# Supplementary material for: Peptide-based Self-adaptive Implant Coating Sequentially Regulates Bone Regeneration to Enhance Interfacial Osseointegration
Source: Research Square preprint supplement (doi:10.21203/rs.3.rs-5132912/v1), 2024-10-01
Supplement: Supplementary file 1 [file report_Filtered_data_stat.xls]

Sample	RawReads(M)	RawBases(G)	CleanReads(M)	CleanBases(G)	ValidBases(%)	Q30(%)	GC(%)
C1	49.82	7.23	47.32	6.87	94.97	95.76	51.98
C2	50.55	7.37	48.39	7.06	95.72	95.83	52.03
C3	48.89	7.20	47.47	6.99	97.09	96.04	51.77
S1	49.67	7.29	48.00	7.04	96.64	96.09	51.61
S2	50.42	7.35	48.29	7.04	95.77	95.76	51.84
S3	49.65	7.24	47.68	6.95	96.03	95.88	51.40
