# Supplementary material for: Peptide-based Self-adaptive Implant Coating Sequentially Regulates Bone Regeneration to Enhance Interfacial Osseointegration
Source: Research Square preprint supplement (doi:10.21203/rs.3.rs-5132912/v1), 2024-10-01
Supplement: Supplementary file 5 [file genome_mapping_stat.xls]

Sample	Total reads	Total mapped reads	Multiple mapped	Uniquely mapped	Read-1	Read-2	Reads map to '+'	Reads map to '-'	Non-splice reads	Splice reads	Reads mapped in proper pairs
C1	47320880	46726224(98.74%)	1777903(3.76%)	44948321(94.99%)	22492491(47.53%)	22455830(47.45%)	22469155(47.48%)	22479166(47.50%)	21635304(45.72%)	23313017(49.27%)	44518100(94.08%)
C2	48392418	47790249(98.76%)	1812093(3.74%)	45978156(95.01%)	23000344(47.53%)	22977812(47.48%)	22984153(47.50%)	22994003(47.52%)	22154769(45.78%)	23823387(49.23%)	45551504(94.13%)
C3	47470494	46882155(98.76%)	1718038(3.62%)	45164117(95.14%)	22596028(47.60%)	22568089(47.54%)	22575203(47.56%)	22588914(47.59%)	21726362(45.77%)	23437755(49.37%)	44734642(94.24%)
S1	47995446	47394705(98.75%)	1803531(3.76%)	45591174(94.99%)	22810507(47.53%)	22780667(47.46%)	22790915(47.49%)	22800259(47.51%)	22494170(46.87%)	23097004(48.12%)	45157078(94.09%)
S2	48291424	47676512(98.73%)	1866033(3.86%)	45810479(94.86%)	22914604(47.45%)	22895875(47.41%)	22901171(47.42%)	22909308(47.44%)	22391533(46.37%)	23418946(48.50%)	45384510(93.98%)
S3	47678892	47064592(98.71%)	1796052(3.77%)	45268540(94.94%)	22645196(47.50%)	22623344(47.45%)	22630423(47.46%)	22638117(47.48%)	22649590(47.50%)	22618950(47.44%)	44837680(94.04%)
