# Supplementary material for: Peptide-based Self-adaptive Implant Coating Sequentially Regulates Bone Regeneration to Enhance Interfacial Osseointegration
Source: Research Square preprint supplement (doi:10.21203/rs.3.rs-5132912/v1), 2024-10-01
Supplement: Supplementary file 9 [file 0-GSEA.xlsx]

## Sheet: Sheet1
gene	E1	E2	E3	C1	C2	C3
Akt2	30.3847	33.6224	32.1276	31.3986	33.0801	31.0342
Akt3	4.74275	5.06364	5.08693	4.25464	3.98415	4.43006
Angpt1	11.1399	9.57818	12.0688	2.83471	2.90648	3.3753
Angpt2	0.792751	0.797457	0.339104	0.221484	0.196017	0.357611
Angpt4	33.2133	34.5999	33.1573	10.3231	10.7287	9.37066
Areg	0.309115	1.16627	0.942108	0.583427	0.326111	0.768845
Artn	0.0997584	0.0726348	0.0427908	0.596236	0.635845	0.561073
Atf2	9.93584	9.03774	10.1926	9.31341	9.55606	10.2489
Atf6b	33.6935	35.6228	34.6195	38.1078	38.0347	35.4764
Bad	22.5339	25.3098	23.6796	18.3699	18.352	18.4971
Bcl2	0.481999	0.259222	0.142821	0.284291	0.41713	0.263261
Bcl2l1	7.97338	8.20939	7.90841	4.92398	4.91157	4.95393
Bcl2l11	5.10114	4.88011	4.62018	5.41643	5.70294	5.34532
Bdnf	1.02045	1.16055	1.1234	1.25691	1.08268	1.15244
Brca1	0.639599	0.832681	0.729346	0.471832	0.580953	0.506735
Casp9	6.18286	6.81658	7.21259	6.65586	5.47854	5.68377
Ccnd1	235.572	230.544	240.291	78.2249	78.4274	79.8652
Ccnd2	23.3433	27.5829	23.2386	33.6263	30.6731	27.9789
Ccnd3	102.364	110.647	97.4276	59.487	61.0793	53.5857
Ccne1	8.59973	8.18171	8.01839	7.0078	7.3363	6.42764
Ccne2	1.87648	1.58119	2.35159	1.1359	0.799757	0.921171
Cdc37	100.853	110.934	99.0122	95.2768	93.4879	89.2451
Cdk2	2.40496	2.7653	2.62289	2.44062	3.08695	2.30912
Cdk4	94.6069	95.4238	89.5067	117.491	125.029	113.57
Cdk6	19.1417	17.0615	19.0859	10.6311	10.247	11.5403
Cdkn1a	225.247	244.814	229.082	155.361	156.423	141.039
Cdkn1b	16.8707	15.0656	17.3698	13.9359	16.2566	18.1754
Chrm2	0.0489725	0.0486235	0.0207301	0.0247584	0.024218	0.0493811
Chuk	6.8668	6.94212	7.71592	7.15595	7.59059	7.16502
Col1a1	2526.78	2495.83	2367.83	5956.1	6023.94	5759.44
Col2a1	0	0	0	0	0.0463464	0.00472507
Col4a1	280.82	277.111	271.152	306.416	301.7	304.205
Col4a2	209.936	207.381	199.77	255.494	248.554	248.508
Col4a3	0.0574575	0.0256716	0.0233489	0.0087144	0.0113656	0.0521431
Col4a5	8.95368	8.09893	9.35255	8.75432	8.71656	10.464
Col4a6	0.150712	0.214698	0.0798843	0.221955	0.366173	0.254384
Col6a1	642.141	654.187	625.304	189.134	182.088	177.135
Col6a2	472.04	486.4	451.71	184.552	187.844	176.46
Col6a3	40.4471	37.1502	37.8414	35.6358	34.7534	35.5316
Col6a4	0	0.00301056	0	0.00306587	0.00599791	0.0091724
Col6a5	0.0222801	0	0.00282935	0.087295	0.168025	0.0954806
Col6a6	0.00248512	0	0.0100987	0	0	0
Col9a1	0.0058653	0	0	0.0237219	0	0
Col9a2	0.152246	0.0875141	0.211653	0.988442	1.29973	0.848377
Col9a3	0.0624755	0.0620302	0	0.00902426	0.00882731	0.0359981
Comp	0.30599	0.125098	0.0457149	0.31849	0.445056	0.526338
Creb1	2.79721	2.35873	2.7189	2.77543	2.70193	3.40047
Creb3l1	25.0205	24.7376	24.4741	40.9105	45.3626	40.6658
Creb3l2	26.3941	26.4402	27.0587	18.2637	18.3364	17.899
Creb3l4	0	0	0	0.014806	0	0
Creb5	0.0434497	0.0534562	0.0422222	0.0525281	0.0476448	0.0761952
Csf1	314.413	303.354	312.2	130.936	132.75	129.033
Csf3	0.218918	0.0956376	0.0889614	0.247913	0.155895	0.291383
Csf3r	0.0119708	0.00594273	0.00608068	0.0121038	0.0177595	0.0482826
Ddit4	39.2899	40.7125	40.5704	31.4178	31.4106	34.7485
Efna1	0.664993	0.62316	0.68317	0.740376	0.886797	0.497255
Efna2	0.166804	0.236593	0.234015	0.481879	0.439938	0.256298
Efna3	0.298465	0.246948	0.373967	0.382257	0.226317	0.180573
Efna5	5.16491	4.94981	5.29057	4.43551	4.75735	4.82861
Egf	0.241495	0.220437	0.304696	0.275686	0.25426	0.192451
Egfr	5.41365	5.20579	5.86632	6.58556	6.81329	7.04837
Eif4b	98.3885	100.726	101.815	112.051	107.314	107.686
Eif4e	23.0913	21.1643	24.0552	21.6337	21.5557	23.4082
Eif4e2	31.2226	33.4191	31.348	27.5804	30.1053	29.9682
Epha2	14.4878	13.4288	13.6606	15.9283	14.8321	15.2253
Epor	0.0133927	0.0265944	0.0408176	0.0135415	0.145705	0.0405132
Erbb2	4.0364	4.57351	4.04016	3.23834	3.51682	3.2166
Erbb3	0.117163	0.0712976	0.0729526	0.202537	0.254187	0.213415
Erbb4	0.0150088	0.0074509	0.00952982	0.00189695	0.0148444	0.0037835
Ereg	3.5205	2.22692	3.69192	1.34921	0.393122	1.231
F2r	33.9713	34.1825	34.5543	30.6558	31.3277	31.9599
Faslg	0.00977227	0.00970262	0.00744588	0.0247022	0.0193305	0.0221711
Fgf1	1.75216	1.5054	1.61137	1.53748	1.69407	1.66985
Fgf16	0.0285739	0.00945674	0.00967625	0	0	0
Fgf18	0.0599449	0.0223191	0.0685115	0.136375	0.0592882	0.0680006
Fgf2	2.23731	2.05939	2.6991	2.96911	2.0745	2.63197
Fgf21	0	0	0.128637	0.102423	0.0500938	0.0255356
Fgf22	0.0240236	0.0536678	0.0305075	0.00303632	0.0415807	0.039364
Fgf23	0.0630219	0.143023	0.0914645	0.0546191	0.071236	0.145252
Fgf7	130.224	118.107	139.661	120.014	115.035	134.965
Fgf8	0	0	0	0.0181237	0	0
Fgf9	0	0.0327169	0.0239117	0.0237986	0	0.01424
Fgfr1	20.2584	20.5837	19.5708	28.8099	29.1447	28.169
Fgfr2	9.54391	9.44473	9.44992	10.4341	9.39946	9.20315
Fgfr3	2.57266	3.34316	2.66303	1.56294	1.20809	1.48236
Fgfr4	0	0	0.015172	0.0075501	0	0
Flt1	0.0444716	0.0211174	0.0314292	0.0430108	0.057371	0.0448426
Flt3	0.0645535	0.00640934	0.0524649	0	0	0
Flt3lg	8.19714	8.11713	6.45005	4.44091	6.19341	4.2972
Flt4	1.28225	1.10588	0.905242	0.835036	0.660972	0.750569
Foxo3	24.8633	23.0846	22.6132	9.01964	9.31985	9.21749
G6pc1	0.0104355	0.0103612	0	0.021103	0	0
G6pc3	53.7998	59.4071	52.6397	64.0029	65.6289	59.6656
Gdnf	1.36454	1.29304	0.97333	0.666785	0.894256	0.940979
Ghr	5.55299	5.75933	5.52564	2.93507	3.41974	2.98697
Gnb1	119.866	121.044	118.157	108.861	103.895	105.198
Gnb2	79.1413	86.0132	76.6794	83.1172	81.8013	76.3533
Gnb3	0.106522	0.166198	0.123677	0.0923189	0.0301013	0.0613773
Gnb4	6.99925	7.42446	7.20542	6.37179	5.89181	6.45247
Gnb5	10.7102	11.107	10.1315	9.45265	10.548	10.0216
Gng10	93.5874	94.5199	99.1126	83.9175	86.2983	90.7858
Gng11	9.91517	9.03608	9.17912	7.68832	7.2088	9.3093
Gng12	29.3544	27.9477	30.2769	30.7825	31.3583	34.3967
Gng13	0.487206	1.49957	1.3364	2.41384	2.50572	2.94763
Gng2	2.82789	2.13778	2.0316	4.14322	3.90719	4.33599
Gng3	0.69823	1.22339	1.52301	2.40867	2.15299	1.67731
Gng4	0.00689724	0.00684808	0.0140141	0.0348694	0.0272867	0.0417287
Gng5	83.2732	80.2663	79.2629	70.3804	75.4682	80.3343
Gng7	0.123845	0.151338	0.0871038	0.110773	0.0753775	0.158499
Gng8	7.03766	7.03417	8.63011	6.76958	6.80116	7.0422
Gngt2	0.0611727	0.125812	0.0621466	0.349025	0.384624	0.37891
Grb2	42.7511	43.9675	43.0495	45.6008	43.8162	44.3843
Gsk3b	12.8121	12.5824	12.9867	13.481	13.7199	14.8945
Gys1	38.0545	40.4457	35.9361	55.3291	53.4173	49.7956
Gys2	0.036796	0	0	0.0186025	0.0636876	0
Hras	17.8339	17.4285	16.0403	17.4443	17.0431	15.9835
Hsp90aa1	144.926	133.307	162.072	126.842	127.412	154.622
Hsp90ab1	543.414	533.337	546.036	478.315	469.599	475.585
Hsp90b1	492.276	447.887	507.81	365.227	361.05	407.268
Ibsp	93.1254	87.2602	95.3646	0.27164	0.120778	0.258582
Ifnar1	17.0953	16.2284	16.7887	11.6258	11.9894	12.1374
Ifnar2	9.41301	8.34337	9.52155	10.0795	8.99487	10.0997
Igf1	2.42322	2.75001	2.78558	8.12794	8.05812	9.32994
Igf1r	14.1499	13.7998	13.9726	9.68085	10.0878	10.0504
Igf2	0.429363	0.396561	0.34152	0.403846	0.595841	0.51685
Ikbkb	9.87856	9.53334	9.84166	10.0883	9.5357	9.72839
Ikbkg	4.84921	4.49048	4.7072	3.66584	3.21798	3.17771
Il2ra	0.0169453	0	0.0114767	0	0	0.0113911
Il2rb	0.0900655	0.0804812	0.00914993	0.118386	0.080171	0.0544901
Il2rg	2.0304	1.79838	1.2317	2.83574	2.77385	2.43029
Il3ra	3.57959	3.73386	4.25918	3.57712	3.43017	3.8763
Il4r	13.1693	15.554	12.8474	13.4686	13.873	13.6097
Il6r	2.11673	1.91445	2.01113	0.814509	1.17815	1.2789
Il7	0.729447	0.819543	1.05308	0.572574	0.749935	0.629074
Il7r	0.121092	0.184968	0.222382	0.353187	0.419181	0.601121
Ins2	0.231861	0.166196	0.210314	0.120807	0.123436	0.158051
Insr	3.23091	3.59512	3.3079	3.81637	3.74801	4.11546
Itga1	11.018	10.1862	11.6847	9.91689	10.047	11.5868
Itga10	0.465293	0.527306	0.515672	0.0427694	0.0790235	0.0142174
Itga2	0.181293	0.122144	0.236802	0.209495	0.307384	0.280738
Itga2b	0.115316	0.108133	0.130169	0.0582988	0.196424	0.167957
Itga3	204.015	209.65	192.871	58.8489	58.4844	54.0366
Itga4	10.0668	10.0399	10.9072	0.635391	1.11306	1.05608
Itga5	40.1032	40.2681	38.1317	39.9243	42.3992	39.2912
Itga6	7.76072	7.34142	7.6914	3.72656	3.62257	3.90778
Itga9	0.116857	0.0757382	0.136855	0.297031	0.280917	0.258576
Itgb3	7.49776	7.4512	7.20176	4.61731	4.81125	4.83524
Itgb4	0.580107	0.489388	0.346672	0.161015	0.217501	0.244684
Itgb5	267.313	284.151	255.115	156.692	155.723	145.688
Itgb6	0.0380755	0.0850593	0.0531873	0.0529357	0.047073	0.0479915
Itgb7	0.917876	1.29661	0.841514	0.369722	0.088568	0.150493
Itgb8	0.451582	0.456823	0.49628	0.278555	0.176969	0.274928
Jak1	63.5899	61.1037	66.0532	46.8773	46.3543	47.4626
Jak2	14.3168	13.4117	16.2555	17.7409	16.8702	18.4044
Jak3	3.39461	3.67303	3.23511	2.96478	3.19112	2.79769
Kdr	0	0	0.0040806	0.0040613	0	0
Kit	0.00448536	0.0445339	0	0	0.0310536	0.0226139
Kitlg	32.0805	28.4043	35.3108	18.0677	17.0748	20.4637
Kras	9.37014	8.01604	10.2993	10.7573	9.82227	11.7061
LOC367858	0.354818	1.03338	0.43256	0.789276	0.538095	0.50089
Lama1	0.0214326	0	0.0169351	0.069828	0.0518168	0.045624
Lama2	1.96115	1.59712	1.58444	1.39375	1.40208	1.44672
Lama3	0.32506	0.329097	0.28213	0.513713	0.44934	0.40778
Lama5	8.21523	8.15668	7.31633	2.86271	2.6014	2.54447
Lamb1	89.098	84.548	84.4871	91.2219	88.0179	88.1758
Lamb3	0.108642	0.158963	0.110371	0.219699	0.220559	0.294051
Lamc1	157.602	154.791	151.545	95.0349	93.0068	93.9084
Lamc2	1.58307	1.64813	1.49799	1.67841	1.78493	1.71486
Lamc3	0.0181805	0.0108305	0.00369397	0.007353	0.0359626	0.0146657
Lpar1	7.66027	7.39369	7.60002	4.44403	4.16404	4.78778
Lpar2	0.0227107	0.0135293	0.0415301	0.00459263	0.0314467	0.0687006
Lpar3	0.115588	0.0401675	0.0821997	0.0934981	0.154335	0.128208
Lpar4	0.166709	0.154486	0.0959722	0.106756	0.12641	0.207323
Lpar5	0.050148	0.0331937	0.00849106	0	0.00826645	0.0168555
Magi1	2.0661	2.00845	1.95335	2.59982	2.79964	2.50322
Magi2	0.340694	0.310077	0.378566	0.351657	0.189541	0.135983
Map2k1	44.7803	47.6393	47.6203	55.1427	50.4372	52.2503
Map2k2	35.872	40.3661	36.8417	51.9263	50.4945	44.2972
Mapk1	15.2539	15.382	16.5451	14.7594	14.6202	14.6946
Mapk3	90.6823	100.31	85.374	79.4766	81.8535	72.7867
Mcl1	23.7588	22.1452	24.4237	18.7544	17.334	18.8398
Mdm2	54.0959	51.2372	55.9413	41.3831	42.0608	43.9978
Met	5.40673	5.4997	5.55836	3.71895	4.22224	3.87998
Mlst8	4.48416	5.36431	4.25223	4.52239	4.50887	4.78789
Mtcp1	0.937059	0.722086	1.74766	0.579797	0.95446	0.648721
Mtor	10.6459	10.7186	10.1002	9.23128	9.63015	9.65595
Myb	0.0404558	0	0.00587141	0.00584363	0.0057161	0
Myc	24.1433	26.6213	25.3185	9.37414	8.73957	9.58293
Nfkb1	14.9573	15.8891	16.8144	13.3331	14.2626	13.3802
Ngfr	0.0507494	0.0719824	0.0147307	0.00733048	0.014341	0.0292416
Nos3	0.00594631	0.00590393	0	0.0060124	0	0.00599592
Nras	21.3943	21.7128	22.6652	21.0351	20.1177	23.0302
Nrtn	0	0.0200422	0	0.0204104	0	0
Ntf4	0.0785347	0.129958	0.0930824	0.0926421	0.0388372	0.290363
Ntrk1	0	0.0353393	0	0.0179943	0.00880077	0.10767
Osm	0.0122972	0	0.0249859	0.142989	0.0972998	0.198396
Osmr	20.6398	19.6207	21.8319	17.9062	18.4211	20.5894
Pdgfb	0.00908604	0	0	0.018374	0.00898651	0.0458092
Pdgfc	50.119	47.321	50.9657	29.2122	30.1982	30.8601
Pdgfd	4.00463	4.11613	3.74441	0.861914	1.15851	1.05125
Pdgfra	48.3307	43.8211	46.0645	46.5368	46.1073	47.7953
Pdpk1	8.88298	8.24972	8.72127	8.45703	8.25321	8.5385
Pgf	16.4369	15.4474	15.8983	6.49465	7.35678	6.17134
Phlpp1	4.30683	4.66319	4.16596	4.71096	4.65633	4.76608
Phlpp2	2.27598	2.52029	2.70628	2.57812	2.47672	2.5308
Pik3ca	7.06631	6.57967	7.18243	7.05815	7.29277	7.92136
Pik3cg	0.650003	0.432465	0.394849	0.535267	0.536841	0.550693
Pik3r1	16.3835	15.5013	16.8758	7.00567	7.2508	8.17208
Pik3r2	19.5327	20.9583	18.3715	19.5987	21.1287	18.7993
Pik3r3	5.66304	4.9581	5.53846	10.4768	11.3065	10.9499
Pik3r5	0.171205	0.14423	0.115954	1.04389	0.990324	0.889325
Pik3r6	0.00391505	0.00388715	0.00397737	0.0395856	0.00387216	0.00394771
Pkn1	7.54199	6.85949	6.5495	6.98069	7.46408	6.6735
Pkn2	11.1483	10.0038	11.2707	9.31827	9.15205	10.3365
Pkn3	0.546599	0.479196	0.555301	0.405686	0.471598	0.392848
Ppp2ca	54.7105	50.8252	53.6977	51.6576	51.348	50.8971
Ppp2cb	43.44	46.9447	48.5811	49.636	48.804	49.1232
Ppp2r1a	106.938	112.426	103.041	97.4027	96.4542	88.3447
Ppp2r1b	7.93597	8.36996	7.85526	5.6013	5.65009	5.46141
Ppp2r2a	43.4464	44.1331	44.1765	30.4029	32.6515	34.0619
Ppp2r2b	0.00563499	0	0	0	0.00557326	0.08523
Ppp2r2c	1.97224	2.12748	2.02096	1.3735	1.40536	1.09464
Ppp2r2d	10.3152	10.5126	9.2662	9.37186	9.03234	10.2751
Ppp2r3a	0.726774	0.718299	0.755201	1.05362	1.03063	1.05408
Ppp2r3b	1.71477	2.34697	1.82347	1.91207	2.34585	1.98763
Ppp2r3c	7.40127	7.01891	6.92392	6.17045	6.56693	5.82864
Ppp2r5a	12.9975	11.6732	12.7874	10.366	10.7442	11.2573
Ppp2r5c	23.505	22.7335	25.1514	23.4474	22.0749	23.8444
Ppp2r5d	22.1576	22.9997	21.2129	18.8962	19.0502	16.634
Ppp2r5e	5.66335	5.38059	6.0206	5.25972	6.1771	6.47616
Prkaa1	8.75216	7.89755	8.95229	6.63581	7.36401	8.48324
Prkaa2	0.0570388	0.0495532	0.0338023	0.088912	0.0235058	0.0575146
Prkca	9.31684	9.24259	9.0662	6.63557	6.94954	7.64854
Prl5a1	0	0	0	0.0281002	0.0549738	0
Prl6a1	0.452188	0.204075	0.501149	0.353301	0.0406577	0.621765
Pspn	0.156809	0.0311384	0.28675	0.380525	0.55833	0.379482
Pten	32.9492	32.3501	37.4225	31.5208	33.3532	36.7035
Ptk2	11.3108	10.7227	11.1842	11.4712	11.7841	12.7058
Rac1	314.185	300.695	316.635	242.044	248.677	238.125
Raf1	22.0568	22.4964	22.1239	27.1284	26.9165	26.2929
Rbl2	6.30961	5.5047	6.54962	5.35778	5.3379	5.76528
Rela	24.0653	23.0771	21.342	22.3857	23.7921	21.8755
Reln	0.913783	0.89197	0.861014	2.75156	2.26629	2.66167
Ret	0.16414	0.227401	0.213289	0.0347368	0.0339787	0.0461888
Rheb	35.4047	35.0603	36.076	36.6422	37.4544	37.8645
Rps6	988.337	1056.84	1055.12	950.84	996.69	952.974
Rps6kb1	7.95059	8.07035	9.37018	8.33143	7.54471	8.85862
Rps6kb2	9.35296	9.18631	8.46598	7.35678	6.73556	5.3565
Rptor	6.5184	7.35591	6.50731	6.00141	5.61535	5.48266
Rxra	18.7978	19.8308	18.9932	13.2453	14.5357	13.02
Sgk1	103.577	104.342	109.198	13.7702	13.2036	12.9377
Sgk2	0.0262314	0.00868148	0.071064	0.00884097	0	0.0264503
Sgk3	0.671756	0.704811	0.63889	0.640684	0.513612	0.735008
Sos1	5.27869	4.66799	5.22507	4.77293	5.38971	5.42656
Sos2	2.32139	2.08491	2.33677	1.94525	1.82777	2.59779
Spp1	1161.74	1169.27	1165.56	202.343	202.279	209.576
Stk11	16.1341	15.5471	16.6737	18.7988	19.4698	17.8777
Syk	0.555991	0.57519	0.458194	0.935639	0.826774	0.948758
Tek	0.424861	0.385823	0.447415	0.550075	0.625186	0.402283
Tgfa	26.689	26.5567	26.3277	8.24843	7.66997	8.70688
Thbs4	0.705715	0.605801	0.642268	0.572333	0.31991	0.46699
Them4	2.3309	2.74964	3.41133	3.69854	3.48087	3.40916
Tlr4	2.44507	2.73726	2.4984	2.40775	2.2781	2.60125
Tnn	1014.15	982.161	974.448	1092.82	1072.68	1095.9
Tnr	0.0418175	0.0113235	0.0270348	0.0096096	0.0150398	0.00574996
Tsc1	4.71355	4.13877	4.88861	4.19053	4.64292	4.81341
Tsc2	11.7637	13.2645	11.2693	11.7097	11.5681	11.7497
Vegfc	17.7618	18.3479	18.5223	12.2022	10.0262	10.0096
Vegfd	43.6778	42.4335	42.17	9.78607	9.07996	9.4677
Vwf	0.0322775	0.0320474	0.0191283	0.0462346	0.0798098	0.0379712
Ywhab	121.346	118.386	122.438	103.405	104.715	107.884
Ywhae	349.489	333.638	347.008	267.978	267.852	283.695
Ywhag	146.837	152.301	149.032	151.352	149.396	146.372
Ywhah	78.3753	80.6178	80.9919	84.2418	82.7642	80.8125
Ywhaq	146.006	146.399	144.732	128.729	125.429	129.662
Ywhaz	370.792	355.811	382.243	347.77	339.332	367.487
2510039O18Rikl	25.4222	26.0545	22.7778	27.1483	30.9122	25.6507
6430548M08Rikl	4.22797	4.57194	4.62568	3.44483	3.6717	3.9433
A1bg	0.0179585	0	0.054733	0.0363161	0	0.0362166
A1cf	0.0916667	0.00700103	0.0143271	0	0.00697404	0.00711012
A2m	11.4453	10.7001	10.5925	31.8427	31.9981	32.331
A2ml1	0	0	0	0.0154827	0.00504825	0
A3galt2	80.3495	86.2955	77.2703	69.811	71.8858	69.0939
AA926063	0.115222	0.171602	0	0	0	0.0580919
ATP6	2874.83	2828.42	2868.15	2987.5	3209.96	2943.14
ATP8	709.998	590.157	815.399	752.275	784.876	660.212
Aaas	11.4267	10.9299	10.0665	8.7499	9.24459	8.48488
Aacs	10.0758	11.7787	10.2503	14.9398	15.3236	14.5161
Aadacl2fm2	0	0	0.0797849	0.0397037	0.0194186	0.0197975
Aadacl2fm3	0	0	0	0.0381232	0	0
Aadacl3	0	0.00748471	0	0.0152444	0	0.0304053
Aadacl4fm2	0	0	0	0.01937	0.0189473	0
Aadat	0.0654456	0.0389875	0.0797849	0.0132346	0.207132	0.0131983
Aagab	12.8735	12.635	14.0763	13.7636	14.4347	13.7873
Aak1	9.40686	8.91481	9.46097	7.19267	7.24228	7.56751
Aamdc	5.03257	4.94673	5.21493	2.54425	2.7127	2.74026
Aamp	50.1646	52.9042	49.1639	47.9311	49.6625	46.923
Aanat	0	0.0112972	0.0693565	0.0230095	0.0675219	0
Aar2	9.3068	9.11153	9.63714	7.90959	8.29965	7.71956
Aard	0.703125	1.16981	1.06182	1.7101	1.69157	1.11139
Aars1	69.6771	71.0726	67.607	124.347	119.168	116.667
Aars2	2.04704	2.16303	2.56178	2.43981	2.46574	2.13331
Aarsd1	5.63192	5.75396	5.81537	4.73944	5.00829	4.32542
Aasdh	1.80077	1.57056	1.55141	1.73223	1.77022	1.94825
Aasdhppt	25.955	20.729	23.1994	19.3833	21.2796	22.8427
Aass	7.88814	7.41394	7.95061	4.82874	4.9486	4.47453
Aatf	3.40943	3.01937	3.24723	2.79365	2.72553	2.87704
Aatk	0	0.0144882	0.00247074	0.00491811	0.00240539	0.00245232
Abat	0.209459	0.268046	0.118219	0.0847149	0.165732	0.0985632
Abca1	9.05091	8.08082	8.42894	5.48085	5.66045	5.65251
Abca12	0	0.013015	0	0.00441804	0	0.0176237
Abca13	0.00137241	0	0.00278852	0.00138766	0.00271476	0.00553545
Abca16	0.00404894	0.0241205	0.0246804	0.0491273	0.0240275	0.00816545
Abca17	0.00697958	0.0554387	0.0567255	0.0352857	0.0345156	0.0668592
Abca2	2.18692	2.40889	2.23082	2.62046	2.9503	2.40584
Abca3	9.44543	10.0699	8.86972	11.6348	12.3328	10.9981
Abca4	0.152442	0.125033	0.161602	0.154136	0.0589978	0.0568073
Abca5	2.89451	2.26455	3.01504	2.96836	3.2569	3.27888
Abca6	0.015398	0.00764411	0.00782154	0	0.00380732	0
Abca7	2.24995	2.34728	2.39835	2.77409	2.94604	2.77326
Abca8	0.534222	0.534591	0.841867	0.344511	0.232982	0.254494
Abca8a	0.00819741	0.0447644	0.0249837	0.00414425	0.0121614	0
Abca9	3.86523	3.33321	4.19432	2.55794	2.5521	3.02303
Abcb10	3.39896	3.98506	3.90613	3.5647	2.60474	2.41857
Abcb11	0	0	0	0	0	0.00430349
Abcb1a	1.75394	1.96702	1.79571	3.20229	3.30767	3.7021
Abcb1b	70.5471	68.8748	75.6663	41.2631	39.6202	43.4813
Abcb4	0.0926322	0.0990468	0.123063	0.153701	0.19733	0.146095
Abcb6	8.07769	7.69101	7.25461	5.73398	5.24536	4.38134
Abcb7	4.67965	3.77263	4.82525	3.29598	3.7482	4.62795
Abcb8	4.68786	4.56904	4.73821	4.57567	4.89645	4.77997
Abcb9	0.155013	0.174896	0.146743	0.117552	0.073173	0.113677
Abcc1	14.5961	14.12	14.8985	18.5995	18.5346	18.8176
Abcc10	1.77038	1.83357	1.74524	1.51021	1.52444	1.3136
Abcc12	0	0	0.0189523	0	0	0
Abcc2	0.210911	0.158219	0.199984	0.137431	0.152973	0.07089
Abcc3	4.72169	5.12185	5.00947	3.79409	3.83112	3.01733
Abcc4	6.10028	5.71624	6.0063	6.71253	6.71194	6.36315
Abcc5	3.67872	3.22872	4.54224	4.19886	4.76727	4.86503
Abcc6	0	0.00344764	0.00352767	0.00351098	0.00343435	0.00350136
Abcc9	5.99524	5.59834	5.97801	1.91555	1.85003	2.20048
Abcd1	8.89185	7.73501	7.40599	6.11821	5.9723	6.25919
Abcd2	0.781261	0.566852	0.723923	0.347228	0.441545	0.415532
Abcd3	12.1071	11.203	12.1471	9.65058	10.3646	11.2062
Abcd4	4.38134	4.31085	4.23416	5.21368	5.23287	5.50243
Abce1	37.3317	34.8972	39.4557	33.1448	31.6768	34.8049
Abcf1	29.6357	32.2691	33.4801	30.6088	30.6454	32.0611
Abcf2	31.9305	30.683	28.1513	34.5012	33.4011	31.1956
Abcf3	24.664	24.0688	24.2841	19.9828	21.6824	21.4049
Abcg1	1.69082	1.40564	1.84043	1.6282	1.87138	1.80641
Abcg2	0.185205	0.345481	0.250872	0.48802	0.333048	0.464047
Abcg3	0.292741	0.0894321	0.259273	0.170766	0.204159	0.230848
Abcg3l1	3.03715	2.97977	3.2756	1.85564	2.07851	2.14084
Abcg3l2	11.4744	9.9191	11.502	7.94044	8.3459	9.85132
Abcg3l3	6.88328	6.17896	7.36255	8.06984	6.90548	7.69323
Abcg3l4	3.89124	3.79912	3.83459	2.92464	3.09814	3.26976
Abcg4	0.209224	0.214224	0.239124	0.195021	0.248965	0.168116
Abhd1	5.89437	5.76899	6.39765	3.20916	3.77027	2.86171
Abhd10	1.63023	1.79316	1.45321	2.17355	2.28419	1.93391
Abhd11	5.24583	4.24845	3.44839	5.26252	5.37148	4.33539
Abhd12	69.6983	69.4066	65.8462	65.2522	65.0176	61.6188
Abhd12b	0.0741683	0.0184099	0.113023	0	0.018339	0.149574
Abhd13	2.7935	2.58613	2.33228	2.41236	2.6568	2.83411
Abhd14a	3.60775	3.06358	3.35653	3.01427	2.45081	1.99124
Abhd14b	10.2661	11.4259	11.3267	14.1472	13.9339	12.5779
Abhd15	2.57571	2.82296	2.97389	0.664608	0.740816	0.547185
Abhd16a	12.8049	12.9644	12.246	10.2902	10.1263	9.75265
Abhd17a	11.9693	12.7967	11.7396	10.9831	10.8533	10.281
Abhd17b	3.74295	2.91736	3.55454	3.78454	3.46946	3.07222
Abhd17c	2.90644	2.79779	3.27715	2.6701	2.85868	2.76562
Abhd18	1.23871	1.20007	1.60927	1.59407	2.04191	1.41559
Abhd2	33.0184	33.8522	33.5203	26.4858	26.6834	25.5399
Abhd3	1.57277	1.61074	1.40909	1.55268	0.930874	1.48599
Abhd4	62.8732	66.485	61.2398	50.9164	48.8105	45.7654
Abhd5	18.8089	19.1069	19.6209	15.8419	15.677	17.9482
Abhd6	8.58244	8.67318	8.71907	6.83618	6.78786	7.14804
Abhd8	9.71261	9.44174	9.56381	10.1708	12.442	11.3838
Abi1	23.7507	21.2059	23.4659	16.9465	18.3753	20.4458
Abi2	9.61667	9.34903	9.6679	8.16067	8.43706	8.48373
Abi3	0.0983081	0.0418318	0.171211	0.284002	0.236133	0.254901
Abi3bp	9.71896	8.06606	9.41185	9.71206	9.04273	10.6457
Abitram	6.89033	6.51076	6.97036	6.07538	5.7753	6.32958
Abl1	27.4505	28.2365	26.7692	23.5113	26.1091	23.5372
Abl2	2.27353	2.13654	2.59748	2.04893	2.1565	2.33659
Ablim1	0.826894	0.800406	0.79408	0.166835	0.158532	0.192048
Ablim2	0.0233612	0.069584	0.0339044	0.0371184	0.0429098	0.0201909
Ablim3	0.0425198	0.0263855	0.0485963	0.22571	0.136676	0.144702
Abo	1.52246	2.14807	1.31605	0.594145	0.686847	0.754113
Abo2	0	0.0124851	0	0	0	0
Abr	11.5726	11.6186	11.3494	8.65462	8.3628	7.9219
Abracl	64.5484	66.3043	71.5986	90.1239	86.4324	89.2089
Abraxas1	2.24172	2.27212	2.6807	2.19581	2.54051	2.31929
Abraxas2	10.4656	9.62858	9.32932	10.0696	9.8107	10.2496
Abt1	12.0577	9.63888	10.4362	10.8841	9.43959	10.2115
Abtb1	5.37876	6.1647	7.0443	4.13801	3.8164	3.43104
Abtb2	3.00709	3.65378	3.72791	2.20596	1.79385	1.79174
Abtb3	0.174077	0.142778	0.180692	0.091832	0.224569	0.179345
Acaa1a	16.1502	21.143	16.3676	12.9189	13.603	12.0298
Acaa1b	0.103077	0.0438609	0.164556	0.342445	0.160204	0.0742406
Acaa2	24.9969	30.056	26.5411	25.0525	22.5493	22.221
Acaca	6.892	6.24094	6.57797	8.47412	8.5674	8.59518
Acacb	0.00396255	0.00786862	0.00805126	0.0180296	0.013717	0.0299671
Acad10	1.39304	1.26017	1.28243	1.31462	1.18047	1.35264
Acad11	16.643	15.5591	16.2883	7.66905	7.48376	7.30095
Acad8	5.65951	6.18553	6.53364	7.28306	6.67055	6.68792
Acad9	14.8679	15.3394	14.4646	12.348	12.3852	11.63
Acadl	46.8024	45.7407	46.8687	43.4009	40.5357	40.505
Acadm	22.7325	21.0899	25.2376	21.3057	23.0351	23.0322
Acads	9.63113	9.37419	10.5689	13.4499	12.7276	11.9789
Acadsb	14.5208	13.3062	17.4279	13.2609	14.7127	15.3988
Acadvl	38.4288	36.5532	36.2006	26.9354	25.9542	24.9119
Acan	0.0183837	0	0.0186764	0.006196	0	0
Acap1	0.0383764	0.123834	0.194936	0.0582043	0.085401	0
Acap2	19.7682	17.1891	19.5653	17.4836	18.6691	19.8587
Acap3	5.92401	6.71278	6.06053	5.16159	5.43054	5.29109
Acat1	30.6539	29.1556	29.2051	25.3542	25.2829	25.1537
Acat2	21.7825	24.094	22.1891	34.6084	38.9188	36.7338
Acat2l1	0.0299914	0.119111	0	0.0758118	0.148314	0.0302416
Acbd3	24.8693	23.258	25.9676	24.7442	24.5495	26.2157
Acbd4	2.03136	2.35208	1.96487	2.09443	2.03741	1.98484
Acbd5	6.51583	6.25621	7.61059	5.2149	5.27189	6.57019
Acbd6	1.59404	1.47305	1.7456	1.40011	1.37637	1.38003
Acbd7	0.0192819	0	0	0.0779849	0	0
Accs	3.01173	2.81885	2.75436	3.96975	3.78825	4.31995
Accsl	0.0218535	0.0216977	0.111007	0.209915	0.0864563	0.264429
Acd	7.2994	7.88311	9.52319	7.92434	9.19528	8.12215
Ace	1.79502	2.04899	1.34737	0.306348	0.203544	0.167165
Ace2	0.0199648	0.02643	0.0608478	0	0	0.0469731
Acer1	0	0	0.171059	0.0425624	0	0
Acer2	4.19194	3.83656	3.77593	0.24582	0.29146	0.28229
Acer3	7.82084	7.06766	8.37801	6.78926	6.63014	7.65185
Ache	0.147044	0.202773	0.215779	0.231278	0.185832	0.127678
Acin1	23.1243	22.9339	26.8385	22.1047	22.786	24.1832
Ackr2	0.0135614	0	0	0	0.00268257	0
Ackr3	26.5685	28.0789	28.2563	25.4475	24.4853	23.73
Ackr4	59.2073	62.2743	59.6587	31.9894	31.6061	31.8304
Acly	48.1241	47.1703	47.6623	58.4028	56.8213	56.0194
Acmsd	0.00876322	0	0	0.00886061	0	0
Aco1	31.2141	30.2468	31.8495	28.2097	28.7542	27.0459
Aco2	111.138	120.914	106.688	98.2123	96.2623	89.8337
Acod1	0.00525016	0	0	0	0	0
Acot1	0.149957	0.223332	0.167579	0.0606494	0.0444943	0
Acot11	0.856463	0.794987	0.740595	0.66459	0.799802	0.735071
Acot13	6.30994	8.38493	7.12266	5.96117	5.70499	7.71223
Acot2	2.51801	1.91399	2.84654	2.1758	2.16526	2.81778
Acot3	6.04595	7.20552	5.96029	3.59972	3.03153	3.1013
Acot4	0.143722	0.124861	0.14601	0.00908246	0.0533054	0.0452879
Acot5	0.0889681	0.100953	0.348626	0.12851	0.050282	0.205052
Acot6	0	0	0	0	0	0.0605216
Acot7	16.939	19.8813	17.3822	17.5762	18.296	17.4592
Acot8	4.5858	4.27095	4.18636	5.65554	5.45545	5.106
Acot9	23.8802	22.6448	24.9399	23.4819	23.1442	25.3648
Acox1	27.3396	24.8966	24.93	20.8178	20.8042	20.5179
Acox2	0.0234728	0.104875	0.0894244	0.0593342	0.0116079	0.0236687
Acox3	8.42383	8.5424	8.99654	6.32443	6.07456	6.21381
Acoxl	0.0773798	0.017073	0.00873463	0.0260799	0.0127554	0.0216737
Acp1	17.104	16.681	17.8383	12.7511	11.7912	13.1748
Acp2	31.7134	32.8511	30.7298	27.6294	28.9283	27.5768
Acp3	0.0734849	0.0798013	0.0256626	0.141637	0.134004	0.0995692
Acp4	0.0265302	0.0131706	0.0404288	0.00670626	0.0262396	0.00668789
Acp5	2.90727	2.67801	2.68403	3.21901	3.78288	3.04299
Acp6	17.7587	17.3275	18.0414	10.6933	9.8352	9.9907
Acrbp	0.492384	0.249869	0.433526	0.575301	0.183974	0.573724
Acsbg1	0.00844143	0.0419063	0.0171516	0.0512115	0	0
Acsbg2	0	0.0259845	0	0	0	0
Acsf2	5.37095	4.77655	4.11572	4.0497	3.82472	3.44288
Acsf3	7.15996	9.03661	6.66865	6.95909	5.49657	6.26674
Acsl1	6.34401	5.7097	6.26417	4.60091	5.53873	5.28783
Acsl3	7.71582	7.68442	7.92718	12.7596	13.108	14.8415
Acsl4	7.33031	6.83055	7.91094	8.59011	9.23849	10.9407
Acsl5	34.797	37.5627	35.904	25.5593	26.3992	26.0881
Acsl6	0.00819741	0.0488339	0.00416395	0.0124328	0.020269	0.0661264
Acsm1	0	0.0114124	0	0	0.0113684	0
Acsm3	0	0	0	0	0.00898996	0
Acsm4	0.0230333	0	0	0	0	0
Acsm5	0	0	0	0.0262299	0.00641436	0
Acss1	0.138315	0.196185	0.107061	0.166491	0.0977142	0.152752
Acss2	5.89699	5.92665	5.23895	8.06158	7.82017	6.85025
Acss3	5.34711	5.18884	5.72018	1.39108	1.43946	1.56068
Acta1	10.241	9.82799	9.65851	24.436	23.2253	19.2058
Acta2	477.265	513.045	470.619	2576.45	2548.32	2414.88
Actb	4024.87	4373.09	3911.99	4588.97	4562.3	4186.84
Actg1	1004.99	1030.06	961.664	1195.45	1173.97	1149.82
Actg2	34.4503	38.0557	35.3773	195.983	193.046	182.757
Actl10	0.930723	1.01806	0.544887	1.26007	0.670893	0.874861
Actl6a	10.7513	11.5716	11.685	11.7455	12.4456	13.7918
Actl7a	0	0	0	0	0.0574343	0
Actl7b	0.119329	0.253882	0.0692733	0.0172364	0.101161	0.0171892
Actmap	3.51692	3.67351	3.37671	3.64336	3.57893	3.53601
Actn1	128.742	130.412	125.54	199.711	200.867	190.857
Actn2	0.0321824	0.0958592	0.0408684	0.260321	0.0954897	0.154142
Actn3	0.08256	0.11476	0.0922618	0.141912	0.0734901	0.0416244
Actn4	205.821	208.666	197.582	262.174	262.511	254.928
Actr10	36.5109	37.0979	37.2861	33.2841	34.5231	36.0457
Actr1a	66.4593	70.7989	66.6055	67.5705	66.3573	64.1131
Actr1b	27.8234	30.0678	27.3044	31.6982	30.6746	30.0251
Actr2	100.641	96.8389	107.29	104.284	101.18	109.713
Actr3	198.047	188.481	209.717	212.826	207.699	217.578
Actr3b	1.9687	2.00808	1.95633	1.04424	0.978888	0.791881
Actr5	1.75993	1.60571	1.72996	1.04846	1.74065	1.58276
Actr6	6.20578	5.21426	6.136	6.04825	5.26801	6.58382
Actr8	8.33217	8.05675	8.8549	8.3083	8.72194	9.03407
Acvr1	9.92107	9.38838	9.96346	13.978	14.1791	12.871
Acvr1b	3.54092	3.79556	3.53452	2.81502	2.65047	2.68271
Acvr1c	0.0129886	0	0.00263907	0	0.00256926	0
Acvr2a	5.453	4.11257	4.51323	3.98562	4.15525	4.52088
Acvr2b	0.0667168	0.0972919	0.0910779	0.0695663	0.065986	0.0798872
Acvrl1	7.17924	7.77059	7.5801	6.20764	6.24721	6.90451
Acy1	8.8635	9.17749	9.57633	10.3419	10.8397	11.1789
Acy3	1.3515	1.14506	1.42793	1.42118	1.05153	1.17198
Acyp1	13.2548	12.1652	15.5277	7.52443	7.68237	10.5104
Acyp2	2.54684	2.63863	2.79362	3.3962	2.81099	3.68465
Ada	5.45606	5.64069	5.20657	4.31159	4.99026	5.23451
Adad2	0.0131254	0	0	0	0	0
Adal	0.853851	0.783649	0.663339	0.914125	0.872884	0.824799
Adam10	30.0654	27.1679	30.258	21.5441	20.9811	23.3017
Adam11	0.00447434	0.00444245	0.0272734	0.0407166	0.0177013	0.00451167
Adam12	96.78	92.1478	92.86	118.833	117.582	121.372
Adam15	29.7439	31.103	28.5374	21.2171	22.8055	20.7781
Adam17	25.7768	23.8758	26.0231	16.8237	16.3082	17.4054
Adam19	29.2733	26.5619	28.8041	57.7174	57.5282	57.0081
Adam1a	0.156864	0.204929	0.201298	0.208694	0.359285	0.216447
Adam2	0	0	0.0356901	0.00888033	0	0
Adam22	1.44403	1.29743	1.53427	0.711449	0.783215	0.796024
Adam23	26.5769	24.1159	26.2177	21.5195	20.3322	20.4303
Adam30	0	0.00683216	0.0139815	0	0	0
Adam32	0	0.00895598	0.00916387	0.018241	0	0
Adam33	1.05036	1.13972	1.18142	1.10755	1.48408	1.20287
Adam4	0.0290293	0.134504	0.0294914	0.0195679	0.210549	0.0780573
Adam4l1	0.0768773	0.0763294	0.0878638	0.0485823	0.123557	0.125968
Adam6	0	0	0	0	0.0376357	0
Adam8	2.30621	2.13828	2.09849	0.69421	0.731295	0.828403
Adam9	35.303	35.932	34.2384	23.9052	23.9722	26.5346
Adamts1	136.002	128.396	134.144	138.614	135.712	143.468
Adamts10	18.5806	17.8656	18.4322	22.8613	22.4499	22.4079
Adamts12	1.91132	1.79463	2.01052	1.80479	2.11357	1.99553
Adamts13	0.0232962	0.0231301	0.047334	0.0471101	0.0276492	0.046981
Adamts14	0.595478	0.555128	0.655756	2.52329	2.82339	2.58971
Adamts15	16.9216	16.0269	16.0715	5.94239	5.45187	5.54313
Adamts16	0.00360894	0	0.00183319	0.00182452	0	0.00181952
Adamts17	0.174914	0.173668	0.0756866	0.042577	0.0608698	0.11105
Adamts18	0	0.00399006	0.00408268	0	0	0
Adamts2	5.3213	5.6554	5.04135	5.31676	6.23153	5.91497
Adamts20	0.0313856	0.0267102	0.0364403	0.00906698	0.0177382	0.00452107
Adamts3	0.112286	0.146324	0.0570365	0.216423	0.242934	0.208754
Adamts4	1.77994	1.87991	2.11086	2.9613	3.18423	3.04614
Adamts5	32.0104	29.4264	31.2431	22.0258	22.0969	23.5357
Adamts6	9.96425	8.99445	11.7865	9.34481	9.69414	10.5704
Adamts7	2.70804	2.70768	2.63878	4.63941	4.52307	4.34979
Adamts8	9.04624	9.16917	9.64479	6.53139	5.75272	6.23857
Adamts9	4.89536	4.39068	4.72585	1.57658	1.81269	1.57427
Adamtsl1	5.40988	5.38151	5.08927	3.34843	3.69568	3.57112
Adamtsl2	0	0	0	0	0.00603267	0.00615038
Adamtsl3	23.61	21.7216	22.9292	26.5573	27.6236	27.2253
Adamtsl4	38.7787	38.5119	38.4824	23.0662	23.7536	22.3253
Adamtsl5	1.93655	2.04227	2.43529	2.45552	2.20005	2.16908
Adap1	0.129053	0.0671176	0.106135	0.229907	0.431544	0.11154
Adap2	0.341025	0.45756	0.215363	0.363454	0.328174	0.260226
Adar	6.80027	6.38984	6.28148	6.06198	5.96181	5.81608
Adarb1	3.0864	2.92618	2.75337	2.97096	2.97935	2.85231
Adarb2	0	0	0.00560661	0	0	0
Adat1	1.04059	0.745636	0.787876	0.630297	0.660233	0.683013
Adat2	1.44128	1.3789	1.64469	1.07359	1.08609	1.20091
Adat3	1.29894	1.44506	1.92378	1.69314	1.33114	1.19931
Adck1	2.2169	3.02806	2.39852	1.78563	2.39082	1.99544
Adck2	3.47382	2.98653	2.83554	3.09419	2.89161	3.1424
Adck5	2.48321	2.11264	2.48054	2.3288	2.10907	2.16883
Adcy1	0.0735577	0.0146067	0.0523101	0	0.00727519	0.0890056
Adcy10	0.116682	0.137403	0.192971	0.0960288	0.187866	0.153225
Adcy2	3.84752	3.64394	3.91907	2.52689	2.933	2.56597
Adcy3	13.1952	13.1159	12.9937	8.54157	8.81932	8.97645
Adcy4	2.9298	3.33367	2.66694	4.33212	4.26963	4.66666
Adcy5	0.170419	0.212335	0.176527	0.0946032	0.132198	0.134777
Adcy6	20.1673	19.9392	19.6774	15.2572	16.452	15.8526
Adcy7	4.82819	4.9148	4.57484	5.26984	5.26198	4.99593
Adcy8	0.416852	0.403662	0.292782	0.733695	0.834751	0.664225
Adcy9	2.01163	1.68838	1.79297	2.29705	2.2761	2.12307
Adcyap1	0	0.00483933	0.00495166	0	0	0.0196589
Adcyap1r1	0.506116	0.621524	0.627832	0.188536	0.173883	0.220251
Add1	102.938	106.837	102.783	84.254	82.3482	81.5542
Add2	0	0	0	0.0101146	0	0
Add3	16.4974	16.1372	15.4683	5.59989	5.51347	5.37923
Adgb	0.0595037	0.0379797	0.0518151	0.0472725	0.0882778	0.0600001
Adgra1	0	0	0.0256015	0	0	0
Adgra2	49.763	51.8018	47.6099	70.5339	70.3324	68.6632
Adgra3	13.7952	12.3569	12.9799	17.7025	17.5706	17.8817
Adgrb1	0.088452	0.04582	0.0468835	0.0116654	0.0456433	0.0387782
Adgrb2	0.0341	0.067714	0.0649554	0.0861975	0.0252949	0.120346
Adgrd1	0.393528	0.304534	0.41743	0.0526634	0.0944424	0.125462
Adgre1	0.401079	0.383739	0.540815	0.766831	0.73567	0.904441
Adgre4	0	0.0274884	0	0	0.0205368	0.00697918
Adgre5	6.40286	6.45103	6.04702	3.79917	3.90314	4.20647
Adgrf2	0.011472	0	0	0	0	0
Adgrf3	0.0143809	0.0856707	0.0219148	0	0.0142234	0.00725046
Adgrf5	0	0.00486789	0.00498088	0.00247866	0.0169719	0.00247187
Adgrg1	0.190621	0.276221	0.298334	0.734493	0.484071	0.488321
Adgrg2	0.0492475	0.112462	0.0350221	0	0.0194832	0.00496584
Adgrg3	0	0	0	0	0.0324248	0
Adgrg5	0.0222623	0.0442073	0.0316634	0.0585253	0.101285	0.0359169
Adgrg6	10.3353	9.41083	10.8464	7.62724	7.04779	7.71917
Adgrg7	0.00568095	0.00282023	0.0259713	0.0258484	0.0337123	0.0400985
Adgrl1	1.27799	1.5057	1.60348	3.11139	3.04058	2.9455
Adgrl2	11.2054	11.2225	10.9327	15.922	15.7479	16.4917
Adgrl3	0.0442684	0.0199786	0.0408846	0.0664623	0.0663386	0.0919807
Adgrl4	0.311556	0.397716	0.19217	0.303767	0.121056	0.224396
Adgrv1	0.0048879	0	0.00993143	0.00741333	0.00241718	0.00123217
Adh1	0.327772	0.390523	0.372948	0.0132566	0.0389017	0.185083
Adh5	41.6033	44.5781	42.0749	34.4362	34.6133	30.09
Adh7	13.9683	12.4284	13.3468	0.473149	0.555388	0.377482
Adhfe1	1.35525	0.69202	1.25881	0.489398	0.497866	0.663758
Adi1	10.0605	9.50724	11.2975	7.26597	8.20903	7.26417
Adig	12.3297	13.5126	12.0493	4.74513	3.88204	5.46346
Adipoq	0.0453316	0	0.0153511	0.229177	0.014945	0.0304732
Adipor1	87.3241	90.7351	87.1168	87.1531	86.1283	81.944
Adipor2	16.5862	15.2224	17.0312	18.0893	17.6734	18.0829
Adissp	4.67108	4.69788	4.6122	4.97801	4.6698	4.75582
Adk	26.7521	29.166	26.5323	15.0729	15.064	14.4956
Adm	146.576	143.972	150.054	81.9046	84.963	82.5926
Adm2	0.288759	0.286701	0.361053	3.63837	3.91046	3.80758
Adnp	6.43976	5.91734	6.51821	6.88805	6.64403	6.73705
Adnp2	5.13588	5.49752	5.44353	5.38692	5.44614	5.76782
Ado	5.81322	5.67123	5.84403	5.63206	6.31047	6.1885
Adora1	0.292696	0.230778	0.231762	0	0.0255432	0
Adora2a	0.0861299	0.0594894	0.102719	0.0151456	0.0259263	0.0377602
Adora2b	7.17288	6.08795	5.56325	3.93824	3.53444	4.17372
Adora3	0.00932948	0	0.037912	0.0377326	0	0
Adpgk	37.7786	36.5235	36.4633	22.5357	22.0975	23.1476
Adprh	19.347	22.4085	21.8816	19.7994	21.9092	19.9951
Adprhl1	0.00300123	0.00893952	0.00609802	0	0.0133576	0.00151314
Adprm	9.24157	11.2986	9.83748	11.5419	10.1889	11.2252
Adprs	21.589	19.8687	19.9256	20.4206	20.7199	21.1815
Adra1a	0.00381046	0.00189165	0	0.00770562	0	0.0134479
Adra1b	3.25129	3.7436	3.2771	1.13597	1.01858	1.31308
Adra1d	0.209613	0.240137	0.171998	0.586918	0.621951	0.406465
Adra2a	5.72301	6.05152	5.65094	4.27372	4.67374	4.28758
Adra2b	0.21648	0.220746	0.184262	0.106485	0.0462937	0.106193
Adrb1	0.0157226	0	0.0159729	0	0	0
Adrb2	1.22853	1.565	1.35406	0.164062	0.492908	0.198673
Adrb3	0.343795	0.417199	0.498955	0.253815	0.188905	0.165078
Adrm1	46.1642	52.3291	47.0001	48.6194	50.5061	49.0705
Adsl	19.3544	21.2006	18.9119	15.0996	15.908	15.2536
Adss	40.7071	39.3522	41.0804	42.2816	41.5064	48.2969
Adss1	0.690615	0.404069	0.451034	0.23692	0.0975785	0.174094
Adtrp	0.033826	0.13434	0.0343645	0.136808	0.100366	0.187595
Aebp1	271.504	279.269	266.941	334.846	346.267	326.745
Aebp2	5.57588	5.06098	5.51128	4.62134	5.06053	5.34063
Aen	25.0585	24.0499	23.4627	19.5482	19.833	18.1715
Afap1	28.1516	26.0441	25.8669	38.4577	38.8858	37.428
Afap1l1	0.0519259	0.0670226	0.0580278	0.157509	0.0616285	0.0733028
Afap1l2	3.58554	4.50217	4.02363	5.22263	4.77706	5.41459
Afdn	8.74331	8.09658	8.06148	8.3547	8.09999	8.29973
Aff1	11.1761	10.1948	10.3179	10.9206	11.6409	11.272
Aff2	1.30976	1.25779	1.25305	0.993838	0.915517	1.11861
Aff3	2.52862	2.48103	2.27644	2.18287	2.0567	2.08681
Aff4	13.2032	12.8163	13.7645	17.8186	17.4958	19.4403
Afg1l	0.746393	0.793384	0.744894	0.435055	0.534122	0.593242
Afg2a	0.349951	0.337993	0.42054	0.50942	0.641059	0.608256
Afg2b	1.5406	1.40153	1.52658	1.22776	1.15593	0.987171
Afg3l1	12.8698	14.4587	13.5839	15.5466	16.3109	14.6268
Afg3l2	7.40476	6.35187	7.04053	6.40066	6.36723	6.55015
Afmid	1.49547	1.5178	1.18166	1.49528	1.61056	0.938276
Aftph	6.42655	6.49596	6.07414	7.55955	7.42735	7.39954
Aga	48.1529	49.2239	50.8488	41.4715	43.3991	46.0527
Agap1	1.99713	2.0904	1.98367	2.95525	2.91926	2.9771
Agap2	0.00399497	0.055531	0	0.0161575	0.00395121	0
Agap3	4.22973	4.44595	4.50013	4.66236	4.30383	3.93142
Agbl1	0.00524551	0	0	0	0	0
Agbl2	0.230333	0.320168	0.28665	0.192136	0.159467	0.0870954
Agbl3	0.215901	0.226085	0.253609	0.172252	0.215204	0.306143
Agbl4	0	0	0	0.00834194	0	0
Agbl5	0.294627	0.307154	0.339227	0.86888	0.762497	0.960576
Ager	0.139038	0.414142	0.776884	0.25305	0.673825	0.322456
Agfg1	12.3049	12.5689	12.0974	10.351	10.3456	10.8215
Agfg2	3.28518	3.47661	2.94444	3.28854	2.74982	3.2068
Aggf1	4.77789	4.83784	6.19322	4.67633	4.78318	4.8104
Agk	7.76529	6.96878	7.53747	7.11521	7.19402	6.66428
Agl	6.68706	6.80111	6.89966	4.79449	4.29168	5.06024
Agmat	0.114873	0	0.0145877	0.0290374	0.0852111	0.0868736
Agmo	1.20349	1.53632	1.30998	0.975424	0.944689	0.866809
Ago1	3.93422	3.84637	4.28027	5.00688	5.10141	5.04431
Ago2	7.79152	7.61779	8.4151	6.93085	7.02872	7.55904
Ago3	1.25824	1.12146	1.34999	1.16446	0.859759	1.07333
Ago4	0.661503	0.628386	0.795542	0.459159	0.470357	0.533617
Agpat1	39.8416	42.9131	39.1764	39.4026	41.1375	37.0595
Agpat2	5.76661	6.13046	5.55916	6.00252	5.93875	5.63194
Agpat3	3.96423	3.95999	4.23449	4.80854	4.86084	4.24474
Agpat4	8.61552	9.44245	8.90239	8.07269	7.56857	7.16432
Agpat5	5.25437	5.11333	5.40616	4.40847	4.87616	4.7759
Agps	13.7483	13.1198	15.788	12.6517	13.4105	15.6253
Agr2	0	0	0	0.0810884	0	0
Agrn	2.83703	2.67107	2.90534	2.40795	2.69081	2.59785
Agrp	0.0432874	0.0429789	0.0439765	0.0218842	0.107033	0.0436486
Agt	0.091776	0	0.0372948	0.0556776	0.0907707	0.00925417
Agtpbp1	3.91975	3.89842	3.89088	3.91284	3.50164	3.94239
Agtr1a	15.7939	15.0285	16.5849	5.11431	4.90889	4.97279
Agtrap	14.0796	14.3533	14.0465	13.2971	13.1611	12.632
Agxt	0	0.0550573	0	0	0	0
Ahctf1	7.85462	7.46354	7.92865	7.61758	6.47473	7.98203
Ahcy	40.6229	44.7827	39.5742	44.5434	40.8935	37.6552
Ahcyl1	189.625	184.601	195.881	83.9587	82.7511	86.437
Ahcyl2	2.94452	3.30602	3.09989	3.0081	2.76892	2.8614
Ahdc1	9.19087	8.87689	8.06598	7.04688	7.14398	7.07942
Ahi1	7.88256	6.71612	8.08874	6.03631	6.2974	6.71602
Ahnak	123.62	111.524	126.639	104.844	98.8975	110.547
Ahnak2	4.30081	3.98536	3.93575	4.83702	4.68882	5.12542
Ahr	11.9604	11.6388	13.5645	15.5644	15.8993	17.7326
Ahrr	10.6083	9.85654	9.75736	3.39688	3.45246	4.23192
Ahsa1	55.5969	60.3641	59.6762	48.7566	52.1581	51.9587
Ahsa2	2.71925	3.50068	3.79264	3.78635	4.21653	4.85648
Ahsp	0.317993	0.558592	0.298204	0.61832	0.556439	0.690621
Aicda	0.0186296	0.0184968	0	0	0.0737021	0.0751401
Aida	55.1491	52.8921	56.9678	41.9606	44.5354	46.7252
Aif1	0.974986	0.898891	0.972819	1.88362	1.63588	1.43957
Aif1l	4.67546	5.17836	4.20123	3.47926	3.78486	3.35303
Aifm1	14.0719	13.7113	15.1868	13.4638	12.7513	13.4269
Aifm2	20.9973	22.3702	21.4187	18.2922	18.6354	18.3664
Aifm3	0.0289067	0.0322883	0.0367086	0.0730699	0.0536064	0.0728697
Aig1	3.00432	2.86153	2.92531	3.42433	3.32901	3.32577
Aim2	0.00632037	0.00418355	0.00428066	0.010651	0	0
Aimp1	29.2998	27.1486	28.0758	26.215	25.376	29.2722
Aimp2	32.129	30.871	30.3322	30.2693	30.0226	27.4933
Aip	28.4581	30.6366	27.1139	27.7596	26.1611	25.6939
Aipl1	0	0	0.0609377	0	0	0
Aire	0	0.00872336	0	0	0.00868974	0
Airim	1.1889	1.2185	1.28575	1.12455	1.30484	1.49272
Ajm1	0.389804	0.490862	0.367033	0.389329	0.362026	0.335536
Ajuba	9.54011	9.06503	8.94072	16.9159	16.2208	16.6924
Ak1	32.4408	33.3855	32.8105	36.1408	34.5997	33.6824
Ak2	36.5436	36.7092	36.0922	27.243	27.2943	27.9115
Ak3	60.8101	62.9737	61.786	61.0904	60.3868	59.4767
Ak4	3.20615	3.59556	3.55621	7.57302	7.28817	7.15478
Ak5	0.054397	0.246899	0.173683	0.0314294	0.13066	0.117537
Ak6	7.25584	4.70669	6.06908	5.38008	7.10459	5.4385
Ak7	0.25557	0.102871	0.140345	0.0698406	0.116138	0.222878
Ak8	0.00858996	0	0.0109084	0	0.0169917	0
Ak9	0.00687222	0.0307046	0	0.00347429	0.0135939	0.0173239
Akain1	0	0.0099532	0	0	0	0
Akap1	13.8847	13.155	13.8528	14.1315	13.1797	13.5803
Akap10	2.35353	2.15324	2.54372	2.30493	2.74455	2.81549
Akap11	5.90669	5.49817	5.92321	5.66197	5.60332	6.29053
Akap12	225.101	217.04	227.646	174.299	168.418	176.943
Akap13	5.31147	4.98088	5.76584	3.5636	3.28795	3.91786
Akap14	0	0.0126191	0	0	0	0.0384473
Akap17a	11.9436	10.5639	13.0997	10.1753	11.3781	11.3096
Akap17b	0.328121	0.290371	0.405811	0.274069	0.439169	0.32906
Akap2	39.9679	36.6826	38.7128	35.7421	36.2247	38.7272
Akap3	0.0886825	0.101597	0.0762336	0.0620779	0.040482	0.0894223
Akap5	0.460382	0.325561	0.407144	0.720016	0.625682	0.824915
Akap6	0.11465	0.0715105	0.0895965	0.114438	0.0494283	0.0844819
Akap7	4.18835	3.80373	3.77714	3.4117	3.20304	3.07854
Akap8	8.4872	7.64949	9.59695	8.26016	8.32437	8.43931
Akap8l	8.94484	8.88707	10.2132	7.24148	6.90472	7.65895
Akap9	2.31302	2.05324	2.90422	2.08977	2.24553	3.01506
Akip1	14.7707	14.4788	14.4204	14.7448	14.0141	15.8414
Akirin1	22.1271	20.774	21.2783	26.0142	28.1391	27.6272
Akirin2	25.5341	24.5579	23.6326	24.6046	25.4917	24.7953
Akna	1.00703	1.25623	1.40672	2.712	3.0327	2.63623
Aknad1	0	0.0030901	0	0.00314687	0.00615637	0
Akr1a1	460.672	497.268	441.515	430.276	419.782	395.179
Akr1b1	328.383	349.464	317.136	174.116	169.336	158.589
Akr1b10	0.563241	0.0986871	0.280494	0.223334	0.207536	0.233858
Akr1b7	0	0	0.00484007	0	0	0
Akr1b8	302.452	290.471	301.864	53.5004	51.4601	54.4358
Akr1c1	0.0763198	0.151552	0.0969185	0.077168	0	0.0384783
Akr1c12	1.53704	1.50677	1.10689	1.47543	1.75112	0.745505
Akr1c12l1	0.0584647	0.0773974	0	0	0	0
Akr1c13	0.122004	0.0745445	0.0953435	0.0474462	0.064975	0.0946324
Akr1c14	64.0386	64.7196	65.3074	38.3062	37.2982	39.5007
Akr1c15	3.96712	4.39809	5.09659	2.7341	2.88557	3.01362
Akr1c19	0.0323414	0.070644	0.0438083	0.0283407	0.0213248	0.0869633
Akr1c2	0	0.0156625	0	0	0	0.0159066
Akr1c3	0.0784697	0.136343	0.179367	0.0991771	0.116415	0.0395622
Akr1d1	0.00692548	0	0.00703573	0	0	0
Akr1e2	13.7004	11.6788	14.1775	9.28093	9.46505	8.98126
Akr7a2	42.2934	48.4741	38.3838	33.3331	32.681	26.8506
Akr7a3	0.443967	0.264481	0.165379	0.0748167	0.0292736	0.0746118
Akt1s1	27.2401	30.9274	27.1148	31.5347	32.5458	31.0979
Aktip	14.9724	16.1681	16.8959	15.8951	17.8	16.0921
Alad	10.2038	11.418	9.26376	11.1249	9.70443	10.5777
Alas1	19.2702	20.7915	18.9967	22.6555	19.5388	19.0615
Alas2	0	0	0	0.0110482	0	0
Albfm1	0.179892	0.104189	0.258903	0.181891	0.155681	0.0453481
Alcam	55.2942	51.4123	56.8882	31.4482	32.5726	36.9683
Aldh16a1	11.9657	12.1012	12.1951	13.1301	13.2532	13.3803
Aldh18a1	35.2542	36.4346	34.4617	51.9109	52.0284	50.5422
Aldh1a2	2.6696	1.86483	2.67994	7.63904	7.6393	8.47994
Aldh1a3	0	0	0	0.0129623	0.0126794	0.0452437
Aldh1b1	0.021555	0	0.0109491	0.0108973	0	0.0108674
Aldh1l1	4.98068	4.95129	4.53458	2.90708	2.55744	2.84324
Aldh1l2	16.1012	16.0923	15.3188	41.0333	39.1948	40.9335
Aldh2	143.664	154.141	138.039	115.316	116.116	107.253
Aldh3a1	256.484	268.611	245.068	11.7403	11.1973	10.5109
Aldh3a2	26.7212	25.4648	25.6343	17.1286	15.4258	16.3046
Aldh3b1	2.99474	2.6263	1.77573	2.75703	3.48056	3.14897
Aldh3b2	0	0	0	0.0104914	0	0
Aldh4a1	19.9507	21.9661	18.5281	25.2079	23.6875	22.3845
Aldh5a1	1.51175	1.488	1.38976	0.854577	0.732512	0.751197
Aldh6a1	27.9587	24.5082	28.2951	17.8172	18.2821	19.6819
Aldh7a1	18.9101	19.2375	17.6832	17.2152	16.4035	15.7653
Aldh8a1	0.792005	0.596549	0.679759	0.538473	0.324136	0.729767
Aldh9a1	84.3107	84.0815	85.3547	91.1306	89.1717	87.5241
Aldoa	1.79425	2.43856	1.76305	3.22688	2.15279	1.48297
Aldob	0	0	0	0.0153274	0	0
Aldoc	19.4548	20.2975	14.7283	19.5953	20.6489	21.2481
Alg1	7.51855	7.54273	7.33324	7.50972	7.62984	6.09398
Alg10	6.70982	6.18082	7.39157	4.85909	4.75304	5.70332
Alg11	3.41296	2.62733	3.63241	3.90174	3.16126	3.71877
Alg12	5.68999	5.8855	5.11422	5.26411	4.32211	4.54698
Alg13	1.50784	1.09745	1.55132	1.28557	1.17537	1.22407
Alg14	10.7744	12.4595	12.3366	13.7394	13.1512	14.9671
Alg2	16.7744	17.5563	18.2422	19.6359	20.2912	20.253
Alg3	21.3422	23.6199	21.4721	19.3941	19.741	17.6745
Alg5	26.3076	27.351	25.7576	23.0597	26.1407	26.1974
Alg6	2.12194	2.24205	2.11202	1.50766	1.5882	1.58304
Alg8	10.0654	9.89816	9.40062	6.67679	7.53503	6.72314
Alg9	15.804	15.9065	13.8087	11.6588	11.6187	11.1842
Alk	0	0	0.00215316	0.00214298	0.0125773	0
Alkal1	0.66582	0.537123	0.422762	0.925676	1.76979	0.965101
Alkbh1	3.18403	3.14128	3.32093	2.83946	2.56169	3.17393
Alkbh2	2.52819	2.51017	2.28093	2.40367	2.51916	1.7883
Alkbh3	8.74829	9.56889	9.65879	8.4873	8.91704	8.49321
Alkbh4	1.87797	2.02106	1.24078	1.67311	2.26005	2.03931
Alkbh5	9.87604	11.172	9.34793	12.0184	13.731	12.7065
Alkbh6	9.89846	9.80511	9.5894	10.0549	9.94903	9.35578
Alkbh7	12.0955	13.9761	13.5192	9.68494	9.75017	10.4339
Alkbh8	2.41869	1.45802	2.5547	2.0865	2.28778	2.54533
Alms1	1.61096	1.35809	1.57432	1.35098	1.53059	1.67344
Alox12	0	0	0	0.00620886	0	0
Alox15	0.0384491	0.012725	0.0130204	0.0647939	0.145774	0.0258466
Alox5	0.22201	0.245862	0.355666	0.189942	0.101344	0.0774908
Alox5ap	5.28148	5.87109	6.34111	2.98948	2.19942	2.34426
Aloxe3	0.129248	0.147576	0.12474	0.0718763	0.0383496	0.0456142
Alpg	0	0.00839024	0.00643875	0.00427219	0.0208948	0.00639073
Alpk1	1.43733	1.46984	1.3563	1.85609	2.04186	1.89443
Alpk2	0.100717	0.0999991	0.168333	0.151112	0.128534	0.134318
Alpk3	0.0766404	0.0434824	0.107522	0	0	0.00367999
Alpl	6.17048	6.44712	5.30224	25.371	23.7814	23.6294
Als2	3.46087	2.94628	3.98269	4.13589	4.07255	3.99073
Als2cl	2.69935	2.34259	2.31148	0.619378	0.958724	0.655014
Alx1	0.161076	0.373166	0.190914	0.190011	0.26552	0.392515
Alx4	0.0813219	0.161485	0.123925	0.164451	0.160862	0.0683336
Alyref	34.4264	35.5611	36.7149	30.4129	28.2305	29.6614
Amacr	8.62542	8.05221	8.99373	8.32276	8.27606	8.63624
Ambp	0	0	0	0.018675	0	0
Ambra1	7.96377	7.84893	8.03961	7.40589	7.01284	6.38288
Amd1	12.6498	11.4988	13.2155	16.4318	16.1471	15.9498
Amdhd2	8.54118	11.4529	9.40282	14.9057	13.8589	15.4779
Amelx	0	0	0	0	0.0698375	0.0237334
Amer1	2.97351	2.95874	3.11936	2.88891	2.65963	2.9918
Amer2	0	0	0	0.0092895	0.00908676	0.00463202
Amfr	70.3159	71.7548	71.8819	80.8488	80.4509	73.7735
Amh	0.0273737	0.0271786	0	0.0415168	0.0135369	0.124209
Amhr2	0	0.00741156	0	0	0.014766	0.0301082
Amigo1	0.757289	0.69118	0.726338	0.375719	0.539648	0.455319
Amigo2	8.4789	8.19073	8.443	7.8078	8.37089	7.51659
Amigo3	4.37279	4.00292	3.57598	4.31164	4.55494	4.84708
Ammecr1	3.33319	3.25793	3.68052	3.59317	3.47199	3.89719
Ammecr1l	7.63017	7.48335	7.15507	8.23267	7.70948	8.82389
Amn	0.0807671	0.0801914	0	0	0.0133137	0.0407205
Amn1	5.91955	6.10937	6.40943	4.90903	4.26264	4.30654
Amot	13.5269	12.0705	13.8075	13.4114	13.8414	15.0056
Amotl1	18.6202	18.1975	17.9041	15.3167	15.4842	15.2463
Amotl2	67.9517	67.5793	67.9281	73.3802	74.5758	72.3835
Ampd1	0.0103196	0.010246	0.0104838	0.0104342	0.00510326	0
Ampd2	9.23774	10.0104	9.6549	7.73271	7.98159	7.30151
Ampd3	1.43618	1.44248	1.47173	1.07753	1.01696	0.784945
Amph	13.1524	13.019	14.0913	7.71152	6.70143	7.17413
Amt	0.445265	0.245607	0.472458	0.420199	0.332737	0.638549
Amy1	0	0	0	0	0	0.0145673
Amz1	2.84894	2.8163	2.68485	2.7048	2.53768	2.47699
Amz2	13.7207	13.7799	14.5356	14.9691	14.9699	14.3816
Anapc1	13.4233	12.6893	13.1731	11.7721	11.3789	11.745
Anapc10	6.75785	6.32652	6.32526	5.68835	6.01375	6.19161
Anapc11	13.8659	14.5095	12.3187	12.2039	12.3799	11.3389
Anapc13	38.9387	42.8144	39.7159	33.1576	33.6087	32.8064
Anapc15	10.6278	10.3345	10.2776	14.5002	11.3061	12.7665
Anapc16	10.8327	11.6276	12.3808	15.9856	14.9671	12.639
Anapc2	48.848	53.3833	46.5409	40.1985	41.7886	39.6587
Anapc4	15.8625	15.7184	17.6688	13.7349	14.2501	14.6729
Anapc5	121.413	129.951	119.941	132.955	128.923	122.279
Anapc7	2.85992	2.69726	3.0882	2.9472	2.82558	2.90838
Ang	3.86219	4.12964	3.74258	2.88378	2.46823	2.81596
Ang2	0	0	0.0348121	0	0	0
Angel1	1.30756	1.19476	0.97703	1.47059	1.40569	1.34713
Angel2	3.51693	3.15187	3.63565	4.09807	4.07803	4.43496
Angptl1	0.0522237	0.124444	0.10611	0.0211216	0.0516516	0.0105319
Angptl2	27.0259	28.2467	26.0663	29.1704	30.1948	29.3148
Angptl4	4.36668	3.89864	4.22986	8.73629	8.328	7.38971
Angptl6	0.0139284	0.0553164	0	0.0422495	0	0.0561783
Angptl7	0.0414136	0.0205592	0.0420729	0.0104685	0.0511999	0.0626386
Angptl8	2.1305	1.44591	2.60278	4.47196	4.02761	4.24216
Anhx	0	0	0	0.0123664	0	0
Ank1	0.0349163	0.0321912	0.0202698	0.0327826	0.0098668	0.0352076
Ank2	2.10747	2.0885	2.06826	1.86537	1.76432	1.96323
Ank3	0.807046	0.726312	0.725995	0.417125	0.452613	0.487585
Ankar	0	0.00923025	0	0.00939983	0.00459734	0.00468704
Ankdd1a	0.16092	0.139801	0.0934181	0.107504	0.0937891	0.170955
Ankdd1b	0.00501445	0.00124468	0.00509427	0.00126754	0.00991903	0.00632035
Ankef1	0	0	0	0.032529	0.00795477	0.0324399
Ankfn1	0.00591069	0.01027	0.0135108	0	0	0
Ankfy1	14.345	13.2499	14.8546	11.8684	11.4092	11.8419
Ankh	22.2455	20.924	20.5147	28.1795	26.5497	26.1404
Ankhd1	7.89852	7.35746	7.43432	6.17229	6.3576	6.73509
Ankib1	6.1198	5.55646	5.8282	6.74194	7.35921	6.92185
Ankle1	0.666863	0.52606	0.807407	0.415649	0.496928	0.405298
Ankle2	6.67623	6.18654	6.81308	4.35933	4.68972	5.28179
Ankmy1	0.0424581	0.0354994	0.0681063	0.0948978	0.0751454	0.101398
Ankmy2	17.4764	17.245	15.5057	15.4051	14.5016	17.3239
Ankra2	6.10688	6.13775	6.86384	6.50306	6.89225	6.9008
Ankrd1	0.603191	0.411005	0.252327	2.54721	2.81915	2.2063
Ankrd10	1.53039	1.0813	1.57483	1.60068	1.90886	2.04352
Ankrd11	8.79249	8.46196	8.49933	8.5623	8.61184	9.36059
Ankrd12	3.05447	2.56364	3.49615	3.64638	3.595	4.25854
Ankrd13a	30.2086	31.1778	30.4169	31.7275	31.7577	29.5914
Ankrd13b	9.43676	9.28381	9.58699	8.02166	7.94619	7.30343
Ankrd13c	10.7875	9.80709	9.42024	7.69804	7.66724	8.76247
Ankrd13d	2.53423	2.39738	2.99446	2.39744	1.80724	2.24829
Ankrd16	2.15257	2.47007	2.25853	2.78305	2.33839	1.79691
Ankrd17	16.8884	16.4041	16.7225	15.1369	14.491	14.564
Ankrd2	0	0	0	0.128717	0.0209846	0
Ankrd22	0.0146433	0	0.0743821	0	0.0144829	0.0295309
Ankrd23	0.278875	0.0346109	0.0885357	0.10574	0.155149	0.0351502
Ankrd24	3.56845	3.90095	3.74203	2.73117	3.01779	2.57091
Ankrd26	0.692822	0.812648	1.16964	0.566598	0.675156	0.691753
Ankrd27	5.30104	5.1557	5.15468	5.50482	5.21532	5.25365
Ankrd28	14.2265	12.7498	14.0992	5.48781	6.01098	6.14647
Ankrd29	1.35891	1.29657	1.49503	1.82978	1.5276	1.73119
Ankrd33	0	0	0.0201046	0.040019	0	0
Ankrd33b	0.0692112	0.0607889	0.108174	0.0430648	0.0289609	0.0429469
Ankrd34a	0.670426	0.569835	0.454066	0.308126	0.658058	0.384102
Ankrd34c	0	0	0	0	0.00944308	0
Ankrd35	0.00698473	0	0	0	0.0138164	0
Ankrd36	0.26721	0.298768	0.322822	0.240971	0.142856	0.172344
Ankrd37	1.74633	1.60639	1.69586	2.72651	3.04801	3.23695
Ankrd39	0.647979	0.705909	1.2343	0.664279	0.667584	0.807656
Ankrd40	38.9389	37.7721	38.5778	29.0636	27.1351	29.1321
Ankrd40cl	0	0.00363924	0.00744742	0	0	0
Ankrd42	3.11984	2.59482	3.19316	1.93626	2.35455	2.82307
Ankrd44	5.94397	5.64515	5.75378	1.53197	1.72596	1.83904
Ankrd45	0.417135	0.327878	0.429662	0.708809	0.790751	0.946385
Ankrd46	14.5696	15.0074	15.2416	12.498	12.8812	11.6817
Ankrd49	8.16908	6.79758	7.49476	5.98063	6.89115	6.99742
Ankrd50	10.6825	9.61922	9.95243	7.99524	8.28929	7.96449
Ankrd52	18.7776	19.4628	17.3223	18.1663	16.788	16.5234
Ankrd53	0.0292866	0	0	0.0444181	0.0144829	0.0590619
Ankrd54	3.47391	3.47155	3.53685	3.10956	2.96733	2.73711
Ankrd55	0.139223	0.130956	0.123574	0.0488992	0.101462	0.0842309
Ankrd6	0.243862	0.312418	0.301022	0.246572	0.256751	0.227388
Ankrd60	0.0167337	0.0387671	0.0340002	0.0789585	0.0662017	0.0562444
Ankrd61	0	0	0	0	0	0.0329548
Ankrd63	0.00490944	0	0.0199504	0.004964	0.00485566	0.00990079
Ankrd66	0.0429732	0	0.0109143	0.11949	0.138133	0.108329
Ankrd7	0.0031736	0.0126039	0.00322412	0	0.0156942	0
Ankrd9	1.16934	1.25118	1.28023	1.91699	2.39541	2.01858
Anks1a	1.95091	1.88925	1.85437	1.96449	2.06435	1.89713
Anks1b	0.0374406	0.0332607	0.0340328	0.0498114	0.070163	0.0973629
Anks3	4.79442	5.11146	4.45056	4.97976	5.58694	4.98258
Anks4b	0.326192	0.224216	0.331385	0.228335	0.115812	0.0843369
Anks6	3.32617	3.2492	2.96292	5.07429	4.66447	4.25387
Ankzf1	6.5081	6.91903	6.79368	6.40794	6.79113	5.25508
Anln	14.0563	13.5359	14.1851	6.32498	7.61806	7.83617
Anlnl1	3.20366	3.22668	3.28985	1.61088	1.8155	1.72287
Ano1	0.024634	0.0244584	0.00500524	0	0	0.00993582
Ano10	38.9377	38.9416	33.9776	33.9795	34.0941	30.9667
Ano2	0	0	0	0.00605497	0.00592282	0.00603838
Ano3	0.116436	0.0889275	0.230512	0.0362245	0.0590565	0.0963339
Ano5	0.121829	0.0537605	0.101765	0.0711726	0.0348096	0.030029
Ano6	38.2957	39.0493	38.3023	40.2004	38.7322	40.0439
Ano7	0.22452	0.162903	0.0965014	0.026194	0.128112	0.00870743
Ano8	9.36241	9.01651	10.0949	9.69026	8.69775	9.18716
Anos1	1.53755	3.25672	1.24962	0.103642	0.912422	0.723508
Anp32a	42.2146	39.163	44.1508	44.2387	44.2485	47.8462
Anp32b	120.493	109.87	125.584	99.409	103.269	116.881
Anp32e	17.1562	16.1605	18.7879	13.5072	12.8022	15.6696
Anpep	156.201	160.133	148.448	140.541	138.952	131.03
Antkmt	3.11678	3.61802	3.65475	3.74721	3.25134	2.93952
Antxr1	86.9767	85.1061	82.3385	96.4059	99.8204	95.9623
Antxr2	15.6727	15.0399	15.1145	16.9269	17.5434	18.0579
Anxa1	376.736	382.165	402.325	234.155	235.818	268.545
Anxa11	23.1958	24.9258	22.956	21.9625	21.7013	20.4639
Anxa13	0	0	0	0	0.014564	0
Anxa2	1661.62	1767.34	1680.32	855.94	828.157	810.329
Anxa3	4.02363	3.95199	3.50373	9.59904	9.45679	9.40447
Anxa4	72.8319	74.9169	75.4776	77.0117	75.0933	77.6647
Anxa5	344.413	375.822	355.216	254.474	252.1	243.292
Anxa6	142.9	158.765	143.922	167.943	167.427	159.704
Anxa7	41.7878	41.8686	42.5383	32.2946	32.0877	31.1677
Anxa8	0.549946	0.798816	0.67251	0.483976	0.684938	0.657225
Aoah	0.181815	0.154731	0.151726	0.0820696	0.105968	0.0982138
Aoc3	12.3172	11.5845	11.8657	27.213	26.2265	25.0523
Aopep	1.40028	1.59682	1.50971	1.38549	1.48674	1.50278
Aox1	23.9362	24.2675	25.9648	5.97336	6.10858	6.48261
Aox2	0.10013	0.115114	0.0321235	0.1119	0.0833967	0.308212
Aox3	0.717522	0.561408	0.788369	0.118287	0.127276	0.117963
Aox4	0	0	0	0.00491004	0.00480288	0.00979318
Ap1ar	7.32408	7.16546	8.05771	6.68299	8.4541	7.66438
Ap1b1	19.8061	21.5248	19.692	20.1706	19.2785	20.1038
Ap1g1	18.573	19.0704	20.1644	16.4879	16.0229	16.6639
Ap1g2	2.80825	3.47025	3.22241	1.97469	2.35787	2.58043
Ap1m1	29.2103	32.6362	27.0711	28.5584	26.9682	25.4987
Ap1m2	0	0	0.013499	0	0	0
Ap1s1	85.0995	86.5031	82.5994	67.513	69.3017	69.1126
Ap1s2	9.23941	8.59038	10.4191	3.98162	4.19276	4.17671
Ap1s3	1.84928	1.77	2.69785	3.20116	2.35578	2.70756
Ap2a1	42.0151	39.6951	37.6881	42.4891	37.8384	37.7502
Ap2a2	55.4418	57.0502	54.2185	54.3607	52.3851	49.8788
Ap2b1	36.14	35.2147	34.982	36.3066	35.3951	35.2737
Ap2m1	180.467	198.686	178.956	188.607	183.507	171.915
Ap2s1	157.896	167.002	158.882	159.371	157.501	144.492
Ap3b1	24.7243	25.1118	25.5197	24.6895	23.9046	25.5545
Ap3b2	0.0127131	0.0126225	0.0322888	0.0257088	0.0125739	0.0833248
Ap3d1	43.4149	45.8685	41.9488	42.9072	43.3949	40.0374
Ap3m1	14.1434	14.9703	14.5429	11.5047	11.0147	13.2486
Ap3m2	4.12033	3.41819	3.70704	3.5661	3.18023	3.42052
Ap3s1	51.2881	50.8525	56.5466	81.3971	87.7465	96.1253
Ap3s2	31.2538	29.8547	34.3046	32.7447	31.1423	30.8086
Ap4b1	7.22075	7.26061	9.35262	6.27017	6.11058	5.97474
Ap4e1	3.429	2.81964	3.78284	2.54687	2.69298	2.98161
Ap4m1	4.71595	4.43247	5.23567	4.2705	5.30279	4.79943
Ap4s1	7.48729	7.21923	7.77124	7.35186	6.33592	7.60427
Ap5b1	4.841	4.58802	4.74194	3.05419	3.79212	3.26098
Ap5m1	2.19053	2.26538	2.31025	1.99607	1.63335	2.1399
Ap5s1	3.2479	3.091	3.39083	3.72287	4.78147	4.43709
Ap5z1	5.77284	5.7507	5.28799	5.47581	5.75377	5.58945
Apaf1	4.82784	4.41379	4.29842	4.92485	4.79263	5.17801
Apba1	0.437563	0.402656	0.336107	0.568319	0.425733	0.606221
Apba2	0.12448	0.123593	0.0824748	0.415896	0.497818	0.469329
Apba3	13.5754	15.6058	13.4408	13.9932	15.4552	14.7432
Apbb1	17.4896	19.8467	17.0702	14.7056	14.3987	13.1588
Apbb1ip	12.5962	13.7455	13.0757	11.0622	10.0555	10.562
Apbb2	8.57044	8.4786	8.48774	5.93445	5.89245	6.13681
Apbb3	4.3332	3.63635	5.94889	2.21759	3.0116	2.71608
Apc	6.2825	5.7892	6.26963	6.61937	6.68749	7.41124
Apc2	1.08295	0.982679	1.08609	1.12307	1.13387	1.11999
Apcdd1	0.346173	0.591173	0.520492	0.273015	0.479333	0.488685
Apcdd1l	0.00737869	0.0293044	0.00749616	0	0.0291915	0.00744025
Apeg3	0.0508116	0	0	0	0	0
Apeh	17.5205	19.3771	17.0353	17.2792	16.5251	15.0677
Apela	0	0	0	0.274043	0.097477	0.149068
Apex1	32.1911	32.2405	32.9354	36.0806	33.5745	32.6013
Apex2	3.94637	3.9436	3.98324	4.02897	3.99156	2.93618
Aph1a	22.5439	23.7703	21.1923	23.386	24.3991	23.2075
Aph1b	0.423917	0.436063	0.27547	0.274167	0.460822	0.431304
Aph1bl1	0.267853	0.172864	0.435388	0.609367	0.503346	1.93113
Aph1bl2	1.03874	1.03979	0.890932	1.15359	1.11578	1.02595
Api5	38.2415	34.6341	39.5601	27.4217	27.9073	30.3844
Apip	16.4475	16.5072	16.4765	9.88546	11.1806	11.9892
Aplf	2.93304	2.49851	3.16846	2.49887	2.8508	2.90074
Apln	2.52942	2.23817	2.30796	2.95419	3.13294	2.73945
Aplp1	8.72303	8.38497	8.33764	17.4694	18.7076	16.1006
Aplp2	73.0454	73.0296	73.1399	108.151	105.899	109.882
Apmap	13.0505	13.245	12.2973	11.5364	11.886	11.9427
Apoa1	0	0.185114	0.135293	0.161584	0.131715	0.537138
Apoa2	0	0	0.0461711	0.0459527	0	0
Apoa5	0	0	0.0129817	0	0.0126383	0.0128849
Apobec1	1.89818	2.10488	2.14507	0.577939	0.645484	0.48173
Apobec3	9.08962	7.14259	7.84407	6.53754	7.18956	7.5577
Apobr	0.880516	0.557486	0.460231	0.277413	0.416503	0.283086
Apoc3	0.109116	0.361128	0.0739022	0.882631	0.287789	0.220053
Apod	0.386759	0.640003	0.174629	0.869015	0.765044	0.758305
Apoe	26.085	27.7088	27.7228	31.1882	34.2181	34.4039
Apoh	1.13738	0.821291	0.693293	1.02456	0.695407	0.938349
Apol11a	0.0515491	0.00853028	0.0960112	0	0.0169948	0.043316
Apol2	0.0794571	0.0364111	0.0620939	0.12978	0.157173	0.166403
Apol3	2.89341	1.89762	2.2518	1.12728	1.27333	0.990362
Apol9a	3.02388	3.68707	2.95525	1.73436	1.88015	1.7831
Apold1	0.660349	0.496822	0.591691	0.199062	0.271793	0.330861
Apom	0.746751	0.617857	0.537369	0.440445	0.707797	0.564736
Apoo	3.91627	4.73999	4.67803	3.69733	3.2706	3.82376
Apool	10.698	9.28419	12.4623	7.83623	8.7468	10.18
App	246.816	250.927	245.855	355.972	352.452	351.871
Appbp2	10.2574	9.86909	10.3156	11.107	10.6141	11.2852
Appl1	9.69927	9.22508	10.7192	9.04272	8.85327	10.2521
Appl2	8.54159	8.11293	9.74751	5.15547	6.27855	6.51091
Aprt	195.804	208.242	205.623	138.777	143.518	135.968
Aptr	0.52699	0.469107	0.461534	0.312358	0.413379	0.384797
Aptx	3.42001	2.74563	2.80936	3.37329	3.26859	3.37989
Aqp1	1051.27	1095.04	1035.99	338.801	332.362	325.726
Aqp10	0	0	0	0.040086	0	0
Aqp11	0.551083	1.11255	0.541194	0.501487	0.526879	0.555681
Aqp3	0.2894	0.0914257	0.13364	0.053203	0	0
Aqp7	0.13179	0.0654252	0.0334719	0.144359	0.347589	0.465112
Aqp9	0.00476231	0	0	0.00481524	0.00942029	0
Aqr	17.2854	15.6082	16.4028	17.3242	15.3884	16.0536
Ar	0.0114498	0	0.0232642	0.0463082	0.0396354	0.0461814
Araf	18.3375	19.303	18.1269	16.3596	16.6406	15.1726
Arap1	11.408	12.5259	11.3075	10.633	11.4582	10.1631
Arap2	0.0263411	0.0285309	0.041357	0.0750589	0.0947364	0.0386339
Arap3	0.00617988	0	0.0313913	0.00312428	0.0213927	0.0249258
Arc	0.286055	0.326619	0.138039	0.347081	0.339506	0.288442
Arcn1	83.4724	83.0201	87.3033	82.4286	78.5523	84.8449
Arel1	4.79849	4.57556	4.71527	4.95183	4.57327	4.88741
Arf1	228.397	240.784	233.59	219.189	216.284	204.96
Arf2	11.8676	12.7083	12.2981	18.1435	17.2679	19.0623
Arf3	68.9238	74.473	69.3343	68.729	68.2445	64.9719
Arf4	364.435	361.28	370.011	310.237	329.076	331.356
Arf5	90.1878	91.48	91.5325	87.9284	92.7891	83.0795
Arf6	59.4944	55.4078	59.9809	59.9263	61.105	58.8894
Arfgap1	31.2816	31.1656	32.0257	34.0241	32.8024	33.2659
Arfgap2	18.5859	22.8845	20.9888	17.903	19.1166	16.4543
Arfgap3	27.945	29.0534	28.0153	28.9125	27.1961	26.0712
Arfgef1	9.41463	8.86674	10.5484	7.95381	9.29847	9.53968
Arfgef2	8.24695	7.91971	8.10354	7.17667	7.44525	7.20881
Arfgef3	0.00284902	0	0	0	0	0
Arfip1	16.8095	16.3584	18.6141	16.6007	16.2726	19.2236
Arfip2	8.5296	8.39065	9.34146	9.1815	9.12266	9.17799
Arfrp1	15.1143	16.1454	16.1231	13.693	14.0244	13.7926
Arg1	5.55557	5.59206	6.3187	8.63903	8.74101	8.15176
Arg2	0.264561	0.180589	0.117588	0.501565	0.245309	0.233422
Arglu1	16.6185	15.2933	21.4332	16.8446	17.6654	20.1305
Arhgap1	13.9284	13.3889	13.2492	18.1863	17.4462	16.6737
Arhgap10	8.93176	8.90077	8.46122	6.58893	6.02214	6.59576
Arhgap11a	3.77034	3.56306	3.87652	2.08985	2.26326	2.64523
Arhgap12	2.42934	2.41649	2.5182	2.56531	1.93195	2.95674
Arhgap15	0	0.0162667	0.00416107	0	0	0.0247802
Arhgap17	13.0201	12.7787	13.3265	13.3556	14.3448	15.143
Arhgap18	2.31431	2.37565	2.55891	3.02239	3.39804	3.74272
Arhgap19	0.770315	0.862651	0.787127	0.674723	0.691004	0.460626
Arhgap20	0.724906	0.447569	0.495089	0.289489	0.265096	0.190416
Arhgap21	11.1366	10.2854	11.1436	12.0212	11.1416	12.1356
Arhgap22	4.63553	4.86179	4.53982	7.30563	6.97399	6.37492
Arhgap23	15.5347	15.2773	15.591	18.0638	18.025	18.1599
Arhgap24	1.68139	1.59047	1.59818	2.21147	2.2318	2.30093
Arhgap25	0.170159	0.110465	0.226057	0.595556	0.809109	0.653317
Arhgap26	0.0833973	0.0972606	0.110277	0.172664	0.149256	0.189543
Arhgap27	1.40357	1.68621	1.88221	0.912998	0.906954	0.688769
Arhgap28	25.5278	24.7355	25.4881	25.1794	26.3622	25.7721
Arhgap29	6.95171	6.087	6.92564	10.3529	10.2335	12.0923
Arhgap30	0.490072	0.486579	0.60924	0.867157	0.943897	1.30693
Arhgap31	15.9255	15.0397	15.4362	15.5991	15.5049	17.2976
Arhgap32	0.720112	0.794708	0.760523	0.864309	0.704538	0.762687
Arhgap33	0.438566	0.405261	0.524952	0.193182	0.270564	0.297736
Arhgap35	18.2817	17.7095	17.6251	19.8968	18.9881	19.7321
Arhgap39	0.887589	0.875789	0.744898	0.90024	1.01145	0.96726
Arhgap4	0.337375	0.21192	0.433678	0.396818	0.572022	0.36796
Arhgap42	2.94618	2.96905	3.43497	3.88257	4.39271	4.46129
Arhgap44	0.993455	1.3556	1.09023	1.45571	1.32411	1.29637
Arhgap45	0.284461	0.290865	0.211351	0.678274	0.663471	0.513734
Arhgap5	6.67124	6.05793	7.98144	7.11927	6.70609	8.15113
Arhgap6	1.34179	1.31237	1.34283	0.79663	0.753533	0.75412
Arhgap8	0.51345	0.347248	0.423347	0.120384	0.0441587	0.0225101
Arhgap9	0.183112	0.162999	0.224515	0.772508	0.636993	0.764024
Arhgdia	366.834	400.687	361.831	351.767	350.18	323.615
Arhgdib	4.91917	4.4659	4.73767	13.1267	14.6107	14.6228
Arhgdig	0.566882	0.584489	0.708808	0.0881818	0.107822	0.373746
Arhgef1	23.6446	24.6262	22.3558	21.7202	21.2272	20.3666
Arhgef10	11.6202	11.4512	11.6672	9.0362	8.40227	8.27318
Arhgef10l	7.68047	8.79596	8.2674	11.2094	10.5019	9.45097
Arhgef11	10.1709	9.37924	9.49234	9.82574	10.5925	10.1415
Arhgef12	13.2407	11.9442	12.9868	10.8453	11.5522	11.928
Arhgef15	0.00539613	0.00535767	0	0	0	0
Arhgef16	0	0.0206043	0.0562201	0.0629484	0.0547329	0
Arhgef17	14.1433	14.0723	13.8043	17.7254	18.1521	16.8706
Arhgef18	4.84247	5.06433	4.56739	5.22175	5.0728	4.5797
Arhgef19	3.01119	2.96956	3.12103	4.15367	4.53511	3.72243
Arhgef2	10.6021	10.8159	9.99928	19.2252	21.0857	20.6539
Arhgef25	39.0492	39.0873	41.5182	54.3336	52.4023	48.9896
Arhgef26	1.63484	1.67658	1.94496	0.989627	0.893565	1.0791
Arhgef28	0.533711	0.536253	0.639609	0.875706	0.818664	0.6864
Arhgef3	1.83556	1.85901	1.79467	2.66067	2.74365	2.88996
Arhgef33	0.080034	0.0765205	0.0451712	0.152855	0.114338	0.155426
Arhgef37	0.0790952	0.0499746	0.0584395	0	0	0.0145009
Arhgef38	0	0	0	0	0.00676747	0
Arhgef39	1.56297	1.72586	1.7956	1.15202	0.664569	1.03103
Arhgef4	0.0395536	0.0821135	0.0219181	0.0254502	0.0675715	0.112399
Arhgef40	12.4762	12.6761	12.3269	11.4345	11.3343	10.7088
Arhgef5	3.58071	3.30453	3.29092	6.37453	6.0244	5.85152
Arhgef6	14.7684	13.9315	13.8562	8.94815	8.3568	8.98824
Arhgef7	5.35687	5.59528	5.4146	5.77285	5.32014	5.28971
Arhgef9	1.32922	1.20261	1.29445	1.23266	1.23298	1.53462
Arid1a	10.4362	9.56117	9.46607	8.20942	9.06818	8.75779
Arid1b	4.10341	3.67933	3.82134	4.23866	4.86264	3.94864
Arid2	4.04289	3.64991	3.90273	4.6455	4.54139	5.12776
Arid3a	0.510621	0.603549	0.553333	0.698228	0.798424	0.711026
Arid3b	0.227568	0.0771525	0.214275	0.179588	0.192138	0.291031
Arid4a	2.77173	2.19962	3.14025	1.86392	1.84928	2.4065
Arid4b	4.30191	4.08758	5.56995	3.80053	4.17693	5.02042
Arid5a	0.718566	0.615712	0.755005	1.1595	1.10012	1.06203
Arid5b	11.0249	10.1781	10.6948	9.85379	10.3541	10.4397
Arih1	19.1815	17.0815	18.1931	20.0549	19.9974	20.7284
Arih2	9.09581	8.74182	9.67912	9.34412	9.90144	10.9966
Ark2c	0	0	0	0	0.0133994	0
Ark2n	3.18464	3.11067	3.63319	3.31141	3.39663	4.00533
Arl1	144.482	130.052	159.281	116.972	120.739	138.389
Arl10	3.08527	2.56894	2.86904	3.10305	4.10092	2.92172
Arl11	2.01485	2.09073	1.90841	3.61495	3.29632	4.06331
Arl13b	1.7926	1.47568	2.28795	1.60316	1.38864	2.12788
Arl14ep	4.93608	4.12186	5.04727	5.47056	6.12721	6.6855
Arl14epl	0	0.0279625	0.0214587	0.0498333	0.0835641	0.0638959
Arl15	0.558871	0.510449	0.539502	0.865969	0.854248	1.04168
Arl16	28.2823	26.9198	24.5749	28.5966	26.045	26.6269
Arl2	19.7577	19.8588	17.5969	22.0377	25.3686	25.1265
Arl2bp	39.5139	43.4107	39.416	40.6099	41.8559	39.5683
Arl3	67.5689	67.0085	63.726	58.8503	59.8947	61.6502
Arl4a	3.02133	3.06015	2.85327	1.96079	1.4851	1.79605
Arl4c	11.784	11.0774	11.3345	12.8765	12.8749	14.0989
Arl4d	1.31918	1.19675	0.979622	1.16457	1.35109	1.2154
Arl5a	11.0169	10.2381	11.5416	10.4529	10.8265	11.8779
Arl5b	2.64463	2.68705	2.72255	2.77206	3.59217	3.32447
Arl5c	0	0	0	0	0	0.00673315
Arl6	4.23586	2.84828	3.87068	3.35383	3.44688	3.90961
Arl6ip1	52.6717	53.2074	53.8058	42.8704	41.7134	41.1733
Arl6ip4	29.1899	30.4438	28.2395	24.6858	24.9342	25.8621
Arl6ip5	94.3845	98.3311	96.7656	55.3319	51.5474	54.4297
Arl6ip6	2.65293	2.71558	2.59207	1.76384	2.07424	2.29987
Arl8a	41.8218	42.6944	40.3456	49.2993	51.1181	46.0311
Arl8b	60.5233	57.5734	61.4063	50.5117	50.1306	50.1415
Arl9	0	0	0	0.00650404	0	0.0324311
Armc1	6.64145	6.59412	7.13568	7.34654	7.52583	8.00318
Armc10	11.3596	11.535	11.503	15.2151	14.7736	14.0329
Armc12	0.0194722	0.0966672	0.0395644	0	0	0
Armc2	0.750023	0.640422	0.502895	0.333677	0.19287	0.476457
Armc3	0.00795105	0.0315775	0.0565434	0.0160788	0.0314558	0.0320695
Armc5	5.78988	5.12225	5.33372	6.10228	7.04368	6.37535
Armc6	7.83785	7.6512	8.53139	7.10915	6.88885	6.99005
Armc7	1.12086	1.11287	1.29577	1.3336	1.50519	1.30559
Armc8	3.56521	3.26713	3.47486	3.76135	3.56567	3.77622
Armc9	4.53865	4.74483	4.79676	6.02037	5.74824	5.57343
Armcx1	8.24978	8.30347	9.09262	10.4034	9.48366	11.1538
Armcx2	18.5074	19.025	19.0958	30.7708	31.1956	31.5404
Armcx3	17.6929	16.976	18.9095	24.7739	24.3017	27.2387
Armcx4	2.63154	2.3137	2.35586	3.49983	3.94624	4.09487
Armcx5	3.51377	2.84883	3.48002	2.678	2.72434	3.00005
Armcx6	2.20611	2.24355	2.37179	5.26255	4.67106	4.01709
Armh1	0	0	0	0	0.0064214	0
Armh3	4.73946	4.8335	4.11738	4.30038	4.51306	4.19244
Armh4	0.653092	0.850173	1.10581	0.403547	0.279906	0.504881
Armt1	4.73012	5.5096	5.5066	4.53146	4.31424	5.0758
Arnt	15.4262	14.8159	14.4407	13.7489	12.6163	13.7707
Arnt2	12.9728	12.7159	13.3651	13.0925	13.3973	13.1472
Arpc1a	73.0323	78.8121	70.2405	79.1906	80.9781	74.3229
Arpc1b	324.343	342.655	313.892	322.177	327.367	321.371
Arpc2	259.34	258.404	272.664	252.154	246.864	259.345
Arpc3	228.256	247.793	246.014	193.672	192.883	190.65
Arpc4	169.741	169.638	168.876	146.357	151.605	149.53
Arpc5	139.365	133.108	143.823	116.33	117.709	132.183
Arpc5l	4.12801	3.8991	4.94216	6.12539	5.85321	8.76079
Arpin	15.1862	16.3693	15.3373	11.2551	10.9969	11.2757
Arpp19	21.1473	19.7459	21.5429	21.4645	24.4982	23.9928
Arpp21	0	0.00880999	0	0.00224296	0	0
Arrb1	11.4873	11.4571	11.0354	8.54251	7.84269	7.68231
Arrb2	1.65427	1.35486	1.57993	1.68037	1.3421	1.39903
Arrdc1	10.3287	10.1057	9.33427	7.09749	8.10795	6.16801
Arrdc2	4.51257	5.49638	4.98983	0.838051	1.03229	0.969888
Arrdc3	12.5977	12.0237	13.8386	5.81824	5.27326	6.19568
Arrdc4	4.33182	3.83099	4.71729	3.88926	3.994	4.42233
Arsa	12.2799	13.3471	14.5208	14.9957	14.922	15.9949
Arsb	17.6124	19.0904	17.3502	21.0869	19.6079	19.1955
Arsg	0.256175	0.290085	0.40221	0.280429	0.337127	0.277526
Arsi	11.9208	11.1958	11.6303	22.3337	20.4947	20.5652
Arsj	3.75699	3.95194	4.34394	2.00563	2.07879	1.7882
Arsk	6.11867	6.07506	6.43538	5.54693	5.55102	5.02134
Arsl	9.75135	9.66926	9.51392	10.8784	10.9167	10.1585
Art3	0	0	0	0.0483664	0	0.0120585
Arv1	2.49798	1.91235	2.54442	2.89795	2.76969	2.60499
Arvcf	2.56031	3.11728	2.60107	2.77143	2.83417	2.93343
Arxes1	0.109044	0.108267	0.0474773	0.0945054	0	0.0157077
Arxes2	0.0149673	0.0148606	0	0.0151336	0	0.0452764
As3mt	4.60123	5.36406	5.09465	5.81545	6.60892	6.7509
Asah1	60.3517	55.683	63.5979	75.2201	72.7919	79.287
Asah2	2.07253	1.77545	2.11944	2.21679	2.11759	2.37998
Asap1	48.1654	44.7056	46.5593	32.3077	31.935	33.9023
Asap2	2.80131	2.79785	2.80491	2.18194	2.14137	1.93898
Asap3	3.24151	3.24643	3.3612	6.08787	6.18525	5.87202
Asb1	1.40313	1.68606	1.8193	1.8211	1.52687	1.43213
Asb11	0	0	0	0	0.0106449	0
Asb12	0.0986592	0	0.157504	0.0142508	0.0278796	0
Asb13	2.19772	1.88618	2.77511	1.8204	1.87891	1.55249
Asb14	0	0	0.0121445	0	0	0
Asb15	0.890407	0.687603	1.51322	0.716907	0.614283	0.720485
Asb18	0	0	0.00481199	0	0	0
Asb2	0	0	0	0.013914	0	0.00462529
Asb3	2.74886	1.99212	2.40614	2.69255	2.4578	2.46863
Asb5	0.0994465	0.088864	0.0404119	0.0553034	0.0885215	0.0350967
Asb6	9.19982	10.0648	8.66774	7.87516	9.45064	8.70086
Asb7	3.00576	2.40529	2.69812	2.46762	2.71549	2.66442
Asb8	15.6786	16.164	16.1216	13.5316	15.021	15.587
Asb9	0.0145533	0	0	0	0	0
Ascc1	11.0985	12.1721	11.3261	10.8677	11.7886	10.515
Ascc2	15.432	16.2991	15.1298	12.6182	12.8272	11.5822
Ascc3	4.48668	4.28275	4.96132	4.30306	4.14134	4.50593
Ascl1	0	0	0	0	0	0.00944453
Ascl2	0.195812	0.0747756	0.122418	0.0913792	0.104282	0.227822
Asf1a	6.6823	6.11089	6.45818	5.48526	5.7134	5.62982
Asf1b	5.24665	3.56779	4.65002	1.92028	2.9054	2.45233
Asgr1	0.411938	0.392642	0.619374	0.466498	0.407426	0.89721
Asgr2	0.0160748	0	0.0326615	0.406337	0.317975	0.0810447
Ash1l	8.31064	7.42345	8.86556	8.10282	8.18032	9.07973
Ash2l	23.6703	21.3349	24.4759	24.1749	21.7883	22.4141
Asic1	0.00386899	0.0883525	0.047167	0	0.019133	0.00780254
Asic2	0.00724105	0	0	0.0439291	0.00716172	0.0146029
Asic3	0.688702	1.07453	0.821829	1.65799	1.74074	1.73061
Asic4	0.00900998	0.035783	0.0366136	0.00911011	0.0712902	0.0817663
Asic5	0	0.0498874	0	0	0.0124238	0
Asl	3.93154	4.35732	3.83387	4.06112	4.02449	3.34848
Asmt	0	0	0.031079	0.030932	0	0
Asmtl	9.74181	10.4419	11.2556	12.5085	11.2134	13.2252
Asns	24.2165	23.4123	24.4363	58.5462	58.5995	57.0699
Asnsd1	19.5546	18.0804	19.713	18.5647	19.4892	19.3738
Aspa	0.513985	0.559867	0.770576	0.771976	0.671225	0.56859
Aspg	0	0.0186287	0	0	0	0.0094595
Asph	7.30763	6.99386	7.35464	6.96813	6.84252	7.27146
Asphd1	0	0.0114904	0	0	0.137354	0
Aspm	1.724	1.3273	1.43975	0.595826	0.710465	0.640845
Aspn	20.2118	18.2376	21.7074	12.5085	12.4985	14.638
Aspscr1	13.4349	13.2924	14.2322	10.5285	10.6339	10.1484
Asrgl1	11.1945	11.2427	12.1804	7.39749	6.48162	6.80308
Ass1	2.14096	2.2524	1.41162	0.0573446	0.210349	0.157266
Aste1	0.238371	0.233385	0.40361	0.230978	0.209565	0.353863
Astn1	0.0252487	0.0225619	0.0128253	0.0178705	0.0149833	0.00509187
Astn2	0.570338	0.341851	0.555386	1.39253	1.30235	1.28005
Asxl1	7.24941	6.76239	7.30954	6.81542	6.65085	6.8258
Asxl2	1.83974	1.6832	1.75056	1.89363	2.10019	2.11484
Asxl3	0.00147029	0.000729903	0.0156838	0.00148663	0.00290836	0.00148255
Asz1	0.0686325	0	0.013945	0.0416371	0.0135761	0.0553641
Atad1	14.739	14.4679	17.4448	17.1778	18.284	20.189
Atad2	2.44231	2.38364	2.55588	1.58704	1.49549	2.05976
Atad2b	1.20865	0.939001	1.0758	1.0744	1.28209	1.31999
Atad3a	17.0722	18.7067	17.7609	12.9835	12.4971	12.1399
Atad3aos	0.484878	0.855862	0.62943	0.571978	0.452924	0.516086
Atad5	0.360384	0.438405	0.501355	0.252775	0.369281	0.461605
Atat1	1.99326	1.95431	2.49748	4.0644	4.39463	4.7651
Atcay	0.113085	0.0604578	0.114885	0.211092	0.249503	0.157885
Ate1	11.766	10.2756	11.8419	16.3049	16.6029	18.0481
Atf1	14.2766	14.7818	14.8655	14.6934	14.6329	15.0355
Atf3	0.656402	0.663573	0.618353	1.66528	1.51089	1.69682
Atf5	181.782	191.318	186.912	316.79	323.811	296.067
Atf6	11.9173	11.8712	11.6302	17.3891	17.2095	18.2717
Atf7	11.7827	11.2626	10.6643	9.27748	9.20652	9.13423
Atf7ip	8.20889	7.64794	7.964	7.60768	7.54054	6.93907
Atf7ip2	0.01574	0.0208371	0.0213208	0	0	0
Atg10	0.488162	0.382062	0.311775	0.401943	0.42777	0.497044
Atg101	20.6447	20.465	19.4074	19.3819	21.3916	20.85
Atg12	18.9681	17.3953	18.8721	16.7848	17.025	19.2123
Atg13	22.1055	19.625	20.2876	18.0615	18.2627	18.0904
Atg14	3.52846	3.3447	3.64109	2.85836	2.35631	2.93457
Atg16l1	7.97214	7.87328	8.48626	8.3123	8.06283	8.13473
Atg16l2	1.42076	1.25234	1.02944	0.995915	1.05828	1.20397
Atg2a	8.86626	9.22579	7.84259	7.17108	7.26575	6.62044
Atg2b	4.59769	4.53022	4.77741	4.09508	4.07024	4.03686
Atg3	37.9406	41.4777	40.418	35.7058	35.7819	39.771
Atg4a	11.0098	9.7064	11.6063	5.61846	6.89031	7.04565
Atg4b	7.98345	8.0219	8.26502	7.19819	7.6506	7.37215
Atg4c	1.82337	1.6158	2.11208	2.36915	2.42278	2.68055
Atg4d	3.35124	2.12262	2.82933	2.851	2.84592	3.16945
Atg5	10.9395	11.8307	11.7359	14.0222	13.8393	13.675
Atg7	1.73462	1.68863	1.70281	1.25434	1.24675	1.07397
Atg9a	27.4917	27.937	26.4173	24.2026	24.5631	22.2221
Atic	75.7512	82.2216	76.7442	64.7717	60.1162	63.7296
Atl1	0.736152	1.34133	1.17523	0.752513	1.19214	0.832022
Atl2	5.53104	4.59571	5.40689	4.621	4.2144	5.0717
Atl3	49.7133	45.8656	51.2096	31.2851	30.1518	33.4711
Atm	2.2862	1.97875	2.41747	1.88857	1.94895	1.96626
Atmin	2.33579	2.43657	1.97748	2.44147	2.13962	2.40994
Atn1	33.5094	33.6478	31.9574	32.057	32.8292	28.686
Atoh8	17.0782	18.0157	16.3676	3.26611	3.20468	3.32753
Atosa	3.03234	2.86155	3.12918	2.0095	1.92849	2.26224
Atosb	13.6408	13.3152	12.8154	15.6409	16.4019	15.384
Atox1	78.8153	86.9325	76.069	73.6209	83.9373	67.9466
Atp10a	2.46075	2.20166	2.07044	2.84699	3.28976	3.0081
Atp10b	0	0.00329772	0	0.00671661	0	0.0033491
Atp10d	3.63338	3.58384	3.69468	3.36761	2.98792	3.05308
Atp11a	21.9544	21.612	21.7456	28.0898	27.85	28.3264
Atp11b	6.06333	5.1389	6.21966	6.80834	6.74932	7.36044
Atp11c	1.33661	1.25634	1.44276	1.02602	1.03279	1.23876
Atp13a1	16.9744	16.89	16.1158	15.8285	15.1309	13.4576
Atp13a2	6.73522	7.36606	6.1783	7.01625	6.6733	5.92056
Atp13a3	2.5292	2.39112	2.68979	2.73195	2.93102	2.81901
Atp13a4	0	0.00512524	0	0	0	0.00520509
Atp13a5	0	0	0	0	0.00707197	0
Atp1a1	167.499	172.267	165.779	177.835	173.587	166.756
Atp1a2	0.152257	0.0916191	0.098433	0.0186605	0.0319431	0
Atp1a3	0.0719504	0.0649433	0.0465155	2.21557	2.40011	2.44034
Atp1a4	0	0.0264746	0	0.00674025	0	0.00672178
Atp1b1	30.9762	31.2677	29.2091	13.9105	14.585	14.4794
Atp1b2	0.0238531	0.0789438	0.145397	0.0803941	0.0786395	0.0160348
Atp1b3	142.931	141.44	141.797	133.835	133.419	140.377
Atp1b4	0	0	0	0.00345674	0	0
Atp23	3.65916	3.58864	3.91067	3.69982	3.35345	3.1368
Atp2a1	0.0677295	0.0605221	0.0550461	0.102723	0.026795	0.136589
Atp2a2	73.9787	72.3323	72.7014	87.8883	85.4574	89.2023
Atp2a3	0.118986	0.0945104	0.0870337	0.519732	0.414243	0.417526
Atp2b1	7.87802	6.88944	7.9825	7.61135	8.18189	9.12521
Atp2b2	0.00268065	0	0	0	0	0
Atp2b3	0.00225078	0.00223474	0.00457322	0.00227579	0	0
Atp2b4	0.452518	0.603488	0.715425	0.28969	0.211863	0.275396
Atp2c1	17.8596	15.8401	17.0284	13.8637	13.7567	14.3602
Atp2c2	0.0140816	0.0279625	0.0786818	0.405786	0.334256	0.205887
Atp4a	0	0	0.00613965	0	0	0.00609387
Atp5f1a	248.038	260.844	246.868	201.888	192.778	193.204
Atp5f1b	435.2	465.672	434.798	403.614	411.101	379.46
Atp5f1c	95.7251	99.4176	101.1	81.7578	85.1362	82.5545
Atp5f1d	134.29	149.507	127.037	112.093	114.094	96.7265
Atp5f1e	242.065	264.165	222.446	223.131	234.629	238.886
Atp5if1	276.426	267.871	278.681	171.613	173.018	187.539
Atp5mc1	84.5488	83.0724	82.5202	86.2061	84.9144	76.3223
Atp5mc2	194.23	217.955	203.753	208.927	206.046	195.155
Atp5mc3	150.44	156.313	164.699	138.617	125.952	122.507
Atp5me	203.354	192.306	197.602	148.702	153.884	158.373
Atp5mf	294.388	314.167	293.506	238.305	233.05	236.823
Atp5mg	135.101	140.865	134.857	114.46	111.976	114.49
Atp5mk	148.878	143.01	159.394	125.367	121.658	145.39
Atp5mpl	71.5336	73.4242	75.2065	56.1089	57.1617	59.2831
Atp5pb	131.762	129.656	143.372	122.707	118.695	128.743
Atp5pd	235.869	238.752	235.082	207.895	206.815	195.229
Atp5pf	66.5274	72.5331	78.1741	62.3176	63.2369	67.9051
Atp5po	172.613	180.727	169.679	152.825	141.772	145.213
Atp6ap1	134.013	133.409	132.043	142.264	141.822	132.692
Atp6ap1l	0.0963419	0.134787	0.204649	0.274526	0.21656	0.0838986
Atp6ap2	36.8935	33.2146	35.836	41.396	36.3693	40.4051
Atp6v0a1	23.4685	23.5916	22.1435	20.789	21.7706	21.383
Atp6v0a2	13.9252	12.8169	13.3091	12.3628	12.4104	12.2121
Atp6v0a4	0.0290887	0.158848	0.0738795	0.07353	0.0287701	0.124658
Atp6v0b	32.2109	36.6409	30.8816	41.6278	40.3676	35.8853
Atp6v0c	223.154	240.922	221.441	230.743	237.615	215.055
Atp6v0d1	107.069	115.216	103.183	122.323	127.168	113.295
Atp6v0d2	0.670822	1.26008	0.847272	1.41155	0.878655	1.49909
Atp6v0e1	127.012	126.923	127.852	120.51	124.386	116.977
Atp6v0e2	5.46632	6.21828	7.1998	7.44348	7.19953	9.86052
Atp6v1a	28.5998	26.7115	28.6284	29.7951	30.6621	33.7219
Atp6v1b1	0.0378397	0.0657476	0.115326	0.00956506	0.0467815	0.0190777
Atp6v1b2	29.2397	27.3565	29.7677	34.0865	33.0384	31.9377
Atp6v1c1	22.2326	20.7502	22.598	24.1566	24.9816	25.4803
Atp6v1c2	1.92529	1.53354	1.44506	1.22758	1.42105	1.4198
Atp6v1d	107.316	105.136	112.042	108.908	104.391	108.177
Atp6v1e1	100.165	104.597	104.52	86.8434	83.7667	90.2383
Atp6v1e2	0	0.00671507	0	0.00683843	0.00668919	0
Atp6v1f	125.694	127.618	120.313	149.167	149.45	143.887
Atp6v1g1	163.212	174.526	170.671	166.72	164.891	170.376
Atp6v1g2	0.0833251	0.0551542	0.225738	0.112335	0.233502	0.140034
Atp6v1h	17.1826	18.4159	21.1169	19.6459	16.7974	18.4829
Atp7a	8.63613	8.17958	8.396	7.58114	7.47312	8.07278
Atp7b	0.0249015	0.0463575	0.0158112	0.191984	0.184715	0.247954
Atp8a1	0.361245	0.342116	0.307712	0.98901	1.00041	1.19925
Atp8a2	1.12708	1.02758	1.04655	0.890137	1.03313	0.982203
Atp8b1	0.546776	0.500576	0.602371	1.76625	1.68557	1.92252
Atp8b2	28.4665	28.342	28.8662	27.1563	28.203	26.7219
Atp8b3	0.0105283	0	0.0267398	0.07984	0.020826	0.0371566
Atp8b4	0.261536	0.16	0.158346	0.945581	1.16794	1.11347
Atp8b5p	0.0139018	0.0138027	0.0494308	0.0386548	0.00687475	0.0420533
Atp9a	0.871956	0.903383	0.841821	1.56068	1.93372	1.1359
Atp9b	10.4147	10.3925	10.8111	9.5889	8.87596	9.36897
Atpaf1	4.90852	4.18695	4.69185	3.88306	3.95098	4.45141
Atpaf2	9.59007	8.65171	8.1107	9.06661	8.29096	7.74588
Atpsckmt	2.7268	2.76497	3.89008	3.23373	3.23488	3.86839
Atr	2.22096	1.76135	2.20555	1.72353	1.68317	2.01274
Atraid	25.3906	24.9171	25.1962	19.4361	20.3595	21.4065
Atrip	2.53775	2.04078	2.60076	1.86069	1.59257	1.63112
Atrn	14.7402	14.4493	14.4403	17.3533	16.6526	17.8802
Atrnl1	3.52545	3.07141	3.49564	2.3306	2.20703	2.28055
Atrx	4.74575	4.1147	5.48852	4.72187	4.92486	5.85034
Atxn1	1.77865	1.7355	1.78235	1.46193	1.75917	1.64689
Atxn10	113.004	113.315	108.215	92.2225	91.7227	89.9132
Atxn1l	7.23058	7.14416	7.17372	5.91268	6.21323	6.44394
Atxn2	10.9495	10.959	10.272	10.9679	11.178	10.5826
Atxn2l	22.9597	22.5314	23.2885	25.7415	25.2468	24.8964
Atxn3	2.69345	2.46742	3.06676	2.29473	2.23742	2.37689
Atxn7	1.1503	1.04578	1.0372	1.35693	1.24736	1.41843
Atxn7l1	0.95997	0.936108	0.91984	1.2133	1.19452	1.03555
Atxn7l2	1.1668	1.12365	1.34581	1.87167	1.85685	1.63654
Atxn7l3	11.7315	10.7934	11.3956	14.2409	14.6934	13.6312
Atxn7l3b	22.4557	21.1685	23.8982	19.4044	20.2631	21.2342
Auh	2.64412	2.71166	2.63016	1.97831	2.41786	2.22324
Aunip	0.631915	0.479785	0.679738	0.225507	0.128675	0.187408
Aup1	48.5892	52.5418	47.8354	36.1324	38.3028	32.7287
Aurka	4.56491	4.15765	4.64671	2.15336	2.86181	2.60051
Aurkaip1	58.0434	59.2667	54.3663	52.683	54.382	48.5327
Aurkb	5.88157	6.62618	6.22877	3.56597	3.12323	3.18416
Aurkc	0.884916	0.718862	0.803655	0.759182	0.928267	1.44661
Auts2	2.65807	2.58983	2.63831	3.48694	3.87544	3.56596
Aven	10.4563	10.7929	10.6678	9.36121	8.0452	8.94782
Avil	0.58559	0.410784	0.549647	0.991121	1.11428	1.18095
Avl9	3.52106	2.89559	3.6359	2.93124	3.14197	3.48626
Avp	0.0061279	0.0486738	0.0249018	0.049568	0.0121216	0.0185371
Avpi1	39.9952	39.7319	41.4752	47.1318	47.2482	43.3464
Avpr1a	270.133	276.251	258.322	91.1452	92.3988	90.2522
Awat2	0.0145444	0	0	0	0	0
Axdnd1	0.0209449	0.0311934	0.0478763	0.0317665	0.0103577	0
Axin1	7.97388	7.68189	8.92962	8.63459	10.7757	9.52642
Axin2	1.21256	0.833481	0.821242	0.758974	0.896163	0.613577
Axl	110.162	111.973	108.108	96.5388	95.0328	94.1028
Azi2	6.56433	6.81617	7.37926	7.03263	7.46666	7.11193
Azin1	19.6846	17.0884	18.974	18.5427	18.4452	19.9148
Azin2	1.81644	1.85842	2.6041	2.64772	3.31949	2.26857
B2m	252.421	270.519	267.868	348.256	350.77	368.932
B3galnt1	19.7528	17.7141	18.6368	17.6816	18.2216	18.6564
B3galnt2	4.26519	4.41147	4.33309	4.25074	4.69697	5.41662
B3galt1	0.0966107	0.0703429	0.0959676	0.073806	0.13165	0.0541204
B3galt2	0	0	0.0107798	0	0	0
B3galt4	1.95315	2.26741	2.44215	1.42797	1.93176	1.69675
B3galt6	3.42376	3.06932	2.69031	3.32737	3.41913	3.63108
B3galt9	0.0673155	0	0	0	0	0
B3gat1	0	0	0	0.00681702	0	0
B3gat3	50.1949	50.9177	48.7976	52.552	54.3434	51.2513
B3glct	7.53811	7.76571	7.10412	10.7463	11.067	11.3206
B3gnt2	17.4841	18.5533	18.1256	9.23349	8.36984	7.93019
B3gnt4	0.0584647	0.0116096	0.0118791	0.0236458	0.0115649	0.094324
B3gnt5	0.371291	0.363059	0.50865	0.307159	0.2782	0.272282
B3gnt6	0.0143871	0.0028569	0.0233857	0.0349127	0.025613	0.0145071
B3gnt7	0.168395	0.204349	0.237605	0.406748	0.342354	0.386767
B3gnt8	0.0879904	0.122309	0.116209	0.19573	0.00870265	0.124214
B3gnt9	7.86994	8.04018	8.07628	4.75946	5.1234	4.71769
B3gntl1	0.775324	0.656647	0.804749	0.642265	0.587596	0.642389
B4galnt1	2.42736	2.33427	1.89215	1.65166	1.15509	1.60095
B4galnt2	0.0709701	0.0448409	0.0917636	0.0130471	0.0319058	0.00650566
B4galnt3	0.0479092	0.062204	0.01872	0.00745256	0.0546743	0.0408768
B4galnt4	0.106839	0.251934	0.101756	0.0405099	0.0990645	0.0403989
B4galt1	22.8796	23.7203	22.467	25.187	24.9482	23.9871
B4galt2	7.04581	8.1211	6.83036	12.4005	12.2168	11.4107
B4galt3	6.02026	7.10148	7.42116	10.5452	9.78746	10.0114
B4galt4	8.86587	9.70113	9.03984	11.3607	11.0382	10.0152
B4galt5	17.0571	17.8472	16.9739	19.5218	18.3283	19.9378
B4galt6	2.72097	2.23943	2.67253	2.22438	2.14606	2.24631
B4galt7	21.731	20.1021	21.0824	16.6317	16.8645	16.879
B4gat1	21.9203	22.4646	20.4104	12.5874	13.1406	10.6597
B9d1	4.52001	4.41917	4.23388	2.70441	3.39047	3.11514
B9d2	4.2309	4.90087	4.05318	4.01524	3.15677	3.98553
Baalc	0.150625	0.0498504	0.183627	0.0304597	0	0.141756
Baat	0	0	0.0140921	0	0	0
Babam1	37.525	40.2002	37.9605	32.6414	29.8961	31.7005
Babam2	26.1307	27.637	28.2897	23.63	23.9083	23.4433
Bace1	15.1527	14.7267	14.2757	12.4123	11.9398	12.208
Bace2	0.147375	0.292649	0.249535	0.0695392	0.281803	0.0792557
Bach1	6.80121	5.93828	6.5074	3.77151	3.9538	4.57048
Bach2	0.00121358	0.0132543	0.00986322	0.017179	0.0132032	0.00244742
Bag1	43.8807	47.4323	46.8781	38.8223	40.7144	37.566
Bag2	27.2093	26.6208	24.6608	47.9445	45.5828	45.347
Bag3	56.8359	57.7739	52.6672	29.7622	31.537	27.8961
Bag4	6.71992	5.38168	5.67835	7.78815	7.94213	7.2128
Bag5	10.4718	11.6111	11.8522	10.8902	10.9848	12.0273
Bag6	35.4472	36.1699	33.5362	31.6354	33.559	31.6706
Bahcc1	2.07056	2.10104	2.26551	2.112	2.44664	2.54032
Bahd1	11.7931	11.3569	10.9799	8.58559	8.65375	9.03013
Baiap2	21.7437	23.439	22.3454	9.29097	9.69407	8.75835
Baiap2l1	14.3705	13.8063	13.9693	4.74611	4.61609	4.70076
Baiap2l2	0	0.0538855	0	0.0391967	0	0.0312715
Baiap3	0	0	0.00648387	0.032266	0	0
Bak1	21.0844	23.0266	19.715	18.966	16.977	17.4044
Bambi	2.19874	1.94531	2.23375	1.88567	1.94499	2.07075
Banf1	59.2408	71.1577	67.0141	62.8518	61.2338	66.1263
Bank1	0.00670202	0	0	0	0	0
Banp	7.07898	7.1022	6.72429	7.14264	7.60323	6.56191
Bap1	17.3657	18.0191	17.2381	11.9866	11.5689	11.3236
Bard1	0.740686	0.643481	0.554711	0.328852	0.335762	0.272893
Barx1	0	0	0.0175329	0	0	0
Basp1	158.266	154.047	161.288	221.445	231.311	230.457
Batf	1.66163	1.86814	2.0108	2.3719	1.90928	2.29148
Batf2	0	0.0175378	0.00448623	0.00446501	0.0218378	0.0356222
Batf3	0.842042	0.468183	0.136871	0	0.0333127	0.0339627
Bax	83.6706	89.4603	81.9957	94.5281	94.6605	95.5318
Baz1a	4.4108	4.34929	4.95796	3.72481	4.16776	5.06224
Baz1b	24.6316	23.0036	25.8777	22.4476	21.4178	23.5272
Baz2a	8.4101	8.68942	8.57087	6.86611	7.20177	6.78664
Baz2b	1.88189	1.56368	2.04643	1.4202	1.57845	1.65801
Bbc3	4.30036	3.55809	3.88932	4.05651	3.95933	3.59591
Bbip1	2.01372	1.64354	1.85506	2.32943	2.10981	2.02191
Bbln	25.8413	27.7665	25.1147	30.8152	30.4101	25.3169
Bbof1	0.19845	0.445923	0.551773	0.158412	0.299579	0.242233
Bbox1	0.0156137	0.0155024	0	0.00789362	0.0154427	0.007872
Bbs1	2.65575	2.99195	3.15679	1.96196	2.23753	2.12339
Bbs10	2.45571	2.21577	2.04837	1.35912	1.08231	1.81588
Bbs12	0.546549	0.450366	0.470263	0.355258	0.382439	0.337414
Bbs2	4.11979	3.2757	3.76426	3.10493	2.56863	2.88318
Bbs4	4.32398	4.57251	4.69369	3.85547	4.4011	4.25553
Bbs5	4.14155	3.55903	3.94632	3.0757	2.78258	4.2049
Bbs7	4.60827	4.35518	5.3359	3.63208	3.94207	3.37681
Bbs9	3.43388	2.9307	3.3416	2.73538	2.47434	2.71708
Bbx	7.07053	6.19901	7.31009	4.64534	4.68424	5.3429
Bc1	1.84506	1.37393	2.34304	0.93278	1.82484	1.08526
Bcam	0.170636	0.249146	0.142761	0.679979	0.645284	0.495936
Bcan	0	0	0	0	0.0051663	0.0421368
Bcap29	25.8894	23.5973	27.8162	18.9589	19.17	23.2897
Bcap31	83.4019	83.8271	83.1498	74.3903	70.0099	71.9232
Bcar1	39.446	43.5618	35.8373	28.8541	27.3209	25.0706
Bcar3	7.33814	7.19132	6.46264	6.65386	6.55777	6.71493
Bcas1	0	0	0.00775223	0	0	0
Bcas2	37.8088	40.7289	37.3836	32.5048	30.3067	36.6065
Bcas3	3.13053	3.45177	3.03876	2.33793	2.52857	2.21246
Bcat1	190.288	202.049	192.802	140.711	136.1	132.898
Bcat2	18.3257	18.2752	18.7996	19.5628	19.7389	18.5148
Bccip	25.3324	22.5355	25.9507	20.0127	20.0135	22.9642
Bcdin3d	2.03927	1.63104	2.07174	1.71828	1.7368	1.2947
Bche	0.0882575	0.0125183	0.0640446	0.0254967	0.0872907	0.0381402
Bckdha	22.9499	23.0319	21.2629	20.3008	20.0073	17.9034
Bckdhb	14.4674	14.3327	11.7775	11.5612	10.9948	11.7057
Bckdk	42.3605	43.5075	40.8711	42.459	43.8079	39.6383
Bcl10	10.1133	8.99762	10.8948	7.98524	8.28861	9.26672
Bcl11a	0.0123157	0.0317927	0.0250236	0.0199242	0.0535956	0.0198696
Bcl11b	0.380197	0.533563	0.371394	0.687524	0.574895	0.645092
Bcl2a1	1.52435	0.908091	0.791515	4.21286	4.45595	3.72312
Bcl2l10	0	0	0.0223977	0	0	0
Bcl2l12	6.4308	5.1846	5.80146	5.47491	5.44447	5.7582
Bcl2l13	7.34877	6.83973	7.48998	5.90439	5.94064	6.67147
Bcl2l14	0.234936	0.199939	0.144911	0.483578	0.414933	0.253817
Bcl2l15	0	0	0.0849006	0	0.0275516	0
Bcl2l2	8.35729	7.96435	9.21928	8.71525	9.61683	10.5512
Bcl3	2.25867	2.21038	2.8875	4.49105	4.18995	3.54159
Bcl6	3.03714	2.7906	2.75814	2.19027	2.458	2.39658
Bcl6b	0.00568095	0	0.00577139	0.0229764	0.0730434	0.0286418
Bcl7a	0.73838	0.670989	0.743777	0.639027	0.532246	0.75085
Bcl7b	11.627	13.5481	13.4317	16.3996	17.763	16.9888
Bcl7c	11.1438	11.3773	10.7749	11.0801	12.4246	11.4237
Bcl9	3.57338	3.69322	3.336	3.49286	3.99863	3.91371
Bcl9l	18.4685	17.9337	17.252	19.411	20.4579	18.0632
Bclaf1	25.496	22.6617	29.5793	18.5269	18.4222	22.1738
Bclaf3	2.18075	2.40818	2.09391	2.19398	2.06542	2.42377
Bco1	0.197445	0.339296	0.108009	0.153569	0.0751085	0.153148
Bco2	0.324936	0.185208	0.250638	0.212947	0.172591	0.364052
Bcor	2.87177	2.9734	2.76071	2.84273	3.12887	2.74741
Bcorl1	1.75016	1.69353	1.72753	1.81987	1.97939	1.87292
Bcr	3.63903	3.256	3.42459	3.56376	3.74792	3.48147
Bcs1l	5.36158	6.02902	5.92829	4.48822	4.92055	4.09874
Bdh1	3.87756	3.68951	4.09126	3.37611	3.50957	3.41513
Bdh2	7.45803	6.93954	6.50028	11.8883	14.0674	11.753
Bdkrb1	1.42404	1.45086	1.54127	1.34576	1.59255	1.28576
Bdkrb2	0.334919	0.564776	0.264639	0.155882	0.15248	0.262666
Bdp1	2.76835	2.26371	3.03733	2.1253	2.3069	2.56362
Bean1	0.149806	0.00437467	0.0537145	0.196022	0.126376	0.0799709
Becn1	40.2083	40.7181	43.0765	42.924	40.3403	44.6288
Begain	0.335903	0.333509	0.508882	0.357512	0.285596	0.303052
Bend3	0.909187	0.941785	0.791709	1.13419	1.29629	1.25411
Bend4	0.0200784	0.0227832	0.0349681	0.00290023	0.00567386	0.0115691
Bend5	0	0.0128187	0	0.0913792	0.0893849	0.104147
Bend6	12.8401	13.4696	14.6053	12.0884	11.8982	11.8205
Best1	0.0323915	0.171524	0.109691	0.0327515	0.0640734	0.0108873
Best2	0	0	0.0114822	0	0	0
Best4	0	0.00516124	0	0	0	0
Bet1	20.2413	18.2383	19.7909	18.7065	19.2963	21.0295
Bet1l	17.1803	16.7799	16.6605	18.7121	18.5515	20.0871
Bex1	0.0305525	0	0	0.123568	0	0.0308074
Bex2	0	0	0	0	0.143322	0
Bex3	31.8197	32.6707	36.4618	29.2693	28.6752	28.3453
Bfar	22.5744	20.4808	21.5983	18.3522	19.0184	18.9477
Bfsp1	0.50624	0.388397	0.358451	0.263688	0.227588	0.193357
Bfsp2	0.433221	0.470458	0.481378	0.410658	0.200848	0.477788
Bglap	0.972411	0.048274	0.345762	0.0491609	0.048088	0.0490262
Bgn	872.453	884.118	828.874	1755.74	1764.42	1632.26
Bhlha15	0	0	0.00682803	0.00679573	0.0199422	0
Bhlhe22	0.0685002	0.0151138	0.0154646	0.0153914	0.0150555	0.0306985
Bhlhe23	0	0	0	0	0	0.0538956
Bhlhe40	14.6494	13.8326	14.0625	18.9233	20.5605	20.4592
Bhlhe41	1.9757	2.05146	2.36721	5.52024	6.95853	6.37954
Bhmt	0	0	0.0773478	0	0	0
Bicc1	19.8877	18.8719	18.8553	20.1234	20.5477	20.8642
Bicd1	2.06396	1.67925	2.49968	1.77048	2.06025	2.34374
Bicd2	16.9836	16.8849	16.691	16.3546	17.1531	17.6576
Bicdl1	0	0.0544043	0	0.0761802	0.0541946	0.013813
Bicra	15.1315	15.2361	14.7653	5.86594	6.48061	6.03306
Bicral	2.93537	2.58515	2.9632	2.62637	2.21343	2.38164
Bid	37.8265	40.7504	38.6826	15.9865	16.7339	18.0246
Bin1	34.9477	34.0911	37.3022	24.741	26.948	26.6953
Bin2	0.959429	0.635061	0.962206	1.49245	1.53287	1.78603
Bin2a	0	0	0.0369369	0	0	0
Bin3	13.6943	12.8126	14.5027	9.88391	10.6409	9.55632
Birc2	5.91535	4.76536	5.8785	4.9266	4.96326	5.14491
Birc3	0.684826	0.425577	0.695728	0.752215	0.643214	0.620988
Birc5	3.89249	3.99314	4.71644	2.4059	2.46851	1.98204
Birc6	11.5604	10.6538	11.3342	9.52109	9.19409	9.8034
Bivm	4.32187	4.28031	4.2091	4.42466	4.63342	4.75112
Blcap	21.8659	22.0722	19.5359	25.75	27.2832	28.124
Bles03	23.3553	23.4803	21.8033	16.6536	16.6676	16.4155
Blk	0	0	0	0	0	0.0301938
Blm	0.944974	0.695172	0.850586	0.539621	0.590798	0.557891
Blmh	25.9167	25.8543	25.9224	20.3387	18.8183	21.4116
Blnk	0.269654	0.101993	0.143496	0.441435	0.508001	0.82866
Bloc1s1	59.6708	55.6419	61.4987	57.669	53.5044	51.0628
Bloc1s2	20.3114	18.6139	21.3076	17.5607	17.414	17.0488
Bloc1s3	6.29232	4.61899	4.07484	5.83458	6.25289	4.96159
Bloc1s4	9.33661	11.5289	10.0584	9.79001	11.3584	9.57967
Bloc1s5	6.00883	6.14938	4.85356	6.9969	6.19875	6.30727
Bloc1s6	11.2608	11.4507	10.2764	9.91824	10.3411	9.91393
Bltp1	5.35542	4.79034	5.64827	5.16373	5.49013	6.65859
Bltp2	45.4632	46.8191	45.6214	48.6332	47.9792	44.647
Bltp3a	1.76386	1.81432	1.94533	2.50343	2.46577	2.46543
Bltp3b	7.96858	7.57724	7.96377	10.3604	10.0546	10.8431
Blvra	31.0019	31.51	32.1481	22.7721	25.5066	21.3216
Blvrb	48.4814	57.2578	53.8792	25.8913	26.015	23.7947
Blzf1	6.14001	6.98258	7.10042	4.85432	3.93006	4.84102
Bmal1	9.97084	9.97477	9.92493	6.54798	5.87712	6.49449
Bmal2	8.64387	8.23643	9.48196	5.36183	4.87922	6.07825
Bmerb1	0	0	0.0504301	0	0	0
Bmf	1.78332	1.41744	1.63102	1.0741	1.29312	1.17295
Bmi1	7.25246	7.28023	7.81199	9.0885	9.63302	10.2555
Bmp1	20.9474	22.9237	22.845	28.9353	31.2603	31.2697
Bmp2	3.30622	3.23841	4.0107	1.15337	1.19871	1.29398
Bmp2k	4.7662	4.43382	4.64106	5.39402	5.48686	5.48026
Bmp3	5.85921	4.70625	6.68818	7.27782	6.47871	6.74894
Bmp4	14.7925	14.0737	13.6181	15.2906	15.367	15.3767
Bmp5	0.280971	0.152165	0.395729	0.148504	0.0568418	0.115902
Bmp6	1.59353	1.47399	1.22455	1.37024	1.38075	1.66176
Bmp7	0	0	0	0.0263236	0	0.00656288
Bmp8a	1.31214	1.32648	1.30274	0.0783974	0.0589895	0.0180421
Bmp8b	0.314591	0.312349	0.106533	0.296881	0.321516	0.401806
Bmper	1.22419	1.10497	1.09293	2.13265	1.89741	2.33521
Bmpr1a	18.0583	15.933	17.8993	18.0772	17.3139	18.5715
Bmpr1b	1.95249	1.70046	2.04664	2.09972	2.15435	2.26467
Bmpr2	12.1458	11.2513	12.2629	13.1036	13.1045	15.3232
Bms1	16.1743	14.0658	16.2168	9.86402	10.0244	10.8437
Bmt2	7.62744	6.76638	8.79327	9.30494	9.85625	9.68072
Bmx	0.121232	0.120368	0.13086	0.0229837	0.00749403	0.00764025
Bmyc	6.07533	6.99097	5.95049	4.12673	5.45413	4.93223
Bnc1	0	0.00488255	0	0	0	0
Bnc2	2.05922	1.91215	2.00685	3.0779	3.42145	3.3864
Bnip1	8.49188	8.64988	7.76995	6.84304	7.45557	8.19285
Bnip2	16.6062	15.5055	17.7196	18.5225	19.2711	19.8927
Bnip3	42.5271	38.4753	40.082	63.8929	60.0813	66.0789
Bnip3l	20.1634	20.1074	21.1439	21.6536	21.9105	22.1056
Bnip5	0.0453751	0.0300344	0.0537803	0.0152931	0.00747967	0.0457536
Bnipl	0.00569599	0	0.0289333	0.00575929	0.00563359	0
Boc	4.27193	4.14162	3.85592	4.00361	4.62827	4.25419
Bod1	13.2067	17.7888	13.121	19.5557	17.352	17.4132
Bod1l1	3.73985	3.72211	4.46074	2.88486	2.65316	3.50848
Bok	8.48842	9.74221	9.39681	10.122	10.3429	9.04309
Bola1	9.49673	10.4182	9.34641	7.93044	9.16207	10.2386
Bola2	168.881	171.677	165.658	109.841	123.558	120.462
Bola3	17.283	18.9695	18.8413	13.4983	13.0456	14.4286
Boll	0	0	0	0.0129623	0	0
Bop1	15.8014	19.921	16.111	14.0486	14.2513	11.7119
Bora	1.20265	1.36208	1.39984	0.672167	0.603702	1.08471
Borcs5	0.610427	0.606076	0.532181	0.624506	0.702223	0.61552
Borcs6	10.6584	11.5329	9.85548	9.8863	10.2765	9.04834
Borcs7	15.8296	13.2837	15.6443	14.8336	14.5426	15.7057
Borcs8	57.6497	61.8059	55.1966	46.4722	49.6718	43.1132
Bpgm	10.2385	9.63798	10.0329	9.85435	9.78028	10.2194
Bphl	1.61311	1.92575	1.97046	1.65046	2.79203	2.11067
Bpi	0	0	0	0	0	0.010104
Bpifb4	0.0112753	0	0	0.0114006	0	0.0682165
Bpifb5	0.00454128	0.00450891	0	0.00459175	0.0179661	0.00915833
Bpifc	0.0102193	0	0	0.0206658	0.0101074	0
Bpnt1	15.3693	15.5011	14.7945	12.0545	12.8186	13.2024
Bpnt2	15.1447	14.3638	15.7696	12.4332	12.9494	13.9864
Bptf	6.50811	5.80632	6.46996	6.03418	6.2245	6.15835
Braf	1.40837	1.56886	1.5333	1.39146	1.19971	1.68639
Brap	16.2256	16.8695	15.2366	15.6386	17.3048	15.4278
Brat1	4.49167	5.04972	4.15643	4.47833	4.88176	4.25159
Brca2	0.437834	0.388839	0.502919	0.349265	0.330762	0.441486
Brcc3	9.56254	10.2247	11.058	9.14159	8.27902	10.3371
Brd1	6.68229	5.98819	6.86804	7.13651	6.57229	7.29329
Brd2	37.2703	37.0451	38.7722	33.446	34.3292	32.8164
Brd3	7.27869	6.91455	6.85062	7.24601	7.37671	6.90902
Brd3os	1.90978	1.69576	1.15149	1.53853	2.04243	2.12925
Brd4	12.9596	12.6098	12.5201	11.1931	11.7328	10.9765
Brd7	31.5038	28.9822	32.7531	30.2767	29.3819	34.0287
Brd8	10.351	10.7198	11.4748	10.2208	9.85511	9.69705
Brd9	10.7374	10.2702	11.0682	9.49521	9.8155	9.70724
Brdt	0.179628	0.113494	0.160368	0.13209	0.134591	0.0987963
Brf1	3.06934	3.06439	2.97268	3.37931	3.07956	3.65203
Brf2	5.49971	6.12239	5.45702	3.43501	3.85454	4.39511
Bri3	5.65493	6.24863	5.75664	6.54956	6.33834	5.69051
Bri3bp	9.16848	10.9196	9.48534	8.67502	8.4233	7.16697
Bricd5	0.143071	0.0947007	0.0968989	0.241101	0	0.312573
Brinp1	0.0278895	0.0553815	0	0.0634488	0.0482721	0.0773361
Brinp2	1.48841	1.39107	1.5263	0.370937	0.30064	0.295937
Brip1	0.545345	0.439645	0.478262	0.518415	0.626961	0.465295
Brix1	11.5373	9.41538	10.0296	8.62361	9.16724	11.4765
Brk1	99.8052	104.961	106.502	100.176	99.9232	97.8863
Brme1	1.86138	1.58686	1.76231	1.41566	1.57753	1.71641
Brms1	43.2066	41.5937	41.8915	41.5034	40.0033	35.6527
Brms1l	9.78182	8.60215	9.97698	8.92502	9.31379	10.4662
Brox	17.338	15.6511	18.4749	17.1478	17.053	19.5915
Brpf1	5.2765	5.39912	5.29591	3.60455	3.54523	3.99902
Brpf3	4.42417	4.1826	4.54647	5.0597	5.08995	4.88401
Brsk1	0.52323	0.43704	0.514684	0.361094	0.566784	0.594591
Brsk2	0	0.00492757	0	0	0	0
Brwd1	1.74406	1.7777	1.70504	1.3783	1.52607	1.77811
Brwd3	1.24708	1.09927	1.42555	0.861126	1.00879	1.18387
Bscl2	27.2366	27.1647	25.3157	25.6107	25.2039	24.9408
Bsdc1	17.1242	16.1853	16.3839	15.4533	15.0402	16.6273
Bsg	333.8	351.54	330.065	427.017	440.384	402.53
Bsn	0.0742217	0.100222	0.0799275	0.0315196	0.0176181	0.0269427
Bspry	0	0	0.0109691	0	0.0213578	0
Bst1	66.5694	57.8381	63.1344	44.141	47.3779	46.7051
Bst2	2.13772	1.93087	3.22746	1.00569	1.32144	1.73642
Btaf1	5.85144	5.34635	5.64585	5.12815	4.77609	4.9536
Btbd1	20.5274	20.8106	21.1618	21.1273	19.7677	22.4217
Btbd10	6.37937	6.83156	7.13743	8.38953	8.48503	8.67982
Btbd16	0.102949	0.0908578	0.13945	0.104093	0.32809	0.161479
Btbd17	0	0	0	0.00870911	0	0.0173705
Btbd19	4.84611	5.39621	5.78086	5.28459	5.43725	5.65893
Btbd2	4.98966	6.12078	5.46848	5.30283	5.69128	4.91803
Btbd3	2.3642	1.72678	1.79908	1.68982	2.1412	1.9866
Btbd6	12.8452	12.5809	11.3259	11.2503	10.8004	12.8537
Btbd7	7.65643	7.64879	7.31512	8.53703	7.67155	8.87807
Btbd8	0.399759	0.291607	0.458615	0.508689	0.430345	0.348251
Btbd9	0.262419	0.271849	0.256356	0.24495	0.27659	0.287561
Btc	0.852571	0.692586	0.236221	0.666126	0.344958	0.820607
Btd	16.6799	17.0381	14.726	16.6178	16.2013	16.2066
Btf3	192.91	196.35	204.192	167.844	176.098	164.252
Btf3l4	11.7712	11.2306	12.7869	12.1028	12.1592	13.44
Btg1	94.6481	94.0378	96.5991	74.9846	73.1719	71.121
Btg2	14.5134	13.038	14.4484	7.59394	6.50782	7.60157
Btg3	34.5412	33.0092	35.8569	37.8762	36.476	39.7605
Btg4	0.0469806	0	0	0	0	0
Btk	0.173558	0.287201	0.302264	0.593311	0.318791	0.616686
Btla	0	0.0053822	0	0.00548108	0	0
Btn1a1	0.0263091	0.0261216	0.0427647	0.0319218	0.0156126	0.00530573
Btn2a2	1.311	1.46989	1.60368	2.79541	2.84907	2.82373
Btnl12	0.0108456	0.00215367	0.00440732	0.0197391	0.0193083	0.0371829
Btnl8	0	0	0.00759557	0	0	0
Btrc	3.29143	3.61624	3.73501	4.01334	3.8501	3.83746
Bub1	3.18256	2.8363	3.57982	2.07492	2.35699	1.89466
Bub1b	2.59369	2.50009	2.63498	1.36043	1.50176	1.57465
Bub3	29.2541	31.2386	32.1049	26.2215	27.8185	24.6389
Bud13	5.3834	5.76873	5.52468	4.82367	4.76169	5.59381
Bud23	15.5871	16.7503	17.6682	11.4723	11.0379	9.8654
Bud31	35.3078	34.38	38.8147	38.1367	37.9261	44.9167
Bves	0.200703	0.123359	0.126223	0.7151	0.609693	0.472215
Bysl	19.328	23.7486	21.7231	21.2908	22.0454	21.4325
Bzw1	56.5636	51.9742	57.7092	47.7286	46.8251	52.3103
Bzw2	18.251	19.0601	19.723	16.7997	15.1831	16.011
C10h17orf58	4.82724	4.89115	4.22506	5.6443	6.34133	5.85349
C10h1orf35	6.69389	6.74734	6.41747	5.769	5.66325	4.41763
C10h5orf15	109.803	105.901	109.278	100.379	104.097	104.584
C10h5orf58	0	0	0	0.032529	0.0318191	0
C11h3orf38	6.84197	4.60586	5.76814	5.97628	6.39501	6.3753
C11h3orf70	6.17653	5.86035	6.02887	6.55928	7.26106	8.19966
C12h12orf43	32.5079	33.4744	31.2407	28.328	28.163	28.2196
C13h1orf116	0	0.0226871	0.0290171	0.0288798	0.0790986	0.0288007
C13h2orf76	0.660551	0.504495	0.851739	0.633641	0.711946	0.640444
C14h1orf146	0	0.0303609	0	0.0618373	0.0100813	0
C14h2orf73	0	0	0.0261185	0	0	0
C14h4orf36	0.331466	0.200324	0.058564	0.0291435	0.199552	0.203445
C14h5orf52	0.206879	0.130712	0.0286598	0.0950808	0.00930057	0.113784
C15h14orf119	21.8934	24.4989	22.8312	20.8585	22.801	21.7611
C15h8orf58	1.25376	2.1992	1.8378	1.60575	1.58251	1.67359
C16h10orf71	0.339613	0.564149	0.408052	0.0858468	0.113041	0.0856116
C16h19orf44	5.67165	5.4196	5.19704	4.22605	4.38129	4.82188
C17h6orf52	0.435122	0.450805	0.445893	0.340489	0.246987	0.324295
C17h6orf62	36.3937	31.2869	36.2802	33.7048	34.9738	37.0315
C18h18orf32	69.1855	71.6927	66.0944	67.1954	63.9446	65.6697
C19h16orf46	0.202638	0.191134	0.253898	0.235623	0.243842	0.14303
C19h19orf53	33.3512	36.5273	32.4733	26.711	29.642	26.3604
C19h1orf131	7.57303	7.26783	7.40665	9.03156	8.71805	8.24141
C19h1orf198	81.2962	85.4985	77.9982	113.764	115.511	105.766
C1d	4.44598	3.88878	4.77095	3.95536	3.94518	4.42485
C1galt1	21.0211	19.8541	22.8599	8.4606	9.16648	9.6762
C1galt1c1	9.47789	10.1481	10.9204	9.76687	9.84767	10.6392
C1h10orf143	2.98954	3.75626	3.38654	2.80876	1.91014	3.89482
C1h10orf88	1.88303	1.4432	2.07242	1.33611	1.62551	1.93205
C1h10orf95	0	0.0281719	0.216194	0.114758	0.238538	0.0286109
C1h11orf16	0.0355262	0.141092	0.00902294	0.0449013	0.131764	0.0716452
C1h11orf58	51.8625	51.0516	53.8545	40.8301	42.0636	44.8635
C1h11orf98	34.8365	35.2642	34.8147	30.9019	29.1426	26.8126
C1h15orf40	7.0463	7.82557	7.92905	6.64667	6.66469	7.13834
C1h16orf54	0.0787306	0.283364	0.269946	0.776154	0.33094	0.555712
C1h19orf18	0.011127	0.00368256	0.00376804	0.0150009	0.00733673	0.00747988
C1h19orf81	0.039073	0.0193972	0.0595425	0.0592608	0.0966124	0.118197
C1h19orf84	0.0158595	0.0157465	0.128896	0	0.0156858	0
C1h9orf40	3.91341	4.39049	4.36323	3.58549	4.58316	4.74381
C1h9orf57	0	0.127908	0.0261754	0.0260515	0	0.0259802
C1h9orf85	3.10888	3.21271	4.06076	1.87323	2.93677	3.58264
C1qa	11.5792	12.1067	9.69889	8.62558	8.08675	10.2223
C1qb	17.2645	18.7116	18.7443	3.24252	4.1928	3.14505
C1qbp	91.1905	96.0455	91.3389	121.114	126.427	112.21
C1qc	23.6782	22.0539	21.7534	3.57099	2.54839	4.00916
C1ql1	0	0	0.0161012	0.016025	0.062701	0.0159811
C1ql3	1.13221	0.934872	1.25587	0.630804	0.365652	0.570828
C1ql4	0	0	0	0	0	0.0271624
C1qtnf1	48.7965	50.9987	47.3889	27.5581	27.5867	27.0543
C1qtnf12	1.9296	1.80842	1.97864	1.16698	1.49824	0.891022
C1qtnf2	11.8972	13.9706	11.1932	11.9958	12.5054	11.3272
C1qtnf3	9.49389	8.70804	8.7609	12.4449	12.1733	15.0093
C1qtnf4	0.0649311	0.0429789	0.0219883	0	0.0107033	0.0327364
C1qtnf5	102.64	109.547	106.874	96.2801	94.783	92.7019
C1qtnf6	31.6844	34.1349	30.4238	33.7117	35.7837	33.2671
C1qtnf7	3.06559	2.7663	2.66352	1.69526	1.94276	1.85636
C1qtnf9	0.00454564	0	0	0.0183846	0	0
C1r	157.551	162.158	159.107	168.971	170.592	168.066
C1rl	3.01315	2.7597	2.44726	2.28905	1.76099	2.37214
C1s	17.7702	17.0562	18.178	32.362	31.8913	32.5755
C2	24.3966	27.1388	25.1729	38.7438	39.562	38.0967
C2cd2	4.72332	4.13891	4.45698	5.9995	5.79098	5.8503
C2cd2l	6.3301	5.91263	5.259	6.66474	6.51928	5.80421
C2cd3	1.72971	2.05046	1.61463	1.9029	1.95314	1.8473
C2cd4a	0	0.00999127	0	0.0406993	0.10948	0.0710286
C2cd4c	0.0981368	0.0487187	0.0886214	0.121278	0.199516	0.120946
C2cd4d	0.0177365	0	0.108113	0	0	0
C2cd5	2.93101	2.33649	2.74384	1.99472	1.98835	2.34448
C2cd6	0.00231413	0	0	0	0	0
C2h1orf162	0	0.00486537	0.0199132	0.0247738	0.0242331	0.0345882
C2h1orf52	8.3202	8.23058	9.89503	10.7281	9.76918	11.0066
C2h1orf54	6.32746	6.16382	6.14518	2.61544	4.64441	3.97261
C2h1orf56	0	0	0	0.0194329	0.0190088	0
C2h3orf33	1.58492	1.3443	1.92571	1.80386	1.41789	1.80694
C2h4orf3	44.7937	40.0813	43.1257	28.3487	31.0013	31.4957
C2h4orf33	1.11002	0.778368	1.09246	0.484018	0.768506	0.888433
C2h4orf46	3.22639	3.44466	4.30634	2.29313	2.04281	2.98107
C2h5orf34	0.602971	0.681567	0.876447	0.314216	0.403694	0.547202
C3	0.82148	0.982457	0.635401	11.5105	11.4763	10.8954
C3ar1	0.0712684	0.0764213	0.0752991	0.138356	0.118419	0.123604
C3h11orf91	0.00761358	0.0226779	0.0425413	0.0153964	0.0263556	0.0537397
C3h20orf144	0.024537	0	0.0498553	0.248097	0.0485365	0.0742252
C3h9orf50	0.178686	0.181962	0.279278	0.0370609	0.0317206	0.0230996
C3h9orf78	34.0004	34.5958	34.1587	22.8886	26.5615	29.2881
C4a	0.66276	0.715067	0.623935	0.817553	1.0051	0.686111
C4b	0.0265352	0.0351281	0.00898587	0.00894335	0.0306186	0.00891885
C4bpa	0.0102459	0	0.0416359	0.0517987	0.0304009	0.0103314
C4bpb	0	0.0410825	0.0315271	0.0104593	0.0204621	0
C4h12orf71	0	0	0	0.0119767	0.0117153	0.0238877
C4h2orf81	0.0878598	0.0654252	0.111573	0.0555226	0.15207	0.0221482
C4h3orf20	0.248183	0.308018	0.315168	0.184285	0.207111	0.301086
C5	0.0129625	0.00858009	0.0263378	0.00436886	0.00854702	0.00871378
C5ar1	0.89656	1.10151	0.779778	3.91305	4.12748	3.37552
C5ar2	7.27973	6.82133	6.98671	2.70147	2.92392	2.75705
C5h1orf122	28.2513	29.7316	26.8771	32.7438	31.1916	30.8438
C5h1orf159	4.17105	3.44847	3.13378	2.00447	2.69011	2.31082
C5h1orf174	12.1626	16.037	14.6347	15.8301	16.7003	13.46
C5h1orf50	9.43628	9.70081	10.5888	9.12282	8.92371	10.0606
C5h6orf163	0.0754739	0.00681236	0.0487934	0.013875	0	0.0484295
C5h8orf88	0.0984541	0.122191	0.200043	0.373306	0.146063	0.198551
C5h9orf152	0	0.00751341	0.00768781	0.0612115	0	0
C6	5.24788	5.14453	5.63137	2.80609	3.77417	3.52034
C6h14orf180	0.447341	0.513073	0.407449	0.265149	0.244105	0.147765
C6h2orf16	0.0140357	0	0	0	0	0.0424584
C6h2orf50	5.68505	6.57587	5.19799	4.56984	5.62277	5.41719
C7	0.685825	0.617252	0.611529	0.294341	0.361116	0.268658
C7h12orf40	0	0	0	0	0.033965	0.00865691
C7h12orf56	0	0	0	0	0.00868651	0
C7h8orf33	8.34375	9.08659	8.2093	8.34147	9.40471	7.46591
C8g	1.52281	1.74913	1.66839	1.78126	1.94911	1.50541
C8h11orf52	8.91504	11.2398	9.19442	9.74375	10.4232	10.6266
C8h11orf54	10.8509	9.4135	10.8149	7.43963	8.19659	9.34312
C8h11orf65	0.0276185	0.0274216	0.0841744	0.00930846	0.0091053	0
C8h11orf71	13.294	13.0293	11.0712	11.9995	11.9069	8.16954
C8h11orf97	0.162625	0.0645864	0.0330428	0	0.0321687	0
C8h15orf39	3.59855	3.85291	3.2891	4.64227	5.38332	4.45893
C8h15orf61	0.585072	0.375878	0.47784	0.208791	0.59001	0.694063
C8h3orf86	0.149592	0.169743	0.282236	0.0432154	0.317042	0.0861941
C9	0	0.0224541	0.0114877	0.0457333	0.0111838	0.011402
C9h6orf132	0.129769	0.138047	0.113001	0.220247	0.160434	0.135525
C9h6orf141	3.24782	4.50373	4.38707	3.87098	4.25308	4.46413
COX1	11218.4	11360	11481.4	10110.2	9755.44	9424.79
COX2	4353.26	4119.24	4755.85	4565.62	4766.66	5175.28
COX3	5855.01	5699.24	6195.55	5607.1	5811.34	5806.71
CYTB	5449.84	5245.65	5161.84	4334.75	4255.2	4058.86
Caap1	4.43199	3.86836	4.8995	2.88967	3.63263	3.50088
Cab39	29.3507	28.2295	29.5996	26.619	25.6555	28.2414
Cab39l	8.9633	9.24678	10.2007	8.73746	8.42912	9.66602
Cabcoco1	0	0	0	0.0141414	0.0138327	0
Cabin1	6.4215	6.79728	6.42137	4.89936	4.53145	5.00203
Cables1	2.25058	2.41296	2.16234	0.358097	0.281261	0.32721
Cables2	6.41046	6.72891	6.85405	7.18473	7.69293	8.38233
Cabp1	0.219671	0.459169	0.375862	0.724787	1.1778	0.979279
Cabp4	0	0.0213528	0.0109242	0	0	0
Cabp7	0.0400782	0.00795852	0.0244298	0.0243142	0.0317114	0.0808252
Cabyr	0	0.026497	0.013556	0.0269838	0.0395923	0.127822
Cacfd1	7.08228	8.07355	7.38464	9.8336	10.058	9.02844
Cachd1	5.27164	5.85287	4.50078	4.7053	4.55637	4.07967
Cacna1a	0.712309	0.781572	0.766821	0.664981	0.780561	0.838641
Cacna1b	1.24504	1.13352	1.10276	0.881667	0.669046	0.734221
Cacna1c	1.07576	0.917137	0.923853	1.54021	1.6598	1.65169
Cacna1d	0.524994	0.31613	0.402483	0.417782	0.36299	0.323507
Cacna1e	0	0.00653949	0	0.00665963	0.00130286	0
Cacna1g	3.73693	3.45035	3.40165	1.66352	1.61904	1.52002
Cacna1h	0.842009	0.569874	0.515024	0.624532	0.602256	0.525872
Cacna1i	0.210678	0.201963	0.127927	0.367274	0.299382	0.324757
Cacna1s	0.0232026	0.0422349	0.0471439	0.0273705	0.00382473	0
Cacna2d1	7.29068	7.24468	7.43723	6.91666	6.85473	7.76295
Cacna2d2	0.989913	1.13695	1.08238	0.818544	1.00811	0.723252
Cacna2d3	0.0643605	0.0639018	0.241925	0.0845984	0.11458	0.123305
Cacna2d4	0	0	0	0	0.00493964	0
Cacnb1	0.318439	0.265357	0.288847	0.0977433	0.320575	0.183483
Cacnb2	0.116536	0.0590334	0.10631	0.0913792	0.0588059	0.124703
Cacnb3	9.93728	9.81741	10.6057	16.2328	16.6277	15.0012
Cacnb4	0.00806067	0.00133387	0.00136483	0	0.00265746	0.00677327
Cacng4	0	0	0	0.026999	0	0.00673126
Cacng7	0.129947	0	0.0282891	0.0281553	0.0826223	0.0374375
Cactin	7.53696	7.73029	6.69899	6.39584	6.78732	6.46415
Cacul1	12.5929	12.9106	14.0153	14.0435	14.3158	15.8161
Cacybp	46.1066	45.447	48.6041	29.6704	32.237	36.5208
Cad	7.89828	8.5348	8.21305	7.49889	7.66058	7.84355
Cadm1	3.56852	3.29546	3.19288	2.38522	2.42034	2.43541
Cadm2	0	0.0023999	0.00245561	0.00733198	0	0.0024373
Cadm3	0.00959409	0	0.0682278	0.00485036	0.0237225	0.0435336
Cadm4	16.9209	18.1793	19.1613	14.1887	14.9475	14.1943
Cadps2	0.0466566	0.0370592	0.0236997	0.00471751	0	0
Cage1	0.130564	0.198263	0.249681	0.364983	0.243076	0.240074
Cahm	0	0	0.103955	0.0413852	0.020241	0.0825437
Calcoco1	27.3087	26.869	27.8615	21.3864	21.8533	20.2076
Calcrl	2.56526	2.39435	2.9038	2.42862	2.61793	3.04684
Cald1	319.033	297.448	331.461	420.357	417.278	472.686
Calhm2	26.9335	26.485	25.3544	19.2001	20.4548	20.8278
Calhm3	0	0.0227145	0	0	0	0.0922735
Calhm5	3.89288	3.71275	3.72805	0.931131	1.71122	1.91344
Calhm6	0	0.0206043	0.0210825	0	0.102624	0.0209253
Calm1	326.576	313.07	321.134	295.293	303.685	312.23
Calm2	415.812	415.755	434.696	348.244	352.521	365.261
Calm3	229.627	238.352	207.983	245.809	243.454	237.642
Calml3	0.946683	0.851471	1.05227	0.799547	0.649911	0.59521
Calml4	4.2309	4.12705	3.59445	2.42666	2.25134	1.39712
Calml5	0	0.0255538	0	0	0	0
Caln1	0	0.00208214	0.00852189	0.00212039	0	0
Calr	1394.89	1420.03	1409.37	1061.78	1059.36	1024.53
Calr3	4.46808	4.59099	4.76353	3.67722	3.17304	5.02923
Calr4	0	0	0.023438	0.0544298	0	0
Calu	427.983	397.737	444.237	457.714	450.574	496.127
Camk1	22.1356	21.4638	20.9318	15.6846	17.7428	16.9251
Camk1d	1.36558	1.27111	1.43935	1.00845	1.02261	1.21223
Camk2a	0.173412	0.0934672	0.110737	0.290563	0.215616	0.30975
[truncated: 18,065 more rows]
