# Supplementary material for: Peptide-based Self-adaptive Implant Coating Sequentially Regulates Bone Regeneration to Enhance Interfacial Osseointegration
Source: Research Square preprint supplement (doi:10.21203/rs.3.rs-5132912/v1), 2024-10-01
Supplement: Supplementary file 13 [file 0-GSEA_group.xlsx]

## Sheet: Sheet1
case	case_name	control	control_name
E1,E2,E3	E	C1,C2,C3	C
