# Supplementary material for: Peptide-based Self-adaptive Implant Coating Sequentially Regulates Bone Regeneration to Enhance Interfacial Osseointegration
Source: Research Square preprint supplement (doi:10.21203/rs.3.rs-5132912/v1), 2024-10-01
Supplement: Supplementary file 21 [file heatmap-coefficient_matrix.xls]

C1	C2	C3	S1	S2	S3
C1	1	0.999575349674482	0.998415624086575	0.865575961738777	0.850050608264376	0.867872618767166
C2	0.999575349674482	1	0.998806680020766	0.864929843313522	0.849389097719283	0.86732011480862
C3	0.998415624086575	0.998806680020766	1	0.860882886847163	0.844144472158045	0.864190835060562
S1	0.865575961738777	0.864929843313522	0.860882886847163	1	0.998553710956483	0.99901305633065
S2	0.850050608264376	0.849389097719283	0.844144472158045	0.998553710956483	1	0.997145241864577
S3	0.867872618767166	0.86732011480862	0.864190835060562	0.99901305633065	0.997145241864577	1
