# Supplementary material for: Peptide-based Self-adaptive Implant Coating Sequentially Regulates Bone Regeneration to Enhance Interfacial Osseointegration
Source: Research Square preprint supplement (doi:10.21203/rs.3.rs-5132912/v1), 2024-10-01
Supplement: Supplementary file 25 [file report.FPKM.xls]

sample	Min	1st_Qu	Median	Mean	3rd_Qu	Max	Sd	Sum
C1	0	0.0406612738410711	1.40439117480594	21.5141469245903	9.28092845679557	10110.1953109064	161.211380795799	432477.381478114
C2	0	0.0420446002120305	1.4129366904238	21.6159672990627	9.291330431587	9755.44087142326	161.514694814545	434524.174645759
C3	0	0.0439701010040598	1.483924300919	21.3527459830286	9.5264235392369	9424.79204677256	157.526680852477	429232.899750841
S1	0	0.042019910603718	1.53304357722987	22.9612045770279	9.92107062461777	14914.3328848616	189.504905169548	461566.134407416
S2	0	0.0410526033009635	1.46934109314699	23.365504804966	9.85541204792905	16299.8905266439	196.62519872226	469693.377589426
S3	0	0.0436176975781378	1.56799121290419	23.1211698768392	10.0584221034609	14676.1171614476	190.034524422733	464781.756864222
