# Supplementary material for: Peptide-based Self-adaptive Implant Coating Sequentially Regulates Bone Regeneration to Enhance Interfacial Osseointegration
Source: Research Square preprint supplement (doi:10.21203/rs.3.rs-5132912/v1), 2024-10-01
Supplement: Supplementary file 29 [file 0-DEG-fpkm.xlsx]

## Sheet: Sheet1
gene_id	S1	S2	S3	C1	C2	C3
A2m	11.4453	10.7001	10.5925	31.8427	31.9981	32.331
Abca8	0.534222	0.534591	0.841867	0.344511	0.232982	0.254494
Abcc9	5.99524	5.59834	5.97801	1.91555	1.85003	2.20048
Abhd15	2.57571	2.82296	2.97389	0.664608	0.740816	0.547185
Ablim1	0.826894	0.800406	0.79408	0.166835	0.158532	0.192048
Ablim3	0.0425198	0.0263855	0.0485963	0.22571	0.136676	0.144702
Abo	1.52246	2.14807	1.31605	0.594145	0.686847	0.754113
Acad11	16.643	15.5591	16.2883	7.66905	7.48376	7.30095
Ace	1.79502	2.04899	1.34737	0.306348	0.203544	0.167165
Acer2	4.19194	3.83656	3.77593	0.24582	0.29146	0.28229
Acp3	0.0734849	0.0798013	0.0256626	0.141637	0.134004	0.0995692
Acss3	5.34711	5.18884	5.72018	1.39108	1.43946	1.56068
Acta1	10.241	9.82799	9.65851	24.436	23.2253	19.2058
Acta2	477.265	513.045	470.619	2576.45	2548.32	2414.88
Actg2	34.4503	38.0557	35.3773	195.983	193.046	182.757
Adam19	29.2733	26.5619	28.8041	57.7174	57.5282	57.0081
Adam8	2.30621	2.13828	2.09849	0.69421	0.731295	0.828403
Adamts14	0.595478	0.555128	0.655756	2.52329	2.82339	2.58971
Adamts15	16.9216	16.0269	16.0715	5.94239	5.45187	5.54313
Adamts3	0.112286	0.146324	0.0570365	0.216423	0.242934	0.208754
Adamts9	4.89536	4.39068	4.72585	1.57658	1.81269	1.57427
Adap1	0.129053	0.0671176	0.106135	0.229907	0.431544	0.11154
Adcy8	0.416852	0.403662	0.292782	0.733695	0.834751	0.664225
Adcyap1r1	0.506116	0.621524	0.627832	0.188536	0.173883	0.220251
Add3	16.4974	16.1372	15.4683	5.59989	5.51347	5.37923
Adgrd1	0.393528	0.304534	0.41743	0.0526634	0.0944424	0.125462
Adgrg1	0.190621	0.276221	0.298334	0.734493	0.484071	0.488321
Adgrg2	0.0492475	0.112462	0.0350221	0	0.0194832	0.00496584
Adgrl1	1.27799	1.5057	1.60348	3.11139	3.04058	2.9455
Adgrl3	0.0442684	0.0199786	0.0408846	0.0664623	0.0663386	0.0919807
Adh1	0.327772	0.390523	0.372948	0.0132566	0.0389017	0.185083
Adh7	13.9683	12.4284	13.3468	0.473149	0.555388	0.377482
Adig	12.3297	13.5126	12.0493	4.74513	3.88204	5.46346
Adm2	0.288759	0.286701	0.361053	3.63837	3.91046	3.80758
Adora1	0.292696	0.230778	0.231762	0	0.0255432	0
Adora2a	0.0861299	0.0594894	0.102719	0.0151456	0.0259263	0.0377602
Adra1b	3.25129	3.7436	3.2771	1.13597	1.01858	1.31308
Adra1d	0.209613	0.240137	0.171998	0.586918	0.621951	0.406465
Adrb2	1.22853	1.565	1.35406	0.164062	0.492908	0.198673
Adss1	0.690615	0.404069	0.451034	0.23692	0.0975785	0.174094
Agbl5	0.294627	0.307154	0.339227	0.86888	0.762497	0.960576
Agtr1a	15.7939	15.0285	16.5849	5.11431	4.90889	4.97279
Ahcyl1	189.625	184.601	195.881	83.9587	82.7511	86.437
Ahrr	10.6083	9.85654	9.75736	3.39688	3.45246	4.23192
Ak4	3.20615	3.59556	3.55621	7.57302	7.28817	7.15478
Akna	1.00703	1.25623	1.40672	2.712	3.0327	2.63623
Akr1b8	302.452	290.471	301.864	53.5004	51.4601	54.4358
Akr7a3	0.443967	0.264481	0.165379	0.0748167	0.0292736	0.0746118
Aldh1a2	2.6696	1.86483	2.67994	7.63904	7.6393	8.47994
Aldh1l2	16.1012	16.0923	15.3188	41.0333	39.1948	40.9335
Aldh3a1	256.484	268.611	245.068	11.7403	11.1973	10.5109
Alox5ap	5.28148	5.87109	6.34111	2.98948	2.19942	2.34426
Alpk3	0.0766404	0.0434824	0.107522	0	0	0.00367999
Alpl	6.17048	6.44712	5.30224	25.371	23.7814	23.6294
Als2cl	2.69935	2.34259	2.31148	0.619378	0.958724	0.655014
Angpt1	11.1399	9.57818	12.0688	2.83471	2.90648	3.3753
Angpt2	0.792751	0.797457	0.339104	0.221484	0.196017	0.357611
Angpt4	33.2133	34.5999	33.1573	10.3231	10.7287	9.37066
Angptl4	4.36668	3.89864	4.22986	8.73629	8.328	7.38971
Angptl8	2.1305	1.44591	2.60278	4.47196	4.02761	4.24216
Ankfn1	0.00591069	0.01027	0.0135108	0	0	0
Ankrd1	0.603191	0.411005	0.252327	2.54721	2.81915	2.2063
Ankrd28	14.2265	12.7498	14.0992	5.48781	6.01098	6.14647
Ankrd44	5.94397	5.64515	5.75378	1.53197	1.72596	1.83904
Ankrd45	0.417135	0.327878	0.429662	0.708809	0.790751	0.946385
Ankrd66	0.0429732	0	0.0109143	0.11949	0.138133	0.108329
Anks1b	0.0374406	0.0332607	0.0340328	0.0498114	0.070163	0.0973629
Anxa3	4.02363	3.95199	3.50373	9.59904	9.45679	9.40447
Aoc3	12.3172	11.5845	11.8657	27.213	26.2265	25.0523
Aox1	23.9362	24.2675	25.9648	5.97336	6.10858	6.48261
Aox3	0.717522	0.561408	0.788369	0.118287	0.127276	0.117963
Ap1s2	9.23941	8.59038	10.4191	3.98162	4.19276	4.17671
Apba2	0.12448	0.123593	0.0824748	0.415896	0.497818	0.469329
Apela	0	0	0	0.274043	0.097477	0.149068
Aph1bl1	0.267853	0.172864	0.435388	0.609367	0.503346	1.93113
Aplp1	8.72303	8.38497	8.33764	17.4694	18.7076	16.1006
Apobec1	1.89818	2.10488	2.14507	0.577939	0.645484	0.48173
Apol2	0.0794571	0.0364111	0.0620939	0.12978	0.157173	0.166403
Apold1	0.660349	0.496822	0.591691	0.199062	0.271793	0.330861
Aqp1	1051.27	1095.04	1035.99	338.801	332.362	325.726
Aqp3	0.2894	0.0914257	0.13364	0.053203	0	0
Aqp7	0.13179	0.0654252	0.0334719	0.144359	0.347589	0.465112
Arhgap20	0.724906	0.447569	0.495089	0.289489	0.265096	0.190416
Arhgap25	0.170159	0.110465	0.226057	0.595556	0.809109	0.653317
Arhgap30	0.490072	0.486579	0.60924	0.867157	0.943897	1.30693
Arhgap45	0.284461	0.290865	0.211351	0.678274	0.663471	0.513734
Arhgap8	0.51345	0.347248	0.423347	0.120384	0.0441587	0.0225101
Arhgap9	0.183112	0.162999	0.224515	0.772508	0.636993	0.764024
Arhgdib	4.91917	4.4659	4.73767	13.1267	14.6107	14.6228
Arhgdig	0.566882	0.584489	0.708808	0.0881818	0.107822	0.373746
Arhgef2	10.6021	10.8159	9.99928	19.2252	21.0857	20.6539
Arhgef33	0.080034	0.0765205	0.0451712	0.152855	0.114338	0.155426
Arhgef37	0.0790952	0.0499746	0.0584395	0	0	0.0145009
Armcx6	2.20611	2.24355	2.37179	5.26255	4.67106	4.01709
Armh4	0.653092	0.850173	1.10581	0.403547	0.279906	0.504881
Arrdc2	4.51257	5.49638	4.98983	0.838051	1.03229	0.969888
Arrdc3	12.5977	12.0237	13.8386	5.81824	5.27326	6.19568
Artn	0.0997584	0.0726348	0.0427908	0.596236	0.635845	0.561073
Asgr2	0.0160748	0	0.0326615	0.406337	0.317975	0.0810447
Asic3	0.688702	1.07453	0.821829	1.65799	1.74074	1.73061
Asns	24.2165	23.4123	24.4363	58.5462	58.5995	57.0699
Aspm	1.724	1.3273	1.43975	0.595826	0.710465	0.640845
Ass1	2.14096	2.2524	1.41162	0.0573446	0.210349	0.157266
Astn2	0.570338	0.341851	0.555386	1.39253	1.30235	1.28005
Atat1	1.99326	1.95431	2.49748	4.0644	4.39463	4.7651
Atf3	0.656402	0.663573	0.618353	1.66528	1.51089	1.69682
Atf4	126.03	119.805	126.304	247.445	254.879	248.808
Atoh8	17.0782	18.0157	16.3676	3.26611	3.20468	3.32753
Atp1a2	0.152257	0.0916191	0.098433	0.0186605	0.0319431	0
Atp1a3	0.0719504	0.0649433	0.0465155	2.21557	2.40011	2.44034
Atp1b1	30.9762	31.2677	29.2091	13.9105	14.585	14.4794
Atp2a3	0.118986	0.0945104	0.0870337	0.519732	0.414243	0.417526
Atp2b4	0.452518	0.603488	0.715425	0.28969	0.211863	0.275396
Atp2c2	0.0140816	0.0279625	0.0786818	0.405786	0.334256	0.205887
Atp7b	0.0249015	0.0463575	0.0158112	0.191984	0.184715	0.247954
Atp8a1	0.361245	0.342116	0.307712	0.98901	1.00041	1.19925
Atp8b1	0.546776	0.500576	0.602371	1.76625	1.68557	1.92252
Atp8b4	0.261536	0.16	0.158346	0.945581	1.16794	1.11347
Aunip	0.631915	0.479785	0.679738	0.225507	0.128675	0.187408
Avil	0.58559	0.410784	0.549647	0.991121	1.11428	1.18095
Avpr1a	270.133	276.251	258.322	91.1452	92.3988	90.2522
B3gnt2	17.4841	18.5533	18.1256	9.23349	8.36984	7.93019
Baiap2	21.7437	23.439	22.3454	9.29097	9.69407	8.75835
Baiap2l1	14.3705	13.8063	13.9693	4.74611	4.61609	4.70076
Batf3	0.842042	0.468183	0.136871	0	0.0333127	0.0339627
Bcam	0.170636	0.249146	0.142761	0.679979	0.645284	0.495936
Bcl2a1	1.52435	0.908091	0.791515	4.21286	4.45595	3.72312
Bcl2l14	0.234936	0.199939	0.144911	0.483578	0.414933	0.253817
Bend5	0	0.0128187	0	0.0913792	0.0893849	0.104147
Bgn	872.453	884.118	828.874	1755.74	1764.42	1632.26
Bhlhe41	1.9757	2.05146	2.36721	5.52024	6.95853	6.37954
Bicra	15.1315	15.2361	14.7653	5.86594	6.48061	6.03306
Bid	37.8265	40.7504	38.6826	15.9865	16.7339	18.0246
Blnk	0.269654	0.101993	0.143496	0.441435	0.508001	0.82866
Bmp2	3.30622	3.23841	4.0107	1.15337	1.19871	1.29398
Bmp5	0.280971	0.152165	0.395729	0.148504	0.0568419	0.115902
Bmp8a	1.31214	1.32648	1.30274	0.0783974	0.0589895	0.0180421
Bmx	0.121232	0.120368	0.13086	0.0229837	0.00749403	0.00764024
Brinp2	1.48841	1.39107	1.5263	0.370937	0.30064	0.295937
Bsn	0.0742217	0.100222	0.0799275	0.0315196	0.0176181	0.0269427
Btk	0.173558	0.287201	0.302264	0.593311	0.318791	0.616686
Btn2a2	1.311	1.46989	1.60368	2.79541	2.84907	2.82373
Bves	0.200703	0.123359	0.126223	0.7151	0.609693	0.472215
C16h10orf71	0.339613	0.564149	0.408052	0.0858468	0.113041	0.0856116
C1galt1	21.0211	19.8541	22.8599	8.4606	9.16648	9.6762
C1h16orf54	0.0787306	0.283364	0.269946	0.776154	0.33094	0.555712
C1qb	17.2645	18.7116	18.7443	3.24252	4.1928	3.14505
C1qc	23.6782	22.0539	21.7534	3.57099	2.54839	4.00916
C1ql3	1.13221	0.934872	1.25587	0.630804	0.365652	0.570828
C2cd4a	0	0.00999127	0	0.0406993	0.10948	0.0710286
C3	0.82148	0.982457	0.635401	11.5105	11.4763	10.8954
C3h9orf50	0.178686	0.181962	0.279278	0.0370609	0.0317206	0.0230996
C5ar1	0.89656	1.10151	0.779778	3.91305	4.12748	3.37552
C5ar2	7.27973	6.82133	6.98671	2.70147	2.92392	2.75705
Cables1	2.25058	2.41296	2.16234	0.358097	0.281261	0.32721
Cabp1	0.219671	0.459169	0.375862	0.724787	1.1778	0.979279
Cacna1g	3.73693	3.45035	3.40165	1.66352	1.61904	1.52002
Cadps2	0.0466566	0.0370592	0.0236997	0.00471751	0	0
Calhm5	3.89288	3.71275	3.72805	0.931131	1.71122	1.91344
Camk2a	0.173412	0.0934672	0.110737	0.290563	0.215616	0.30975
Capn12	0.642462	0.353526	0.471824	0.0704388	0.122491	0.148297
Car12	0.0923247	0.0427778	0.137565	0.267606	0.22524	0.266872
Car3	2.33744	2.36719	2.42214	17.2529	17.5584	17.512
Card14	0.121559	0.164581	0.145948	0.502813	0.397115	0.631437
Carmn	1.48022	1.19908	1.75351	3.78221	3.84236	3.89577
Casp12	9.16635	8.4262	10.3014	18.5364	16.4967	20.0601
Casp4	3.97938	4.20131	5.52446	22.8126	23.1161	26.1998
Casq2	1.66721	1.40655	1.99725	4.0828	4.1176	3.94528
Cass4	0.0730358	0.0773496	0.0494657	0.305236	0.125209	0.186568
Catip	0.125826	0.363431	0.2789	0.0693952	0.0113135	0.0115342
Catsperg	0.0661014	0.0656303	0.0848257	0.0246238	0.0172046	0.0140322
Cav2	17.6659	17.5306	19.7351	7.79128	7.90351	8.65245
Cavin2	6.03956	5.29822	6.46461	1.77218	1.79975	1.77858
Cbarp	1.05623	1.65949	1.34426	3.61468	3.82852	2.94936
Cbfa2t3	0.0183552	0.0136683	0	0.0835164	0.118002	0.101796
Cblb	17.4795	15.2151	15.9657	7.25289	7.40061	7.38004
Ccdc134	15.8802	15.1273	15.9405	5.60452	5.18232	5.36942
Ccdc3	0.0774198	0.0970964	0.0538147	0.01648	0.0161204	0.00821744
Ccdc74a	0.995025	0.954444	0.668199	0.30694	0.533763	0.3061
Ccdc80	417.568	412.933	414.298	1031.14	1021.55	1048.62
Ccl12	0	0.043536	0	13.6554	15.1789	12.4685
Ccl2	134.905	123.153	140.013	309.672	308.198	325.904
Ccl20	1.21724	1.40999	1.88437	19.0183	22.4443	23.9634
Ccl3	1.16193	0.623593	0.765681	2.63545	2.26734	1.45661
Ccl4	0.036882	0.183095	0.112407	1.64084	1.34968	1.37602
Ccl6	0	0	0.155753	4.83994	5.2566	4.19114
Ccl9	0.01783	0.0177029	0.0181138	0.594928	0.335059	0.28766
Ccn3	198.629	195.415	200.415	62.4356	62.461	65.6213
Ccnb1	6.12754	6.59385	6.1075	2.74305	2.71896	3.23158
Ccnd1	235.572	230.544	240.291	78.2249	78.4274	79.8652
Ccnjl	0.176265	0.10938	0.111919	0.408429	0.33414	0.199952
Ccr5	0.085929	0.170633	0.0678976	0.646803	0.566585	0.500621
Cd163	3.22134	2.74391	2.74816	1.22491	1.2254	1.16603
Cd180	0.169519	0.336622	0.178369	0.75295	0.664662	0.52501
Cd2	0.408597	0.405685	0.871714	1.50795	1.43463	1.27722
Cd28	0.167892	0.0645273	0.121046	0.202614	0.208906	0.322203
Cd300a	0.549983	0.416732	0.617553	0.848777	1.31695	0.890233
Cd300ld	0.0159736	0.0185031	0.00811395	0.056529	0.0816263	0.0590586
Cd300le	3.56995	4.14731	4.41628	6.87547	8.98323	8.15449
Cd300lf	0.0891415	0.0221265	0.0679205	0.77739	0.264495	0.730318
Cd36	1.29377	0.950107	0.948829	0.116107	0.00757156	0.154386
Cd37	0.323436	0.200707	0.287512	0.545051	0.386538	0.760981
Cd53	3.41619	2.81509	3.52678	7.09011	6.68914	6.93122
Cd5l	0.2892	0.155533	0.232594	0.779769	0.834259	0.93559
Cd6	0	0	0.00778484	0.030992	0.0227367	0.0849946
Cd83	0.350432	0.231956	0.202438	0.68781	1.21647	0.561212
Cd84	0.202064	0.12767	0.233273	0.603642	0.890243	0.639033
Cd8a	0.238657	0.37236	0.155865	4.36081	4.06331	3.74724
Cd8b	0.338798	0.242944	0.152974	1.218	1.30312	1.2716
Cdc42bpg	1.66737	1.58746	1.38453	3.00614	3.0949	3.01326
Cdca7	1.29966	1.55251	1.28941	0.49279	0.451907	0.573346
Cdca7l	0.97075	1.11644	1.15057	0.212667	0.240029	0.228398
Cdh18	0.31312	0.350241	0.511384	0.0601139	0.031361	0.0439627
Cdh3	3.68137	4.03506	3.88073	8.58527	9.4876	9.28687
Cdh6	0.351367	0.342402	0.330519	0.0263164	0.0900972	0.0918551
Cdh7	0.0805534	0.0399896	0.0227321	0.126698	0.119506	0.157938
Cdhr1	11.9028	12.7968	11.4902	25.3862	24.3775	24.976
Cdhr2	0.586725	0.307077	0.300343	0.708215	0.782727	0.793413
Cdkn1c	3.91636	4.34657	4.1159	0.864802	0.857058	1.11208
Cdkn3	13.269	12.8526	12.5118	6.90097	6.18469	4.84436
Cds1	0.206744	0.241494	0.39536	0.737792	0.733718	0.760297
Cdt1	1.81896	2.2575	1.35371	1.0479	0.606652	0.650479
Cebpa	19.7097	21.6713	19.2945	8.37455	9.50596	7.80674
Cenpf	2.44613	1.90218	2.87708	0.661679	0.714193	1.14225
Cenpi	1.92914	1.98755	2.33571	0.98197	0.784113	1.10585
Cenpm	8.3663	8.43728	7.32346	4.41585	2.21178	2.83856
Cenpt	2.84228	2.71092	2.52375	1.22196	1.52732	0.947809
Cenpu	1.85423	1.54879	1.67444	0.83326	0.71319	0.8013
Cep72	0.755045	0.974563	0.813089	0.389352	0.306177	0.403513
Cfap44	0.0162157	0.00322003	0.0230634	0.0196751	0.0833982	0.0654041
Cfap69	1.87922	1.37089	1.75239	0.364021	0.446073	0.558497
Cgnl1	2.02006	1.6934	1.86174	3.74561	3.64592	4.10736
Ch25h	0.125662	0.445592	0.382986	2.15999	2.52121	1.99116
Chac1	4.42175	4.27036	3.83288	26.9321	26.2846	26.5083
Chl1	0	0	0	0.00291435	0.0342089	0.0203445
Chrdl1	28.9018	29.4196	30.8781	8.03269	7.8517	8.17853
Chrdl2	0.046337	0.103515	0.035306	0.269399	0.378093	0.432193
Chrnb1	0.134535	0.171741	0.12366	0.343315	0.291468	0.335914
Chrnb4	0.0404065	0.150444	0.0410498	0.275775	0.199819	0.213904
Chst3	0.190866	0.200233	0.109757	0.0254889	0.0106854	0.0435755
Chsy1	20.2621	20.3625	21.1285	38.9556	39.3546	39.3644
Ciart	0.352605	0.319649	0.29592	1.03857	1.15237	0.989349
Ciita	0.00405241	0.0160941	0.00411692	0.0491693	0.0440882	0.126673
Cilp2	0.0915454	0.0908929	0.116253	0.351738	0.389333	0.55847
Cimap1c	0.359072	0.458373	0.448168	1.83606	1.31909	1.73792
Cimap2	0.592246	0.772503	0.790434	0.223093	0.37902	0.163934
Cited1	0.763366	1.07488	0.690916	0.266639	0.356911	0.335884
Ckap2	17.747	15.7271	18.2826	5.1629	5.06561	6.28681
Ckmt2	0.63182	0.522764	0.565464	0	0	0.0303377
Clca2	0.272663	0.251102	0.578095	0.0119867	0.0469002	0.0478153
Clca4	0.0283628	0.0187738	0.0432215	0	0	0.00476657
Clca4l	0.123017	0.175881	0.119976	0.0348274	0.0146003	0.0496171
Clcnkb	0.984043	0.987154	1.32086	0.360873	0.342912	0.375308
Cldn1	1.102	1.24732	1.19417	0.0371414	0	0
Cldn11	3.01103	2.20083	3.41042	0.194329	0.215433	0.193797
Clec10a	1.83346	2.11601	1.71936	5.30798	5.42462	5.78328
Clec2d	0.822233	0.599362	0.761306	2.52568	1.8941	1.97303
Clec3b	9.15719	9.25985	11.2912	2.17427	3.24996	2.63121
Clec5a	0.0203159	0.201711	0.030959	0.390292	0.783642	0.655534
Clec7a	0.137337	0.0743774	0.152208	1.20559	1.08666	1.34706
Clic6	0.0937009	0.0930331	0.314135	0.0568453	0.0185349	0.0283448
Clip1	14.9298	15.0366	15.2557	5.72065	5.75091	6.09423
Clmn	0.332473	0.445549	0.407902	0.15798	0.152735	0.130068
Cmahp	0.0191077	0.0682973	0.0349413	0	0	0.00770683
Cmklr1	0.434226	0.446071	0.30574	1.19761	1.15659	1.09896
Cnga4	0.281524	0.419277	0.531154	0	0.00994431	0
Cnksr2	3.22067	3.39576	3.29171	1.33308	1.31361	1.28528
Cnn1	24.1674	27.3306	27.0372	133.013	130.11	123.769
Cntn3	0.00275649	0.00273684	0	0.0250841	0.0136315	0.0222359
Cntn6	0.385914	0.377915	0.306127	1.04767	0.789517	0.655664
Cntnap2	0.0170654	0.0190617	0.00866853	0.053922	0.0316471	0.070982
Cobl	3.96724	4.02305	3.95931	1.39627	1.44471	1.41844
Cobll1	0.943733	0.737609	0.801175	0.417678	0.342352	0.370435
Col11a2	0.0465394	0.0436406	0.0788005	0.091499	0.176447	0.0990696
Col18a1	24.0471	24.1386	22.7244	55.5046	56.5289	51.5758
Col1a1	2526.78	2495.83	2367.83	5956.1	6023.94	5759.44
Col1a2	1863.53	1878.73	1837.64	3599.66	3596.01	3538.28
Col23a1	0.640609	0.680325	0.881473	3.24274	2.89527	2.72282
Col24a1	0.0569833	0.0665613	0.0374585	0.162682	0.082881	0.121677
Col27a1	0.712282	0.686707	0.846847	1.50824	1.23794	1.57177
Col3a1	981.164	957.657	955.513	1845.93	1803.33	1837.66
Col6a1	642.141	654.187	625.304	189.134	182.088	177.135
Col6a2	472.04	486.4	451.71	184.552	187.844	176.46
Col6a5	0.0222801	0	0.00282935	0.087295	0.168025	0.0954806
Col9a2	0.152246	0.0875141	0.211653	0.988442	1.29973	0.848377
Comp	0.30599	0.125098	0.0457149	0.31849	0.445056	0.526338
Corin	0.0179867	0.0280634	0.018273	0	0.00254138	0
Coro2b	1.02116	0.994875	0.804	2.36187	1.91896	2.29748
Coro6	1.23422	0.733695	1.20595	0.309998	0.357658	0.237806
Cox6a2	0.225937	0.314058	0.459068	4.43189	7.1061	6.60684
Cpe	55.6535	57.4175	58.8424	170.959	172.138	170.148
Cped1	2.48482	2.58381	2.64379	0.931452	1.0409	0.981271
Cpm	0.525411	0.431129	0.573477	1.03177	1.34423	1.11213
Cpxm2	0.0847747	0.0323733	0.0264998	0.243963	0.161242	0.42741
Crabp1	3.06327	2.56878	2.35505	7.70142	7.5538	6.05242
Crip1	15.0811	16.9287	16.2482	31.9542	28.5016	34.2881
Crisp3	0.158277	0.0942893	0.0803983	0.40009	0.32874	0.271316
Crispld2	26.5533	26.4369	25.3406	8.98372	8.74855	8.81672
Crocc2	0.261473	0.170882	0.400135	0.0635848	0.108027	0.0767602
Cryab	156.284	168.835	162.881	31.0086	30.1183	29.815
Cryba4	0	0.0445255	0	0.453435	0.5766	1.06265
Csf1	314.413	303.354	312.2	130.936	132.75	129.033
Csf1r	2.81337	3.19236	3.09147	6.62974	6.18975	5.26842
Csf2	0	0	0	0.217155	0.053104	0.487261
Csf2rb	0.229329	0.305318	0.32829	1.11196	1.53617	0.940736
Csmd2	1.33447	1.28419	1.25664	0.0830336	0.126908	0.0966071
Cspg4	0.935168	0.931413	0.801144	1.64213	1.84695	1.73814
Cspg5	0.564487	0.770638	0.757804	2.34419	2.16343	2.40892
Csrp1	230.637	237.39	222.653	469.194	464.237	432.137
Csrp3	0.381907	0.328627	0.569047	0.0257434	0.125908	0.0256729
Cst7	1.60243	1.02947	0.976762	0.571848	0.242392	0.228112
Cstf2	21.9692	20.9592	22.7933	8.65023	8.54989	8.47124
Ctf1	1.04822	0.613042	1.02114	2.51174	3.03919	3.80796
Ctnna2	0	0	0.00564808	0.0224854	0.0989761	0.00560596
Ctsc	1.07434	1.21354	1.40384	3.49104	3.74209	4.0192
Ctso	16.2807	14.9241	16.0677	6.20873	6.0883	5.93053
Cwh43	0	0	0	0.00513433	0.0602672	0.0307216
Cxcl1	62.279	55.9137	61.6977	120.066	121.161	129.948
Cxcl13	2.101	1.41849	1.89965	5.07718	5.65211	4.5972
Cxcl14	2.17781	2.49607	2.06399	0.42858	0.766172	0.545311
Cxcl2	0.27882	0.511075	0.392204	1.32285	1.80308	1.23272
Cxcl3	32.7007	31.1034	34.3612	86.7585	85.5671	89.7766
Cxcl6	42.0106	44.2899	46.8294	244.717	238.054	280.864
Cxcr4	0.277263	0.770802	0.239425	1.33163	1.23401	0.950557
Cyb561	0.272253	0.177634	0.331904	0.0235953	0.0230803	0.0627484
Cybb	3.71226	3.28734	3.73172	13.3346	13.5011	13.7589
Cyfip2	0.121174	0.165427	0.103868	0.321617	0.400738	0.244371
Cyp11a1	0.0208895	0.145184	0.0636661	0.359068	0.227267	0.421275
Cyp26b1	2.97149	3.13115	3.07695	0.694562	0.597052	0.892062
Cyp2d4	2.41536	2.71705	1.85341	0.662512	0.432035	0.414555
Cyp2j3	0.0113104	0.0393041	0.0057452	0.205849	0.234916	0.108345
Cyp2s1	0.0755286	0.31246	0.0639425	0.528212	0.329931	0.431566
Cyp4b1	0.777907	0.571337	0.801117	3.93276	3.85747	4.60968
Cyp7b1	1.44347	1.26405	1.43001	2.61986	2.89078	3.31784
Cyth3	22.3302	21.4362	21.6276	9.14037	8.97226	8.68355
Cyth4	0.648372	0.677193	0.940991	2.5542	2.17365	2.08021
Dact1	0.243025	0.283874	0.256575	1.55626	1.60713	1.85471
Dact2	0.0795461	0.28959	0.1293	0.327082	0.398619	0.251324
Dbil5	1.89594	1.96609	1.66931	0.639004	1.08343	0.59477
Dbp	10.3984	10.9475	10.6219	23.7394	25.5773	22.4375
Dcdc2	0	0.00321915	0	0.00983487	0.0320674	0.0196159
Dchs1	0.36445	0.399134	0.264786	2.5259	2.5385	2.42098
Dcn	44.6308	41.4782	47.1392	88.0593	89.6125	98.5901
Dcstamp	0.0217731	0.0108089	0.0221197	0.308211	0.107673	0.16466
Dctpp1	8.85646	9.30204	5.80001	3.95939	3.33004	3.87474
Dcx	0.00246084	0.0024433	0.0100001	0.0223937	0.0462438	0.0322578
Dcxr	20.9325	21.89	19.8296	9.59304	8.95347	7.81239
Ddias	1.2548	1.26698	1.46924	0.652294	0.329547	0.629062
Ddit3	10.3634	11.0386	12.1065	57.6208	58.4044	62.5648
Ddit4l	3.94637	4.70189	3.3219	0.342019	0.613351	0.284235
Ddx11	1.12113	1.23682	0.956739	0.49374	0.389328	0.617996
Dennd1c	0.0740716	0.0653721	0.0167224	0.191398	0.18722	0.107885
Dennd3	0.275729	0.337927	0.161943	0.55323	0.562461	0.516961
Depp1	5.6242	5.18761	4.54732	1.0263	1.1191	0.822145
Dhcr7	5.46287	5.5013	4.96055	10.4607	10.6091	9.4019
Dhfr	7.07711	6.72767	6.97306	2.48675	2.86685	3.31502
Dio3	2.42886	2.22216	2.13163	0.887193	1.11938	0.769359
Dipk1c	0.909452	1.26846	1.16591	0.240837	0.278413	0.371182
Diras2	0.00510087	0.0405161	0.0259103	0.144411	0.0756748	0.097725
Dlk1	0.912746	0.818256	0.918273	0.259843	0.148997	0.0982909
Dlk2	0.547745	0.699224	0.476969	0.0158238	0.0773921	0.110463
Dlx3	6.43897	6.78431	5.55889	2.39957	2.58635	2.20336
Dmp1	0.0299779	0.0212601	0.0565594	0	0	0
Dnaaf3	1.58442	1.45951	1.26088	0.596309	0.722589	0.594675
Dnah3	0.244975	0.197426	0.273115	0.041819	0.0251731	0.0497245
Dok1	14.0025	14.3485	12.8378	5.55316	4.80847	5.60536
Dok2	0.759052	0.600123	0.756856	2.11059	1.87684	1.9489
Dok7	0.0690705	0.0214307	0.035085	0.00436488	0.00426962	0
Dpep1	28.5735	29.2201	27.5453	11.0654	11.411	10.3825
Dpp4	0.12402	0.132608	0.159915	0.014469	0.0141532	0.0144294
Dpys	0.346203	0.302071	0.309083	0.0636456	0.0311283	0.0528927
Draxin	1.1135	1.30693	1.22841	0.0967249	0.068122	0.0694512
Dtx4	2.23849	2.16934	2.09142	1.02142	0.836387	0.922157
Dusp6	40.9469	40.4415	41.5987	15.2027	14.3965	15.5197
Dusp8	0.415988	0.389556	0.264131	1.71112	1.69248	1.6826
Dync1i1	1.02397	1.127	1.15316	2.83315	2.32383	2.54525
Dyrk3	0.36579	0.301176	0.317231	0.0721669	0.123536	0.170927
E2f7	0.615189	0.48951	0.367897	0.167638	0.211447	0.131983
E2f8	0.743869	0.45561	0.677195	0.351648	0.25798	0.219178
Eaf2	0.0855582	0.0849484	0.13038	0	0	0
Ebf4	0.13701	0.160325	0.104393	0.356226	0.440404	0.300976
Ece2	3.95966	4.43276	3.64472	2.10259	1.92529	1.65469
Edar	1.64227	1.43948	2.02686	0.875666	0.590071	0.66627
Edn1	2.75962	3.02748	3.09775	7.44077	7.59849	7.5578
Eef2k	17.4928	18.4936	17.558	8.56059	8.48103	7.61287
Efcab3	0.00208288	0.0155103	0.00952219	0.00105302	0.00103003	0
Efemp1	7.06813	7.67566	7.20757	2.3316	1.8438	1.99559
Egfl6	15.8324	13.6935	14.0203	36.7836	35.3544	35.7693
Egflam	0.171435	0.0851066	0.0256124	0.20393	0.244362	0.376236
Egr1	31.3464	29.5747	30.4996	11.1364	12.3683	11.9074
Elavl2	0.102825	0.0340306	0.0812478	0.288798	0.361594	0.259206
Elf5	0.0401734	0.127639	0.122439	0.251843	0.397334	0.372679
Elmo1	0.0696323	0.0643126	0.0773213	0.129351	0.115316	0.173084
Eln	10.6387	10.9623	9.95039	0.766924	0.919793	0.73822
Emb	319.167	320.676	330.403	108.032	106.915	113.681
Emp1	605.079	578.551	615.926	212.08	207.849	222.798
Enho	0.273593	0.518591	0.151608	0.729306	1.03318	0.902865
Enox1	0.143278	0.103283	0.0996981	0.0317525	0.00776487	0.0296864
Enpp5	0.748113	0.689086	0.586041	1.62222	1.6403	1.08154
Entpd1	0.749205	0.793826	0.908814	2.26694	2.70409	2.83014
Entpd3	0	0.00644271	0	0.196832	0.166865	0.0523448
Epas1	98.2203	102.667	96.3288	26.6897	25.1117	24.9131
Epha3	0.446941	0.411831	0.444256	0.100785	0.0826847	0.123205
Epm2a	0.354013	0.282344	0.294794	0.69829	0.522332	0.58519
Eppk1	0.0392186	0.0502963	0.0348626	0.074352	0.111518	0.108751
Eps8l3	0.209156	0.432636	0.265607	0.00881169	0.0430969	0
Erbb3	0.117163	0.0712976	0.0729526	0.202537	0.254187	0.213415
Erc2	0.117423	0.113435	0.16443	0.0320887	0.018833	0.0448011
Ercc6l	0.627473	0.570104	0.823889	0.185546	0.292736	0.447671
Ereg	3.5205	2.22692	3.69192	1.34921	0.393122	1.231
Erfe	0.403336	0.266974	0.200861	0.919591	0.719617	1.00479
Errfi1	183.904	181.678	185.511	62.9436	62.3334	62.93
Ervv-2	0.388648	0.342194	0.476782	0	0	0
Esam	0.0161958	0.00804017	0.0987216	0.147382	0.200229	0.171474
Esco2	0.983157	0.938363	0.973032	0.365566	0.376408	0.530857
Esyt3	0.478296	0.582119	0.757602	0.171604	0.233985	0.274851
Etl4	0.0595037	0.0960043	0.0734047	0.174049	0.174454	0.168215
Evpl	0.100284	0.169637	0.143388	0.0337996	0.0220413	0.0149809
Exo1	0.581335	0.475073	0.458843	0.203468	0.238832	0.266038
Exosc6	1.89091	2.04358	2.44802	4.82211	5.22993	4.62329
Exph5	0.0385159	0.0247444	0.0805598	0.169521	0.210637	0.262723
F13a1	0.553038	0.494865	0.679759	0.0690351	0.0135057	0.0481921
F5	0.318654	0.206745	0.285264	0.985727	0.904925	1.07528
Fa2h	0	0	0	0.009615	0.122267	0.057532
Fabp4	522.776	510.961	530.839	83.0408	72.9186	80.3927
Fabp5	77.2677	82.4076	82.9739	184.794	189.441	177.353
Fam107b	2.99457	2.85478	3.7694	1.21547	1.14356	1.20289
Fam110a	1.65941	2.06133	1.56487	3.51371	3.71669	3.63914
Fam111a	1.50559	1.18535	1.64411	0.442613	0.373914	0.775795
Fam124a	1.88326	2.18375	1.66187	0.298833	0.19714	0.332667
Fam180a	19.072	19.3695	21.7307	0.410945	0.327536	0.834817
Fam25a	1.83966	1.94439	2.35126	7.26041	8.45191	6.2831
Fam72a	1.44128	1.72836	1.84455	0.643483	0.388771	1.34006
Fam78a	0.134	0.118262	0.0655454	0.180652	0.348509	0.235205
Fam81a	0.501	0.675083	0.648338	0.361834	0.176969	0.306716
Fancb	0.422314	0.362449	0.545386	0.173698	0.141589	0.252615
Fblim1	8.77924	9.1171	8.51521	17.4463	18.3027	16.8975
Fbln5	40.081	42.1741	39.239	81.8603	83.5544	74.0255
Fbln7	0.186875	0.185544	0.0781737	0.36679	0.684952	0.509882
Fbxl22	0.00530902	0.0316271	0.00539353	0.144936	0.131272	0.139186
Fbxw10	0.0142769	0.00708757	0.0290083	0.0721777	0.141205	0.14396
Fcgr1a	2.05292	1.81373	2.2977	8.12704	7.5195	8.38546
Fcgr2b	2.13206	2.30684	2.13129	5.94216	5.17039	5.80874
Fcgr3a	0.161351	0.200251	0.163919	0.876898	0.75802	0.366068
Fcrl2	0.00994048	0.00986963	0	0.140713	0.235958	0.140328
Fez1	5.90368	5.36789	5.77195	2.2786	1.6952	2.00565
Fgr	0.131854	0.0723474	0.0951772	0.810442	0.854527	0.906187
Filip1l	2.42886	2.18802	2.32267	4.92434	4.59916	5.35225
Fkbp5	57.9262	55.6884	58.7078	3.56825	3.46043	3.24013
Flna	300.051	309.241	287.323	636.125	632.132	598.245
Flt3	0.0645535	0.00640934	0.0524649	0	0	0
Fmnl1	0.356779	0.307004	0.277885	0.919896	0.905701	0.665547
Fmo1	0.228617	0.399931	0.176958	0.165113	0.0215346	0.0109774
Fmo2	4.10876	4.16107	4.09069	0.249266	0.394765	0.355118
Fmo3	2.4064	2.1795	2.78062	0.185736	0.0545047	0.00926135
Fmod	0.764073	0.335393	0.482084	1.63458	1.96483	1.81663
Fmr1	13.9443	11.7529	16.1565	4.25713	4.19277	4.80207
Fmr1nb	1.29292	0.302049	0.82416	0.230698	0.275811	0.0766888
Fn3k	0.183197	0.0909457	0.0620378	0.00771804	0	0.0230907
Fnbp1l	3.21614	2.87305	3.00526	5.98208	6.33631	7.22733
Fndc1	4.42312	4.63228	4.39881	17.6364	18.1331	16.8548
Fndc10	1.86799	1.46222	1.67751	0.0580162	0.145028	0.218572
Fosb	0.755899	0.553009	0.781405	0.140792	0.17051	0.173836
Fosl1	24.7034	24.3718	23.0426	5.75859	6.87216	6.60424
Foxo3	24.8633	23.0846	22.6132	9.01964	9.31985	9.21749
Foxq1	2.65189	2.30275	2.97721	0.490825	0.63126	0.978961
Fras1	0.0401704	0.0162491	0.0710394	0.0616774	0.0882897	0.129018
Frem1	0.0844586	0.103588	0.0832795	0.301402	0.21129	0.280538
Frrs1	21.7068	21.4452	22.1253	8.29996	8.62313	9.3852
Fst	34.83	32.0297	35.8885	11.1935	10.5952	10.3754
Fth1	14914.3	16299.9	14676.1	3809.54	3841.85	3548.32
Fxyd2	4.55894	6.45633	5.6009	13.7931	12.6182	11.8666
G0s2	2.79332	2.32192	2.5738	5.78008	3.66221	5.33848
Gabrb2	0.00304074	0.00301906	0	0.0245962	0.0270669	0.0245288
Gadd45a	41.2661	42.4643	45.6116	97.8773	103.483	106.9
Galnt14	0.0436403	0.084992	0.0358091	0.0186684	0.019921	0.0135398
Galnt16	1.86217	2.02431	1.7948	0.772458	0.840604	0.751083
Galnt18	0.0376592	0.0186954	0.0191294	0.752035	1.0336	0.882881
Galnt3	0.498575	0.41387	0.464994	1.59499	1.92395	1.94501
Galnt6	0.0332715	0.0385401	0.0563353	0.364447	0.301648	0.346674
Gata4	0.0600462	0.245097	0.0881141	0.0269838	0.0197961	0
Gcgr	0.909316	0.947529	0.777448	0.127444	0.124663	0.0272347
Gclc	34.4953	35.3103	38.1593	12.333	10.7774	11.7104
Gda	358.846	342.161	369.468	60.742	59.4831	65.4442
Gdf6	2.01325	2.22266	2.28951	0.486119	0.178316	0.181795
Gem	0.101817	0.0112324	0.126425	0.354602	0.302106	0.39926
Gfpt2	5.13457	3.92985	4.74929	1.48107	1.43333	1.53201
Gfra1	1.34556	1.39634	1.40995	0.269965	0.379115	0.253232
Gfra2	1.59339	1.13299	1.38549	0.0914598	0.110109	0.147338
Gfra3	0	0	0	0.175609	0.0229035	0.175128
Gja1	497.557	481.175	504.474	990.285	982.681	1016.49
Gja4	1.1169	1.13851	0.816968	2.42425	1.72327	2.07224
Gja5	103.194	107.914	102.554	7.31732	7.77646	7.67734
Gjb2	5.61827	5.16502	6.37713	11.7559	12.5284	11.3652
Gjb3	3.99275	3.48377	3.71214	0.856359	0.729969	1.11022
Gjb4	1.31365	1.3848	0.708474	0.245973	0.256645	0.196239
Gldn	1.12198	0.730772	1.1672	0.444703	0.381732	0.135761
Glipr1	10.7375	11.6804	11.2779	21.8003	20.4994	25.4071
Glra1	0.689551	0.815043	0.982221	1.60839	1.84753	1.913
Glrx	139.503	145.723	141.889	16.4665	16.858	18.4263
Gls2	3.48328	3.6354	3.62926	10.2629	10.8001	9.46699
Glul	236.763	246.613	238.234	38.7923	40.3806	38.6925
Gna14	3.75517	3.91153	4.09226	1.78656	1.86067	1.81142
Gng13	0.487206	1.49957	1.3364	2.41384	2.50572	2.94763
Gngt2	0.0611727	0.125812	0.0621466	0.349025	0.384624	0.37891
Gnrh1	1.76773	1.93988	1.08697	0.470361	0.644133	0.422165
Gp6	0.0416765	0.0118227	0.0544371	0.0963193	0.182546	0.0960554
Gpc2	0.0943606	0.0562128	0.0383451	0.159015	0.211541	0.196639
Gpnmb	138.827	140.405	133.064	296.072	290.625	294.661
Gpr146	0.121758	0.159355	0.101206	0.369333	0.330254	0.407385
Gpr162	0.212657	0.174737	0.171344	0.333652	0.384391	0.488015
Gpr171	0	0.0303936	0	0.247616	0.0908294	0.200637
Gpr4	0.176112	0.183599	0.0984034	0.0178069	0.0174183	0.00887905
Gpr83	0.064943	0.0451361	0.0461838	0.203561	0.128463	0.0982272
Gpr85	0.0385687	0.0471309	0.054253	0.131991	0.0909641	0.158554
Gprc5c	4.12133	4.23479	3.94204	12.6822	11.8479	11.6517
Gprin1	0.0531564	0.00586417	0.0660032	0.143326	0.0993066	0.244177
Grap	0.230882	0.318384	0.364867	0.129693	0.114176	0.0258676
Greb1	0.529801	0.561641	0.66158	0.0530108	0.0573122	0.0779072
Grem1	224.436	221.806	233.346	512.681	512.565	542.505
Grhl1	0.330082	0.291884	0.303899	0.0782227	0.168334	0.046805
Gria2	0.37968	0.43866	0.378711	0.16752	0.126312	0.226228
Grk3	0.0210629	0.0104564	0.0392301	0.0780889	0.124993	0.127432
Grpr	1.14046	0.736917	0.809195	0.0183038	0.107426	0.164283
Gsg1	1.47113	1.66931	1.54793	0.0177081	0.0346433	0.105958
Gsg1l	0.151568	0.183929	0.171089	0.437052	0.44417	0.333966
Gsta1	306.038	305.603	307.378	25.678	24.2885	26.453
Gsta2	0.523123	0.628741	0.867105	0.111355	0.163387	0.11105
Gsta5	2.03171	1.2452	2.06406	0	0.0248081	0
Gstm1	45.5336	47.6095	41.9308	17.3837	16.8335	16.5621
Gstp1	500.322	516.811	494.179	106.724	104.091	101.34
Gstt2	8.91577	10.5886	9.45833	3.64061	4.23947	4.16659
Gtse1	21.0755	19.759	18.286	9.37319	8.9346	9.47532
Gucy1a1	0.765638	0.716989	0.804343	0.0879712	0.137682	0.10089
Gucy1b1	11.346	11.3259	11.8514	1.98766	2.09229	2.33888
Gvin1	0.00279752	0.0111103	0.0142103	0.113144	0.226884	0.234131
Gvinp1	0	0	0	0.0125842	0.0123095	0.0156871
Gzmb	0.44918	0.573401	0.228165	1.47606	2.18957	2.05435
H19	6.52806	6.79499	6.88029	1.83293	1.65191	2.03329
H2bc18	0.517411	0.439578	0.493133	0.835979	1.07097	0.94664
H2bc6	0.867521	0.506669	1.0887	1.08355	1.66556	3.03593
H3c13	0.201517	0.20008	0.460631	1.32442	2.04292	1.37159
Hapstr2	0	0	0.0118149	0.270457	0.0690143	0.0938144
Has2	4.97504	5.71121	5.90717	15.1426	15.087	16.5197
Havcr2	0.0342047	0.0254707	0.0304056	0.121047	0.152235	0.112093
Hck	0.529508	0.640024	0.725046	1.38504	1.71913	1.85713
Hcls1	1.14377	2.09652	1.66476	3.9476	3.00214	2.67258
Hdac9	0.0846805	0.077198	0.0555275	0.0295784	0.0258873	0.0349311
Hdc	0.576285	0.471795	0.493018	1.11426	0.779961	1.12141
Hgd	1.44128	1.13118	1.1156	0.305339	0.339404	0.152251
Hhex	0.133024	0.146751	0.135141	0.478229	0.321607	0.253363
Hif1a	34.8155	33.7449	37.912	107.317	105.658	117.117
Hif3a	0.233841	0.189961	0.251962	0	0	0
Higd1b	1.49342	1.4183	1.3193	0.415801	0.406726	0.480134
Hist1h2ah	0.237733	0.236039	0.434732	1.7307	0.517284	1.53419
Hist1h2ao	0.908372	2.28481	1.6611	3.30648	3.71347	2.62572
Hk3	0.826237	0.741192	0.611135	2.98992	2.92467	3.02558
Hmga2	16.4397	14.843	17.9321	4.72825	5.24812	5.32609
Hmmr	5.57264	6.23274	6.6161	2.48693	2.76669	3.0946
Hopx	8.60404	8.08095	8.22684	0.470252	0.581751	1.03448
Hoxc11	1.24345	0.931171	0.952786	2.01376	2.15741	2.02949
Hoxd13	0.219331	0.160959	0.125943	0.00964211	0.0377267	0.0384628
Hpgd	5.04271	4.01381	4.67938	1.02545	1.08666	1.00844
Hpse	20.1469	19.4489	19.1721	6.83603	7.72419	6.77926
Hrh4	0.311946	0.103241	0.271639	0	0	0
Hs3st1	1.34128	1.04257	1.37349	0.10266	0.132131	0.115849
Hsd17b1	0.133211	0.0826634	0.186081	0.370401	0.296441	0.822723
Hspa1l	0.575762	0.562726	0.493533	2.09214	1.59269	1.73263
Hspb7	330.197	353.094	325.69	35.8647	35.2143	33.7554
Htr1b	0.519741	0.67978	0.67525	0.212228	0.380593	0.262039
Htr2b	0.29475	0.319746	0.299442	0.81681	0.718005	0.616433
Hvcn1	1.01806	0.912989	0.900817	4.00129	3.31307	3.6923
Hycc1	28.5226	28.803	28.653	10.1469	10.8985	11.6119
Ibsp	93.1254	87.2602	95.3646	0.27164	0.120778	0.258582
Id1	24.4013	26.3966	24.8523	4.41803	5.28027	4.1577
Id2	44.8045	43.8116	43.8769	16.8863	14.9523	15.928
Id4	16.7029	17.9574	16.5546	5.96325	6.26519	6.69579
Ido2	0.284118	0.221645	0.257715	0.559162	0.572048	0.654831
Ier3	41.9868	40.5956	36.4114	85.3211	88.1299	82.7824
Iffo2	6.36008	6.19125	6.52872	12.4507	12.0354	12.9392
Ifi27l2b	9.9753	12.7191	10.0274	115.885	113.771	117.367
Ifit1	0.343827	0.193447	0.3493	0.706884	0.521426	0.566269
Ifit2	3.90705	2.75609	2.72841	6.24496	6.14298	7.70434
Ifitm10	0.973998	1.2505	1.09187	0.475431	0.265746	0.829725
Igf1	2.42322	2.75001	2.78558	8.12794	8.05812	9.32994
Igf2r	48.4216	45.486	46.4953	96.6194	92.4463	97.3094
Igfbp2	0.237696	0.308618	0.482961	0.554626	0.831866	0.848097
Igfbp4	75.7287	76.2862	72.8991	235.575	231.245	223.256
Igfbp5	0.0436599	0.0144496	0.0443549	0.191295	0.388635	0.469591
Iglon5	0.0446478	0.0738826	0.0604781	0.1881	0.183995	0.150068
Igsf1	0.00427405	0	0	0.0345724	0.0211361	0.0215485
Igsf10	1.6324	1.60636	1.62644	8.14021	7.66596	8.55441
Ikzf2	2.33441	2.10417	2.13674	0.823809	0.774139	1.03155
Il10ra	0.0755615	0.122765	0.223315	0.388952	0.305729	0.20087
Il11	0.181807	0.0515747	0.114339	0.315133	0.41957	0.532512
Il13ra2	0.804014	1.02779	1.09249	0.294694	0.328023	0.435763
Il15	1.79599	1.92667	1.97139	0.605318	0.765655	0.832633
Il15ra	0.567538	0.406239	0.80452	0.293595	0.143594	0.0931607
Il17b	0.0203247	0	0.0206482	0.164404	0.221122	0.14346
Il17re	6.90984	7.99057	6.56937	3.27288	2.81406	2.42186
Il18r1	0.335299	0.37528	0.32825	0.123282	0.174857	0.165975
Il1a	0.0368389	0	0.00935634	0.353859	0.528313	0.59434
Il1f10	0.681976	0.731285	1.08082	0.0275822	0.0269802	0.16504
Il1r2	1.37198	1.37751	1.22155	0.34291	0.304933	0.497412
Il1rl1	26.4567	26.1395	28.0029	9.13736	9.09808	9.48456
Il1rn	539.774	551.131	534.613	61.0317	62.4897	60.9524
Il20rb	22.072	21.3061	21.6074	5.76986	6.61943	6.18738
Il34	0.0880089	0.0683856	0.174932	0.247616	0.219504	0.246937
Il36b	2.43359	2.54686	3.24076	0.399023	1.82147	0.82902
Il6	2.74169	1.30483	1.58833	24.7432	22.4328	26.092
Il7r	0.121092	0.184968	0.222382	0.353187	0.419181	0.601121
Ildr2	0.0169885	0.00749664	0.00191766	0.0400804	0.0466734	0.0970714
Inava	0.103173	0.135032	0.0809938	0.327184	0.361788	0.193881
Incenp	6.58486	5.97311	6.46406	2.39532	2.33533	2.72271
Inf2	57.8396	59.8984	55.5693	27.0696	27.1451	26.2685
Inhbb	30.3063	29.3399	28.9307	9.56737	9.86686	9.7774
Inhbe	0	0	0	0.100671	0.00895216	0.0273805
Insc	0.00512682	0	0.0130211	0.0440623	0.0380299	0.0361872
Iqgap2	0.223099	0.191974	0.207763	0.112789	0.0735516	0.078736
Irag2	0.0467538	0.067052	0.137217	0.131315	0.256898	0.214767
Irf4	0.00323738	0	0.0131557	0.0229135	0.0128077	0.0848742
Irgc	0.237538	0.332327	0.186474	0.633196	0.373762	0.566138
Irs1	1.1587	1.04945	1.24454	2.29397	2.29639	2.78268
Ism1	0.445048	0.56462	0.711691	0.0499994	0.0326054	0.0664832
Itga10	0.465293	0.527306	0.515672	0.0427694	0.0790235	0.0142174
Itga3	204.015	209.65	192.871	58.8489	58.4844	54.0366
Itga4	10.0668	10.0399	10.9072	0.635391	1.11306	1.05608
Itga7	6.86742	5.96844	5.1813	17.9189	17.6911	17.6355
Itga8	2.83605	2.61127	2.89351	5.50639	5.36624	5.78868
Itga9	0.116857	0.0757382	0.136855	0.297031	0.280917	0.258576
Itgad	0	0.00562427	0	0.131735	0.112052	0.062831
Itgax	0.0565113	0.057585	0.0528784	0.651087	0.686886	0.623811
Itgb2	2.82562	3.37817	2.81126	12.565	11.4819	12.0373
Itgb4	0.580107	0.489388	0.346672	0.161015	0.217501	0.244684
Itgb7	0.917876	1.29661	0.841514	0.369722	0.088568	0.150493
Itgbl1	99.3782	95.9995	107.087	45.0482	45.6611	48.9719
Itih5	0.357019	0.324434	0.316596	0.758683	0.664322	0.808469
Jade2	18.0511	17.8481	18.3955	5.80951	6.78409	6.44781
Jam2	0.142417	0.172825	0.166119	0.0533334	0.0365186	0.0904184
Kank4	0.0980735	0.10062	0.149452	0.555315	0.303931	0.342825
Kazald1	6.50656	6.54445	5.94913	2.15958	2.42023	2.79549
Kcne4	0.965983	1.10354	1.07004	2.43003	2.03742	2.29428
Kcnh2	0.0289524	0	0.0196089	0.146371	0.0524979	0.170298
Kcnh6	0.0162737	0.00403943	0.00413319	0.0699318	0.112668	0.0205118
Kcnip4	0.292818	0.261449	0.3146	0.155491	0.0895917	0.159313
Kcnj2	6.22051	5.89544	6.58503	2.70299	2.92365	2.97205
Kcnj8	0.233371	0.276267	0.656547	0.217814	0.0266325	0.108608
Kcnk3	0	0.0180379	0.00615221	0.0857235	0.0958316	0.073276
Kcnk5	0.0820262	0.128949	0.131942	0.711882	0.777473	0.723717
Kcnmb1	0.693705	0.553207	0.701	4.44353	4.83924	5.25364
Kcnmb4	0.795513	0.67369	0.546708	0.0236575	0.115706	0.0235927
Kcnn4	5.04618	5.66984	5.60428	2.46056	2.70217	2.55167
Kcnt2	0.110611	0.0366077	0.0749149	0.216225	0.233386	0.23794
Kctd15	12.9555	13.2131	13.0125	26.7632	24.4455	24.7249
Kctd19	0.170081	0.132158	0.232889	0.426189	0.577792	0.559239
Kctd4	0.0204005	0.0303827	0.00690843	0.0721954	0.104248	0.0959968
Kdm6b	2.23412	2.05316	2.29452	5.10611	4.78434	4.57699
Kif21b	0.491905	0.645306	0.547222	4.4921	4.51514	3.83116
Kif26b	1.25863	1.1812	1.23468	3.89079	4.11194	4.15174
Kif2c	3.19566	3.11545	3.2906	1.57903	1.3515	1.37787
Kif5c	3.07651	2.82596	3.32692	6.09851	6.035	5.60455
Klf10	8.19104	7.63637	7.56792	3.88833	3.47655	3.38992
Klf9	22.0093	19.2786	21.2322	7.4351	8.12747	9.85783
Klhdc9	0.368963	0.421284	0.196789	0.046633	0.1186	0.0837093
Klhl30	1.33442	1.02449	0.733005	3.25546	2.50149	2.64417
Klk6	0	0.0194776	0.0199297	0.317367	0.252233	0.395622
Knstrn	5.6065	5.24159	5.55119	2.54665	2.33625	2.23835
Kprp	3.57486	3.77488	4.17013	0.510295	0.806973	0.839681
Krt7	20.8839	22.4536	20.1015	8.89937	8.9513	9.38832
Krt75	0	0	0	0.0857857	0.0559423	0.00712922
Ksr1	1.92435	1.89194	1.84549	0.832678	0.937664	0.820901
LOC100125362	0.0277384	0.0137704	0.063405	0	0	0.00349623
LOC100359539	4.68239	5.24154	4.73828	1.92162	1.74347	1.5553
LOC100361636	0.404641	1.24545	0.534407	0.190931	0.333507	0.312813
LOC100362820	0.0174065	0.041212	0.0299261	0.0879998	0.0701877	0.0999099
LOC100363423	0	0	0.0266687	0.291968	0.155779	0.0794094
LOC100910319	2.47991	2.82392	2.66172	0.467494	0.15243	0.127149
LOC100910497	0.377391	0.69501	0.513259	2.11102	2.1673	1.86587
LOC100910945	0.211099	0.523985	0.250202	0.818204	1.07873	1.20621
LOC100911237	0.0725314	0.130935	0.127276	0.246681	0.234775	0.239356
LOC100911848	1.61529	1.37736	1.27419	0.384291	0.3947	0.344915
LOC102546327	1.95627	1.85987	1.79054	0.326558	0.547596	0.437319
LOC102546356	0.168944	0.180643	0.330065	0.407345	0.462721	0.53727
LOC102546539	0.0550656	0.130374	0.129097	0.256973	0.548814	0.363048
LOC102546856	1.91137	2.09602	1.50707	0.74997	1.04397	0.661618
LOC102547513	0.223917	0.141477	0.107537	0.0123494	0.064426	0.00821037
LOC102547703	0.0534928	0.0303495	0.0213496	0.0695408	0.060465	0.0924671
LOC102548022	0.0474323	0.0188377	0.019275	0.302145	0.103208	0.0932647
LOC102548553	0.0110131	0.0109346	0.0391596	0.1726	0.179726	0.172128
LOC102548586	0.286864	0.284819	0.327859	0.114812	0.159593	0.0783405
LOC102548759	0.169534	0.116893	0.133959	0.0190464	0.0372615	0.0332399
LOC102548914	0	0	0	0.14408	0.0939572	0.0957904
LOC102549016	0.257956	0.181417	0.289361	0.0978085	0.0637826	0.124635
LOC102549024	0.0729808	0.0563583	0.0164761	0	0	0
LOC102549299	0.0666054	0.148794	0.101499	0	0	0
LOC102549608	0.128525	0.183233	0.133919	0.0433177	0.0684476	0.003323
LOC102549616	0.0293017	0.0266685	0.0248068	0.199985	0.125583	0.172353
LOC102549726	21.5172	22.0382	21.703	57.0909	56.9747	60.4832
LOC102549805	0.0118919	0.00737945	0.0135913	0.0511022	0.0279338	0.0254811
LOC102549824	0.0229267	0.0379389	0.0414075	0.0412116	0.146132	0.120727
LOC102549828	0	0.214502	0	1.00484	0.641027	1.04565
LOC102549861	0.0203947	0.030374	0.0207193	0	0	0
LOC102550111	0.0196174	0.0194776	0.0132865	0.0528945	0.122883	0.12528
LOC102550137	0.0146478	0.0363586	0.014881	0.096269	0.152117	0.13293
LOC102550162	0.0220785	0.0219212	0.0142736	0.261798	0.216382	0.28132
LOC102550182	0.00563409	0.0186465	0.00953964	0.018989	0.0575812	0.0662795
LOC102550225	0.214236	0.496322	0.269468	0.618906	0.676029	0.740653
LOC102550226	0.53373	0.264963	0.172527	0.0245301	0.119974	0
LOC102550498	0.938628	0.896771	0.503773	0	0.140128	0.303581
LOC102550503	0.47377	0.576062	0.470849	0.00694254	0.00339551	0.0415411
LOC102551701	0.042558	0.0528184	0.02432	0.00806831	0	0.0107283
LOC102551884	0.131239	0.113158	0.0491208	0.192062	0.208365	0.261185
LOC102551936	0.0381292	0.0757148	0	0.809611	1.09363	0.730498
LOC102552402	0.0540188	0.0357558	0	0.273095	0.231517	0.290504
LOC102552523	0.0948212	0.168117	0.103211	0.0273929	0.026795	0.0273178
LOC102552566	1.01158	0.709674	0.910761	0.0796208	0.041937	0.0732948
LOC102552728	0.103631	0.171488	0.213753	0.0444534	0.059013	0.110829
LOC102552762	0.0608695	0.0725227	0.0123677	0.221565	0.180608	0.245509
LOC102552952	0	0	0	0.301528	0.0294948	0.0150351
LOC102553046	0.00716436	0.0071133	0	0.0869278	0.0779447	0.00722413
LOC102553329	0.34626	0.265854	0.473164	0.116409	0.163038	0.138076
LOC102553528	0.284269	0.222093	0.236717	0.0848149	0.092182	0.103379
LOC102553847	0.233834	0.343204	0.268542	0.0205593	0.0804426	0.112767
LOC102553881	0.0701924	0.178102	0.0950797	0.181374	0.300835	0.29884
LOC102554055	0.0226688	0.0119569	0.0179919	0.058018	0.0532485	0.0435728
LOC102554173	0.00208389	0	0.015878	0.0168564	0.0216412	0.0304685
LOC102554746	0.208721	0.18037	0.18063	0.00390816	0.0152914	0.0194872
LOC102554945	2.93752	1.4141	2.17039	0.270015	0.176082	0.807827
LOC102555109	0.103943	0.165123	0.675825	0.651609	0.904679	0.775596
LOC102555426	0.374839	0.288299	0.337899	0.5605	0.600483	0.777227
LOC102555751	0.0526768	0.0104603	0.0160546	0.165113	0.0781496	0.159349
LOC102555849	0.0373726	0.0106018	0.0271197	0.15655	0.0264023	0.188422
LOC102556096	2.34234	2.09669	2.83582	0.337461	0.432126	0.293705
LOC102556139	0.0900313	0.0825135	0.077393	0.231081	0.417827	0.32123
LOC103690819	0.284594	0.211924	0.224072	0.0215818	0.0140738	0.0143484
LOC103691483	2.21619	1.73715	2.15667	0.400988	0.41531	0.705688
LOC103691564	0.792798	0.662515	0.879248	0.374084	0.385522	0.2265
LOC103691630	0.295158	1.2699	0.866252	0.165799	0.291925	0.198414
LOC103691735	2.68901	3.7452	4.02184	10.1581	7.09214	9.18878
LOC103691977	2.98028	4.07208	4.94436	2.23932	1.13579	1.62664
LOC103692665	0.0713519	0.0180877	0.0740301	0.155035	0.132132	0.177572
LOC103693092	0.0983037	0.0883953	0.101753	0.0112524	0.0513652	0.0504971
LOC103693105	0	0	0	0.242321	0.568879	0.193326
LOC103693260	0.100284	0.104311	0.15363	0.00804752	0.00157438	0.00160509
LOC103693415	0.0968122	0.0303544	0.0569414	0.005152	0.0201582	0
LOC103694285	0.0121302	0.0843065	0.0862634	0	0	0
LOC108348805	0.331703	0.214453	0.462373	0.0623981	0.137332	0.0816731
LOC108349032	0.0454706	0.123559	0.0850951	0.0193583	0.0307707	0.031371
LOC108349102	0.0467256	0.0347945	0.0652705	0.00590561	0	0
LOC108349559	0	0	0.0131019	0.0912797	0.0510214	0.104034
LOC108349679	0.179111	0.154266	0.135923	0.0610944	0.0565595	0.0402553
LOC108349848	0.454379	0.15038	0.615484	2.19505	1.0486	0.763617
LOC108350210	0	0	0	0.0330261	0.0124251	0.015201
LOC108350538	0	0	0	0.00110101	0.00969278	0.00768592
LOC108350659	0.0628647	0.117631	0.100711	0.00488948	0.0478277	0.0463228
LOC108350947	0.242543	0.270916	0.169403	0.0306547	0.0599714	0.0152854
LOC108351167	0.146262	0.0968131	0.0330201	0.509391	0.4822	0.42606
LOC108351529	0.0451391	0.0400997	0.018504	0.0104093	0.00469943	0.0167689
LOC108351956	0.013488	0.00669594	0.00685137	0.0477327	0.0800416	0.0884036
LOC108351970	0.324574	0.30147	0.382925	0.60343	0.56955	0.749582
LOC108352161	4.17019	3.36852	3.73394	11.5776	11.255	9.97793
LOC108352213	0.045888	0.045561	0	0.23199	0.635395	0.416438
LOC108352424	0.133978	0.171957	0.165989	0.0561693	0.0646394	0.0593105
LOC108352579	0.00286038	0.00283999	0.0290591	0.069412	0.0792133	0.0778746
LOC108352784	0.282176	0.426337	0.324059	0.84353	1.04353	0.841219
LOC108352908	0.219243	0.187655	0.360981	0.0993735	0.0672955	0.0991012
LOC108352946	0.23731	0.366517	0.294662	0	0.0782367	0.0531754
LOC108352965	0.134356	0.258949	0.160582	0.0639289	0.0234501	0.0159384
LOC120093214	0.760371	0.622504	0.406566	0.296738	0.197906	0.147962
LOC120093566	0.0423582	0.126169	0.17213	0.428289	0.377048	1.36677
LOC120093589	0.04845	0.00859013	0.017579	0.0769819	0.0650333	0.102943
LOC120093674	0.148133	0.103968	0.124544	0	0.00252603	0.00257532
LOC120093678	0.0282407	0.0218084	0.0350658	0.0111045	0.00620696	0.00474604
LOC120093688	0.0369895	0.0367259	0.0100209	0.00249337	0.00243895	0.00248654
LOC120094090	1.33974	0.812119	1.14617	0.698706	0.404495	0.412387
LOC120094147	1.71581	1.44805	2.0046	5.23356	5.93956	6.83401
LOC120094181	0.285969	0.141965	0.122019	0.0693952	0.0452538	0.0749722
LOC120094374	0.306231	0.119448	0.222219	0.873611	0.5084	0.419067
LOC120094634	0.782751	0.474939	0.198803	0.263817	0.0215049	0.043849
LOC120095041	0.225507	0.24629	0.263461	0.0684039	0.0557591	0.102325
LOC120095051	0	0.00339193	0	0.0379967	0.0135154	0.0551165
LOC120095081	0.496479	0.275771	0.433839	0.098293	0.188862	0.262563
LOC120095090	0.0959604	0.0714573	0.012186	0	0	0
LOC120095174	0.521965	0.141339	0.771308	1.00755	1.83033	1.7225
LOC120095187	0.257567	0.27952	0.316435	0.738893	0.509492	0.591911
LOC120095650	0.290207	0.340527	0.241222	0.0400134	0	0.119711
LOC120095877	0.00416284	0	0.00422911	0.193619	0.131752	0.0965441
LOC120095902	0.148829	0.150152	0.0951086	0.657756	0.707504	0.728569
LOC120095913	0.884716	0.447191	0.326836	0.032529	0.143186	0.194639
LOC120096270	0.202378	0.0669785	0.274133	0	0	0
LOC120096300	1.58783	1.47971	1.40086	0.352079	0.52348	0.280891
LOC120096345	2.03705	2.64331	1.70066	0.632182	0.718125	0.589776
LOC120096582	0.00246597	0.00734518	0.00250522	0.0423873	0.0121948	0.0273519
LOC120096893	1.93586	1.88621	2.28223	0.774187	0.850165	0.983291
LOC120096943	0.231441	0.282821	0.452165	0.594034	0.66324	0.759955
LOC120097004	0.901376	0.796198	0.978879	2.88503	2.94503	2.72669
LOC120097012	0.0711058	0.127078	0.0144475	0	0	0
LOC120097019	0.119162	0.0556766	0.0783324	0	0.0138655	0.00706802
LOC120097074	2.21413	1.78455	3.25499	0.632115	0.824426	0.919309
LOC120097083	0.126876	0.204704	0.016112	0	0	0.0159918
LOC120097103	0.15457	0.220611	0.137402	0.009768	0.0382192	0.00974123
LOC120097371	0.159547	0.403225	0.412585	0.0439964	0.129108	0.0658137
LOC120097433	0.843016	0.554518	0.695855	0	0.0208445	0.0106256
LOC120097779	0.219505	0.20388	0.0503547	0.057276	0.0420195	0.0142798
LOC120097862	0.0144291	0.0429789	0.117271	0.525222	0.342506	0.349189
LOC120097864	0.955623	0.632541	0.377547	0.161041	0.105017	0.107066
LOC120097894	1.26164	1.00659	1.67082	0.273355	0.267389	0.113586
LOC120098117	0.483229	0.197558	0.375411	1.98314	1.65872	2.55095
LOC120098269	8.06298	9.52671	9.37051	21.5472	23.5719	18.57
LOC120098275	0.159988	0.317695	0.270891	0	0	0
LOC120098297	0.146268	0.170854	0.0961507	0.0521977	0.0255293	0.0260274
LOC120098556	0.261527	0.239689	0.102188	0	0.0198971	0.0202853
LOC120098589	2.19869	1.51132	1.11685	0.299267	0.0836387	0.170541
LOC120098859	0.843085	0.934673	0.798894	0.317281	0.29166	0.339285
LOC120098893	0.24048	0.218227	0.212785	0.0732072	0.0767244	0.0312885
LOC120098922	0.137221	0.227071	0.356258	0	0.060319	0
LOC120098963	0.0973078	0.0772914	0.108743	0.18366	0.256645	0.147179
LOC120098975	0.231942	0.210263	0.245879	0.336484	0.438854	0.579608
LOC120099107	0.0175589	0.00435845	0.00891923	0.0532622	0.0477581	0.110659
LOC120099247	0.145952	0.00966076	0.0741375	0	0	0.0196226
LOC120099266	0.00947508	0.0282226	0	0.076643	0.131198	0.124204
LOC120099355	0	0	0.00764384	0.0152154	0.0595331	0.091042
LOC120099388	0.0254058	0.0756742	0.103241	0	0	0
LOC120099844	1.11977	1.31688	0.938792	0.0439694	0.0537623	0.043849
LOC120099880	0.0267378	0.0758492	0.0194025	0.10814	0.109557	0.142507
LOC120099936	1.25725	1.27801	2.15919	0.54481	0.740166	0.694238
LOC120099960	0.319976	0.337551	0.216713	0.0943635	0.131863	0.154601
LOC120099968	0.637783	0.33549	0.690846	0.209263	0.271535	0.225725
LOC120100018	0.0377844	0.112545	0.0639765	0.203756	0.298964	0.241298
LOC120100636	0.574714	0.43367	0.537154	0.139464	0.090947	0.0463607
LOC120100749	0.755045	0.344845	0.598311	1.05354	1.34419	1.70541
LOC120100856	0	0.00134041	0	0.00682518	0.00934671	0.0163355
LOC120100865	0.197483	0.352936	0.321003	0.818679	0.839875	0.398261
LOC120100915	0.24964	0.311825	0.359968	0.130278	0.0823018	0.197589
LOC120101096	0.171343	0.215923	0.314665	0.11994	0.0130358	0.0398705
LOC120101595	0	0.0200978	0.00514109	0.0409341	0.050051	0.081644
LOC120101618	0.0306855	0.0130572	0.031174	0.00443235	0.00216781	0.00442021
LOC120101622	0.0173086	0.240594	0.0351684	0	0	0
LOC120101634	0.779598	0.444662	0.749881	1.68554	1.4847	1.80636
LOC120101643	0.0892293	0.257726	0.18954	0.0328076	0	0.00817943
LOC120101644	0.286816	0.274224	0.0647514	0	0	0
LOC120101819	0.214014	0.128565	0.175398	0.0691001	0.0818219	0.0816048
LOC120102233	0.0635089	0.126112	0.150546	1.19867	1.18298	1.12068
LOC120102367	0.062974	0.0312626	0.191929	0	0	0
LOC120102407	0.618365	0.505236	0.90305	0.182361	0.229347	0.175366
LOC120102428	0.0404756	0	0.0587428	0	0	0
LOC120102910	0.0934282	0.0724706	0.121611	0.0413291	0.0231012	0.0382719
LOC120102967	0.0208741	0.00690845	0.0282752	0	0	0
LOC120102992	30.5379	28.5571	26.3546	118.615	109.139	113.972
LOC120103154	3.55019	2.73817	2.81219	6.04517	7.42971	7.4709
LOC120103476	0.10345	0.110614	0.0970129	0.0201154	0.0393528	0.00401206
LOC120103510	0.886024	0.667365	0.620778	0.216245	0.332396	0.154037
LOC120103511	0.0406028	0.228443	0.137497	0.0410541	0.013386	0
LOC120103553	0.0108057	0.0107287	0.00997974	0.0228448	0.0281757	0.0475455
LOC120103570	0.323095	0.229137	0.187565	1.8201	1.14127	1.02391
LOC120103610	1.85992	2.65162	2.47092	0.699194	0.754686	1.17816
LOC24906	0.597386	0.647049	0.703448	1.49633	1.71881	1.35533
LOC292543	0	0	0	0.00897689	0.00878097	0.152189
LOC497940	0.327047	0.296883	0.607549	1.11487	1.09978	1.18719
LOC498675	0.108865	0.108089	0.0184331	0.256842	0.3948	0.475686
LOC502684	0.133433	0.0361313	0.160203	0.490602	0.479894	0.721655
LOC680438	0.24322	0.205974	0.319766	0.0144661	0.0212255	0.0504926
LOC680920	0	0	0	0.243821	0.11925	0.121577
LOC681325	0.00871484	0	0.0531214	0.140987	0.068955	0.131813
LOC686087	0.234332	0.232662	0.31381	0.549262	0.800644	0.698122
LOC689800	5.501	5.38264	5.44458	1.99735	1.77854	1.75071
LOC691392	0.0257933	0.115242	0.0917136	0.339039	0.280618	0.260085
LOC691418	2.48086	2.63079	2.19226	0.786666	1.25588	1.03615
Lama1	0.0214326	0	0.0169351	0.069828	0.0518168	0.045624
Lama4	38.8846	36.7231	36.4107	73.0981	71.9517	72.5506
Lama5	8.21523	8.15668	7.31633	2.86271	2.6014	2.54447
Lamb3	0.108642	0.158963	0.110371	0.219699	0.220559	0.294051
Lancl3	0.0313785	0	0.0637561	0.425145	0.372417	0.525229
Laptm5	4.03398	2.99541	3.20426	11.52	12.1728	9.71393
Lat2	0.0896902	0.089051	0.0101242	0.241832	0.226698	0.271316
Layn	6.23213	5.27351	5.40084	1.9747	2.08018	1.84712
Lbp	10.1583	12.7823	11.5354	22.5758	21.4443	21.6481
Lck	0.0265649	0	0.0269878	0.241741	0.0963378	0.062502
Lcn2	2.49244	2.74367	1.73395	7.23171	7.47581	7.10263
Lcp1	2.78604	2.64074	2.65069	8.17634	7.65424	7.70165
Lctl	0.130021	0.107578	0.0293535	0.175288	0.414366	0.196658
Ldb2	2.1058	2.12271	2.16382	5.36364	5.11144	5.20307
Lect2	1.53042	1.37616	1.3201	0	0	0.0291168
Lep	0.129389	0.0214112	0.124146	0	0	0.0144965
Lgals2	0.598367	0.275833	0.542761	0.799486	1.09908	1.09897
Lgr5	14.4152	14.3394	13.9339	6.10872	6.57079	6.46932
Lhx2	1.89951	1.59047	1.71632	0.68151	0.926365	0.794388
Lhx3	0.00688721	0	0.0419811	0.104456	0.0749294	0.138893
Lif	1.5227	1.51185	1.36668	3.9179	3.57119	3.66583
Lifr	2.08442	1.84669	1.96489	0.778185	0.68191	0.842745
Lilra5	0	0	0	0.0241101	0.11792	0.0360661
Lilrb3	0.0154323	0.0357519	0.0104519	1.14948	1.04807	1.29675
Lilrb4	1.77399	1.98524	2.09242	7.72204	7.79141	9.73222
Limk1	10.3314	12.5826	10.6757	4.08262	4.02176	4.86038
Lingo3	0.0495101	0.0737359	0.088022	0	0	0
Lipg	0.0126961	0	0.0128982	0.141209	0.0502281	0.0896141
Lmcd1	0.541054	0.494787	0.578597	2.31783	2.61931	2.31148
Lmntd2	0	0	0	0.0187115	0.0915156	0.0279903
Lmo1	0.814581	0.706697	0.490102	0.303865	0.265945	0.159491
Loxl3	209.551	219.451	210.456	53.6193	55.2112	54.3599
Lrch2	0.331197	0.209693	0.28283	0.567837	0.474738	0.527561
Lrp8	6.2702	6.34009	5.90106	2.50125	2.48763	2.35118
Lrrc10b	0.0963312	0.0191289	0.019573	0.214284	0.209607	0.602237
Lrrc15	0.352957	0.461556	0.419796	1.63642	2.02217	1.75346
Lrrc24	0.31571	0.255411	0.463285	0.827603	0.543548	0.896078
Lrrc25	0.254279	0.348644	0.436696	0.771315	0.778432	0.909611
Lrrc66	0.0769023	0.00763542	0.0937518	0.147738	0.144514	0.263649
Lrrn1	0	0	0	0.0123171	0.0361448	0.0614168
Lsamp	0.842809	0.789902	0.91937	0.130717	0.177043	0.218101
Lsmem1	0.139798	0.0867508	0.0887644	0	0	0
Lurap1l	8.31768	8.2999	7.85561	3.10625	4.52668	3.01345
Lvrn	4.36249	3.81473	4.13885	15.1903	15.4134	16.6684
Ly49si1	0.248084	0.0410526	0.15402	0.376261	0.449838	0.319641
Lypd6	0.0464684	0	0.0209814	0.224483	0.291076	0.19263
Lyve1	3.31002	3.23293	3.65207	0.241282	0.33499	0.178525
Mab21l1	3.18021	3.79692	3.32142	0.591021	0.597719	0.859128
Mab21l3	0.241245	0.305395	0.232831	1.34159	1.36003	1.53861
Madd	0.58219	0.510913	0.503693	1.29885	1.14419	1.35968
Mal2	0.00851735	0.0338266	0.112488	0.137792	0.303266	0.369301
Mamdc2	0.00674017	0.0133843	0.0273899	0.136301	0.146659	0.115539
Map2	0.0503419	0.0586759	0.0511433	0.170409	0.099581	0.0904887
Map2k6	0.221349	0.219772	0.218626	0.0839284	0.0699342	0.114698
Map3k6	2.80374	3.027	3.04591	1.43121	1.21921	1.09007
Map7d2	4.0568	3.52584	3.63721	1.43977	1.43134	1.69955
Mapk12	0.47859	0.178192	0.316035	0.907328	0.674519	0.9531
Mapk6	17.2284	15.9716	17.3784	33.0766	32.5211	33.6903
Marchf11	0.116929	0.536944	0.400919	0.0886717	0.0144561	0
Marcks	13.2836	12.2834	14.8417	27.859	29.9851	30.1246
Mastl	1.92903	1.96125	1.96497	1.13387	0.707195	0.835107
Mat1a	1.21988	1.32765	1.17575	2.8543	2.81521	3.0988
Matcap2	0.731805	0.57265	0.711952	0.169308	0.17788	0.400222
Matk	0.0589849	0.217525	0.0171211	0.664564	0.600056	0.603267
Matn4	0.547533	0.430802	0.325353	0.783421	0.684582	1.18754
Mcam	9.53966	10.1344	9.62537	22.2953	23.2981	22.3081
Mcemp1	0.0301729	0.0149789	0.0153266	0.419489	0.313345	0.296641
Mcoln2	0.00898604	0.053532	0	0.318007	0.293291	0.317135
Mcoln3	0.0224758	0.111578	0.274003	0.499962	0.622428	0.362612
Mdfi	0.212018	0.168406	0.206778	0.540224	0.603924	0.51309
Mdk	1.49322	1.95156	1.60987	3.05044	3.28527	3.42619
Megf6	0.769893	0.780331	0.79437	3.67331	3.85092	3.37617
Meox2	1.38044	1.16135	1.07055	2.39733	2.14699	2.31638
Mepe	4.40985	2.99211	4.35002	0	0.0805562	0.105593
Mest	1.296	1.47804	0.640522	0.389578	0.623579	0.264894
Mex3a	1.02505	0.687257	0.780064	2.35589	1.76951	2.05576
Mex3b	0.960775	0.691251	0.5234	1.68244	2.45137	2.21839
Mex3d	5.51431	5.32803	4.97797	10.4851	11.1933	10.8967
Mfap2	0.268635	0.209566	0.233924	0	0.037956	0.0773931
Mfap5	14.3705	14.4218	15.2507	34.4255	31.6187	31.6114
Mfrp	2.08955	2.72299	1.93911	0.518035	0.476922	0.476097
Mgat4c	0.0117905	0.00292661	0.00598909	0.0268234	0.026238	0.0326943
Mid1ip1	9.71236	9.4245	9.60793	19.4414	20.2895	20.6035
Miga1	0.116301	0.0396936	0.0923068	0.154342	0.233649	0.318832
Minar1	0.192847	0.316345	0.242766	0.0551058	0.0580495	0.0887732
Minar2	0.0801632	0.159184	0.223958	0.0202635	0.0198213	0.010104
Mip	0.00984132	0.0390847	0.129974	0	0	0
Mlana	0	0	0	0.313779	0.153466	0
Mllt11	8.57404	8.70211	8.09464	16.8658	16.6176	14.9333
Mme	18.0936	15.7233	18.8678	33.0773	33.1683	37.2498
Mmp12	0.938668	0.931977	1.08792	76.984	83.8423	86.0114
Mmp13	1.6744	1.68957	1.68257	5.10663	5.88621	5.99188
Mmp3	7.90555	7.7856	8.7994	3.4461	3.33288	3.28163
Mmp8	0.079324	0.00984483	0.0100734	0.150385	0.196138	0.159972
Mmp9	0.499741	0.543435	0.410993	5.07701	5.40556	4.5352
Mnda	41.7356	39.0386	45.7517	15.485	16.839	18.0437
Mns1	1.42465	1.16565	1.52774	0.400134	0.534915	0.518749
Mocos	2.88689	3.49465	2.31161	0.920268	1.32214	0.989446
Mpeg1	1.92074	2.10265	1.7623	0.769089	0.644059	0.535232
Mpp7	0.144783	0.115001	0.20172	0.451724	0.33549	0.504711
Mpped2	0.191326	0.203063	0.261396	0.660405	0.443712	0.558809
Mpzl2	0.640148	0.606696	0.443413	1.19155	1.21591	1.28364
Mrap	3.77408	4.56178	3.76747	0.11614	0.210981	0.215097
Mreg	3.79167	3.53563	3.40624	0.898725	0.767831	0.709069
Mroh2a	0.104023	0.0748791	0.0607654	0.00788842	0.0334371	0.0262227
Ms4a18	0.150669	0.0230146	0.0470977	0.257812	0.389741	0.210359
Ms4a4a	4.53172	4.96186	4.444	1.62282	1.17654	1.25662
Ms4a6bl1	5.00911	4.80371	4.20732	1.34263	1.33933	2.05483
Msmo1	35.9599	36.6374	35.5207	69.209	66.9598	69.0752
Msr1	1.10121	1.20493	1.43609	2.5382	2.79177	3.35611
Mt1	225.46	236.424	213.899	72.2549	76.2768	72.2411
Mt2A	969.385	965.729	972.067	258.292	261.643	257.21
Mtbp	1.41942	1.21652	1.43862	0.555123	0.562873	0.729134
Mthfd2	17.1971	18.6326	17.2852	56.8159	55.6716	52.3359
Mtss2	11.0454	12.0876	10.4645	20.995	22.325	20.9404
Mtus2	0.0300642	0.0316058	0.0574924	0.0822543	0.113692	0.0766792
Mvd	9.94651	11.357	9.76802	21.3014	21.547	19.8361
Mybpc3	0.105335	0.00550444	0.0112644	0.145745	0.361893	0.257149
Myc	24.1433	26.6213	25.3185	9.37414	8.73957	9.58293
Mycl	0.115149	0.300863	0.0800402	0.0245112	0.0899111	0.0183331
Myh11	6.24436	5.94653	6.78033	20.7845	19.4875	21.2759
Myl4	0.890287	1.18992	0.434837	1.38489	1.778	1.98533
Myl9	352.536	384.637	345.995	945.249	960.779	880.785
Mylk	4.39422	4.3201	4.9284	17.932	17.2166	18.1582
Mylk3	0.163782	0.133576	0.166389	1.07641	1.28433	1.22092
Myo15b	0.203277	0.156714	0.187077	0.0169265	0.0733243	0.0409946
Myo16	0	0	0	0.0158133	0.0309364	0.018924
Myo1g	0.156951	0.113333	0.210184	0.634781	0.49392	0.640236
Myo7a	0.0450007	0.0407948	0.0457171	0.124633	0.108367	0.080888
Nags	0.672995	0.679335	0.923007	0.374261	0.277343	0.237514
Nalcn	0.99155	0.899161	0.956968	0.467866	0.304013	0.563233
Nat8f3	0.168428	0.0975496	0.128332	0	0.00694097	0.0212292
Nat8l	0	0.0286788	0.0660251	0.182536	0.264257	0.276694
Nav3	2.02434	1.82425	1.9251	0.77133	0.928043	0.971426
Ncald	3.98413	3.887	4.09232	9.24052	8.09886	8.5742
Ncf1	1.75828	1.45479	1.09728	5.13029	4.94379	4.68566
Ncf4	0.474427	0.160584	0.383393	0.599624	0.522552	0.935025
Nckap1l	0.592835	0.83802	0.627792	1.40204	1.37641	1.22089
Ncr2	0	0	0	0.0471983	0.115421	0.0706035
Ndnf	3.6428	3.28024	4.4369	7.50772	6.86392	7.98317
Ndrg2	25.7507	28.254	27.7425	5.53746	6.4362	5.39235
Ndufa4l2	26.1493	26.4858	23.1086	48.2514	51.0046	49.1199
Neb	0.141008	0.159003	0.13916	0.0549931	0.0308811	0.0294524
Nebl	0.418105	0.355555	0.500951	0.0170617	0.0296699	0.0132339
Necab2	0.571284	0.313459	0.717837	0	0.0594764	0
Necab3	0.4168	0.216768	0.28229	0.0301023	0.0785208	0.0900595
Nefh	0.406652	0.477163	0.48198	1.65091	1.85864	2.03158
Nefm	0	0.0076728	0	0.0546963	0.0382161	0.0467541
Nek2	2.91238	2.50004	2.71988	0.805203	1.40273	1.17773
Nell1	0.00119884	0.0249961	0.00608961	0.00121216	0.0011857	0
Nes	0.145461	0.17965	0.20905	0.441233	0.571962	0.586698
Neurl3	0.370616	0.299831	0.22312	0.985412	1.1404	0.775097
Nexn	5.55123	4.91298	7.41422	11.9801	13.1696	15.5515
Nfam1	0.745771	0.840132	0.968909	1.86339	2.2128	1.62691
Ngf	6.21499	6.99635	6.13607	17.8343	17.2719	16.5939
Nipal1	0.635191	0.302083	0.569385	0.134926	0.121423	0.0699696
Nkd2	4.54944	4.50202	4.54517	11.6577	10.2187	10.687
Nlrc5	0.52432	0.618726	0.672383	0.282455	0.221033	0.184176
Nlrp3	1.47361	1.189	1.29309	4.39022	4.48589	4.45773
Nog	2.09439	1.97838	2.3937	0.338238	0.474706	0.659957
Nos1ap	0.345038	0.26645	0.262898	0.0484545	0.0710955	0.0579861
Notum	0.149547	0.169692	0.115754	0.00720041	0	0
Nox1	3.924	4.3507	4.66024	1.30125	1.46026	1.36137
Npas4	0.0218434	0.0780757	0.0532587	0.172272	0.129625	0.18942
Npb	0.11764	0.324447	0.205827	0.0925142	0.103423	0.0197702
Npnt	21.0705	21.0982	22.9985	48.3708	47.197	46.7279
Nptx1	0.61408	0.493143	0.573397	0.0136964	0.102714	0.113824
Npw	1.52262	1.26494	1.95724	0.942573	0.491734	0.657994
Npy	1.04401	0.497555	1.06063	3.42019	5.08028	3.41082
Nqo1	894.682	921.616	909.041	68.6999	66.0585	68.1837
Nr2f2	21.2703	20.977	22.1281	9.27303	9.94493	9.80471
Nr4a1	2.95876	2.91353	2.64351	7.19634	6.95109	6.21211
Nr4a3	0.224168	0.286701	0.231597	0.618511	0.653864	0.678115
Nrep	0.717522	0.636849	0.651632	4.90259	4.60205	4.42875
Nrg1	0.791221	0.74973	0.871791	0.360812	0.362391	0.395163
Nrip2	0.185262	0.262773	0.250948	1.92673	2.25987	1.99261
Nrp2	31.6626	29.8703	30.8991	63.1281	62.8177	66.2846
Nrros	0.306064	0.359134	0.301514	1.17222	1.15581	1.10354
Nrsn2	0.152	0.0838426	0.0343155	0	0	0
Nt5c1b	1.77301	1.85123	2.44038	0.115659	0	0.126876
Ntn1	0.926963	0.84366	0.892156	5.6647	5.78233	5.28432
Ntng1	0.515836	0.728331	0.707805	0.314973	0.202086	0.388416
Ntrk2	0.0576544	0.0205489	0.0450556	0.142001	0.109659	0.0998736
Nuf2	7.50805	5.91358	5.71394	2.66909	2.79452	2.60828
Numbl	15.081	17.9753	15.7287	7.33907	7.28892	6.71005
Nupr1	51.1071	50.63	47.9949	306.488	323.705	329.906
Nxf2	0.0202464	0.0100511	0.0205688	0.21495	0.0800986	0.0408307
Nxph3	2.4291	2.52042	2.13428	0.685935	0.411237	0.176531
Nyx	2.55883	3.11312	3.39286	0.498019	0.225752	0.302838
Obp3	0.0213895	0.276082	0.10865	0	0	0
Ogdhl	8.71908	8.87411	8.88874	2.7093	2.78238	2.81828
Ogfrl1	15.3412	15.4784	15.7713	5.82679	6.65602	7.14165
Olah	0.341227	0.427177	0.226082	0.0150009	0.132061	0.0448793
Olfm1	6.23317	6.33147	5.83457	2.76805	2.70118	3.22165
Olfml2b	12.2492	12.1619	12.3907	34.052	34.7525	32.8434
Omd	10.5455	9.19255	10.58	2.46982	2.2081	2.33063
Onecut2	0.00988888	0.00140263	0.00143519	0.0257111	0.00978056	0.0242162
Oplah	9.71623	9.77977	9.30342	4.30621	4.60129	4.37374
Or51e1	0	0	0	0.282216	0.191706	0.2189
Orc1	0.778289	1.03032	1.07561	0.482088	0.214979	0.240384
Orm1	6.06431	6.20262	7.36825	0.0924377	0	0
Osgin1	2.40147	2.77163	2.63395	0.757834	0.862322	0.771181
Osm	0.0122972	0	0.0249859	0.142989	0.0972998	0.198396
Otud7a	0.0358761	0.0512934	0.0204104	0.00870595	0	0.0086821
P2rx6	0.23663	0.18947	0.27917	0.0926165	0.0301984	0.0461814
P2ry6	0.300726	0.502876	0.410031	1.76039	1.4402	1.60395
P3h2	1.87382	1.19388	1.42519	2.87742	3.77595	2.99079
Pacsin1	0.100162	0.238675	0.198425	0.394972	0.336819	0.318142
Palm3	0.287117	0.195986	0.154959	0.0181443	0.0976155	0.0452364
Palmd	2.47068	1.33708	1.40043	6.27214	5.39063	6.78957
Pamr1	5.75067	7.37788	5.88621	2.80221	2.50977	2.71593
Panx2	0.615202	0.755361	0.410302	0.166193	0.190435	0.179944
Paqr4	7.7782	8.26036	6.85477	2.60049	2.33776	2.35188
Pax8	0.076197	0.37827	0.125791	0.385219	0.593478	0.537829
Pbk	2.18754	2.08207	2.63618	1.2966	0.783364	1.10289
Pc	21.218	23.3019	18.2809	9.83218	9.95421	9.94742
Pcbd1	6.77174	7.49577	7.36762	3.37724	3.25827	2.90661
Pcdh1	1.96936	2.26349	1.78088	0.903906	1.00524	0.877186
Pcdh9	0.136986	0.0318321	0.065142	0.389003	0.322859	0.437899
Pcdhb15	0.237781	0.316355	0.241566	0.572208	0.58794	0.374033
Pcdhb16	0.104156	0.0482599	0.0917059	0.140419	0.425797	0.301073
Pcdhb16l	0.262879	0.336934	0.131104	0.483273	0.406544	0.583159
Pcdhb17	0.185992	0.179931	0.218023	0.400228	0.391493	0.432793
Pcdhb2	0.152927	0.261497	0.138099	0.541193	0.520979	0.616812
Pcdhb3	0.398498	0.276041	0.169469	0.637187	0.769935	0.532649
Pcdhga8	0.302984	0.140385	0.251376	0.602491	0.594336	0.493911
Pck2	25.1303	26.2962	26.3341	53.0764	52.8719	51.4558
Pcp4l1	0.342611	0.151186	0.348065	1.20605	0.702816	0.511806
Pcsk1	0.159544	0.102499	0.100111	0.289422	0.324875	0.298092
Pcsk9	0.0497292	0.00705354	0.00721727	0.265776	0.281054	0.193413
Pde10a	0.327832	0.368788	0.334692	1.08913	1.24905	1.08615
Pde1a	0.393852	0.280532	0.395773	2.09936	2.15516	2.52096
Pde2a	0.660133	0.365321	0.533215	6.04005	6.26679	5.48881
Pde3a	0.521527	0.524449	0.495866	1.05014	0.939046	1.04277
Pde4b	2.48532	2.74336	2.83959	6.34356	5.87936	6.34054
Pde4d	1.01028	0.856899	0.9911	2.2052	2.12156	2.45867
Pdgfd	4.00463	4.11613	3.74441	0.861914	1.15851	1.05125
Pdk2	17.9448	18.293	17.93	8.08704	9.44422	7.63284
Pdk4	1.429	1.5343	1.55303	0.18481	0.0986057	0.268079
Pdlim7	9.75536	9.86211	9.17605	24.098	24.6704	22.9448
Pdp1	10.8523	9.96233	10.8935	4.84484	4.59052	5.09795
Peli2	0.247775	0.155921	0.244629	0.0388143	0.127708	0.0175945
Penk	49.0118	50.3774	48.3004	21.9766	23.6182	21.9744
Per1	6.84256	7.18654	6.68357	2.05941	1.87018	2.0764
Pgd	328.909	334.597	331.78	139.819	140.821	141.621
Pgf	16.4369	15.4474	15.8983	6.49465	7.35678	6.17134
Pgr	7.66736	7.20861	7.56267	1.41378	1.22061	1.94607
Phgdh	9.86385	11.8657	10.3869	30.8374	32.8552	30.6151
Phgr1	0.319976	0.462102	0.384173	0.058824	0.11508	0
Phlda1	9.60988	8.82741	8.20877	20.2398	22.8369	20.7117
Pi16	2.17788	1.75753	1.99028	4.18295	4.52443	5.00378
Pik3ap1	0.15472	0.231932	0.151019	0.625757	0.642105	0.562862
Pik3c2b	0.0552174	0.0373799	0.0968938	0.119275	0.146461	0.121479
Pik3r1	16.3835	15.5013	16.8758	7.00567	7.2508	8.17208
Pik3r3	5.66304	4.9581	5.53846	10.4768	11.3065	10.9499
Pik3r5	0.171205	0.14423	0.115954	1.04389	0.990324	0.889325
Pilra	0.707987	0.624836	1.29866	4.69282	3.94853	4.62048
Pilrb1	0	0.00547496	0	0.0167266	0.0927155	0.0667231
Pilrb2	0.0274689	0.245458	0.153484	0.388839	0.326016	0.457019
Pim1	0.672883	0.884765	0.8314	2.92371	2.17641	2.16386
Pinlyp	0.823821	1.66228	1.86286	0.537404	0.788513	0.0803898
Pir	16.6528	17.7443	18.4761	7.51889	7.04326	7.80209
Pira2	0.0545238	0.0492139	0.0906412	0.285672	0.313755	0.224913
Pkia	0.0863775	0.123283	0.0493608	0.332974	0.213578	0.244963
Pknox2	0.097892	0.0624821	0.0781396	0.207387	0.119872	0.150413
Pla2g2d	0.0118332	0	0	0.119647	0.105332	0.0715915
Pla2g4a	3.82796	4.01644	4.32195	8.24806	7.15874	8.42773
Pla2g7	25.1212	24.5809	28.4277	9.05889	8.27788	9.54018
Plac8	5.70872	5.08835	4.64627	0.131186	0.0962418	0.523304
Plat	21.8069	18.1564	20.3471	37.0735	38.6741	40.0545
Plcb1	0.321305	0.270186	0.179864	0.530409	0.554503	0.479367
Plcb2	0.0135873	0.0494652	0.0736195	0.444207	0.327004	0.223778
Plcd4	0.279622	0.156611	0.269505	0.0797441	0.0886406	0.0867552
Plcl1	0.275907	0.233523	0.284894	0.0548799	0.0402616	0.0775335
Plcxd3	0.0125814	0.0249835	0.102254	0.470686	0.0497744	0.190296
Plek	0.321909	0.142051	0.242247	0.940295	0.872605	0.961763
Plekha6	1.48578	1.61669	1.57214	0.364226	0.316321	0.255731
Plekhg1	0.415881	0.407554	0.504807	1.08129	0.817309	1.14913
Plekho1	1.82496	2.44269	2.03002	3.77222	5.83757	4.75186
Plin1	1.19048	0.973405	0.827035	0.327479	0.251071	0.22949
Plp1	0.182872	0.23967	0.141195	0.443769	0.390676	0.486809
Plxnb1	0.182688	0.16254	0.202468	0.424611	0.405958	0.272729
Plxnd1	2.88382	3.04462	2.70848	6.35027	6.42359	5.79805
Pmepa1	18.9717	16.6083	15.305	46.5801	46.0259	42.7438
Pnma2	0.0627145	0.0691862	0.099109	0.14796	0.199867	0.27403
Podn	2.84976	2.56493	2.60513	7.51865	7.06753	7.19103
Polr3g	2.31282	1.86865	1.75718	0.790675	0.924169	0.761779
Pon3	0.619678	0.210484	0.745511	1.10473	1.06449	1.01949
Postn	22.9685	22.3765	24.557	53.0959	52.8593	56.6479
Pou2af3	0.28734	0.434731	0.361418	0.145267	0.189462	0.0965792
Pou6f1	1.1848	1.34139	1.29348	3.39721	3.23911	3.30944
Ppargc1a	0.0237067	0.0117689	0.0337177	0.0695134	0.117235	0.124303
Ppl	13.1981	12.2357	13.0061	1.76863	2.02832	2.34538
Ppm1j	0	0	0.0528105	0.131402	0.11568	0.196562
Ppp1r14a	2.40653	3.20811	3.35097	6.61918	7.35688	7.95859
Ppp1r3g	0.19956	0.14645	0.264439	0.754473	0.961125	0.629921
Prdm8	0.840791	0.617654	0.706053	1.258	1.56702	1.42118
Prelp	50.4032	53.4373	50.0869	19.4012	18.3231	18.8532
Prex2	0.799229	0.785	0.763933	0.171615	0.246492	0.147314
Prg4	3.16359	3.06977	3.15144	0.378458	0.491907	0.599738
Prkar2b	13.4408	12.3557	11.8026	5.52263	5.0663	5.25445
Prkcb	0.0301409	0.0374076	0.0535863	0.167617	0.0819796	0.205149
Prkch	0.215622	0.224971	0.100245	0.635579	0.693999	0.560135
Prl8a2	0.0252702	0.426532	0.256725	0.0255511	0	0
Prodh	0.602755	0.787971	0.581733	0.0203151	0.109295	0.0709081
Prok1	0.0551654	0.0365148	0.0186812	0	0	0
Prom1	1.12089	0.938532	1.06527	0.0678965	0.199244	0.114587
Prr33	0.0861026	0.0854889	0.0218683	0	0	0
Prr5l	0.200123	0.103864	0.120137	0.367904	0.454342	0.550344
Prrt2	0.137379	0.194857	0.438635	0.0892964	0.0388211	0.0989464
Prss35	4.42979	4.1598	4.93686	10.3637	9.85629	10.6284
Prss42	0.272404	0.0624145	0.255453	0.0423741	0	0
Prune2	0.876366	0.922363	1.01013	2.15014	2.06014	2.34916
Psph	10.172	11.6455	9.47419	21.6311	21.8286	20.1553
Psrc1	1.13873	0.577598	1.00597	0.463058	0.281565	0.436828
Pstpip1	0.241791	0.339524	0.333368	0.104776	0.181065	0.121904
Ptger3	0.206452	0.346604	0.293635	0.0872941	0.0222754	0.0870549
Ptger4	0.486539	0.524937	0.50417	1.16427	1.17415	0.955031
Ptgr1	152.456	152.106	160.745	33.0678	32.3665	34.5149
Ptgs2	7.5217	7.3286	8.22333	13.9102	14.1785	16.1551
Pth1r	0.22376	0.291364	0.238502	0.0445076	0.0544202	0.073976
Ptprc	0.558492	0.458274	0.543937	1.12006	1.12757	1.08442
Ptprn	34.8754	35.7944	32.7122	88.1947	89.0118	80.3057
Ptpro	0.309335	0.21539	0.130601	0.53212	0.437067	0.32812
Ptprt	0.0528794	0.0350017	0.0338245	0.170302	0.160775	0.238955
Ptpru	0.948832	0.760902	0.776504	0.122997	0.200521	0.188079
Ptx3	32.293	27.8228	30.8441	12.6426	13.2796	15.3629
Pxn	20.098	19.9034	18.8638	8.22857	8.59791	7.67249
Pzp	0.0150817	0.00998278	0.00510725	0.0406647	0.064638	0.126729
Qprt	0	0.0821052	0.0280037	0.181163	0.163577	0.222359
RGD1307182	0.00674401	0.0535675	0	0.279577	0.280146	0.265211
RGD1310587	0.0350788	0.0348288	0.115821	0.230546	0.234188	0.336029
RGD1559747	0.739271	0.413322	0.495832	0.166915	0.205864	0.0868473
RGD1560687	4.0331	3.53934	4.44095	1.68379	2.03306	1.94155
RGD1561730	0.371715	0.811944	0.377632	2.1799	1.39704	2.69867
RGD1562462	0.329568	0.67961	0.77265	0	0.0250737	0.0255629
RGD1563400	0.306184	0.253335	0.457947	0.834164	0.572012	0.591748
RGD1563917	0.593014	0.56776	0.683141	0.123133	0.209471	0.208219
RGD1565355	2.2016	2.07178	2.89237	0.10728	0.0349796	0.160479
RGD1566189	1.97535	1.54837	2.21804	0.762129	1.02827	0.707624
RT1-DMa	92.493	94.578	90.6712	12.4988	12.5489	10.9065
RT1-T24-1	4.52302	4.43321	4.06483	1.70033	2.33233	1.75414
Rab33a	0.202148	0.0936632	0.246439	0.272525	0.506497	0.570735
Rac3	5.32018	3.786	3.7115	1.01583	1.40016	1.47353
Rapgef4	0.41755	0.367641	0.49623	0.155334	0.0896079	0.11916
Rarres2	3.4199	2.28096	4.05782	8.73714	9.29524	9.84513
Rasa3	34.4829	34.5266	32.3092	15.6788	15.5785	15.2945
Rasd1	1.10581	0.94693	1.21245	0.479557	0.481838	0.532825
Rasgrf1	0.045702	0.122516	0.0557155	0.365058	0.32997	0.313367
Rasgrp1	0.154403	0.0450891	0.032295	0.197445	0.32339	0.361754
Rasgrp4	0.0621782	0.0347259	0.086856	0.192537	0.245988	0.152824
Rasl10b	9.48434	9.46385	8.74952	4.23412	4.65209	3.48089
Rasl11b	9.88331	9.43744	10.0804	24.0336	22.0261	21.3909
Rasl12	4.82217	5.37845	5.09123	18.8104	19.5053	17.3956
Rassf2	12.7498	12.9261	12.8561	4.10603	4.60598	4.55393
Rassf6	0.474738	0.434281	0.390172	0.835979	1.06042	1.24246
Rbp1	0.374225	0.608003	0.380182	1.27274	0.975785	1.50939
Rbpjl	0.177784	0.222281	0.140478	0.77896	0.468898	0.365174
Recql4	1.2089	1.00409	1.0333	0.346721	0.465618	0.539168
Rell2	1.02184	1.51639	0.971136	2.04418	2.45599	2.54823
Reln	0.913783	0.89197	0.861014	2.75156	2.26629	2.66167
Rem2	1.39976	1.46772	1.6214	0.529091	0.569298	0.540832
Ret	0.16414	0.227401	0.213289	0.0347368	0.0339787	0.0461888
Retn	1.21931	1.36683	1.1588	0.357927	0.0778035	0.436268
Rftn2	0.745949	0.959455	0.798011	2.18272	2.13508	1.93171
Rgs18	0.130688	0.530821	0.337955	0.756802	1.01055	0.814627
Rgs2	64.1904	61.5364	71.6738	16.357	15.5898	14.8483
Rgs7	2.64368	2.65745	2.202	0.464881	0.568419	0.471886
Rgs9	0.0420946	0.0365703	0.0106912	0.154289	0.135309	0.143255
Rhoj	67.0936	66.626	64.9673	24.3388	24.8372	21.9584
Rhox5	0.469721	0.233187	0.347054	0	0	0.0215291
Rmi2	0.677138	0.686616	0.966012	0.305913	0.356234	0.239702
Rnase1l2	0	0.0271472	0.0277773	0.497626	0.135213	0.137851
Rnd1	1.64718	1.28499	1.10564	3.00382	2.69098	2.12064
Rnf125	2.26596	2.24981	2.83002	0.54651	0.801874	0.880406
Rnf138l1	1.76374	1.33527	1.63503	0.735628	0.697768	0.266768
Rnf150	7.13867	6.85723	6.66635	2.68876	2.71899	2.6814
Rnf182	0.00275008	0.00546097	0	0.0111226	0.067999	0.0277303
Rnf39	0.0354996	0.140986	0.0721294	0	0	0
Rpp25	0.531517	0.170235	0.38321	1.10952	0.491779	0.812571
Rps6ka5	2.14982	2.25441	2.45091	4.92749	4.77216	4.77089
Rrm2	19.7138	18.4025	20.7626	6.5687	6.08904	6.80602
Rtn1	0.208091	0.118956	0.21781	0.0191276	0.043657	0.031792
Rtn2	1.02907	1.11722	0.801187	1.99349	2.25437	1.48375
Rtn4rl1	1.0612	0.996681	1.26124	0.414282	0.291773	0.470988
Rtn4rl2	0.41932	0.868096	0.262848	0.144334	0.247071	0.152934
Ryr3	0.151509	0.182338	0.195899	0.76132	0.685673	0.783925
S100a10	1096.47	1124.88	1172.03	390.666	370.492	402.638
S100a5	20.778	22.6929	19.5256	3.63278	5.60853	3.88472
S100a6	3129.13	3363.14	3305.79	1334.69	1372.48	1308.07
S1pr1	3.98015	4.29939	4.09967	10.4957	11.7671	11.1049
Samd11	0.405548	0.465932	0.45909	0.0761531	0.189093	0.122679
Sapcd2	0.314139	0.485178	0.540765	0.185284	0.220078	0.215573
Sash3	0.354084	0.0811293	0.0830124	0.458998	0.592655	0.558444
Scara5	222.999	224.731	220.606	90.6338	90.7735	91.0716
Scd	4.57717	5.05275	4.64003	18.338	17.3536	16.9527
Scd3	0.481783	0.457246	0.511046	0	0	0.00714415
Scg3	0.0110439	0.0109652	0.0336593	0.1005	0.251228	0.0556804
Scgb2a1	0.995417	1.89253	1.0543	0	0	0
Scimp	0.223146	0.246172	0.176321	3.30917	3.80096	3.45011
Scin	9.52131	8.84088	8.67341	0.446793	0.445288	0.546452
Scn3a	0.0501035	0.0548926	0.0719636	0.00174691	0.00170878	0
Scn3b	1.28085	1.65075	1.71458	0.198072	0.422274	0.329216
Scn7a	1.00111	0.883158	1.01704	0.153887	0.324472	0.221672
Scn8a	0.0301071	0.0219212	0.0163127	0.0629128	0.039703	0.0809554
Sctr	0.0114277	0	0	0.103992	0.192143	0.0921844
Scube2	0.105806	0.154813	0.090518	0.0168918	0.0550772	0.0112304
Scube3	4.15671	3.42763	4.1754	13.743	14.47	14.4662
Scx	3.59141	4.24995	2.86371	12.0551	11.6681	12.1274
Sdc1	10.6111	10.8325	11.012	34.6067	34.1784	31.1703
Sdr16c5	0.173525	0.297588	0.0320522	0	0	0.0318131
Sectm1b	0.299851	0.277866	0.223391	0.737746	0.682102	0.977606
Selp	0.0356922	0	0.0652687	0.346453	0.29653	0.230336
Selplg	1.00229	1.28233	0.963573	2.18329	2.74772	1.69572
Sema3b	1.04998	1.47755	1.41106	3.55275	3.3362	3.13453
Sema5a	0.965077	0.859693	0.964406	2.99352	3.1579	3.18995
Sema6b	0.662736	0.968594	0.538629	0.278762	0.382798	0.272652
Serinc2	7.6879	8.95722	8.14236	21.0991	19.6687	19.7229
Serp2	0.396671	0.575618	0.27899	1.54261	0.935547	1.47685
Serpina12	0.284501	0.0898778	0.17079	0	0.0255804	0
Serpina3n	17.4543	18.0077	16.5878	0.0805332	0.168805	0.32125
Serpinb1a	5.10597	6.03521	5.09225	18.5706	20.2186	20.2737
Serpinb2	0.270299	0.261663	0.439364	0.0546606	0.00668346	0.0136277
Serpinb6b	0.706365	0.960611	0.82199	1.78337	1.77832	1.70079
Serpinb7	3.06424	2.30485	2.83002	1.05624	0.906906	0.819266
Serpinb9	26.3286	26.8956	26.9853	51.3606	50.8468	50.9939
Sertad4	6.61284	6.92576	6.32802	13.653	13.1089	13.3432
Setbp1	2.62151	2.54213	2.81372	5.26562	4.92979	5.5262
Sfrp2	0.443143	0.285396	0.24335	5.83699	5.449	4.70994
Sfrp4	10.2762	10.0217	10.2614	22.8405	21.9113	22.5442
Sft2d2	2.07278	2.00238	2.43302	5.47083	5.48533	5.90775
Sfxn4	1.80532	0.933963	1.49621	0.403506	0.422892	0.776058
Sfxn5	0.24648	0.272806	0.299663	0.796683	0.895191	0.70079
Sgcg	56.8182	61.2438	56.0859	140.214	144.497	146.392
Sgk1	103.577	104.342	109.198	13.7702	13.2036	12.9377
Sgo2	2.19952	1.48087	1.8631	0.710026	0.780628	0.778303
Sh2d3c	0.0238371	0.0197227	0.0161444	0.104442	0.102163	0.12018
Sh3gl2	0.603908	0.562128	0.843592	0.0254425	0.0497744	0.101491
Sh3tc1	0.0778889	0.0864318	0.153603	0.28259	0.380647	0.383454
Sh3tc2	0.37683	0.378546	0.427867	1.05788	0.837483	1.00134
Shc3	0.0120316	0.0119459	0	0.18248	0.0475993	0.06066
Shc4	0.402215	0.289383	0.183582	1.19058	1.48746	1.36954
She	0.0721897	0.0119459	0.0325951	0.0689368	0.130898	0.2022
Shisa7	0.00517613	0.0359747	0.0262927	0.060187	0.0767915	0.0808994
Shroom3	0.122421	0.182322	0.116597	0.0489967	0.0454049	0.0257171
Shtn1	0.223571	0.127805	0.15142	0.39046	0.388639	0.334739
Siah3	0.905086	1.18852	1.24577	0.265687	0.269514	0.510292
Siglec10	0.91984	0.989391	0.965633	2.03064	2.03939	1.91686
Siglec15	0	0	0	0.112445	0.0733271	0.0373789
Siglec8	0.00741334	0.044163	0.00753136	0.164906	0.2053	0.149504
Sim2	0.0900068	0.0191497	0.065314	0	0	0
Sipa1l1	17.8672	18.2014	17.2668	8.2413	7.63702	8.18782
Six3	1.09679	0.983586	0.880615	2.15535	2.37075	1.99782
Ska1	2.12557	2.9639	2.46109	0.995581	0.695609	1.30805
Skida1	0.208842	0.194786	0.147873	0.0767864	0.0719809	0.108483
Slamf6	0.0144821	0.0718944	0.0735632	0.263575	0.472674	0.292058
Slamf9	0.0790592	0.117744	0.180715	0.499611	0.840576	0.597891
Slc10a6	2.03145	2.17645	2.16938	0.812057	1.00927	0.905107
Slc11a1	16.8107	15.2581	15.5053	2.31107	2.41689	2.28349
Slc13a4	4.21376	4.06218	3.24008	0.214984	0.299506	0.214395
Slc15a1	0.015125	0.112629	0.0691461	0.24469	0.516097	0.434659
Slc15a3	0.568084	0.948059	0.589407	1.83318	2.21158	1.93785
Slc16a14	12.3328	12.2118	11.4244	3.22279	3.48213	3.73072
Slc16a3	13.2531	13.368	12.6789	38.2653	38.3162	36.2387
Slc16a6	0.278742	0.261995	0.241647	0.0901888	0.0624895	0.0149903
Slc1a2	0.406992	0.319562	0.451443	0.0398918	0.0575048	0.0858464
Slc22a13l1	0.0190707	0.0189348	0.0251866	0.00192827	0.00188618	0.00192298
Slc25a2	0.266047	0.145978	0.128029	0.467218	0.415473	0.472997
Slc25a21	0.372727	0.350066	0.342841	0.0967636	0.0547984	0.192997
Slc25a33	2.01334	3.53667	3.0069	7.89926	8.85014	8.2767
Slc25a43	0.534332	0.322475	0.425755	0.879262	0.942971	0.697257
Slc25a52	0.0125814	0.0124917	0.0127817	0.0890486	0.111992	0.164923
Slc26a2	3.42649	2.63326	3.03516	6.19692	5.99036	6.80268
Slc28a2	2.37451	1.73239	1.96558	0.280994	0.368801	0.276677
Slc29a2	7.77703	7.46974	7.44645	2.22742	2.24483	2.19439
Slc2a1	17.5401	20.0648	18.1278	35.8423	35.9975	34.5192
Slc37a2	0.566382	0.430366	0.598884	1.40247	1.48618	1.23546
Slc38a1	1.97371	2.42696	2.10395	5.07318	5.34109	5.31241
Slc40a1	8.49987	9.13115	9.20993	2.88106	3.2276	3.00534
Slc44a3	0.231635	0.442932	0.244038	0.0607208	0.0593956	0.198965
Slc47a1	0.112219	0.179509	0.0950046	0.479079	0.462457	0.590922
Slc4a5	0.0368628	0.0162667	0.0374497	0.144949	0.16204	0.194112
Slc4a8	0.0840763	0.0737704	0.0456869	0.18386	0.22626	0.266163
Slc5a3	0.290293	0.403513	0.61932	1.92744	1.65568	2.16609
Slc6a12	0.0663521	0.0847018	0	0.421705	0.496877	0.936679
Slc6a17	0.311507	0.162007	0.124326	0.50245	0.374115	0.426286
Slc6a4	0.049536	0.0772875	0.122217	0.186036	0.29396	0.285425
Slc6a6	3.56524	3.31192	3.44784	11.5755	11.1217	11.7548
Slc6a9	2.34471	2.25378	2.43037	11.5378	12.1195	11.5473
Slc7a1	4.83916	4.45249	4.42347	9.66877	9.93028	10.2481
Slc7a11	0.249435	0.313566	0.410763	1.33019	1.45634	1.53141
Slc7a3	0.0334556	0.0332172	0.0934676	1.44612	1.77027	1.84698
Slc7a5	14.9341	14.6849	13.551	42.0047	39.9976	38.0438
Slc7a7	3.58177	4.10206	3.58121	8.67	8.90678	8.3148
Slc9a7	0.0427448	0.054229	0.0747879	0.206495	0.10804	0.167616
Slc9b2	0.0479559	0.0833247	0.0487193	0.424277	0.213438	0.108801
Slco4a1	0.143202	0.0989091	0.0695784	0.358837	0.406427	0.288794
Smad9	1.74454	1.62462	1.77231	0.547279	0.448858	0.533185
Smarca1	0.593322	0.689859	0.717769	1.38533	1.33579	1.85386
Smarcd2	56.3413	57.0517	55.4296	17.8821	20.3685	18.1533
Smco3	0.240705	0.168178	0.199252	0.0630985	0	0.071915
Smox	0.569116	0.394055	0.304303	0.726872	0.962824	1.00426
Smpd3	1.25721	1.24393	1.12254	0.307899	0.111867	0.219325
Snap25	0.290658	0.412266	0.316377	0.125952	0.0102669	0.146541
Snrpf	79.3457	80.3586	80.5522	35.7851	39.2245	37.1213
Sntb1	2.87697	2.57458	2.53819	7.77951	8.3398	8.82697
Sntg1	0.132421	0.100173	0.112108	0.0350672	0.0374203	0.0604047
Snx20	0.674544	1.30513	0.667711	2.18603	2.12121	1.95331
Sod2	36.0964	38.6511	35.0984	76.2182	73.1258	71.0029
Sorbs2	0.830074	0.838127	0.879021	0.368438	0.353439	0.295078
Sorcs2	0.254278	0.120744	0.176897	0.433163	0.541255	0.356729
Sox11	0.163944	0.0465073	0.0594836	0.213128	0.277968	0.35424
Sox4	10.6243	9.52965	10.4561	28.7174	29.2847	29.3438
Sox5	0.497453	0.347364	0.427623	0.185163	0.132463	0.126779
Sox6	0.0140076	0.0224664	0.0262718	0.0533846	0.0586137	0.0445464
Sox8	0.342951	0.441934	0.400302	0.671391	0.757775	0.831421
Sp100	14.8363	13.9573	14.64	5.91121	6.30615	7.5516
Spaar	2.6885	2.83014	2.59967	0.867915	0.88101	1.38813
Spacdr	0.247116	0.423795	0.547746	0.863161	1.11095	1.24589
Spata13	1.99909	1.65904	1.98705	0.921157	0.757995	0.772784
Spata18	1.94102	2.06953	1.97192	20.15	19.9284	19.1384
Spata19	2.1396	2.23057	2.42725	0.180281	0	0.215745
Spc24	22.4377	22.926	23.5024	8.62593	7.87803	8.03174
Spdl1	3.80931	4.15756	3.91797	1.08955	1.81367	1.73469
Spi1	0.555182	0.426205	0.261659	0.891218	0.883089	1.28699
Spink8	0.0767188	0.0276989	0.0566837	0.352597	0.151757	0.0914241
Spn	0.381815	0.265931	0.21421	0.58773	0.693265	0.930896
Spns2	0.159962	0.10459	0.118908	0.0236692	0.0308701	0.0629448
Spock2	0.456733	0.386296	0.425337	0.132556	0.0627402	0.174836
Spon1	0.0293774	0.0350017	0.011938	0.172283	0.0871669	0.130339
Spon2	4.05189	4.18512	3.75079	24.7668	24.4306	22.7031
Spp1	1161.74	1169.27	1165.56	202.343	202.279	209.576
Sprn	0.286046	0.252451	0.266383	0.0562381	0.0314347	0.192288
Sprr1a	4.51986	3.64802	3.28833	1.23835	0.92291	1.14674
Spry1	2.91716	3.50761	3.43508	13.5029	12.3464	10.6199
Spsb1	28.4655	29.2712	27.5959	9.88524	9.44747	9.06023
Sptbn2	0.279559	0.306205	0.198356	0.0695448	0.0746103	0.0984383
Sqor	59.6321	62.3512	58.9398	27.578	27.5948	27.1608
Srebf1	7.26096	6.79574	7.05112	14.2461	14.5265	13.3187
Srgap3	2.19457	2.16569	1.7827	0.826493	0.834818	0.949655
Srsf12	0.563012	0.724337	0.870046	1.49132	1.36466	1.31932
Ssh2	4.72512	4.47752	5.11086	1.86951	1.93526	2.64248
St6galnac1	0.0292083	0.00966672	0.108802	0.374084	0.337031	0.206164
St6galnac3	0.0833212	0.0910001	0.0948053	0.14996	0.192836	0.189877
St8sia6	0.00568778	0.0112945	0.0202241	0.0747628	0.0815694	0.0172057
Stac	0.840169	1.21919	0.845337	3.09579	3.67542	3.91005
Stac2	1.36945	1.79099	1.18929	4.12423	3.48807	3.519
Stap1	0.0596429	0.0473742	0.0605923	0.162825	0.294948	0.324759
Stbd1	6.55008	6.67357	6.26877	13.2457	14.4824	13.6786
Stc1	7.77521	6.86875	7.49755	2.84592	3.54139	3.33464
Steap1	164.524	169.542	163.314	48.7606	45.6667	45.6027
Steap2	88.7962	85.3321	89.5999	33.6767	33.0501	31.8091
Sting1	0.243746	0.230485	0.283002	1.03276	1.68753	1.35764
Sulf2	134.252	137.174	126.529	46.3255	46.5707	45.1686
Sult1a1	56.9636	55.9409	55.7607	2.21752	0.883006	1.36992
Sv2b	13.8104	13.3634	14.7944	0.0312041	0.0305231	0.0544576
Sybu	0.177148	0.0999772	0.242484	0.033938	0.0571731	0.0507675
Syn2	0.0569579	0.0323154	0.0289323	0	0	0
Syne3	11.832	11.2683	11.721	5.48324	4.9569	5.75906
Synm	4.77769	4.6709	4.75667	0.589355	0.661549	0.619858
Synpo2	4.89535	5.44647	4.9674	1.31642	1.22474	1.36533
Syt10	0.0101175	0	0.0171309	0.0579694	0.0300199	0.0748137
Tagap	0.152713	0.0530688	0.108601	0.0231616	0.00755203	0
Tagln	1225.07	1314.38	1203.51	4023.54	4158.73	3940.16
Tbc1d4	0.80147	0.633147	0.764667	0.345291	0.375666	0.295153
Tbc1d9	0.892644	0.971628	1.0412	2.34332	2.21371	2.14689
Tbkbp1	0.202715	0.106226	0.165898	0.0341613	0.038985	0.0624574
Tbxas1	0.295428	0.41814	0.504475	0.673688	0.94496	0.722548
Tcp11l2	11.6182	10.0795	11.8127	5.36994	4.7786	4.7107
Tead2	0.557892	0.57522	0.523175	2.38654	2.32385	2.261
Tec	0.748563	0.659777	0.909907	1.44737	1.60802	1.65793
Tenm3	0.205325	0.219424	0.144901	0.394612	0.38755	0.387209
Tenm4	0.308348	0.289886	0.315214	0.652778	0.644249	0.750095
Tent5b	18.0971	19.9021	18.4133	2.8914	3.97601	2.71632
Tent5c	0.288857	0.42223	0.383122	0.649037	0.702327	0.88189
Terf1	3.85114	3.19418	4.34186	1.37712	1.69545	2.14685
Tf	86.097	92.5608	87.6355	6.24648	6.27363	5.94811
Tfap2c	0.199893	0.306724	0.479996	1.24943	1.48277	1.5117
Tfpi2	0.770378	1.48648	1.04844	2.48379	2.44396	2.57958
Tgfa	26.689	26.5567	26.3277	8.24843	7.66997	8.70688
Tgfb3	55.6455	59.2002	56.7478	128.957	130.16	128.603
Tgfbr3	27.071	24.2087	25.2694	9.27116	9.14249	9.256
Tgm5	0.205674	0.051052	0.11318	0.00866499	0.00847587	0.00864125
Thnsl1	0.142475	0.0816112	0.261651	0.332442	0.352285	0.326006
Tie1	0.194933	0.133061	0.235168	0.714484	0.879638	0.706384
Timp3	0.23631	0.156417	0.229402	8.19284	7.73357	7.80503
Timp4	2.64469	2.40702	2.28097	0.988852	0.73567	0.597241
Tle6	0.00693359	0.0688417	0.0281759	0.175266	0.075434	0.209743
Tll1	5.55111	5.21379	5.91679	11.4694	10.9177	12.4168
Tlr2	1.16738	1.48735	1.48074	7.30727	6.56048	7.74312
Tlr5	4.78751	4.65938	4.57935	1.91464	1.881	2.4075
Tlr7	1.44211	1.76874	1.99831	0.375256	0.340847	0.652226
Tm7sf2	3.37584	3.69636	3.22124	11.0376	11.2024	12.3276
Tmbim1	24.1184	24.6855	22.9536	10.3081	9.96991	9.34175
Tmc1	0.0227894	0.022627	0.0173642	0.0691281	0.0901592	0.218306
Tmcc2	1.17578	1.31266	0.770646	2.09829	2.25078	2.13625
Tmeff2	1.16124	0.766012	1.03428	0.0804211	0.0235998	0.00802008
Tmem100	2.57995	2.1631	3.12581	0.154585	0.340225	0.395039
Tmem139	0.37968	0.394109	0.12273	0.348999	0.955871	0.870108
Tmem140	9.85442	10.3496	8.90672	4.22289	3.9259	4.40275
Tmem151a	2.23449	2.71158	2.69978	1.31096	1.46425	0.741771
Tmem176b	0.513537	0.220487	0.253806	1.02445	1.0021	0.797725
Tmem196	0.0954767	0.132715	0.116396	0.395805	0.42966	0.505435
Tmem26	0.161019	0.218771	0.29703	0.801187	0.838183	0.833174
Tmem35a	22.2782	24.549	23.6347	4.86213	5.10519	5.18024
Tmem63c	0.0823693	0.0554951	0.065749	0.0267701	0.0174572	0.00889891
Tmem81	0.217497	0.316723	0.309344	0.850336	0.616663	0.599453
Tmem86a	0.50612	0.434606	0.277934	1.39692	1.75878	1.3931
Tmem88	1.10307	1.75533	1.24344	0.443076	0.747251	0.670411
Tmie	0.0727441	0.0877026	0.0897384	0.0105075	0.0102782	0
Tmtc2	0.400049	0.448782	0.593792	1.35007	1.2204	1.59783
Tnc	59.3059	58.1608	56.3298	167.998	163.849	163.359
Tnfaip6	7.91568	6.08239	7.06271	33.0934	38.0897	36.3862
Tnfaip8	9.21232	10.0065	8.19434	3.67751	3.56462	3.25994
Tnfaip8l1	0.296673	0.892881	0.54628	0.29997	0.256745	0.149574
Tnfrsf11a	0	0	0.0346117	0.094732	0.0673924	0.085884
Tnfrsf19	0.190395	0.464002	0.369268	1.06756	0.89019	0.523591
Tnfrsf1b	6.42038	6.65813	6.58605	3.13985	2.66093	2.9243
Tnfrsf22	50.9363	52.4136	53.7226	21.8283	25.2161	22.4648
Tnfrsf25	0.346217	0.366168	0.542885	0.281574	0.0967721	0.0531247
Tnfrsf9	0.229955	0.0499442	0.219015	0.348766	0.49041	0.492732
Tnip3	0.154522	0.126346	0.304729	1.69106	1.54627	1.77808
Tnmd	0.0709992	0	0	0.323047	0.298441	0.519038
Tnnc1	1.28155	1.3734	0.723308	7.73363	7.14234	5.27154
Tnnt2	1.13709	0.431671	0.849405	2.23182	1.90195	1.65242
Tns1	31.7409	31.2975	30.89	14.7629	14.5218	14.523
Tox3	0.00690327	0.0274163	0	0.21638	0.238968	0.396769
Tp53i11	1.03671	1.13147	0.868301	1.92843	2.13681	2.06679
Tpm1	87.8775	88.1012	91.7433	288.077	288.8	309.571
Tpm2	565.055	570.715	573.631	1092.51	1094.81	1083.79
Tppp3	2.95689	2.38535	1.66626	0.72408	0.799668	0.395988
Trabd2b	0.6285	0.680113	0.691117	1.60656	1.68558	1.90123
Traf4	4.74192	3.94111	3.54766	8.01432	7.87668	7.37172
Trem1	0.836405	1.16658	1.90175	2.89954	2.65899	2.71087
Trem2	3.5718	1.89271	2.7113	6.49257	6.68826	5.07866
Trhde	0.0949954	0.0725526	0.131151	0.386667	0.26741	0.353679
Trib2	6.82517	6.21523	7.13841	2.64461	2.5173	2.47345
Trib3	3.16041	3.82789	4.11846	45.6074	44.9229	45.8161
Tril	3.99197	3.84224	2.98828	1.95147	1.5851	1.56183
Trim15	0.013953	0.0184714	0.0472504	0.103459	0.096601	0.0891062
Trim30c	0.00893518	0.124201	0.0635419	0	0	0.00900972
Trim63	0.272021	0.331465	0.376843	0.750121	0.538083	1.00989
Trim66	0.00643896	0.0255723	0.0109024	0.0542543	0.0615615	0.0930618
Trmt9b	0.00948419	0.00188332	0.0057811	0.0326046	0.0431494	0.0401659
Trpm2	0.0034227	0.0135932	0.0695437	0.107283	0.0947857	0.0759276
Trpm3	0.373128	0.390861	0.413845	0.124604	0.0744853	0.169136
Tsc22d3	81.8689	80.7927	84.1973	19.2501	19.8524	18.33
Tshz2	13.9271	13.5671	14.4338	5.92442	5.43582	5.60353
Tspan11	0	0.00445002	0	0.0725084	0.0443287	0.0497129
Tspan13	0.593191	0.588963	0.527305	1.69939	1.67452	1.88165
Tspan2	1.57525	1.18375	1.42461	3.12306	3.37872	3.50693
Tspan8	0.619849	0.228589	0.0359838	0.644644	0.595543	1.3929
Tspoap1	0.0431094	0.0396316	0.0551501	0.0952488	0.101066	0.088548
Ttc22	1.12387	1.14643	0.688184	0.155666	0.121815	0.163001
Ttk	1.92786	1.77011	2.73829	0.812711	0.812905	1.26143
Ttyh3	7.97883	7.81664	7.01882	18.4666	19.6054	17.4301
Tut1	17.6214	18.264	18.7302	7.17568	9.15853	7.05535
Txn1	1801.48	1918.73	1955.47	769.025	804.118	791.807
Tyrp1	0.0529122	0.061291	0.00895909	0.160501	0.218053	0.177846
Uap1	135.03	133.434	139.532	58.3449	57.1916	59.5517
Uap1l1	9.90164	10.1871	10.1304	19.7315	20.6678	18.672
Uap1l2	10.139	9.87029	10.7652	4.58824	3.97448	4.58814
Uchl1	33.1127	33.6535	27.4215	63.0526	63.2468	62.8566
Uck2	28.7257	29.7343	30.044	14.1035	13.1659	13.6588
Ucn2	0.211649	0.394013	0.215018	0	0.0261663	0.0533537
Ugt1a6	11.9599	13.2558	13.6617	1.78754	1.68165	1.7729
Ugt1a7c	3.6605	3.47865	3.28315	1.09978	1.0344	1.20222
Unc13c	0.0708856	0.0461113	0.0471816	0.00494299	0.00483511	0.00246472
Upk1b	6.33127	6.29826	6.22138	17.145	17.1811	17.2949
Upp1	21.2786	21.9957	18.533	9.02158	8.39197	7.52635
Usp11	6.75724	6.91658	6.63835	12.7631	13.6076	12.1591
Vangl2	0.0424493	0.0252881	0.0431251	0.108733	0.111958	0.136971
Vax2	0.848285	0.604215	0.524567	1.56626	1.7327	1.46899
Vegfa	22.406	21.9889	25.7642	43.9687	47.3386	49.6363
Vegfd	43.6778	42.4335	42.17	9.78607	9.07996	9.4677
Vgf	4.07286	3.90954	3.67965	1.30686	1.02564	1.28055
Vill	0.132084	0.113657	0.00894576	0.0178069	0	0
Vip	1.11601	1.37506	1.39331	4.13298	4.20236	4.39282
Vit	0.0272477	0.099196	0.0461357	0	0.00449153	0
Vldlr	8.00271	7.38258	6.99439	14.6311	15.3609	15.6771
Vnn1	1.03254	1.13466	0.947134	2.20966	1.92348	2.29458
Vnn3	0.054029	0.013411	0.0274446	0.20486	0.200389	0.299639
Vsig10l	0.690309	0.928005	1.07988	1.87158	2.00595	2.05741
Vsig4	3.0017	4.17909	2.99838	0.305201	0.265369	0.388911
Wdfy4	0.225818	0.176275	0.167709	0.492873	0.338868	0.35019
Wdhd1	4.05693	3.33801	4.04816	1.89359	1.72283	1.73824
Wfdc18	28.7906	31.7378	30.3423	9.35889	8.67562	7.75962
Wfdc21	1.60857	1.85265	1.17661	0	0.381829	0.259519
Wfikkn2	0.783831	0.635566	0.676862	0.330226	0.251954	0.25687
Whrn	0.587194	0.640785	0.655659	1.01628	1.44929	1.27487
Wnt11	0.0519585	0.110546	0.158357	0.0375256	0	0.0149691
Wt1	0.231496	0.154374	0.238691	0.00349356	0.00341731	0.00348399
Xdh	75.06	75.1519	71.8161	18.1498	17.1236	16.6732
Xkrx	6.91742	6.07063	6.21987	2.66015	3.16953	2.66113
Xlr4a	0.0103715	0.0720833	0.168586	0	0	0.0104581
Zbtb16	5.74508	4.85357	5.11229	0	0.00296254	0.00302034
Zbtb18	2.1429	2.07697	2.35843	4.11418	4.46173	4.49734
Zfp36	37.2759	39.5675	34.708	14.8857	17.6385	14.5812
Zfp469	3.23018	3.42846	3.11269	7.55741	7.76472	7.66935
Zfp474	0.278425	0.300479	0.516522	0.0734397	0.179592	0.146477
Zfp566	0.383828	0.424896	0.452687	0.8431	0.706885	0.84079
Zfp711	0.031487	0.0104209	0.0266569	0.0583677	0.0934262	0.174623
Zfp94l1	0.27732	0.43731	0.248589	0.676263	0.637302	0.616839
Zglp1	0.0365123	0.018126	0.0185468	0.0738361	0.108337	0.349761
Zhx3	2.03448	2.03808	1.79337	0.908773	0.894674	0.904613
Zim1	0.0526475	0.0392042	0.0588342	0.167683	0.153609	0.167223
Zpbp2	0.534624	0.544782	0.700358	0.18493	0.166979	0.326288
Zyg11a	0.606837	0.235267	0.563655	0.00584363	0.0057161	0
hist1h2ail2	0.0513627	0	0.0521804	0.675136	0.508001	0.258956
