# Supplementary material for: Peptide-based Self-adaptive Implant Coating Sequentially Regulates Bone Regeneration to Enhance Interfacial Osseointegration
Source: Research Square preprint supplement (doi:10.21203/rs.3.rs-5132912/v1), 2024-10-01
Supplement: Supplementary file 33 [file 0-DEG-fpkm_group.xlsx]

## Sheet: Sheet1
Sample	Group
C1	C
C2	C
C3	C
S1	S
S2	S
S3	S
