# Supplementary material for: Peptide-based Self-adaptive Implant Coating Sequentially Regulates Bone Regeneration to Enhance Interfacial Osseointegration
Source: Research Square preprint supplement (doi:10.21203/rs.3.rs-5132912/v1), 2024-10-01
Supplement: Supplementary file 37 [file 0-volcano.xls]

Names	log2FoldChange	p-value
2510039O18Rikl	-0.251800802	0.001381022
6430548M08Rikl	0.201492512	0.019266732
A1bg	-0.086164325	0.958385296
A1cf	2.923717517	0.091593151
A2m	-1.633453867	4.76E-235
A3galt2	0.132261856	0.02053299
ATP6	-0.172131162	8.88E-05
ATP8	-0.137180847	0.34025262
Aaas	0.213333583	0.027194303
Aacs	-0.558246566	1.46E-12
Aadat	-0.434056206	0.716545893
Aagab	-0.164753099	0.022424456
Aak1	0.257539446	2.99E-08
Aamdc	0.846947783	1.36E-05
Aamp	-0.003634959	0.9466334
Aanat	-0.270421841	0.876709915
Aar2	0.1498866	0.042546031
Aard	-0.701870075	0.032519504
Aars1	-0.868687486	8.23E-72
Aars2	-0.136880569	0.312372908
Aarsd1	0.209743732	0.035675586
Aasdh	-0.225075878	0.111031696
Aasdhppt	0.059270225	0.545039942
Aass	0.626216328	3.53E-12
Aatf	0.125537359	0.166002299
Aatk	0.728786243	0.69386569
Abat	0.696004502	0.135853626
Abca1	0.526856544	6.05E-19
Abca12	-0.801818348	0.66317191
Abca13	-1.295784111	0.490309032
Abca16	-0.708763476	0.517846832
Abca17	-0.271197683	0.727604961
Abca2	-0.303973106	0.001564301
Abca3	-0.379474927	1.09E-07
Abca4	0.617030674	0.183255576
Abca5	-0.297911619	0.009853252
Abca6	2.815700182	0.191077496
Abca7	-0.359154842	0.000118205
Abca8	1.116521049	3.96E-05
Abca8a	2.173114017	0.122973223
Abca9	0.407041664	1.41E-05
Abcb10	0.313925385	0.029495536
Abcb1a	-0.965661639	3.63E-18
Abcb1b	0.711310316	1.70E-51
Abcb4	-0.741097981	0.022788674
Abcb6	0.503565458	4.06E-06
Abcb7	0.107519455	0.458422318
Abcb8	-0.105336224	0.201276024
Abcb9	0.570662669	0.156243041
Abcc1	-0.438579404	1.17E-21
Abcc10	0.219302354	0.113061182
Abcc2	0.570680001	0.197631504
Abcc3	0.400456939	6.91E-05
Abcc4	-0.230560893	0.000912271
Abcc5	-0.353124394	0.000262869
Abcc9	1.48013828	1.07E-72
Abcd1	0.310773823	0.000488053
Abcd2	0.70259939	0.001993935
Abcd3	0.104965671	0.145488185
Abcd4	-0.381569926	0.000156785
Abce1	0.085559419	0.112930386
Abcf1	-0.047118579	0.40736455
Abcf2	-0.205844027	0.002276454
Abcf3	0.132528388	0.028604722
Abcg1	-0.184490324	0.251118454
Abcg2	-0.793039326	0.018886342
Abcg3	-0.000460695	0.999077771
Abcg3l1	0.534220339	5.47E-05
Abcg3l2	0.25332182	0.006080696
Abcg3l3	-0.230414533	0.010177404
Abcg3l4	0.232230997	0.031226501
Abcg4	0.032762942	0.91435732
Abhd1	0.794998913	5.43E-07
Abhd10	-0.468831372	0.005479016
Abhd11	-0.289177495	0.128020745
Abhd12	0.015971303	0.771147871
Abhd12b	0.222261866	0.880527683
Abhd13	-0.112769273	0.315731526
Abhd14a	0.345549213	0.039461712
Abhd14b	-0.379948257	7.19E-05
Abhd15	2.019471532	4.41E-28
Abhd16a	0.254624618	0.000380249
Abhd17a	0.105977708	0.102109404
Abhd17b	-0.097187682	0.497672456
Abhd17c	0.034827162	0.684102804
Abhd18	-0.402130624	0.041873205
Abhd2	0.271886268	6.84E-06
Abhd3	0.133549948	0.591674073
Abhd4	0.310501747	2.09E-07
Abhd5	0.13994285	0.024014392
Abhd6	0.243868606	0.002073987
Abhd8	-0.322285695	0.000779398
Abi1	0.216642709	0.001127627
Abi2	0.112107943	0.063700418
Abi3	-1.403165398	0.046500338
Abi3bp	-0.191481123	0.011667047
Abitram	0.085261904	0.285907386
Abl1	0.09376749	0.097848634
Abl2	0.01974931	0.820815706
Ablim1	2.148695964	1.11E-69
Ablim2	0.262875494	0.725119808
Ablim3	-2.194109178	0.000209474
Abo	1.218683049	2.47E-05
Abr	0.390513539	2.16E-11
Abracl	-0.471966814	1.51E-13
Abraxas1	-0.052041192	0.76467296
Abraxas2	-0.112768985	0.15425765
Abt1	-0.005985138	0.95939268
Abtb1	0.62629957	6.37E-06
Abtb2	0.763207844	8.48E-09
Abtb3	-0.074100075	0.852759377
Acaa1a	0.399414296	0.000242022
Acaa1b	-0.983455432	0.241349441
Acaa2	0.146186348	0.092696115
Acaca	-0.458467674	6.94E-16
Acacb	-1.708135666	0.071073767
Acad10	-0.045895609	0.722938759
Acad11	1.031224638	4.25E-54
Acad8	-0.247127081	0.024248914
Acad9	0.21792059	0.004547943
Acadl	0.084460885	0.163433315
Acadm	-0.044140338	0.54788615
Acads	-0.448024554	2.75E-06
Acadsb	-0.018669212	0.849952549
Acadvl	0.43568511	2.91E-12
Acan	2.485446677	0.208737102
Acap1	1.221329856	0.218381728
Acap2	-0.065921162	0.264795488
Acap3	0.157181417	0.080851843
Acat1	0.153005552	0.009820358
Acat2	-0.774129451	7.03E-29
Acat2l1	-0.840022271	0.511293724
Acbd3	-0.106503712	0.053100788
Acbd4	-0.02431229	0.858697212
Acbd5	0.178533206	0.062204553
Acbd6	0.131341837	0.200241416
Accs	-0.570491648	2.54E-07
Accsl	-1.945329393	0.022023154
Acd	-0.111491693	0.342328962
Ace	2.861014499	3.67E-29
Ace2	1.127050509	0.440397415
Acer1	1.898988036	0.433614616
Acer2	3.769300963	3.02E-155
Acer3	0.063885964	0.44154701
Ache	-0.028475511	0.940167797
Acin1	-0.001661804	0.977662961
Ackr3	0.091146635	0.160033268
Ackr4	0.846060491	4.01E-54
Acly	-0.339759125	2.95E-14
Aco1	0.071794935	0.176666357
Aco2	0.174008424	0.003465114
Acot1	2.278269977	0.026133156
Acot11	0.042638992	0.811447301
Acot13	0.09556611	0.607488261
Acot2	-0.055625683	0.736760644
Acot3	0.903110045	1.83E-11
Acot4	1.865904345	0.02611543
Acot5	0.406971471	0.607457792
Acot7	-0.054710071	0.504523627
Acot8	-0.393663055	0.00240052
Acot9	-0.089531578	0.178567725
Acox1	0.233335433	4.59E-05
Acox2	1.12378073	0.217010903
Acox3	0.400901087	2.53E-08
Acoxl	0.692700218	0.509409996
Acp1	0.373946885	4.86E-06
Acp2	0.101076047	0.076866302
Acp3	-1.14348428	0.009362569
Acp4	0.923880996	0.50801695
Acp5	-0.360549703	0.019934235
Acp6	0.720379357	1.74E-14
Acrbp	-0.260595484	0.579009488
Acsbg1	0.315890667	0.859023979
Acsf2	0.254678625	0.045604196
Acsf3	0.211559491	0.107365435
Acsl1	0.168586	0.050247446
Acsl3	-0.881354758	1.81E-29
Acsl4	-0.460487618	2.33E-09
Acsl5	0.393634882	3.96E-14
Acsl6	-0.743364489	0.498205154
Acss1	0.009001211	0.98642405
Acss2	-0.493173352	2.83E-07
Acss3	1.809353985	1.61E-97
Acta1	-1.250064836	7.64E-33
Acta2	-2.446435234	0
Actb	-0.194608965	0.000498451
Actg1	-0.31063161	5.85E-12
Actg2	-2.484953147	0
Actl10	-0.246277057	0.501163514
Actl6a	-0.23739781	0.008422461
Actl7b	1.62883856	0.14928826
Actmap	-0.104366479	0.287671098
Actn1	-0.699583275	3.06E-54
Actn2	-1.668249844	0.019735873
Actn3	0.089261346	0.904575563
Actn4	-0.427874157	1.95E-22
Actr10	0.016200656	0.766665887
Actr1a	-0.037051706	0.476580045
Actr1b	-0.195652185	0.00139752
Actr2	-0.127600216	0.004101772
Actr3	-0.177333361	3.22E-05
Actr3b	0.995393439	4.19E-06
Actr5	0.142656657	0.501766147
Actr6	-0.106950875	0.327734977
Actr8	-0.125245773	0.092020585
Acvr1	-0.567088522	3.57E-17
Acvr1b	0.337387419	0.000296706
Acvr2a	0.074235286	0.473460666
Acvr2b	0.166615625	0.670991477
Acvrl1	0.140888575	0.074860473
Acy1	-0.307440493	0.001246159
Acy3	0.025858202	0.904241154
Acyp1	0.59298326	4.16E-05
Acyp2	-0.38805292	0.046922073
Ada	0.088029879	0.499879493
Adal	-0.261382573	0.254175123
Adam10	0.331465474	6.57E-09
Adam11	-0.899021303	0.503419599
Adam12	-0.423323203	5.23E-29
Adam15	0.385303035	1.22E-09
Adam17	0.503304272	2.17E-20
Adam19	-1.104776953	1.82E-131
Adam1a	-0.558738987	0.236455399
Adam22	0.820749719	2.27E-11
Adam23	0.224555242	1.84E-05
Adam33	-0.250125817	0.211810596
Adam4	-0.743881246	0.447587549
Adam4l1	-0.383231014	0.62498139
Adam8	1.459667159	2.50E-19
Adam9	0.42550821	4.46E-15
Adamts1	-0.146995121	0.000129919
Adamts10	-0.382585728	2.33E-13
Adamts12	-0.128478088	0.171636931
Adamts13	-0.459134405	0.592205525
Adamts14	-2.215589404	2.80E-54
Adamts15	1.453935647	1.90E-142
Adamts17	0.915679609	0.064290514
Adamts2	-0.202424263	0.010742976
Adamts20	1.506291673	0.069642399
Adamts3	-1.155688278	0.003156781
Adamts4	-0.751319223	2.20E-08
Adamts5	0.375119835	5.33E-13
Adamts6	-0.025621633	0.744588109
Adamts7	-0.82556834	2.22E-21
Adamts8	0.509755022	1.20E-09
Adamts9	1.417233491	5.71E-69
Adamtsl1	0.502733658	7.83E-14
Adamtsl3	-0.333347691	6.40E-13
Adamtsl4	0.664322726	3.31E-41
Adamtsl5	-0.170199019	0.197256481
Adap1	-1.442139982	0.007771071
Adap2	0.015160602	0.971855885
Adar	0.047160274	0.502190363
Adarb1	-0.084890055	0.333149289
Adat1	0.304296968	0.140589207
Adat2	0.330561662	0.018233185
Adat3	0.061660255	0.818009017
Adck1	0.231249225	0.146570895
Adck2	-0.052077348	0.615097391
Adck5	0.018869705	0.872914857
Adcy1	0.479981111	0.705008293
Adcy10	-0.048137742	0.894015432
Adcy2	0.427790087	5.03E-05
Adcy3	0.498994193	2.16E-16
Adcy4	-0.647959483	2.94E-08
Adcy5	0.552873478	0.124542744
Adcy6	0.2511683	1.05E-06
Adcy7	-0.195889631	0.00358535
Adcy8	-1.082060592	1.30E-05
Adcy9	-0.365707055	0.000298128
Adcyap1r1	1.513621625	2.60E-12
Add1	0.254020528	1.16E-08
Add3	1.465435174	6.01E-112
Adgb	-0.470989814	0.469726592
Adgra2	-0.568715245	6.27E-31
Adgra3	-0.521058281	8.25E-19
Adgrb1	0.837324109	0.259304692
Adgrb2	-0.54767062	0.420182164
Adgrd1	1.955188859	1.23E-09
Adgre1	-0.940384549	0.000482664
Adgre5	0.588587133	2.08E-09
Adgrf3	2.435256372	0.112776659
Adgrf5	-1.239804367	0.473164327
Adgrg1	-1.238852618	4.40E-05
Adgrg2	2.930081939	0.008434331
Adgrg5	-1.077085254	0.154051169
Adgrg6	0.37046315	2.98E-09
Adgrg7	-1.621254516	0.085987298
Adgrl1	-1.131851525	1.93E-27
Adgrl2	-0.608185278	1.09E-38
Adgrl3	-1.176744676	0.003887853
Adgrl4	0.399464293	0.341384686
Adgrv1	0.321474422	0.820867762
Adh1	2.135682828	0.003397949
Adh5	0.291955241	0.000117245
Adh7	4.739867718	2.53E-174
Adhfe1	0.921283345	0.002549059
Adi1	0.360270541	0.002528797
Adig	1.350816747	4.17E-13
Adipoq	-2.271738446	0.132018387
Adipor1	-0.023927495	0.637143782
Adipor2	-0.220416076	0.000354347
Adissp	-0.121869086	0.15480536
Adk	0.806925919	4.05E-28
Adm	0.741400184	7.39E-60
Adm2	-3.680419593	8.87E-31
Adnp	-0.182475455	0.000700476
Adnp2	-0.124612549	0.104036975
Ado	-0.144169902	0.310516526
Adora1	4.794792823	0.000200065
Adora2a	1.576655263	0.018662032
Adora2b	0.615052306	1.09E-05
Adpgk	0.629898961	3.52E-31
Adprh	-0.034416482	0.671240418
Adprhl1	0.196330347	0.888967536
Adprm	-0.195214615	0.091978741
Adprs	-0.10064784	0.16618622
Adra1a	-1.954002364	0.276248261
Adra1b	1.490212285	1.14E-19
Adra1d	-1.456951616	0.00010492
Adra2a	0.318112034	0.002700027
Adra2b	1.187953713	0.01938532
Adrb2	2.195625919	2.82E-09
Adrb3	0.96983563	0.004232502
Adrm1	-0.104711569	0.115654044
Adsl	0.284087238	0.00031777
Adss	-0.20288555	0.000428555
Adss1	1.524774848	0.002606928
Adtrp	-1.133944717	0.257578298
Aebp1	-0.380538085	9.79E-18
Aebp2	0.025519147	0.729907348
Aen	0.255123082	0.000175284
Afap1	-0.598778053	1.96E-33
Afap1l1	-0.805597563	0.212251918
Afap1l2	-0.425372372	5.71E-05
Afdn	-0.070359408	0.250378696
Aff1	-0.17350005	0.002046603
Aff2	0.257708558	0.029668246
Aff3	0.12526051	0.167559055
Aff4	-0.539454501	3.88E-28
Afg1l	0.47118736	0.022281886
Afg2a	-0.745810399	2.69E-07
Afg2b	0.325945829	0.085138785
Afg3l1	-0.263260347	0.001027708
Afg3l2	0.026964266	0.72010835
Afmid	-0.027927629	0.90330554
Aftph	-0.315462029	4.95E-05
Aga	0.100608566	0.079325857
Agap1	-0.622420748	1.70E-26
Agap2	1.496881318	0.372371848
Agap3	-0.049280098	0.530125452
Agbl2	0.850172558	0.046553435
Agbl3	-0.071817643	0.75936517
Agbl5	-1.540151928	1.83E-11
Ager	0.004400714	0.993843743
Agfg1	0.151906201	0.004278657
Agfg2	-0.007197066	0.954317652
Aggf1	0.067272423	0.547863626
Agk	0.006638446	0.944024883
Agl	0.449043188	4.12E-10
Agmat	-0.713840958	0.602533529
Agmo	0.460791657	0.042644088
Ago1	-0.408891483	2.00E-08
Ago2	0.067888437	0.205649317
Ago3	0.187951017	0.1007855
Ago4	0.431750541	0.025665131
Agpat1	-0.026700087	0.665086191
Agpat2	-0.088305287	0.436030404
Agpat3	-0.274914558	0.0011424
Agpat4	0.162274647	0.040941763
Agpat5	0.086827552	0.246857245
Agps	-0.045574567	0.618188141
Agrn	0.049142969	0.553876258
Agrp	-0.487554351	0.747303283
Agt	-0.36532169	0.768420239
Agtpbp1	-0.034430941	0.671488137
Agtr1a	1.580914452	2.35E-106
Agtrap	0.040831569	0.528914608
Ahctf1	-0.003846129	0.957487514
Ahcy	-0.057191199	0.449158398
Ahcyl1	1.092179586	4.47E-187
Ahcyl2	0.035744067	0.712045974
Ahdc1	0.218738385	0.001523085
Ahi1	0.172577526	0.047750032
Ahnak	0.123760222	0.009540964
Ahnak2	-0.339895174	4.16E-10
Ahr	-0.483643319	2.84E-13
Ahrr	1.370180616	1.18E-54
Ahsa1	0.121750062	0.034421017
Ahsa2	-0.438817914	0.004926632
Ahsp	-0.740262961	0.166930369
Aicda	-2.065556685	0.316552679
Aida	0.229943682	3.57E-06
Aif1	-0.881721055	0.001757342
Aif1l	0.326663103	0.007666437
Aifm1	0.03684105	0.621538358
Aifm2	0.149943137	0.006853574
Aifm3	-1.106111237	0.084773419
Aig1	-0.276455715	0.000296018
Aim2	0.382906321	0.835074695
Aimp1	-0.014338904	0.85845754
Aimp2	0.008866773	0.907744106
Aip	0.03632114	0.644133999
Airim	-0.164482213	0.392215231
Ajm1	0.121427663	0.655495023
Ajuba	-0.933990068	1.41E-42
Ak1	-0.161462769	0.005215049
Ak2	0.328689292	5.27E-10
Ak3	-0.042627855	0.360223469
Ak4	-1.166960442	2.67E-40
Ak5	0.692258813	0.329547143
Ak6	-0.072822004	0.698330396
Ak7	0.213101548	0.714855754
Ak8	0.097892936	0.95640283
Ak9	0.071858282	0.959809285
Akap1	-0.07935815	0.183929741
Akap10	-0.236825362	0.013079874
Akap11	-0.097429055	0.096861262
Akap12	0.287057458	2.31E-15
Akap13	0.497427236	6.23E-13
Akap17a	0.035739566	0.663599523
Akap17b	-0.106702456	0.609176789
Akap2	-0.01912404	0.670371057
Akap3	0.4005096	0.575057467
Akap5	-0.942256425	3.36E-06
Akap6	0.070489289	0.845374591
Akap7	0.200497926	0.039530117
Akap8	-0.040006186	0.627258119
Akap8l	0.283795128	0.000345395
Akap9	-0.094124635	0.641313212
Akip1	-0.108602662	0.170470651
Akirin1	-0.428550692	9.07E-12
Akirin2	-0.101412926	0.157992316
Akna	-1.271577629	2.86E-24
Akr1a1	0.089719883	0.116331952
Akr1b1	0.907939617	8.76E-58
Akr1b10	0.420595517	0.471415168
Akr1b8	2.410003373	0
Akr1c1	1.416205071	0.279890894
Akr1c12	-0.01839808	0.957240774
Akr1c12l1	3.587994478	0.176796407
Akr1c13	0.418690399	0.599754692
Akr1c14	0.674939162	9.69E-45
Akr1c15	0.56148235	0.001372348
Akr1c19	0.038927138	0.949115052
Akr1c3	0.541019786	0.596518392
Akr1e2	0.43205584	4.64E-05
Akr7a2	0.396970428	7.32E-05
Akr7a3	2.216213464	0.005358918
Akt1	-0.397854753	5.51E-12
Akt1s1	-0.236545048	0.000543452
Akt2	-0.069439285	0.228517447
Akt3	0.154985126	0.017035266
Aktip	-0.131112686	0.097901891
Alad	-0.101584028	0.364923002
Alas1	-0.131922124	0.113765223
Albfm1	0.4118957	0.499299488
Alcam	0.617492099	2.41E-27
Aldh16a1	-0.211851071	0.001437601
Aldh18a1	-0.620092485	3.58E-34
Aldh1a2	-1.799892649	2.92E-40
Aldh1a3	-4.388846664	0.03545635
Aldh1l1	0.722146441	2.70E-11
Aldh1l2	-1.42906532	1.61E-156
Aldh2	0.285113224	9.06E-07
Aldh3a1	4.446419987	0
Aldh3a2	0.592465107	9.76E-23
Aldh3b1	-0.420166195	0.032012082
Aldh4a1	-0.316383652	3.99E-05
Aldh5a1	0.829824131	1.45E-07
Aldh6a1	0.454648358	6.32E-13
Aldh7a1	0.098068119	0.093085241
Aldh8a1	0.301463796	0.438075061
Aldh9a1	-0.157215879	0.000490974
Aldoa	-0.275823976	0.304849821
Aldoc	-0.251017004	0.018242851
Alg1	-0.003500586	0.976789391
Alg10	0.326406705	4.84E-05
Alg11	-0.237541815	0.045259559
Alg12	0.161406262	0.163548639
Alg13	0.092451217	0.614387297
Alg14	-0.312785738	0.000595242
Alg2	-0.273999762	6.71E-06
Alg3	0.146817413	0.086330777
Alg5	-0.003016759	0.966502149
Alg6	0.390597197	0.009636681
Alg8	0.409178481	2.68E-05
Alg9	0.323164262	1.05E-05
Alk	-2.77682921	0.252323847
Alkal1	-1.250621646	0.02297458
Alkbh1	0.091720114	0.360723169
Alkbh2	0.044668896	0.845240827
Alkbh3	0.032270004	0.685680658
Alkbh4	-0.29204039	0.214960471
Alkbh5	-0.417004642	4.37E-05
Alkbh6	-0.082538236	0.493446009
Alkbh7	0.328418937	0.004737713
Alkbh8	-0.18687605	0.346973623
Alms1	-0.082420182	0.440825611
Alox15	-1.966948322	0.04453397
Alox5	1.074124314	0.046138577
Alox5ap	1.135593832	2.82E-08
Aloxe3	1.287264754	0.047096186
Alpg	-1.16912892	0.390228489
Alpk1	-0.520687546	6.66E-07
Alpk2	-0.248609249	0.52406223
Alpk3	5.770066878	3.18E-05
Alpl	-2.10008025	2.57E-136
Als2	-0.312858099	0.001368157
Als2cl	1.639147774	1.75E-26
Alx1	-0.295042462	0.610706515
Alx4	-0.184032909	0.816377431
Alyref	0.193959114	0.003193553
Amacr	-0.054650421	0.604207035
Ambra1	0.117374921	0.121261734
Amd1	-0.457257737	2.99E-11
Amdhd2	-0.666630104	3.91E-09
Amer1	0.00515582	0.964782489
Amer2	-4.261694759	0.044118004
Amfr	-0.215497994	3.25E-05
Amh	-1.773369593	0.254522649
Amigo1	0.586615413	0.00898817
Amigo2	0.004159619	0.960458434
Amigo3	-0.275962403	0.069738974
Ammecr1	-0.172908511	0.062925743
Ammecr1l	-0.231242076	0.00066117
Amn	1.518071158	0.372970774
Amn1	0.372414101	0.003340083
Amot	-0.179939149	0.002037865
Amotl1	0.170093671	0.000292969
Amotl2	-0.194127624	2.41E-06
Ampd2	0.249432842	0.000824943
Ampd3	0.514326719	0.001279611
Amph	0.819749398	1.93E-26
Amt	-0.337217701	0.404908986
Amz1	0.034231895	0.686076204
Amz2	-0.155932526	0.017891086
Anapc1	0.09181709	0.061036822
Anapc10	0.038803034	0.683366566
Anapc11	0.101489939	0.213840197
Anapc13	0.208281769	0.006509884
Anapc15	-0.383382318	0.000136573
Anapc16	-0.404162825	0.000364333
Anapc2	0.212253456	0.000741236
Anapc4	0.127967446	0.04262081
Anapc5	-0.128053415	0.018752494
Anapc7	-0.085761409	0.322279337
Ang	0.444873388	0.05149384
Angel1	-0.357815527	0.026381245
Angel2	-0.370707282	1.61E-06
Angpt1	1.767255262	1.57E-96
Angpt2	1.245522355	0.004367456
Angpt4	1.651264709	1.54E-161
Angptl1	1.679017475	0.115127968
Angptl2	-0.203103085	0.001317174
Angptl4	-1.049330397	4.01E-23
Angptl6	-0.562359947	0.76138288
Angptl7	-0.33423043	0.788705998
Angptl8	-1.126878598	4.81E-06
Ank1	0.094002494	0.900527127
Ank2	0.0852506	0.236795149
Ank3	0.657005885	7.43E-09
Ankdd1a	0.009946461	0.979741296
Ankdd1b	-0.709316667	0.575099398
Ankef1	-4.110099592	0.064270283
Ankfn1	5.101596858	0.003461685
Ankfy1	0.193841509	0.000313969
Ankh	-0.423913161	1.10E-10
Ankhd1	0.157637593	0.010664313
Ankib1	-0.343616234	8.73E-07
Ankle1	0.519372241	0.103758503
Ankle2	0.378953399	3.49E-07
Ankmy1	-0.976143307	0.028726177
Ankmy2	0.011631977	0.884402199
Ankra2	-0.166430834	0.130186715
Ankrd1	-2.657807326	7.20E-22
Ankrd10	-0.487611486	0.000165369
Ankrd11	-0.121378994	0.012311959
Ankrd12	-0.415195414	1.13E-05
Ankrd13a	-0.099182604	0.069416114
Ankrd13b	0.202839156	0.011858787
Ankrd13c	0.237289202	0.002713362
Ankrd13d	0.216651221	0.222101216
Ankrd16	-0.08853644	0.701595574
Ankrd17	0.099306824	0.030192498
Ankrd2	-3.76552334	0.154129256
Ankrd23	0.351796551	0.664385586
Ankrd24	0.3509701	0.001326272
Ankrd26	0.387760008	0.051110576
Ankrd27	-0.112215599	0.116468481
Ankrd28	1.139904143	3.67E-81
Ankrd29	-0.373672444	0.022259105
Ankrd33b	0.96921596	0.067375667
Ankrd34a	0.248509939	0.40568714
Ankrd36	0.59619608	0.02419192
Ankrd37	-0.91428221	0.000268428
Ankrd39	0.193166766	0.51254242
Ankrd40	0.355255814	2.52E-12
Ankrd42	0.246333145	0.080881272
Ankrd44	1.688357012	1.52E-87
Ankrd45	-1.136948577	4.11E-06
Ankrd46	0.194577538	0.00260672
Ankrd49	0.097975066	0.342324259
Ankrd50	0.239848351	6.24E-05
Ankrd52	0.03151494	0.659974837
Ankrd53	-2.083427242	0.304962219
Ankrd54	0.170306634	0.163912864
Ankrd55	0.669358661	0.033463836
Ankrd6	0.15123908	0.534604814
Ankrd60	-1.249805846	0.126637573
Ankrd66	-2.846981161	0.010082599
Ankrd9	-0.854037987	4.61E-11
Anks1a	-0.13670996	0.157211332
Anks1b	-1.128302722	0.017814678
Anks3	-0.193497042	0.045469657
Anks4b	0.955670651	0.063771555
Anks6	-0.63230248	1.33E-09
Ankzf1	0.051487811	0.644714245
Anln	0.861522242	1.78E-30
Anlnl1	0.837589262	5.29E-12
Ano1	2.390685659	0.207084185
Ano10	0.09676242	0.163567065
Ano3	1.105568634	0.024428059
Ano5	0.941835459	0.079445099
Ano6	-0.11966698	0.006089989
Ano7	1.484171379	0.076114887
Ano8	-0.033506097	0.655897766
Anos1	1.726445111	0.029431195
Anp32a	-0.198271773	0.000445776
Anp32b	0.076935389	0.188306706
Anp32e	0.233133179	0.002454308
Anpep	0.100113112	0.048886323
Antkmt	-0.016104148	0.926805416
Antxr1	-0.278557515	1.05E-09
Antxr2	-0.27547846	1.04E-08
Anxa1	0.574812361	1.13E-31
Anxa11	0.069598515	0.27622975
Anxa2	0.955482933	3.36E-96
Anxa3	-1.388194796	1.84E-56
Anxa4	-0.120505454	0.007271703
Anxa5	0.44140249	4.64E-19
Anxa6	-0.230535675	2.22E-05
Anxa7	0.322031768	1.18E-10
Anxa8	0.069836594	0.82473183
Aoah	0.691745046	0.069240336
Aoc3	-1.213577826	2.08E-87
Aopep	-0.035292552	0.72712142
Aox1	1.919394826	3.25E-220
Aox2	-1.08779752	0.077706468
Aox3	2.426072101	5.93E-19
Ap1ar	-0.095667737	0.347652869
Ap1b1	-0.042983994	0.477713034
Ap1g1	0.154223709	0.001996477
Ap1g2	0.381853518	0.006339921
Ap1m1	0.055761016	0.493143944
Ap1s1	0.225332759	4.59E-06
Ap1s2	1.113463567	2.57E-40
Ap1s3	-0.470010973	0.00719269
Ap2a1	-0.063259978	0.323345147
Ap2a2	0.010844946	0.834440672
Ap2b1	-0.087713273	0.053386331
Ap2m1	-0.041986018	0.468403089
Ap2s1	-0.01086421	0.855685214
Ap3b1	-0.055357632	0.282723634
Ap3b2	-1.151291042	0.326573988
Ap3d1	-0.024078403	0.670872113
Ap3m1	0.210099924	0.004134373
Ap3m2	0.066001049	0.502048068
Ap3s1	-0.819781332	2.32E-39
Ap3s2	-0.069304425	0.338661963
Ap4b1	0.295838778	0.004739631
Ap4e1	0.207151567	0.058195409
Ap4m1	-0.078825813	0.53858457
Ap4s1	-0.000469224	0.997517813
Ap5b1	0.40807057	0.00025614
Ap5m1	0.152095538	0.20149872
Ap5s1	-0.490672689	0.002182843
Ap5z1	-0.079034562	0.381067558
Apaf1	-0.21596798	0.005837758
Apba1	-0.520436964	0.022695315
Apba2	-2.141123454	2.04E-09
Apba3	-0.129919577	0.126191469
Apbb1	0.28575737	0.000331639
Apbb1ip	0.236700878	0.002411778
Apbb2	0.428834922	5.78E-22
Apbb3	0.726911374	3.92E-05
Apc	-0.254422719	1.04E-05
Apc2	-0.179227313	0.093165519
Apcdd1	0.15674772	0.642460157
Apeh	0.06323624	0.44904349
Apela	-5.336253082	0.001784601
Apex1	-0.150310169	0.031313181
Apex2	0.034703699	0.828769128
Aph1a	-0.150962695	0.015168935
Aph1b	-0.113278454	0.686675913
Aph1bl1	-1.870825387	0.000168979
Aph1bl2	-0.228875088	0.155940277
Api5	0.31240246	2.36E-08
Apip	0.502583636	7.06E-06
Aplf	-0.020014145	0.869861595
Apln	-0.398928551	0.001114143
Aplp1	-1.118529356	5.77E-40
Aplp2	-0.642109029	5.25E-61
Apmap	0.047738916	0.535513036
Apoa1	-1.438422069	0.17229317
Apobec1	1.769716253	1.02E-28
Apobec3	0.098933467	0.391268642
Apobr	0.878647348	0.007216395
Apoc3	-1.42875867	0.121375436
Apod	-1.065476852	0.035795171
Apoe	-0.370544373	1.56E-07
Apoh	-0.080957506	0.832199188
Apol11a	1.292788613	0.338157611
Apol2	-1.429681706	0.016120598
Apol3	0.972990272	3.77E-05
Apol9a	0.763234891	1.30E-06
Apold1	1.047483519	5.76E-05
Apom	0.072692195	0.893269076
Apoo	0.227155673	0.104951562
Apool	0.198453731	0.110581596
App	-0.590740515	1.20E-52
Appbp2	-0.195652758	0.000433906
Appl1	-0.004211956	0.952420746
Appl2	0.477992623	1.72E-06
Aprt	0.464551061	2.47E-19
Aptr	0.313862333	0.517815445
Aptx	-0.238206561	0.035128071
Aqp1	1.59574379	3.11E-287
Aqp11	0.404232243	0.361290775
Aqp3	3.190496886	0.007909494
Aqp7	-2.123011194	0.001680317
Aqr	-0.063992674	0.316667631
Ar	-2.019886975	0.08749301
Araf	0.13209671	0.052493005
Arap1	0.049024515	0.468493174
Arap2	-1.201472344	0.031649192
Arap3	-0.48544957	0.709628183
Arc	-0.452337118	0.272628516
Arcn1	-0.032875168	0.442777287
Areg	0.454023465	0.379270274
Arel1	-0.111724014	0.068381754
Arf1	0.054789383	0.25449003
Arf2	-0.641087225	6.26E-19
Arf3	-0.003773143	0.943075634
Arf4	0.096107962	0.012828575
Arf5	-0.029005592	0.623657808
Arf6	-0.120659437	0.037937736
Arfgap1	-0.16254518	0.000904846
Arfgap2	0.145045664	0.086306041
Arfgap3	-0.030384282	0.631072426
Arfgef1	0.026594388	0.720514089
Arfgef2	0.073640925	0.193705955
Arfip1	-0.087308226	0.202611032
Arfip2	-0.145167245	0.058139299
Arfrp1	0.111996802	0.10069788
Arg1	-0.627940751	1.04E-08
Arg2	-0.88115609	0.17187432
Arglu1	-0.1146014	0.27517781
Arhgap1	-0.446149189	2.92E-13
Arhgap10	0.374798031	2.60E-09
Arhgap11a	0.601638964	2.13E-07
Arhgap12	-0.094699371	0.484742401
Arhgap17	-0.209444369	0.001179374
Arhgap18	-0.565660231	6.80E-09
Arhgap19	0.325199626	0.128825949
Arhgap20	1.080312997	0.001029527
Arhgap21	-0.195451829	0.000840976
Arhgap22	-0.636582864	2.20E-15
Arhgap23	-0.304400004	8.45E-11
Arhgap24	-0.548420172	1.70E-12
Arhgap25	-2.105824866	4.50E-10
Arhgap26	-0.892510116	0.000298575
Arhgap27	0.90537193	2.50E-07
Arhgap28	-0.108562212	0.024498221
Arhgap29	-0.7894556	6.79E-28
Arhgap30	-1.052788007	1.10E-05
Arhgap31	-0.139181045	0.017958433
Arhgap32	-0.114079053	0.3198872
Arhgap33	0.767034717	0.006298363
Arhgap35	-0.207507892	8.99E-06
Arhgap39	-0.276614606	0.05262336
Arhgap4	-0.528913208	0.13916801
Arhgap42	-0.525152306	4.34E-09
Arhgap44	-0.322928011	0.063868399
Arhgap45	-1.316842166	3.07E-07
Arhgap5	-0.165152001	0.059386833
Arhgap6	0.715357562	7.04E-11
Arhgap8	2.695186275	4.83E-07
Arhgap9	-2.009940986	2.80E-11
Arhgdia	0.060217616	0.280516381
Arhgdib	-1.663535209	6.36E-55
Arhgdig	1.636279045	0.010273679
Arhgef1	0.078975319	0.18838335
Arhgef10	0.354612778	1.29E-08
Arhgef10l	-0.412334452	1.76E-07
Arhgef11	-0.152516028	0.011902735
Arhgef12	0.074239314	0.166103997
Arhgef16	-0.71489613	0.601213214
Arhgef17	-0.407327483	2.11E-15
Arhgef18	-0.118463344	0.163663642
Arhgef19	-0.527785685	6.57E-07
Arhgef2	-1.034521432	7.52E-69
Arhgef25	-0.46021553	2.89E-16
Arhgef26	0.748435436	2.86E-06
Arhgef28	-0.559470474	0.001702628
Arhgef3	-0.673681785	1.39E-09
Arhgef33	-1.141795116	0.00699951
Arhgef37	3.62733659	0.000802031
Arhgef39	0.758196781	0.005826626
Arhgef4	-0.579104839	0.407865997
Arhgef40	0.083676534	0.158243065
Arhgef5	-0.922170156	8.54E-31
Arhgef6	0.616009662	1.70E-24
Arhgef7	-0.080515581	0.234315347
Arhgef9	-0.141914929	0.316803321
Arid1a	0.099724089	0.107169292
Arid1b	-0.24962383	0.003990672
Arid2	-0.382488392	2.13E-07
Arid3a	-0.483458243	0.022142805
Arid3b	-0.433674921	0.346642273
Arid4a	0.327229129	0.01130983
Arid4b	0.023862085	0.83320135
Arid5a	-0.749640954	3.72E-05
Arid5b	-0.021319422	0.643654744
Arih1	-0.237663639	1.22E-05
Arih2	-0.214782675	0.002915021
Ark2n	-0.188346788	0.063686429
Arl1	0.126910387	0.063881067
Arl10	-0.329626181	0.030582545
Arl11	-0.944881999	2.03E-07
Arl13b	0.038900818	0.800738402
Arl14ep	-0.453384436	2.73E-07
Arl14epl	-2.073604469	0.057655335
Arl15	-0.857471512	1.32E-14
Arl16	-0.105343166	0.23606126
Arl2	-0.419871065	7.45E-06
Arl2bp	-0.074891622	0.219191193
Arl3	0.058250609	0.34346705
Arl4a	0.691183489	6.04E-07
Arl4c	-0.29917397	9.43E-06
Arl4d	-0.172002802	0.369750937
Arl5a	-0.094642935	0.144947629
Arl5b	-0.34514026	0.01545969
Arl6	-0.047324956	0.766346521
Arl6ip1	0.265361865	3.03E-07
Arl6ip4	0.141208641	0.0602392
Arl6ip5	0.764931739	1.56E-53
Arl6ip6	0.297919247	0.015188844
Arl8a	-0.309255481	1.29E-06
Arl8b	0.172094248	0.000135311
Armc1	-0.246165356	0.003992695
Armc10	-0.435311425	1.67E-07
Armc12	3.782440237	0.109336921
Armc2	0.843629836	0.016572967
Armc3	0.189615096	0.879878532
Armc5	-0.344373666	0.000336872
Armc6	0.115032513	0.322473537
Armc7	-0.312220516	0.043574971
Armc8	-0.186469684	0.050400909
Armc9	-0.380052379	8.43E-10
Armcx1	-0.354135592	0.000108921
Armcx2	-0.802345539	1.08E-53
Armcx3	-0.589154102	1.67E-22
Armcx4	-0.738838875	7.59E-17
Armcx5	0.148737065	0.284358826
Armcx6	-1.113146368	2.31E-13
Armh3	-0.004224512	0.964967631
Armh4	1.056813116	0.000452982
Armt1	0.099887242	0.392424233
Arnt	0.076320476	0.225098469
Arnt2	-0.100698871	0.049582403
Arpc1a	-0.157107962	0.012572773
Arpc1b	-0.063627169	0.183151679
Arpc2	-0.019306033	0.621588106
Arpc3	0.244094545	1.02E-06
Arpc4	0.104854015	0.013595999
Arpc5	0.106435544	0.032522531
Arpc5l	-0.754637781	5.34E-09
Arpin	0.405666098	1.19E-06
Arpp19	-0.243133987	4.85E-05
Arrb1	0.418287201	2.90E-13
Arrb2	-0.026911855	0.882625986
Arrdc1	0.398102811	0.000681551
Arrdc2	2.322631859	1.98E-43
Arrdc3	1.074572952	1.39E-43
Arrdc4	-0.01363298	0.895923029
Arsa	-0.272516336	8.41E-05
Arsb	-0.226691704	0.004502224
Arsg	0.001636335	0.994169782
Arsi	-0.947059687	1.33E-41
Arsj	0.956862796	2.65E-14
Arsk	0.128740877	0.177992506
Arsl	-0.222538042	0.002083539
Art3	-4.276979409	0.066817464
Artn	-3.135695182	8.60E-35
Arv1	-0.331851078	0.017830385
Arvcf	-0.121912112	0.335365775
Arxes1	1.185501749	0.372653481
As3mt	-0.426358241	0.000636796
Asah1	-0.418891557	1.28E-15
Asah2	-0.249580815	0.02003621
Asap1	0.427722957	4.82E-24
Asap2	0.34466996	7.49E-05
Asap3	-0.961003901	3.12E-37
Asb1	-0.042415336	0.759005121
Asb12	2.501809586	0.122311876
Asb13	0.302390108	0.145288319
Asb15	0.507494456	0.047133265
Asb3	-0.172830641	0.215632365
Asb5	0.275098841	0.68814844
Asb6	0.024208916	0.814063599
Asb7	-0.032188563	0.774460576
Asb8	0.041720845	0.57262631
Ascc1	-0.018206696	0.834115012
Ascc2	0.260673097	8.61E-05
Ascc3	0.004959297	0.939600215
Ascl2	-0.182686123	0.823779536
Asf1a	0.114788006	0.235986135
Asf1b	0.807006546	2.13E-05
Asgr1	-0.39107207	0.394749249
Asgr2	-4.146299881	0.000411526
Ash1l	-0.123362737	0.049425396
Ash2l	-0.057103162	0.391548312
Asic1	2.296693182	0.052640675
Asic2	-3.157351041	0.132015116
Asic3	-1.065298699	7.90E-06
Asic4	-1.066782278	0.375151903
Asl	0.004947044	0.961893655
Asmtl	-0.31151232	0.002080861
Asns	-1.352952523	1.94E-163
Asnsd1	-0.081374718	0.212378468
Aspa	-0.208241206	0.377454196
Asph	-0.040141732	0.394242284
Asphd1	-3.548661961	0.120641765
Aspm	1.125983241	2.21E-16
Aspn	0.522684981	4.12E-11
Aspscr1	0.307859076	5.13E-05
Asrgl1	0.663517951	1.56E-12
Ass1	3.694066033	9.16E-20
Aste1	0.060956339	0.843266358
Astn1	0.594386378	0.532718754
Astn2	-1.519954096	1.25E-19
Asxl1	-0.007998578	0.897090861
Asxl2	-0.290827501	0.000454918
Asxl3	1.506765326	0.227658683
Asz1	-0.49897188	0.7616302
Atad1	-0.33357359	1.56E-05
Atad2	0.444419643	0.000163751
Atad2b	-0.268620128	0.023176247
Atad3a	0.43020275	1.40E-08
Atad3aos	0.278151453	0.591506159
Atad5	0.186189699	0.461067178
Atat1	-1.116535146	2.41E-16
Atcay	-1.18580647	0.044624794
Ate1	-0.667838706	1.05E-29
Atf1	-0.093073594	0.145108134
Atf2	-0.076746962	0.276900705
Atf3	-1.408001129	1.79E-08
Atf4	-1.092598806	2.99E-154
Atf5	-0.821451984	1.97E-60
Atf6	-0.656315511	3.82E-39
Atf6b	-0.182155272	0.001896834
Atf7	0.208846108	0.001063886
Atf7ip	0.029087579	0.657405479
Atf7ip2	4.238891449	0.041254436
Atg10	-0.243089502	0.17700741
Atg101	-0.10450262	0.187102298
Atg12	-0.019488935	0.774358751
Atg13	0.10946429	0.105675521
Atg14	0.288958146	0.020947259
Atg16l1	-0.09001856	0.199038118
Atg16l2	0.107912001	0.486394605
Atg2a	0.222067356	0.005403193
Atg2b	0.109129259	0.089954396
Atg3	0.029295906	0.65962138
Atg4a	0.645845921	7.66E-10
Atg4b	0.048130156	0.454920914
Atg4c	-0.508649114	2.82E-05
Atg4d	-0.174693827	0.326943863
Atg5	-0.346513217	5.30E-06
Atg7	0.439791547	2.89E-06
Atg9a	0.126068384	0.037428819
Atic	0.237130598	1.20E-05
Atl1	0.149797576	0.577161388
Atl2	0.080542773	0.480115336
Atl3	0.55006897	2.15E-30
Atm	0.123267078	0.155355785
Atmin	-0.127868868	0.318261465
Atn1	0.003462797	0.955590944
Atoh8	2.314890325	3.81E-135
Atosa	0.462786619	2.13E-06
Atosb	-0.332941977	1.65E-07
Atox1	0.021775755	0.811222544
Atp10a	-0.520398551	1.79E-06
Atp10d	0.134384069	0.12303654
Atp11a	-0.446502599	6.26E-26
Atp11b	-0.343463318	2.49E-05
Atp11c	0.212952624	0.073482102
Atp13a1	0.090484577	0.22014959
Atp13a2	-0.030420372	0.759556805
Atp13a3	-0.236216737	0.003945119
Atp1a1	-0.114746358	0.013130484
Atp1a2	2.668481688	0.000767395
Atp1a3	-5.342174718	1.41E-62
Atp1b1	1.011209319	1.40E-51
Atp1b2	0.411708796	0.650713233
Atp1b3	-0.014404344	0.724242068
Atp23	0.05063144	0.720864815
Atp2a1	-0.61044708	0.427126006
Atp2a2	-0.340361932	2.49E-18
Atp2a3	-2.248388343	7.21E-11
Atp2b1	-0.210077928	0.003374027
Atp2b4	1.109715973	8.99E-07
Atp2c1	0.193885396	0.000589756
Atp2c2	-3.061530416	5.70E-07
Atp5f1a	0.283643701	1.94E-09
Atp5f1b	0.082561061	0.10661981
Atp5f1c	0.168967712	0.000981759
Atp5f1d	0.26841497	0.000344091
Atp5f1e	-0.012461909	0.855663162
Atp5if1	0.550426982	7.66E-28
Atp5mc1	-0.064158118	0.333453831
Atp5mc2	-0.065233012	0.265313908
Atp5mc3	0.20449775	0.000932584
Atp5me	0.285260836	3.74E-06
Atp5mf	0.270703863	5.47E-07
Atp5mg	0.190510548	4.24E-05
Atp5mk	0.123243907	0.101007604
Atp5mpl	0.27281382	4.17E-05
Atp5pb	0.049945958	0.317246491
Atp5pd	0.139238016	0.005963746
Atp5pf	0.088469364	0.167497821
Atp5po	0.171314258	0.002495876
Atp6ap1	-0.140651681	0.003671959
Atp6ap1l	-0.488665026	0.302419273
Atp6ap2	-0.236845609	0.001216444
Atp6v0a1	0.035641681	0.52029306
Atp6v0a2	0.03556918	0.539915065
Atp6v0a4	0.141456489	0.862901007
Atp6v0b	-0.319929051	0.001418326
Atp6v0c	-0.074535426	0.1828706
Atp6v0d1	-0.235474446	0.000128853
Atp6v0d2	-0.521599324	0.137343185
Atp6v0e1	-0.002026523	0.9693291
Atp6v0e2	-0.453347441	0.008257837
Atp6v1a	-0.244566702	3.96E-06
Atp6v1b1	1.450426969	0.195502793
Atp6v1b2	-0.277864783	1.45E-06
Atp6v1c1	-0.265483182	2.23E-05
Atp6v1c2	0.191326989	0.290017102
Atp6v1d	-0.065821221	0.158689629
Atp6v1e1	0.167229218	0.000967007
Atp6v1f	-0.322927251	1.76E-08
Atp6v1g1	-0.060191162	0.203880565
Atp6v1g2	-0.505351029	0.527557684
Atp6v1h	-0.033642897	0.686199018
Atp7a	0.045919837	0.424390352
Atp7b	-2.912977655	5.17E-10
Atp8a1	-1.733853887	1.75E-25
Atp8a2	0.060991611	0.458768025
Atp8b1	-1.78320282	2.51E-35
Atp8b2	-0.017488342	0.707981637
Atp8b3	-1.983084623	0.089083384
Atp8b4	-2.554632107	2.10E-37
Atp8b5p	-0.266871067	0.777966413
Atp9a	-0.904461793	6.89E-06
Atp9b	0.104780095	0.060185115
Atpaf1	0.087640555	0.390824907
Atpaf2	-0.009435991	0.926307383
Atpsckmt	-0.219765242	0.1298109
Atr	0.112103609	0.320108756
Atraid	0.224523191	0.003005835
Atrip	0.416780177	0.008636748
Atrn	-0.328612862	4.80E-12
Atrnl1	0.485965141	4.86E-14
Atrx	-0.190325067	0.027818433
Atxn1	0.04285784	0.627008622
Atxn10	0.209908967	1.48E-05
Atxn1l	0.136150536	0.029013114
Atxn2	-0.103206002	0.092059967
Atxn2l	-0.22120185	4.69E-06
Atxn3	0.171925729	0.098342596
Atxn7	-0.393459378	0.000485783
Atxn7l1	-0.370161576	0.000517858
Atxn7l2	-0.642229159	0.000679517
Atxn7l3	-0.4073033	5.96E-11
Atxn7l3b	0.069680142	0.234755488
Auh	0.19224403	0.029395263
Aunip	1.645568152	0.002956666
Aup1	0.395982893	9.07E-08
Aurka	0.732440319	9.93E-08
Aurkaip1	0.062789346	0.366209365
Aurkb	0.845506731	2.23E-11
Aurkc	-0.455828032	0.150184431
Auts2	-0.549918541	2.32E-09
Aven	0.19764364	0.055601344
Avil	-1.167758418	2.29E-07
Avl9	-0.006808211	0.942924527
Avp	-0.085377784	0.943338185
Avpi1	-0.26425705	0.00011979
Avpr1a	1.476776135	7.06E-208
Axdnd1	1.155981349	0.350039964
Axin1	-0.315017779	0.000510285
Axin2	0.256697925	0.227914787
Axl	0.130290673	0.002340081
Azi2	-0.137556961	0.116121891
Azin1	-0.108711024	0.071920052
Azin2	-0.474520163	0.011826076
B2m	-0.511806974	8.45E-33
B3galnt1	-0.038736757	0.536288547
B3galnt2	-0.220129136	0.027941092
B3galt1	-0.066480315	0.874361606
B3galt4	0.318669922	0.150217147
B3galt6	-0.253957681	0.090746543
B3gat3	-0.156104833	0.006602207
B3glct	-0.642316873	6.92E-20
B3gnt2	1.005374859	1.53E-40
B3gnt4	-0.726705535	0.616388425
B3gnt5	0.453655035	0.144124258
B3gnt6	-0.979050954	0.31776434
B3gnt7	-0.975866974	0.023034118
B3gnt8	-0.08717728	0.914651234
B3gnt9	0.636937922	4.50E-15
B3gntl1	0.176616909	0.188145744
B4galnt1	0.517446239	0.004793481
B4galnt2	1.921482014	0.057501492
B4galnt3	0.253200798	0.761594348
B4galnt4	1.279910251	0.059503643
B4galt1	-0.180808858	0.003232764
B4galt2	-0.790094496	3.30E-16
B4galt3	-0.642115232	4.41E-10
B4galt4	-0.310860223	0.000987477
B4galt5	-0.23384049	0.00172535
B4galt6	0.126149166	0.163765422
B4galt7	0.241494928	0.000281959
B4gat1	0.752807178	2.93E-16
B9d1	0.437865108	0.000182519
B9d2	0.164054008	0.35483778
Baalc	1.086862708	0.278569507
Babam1	0.217385297	0.001298113
Babam2	0.130037292	0.037252654
Bace1	0.193572091	0.00196684
Bace2	0.597362724	0.353336274
Bach1	0.568229787	1.62E-14
Bach2	-0.516800983	0.600877142
Bad	0.29490426	0.000300579
Bag1	0.159687489	0.016508881
Bag2	-0.901928426	1.23E-40
Bag3	0.828216449	1.61E-36
Bag4	-0.447815832	6.85E-05
Bag5	-0.07688225	0.349239441
Bag6	0.039866397	0.446207622
Bahcc1	-0.21970259	0.015496796
Bahd1	0.299283474	1.65E-06
Baiap2	1.204230289	9.25E-69
Baiap2l1	1.504543783	7.20E-107
Baiap2l2	-0.442041301	0.807420392
Bak1	0.180542716	0.023254948
Bambi	0.032711502	0.822364604
Banf1	-0.024292524	0.734715683
Banp	-0.106896303	0.249471255
Bap1	0.514411968	1.65E-15
Bard1	0.968919068	3.45E-07
Basp1	-0.607727388	3.35E-54
Batf	-0.325360573	0.22054772
Batf2	-1.549477014	0.298814444
Batf3	4.350412622	0.001443087
Bax	-0.236559076	8.06E-05
Baz1a	0.00488206	0.960999988
Baz1b	0.046161093	0.37215907
Baz2a	0.220689343	0.000123411
Baz2b	0.158092061	0.139213895
Bbc3	-0.063563139	0.613552067
Bbip1	-0.30958947	0.060515091
Bbln	-0.216267758	0.051867368
Bbof1	0.692572768	0.162347282
Bbs1	0.398530475	0.000463476
Bbs10	0.58305431	0.003067081
Bbs12	0.368663183	0.027448875
Bbs2	0.303345894	0.027668033
Bbs4	0.040418177	0.704792672
Bbs5	0.134010498	0.443866154
Bbs7	0.303767549	0.008738105
Bbs9	0.212625096	0.057884375
Bbx	0.409097203	1.30E-08
Bc1	0.449157018	0.549823375
Bcam	-1.772207078	1.63E-05
Bcan	-4.090770344	0.096910047
Bcap29	0.25339388	0.002235589
Bcap31	0.131961112	0.008609725
Bcar1	0.470181563	8.49E-10
Bcar3	-0.002973018	0.968490946
Bcas2	0.14443385	0.074540555
Bcas3	0.363989325	1.01E-05
Bcat1	0.435212829	4.61E-20
Bcat2	-0.141143885	0.029237109
Bccip	0.150004504	0.07718765
Bcdin3d	0.191211651	0.462561387
Bche	0.038797584	0.974342421
Bckdha	0.128811913	0.114743887
Bckdhb	0.166678117	0.115557967
Bckdk	-0.069608805	0.277475982
Bcl10	0.153206001	0.151554608
Bcl11a	-0.514254023	0.503244224
Bcl11b	-0.645967781	0.003272255
Bcl2	-0.204435943	0.75325711
Bcl2a1	-2.021851012	9.88E-11
Bcl2l1	0.625336268	4.27E-32
Bcl2l11	-0.252127459	0.002555013
Bcl2l12	-0.016748074	0.892232649
Bcl2l13	0.148817163	0.029293543
Bcl2l14	-1.072011729	0.014838506
Bcl2l2	-0.256143544	0.000805877
Bcl3	-0.814781411	4.32E-07
Bcl6	0.206768116	0.028405058
Bcl6b	-3.534853308	0.019471794
Bcl7a	0.085972272	0.716285023
Bcl7b	-0.484710035	8.28E-08
Bcl7c	-0.147762612	0.069550045
Bcl9	-0.183087559	0.031623467
Bcl9l	-0.190109574	0.001347721
Bclaf1	0.315612604	5.04E-05
Bclaf3	-0.077050262	0.549834928
Bco1	0.686607629	0.231420601
Bco2	-0.054456004	0.894499491
Bcor	-0.097827417	0.252362969
Bcorl1	-0.212542646	0.028073914
Bcr	-0.144370499	0.085896251
Bcs1l	0.278877085	0.03294278
Bdh1	0.098925992	0.331186294
Bdh2	-0.930720664	1.61E-13
Bdkrb1	-0.01608251	0.935108346
Bdkrb2	0.958552271	0.013481379
Bdnf	-0.15846138	0.274767453
Bdp1	0.126222369	0.217717247
Bean1	-1.042844126	0.143566413
Becn1	-0.123370302	0.023658341
Begain	0.234243932	0.469116777
Bend3	-0.557005481	0.00032642
Bend4	1.874054181	0.080370861
Bend5	-4.433559878	0.006378965
Bend6	0.112814992	0.141116038
Best1	1.460097558	0.163611592
Bet1	-0.097451828	0.205385654
Bet1l	-0.258401079	0.000693216
Bex3	0.146578109	0.059100625
Bfar	0.119925316	0.050948983
Bfsp1	0.792035065	0.037358224
Bfsp2	0.270915821	0.554125863
Bglap	3.139259239	0.022922723
Bgn	-1.07397586	5.97E-105
Bhlhe22	0.621882296	0.632653439
Bhlhe40	-0.573351572	7.60E-17
Bhlhe41	-1.639863634	4.14E-40
Bicc1	-0.173711316	0.000319949
Bicd1	-0.063996496	0.611337665
Bicd2	-0.095585193	0.056995973
Bicdl1	-1.473320242	0.279327514
Bicra	1.217227219	1.67E-81
Bicral	0.152333462	0.124841597
Bid	1.130601269	4.81E-67
Bin1	0.360823416	3.87E-10
Bin2	-0.992414975	0.000100173
Bin3	0.366832236	0.000130551
Birc2	0.059256287	0.535428695
Birc3	-0.241918039	0.309433553
Birc5	0.796683566	1.90E-06
Birc6	0.155280088	0.001061554
Bivm	-0.186660778	0.036023096
Blcap	-0.432164944	2.05E-09
Bles03	0.386180411	4.90E-07
Blm	0.480598435	0.022248839
Blmh	0.280928423	1.40E-05
Blnk	-1.863160194	0.00021664
Bloc1s1	0.043814386	0.590444667
Bloc1s2	0.131346036	0.1213883
Bloc1s3	-0.265887785	0.113664271
Bloc1s4	-0.069354824	0.573333187
Bloc1s5	-0.274967145	0.033242815
Bloc1s6	0.050321758	0.577033207
Bltp1	-0.210569211	0.006588359
Bltp2	-0.114103395	0.023190073
Bltp3a	-0.50813259	3.24E-11
Bltp3b	-0.489812793	4.72E-19
Blvra	0.363752453	9.38E-06
Blvrb	0.997221109	6.75E-31
Blzf1	0.491417906	6.93E-05
Bmal1	0.58026231	8.97E-16
Bmal2	0.613284464	9.75E-11
Bmf	0.368778127	0.016262254
Bmi1	-0.453640225	1.43E-09
Bmp1	-0.533649455	2.68E-21
Bmp2	1.453811952	2.98E-19
Bmp2k	-0.320510423	3.69E-07
Bmp3	-0.330669959	0.008822277
Bmp4	-0.194491926	0.004563326
Bmp5	1.283501606	0.012600344
Bmp6	-0.116360511	0.514082779
Bmp8a	4.583148211	8.69E-37
Bmp8b	-0.547316724	0.273666795
Bmper	-0.973145185	3.38E-11
Bmpr1a	-0.135901215	0.031000281
Bmpr1b	-0.27344019	0.006024815
Bmpr2	-0.298136938	3.46E-07
Bms1	0.5168926	2.91E-14
Bmt2	-0.395452431	0.000841831
Bmx	3.209500433	0.001039307
Bmyc	0.312384618	0.102768031
Bnc2	-0.804516471	2.43E-26
Bnip1	0.070277699	0.574316587
Bnip2	-0.290587803	7.26E-08
Bnip3	-0.729194311	9.51E-36
Bnip3l	-0.175793507	0.000143918
Bnip5	0.842393713	0.473071243
Boc	-0.149255638	0.129364609
Bod1	-0.377396943	0.001320603
Bod1l1	0.319975444	0.000851752
Bok	-0.174513875	0.126178683
Bola1	0.02174187	0.866003443
Bola2	0.438225706	4.41E-13
Bola3	0.349025055	5.42E-05
Bop1	0.294721794	0.004466139
Bora	0.673154251	0.002339011
Borcs5	-0.230050532	0.072694023
Borcs6	0.055043236	0.594508368
Borcs7	-0.089982658	0.268586354
Borcs8	0.247831021	0.003832918
Bpgm	-0.076238495	0.401614867
Bphl	-0.329495095	0.204311786
Bpifb4	-2.772421559	0.253515018
Bpifb5	-1.879391101	0.349842471
Bpnt1	0.184083477	0.016704163
Bpnt2	0.122980085	0.028591603
Bptf	-0.051152145	0.371996925
Braf	-0.0001714	0.998856665
Brap	-0.079826574	0.2610257
Brat1	-0.069127216	0.530362005
Brca1	0.419355247	0.025843483
Brca2	0.166830036	0.381236152
Brcc3	0.074024083	0.434627944
Brd1	-0.183671737	0.011071109
Brd2	0.08945488	0.055975898
Brd3	-0.112379051	0.101092537
Brd3os	-0.33871153	0.187382858
Brd4	0.088803518	0.093426982
Brd7	-0.08567136	0.171893517
Brd8	0.048815755	0.501785465
Brd9	0.065153335	0.396932713
Brdt	0.228150079	0.635546026
Brf1	-0.228776483	0.011246007
Brf2	0.470939442	0.000631418
Bri3	-0.152401167	0.100353481
Bri3bp	0.206263537	0.12833536
Bricd5	-0.798318596	0.47150225
Brinp1	-1.246086386	0.231193029
Brinp2	2.107066374	3.80E-35
Brip1	-0.219432471	0.358070177
Brix1	0.004827874	0.964107536
Brk1	-0.016260756	0.754336631
Brme1	0.067230786	0.568935446
Brms1	0.032785219	0.656858228
Brms1l	-0.096254504	0.257513372
Brox	-0.142831642	0.037516714
Brpf1	0.440665741	4.64E-07
Brpf3	-0.272563498	0.000317807
Brsk1	-0.123831201	0.700632208
Brwd1	0.081656543	0.415503345
Brwd3	0.225914499	0.081944334
Bscl2	-0.005082726	0.936078551
Bsdc1	-0.001691277	0.978445052
Bsg	-0.401747181	3.72E-15
Bsn	1.665373248	9.28E-05
Bst1	0.360834375	1.15E-09
Bst2	0.765002265	0.003410492
Btaf1	0.10161325	0.130094826
Btbd1	-0.097088493	0.105506555
Btbd10	-0.407627931	1.85E-09
Btbd16	-0.916425784	0.184852707
Btbd19	-0.110767207	0.209316525
Btbd2	-0.019589699	0.837746784
Btbd3	-0.061068406	0.675425399
Btbd6	-0.002660153	0.976775155
Btbd7	-0.227300769	0.000498071
Btbd8	-0.24692123	0.281573749
Btbd9	-0.111052562	0.242480231
Btc	-0.110453338	0.868195038
Btd	-0.095303031	0.215385278
Btf3	0.144245582	0.002867247
Btf3l4	-0.154162019	0.058077162
Btg1	0.300189614	2.46E-09
Btg2	0.873346681	4.02E-23
Btg3	-0.221120906	0.000784458
Btk	-1.079698007	0.006483329
Btn1a1	0.760173517	0.499528332
Btn2a2	-1.029119461	1.41E-10
Btnl12	-2.206683808	0.024512931
Btrc	-0.216074015	0.005429173
Bub1	0.519794166	4.29E-05
Bub1b	0.722080497	2.05E-08
Bub3	0.155262887	0.036798698
Bud13	0.058311776	0.61881868
Bud23	0.54698347	1.38E-07
Bud31	-0.235453566	0.001369211
Bves	-2.07838168	4.33E-11
Bysl	-0.077545426	0.360231855
Bzw1	0.099969455	0.049601919
Bzw2	0.169784695	0.01060166
C10h17orf58	-0.433556153	0.00061882
C10h1orf35	0.244841043	0.047746001
C10h5orf15	-0.006473829	0.873645522
C11h3orf38	-0.20307641	0.18758442
C11h3orf70	-0.363251757	9.64E-06
C12h12orf43	0.120296061	0.069788302
C13h1orf116	-1.488166253	0.19030868
C13h2orf76	-0.060608487	0.831860025
C14h1orf146	-1.315852671	0.545210315
C14h4orf36	0.380590345	0.647637054
C14h5orf52	0.679662306	0.455316378
C15h14orf119	0.003165928	0.967442788
C15h8orf58	0.045090791	0.808838221
C16h10orf71	2.127657799	1.88E-11
C16h19orf44	0.200639353	0.070349223
C17h6orf52	0.468603189	0.0585796
C17h6orf62	-0.103420201	0.076803811
C18h18orf32	-0.005757036	0.925375515
C19h16orf46	-0.027085336	0.933841908
C19h19orf53	0.228849757	0.001701111
C19h1orf131	-0.304019011	7.50E-05
C19h1orf198	-0.531709067	1.93E-21
C1d	0.009100576	0.924556556
C1galt1	1.143880866	7.98E-76
C1galt1c1	-0.06489478	0.534821484
C1h10orf143	0.160080349	0.54350331
C1h10orf88	0.062452965	0.746782845
C1h10orf95	-0.746684858	0.516935172
C1h11orf16	-0.484669213	0.617862074
C1h11orf58	0.216577402	3.89E-05
C1h11orf98	0.192840611	0.042199477
C1h15orf40	0.078570082	0.439585261
C1h16orf54	-1.474437327	0.002356213
C1h19orf18	-0.764594706	0.625476121
C1h19orf81	-1.297861839	0.31718885
C1h19orf84	3.138036525	0.13743992
C1h9orf40	-0.105286466	0.490948939
C1h9orf85	0.229901013	0.263039592
C1qa	0.23380823	0.090613513
C1qb	2.290545112	2.59E-64
C1qbp	-0.448232432	2.50E-13
C1qc	2.659414999	3.18E-84
C1ql3	1.00428548	2.30E-05
C1qtnf1	0.76187604	2.38E-46
C1qtnf12	0.602629125	0.030099556
C1qtnf2	-0.029107833	0.793648445
C1qtnf3	-0.63296369	3.33E-11
C1qtnf4	1.515767641	0.331712377
C1qtnf5	0.090151879	0.074634382
C1qtnf6	-0.172952368	0.007239946
C1qtnf7	0.550134586	0.00023827
C1r	-0.1631658	6.79E-05
C1rl	0.27901582	0.080585139
C1s	-0.948604226	8.10E-70
C2	-0.680225856	1.55E-28
C2cd2	-0.484965116	3.70E-12
C2cd2l	-0.196825001	0.044229317
C2cd3	-0.157761143	0.148513398
C2cd4a	-4.428785387	0.007098355
C2cd4c	-0.991819011	0.071464898
C2cd4d	3.584096687	0.185495129
C2cd5	0.261588174	0.033053137
C2h1orf162	-1.842443258	0.172008818
C2h1orf52	-0.332168904	0.002251945
C2h1orf54	0.652205051	0.006723166
C2h3orf33	-0.131325808	0.485020626
C2h4orf3	0.415688656	9.27E-09
C2h4orf33	0.399102966	0.119615731
C2h4orf46	0.507184222	0.006591043
C2h5orf34	0.69502239	0.005818561
C3	-3.872653565	2.23E-263
C3ar1	-0.849591651	0.032874351
C3h11orf91	-0.467072083	0.621031691
C3h20orf144	-2.415218479	0.119786832
C3h9orf50	2.71654344	6.84E-07
C3h9orf78	0.306693597	0.000169474
C4a	-0.405622715	0.047126971
C4b	0.466910588	0.687699301
C4bpa	-0.937497808	0.568200133
C4bpb	1.145612266	0.56812007
C4h2orf81	0.11513698	0.901257562
C4h3orf20	0.255807285	0.407804598
C5	1.061558361	0.46370128
C5ar1	-2.116958282	1.38E-40
C5ar2	1.251702974	1.56E-36
C5h1orf122	-0.238008982	0.009557178
C5h1orf159	0.539777824	0.000447392
C5h1orf174	-0.182076098	0.145102798
C5h1orf50	0.002093516	0.984093836
C5h6orf163	1.001077105	0.442064845
C5h8orf88	-0.855803427	0.328373558
C5h9orf152	-2.103050829	0.351368112
C6	0.58681794	8.96E-07
C6h14orf180	0.977363861	0.01104721
C6h2orf16	-1.652462941	0.665114332
C6h2orf50	0.08471776	0.64704319
C7	0.970615835	0.000139764
C7h8orf33	-0.055141896	0.671920261
C8g	-0.163819802	0.606159153
C8h11orf52	-0.146272755	0.200730467
C8h11orf54	0.236750357	0.015151363
C8h11orf65	2.823633798	0.090579351
C8h11orf71	0.140797213	0.47581242
C8h11orf97	2.815148362	0.197829436
C8h15orf39	-0.510070663	3.90E-06
C8h15orf61	-0.128866618	0.768963386
C8h3orf86	0.343229984	0.707888977
C9h6orf132	-0.518864709	0.226327221
C9h6orf141	-0.130310307	0.461948728
COX1	0.138118425	0.001116694
COX2	-0.212169364	1.61E-05
COX3	-0.036047255	0.333981107
CYTB	0.246758918	3.28E-08
Caap1	0.317211516	0.028986765
Cab39	0.036033916	0.467348115
Cab39l	0.003774684	0.962801363
Cabin1	0.366356136	2.37E-08
Cables1	2.742476606	1.20E-121
Cables2	-0.296403689	0.000809816
Cabp1	-1.526860295	2.66E-05
Cabp7	-0.992167893	0.400992119
Cabyr	-2.340149734	0.046380698
Cacfd1	-0.438533987	5.14E-08
Cachd1	0.149858927	0.176558315
Cacna1a	-0.092491002	0.492065094
Cacna1b	0.528235613	0.000106822
Cacna1c	-0.812875277	2.55E-11
Cacna1d	0.089434648	0.686987985
Cacna1g	1.061285985	8.96E-31
Cacna1h	0.056992622	0.779400975
Cacna1i	-0.951562077	0.000244792
Cacna1s	1.764054199	0.120146047
Cacna2d1	-0.049122063	0.531852226
Cacna2d2	0.251685548	0.156515725
Cacna2d3	0.11220831	0.862119634
Cacnb1	0.45586657	0.284993214
Cacnb2	-0.04239307	0.920914036
Cacnb3	-0.736822762	1.58E-22
Cacnb4	0.123135981	0.939766871
Cacng7	0.008394351	0.994433943
Cactin	0.082868018	0.355589953
Cacul1	-0.239277994	7.34E-05
Cacybp	0.431915964	2.50E-10
Cad	0.021193143	0.733866017
Cadm1	0.395268239	9.18E-08
Cadm3	0.023015201	0.98581783
Cadm4	0.245128802	0.001260279
Cadps2	4.340379917	0.007941829
Cage1	-0.634370947	0.160855555
Cahm	-0.562794012	0.763127203
Calcoco1	0.291070205	4.95E-07
Calcrl	-0.120338715	0.310116988
Cald1	-0.545742177	8.91E-31
Calhm2	0.302932161	9.70E-06
Calhm5	1.238686128	2.43E-08
Calm1	-0.002334735	0.951298175
Calm2	0.169453315	8.50E-06
Calm3	-0.183081167	0.002636213
Calml3	0.397664369	0.164821563
Calml4	0.894996056	0.000357883
Calr	0.346166399	3.80E-18
Calr3	0.142408569	0.381302012
Calr4	-1.329045774	0.572268249
Calu	-0.224200726	3.44E-07
Camk1	0.279313269	9.27E-05
Camk1d	0.251265084	0.032483559
Camk2a	-1.190036031	0.003139214
Camk2b	0.896385624	0.047822161
Camk2d	-0.281406892	5.83E-09
Camk2g	-0.098984607	0.066794772
Camk2n1	0.24802064	0.27812252
Camk2n2	0.079851331	0.845763401
Camkk1	-0.073990349	0.692898586
Camkk2	0.261027794	0.016864571
Camkmt	-0.176189414	0.186125807
Camlg	0.221855561	0.005515258
Camp	-2.256884959	0.052089782
Camsap1	-0.405655393	2.34E-09
Camsap2	-0.166499993	0.006721734
Camta1	0.036898508	0.897362035
Camta2	-0.243277332	9.69E-05
Cand1	0.186296687	0.000104876
Cand2	-0.066913902	0.512245473
Cant1	0.119794957	0.042122452
Canx	0.004997131	0.904015237
Cap1	-0.285425381	4.76E-13
Cap2	-0.498362998	0.015688901
Capg	0.624534292	1.15E-23
Capn1	-0.00905416	0.890612484
Capn10	0.171190604	0.116766693
Capn12	2.026329069	5.20E-06
Capn15	0.003187293	0.977217535
Capn2	0.266546943	7.71E-10
Capn3	-0.745902697	0.073204667
Capn5	0.087173883	0.171712622
Capn6	-1.064828292	0.480282423
Capn7	-0.129400828	0.066522018
Capn9	-4.508801379	0.040136706
Capns1	-0.020325462	0.729931833
Capns2	0.014841757	0.99058271
Caprin1	-0.029343079	0.448047103
Caprin2	-0.041150042	0.761112604
Capza1	0.196904511	7.77E-05
Capza2	0.131727107	0.018688462
Capzb	-0.07417662	0.073067893
Car10	-3.740992492	0.122808321
Car11	0.071949692	0.652662951
Car12	-1.563661033	0.001636
Car13	0.416278717	0.028737702
Car2	-2.404379238	0.051985488
Car3	-2.955178342	1.81E-191
Car4	3.816229225	0.031575652
Car5a	-3.925399557	0.156396641
Car5b	0.912525688	2.40E-71
Car6	-0.446471241	0.157215998
Car7	1.498001365	0.42821363
Car8	0.026097609	0.974819143
Car9	0.797556989	1.58E-27
Card10	-1.32358972	0.107675711
Card14	-1.90089128	3.69E-11
Card19	0.103751595	0.307010123
Card6	0.367370985	4.75E-05
Card9	-0.089145232	0.609786775
Carf	-0.30257551	0.032749746
Carhsp1	0.188454214	0.003281905
Carm1	0.048869895	0.525934091
Carmil1	0.535681144	3.82E-11
Carmil2	0.884909542	0.068393202
Carmil3	0.169470107	0.755458705
Carmn	-1.459174358	4.56E-29
Carnmt1	-0.285925618	0.006508183
Carns1	-0.180070892	0.596898328
Cars1	-0.679490975	6.20E-32
Cars2	0.110691172	0.412649114
Casc3	0.138130219	0.028318371
Casd1	-0.329480391	0.01735831
Cask	0.070384344	0.434405023
Caskin1	0.336582679	0.450154584
Caskin2	-0.469356312	5.27E-06
Casp1	0.865709503	2.19E-14
Casp12	-1.061232215	1.82E-23
Casp14	-2.76708956	0.254888887
Casp2	-0.002632243	0.979399986
Casp3	0.395010765	3.50E-06
Casp4	-2.475599059	2.81E-101
Casp6	-0.295269983	0.035167946
Casp7	0.189840961	0.109334072
Casp8	0.111335959	0.362381503
Casp8ap2	-0.094800359	0.392245442
Casp9	0.102019047	0.368579831
Casq1	-0.320116733	0.232024312
Casq2	-1.341658217	6.16E-18
Cass4	-1.704242705	0.000837901
Cast	0.072431883	0.162275877
Castor1	0.277872332	0.004501721
Castor2	-0.099304191	0.225827441
Cat	0.277628882	7.75E-06
Catip	2.980365491	0.000670422
Catsper2	0.199096818	0.509573367
Catsperd	-0.259988548	0.181989955
Catspere	0.665668716	0.585005015
Catsperg	1.872549993	0.007709608
Catsperz	1.384092998	0.022724824
Cav1	0.654715855	4.29E-63
Cav2	1.094870046	3.59E-44
Cav3	-1.01710137	0.280015208
Cavin1	0.66796972	1.86E-36
Cavin2	1.654020268	7.24E-31
Cavin3	0.330555663	1.23E-08
Cavin4	-0.04123035	0.919288894
Cb707485	-2.235596427	0.256539074
Cbarp	-1.434941755	2.33E-18
Cbfa2t2	-0.293779882	3.63E-05
Cbfa2t3	-3.313833766	0.000104597
Cbfb	-0.051365446	0.44647255
Cbl	0.068113429	0.244850776
Cblb	1.063781993	3.39E-66
Cbll1	-0.112729128	0.283701865
Cbln3	1.636635811	0.361275302
Cbr1	0.062013701	0.694598293
Cbr1l1	-0.613227865	0.611215023
Cbr1l2	0.239039172	0.612339008
Cbr3	0.816871454	7.83E-09
Cbr4	-0.119763657	0.336075532
Cbs	2.630593662	0.282772647
Cbx1	-0.386493708	1.53E-05
Cbx2	0.258244883	0.241697663
Cbx3	-0.139110535	0.065928544
Cbx4	0.02490761	0.805155331
Cbx5	0.002933517	0.976477023
Cbx6	0.028428424	0.541882626
Cbx7	-0.516507228	0.005986223
Cbx8	0.175511755	0.25927639
Cby1	0.162065598	0.16953189
Cby3	-0.073944102	0.962891526
Cc2d1a	-0.153354799	0.044352453
Cc2d1b	0.258062705	1.77E-06
Cc2d2a	0.177461908	0.042994846
Ccar1	0.021093299	0.800639698
Ccar2	0.284720815	6.08E-05
Ccbe1	0.426740416	3.83E-25
Ccdc102a	-0.36873571	1.61E-06
Ccdc103	-0.846519217	0.548044859
Ccdc106	-0.523235968	0.07923798
Ccdc107	-0.177840477	0.005661887
Ccdc110	-3.285696224	0.168780077
Ccdc112	-0.027018268	0.873510009
Ccdc115	0.053918628	0.636227427
Ccdc116	-0.119213377	0.865756211
Ccdc117	-0.17250521	0.135358545
Ccdc12	0.19186722	0.06586918
Ccdc120	-0.505841035	0.00170204
Ccdc122	-0.595460252	0.079460881
Ccdc124	0.041206535	0.566539991
Ccdc125	0.276684321	0.268864527
Ccdc126	-0.601760958	4.49E-11
Ccdc127	0.047537602	0.602295386
Ccdc134	1.459720082	1.28E-69
Ccdc136	-0.211976992	0.115343879
Ccdc137	0.042221799	0.694650896
Ccdc138	0.841903203	0.003595941
Ccdc14	0.210500141	0.226355765
Ccdc141	0.881533344	0.031848429
Ccdc142	0.391782184	0.046487687
Ccdc146	1.223511139	0.089519932
Ccdc149	0.218503764	0.136863017
Ccdc15	0.214491594	0.268565896
Ccdc150	-0.3519271	0.710335281
Ccdc153	-2.490206615	0.083552057
Ccdc157	-0.171819899	0.322542796
Ccdc158	-0.447051083	0.462665551
Ccdc159	-0.312187465	0.084222043
Ccdc162	0.915686877	0.009218195
Ccdc163	0.57898942	0.178141153
Ccdc167	-0.064677394	0.713329029
Ccdc168	0.563292396	0.708132842
Ccdc17	0.518901683	6.71E-05
Ccdc170	-1.473383495	0.133537401
Ccdc171	-0.007890243	0.97609785
Ccdc174	-0.018848174	0.898056955
Ccdc177	2.179658918	0.068794938
Ccdc18	0.603357425	0.100797792
Ccdc180	-2.775431261	0.111192514
Ccdc181	-0.128757898	0.490460802
Ccdc183	-3.672898075	0.054645076
Ccdc184	-0.493898863	0.574356605
Ccdc186	-0.119784191	0.115890539
Ccdc191	0.609692431	0.005320997
Ccdc22	0.042759312	0.681904865
Ccdc24	-2.882230173	0.093146638
Ccdc25	0.048729366	0.59106762
Ccdc28a	0.236263439	0.10161694
Ccdc28b	0.725785433	0.042786084
Ccdc3	2.40564179	0.003002024
Ccdc30	-0.543618465	0.330406806
Ccdc32	0.028024285	0.756216074
Ccdc34	0.4720858	0.007609001
Ccdc39	0.811748341	0.012558664
Ccdc40	0.843064304	0.340830146
Ccdc43	-0.136212396	0.192657779
Ccdc47	-0.137104287	0.019457011
Ccdc50	-0.877180575	3.16E-50
Ccdc51	0.029732871	0.845532675
Ccdc57	0.046008978	0.817901596
Ccdc59	-0.033653679	0.802930727
Ccdc6	-0.321940576	1.51E-07
Ccdc61	0.143424667	0.358198959
Ccdc62	0.069824531	0.706498135
Ccdc65	-0.683069931	9.84E-06
Ccdc66	0.251578033	0.046687108
Ccdc69	0.668933835	0.317805065
Ccdc71	0.25809452	3.38E-05
Ccdc71l	0.246878545	0.033258414
Ccdc74a	1.111627676	0.008932746
Ccdc77	0.368359646	0.020252667
Ccdc78	1.726211122	0.270090802
Ccdc8	0.282440284	0.000809578
Ccdc80	-1.395781398	0
Ccdc82	0.401976116	0.013562466
Ccdc83	0.509288248	0.730714672
Ccdc85a	-3.25025692	0.019784719
Ccdc85b	0.620639485	3.51E-13
Ccdc85c	-0.199944371	0.09608019
Ccdc86	-0.268924905	0.001642786
Ccdc88a	-0.062617759	0.554709139
Ccdc88b	0.033950344	0.936922377
Ccdc88c	1.695676743	0.091897068
Ccdc89	-1.185212766	0.295341691
Ccdc9	0.040669417	0.638185729
Ccdc90b	-0.137887352	0.196199797
Ccdc91	-0.283099651	0.000173156
Ccdc92	0.146082745	0.333690174
Ccdc92b	-0.425479502	0.487118039
Ccdc93	0.280079331	0.00067912
Ccdc96	0.482743371	0.278292997
Ccdc97	0.005861473	0.937772411
Ccdc9b	0.241481176	0.000175006
Ccer2	-1.478453984	0.245076703
Cchcr1	-0.3424518	0.000371454
Ccl11	-1.07602425	0.094517206
Ccl12	-9.851315495	1.49E-16
Ccl2	-1.324822738	1.65E-156
Ccl20	-3.937861382	1.75E-112
Ccl27	-0.044710508	0.94128197
Ccl3	-1.401623594	0.000368573
Ccl4	-3.792087741	3.03E-08
Ccl5	-0.890433148	0.431380189
Ccl6	-6.619826792	5.04E-05
Ccl7	-0.872560521	3.37E-50
Ccl9	-4.58747261	1.51E-05
Ccm2	0.005858222	0.935232398
Ccn1	-0.188164798	0.000190492
Ccn2	0.386902523	9.67E-27
Ccn3	1.562931617	1.54E-286
Ccn4	-0.811129353	3.56E-44
Ccn5	-0.604248748	3.16E-29
Ccna1	0.391908893	0.442432935
Ccna2	0.872767995	1.00E-14
Ccnb1	1.037790149	1.68E-21
Ccnb1ip1	-0.589449152	0.695919771
Ccnb2	0.941862159	2.59E-12
Ccnc	0.086310428	0.383147618
Ccnd1	1.499483031	0
Ccnd2	-0.3941086	2.57E-05
Ccnd3	0.755029617	1.68E-29
Ccndbp1	0.095358408	0.262416905
Ccne1	0.176118054	0.091753934
Ccne2	0.941886028	1.00E-06
Ccnf	0.815710423	7.01E-11
Ccng1	0.458339531	6.33E-25
Ccng2	-0.212643584	0.00229515
Ccnh	0.087559717	0.316859265
Ccni	-0.266762008	7.97E-07
Ccnj	-0.164887663	0.318246536
Ccnjl	-1.328795687	0.005052659
Ccnk	0.239128265	0.003128735
Ccnl1	0.038374288	0.700579836
Ccnl2	0.343597968	4.29E-05
Ccno	0.632622507	0.686004458
Ccnq	-0.142810897	0.353764059
Ccnt1	-0.075951263	0.423852456
Ccnt2	-0.197735257	0.016658931
Ccny	-0.040536932	0.536628826
Ccnyl1	0.042259678	0.556488533
Ccp110	0.141831136	0.392783861
Ccpg1	0.204683416	0.001347316
Ccr1	0.796007164	4.22E-06
Ccr5	-2.475715772	9.56E-08
Ccrl2	0.827444442	0.257766363
Ccs	0.137403618	0.037972307
Ccsap	0.229986162	0.300940658
Ccser2	-0.121723476	0.048611639
Cct2	-0.184771144	4.76E-05
Cct3	0.157273888	0.000867658
Cct4	0.111070595	0.008848857
Cct5	0.268716406	5.40E-09
Cct6a	0.385656388	3.06E-11
Cct6b	-0.606502395	0.295317125
Cct7	0.104823156	0.0389453
Cct8	0.354234983	3.61E-11
Cct8l2	0.674074193	0.417027333
Ccz1	0.052066919	0.414630903
Cd101	0.742060603	0.686546445
Cd109	0.701279545	1.57E-07
Cd14	0.458512974	4.02E-09
Cd151	0.393556963	2.69E-13
Cd163	1.189365028	1.20E-25
Cd164	0.121552506	0.001867557
Cd164l2	-2.244424525	0.095225132
Cd180	-1.58141007	2.10E-06
Cd1d1	-0.484338162	8.26E-05
Cd2	-1.409072431	0.000256377
Cd200	-0.235263326	0.05975386
Cd200r1	-0.04866101	0.76867239
Cd200r1l	0.881193383	0.061416023
Cd209d	-3.56062596	0.061907174
Cd24	-0.76649846	0.055454364
Cd244	2.260024136	0.300215074
Cd247	2.813440852	0.225176369
Cd248	0.223164138	0.001091916
Cd274	-0.312313249	0.128131648
Cd276	-0.203597126	0.008255583
Cd28	-1.132322637	0.013449515
Cd2ap	0.049312722	0.763038526
Cd2bp2	-0.207515948	8.14E-05
Cd300a	-1.030516032	0.003233703
Cd300c2	1.616785252	0.038929207
Cd300e	0.403073658	0.427415854
Cd300lb	-2.805741335	0.192550301
Cd300ld	-2.286326506	0.000681339
Cd300le	-1.063786289	3.32E-10
Cd300lf	-3.387584525	2.80E-08
Cd302	0.251090504	0.002883607
Cd320	-0.474798488	1.06E-07
Cd33	-0.824746246	0.009663175
Cd34	0.621639128	0.103166586
Cd36	3.449019815	7.99E-05
Cd37	-1.13758429	0.013083906
Cd38	0.002303602	0.97196878
Cd4	-0.675214896	2.53E-12
Cd40	-0.961260388	0.004249817
Cd44	0.629623549	9.46E-49
Cd46	0.42934507	0.279043545
Cd47	0.183130693	5.48E-05
Cd48	0.197929765	0.013798869
Cd53	-1.166094353	7.07E-18
Cd55	-0.527391234	2.53E-24
Cd59b	0.053053461	0.473036297
Cd5l	-1.992294041	2.56E-07
Cd6	-4.139260948	0.017387546
Cd63	-0.035949901	0.454679738
Cd68	-0.847813296	2.08E-20
Cd7	2.820079303	0.223610984
Cd74	-1.325978212	0.048649076
Cd79a	2.824634508	0.084727313
Cd80	0.142035954	0.26162691
Cd81	0.579769241	6.06E-33
Cd82	-0.209327201	4.42E-06
Cd83	-1.732924969	6.07E-07
Cd84	-2.005122531	1.51E-07
Cd86	-1.270147611	0.27403809
Cd8a	-4.063227997	6.48E-41
Cd8b	-2.444356423	8.31E-09
Cd9	-0.391921636	1.77E-16
Cd93	-0.087025919	0.646517214
Cd99	0.104704154	0.046648
Cda	-1.016177596	0.121297255
Cdadc1	0.339297251	8.33E-05
Cdan1	0.002820951	0.978493585
Cdc123	0.089297793	0.148791171
Cdc14a	-0.49892954	0.000966916
Cdc14b	-0.494234619	4.65E-06
Cdc16	0.297229049	2.42E-06
Cdc20	0.97672068	6.57E-29
Cdc23	0.244791596	0.000124885
Cdc25a	0.260451614	0.021457932
Cdc25b	0.675509348	2.37E-10
Cdc25c	0.383442867	0.000562129
Cdc26	-0.099011605	0.317378218
Cdc27	-0.083085985	0.170644583
Cdc34	-0.011530191	0.883291523
Cdc37	0.082262584	0.155039742
Cdc37l1	-0.057552135	0.512217787
Cdc40	0.395101464	0.000179485
Cdc42	0.138963204	0.000812641
Cdc42bpa	-0.471300327	1.66E-17
Cdc42bpb	0.102415406	0.034770026
Cdc42bpg	-1.052366681	1.75E-21
Cdc42ep1	-0.862342534	6.64E-28
Cdc42ep2	0.325503401	0.012553626
Cdc42ep3	-0.169933	0.029450113
Cdc42ep4	-0.044351152	0.581402977
Cdc42ep5	-0.258005234	0.008340935
Cdc42se1	-0.239107236	0.001500253
Cdc42se2	-0.829107814	1.28E-34
Cdc45	0.108252673	0.667032806
Cdc5l	-0.039699433	0.526766194
Cdc6	0.613775081	0.012391318
Cdc7	0.408714373	0.016827578
Cdc73	0.136456575	0.159728664
Cdca2	0.619762828	0.000469058
Cdca3	0.743398847	5.99E-06
Cdca4	-0.073020823	0.410870849
Cdca5	0.574333145	0.014125769
Cdca7	1.371804697	1.85E-07
Cdca7l	2.169929574	1.25E-13
Cdca8	0.806064726	7.52E-14
Cdh1	-0.224529082	0.865622267
Cdh10	1.137321885	0.11845767
Cdh11	-0.277288686	7.30E-11
Cdh13	0.077961585	0.326069887
Cdh15	-0.316262345	0.690815073
Cdh16	0.871760693	0.42980771
Cdh17	-0.541263904	0.488879069
Cdh18	3.036276009	1.49E-13
Cdh2	-0.476724868	2.64E-18
Cdh23	0.573566486	0.373920444
Cdh24	0.372743564	0.058139613
Cdh26	3.77575951	0.110466357
Cdh3	-1.316647467	4.28E-50
Cdh4	3.946304577	0.10896913
Cdh6	2.221072981	7.10E-06
Cdh7	-1.570791419	0.006878855
Cdhr1	-1.124486374	4.41E-73
Cdhr2	-1.014338489	0.00010677
Cdhr5	0.223656562	0.698767649
Cdin1	0.204871776	0.376120565
Cdip1	-0.10879718	0.176961412
Cdipt	-0.078091697	0.274434829
Cdk1	0.654602513	1.38E-10
Cdk10	-0.075680509	0.33944465
Cdk11b	0.214819024	0.00027938
[truncated: 14,985 more rows]
