# Supplementary material for: Peptide-based Self-adaptive Implant Coating Sequentially Regulates Bone Regeneration to Enhance Interfacial Osseointegration
Source: Research Square preprint supplement (doi:10.21203/rs.3.rs-5132912/v1), 2024-10-01
Supplement: Supplementary file 41 [file 0-GO-Top20 all.xlsx]

## Sheet: demo_bubble_data
Term_ID	Term_description	ListHit	FoldEnrichment	p-value
GO:0031012	extracellular matrix	71	3.66401	3.19826e-22
GO:0006954	inflammatory response	83	3.04612	3.25717e-20
GO:0005615	extracellular space	206	1.86516	3.16752e-19
GO:0005576	extracellular region	139	1.96609	6.44663e-15
GO:0009986	cell surface	111	2.15452	9.30958e-15
GO:0009410	response to xenobiotic stimulus	81	2.44463	5.30336e-14
GO:0032496	response to lipopolysaccharide	55	3.04625	7.98056e-14
GO:0009612	response to mechanical stimulus	28	4.45657	8.89024e-12
GO:0030198	extracellular matrix organization	39	3.38908	1.11024e-11
GO:0030593	neutrophil chemotaxis	24	4.65246	9.94228e-11
GO:0062023	collagen-containing extracellular matrix	44	2.85537	2.24731e-10
GO:0007568	aging	54	2.53573	2.25881e-10
GO:0010628	positive regulation of gene expression	80	2.082	3.13101e-10
GO:0030282	bone mineralization	20	5.12559	5.18856e-10
GO:0071222	cellular response to lipopolysaccharide	43	2.755	1.14701e-09
GO:0008284	positive regulation of cell population proliferation	80	2.00604	1.83077e-09
GO:0005886	plasma membrane	475	1.25542	2.13229e-09
GO:0008083	growth factor activity	32	3.2257	2.87097e-09
GO:0032760	positive regulation of tumor necrosis factor production	29	3.45271	3.03028e-09
GO:0009617	response to bacterium	35	2.98993	4.41843e-09
GO:0007155	cell adhesion	62	2.17511	5.95882e-09
GO:0051384	response to glucocorticoid	28	3.44206	6.07648e-09
GO:0071347	cellular response to interleukin-1	26	3.60672	7.41538e-09
GO:0007267	cell-cell signaling	23	3.95195	8.34245e-09
GO:0042060	wound healing	29	3.22422	1.5844e-08
GO:0001968	fibronectin binding	14	6.0482	1.78223e-08
GO:0043025	neuronal cell body	80	1.87541	3.81585e-08
GO:0009897	external side of plasma membrane	68	1.99262	3.98366e-08
GO:0005509	calcium ion binding	85	1.80765	7.53541e-08
GO:0016323	basolateral plasma membrane	44	2.35089	1.02797e-07
GO:0051015	actin filament binding	37	2.5546	1.24896e-07
GO:0014070	response to organic cyclic compound	43	2.33878	1.65965e-07
GO:0005539	glycosaminoglycan binding	11	6.65302	1.9118e-07
GO:0050900	leukocyte migration	12	5.85309	2.89538e-07
GO:0071356	cellular response to tumor necrosis factor	29	2.81086	3.63795e-07
GO:0001525	angiogenesis	41	2.32187	3.89259e-07
GO:0007169	transmembrane receptor protein tyrosine kinase signaling pathway	24	3.15558	4.09261e-07
GO:0043204	perikaryon	36	2.47426	4.13084e-07
GO:0032355	response to estradiol	33	2.57204	5.02296e-07
GO:0008217	regulation of blood pressure	19	3.6832	5.38428e-07
GO:0019800	peptide cross-linking via chondroitin 4-sulfate glycosaminoglycan	6	12.9604	5.47102e-07
GO:0005178	integrin binding	29	2.75783	5.5124e-07
GO:0001503	ossification	22	3.26128	6.79958e-07
GO:0014065	phosphatidylinositol 3-kinase signaling	14	4.70415	6.85231e-07
GO:0033627	cell adhesion mediated by integrin	13	5.04016	7.01607e-07
GO:0032869	cellular response to insulin stimulus	26	2.91209	7.121e-07
GO:0008009	chemokine activity	13	4.91416	9.76676e-07
GO:0005518	collagen binding	17	3.83654	1.14189e-06
GO:0030424	axon	62	1.88247	1.14745e-06
GO:0010575	positive regulation of vascular endothelial growth factor production	11	5.73536	1.15968e-06
GO:0001666	response to hypoxia	39	2.27683	1.22666e-06
GO:0005604	basement membrane	24	2.92655	1.71743e-06
GO:0014068	positive regulation of phosphatidylinositol 3-kinase signaling	19	3.42011	1.81131e-06
GO:0031100	animal organ regeneration	19	3.42011	1.81131e-06
GO:0043410	positive regulation of MAPK cascade	32	2.46865	1.87662e-06
GO:0061098	positive regulation of protein tyrosine kinase activity	12	5.04016	1.88392e-06
GO:0002687	positive regulation of leukocyte migration	10	6.0482	2.02239e-06
GO:0030335	positive regulation of cell migration	39	2.21691	2.40114e-06
GO:0045766	positive regulation of angiogenesis	28	2.59738	2.94733e-06
GO:0016477	cell migration	41	2.14512	3.1277e-06
GO:0071466	cellular response to xenobiotic stimulus	20	3.18326	3.21334e-06
GO:0098978	glutamatergic synapse	77	1.69226	3.96459e-06
GO:0001501	skeletal system development	22	2.94381	4.14515e-06
GO:0060100	positive regulation of phagocytosis, engulfment	8	7.11552	5.08494e-06
GO:0086004	regulation of cardiac muscle cell contraction	8	7.11552	5.08494e-06
GO:0008305	integrin complex	9	6.18566	5.33436e-06
GO:0006813	potassium ion transport	16	3.61086	5.52636e-06
GO:0007200	phospholipase C-activating G protein-coupled receptor signaling pathway	16	3.61086	5.52636e-06
GO:0070542	response to fatty acid	13	4.27318	5.6879e-06
GO:0007166	cell surface receptor signaling pathway	29	2.46345	5.84843e-06
GO:0042802	identical protein binding	174	1.37964	5.85973e-06
GO:0120162	positive regulation of cold-induced thermogenesis	20	3.05464	6.24694e-06
GO:0070098	chemokine-mediated signaling pathway	13	4.18226	7.38932e-06
GO:0050729	positive regulation of inflammatory response	20	2.99416	8.57756e-06
GO:0032570	response to progesterone	15	3.65818	9.09796e-06
GO:0005125	cytokine activity	31	2.32047	9.95815e-06
GO:0051216	cartilage development	18	3.16475	1.07236e-05
GO:0070374	positive regulation of ERK1 and ERK2 cascade	35	2.17785	1.15122e-05
GO:0071260	cellular response to mechanical stimulus	20	2.93602	1.16649e-05
GO:0032755	positive regulation of interleukin-6 production	21	2.83509	1.25316e-05
GO:0007229	integrin-mediated signaling pathway	18	3.12838	1.26947e-05
GO:0050731	positive regulation of peptidyl-tyrosine phosphorylation	22	2.74918	1.30979e-05
GO:0071372	cellular response to follicle-stimulating hormone stimulus	10	5.04016	1.37018e-05
GO:0016324	apical plasma membrane	54	1.82256	1.41842e-05
GO:0071300	cellular response to retinoic acid	16	3.36011	1.47909e-05
GO:0002931	response to ischemia	17	3.2131	1.51563e-05
GO:0043005	neuron projection	64	1.7158	1.66781e-05
GO:0008360	regulation of cell shape	25	2.52008	1.68488e-05
GO:0010759	positive regulation of macrophage chemotaxis	9	5.44338	1.82766e-05
GO:0045121	membrane raft	43	1.95838	1.87242e-05
GO:0010259	multicellular organism aging	12	4.12377	1.93643e-05
GO:0010811	positive regulation of cell-substrate adhesion	12	4.12377	1.93643e-05
GO:0032731	positive regulation of interleukin-1 beta production	15	3.43648	2.04338e-05
GO:0030018	Z disc	24	2.5377	2.18993e-05
GO:0050873	brown fat cell differentiation	11	4.37698	2.32041e-05
GO:0045429	positive regulation of nitric oxide biosynthetic process	12	4.03213	2.4827e-05
GO:0060048	cardiac muscle contraction	12	3.94448	3.15819e-05
GO:0071456	cellular response to hypoxia	26	2.38262	3.1653e-05
GO:0050840	extracellular matrix binding	10	4.58197	3.51675e-05
GO:0001725	stress fiber	15	3.28706	3.57899e-05
GO:0010033	response to organic substance	23	2.52008	3.61031e-05
GO:0010744	positive regulation of macrophage derived foam cell differentiation	7	6.61521	3.66738e-05
GO:0043235	receptor complex	32	2.13152	4.13099e-05
GO:0016020	membrane	258	1.25397	4.13488e-05
GO:0098609	cell-cell adhesion	28	2.26403	4.14119e-05
GO:0030509	BMP signaling pathway	18	2.86494	4.43018e-05
GO:0007160	cell-matrix adhesion	19	2.7624	4.65396e-05
GO:0043392	negative regulation of DNA binding	10	4.4472	4.68826e-05
GO:0071560	cellular response to transforming growth factor beta stimulus	17	2.95458	4.75921e-05
GO:0032733	positive regulation of interleukin-10 production	12	3.78012	4.99941e-05
GO:0005581	collagen trimer	15	3.19447	5.09777e-05
GO:0034113	heterotypic cell-cell adhesion	9	4.86016	5.15651e-05
GO:0007154	cell communication	6	7.56025	5.40661e-05
GO:0071223	cellular response to lipoteichoic acid	6	7.56025	5.40661e-05
GO:0045087	innate immune response	56	1.71406	5.67675e-05
GO:0032526	response to retinoic acid	16	3.0241	5.86922e-05
GO:0005172	vascular endothelial growth factor receptor binding	5	9.45031	5.94221e-05
GO:0070295	renal water absorption	5	9.45031	5.94221e-05
GO:0071549	cellular response to dexamethasone stimulus	14	3.30761	6.01304e-05
GO:0009611	response to wounding	19	2.71028	6.10284e-05
GO:0001784	phosphotyrosine residue binding	12	3.70298	6.2257e-05
GO:0048661	positive regulation of smooth muscle cell proliferation	17	2.88818	6.43163e-05
GO:0006953	acute-phase response	11	3.96013	6.46152e-05
GO:0008201	heparin binding	28	2.20507	6.67684e-05
GO:0001649	osteoblast differentiation	18	2.77723	6.79081e-05
GO:0005080	protein kinase C binding	13	3.44853	6.92146e-05
GO:0030316	osteoclast differentiation	13	3.44853	6.92146e-05
GO:0042110	T cell activation	13	3.38908	8.38634e-05
GO:0007179	transforming growth factor beta receptor signaling pathway	17	2.82471	8.60177e-05
GO:0015211	purine nucleoside transmembrane transporter activity	4	12.0964	9.02416e-05
GO:0032238	adenosine transport	4	12.0964	9.02416e-05
GO:0034154	toll-like receptor 7 signaling pathway	4	12.0964	9.02416e-05
GO:1903352	L-ornithine transmembrane transport	4	12.0964	9.02416e-05
GO:0002070	epithelial cell maturation	6	6.97869	9.47817e-05
GO:0061459	L-arginine transmembrane transporter activity	6	6.97869	9.47817e-05
GO:0001540	amyloid-beta binding	15	3.0241	9.90301e-05
GO:0030552	cAMP binding	8	5.04016	0.000101314
GO:0010332	response to gamma radiation	11	3.78012	0.000102449
GO:0043200	response to amino acid	12	3.48934	0.000115805
GO:0043524	negative regulation of neuron apoptotic process	27	2.17156	0.000116263
GO:0005201	extracellular matrix structural constituent	13	3.27611	0.00012136
GO:1900745	positive regulation of p38MAPK cascade	9	4.38982	0.000125655
GO:0002638	negative regulation of immunoglobulin production	5	8.40027	0.000126392
GO:0045730	respiratory burst	5	8.40027	0.000126392
GO:0050839	cell adhesion molecule binding	15	2.94555	0.000135295
GO:0030728	ovulation	7	5.57071	0.00013544
GO:0048247	lymphocyte chemotaxis	8	4.83856	0.000140391
GO:0045600	positive regulation of fat cell differentiation	12	3.42351	0.000140783
GO:0015629	actin cytoskeleton	29	2.07817	0.000145829
GO:0005614	interstitial matrix	6	6.48021	0.000156585
GO:0032963	collagen metabolic process	6	6.48021	0.000156585
GO:0046888	negative regulation of hormone secretion	6	6.48021	0.000156585
GO:0045786	negative regulation of cell cycle	11	3.61577	0.000157726
GO:0060395	SMAD protein signal transduction	14	3.0241	0.00016736
GO:0014823	response to activity	17	2.67759	0.000170563
GO:0016525	negative regulation of angiogenesis	17	2.67759	0.000170563
GO:0019901	protein kinase binding	60	1.60856	0.000186404
GO:0009636	response to toxic substance	19	2.49817	0.000187812
GO:0001934	positive regulation of protein phosphorylation	35	1.90366	0.000189163
GO:0008307	structural constituent of muscle	8	4.65246	0.000191091
GO:0005901	caveola	16	2.74918	0.000191226
GO:0009408	response to heat	16	2.74918	0.000191226
GO:0051781	positive regulation of cell division	11	3.53884	0.000193736
GO:0030971	receptor tyrosine kinase binding	14	2.98151	0.000195945
GO:0006885	regulation of pH	7	5.29217	0.00019651
GO:0001822	kidney development	27	2.09361	0.000215028
GO:0043197	dendritic spine	29	2.03007	0.0002195
GO:0002675	positive regulation of acute inflammatory response	5	7.56025	0.000238991
GO:0050795	regulation of behavior	5	7.56025	0.000238991
GO:0007162	negative regulation of cell adhesion	12	3.24011	0.000245128
GO:0035810	positive regulation of urine volume	6	6.0482	0.000246389
GO:0097242	amyloid-beta clearance	6	6.0482	0.000246389
GO:0005921	gap junction	8	4.48015	0.000255903
GO:0007422	peripheral nervous system development	8	4.48015	0.000255903
GO:0045780	positive regulation of bone resorption	8	4.48015	0.000255903
GO:0000064	L-ornithine transmembrane transporter activity	4	10.0803	0.000256472
GO:0001660	fever generation	4	10.0803	0.000256472
GO:0014005	microglia development	4	10.0803	0.000256472
GO:0015860	purine nucleoside transmembrane transport	4	10.0803	0.000256472
GO:0097638	L-arginine import across plasma membrane	4	10.0803	0.000256472
GO:2000121	regulation of removal of superoxide radicals	4	10.0803	0.000256472
GO:0044344	cellular response to fibroblast growth factor stimulus	10	3.68792	0.000262212
GO:1904707	positive regulation of vascular associated smooth muscle cell proliferation	10	3.68792	0.000262212
GO:0060135	maternal process involved in female pregnancy	9	4.00248	0.000273049
GO:0005243	gap junction channel activity	7	5.04016	0.000278006
GO:0030224	monocyte differentiation	7	5.04016	0.000278006
GO:0048020	CCR chemokine receptor binding	7	5.04016	0.000278006
GO:0001975	response to amphetamine	11	3.3944	0.0002869
GO:0043491	protein kinase B signaling	12	3.18326	0.000292038
GO:0001568	blood vessel development	14	2.86063	0.000308287
GO:0051591	response to cAMP	14	2.86063	0.000308287
GO:0005791	rough endoplasmic reticulum	15	2.73262	0.000321328
GO:0086010	membrane depolarization during action potential	6	5.67018	0.000372218
GO:0097028	dendritic cell differentiation	6	5.67018	0.000372218
GO:1990266	neutrophil migration	6	5.67018	0.000372218
GO:0006939	smooth muscle contraction	7	4.81107	0.000384587
GO:0048167	regulation of synaptic plasticity	13	2.93383	0.000387105
GO:0007156	homophilic cell adhesion via plasma membrane adhesion molecules	22	2.20299	0.000391418
GO:0019221	cytokine-mediated signaling pathway	22	2.20299	0.000391418
GO:0050853	B cell receptor signaling pathway	10	3.51639	0.00039738
GO:0005520	insulin-like growth factor binding	5	6.87295	0.000414284
GO:0042383	sarcolemma	20	2.29098	0.000421928
GO:0006836	neurotransmitter transport	9	3.78012	0.000434752
GO:0019934	cGMP-mediated signaling	8	4.17117	0.000439442
GO:0032703	negative regulation of interleukin-2 production	8	4.17117	0.000439442
GO:0001890	placenta development	12	3.0241	0.000480853
GO:0007399	nervous system development	35	1.81239	0.000481347
GO:0007613	memory	18	2.38745	0.000484662
GO:0030199	collagen fibril organization	11	3.19857	0.000495552
GO:0051930	regulation of sensory perception of pain	11	3.19857	0.000495552
GO:0050766	positive regulation of phagocytosis	13	2.84879	0.000521455
GO:0050901	leukocyte tethering or rolling	7	4.60189	0.000521481
GO:0015459	potassium channel regulator activity	9	3.67796	0.000541128
GO:0030425	dendrite	62	1.53181	0.000542061
GO:0004115	3',5'-cyclic-AMP phosphodiesterase activity	6	5.33664	0.000543181
GO:0007263	nitric oxide mediated signal transduction	6	5.33664	0.000543181
GO:0045651	positive regulation of macrophage differentiation	6	5.33664	0.000543181
GO:0061036	positive regulation of cartilage development	6	5.33664	0.000543181
GO:0003158	endothelium development	4	8.64028	0.000567003
GO:0010573	vascular endothelial growth factor production	4	8.64028	0.000567003
GO:0015189	L-lysine transmembrane transporter activity	4	8.64028	0.000567003
GO:0015213	uridine transmembrane transporter activity	4	8.64028	0.000567003
GO:0015862	uridine transport	4	8.64028	0.000567003
GO:0036006	cellular response to macrophage colony-stimulating factor stimulus	4	8.64028	0.000567003
GO:0070891	lipoteichoic acid binding	4	8.64028	0.000567003
GO:0072531	pyrimidine-containing compound transmembrane transport	4	8.64028	0.000567003
GO:0080135	regulation of cellular response to stress	4	8.64028	0.000567003
GO:1901642	nucleoside transmembrane transport	4	8.64028	0.000567003
GO:1903980	positive regulation of microglial cell activation	4	8.64028	0.000567003
GO:0042803	protein homodimerization activity	74	1.46839	0.000573301
GO:0007204	positive regulation of cytosolic calcium ion concentration	24	2.05024	0.000638476
GO:0046982	protein heterodimerization activity	39	1.72427	0.000640176
GO:0044877	protein-containing complex binding	66	1.49843	0.000658441
GO:0032743	positive regulation of interleukin-2 production	9	3.58117	0.000667916
GO:0045236	CXCR chemokine receptor binding	5	6.3002	0.000671582
GO:0048333	mesodermal cell differentiation	5	6.3002	0.000671582
GO:0048286	lung alveolus development	11	3.0801	0.000695459
GO:0045671	negative regulation of osteoclast differentiation	10	3.28706	0.000704964
GO:0071407	cellular response to organic cyclic compound	17	2.38008	0.000712438
GO:0006865	amino acid transport	6	5.04016	0.000769417
GO:0070528	protein kinase C signaling	6	5.04016	0.000769417
GO:0045669	positive regulation of osteoblast differentiation	13	2.73009	0.000795652
GO:0007411	axon guidance	24	2.01607	0.000813377
GO:0007584	response to nutrient	19	2.22705	0.000828269
GO:0007565	female pregnancy	22	2.07907	0.000871815
GO:0071944	cell periphery	15	2.49239	0.000882083
GO:0006898	receptor-mediated endocytosis	12	2.83509	0.000883838
GO:0043395	heparan sulfate proteoglycan binding	7	4.23374	0.000909975
GO:0044306	neuron projection terminus	7	4.23374	0.000909975
GO:0004888	transmembrane signaling receptor activity	19	2.20992	0.000911159
GO:0000165	MAPK cascade	17	2.31575	0.000977956
GO:0016485	protein processing	15	2.4653	0.000990692
GO:0044297	cell body	18	2.24933	0.000997121
GO:1904646	cellular response to amyloid-beta	10	3.1501	0.00100278
GO:0045944	positive regulation of transcription by RNA polymerase II	109	1.33995	0.00100556
GO:0008035	high-density lipoprotein particle binding	5	5.81557	0.00103208
GO:0043020	NADPH oxidase complex	5	5.81557	0.00103208
GO:0051764	actin crosslink formation	5	5.81557	0.00103208
GO:1903826	L-arginine transmembrane transport	5	5.81557	0.00103208
GO:2001223	negative regulation of neuron migration	5	5.81557	0.00103208
GO:0030426	growth cone	25	1.94852	0.00105496
GO:1903428	positive regulation of reactive oxygen species biosynthetic process	6	4.77489	0.00106202
GO:0001554	luteolysis	4	7.56025	0.00107458
GO:0031622	positive regulation of fever generation	4	7.56025	0.00107458
GO:0031995	insulin-like growth factor II binding	4	7.56025	0.00107458
GO:0034162	toll-like receptor 9 signaling pathway	4	7.56025	0.00107458
GO:0050861	positive regulation of B cell receptor signaling pathway	4	7.56025	0.00107458
GO:0060426	lung vasculature development	4	7.56025	0.00107458
GO:0061518	microglial cell proliferation	4	7.56025	0.00107458
GO:0005179	hormone activity	17	2.29507	0.00108337
GO:0042531	positive regulation of tyrosine phosphorylation of STAT protein	11	2.91799	0.00111749
GO:0044849	estrous cycle	8	3.66557	0.00112223
GO:0030225	macrophage differentiation	7	4.0709	0.00117483
GO:0032753	positive regulation of interleukin-4 production	7	4.0709	0.00117483
GO:0050431	transforming growth factor beta binding	7	4.0709	0.00117483
GO:0005044	scavenger receptor activity	10	3.08581	0.00118634
GO:0006911	phagocytosis, engulfment	9	3.31913	0.00120015
GO:0009888	tissue development	9	3.31913	0.00120015
GO:0048514	blood vessel morphogenesis	9	3.31913	0.00120015
GO:0043065	positive regulation of apoptotic process	41	1.6444	0.00120419
GO:0007507	heart development	34	1.73097	0.00128807
GO:0007623	circadian rhythm	17	2.25481	0.00132334
GO:0006915	apoptotic process	56	1.51205	0.00132642
GO:0043066	negative regulation of apoptotic process	58	1.49913	0.00134353
GO:0004713	protein tyrosine kinase activity	15	2.38745	0.00138653
GO:0014911	positive regulation of smooth muscle cell migration	10	3.0241	0.0013964
GO:0008285	negative regulation of cell population proliferation	45	1.58977	0.00142817
GO:0005922	connexin complex	6	4.53615	0.00143296
GO:0035584	calcium-mediated signaling using intracellular calcium source	6	4.53615	0.00143296
GO:0042310	vasoconstriction	6	4.53615	0.00143296
GO:0042554	superoxide anion generation	6	4.53615	0.00143296
GO:0060307	regulation of ventricular cardiac muscle cell membrane repolarization	6	4.53615	0.00143296
GO:0048469	cell maturation	9	3.24011	0.00143911
GO:0001780	neutrophil homeostasis	5	5.40018	0.00151847
GO:0010629	negative regulation of gene expression	36	1.68526	0.00151863
GO:0009314	response to radiation	10	2.9648	0.00163572
GO:0030099	myeloid cell differentiation	8	3.45611	0.00169088
GO:0098688	parallel fiber to Purkinje cell synapse	8	3.45611	0.00169088
GO:0042734	presynaptic membrane	23	1.94286	0.00170258
GO:0042288	MHC class I protein binding	9	3.16475	0.00171486
GO:0048306	calcium-dependent protein binding	15	2.33822	0.00171807
GO:0007189	adenylate cyclase-activating G protein-coupled receptor signaling pathway	18	2.14306	0.00175074
GO:0043627	response to estrogen	16	2.26101	0.0017579
GO:0005031	tumor necrosis factor receptor activity	4	6.72022	0.00183314
GO:0005337	nucleoside transmembrane transporter activity	4	6.72022	0.00183314
GO:0006048	UDP-N-acetylglucosamine biosynthetic process	4	6.72022	0.00183314
GO:0034351	negative regulation of glial cell apoptotic process	4	6.72022	0.00183314
GO:0045124	regulation of bone resorption	4	6.72022	0.00183314
GO:0060075	regulation of resting membrane potential	4	6.72022	0.00183314
GO:0060371	regulation of atrial cardiac muscle cell membrane depolarization	4	6.72022	0.00183314
GO:0061042	vascular wound healing	4	6.72022	0.00183314
GO:0071377	cellular response to glucagon stimulus	4	6.72022	0.00183314
GO:0071474	cellular hyperosmotic response	4	6.72022	0.00183314
GO:0086011	membrane repolarization during action potential	4	6.72022	0.00183314
GO:0150094	amyloid-beta clearance by cellular catabolic process	4	6.72022	0.00183314
GO:0042127	regulation of cell population proliferation	24	1.89996	0.00185675
GO:0002437	inflammatory response to antigenic stimulus	7	3.78012	0.00188272
GO:0004114	3',5'-cyclic-nucleotide phosphodiesterase activity	6	4.32014	0.00189494
GO:0010226	response to lithium ion	6	4.32014	0.00189494
GO:0031103	axon regeneration	6	4.32014	0.00189494
GO:0032693	negative regulation of interleukin-10 production	6	4.32014	0.00189494
GO:0045778	positive regulation of ossification	6	4.32014	0.00189494
GO:0071236	cellular response to antibiotic	6	4.32014	0.00189494
GO:1900006	positive regulation of dendrite development	6	4.32014	0.00189494
GO:0001974	blood vessel remodeling	10	2.90779	0.00190718
GO:1902895	positive regulation of miRNA transcription	10	2.90779	0.00190718
GO:0038023	signaling receptor activity	20	2.0296	0.00196307
GO:0045785	positive regulation of cell adhesion	12	2.59208	0.00198648
GO:0003151	outflow tract morphogenesis	11	2.72665	0.00198779
GO:0034394	protein localization to cell surface	9	3.09283	0.00203134
GO:0000902	cell morphogenesis	15	2.29098	0.00211331
GO:0006518	peptide metabolic process	5	5.04016	0.00215451
GO:0021819	layer formation in cerebral cortex	5	5.04016	0.00215451
GO:0071371	cellular response to gonadotropin stimulus	5	5.04016	0.00215451
GO:0097623	potassium ion export across plasma membrane	5	5.04016	0.00215451
GO:1990416	cellular response to brain-derived neurotrophic factor stimulus	5	5.04016	0.00215451
GO:0000987	cis-regulatory region sequence-specific DNA binding	13	2.45708	0.00216636
GO:0030324	lung development	19	2.05207	0.0022109
GO:0006749	glutathione metabolic process	10	2.85292	0.00221386
GO:0045907	positive regulation of vasoconstriction	10	2.85292	0.00221386
GO:0045471	response to ethanol	26	1.82006	0.00227383
GO:0045892	negative regulation of DNA-templated transcription	60	1.45389	0.00229425
GO:0021987	cerebral cortex development	15	2.26807	0.00233761
GO:0071333	cellular response to glucose stimulus	15	2.26807	0.00233761
GO:0046697	decidualization	8	3.2693	0.00246595
GO:0090090	negative regulation of canonical Wnt signaling pathway	18	2.07762	0.00248347
GO:0031667	response to nutrient levels	20	1.98954	0.002492
GO:0006805	xenobiotic metabolic process	15	2.24562	0.00258128
GO:0032587	ruffle membrane	15	2.24562	0.00258128
GO:0006874	cellular calcium ion homeostasis	16	2.17953	0.00258191
GO:0002248	connective tissue replacement involved in inflammatory response wound healing	3	9.07229	0.00260858
GO:0004957	prostaglandin E receptor activity	3	9.07229	0.00260858
GO:0005415	nucleoside:sodium symporter activity	3	9.07229	0.00260858
GO:0010574	regulation of vascular endothelial growth factor production	3	9.07229	0.00260858
GO:0014829	vascular associated smooth muscle contraction	3	9.07229	0.00260858
GO:0015389	pyrimidine- and adenine-specific:sodium symporter activity	3	9.07229	0.00260858
GO:0016462	pyrophosphatase activity	3	9.07229	0.00260858
GO:0034123	positive regulation of toll-like receptor signaling pathway	3	9.07229	0.00260858
GO:0034189	very-low-density lipoprotein particle binding	3	9.07229	0.00260858
GO:0034381	plasma lipoprotein particle clearance	3	9.07229	0.00260858
GO:0035754	B cell chemotaxis	3	9.07229	0.00260858
GO:0045601	regulation of endothelial cell differentiation	3	9.07229	0.00260858
GO:0046069	cGMP catabolic process	3	9.07229	0.00260858
GO:0046882	negative regulation of follicle-stimulating hormone secretion	3	9.07229	0.00260858
GO:0048403	brain-derived neurotrophic factor binding	3	9.07229	0.00260858
GO:0048861	leukemia inhibitory factor signaling pathway	3	9.07229	0.00260858
GO:0070665	positive regulation of leukocyte proliferation	3	9.07229	0.00260858
GO:0071226	cellular response to molecule of fungal origin	3	9.07229	0.00260858
GO:0071502	cellular response to temperature stimulus	3	9.07229	0.00260858
GO:0071726	cellular response to diacyl bacterial lipopeptide	3	9.07229	0.00260858
GO:0090131	mesenchyme migration	3	9.07229	0.00260858
GO:0140206	dipeptide import across plasma membrane	3	9.07229	0.00260858
GO:1903039	positive regulation of leukocyte cell-cell adhesion	3	9.07229	0.00260858
GO:1990822	basic amino acid transmembrane transport	3	9.07229	0.00260858
GO:0007165	signal transduction	71	1.39786	0.0026465
GO:0005911	cell-cell junction	27	1.77501	0.00271093
GO:0018108	peptidyl-tyrosine phosphorylation	13	2.39715	0.00271404
GO:0071320	cellular response to cAMP	13	2.39715	0.00271404
GO:0001819	positive regulation of cytokine production	17	2.10695	0.00278068
GO:0032735	positive regulation of interleukin-12 production	9	2.95836	0.0028032
GO:0044305	calyx of Held	7	3.52811	0.00288281
GO:0009624	response to nematode	4	6.0482	0.0028959
GO:0032432	actin filament bundle	4	6.0482	0.0028959
GO:0033089	positive regulation of T cell differentiation in thymus	4	6.0482	0.0028959
GO:0046850	regulation of bone remodeling	4	6.0482	0.0028959
GO:0048048	embryonic eye morphogenesis	4	6.0482	0.0028959
GO:0061384	heart trabecula morphogenesis	4	6.0482	0.0028959
GO:2000391	positive regulation of neutrophil extravasation	4	6.0482	0.0028959
GO:0002548	monocyte chemotaxis	8	3.18326	0.00294542
GO:0005244	voltage-gated ion channel activity	8	3.18326	0.00294542
GO:0002062	chondrocyte differentiation	11	2.59883	0.00294967
GO:0001886	endothelial cell morphogenesis	5	4.72515	0.00296464
GO:0002720	positive regulation of cytokine production involved in immune response	5	4.72515	0.00296464
GO:0030297	transmembrane receptor protein tyrosine kinase activator activity	5	4.72515	0.00296464
GO:0032233	positive regulation of actin filament bundle assembly	5	4.72515	0.00296464
GO:0043279	response to alkaloid	5	4.72515	0.00296464
GO:0140537	transcription regulator activator activity	5	4.72515	0.00296464
GO:1901381	positive regulation of potassium ion transmembrane transport	5	4.72515	0.00296464
GO:0032279	asymmetric synapse	6	3.94448	0.00314597
GO:0038024	cargo receptor activity	6	3.94448	0.00314597
GO:0043011	myeloid dendritic cell differentiation	6	3.94448	0.00314597
GO:2000249	regulation of actin cytoskeleton reorganization	6	3.94448	0.00314597
GO:2001222	regulation of neuron migration	6	3.94448	0.00314597
GO:0016328	lateral plasma membrane	12	2.45197	0.00321357
GO:0021510	spinal cord development	9	2.89541	0.00326742
GO:0031090	organelle membrane	9	2.89541	0.00326742
GO:0071310	cellular response to organic substance	9	2.89541	0.00326742
GO:0120163	negative regulation of cold-induced thermogenesis	9	2.89541	0.00326742
GO:0051091	positive regulation of DNA-binding transcription factor activity	17	2.07297	0.00330332
GO:0006879	cellular iron ion homeostasis	11	2.55885	0.0033428
GO:0031526	brush border membrane	14	2.25199	0.00343947
GO:0035725	sodium ion transmembrane transport	14	2.25199	0.00343947
GO:0045444	fat cell differentiation	15	2.18084	0.00344119
GO:2000379	positive regulation of reactive oxygen species metabolic process	8	3.10164	0.00349445
GO:0071230	cellular response to amino acid stimulus	11	2.52008	0.00377682
GO:0019228	neuronal action potential	9	2.83509	0.00379003
GO:0045177	apical part of cell	17	2.04007	0.00390469
GO:0042995	cell projection	22	1.84806	0.00394511
GO:0010996	response to auditory stimulus	6	3.78012	0.00396313
GO:0042573	retinoic acid metabolic process	6	3.78012	0.00396313
GO:0046579	positive regulation of Ras protein signal transduction	6	3.78012	0.00396313
GO:0050872	white fat cell differentiation	6	3.78012	0.00396313
GO:0060707	trophoblast giant cell differentiation	6	3.78012	0.00396313
GO:0090190	positive regulation of branching involved in ureteric bud morphogenesis	6	3.78012	0.00396313
GO:0001518	voltage-gated sodium channel complex	5	4.4472	0.00397358
GO:0001972	retinoic acid binding	5	4.4472	0.00397358
GO:0015643	toxic substance binding	5	4.4472	0.00397358
GO:0030101	natural killer cell activation	5	4.4472	0.00397358
GO:0030169	low-density lipoprotein particle binding	5	4.4472	0.00397358
GO:0005267	potassium channel activity	8	3.0241	0.0041195
GO:0044853	plasma membrane raft	8	3.0241	0.0041195
GO:0007015	actin filament organization	19	1.94114	0.00414912
GO:0005096	GTPase activator activity	30	1.6677	0.00417022
GO:0043679	axon terminus	14	2.20507	0.00417835
GO:0021983	pituitary gland development	7	3.30761	0.00424585
GO:0000050	urea cycle	4	5.49836	0.00431397
GO:0001217	DNA-binding transcription repressor activity	4	5.49836	0.00431397
GO:0001504	neurotransmitter uptake	4	5.49836	0.00431397
GO:0014074	response to purine-containing compound	4	5.49836	0.00431397
GO:0016918	retinal binding	4	5.49836	0.00431397
GO:0030212	hyaluronan metabolic process	4	5.49836	0.00431397
GO:0045588	positive regulation of gamma-delta T cell differentiation	4	5.49836	0.00431397
GO:0071447	cellular response to hydroperoxide	4	5.49836	0.00431397
GO:0072678	T cell migration	4	5.49836	0.00431397
GO:0034446	substrate adhesion-dependent cell spreading	10	2.60698	0.00439234
GO:0032720	negative regulation of tumor necrosis factor production	12	2.35644	0.00448701
GO:0097110	scaffold protein binding	13	2.25938	0.00458977
GO:0048471	perinuclear region of cytoplasm	75	1.35327	0.00461682
GO:0031663	lipopolysaccharide-mediated signaling pathway	8	2.95034	0.00482722
GO:0051092	positive regulation of NF-kappaB transcription factor activity	20	1.87832	0.00484474
GO:0000302	response to reactive oxygen species	6	3.62892	0.00492728
GO:0002526	acute inflammatory response	6	3.62892	0.00492728
GO:0030500	regulation of bone mineralization	6	3.62892	0.00492728
GO:0070160	tight junction	6	3.62892	0.00492728
GO:0006828	manganese ion transport	3	7.56025	0.00496069
GO:0008228	opsonization	3	7.56025	0.00496069
GO:0015911	long-chain fatty acid import across plasma membrane	3	7.56025	0.00496069
GO:0031726	CCR1 chemokine receptor binding	3	7.56025	0.00496069
GO:0032328	alanine transport	3	7.56025	0.00496069
GO:0035723	interleukin-15-mediated signaling pathway	3	7.56025	0.00496069
GO:0043125	ErbB-3 class receptor binding	3	7.56025	0.00496069
GO:0043551	regulation of phosphatidylinositol 3-kinase activity	3	7.56025	0.00496069
GO:0048014	Tie signaling pathway	3	7.56025	0.00496069
GO:0050779	RNA destabilization	3	7.56025	0.00496069
GO:0050999	regulation of nitric-oxide synthase activity	3	7.56025	0.00496069
GO:0070493	thrombin-activated receptor signaling pathway	3	7.56025	0.00496069
GO:0071221	cellular response to bacterial lipopeptide	3	7.56025	0.00496069
GO:0090024	negative regulation of neutrophil chemotaxis	3	7.56025	0.00496069
GO:0120041	positive regulation of macrophage proliferation	3	7.56025	0.00496069
GO:1900086	positive regulation of peptidyl-tyrosine autophosphorylation	3	7.56025	0.00496069
GO:1903169	regulation of calcium ion transmembrane transport	3	7.56025	0.00496069
GO:1903862	positive regulation of oxidative phosphorylation	3	7.56025	0.00496069
GO:1990817	RNA adenylyltransferase activity	3	7.56025	0.00496069
GO:2000427	positive regulation of apoptotic cell clearance	3	7.56025	0.00496069
GO:0050714	positive regulation of protein secretion	10	2.5628	0.00498226
GO:0034097	response to cytokine	14	2.16007	0.00504103
GO:0000776	kinetochore	19	1.90258	0.00516862
GO:0001895	retina homeostasis	5	4.20014	0.00520596
GO:0006541	glutamine metabolic process	5	4.20014	0.00520596
GO:0034185	apolipoprotein binding	5	4.20014	0.00520596
GO:0061053	somite development	5	4.20014	0.00520596
GO:0071294	cellular response to zinc ion	5	4.20014	0.00520596
GO:0071498	cellular response to fluid shear stress	5	4.20014	0.00520596
GO:0031234	extrinsic component of cytoplasmic side of plasma membrane	11	2.41051	0.0053541
GO:0051897	positive regulation of protein kinase B signaling	17	1.97729	0.00537858
GO:0021766	hippocampus development	15	2.0808	0.00538688
GO:0001569	branching involved in blood vessel morphogenesis	8	2.88009	0.00562442
GO:0071548	response to dexamethasone	8	2.88009	0.00562442
GO:0098742	cell-cell adhesion via plasma-membrane adhesion molecules	8	2.88009	0.00562442
GO:1990573	potassium ion import across plasma membrane	8	2.88009	0.00562442
GO:0008237	metallopeptidase activity	10	2.52008	0.00563253
GO:0098686	hippocampal mossy fiber to CA3 synapse	10	2.52008	0.00563253
GO:0006693	prostaglandin metabolic process	7	3.11304	0.00604694
GO:0015908	fatty acid transport	7	3.11304	0.00604694
GO:0014009	glial cell proliferation	6	3.48934	0.00605301
GO:0005890	sodium:potassium-exchanging ATPase complex	4	5.04016	0.00613517
GO:0010572	positive regulation of platelet activation	4	5.04016	0.00613517
GO:0015250	water channel activity	4	5.04016	0.00613517
GO:0030510	regulation of BMP signaling pathway	4	5.04016	0.00613517
GO:0032308	positive regulation of prostaglandin secretion	4	5.04016	0.00613517
GO:0048251	elastic fiber assembly	4	5.04016	0.00613517
GO:0048407	platelet-derived growth factor binding	4	5.04016	0.00613517
GO:0071875	adrenergic receptor signaling pathway	4	5.04016	0.00613517
GO:0140052	cellular response to oxidised low-density lipoprotein particle stimulus	4	5.04016	0.00613517
GO:1901224	positive regulation of NIK/NF-kappaB signaling	12	2.26807	0.00613525
GO:0030175	filopodium	13	2.18407	0.00614189
GO:0005516	calmodulin binding	24	1.72806	0.00630401
GO:0008283	cell population proliferation	35	1.55652	0.0063069
GO:0007266	Rho protein signal transduction	10	2.47877	0.00634719
GO:0001755	neural crest cell migration	9	2.61701	0.00656303
GO:0071345	cellular response to cytokine stimulus	9	2.61701	0.00656303
GO:0098655	cation transmembrane transport	9	2.61701	0.00656303
GO:0098793	presynapse	30	1.61429	0.00661689
GO:0004653	polypeptide N-acetylgalactosaminyltransferase activity	5	3.97908	0.00668593
GO:0008610	lipid biosynthetic process	5	3.97908	0.00668593
GO:0019829	ATPase-coupled cation transmembrane transporter activity	5	3.97908	0.00668593
GO:0030111	regulation of Wnt signaling pathway	5	3.97908	0.00668593
GO:0042308	negative regulation of protein import into nucleus	5	3.97908	0.00668593
GO:0045725	positive regulation of glycogen biosynthetic process	5	3.97908	0.00668593
GO:0060749	mammary gland alveolus development	5	3.97908	0.00668593
GO:0098831	presynaptic active zone cytoplasmic component	5	3.97908	0.00668593
GO:0031982	vesicle	21	1.79396	0.00671769
GO:0007420	brain development	37	1.52857	0.00677873
GO:0030334	regulation of cell migration	17	1.91827	0.007277
GO:0035987	endodermal cell differentiation	6	3.36011	0.00735489
GO:0043086	negative regulation of catalytic activity	6	3.36011	0.00735489
GO:0045104	intermediate filament cytoskeleton organization	6	3.36011	0.00735489
GO:0048535	lymph node development	6	3.36011	0.00735489
GO:0009925	basal plasma membrane	11	2.31007	0.00741027
GO:0042542	response to hydrogen peroxide	11	2.31007	0.00741027
GO:0007188	adenylate cyclase-modulating G protein-coupled receptor signaling pathway	9	2.56763	0.00745263
GO:0030155	regulation of cell adhesion	9	2.56763	0.00745263
GO:0032722	positive regulation of chemokine production	9	2.56763	0.00745263
GO:0007626	locomotory behavior	15	2.00714	0.00751385
GO:0070555	response to interleukin-1	8	2.74918	0.00751508
GO:1900026	positive regulation of substrate adhesion-dependent cell spreading	8	2.74918	0.00751508
GO:0010976	positive regulation of neuron projection development	20	1.80006	0.00774186
GO:0033138	positive regulation of peptidyl-serine phosphorylation	14	2.05521	0.00783508
GO:0031410	cytoplasmic vesicle	38	1.50413	0.00791717
GO:0019233	sensory perception of pain	12	2.1861	0.00822913
GO:0032729	positive regulation of type II interferon production	12	2.1861	0.00822913
GO:0003229	ventricular cardiac muscle tissue development	3	6.48021	0.00825596
GO:0003357	noradrenergic neuron differentiation	3	6.48021	0.00825596
GO:0003402	planar cell polarity pathway involved in axis elongation	3	6.48021	0.00825596
GO:0004112	cyclic-nucleotide phosphodiesterase activity	3	6.48021	0.00825596
GO:0006047	UDP-N-acetylglucosamine metabolic process	3	6.48021	0.00825596
GO:0015174	basic amino acid transmembrane transporter activity	3	6.48021	0.00825596
GO:0015793	glycerol transmembrane transport	3	6.48021	0.00825596
GO:0021782	glial cell development	3	6.48021	0.00825596
GO:0021978	telencephalon regionalization	3	6.48021	0.00825596
GO:0030072	peptide hormone secretion	3	6.48021	0.00825596
GO:0032229	negative regulation of synaptic transmission, GABAergic	3	6.48021	0.00825596
GO:0032488	Cdc42 protein signal transduction	3	6.48021	0.00825596
GO:0033004	negative regulation of mast cell activation	3	6.48021	0.00825596
GO:0034121	regulation of toll-like receptor signaling pathway	3	6.48021	0.00825596
GO:0038026	reelin-mediated signaling pathway	3	6.48021	0.00825596
GO:0042045	epithelial fluid transport	3	6.48021	0.00825596
GO:0043305	negative regulation of mast cell degranulation	3	6.48021	0.00825596
GO:0043372	positive regulation of CD4-positive, alpha-beta T cell differentiation	3	6.48021	0.00825596
GO:0043426	MRF binding	3	6.48021	0.00825596
GO:0050856	regulation of T cell receptor signaling pathway	3	6.48021	0.00825596
GO:0051005	negative regulation of lipoprotein lipase activity	3	6.48021	0.00825596
GO:0051771	negative regulation of nitric-oxide synthase biosynthetic process	3	6.48021	0.00825596
GO:0060028	convergent extension involved in axis elongation	3	6.48021	0.00825596
GO:0060754	positive regulation of mast cell chemotaxis	3	6.48021	0.00825596
GO:0086015	SA node cell action potential	3	6.48021	0.00825596
GO:0098810	neurotransmitter reuptake	3	6.48021	0.00825596
GO:0099525	presynaptic dense core vesicle exocytosis	3	6.48021	0.00825596
GO:0099538	synaptic signaling via neuropeptide	3	6.48021	0.00825596
GO:1904568	cellular response to wortmannin	3	6.48021	0.00825596
GO:1905563	negative regulation of vascular endothelial cell proliferation	3	6.48021	0.00825596
GO:1990349	gap junction-mediated intercellular transport	3	6.48021	0.00825596
GO:1990379	lipid transport across blood-brain barrier	3	6.48021	0.00825596
GO:2001236	regulation of extrinsic apoptotic signaling pathway	3	6.48021	0.00825596
GO:0007631	feeding behavior	7	2.9401	0.00836365
GO:0055007	cardiac muscle cell differentiation	7	2.9401	0.00836365
GO:0060907	positive regulation of macrophage cytokine production	7	2.9401	0.00836365
GO:0086091	regulation of heart rate by cardiac conduction	7	2.9401	0.00836365
GO:0061629	RNA polymerase II-specific DNA-binding transcription factor binding	22	1.73256	0.00840312
GO:0016486	peptide hormone processing	4	4.65246	0.00840321
GO:0030247	polysaccharide binding	4	4.65246	0.00840321
GO:0043589	skin morphogenesis	4	4.65246	0.00840321
GO:0045741	positive regulation of epidermal growth factor-activated receptor activity	4	4.65246	0.00840321
GO:0045926	negative regulation of growth	4	4.65246	0.00840321
GO:0060056	mammary gland involution	4	4.65246	0.00840321
GO:0061337	cardiac conduction	4	4.65246	0.00840321
GO:1990776	response to angiotensin	4	4.65246	0.00840321
GO:2000177	regulation of neural precursor cell proliferation	4	4.65246	0.00840321
GO:0030178	negative regulation of Wnt signaling pathway	9	2.52008	0.00843137
GO:0002523	leukocyte migration involved in inflammatory response	5	3.78012	0.00843692
GO:0003197	endocardial cushion development	5	3.78012	0.00843692
GO:0005326	neurotransmitter transmembrane transporter activity	5	3.78012	0.00843692
GO:0036122	BMP binding	5	3.78012	0.00843692
GO:0044342	type B pancreatic cell proliferation	5	3.78012	0.00843692
GO:0090280	positive regulation of calcium ion import	5	3.78012	0.00843692
GO:0097386	glial cell projection	5	3.78012	0.00843692
GO:0009725	response to hormone	14	2.03545	0.00851857
GO:0042476	odontogenesis	8	2.68809	0.00862262
GO:0048786	presynaptic active zone	8	2.68809	0.00862262
GO:0060076	excitatory synapse	8	2.68809	0.00862262
GO:0071385	cellular response to glucocorticoid stimulus	8	2.68809	0.00862262
GO:0042593	glucose homeostasis	20	1.77888	0.00878828
GO:0006883	cellular sodium ion homeostasis	6	3.24011	0.0088473
GO:0015026	coreceptor activity	6	3.24011	0.0088473
GO:0048708	astrocyte differentiation	6	3.24011	0.0088473
GO:0071361	cellular response to ethanol	6	3.24011	0.0088473
GO:0035914	skeletal muscle cell differentiation	9	2.47426	0.00950463
GO:0098586	cellular response to virus	9	2.47426	0.00950463
GO:0000132	establishment of mitotic spindle orientation	7	2.86063	0.00973978
GO:0004364	glutathione transferase activity	7	2.86063	0.00973978
GO:0019838	growth factor binding	7	2.86063	0.00973978
GO:0071398	cellular response to fatty acid	7	2.86063	0.00973978
GO:0030574	collagen catabolic process	8	2.62965	0.00984776
GO:0030315	T-tubule	10	2.32623	0.00993262
GO:0002063	chondrocyte development	5	3.60012	0.0104813
GO:0005324	long-chain fatty acid transporter activity	5	3.60012	0.0104813
GO:0015171	amino acid transmembrane transporter activity	5	3.60012	0.0104813
GO:0042908	xenobiotic transport	5	3.60012	0.0104813
GO:0019722	calcium-mediated signaling	13	2.04757	0.0104835
GO:0002092	positive regulation of receptor internalization	6	3.12838	0.0105443
GO:0016342	catenin complex	6	3.12838	0.0105443
GO:0048714	positive regulation of oligodendrocyte differentiation	6	3.12838	0.0105443
GO:0048738	cardiac muscle tissue development	6	3.12838	0.0105443
GO:0099523	presynaptic cytosol	6	3.12838	0.0105443
GO:1900273	positive regulation of long-term synaptic potentiation	6	3.12838	0.0105443
GO:0006936	muscle contraction	9	2.43008	0.0106778
GO:0009409	response to cold	9	2.43008	0.0106778
GO:0046677	response to antibiotic	9	2.43008	0.0106778
GO:0043588	skin development	10	2.29098	0.0110319
GO:0004222	metalloendopeptidase activity	16	1.87541	0.011134
GO:0003084	positive regulation of systemic arterial blood pressure	4	4.32014	0.0111571
GO:0006739	NADP metabolic process	4	4.32014	0.0111571
GO:0008191	metalloendopeptidase inhibitor activity	4	4.32014	0.0111571
GO:0031748	D1 dopamine receptor binding	4	4.32014	0.0111571
GO:0035815	positive regulation of renal sodium excretion	4	4.32014	0.0111571
GO:0044794	positive regulation by host of viral process	4	4.32014	0.0111571
GO:0051310	metaphase plate congression	4	4.32014	0.0111571
GO:0085029	extracellular matrix assembly	4	4.32014	0.0111571
GO:0089718	amino acid import across plasma membrane	4	4.32014	0.0111571
GO:0098797	plasma membrane protein complex	4	4.32014	0.0111571
GO:1904862	inhibitory synapse assembly	4	4.32014	0.0111571
GO:0048813	dendrite morphogenesis	8	2.5737	0.0111976
GO:0050769	positive regulation of neurogenesis	8	2.5737	0.0111976
GO:0043231	intracellular membrane-bounded organelle	70	1.31483	0.0114456
GO:0022008	neurogenesis	12	2.08558	0.0118443
GO:0001889	liver development	17	1.82304	0.0118698
GO:0048545	response to steroid hormone	9	2.38745	0.0119564
GO:0097440	apical dendrite	6	3.0241	0.0124597
GO:1901363	heterocyclic compound binding	6	3.0241	0.0124597
GO:0001936	regulation of endothelial cell proliferation	3	5.67018	0.0125648
GO:0008429	phosphatidylethanolamine binding	3	5.67018	0.0125648
GO:0010827	regulation of glucose transmembrane transport	3	5.67018	0.0125648
GO:0010886	positive regulation of cholesterol storage	3	5.67018	0.0125648
GO:0016264	gap junction assembly	3	5.67018	0.0125648
GO:0030135	coated vesicle	3	5.67018	0.0125648
GO:0031730	CCR5 chemokine receptor binding	3	5.67018	0.0125648
GO:0032396	inhibitory MHC class I receptor activity	3	5.67018	0.0125648
GO:0032815	negative regulation of natural killer cell activation	3	5.67018	0.0125648
GO:0042634	regulation of hair cycle	3	5.67018	0.0125648
GO:0043256	laminin complex	3	5.67018	0.0125648
GO:0045110	intermediate filament bundle assembly	3	5.67018	0.0125648
GO:0045986	negative regulation of smooth muscle contraction	3	5.67018	0.0125648
GO:0048639	positive regulation of developmental growth	3	5.67018	0.0125648
GO:0060054	positive regulation of epithelial cell proliferation involved in wound healing	3	5.67018	0.0125648
GO:0070482	response to oxygen levels	3	5.67018	0.0125648
GO:0071224	cellular response to peptidoglycan	3	5.67018	0.0125648
GO:0071321	cellular response to cGMP	3	5.67018	0.0125648
GO:0072540	T-helper 17 cell lineage commitment	3	5.67018	0.0125648
GO:0098868	bone growth	3	5.67018	0.0125648
GO:0098915	membrane repolarization during ventricular cardiac muscle cell action potential	3	5.67018	0.0125648
GO:0106072	negative regulation of adenylate cyclase-activating G protein-coupled receptor signaling pathway	3	5.67018	0.0125648
GO:0001657	ureteric bud development	8	2.52008	0.0126791
GO:0001764	neuron migration	17	1.8102	0.01268
GO:0043434	response to peptide hormone	16	1.84678	0.0127948
GO:0001508	action potential	5	3.43648	0.0128401
GO:0006910	phagocytosis, recognition	5	3.43648	0.0128401
GO:0031643	positive regulation of myelination	5	3.43648	0.0128401
GO:0043032	positive regulation of macrophage activation	5	3.43648	0.0128401
GO:0098974	postsynaptic actin cytoskeleton organization	5	3.43648	0.0128401
GO:0001656	metanephros development	7	2.71393	0.0129758
GO:0042755	eating behavior	7	2.71393	0.0129758
GO:0006909	phagocytosis	11	2.13238	0.0133208
GO:0030163	protein catabolic process	14	1.92443	0.0136639
GO:0005737	cytoplasm	442	1.09079	0.0137629
GO:0060348	bone development	12	2.03872	0.0140568
GO:0000940	outer kinetochore	4	4.03213	0.0144308
GO:0001542	ovulation from ovarian follicle	4	4.03213	0.0144308
GO:0003774	cytoskeletal motor activity	4	4.03213	0.0144308
GO:0005068	transmembrane receptor protein tyrosine kinase adaptor activity	4	4.03213	0.0144308
GO:0005149	interleukin-1 receptor binding	4	4.03213	0.0144308
GO:0007260	tyrosine phosphorylation of STAT protein	4	4.03213	0.0144308
GO:0010369	chromocenter	4	4.03213	0.0144308
GO:0017085	response to insecticide	4	4.03213	0.0144308
GO:0033591	response to L-ascorbic acid	4	4.03213	0.0144308
GO:0033690	positive regulation of osteoblast proliferation	4	4.03213	0.0144308
GO:0043117	positive regulation of vascular permeability	4	4.03213	0.0144308
GO:0045545	syndecan binding	4	4.03213	0.0144308
GO:0051014	actin filament severing	4	4.03213	0.0144308
GO:0097435	supramolecular fiber organization	4	4.03213	0.0144308
GO:0048812	neuron projection morphogenesis	11	2.10538	0.0145795
GO:0016540	protein autoprocessing	6	2.92655	0.0146066
GO:0016597	amino acid binding	6	2.92655	0.0146066
GO:0032691	negative regulation of interleukin-1 beta production	6	2.92655	0.0146066
GO:0036120	cellular response to platelet-derived growth factor stimulus	6	2.92655	0.0146066
GO:0045672	positive regulation of osteoclast differentiation	6	2.92655	0.0146066
GO:0048873	homeostasis of number of cells within a tissue	7	2.64609	0.0148544
GO:0043087	regulation of GTPase activity	12	2.01607	0.0152744
GO:0031954	positive regulation of protein autophosphorylation	5	3.28706	0.0155329
GO:0099509	regulation of presynaptic cytosolic calcium ion concentration	5	3.28706	0.0155329
GO:1901653	cellular response to peptide	5	3.28706	0.0155329
GO:0007010	cytoskeleton organization	14	1.89006	0.0158277
GO:0001658	branching involved in ureteric bud morphogenesis	8	2.41928	0.0160648
GO:0042098	T cell proliferation	10	2.16007	0.0163691
GO:0001942	hair follicle development	9	2.26807	0.016478
GO:0051412	response to corticosterone	7	2.58155	0.0169188
GO:0008199	ferric iron binding	6	2.83509	0.0169976
GO:0016339	calcium-dependent cell-cell adhesion via plasma membrane cell adhesion molecules	6	2.83509	0.0169976
GO:0030674	protein-macromolecule adaptor activity	14	1.87334	0.0170034
GO:0034765	regulation of ion transmembrane transport	14	1.87334	0.0170034
GO:0005102	signaling receptor binding	36	1.44387	0.0171901
GO:0002693	positive regulation of cellular extravasation	3	5.04016	0.0179306
GO:0004031	aldehyde oxidase activity	3	5.04016	0.0179306
GO:0004499	N,N-dimethylaniline monooxygenase activity	3	5.04016	0.0179306
GO:0005391	P-type sodium:potassium-exchanging transporter activity	3	5.04016	0.0179306
GO:0006198	cAMP catabolic process	3	5.04016	0.0179306
GO:0009992	cellular water homeostasis	3	5.04016	0.0179306
GO:0014037	Schwann cell differentiation	3	5.04016	0.0179306
GO:0014732	skeletal muscle atrophy	3	5.04016	0.0179306
GO:0015278	calcium-release channel activity	3	5.04016	0.0179306
GO:0015820	leucine transport	3	5.04016	0.0179306
GO:0016175	superoxide-generating NAD(P)H oxidase activity	3	5.04016	0.0179306
GO:0018243	protein O-linked glycosylation via threonine	3	5.04016	0.0179306
GO:0019864	IgG binding	3	5.04016	0.0179306
GO:0031394	positive regulation of prostaglandin biosynthetic process	3	5.04016	0.0179306
GO:0032494	response to peptidoglycan	3	5.04016	0.0179306
GO:0035325	Toll-like receptor binding	3	5.04016	0.0179306
GO:0043546	molybdopterin cofactor binding	3	5.04016	0.0179306
GO:0043567	regulation of insulin-like growth factor receptor signaling pathway	3	5.04016	0.0179306
GO:0043569	negative regulation of insulin-like growth factor receptor signaling pathway	3	5.04016	0.0179306
GO:0043615	astrocyte cell migration	3	5.04016	0.0179306
GO:0047822	hypotaurine dehydrogenase activity	3	5.04016	0.0179306
GO:0060087	relaxation of vascular associated smooth muscle	3	5.04016	0.0179306
GO:0060137	maternal process involved in parturition	3	5.04016	0.0179306
GO:0060306	regulation of membrane repolarization	3	5.04016	0.0179306
GO:0060373	regulation of ventricular cardiac muscle cell membrane depolarization	3	5.04016	0.0179306
GO:0061469	regulation of type B pancreatic cell proliferation	3	5.04016	0.0179306
GO:0072559	NLRP3 inflammasome complex	3	5.04016	0.0179306
GO:0090175	regulation of establishment of planar polarity	3	5.04016	0.0179306
GO:0097512	cardiac myofibril	3	5.04016	0.0179306
GO:0098976	excitatory chemical synaptic transmission	3	5.04016	0.0179306
GO:1900015	regulation of cytokine production involved in inflammatory response	3	5.04016	0.0179306
GO:1901687	glutathione derivative biosynthetic process	3	5.04016	0.0179306
GO:1902624	positive regulation of neutrophil migration	3	5.04016	0.0179306
GO:1903589	positive regulation of blood vessel endothelial cell proliferation involved in sprouting angiogenesis	3	5.04016	0.0179306
GO:0050679	positive regulation of epithelial cell proliferation	12	1.97224	0.0179473
GO:0002020	protease binding	18	1.71175	0.0179565
GO:0048666	neuron development	10	2.12965	0.0179597
GO:0042149	cellular response to glucose starvation	9	2.23089	0.0182314
GO:0002544	chronic inflammatory response	4	3.78012	0.0182528
GO:0005229	intracellular calcium activated chloride channel activity	4	3.78012	0.0182528
GO:0006833	water transport	4	3.78012	0.0182528
GO:0019725	cellular homeostasis	4	3.78012	0.0182528
GO:0031005	filamin binding	4	3.78012	0.0182528
GO:0033630	positive regulation of cell adhesion mediated by integrin	4	3.78012	0.0182528
GO:0043951	negative regulation of cAMP-mediated signaling	4	3.78012	0.0182528
GO:0048245	eosinophil chemotaxis	4	3.78012	0.0182528
GO:0050909	sensory perception of taste	4	3.78012	0.0182528
GO:0070700	BMP receptor binding	4	3.78012	0.0182528
GO:0005248	voltage-gated sodium channel activity	5	3.1501	0.0185776
GO:0005506	iron ion binding	21	1.62836	0.0188698
GO:0001664	G protein-coupled receptor binding	11	2.02836	0.0188944
GO:0004715	non-membrane spanning protein tyrosine kinase activity	7	2.52008	0.0191777
GO:0006493	protein O-linked glycosylation	7	2.52008	0.0191777
GO:0009968	negative regulation of signal transduction	7	2.52008	0.0191777
GO:0043278	response to morphine	7	2.52008	0.0191777
GO:0097192	extrinsic apoptotic signaling pathway in absence of ligand	7	2.52008	0.0191777
GO:1904706	negative regulation of vascular associated smooth muscle cell proliferation	6	2.74918	0.0196444
GO:0004497	monooxygenase activity	8	2.32623	0.0200588
GO:0070161	anchoring junction	8	2.32623	0.0200588
GO:0035094	response to nicotine	9	2.19491	0.0201164
GO:0048787	presynaptic active zone membrane	9	2.19491	0.0201164
GO:0014069	postsynaptic density	39	1.40405	0.0204245
GO:0004867	serine-type endopeptidase inhibitor activity	15	1.78588	0.0206183
GO:0005923	bicellular tight junction	16	1.74049	0.0214483
GO:0035019	somatic stem cell population maintenance	10	2.0713	0.0214777
GO:0070588	calcium ion transmembrane transport	10	2.0713	0.0214777
GO:0051209	release of sequestered calcium ion into cytosol	7	2.46148	0.0216393
GO:2000134	negative regulation of G1/S transition of mitotic cell cycle	7	2.46148	0.0216393
GO:0010596	negative regulation of endothelial cell migration	5	3.0241	0.0219902
GO:0043083	synaptic cleft	5	3.0241	0.0219902
GO:0045475	locomotor rhythm	5	3.0241	0.0219902
GO:0046849	bone remodeling	5	3.0241	0.0219902
GO:0046928	regulation of neurotransmitter secretion	5	3.0241	0.0219902
GO:0050868	negative regulation of T cell activation	5	3.0241	0.0219902
GO:0071391	cellular response to estrogen stimulus	5	3.0241	0.0219902
GO:0140416	transcription regulator inhibitor activity	5	3.0241	0.0219902
GO:0048018	receptor ligand activity	9	2.16007	0.0221382
GO:0070371	ERK1 and ERK2 cascade	9	2.16007	0.0221382
GO:0001937	negative regulation of endothelial cell proliferation	6	2.66832	0.0225581
GO:0001954	positive regulation of cell-matrix adhesion	6	2.66832	0.0225581
GO:0045840	positive regulation of mitotic nuclear division	6	2.66832	0.0225581
GO:0051497	negative regulation of stress fiber assembly	6	2.66832	0.0225581
GO:0001878	response to yeast	4	3.55776	0.0226464
GO:0006801	superoxide metabolic process	4	3.55776	0.0226464
GO:0008028	monocarboxylic acid transmembrane transporter activity	4	3.55776	0.0226464
GO:0015909	long-chain fatty acid transport	4	3.55776	0.0226464
GO:0016126	sterol biosynthetic process	4	3.55776	0.0226464
GO:0030502	negative regulation of bone mineralization	4	3.55776	0.0226464
GO:0042403	thyroid hormone metabolic process	4	3.55776	0.0226464
GO:0045820	negative regulation of glycolytic process	4	3.55776	0.0226464
GO:0047555	3',5'-cyclic-GMP phosphodiesterase activity	4	3.55776	0.0226464
GO:0048246	macrophage chemotaxis	4	3.55776	0.0226464
GO:0050930	induction of positive chemotaxis	4	3.55776	0.0226464
GO:0097067	cellular response to thyroid hormone stimulus	4	3.55776	0.0226464
GO:1902430	negative regulation of amyloid-beta formation	4	3.55776	0.0226464
GO:0030027	lamellipodium	22	1.57654	0.0230766
GO:0001570	vasculogenesis	10	2.04331	0.0234131
GO:0032024	positive regulation of insulin secretion	10	2.04331	0.0234131
GO:0045860	positive regulation of protein kinase activity	10	2.04331	0.0234131
GO:0035556	intracellular signal transduction	37	1.40215	0.0238672
GO:0001772	immunological synapse	7	2.40553	0.0243114
GO:0007157	heterophilic cell-cell adhesion via plasma membrane cell adhesion molecules	7	2.40553	0.0243114
GO:0007616	long-term memory	7	2.40553	0.0243114
GO:0048147	negative regulation of fibroblast proliferation	7	2.40553	0.0243114
GO:0048565	digestive tract development	7	2.40553	0.0243114
GO:0001574	ganglioside biosynthetic process	3	4.53615	0.0243741
GO:0002438	acute inflammatory response to antigenic stimulus	3	4.53615	0.0243741
GO:0007567	parturition	3	4.53615	0.0243741
GO:0010193	response to ozone	3	4.53615	0.0243741
GO:0010828	positive regulation of glucose transmembrane transport	3	4.53615	0.0243741
GO:0015269	calcium-activated potassium channel activity	3	4.53615	0.0243741
GO:0019215	intermediate filament binding	3	4.53615	0.0243741
GO:0021517	ventral spinal cord development	3	4.53615	0.0243741
GO:0032036	myosin heavy chain binding	3	4.53615	0.0243741
GO:0034392	negative regulation of smooth muscle cell apoptotic process	3	4.53615	0.0243741
GO:0035360	positive regulation of peroxisome proliferator activated receptor signaling pathway	3	4.53615	0.0243741
GO:0035767	endothelial cell chemotaxis	3	4.53615	0.0243741
GO:0045822	negative regulation of heart contraction	3	4.53615	0.0243741
GO:0050665	hydrogen peroxide biosynthetic process	3	4.53615	0.0243741
GO:0050764	regulation of phagocytosis	3	4.53615	0.0243741
GO:0051315	attachment of mitotic spindle microtubules to kinetochore	3	4.53615	0.0243741
GO:0055119	relaxation of cardiac muscle	3	4.53615	0.0243741
GO:0060740	prostate gland epithelium morphogenesis	3	4.53615	0.0243741
GO:0071373	cellular response to luteinizing hormone stimulus	3	4.53615	0.0243741
GO:0071813	lipoprotein particle binding	3	4.53615	0.0243741
GO:1990874	vascular associated smooth muscle cell proliferation	3	4.53615	0.0243741
GO:2000987	positive regulation of behavioral fear response	3	4.53615	0.0243741
GO:2001069	glycogen binding	3	4.53615	0.0243741
GO:0010043	response to zinc ion	8	2.24007	0.0247118
GO:0045787	positive regulation of cell cycle	8	2.24007	0.0247118
GO:0071364	cellular response to epidermal growth factor stimulus	8	2.24007	0.0247118
GO:0031528	microvillus membrane	6	2.59208	0.0257489
GO:0035904	aorta development	6	2.59208	0.0257489
GO:0042246	tissue regeneration	6	2.59208	0.0257489
GO:0071526	semaphorin-plexin signaling pathway	6	2.59208	0.0257489
GO:0001779	natural killer cell differentiation	5	2.90779	0.0257848
GO:0010765	positive regulation of sodium ion transport	5	2.90779	0.0257848
GO:0032930	positive regulation of superoxide anion generation	5	2.90779	0.0257848
GO:0040008	regulation of growth	5	2.90779	0.0257848
GO:0048265	response to pain	5	2.90779	0.0257848
GO:0060252	positive regulation of glial cell proliferation	5	2.90779	0.0257848
GO:0090023	positive regulation of neutrophil chemotaxis	5	2.90779	0.0257848
GO:1900017	positive regulation of cytokine production involved in inflammatory response	5	2.90779	0.0257848
GO:0032715	negative regulation of interleukin-6 production	9	2.09361	0.0266106
GO:0001530	lipopolysaccharide binding	7	2.35208	0.0272014
GO:0007614	short-term memory	4	3.36011	0.0276294
GO:0030673	axolemma	4	3.36011	0.0276294
GO:0031434	mitogen-activated protein kinase kinase binding	4	3.36011	0.0276294
GO:0042953	lipoprotein transport	4	3.36011	0.0276294
GO:0043116	negative regulation of vascular permeability	4	3.36011	0.0276294
GO:0043171	peptide catabolic process	4	3.36011	0.0276294
GO:0086005	ventricular cardiac muscle cell action potential	4	3.36011	0.0276294
GO:0007612	learning	10	1.98954	0.027656
GO:0043406	positive regulation of MAP kinase activity	11	1.91179	0.0280856
GO:0001558	regulation of cell growth	9	2.06189	0.0290704
GO:0001782	B cell homeostasis	6	2.52008	0.029226
GO:0043029	T cell homeostasis	6	2.52008	0.029226
GO:0043388	positive regulation of DNA binding	6	2.52008	0.029226
GO:0043542	endothelial cell migration	6	2.52008	0.029226
GO:0048168	regulation of neuronal synaptic plasticity	6	2.52008	0.029226
GO:0060349	bone morphogenesis	6	2.52008	0.029226
GO:0032922	circadian regulation of gene expression	10	1.9637	0.0299709
GO:0003073	regulation of systemic arterial blood pressure	5	2.80009	0.0299734
GO:0009954	proximal/distal pattern formation	5	2.80009	0.0299734
GO:0034332	adherens junction organization	5	2.80009	0.0299734
GO:0043236	laminin binding	5	2.80009	0.0299734
GO:0046628	positive regulation of insulin receptor signaling pathway	5	2.80009	0.0299734
GO:0050850	positive regulation of calcium-mediated signaling	5	2.80009	0.0299734
GO:0061003	positive regulation of dendritic spine morphogenesis	5	2.80009	0.0299734
GO:0030246	carbohydrate binding	23	1.51865	0.0301067
GO:0035249	synaptic transmission, glutamatergic	7	2.30094	0.0303162
GO:0032868	response to insulin	14	1.73514	0.0307803
GO:0050830	defense response to Gram-positive bacterium	17	1.63725	0.030797
GO:0032757	positive regulation of interleukin-8 production	9	2.03111	0.031685
GO:0043154	negative regulation of cysteine-type endopeptidase activity involved in apoptotic process	9	2.03111	0.031685
GO:0000578	embryonic axis specification	3	4.12377	0.0318966
GO:0001823	mesonephros development	3	4.12377	0.0318966
GO:0004652	polynucleotide adenylyltransferase activity	3	4.12377	0.0318966
GO:0005041	low-density lipoprotein particle receptor activity	3	4.12377	0.0318966
GO:0005388	P-type calcium transporter activity	3	4.12377	0.0318966
GO:0005883	neurofilament	3	4.12377	0.0318966
GO:0006068	ethanol catabolic process	3	4.12377	0.0318966
GO:0019896	axonal transport of mitochondrion	3	4.12377	0.0318966
GO:0030949	positive regulation of vascular endothelial growth factor receptor signaling pathway	3	4.12377	0.0318966
GO:0031402	sodium ion binding	3	4.12377	0.0318966
GO:0032825	positive regulation of natural killer cell differentiation	3	4.12377	0.0318966
GO:0038166	angiotensin-activated signaling pathway	3	4.12377	0.0318966
GO:0043568	positive regulation of insulin-like growth factor receptor signaling pathway	3	4.12377	0.0318966
GO:0044326	dendritic spine neck	3	4.12377	0.0318966
GO:0045503	dynein light chain binding	3	4.12377	0.0318966
GO:0045616	regulation of keratinocyte differentiation	3	4.12377	0.0318966
GO:0060119	inner ear receptor cell development	3	4.12377	0.0318966
GO:0060385	axonogenesis involved in innervation	3	4.12377	0.0318966
GO:0070995	NADPH oxidation	3	4.12377	0.0318966
GO:0072112	podocyte differentiation	3	4.12377	0.0318966
GO:0097011	cellular response to granulocyte macrophage colony-stimulating factor stimulus	3	4.12377	0.0318966
GO:0097677	STAT family protein binding	3	4.12377	0.0318966
GO:1902475	L-alpha-amino acid transmembrane transport	3	4.12377	0.0318966
GO:1990440	positive regulation of transcription from RNA polymerase II promoter in response to endoplasmic reticulum stress	3	4.12377	0.0318966
GO:0042102	positive regulation of T cell proliferation	11	1.86882	0.032537
GO:0034612	response to tumor necrosis factor	6	2.45197	0.0329975
GO:0045089	positive regulation of innate immune response	6	2.45197	0.0329975
GO:0048709	oligodendrocyte differentiation	8	2.12217	0.0330281
GO:0007051	spindle organization	4	3.18326	0.0332143
GO:0030296	protein tyrosine kinase activator activity	4	3.18326	0.0332143
GO:0031000	response to caffeine	4	3.18326	0.0332143
GO:0035457	cellular response to interferon-alpha	4	3.18326	0.0332143
GO:0040029	epigenetic regulation of gene expression	4	3.18326	0.0332143
GO:0050848	regulation of calcium-mediated signaling	4	3.18326	0.0332143
GO:0051016	barbed-end actin filament capping	4	3.18326	0.0332143
GO:0030672	synaptic vesicle membrane	15	1.68005	0.0334647
GO:0030073	insulin secretion	7	2.25199	0.0336619
GO:0048662	negative regulation of smooth muscle cell proliferation	7	2.25199	0.0336619
GO:0070888	E-box binding	7	2.25199	0.0336619
GO:0045211	postsynaptic membrane	23	1.49901	0.0342415
GO:0046330	positive regulation of JNK cascade	12	1.79649	0.0344541
GO:0043198	dendritic shaft	9	2.00124	0.0344584
GO:0048839	inner ear development	9	2.00124	0.0344584
GO:0022409	positive regulation of cell-cell adhesion	5	2.70009	0.034566
GO:0071280	cellular response to copper ion	5	2.70009	0.034566
GO:0004175	endopeptidase activity	11	1.84806	0.0349407
GO:0008022	protein C-terminus binding	23	1.49258	0.03571
GO:0010008	endosome membrane	17	1.60655	0.0360103
GO:0031623	receptor internalization	8	2.08558	0.0361772
GO:0036094	small molecule binding	8	2.08558	0.0361772
GO:0042594	response to starvation	8	2.08558	0.0361772
GO:0008528	G protein-coupled peptide receptor activity	6	2.38745	0.0370707
GO:0033189	response to vitamin A	6	2.38745	0.0370707
GO:2001235	positive regulation of apoptotic signaling pathway	6	2.38745	0.0370707
GO:0001837	epithelial to mesenchymal transition	9	1.97224	0.0373943
GO:0001757	somite specification	2	6.0482	0.0382165
GO:0001798	positive regulation of type IIa hypersensitivity	2	6.0482	0.0382165
GO:0001805	positive regulation of type III hypersensitivity	2	6.0482	0.0382165
GO:0002328	pro-B cell differentiation	2	6.0482	0.0382165
GO:0002448	mast cell mediated immunity	2	6.0482	0.0382165
GO:0002669	positive regulation of T cell anergy	2	6.0482	0.0382165
GO:0002732	positive regulation of dendritic cell cytokine production	2	6.0482	0.0382165
GO:0002865	negative regulation of acute inflammatory response to antigenic stimulus	2	6.0482	0.0382165
GO:0003006	developmental process involved in reproduction	2	6.0482	0.0382165
GO:0003081	regulation of systemic arterial blood pressure by renin-angiotensin	2	6.0482	0.0382165
GO:0003105	negative regulation of glomerular filtration	2	6.0482	0.0382165
GO:0003150	muscular septum morphogenesis	2	6.0482	0.0382165
GO:0003161	cardiac conduction system development	2	6.0482	0.0382165
GO:0003211	cardiac ventricle formation	2	6.0482	0.0382165
GO:0004024	alcohol dehydrogenase activity, zinc-dependent	2	6.0482	0.0382165
GO:0004687	myosin light chain kinase activity	2	6.0482	0.0382165
GO:0004740	pyruvate dehydrogenase (acetyl-transferring) kinase activity	2	6.0482	0.0382165
GO:0005001	transmembrane receptor protein tyrosine phosphatase activity	2	6.0482	0.0382165
GO:0005332	gamma-aminobutyric acid:sodium:chloride symporter activity	2	6.0482	0.0382165
GO:0006069	ethanol oxidation	2	6.0482	0.0382165
GO:0006147	guanine catabolic process	2	6.0482	0.0382165
GO:0006161	deoxyguanosine catabolic process	2	6.0482	0.0382165
GO:0007171	activation of transmembrane receptor protein tyrosine kinase activity	2	6.0482	0.0382165
GO:0007589	body fluid secretion	2	6.0482	0.0382165
GO:0008238	exopeptidase activity	2	6.0482	0.0382165
GO:0008366	axon ensheathment	2	6.0482	0.0382165
GO:0010644	cell communication by electrical coupling	2	6.0482	0.0382165
GO:0010749	regulation of nitric oxide mediated signal transduction	2	6.0482	0.0382165
GO:0010822	positive regulation of mitochondrion organization	2	6.0482	0.0382165
GO:0015254	glycerol channel activity	2	6.0482	0.0382165
GO:0019770	IgG receptor activity	2	6.0482	0.0382165
GO:0032280	symmetric synapse	2	6.0482	0.0382165
GO:0032310	prostaglandin secretion	2	6.0482	0.0382165
GO:0033007	negative regulation of mast cell activation involved in immune response	2	6.0482	0.0382165
GO:0033326	cerebrospinal fluid secretion	2	6.0482	0.0382165
GO:0034197	triglyceride transport	2	6.0482	0.0382165
GO:0034241	positive regulation of macrophage fusion	2	6.0482	0.0382165
GO:0035860	glial cell-derived neurotrophic factor receptor signaling pathway	2	6.0482	0.0382165
GO:0036343	psychomotor behavior	2	6.0482	0.0382165
GO:0038133	ERBB2-ERBB3 signaling pathway	2	6.0482	0.0382165
GO:0038135	ERBB2-ERBB4 signaling pathway	2	6.0482	0.0382165
GO:0042482	positive regulation of odontogenesis	2	6.0482	0.0382165
GO:0043120	tumor necrosis factor binding	2	6.0482	0.0382165
GO:0043378	positive regulation of CD8-positive, alpha-beta T cell differentiation	2	6.0482	0.0382165
GO:0043462	regulation of ATP-dependent activity	2	6.0482	0.0382165
GO:0043533	inositol 1,3,4,5 tetrakisphosphate binding	2	6.0482	0.0382165
GO:0043949	regulation of cAMP-mediated signaling	2	6.0482	0.0382165
GO:0044070	regulation of anion transport	2	6.0482	0.0382165
GO:0044546	NLRP3 inflammasome complex assembly	2	6.0482	0.0382165
GO:0045123	cellular extravasation	2	6.0482	0.0382165
GO:0045142	triplex DNA binding	2	6.0482	0.0382165
GO:0045837	negative regulation of membrane potential	2	6.0482	0.0382165
GO:0046881	positive regulation of follicle-stimulating hormone secretion	2	6.0482	0.0382165
GO:0048105	establishment of body hair planar orientation	2	6.0482	0.0382165
GO:0048619	embryonic hindgut morphogenesis	2	6.0482	0.0382165
GO:0051048	negative regulation of secretion	2	6.0482	0.0382165
GO:0051970	negative regulation of transmission of nerve impulse	2	6.0482	0.0382165
GO:0060023	soft palate development	2	6.0482	0.0382165
GO:0060086	circadian temperature homeostasis	2	6.0482	0.0382165
GO:0060298	positive regulation of sarcomere organization	2	6.0482	0.0382165
GO:0060537	muscle tissue development	2	6.0482	0.0382165
GO:0060676	ureteric bud formation	2	6.0482	0.0382165
GO:0060978	angiogenesis involved in coronary vascular morphogenesis	2	6.0482	0.0382165
GO:0061035	regulation of cartilage development	2	6.0482	0.0382165
GO:0070401	NADP+ binding	2	6.0482	0.0382165
GO:0070538	oleic acid binding	2	6.0482	0.0382165
GO:0070543	response to linoleic acid	2	6.0482	0.0382165
GO:0071376	cellular response to corticotropin-releasing hormone stimulus	2	6.0482	0.0382165
GO:0071386	cellular response to corticosterone stimulus	2	6.0482	0.0382165
GO:0071418	cellular response to amine stimulus	2	6.0482	0.0382165
GO:0071871	response to epinephrine	2	6.0482	0.0382165
GO:0072207	metanephric epithelium development	2	6.0482	0.0382165
GO:0072284	metanephric S-shaped body morphogenesis	2	6.0482	0.0382165
GO:0072345	NAADP-sensitive calcium-release channel activity	2	6.0482	0.0382165
GO:0090402	oncogene-induced cell senescence	2	6.0482	0.0382165
GO:0097169	AIM2 inflammasome complex	2	6.0482	0.0382165
GO:0097411	hypoxia-inducible factor-1alpha signaling pathway	2	6.0482	0.0382165
GO:0097418	neurofibrillary tangle	2	6.0482	0.0382165
GO:0097427	microtubule bundle	2	6.0482	0.0382165
GO:0098636	protein complex involved in cell adhesion	2	6.0482	0.0382165
GO:0098977	inhibitory chemical synaptic transmission	2	6.0482	0.0382165
GO:0099183	trans-synaptic signaling by BDNF, modulating synaptic transmission	2	6.0482	0.0382165
GO:0110091	negative regulation of hippocampal neuron apoptotic process	2	6.0482	0.0382165
GO:0140346	phosphatidylserine flippase activity	2	6.0482	0.0382165
GO:0150099	neuron-glial cell signaling	2	6.0482	0.0382165
GO:1900127	positive regulation of hyaluronan biosynthetic process	2	6.0482	0.0382165
GO:1902177	positive regulation of oxidative stress-induced intrinsic apoptotic signaling pathway	2	6.0482	0.0382165
GO:1903052	positive regulation of proteolysis involved in protein catabolic process	2	6.0482	0.0382165
GO:1904457	positive regulation of neuronal action potential	2	6.0482	0.0382165
GO:1904637	cellular response to ionomycin	2	6.0482	0.0382165
GO:1904717	regulation of AMPA glutamate receptor clustering	2	6.0482	0.0382165
GO:1904976	cellular response to bleomycin	2	6.0482	0.0382165
GO:1905477	positive regulation of protein localization to membrane	2	6.0482	0.0382165
GO:1905867	epididymis development	2	6.0482	0.0382165
GO:1990769	proximal neuron projection	2	6.0482	0.0382165
GO:2000503	positive regulation of natural killer cell chemotaxis	2	6.0482	0.0382165
GO:0002042	cell migration involved in sprouting angiogenesis	4	3.0241	0.0394087
GO:0003094	glomerular filtration	4	3.0241	0.0394087
GO:0004435	phosphatidylinositol phospholipase C activity	4	3.0241	0.0394087
GO:0017075	syntaxin-1 binding	4	3.0241	0.0394087
GO:0021542	dentate gyrus development	4	3.0241	0.0394087
GO:0030031	cell projection assembly	4	3.0241	0.0394087
GO:0030595	leukocyte chemotaxis	4	3.0241	0.0394087
GO:0032793	positive regulation of CREB transcription factor activity	4	3.0241	0.0394087
GO:0035641	locomotory exploration behavior	4	3.0241	0.0394087
GO:0043292	contractile fiber	4	3.0241	0.0394087
GO:0045178	basal part of cell	4	3.0241	0.0394087
GO:0046935	1-phosphatidylinositol-3-kinase regulator activity	4	3.0241	0.0394087
GO:0032740	positive regulation of interleukin-17 production	5	2.60698	0.0395705
GO:0045499	chemorepellent activity	5	2.60698	0.0395705
GO:2000179	positive regulation of neural precursor cell proliferation	5	2.60698	0.0395705
GO:0000255	allantoin metabolic process	3	3.78012	0.0404837
GO:0002087	regulation of respiratory gaseous exchange by nervous system process	3	3.78012	0.0404837
GO:0002430	complement receptor mediated signaling pathway	3	3.78012	0.0404837
GO:0003149	membranous septum morphogenesis	3	3.78012	0.0404837
GO:0003300	cardiac muscle hypertrophy	3	3.78012	0.0404837
GO:0004875	complement receptor activity	3	3.78012	0.0404837
GO:0014824	artery smooth muscle contraction	3	3.78012	0.0404837
GO:0015807	L-amino acid transport	3	3.78012	0.0404837
GO:0017154	semaphorin receptor activity	3	3.78012	0.0404837
GO:0034501	protein localization to kinetochore	3	3.78012	0.0404837
GO:0035726	common myeloid progenitor cell proliferation	3	3.78012	0.0404837
GO:0035739	CD4-positive, alpha-beta T cell proliferation	3	3.78012	0.0404837
GO:0043405	regulation of MAP kinase activity	3	3.78012	0.0404837
GO:0043605	amide catabolic process	3	3.78012	0.0404837
GO:0044320	cellular response to leptin stimulus	3	3.78012	0.0404837
GO:0044752	response to human chorionic gonadotropin	3	3.78012	0.0404837
GO:0045657	positive regulation of monocyte differentiation	3	3.78012	0.0404837
GO:0090650	cellular response to oxygen-glucose deprivation	3	3.78012	0.0404837
GO:0097062	dendritic spine maintenance	3	3.78012	0.0404837
GO:1900454	positive regulation of long-term synaptic depression	3	3.78012	0.0404837
GO:0034220	ion transmembrane transport	10	1.86673	0.0405993
GO:0001818	negative regulation of cytokine production	7	2.16007	0.0410686
GO:0006952	defense response	7	2.16007	0.0410686
GO:0010862	positive regulation of pathway-restricted SMAD protein phosphorylation	7	2.16007	0.0410686
GO:0030032	lamellipodium assembly	6	2.32623	0.0414516
GO:0042056	chemoattractant activity	6	2.32623	0.0414516
GO:0051968	positive regulation of synaptic transmission, glutamatergic	6	2.32623	0.0414516
GO:0071276	cellular response to cadmium ion	6	2.32623	0.0414516
GO:0090263	positive regulation of canonical Wnt signaling pathway	12	1.74467	0.0418055
GO:0005925	focal adhesion	21	1.49778	0.0419115
GO:0003779	actin binding	27	1.41755	0.0427857
GO:0022857	transmembrane transporter activity	13	1.69454	0.042942
GO:1901215	negative regulation of neuron death	10	1.84396	0.0436139
GO:0005768	endosome	31	1.37863	0.0437543
GO:0045893	positive regulation of DNA-templated transcription	60	1.24963	0.0437573
GO:0016327	apicolateral plasma membrane	5	2.52008	0.0449927
GO:0071354	cellular response to interleukin-6	5	2.52008	0.0449927
GO:0099524	postsynaptic cytosol	5	2.52008	0.0449927
GO:0099560	synaptic membrane adhesion	5	2.52008	0.0449927
GO:0009966	regulation of signal transduction	7	2.11687	0.045139
GO:0035458	cellular response to interferon-beta	7	2.11687	0.045139
GO:0032991	protein-containing complex	70	1.22362	0.0459654
GO:0007417	central nervous system development	14	1.64098	0.0461052
GO:0003281	ventricular septum development	6	2.26807	0.0461452
GO:0034614	cellular response to reactive oxygen species	6	2.26807	0.0461452
GO:0045214	sarcomere organization	6	2.26807	0.0461452
GO:0070059	intrinsic apoptotic signaling pathway in response to endoplasmic reticulum stress	6	2.26807	0.0461452
GO:0001773	myeloid dendritic cell activation	4	2.88009	0.0462151
GO:0032332	positive regulation of chondrocyte differentiation	4	2.88009	0.0462151
GO:0043295	glutathione binding	4	2.88009	0.0462151
GO:0070886	positive regulation of calcineurin-NFAT signaling cascade	4	2.88009	0.0462151
GO:0072520	seminiferous tubule development	4	2.88009	0.0462151
GO:0090050	positive regulation of cell migration involved in sprouting angiogenesis	4	2.88009	0.0462151
GO:2000251	positive regulation of actin cytoskeleton reorganization	4	2.88009	0.0462151
GO:0035176	social behavior	8	1.98302	0.0468167
GO:0042311	vasodilation	8	1.98302	0.0468167
GO:0031175	neuron projection development	19	1.51205	0.0471615
GO:0098839	postsynaptic density membrane	13	1.66582	0.0481872
GO:0008289	lipid binding	16	1.57096	0.0486655
GO:0004896	cytokine receptor activity	7	2.07536	0.0494593
GO:0001553	luteinization	3	3.48934	0.0501079
GO:0001775	cell activation	3	3.48934	0.0501079
GO:0002064	epithelial cell development	3	3.48934	0.0501079
GO:0009100	glycoprotein metabolic process	3	3.48934	0.0501079
GO:0010955	negative regulation of protein processing	3	3.48934	0.0501079
GO:0015267	channel activity	3	3.48934	0.0501079
GO:0017166	vinculin binding	3	3.48934	0.0501079
GO:0019841	retinol binding	3	3.48934	0.0501079
GO:0030856	regulation of epithelial cell differentiation	3	3.48934	0.0501079
GO:0031649	heat generation	3	3.48934	0.0501079
GO:0031994	insulin-like growth factor I binding	3	3.48934	0.0501079
GO:0034695	response to prostaglandin E	3	3.48934	0.0501079
GO:0035988	chondrocyte proliferation	3	3.48934	0.0501079
GO:0043267	negative regulation of potassium ion transport	3	3.48934	0.0501079
GO:0048771	tissue remodeling	3	3.48934	0.0501079
GO:0051378	serotonin binding	3	3.48934	0.0501079
GO:0055008	cardiac muscle tissue morphogenesis	3	3.48934	0.0501079
GO:0060080	inhibitory postsynaptic potential	3	3.48934	0.0501079
GO:0060394	negative regulation of pathway-restricted SMAD protein phosphorylation	3	3.48934	0.0501079
GO:0061099	negative regulation of protein tyrosine kinase activity	3	3.48934	0.0501079
GO:0062009	secondary palate development	3	3.48934	0.0501079
GO:1904996	positive regulation of leukocyte adhesion to vascular endothelial cell	3	3.48934	0.0501079
GO:1990531	phospholipid-translocating ATPase complex	3	3.48934	0.0501079
GO:1990542	mitochondrial transmembrane transport	3	3.48934	0.0501079
GO:2000273	positive regulation of signaling receptor activity	3	3.48934	0.0501079
GO:0033280	response to vitamin D	5	2.43879	0.0508361
GO:0035050	embryonic heart tube development	5	2.43879	0.0508361
GO:0048255	mRNA stabilization	6	2.21275	0.0511554
GO:0050807	regulation of synapse organization	6	2.21275	0.0511554
GO:0060412	ventricular septum morphogenesis	6	2.21275	0.0511554
GO:0071277	cellular response to calcium ion	11	1.73256	0.0520153
GO:0001228	DNA-binding transcription activator activity, RNA polymerase II-specific	42	1.2934	0.0525617
GO:0007268	chemical synaptic transmission	20	1.47517	0.0526348
GO:0030154	cell differentiation	60	1.23433	0.0531886
GO:0005942	phosphatidylinositol 3-kinase complex	4	2.74918	0.0536318
GO:0010666	positive regulation of cardiac muscle cell apoptotic process	4	2.74918	0.0536318
GO:0015718	monocarboxylic acid transport	4	2.74918	0.0536318
GO:0021954	central nervous system neuron development	4	2.74918	0.0536318
GO:0022011	myelination in peripheral nervous system	4	2.74918	0.0536318
GO:0038187	pattern recognition receptor activity	4	2.74918	0.0536318
GO:0046488	phosphatidylinositol metabolic process	4	2.74918	0.0536318
GO:0048010	vascular endothelial growth factor receptor signaling pathway	4	2.74918	0.0536318
GO:0051481	negative regulation of cytosolic calcium ion concentration	4	2.74918	0.0536318
GO:0051770	positive regulation of nitric-oxide synthase biosynthetic process	4	2.74918	0.0536318
GO:0071404	cellular response to low-density lipoprotein particle stimulus	4	2.74918	0.0536318
GO:1900227	positive regulation of NLRP3 inflammasome complex assembly	4	2.74918	0.0536318
GO:2000353	positive regulation of endothelial cell apoptotic process	4	2.74918	0.0536318
GO:2001224	positive regulation of neuron migration	4	2.74918	0.0536318
GO:0004714	transmembrane receptor protein tyrosine kinase activity	7	2.03545	0.0540327
GO:0001609	G protein-coupled adenosine receptor activity	2	5.04016	0.0548445
GO:0001665	alpha-N-acetylgalactosaminide alpha-2,6-sialyltransferase activity	2	5.04016	0.0548445
GO:0001787	natural killer cell proliferation	2	5.04016	0.0548445
GO:0001821	histamine secretion	2	5.04016	0.0548445
GO:0002238	response to molecule of fungal origin	2	5.04016	0.0548445
GO:0002439	chronic inflammatory response to antigenic stimulus	2	5.04016	0.0548445
GO:0002674	negative regulation of acute inflammatory response	2	5.04016	0.0548445
GO:0003289	atrial septum primum morphogenesis	2	5.04016	0.0548445
GO:0004468	lysine N-acetyltransferase activity, acting on acetyl phosphate as donor	2	5.04016	0.0548445
GO:0004908	interleukin-1 receptor activity	2	5.04016	0.0548445
GO:0005381	iron ion transmembrane transporter activity	2	5.04016	0.0548445
GO:0005384	manganese ion transmembrane transporter activity	2	5.04016	0.0548445
GO:0006116	NADH oxidation	2	5.04016	0.0548445
GO:0006751	glutathione catabolic process	2	5.04016	0.0548445
GO:0008510	sodium:bicarbonate symporter activity	2	5.04016	0.0548445
GO:0009143	nucleoside triphosphate catabolic process	2	5.04016	0.0548445
GO:0010046	response to mycotoxin	2	5.04016	0.0548445
GO:0010754	negative regulation of cGMP-mediated signaling	2	5.04016	0.0548445
GO:0010829	negative regulation of glucose transmembrane transport	2	5.04016	0.0548445
GO:0014063	negative regulation of serotonin secretion	2	5.04016	0.0548445
GO:0015204	urea transmembrane transporter activity	2	5.04016	0.0548445
GO:0015636	short-chain fatty acid transmembrane transporter activity	2	5.04016	0.0548445
GO:0015662	P-type ion transporter activity	2	5.04016	0.0548445
GO:0015677	copper ion import	2	5.04016	0.0548445
GO:0015840	urea transport	2	5.04016	0.0548445
GO:0030240	skeletal muscle thin filament assembly	2	5.04016	0.0548445
GO:0030666	endocytic vesicle membrane	2	5.04016	0.0548445
GO:0031802	type 5 metabotropic glutamate receptor binding	2	5.04016	0.0548445
GO:0032079	positive regulation of endodeoxyribonuclease activity	2	5.04016	0.0548445
GO:0033157	regulation of intracellular protein transport	2	5.04016	0.0548445
GO:0034235	GPI anchor binding	2	5.04016	0.0548445
GO:0034755	iron ion transmembrane transport	2	5.04016	0.0548445
GO:0036005	response to macrophage colony-stimulating factor	2	5.04016	0.0548445
GO:0038165	oncostatin-M-mediated signaling pathway	2	5.04016	0.0548445
GO:0043084	penile erection	2	5.04016	0.0548445
GO:0043515	kinetochore binding	2	5.04016	0.0548445
GO:0043549	regulation of kinase activity	2	5.04016	0.0548445
GO:0043619	regulation of transcription from RNA polymerase II promoter in response to oxidative stress	2	5.04016	0.0548445
GO:0043647	inositol phosphate metabolic process	2	5.04016	0.0548445
GO:0044206	UMP salvage	2	5.04016	0.0548445
GO:0045578	negative regulation of B cell differentiation	2	5.04016	0.0548445
GO:0048790	maintenance of presynaptic active zone structure	2	5.04016	0.0548445
GO:0051383	kinetochore organization	2	5.04016	0.0548445
GO:0051525	NFAT protein binding	2	5.04016	0.0548445
GO:0060005	vestibular reflex	2	5.04016	0.0548445
GO:0060129	thyroid-stimulating hormone-secreting cell differentiation	2	5.04016	0.0548445
GO:0060718	chorionic trophoblast cell differentiation	2	5.04016	0.0548445
GO:0061419	positive regulation of transcription from RNA polymerase II promoter in response to hypoxia	2	5.04016	0.0548445
GO:0070053	thrombospondin receptor activity	2	5.04016	0.0548445
GO:0071723	lipopeptide binding	2	5.04016	0.0548445
GO:0072307	regulation of metanephric nephron tubule epithelial cell differentiation	2	5.04016	0.0548445
GO:0072557	IPAF inflammasome complex	2	5.04016	0.0548445
GO:0090027	negative regulation of monocyte chemotaxis	2	5.04016	0.0548445
GO:0097070	ductus arteriosus closure	2	5.04016	0.0548445
GO:0098883	synapse pruning	2	5.04016	0.0548445
GO:0098900	regulation of action potential	2	5.04016	0.0548445
GO:0106411	XMP 5'-nucleosidase activity	2	5.04016	0.0548445
GO:1901164	negative regulation of trophoblast cell migration	2	5.04016	0.0548445
GO:1901299	negative regulation of hydrogen peroxide-mediated programmed cell death	2	5.04016	0.0548445
GO:1902041	regulation of extrinsic apoptotic signaling pathway via death domain receptors	2	5.04016	0.0548445
GO:1902737	dendritic filopodium	2	5.04016	0.0548445
GO:1903670	regulation of sprouting angiogenesis	2	5.04016	0.0548445
GO:1904141	positive regulation of microglial cell migration	2	5.04016	0.0548445
GO:1904738	vascular associated smooth muscle cell migration	2	5.04016	0.0548445
GO:1990402	embryonic liver development	2	5.04016	0.0548445
GO:2001033	negative regulation of double-strand break repair via nonhomologous end joining	2	5.04016	0.0548445
GO:0050661	NADP binding	8	1.92006	0.0549373
GO:0060041	retina development in camera-type eye	11	1.71469	0.0553238
GO:0001965	G-protein alpha-subunit binding	6	2.16007	0.0564851
GO:0005246	calcium channel regulator activity	6	2.16007	0.0564851
GO:0006826	iron ion transport	6	2.16007	0.0564851
GO:0042572	retinol metabolic process	6	2.16007	0.0564851
GO:0043473	pigmentation	6	2.16007	0.0564851
GO:0045776	negative regulation of blood pressure	6	2.16007	0.0564851
GO:0048675	axon extension	6	2.16007	0.0564851
GO:0098685	Schaffer collateral - CA1 synapse	15	1.56419	0.0566761
GO:0002639	positive regulation of immunoglobulin production	5	2.36258	0.0571025
GO:0006730	one-carbon metabolic process	5	2.36258	0.0571025
GO:0007159	leukocyte cell-cell adhesion	5	2.36258	0.0571025
GO:0042178	xenobiotic catabolic process	5	2.36258	0.0571025
GO:0045454	cell redox homeostasis	5	2.36258	0.0571025
GO:0045765	regulation of angiogenesis	5	2.36258	0.0571025
GO:0045777	positive regulation of blood pressure	5	2.36258	0.0571025
GO:0048009	insulin-like growth factor receptor signaling pathway	5	2.36258	0.0571025
GO:0007059	chromosome segregation	10	1.7582	0.0571793
GO:0016055	Wnt signaling pathway	19	1.47328	0.0583582
GO:0070301	cellular response to hydrogen peroxide	11	1.6972	0.0587695
GO:0021915	neural tube development	7	1.99705	0.0588616
GO:0051219	phosphoprotein binding	7	1.99705	0.0588616
GO:0051602	response to electrical stimulus	7	1.99705	0.0588616
GO:0045599	negative regulation of fat cell differentiation	8	1.89006	0.0593139
GO:0019903	protein phosphatase binding	13	1.6112	0.0599684
GO:0001931	uropod	3	3.24011	0.0607308
GO:0005161	platelet-derived growth factor receptor binding	3	3.24011	0.0607308
GO:0005523	tropomyosin binding	3	3.24011	0.0607308
GO:0005865	striated muscle thin filament	3	3.24011	0.0607308
GO:0010838	positive regulation of keratinocyte proliferation	3	3.24011	0.0607308
GO:0019871	sodium channel inhibitor activity	3	3.24011	0.0607308
GO:0031953	negative regulation of protein autophosphorylation	3	3.24011	0.0607308
GO:0032732	positive regulation of interleukin-1 production	3	3.24011	0.0607308
GO:0032754	positive regulation of interleukin-5 production	3	3.24011	0.0607308
GO:0033689	negative regulation of osteoblast proliferation	3	3.24011	0.0607308
GO:0036376	sodium ion export across plasma membrane	3	3.24011	0.0607308
GO:0042581	specific granule	3	3.24011	0.0607308
GO:0043922	negative regulation by host of viral transcription	3	3.24011	0.0607308
GO:0043931	ossification involved in bone maturation	3	3.24011	0.0607308
GO:0045446	endothelial cell differentiation	3	3.24011	0.0607308
GO:0048711	positive regulation of astrocyte differentiation	3	3.24011	0.0607308
GO:0048762	mesenchymal cell differentiation	3	3.24011	0.0607308
GO:0060317	cardiac epithelial to mesenchymal transition	3	3.24011	0.0607308
GO:0060674	placenta blood vessel development	3	3.24011	0.0607308
GO:0070097	delta-catenin binding	3	3.24011	0.0607308
GO:0070102	interleukin-6-mediated signaling pathway	3	3.24011	0.0607308
GO:0071313	cellular response to caffeine	3	3.24011	0.0607308
GO:0071492	cellular response to UV-A	3	3.24011	0.0607308
GO:0071872	cellular response to epinephrine stimulus	3	3.24011	0.0607308
GO:0086002	cardiac muscle cell action potential involved in contraction	3	3.24011	0.0607308
GO:0097320	plasma membrane tubulation	3	3.24011	0.0607308
GO:0097475	motor neuron migration	3	3.24011	0.0607308
GO:1901612	cardiolipin binding	3	3.24011	0.0607308
GO:1901800	positive regulation of proteasomal protein catabolic process	3	3.24011	0.0607308
GO:2001046	positive regulation of integrin-mediated signaling pathway	3	3.24011	0.0607308
GO:0010468	regulation of gene expression	34	1.3182	0.0607686
GO:0070373	negative regulation of ERK1 and ERK2 cascade	10	1.73799	0.0609578
GO:0001556	oocyte maturation	4	2.62965	0.0616526
GO:0003823	antigen binding	4	2.62965	0.0616526
GO:0005242	inward rectifier potassium channel activity	4	2.62965	0.0616526
GO:0016064	immunoglobulin mediated immune response	4	2.62965	0.0616526
GO:0017015	regulation of transforming growth factor beta receptor signaling pathway	4	2.62965	0.0616526
GO:0031681	G-protein beta-subunit binding	4	2.62965	0.0616526
GO:0035023	regulation of Rho protein signal transduction	4	2.62965	0.0616526
GO:1901981	phosphatidylinositol phosphate binding	4	2.62965	0.0616526
GO:0043547	positive regulation of GTPase activity	20	1.44694	0.0618173
GO:0002027	regulation of heart rate	6	2.10984	0.0621358
GO:0003785	actin monomer binding	6	2.10984	0.0621358
GO:0044295	axonal growth cone	6	2.10984	0.0621358
GO:0002218	activation of innate immune response	5	2.29098	0.0637915
GO:0005640	nuclear outer membrane	5	2.29098	0.0637915
GO:0015179	L-amino acid transmembrane transporter activity	5	2.29098	0.0637915
GO:0090303	positive regulation of wound healing	5	2.29098	0.0637915
GO:0140678	molecular function inhibitor activity	5	2.29098	0.0637915
GO:2000352	negative regulation of endothelial cell apoptotic process	5	2.29098	0.0637915
GO:0030133	transport vesicle	8	1.86098	0.0639038
GO:0001223	transcription coactivator binding	7	1.96006	0.0639478
GO:0010507	negative regulation of autophagy	7	1.96006	0.0639478
GO:0015293	symporter activity	7	1.96006	0.0639478
GO:0031334	positive regulation of protein-containing complex assembly	7	1.96006	0.0639478
GO:0030097	hemopoiesis	10	1.71824	0.0648943
GO:0051592	response to calcium ion	10	1.71824	0.0648943
GO:0005198	structural molecule activity	14	1.55652	0.0661005
GO:0032956	regulation of actin cytoskeleton organization	9	1.76733	0.0670992
GO:0032689	negative regulation of type II interferon production	6	2.06189	0.068108
GO:0001786	phosphatidylserine binding	8	1.83279	0.0687084
GO:0032091	negative regulation of protein binding	10	1.69893	0.0689901
GO:0034599	cellular response to oxidative stress	11	1.64679	0.0699429
GO:0001516	prostaglandin biosynthetic process	4	2.52008	0.0702676
GO:0003085	negative regulation of systemic arterial blood pressure	4	2.52008	0.0702676
GO:0005540	hyaluronic acid binding	4	2.52008	0.0702676
GO:0006970	response to osmotic stress	4	2.52008	0.0702676
GO:0014032	neural crest cell development	4	2.52008	0.0702676
GO:0030301	cholesterol transport	4	2.52008	0.0702676
GO:0048593	camera-type eye morphogenesis	4	2.52008	0.0702676
GO:0060416	response to growth hormone	4	2.52008	0.0702676
GO:2000406	positive regulation of T cell migration	4	2.52008	0.0702676
GO:0002040	sprouting angiogenesis	5	2.2236	0.0709007
GO:0002102	podosome	5	2.2236	0.0709007
GO:0018149	peptide cross-linking	5	2.2236	0.0709007
GO:0021537	telencephalon development	5	2.2236	0.0709007
GO:0048008	platelet-derived growth factor receptor signaling pathway	5	2.2236	0.0709007
GO:0055072	iron ion homeostasis	5	2.2236	0.0709007
GO:0001893	maternal placenta development	3	3.0241	0.0723058
GO:0002082	regulation of oxidative phosphorylation	3	3.0241	0.0723058
GO:0005159	insulin-like growth factor receptor binding	3	3.0241	0.0723058
GO:0005160	transforming growth factor beta receptor binding	3	3.0241	0.0723058
GO:0006536	glutamate metabolic process	3	3.0241	0.0723058
GO:0006790	sulfur compound metabolic process	3	3.0241	0.0723058
GO:0008406	gonad development	3	3.0241	0.0723058
GO:0010832	negative regulation of myotube differentiation	3	3.0241	0.0723058
GO:0030007	cellular potassium ion homeostasis	3	3.0241	0.0723058
GO:0030553	cGMP binding	3	3.0241	0.0723058
GO:0031915	positive regulation of synaptic plasticity	3	3.0241	0.0723058
GO:0033691	sialic acid binding	3	3.0241	0.0723058
GO:0042119	neutrophil activation	3	3.0241	0.0723058
GO:0042805	actinin binding	3	3.0241	0.0723058
GO:0044327	dendritic spine head	3	3.0241	0.0723058
GO:0044346	fibroblast apoptotic process	3	3.0241	0.0723058
GO:0046007	negative regulation of activated T cell proliferation	3	3.0241	0.0723058
GO:0048143	astrocyte activation	3	3.0241	0.0723058
GO:0050884	neuromuscular process controlling posture	3	3.0241	0.0723058
GO:0060389	pathway-restricted SMAD protein phosphorylation	3	3.0241	0.0723058
GO:0060445	branching involved in salivary gland morphogenesis	3	3.0241	0.0723058
GO:0071318	cellular response to ATP	3	3.0241	0.0723058
GO:0099527	postsynapse to nucleus signaling pathway	3	3.0241	0.0723058
GO:1901386	negative regulation of voltage-gated calcium channel activity	3	3.0241	0.0723058
GO:0006814	sodium ion transport	10	1.68005	0.0732463
GO:0002071	glandular epithelial cell maturation	2	4.32014	0.0734799
GO:0002138	retinoic acid biosynthetic process	2	4.32014	0.0734799
GO:0003176	aortic valve development	2	4.32014	0.0734799
GO:0003337	mesenchymal to epithelial transition involved in metanephros morphogenesis	2	4.32014	0.0734799
GO:0005223	intracellular cGMP-activated cation channel activity	2	4.32014	0.0734799
GO:0005283	amino acid:sodium symporter activity	2	4.32014	0.0734799
GO:0005861	troponin complex	2	4.32014	0.0734799
GO:0006248	CMP catabolic process	2	4.32014	0.0734799
GO:0006531	aspartate metabolic process	2	4.32014	0.0734799
GO:0006563	L-serine metabolic process	2	4.32014	0.0734799
GO:0006690	icosanoid metabolic process	2	4.32014	0.0734799
GO:0006729	tetrahydrobiopterin biosynthetic process	2	4.32014	0.0734799
GO:0008106	alcohol dehydrogenase (NADP+) activity	2	4.32014	0.0734799
GO:0008356	asymmetric cell division	2	4.32014	0.0734799
GO:0010385	double-stranded methylated DNA binding	2	4.32014	0.0734799
GO:0010815	bradykinin catabolic process	2	4.32014	0.0734799
GO:0014050	negative regulation of glutamate secretion	2	4.32014	0.0734799
GO:0014061	regulation of norepinephrine secretion	2	4.32014	0.0734799
GO:0016151	nickel cation binding	2	4.32014	0.0734799
GO:0019439	aromatic compound catabolic process	2	4.32014	0.0734799
GO:0019966	interleukin-1 binding	2	4.32014	0.0734799
GO:0021828	gonadotrophin-releasing hormone neuronal migration to the hypothalamus	2	4.32014	0.0734799
GO:0022898	regulation of transmembrane transporter activity	2	4.32014	0.0734799
GO:0031664	regulation of lipopolysaccharide-mediated signaling pathway	2	4.32014	0.0734799
GO:0031727	CCR2 chemokine receptor binding	2	4.32014	0.0734799
GO:0032289	central nervous system myelin formation	2	4.32014	0.0734799
GO:0032364	cellular oxygen homeostasis	2	4.32014	0.0734799
GO:0032713	negative regulation of interleukin-4 production	2	4.32014	0.0734799
GO:0032747	positive regulation of interleukin-23 production	2	4.32014	0.0734799
GO:0033631	cell-cell adhesion mediated by integrin	2	4.32014	0.0734799
GO:0038138	ERBB4-ERBB4 signaling pathway	2	4.32014	0.0734799
GO:0042490	mechanoreceptor differentiation	2	4.32014	0.0734799
GO:0042713	sperm ejaculation	2	4.32014	0.0734799
GO:0043262	ADP phosphatase activity	2	4.32014	0.0734799
GO:0043576	regulation of respiratory gaseous exchange	2	4.32014	0.0734799
GO:0044292	dendrite terminus	2	4.32014	0.0734799
GO:0044307	dendritic branch	2	4.32014	0.0734799
GO:0045630	positive regulation of T-helper 2 cell differentiation	2	4.32014	0.0734799
GO:0045876	positive regulation of sister chromatid cohesion	2	4.32014	0.0734799
GO:0046050	UMP catabolic process	2	4.32014	0.0734799
GO:0046079	dUMP catabolic process	2	4.32014	0.0734799
GO:0046826	negative regulation of protein export from nucleus	2	4.32014	0.0734799
GO:0048842	positive regulation of axon extension involved in axon guidance	2	4.32014	0.0734799
GO:0048935	peripheral nervous system neuron development	2	4.32014	0.0734799
GO:0051045	negative regulation of membrane protein ectodomain proteolysis	2	4.32014	0.0734799
GO:0051058	negative regulation of small GTPase mediated signal transduction	2	4.32014	0.0734799
GO:0051388	positive regulation of neurotrophin TRK receptor signaling pathway	2	4.32014	0.0734799
GO:0051798	positive regulation of hair follicle development	2	4.32014	0.0734799
GO:0051971	positive regulation of transmission of nerve impulse	2	4.32014	0.0734799
GO:0051988	regulation of attachment of spindle microtubules to kinetochore	2	4.32014	0.0734799
GO:0070670	response to interleukin-4	2	4.32014	0.0734799
GO:0070945	neutrophil-mediated killing of gram-negative bacterium	2	4.32014	0.0734799
GO:0071322	cellular response to carbohydrate stimulus	2	4.32014	0.0734799
GO:0072126	positive regulation of glomerular mesangial cell proliferation	2	4.32014	0.0734799
GO:0072675	osteoclast fusion	2	4.32014	0.0734799
GO:0072719	cellular response to cisplatin	2	4.32014	0.0734799
GO:0098591	external side of apical plasma membrane	2	4.32014	0.0734799
GO:0106256	hydroperoxy icosatetraenoate dehydratase activity	2	4.32014	0.0734799
GO:0140013	meiotic nuclear division	2	4.32014	0.0734799
GO:1900122	positive regulation of receptor binding	2	4.32014	0.0734799
GO:1900748	positive regulation of vascular endothelial growth factor signaling pathway	2	4.32014	0.0734799
GO:1901165	positive regulation of trophoblast cell migration	2	4.32014	0.0734799
GO:1901480	oleate transmembrane transporter activity	2	4.32014	0.0734799
GO:1901841	regulation of high voltage-gated calcium channel activity	2	4.32014	0.0734799
GO:1903243	negative regulation of cardiac muscle hypertrophy in response to stress	2	4.32014	0.0734799
GO:1903598	positive regulation of gap junction assembly	2	4.32014	0.0734799
GO:0006351	DNA-templated transcription	13	1.56005	0.073539
GO:0097421	liver regeneration	8	1.80543	0.0737286
GO:1904115	axon cytoplasm	8	1.80543	0.0737286
GO:0017046	peptide hormone binding	6	2.01607	0.0744013
GO:0030968	endoplasmic reticulum unfolded protein response	6	2.01607	0.0744013
GO:0050790	regulation of catalytic activity	6	2.01607	0.0744013
GO:1903078	positive regulation of protein localization to plasma membrane	7	1.89006	0.0748953
GO:0051607	defense response to virus	21	1.39881	0.0752794
GO:0043010	camera-type eye development	9	1.72259	0.0763307
GO:0006955	immune response	19	1.42222	0.0769568
GO:0005546	phosphatidylinositol-4,5-bisphosphate binding	10	1.66159	0.0776635
GO:0005884	actin filament	10	1.66159	0.0776635
GO:0005790	smooth endoplasmic reticulum	5	2.16007	0.078426
GO:0030325	adrenal gland development	5	2.16007	0.078426
GO:0042113	B cell activation	5	2.16007	0.078426
GO:0043113	receptor clustering	5	2.16007	0.078426
GO:0051928	positive regulation of calcium ion transport	5	2.16007	0.078426
GO:0060325	face morphogenesis	5	2.16007	0.078426
GO:1990138	neuron projection extension	5	2.16007	0.078426
GO:0008076	voltage-gated potassium channel complex	8	1.77888	0.0789646
GO:0048678	response to axon injury	8	1.77888	0.0789646
GO:0050660	flavin adenine dinucleotide binding	8	1.77888	0.0789646
GO:0004602	glutathione peroxidase activity	4	2.41928	0.0794633
GO:0031116	positive regulation of microtubule polymerization	4	2.41928	0.0794633
GO:0031668	cellular response to extracellular stimulus	4	2.41928	0.0794633
GO:0032874	positive regulation of stress-activated MAPK cascade	4	2.41928	0.0794633
GO:0033197	response to vitamin E	4	2.41928	0.0794633
GO:0055010	ventricular cardiac muscle tissue morphogenesis	4	2.41928	0.0794633
GO:0010243	response to organonitrogen compound	7	1.8569	0.0807567
GO:0014704	intercalated disc	7	1.8569	0.0807567
GO:0005504	fatty acid binding	6	1.97224	0.0810141
GO:0005547	phosphatidylinositol-3,4,5-trisphosphate binding	6	1.97224	0.0810141
GO:0030501	positive regulation of bone mineralization	6	1.97224	0.0810141
GO:0042169	SH2 domain binding	6	1.97224	0.0810141
GO:0048015	phosphatidylinositol-mediated signaling	6	1.97224	0.0810141
GO:0001938	positive regulation of endothelial cell proliferation	9	1.70106	0.0812236
GO:0043565	sequence-specific DNA binding	36	1.27182	0.0821796
GO:0002244	hematopoietic progenitor cell differentiation	11	1.59928	0.0823925
GO:0030855	epithelial cell differentiation	11	1.59928	0.0823925
GO:0071346	cellular response to type II interferon	14	1.50133	0.0834691
GO:0006869	lipid transport	8	1.7531	0.0844164
GO:0004029	aldehyde dehydrogenase (NAD+) activity	3	2.83509	0.0847796
GO:0004698	calcium-dependent protein kinase C activity	3	2.83509	0.0847796
GO:0006691	leukotriene metabolic process	3	2.83509	0.0847796
GO:0008154	actin polymerization or depolymerization	3	2.83509	0.0847796
GO:0010614	negative regulation of cardiac muscle hypertrophy	3	2.83509	0.0847796
GO:0019229	regulation of vasoconstriction	3	2.83509	0.0847796
GO:0030322	stabilization of membrane potential	3	2.83509	0.0847796
GO:0030857	negative regulation of epithelial cell differentiation	3	2.83509	0.0847796
GO:0032835	glomerulus development	3	2.83509	0.0847796
GO:0035254	glutamate receptor binding	3	2.83509	0.0847796
GO:0042698	ovulation cycle	3	2.83509	0.0847796
GO:0045060	negative thymic T cell selection	3	2.83509	0.0847796
GO:0045744	negative regulation of G protein-coupled receptor signaling pathway	3	2.83509	0.0847796
GO:0048485	sympathetic nervous system development	3	2.83509	0.0847796
GO:0051450	myoblast proliferation	3	2.83509	0.0847796
GO:0061049	cell growth involved in cardiac muscle cell development	3	2.83509	0.0847796
GO:0071880	adenylate cyclase-activating adrenergic receptor signaling pathway	3	2.83509	0.0847796
GO:0097449	astrocyte projection	3	2.83509	0.0847796
GO:1902287	semaphorin-plexin signaling pathway involved in axon guidance	3	2.83509	0.0847796
GO:0006006	glucose metabolic process	9	1.68005	0.0863017
GO:0001958	endochondral ossification	5	2.10007	0.0863615
GO:0008045	motor neuron axon guidance	5	2.10007	0.0863615
GO:0007566	embryo implantation	7	1.82489	0.0868754
GO:0097009	energy homeostasis	6	1.93028	0.0879437
GO:0001702	gastrulation with mouth forming second	4	2.32623	0.0892231
GO:0008016	regulation of heart contraction	4	2.32623	0.0892231
GO:0010460	positive regulation of heart rate	4	2.32623	0.0892231
GO:0016079	synaptic vesicle exocytosis	4	2.32623	0.0892231
GO:0030318	melanocyte differentiation	4	2.32623	0.0892231
GO:0030517	negative regulation of axon extension	4	2.32623	0.0892231
GO:0031683	G-protein beta/gamma-subunit complex binding	4	2.32623	0.0892231
GO:0035591	signaling adaptor activity	4	2.32623	0.0892231
GO:0043167	ion binding	4	2.32623	0.0892231
GO:0043537	negative regulation of blood vessel endothelial cell migration	4	2.32623	0.0892231
GO:0050860	negative regulation of T cell receptor signaling pathway	4	2.32623	0.0892231
GO:0097202	activation of cysteine-type endopeptidase activity	4	2.32623	0.0892231
GO:0000976	transcription cis-regulatory region binding	23	1.34795	0.0892752
GO:0071805	potassium ion transmembrane transport	12	1.53768	0.0903771
GO:0000922	spindle pole	14	1.48033	0.0911601
GO:0060326	cell chemotaxis	9	1.65957	0.0915646
GO:0098982	GABA-ergic synapse	13	1.50051	0.0931018
GO:0001960	negative regulation of cytokine-mediated signaling pathway	2	3.78012	0.0937849
GO:0002232	leukocyte chemotaxis involved in inflammatory response	2	3.78012	0.0937849
GO:0002320	lymphoid progenitor cell differentiation	2	3.78012	0.0937849
GO:0004022	alcohol dehydrogenase (NAD+) activity	2	3.78012	0.0937849
GO:0006249	dCMP catabolic process	2	3.78012	0.0937849
GO:0006930	substrate-dependent cell migration, cell extension	2	3.78012	0.0937849
GO:0007158	neuron cell-cell adhesion	2	3.78012	0.0937849
GO:0007207	phospholipase C-activating G protein-coupled acetylcholine receptor signaling pathway	2	3.78012	0.0937849
GO:0008091	spectrin	2	3.78012	0.0937849
GO:0008186	ATP-dependent activity, acting on RNA	2	3.78012	0.0937849
GO:0009134	nucleoside diphosphate catabolic process	2	3.78012	0.0937849
GO:0010883	regulation of lipid storage	2	3.78012	0.0937849
GO:0010894	negative regulation of steroid biosynthetic process	2	3.78012	0.0937849
GO:0014042	positive regulation of neuron maturation	2	3.78012	0.0937849
GO:0015085	calcium ion transmembrane transporter activity	2	3.78012	0.0937849
GO:0016176	superoxide-generating NADPH oxidase activator activity	2	3.78012	0.0937849
GO:0018879	biphenyl metabolic process	2	3.78012	0.0937849
GO:0022602	ovulation cycle process	2	3.78012	0.0937849
GO:0023052	signaling	2	3.78012	0.0937849
GO:0030299	intestinal cholesterol absorption	2	3.78012	0.0937849
GO:0031256	leading edge membrane	2	3.78012	0.0937849
GO:0031346	positive regulation of cell projection organization	2	3.78012	0.0937849
GO:0032059	bleb	2	3.78012	0.0937849
GO:0032354	response to follicle-stimulating hormone	2	3.78012	0.0937849
GO:0032466	negative regulation of cytokinesis	2	3.78012	0.0937849
GO:0032483	regulation of Rab protein signal transduction	2	3.78012	0.0937849
GO:0032682	negative regulation of chemokine production	2	3.78012	0.0937849
GO:0032836	glomerular basement membrane development	2	3.78012	0.0937849
GO:0036305	ameloblast differentiation	2	3.78012	0.0937849
GO:0038134	ERBB2-EGFR signaling pathway	2	3.78012	0.0937849
GO:0042117	monocyte activation	2	3.78012	0.0937849
GO:0043184	vascular endothelial growth factor receptor 2 binding	2	3.78012	0.0937849
GO:0045589	regulation of regulatory T cell differentiation	2	3.78012	0.0937849
GO:0045602	negative regulation of endothelial cell differentiation	2	3.78012	0.0937849
GO:0045823	positive regulation of heart contraction	2	3.78012	0.0937849
GO:0045835	negative regulation of meiotic nuclear division	2	3.78012	0.0937849
GO:0046038	GMP catabolic process	2	3.78012	0.0937849
GO:0046655	folic acid metabolic process	2	3.78012	0.0937849
GO:0048570	notochord morphogenesis	2	3.78012	0.0937849
GO:0048788	cytoskeleton of presynaptic active zone	2	3.78012	0.0937849
GO:0050691	regulation of defense response to virus by host	2	3.78012	0.0937849
GO:0050693	LBD domain binding	2	3.78012	0.0937849
GO:0050859	negative regulation of B cell receptor signaling pathway	2	3.78012	0.0937849
GO:0051155	positive regulation of striated muscle cell differentiation	2	3.78012	0.0937849
GO:0060396	growth hormone receptor signaling pathway	2	3.78012	0.0937849
GO:0060428	lung epithelium development	2	3.78012	0.0937849
GO:0060485	mesenchyme development	2	3.78012	0.0937849
GO:0060561	apoptotic process involved in morphogenesis	2	3.78012	0.0937849
GO:0060613	fat pad development	2	3.78012	0.0937849
GO:0070447	positive regulation of oligodendrocyte progenitor proliferation	2	3.78012	0.0937849
GO:0070508	cholesterol import	2	3.78012	0.0937849
GO:0071248	cellular response to metal ion	2	3.78012	0.0937849
GO:0071253	connexin binding	2	3.78012	0.0937849
GO:0071284	cellular response to lead ion	2	3.78012	0.0937849
GO:0071455	cellular response to hyperoxia	2	3.78012	0.0937849
GO:0072574	hepatocyte proliferation	2	3.78012	0.0937849
GO:0090556	phosphatidylserine floppase activity	2	3.78012	0.0937849
GO:0090571	RNA polymerase II transcription repressor complex	2	3.78012	0.0937849
GO:0097107	postsynaptic density assembly	2	3.78012	0.0937849
GO:0097180	serine protease inhibitor complex	2	3.78012	0.0937849
GO:0097199	cysteine-type endopeptidase activity involved in apoptotic signaling pathway	2	3.78012	0.0937849
GO:0150037	regulation of calcium-dependent activation of synaptic vesicle fusion	2	3.78012	0.0937849
GO:1901558	response to metformin	2	3.78012	0.0937849
GO:1902108	regulation of mitochondrial membrane permeability involved in apoptotic process	2	3.78012	0.0937849
GO:1904894	positive regulation of receptor signaling pathway via STAT	2	3.78012	0.0937849
GO:1904951	positive regulation of establishment of protein localization	2	3.78012	0.0937849
GO:1905461	positive regulation of vascular associated smooth muscle cell apoptotic process	2	3.78012	0.0937849
GO:1990646	cellular response to prolactin	2	3.78012	0.0937849
GO:2000434	regulation of protein neddylation	2	3.78012	0.0937849
GO:2000480	negative regulation of cAMP-dependent protein kinase activity	2	3.78012	0.0937849
GO:2000543	positive regulation of gastrulation	2	3.78012	0.0937849
GO:2000726	negative regulation of cardiac muscle cell differentiation	2	3.78012	0.0937849
GO:0030016	myofibril	6	1.89006	0.0951865
GO:0042789	mRNA transcription by RNA polymerase II	6	1.89006	0.0951865
GO:0060079	excitatory postsynaptic potential	6	1.89006	0.0951865
GO:0042981	regulation of apoptotic process	19	1.3812	0.095746
GO:0006935	chemotaxis	9	1.63957	0.0970117
GO:0001216	DNA-binding transcription activator activity	3	2.66832	0.0980939
GO:0002456	T cell mediated immunity	3	2.66832	0.0980939
GO:0005869	dynactin complex	3	2.66832	0.0980939
GO:0006937	regulation of muscle contraction	3	2.66832	0.0980939
GO:0009750	response to fructose	3	2.66832	0.0980939
GO:0015701	bicarbonate transport	3	2.66832	0.0980939
GO:0016322	neuron remodeling	3	2.66832	0.0980939
GO:0030851	granulocyte differentiation	3	2.66832	0.0980939
GO:0034698	response to gonadotropin	3	2.66832	0.0980939
GO:0035418	protein localization to synapse	3	2.66832	0.0980939
GO:0035865	cellular response to potassium ion	3	2.66832	0.0980939
GO:0043268	positive regulation of potassium ion transport	3	2.66832	0.0980939
GO:0050732	negative regulation of peptidyl-tyrosine phosphorylation	3	2.66832	0.0980939
GO:0070498	interleukin-1-mediated signaling pathway	3	2.66832	0.0980939
GO:0098662	inorganic cation transmembrane transport	3	2.66832	0.0980939
GO:2000310	regulation of NMDA receptor activity	3	2.66832	0.0980939
GO:0005783	endoplasmic reticulum	87	1.14689	0.0983938
GO:0005938	cell cortex	18	1.38862	0.098954
GO:0001774	microglial cell activation	4	2.24007	0.0995274
GO:0007205	protein kinase C-activating G protein-coupled receptor signaling pathway	4	2.24007	0.0995274
GO:0019897	extrinsic component of plasma membrane	4	2.24007	0.0995274
GO:0042157	lipoprotein metabolic process	4	2.24007	0.0995274
GO:0048844	artery morphogenesis	4	2.24007	0.0995274
GO:0055001	muscle cell development	4	2.24007	0.0995274
GO:0060045	positive regulation of cardiac muscle cell proliferation	4	2.24007	0.0995274
GO:0070064	proline-rich region binding	4	2.24007	0.0995274
GO:0008630	intrinsic apoptotic signaling pathway in response to DNA damage	7	1.76406	0.0998777
GO:0046427	positive regulation of receptor signaling pathway via JAK-STAT	7	1.76406	0.0998777
GO:0008286	insulin receptor signaling pathway	8	1.68005	0.102059
GO:0097060	synaptic membrane	8	1.68005	0.102059
GO:0005882	intermediate filament	9	1.62005	0.102642
GO:0007026	negative regulation of microtubule depolymerization	5	1.98954	0.103431
GO:0010667	negative regulation of cardiac muscle cell apoptotic process	5	1.98954	0.103431
GO:0051924	regulation of calcium ion transport	5	1.98954	0.103431
GO:0071773	cellular response to BMP stimulus	5	1.98954	0.103431
GO:0051649	establishment of localization in cell	18	1.37459	0.106201
GO:0030182	neuron differentiation	23	1.31732	0.107461
GO:0030900	forebrain development	10	1.55881	0.107559
GO:0016491	oxidoreductase activity	14	1.44005	0.107828
GO:0044325	transmembrane transporter binding	14	1.44005	0.107828
GO:0008542	visual learning	8	1.65704	0.108364
GO:0033674	positive regulation of kinase activity	8	1.65704	0.108364
GO:0050728	negative regulation of inflammatory response	12	1.48726	0.108829
GO:0007605	sensory perception of sound	15	1.41755	0.108903
GO:0002021	response to dietary excess	4	2.16007	0.110354
GO:0003009	skeletal muscle contraction	4	2.16007	0.110354
GO:0004181	metallocarboxypeptidase activity	4	2.16007	0.110354
GO:0015276	ligand-gated ion channel activity	4	2.16007	0.110354
GO:0030279	negative regulation of ossification	4	2.16007	0.110354
GO:0045088	regulation of innate immune response	4	2.16007	0.110354
GO:0051537	2 iron, 2 sulfur cluster binding	4	2.16007	0.110354
GO:0006082	organic acid metabolic process	6	1.81446	0.110592
GO:0010718	positive regulation of epithelial to mesenchymal transition	6	1.81446	0.110592
GO:0042307	positive regulation of protein import into nucleus	6	1.81446	0.110592
GO:0043407	negative regulation of MAP kinase activity	6	1.81446	0.110592
GO:0140677	molecular function activator activity	6	1.81446	0.110592
GO:0001709	cell fate determination	3	2.52008	0.112187
GO:0003279	cardiac septum development	3	2.52008	0.112187
GO:0004180	carboxypeptidase activity	3	2.52008	0.112187
GO:0007494	midgut development	3	2.52008	0.112187
GO:0007512	adult heart development	3	2.52008	0.112187
GO:0010812	negative regulation of cell-substrate adhesion	3	2.52008	0.112187
GO:0010954	positive regulation of protein processing	3	2.52008	0.112187
GO:0016004	phospholipase activator activity	3	2.52008	0.112187
GO:0030194	positive regulation of blood coagulation	3	2.52008	0.112187
GO:0032794	GTPase activating protein binding	3	2.52008	0.112187
GO:0042574	retinal metabolic process	3	2.52008	0.112187
GO:0045591	positive regulation of regulatory T cell differentiation	3	2.52008	0.112187
GO:0045793	positive regulation of cell size	3	2.52008	0.112187
GO:0048599	oocyte development	3	2.52008	0.112187
GO:0048712	negative regulation of astrocyte differentiation	3	2.52008	0.112187
GO:0050847	progesterone receptor signaling pathway	3	2.52008	0.112187
GO:0051055	negative regulation of lipid biosynthetic process	3	2.52008	0.112187
GO:0070365	hepatocyte differentiation	3	2.52008	0.112187
GO:0099565	chemical synaptic transmission, postsynaptic	3	2.52008	0.112187
GO:0140326	ATPase-coupled intramembrane lipid transporter activity	3	2.52008	0.112187
GO:0006641	triglyceride metabolic process	5	1.93852	0.112546
GO:0030534	adult behavior	5	1.93852	0.112546
GO:0005635	nuclear envelope	19	1.34878	0.113462
GO:0008270	zinc ion binding	60	1.17062	0.113847
GO:0001776	leukocyte homeostasis	2	3.36011	0.115458
GO:0001915	negative regulation of T cell mediated cytotoxicity	2	3.36011	0.115458
GO:0001955	blood vessel maturation	2	3.36011	0.115458
GO:0002029	desensitization of G protein-coupled receptor signaling pathway	2	3.36011	0.115458
GO:0002116	semaphorin receptor complex	2	3.36011	0.115458
GO:0002314	germinal center B cell differentiation	2	3.36011	0.115458
GO:0002752	cell surface pattern recognition receptor signaling pathway	2	3.36011	0.115458
GO:0003179	heart valve morphogenesis	2	3.36011	0.115458
GO:0003183	mitral valve morphogenesis	2	3.36011	0.115458
GO:0003283	atrial septum development	2	3.36011	0.115458
GO:0003376	sphingosine-1-phosphate receptor signaling pathway	2	3.36011	0.115458
GO:0003810	protein-glutamine gamma-glutamyltransferase activity	2	3.36011	0.115458
GO:0004382	GDP phosphatase activity	2	3.36011	0.115458
GO:0004862	cAMP-dependent protein kinase inhibitor activity	2	3.36011	0.115458
GO:0006196	AMP catabolic process	2	3.36011	0.115458
GO:0008343	adult feeding behavior	2	3.36011	0.115458
GO:0008603	cAMP-dependent protein kinase regulator activity	2	3.36011	0.115458
GO:0010594	regulation of endothelial cell migration	2	3.36011	0.115458
GO:0014047	glutamate secretion	2	3.36011	0.115458
GO:0014808	release of sequestered calcium ion into cytosol by sarcoplasmic reticulum	2	3.36011	0.115458
GO:0014832	urinary bladder smooth muscle contraction	2	3.36011	0.115458
GO:0015349	thyroid hormone transmembrane transporter activity	2	3.36011	0.115458
GO:0017110	nucleoside diphosphate phosphatase activity	2	3.36011	0.115458
GO:0019724	B cell mediated immunity	2	3.36011	0.115458
GO:0019865	immunoglobulin binding	2	3.36011	0.115458
GO:0030055	cell-substrate junction	2	3.36011	0.115458
GO:0030056	hemidesmosome	2	3.36011	0.115458
GO:0030070	insulin processing	2	3.36011	0.115458
GO:0030185	nitric oxide transport	2	3.36011	0.115458
GO:0030314	junctional membrane complex	2	3.36011	0.115458
GO:0032926	negative regulation of activin receptor signaling pathway	2	3.36011	0.115458
GO:0032964	collagen biosynthetic process	2	3.36011	0.115458
GO:0034774	secretory granule lumen	2	3.36011	0.115458
GO:0035148	tube formation	2	3.36011	0.115458
GO:0035630	bone mineralization involved in bone maturation	2	3.36011	0.115458
GO:0035814	negative regulation of renal sodium excretion	2	3.36011	0.115458
GO:0036302	atrioventricular canal development	2	3.36011	0.115458
GO:0038063	collagen-activated tyrosine kinase receptor signaling pathway	2	3.36011	0.115458
GO:0038094	Fc-gamma receptor signaling pathway	2	3.36011	0.115458
GO:0042270	protection from natural killer cell mediated cytotoxicity	2	3.36011	0.115458
GO:0042492	gamma-delta T cell differentiation	2	3.36011	0.115458
GO:0042584	chromaffin granule membrane	2	3.36011	0.115458
GO:0044539	long-chain fatty acid import into cell	2	3.36011	0.115458
GO:0044806	G-quadruplex DNA unwinding	2	3.36011	0.115458
GO:0045134	UDP phosphatase activity	2	3.36011	0.115458
GO:0046010	positive regulation of circadian sleep/wake cycle, non-REM sleep	2	3.36011	0.115458
GO:0046055	dGMP catabolic process	2	3.36011	0.115458
GO:0046641	positive regulation of alpha-beta T cell proliferation	2	3.36011	0.115458
GO:0046653	tetrahydrofolate metabolic process	2	3.36011	0.115458
GO:0047499	calcium-independent phospholipase A2 activity	2	3.36011	0.115458
GO:0048023	positive regulation of melanin biosynthetic process	2	3.36011	0.115458
GO:0048406	nerve growth factor binding	2	3.36011	0.115458
GO:0048672	positive regulation of collateral sprouting	2	3.36011	0.115458
GO:0048733	sebaceous gland development	2	3.36011	0.115458
GO:0050869	negative regulation of B cell activation	2	3.36011	0.115458
GO:0050897	cobalt ion binding	2	3.36011	0.115458
GO:0050996	positive regulation of lipid catabolic process	2	3.36011	0.115458
GO:0051639	actin filament network formation	2	3.36011	0.115458
GO:0055009	atrial cardiac muscle tissue morphogenesis	2	3.36011	0.115458
GO:0060055	angiogenesis involved in wound healing	2	3.36011	0.115458
GO:0061312	BMP signaling pathway involved in heart development	2	3.36011	0.115458
GO:0061370	testosterone biosynthetic process	2	3.36011	0.115458
GO:0061820	telomeric D-loop disassembly	2	3.36011	0.115458
GO:0070573	metallodipeptidase activity	2	3.36011	0.115458
GO:0070831	basement membrane assembly	2	3.36011	0.115458
GO:0071378	cellular response to growth hormone stimulus	2	3.36011	0.115458
GO:0071705	nitrogen compound transport	2	3.36011	0.115458
GO:0071864	positive regulation of cell proliferation in bone marrow	2	3.36011	0.115458
GO:0072577	endothelial cell apoptotic process	2	3.36011	0.115458
GO:0097402	neuroblast migration	2	3.36011	0.115458
GO:0097433	dense body	2	3.36011	0.115458
GO:0097441	basal dendrite	2	3.36011	0.115458
GO:0098712	L-glutamate import across plasma membrane	2	3.36011	0.115458
GO:0098882	structural constituent of presynaptic active zone	2	3.36011	0.115458
GO:0099626	voltage-gated calcium channel activity involved in regulation of presynaptic cytosolic calcium levels	2	3.36011	0.115458
GO:0150077	regulation of neuroinflammatory response	2	3.36011	0.115458
GO:0150079	negative regulation of neuroinflammatory response	2	3.36011	0.115458
GO:1903955	positive regulation of protein targeting to mitochondrion	2	3.36011	0.115458
GO:1904783	positive regulation of NMDA glutamate receptor activity	2	3.36011	0.115458
GO:2000049	positive regulation of cell-cell adhesion mediated by cadherin	2	3.36011	0.115458
GO:2000553	positive regulation of T-helper 2 cell cytokine production	2	3.36011	0.115458
GO:2000969	positive regulation of AMPA receptor activity	2	3.36011	0.115458
GO:0005856	cytoskeleton	36	1.22875	0.117237
GO:0016311	dephosphorylation	6	1.77888	0.118743
GO:0019933	cAMP-mediated signaling	6	1.77888	0.118743
GO:0043124	negative regulation of I-kappaB kinase/NF-kappaB signaling	6	1.77888	0.118743
GO:0009749	response to glucose	10	1.52732	0.118806
GO:0043621	protein self-association	9	1.56419	0.12062
GO:0003007	heart morphogenesis	7	1.68005	0.121249
GO:0005507	copper ion binding	7	1.68005	0.121249
GO:0010942	positive regulation of cell death	8	1.61285	0.121597
GO:0016042	lipid catabolic process	8	1.61285	0.121597
GO:0017147	Wnt-protein binding	4	2.08558	0.12168
GO:0030658	transport vesicle membrane	4	2.08558	0.12168
GO:0034142	toll-like receptor 4 signaling pathway	4	2.08558	0.12168
GO:0045721	negative regulation of gluconeogenesis	4	2.08558	0.12168
GO:0045824	negative regulation of innate immune response	4	2.08558	0.12168
GO:0070063	RNA polymerase binding	4	2.08558	0.12168
GO:0098992	neuronal dense core vesicle	4	2.08558	0.12168
GO:1901223	negative regulation of NIK/NF-kappaB signaling	4	2.08558	0.12168
GO:0005903	brush border	11	1.48505	0.121889
GO:0006812	cation transport	5	1.89006	0.122032
GO:0016459	myosin complex	5	1.89006	0.122032
GO:0090575	RNA polymerase II transcription regulator complex	12	1.45157	0.124011
GO:0045296	cadherin binding	9	1.54641	0.126969
GO:0001046	core promoter sequence-specific DNA binding	3	2.38745	0.126994
GO:0001953	negative regulation of cell-matrix adhesion	3	2.38745	0.126994
GO:0003688	DNA replication origin binding	3	2.38745	0.126994
GO:0008081	phosphoric diester hydrolase activity	3	2.38745	0.126994
GO:0015804	neutral amino acid transport	3	2.38745	0.126994
GO:0019395	fatty acid oxidation	3	2.38745	0.126994
GO:0030050	vesicle transport along actin filament	3	2.38745	0.126994
GO:0030539	male genitalia development	3	2.38745	0.126994
GO:0032228	regulation of synaptic transmission, GABAergic	3	2.38745	0.126994
GO:0034122	negative regulation of toll-like receptor signaling pathway	3	2.38745	0.126994
GO:0035563	positive regulation of chromatin binding	3	2.38745	0.126994
GO:0045667	regulation of osteoblast differentiation	3	2.38745	0.126994
GO:0050135	NAD(P)+ nucleosidase activity	3	2.38745	0.126994
GO:0050918	positive chemotaxis	3	2.38745	0.126994
GO:0060009	Sertoli cell development	3	2.38745	0.126994
GO:0060134	prepulse inhibition	3	2.38745	0.126994
GO:0060340	positive regulation of type I interferon-mediated signaling pathway	3	2.38745	0.126994
GO:0061809	NAD+ nucleotidase, cyclic ADP-ribose generating	3	2.38745	0.126994
GO:0070207	protein homotrimerization	3	2.38745	0.126994
GO:0071287	cellular response to manganese ion	3	2.38745	0.126994
GO:1903204	negative regulation of oxidative stress-induced neuron death	3	2.38745	0.126994
GO:2001171	positive regulation of ATP biosynthetic process	3	2.38745	0.126994
GO:0004879	nuclear receptor activity	6	1.74467	0.127184
GO:0005254	chloride channel activity	6	1.74467	0.127184
GO:0048706	embryonic skeletal system development	6	1.74467	0.127184
GO:0071392	cellular response to estradiol stimulus	6	1.74467	0.127184
GO:0055085	transmembrane transport	11	1.47191	0.127462
GO:0006919	activation of cysteine-type endopeptidase activity involved in apoptotic process	8	1.59163	0.128519
GO:0045165	cell fate commitment	8	1.59163	0.128519
GO:0060021	roof of mouth development	8	1.59163	0.128519
GO:0033574	response to testosterone	7	1.6538	0.128855
GO:0030336	negative regulation of cell migration	16	1.35915	0.131022
GO:0001618	virus receptor activity	5	1.84396	0.131876
GO:0010035	response to inorganic substance	5	1.84396	0.131876
GO:0019955	cytokine binding	5	1.84396	0.131876
GO:0045582	positive regulation of T cell differentiation	5	1.84396	0.131876
GO:0050905	neuromuscular process	5	1.84396	0.131876
GO:0001726	ruffle	11	1.45899	0.133173
GO:0001892	embryonic placenta development	4	2.01607	0.133478
GO:0006882	cellular zinc ion homeostasis	4	2.01607	0.133478
GO:0007043	cell-cell junction assembly	4	2.01607	0.133478
GO:0007094	mitotic spindle assembly checkpoint signaling	4	2.01607	0.133478
GO:0008585	female gonad development	4	2.01607	0.133478
GO:0030507	spectrin binding	4	2.01607	0.133478
GO:0033993	response to lipid	4	2.01607	0.133478
GO:0035335	peptidyl-tyrosine dephosphorylation	4	2.01607	0.133478
GO:0043393	regulation of protein binding	4	2.01607	0.133478
GO:0043950	positive regulation of cAMP-mediated signaling	4	2.01607	0.133478
GO:0050678	regulation of epithelial cell proliferation	4	2.01607	0.133478
GO:0050804	modulation of chemical synaptic transmission	12	1.42871	0.134761
GO:0043525	positive regulation of neuron apoptotic process	8	1.57096	0.13564
GO:0010951	negative regulation of endopeptidase activity	10	1.4824	0.136844
GO:0002199	zona pellucida receptor complex	2	3.0241	0.138228
GO:0002260	lymphocyte homeostasis	2	3.0241	0.138228
GO:0003223	ventricular compact myocardium morphogenesis	2	3.0241	0.138228
GO:0003272	endocardial cushion formation	2	3.0241	0.138228
GO:0005114	type II transforming growth factor beta receptor binding	2	3.0241	0.138228
GO:0006390	mitochondrial transcription	2	3.0241	0.138228
GO:0006929	substrate-dependent cell migration	2	3.0241	0.138228
GO:0007215	glutamate receptor signaling pathway	2	3.0241	0.138228
GO:0008088	axo-dendritic transport	2	3.0241	0.138228
GO:0008239	dipeptidyl-peptidase activity	2	3.0241	0.138228
GO:0009404	toxin metabolic process	2	3.0241	0.138228
GO:0010273	detoxification of copper ion	2	3.0241	0.138228
GO:0014909	smooth muscle cell migration	2	3.0241	0.138228
GO:0015464	acetylcholine receptor activity	2	3.0241	0.138228
GO:0016303	1-phosphatidylinositol-3-kinase activity	2	3.0241	0.138228
GO:0018242	protein O-linked glycosylation via serine	2	3.0241	0.138228
GO:0019211	phosphatase activator activity	2	3.0241	0.138228
GO:0019911	structural constituent of myelin sheath	2	3.0241	0.138228
GO:0030321	transepithelial chloride transport	2	3.0241	0.138228
GO:0030836	positive regulation of actin filament depolymerization	2	3.0241	0.138228
GO:0031390	Ctf18 RFC-like complex	2	3.0241	0.138228
GO:0031960	response to corticosteroid	2	3.0241	0.138228
GO:0032287	peripheral nervous system myelin maintenance	2	3.0241	0.138228
GO:0034616	response to laminar fluid shear stress	2	3.0241	0.138228
GO:0035095	behavioral response to nicotine	2	3.0241	0.138228
GO:0035197	siRNA binding	2	3.0241	0.138228
GO:0035567	non-canonical Wnt signaling pathway	2	3.0241	0.138228
GO:0042982	amyloid precursor protein metabolic process	2	3.0241	0.138228
GO:0045179	apical cortex	2	3.0241	0.138228
GO:0045199	maintenance of epithelial cell apical/basal polarity	2	3.0241	0.138228
GO:0046322	negative regulation of fatty acid oxidation	2	3.0241	0.138228
GO:0046581	intercellular canaliculus	2	3.0241	0.138228
GO:0046890	regulation of lipid biosynthetic process	2	3.0241	0.138228
GO:0048019	receptor antagonist activity	2	3.0241	0.138228
GO:0048660	regulation of smooth muscle cell proliferation	2	3.0241	0.138228
GO:0050688	regulation of defense response to virus	2	3.0241	0.138228
GO:0051057	positive regulation of small GTPase mediated signal transduction	2	3.0241	0.138228
GO:0051428	peptide hormone receptor binding	2	3.0241	0.138228
GO:0051901	positive regulation of mitochondrial depolarization	2	3.0241	0.138228
GO:0060008	Sertoli cell differentiation	2	3.0241	0.138228
GO:0060346	bone trabecula formation	2	3.0241	0.138228
GO:0060539	diaphragm development	2	3.0241	0.138228
GO:0060586	multicellular organismal iron ion homeostasis	2	3.0241	0.138228
GO:0060710	chorio-allantoic fusion	2	3.0241	0.138228
GO:0060979	vasculogenesis involved in coronary vascular morphogenesis	2	3.0241	0.138228
GO:0061037	negative regulation of cartilage development	2	3.0241	0.138228
GO:0071467	cellular response to pH	2	3.0241	0.138228
GO:0086009	membrane repolarization	2	3.0241	0.138228
GO:0090129	positive regulation of synapse maturation	2	3.0241	0.138228
GO:0090150	establishment of protein localization to membrane	2	3.0241	0.138228
GO:0097197	tetraspanin-enriched microdomain	2	3.0241	0.138228
GO:0097470	ribbon synapse	2	3.0241	0.138228
GO:0150076	neuroinflammatory response	2	3.0241	0.138228
GO:1902732	positive regulation of chondrocyte proliferation	2	3.0241	0.138228
GO:1905274	regulation of modification of postsynaptic actin cytoskeleton	2	3.0241	0.138228
GO:1990264	peptidyl-tyrosine dephosphorylation involved in inactivation of protein kinase activity	2	3.0241	0.138228
GO:2000404	regulation of T cell migration	2	3.0241	0.138228
GO:2000727	positive regulation of cardiac muscle cell differentiation	2	3.0241	0.138228
GO:0000122	negative regulation of transcription by RNA polymerase II	78	1.13077	0.13861
GO:0005261	cation channel activity	5	1.80006	0.142064
GO:0010975	regulation of neuron projection development	5	1.80006	0.142064
GO:0032870	cellular response to hormone stimulus	5	1.80006	0.142064
GO:0055093	response to hyperoxia	5	1.80006	0.142064
GO:0009651	response to salt stress	3	2.26807	0.14245
GO:0015271	outward rectifier potassium channel activity	3	2.26807	0.14245
GO:0015813	L-glutamate transmembrane transport	3	2.26807	0.14245
GO:0019538	protein metabolic process	3	2.26807	0.14245
GO:0022010	central nervous system myelination	3	2.26807	0.14245
GO:0022617	extracellular matrix disassembly	3	2.26807	0.14245
GO:0030330	DNA damage response, signal transduction by p53 class mediator	3	2.26807	0.14245
GO:0032700	negative regulation of interleukin-17 production	3	2.26807	0.14245
GO:0033162	melanosome membrane	3	2.26807	0.14245
GO:0042445	hormone metabolic process	3	2.26807	0.14245
GO:0045987	positive regulation of smooth muscle contraction	3	2.26807	0.14245
GO:0050892	intestinal absorption	3	2.26807	0.14245
GO:0050910	detection of mechanical stimulus involved in sensory perception of sound	3	2.26807	0.14245
GO:0050998	nitric-oxide synthase binding	3	2.26807	0.14245
GO:0051010	microtubule plus-end binding	3	2.26807	0.14245
GO:0055117	regulation of cardiac muscle contraction	3	2.26807	0.14245
GO:0060996	dendritic spine development	3	2.26807	0.14245
GO:1905564	positive regulation of vascular endothelial cell proliferation	3	2.26807	0.14245
GO:0007519	skeletal muscle tissue development	8	1.55082	0.142957
GO:0008344	adult locomotory behavior	7	1.60369	0.14476
GO:0030145	manganese ion binding	7	1.60369	0.14476
GO:0042100	B cell proliferation	7	1.60369	0.14476
GO:0051289	protein homotetramerization	7	1.60369	0.14476
GO:0006821	chloride transport	6	1.68005	0.1449
GO:0007214	gamma-aminobutyric acid signaling pathway	4	1.95103	0.145721
GO:0043303	mast cell degranulation	4	1.95103	0.145721
GO:0045332	phospholipid translocation	4	1.95103	0.145721
GO:0050806	positive regulation of synaptic transmission	4	1.95103	0.145721
GO:2001238	positive regulation of extrinsic apoptotic signaling pathway	4	1.95103	0.145721
GO:0008203	cholesterol metabolic process	9	1.49543	0.147047
GO:0140297	DNA-binding transcription factor binding	17	1.3182	0.148587
GO:0034644	cellular response to UV	8	1.53119	0.150464
GO:0006629	lipid metabolic process	13	1.37459	0.151892
GO:0001824	blastocyst development	5	1.7582	0.15258
GO:0006695	cholesterol biosynthetic process	5	1.7582	0.15258
GO:0008277	regulation of G protein-coupled receptor signaling pathway	5	1.7582	0.15258
GO:0042327	positive regulation of phosphorylation	5	1.7582	0.15258
GO:0046676	negative regulation of insulin secretion	5	1.7582	0.15258
GO:0099634	postsynaptic specialization membrane	5	1.7582	0.15258
GO:2000648	positive regulation of stem cell proliferation	5	1.7582	0.15258
GO:0010977	negative regulation of neuron projection development	9	1.47918	0.154074
GO:0030512	negative regulation of transforming growth factor beta receptor signaling pathway	9	1.47918	0.154074
GO:0007595	lactation	6	1.64951	0.154159
GO:0030217	T cell differentiation	6	1.64951	0.154159
GO:0007409	axonogenesis	11	1.40954	0.157359
GO:0060548	negative regulation of cell death	11	1.40954	0.157359
GO:0009267	cellular response to starvation	8	1.51205	0.158157
GO:0019882	antigen processing and presentation	4	1.89006	0.158381
GO:0032007	negative regulation of TOR signaling	4	1.89006	0.158381
GO:0045216	cell-cell junction organization	4	1.89006	0.158381
GO:0045648	positive regulation of erythrocyte differentiation	4	1.89006	0.158381
GO:0051453	regulation of intracellular pH	4	1.89006	0.158381
GO:0051899	membrane depolarization	4	1.89006	0.158381
GO:0098632	cell-cell adhesion mediator activity	4	1.89006	0.158381
GO:0001964	startle response	3	2.16007	0.15849
GO:0002076	osteoblast development	3	2.16007	0.15849
GO:0006880	intracellular sequestering of iron ion	3	2.16007	0.15849
GO:0007062	sister chromatid cohesion	3	2.16007	0.15849
GO:0007097	nuclear migration	3	2.16007	0.15849
GO:0008134	transcription factor binding	3	2.16007	0.15849
GO:0008188	neuropeptide receptor activity	3	2.16007	0.15849
GO:0016082	synaptic vesicle priming	3	2.16007	0.15849
GO:0016836	hydro-lyase activity	3	2.16007	0.15849
GO:0030414	peptidase inhibitor activity	3	2.16007	0.15849
GO:0030889	negative regulation of B cell proliferation	3	2.16007	0.15849
GO:0035259	nuclear glucocorticoid receptor binding	3	2.16007	0.15849
GO:0035371	microtubule plus-end	3	2.16007	0.15849
GO:0035640	exploration behavior	3	2.16007	0.15849
GO:0042116	macrophage activation	3	2.16007	0.15849
GO:0045598	regulation of fat cell differentiation	3	2.16007	0.15849
GO:0045814	negative regulation of gene expression, epigenetic	3	2.16007	0.15849
GO:0046325	negative regulation of glucose import	3	2.16007	0.15849
GO:0048546	digestive tract morphogenesis	3	2.16007	0.15849
GO:0048557	embryonic digestive tract morphogenesis	3	2.16007	0.15849
GO:0051393	alpha-actinin binding	3	2.16007	0.15849
GO:0071396	cellular response to lipid	3	2.16007	0.15849
GO:1903077	negative regulation of protein localization to plasma membrane	3	2.16007	0.15849
GO:2000117	negative regulation of cysteine-type endopeptidase activity	3	2.16007	0.15849
GO:0006468	protein phosphorylation	43	1.16939	0.160585
GO:0005902	microvillus	9	1.46327	0.161263
GO:0043539	protein serine/threonine kinase activator activity	7	1.55652	0.161549
GO:0002357	defense response to tumor cell	2	2.74918	0.161858
GO:0002827	positive regulation of T-helper 1 type immune response	2	2.74918	0.161858
GO:0004383	guanylate cyclase activity	2	2.74918	0.161858
GO:0006750	glutathione biosynthetic process	2	2.74918	0.161858
GO:0006940	regulation of smooth muscle contraction	2	2.74918	0.161858
GO:0008046	axon guidance receptor activity	2	2.74918	0.161858
GO:0008140	cAMP response element binding protein binding	2	2.74918	0.161858
GO:0008253	5'-nucleotidase activity	2	2.74918	0.161858
GO:0008330	protein tyrosine/threonine phosphatase activity	2	2.74918	0.161858
GO:0009950	dorsal/ventral axis specification	2	2.74918	0.161858
GO:0010389	regulation of G2/M transition of mitotic cell cycle	2	2.74918	0.161858
GO:0010656	negative regulation of muscle cell apoptotic process	2	2.74918	0.161858
GO:0010756	positive regulation of plasminogen activation	2	2.74918	0.161858
GO:0014012	peripheral nervous system axon regeneration	2	2.74918	0.161858
GO:0015101	organic cation transmembrane transporter activity	2	2.74918	0.161858
GO:0019953	sexual reproduction	2	2.74918	0.161858
GO:0021879	forebrain neuron differentiation	2	2.74918	0.161858
GO:0030449	regulation of complement activation	2	2.74918	0.161858
GO:0030548	acetylcholine receptor regulator activity	2	2.74918	0.161858
GO:0031529	ruffle organization	2	2.74918	0.161858
GO:0032060	bleb assembly	2	2.74918	0.161858
GO:0033010	paranodal junction	2	2.74918	0.161858
GO:0033625	positive regulation of integrin activation	2	2.74918	0.161858
GO:0034405	response to fluid shear stress	2	2.74918	0.161858
GO:0034993	meiotic nuclear membrane microtubule tethering complex	2	2.74918	0.161858
GO:0035374	chondroitin sulfate binding	2	2.74918	0.161858
GO:0035497	cAMP response element binding	2	2.74918	0.161858
GO:0035900	response to isolation stress	2	2.74918	0.161858
[truncated: 3,333 more rows]
