# Supplementary material for: Peptide-based Self-adaptive Implant Coating Sequentially Regulates Bone Regeneration to Enhance Interfacial Osseointegration
Source: Research Square preprint supplement (doi:10.21203/rs.3.rs-5132912/v1), 2024-10-01
Supplement: Supplementary file 45 [file enrichment_go.xls]

groups	Tested term	pValue<0.05	pValue<0.01	qValue<0.05	qValue<0.01
S-vs-C-Down	3991	899	425	299	125
S-vs-C-Total	5332	1121	614	429	192
S-vs-C-Up	3652	696	272	99	36
