# Supplementary material for: Peptide-based Self-adaptive Implant Coating Sequentially Regulates Bone Regeneration to Enhance Interfacial Osseointegration
Source: Research Square preprint supplement (doi:10.21203/rs.3.rs-5132912/v1), 2024-10-01
Supplement: Supplementary file 49 [file 0-KEGG-Top20 all.xlsx]

## Sheet: demo_bubble_data
Term_ID	Term_description	ListHit	FoldEnrichment	p-value
rno00010	Glycolysis / Gluconeogenesis	5	0.996462	0.570114
rno00020	Citrate cycle (TCA cycle)	3	1.27049	0.423882
rno00030	Pentose phosphate pathway	1	0.451729	0.900091
rno00040	Pentose and glucuronate interconversions	4	1.54879	0.256357
rno00051	Fructose and mannose metabolism	2	0.752882	0.755681
rno00052	Galactose metabolism	2	0.846992	0.695137
rno00053	Ascorbate and aldarate metabolism	2	0.903459	0.660469
rno00061	Fatty acid biosynthesis	1	0.713257	0.767288
rno00071	Fatty acid degradation	2	0.553138	0.886041
rno00100	Steroid biosynthesis	3	2.03278	0.179679
rno00120	Primary bile acid biosynthesis	2	1.50576	0.387609
rno00130	Ubiquinone and other terpenoid-quinone biosynthesis	1	1.23199	0.569879
rno00140	Steroid hormone biosynthesis	6	0.967991	0.593641
rno00190	Oxidative phosphorylation	2	0.197838	0.999694
rno00220	Arginine biosynthesis	4	2.85303	0.0467965
rno00230	Purine metabolism	18	1.86209	0.00747396
rno00232	Caffeine metabolism	1	2.25865	0.368755
rno00240	Pyrimidine metabolism	9	2.21758	0.0182685
rno00250	Alanine, aspartate and glutamate metabolism	7	2.63509	0.0146583
rno00260	Glycine, serine and threonine metabolism	3	1.04245	0.557167
rno00270	Cysteine and methionine metabolism	4	1.06289	0.525443
rno00280	Valine, leucine and isoleucine degradation	2	0.483996	0.925965
rno00330	Arginine and proline metabolism	3	0.781839	0.748994
rno00340	Histidine metabolism	2	1.04245	0.581779
rno00350	Tyrosine metabolism	8	2.85303	0.00567561
rno00360	Phenylalanine metabolism	2	1.50576	0.387609
rno00380	Tryptophan metabolism	3	0.797169	0.736998
rno00410	beta-Alanine metabolism	4	1.74863	0.192083
rno00430	Taurine and hypotaurine metabolism	3	1.84798	0.218576
rno00470	D-Amino acid metabolism	1	2.25865	0.368755
rno00480	Glutathione metabolism	13	2.44687	0.00209307
rno00500	Starch and sucrose metabolism	1	0.423496	0.914338
rno00510	N-Glycan biosynthesis	1	0.250961	0.984268
rno00512	Mucin type O-glycan biosynthesis	8	3.49726	0.00144737
rno00513	Various types of N-glycan biosynthesis	1	0.307997	0.965993
rno00514	Other types of O-glycan biosynthesis	6	1.89096	0.0938948
rno00520	Amino sugar and nucleotide sugar metabolism	6	1.59434	0.171401
rno00524	Neomycin, kanamycin and gentamicin biosynthesis	1	2.71038	0.318434
rno00531	Glycosaminoglycan degradation	1	0.677594	0.784497
rno00532	Glycosaminoglycan biosynthesis - chondroitin sulfate / dermatan sulfate	2	1.29066	0.465747
rno00533	Glycosaminoglycan biosynthesis - keratan sulfate	1	0.967991	0.658352
rno00534	Glycosaminoglycan biosynthesis - heparan sulfate / heparin	1	0.564662	0.841525
rno00561	Glycerolipid metabolism	2	0.423496	0.955372
rno00562	Inositol phosphate metabolism	4	0.742569	0.797094
rno00564	Glycerophospholipid metabolism	3	0.414853	0.979191
rno00565	Ether lipid metabolism	3	0.865014	0.684471
rno00590	Arachidonic acid metabolism	7	1.17115	0.389711
rno00591	Linoleic acid metabolism	3	1.01639	0.574667
rno00592	alpha-Linolenic acid metabolism	2	1.12932	0.537674
rno00600	Sphingolipid metabolism	2	0.483996	0.925965
rno00601	Glycosphingolipid biosynthesis - lacto and neolacto series	2	0.934612	0.641981
rno00603	Glycosphingolipid biosynthesis - globo and isoglobo series	1	0.713257	0.767288
rno00604	Glycosphingolipid biosynthesis - ganglio series	1	0.903459	0.683601
rno00620	Pyruvate metabolism	4	1.17842	0.443868
rno00630	Glyoxylate and dicarboxylate metabolism	1	0.437157	0.907488
rno00640	Propanoate metabolism	1	0.437157	0.907488
rno00670	One carbon pool by folate	3	2.25865	0.142975
rno00730	Thiamine metabolism	2	1.59434	0.360427
rno00750	Vitamin B6 metabolism	2	2.71038	0.165164
rno00760	Nicotinate and nicotinamide metabolism	4	1.42651	0.307008
rno00770	Pantothenate and CoA biosynthesis	3	1.93598	0.198898
rno00785	Lipoic acid metabolism	1	0.713257	0.767288
rno00790	Folate biosynthesis	5	2.25865	0.0661148
rno00830	Retinol metabolism	10	1.5758	0.100503
rno00860	Porphyrin metabolism	2	0.63032	0.836806
rno00900	Terpenoid backbone biosynthesis	1	0.542075	0.85325
rno00910	Nitrogen metabolism	3	2.39151	0.125671
rno00920	Sulfur metabolism	1	1.35519	0.535571
rno00980	Metabolism of xenobiotics by cytochrome P450	13	2.31808	0.0034352
rno00982	Drug metabolism - cytochrome P450	16	2.97028	6.39298e-05
rno00983	Drug metabolism - other enzymes	14	1.99712	0.00952929
rno01040	Biosynthesis of unsaturated fatty acids	2	0.797169	0.726826
rno01521	EGFR tyrosine kinase inhibitor resistance	13	2.20218	0.00540469
rno01522	Endocrine resistance	9	1.29752	0.256421
rno01523	Antifolate resistance	2	0.934612	0.641981
rno01524	Platinum drug resistance	10	1.65267	0.0785495
rno02010	ABC transporters	2	0.492796	0.921203
rno03008	Ribosome biogenesis in eukaryotes	2	0.343086	0.983227
rno03010	Ribosome	1	0.0713257	1
rno03013	Nucleocytoplasmic transport	1	0.118876	0.999849
rno03015	mRNA surveillance pathway	2	0.276569	0.995339
rno03018	RNA degradation	1	0.165267	0.998191
rno03020	RNA polymerase	1	0.423496	0.914338
rno03040	Spliceosome	2	0.206899	0.999532
rno03082	ATP-dependent chromatin remodeling	5	0.564662	0.947603
rno03250	Viral life cycle - HIV-1	3	0.645328	0.853751
rno03260	Virion - Human immunodeficiency virus	2	2.0849	0.24846
rno03266	Virion - Herpesvirus	6	5.42075	0.000443131
rno03320	PPAR signaling pathway	11	1.73338	0.0506774
rno03430	Mismatch repair	1	0.615995	0.815195
rno03460	Fanconi anemia pathway	2	0.531446	0.899128
rno04010	MAPK signaling pathway	39	1.75589	0.000372378
rno04012	ErbB signaling pathway	12	1.91321	0.0215396
rno04014	Ras signaling pathway	28	1.62855	0.00696201
rno04015	Rap1 signaling pathway	24	1.52697	0.0244175
rno04020	Calcium signaling pathway	37	1.99769	3.59603e-05
rno04022	cGMP-PKG signaling pathway	29	2.31179	1.64647e-05
rno04024	cAMP signaling pathway	28	1.72478	0.00312708
rno04060	Cytokine-cytokine receptor interaction	57	2.86095	1.75836e-13
rno04061	Viral protein interaction with cytokine and cytokine receptor	23	3.66698	2.76531e-08
rno04062	Chemokine signaling pathway	33	2.47078	9.45068e-07
rno04064	NF-kappa B signaling pathway	15	2.07427	0.00521609
rno04066	HIF-1 signaling pathway	16	1.91885	0.00853086
rno04068	FoxO signaling pathway	16	1.64265	0.0332905
rno04070	Phosphatidylinositol signaling system	8	1.15335	0.391239
rno04071	Sphingolipid signaling pathway	10	1.07555	0.453415
rno04072	Phospholipase D signaling pathway	15	1.35519	0.140708
rno04080	Neuroactive ligand-receptor interaction	41	1.42468	0.0129891
rno04110	Cell cycle	12	1.04245	0.484307
rno04114	Oocyte meiosis	6	0.689079	0.876621
rno04115	p53 signaling pathway	8	1.48514	0.16837
rno04120	Ubiquitin mediated proteolysis	1	0.0941103	0.999985
rno04137	Mitophagy - animal	3	0.589212	0.892991
rno04140	Autophagy - animal	4	0.318868	0.99896
rno04141	Protein processing in endoplasmic reticulum	5	0.40333	0.995705
rno04142	Lysosome	6	0.606801	0.93719
rno04144	Endocytosis	12	0.600083	0.983279
rno04145	Phagosome	17	1.25892	0.192839
rno04146	Peroxisome	2	0.307997	0.990811
rno04150	mTOR signaling pathway	10	0.857714	0.73844
rno04151	PI3K-Akt signaling pathway	59	2.29101	9.6315e-10
rno04152	AMPK signaling pathway	15	1.62623	0.0415035
rno04210	Apoptosis	13	1.305	0.195811
rno04211	Longevity regulating pathway	9	1.35519	0.218012
rno04213	Longevity regulating pathway - multiple species	9	1.93598	0.0404515
rno04215	Apoptosis - multiple species	1	0.410663	0.920682
rno04216	Ferroptosis	6	1.9832	0.0782173
rno04217	Necroptosis	10	0.846992	0.752446
rno04218	Cellular senescence	14	1.04821	0.467834
rno04260	Cardiac muscle contraction	12	1.86922	0.025416
rno04261	Adrenergic signaling in cardiomyocytes	26	2.33344	3.79149e-05
rno04270	Vascular smooth muscle contraction	25	2.45505	2.19726e-05
rno04310	Wnt signaling pathway	15	1.18185	0.287345
rno04330	Notch signaling pathway	4	0.846992	0.705106
rno04340	Hedgehog signaling pathway	3	0.781839	0.748994
rno04350	TGF-beta signaling pathway	20	2.46398	0.000136053
rno04360	Axon guidance	18	1.3477	0.119344
rno04370	VEGF signaling pathway	8	1.86922	0.0614448
rno04371	Apelin signaling pathway	19	1.89328	0.0050819
rno04380	Osteoclast differentiation	27	2.83644	5.70789e-07
rno04390	Hippo signaling pathway	15	1.29477	0.182066
rno04392	Hippo signaling pathway - multiple species	4	1.93598	0.147819
rno04510	Focal adhesion	42	2.83174	4.2774e-10
rno04512	ECM-receptor interaction	34	5.23595	8.72523e-17
rno04514	Cell adhesion molecules	24	1.81701	0.00306144
rno04520	Adherens junction	3	0.437157	0.97206
rno04530	Tight junction	11	0.887325	0.704158
rno04540	Gap junction	9	1.40192	0.190811
rno04550	Signaling pathways regulating pluripotency of stem cells	14	1.3361	0.162983
rno04610	Complement and coagulation cascades	12	1.86922	0.025416
rno04611	Platelet activation	19	2.05989	0.00193965
rno04612	Antigen processing and presentation	6	0.956603	0.605377
rno04613	Neutrophil extracellular trap formation	27	2.03278	0.000300939
rno04614	Renin-angiotensin system	3	1.19575	0.463657
rno04620	Toll-like receptor signaling pathway	12	1.74863	0.0400828
rno04621	NOD-like receptor signaling pathway	17	1.29428	0.163903
rno04622	RIG-I-like receptor signaling pathway	4	0.874315	0.681021
rno04623	Cytosolic DNA-sensing pathway	5	1.01133	0.556661
rno04625	C-type lectin receptor signaling pathway	9	1.07935	0.456575
rno04630	JAK-STAT signaling pathway	22	1.86338	0.00327932
rno04640	Hematopoietic cell lineage	20	3.01153	6.41219e-06
rno04650	Natural killer cell mediated cytotoxicity	13	1.32462	0.181838
rno04657	IL-17 signaling pathway	21	3.09336	2.38904e-06
rno04658	Th1 and Th2 cell differentiation	4	0.615995	0.897886
rno04659	Th17 cell differentiation	6	0.781839	0.789164
rno04660	T cell receptor signaling pathway	12	1.34399	0.181002
rno04662	B cell receptor signaling pathway	11	1.88697	0.0296666
rno04664	Fc epsilon RI signaling pathway	8	1.64265	0.111207
rno04666	Fc gamma R-mediated phagocytosis	13	1.85447	0.0217829
rno04668	TNF signaling pathway	25	2.9982	4.98361e-07
rno04670	Leukocyte transendothelial migration	19	2.18208	0.000963862
rno04672	Intestinal immune network for IgA production	8	2.52128	0.0121615
rno04710	Circadian rhythm	3	1.19575	0.463657
rno04713	Circadian entrainment	17	2.37507	0.00066013
rno04714	Thermogenesis	8	0.465301	0.996567
rno04720	Long-term potentiation	7	1.43732	0.212108
rno04721	Synaptic vesicle cycle	6	1.04245	0.519669
rno04722	Neurotrophin signaling pathway	15	1.69398	0.0303281
rno04723	Retrograde endocannabinoid signaling	11	1.00723	0.535787
rno04724	Glutamatergic synapse	13	1.54539	0.0764201
rno04725	Cholinergic synapse	13	1.57299	0.0683775
rno04726	Serotonergic synapse	13	1.44405	0.114475
rno04727	GABAergic synapse	10	1.52268	0.119092
rno04728	Dopaminergic synapse	10	1.04245	0.493642
rno04730	Long-term depression	8	1.7773	0.0780777
rno04740	Olfactory transduction	9	0.0928211	1
rno04742	Taste transduction	8	1.19137	0.356888
rno04744	Phototransduction	1	0.521226	0.864109
rno04750	Inflammatory mediator regulation of TRP channels	17	2.02089	0.00401498
rno04810	Regulation of actin cytoskeleton	28	1.62855	0.00696201
rno04814	Motor proteins	19	1.35519	0.107587
rno04910	Insulin signaling pathway	11	1.08022	0.440795
rno04911	Insulin secretion	17	2.71038	0.000128301
rno04912	GnRH signaling pathway	11	1.65634	0.0663435
rno04913	Ovarian steroidogenesis	7	1.63557	0.133202
rno04914	Progesterone-mediated oocyte maturation	7	1.04245	0.51177
rno04915	Estrogen signaling pathway	13	1.31473	0.188763
rno04916	Melanogenesis	8	1.10628	0.437136
rno04917	Prolactin signaling pathway	9	1.62623	0.0994745
rno04918	Thyroid hormone synthesis	11	2.04206	0.017377
rno04919	Thyroid hormone signaling pathway	18	1.96721	0.00418977
rno04920	Adipocytokine signaling pathway	9	1.69398	0.0816065
rno04921	Oxytocin signaling pathway	19	1.67199	0.0183275
rno04922	Glucagon signaling pathway	8	1.05257	0.493818
rno04923	Regulation of lipolysis in adipocytes	12	2.85303	0.000763195
rno04924	Renin secretion	18	3.38797	3.15002e-06
rno04925	Aldosterone synthesis and secretion	16	2.25865	0.00163636
rno04926	Relaxin signaling pathway	20	2.13415	0.000954182
rno04927	Cortisol synthesis and secretion	10	1.99292	0.0265455
rno04928	Parathyroid hormone synthesis, secretion and action	10	1.29066	0.245781
rno04929	GnRH secretion	9	1.90573	0.0441276
rno04930	Type II diabetes mellitus	5	1.41165	0.278716
rno04931	Insulin resistance	14	1.74061	0.0290572
rno04932	Non-alcoholic fatty liver disease	14	1.20845	0.268524
rno04933	AGE-RAGE signaling pathway in diabetic complications	24	3.22025	2.05977e-07
rno04934	Cushing syndrome	14	1.2008	0.276312
rno04935	Growth hormone synthesis, secretion and action	13	1.50576	0.0895828
rno04936	Alcoholic liver disease	19	1.92154	0.0043137
rno04940	Type I diabetes mellitus	7	1.41587	0.223014
rno04950	Maturity onset diabetes of the young	1	0.501921	0.874166
rno04960	Aldosterone-regulated sodium reabsorption	10	3.56628	0.000317253
rno04961	Endocrine and other factor-regulated calcium reabsorption	9	2.06724	0.027828
rno04962	Vasopressin-regulated water reabsorption	4	1.26064	0.392921
rno04964	Proximal tubule bicarbonate reclamation	7	4.31196	0.000737778
rno04966	Collecting duct acid secretion	1	0.501921	0.874166
rno04970	Salivary secretion	16	2.61241	0.000313481
rno04971	Gastric acid secretion	11	1.98761	0.0209486
rno04972	Pancreatic secretion	15	1.93598	0.00985986
rno04973	Carbohydrate digestion and absorption	10	2.94606	0.00159916
rno04974	Protein digestion and absorption	22	2.89458	4.46264e-06
rno04975	Fat digestion and absorption	3	0.923992	0.640192
rno04976	Bile secretion	11	1.58586	0.0848477
rno04978	Mineral absorption	13	3.20317	0.000136878
rno04979	Cholesterol metabolism	6	1.62623	0.160534
rno05010	Alzheimer disease	22	0.770391	0.923955
rno05012	Parkinson disease	10	0.509469	0.995583
rno05014	Amyotrophic lateral sclerosis	17	0.629459	0.988226
rno05016	Huntington disease	10	0.447257	0.999254
rno05017	Spinocerebellar ataxia	11	1.04245	0.488776
rno05020	Prion disease	20	1.01133	0.513392
rno05022	Pathways of neurodegeneration - multiple diseases	29	0.830876	0.878255
rno05030	Cocaine addiction	4	1.15335	0.460578
rno05031	Amphetamine addiction	5	1.01133	0.556661
rno05032	Morphine addiction	13	1.93598	0.0156539
rno05033	Nicotine addiction	2	0.677594	0.805556
rno05034	Alcoholism	18	1.41822	0.0831922
rno05100	Bacterial invasion of epithelial cells	9	1.58399	0.11254
rno05132	Salmonella infection	22	1.1831	0.233794
rno05133	Pertussis	9	1.67078	0.0873301
rno05134	Legionellosis	9	2.17798	0.0203929
rno05135	Yersinia infection	16	1.60615	0.0398052
rno05140	Leishmaniasis	15	2.86307	0.000166989
rno05142	Chagas disease	16	2.0849	0.00378298
rno05143	African trypanosomiasis	6	2.03278	0.0709761
rno05144	Malaria	11	2.71038	0.00194658
rno05145	Toxoplasmosis	14	1.74061	0.0290572
rno05146	Amoebiasis	24	3.38797	7.31652e-08
rno05150	Staphylococcus aureus infection	11	1.52113	0.106243
rno05152	Tuberculosis	19	1.46299	0.0599651
rno05160	Hepatitis C	8	0.686171	0.905263
rno05161	Hepatitis B	13	1.12932	0.365534
rno05162	Measles	12	1.14523	0.355665
rno05163	Human cytomegalovirus infection	29	1.61067	0.00709292
rno05164	Influenza A	13	1.04866	0.471384
rno05165	Human papillomavirus infection	33	1.28141	0.082845
rno05166	Human T-cell leukemia virus 1 infection	21	1.15687	0.273435
rno05167	Kaposi sarcoma-associated herpesvirus infection	24	1.53418	0.0232194
rno05168	Herpes simplex virus 1 infection	21	0.746954	0.94129
rno05169	Epstein-Barr virus infection	17	1.03776	0.473648
rno05170	Human immunodeficiency virus 1 infection	18	1.06989	0.418024
rno05171	Coronavirus disease - COVID-19	23	1.08984	0.363864
rno05200	Pathways in cancer	61	1.55097	0.000329211
rno05202	Transcriptional misregulation in cancer	30	2.15109	4.9048e-05
rno05203	Viral carcinogenesis	15	0.936766	0.643134
rno05204	Chemical carcinogenesis - DNA adducts	10	1.78314	0.051692
rno05205	Proteoglycans in cancer	24	1.60219	0.0143743
rno05206	MicroRNAs in cancer	21	1.7353	0.00909941
rno05207	Chemical carcinogenesis - receptor activation	18	1.14523	0.30835
rno05208	Chemical carcinogenesis - reactive oxygen species	18	1.05599	0.440451
rno05210	Colorectal cancer	8	1.23199	0.3229
rno05211	Renal cell carcinoma	8	1.57123	0.134238
rno05212	Pancreatic cancer	7	1.26484	0.31604
rno05213	Endometrial cancer	7	1.60785	0.142152
rno05214	Glioma	10	1.83134	0.0443123
rno05215	Prostate cancer	12	1.64265	0.0598491
rno05216	Thyroid cancer	5	1.78314	0.145188
rno05217	Basal cell carcinoma	3	0.655736	0.846107
rno05218	Melanoma	6	1.11385	0.454331
rno05219	Bladder cancer	5	1.65267	0.182078
rno05220	Chronic myeloid leukemia	8	1.38994	0.215909
rno05221	Acute myeloid leukemia	14	2.79009	0.000363071
rno05222	Small cell lung cancer	12	1.78706	0.0346594
rno05223	Non-small cell lung cancer	9	1.67078	0.0873301
rno05224	Breast cancer	10	0.915668	0.660748
rno05225	Hepatocellular carcinoma	19	1.45472	0.0627683
rno05226	Gastric cancer	10	0.903459	0.677279
rno05230	Central carbon metabolism in cancer	11	2.19222	0.0104397
rno05231	Choline metabolism in cancer	7	0.967991	0.591943
rno05235	PD-L1 expression and PD-1 checkpoint pathway in cancer	10	1.52268	0.119092
rno05310	Asthma	1	0.521226	0.864109
rno05320	Autoimmune thyroid disease	4	0.785616	0.759462
rno05321	Inflammatory bowel disease	7	1.55513	0.160885
rno05322	Systemic lupus erythematosus	13	1.51875	0.0850478
rno05323	Rheumatoid arthritis	23	3.62434	3.51727e-08
rno05330	Allograft rejection	4	0.903459	0.655593
rno05332	Graft-versus-host disease	6	1.37816	0.267559
rno05340	Primary immunodeficiency	8	3.01153	0.00400142
rno05410	Hypertrophic cardiomyopathy	21	3.12736	1.97815e-06
rno05412	Arrhythmogenic right ventricular cardiomyopathy	13	2.28798	0.00386183
rno05414	Dilated cardiomyopathy	19	2.73921	4.48749e-05
rno05415	Diabetic cardiomyopathy	28	1.80692	0.00156927
rno05416	Viral myocarditis	8	1.32213	0.257161
rno05417	Lipid and atherosclerosis	33	2.15006	2.09999e-05
rno05418	Fluid shear stress and atherosclerosis	26	2.36476	2.98795e-05
