# Supplementary material for: Peptide-based Self-adaptive Implant Coating Sequentially Regulates Bone Regeneration to Enhance Interfacial Osseointegration
Source: Research Square preprint supplement (doi:10.21203/rs.3.rs-5132912/v1), 2024-10-01
Supplement: Supplementary file 53 [file enrichment_kegg.xls]

groups	Tested term	p-value<0.05	p-value<0.01	q-value<0.05	q-value<0.01
S-vs-C-Down	283	100	64	69	35
S-vs-C-Total	314	102	70	71	41
S-vs-C-Up	288	50	21	15	11
