# Supplementary material for: Peptide-based Self-adaptive Implant Coating Sequentially Regulates Bone Regeneration to Enhance Interfacial Osseointegration
Source: Research Square preprint supplement (doi:10.21203/rs.3.rs-5132912/v1), 2024-10-01
Supplement: Supplementary file 57 [file 10_spindle organization(GO_0007051).heatmap-data.xls]

id	S1	S2	S3	C1	C2	C3
Aunip	0.6319148194636054	0.4797848567418729	0.6797376612687197	0.22550730705767008	0.12867496779176368	0.1874078973249957
Cep72	0.7550452786605579	0.9745629799444296	0.8130889713266456	0.3893524525761336	0.3061774765312948	0.40351261739663147
Aspm	1.7240003693827772	1.327302782748162	1.439747361372649	0.5958256625200207	0.7104646833689627	0.6408447883420779
Knstrn	5.60650153183105	5.241591794207037	5.551190828694544	2.546646868569236	2.336254712406709	2.2383529642379183
Aurkb	5.8815742707038225	6.626176158747178	6.2287651434114615	3.5659676370519526	3.123227835191288	3.1841647991633817
Spag5	3.2607461464282457	3.183447242980696	3.810475056727817	1.7677701870242577	1.9984397990254807	1.756826856044682
Aurka	4.564909144572717	4.157649797667525	4.646708377780113	2.153359347729248	2.86180920409052	2.600510260692099
Kif11	2.5024539970212527	2.4249873816532794	2.476191729379635	1.4118873261058378	1.524625550895182	1.3777391355000672
Pcnt	1.6224573462561283	1.2676198322630332	1.2676102146223667	1.0292108498586456	0.9188729323433052	1.1101383542178436
Ckap5	12.479101836799172	10.777256642037598	12.647589577104725	10.434744670822614	10.10420389489495	11.487198548342446
Rgs14	0.16363663491496258	0.3249406802190985	0.2909228183973759	0.11581860451510609	0.3965180727460085	0.189752114851314
Kiz	1.2973088503240513	1.2046627903491254	1.4032967036234794	1.3211628500737764	1.1077103285542447	1.4775305896992907
Ranbp1	74.92851059200994	73.45588097082349	80.21435555364575	75.73844064612943	78.91615592033081	80.3424026259922
Trim36	0.139396755661928	0.10022303218785769	0.0854578467338617	0.1506662907889366	0.0570495649771035	0.1357128430624695
LOC120095234	0.0656606019640648	0.020059274070266003	0.041049771457923205	0.0408555697911649	0.074932312638975	0.025464776259817003
Ntmt1	11.88917910669542	11.153660349520992	10.913144590132555	11.478228949990557	13.53268743949089	11.263192422558966
RGD1565297	0.5533655362960723	0.4626707601176242	0.6509391547915702	1.1779266047169816	0.6337202203299162	0.3524098232133499
Uvrag	1.901989969101675	1.7229753114558943	1.8622913042178943	1.9916496041774951	2.0811376889041093	2.148628404552722
Chd3	20.3236102095406	19.75479735521531	20.13906571316416	37.42907222864993	36.80599675598778	36.7485061532921
