# Supplementary material for: Peptide-based Self-adaptive Implant Coating Sequentially Regulates Bone Regeneration to Enhance Interfacial Osseointegration
Source: Research Square preprint supplement (doi:10.21203/rs.3.rs-5132912/v1), 2024-10-01
Supplement: Supplementary file 61 [file 1957_calcium-mediated signaling using intracellular calcium so...(GO_0035584).heatmap-data.xls]

id	S1	S2	S3	C1	C2	C3
Tenm2	0.0009208756953756	0.0018286147906002	0.0018710604580828999	1e-08	0.0009107882957298001	0.000928558393622
Homer2	1.9690693304229527	1.7993998578150812	1.7299122300030847	1.4112526375917946	1.4802696296351132	1.413881795065613
Prnp	234.49238982836346	237.49883693328417	242.52789259465996	196.95019610469208	197.78249501742806	201.4779454581289
Ptprj	2.0738028187461643	1.8546451578050966	1.8259074610692447	1.6681600289702039	1.4433567118422175	1.7627235336695652
Dmtn	1e-08	0.0362241355629457	0.0741299336189307	0.036889621768293704	0.009021135700347	0.055182825512799204
Kdr	1e-08	1e-08	0.0040806139379716	0.004061309073388	1e-08	1e-08
Fis1	41.941098621764084	46.05709278620224	43.06051148691586	44.81578155460416	44.07328743091977	43.78024218759155
Stimate	5.17776017811018	5.663434198423171	5.614430290646885	6.206526003081947	5.342281072284222	5.426611747531884
Vcam1	4.1761918240943094	3.723960664045739	4.370754578063656	4.294306826066092	4.317483751839584	4.258705486548951
Ryr2	1e-08	0.0013111168813981998	0.0026830907221396	0.0013352036890090999	0.0065302766661371	0.0013315456000894
Gpr143	1e-08	1e-08	1e-08	1e-08	0.0144829056821898	1e-08
Trpm2	0.0034227072571834	0.0135932204598738	0.06954369376508529	0.10728276501102939	0.0947857262340022	0.0759275651596557
Ptgfr	12.574581721633997	11.474478338484325	13.45328051268244	21.939545370870448	21.763480908369548	25.294841543452012
Adgrl1	1.277993706969863	1.5057045999180656	1.6034779200718643	3.111394009417444	3.040575980662533	2.945499167622538
Ntrk2	0.0576544125337209	0.0205489520531263	0.0450555638759	0.1420009473524474	0.1096593203488527	0.099873659536661
Ptprc	0.5584921298145432	0.4582740351530561	0.5439373559773472	1.1200635439238664	1.1275738993900477	1.0844158402012944
Selp	0.0356922313222717	1e-08	0.06526875945103619	0.3464531863056638	0.2965304222279896	0.2303359988593737
Ccl20	1.2172401865706168	1.409991952505798	1.8843699655911303	19.018288096189842	22.444251582916866	23.9634359623472
