# Supplementary material for: Peptide-based Self-adaptive Implant Coating Sequentially Regulates Bone Regeneration to Enhance Interfacial Osseointegration
Source: Research Square preprint supplement (doi:10.21203/rs.3.rs-5132912/v1), 2024-10-01
Supplement: Supplementary file 65 [file 1958_cholesterol biosynthetic process(GO_0006695).heatmap-data.xls]

id	S1	S2	S3	C1	C2	C3
Hmgcs2	0.0771506071200077	0.0905281342223261	0.1282561959769474	0.0212749134694514	0.0624317578859327	0.0565776518132807
G6pd	176.03552063079954	185.07424321680028	165.43586536021175	128.1649342683324	122.96607704568807	112.71279863880531
Lbr	4.91108391347772	4.428340293859637	5.246572913519636	3.735176661838858	3.940817462432857	4.478652481615447
Prkaa1	8.752164172219333	7.897553653030977	8.952288994571214	6.635810283275359	7.364012558636223	8.483238277451544
Cyb5r3	126.92410452007971	129.68343808362192	123.07868848132145	117.4821507344403	122.81651476279416	110.77462776034143
Ebp	24.934358607353985	23.96675906072997	25.05479995031484	27.94216854197338	26.483376955049664	23.85465454145981
Insig2	6.196169631546379	6.017343817449097	6.207783291120781	6.835232467530492	6.643693293489005	6.550179693188442
Prkaa2	0.0570387805515088	0.0495532175978507	0.0338023027833787	0.088912009136007	0.0235058238292692	0.0575146497957349
Apoa5	1e-08	1e-08	0.0129817478382854	1e-08	0.0126383490815439	0.0128849343633051
Acat2l1	0.02999142181152	0.1191106242639735	1e-08	0.07581178339335859	0.1483144008682773	0.030241637416345103
Npc1l1	1e-08	0.0052605733229697	1e-08	1e-08	0.0052402969362499	0.0053425396140533
LOC120102490	0.34069381755676387	0.338265585400745	0.3213947507877279	0.6643542412598269	0.2166182842681489	0.3926127926549552
Apoa1	1e-08	0.1851138485067069	0.1352933745351126	0.1615839787578581	0.13171453372385258	0.5371375768212479
Hmgcs1	23.754600988824755	23.66113141964437	25.73245551472277	30.11977302507365	29.526336937610704	32.12860367142526
Mvk	11.48731913102322	13.407107767354901	11.230323378639001	15.705530882680454	15.175409832129446	15.498782218087014
Hsd17b7	4.894434694332905	5.042204243772034	5.203508394128996	6.285157180375687	6.703410201237251	6.79026557934766
Nsdhl	13.464955115213941	11.864791758407877	13.341454348604104	17.283508480980394	17.140195152305502	17.832305027033172
Idi1	7.917559821779072	7.5325550479638625	8.76643330963654	10.197245100098536	10.866604691494802	11.912855425426965
Dhcr24	20.599505642464322	21.788519480837934	21.16139894951804	29.346087453607588	30.39594303408245	27.91515071716509
Insig1	16.494584888868243	16.91602927325232	16.32749611922883	22.89460179111236	21.964139512820392	23.799382776254202
Hmgcr	8.985529534293116	8.787515673869352	9.225037179578154	13.37037429610163	11.956559648557683	12.734077207938304
Pmvk	10.31975739664753	10.520482236932422	11.005235808061935	15.80129631483095	15.495467343810157	15.340178923043867
Fdps	92.62636348479936	101.41806092235156	89.2558108446512	136.58441159993063	148.28862548291644	136.6422608156784
Lss	21.772436373303858	21.79292580485641	20.42428954297229	33.61706060211019	33.743331949552434	33.682974838589054
Fdft1	17.014738392143993	17.60790644310298	18.298369745696828	27.76864067155409	27.992892885324263	28.924517915222374
Acat2	21.78254914307356	24.093979068983106	22.18912094366798	34.60841762082498	38.91883194788837	36.73377247696301
Cftr	0.0290485849120626	0.05047269898404	0.022133265832856602	0.0624142235622734	0.0610520448731355	0.08787278354468739
Msmo1	35.95991299218881	36.63740222043139	35.520703877908396	69.2089841970295	66.95983245573854	69.0751537940524
Dhcr7	5.4628726182259975	5.501299020539356	4.960552244328873	10.460666501758341	10.609120899260377	9.401900828385816
Srebf1	7.260964765414956	6.795743979026152	7.051117998420728	14.246052740842428	14.526546845872792	13.318746848114055
Mvd	9.94651000424765	11.356960804639018	9.768023060865081	21.30138332818818	21.546974534880558	19.836108026085856
Tm7sf2	3.3758421151244167	3.696357083766169	3.2212439827401385	11.037588125945954	11.202350965627257	12.327593451061597
