# Supplementary material for: Peptide-based Self-adaptive Implant Coating Sequentially Regulates Bone Regeneration to Enhance Interfacial Osseointegration
Source: Research Square preprint supplement (doi:10.21203/rs.3.rs-5132912/v1), 2024-10-01
Supplement: Supplementary file 73 [file 1960_neuron remodeling(GO_0016322).heatmap-data.xls]

id	S1	S2	S3	C1	C2	C3
Epha8	0.0382446611208481	1e-08	1e-08	1e-08	1e-08	1e-08
C1qa	11.579169287790016	12.1066667415584	9.698886962689205	8.625579103394987	8.086745960162618	10.222258611389936
Ednra	4.442841297192838	3.9847315409373305	4.532335638448481	3.6003095569099006	3.6222239144770985	3.581131893355224
Farp2	8.301351392368046	7.151665583271228	7.0486750365676905	6.678196174149452	6.8282729410180565	6.640122641416358
Abl2	2.2735349065746093	2.136537090850852	2.5974783729007203	2.0489312614535757	2.156503874712736	2.3365893923301413
Gnaq	25.28679433799367	24.23473328290259	24.551182549734694	24.415899031744324	23.5461186450472	26.03969686722987
Anks1a	1.950914268057835	1.8892476096761248	1.8543650694126732	1.9644884178275015	2.064347171448857	1.897126246007217
C1ql1	1e-08	1e-08	0.0161011881889846	0.016025015379934802	0.0627010603831351	0.015981110967339
Pdgfb	0.009086049764081	1e-08	1e-08	0.018374037657423303	0.0089865189478514	0.045809228812748404
App	246.8160517414219	250.9273330756075	245.8545423188853	355.97205369291476	352.4521928050844	351.87120106202036
Scarf1	0.4874441683693338	0.49217288139605947	0.33573148542697867	0.5262755007083835	0.8906677743660183	0.6831167990114327
Cspg4b	1.187957880709424	0.9565541850953585	1.0211971301369571	1.6473048303193882	1.7792019459545245	1.7244046823573627
Ntn4	1.8449090916954112	1.8542354239139787	1.4028344010850138	2.5863991096666914	2.7202575067966257	3.1499575134782183
Rnd1	1.6471805056657456	1.2849889908391032	1.105640914261729	3.0038225712420963	2.6909849968625363	2.120642477617539
Cspg4	0.935168025406368	0.9314134552039829	0.8011437635790856	1.6421335190804687	1.8469484508357474	1.7381391370249133
C3	0.8214797367956509	0.9824571335865516	0.635401442825146	11.510540568596815	11.47629451084744	10.895406202913133
