# Supplementary material for: Peptide-based Self-adaptive Implant Coating Sequentially Regulates Bone Regeneration to Enhance Interfacial Osseointegration
Source: Research Square preprint supplement (doi:10.21203/rs.3.rs-5132912/v1), 2024-10-01
Supplement: Supplementary file 77 [file 1961_sterol biosynthetic process(GO_0016126).heatmap-data.xls]

id	S1	S2	S3	C1	C2	C3
Cyb5r1	61.220934702303374	64.22601350656949	64.30265344598925	46.939699631088494	48.53111063393064	45.112703250733176
Lbr	4.91108391347772	4.428340293859637	5.246572913519636	3.735176661838858	3.940817462432857	4.478652481615447
Prkag2	0.9052937204693893	0.8236823139289428	0.9165664329905608	0.7935153674158221	0.7960603510798342	0.9034999519467992
Cyb5r2	0.020123142825944802	0.0399594278306262	0.047701460849972004	1e-08	0.0663423395130339	0.0338183738034057
Ebp	24.934358607353985	23.96675906072997	25.05479995031484	27.94216854197338	26.483376955049664	23.85465454145981
Insig2	6.196169631546379	6.017343817449097	6.207783291120781	6.835232467530492	6.643693293489005	6.550179693188442
LOC120102490	0.34069381755676387	0.338265585400745	0.3213947507877279	0.6643542412598269	0.2166182842681489	0.3926127926549552
Erg28	15.396467046572822	16.138321185087086	17.641403136314512	20.04591143104984	18.67666582544515	18.57319000240965
Insig1	16.494584888868243	16.91602927325232	16.32749611922883	22.89460179111236	21.964139512820392	23.799382776254202
Hmgcr	8.985529534293116	8.787515673869352	9.225037179578154	13.37037429610163	11.956559648557683	12.734077207938304
Sc5d	12.735867536041681	12.460391359136892	11.935507586133538	17.338674898246055	17.606591374051757	17.647095339785487
Pmvk	10.31975739664753	10.520482236932422	11.005235808061935	15.80129631483095	15.495467343810157	15.340178923043867
Sqle	16.2609460176641	15.305800312732371	16.61641590103213	27.146359123609614	25.122220863509497	28.10542957789352
Msmo1	35.95991299218881	36.63740222043139	35.520703877908396	69.2089841970295	66.95983245573854	69.0751537940524
Dhcr7	5.4628726182259975	5.501299020539356	4.960552244328873	10.460666501758341	10.609120899260377	9.401900828385816
Tm7sf2	3.3758421151244167	3.696357083766169	3.2212439827401385	11.037588125945954	11.202350965627257	12.327593451061597
Ch25h	0.12566152431111868	0.445592456746622	0.3829858814944681	2.1599860649485176	2.5212097212739506	1.9911555315864224
