# Supplementary material for: Peptide-based Self-adaptive Implant Coating Sequentially Regulates Bone Regeneration to Enhance Interfacial Osseointegration
Source: Research Square preprint supplement (doi:10.21203/rs.3.rs-5132912/v1), 2024-10-01
Supplement: Supplementary file 81 [file 1962_positive regulation of interleukin-10 production(GO_0032733).heatmap-data.xls]

id	S1	S2	S3	C1	C2	C3
Il20rb	22.07196135654455	21.306101621309583	21.607417054659802	5.769860173782905	6.619428811605457	6.187382092764977
Cd34	0.3400039000525069	0.519354741009244	0.6022646987243467	0.2291882680921166	0.3362794100021865	0.33404973905661617
Hmgb1	16.85098915596664	14.831637555069126	18.39136220417084	11.611208731408807	11.388913494487065	12.182160122355187
Isg15	3.1428104579896963	3.2267882929894602	1.9592438283627804	2.2749706832582604	2.1193522559819904	1.7285621707387848
Hspd1	99.51966284395027	92.5488022131875	103.92649608828832	72.135127089658	71.91096405863897	84.24858802042306
LOC103694176	2.9988246591012255	2.1400429741613096	2.433019732646832	2.074075442458954	1.5859726208124683	2.2048859455729715
Tnfsf4	1e-08	0.0131853479082174	1e-08	1e-08	1e-08	1e-08
Cd46	0.5077637862577314	0.21500293249139119	0.5158470281568356	0.2567033128316525	0.2806420812985927	0.3312941295802574
LOC108349189	0.19121039728286748	0.4429776746903431	0.2913814930808711	0.1933353373563067	0.0630386165090201	0.3534770130918561
Tlr9	0.0285537870578174	0.0070875763220837	1e-08	1e-08	0.0141205058203804	1e-08
Tslp	0.8788858912845341	0.6672990217348759	1.0154288982328206	0.6272845000687157	0.7669926623395522	0.9035951860921633
Pycard	6.907237558123209	5.948801960597301	5.236316653343176	5.502544177762995	6.753942380192663	4.168365585184866
Prkcz	0.026245958226708003	0.13029443540375998	0.07554734486861839	0.0840358131987493	0.08220174730720829	0.0088216485905059
Tusc2	9.6551963620213	9.072824623994983	9.1199418194184	8.332987249308466	9.071959315749803	8.460829299805466
Stat3	49.260296108632225	50.3441265456452	49.39976371143686	48.40036706984254	46.82186110409516	45.92858278993048
Tlr4	2.4450720754571407	2.7372580057338647	2.4983958778171287	2.4077510727480425	2.2780975117607967	2.601250654613716
Pibf1	3.548769471973858	2.8835129437352616	3.906329218774728	3.086307742008927	3.729721768420965	3.765139397353895
Nod2	0.07187665240085239	0.09515248321911669	0.08345243051810239	0.0657539566196632	0.1354081760485747	0.0862813226814269
Lgals9	6.141022094150153	6.305961023581992	4.621885580669585	6.16372313192441	5.895548773656369	6.994675570231111
F2rl1	0.08743217377212009	0.1736180243631215	0.048449476695554904	0.128587364347755	0.18081013867281728	0.09617630343486179
Cd274	0.7524551457772326	0.6752563771093096	0.5831257108569607	0.8095875908199959	0.6917360328406282	0.8657335896387033
Lilrc2	1e-08	1e-08	1e-08	1e-08	0.0666065012346444	1e-08
Il12b	1e-08	1e-08	1e-08	1e-08	1e-08	0.1493986167748421
Rbm47	0.12978926725686699	0.135472639248689	0.08790361724847759	0.1884351540768612	0.1217845730034767	0.1744961128742982
Irf4	0.0032373930496574998	1e-08	0.0131556896359546	0.0229135328689306	0.0128076896926994	0.0848742082465567
Cd28	0.1678922351557749	0.06452734071459769	0.12104610439971329	0.2026144307209602	0.2089055110077627	0.3222026920372972
Lilra5	1e-08	1e-08	1e-08	0.024110138940204	0.11791965913444599	0.036066120038073204
Bcl3	2.258670891636593	2.2103825946702265	2.887497561972713	4.491053480316252	4.189952629212957	3.5415899573717255
Syk	0.5559910455341377	0.5751903492549122	0.4581935378922481	0.9356392896312299	0.8267735893746656	0.9487578248669096
Hgf	4.777219076338848	3.7774016607605136	4.681930315094095	7.1740793027048815	7.009747909421649	8.475362617797444
Cd83	0.3504321634779309	0.2319563520406153	0.2024375161566882	0.6878103540872438	1.2164749882182464	0.5612121262105518
Il23a	0.0307309893967489	0.1067918350697355	0.031220204956966903	0.2175074808155205	0.1519717317268072	0.139443153158235
Fcer1g	16.748009013186774	14.908436467296248	13.201002566651661	25.948636541630645	28.7737605410814	23.51180502524708
Sash3	0.3540838157448652	0.0811292728117967	0.08301244938998739	0.4589984386354035	0.5926547619151326	0.5584438963333866
Plcg2	0.5901699546190872	0.45160254315328857	0.40862076614140397	0.8931924435356917	0.8476736166878912	0.8300988353849464
Inava	0.103173080262288	0.1350315543098042	0.0809938154354984	0.3271843444416642	0.3617884237080367	0.19388124562158499
Trem2	3.571799241597226	1.8927105706639142	2.711301966362392	6.492571681219702	6.688262604237317	5.078658464361288
Ptger4	0.486538769421817	0.5249372114968959	0.5041698062732168	1.1642715310076766	1.1741501864965704	0.9550306038081786
Tlr2	1.167378749002209	1.4873467078791947	1.4807394247329988	7.307265458359606	6.560479348470582	7.7431235192170655
Clec7a	0.1373374293921149	0.07437741308046959	0.1522077202937602	1.2055890912512328	1.0866639298486092	1.34706399019345
Il6	2.7416885981804846	1.3048311434357924	1.5883311629087737	24.74322171395451	22.43278580944411	26.091984175764107
