# Supplementary material for: Peptide-based Self-adaptive Implant Coating Sequentially Regulates Bone Regeneration to Enhance Interfacial Osseointegration
Source: Research Square preprint supplement (doi:10.21203/rs.3.rs-5132912/v1), 2024-10-01
Supplement: Supplementary file 85 [file 1963_phagocytosis, engulfment(GO_0006911).heatmap-data.xls]

id	S1	S2	S3	C1	C2	C3
Gsn	187.6368463997936	198.52704869470202	185.7691089195766	107.01175739467287	110.04971898295796	106.59330623042314
Havcr1	0.0078796171964043	1e-08	0.0080050549964535	1e-08	1e-08	1e-08
Abca1	9.050913671080009	8.080815632875492	8.428939158332438	5.480854381503812	5.660446737344206	5.652509936644039
Adgrb1	0.0884520241918933	0.0458199693770052	0.046883544606483	0.0116654435086678	0.0456433603032665	0.0387782540233952
Timd2	0.0107238413519905	0.031942207677108404	1e-08	1e-08	0.0106063697455167	1e-08
Cdc42	142.17207506890543	134.71662467417949	146.0907312311434	122.16326555783212	117.12324922272208	124.31531994332279
Vamp7	21.620630998179152	20.643029877749104	22.645393340780988	17.85320536375431	19.222539157595865	20.055964147399774
Sh3bp1	5.9418928593414115	5.908414609461992	5.582612663517344	5.221926404621089	6.124248208658107	5.477911340522383
Arhgap12	2.4293413369923282	2.4164851152096842	2.518196186430372	2.565307670014564	1.9319545725590612	2.9567370560683703
Sirpa	10.819222032347136	10.345414029954977	11.20509018089069	12.379978444641019	13.50327121339882	12.271846283678583
Fcgr2a	4.526229638868598	4.653486448193169	4.474462427033856	5.450384046173802	5.3807447821982155	5.41310626526512
Gulp1	5.297709624342836	5.273595668746932	6.680437713170713	6.641885756943486	6.823133407380557	8.016326163772943
LOC498276	8.92883701007357	7.649808275993839	7.473802955459845	10.108034092787463	10.718304426241863	9.196949468872475
LOC100909964	1e-08	1e-08	1e-08	1e-08	1e-08	0.020354455733337103
Clcn3	2.493469456338932	2.6304288201092896	2.681591296749058	3.1908679672973004	3.220773195939297	3.650278057772244
Itgam	1.4073236132805402	2.1483382502030226	1.6978010652470932	2.8281396296002983	2.8360113754163905	2.5661421454182114
Aif1	0.9749855239786217	0.8988910316899209	0.9728189892565194	1.8836215614894287	1.6358750248673488	1.439568184490269
Fcer1g	16.748009013186774	14.908436467296248	13.201002566651661	25.948636541630645	28.7737605410814	23.51180502524708
Myh9	337.4568951156196	343.6124317705046	333.2399616375525	609.5838085063922	599.6870492713438	591.3907621679783
Bin2	0.959429168839074	0.6350606798692429	0.9622064185737208	1.4924483032543987	1.532869689002974	1.7860312503685416
Elmo1	0.0696323068050464	0.0643125732344461	0.07732134292806189	0.129350802297373	0.1153164268310266	0.1730837929019062
Trem2	3.571799241597226	1.8927105706639142	2.711301966362392	6.492571681219702	6.688262604237317	5.078658464361288
Msr1	1.1012080221816245	1.2049266467492368	1.4360949013080637	2.5382020722650434	2.7917678489839446	3.3561131208340744
Fcgr2b	2.1320648074201642	2.3068443236275917	2.131294147316972	5.942155251661032	5.1703937685417785	5.808735872772688
Arhgap25	0.1701585811042212	0.110464569794356	0.2260573475587791	0.5955561800901157	0.8091087136380941	0.6533169585006197
Siglec8	0.0074133536522213	0.0441630484915813	0.0075313688648537	0.16490604532488978	0.2052998174223005	0.1495038600012803
Fcgr1a	2.052924268466584	1.8137347906663754	2.2977008387028603	8.12704439896522	7.5194960371933375	8.38546334284918
Itgb2	2.8256154879372497	3.3781705898655345	2.8112567849725583	12.564968058114014	11.481948602593457	12.037272758044807
Clec7a	0.1373374293921149	0.07437741308046959	0.1522077202937602	1.2055890912512328	1.0866639298486092	1.34706399019345
