# Supplementary material for: Peptide-based Self-adaptive Implant Coating Sequentially Regulates Bone Regeneration to Enhance Interfacial Osseointegration
Source: Research Square preprint supplement (doi:10.21203/rs.3.rs-5132912/v1), 2024-10-01
Supplement: Supplementary file 89 [file 1964_monocyte chemotaxis(GO_0002548).heatmap-data.xls]

id	S1	S2	S3	C1	C2	C3
Anxa1	376.73565673419887	382.1649941795588	402.3250159005025	234.15497377769	235.81783786798562	268.5453523514573
Ccl17	1e-08	0.1551779472300447	0.0396949938520512	1e-08	0.038644964320298604	1e-08
Myo9b	20.25817270880321	20.20784923983692	18.07826458826393	16.316396325317648	16.385068935147743	15.762208063315834
Lgals3	222.4311361934632	243.9668397403114	221.70490706375801	194.5495572809423	202.99045238115713	181.08210520988985
LOC120095010	0.0120561299720952	1e-08	0.0061240324578266	0.00609506041691	1e-08	1e-08
Msmp	1e-08	0.045472848472634005	0.1395850789420291	1e-08	0.0905951446928471	1e-08
LOC100362339	19.468758368493745	20.070110941578093	18.976848623537276	17.69000344891007	18.951914997055805	18.746896851419802
Rps19	732.95734767024	772.4719556902472	774.3987028119035	741.9531517633741	777.4287818813854	733.0381682219196
LOC100360843	1.3377525311974627	1.0183004286028075	0.7248259298295451	0.7213968623577446	1.1907886024458132	1.1240944000755397
Tnfsf11	0.0105189880653909	1e-08	1e-08	1e-08	1e-08	0.010606746937007699
Ccl22	1e-08	1e-08	0.01378520209991	0.027439961905584603	1e-08	1e-08
Ccl5	0.2432693897109085	0.2415355321611484	1e-08	0.409954770918196	0.1203022821820256	0.3270652818521159
Ccl25	1e-08	1e-08	1e-08	1e-08	1e-08	0.0177120017249291
LOC108352823	1e-08	1e-08	1e-08	0.0202036876688798	1e-08	1e-08
Ccl24	1e-08	1e-08	1e-08	1e-08	1e-08	0.06536829157482399
Ccl19	1e-08	1e-08	1e-08	0.1339376773433434	1e-08	1e-08
Cx3cl1	2.2622502926619514	2.0508111729633924	2.2649555549672193	3.169196670754258	3.0676024515568456	2.6117217252743736
Flt1	0.0444715967531836	0.021117438743579003	0.0314292573811439	0.0430107789717212	0.0573710102893213	0.044842619132753704
Pdgfb	0.009086049764081	1e-08	1e-08	0.018374037657423303	0.0089865189478514	0.045809228812748404
Ptpro	0.3093354207804584	0.2153903568746176	0.13060149063437	0.5321204550167233	0.4370669687701237	0.3281196151003667
Ccl11	0.2178977366122248	0.3365362112933792	0.1475776800266443	0.41615858529609917	0.4070760012144344	0.5859083497596188
Ccl7	97.50027735141671	95.49442585061105	110.1410371748048	178.56633709606038	166.89189861148552	179.733917525015
Ccl3	1.1619285592469741	0.6235930468793576	0.7656815022337302	2.635454541992944	2.2673415076410772	1.4566116583811741
Ccl2	134.9051384899577	123.15338886330427	140.0133684370735	309.67225801201914	308.1979697475727	325.9041901470409
Ccl9	0.017829994657526403	0.017702914736710602	0.0181138354626077	0.5949283347300809	0.33505874798487867	0.2876598274121019
Ccl4	0.036881972033014104	0.1830954733204967	0.112407300721229	1.6408407477809916	1.3496840688313656	1.3760176101130297
Ccl20	1.2172401865706168	1.409991952505798	1.8843699655911303	19.018288096189842	22.444251582916866	23.9634359623472
Ccl6	1e-08	1e-08	0.1557528459202066	4.839943613289183	5.256603465573748	4.191141464841647
Ccl12	1e-08	0.0435360423895403	1e-08	13.655441261088475	15.178879290250643	12.468454984717885
