# Supplementary material for: Peptide-based Self-adaptive Implant Coating Sequentially Regulates Bone Regeneration to Enhance Interfacial Osseointegration
Source: Research Square preprint supplement (doi:10.21203/rs.3.rs-5132912/v1), 2024-10-01
Supplement: Supplementary file 93 [file 1965_chemokine-mediated signaling pathway(GO_0070098).heatmap-data.xls]

id	S1	S2	S3	C1	C2	C3
Ccr1	3.3935793505498646	3.801691621473868	3.642750069500296	2.149413441176506	2.0138431298367	1.7432278380706339
Cxcr2	0.1436131692127071	0.1960606865685137	1e-08	1e-08	1e-08	1e-08
Cxcl10	0.8352105787899504	0.2487773379402304	0.4242532765668964	0.06333693602545669	0.3097730565357274	0.2737080725993457
Ccl17	1e-08	0.1551779472300447	0.0396949938520512	1e-08	0.038644964320298604	1e-08
Ackr2	0.013561418720043	1e-08	1e-08	1e-08	0.0026825807122681	1e-08
Ackr3	26.568518744373844	28.07890135058917	28.25634313501702	25.447527989895622	24.48533420831498	23.730044224693827
Foxc1	12.965653287065154	12.589925399636039	14.01154198772428	13.782961089655721	12.864782081806421	12.62424323470515
Cxcl11	0.022465114008724002	1e-08	1e-08	1e-08	1e-08	0.022652538316133203
Gpr75	0.0712539116498926	0.1142820950225433	0.1336397889685723	0.0609618012995021	0.1463677744881312	0.16027713511827069
Ccl22	1e-08	1e-08	0.01378520209991	0.027439961905584603	1e-08	1e-08
Ppbp	0.0672676793897587	1e-08	0.0683385333362017	1e-08	0.06653081204005959	0.2034866422034471
Ccl5	0.2432693897109085	0.2415355321611484	1e-08	0.409954770918196	0.1203022821820256	0.3270652818521159
Ccr3	1e-08	1e-08	0.0066542728532069	0.0132455746127926	0.012956492610291	1e-08
Ccl25	1e-08	1e-08	1e-08	1e-08	1e-08	0.0177120017249291
Ccl24	1e-08	1e-08	1e-08	1e-08	1e-08	0.06536829157482399
Ccl19	1e-08	1e-08	1e-08	0.1339376773433434	1e-08	1e-08
Cx3cl1	2.2622502926619514	2.0508111729633924	2.2649555549672193	3.169196670754258	3.0676024515568456	2.6117217252743736
Cxcl12	235.16738342231912	227.3939622664108	243.16183554758885	327.63442333283683	333.27438758935574	347.7251075236648
Ptk2b	5.0047402018208365	6.17640289322366	5.381813077450496	8.435828020403415	7.9788875615546155	8.30486067774468
Ccl11	0.2178977366122248	0.3365362112933792	0.1475776800266443	0.41615858529609917	0.4070760012144344	0.5859083497596188
Ccl7	97.50027735141671	95.49442585061105	110.1410371748048	178.56633709606038	166.89189861148552	179.733917525015
Ccl3	1.1619285592469741	0.6235930468793576	0.7656815022337302	2.635454541992944	2.2673415076410772	1.4566116583811741
Pf4	31.857146643134623	30.95711006408917	30.160763866533145	54.37064135498273	58.99403027697197	59.324896629191244
Cxcl1	62.27904712707263	55.91370437344116	61.69774748365794	120.06603887177532	121.1605057650627	129.947624751638
Ccl2	134.9051384899577	123.15338886330427	140.0133684370735	309.67225801201914	308.1979697475727	325.9041901470409
Cxcl3	32.70067469547253	31.103421525281657	34.36119114789618	86.75848024885111	85.56710472739414	89.77657033703572
Ccl9	0.017829994657526403	0.017702914736710602	0.0181138354626077	0.5949283347300809	0.33505874798487867	0.2876598274121019
Cxcl13	2.1009955401858997	1.4184943394977116	1.8996533011060595	5.077182415494066	5.6521074727537455	4.597196967772288
Cxcl2	0.2788196251517538	0.5110751728337344	0.3922037091468971	1.3228467856295119	1.803081166737848	1.2327161297252303
Ccr5	0.08592903283336929	0.1706331692041661	0.06789763963725849	0.6468028279519022	0.566584904792766	0.5006208857865453
Cxcl6	42.01055793925988	44.28991513293109	46.829427988508044	244.71688440308	238.05415328611716	280.86442863633494
Ccl4	0.036881972033014104	0.1830954733204967	0.112407300721229	1.6408407477809916	1.3496840688313656	1.3760176101130297
Ccl20	1.2172401865706168	1.409991952505798	1.8843699655911303	19.018288096189842	22.444251582916866	23.9634359623472
Ccl6	1e-08	1e-08	0.1557528459202066	4.839943613289183	5.256603465573748	4.191141464841647
Ccl12	1e-08	0.0435360423895403	1e-08	13.655441261088475	15.178879290250643	12.468454984717885
