# Supplementary material for: Peptide-based Self-adaptive Implant Coating Sequentially Regulates Bone Regeneration to Enhance Interfacial Osseointegration
Source: Research Square preprint supplement (doi:10.21203/rs.3.rs-5132912/v1), 2024-10-01
Supplement: Supplementary file 97 [file 1966_neutrophil chemotaxis(GO_0030593).heatmap-data.xls]

id	S1	S2	S3	C1	C2	C3
Spp1	1161.7405365134805	1169.2708993871843	1165.5576979850223	202.34258870094072	202.2785386289191	209.57615809568364
Dpep1	28.573470137239127	29.22013952945079	27.54528416830648	11.065374902440062	11.411030658626684	10.382473995296477
Cxcr2	0.1436131692127071	0.1960606865685137	1e-08	1e-08	1e-08	1e-08
Cxcl10	0.8352105787899504	0.2487773379402304	0.4242532765668964	0.06333693602545669	0.3097730565357274	0.2737080725993457
Prkca	9.316841770358932	9.24258726021399	9.066203536910672	6.635572306714202	6.949536254440923	7.6485364330296575
Edn2	1e-08	1e-08	0.021193983757130403	1e-08	1e-08	1e-08
Ccl17	1e-08	0.1551779472300447	0.0396949938520512	1e-08	0.038644964320298604	1e-08
Ppib	501.05712246057834	547.3944326493125	524.1326615299156	441.02952748825874	444.8741657162645	420.561055952796
Ppial4d	32.677805075963875	28.77828742282905	28.815748943040006	24.22375938751597	25.659439299557572	25.59682260944594
Lgals3	222.4311361934632	243.9668397403114	221.70490706375801	194.5495572809423	202.99045238115713	181.08210520988985
S100a8	0.09586324734896799	0.4758999591974044	0.0973893226086762	0.1938571601022076	0.0948131367939311	1e-08
Srp54a	20.099586492964946	20.04635896271252	21.954862855615602	17.554143559668688	16.758492483228768	20.096603710444
Ppia	1103.6513975228506	1089.2352923115354	1105.8143245916601	944.6457223499548	962.31136573784	996.3784501628217
Vav3	0.07507362961063749	0.10137243291337479	0.1708419848894368	0.1093074151178713	0.11880200019962449	0.0666159677164867
Tgfb2	34.06262770245064	30.413957780311883	33.81103051467641	29.556495985047636	29.655117690102568	31.160400455547048
LOC100911252	1.109421277579422	2.3289154775850487	2.7694026585053546	2.435800827750095	1.7869799459193527	1.534185702864544
Itga1	11.018024138426838	10.186151117611569	11.684746043673707	9.916886059897617	10.046972485975425	11.586768243702165
Cxcl11	0.022465114008724002	1e-08	1e-08	1e-08	1e-08	0.022652538316133203
Jaml	0.13293036579056888	0.1319829292440801	0.1519273376695349	0.302417164159444	0.0821713865547403	0.0335098553967782
Ccl22	1e-08	1e-08	0.01378520209991	0.027439961905584603	1e-08	1e-08
Ppbp	0.0672676793897587	1e-08	0.0683385333362017	1e-08	0.06653081204005959	0.2034866422034471
Pikfyve	4.928394874117576	4.16993561231066	5.201742795547557	5.546599354750152	5.070920245738496	6.070265840628758
Il1b	0.1261396883686192	1e-08	0.018306829036790703	0.018220221596364203	0.14258048073425258	0.1635326459260579
Ccl5	0.2432693897109085	0.2415355321611484	1e-08	0.409954770918196	0.1203022821820256	0.3270652818521159
Fcgr2a	4.526229638868598	4.653486448193169	4.474462427033856	5.450384046173802	5.3807447821982155	5.41310626526512
LOC498276	8.92883701007357	7.649808275993839	7.473802955459845	10.108034092787463	10.718304426241863	9.196949468872475
Bsg	333.80028604835735	351.5398565454164	330.0645541048798	427.01656563416014	440.3840114136648	402.530472947119
Ccl25	1e-08	1e-08	1e-08	1e-08	1e-08	0.0177120017249291
Ccl24	1e-08	1e-08	1e-08	1e-08	1e-08	0.06536829157482399
Ccl19	1e-08	1e-08	1e-08	0.1339376773433434	1e-08	1e-08
Cx3cl1	2.2622502926619514	2.0508111729633924	2.2649555549672193	3.169196670754258	3.0676024515568456	2.6117217252743736
Csf3r	0.0119707984859429	0.005942744451555	0.0060806875061534	0.0121038310503653	0.017759496085516403	0.048282648716288
Cklf	5.37980476789186	6.782250078218076	5.465447472750581	7.873092339263053	7.736269295949656	9.029250392416637
Cxadr	0.3814581546582865	0.4773694270720867	0.6216638249033103	0.6789880127451297	0.750629122729869	1.0577617014136564
Itgam	1.4073236132805402	2.1483382502030226	1.6978010652470932	2.8281396296002983	2.8360113754163905	2.5661421454182114
Ppial4g	1e-08	1e-08	1e-08	0.0407166053020793	0.039827973126022	1e-08
Ccl11	0.2178977366122248	0.3365362112933792	0.1475776800266443	0.41615858529609917	0.4070760012144344	0.5859083497596188
Syk	0.5559910455341377	0.5751903492549122	0.4581935378922481	0.9356392896312299	0.8267735893746656	0.9487578248669096
Trem3	1e-08	0.076744702569157	0.026175374759894402	0.1406782835616564	0.0917386741405479	0.11950873501408109
Trem1	0.8364047402423835	1.1665752765523592	1.9017536350195492	2.8995421104353754	2.6589938812730307	2.7108732262343165
Ccl7	97.50027735141671	95.49442585061105	110.1410371748048	178.56633709606038	166.89189861148552	179.733917525015
Fcer1g	16.748009013186774	14.908436467296248	13.201002566651661	25.948636541630645	28.7737605410814	23.51180502524708
Prex1	0.4034853668418895	0.3204876816173516	0.4660013199818918	0.7558168736092529	0.7687261345224182	0.5781575443681799
Ccl3	1.1619285592469741	0.6235930468793576	0.7656815022337302	2.635454541992944	2.2673415076410772	1.4566116583811741
Vav1	0.3844434282688503	0.3238695350823369	0.4615750399431134	0.8363278922490569	0.6394813131510972	0.6695786551053651
Pf4	31.857146643134623	30.95711006408917	30.160763866533145	54.37064135498273	58.99403027697197	59.324896629191244
Lbp	10.158293860362681	12.782265489875087	11.535441067529034	22.57582491714448	21.44428401733736	21.64805090033573
Nckap1l	0.592834704626145	0.8380201369635262	0.6277922243781439	1.4020400733108103	1.3764097961476713	1.2208910194831901
Cxcl1	62.27904712707263	55.91370437344116	61.69774748365794	120.06603887177532	121.1605057650627	129.947624751638
Itga9	0.1168573554667247	0.0757382032995087	0.136855058172628	0.2970310474124134	0.2809169615160514	0.2585763925856676
Pde4b	2.4853229120129585	2.7433592600019514	2.8395941104901166	6.343559838915954	5.879362002491671	6.340541471147532
Ccl2	134.9051384899577	123.15338886330427	140.0133684370735	309.67225801201914	308.1979697475727	325.9041901470409
Pde4d	1.0102834822038653	0.8568989964285745	0.9911003373186172	2.2052047187886594	2.1215593565465336	2.458669085864794
LOC680920	1e-08	1e-08	1e-08	0.2438211259334856	0.11924989254418829	0.1215765642450677
Cxcl3	32.70067469547253	31.103421525281657	34.36119114789618	86.75848024885111	85.56710472739414	89.77657033703572
Ccl9	0.017829994657526403	0.017702914736710602	0.0181138354626077	0.5949283347300809	0.33505874798487867	0.2876598274121019
Cxcl13	2.1009955401858997	1.4184943394977116	1.8996533011060595	5.077182415494066	5.6521074727537455	4.597196967772288
Cxcl2	0.2788196251517538	0.5110751728337344	0.3922037091468971	1.3228467856295119	1.803081166737848	1.2327161297252303
Itgb2	2.8256154879372497	3.3781705898655345	2.8112567849725583	12.564968058114014	11.481948602593457	12.037272758044807
C5ar1	0.8965602191806372	1.1015055094117419	0.7797777450876655	3.9130522634932134	4.127483251572143	3.375516750577804
Il17b	0.020324662038794003	1e-08	0.0206482161925691	0.164404185365649	0.2211221263082497	0.1434595412587392
Cxcl6	42.01055793925988	44.28991513293109	46.829427988508044	244.71688440308	238.05415328611716	280.86442863633494
Ccl4	0.036881972033014104	0.1830954733204967	0.112407300721229	1.6408407477809916	1.3496840688313656	1.3760176101130297
Ccl20	1.2172401865706168	1.409991952505798	1.8843699655911303	19.018288096189842	22.444251582916866	23.9634359623472
Ccl6	1e-08	1e-08	0.1557528459202066	4.839943613289183	5.256603465573748	4.191141464841647
Ccl12	1e-08	0.0435360423895403	1e-08	13.655441261088475	15.178879290250643	12.468454984717885
