# Supplementary material for: Peptide-based Self-adaptive Implant Coating Sequentially Regulates Bone Regeneration to Enhance Interfacial Osseointegration
Source: Research Square preprint supplement (doi:10.21203/rs.3.rs-5132912/v1), 2024-10-01
Supplement: Supplementary file 101 [file 1_chromosome segregation(GO_0007059).heatmap-data.xls]

id	S1	S2	S3	C1	C2	C3
Spc24	22.437724673213367	22.92604265454341	23.502422167947284	8.625930479437573	7.878029686861179	8.031737081089002
Incenp	6.584859507544794	5.97311213195214	6.46405737877113	2.3953177139451323	2.3353329777092644	2.7227094122917053
Cenpf	2.446125052762936	1.9021756899112416	2.8770824524855136	0.6616786367902953	0.7141932380370073	1.1422504581361514
Knstrn	5.60650153183105	5.241591794207037	5.551190828694544	2.546646868569236	2.336254712406709	2.2383529642379183
Esco2	0.9831567316461932	0.938363033322372	0.9730322072584509	0.3655658841346078	0.3764078693854968	0.5308568227918485
Nek2	2.912375518031684	2.5000448167894906	2.7198819945173245	0.8052026345837213	1.4027301552546076	1.1777283207499958
Ska1	2.1255695605125626	2.9638986110938546	2.4610890088271735	0.9955812353268825	0.6956091877653761	1.3080452127405744
Cenpt	2.8422815718145333	2.7109204389441555	2.523745552336556	1.221959682997753	1.5273158133544122	0.9478092004523513
Dlgap5	4.29132579955436	4.154640478603734	5.039584643978753	2.3372679799436837	2.3029455491196695	2.183413184680218
Ska3	2.6000857271288886	1.9676479419008852	2.601210840007632	1.2744144485610984	1.019233187553776	1.3828280375260704
Ndc80	1.9752373866805144	2.005175290017522	2.2618956656860925	1.006064982664817	1.0620569322687778	1.2417185894260694
Ttk	1.9278591372172627	1.7701097495747253	2.7382852207189865	0.8127107346053629	0.8129052053194832	1.261430158789516
Spag5	3.2607461464282457	3.183447242980696	3.810475056727817	1.7677701870242577	1.9984397990254807	1.756826856044682
Cdt1	1.818961053114585	2.2574959280105547	1.3537071055816083	1.0479022376404732	0.606651575185287	0.6504786413342887
Birc5	3.892487234021695	3.99314106925691	4.716440488945464	2.4059038215360826	2.4685071467523163	1.9820405651453183
Espl1	1.3304618647321282	1.5891479603406355	1.473594530946235	0.8395153108545331	0.5408661049399469	0.9246353194537709
Hjurp	2.1164889150453714	1.8606181540222544	1.8758097566957435	0.9975565949009436	1.0739087475851712	1.2449188473663408
Cenpe	1.8181163326766647	1.899050492665623	2.500968097216545	0.9530893727448336	1.3848555400191132	1.3626596114462222
Top2a	7.341654214464844	6.354364802245523	7.917381336621089	4.334174238153389	3.902438013700112	4.751951767926244
Chtf18	2.3428816198980145	2.62633582922219	2.3264326767558052	1.6429594667790834	1.4127549407759616	1.3564909587540357
Pttg1	4.751221711108227	3.72748636208867	4.0039181246242	2.031865264508764	2.619212637682348	2.9373473955613383
Sgo1	0.8864263212157493	0.9364354236618109	1.0446236191883014	0.5807876712900373	0.3857551245539247	0.6793044904715256
Cdca2	1.548938644332809	1.5930206934025002	2.098128872775054	0.886924879858002	1.1970240722147751	1.1420061127952428
Cenph	1.8894912956913408	1.385891824672067	1.6774626561475725	0.8950040487896317	0.9764866055786181	1.2530056417037567
Bub1	3.1825564112359	2.836302300771473	3.579821702112984	2.074917706593962	2.3569931723379063	1.8946574783613863
Spc25	2.908607516279652	2.256822362349511	2.714140015985928	1.6120659743167205	1.8112844477057184	1.7923117476973323
Cenpn	2.6132840048973693	2.9560571402413154	2.6738491154177106	1.8590648635323852	1.7354128424016502	1.9104376385283823
Cenpw	1.212750796549655	2.2026350028499477	1.5926589623550034	0.7327461335749592	0.8191475239373239	1.207955633024086
Oip5	0.8084369471272984	0.5083608130918252	0.8213066941012414	0.3542158535004868	0.2221058741701536	0.5615695928538228
Brca1	0.6395991068216977	0.8326806294901333	0.7293461024966188	0.4718321763974695	0.5809525482108846	0.5067348206617265
Smc5	6.0965774258200325	4.901988435116072	6.3043017750143155	3.8040245289584456	3.998057382413232	5.174520849767449
Mms19	8.867761699185653	7.9467725836216445	8.131233473122988	6.857324086973492	5.88980528416405	6.104280779649616
C3h9orf78	34.000415453608426	34.59579757540774	34.15869226281614	22.88859173512673	26.561476968210073	29.288087591153012
Ciao2a	23.387943737863452	25.897458436324463	22.749188303774492	17.987465155604408	18.825304080067173	20.34248616970573
Slc25a5	148.10726376559532	144.36766021533518	143.2885710201033	117.41241005284105	117.11372730243667	114.26543126500772
Cdk5rap2	3.764753689621143	3.4261146202909587	3.916939648609066	3.0873563437106863	2.698144035463537	3.403193081575964
Ppp1r7	20.64435605496564	19.034794959437242	20.692803257579836	16.334710958593593	17.017111701864216	16.88167463289178
Pmf1	10.719706811470537	11.038895914924792	8.673735664210225	8.460047201179158	8.725770585253976	8.188162953707941
Cenpc	1.8866492940743806	2.164135914452704	2.235260229656712	1.51257820994533	1.7185342487143151	2.016429129579795
Mis18a	0.7325381967667273	1.6685511330640936	1.2914053354287884	1.002095068899583	0.8523691571556322	0.9558996034385773
Arl8b	60.523336748655694	57.5733784974199	61.406292823647654	50.51169681384932	50.130591835221885	50.141504152607155
Nek8	1.173018675083975	1.1147442788277204	1.1065714282111085	0.9431957618950181	1.0938737488497279	0.8786551918475811
Rcc1	4.808007580088102	4.794464746498423	4.912822915956038	4.171973361839621	4.232320910861625	4.118446664168387
Ska2	4.462367185529828	4.92857144881005	4.006264822907385	3.4276889620628483	4.276633011844593	3.941506843466916
Ppp2r1a	106.93804625204957	112.42588843419584	103.04062741364869	97.40272612049104	96.45423553572935	88.34465525697485
Brd4	12.959581421873807	12.609820613573254	12.52012971836003	11.193133081384584	11.73284247676941	10.976467541214644
Numa1	16.07870848613867	16.487081997271126	16.14158899914521	14.121585349471497	14.64583947828607	14.58663859447992
Nup37	4.279793303489357	4.415325795527747	4.524106783244215	3.757471844311689	3.608082177240776	4.471631615850483
RGD1564131	0.5728601622224619	1.2165512376593328	0.9861322499697073	0.7562122598442638	0.7711850056901537	0.8664592180920975
Srpk1	18.47030520943497	17.69097382730707	17.269107513602815	15.950003110656617	15.88983382328346	16.569519875251185
Ciao1	7.227930256576335	8.02507764603522	7.023070851552968	7.5584338173178525	5.865834168840369	6.774124551261305
Ddx3x	79.35417120973288	73.17711144431556	82.88199752576955	69.10604403113439	68.95491961443868	75.6443071143563
Slc25a6	0.038190686814830704	0.037918489823148	1e-08	0.0193075568045343	0.018886173159758803	0.019254659068713202
Ddx3y	1e-08	0.029664940587194603	1e-08	0.0075524888762216	0.0073876574189593	1e-08
Mis12	12.309927777033904	10.79058778933296	13.153608743609277	9.530921747429725	11.63181108680327	12.63022026986997
Ciao2b	33.29117204713327	35.83350359216011	35.979940501538714	32.22875121449203	34.160818434124515	33.90902785995563
LOC102555739	0.5441481957398742	0.0926177020171442	0.0315891895329521	0.06287947956696689	0.0307535783757071	0.4075967834572003
Rgs14	0.16363663491496258	0.3249406802190985	0.2909228183973759	0.11581860451510609	0.3965180727460085	0.189752114851314
Banf1	59.24082291548333	71.15768874274734	67.0140887906841	62.851786980661366	61.23377987616273	66.12628180403186
Ctcf	10.879018287526323	9.015266517556233	11.833735771622315	9.070644996881336	10.83173879514367	10.682709837132926
Nek11	0.13088777312953329	0.10932713529513409	0.1667419295343598	0.1386443576777305	0.1376732955411745	0.12569500786893628
Cep85	3.82054365966916	3.867135408775256	4.3345771887197815	3.8514358682262517	4.016274900302344	4.0254308945296415
LOC120103068	1e-08	1e-08	0.0236066441652041	1e-08	1e-08	0.0234305937538807
Tlk2	8.811836231506373	7.739527864053218	8.240147080027256	7.753933290016067	8.363060634028303	8.728961102121088
Top1	19.078025860197666	16.981872028799707	20.900597929639652	18.19827458959606	18.647869324818142	20.416162663657033
Naa60	13.353573788909474	13.231207521919009	13.415912866067787	13.634888626383752	13.147705378038655	13.476027357281724
Nek6	27.684718705697232	26.69086965071013	28.043455632775604	28.13637547442341	27.66315537051545	27.56147835376249
Abraxas2	10.465598921570685	9.628580894547285	9.329316575910367	10.069618335419355	9.810701923935321	10.249576091993491
Top3b	10.190374731245877	11.117028146517018	9.410841492065407	10.81913719926124	10.838418364713968	9.841408673823093
Tlk1	7.2538942978445435	6.466298282489793	8.394132598224164	7.13495927700034	7.152745144756166	8.44651063314142
Usp9x	19.20914590080982	16.776343317734227	19.992953217621587	18.27657487598157	18.7530657356567	21.43298327061348
Ntmt1	11.88917910669542	11.153660349520992	10.913144590132555	11.478228949990557	13.53268743949089	11.263192422558966
Nde1	8.999716024625345	9.075705724192606	9.505668159216198	10.123870204029775	10.362755622006821	9.610581371253414
Ercc2	2.6027355381358754	2.8094729457128387	2.9357058647944	3.367175224423253	3.399296456962236	2.368734290020285
Ndel1	7.304037333064804	6.9636645393764125	7.023745691134738	7.61945513134231	8.00245792314817	8.032190032981264
Uvrag	1.901989969101675	1.7229753114558943	1.8622913042178943	1.9916496041774951	2.0811376889041093	2.148628404552722
Ube2i	26.851946468188764	26.006950350512064	27.342769185448734	30.45744320272627	30.56717494085468	30.28316209344049
Arl8a	41.82181147453615	42.694386782167854	40.34559092603051	49.29928149930498	51.118105737735384	46.03113188203743
Phf13	5.621715675730282	5.803435270983066	5.325419126634429	6.662925124244039	6.414406192096214	6.937486398983937
Nup43	4.725553784630555	4.942329141494407	5.279150937721587	6.4954536821390985	6.520018609925844	5.375438544041061
