# Supplementary material for: Peptide-based Self-adaptive Implant Coating Sequentially Regulates Bone Regeneration to Enhance Interfacial Osseointegration
Source: Research Square preprint supplement (doi:10.21203/rs.3.rs-5132912/v1), 2024-10-01
Supplement: Supplementary file 105 [file 2_mitotic sister chromatid segregation(GO_0000070).heatmap-data.xls]

id	S1	S2	S3	C1	C2	C3
Sgo2	2.199520901654152	1.4808653470148054	1.8630957520912732	0.7100255792530247	0.780628087270033	0.7783031287284788
Knstrn	5.60650153183105	5.241591794207037	5.551190828694544	2.546646868569236	2.336254712406709	2.2383529642379183
Nek2	2.912375518031684	2.5000448167894906	2.7198819945173245	0.8052026345837213	1.4027301552546076	1.1777283207499958
Nusap1	4.688451642891749	4.736524157752849	5.221679068659382	2.8007654650078484	2.272885919555729	2.6689546590739823
Ndc80	1.9752373866805144	2.005175290017522	2.2618956656860925	1.006064982664817	1.0620569322687778	1.2417185894260694
Kif18b	1.9354017855946835	2.0425479028456532	1.94558741801917	1.1084595704729547	1.084267645190729	0.9484799509783997
Kif18a	0.7462523464179286	0.5405171158231228	0.739489564509641	0.3525335693243324	0.24804251453168188	0.419414117329864
Plk1	8.508179246048215	9.04787147459503	7.48090254815866	4.858141517862324	4.5278564362995075	4.082723136744948
Spag5	3.2607461464282457	3.183447242980696	3.810475056727817	1.7677701870242577	1.9984397990254807	1.756826856044682
Cdca8	11.910258319067484	12.786093176327137	11.10238164738909	6.201157049792885	6.276925294779472	6.930285118313554
Espl1	1.3304618647321282	1.5891479603406355	1.473594530946235	0.8395153108545331	0.5408661049399469	0.9246353194537709
Mad2l1	3.0640968639936017	3.187415522584354	3.1933271699179318	1.687659413732597	1.596602329088439	2.076153474800388
Kif11	2.5024539970212527	2.4249873816532794	2.476191729379635	1.4118873261058378	1.524625550895182	1.3777391355000672
Kntc1	2.105546315453509	1.871877614572824	2.0034667076714667	1.3495692342177366	1.1055964272158727	1.1238029212596234
Sgo1	0.8864263212157493	0.9364354236618109	1.0446236191883014	0.5807876712900373	0.3857551245539247	0.6793044904715256
Nsl1	1.0600005798219476	0.711308078556491	1.017461247840381	0.5248028567648064	0.7953296348814787	0.6707917978708263
Ncapg2	1.9391374547498503	1.6351149190714536	2.0210932427686665	1.3537322271525414	1.3086451674091475	1.6986209227992557
Zw10	4.424304023012232	4.531061540147384	4.9566947877305445	3.56220899137638	4.136788592488082	3.928348170517205
Nipbl	8.422059250754938	7.948602477925196	9.732003228361133	6.807766200131745	7.003548482676004	8.855263812001816
Klhl22	29.265301154245325	30.635145229028446	28.10835377885789	25.69561507620248	26.911258451717085	24.84682565910884
Zfp207	31.672932893658906	33.81636005210807	33.93828806434442	31.61249085554308	28.55243007138842	30.17888451502804
Wapl	11.018840503183357	10.125882752338052	11.970225597726373	9.804875952476596	9.22958583242129	11.211228719922097
Mis12	12.309927777033904	10.79058778933296	13.153608743609277	9.530921747429725	11.63181108680327	12.63022026986997
Tubg1	23.32118978559927	22.772128314888402	23.47481860276659	21.544334263397467	22.57135708136633	20.938095356759526
Ran	111.56322650825108	117.13068813450336	115.29619884644636	110.64320721165923	109.60546379520004	104.75335571827928
Cenpk	2.537948167706424	3.0875200455408986	4.136694228249802	2.735349514887393	2.26189055191317	4.190210801443421
Kctd18	4.485616582708215	4.524654568672269	4.766275562920449	4.494970457078119	4.560973045735024	4.390348456828705
Ino80	5.643493698302914	5.614651790816627	5.7255706596943625	6.046187734524679	6.001149211411066	5.821571848164264
Wrap73	3.4543038705334483	2.6235616626016007	3.4942969738041922	3.3135794890225863	3.577067571056573	3.408697110718093
Zwint	39.50296674788768	42.21045768200805	42.538671942384376	42.946217164276106	44.67574619008099	48.26626426589426
Tubg2	1.5596432188451859	1.6637068547173277	1.5975664477516869	2.1243556769202456	1.5935521546720868	1.871589633140688
Dsn1	1.837910597255585	1.4722468534959914	1.653098528355478	1.953027733899672	1.8602310576804015	2.215236596659544
