# Supplementary material for: Peptide-based Self-adaptive Implant Coating Sequentially Regulates Bone Regeneration to Enhance Interfacial Osseointegration
Source: Research Square preprint supplement (doi:10.21203/rs.3.rs-5132912/v1), 2024-10-01
Supplement: Supplementary file 109 [file 3_xenobiotic metabolic process(GO_0006805).heatmap-data.xls]

id	S1	S2	S3	C1	C2	C3
Sult1a1	56.96358574766197	55.940946808763286	55.76065008062465	2.217519238074885	0.8830055400267588	1.3699209437412396
Gsta1	306.03792153875213	305.6026456078112	307.3784159785956	25.678036869004604	24.28845391676968	26.45302789980771
Fmo2	4.108763950911395	4.161069084891217	4.090689129246234	0.2492655126227445	0.3947648284508844	0.3551179799336311
Fmo3	2.40639781519826	2.1795036330388187	2.780619771006292	0.1857359140932711	0.054504685682159	0.0092613617630738
Ugt1a6	11.95986777662241	13.255842625938866	13.661682188035696	1.7875432661750081	1.681646786003988	1.7729046211086135
Gsta5	2.0317116515686466	1.2452043262262593	2.064055070764603	1e-08	0.0248081056759544	1e-08
Aox3	0.7175218168240938	0.561408332809784	0.7883690618205307	0.11828735208311579	0.127276326946201	0.1179632750454766
Gstp1	500.321704418056	516.810635737434	494.17870100634735	106.72428525443492	104.0905111195828	101.34004741539319
Cyp26b1	2.9714864728541537	3.1311497328908082	3.0769457780764045	0.6945624849376241	0.5970518141537836	0.89206155366698
Cyp2d4	2.4153582788750283	2.71704528696415	1.8534089901609923	0.6625118167925964	0.4320350826073976	0.41455479841375087
Aox1	23.936221138782944	24.267489818808752	25.96480936744297	5.97336085461032	6.108583963554027	6.482612613067522
Gsta2	0.5231234668357057	0.6287413149745243	0.8671046223774811	0.1113551636633611	0.1633872819867511	0.1110500790474626
Cyp46a1	2.1315891549131547	2.269126301412144	1.8976228575351808	1.277613083933459	0.9780491091318281	1.3405881985242412
Akr1c12l1	0.0584647498152965	0.07739740091473829	1e-08	1e-08	1e-08	1e-08
Cyp2d2	0.042434095349812004	0.056175535663923	1e-08	1e-08	1e-08	1e-08
Gstm2	190.81332753780092	209.34083083854833	197.98897462861916	134.8681416964187	122.22953430163864	122.6735895171186
Fmo1	0.2286173029329181	0.3999310109852946	0.1769575104273509	0.16511282405256988	0.0215345776488285	0.0109773731472204
Fmo5	1.4855312932444755	1.369008279802114	1.2757156123551066	0.8547521340468398	0.9903288705921393	1.1503401533218094
LOC100360601	0.08426413678005369	0.016732719957545703	0.051363341418526	0.0340802349645873	0.016668225173025603	0.016993436936088503
Akr1c13	0.122004312468306	0.07454446498327949	0.095343490833702	0.0474462209346465	0.0649749985956032	0.09463245092431409
Gsta3	1e-08	0.0320292436380814	1e-08	1e-08	1e-08	1e-08
Cyp2f4	0.027726262488518803	1e-08	1e-08	1e-08	1e-08	1e-08
Gsta4	15.901209083811368	14.156232477308597	14.978628608764915	13.38656579447718	10.072620361871397	12.276297476840226
Guk1	48.80832100879353	58.675761815972606	52.69919278843204	43.89551035604244	43.69980796921192	41.58829290085197
Sult1b1	0.0855427109580747	0.0169866122329131	0.06952359443451739	1e-08	0.0169211388425585	0.0690051107086834
Gsta6	0.4437573084919873	0.523725548151401	0.5699065638758779	0.465620481028729	0.4223341536432639	0.43057426993826997
Cyp2d1	0.0140190861546448	0.2087873766993941	0.07121125989444349	1e-08	0.0693275479458288	0.07068019012197879
Tpmt	5.401053756622969	5.512710388668253	5.113916369436064	4.336094508602277	4.7222300759674445	4.825257230084661
Cbr1	9.75926620687095	6.875835550131843	8.776882790908942	7.07148221030167	8.883788649974605	7.052108159259232
Cbr1l2	1.1176119763092083	0.8463404796526641	0.3463943170865396	0.5362864300427473	0.4683768563620199	0.8595275444273607
Aip	28.458090119878875	30.63660625101877	27.113898268839232	27.75959187258833	26.161134927131485	25.69389062646285
Cyp2c23	1e-08	0.021647760911926103	0.0443004892161013	1e-08	1e-08	0.0439701110040597
Akr1c12	1.5370413825475862	1.5067688549034008	1.1068931669459403	1.4754329211106807	1.7511213337035252	0.7455045819948806
Cyp1b1	83.85870859884001	79.23995443960555	84.06546499133611	78.4142971896172	80.32492930095164	85.10490384684269
Cyp2d5	1e-08	0.0143613157363175	1e-08	1e-08	0.0143059613244355	1e-08
Rora	1.4724691167827364	1.3337672790013981	1.3858853068945975	1.2866716399575544	1.5222556589644325	1.5519562260793471
Vkorc1	61.046407210806215	66.78967169417997	61.11048114751563	70.53343487555674	70.19340340010324	62.681927123825204
Cyp2c11	0.11873742558810739	0.04912131691674	0.1909937601347753	0.0800379808737907	0.0587183777010472	0.3791387747796781
Cyp2ab1	0.0289641930277615	0.0143788830827839	1e-08	0.0658936559751082	0.0071617354795415	0.0073014671392062
Cyp2r1	0.0609067483793602	0.0633522962307372	0.1119667037953252	0.0762463731771421	0.09753071049184629	0.105282657529074
Gsto2	0.409320566576471	0.2477124366352509	0.4079159635853361	0.4927016489039893	0.3007358843516426	0.4795593302362438
Nceh1	5.867719934632409	6.253062805704337	6.424539296667796	7.327061861268928	7.254304274473053	7.709446845962473
Aox2	0.100130473583064	0.11511420202932089	0.032123526867584705	0.1119004148052694	0.0833967331448065	0.3082115303698773
Cbr1l1	0.0288173158318804	0.038149231079678304	0.0195173813706637	0.0582751208420835	0.038002188203815	0.029057735977936403
Cyp2b1	0.0048087467232321	1e-08	1e-08	0.0048621866932621	0.07134091876757	1e-08
Abcb11	1e-08	1e-08	1e-08	1e-08	1e-08	0.0043035004191067
Cyp2b21	1e-08	1e-08	1e-08	0.0128165828252797	1e-08	1e-08
Cyp2c22	1e-08	1e-08	1e-08	1e-08	1e-08	0.0680997385944223
Cyp2u1	4.140453714952147	4.274446826427596	4.750087533696648	5.90505925772958	6.032126061632074	5.930393662559478
Cyp2s1	0.0755286212446414	0.3124595726043564	0.0639424879753934	0.5282117902027326	0.3299305370758513	0.4315662007160828
Cyp2j3	0.0113103609076642	0.0393040946506955	0.0057452118663346	0.2058488013433043	0.2349155527179942	0.1083447752397623
Aox4	1e-08	1e-08	1e-08	0.0049100506147708	0.0048028898847623	0.0097931867207565
