# Supplementary material for: Peptide-based Self-adaptive Implant Coating Sequentially Regulates Bone Regeneration to Enhance Interfacial Osseointegration
Source: Research Square preprint supplement (doi:10.21203/rs.3.rs-5132912/v1), 2024-10-01

transmembrane receptor protein tyrosine kinase adaptor ac...(GO:0005068)

Heatmap of the Analyzed GeneSet

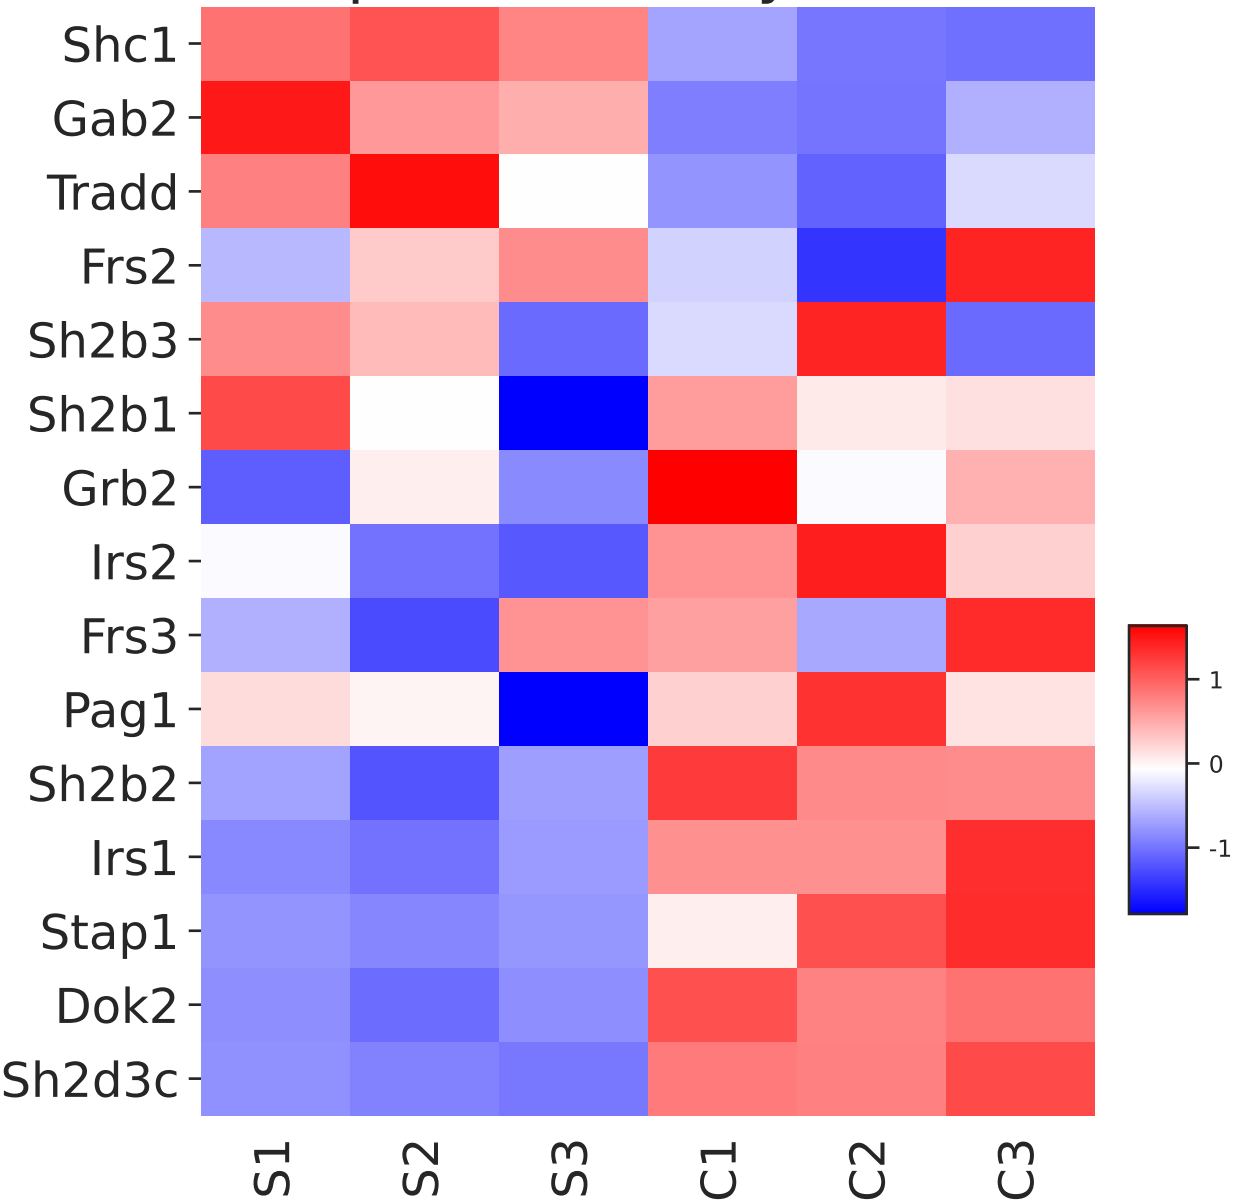

Supplement: Supplementary file 112 [file 504_transmembrane receptor protein tyrosine kinase adaptor ac...(GO_0005068).heatmap.pdf › Source data/1.RNA-Seq source data/1.BMSCs/result/1.6.GSEA/S-vs-C/go/MF/504_transmembrane receptor protein tyrosine kinase adaptor ac...(GO_0005068).heatmap.pdf]
