# Supplementary material for: Peptide-based Self-adaptive Implant Coating Sequentially Regulates Bone Regeneration to Enhance Interfacial Osseointegration
Source: Research Square preprint supplement (doi:10.21203/rs.3.rs-5132912/v1), 2024-10-01
Supplement: Supplementary file 113 [file 4_iron ion transport(GO_0006826).heatmap-data.xls]

id	S1	S2	S3	C1	C2	C3
Tf	86.09698184087955	92.56079599295572	87.63550951687795	6.246479986657218	6.273634034133513	5.948107220563589
Slc11a1	16.810693302620713	15.258139902537028	15.505305681967545	2.311065265411083	2.4168912100887145	2.2834917545369042
Fth1	14914.332884871563	16299.8905266539	14676.117161457576	3809.538481670412	3841.849768844073	3548.319284142597
Slc40a1	8.499873721608497	9.131150020092925	9.209930231925037	2.8810550419167114	3.227596867943406	3.005341039466297
RGD1566189	1.9753509337264838	1.5483726218782732	2.2180389320689504	0.7621288608134542	1.028269705635609	0.7076242150719215
RGD1560687	4.0331033527530105	3.539335917888125	4.440952664955635	1.6837878280306038	2.0330643431098663	1.9415457226869564
LOC100362384	20.077730061775775	23.26120557331533	17.044363794397228	8.797880260361861	9.916531973630939	10.034376365217927
Ftl1l1	1.711678537122537	2.188722777447865	1.5281481944818132	0.8915730365927382	0.8721146198745168	0.8368285697442966
LOC100359668	7.289582907712901	7.340289139083634	5.462307132907586	3.580748974142252	3.630431897740547	3.4927429022024
LOC100360087	17.95211423563811	19.411948569571518	14.621764061855565	9.388767867891238	9.05630613519156	10.091281883572258
Ftl1	3550.724809984261	3383.20598950582	2984.75692629994	1822.522812197148	1926.2764799390402	1863.586854963693
Steap3	16.707717090965797	16.84866679335761	14.763291758110693	11.43427310567684	11.616436542716572	9.899707384840875
LOC102549852	0.5328432083166267	0.7935681953283301	0.3721614197858977	0.3704007672627976	0.329378945556976	0.1343221750925708
LOC120102993	1.9233680146810503	1.187085679106676	1.0826142457717496	0.8146894712143821	1.1825101599809504	0.7600408228550268
Tfrc	24.3431169902717	22.145709181125756	26.47711890101344	19.898793620061753	19.170310431486328	20.871996915137174
Timd2	0.0107238413519905	0.031942207677108404	1e-08	1e-08	0.0106063697455167	1e-08
Nectin1	19.468479670051828	20.122501760216352	19.02668040552556	16.882377129043938	17.36980166578077	15.52936400889358
Mmgt1	10.652600646060703	9.69958598261039	9.748762818153647	8.920359698243697	8.542937856349448	9.163729311719537
LOC365803	0.07353485355650649	0.2920429601907053	1e-08	1e-08	1e-08	0.1853708550714632
Slc11a2	10.98020247563914	11.514748875580608	10.589356903481297	10.722551358603509	10.326317831269833	10.127397894577248
Meltf	0.0056363393561521	1e-08	0.017178177256136403	1e-08	1e-08	0.0170500682089058
RGD1563378	0.0273736743065839	1e-08	1e-08	1e-08	0.0270738161480936	1e-08
Sfxn1	29.631947725686732	30.325541391075962	30.21167653320952	31.765682563446088	30.80201166700198	31.984948617575068
Cp	8.652866172815683	7.853509343006724	8.511915258425507	8.783698831430467	9.00463814968981	9.78543295886729
Slc39a14	15.382490411014585	15.118242552522045	15.802827968579527	17.179491769389394	17.373011816947095	16.74986397589915
Hephl1	1e-08	0.0044703384826681	1e-08	1e-08	1e-08	0.0181599376251792
Inhca	0.23638822589213068	0.0586758606414769	0.23014505364804058	0.3485638749404296	0.3117316881111613	0.11918020057506379
B2m	252.42095476782066	270.51943267371985	267.8684790070062	348.255784914839	350.7704676449791	368.932130165915
Heph	0.4977143687822036	0.3996307076060529	0.4836533866363978	0.8927137807320454	0.7062893506117097	0.7768024487582517
