# Supplementary material for: Peptide-based Self-adaptive Implant Coating Sequentially Regulates Bone Regeneration to Enhance Interfacial Osseointegration
Source: Research Square preprint supplement (doi:10.21203/rs.3.rs-5132912/v1), 2024-10-01
Supplement: Supplementary file 117 [file 5_glutathione metabolic process(GO_0006749).heatmap-data.xls]

id	S1	S2	S3	C1	C2	C3
Gstm3	0.0081228983791406	0.0080650039932596	0.0082522090443715	1e-08	1e-08	1e-08
Gsta1	306.03792153875213	305.6026456078112	307.3784159785956	25.678036869004604	24.28845391676968	26.45302789980771
Gsta5	2.0317116515686466	1.2452043262262593	2.064055070764603	1e-08	0.0248081056759544	1e-08
Gstp1	500.321704418056	516.810635737434	494.17870100634735	106.72428525443492	104.0905111195828	101.34004741539319
Gsta2	0.5231234668357057	0.6287413149745243	0.8671046223774811	0.1113551636633611	0.1633872819867511	0.1110500790474626
Gclc	34.49534351105496	35.310309060110754	38.15925079844774	12.333020209873998	10.77739325168213	11.710366736207344
Gstm1	45.53356173657048	47.60950914159571	41.930834386865364	17.383676510575278	16.833479050644716	16.562118897759337
Gstt2	8.915766994142976	10.588618807247506	9.458328754669271	3.640612021513944	4.239471827179759	4.166588951125471
Oplah	9.7162259166727	9.77976768457762	9.303424472120485	4.30620949644359	4.601287668911414	4.3737418478522745
Cth	30.606826932517592	30.92387829686472	32.75027921353642	15.313961397751966	15.616895970044027	15.364803705498042
Gsr	31.639221044314738	32.404927902106515	31.349725024476232	17.13424760016886	18.089473346522333	16.880811046501314
Arl6ip5	94.38447047159599	98.3310503637737	96.76557977190416	55.33187649177329	51.547437955667505	54.42967936816144
Gstt3	2.7164583350990688	2.5384444997557747	2.2874538954129866	1.3806672833352938	1.5660452938484712	1.3329414829531325
Gstm2	190.81332753780092	209.34083083854833	197.98897462861916	134.8681416964187	122.22953430163864	122.6735895171186
Slc1a1	0.3505523866852571	0.3353973846941169	0.2849063490124073	0.2513359355631987	0.1386849443198443	0.0771222652200413
Gstk1	15.442317156866364	17.245510632799856	15.366339812473305	10.889714702697928	11.513611450671727	9.475777362165873
Gpx3	480.7820620330932	521.9704307845308	477.1120587436126	335.53312908646967	342.96932226730803	316.388431135584
G6pd	176.03552063079954	185.07424321680028	165.43586536021175	128.1649342683324	122.96607704568807	112.71279863880531
Gstm5	57.71216179150389	55.46675787139734	56.18557516785085	40.29845609223954	41.1352242235911	36.660305605650834
Gsta3	1e-08	0.0320292436380814	1e-08	1e-08	1e-08	1e-08
Gsta4	15.901209083811368	14.156232477308597	14.978628608764915	13.38656579447718	10.072620361871397	12.276297476840226
Sod1	252.26410909380928	272.6012017096636	240.69963390859544	206.81650059654024	204.7887688347477	204.4500109767816
Mmachc	4.722993060795815	4.406714882412333	4.401901545215932	4.189204688889448	3.638991981957812	3.69936161557932
Gsta6	0.4437573084919873	0.523725548151401	0.5699065638758779	0.465620481028729	0.4223341536432639	0.43057426993826997
Gstm6	0.2286746508052204	0.2889661248945785	0.4646299702419197	0.27325519392370007	0.3289740899733238	0.1257722567701727
Gstm7	7.089756423830128	6.436418892801024	5.610881052551473	6.019994090593286	5.578682051036465	4.956837872817468
Mgst1	51.87658773490025	57.53424392368	55.479048761836644	49.45046317094978	46.5257799760386	48.6260027746506
Gsto1	37.64005338831383	38.39298650302365	42.06318219626341	36.79711499758453	36.0373128192774	35.43851973402807
Hpgds	0.0152861427470594	0.0455315609819595	0.0155294872203634	0.027048025859160503	0.0151186945178185	0.0192670894425471
Gclm	8.179169961176264	6.856925111352601	6.935257894377122	5.824443296034541	6.106526098322033	8.552273304686812
Gstm4	8.724759852552545	10.708853470305307	10.236238399082136	10.129926645841307	8.572564630310662	9.270908699893225
Gpx1	226.0359273551316	234.0095230293477	218.2146676686832	215.551149902574	222.8650269053347	203.70487721677742
Gstt1	2.353354628552995	2.6142899875421732	2.1066637354923627	2.5550451447686897	2.2035652138620483	2.129854389266712
Glo1	112.01619285226907	116.87989443776536	112.85218478846092	118.01861751597318	119.38891501445808	117.65154820784359
Idh1	48.83632798696488	43.54216423508815	47.61270048706892	48.38851942406831	46.703685988572	50.6939655087968
Gstz1	8.609145216048631	10.084191578734918	9.819196632763465	10.927590815553906	9.972442719108361	9.795503118172581
Nfe2l1	75.30132243681179	70.2307844115572	71.02362178209505	80.67952431288212	78.77484749475147	80.44959410215299
Gpx4	192.22729921086082	218.71419042199312	189.44756327563223	223.44568076604168	229.1803622570777	215.3213148716599
Ethe1	13.075666276653752	17.796197407039816	12.83605240979421	13.518078074676286	19.71348258180373	16.690813903855446
Gsto2	0.409320566576471	0.2477124366352509	0.4079159635853361	0.4927016489039893	0.3007358843516426	0.4795593302362438
Hagh	7.3205583162969905	9.52408726621927	11.147096285587528	10.430740931864024	11.534653689064669	10.96214932769871
Txnrd3	1.5314694791107142	1.4360789799460303	1.4780569257932652	2.004432788572072	2.263625084944005	2.1447866471904837
Ctns	3.8543799722986574	4.201379359480115	3.5886486200651597	7.487487663568853	7.415056921131432	6.771293070217272
Sod2	36.096385181968124	38.65114198566309	35.09840084574602	76.21815387892553	73.12576042991049	71.00294040438285
Slc7a11	0.2494349971314409	0.3135659624241975	0.4107626642420311	1.3301884524947083	1.456341236476079	1.5314079157114406
