# Supplementary material for: Peptide-based Self-adaptive Implant Coating Sequentially Regulates Bone Regeneration to Enhance Interfacial Osseointegration
Source: Research Square preprint supplement (doi:10.21203/rs.3.rs-5132912/v1), 2024-10-01
Supplement: Supplementary file 121 [file 6_DNA replication(GO_0006260).heatmap-data.xls]

id	S1	S2	S3	C1	C2	C3
Rrm2	19.7137636759507	18.402453444244202	20.762550454704872	6.568695249164418	6.089042115928487	6.806015469998706
LOC100359539	4.682393189080845	5.241542490400262	4.738278951018323	1.921621225117444	1.7434733427163203	1.5553038075937768
Rmi2	0.6771380217944445	0.6866163528882783	0.9660119200375052	0.3059133162306514	0.35623430142228457	0.2397019387775319
Recql4	1.208902730186691	1.0040858232845384	1.0332972700662808	0.346720708139356	0.4656176407722583	0.5391679937405034
Fam111a	1.5055898853275311	1.1853508078328627	1.644106198319243	0.4426133518720153	0.3739142991125369	0.7757951702363356
Dscc1	1.2396244492013901	1.4520547373452568	1.3159587746670007	0.7886565100628637	0.5648073835542005	0.7022283878001313
Pclaf	9.029829528082876	7.229300497347883	9.55217016775365	4.463643033963543	4.082703755528503	5.549814598715807
Polh	4.251937306781327	4.686399279081655	4.546079946953976	2.287642128916167	2.6180160375589483	2.5229979896415164
Rpa1	24.73219407314975	26.08167812960536	25.38747117063521	15.179943638339742	13.050255328275787	14.335194193308284
Pole	1.7805606873116353	1.629654774507568	1.8089059599437602	0.9296343663966137	1.027816305339133	1.0250191734391854
Pold2	9.229697308181544	9.22213489477395	8.733250350323644	4.861791389606382	5.683621969321193	5.073156581863652
Dna2	0.6205594104965135	0.8150972257452023	0.6632736058636761	0.3137278794528766	0.5114680376953534	0.3780492486082061
Chtf18	2.3428816198980145	2.62633582922219	2.3264326767558052	1.6429594667790834	1.4127549407759616	1.3564909587540357
Poli	1.9077238660583724	1.8607011478619648	1.5105728670618248	1.0949483752277656	1.1265462162972752	1.1711571955349107
Pold1	2.8086191418188577	2.846697086673568	2.582528193363021	1.965531600677972	1.575402637110034	1.8290330665107208
Pif1	0.1763044431298371	0.2280926706690267	0.1031245686806221	0.0540193196516756	0.1056807063813221	0.0377099273999168
Orc5	8.082289937182736	7.274973863313582	9.195889997451605	5.504627212351034	5.467469889777122	5.141749368396393
Dtl	1.006006657760972	0.8306114329596559	0.8929241145574558	0.6317263625132988	0.6807803099447963	0.3790651495370118
Nasp	7.388212730179088	6.80717509185317	8.123707064289224	4.828802813268316	4.545688901283468	5.470658329756423
Dtd1	19.145693082635905	17.73946356507084	18.648003480372353	11.618879883699316	12.890593915038911	12.95246020799416
Blm	0.9449744491361981	0.6951721400910472	0.8505856999612609	0.5396211899216024	0.5907979344847646	0.5578911240422052
Fen1	5.149512131468123	4.582592609810819	4.572708677406326	2.8637065493370626	3.4425603990885465	3.5481905971447634
Ticrr	0.5627178994462972	0.29618215161073097	0.4408103904489488	0.2159349500673195	0.3319206097841085	0.2119251954549286
Chaf1a	5.223136692028329	6.299151708150138	5.6034373305175516	4.020739845141922	3.9605395196788438	4.157192006576777
Lig4	5.959856251263562	5.239492638506514	6.117351526262644	3.456491628967948	3.8453045155752528	4.976906538605896
Donson	1.9992164427341503	1.4189415405852162	1.6184870428911533	0.8212075416334945	1.081344971917592	1.5197963870199411
Gins1	2.584756928149952	3.18500448481374	2.08665620793034	2.2167924208909855	2.122760570997458	1.5125971980490156
Adra2a	5.723011322480214	6.051524055178019	5.650944465922067	4.273716189511362	4.673735410149394	4.287579344929614
Rbbp7	99.50432151895254	97.62687624811039	103.29423818449958	73.01378300076209	73.13589282308588	82.08517310229874
Pola1	1.981167705745452	1.6946869052221216	1.897694701422059	1.3207810712884873	1.274729198333559	1.6420625425683097
Kat7	17.106103164206147	17.082677290891905	15.753326979382537	13.052083653448637	12.877603798429456	12.203585497781912
Tbrg1	81.49345942622774	88.32100653104843	81.55676905116698	65.26851239504452	64.43692124501472	62.64008126277493
Rfc1	9.818640779772503	8.479864755946847	9.624069110133071	7.064172333666111	7.368712637700042	7.154271701478227
Grwd1	7.695421388188405	8.375244240937821	8.281490062958719	6.484117811856134	6.025472981428068	6.5285294598605965
Cinp	17.17482539050418	17.925831373718033	17.671659061757524	13.299577938020366	13.361480147262395	14.69927673026741
Chaf1b	1.4325730615981291	1.3182873459075763	1.5382050409220824	1.4131642817731025	0.8754707508635885	1.0452253278667964
Prim2	2.134711479995952	2.12797470530411	2.16869458395808	1.5195380607109938	1.8410774082495551	1.7995077101975236
Lig1	7.288106599742916	7.036054009034443	7.727769765843312	5.9360368875324685	6.044401926258905	5.8542169256418415
Rev3l	1.6271835499023464	1.3139079390464972	1.7016612914471416	1.1711803048315925	1.232570658321105	1.3732608462633884
Rpa2	2.416785417131525	2.5117474566096942	2.372354092644646	1.6883354389521803	2.011586677832641	2.240726615302858
Recql5	1.6407462068545513	1.396745199335376	1.4856200825261254	1.2922892222580407	1.0905266347435862	1.3801702110320762
Dbf4	2.776067138471149	2.170796659492252	2.7465278812161764	2.0272184492009977	1.6509835297435183	2.6620105732009574
Rbbp6	6.5577719166662725	6.112517562645371	6.821075603622134	4.995367497844985	5.397163096896264	6.1869269840969805
Trex1	12.558741987677008	14.543595771188208	10.471069750361082	9.881678180430525	12.604847492977886	9.573713560675126
Ssrp1	47.702656076270344	48.10247231304971	47.552142849478464	42.40344787574488	41.67898861109583	40.22299863669539
Upf1	15.970247963919128	16.396392844481205	15.571041217650045	14.52449438485632	14.02130776714925	13.061013596919492
Sin3a	7.822403565363624	7.658157152385438	7.5985826047598515	6.328229752280588	7.118075889626495	6.8732111183664655
Rbms1	14.41234043407395	13.985838422021843	14.889294997823528	12.120383578832868	12.979162105246411	13.629255674367153
Nfia	0.9140351571281748	1.0105995703365067	1.0231842870734884	0.7802612379132997	0.8966125599901252	1.0090783506529934
LOC100911055	0.4375851776114083	0.5471057969075706	0.4116215057964241	0.3441263062286622	0.4488210811203476	0.49026212181118
Poll	5.54171098610949	4.521426753033864	4.6665204520815635	4.704371989858268	4.709170638837997	4.193448904380927
RGD1560617	1.1869286063351832	1.1584949415551427	1.1445106064343324	0.9356860505527969	1.4524855573418627	0.7708403363532452
Pola2	1.963866513742568	1.8388448255086247	2.1868327567584567	1.5899662315068168	1.9838275617399599	2.0013923405897485
Wrn	2.6242575759775306	2.684853124185458	3.120998389815376	2.3217435614138333	2.3952050609658766	3.1437430500925765
Supt16h	17.565996836323183	16.237620817589768	19.46011166263575	16.93360700810302	16.048872197915227	16.84433870999498
Helb	2.7856729070817754	2.409955893758996	3.055867268499602	2.6377238788700943	2.266050090598008	2.886684742194676
Sde2	12.736862225448546	12.615132807613724	12.10358378293563	12.544313463098757	11.098977411943599	12.302493902065597
Lrwd1	9.085194366419861	10.525653018116964	9.008219841534261	9.064853214479877	9.525028921507682	9.062013014352132
E4f1	2.1596987544157744	1.966232055113846	2.0080763479181725	1.9570180727250328	1.8921330803594298	2.083525015428131
Rmi1	9.364468824174903	9.47448814145004	11.201625994523646	9.84655854126285	8.997765742744068	10.310261370473004
Rbbp4	43.68071351315097	44.43174981233948	45.02829300027209	42.34603838914436	42.94076936413627	43.96897897001502
Polb	11.635338569368672	11.026380674579793	12.006878602357101	11.228950208368628	11.22572735180917	11.38310992759318
Rfc3	6.7865133513944995	5.831085922961267	5.947496314963551	5.994765250916537	6.269611339255384	6.015940758397975
Fhit	0.2488475410928147	0.4866607542270273	0.4826353900966913	0.5260999159222811	0.3654532818429773	0.3041498806395473
Ccdc88a	3.0058929758755104	2.5786311918826	3.5030753067948184	2.712901770637127	2.755279882588192	3.5171098455541983
Slx4	5.266797950656163	5.2578176725068015	5.090901780291518	4.863239832732094	5.319734336004045	5.310738364014974
Nfix	34.33825247195965	33.029264447891705	32.13048562205697	33.007027618765754	32.947687808855044	33.094616007045346
Top1	19.078025860197666	16.981872028799707	20.900597929639652	18.19827458959606	18.647869324818142	20.416162663657033
Nfic	28.216116420714023	28.996699931722805	25.680901199485685	27.83045627579548	29.74978690842277	27.66776419581381
Kin	4.189859594434989	2.9694716487696944	4.116540815015628	3.3584792224953772	4.389329012577719	3.863482330702469
Orc2	3.0768308087541647	3.8728038903612494	4.527777713145743	4.285666836835811	3.7464576868178217	4.068038444820744
Rpa3	13.877972438659933	11.363471503165695	16.083189617853083	14.72514786237283	14.742686563363145	14.166517501365893
Dnajc2	8.348218133963057	6.466586253133829	9.281603529940275	7.956921447103737	8.552711168295518	9.011240659243132
Orc4	5.1655790522476295	4.552762880257753	6.269116273278187	5.624752695462612	5.376233655101888	6.214349947055231
RGD1563620	0.0255842559483469	1e-08	0.0129957745674462	0.0388028593316412	0.025303999538736802	1e-08
LOC100362927	0.1152224899279566	1e-08	0.702340454214395	0.4660118452821926	0.22792061650219939	0.6390107479495112
Top1mt	1.4261966285810534	1.2960854640457544	1.3295794436158983	1.3402546053601112	1.6960074397831075	1.5971316719807973
Repin1	2.7316716830721526	2.4231970468305852	2.4112028305393483	2.7846686044468894	2.76818468117033	3.121347045318692
Nfib	3.5820525271733903	3.360090938585024	3.5214231648066856	4.059345819517433	4.1505169319431765	4.611018246187506
Polg2	1.0118897375724398	0.8539760299486757	0.938048458529402	1.2021835866754962	1.2009662827231278	1.1223650240908079
Stra8	1e-08	1e-08	1e-08	1e-08	0.0153868971998035	1e-08
Stard6	0.7325381967667273	0.8414061318870215	0.7952722160550166	0.9803103937061141	0.8878845382871169	1.1586661838649421
Polk	1.304080380800458	1.0219177115605804	1.4179077240452533	1.5692105504723082	1.8600764708596367	1.6301159530044012
