# Supplementary material for: Peptide-based Self-adaptive Implant Coating Sequentially Regulates Bone Regeneration to Enhance Interfacial Osseointegration
Source: Research Square preprint supplement (doi:10.21203/rs.3.rs-5132912/v1), 2024-10-01
Supplement: Supplementary file 125 [file 7_xenobiotic catabolic process(GO_0042178).heatmap-data.xls]

id	S1	S2	S3	C1	C2	C3
Gstm3	0.0081228983791406	0.0080650039932596	0.0082522090443715	1e-08	1e-08	1e-08
Gsta1	306.03792153875213	305.6026456078112	307.3784159785956	25.678036869004604	24.28845391676968	26.45302789980771
Gsta5	2.0317116515686466	1.2452043262262593	2.064055070764603	1e-08	0.0248081056759544	1e-08
Cyp2d4	2.4153582788750283	2.71704528696415	1.8534089901609923	0.6625118167925964	0.4320350826073976	0.41455479841375087
Gsta2	0.5231234668357057	0.6287413149745243	0.8671046223774811	0.1113551636633611	0.1633872819867511	0.1110500790474626
Gstm1	45.53356173657048	47.60950914159571	41.930834386865364	17.383676510575278	16.833479050644716	16.562118897759337
Fmo4	10.702848509314192	10.271740531132801	12.176528477631841	5.21632530999286	5.4740637716613785	6.1999373982090535
Gstm2	190.81332753780092	209.34083083854833	197.98897462861916	134.8681416964187	122.22953430163864	122.6735895171186
Gstm5	57.71216179150389	55.46675787139734	56.18557516785085	40.29845609223954	41.1352242235911	36.660305605650834
Abcc2	0.2109105173503125	0.1582188450498734	0.199983527221379	0.13743060839490429	0.1529734455695433	0.0708900481389681
Cryz	3.95333494918718	3.6679068969521658	3.379440096589666	2.585970909933826	2.802325299740994	2.890712096800258
Acsl1	6.344010279664838	5.709698629476337	6.264171453634816	4.600912493328793	5.53872775177138	5.287828423095592
Gstm6	0.2286746508052204	0.2889661248945785	0.4646299702419197	0.27325519392370007	0.3289740899733238	0.1257722567701727
Gstm7	7.089756423830128	6.436418892801024	5.610881052551473	6.019994090593286	5.578682051036465	4.956837872817468
Gsto1	37.64005338831383	38.39298650302365	42.06318219626341	36.79711499758453	36.0373128192774	35.43851973402807
Cyp3a9	0.9725651130885821	1.1760918802387672	1.0387167754429318	0.7312263218389224	0.9002503992687586	1.2698537484758559
Gstm4	8.724759852552545	10.708853470305307	10.236238399082136	10.129926645841307	8.572564630310662	9.270908699893225
Nudt15	1.2734194598351218	1.0444575914107959	1.1061998951490557	0.9236923115294786	1.2047105267534415	1.1909968534084845
Cyp3a62	1e-08	1e-08	1e-08	1e-08	0.013039454497829	1e-08
Nos1	0.0078081615664287	1e-08	1e-08	0.0592119424920593	1e-08	0.023619892781735603
