# Supplementary material for: Peptide-based Self-adaptive Implant Coating Sequentially Regulates Bone Regeneration to Enhance Interfacial Osseointegration
Source: Research Square preprint supplement (doi:10.21203/rs.3.rs-5132912/v1), 2024-10-01
Supplement: Supplementary file 129 [file 8_cellular iron ion homeostasis(GO_0006879).heatmap-data.xls]

id	S1	S2	S3	C1	C2	C3
Tf	86.09698184087955	92.56079599295572	87.63550951687795	6.246479986657218	6.273634034133513	5.948107220563589
Slc11a1	16.810693302620713	15.258139902537028	15.505305681967545	2.311065265411083	2.4168912100887145	2.2834917545369042
Slc40a1	8.499873721608497	9.131150020092925	9.209930231925037	2.8810550419167114	3.227596867943406	3.005341039466297
Myc	24.14329141263275	26.62129858575274	25.31851833978461	9.374135501246785	8.739567980119672	9.582928683993252
Cyb561	0.27225286377195407	0.17763388722670528	0.3319043230756922	0.023595303729588603	0.023080340799705303	0.0627484064394335
Frrs1	21.706830103161106	21.445160277586588	22.125348311484757	8.299961258711765	8.62313454872448	9.38519601830603
Scara5	222.9985134429605	224.731323417639	220.60605011701878	90.6337885842746	90.7734826782628	91.07159657747117
RGD1566189	1.9753509337264838	1.5483726218782732	2.2180389320689504	0.7621288608134542	1.028269705635609	0.7076242150719215
RGD1560687	4.0331033527530105	3.539335917888125	4.440952664955635	1.6837878280306038	2.0330643431098663	1.9415457226869564
LOC100362384	20.077730061775775	23.26120557331533	17.044363794397228	8.797880260361861	9.916531973630939	10.034376365217927
Ftl1l1	1.711678537122537	2.188722777447865	1.5281481944818132	0.8915730365927382	0.8721146198745168	0.8368285697442966
Ncoa4	75.00983444309978	71.66217061341067	76.41714869925549	36.44878284100008	34.01104551420767	37.41324883286862
LOC100359668	7.289582907712901	7.340289139083634	5.462307132907586	3.580748974142252	3.630431897740547	3.4927429022024
LOC100360087	17.95211423563811	19.411948569571518	14.621764061855565	9.388767867891238	9.05630613519156	10.091281883572258
Ftl1	3550.724809984261	3383.20598950582	2984.75692629994	1822.522812197148	1926.2764799390402	1863.586854963693
Cybrd1	6.406803743962596	6.958140668265238	5.336229362860681	3.7107008617155937	3.9646609978863325	3.5402476869888697
Bola2	168.88076115529506	171.67681340362745	165.6577479511184	109.84059728279803	123.55763500020767	120.46203473939643
LOC102549852	0.5328432083166267	0.7935681953283301	0.3721614197858977	0.3704007672627976	0.329378945556976	0.1343221750925708
Iscu	116.49479050365463	116.75855025158474	109.10733383934155	83.2765419287437	82.49819453967395	83.28094167243937
LOC120102993	1.9233680146810503	1.187085679106676	1.0826142457717496	0.8146894712143821	1.1825101599809504	0.7600408228550268
Glrx3	95.06148197072095	94.83656578648136	98.50901397949531	75.68777006891689	73.78394035989463	74.43938915931808
Sod1	252.26410909380928	272.6012017096636	240.69963390859544	206.81650059654024	204.7887688347477	204.4500109767816
Ttc7a	19.302616908491082	20.525634967053445	19.89356152162891	16.32618597979853	16.471313001148456	15.403480262344479
Ndfip1	129.13507409070274	126.27165099676627	135.4567533133175	104.68938663428423	103.03265165362112	109.08101214077263
Tfrc	24.3431169902717	22.145709181125756	26.47711890101344	19.898793620061753	19.170310431486328	20.871996915137174
Cyb561a3	8.731500764455577	9.256380456520015	8.231415088659357	7.6200177913687375	7.683918783340786	6.742810326273205
Abcb7	4.679648145384841	3.772632546458478	4.825253853671003	3.29598088849028	3.7482015465541694	4.627945982951371
Aco1	31.214058542407248	30.24675882607183	31.84953097351811	28.20970500191079	28.754183420732872	27.04590529116047
LOC365803	0.07353485355650649	0.2920429601907053	1e-08	1e-08	1e-08	0.1853708550714632
Ccdc115	11.903686785211717	11.177678434958166	12.049448444639097	11.513616739002165	9.793334070296781	10.722388949573642
Fxn	16.00280175919318	21.53807620892053	17.762884273407238	17.678850125390944	16.970600388198342	15.897255201049779
Mon1a	6.055449197894245	6.163406909444841	5.566483365385163	5.507171900196946	5.591275494578749	5.228989831470399
Atp6v0a2	13.925218027528137	12.816903039378529	13.30913326865101	12.362790879201604	12.410399318255704	12.212058196073144
Tmprss6	0.029896751951003903	1e-08	0.0075931792595779	0.0151145037106203	0.0073923213377844	0.007536551933461
Atp13a2	6.735218003691513	7.366058499251557	6.178301037696005	7.016249060032776	6.673302342285617	5.920560745424307
Smad4	24.22833533983805	22.770940511126064	23.65371612390733	22.781894373025732	22.077776423105025	24.063270861842195
Atp6v1g1	163.2121600521967	174.52598191928746	170.6706897989142	166.72012735020462	164.89132739312822	170.37603518099348
LOC108352560	1e-08	0.0056608473441733	1e-08	1e-08	0.0056390281358297	1e-08
Bmp6	1.5935298898664514	1.4739895794267148	1.224550875095978	1.3702416693289925	1.3807485504689971	1.6617587366435087
Atp6ap1	134.01301749351387	133.40909010585165	132.0425421022251	142.2635877709095	141.82225185060582	132.6917205858544
Ireb2	10.761012133086133	10.141179143274847	11.662493368555852	11.457938308612661	10.820847893911758	12.070749252145527
Nubp1	5.479531900823549	6.5945182401127	6.027847543841918	7.208150817026174	6.043572221122839	6.607972328074354
Cp	8.652866172815683	7.853509343006724	8.511915258425507	8.783698831430467	9.00463814968981	9.78543295886729
Atp6v0d1	107.0694760657196	115.21639242273679	103.1833018462571	122.32298337386624	127.1683084825452	113.2953404428412
Atp6v1a	28.59975074196892	26.711502313414588	28.628427855539957	29.79507386954315	30.662125788038583	33.72190670671465
Tmem199	16.345728846425633	16.65100422313527	16.362012261877627	19.272606480223534	18.450101992279254	18.04650245540025
Hfe	3.6013579649697927	3.8853953796629286	3.125730409109244	4.3008427712495765	3.800303164613993	4.017419124672128
Hephl1	1e-08	0.0044703384826681	1e-08	1e-08	1e-08	0.0181599376251792
Hpx	1.5477003493826982	1.013884969152637	1.1670967319896883	1.3551712196767536	1.3571566402942623	1.6249678330226756
Alas2	1e-08	1e-08	1e-08	0.0110481678392351	1e-08	1e-08
Hjv	1e-08	1e-08	1e-08	0.0111614822786119	1e-08	1e-08
Hmox1	182.4629089033856	195.83333053188144	187.53347604882936	256.40644083247014	267.26417318913246	244.55506837417047
Egln1	8.526819549185426	9.839632498939368	9.074741630186148	15.7636357516257	14.327595113602237	13.151790701417404
Erfe	0.4033364164411989	0.2669744771583034	0.2008614012353292	0.9195912505900484	0.7196170752188682	1.0047917169124123
Hif1a	34.815496893304356	33.7448675641784	37.9120078599619	107.31731191333768	105.65789647431859	117.1165433104563
