# Supplementary material for: Peptide-based Self-adaptive Implant Coating Sequentially Regulates Bone Regeneration to Enhance Interfacial Osseointegration
Source: Research Square preprint supplement (doi:10.21203/rs.3.rs-5132912/v1), 2024-10-01
Supplement: Supplementary file 133 [file 9_cell division(GO_0051301).heatmap-data.xls]

id	S1	S2	S3	C1	C2	C3
Cables1	2.250582335118013	2.412958622147069	2.162341261215627	0.3580972456054669	0.2812607893877439	0.32720987304214777
Hmga2	16.439674623143894	14.843013846323405	17.932140420487485	4.728249793843613	5.248121235545272	5.326085183962213
Ccnd1	235.5723156204571	230.54435733474	240.2908752556232	78.22491203950719	78.42743659374106	79.86520360317166
Spc24	22.437724673213367	22.92604265454341	23.502422167947284	8.625930479437573	7.878029686861179	8.031737081089002
Sgo2	2.199520901654152	1.4808653470148054	1.8630957520912732	0.7100255792530247	0.780628087270033	0.7783031287284788
Cenpf	2.446125052762936	1.9021756899112416	2.8770824524855136	0.6616786367902953	0.7141932380370073	1.1422504581361514
Nuf2	7.508051723087072	5.913583434743948	5.713942828420977	2.669092586743365	2.7945173286305387	2.608276841829059
Spdl1	3.8093103928158176	4.1575607557987375	3.9179662245516793	1.089546842849893	1.8136748242561247	1.7346863181146555
Knstrn	5.60650153183105	5.241591794207037	5.551190828694544	2.546646868569236	2.336254712406709	2.2383529642379183
Kif2c	3.195655910560681	3.1154517812405103	3.2905990255803585	1.57903308973328	1.3514996124797216	1.3778685766392804
Nek2	2.912375518031684	2.5000448167894906	2.7198819945173245	0.8052026345837213	1.4027301552546076	1.1777283207499958
Ska1	2.1255695605125626	2.9638986110938546	2.4610890088271735	0.9955812353268825	0.6956091877653761	1.3080452127405744
Ccnb1	6.127544165985409	6.593853348265486	6.1074971496636286	2.7430520308091944	2.7189612323887493	3.2315807696778416
Terf1	3.8511352349904087	3.1941775400940764	4.341857027200427	1.3771227533211043	1.695446776169956	2.1468456423621864
Dyrk3	0.3657901398541819	0.3011761798085759	0.3172308342283368	0.0721668767298346	0.12353572682494869	0.1709267364728277
Cenpt	2.8422815718145333	2.7109204389441555	2.523745552336556	1.221959682997753	1.5273158133544122	0.9478092004523513
Cdc20	16.60411794333861	16.631549700186856	16.25825091022395	7.5171005888927915	8.026299970205978	8.277111272570885
Mastl	1.9290315892848486	1.9612495594883952	1.9649663885776616	1.1338727130635968	0.7071951180199952	0.8351071444944425
Ccne2	1.8764803973981519	1.5811887567442018	2.351586318753554	1.1359038585003443	0.7997571381728963	0.921171333537607
Ccnb2	7.447181988892004	8.610654803173198	9.166180011029903	4.11894332830067	3.8874019270503664	4.428569295804054
Knl1	1.9375164146164698	1.7168873610669049	2.446680562049351	0.8020845525956973	1.0752686196886572	1.2142170218915744
Tpx2	10.04013397719984	9.742658069064701	9.24642796025798	4.932063557690431	4.655637732096954	5.234026537627406
Ska3	2.6000857271288886	1.9676479419008852	2.601210840007632	1.2744144485610984	1.019233187553776	1.3828280375260704
Ncapg	3.597267991520024	3.3116687814774384	4.209653047510029	1.386987338621889	1.6832293016135087	2.2842678966325423
Ccna2	8.507977483441698	9.338513823572733	10.056161487752584	4.665560973017762	4.663763055729668	5.098935374699298
Kifc1	3.883529661903017	3.885798875443496	3.807456897429453	2.1348981789599812	2.2150943311706994	1.7640692597093743
Ndc80	1.9752373866805144	2.005175290017522	2.2618956656860925	1.006064982664817	1.0620569322687778	1.2417185894260694
Kif18b	1.9354017855946835	2.0425479028456532	1.94558741801917	1.1084595704729547	1.084267645190729	0.9484799509783997
Prc1	12.117273651474157	11.803911720636878	13.757972234295963	5.6559243098439085	6.911837282513233	7.569239911038427
Ncaph	2.164730860042769	2.2743524467328347	2.3911213211996554	1.201843448723743	1.0666161661103177	1.3969862509428144
Ccnf	3.0316607637092514	2.7439711153346216	3.23306799447902	1.5806602907201934	1.6289928144894583	1.632627174609595
Spag5	3.2607461464282457	3.183447242980696	3.810475056727817	1.7677701870242577	1.9984397990254807	1.756826856044682
Cdt1	1.818961053114585	2.2574959280105547	1.3537071055816083	1.0479022376404732	0.606651575185287	0.6504786413342887
Pimreg	4.607653558686613	4.250058090838368	4.363158199027984	2.4732213808535106	2.4473745225222663	2.20832901069759
Cdca8	11.910258319067484	12.786093176327137	11.10238164738909	6.201157049792885	6.276925294779472	6.930285118313554
Birc5	3.892487234021695	3.99314106925691	4.716440488945464	2.4059038215360826	2.4685071467523163	1.9820405651453183
Hells	0.9945922473470225	0.7250025539002543	1.0424009444511266	0.547376532992303	0.40468557444943887	0.5839612929346831
Ccnd3	102.36404431039183	110.64661880553419	97.42762331666175	59.48700703574378	61.07934891591518	53.58569802936757
Cdca3	4.76844898944305	4.292424460242359	4.3206448184149036	3.080036175156798	2.1321459706781702	2.3509535994090487
Gnai1	15.41943964998212	15.661614444393768	15.810166904499367	8.41995588023637	8.931969097024508	9.175444905826161
Mad2l1	3.0640968639936017	3.187415522584354	3.1933271699179318	1.687659413732597	1.596602329088439	2.076153474800388
Aurka	4.564909144572717	4.157649797667525	4.646708377780113	2.153359347729248	2.86180920409052	2.600510260692099
Ercc6l	0.6274728300676701	0.5701043541410307	0.8238892473412486	0.18554553479157548	0.2927355389762624	0.4476706008475837
Bub1b	2.5936890606831686	2.500092933437683	2.6349787646519056	1.3604286159717114	1.5017559870393378	1.5746453866006593
Kif11	2.5024539970212527	2.4249873816532794	2.476191729379635	1.4118873261058378	1.524625550895182	1.3777391355000672
Psrc1	1.1387329977250122	0.5775977632914446	1.005965936370853	0.4630581633675054	0.2815647634324741	0.436827908370181
Cks2	16.64394335043746	15.64752853442245	14.253463448693513	8.78368006925766	10.150699521254817	8.333262090712598
Cdk6	19.141701453881698	17.061484729892268	19.08589690279556	10.631079311801965	10.246962239943441	11.540284350250786
Wee1	3.3626699744502164	3.1309000646962297	4.214732461619324	2.0268562885730437	2.014820857638624	2.26986254880946
Haus8	2.93998907521047	3.8396535256161934	2.9063780110643673	1.8636300769209608	1.767037778032453	2.097965975385684
Haus5	2.5544663621462402	2.4563204525777125	2.2902594678107113	1.3839363169661316	1.382689000033165	1.5572755532266283
Cdc25b	5.801015644082527	6.237803499304852	6.066476584706032	3.850393636826672	3.5465330769464583	3.3318495472218994
Cenpe	1.8181163326766647	1.899050492665623	2.500968097216545	0.9530893727448336	1.3848555400191132	1.3626596114462222
Kntc1	2.105546315453509	1.871877614572824	2.0034667076714667	1.3495692342177366	1.1055964272158727	1.1238029212596234
Cdk1	15.272179921277324	17.267849429080112	15.51530227525721	9.598524579023922	9.299448489796799	10.028917301520467
Pttg1	4.751221711108227	3.72748636208867	4.0039181246242	2.031865264508764	2.619212637682348	2.9373473955613383
Kif20b	1.142495528706639	0.9277383807204133	1.7161530909474432	0.552841984330766	0.500419869976654	0.7611608744430167
Sgo1	0.8864263212157493	0.9364354236618109	1.0446236191883014	0.5807876712900373	0.3857551245539247	0.6793044904715256
Cdca2	1.548938644332809	1.5930206934025002	2.098128872775054	0.886924879858002	1.1970240722147751	1.1420061127952428
Kif14	0.5412726946989735	0.4690166182863198	0.6731978990686189	0.2321827562778589	0.36987366257183607	0.3837058456946131
Ube2c	14.120039236033772	12.324748366671969	11.34974794861532	8.001371306977425	7.397039326726524	7.948157638678813
Gpsm2	2.2291425951051345	2.0806634928771204	2.395079953250205	1.5787793686631852	1.0972819928003936	1.5174835457147304
Mis18bp1	0.6093838792916176	0.6195615827331743	0.7032803786301647	0.4830663241212722	0.3037651049228665	0.3932594680227212
Fam83d	1.8302375554144978	1.992069176388152	1.8671534548390447	1.2930811200527108	0.9618994195727121	1.3590344901927507
Epb41l2	17.97075997122768	16.942952600889008	18.701992040570026	11.464477388280441	11.099930076355609	11.55715620367445
Tacc3	3.901686886327017	3.6813171308693464	3.98118407823745	2.491608459109368	2.758808464240276	2.237454243867631
RGD1562067	0.1430708234452875	0.11837592888394649	0.0242247433477774	0.024110138940204	0.0235839398268892	1e-08
Cdc6	1.1190998154750487	1.6626886050333796	1.1123773609522782	0.8466172272433714	0.6449936270575248	0.9254801842105776
Cdca5	1.5897578156941832	1.2824720293251934	1.1336518470865338	0.6723364042134184	1.0734266107651196	0.8015105148099626
Bub1	3.1825564112359	2.836302300771473	3.579821702112984	2.074917706593962	2.3569931723379063	1.8946574783613863
Bora	1.2026456724333396	1.3620844536727548	1.3998408800536521	0.6721667747112025	0.6037016624063809	1.084708060649922
Spc25	2.908607516279652	2.256822362349511	2.714140015985928	1.6120659743167205	1.8112844477057184	1.7923117476973323
Cenpw	1.212750796549655	2.2026350028499477	1.5926589623550034	0.7327461335749592	0.8191475239373239	1.207955633024086
Pard6a	0.530976203417129	0.5601412536383745	0.5731432806991331	0.4362125600898309	0.36104733375488557	0.20077728970739558
Oip5	0.8084369471272984	0.5083608130918252	0.8213066941012414	0.3542158535004868	0.2221058741701536	0.5615695928538228
Ccng1	221.6112544195417	208.15941161000023	233.60885266067268	148.4843325047491	148.15822945959954	160.41856136988375
Mad2l2	7.203623225691133	7.13953156889208	7.161758663836398	5.206336546381063	5.0673091666823735	4.764794729650348
Eml3	13.101600614189422	15.197211442108497	16.98767999779493	10.212167829759771	11.226900196469305	10.259293743422239
Vrk1	4.767116158153039	5.036427963366995	5.849221922948147	3.9496689278564334	3.4423317971798175	3.593498628218811
Lig4	5.959856251263562	5.239492638506514	6.117351526262644	3.456491628967948	3.8453045155752528	4.976906538605896
Cdc7	1.982097286664931	1.54322847519021	1.9846774862812366	1.3120527540070224	1.3045726775244455	1.3084580653529696
Pik3c3	3.667386609764701	3.602234618268305	3.451658688836476	2.4579688405026903	2.479459253104619	2.7233005471618323
LOC680933	0.1141769413857382	0.142219242582349	0.13075750020596769	0.0335842401071332	0.1026601990149964	0.0941968728821848
Nsl1	1.0600005798219476	0.711308078556491	1.017461247840381	0.5248028567648064	0.7953296348814787	0.6707917978708263
Cdc25c	2.4377000290796165	2.3724774874015107	2.5703444698093803	1.7257593665111304	1.906554337118127	1.721031227641095
Ints13	7.22999073525041	6.94874958272077	8.961006257785797	5.760546615693633	5.05560963409081	6.029086277781402
Ankle2	6.676234997078514	6.186542127219635	6.813081600568056	4.359334961450223	4.689719894793795	5.281792461779031
Haus3	3.7128569334773367	2.87492380566432	3.7482399645031537	2.479134718037848	2.27490727660054	2.8019881920308984
LOC100363321	0.264240209601886	0.1596954999878335	0.1634023598305688	0.11616380445716949	0.13635425930480918	0.1390146524757174
Ralbp1	27.66191213560124	26.76848383736669	26.47983416331986	19.91935290192945	18.93091087341265	20.625380741136055
Smc2	5.112103624616191	5.3850580301979525	6.541052823041168	4.0108055002081695	3.9191055802175057	4.65796089123587
Cdk20	6.201704536655629	5.203367429997632	6.096092994946768	4.383788079182439	4.144438834581345	4.439382430486342
Pard3b	1.1345011562695104	1.2997098549950576	1.2855494935415839	0.8045334508306798	0.979910376914578	0.9912648268794917
Smc5	6.0965774258200325	4.901988435116072	6.3043017750143155	3.8040245289584456	3.998057382413232	5.174520849767449
Klhl21	6.615063978396541	6.371492666654085	5.954123217101093	4.744514566280833	4.475872745469955	5.024508225466004
Klhl13	9.498011456175131	9.513232161633061	10.593772660238537	7.385624685608021	6.993164774633968	8.106420051494299
Misp	0.06923457030758799	0.0130935535758016	0.0703367357729328	0.0066670548447848995	0.032607699109023905	0.0199463465457013
Zwilch	8.721876195172873	7.385294231716569	8.512448961270884	5.997431114374157	6.047896325819348	6.672351801757476
Smc3	13.85349412211992	12.370925108765741	15.046497380855165	9.508473615346357	9.789929206505125	12.340938436208525
Cdc16	24.857475658468246	24.34137801442713	26.335618837935172	18.47113950080017	19.684514042340023	20.03728453059317
Stag2	8.359664523535637	7.521750452639007	9.680814826247142	6.474236993579639	6.2566757934926525	7.029906348411625
Map10	0.6273499033993688	0.5302885248199649	0.663174853001938	0.5057429832258276	0.209620868558011	0.5300026667857776
Haus4	7.362428279923339	8.243875490922768	7.408847785677988	5.68299034359949	6.213631051732534	5.936739969057706
Ncapg2	1.9391374547498503	1.6351149190714536	2.0210932427686665	1.3537322271525414	1.3086451674091475	1.6986209227992557
Ncapd2	3.342150598835016	3.4371246691924107	3.1441476142328084	2.3872804476406615	2.7848581330552973	2.5737728752401643
Haus1	6.829677081053731	6.362788377782628	7.396885361805606	4.639208524278848	5.579457360246424	5.900681410752563
Cinp	17.17482539050418	17.925831373718033	17.671659061757524	13.299577938020366	13.361480147262395	14.69927673026741
Usp37	0.9445856797431108	0.7971753234434589	0.9670045326172416	0.7016186345011012	0.5910854816267915	0.8315763229821885
Epb41	6.7788243662446455	5.983527873975279	6.180003629811085	5.072233317861947	4.951339577363464	4.847897420353811
Nek3	2.162394496319186	2.278186910384165	2.3554773927337407	1.5426445918255078	1.7584924823891155	2.035072812635388
Mad1l1	5.60935989937482	6.193903657385257	5.541090408718754	4.966002223043999	5.019540812533292	3.6751996204517785
Cdc25a	3.713246637315364	3.3442592609454045	3.4537475162712363	2.67635844493424	2.890908757082136	2.7385976730393464
Clasp2	5.6021295082798535	5.008536605770597	5.865624221685817	4.3068421352462485	4.282848075239665	4.455079319884166
Tipinl1	1e-08	1e-08	0.0203512453759247	1e-08	1e-08	1e-08
LOC120094818	1e-08	1e-08	0.0203340423029104	1e-08	1e-08	1e-08
Brsk2	1e-08	0.0049275844058586	1e-08	1e-08	1e-08	1e-08
Gnai3	57.98810646257944	55.675052808917144	59.15421771532642	45.72963207795176	44.18980641733882	47.34698757856121
Mcmbp	7.892739885065031	7.7825238106826315	6.914094771939452	6.319639277773384	5.608337917854331	6.107470588867654
Cdc23	14.36695109502288	13.216874250413243	13.959532259753422	10.657538920969142	10.86648046857037	11.674804710262812
Ccnk	13.19983867768181	13.456874541003305	12.8164019293951	11.543154778139494	10.082267839156467	10.030921993667071
Lig1	7.288106599742916	7.036054009034443	7.727769765843312	5.9360368875324685	6.044401926258905	5.8542169256418415
Nek4	2.599338627520534	2.7716762548914557	3.3539669301078336	2.4845602864070098	2.5460654649859182	2.047938893651495
Spart	15.527238040715492	15.324482784240827	15.824304713214133	13.327723747072884	12.292194203694486	12.284466115839074
Babam1	37.52503851426275	40.200223080648634	37.96053211136904	32.64144777865645	29.89605914690281	31.700460332737826
Haus6	1.8135233191984004	1.5699426823697304	1.8449310655783708	1.3386348617712844	1.250124940157095	1.6775250007064217
Anapc2	48.84798065410327	53.38330505745795	46.54091741007875	40.19850068209382	41.788627903454305	39.658657026968804
Fbxo5	1.663807786495093	1.7998850616997164	1.2740278975976116	1.2805550807066124	1.3999727547632475	1.201926294813649
Anapc13	38.93866434456292	42.814388242156454	39.7159351948586	33.15760601630399	33.60872028330524	32.80639445379239
Fsd1	8.896929143842627	9.560326361605599	7.408188470778647	6.917657564271465	7.462841557266427	6.8703152211052085
Cenpx	6.7093717332327225	7.211291647343117	6.286768154051133	4.544576913977889	6.539236585755847	5.583053687695679
Ruvbl1	22.06073214656697	23.24179764277661	22.442353783659684	17.687227200349934	18.530658922045752	19.783208072756388
Katnb1	7.438481474989346	7.216332285215893	7.070684307330017	6.241649022206521	6.001128497132423	5.758320822272676
Ncapd3	1.8214015196303919	1.7945939774474597	2.0597690803412987	1.512174706095432	1.4956988313042623	1.7074176794759248
Tacc1	11.071732958351072	9.837827651078591	10.69184440218962	8.686180112164472	8.548815292662415	9.021179097743012
Smc4	8.20247599789169	7.506990990918214	9.344482943065275	6.1069757112576335	6.20344948178849	8.521880104247238
Recql5	1.6407462068545513	1.396745199335376	1.4856200825261254	1.2922892222580407	1.0905266347435862	1.3801702110320762
Pmf1	10.719706811470537	11.038895914924792	8.673735664210225	8.460047201179158	8.725770585253976	8.188162953707941
Intu	0.8420056647752566	0.8902904260447256	1.0516726548388884	0.8034507569522379	0.6381057812906213	0.8821095486159285
Cenpc	1.8866492940743806	2.164135914452704	2.235260229656712	1.51257820994533	1.7185342487143151	2.016429129579795
Ccsap	1.1291636626465869	1.182267525410754	1.2931386804820237	0.6711883711703459	1.0355730951645816	1.2075892724019595
Zw10	4.424304023012232	4.531061540147384	4.9566947877305445	3.56220899137638	4.136788592488082	3.928348170517205
Mis18a	0.7325381967667273	1.6685511330640936	1.2914053354287884	1.002095068899583	0.8523691571556322	0.9558996034385773
Ccne1	8.599725395166304	8.181705480210532	8.018386748114342	7.007798397909125	7.336299120907801	6.427641059859253
Cep63	3.2750252866921516	2.8143635079449023	3.2261196067030697	2.474586821869488	2.666501858100608	2.682710461403862
Arl8b	60.523336748655694	57.5733784974199	61.406292823647654	50.51169681384932	50.130591835221885	50.141504152607155
Entr1	26.85529720515798	24.451819720429175	27.201615779805607	21.547222243860375	21.729128388693706	22.69708785651716
Rps3	872.5958787983252	904.3821339428732	898.9404560785989	760.0138798880846	746.572105117813	745.7168067747499
LOC102556298	0.1735483214795355	0.2739309185513644	0.429475713883215	0.24296812389430988	0.14523996423742389	0.2512766180307179
Lrrcc1	2.2814225499759186	1.822407930472872	2.366280273223586	1.5821344826392636	1.8980800499066215	2.0033641697035525
Llgl2	1.4974609826827046	1.4382399235811492	1.4033211789317304	1.205101924645435	1.2755229137478856	1.2018002538861305
Bub3	29.25410827491814	31.238594209508534	32.10493008080615	26.22148738453909	27.8184682821865	24.63891715619273
Birc6	11.560383007208065	10.653751361888865	11.334211093431541	9.521092383068307	9.194086107141963	9.803404855132634
Dclre1a	2.6709722430801244	2.2233906926603333	2.801190659021716	1.95617788097024	2.0842418204250293	2.524287393376753
Ccna1	0.3155446143597987	0.1904346016385955	0.0942846724549635	0.13137406769272938	0.15910372054889618	0.1434916722523393
Nudc	87.24527450720596	86.99049845205109	87.80790724049803	76.5338494745314	72.2309492674684	75.82093005706616
Chek2	2.1578913655332435	1.5996125815084716	2.25176139913644	1.6586178039466408	1.487217212881465	2.008517959864623
Nsun2	22.375387333360944	22.33122706524137	22.752108252826048	18.35555175776145	19.63307084652271	19.909200382094152
Ppp1r1c	1e-08	0.007782021747882	0.031850602802837504	0.0079249878343669	0.0077520266561075	1e-08
Rcc1	4.808007580088102	4.794464746498423	4.912822915956038	4.171973361839621	4.232320910861625	4.118446664168387
Tipin	3.717500108570398	4.275332171667121	5.341162344253464	3.481117106605447	3.395441108316217	4.638663519693825
Babam2	26.13072450115817	27.636988820069828	28.289672867741082	23.62999807314357	23.908321150355768	23.44327306283894
Cenps	7.592635707305903	6.167880492259593	4.939082335378416	5.522594639717772	5.253656651703263	5.325899392453722
Anapc4	15.862471949789281	15.718424527672587	17.668778379934	13.734878757658027	14.250115504378353	14.672925887714637
Zfp136	0.5640947250685642	0.34150868940662077	0.587052147712032	0.4219762992550185	0.4490539301030405	0.3884494089922864
Ska2	4.462367185529828	4.92857144881005	4.006264822907385	3.4276889620628483	4.276633011844593	3.941506843466916
Sirt2	26.8726881979328	27.54697049286992	25.646181719166165	22.591788823404908	25.161394293145708	22.29660866852428
Prkce	4.200860965792414	4.373527614445829	4.332073439388372	3.6214416864189976	4.092207820711258	3.5831385677498524
Haus2	5.5276421189253675	5.18580127003053	6.966712554034707	4.58994973105034	4.9306693527818535	5.963322512912692
LOC108350028	0.0251829077667589	0.10626450809518219	0.0639594894319144	0.019097078362900203	0.031133807285430703	0.07617899913652039
Klhl22	29.265301154245325	30.635145229028446	28.10835377885789	25.69561507620248	26.911258451717085	24.84682565910884
Itgb3bp	2.195055266054392	1.988815589021652	2.6624322649537215	1.6540381401988151	1.6344486455248488	2.6004974852090865
Anapc11	13.865875965250021	14.509526459919002	12.31868447631793	12.203874074632324	12.379913407791875	11.338874164644032
Dis3l2	2.881533574232949	3.0002954053046933	2.3792022736793235	2.5425416794467077	2.3856478031155754	2.3777824250761963
Rad21	26.181174535131372	25.41295026313539	26.949624259130438	23.14039611158748	22.83287747954576	23.513298928400694
Map4	31.338722832526482	30.635956765665824	31.080534777375004	28.04100490559444	27.484621135503502	26.874825032696968
Anapc1	13.423269959124822	12.689332268851802	13.173063936902134	11.772070477971317	11.37890314021283	11.744962548591207
Pkn2	11.148338564362083	10.003848129462225	11.270688508100436	9.31826522189332	9.15204891167987	10.336484843390123
Tpr	15.442863811750097	13.753641210050485	18.795788277837925	12.903479849738215	13.52342548241993	16.253142466685052
Spout1	4.91257180823205	5.494261140495566	4.866485124904847	3.644491316998996	5.044917552293616	4.896619509254969
Cdc123	40.86217028551872	39.81486400003144	40.22816842670472	36.74010588205563	36.60615159460446	34.205510203888196
Numa1	16.07870848613867	16.487081997271126	16.14158899914521	14.121585349471497	14.64583947828607	14.58663859447992
Pds5b	5.588967632713781	5.495054035540369	5.856240292213861	5.152363835604668	4.743624939608955	5.18401591696516
Dctn1	42.01446564958459	44.92226580171854	41.472583072697354	38.67612763015951	38.48341330270282	37.34738846322711
Ckap5	12.479101836799172	10.777256642037598	12.647589577104725	10.434744670822614	10.10420389489495	11.487198548342446
Ralb	21.42228476502668	22.046325685739028	22.13296532438784	20.13355081459316	20.287932944044464	18.13384061659593
Nedd1	3.117352816673993	2.7560261044629537	3.2994620588070815	2.6496861080531757	2.8559563902562184	2.686258367879023
Ssna1	27.96720046762593	33.18537569573772	27.896766732314205	25.78892265502761	24.648770809973392	29.172960271021534
Ppp1ca	143.1579715370416	146.61321874113779	146.62933508090558	132.76102205914455	132.08428954980667	125.65650378583899
Nup37	4.279793303489357	4.415325795527747	4.524106783244215	3.757471844311689	3.608082177240776	4.471631615850483
Sycp2	0.0350980106926748	0.023843273174798903	0.0412867571302501	0.0074711780566773	0.025578399175644702	0.0447042038122099
Mplkip	6.589257486972366	5.579292587359167	6.741075466685205	5.650658636565032	5.6186949484780655	5.7283207043305895
Brcc3	9.56253699587313	10.224718839858069	11.057995405425482	9.141588155706485	8.27901662186504	10.337088918600125
Timeless	1.9413918699486898	1.6015008873766048	1.8349235099315295	1.4990815758882627	1.7242916838393754	1.621584691511949
Rae1	18.073907297870807	18.615342358465735	18.038135211072717	16.14979182236084	17.510592168235814	15.784462083564437
Zfp207	31.672932893658906	33.81636005210807	33.93828806434442	31.61249085554308	28.55243007138842	30.17888451502804
Fzr1	17.474895653120573	18.63458671639924	15.272479098147551	16.37460776482887	15.57339961172491	14.759321756561732
Gnai2	311.9370971817958	339.3125126355445	309.9229587128173	293.29495448335945	297.86849731811145	282.7689604285942
Reep4	9.797206969346894	10.702066479488497	7.419999678105809	9.112009412378768	8.194652960446616	8.097170674750105
Vps4a	28.0248500609434	27.253629271656752	29.86227350324561	25.607018330206625	26.40263447592275	25.476822011630578
Wapl	11.018840503183357	10.125882752338052	11.970225597726373	9.804875952476596	9.22958583242129	11.211228719922097
Plk5	0.0242191231522622	0.1042014922279485	0.0082015647952073	0.0081627641894383	0.06387683868899009	0.0081404003324938
Cd2ap	9.904997823509829	7.681307902887214	10.638255682349723	8.027861318985021	7.794687296404241	9.995514104436259
RGD1560831	5.158469285488931	8.144347783443296	7.044725501343313	7.182407421286794	5.464396550890231	5.940517691723492
Ccdc124	27.217161223834697	29.788994465061588	27.173956506634802	25.93886631126584	26.384854170309463	25.15124088835164
Anapc10	6.757854796183895	6.326521891684669	6.325261261580237	5.688348750557935	6.013748363326188	6.191614508068234
Nsmce2	0.9694811282020539	1.0033459100775752	1.0460061095087216	0.9001737171876206	0.8964844347142229	0.9908797452754579
Chmp1a	48.520015892735174	54.3207550795485	50.47452034524839	45.392632090874244	50.0331946189963	46.168165524128675
Ist1	16.940089788776064	18.21447618317622	18.45800315542468	16.63934296852438	15.856036500836804	17.041879085268768
Ccno	0.0259487438358302	1e-08	0.1449900167713826	1e-08	0.0256644947321654	0.07849567524450779
Cetn2	20.239146000150065	19.879032094913487	19.878638250567278	17.04672655932564	17.730292148996327	20.94610088838889
Mis12	12.309927777033904	10.79058778933296	13.153608743609277	9.530921747429725	11.63181108680327	12.63022026986997
Reep3	21.18853411843413	20.278587581460048	21.232972086301675	18.562170796225413	20.13562517964928	19.819395288254952
Triobp	7.143459634410201	7.982403311312972	7.418721073255362	6.896416839925692	7.384512865493994	6.787636047596792
Evi5	4.063828641592243	3.546737229829076	4.261382590673224	3.518843366864452	3.7151093927733085	3.8877178818999187
Wasl	11.415134448529004	11.078005930770928	11.585950929192865	10.006315563349085	10.15948872188697	11.802593647214628
Hnrnpu	52.61335742344656	49.07097984360606	54.24913064797001	45.96204743670467	47.99239835325121	52.68958767479023
Cep164	6.838385868130108	6.958162131802279	7.558580914050701	6.889419864955142	6.656652570377723	6.550043669475484
Rnf8	3.2126634382988564	3.8164703818103534	4.1681361100245775	3.264730651493997	4.017860175306459	3.2802657201066965
Cenpv	3.7280601212009294	5.2421088291252484	5.097646727762904	4.441886011873819	4.863146840312036	3.982680784178787
Ran	111.56322650825108	117.13068813450336	115.29619884644636	110.64320721165923	109.60546379520004	104.75335571827928
Tnks	10.60226498067078	9.852436775040555	10.624143834219108	9.187528792376675	9.612706933155087	10.659474522133815
Ahctf1	7.854619690121262	7.463539642053014	7.928653359008338	7.617576645601221	6.474734716158914	7.982026235785165
LOC686151	0.0533694005902218	0.017663013373667703	1e-08	0.017987506647349803	1e-08	0.0358764410220953
Spice1	0.48527358423049577	0.3543670804614706	0.6901983131220992	0.503328838240381	0.526405298123386	0.4040854126426248
Ppp2r2d	10.315151402916404	10.512634459335978	9.266204857215714	9.371857262959873	9.032339290228192	10.275064996216715
LOC102555739	0.5441481957398742	0.0926177020171442	0.0315891895329521	0.06287947956696689	0.0307535783757071	0.4075967834572003
Rgs14	0.16363663491496258	0.3249406802190985	0.2909228183973759	0.11581860451510609	0.3965180727460085	0.189752114851314
Sde2	12.736862225448546	12.615132807613724	12.10358378293563	12.544313463098757	11.098977411943599	12.302493902065597
Lig3	9.379704093598637	9.013537378178384	8.866100156688557	8.534775832598113	8.427763893371397	9.273262423689404
Zfp830	5.042733472840183	5.937542174798742	6.387342892852857	4.788271617524528	5.8027575263622255	6.144138813168657
Smc1a	15.461726608566885	14.998135438239707	15.32788681154698	13.535254401206284	13.943906888318985	16.70999390293673
E4f1	2.1596987544157744	1.966232055113846	2.0080763479181725	1.9570180727250328	1.8921330803594298	2.083525015428131
Usp39	10.069838321598528	8.887171032092258	9.60173318814153	9.547110898610185	9.04185038637015	9.043989305955284
Txnl4a	14.613397135631304	18.416809351896823	20.71234504469317	17.385209593178303	18.026765554587282	16.621956189699564
Kif13a	12.504070225147604	11.559107712165533	12.242039197834307	11.817710470770052	11.709421169050493	11.639878829779473
Pafah1b1	35.414546179323146	33.08710465156583	38.61588019331432	33.89511237001689	33.663644570472826	36.49690871549904
Ccny	31.71190129374343	30.9368959931827	31.704569001294146	31.63679455971564	29.305721647074186	30.92698661580743
Kctd18	4.485616582708215	4.524654568672269	4.766275562920449	4.494970457078119	4.560973045735024	4.390348456828705
Nrde2	1.4783781322263694	1.771808391800925	1.8170281037679998	1.4540770463101884	1.645454565524959	1.8765912584662234
Pds5a	12.842654067880733	12.505388695088325	14.476494623528597	12.419750893491814	13.007114751110217	13.80445855022561
RGD1561853	0.1370664043571351	0.2041342284401022	0.0116040429060989	0.17323704355732739	0.011297087818669	0.1497274306404525
Usp16	8.886173628532978	8.106539144622246	10.089115325786652	8.185036683085112	8.33610399967495	10.219569875451041
Cdk5	18.3440033481778	19.062268637172597	20.66303101097049	20.688791779398763	19.915077441299985	16.93680654249672
Dynlt3	23.609719481988165	23.316757029119383	26.780793131946975	22.937067715282645	24.05117365395136	26.109081335421273
Ensa	17.95651081533679	16.932781056693877	17.31778580602101	17.18784662257134	17.64240328038758	16.957219360287258
Cdk7	23.4079203244052	22.74012213346812	24.531137519299588	22.866365563437164	21.636586443922837	25.91083765783985
Rab11fip3	4.265578560018132	4.500303509757209	4.200181591271639	4.319965061315149	4.348628128566293	4.270990415908634
Men1	11.37555238431685	12.419539392721573	11.085706224378718	10.780306969762343	12.175178132493151	11.871107453234039
Ccnt1	3.4061070022109434	3.28103606424188	3.0940256437194606	2.9059513625854807	3.4795884975357034	3.38157640291926
LOC120103068	1e-08	1e-08	0.0236066441652041	1e-08	1e-08	0.0234305937538807
LOC120097436	0.0140149372714975	1e-08	0.0142380450484421	1e-08	1e-08	0.0282637150549919
Mau2	3.818184772125437	3.367034784077662	3.801110172178582	3.503613381359412	3.662662552641388	3.8279604585375777
Katna1	5.0969464688294615	4.548151186607565	5.8204311463315	5.479765882371397	4.607194602280359	5.425718778637744
Cdc27	12.139019956025617	12.493954389283497	12.97146284303103	11.667435964207245	12.773536856312305	13.28499157400128
Anapc7	2.859924038899433	2.697260713567272	3.0882043280144216	2.9471978317830607	2.825580135168765	2.9083792970928948
Cdk2	2.404957343104207	2.7653021419868598	2.622892759286095	2.440623887621726	3.086949725567457	2.309119911011186
Klhl42	2.2119927250590536	1.9516940604287367	2.1092402659869163	2.038750825685568	2.012467844081975	2.2582987554441467
Nek1	1.1425717135436044	0.9862114905603436	1.1986749430862003	1.1552692266554092	0.9994462389005274	1.1955250925738898
Klhl9	21.09822724592653	18.20648787767745	21.91692376084587	20.00547887680201	19.86544570396859	21.896101676880466
Nek6	27.684718705697232	26.69086965071013	28.043455632775604	28.13637547442341	27.66315537051545	27.56147835376249
Cdc26	5.609941895567526	5.700249488090143	5.3826233208644245	5.605943215207104	5.3375816675373935	5.995819030704273
Fign	0.1919790887489214	0.15328284827025748	0.1519649760512194	0.1666132918401495	0.16218583734403239	0.1758358512301805
Kif2a	8.157995302722917	7.79596816955026	8.02215567255059	7.663485238494017	8.123668931625632	8.652509855195131
Fgfr2	9.543909434846716	9.444730944215541	9.449916224456983	10.434117049494004	9.39945963029044	9.203153592892141
LOC690251	0.8353126827714651	0.2956131674057506	1.0166519086851222	0.6940736101127069	0.7443641912599338	0.7922450886917304
Rbbp8	5.444594473932325	4.471678414983599	5.426439637947158	5.026396378319134	5.180841056019267	5.5022590707123324
Abraxas2	10.465598921570685	9.628580894547285	9.329316575910367	10.069618335419355	9.810701923935321	10.249576091993491
Mapre2	28.280341822574126	28.48083573092073	28.524850266481177	29.75655733062274	29.383151141261912	28.306603581966463
Ppp1cc	54.29540383265789	53.33429767653279	53.984843775241394	54.90887463354971	55.84038066153933	55.20076833211272
Arf6	59.494360373740854	55.40784238064632	59.980882528792655	59.92632352279611	61.10503853886578	58.88939737406393
Pelo	27.824709752115673	27.24490206440361	29.975429540111012	31.48474739551457	30.449245295806772	25.586942051682946
Tent4b	6.7875869304556025	5.860547889390267	6.607425991622118	5.886868268535611	6.3823883670790265	7.5572431745228705
Becn1	40.2082974867464	40.718138433469484	43.076479021619406	42.92402143165536	40.34026141300673	44.62884175967678
Actr8	8.332173510541626	8.056754631017855	8.854899526739242	8.308298312785807	8.721936419281938	9.034073194671961
Ttc19	7.816259847515951	6.720242218966836	7.38903662622746	7.091158059257095	7.617175143826777	7.974011912435857
Anapc5	121.41261327833163	129.95105030942915	119.9412916963214	132.95532084224553	128.9233609922656	122.27907051783244
Cib1	23.83418395607961	25.057984640434828	23.406967284435574	24.71550974464757	25.438191605829466	24.776467361340924
LOC120095234	0.0656606019640648	0.020059274070266003	0.041049771457923205	0.0408555697911649	0.074932312638975	0.025464776259817003
Usp9x	19.20914590080982	16.776343317734227	19.992953217621587	18.27657487598157	18.7530657356567	21.43298327061348
Dynlt1	46.09489477216258	48.73394918467184	47.16388790566272	47.17624978249577	48.66128302343116	52.996369846732534
Ino80	5.643493698302914	5.614651790816627	5.7255706596943625	6.046187734524679	6.001149211411066	5.821571848164264
Zc3hc1	10.311273026353494	10.405613814076625	9.854557681554034	11.017494812596254	9.94111209780454	11.301982050947968
Csnk1a1	32.364969698891805	29.954572920109353	34.85012210897702	32.569711932695974	33.355110759572014	36.70277300712864
Klhl18	4.587569897098993	4.608990141429027	4.416034601430323	4.904924311588526	4.618179542516368	4.923546376505812
Maea	39.34164670684478	42.18170273216468	42.189527138506264	46.25783010159221	42.170011606855404	43.82351512321249
Ctdp1	4.0435957387920025	4.316750258807487	3.976268859917724	4.864900095556085	4.171897378101376	4.283460032765677
Ttc28	9.87409669345982	10.112661678157849	8.73235269054918	10.256496098274305	10.55675753791109	10.298752988785234
Dync1li1	13.636983461435612	14.554531821134608	13.717655960838337	15.221695195860905	14.277082519617338	15.932221163794285
Clasp1	9.170247436964758	9.206920558940421	8.96925236972632	9.553316990547408	10.023408012628625	10.069635834426288
Ccnt2	4.056740242540363	3.4456111473028384	4.370397393092636	4.204049323822509	4.129795858580576	4.549342478903712
Cltc	103.00718071930677	97.49181093856531	107.4448551967418	110.2683388863148	107.16724755980263	117.02080420097695
Ppp1cb	24.80337741772975	23.851806373558667	26.61323915114133	26.230443631216	26.429772237172802	29.159633105101214
Nde1	8.999716024625345	9.075705724192606	9.505668159216198	10.123870204029775	10.362755622006821	9.610581371253414
Zwint	39.50296674788768	42.21045768200805	42.538671942384376	42.946217164276106	44.67574619008099	48.26626426589426
Mapre1	55.24624721128172	51.79591099635824	57.08185864641279	56.04696819465747	58.40791506339156	65.43662446316438
Ccng2	19.913842486043926	18.44997878479064	21.37912096101603	20.261052200415282	22.120953413222423	23.151378785871803
Dync1h1	51.434612218474726	48.66976775606154	46.15054425017822	53.143725799353966	53.34528217967653	53.990724817867324
Syce2	0.0031016892802194	0.0400344542460797	0.06302112662128109	0.028225346958161302	0.039880144940439205	0.0781889176670306
Tex14	0.0298058041364041	0.0098644629488521	0.0075700803496305995	0.0226027816708909	0.0319359116191453	0.0100181637166493
Cetn3	11.465400548209999	9.587821688514676	12.240188856439698	11.577702192335197	10.511866732329423	14.78669528345049
Stag1	2.2940100746073737	2.158153093512894	2.229827225802149	2.489528979898565	2.4141873133311855	2.5737349959299416
Cks1b	18.71958380290517	20.01362739026229	16.9608254895058	19.965965263184685	20.77805589570051	21.656827601932676
Arpp19	21.14727975861136	19.74586942945212	21.542902746698967	21.46446344309292	24.4982103976776	23.99283161100345
Pard6b	0.2228369281484662	0.19270048123239158	0.2848060963264657	0.2107769933306183	0.291491368543455	0.2826821074386685
LOC304239	1e-08	1e-08	0.004479555663751	1e-08	1e-08	0.0133384261146393
Chfr	10.61038658197387	9.745373414120182	9.54569850775517	11.327565626091303	10.90162837846887	11.413140348092242
RGD1565372	0.0849900301909371	0.050630571716479	1e-08	0.0343738190992428	0.10087083118349309	0.06855927732291299
Apc	6.282497085721047	5.789197134903151	6.269627120254186	6.619373868544179	6.687494639186159	7.411240193891069
Rala	17.342995587114448	17.53262027017952	19.62873355184418	20.19971260710114	20.104616533713642	21.545792844743385
Chmp1b	16.65240259113286	16.17146010115071	17.44973298255385	19.495511237001292	17.39526810878699	20.21563180109963
Cdk14	25.501086864924442	24.34502700611133	26.71684305385389	29.2395394803047	28.72074761685561	29.03454398149529
Ube2i	26.851946468188764	26.006950350512064	27.342769185448734	30.45744320272627	30.56717494085468	30.28316209344049
Pard3	5.3063655540386305	5.354823759430191	4.926651740888295	5.688446272757032	6.2490908807232906	5.941382477695013
Clta	64.18467266436274	65.66469117357813	63.48968157827239	74.4277222357105	76.26543977659396	71.72872090434407
Seh1l	13.147889023538955	11.22434054332362	13.784570104626347	14.495796881623187	13.822796674350075	15.614184633809687
Nek9	27.16635315206895	28.32245147428572	27.363466364214826	32.095651121171436	31.76696573889165	31.54051565192046
RGD1559908	2.7237548798093347	2.251822473557984	2.2599944389369018	3.072218273306297	2.6295217184943827	2.6370574470734534
Tppp	0.041938053969527204	0.0666226312974899	0.017042277243601103	0.1441739691355242	0.0456265182357617	0.029601560463413203
Cables2	6.4104634709676285	6.7289089464124	6.85405179098254	7.184725074533419	7.6929272380822225	8.382327261236675
Lmln	0.7213794609468039	0.7083382789185292	0.7732785697576667	0.8902924459868637	0.7292157542240228	0.9627324634356639
Arl8a	41.82181147453615	42.694386782167854	40.34559092603051	49.29928149930498	51.118105737735384	46.03113188203743
Rb1	2.4349760485294802	2.089333696899633	2.3799974592216415	2.537193073307271	2.6896938506045847	2.8998276952478252
Tsg101	30.2294053331043	30.92155455361014	30.904109325584926	35.68738625374851	37.63338897908776	35.97367251135364
Lats1	6.526471609123874	5.445741057180912	5.8187792273226036	6.952926593172243	6.879354739589991	7.309604697945286
Mark4	8.03854953737547	8.516277382006948	8.41769596720116	9.88422332834381	10.502425949175144	9.320178094152105
RGD1562289	1e-08	0.0330808601271366	0.022565826336156603	0.0224590700728167	0.021968905232740102	0.0671925939921326
Phf13	5.621715675730282	5.803435270983066	5.325419126634429	6.662925124244039	6.414406192096214	6.937486398983937
Specc1l	9.710578751155804	9.825305471330394	9.79850781369083	11.92970359940708	11.657888264194039	11.465037211951485
Pogz	4.128178372569715	3.8768855864543847	4.169999222619254	4.5872985884244075	4.844876615234852	5.135083173031682
Eml4	5.252821022207094	5.207718466297973	5.508964981662909	5.994119968563714	6.439704490951325	6.740476735655115
Aurkc	0.8849164852337917	0.7188622435668155	0.80365485294804	0.7591823713289175	0.9282666930504356	1.446606373780791
Dsn1	1.837910597255585	1.4722468534959914	1.653098528355478	1.953027733899672	1.8602310576804015	2.215236596659544
Lats2	18.828742565192265	20.697695142701726	19.75371961536826	23.768242892767844	24.718617825138452	23.843103070190505
Ube2s	61.29361916635946	58.674447712713395	58.869168467042	76.0163372391605	73.739709207818	69.51172044540539
Nup43	4.725553784630555	4.942329141494407	5.279150937721587	6.4954536821390985	6.520018609925844	5.375438544041061
Bod1	13.206717176205878	17.788769279869737	13.120996490550741	19.55565472972595	17.352033552598414	17.413151814397242
Anapc15	10.627807584701964	10.33449160601582	10.277551751963525	14.500215829187393	11.306063216527937	12.766475814119609
Syce1	0.032727334982992504	0.016247043510954903	0.01662417047985	0.016545523502158002	0.0323688314486537	0.1485016572749413
Ccnd2	23.343308466521894	27.58287835264045	23.23857769938655	33.62626384502021	30.67305232479705	27.978884273439746
Anapc16	10.8326939961789	11.627552400900415	12.380785715372841	15.985574464795954	14.967065386406121	12.63902544969479
Senp5	6.236498162030101	6.324958809366341	6.659767511975581	7.997703418311256	7.316927964059156	8.738037659533592
LOC100912261	1e-08	1e-08	1e-08	1e-08	0.0049553299995981	1e-08
Syce3	1e-08	1e-08	1e-08	1e-08	0.021825585319758603	1e-08
Zfyve19	4.695302434494437	4.161162859688388	4.234983256443732	5.178041005358992	6.162269924275511	5.197752886854733
Cdk4	94.60685663186159	95.4238353010622	89.50673794187635	117.49132124537799	125.02865519186156	113.57024263935315
Pard6g	3.2958444131611615	2.770999466355584	3.2720563849769184	3.67054827398134	3.840150234495523	4.479286152428848
Mapre3	9.30723553011133	8.480778901438677	9.266514383562164	10.992013815726057	12.461203867021869	11.722835127991846
Hmcn1	1.2492576635337012	0.987243755149473	1.0535192301828995	1.4217623448692944	1.3177163288681564	1.5795434727460251
Cks1l	2.7837906956648286	2.92279742771941	2.3079951116464246	3.526497342568741	3.8609442840652988	3.1941901717232994
Cdc14a	1.6655873219689232	1.2581586918270564	1.8432699392563683	2.281053786136761	1.856226919867725	2.2312442008857203
Sac3d1	6.624263833715293	7.451658410959714	7.302459360782704	9.654922671005563	9.705576774272508	9.237647122727918
Ankrd53	0.029286614360167003	1e-08	1e-08	0.0444181139659047	0.0144829056821898	0.0590618896418168
Kmt5a	20.40792981530905	18.12406001163001	20.471048741514014	25.11704973697019	27.18258484351008	28.97867664968734
Nedd9	17.22988235386726	18.105999187846024	18.012846265364768	25.095842506353858	23.69190788082193	26.437926971992212
Rcc2	46.82987503377237	48.01907561876782	46.54618263407927	68.5427712446151	67.74878049417516	64.33817416865104
Septin5	9.78027472824193	9.66564100930925	10.15268297242815	14.751745871565474	14.826179462819058	13.772724857916199
Fbxl7	4.2513654160078795	4.399779022673981	4.558507294057403	6.5909150462396475	6.506411405164711	6.3222161129021055
LOC100909949	1.9043893063211583	1.8349299329791204	2.3731120913674375	3.338889878955298	2.9134376042486965	2.8851459203753413
Haus7	7.828645709745477	9.32741817902588	9.82298886782917	12.998324327409977	13.529679214656957	15.192409543172445
Spag6	0.0692924587359388	0.1277688007084335	0.0703955457443148	0.2502232336373604	0.1762287565408937	0.1397411085923338
Mical3	2.0804929275546824	1.9893351913061468	2.12662977191466	3.3602758438789904	3.3946549807582813	3.707978641262814
