# Supplementary material for: Peptide-based Self-adaptive Implant Coating Sequentially Regulates Bone Regeneration to Enhance Interfacial Osseointegration
Source: Research Square preprint supplement (doi:10.21203/rs.3.rs-5132912/v1), 2024-10-01
Supplement: Supplementary file 137 [file 10_site of DNA damage(GO_0090734).heatmap-data.xls]

id	S1	S2	S3	C1	C2	C3
Aunip	0.6319148194636054	0.4797848567418729	0.6797376612687197	0.22550730705767008	0.12867496779176368	0.1874078973249957
Slfn13	11.33021735818394	9.725315550857779	12.792388941037837	5.451655605778372	5.524018233523644	5.7759843295681135
Rpa1	24.73219407314975	26.08167812960536	25.38747117063521	15.179943638339742	13.050255328275787	14.335194193308284
Xrcc1	10.640106491718335	9.93990519536828	10.468764848324215	7.502868941762054	6.957651817679437	6.121123858416443
Ddb2	0.8876207034471234	1.2164344524786028	1.2192689543384003	0.6699535348120382	0.7418851943115415	0.7941780381139817
Hrob	0.4974129690328754	0.3112043393686854	0.2838162887879321	0.1997983936233257	0.19543783078415208	0.2816996815549304
Traip	0.9257751494554018	0.5770015351627434	0.5011491811321463	0.34162897743183	0.4878925582937706	0.4020177399848925
Wdr76	1.3344591831798658	1.2340671580184654	1.6199914710269665	0.8573100841854702	1.2054867051128282	1.0152665110473515
Parp9	3.533162423573152	3.8074037703358288	3.8667565587327117	2.8406089204834486	2.684422879282256	2.752803035455937
Mms22l	1.200702423478904	1.1236305797739532	0.9487463716692508	0.655863908058052	0.9691496920974376	0.7932302001165656
Parp2	10.047085756670874	10.663843258725326	11.24563818464572	8.51908373852379	6.8455077645218285	8.44834757061081
Eloa	32.616529109945866	32.635638046421924	34.56486859843237	25.68174459131699	25.510119022189713	24.800840614889513
Rfwd3	5.724006285615967	5.333473520718616	5.383598544078518	4.174417502011649	3.9091176404333967	4.434592955433951
Kat7	17.106103164206147	17.082677290891905	15.753326979382537	13.052083653448637	12.877603798429456	12.203585497781912
Ercc6	2.473754017614434	1.9212736711967708	2.522306463588332	1.9839559632956238	1.6787273952832942	1.872311513494046
Hpf1	10.512486312187638	10.81674530691907	14.008353072002812	9.999276881400974	9.403321246385206	9.323303769587483
H2ax	23.625834193546428	26.64751930400493	23.274609302933666	20.30424908320505	21.69178905980446	20.68880804327083
Xrcc5	16.330323741372677	15.462046624142065	16.209430325428105	14.08582750648603	13.808069799836622	14.06991716545456
Cbx5	12.497179822570502	10.80824410296692	13.708317285394441	10.919746688978018	11.082891101838964	12.96112949739671
Aplf	2.93303672534157	2.498508687647942	3.168463813791259	2.498872139937314	2.8507958413998353	2.9007408173940754
Chd4	53.947065426949564	51.149902598644246	54.28916678252535	50.5004093193708	50.383347676165066	52.16056861424591
Parp1	19.405961682459104	21.474985217532875	20.333957555438715	20.535672783786623	19.524532576109085	19.08170573753049
Exd2	6.209079404939197	6.074777328514588	6.123647159437941	5.727867637150734	5.934061410579509	6.211638300605639
Xpc	5.865785218553697	5.888688784076552	5.859844983766467	5.53557412274512	5.266499920236308	6.309037789079628
Helq	1.5718146425442756	1.4665990643167996	1.3595558525595097	1.4616291730540085	1.248671954446867	1.6485798806766074
Ubqln4	9.357343857034865	8.537795027268139	8.773450342632986	8.462567625167985	9.453477642994898	8.517907461266471
Adprs	21.58896496238376	19.86873719272227	19.92564292464188	20.420570100913437	20.719912120972904	21.181500875073343
LOC100360260	0.1932915987771028	0.35641161043682	0.1683159998379687	0.1954396674499808	0.191174233004906	0.3758866868632773
Cbx3	24.214591435254324	23.0628035765307	27.62344485971872	23.923863449129684	24.967549109093422	29.214445193262605
Oard1	1.2305791404880075	1.5997406760468396	1.149519888113287	1.4446007812637316	1.3769722405511924	1.5195102589020237
LOC100360453	2.579622560910016	2.0489894242967144	2.9517226509801646	2.4984674198895194	2.6587905942798145	3.3130361869148395
Cul5	8.05795177451856	8.054343990750121	8.776298037506017	8.632983570581839	8.88116032654558	10.46394927985249
Sirt6	8.527299162214893	9.625919612348762	8.702923701306036	10.209555509674143	10.578755968031528	9.963901874534148
Spindoc	2.027086616937434	2.0642450579333267	2.059356408837659	2.697782305946747	2.03915286550294	2.3176962071686282
Cbx1	23.69407912590185	22.643402468892067	22.62119554981086	28.687936734251124	24.31293074881885	32.431380523110946
Polk	1.304080380800458	1.0219177115605804	1.4179077240452533	1.5692105504723082	1.8600764708596367	1.6301159530044012
