# Supplementary material for: Peptide-based Self-adaptive Implant Coating Sequentially Regulates Bone Regeneration to Enhance Interfacial Osseointegration
Source: Research Square preprint supplement (doi:10.21203/rs.3.rs-5132912/v1), 2024-10-01
Supplement: Supplementary file 141 [file 1_chromosome, centromeric region(GO_0000775).heatmap-data.xls]

id	S1	S2	S3	C1	C2	C3
Fmr1	13.944281413531776	11.752937694876456	16.156505605737323	4.257133154888866	4.192768518878358	4.802073695154638
Incenp	6.584859507544794	5.97311213195214	6.46405737877113	2.3953177139451323	2.3353329777092644	2.7227094122917053
Sgo2	2.199520901654152	1.4808653470148054	1.8630957520912732	0.7100255792530247	0.780628087270033	0.7783031287284788
Cenpf	2.446125052762936	1.9021756899112416	2.8770824524855136	0.6616786367902953	0.7141932380370073	1.1422504581361514
Kif2c	3.195655910560681	3.1154517812405103	3.2905990255803585	1.57903308973328	1.3514996124797216	1.3778685766392804
Wdhd1	4.056931483804153	3.338011412765785	4.048162096766703	1.8935894107267768	1.7228269844209991	1.7382394174457982
Cenpt	2.8422815718145333	2.7109204389441555	2.523745552336556	1.221959682997753	1.5273158133544122	0.9478092004523513
Mki67	5.1079984731403965	4.132741175782677	5.288136405643766	2.410833235533034	2.360454643189696	2.566182817954048
Dscc1	1.2396244492013901	1.4520547373452568	1.3159587746670007	0.7886565100628637	0.5648073835542005	0.7022283878001313
Pkhd1	0.9701955341466413	0.7949695198693487	0.9502741734149829	0.4575854135572214	0.4371197975789753	0.5219580499552497
Cenpa	0.6747355560477758	0.9304534726788303	0.9139691579855924	0.450611322229661	0.3872244916009663	0.4829750244588414
Aurkb	5.8815742707038225	6.626176158747178	6.2287651434114615	3.5659676370519526	3.123227835191288	3.1841647991633817
Ndc80	1.9752373866805144	2.005175290017522	2.2618956656860925	1.006064982664817	1.0620569322687778	1.2417185894260694
Plk1	8.508179246048215	9.04787147459503	7.48090254815866	4.858141517862324	4.5278564362995075	4.082723136744948
Cdca8	11.910258319067484	12.786093176327137	11.10238164738909	6.201157049792885	6.276925294779472	6.930285118313554
Birc5	3.892487234021695	3.99314106925691	4.716440488945464	2.4059038215360826	2.4685071467523163	1.9820405651453183
Hells	0.9945922473470225	0.7250025539002543	1.0424009444511266	0.547376532992303	0.40468557444943887	0.5839612929346831
Hjurp	2.1164889150453714	1.8606181540222544	1.8758097566957435	0.9975565949009436	1.0739087475851712	1.2449188473663408
Mad2l1	3.0640968639936017	3.187415522584354	3.1933271699179318	1.687659413732597	1.596602329088439	2.076153474800388
Suv39h2	0.6156337202550725	0.503102400293528	0.596567983315707	0.3112376644890944	0.4028040978713371	0.3056098000186171
Cenpe	1.8181163326766647	1.899050492665623	2.500968097216545	0.9530893727448336	1.3848555400191132	1.3626596114462222
Top2a	7.341654214464844	6.354364802245523	7.917381336621089	4.334174238153389	3.902438013700112	4.751951767926244
Sgo1	0.8864263212157493	0.9364354236618109	1.0446236191883014	0.5807876712900373	0.3857551245539247	0.6793044904715256
Mis18bp1	0.6093838792916176	0.6195615827331743	0.7032803786301647	0.4830663241212722	0.3037651049228665	0.3932594680227212
Nsmce1	5.394850299136211	5.547175372891992	5.751015217299237	3.3849672980908423	3.6400073365962218	3.725930853508811
Dnmt3b	0.2010523357840436	0.20532278284150018	0.1575665616223342	0.0987392352885941	0.1477171134135433	0.11584554539643109
Bub1	3.1825564112359	2.836302300771473	3.579821702112984	2.074917706593962	2.3569931723379063	1.8946574783613863
Cenpw	1.212750796549655	2.2026350028499477	1.5926589623550034	0.7327461335749592	0.8191475239373239	1.207955633024086
Oip5	0.8084369471272984	0.5083608130918252	0.8213066941012414	0.3542158535004868	0.2221058741701536	0.5615695928538228
Cenpp	1.293891792797546	1.7128930876212587	0.8982345899526994	0.9157896617123417	0.7038449977024889	0.717577641959697
Smc1b	1e-08	0.023127857998378503	0.0059161831958541	1e-08	1e-08	1e-08
Smc5	6.0965774258200325	4.901988435116072	6.3043017750143155	3.8040245289584456	3.998057382413232	5.174520849767449
Kat7	17.106103164206147	17.082677290891905	15.753326979382537	13.052083653448637	12.877603798429456	12.203585497781912
C3h9orf78	34.000415453608426	34.59579757540774	34.15869226281614	22.88859173512673	26.561476968210073	29.288087591153012
Smc3	13.85349412211992	12.370925108765741	15.046497380855165	9.508473615346357	9.789929206505125	12.340938436208525
Stag2	8.359664523535637	7.521750452639007	9.680814826247142	6.474236993579639	6.2566757934926525	7.029906348411625
Suv39h1	3.7789040645744936	3.30375833505866	3.387842377210672	2.7165932190660382	3.0893860353583413	2.775227289055131
Smc4	8.20247599789169	7.506990990918214	9.344482943065275	6.1069757112576335	6.20344948178849	8.521880104247238
Mis18a	0.7325381967667273	1.6685511330640936	1.2914053354287884	1.002095068899583	0.8523691571556322	0.9558996034385773
Cenpl	1.892880939339724	1.512054507017538	2.0453879061323645	1.4528367804516649	1.5402654386251016	1.657075259067606
Ppp2r5a	12.997481892088985	11.67322447265926	12.787411834265553	10.365980916890543	10.744160719113362	11.257294374611044
Daxx	6.356610496388142	7.194519612447857	8.120891561620109	6.396021567663863	6.4213940293905925	5.973612972836183
Ppp2r1a	106.93804625204957	112.42588843419584	103.04062741364869	97.40272612049104	96.45423553572935	88.34465525697485
Rad21	26.181174535131372	25.41295026313539	26.949624259130438	23.14039611158748	22.83287747954576	23.513298928400694
LOC100362453	11.72527222824565	11.503559337543924	11.28228134984678	9.809306428192613	10.683595811099492	11.006829636822356
Smc6	7.3705801554617265	7.332720484834327	9.53723859708779	7.138701088155233	7.227721979917891	8.285177263196244
Ctcf	10.879018287526323	9.015266517556233	11.833735771622315	9.070644996881336	10.83173879514367	10.682709837132926
Ppp2ca	54.710468318585704	50.82520810818908	53.69773595937208	51.657596876362526	51.34798020376218	50.89706697366602
Ppp2r5c	23.505029356616213	22.73345140164549	25.151447533436304	23.447444059599675	22.074850252080942	23.84442007765075
Kctd18	4.485616582708215	4.524654568672269	4.766275562920449	4.494970457078119	4.560973045735024	4.390348456828705
Zfp330	21.82835872697673	20.705464914262944	24.53125193691857	21.247955268390104	22.382070662976734	23.714106030731728
Cenpb	37.00887084150572	37.09008183443473	37.66690263625295	37.737201440812505	37.41650398566315	39.189068578399315
LOC100360260	0.1932915987771028	0.35641161043682	0.1683159998379687	0.1954396674499808	0.191174233004906	0.3758866868632773
Cbx3	24.214591435254324	23.0628035765307	27.62344485971872	23.923863449129684	24.967549109093422	29.214445193262605
Ngdn	9.5099988458413	9.90343905089478	9.307446196476048	10.502884598711843	9.878029412839329	9.654396476017284
LOC102547086	1.1275342778664328	1.6549100610806633	1.7431275617639872	1.6357449690922305	1.5151942593595364	1.5941892776145836
Ppp2cb	43.43996606480869	46.94470584458503	48.58109693277989	49.63599735567725	48.80403946205264	49.12318033229883
LOC100360453	2.579622560910016	2.0489894242967144	2.9517226509801646	2.4984674198895194	2.6587905942798145	3.3130361869148395
Uvrag	1.901989969101675	1.7229753114558943	1.8622913042178943	1.9916496041774951	2.0811376889041093	2.148628404552722
Dapk3	17.92517015303082	17.29575510838198	16.670622680366723	19.006791041808086	21.601667366463673	19.0126119769378
Aurkc	0.8849164852337917	0.7188622435668155	0.80365485294804	0.7591823713289175	0.9282666930504356	1.446606373780791
Ss18l1	1.6388266666364146	1.4494693461195407	1.3922139364864399	1.7379864228345796	1.9096510343479327	1.8234474444786224
Cbx1	23.69407912590185	22.643402468892067	22.62119554981086	28.687936734251124	24.31293074881885	32.431380523110946
Dnmt3a	0.5589990495239244	0.6050806621702952	0.6440079500250034	0.8303361269117682	0.8449877492536593	0.9544495082232632
