# Supplementary material for: Peptide-based Self-adaptive Implant Coating Sequentially Regulates Bone Regeneration to Enhance Interfacial Osseointegration
Source: Research Square preprint supplement (doi:10.21203/rs.3.rs-5132912/v1), 2024-10-01
Supplement: Supplementary file 145 [file 2_autolysosome(GO_0044754).heatmap-data.xls]

id	S1	S2	S3	C1	C2	C3
Fth1	14914.332884871563	16299.8905266539	14676.117161457576	3809.538481670412	3841.849768844073	3548.319284142597
RGD1566189	1.9753509337264838	1.5483726218782732	2.2180389320689504	0.7621288608134542	1.028269705635609	0.7076242150719215
RGD1560687	4.0331033527530105	3.539335917888125	4.440952664955635	1.6837878280306038	2.0330643431098663	1.9415457226869564
LOC100362384	20.077730061775775	23.26120557331533	17.044363794397228	8.797880260361861	9.916531973630939	10.034376365217927
Ftl1l1	1.711678537122537	2.188722777447865	1.5281481944818132	0.8915730365927382	0.8721146198745168	0.8368285697442966
Ncoa4	75.00983444309978	71.66217061341067	76.41714869925549	36.44878284100008	34.01104551420767	37.41324883286862
LOC100359668	7.289582907712901	7.340289139083634	5.462307132907586	3.580748974142252	3.630431897740547	3.4927429022024
LOC100360087	17.95211423563811	19.411948569571518	14.621764061855565	9.388767867891238	9.05630613519156	10.091281883572258
Ftl1	3550.724809984261	3383.20598950582	2984.75692629994	1822.522812197148	1926.2764799390402	1863.586854963693
Irgm2	5.085299845281933	4.606850467121151	5.247293521101778	3.905089572004143	2.7416219209062644	3.5592451343131857
LOC102549852	0.5328432083166267	0.7935681953283301	0.3721614197858977	0.3704007672627976	0.329378945556976	0.1343221750925708
Irgm	7.7920671825769565	9.095921062814677	7.967249077590653	5.547636119908309	5.755140681710192	6.334386601584858
Pik3c3	3.667386609764701	3.602234618268305	3.451658688836476	2.4579688405026903	2.479459253104619	2.7233005471618323
Plekhm1	4.826329748598675	5.0132144115453166	4.903161520745672	3.6638592487987918	3.325460417065622	3.6344478231778297
Lrrk2	3.4501901583837253	3.22071323192193	3.860483794000209	2.501259968654805	2.5362738246609533	2.6974107901522317
LOC120102993	1.9233680146810503	1.187085679106676	1.0826142457717496	0.8146894712143821	1.1825101599809504	0.7600408228550268
Sqstm1	193.04521941651043	197.2642533867092	186.49629933767545	152.13993426738693	153.4818407400715	148.9585475476784
Igtp	5.56011325215919	5.040927327665561	5.146526222840942	3.9182962732731568	4.499350645119023	4.915598654600919
Cln3	3.754277495311892	3.4919201454674256	3.3663449075691205	3.1276291022449056	3.059369174676758	2.9054259396240223
LOC365803	0.07353485355650649	0.2920429601907053	1e-08	1e-08	1e-08	0.1853708550714632
Lamp2	46.25863408446276	44.29222187635821	46.7349254093961	41.02763608424921	41.12433354297101	44.434174134596184
Plekhm2	14.148972140246167	15.92121168213168	14.328031603952336	14.28322921123108	14.269364215821557	13.287232713630704
Map1lc3b	123.33988278604211	119.39593595556823	119.64113311951567	117.51453961732732	122.12205410542575	116.89613994534143
Map1lc3a	86.79570290854795	96.6823406694962	89.24489265248005	95.5430666059616	94.03789006132196	86.70672497416356
Lamp1	394.9072930740416	418.72419207655093	387.62858629500704	439.9816696390043	434.6832988816318	405.70629944966913
