# Supplementary material for: Peptide-based Self-adaptive Implant Coating Sequentially Regulates Bone Regeneration to Enhance Interfacial Osseointegration
Source: Research Square preprint supplement (doi:10.21203/rs.3.rs-5132912/v1), 2024-10-01

Viral protein interaction with cytokine and cytokine rece...(rno04061)  
Heatmap of the Analyzed GeneSet

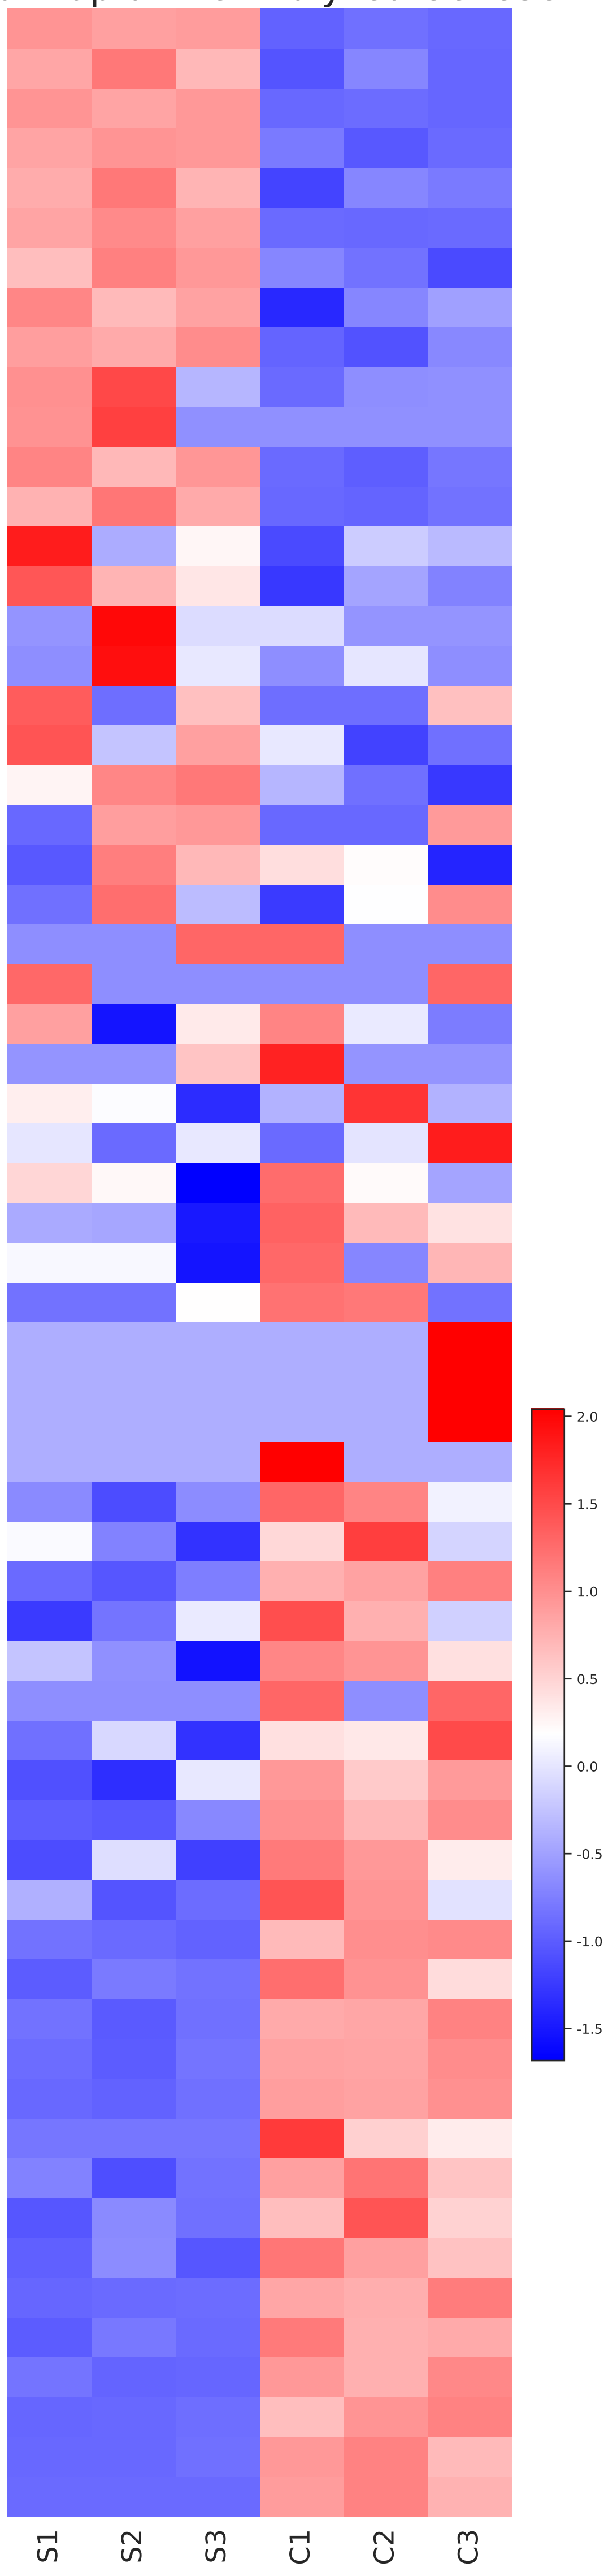

Supplement: Supplementary file 146 [file 310_Viral protein interaction with cytokine and cytokine rece...(rno04061).heatmap.pdf › Source data/1.RNA-Seq source data/1.BMSCs/result/1.6.GSEA/S-vs-C/kegg/310_Viral protein interaction with cytokine and cytokine rece...(rno04061).heatmap.pdf]
