# Supplementary material for: Peptide-based Self-adaptive Implant Coating Sequentially Regulates Bone Regeneration to Enhance Interfacial Osseointegration
Source: Research Square preprint supplement (doi:10.21203/rs.3.rs-5132912/v1), 2024-10-01
Supplement: Supplementary file 149 [file 389_external side of plasma membrane(GO_0009897).heatmap-data.xls]

id	S1	S2	S3	C1	C2	C3
RGD1565355	2.201596980378483	2.071781924758409	2.8923680417469955	0.107280180444911	0.0349796101764017	0.1604793853598507
Gfra2	1.5933918096384592	1.132985913149483	1.3854867575789693	0.0914597968025549	0.1101091716484325	0.1473379652598571
Itga4	10.066837182827957	10.039945255662804	10.907231371715987	0.6353907783879038	1.113055134919284	1.0560832772206656
Ace	1.7950171423783823	2.0489894242967144	1.3473677477420523	0.30634766234041527	0.20354378678697138	0.167164949766038
Itga10	0.4652925353859298	0.5273062220702166	0.5156723607640029	0.0427694070501397	0.0790234953925599	0.0142174166168347
Cd36	1.2937662940795247	0.9501074093837608	0.9488294785256545	0.11610746896034259	0.0075715723401555	0.1543858156592593
Gfra1	1.3455636796688961	1.3963415735667237	1.4099541366640713	0.2699650833281107	0.3791149074125984	0.2532318577497403
Car4	0.09249305541091829	0.061222555547791005	0.0939654795872774	1e-08	0.0152466521341803	1e-08
Itga3	204.01503496352584	209.6497028509589	192.87075294459962	58.84891241709825	58.484389207098474	54.03661995027727
Dlk1	0.9127457515400804	0.8182558283393396	0.9182733415355496	0.2598425934921619	0.1489971355268401	0.09829095809028779
Cd79a	0.0839653278198407	0.10420859816645289	0.12795298986352668	0.021224618189381702	0.020761395033777403	1e-08
LOC689800	5.501000528984719	5.382636741797715	5.444583597608505	1.9973523640553124	1.7785353600091662	1.7507107880247192
Enox1	0.14327836151187348	0.10328260673314349	0.0996981209679336	0.0317524742408788	0.0077648781426064	0.0296863887034206
Il1rl1	26.456654049639482	26.13948160143325	28.00294362932273	9.137356387232712	9.098075057176182	9.484564874200935
Tgfbr3	27.07098040517157	24.20872350321081	25.269441871084492	9.271156533077669	9.14249100505444	9.255998650833591
Il13ra2	0.8040142587332799	1.027790384153749	1.0924881861182951	0.2946941454376302	0.3280228438273908	0.4357631205024584
Rtn4rl1	1.0611972557043656	0.9966805923042372	1.26124132250146	0.4142820317619424	0.2917730930426149	0.4709875843819534
Lifr	2.084420901332563	1.8466883925162052	1.964891630690792	0.7781853398160739	0.6819097575390843	0.8427453917885781
Scara5	222.9985134429605	224.731323417639	220.60605011701878	90.6337885842746	90.7734826782628	91.07159657747117
Plet1	0.034617290153794	0.10311166565943759	0.08792091721616599	1e-08	1e-08	1e-08
Cd163	3.2213391915672394	2.743909074644255	2.7481622089060487	1.2249067002969727	1.2254045499006332	1.1660257349983574
Tnfrsf22	50.9363389274381	52.413640846125794	53.722575776491325	21.82834486701896	25.21614411767129	22.46484091577181
RT1-T24-1	4.523023187384204	4.433211993894907	4.064831164586944	1.7003250298148331	2.3323255306598543	1.7541378353619606
Gfra4	0.08081304626346439	0.0620013716717313	0.1044903118928955	0.0334272861927713	0.0181654167003575	0.0333357040128514
Itga6	7.760721427105	7.341424459917703	7.6913997301790715	3.7265647252838128	3.6225718311162574	3.907783473743722
Rad51	2.346924697901211	2.609501910660228	2.2454749112030994	1.1214892867114479	1.2957472258351872	1.256192661393989
Cr1l	25.566783044178592	24.26797907468978	24.334759280942603	12.599199650640697	12.427473849344972	13.885264455046764
Trpv1	0.1247535380568761	0.09909150627124029	0.1098409242207444	0.0588653090036384	0.049354788331087404	0.067090322174793
Ackr4	59.20734101503216	62.2743049856878	59.65871408740451	31.989374320229864	31.60610692337336	31.83038969655993
Clec2dl1	59.39665462241857	57.308516504239385	64.17362729260537	30.01516385906453	33.03332844192979	34.20454819106282
Ccr1	3.3935793505498646	3.801691621473868	3.642750069500296	2.149413441176506	2.0138431298367	1.7432278380706339
Gsr	31.639221044314738	32.404927902106515	31.349725024476232	17.13424760016886	18.089473346522333	16.880811046501314
Heg1	7.715316880453137	7.768074789657919	8.10588551217059	4.496189139501153	4.106730652207365	4.434368382603448
Ghr	5.552988336327134	5.759325265481576	5.525641414884653	2.9350702631478818	3.4197389091703965	2.9869680805925247
Il6r	2.1167282935407847	1.9144509456963987	2.0111263254228153	0.8145087525032678	1.1781466195606363	1.2789045330149331
Enox2	0.7825321818719144	0.5474543282113644	0.648222244777395	0.3481405631197924	0.3810265272764042	0.37874917777017447
Flt3	0.0645534986183072	0.006409349555712	0.0524649177739215	1e-08	1e-08	1e-08
Il31ra	0.029597784531493802	0.0073467154657349	0.022551722700946502	0.0037408471933785	0.0036592041122032	0.0037305982570631
Vsir	8.208867006454375	9.096423388091903	9.13941568939615	5.536410786128872	5.3978816703217865	4.740870754815774
Cd44	82.36805033461542	83.31583341033452	85.55039819068719	51.66081511524506	52.070994308034656	49.95606310805232
Ebi3	0.5994486081062049	0.6827020517898134	0.5552568727286923	0.4456693703429383	0.20925251023619648	0.3200028150734776
Alcam	55.29421616755261	51.41226581985632	56.88822340991136	31.44822038238649	32.5725695679864	36.96826700427236
Clec2g	66.16507297033664	63.43947086963094	71.98097319213286	40.4110842144436	41.359067651363404	43.87143177014799
LOC120093159	0.0072211809744419	0.007169713412733	1e-08	1e-08	1e-08	1e-08
Cxcr6	0.0127302356049435	1e-08	0.0129328918356682	1e-08	1e-08	1e-08
Raet1ll1	0.026922374553945503	0.0534609707512263	0.05470190929356	0.027221565471998402	1e-08	1e-08
Ermap	1e-08	0.029328175531875902	0.024007155922498	1e-08	1e-08	1e-08
Adgre5	6.402858048611687	6.451029781753987	6.047015422997832	3.7991657882231133	3.9031403963501647	4.206473006055052
Fcgrt	112.02191398779335	113.30457554459659	112.26657298065173	70.68921820218108	71.78122600728614	70.67280937190446
Cxcr2	0.1436131692127071	0.1960606865685137	1e-08	1e-08	1e-08	1e-08
Nt5e	25.29530965206086	24.973599226573263	27.119511844004556	16.232003548600492	15.140206986351915	17.970188200286586
Slc4a3	1.009563554290664	1.166349949348428	1.4132022703573168	0.8420283209803426	0.7546301583777508	0.7036771348218233
Itgb3	7.497756414583288	7.451197686924488	7.201764393749754	4.617311963992778	4.811245929609863	4.835244163608864
RT1-N3	2.2919505077658804	2.165757776133875	2.098269436796276	1.235957968328539	1.354895204193649	1.652283691989005
Abca1	9.050913671080009	8.080815632875492	8.428939158332438	5.480854381503812	5.660446737344206	5.652509936644039
Flt3lg	8.19714307583889	8.117131338165537	6.450052151954236	4.440913071156817	6.193412854456461	4.297199192424311
Adam30	1e-08	0.0068321685266933	0.0139815038763981	1e-08	1e-08	1e-08
Cd34	0.3400039000525069	0.519354741009244	0.6022646987243467	0.2291882680921166	0.3362794100021865	0.33404973905661617
Il6st	181.5882721319365	169.37954875005474	177.35288781481427	119.63915924320472	116.70015837063764	122.05612383116744
Chrna7	0.0582765823452359	0.0267051870053219	0.0045541864888949	1e-08	1e-08	0.0045202229581984
RT1-N2	3.4569193883063	4.090412351517619	3.528999417773924	2.180343389046428	2.72196325604434	2.7158471096848453
Cd14	23.13005080141023	26.575908477354186	26.078999226001468	17.019858716587756	17.983978300580095	17.215895948636987
Cd200r1l	0.2833594071601507	0.3692585046128552	0.4857811063255509	0.1343008217293716	0.1401277127261091	0.3125100210628856
Rtn4rl2	0.419320402759672	0.8680960288600129	0.2628484072177648	0.1443337434596693	0.2470714436498974	0.1529344494756879
Tfr2	0.023123271352729503	0.045916919160843304	0.0861350237883376	0.0155868316390772	0.022869973201270502	1e-08
Anxa5	344.4132111548072	375.8216780042659	355.21606566080527	254.47420523207322	252.0995836637449	243.2923698921727
Ano1	0.024634029585096803	0.024458455162663102	0.0050052451673622	1e-08	1e-08	0.0099358255826901
Adam9	35.30304691724789	35.93200140299618	34.2383904407718	23.90524740201537	23.972228747885172	26.534629567729752
Neu3	1.1032862290951118	1.4418385020406903	1.034630556853463	0.7913710642105455	1.0072620451871395	0.7321520980449
P4hb	1011.7617225645122	1054.302523454946	1006.5267764279677	738.3551440482996	737.1606760061175	702.7053023221669
Crlf1	3.639739790933117	3.985457990200907	4.0375126056801784	2.488355083536965	3.379308235518105	1.823006609347936
Flot1	59.13370810472693	64.92048679995574	56.445161209413136	42.08843500475275	45.69596511357257	40.61512871649697
Ccrl2	0.1443793979585066	0.13311104979728788	0.2095397331214549	0.1251290589771218	0.0305995426456023	0.10398853284496709
RT1-M3-1	8.259844065300616	6.80768987592332	7.7597291114009765	5.388152606614248	4.725932930907102	6.197310314906786
LOC497796	0.1463877665699851	1e-08	0.0743590833055425	1e-08	1e-08	0.0184511420287515
Clec4d	0.7036618116402703	0.576383440298372	0.6791204320988373	0.5691853422466009	0.13919075186092708	0.4434577522957737
Ece1	69.00751639768994	68.82228017264738	65.4812428231706	51.89140792326541	50.45839333442332	47.47530608524564
Calr	1394.8947098121093	1420.0342604634145	1409.3744243858969	1061.7767638972955	1059.3604361088053	1024.5327532522883
Ngfr	0.050749409074208704	0.0719824273005259	0.0147306653670196	0.007330493171348	0.0143410034587268	0.0292416080957801
Cxcl10	0.8352105787899504	0.2487773379402304	0.4242532765668964	0.06333693602545669	0.3097730565357274	0.2737080725993457
St14	1.8830768115066616	1.8258354783404607	1.942945538340847	1.242064872467531	1.585991816569126	1.5650159722050763
Btn1a1	0.026309142916883403	0.026121629433724203	0.0427647392699431	0.0319218207168301	0.0156125715454006	0.0053057355211565
Capn2	87.85812492159069	84.95660770712946	92.71473650365343	68.73003012939208	67.78998222826614	72.44286294340004
Rnpep	22.515305710901746	23.9905514462662	22.873733528959193	19.64084125596237	18.519948528043486	16.65549035676837
Cd27	1e-08	1e-08	0.0465283663140097	1e-08	1e-08	1e-08
Cd3g	0.027185107158662503	1e-08	1e-08	1e-08	1e-08	1e-08
Raet1c	1e-08	1e-08	0.017584191443233203	1e-08	1e-08	1e-08
Krt18	1e-08	1e-08	0.017571346898716502	1e-08	1e-08	1e-08
Cfhr4	0.0174425290609172	1e-08	1e-08	1e-08	1e-08	1e-08
RT1-Bb	1e-08	0.0154973451946946	1e-08	1e-08	1e-08	1e-08
Cd3d	1e-08	1e-08	0.0149411033008341	1e-08	1e-08	1e-08
Fgb	0.0134535438779517	1e-08	1e-08	1e-08	1e-08	1e-08
Btnl8	1e-08	1e-08	0.0075955768501239996	1e-08	1e-08	1e-08
Cd226	1e-08	0.0028740268081114	1e-08	1e-08	1e-08	1e-08
Astn1	0.0252486980200416	0.022561869395731002	0.0128253246802852	0.0178705054428831	0.0149832744389641	0.0050918771028373
Cd302	27.90158498535376	24.363640926921125	30.01432460444452	21.232880713886647	21.678383361437827	22.495662841030803
Slc2a4	0.3320669778640527	0.5678170588515038	0.2717567868663606	0.326430680555821	0.2736911940837669	0.1395155817483704
Clec4a1	1.1641791415720921	1.6456620343246244	1.443309622860581	0.6982896194306606	1.014816510451043	1.4524423714166048
Spa17	3.3826028135992985	3.046075897454217	3.303255676199928	2.306642478741052	2.048824531738625	3.2786210961631816
Colec10	0.003358146381392	0.020005221309333503	1e-08	1e-08	0.0033213604918593998	1e-08
Cr2	0.0126910026974112	1e-08	0.0257860587357288	1e-08	0.0094139892247491	1e-08
Tgfbr2	92.55140065461607	92.8002461484726	90.44398764555237	74.82618447616605	75.15084337936351	73.29370242321636
LOC103692282	0.0046813503766696	0.0092959599764143	0.0190234660809355	1e-08	0.0046300697702848	0.0094408027422714
Cd248	47.042575920329114	50.5201285428729	44.59348415003941	39.98626817108204	39.63399396823642	35.67867706718078
Ccr7	1e-08	0.09674674864342289	0.019798495773121802	0.019704831430142	1e-08	1e-08
Tlr8	1.455703784622889	1.6968888677666358	1.6145973395619344	1.1691208013313783	1.3121841710142188	1.3935271410430619
Clptm1	76.13131602464073	77.49591247106174	70.5866462484187	63.04004549104552	63.735911675569604	56.64775842789237
LOC502907	1e-08	0.0183238272177332	0.0749966123829868	1e-08	1e-08	0.018609335678257503
Tfrc	24.3431169902717	22.145709181125756	26.47711890101344	19.898793620061753	19.170310431486328	20.871996915137174
Clec4e	0.2906152128808281	0.6320485456845014	0.2390051085644836	0.3078374599285203	0.0958105864036861	0.2790855137428926
Cd48	30.229742184680532	25.15794125362345	30.55901908204284	23.895985922472388	22.146561570453052	24.856134226612102
Plppr4	0.0383694692414036	0.0126986726703376	0.004331151558218	1e-08	0.0168662990299611	1e-08
RT1-CE4	0.5669508300295188	0.7116031958385224	0.6846510574378182	0.5083550259332571	0.46552025485947307	0.6633655116851478
Musk	0.282926105094792	0.3477928377377788	0.2600557961010057	0.3269374739561556	0.15323852303451568	0.2173611693304531
RT1-S3	3.8060296225847017	3.5113699054294973	4.294342267325817	3.0480107416745765	3.57278925411996	3.1245666753752634
Ly6g6c	0.1195869778040156	0.2176801719477016	1e-08	0.0806106431233085	1e-08	0.060292345467688004
Lgals3	222.4311361934632	243.9668397403114	221.70490706375801	194.5495572809423	202.99045238115713	181.08210520988985
RT1-CE15	0.5767360766488656	0.588531760435058	0.34178510100216747	0.3563666384355198	0.3802789109705168	0.4846231124060446
LOC124459649	0.9599278326430445	0.9133742030373156	0.589188900385091	0.647063740746558	0.5933828390059374	0.7864483452727822
Hyal2	16.50193382617019	19.54456883630436	17.623745861480483	15.343370339666892	15.403464748989046	14.460470682616394
Epha5	0.0029021082504222	1e-08	0.0058966052235183	1e-08	1e-08	0.0029263201906121
Cd244	1e-08	0.07289755260574189	1e-08	1e-08	0.0072616665327444	0.0074033479364975
Skint10	1e-08	1e-08	0.0942723557126441	1e-08	1e-08	0.0155948923286769
Scnn1a	0.5051353620041621	0.661747702321013	0.4419022124560793	0.5107489814692832	0.5065408956952215	0.3183435412693928
Ackr2	0.013561418720043	1e-08	1e-08	1e-08	0.0026825807122681	1e-08
Cd80	3.713666066717528	3.208433570233419	3.970198185194001	2.743432222821805	3.196066940342658	3.403566487933402
Il12rb1	0.038459489629445204	0.1018276547876633	0.039071737473215504	0.0064811572760212	0.0063397074331621	0.0775606970986609
Il2ra	0.0169453007623056	1e-08	0.0114767085755453	1e-08	1e-08	0.0113911191818723
Il27ra	0.1357696179426324	0.1797359235347995	0.0459769981772611	0.1006708580175264	0.1163780490425508	0.0182536528480156
Agap2	0.0039949854724472	0.0555310383220727	1e-08	0.0161574981306716	0.0039512234837355996	1e-08
Stab2	0.0144238767307475	0.0085926479716198	0.0029307069072055	1e-08	0.0028531827970395	0.0116353729849924
Anpep	156.2009287669674	160.13258347116914	148.4484565309293	140.54139286301736	138.95219192113598	131.0303903672468
Folr1	0.38478825695615937	0.7095135268301175	0.3350689857076219	0.1945322285297255	0.3941650867411078	0.5127123136985289
Ackr3	26.568518744373844	28.07890135058917	28.25634313501702	25.447527989895622	24.48533420831498	23.730044224693827
Il5ra	1e-08	1e-08	0.017397666857046502	1e-08	1e-08	0.0057559803098371
Ccr10	1e-08	0.0134956802011204	0.0138089423848122	1e-08	1e-08	0.0137059599685444
Ada	5.456055091420794	5.640691991745476	5.2065699221648485	4.311586860175891	4.990256678454406	5.234507738926258
Map3k5	3.758021924304544	3.7730758602554544	3.8022798238510167	3.2962458747495345	3.2205170736443685	3.5885108563347266
Itgb6	0.0380755390455398	0.0850593536836848	0.0531872989161353	0.052935676012834	0.047073059885630104	0.047991497126039104
Itgae	0.8631714046766635	0.8570193100678986	0.864295039993442	0.7220708661045383	0.8045812698141176	0.7889709962302026
RT1-T24-3	0.1363055506055638	0.22233451751566238	0.41542629659638447	0.2559520284943211	0.1540713410401381	0.2061640978903345
Cdh13	11.06524313564574	12.279710725161562	10.899883313275216	9.665765677363181	10.147472354282154	10.938645305836062
RT1-T24-4	0.9730155335888656	1.2042306306831567	1.0804592321656366	0.9472211708921805	0.9981654987111088	0.9856967237928449
Kcnma1	0.0490274684595532	0.0020282610128851	0.016602657029138403	0.0061965481859086995	0.0040408765892677	0.028837962534972103
Atp1b2	0.023853152671452403	0.0789437893497373	0.14539721747420228	0.0803940934037026	0.07863950737441569	0.016034774838955303
Efna5	5.164913211017637	4.949806336065397	5.2905715414318895	4.435506211986428	4.757348801596897	4.828612618636512
Cd59b	25.34503389737807	24.084576530320444	27.29774297914713	21.000981573705946	23.68775564478413	25.34192515273824
Osmr	20.63978090106157	19.62074517449827	21.83189472258105	17.906160493910157	18.42108859262367	20.589414041524993
Lag3	0.1501100021112147	0.058320053388414	0.1657604855674133	0.0395943176697177	0.10973548943983369	0.1513623560418144
Ctsl	907.3431676286376	911.3895803734044	922.6108790247878	848.5319481722673	829.5523642786392	852.5543503857023
Itgal	0.11632891392011879	0.1522497347030374	0.1181807881856959	0.1657396480451768	0.0732165782120174	0.1066358512023424
Thy1	910.9269903333928	964.4505399721412	890.8883997097607	865.5006389509401	868.4751800134698	837.2370168515262
LOC100910848	12.793876742968317	11.90150996739453	11.589530893705328	11.491104479150309	11.008805438930413	11.260864126637799
Vtcn1	1e-08	1e-08	0.0826637908053024	1e-08	1e-08	0.0455818443741971
Il3ra	3.5795896827500817	3.7338550231735175	4.259178377363089	3.57712056385656	3.4301716201218517	3.8763006554567245
Il12rb2	1e-08	0.0129814884596089	0.0066414125992112	0.013219975785545299	1e-08	1e-08
Tlr4	2.4450720754571407	2.7372580057338647	2.4983958778171287	2.4077510727480425	2.2780975117607967	2.601250654613716
Ly6g5b	0.0112165991166248	0.06681987970256299	0.0455806072796646	0.07938869131850229	0.0110937297148749	0.0113101780934175
Itga1	11.018024138426838	10.186151117611569	11.684746043673707	9.916886059897617	10.046972485975425	11.586768243702165
Fgg	0.0106562744577835	1e-08	0.1623885803038458	0.1077468958578877	0.010539542996445	0.0107451786972117
P2ry12	0.041323255419188604	0.0082057543247301	1e-08	0.0083565049520497	1e-08	0.0333344111800411
Cd200r1	1.8355858853691063	1.9390101322130848	2.10322994732486	1.8051360319517247	1.7574494158185523	2.19741553557634
Il4r	13.169276047548603	15.554047364505905	12.847351285285441	13.46860744703319	13.872983012602425	13.60969450775899
Clec14a	1e-08	0.059839545451102205	0.0306142768970321	0.0076173685865805	1e-08	0.07596489973975329
Clec2e	1e-08	1e-08	0.1478567867311864	0.10187812930903249	1e-08	0.0451551208183535
Kdr	1e-08	1e-08	0.0040806139379716	0.004061309073388	1e-08	1e-08
Il13ra1	5.643480229779416	5.418394496659168	5.902906732879728	5.2128282378229365	5.759460417407159	5.994836844777478
Slamf1	0.0086701746375668	1e-08	1e-08	1e-08	1e-08	0.0087425090279035
Klrk1	0.0075649363978259	0.030044045131439902	0.0384267835053402	0.076489971781542	1e-08	1e-08
Mog	1e-08	0.0399707509867131	0.0068164339768611	0.0135683625291145	0.0199083486098903	0.0135311887164661
LOC120093125	1e-08	0.0073929211604879	1e-08	1e-08	1e-08	0.00750811215258
Btla	1e-08	0.0053822118063992	1e-08	0.0054810901368183	1e-08	1e-08
Rtn4r	0.061120866027865504	0.1456445582107492	0.0620938670323774	0.17304028492344709	0.024180538981002503	0.07395694808530029
Ceacam4	1.259107700556903	0.9028743006191229	0.4619159373064392	1.1670085997216355	1.0723546804004884	0.4584711222417401
RT1-CE5	4.776473273237653	5.589292312831951	4.539995997069818	5.660871486475793	4.843084089248238	4.6245723905521805
Kit	0.0044853707928007	0.044533932126068904	1e-08	1e-08	0.0310535989802437	0.0226139187376439
Pdgfra	48.33074943760304	43.82106190788543	46.064481232932074	46.536779432363616	46.10728437471621	47.79533270235269
Tmem123	23.527828684858644	21.775697226716094	24.42863483599832	22.716412064752046	23.592376445489894	24.726665437196576
Izumo1r	0.10570634761247809	1e-08	1e-08	1e-08	1e-08	0.12790589309930958
Fas	16.119367698440687	14.881035381879546	16.71517988475305	16.551702687792393	15.23646577199207	17.086181902749143
Umodl1	0.0049298912461368	0.0097894988571108	0.0300501789123585	0.0049846775073126	0.0146276441774522	0.029826074766026802
RT1-CE3	0.4733277386395821	0.8694152295332492	0.5770353374804924	0.5862701468533282	0.6905106030874356	0.7039830813978328
Itga5	40.1032296914075	40.26807670345432	38.13170753554257	39.92434370989326	42.39921235705992	39.291204331347345
Raet1e	1e-08	1e-08	0.0644334748598473	1e-08	0.08363873256464639	1e-08
RT1-A2	14.895497222288903	17.679430950179764	14.265862299048704	16.928437995059163	16.102315499597207	15.242434031567582
Ulbp1	1e-08	0.0114512800878479	0.0156227800693898	0.0194360856921762	0.0038023873856309	0.0077531403280417
Fcmr	1e-08	0.0139439349646214	0.042802786182105	0.056800384940979	0.0138901893108546	1e-08
Itgb1	484.4156195040514	476.8859322410463	509.7265168302234	504.3779692357724	493.541534900076	531.5995562809401
Bmpr1a	18.05830474102618	15.933012538612989	17.8993121379954	18.077206514785377	17.313874153500425	18.571531382844643
Cxcr5	0.1904840114540834	0.0367745803759692	0.1558881990985358	0.2033009274144493	0.13606479218338	0.0853658731336919
Crlf2	10.913196147048916	10.924668183193084	10.630298601304208	12.325163828912796	11.131507444420064	10.333474544370954
Clec2d2	0.487739326386381	0.3480640732623694	0.2787208879260859	0.2851079106733305	0.6180705185562542	0.3073803105497839
Mfge8	442.3497151452661	473.3078618194405	432.90424209861453	485.95112082339455	479.64938908156176	444.87445395666566
Vcam1	4.1761918240943094	3.723960664045739	4.370754578063656	4.294306826066092	4.317483751839584	4.258705486548951
Tnfrsf18	0.0203859072235859	0.0506015112706667	1e-08	0.0103062338646675	0.0201625948627645	0.0616679346970412
Il11ra1	14.65998075267494	15.62699950606867	13.742704356280809	15.546757327752248	16.25369111344735	14.9762243488241
Lamp1	394.9072930740416	418.72419207655093	387.62858629500704	439.9816696390043	434.6832988816318	405.70629944966913
RT1-CE11	0.6444467249965302	0.2683256881163943	0.3167931647103998	0.2522355643911078	0.637387289948315	0.5450130793374154
Mr1	3.5802119120913543	3.4092752886695705	3.1908219490846763	3.669362788274811	4.039951502675842	3.1998447830686394
Eng	36.1978322971317	40.9136195898158	34.34190636863445	41.78960730489466	41.46951511206664	36.23527608913129
Icos	0.5590861506052812	0.3721009199407001	0.4618790592634623	0.47833020431679907	0.6501858242285434	0.38409378799758087
Amot	13.526916800013312	12.0704549404802	13.80748802042804	13.411365088410001	13.841430961697865	15.005597569608744
B4galt1	22.87960009993556	23.720342479633732	22.46701904047538	25.186961533613058	24.94816751715531	23.98713369014801
Abcg1	1.6908221538223756	1.405637734699412	1.8404344837525124	1.6282023134937476	1.871383839329691	1.8064123686482263
RT1-A1	2.3539010523764237	2.0481248474812075	2.057095485304588	2.482428368791445	2.403216324845212	2.0927982112899692
Lepr	0.1087063605330325	0.0907606451359574	0.13051632168049218	0.1149105348049501	0.1197332397148318	0.12456055280678449
Cd276	19.6811050792769	22.05997891456352	19.383716318557322	23.62561313449871	22.50000215802054	20.514422425629025
RT1-M6-1	0.1212195643951967	0.2407111788431923	0.0615746521868848	0.1225666893734947	0.23978337844472009	0.1629745140628291
Ncam1	27.469626314837345	26.47938580737589	26.16210761863015	29.062827626783534	29.796834230083018	29.018391960509057
Itga2b	0.1153160146681579	0.1081333372012933	0.1301686258784795	0.0582987714552499	0.1964242826896999	0.1679572302314166
LOC120098765	0.1824911053772261	0.08682042141266709	0.1931210778736594	0.0768829837881266	0.1992933052568003	0.3143565798951133
Adam4	0.0290292943790704	0.1345044664221188	0.029491420152443402	0.0195679364712894	0.2105494709718928	0.07805727144733779
Tnfrsf4	0.0698472655315489	0.06934944212493149	0.283836708694313	0.1177058017287249	0.2302737791062044	0.2112899643823404
Slamf7	1.0284829512603044	1.0288017124409676	0.8765830404234322	1.0905450320488594	1.108651891335186	1.040947623228371
Atp6ap2	36.89349947729116	33.214643797650844	35.83602073957255	41.39604044599198	36.36926196896539	40.40514051726909
Scube1	0.0117161008585824	1e-08	0.0089269620835018	0.0148078761786384	0.0057938848931472	0.0088603878495315
Cxcr3	0.1850973371963536	0.1696413148010952	0.0144649289502964	0.1151719067534462	0.32389259768269557	0.11485636523850609
Asgr1	0.4119384168405549	0.3926423062897999	0.6193743509399388	0.4664982876989799	0.4074259375939629	0.8972103799659298
Adam4l1	0.07687734644543859	0.076329417436207	0.0878638257179737	0.0485823112127083	0.12355721378868209	0.1259679251735625
Il2rb	0.0900655087645306	0.08048122620888769	0.0091499378107048	0.1183863373066163	0.0801710183160551	0.0544901541883707
RT1-S2	0.08918351141316419	1e-08	1e-08	0.3156111329065132	1e-08	1e-08
Cd207	1e-08	0.0153958564245918	0.015753225595509502	1e-08	1e-08	0.0938144101776206
RT1-Da	0.097601904580359	1e-08	0.0396622692157345	0.07894925332274569	0.15445239132300728	0.0196832456514463
Hfe	3.6013579649697927	3.8853953796629286	3.125730409109244	4.3008427712495765	3.800303164613993	4.017419124672128
Antxr2	15.672652396670117	15.039886388745701	15.114527562382612	16.926932623878514	17.543400314392507	18.057906352595957
Antxr1	86.97671237534693	85.10607335349167	82.33849250201634	96.40588327721692	99.82043971934478	95.9623467217746
Ceacam1	0.1490367975700714	0.0739872877037034	0.0757046841600095	0.0690676571056514	0.153546051949259	0.18158857032282438
Cfh	16.78646488781478	15.200938641408634	17.642337513084048	18.1447327721606	17.89750585686871	21.04999786293673
Insr	3.2309069174123803	3.595123211765803	3.307904081982984	3.816369516528584	3.748010268348575	4.115461282999111
LOC120095126	0.0508844361286427	0.2020870371376944	0.1550834211239879	0.034299949881980804	0.5032702603889898	0.2052358109616429
Ly75	0.3283890715456124	0.24114006804897078	0.2919146962185516	0.3216622893266261	0.3247918133137381	0.3483750821418161
Cd274	0.7524551457772326	0.6752563771093096	0.5831257108569607	0.8095875908199959	0.6917360328406282	0.8657335896387033
Enpp3	10.434469675340212	8.910364172408842	9.53358135711972	11.292930523238525	10.776214506176293	11.9421874749472
RT1-CE12	8.348186510702902	8.378132609605391	7.901441348636452	10.141298151491394	10.216971167167713	8.660074513143282
Clec4a	0.127439297541416	0.0632655037845849	0.0388404193880673	0.1417410963368402	0.13864762329338579	0.0642512609289678
Klra17	1e-08	1e-08	0.0141584327276886	1e-08	0.09648729441830889	1e-08
RT1-CE13	0.5809377165403196	0.4972389586115012	0.9361568372925374	0.9924928558912942	0.7925158244873433	0.7473801278278893
Fcgr2a	4.526229638868598	4.653486448193169	4.474462427033856	5.450384046173802	5.3807447821982155	5.41310626526512
LOC103690152	1e-08	0.0079076647226208	0.0404560480328675	0.17716444889259939	0.0157543607017161	0.0080308760764226
RT1-A3	0.17024484852746619	0.2112893223758398	0.547690895647115	0.4159972437274157	0.4069181808957033	0.5006901056154321
L1cam	0.031126308098848	0.0309044611610258	0.0722784256675095	0.0494563364626946	0.057172770588791104	0.0851905324523727
RT1-CE2	0.16639649366265	1.073868412581072	1.2002223397388296	0.2018948072252085	2.6167223772368637	2.265093653079833
Epor	0.013392668159047	0.0265944189257373	0.0408175895492245	0.0135415021027277	0.1457054769112618	0.0405131856423152
Il1r1	17.6219508247689	16.151440409530235	18.141945900350024	21.08771595606635	19.781989990408118	22.446514796114048
Cd86	1e-08	0.1753502523361347	1e-08	0.1913267923997548	0.0873371949902541	0.12720174066171788
Icoslg	0.8756588375243163	1.1257200779433088	0.8741721426289685	1.233404731476498	1.2515413908305362	1.0462872680733037
Cd9	99.26240542566505	96.72755829563076	100.61149543924779	124.6205187036515	121.94160516329093	121.79767901509979
RT1-CE1	0.5619426548266366	0.5579375124678955	0.3762673488435532	0.7231478255916226	0.555786990580606	0.5923868400320418
Ctsb	678.771567124638	697.7819935604822	656.1747537518397	861.4083371444116	854.8901945227469	810.7683811147815
Csf2ra	3.4759570894473124	4.969703296275185	4.265800588233466	5.834212332732471	5.349342148427062	4.640562642861232
LOC498276	8.92883701007357	7.649808275993839	7.473802955459845	10.108034092787463	10.718304426241863	9.196949468872475
LOC689770	2.539769070397342	3.054193354849165	2.1314699024101413	3.4612090001159985	3.338862272540714	2.863183002762694
RT1-CE10	0.8714605168518841	0.6753165626851498	0.7773660492426832	0.7521970758139971	1.072137315406778	1.093055671674531
Ccr3	1e-08	1e-08	0.0066542728532069	0.0132455746127926	0.012956492610291	1e-08
Klrb1c	0.015340612283897	0.0076156424879662	0.0155848238738859	0.0077555519623008	0.0303451247626835	0.0309371850504754
Ly9	1e-08	1e-08	1e-08	1e-08	0.0059559719323756	1e-08
Il23r	1e-08	1e-08	1e-08	0.0117474869566352	1e-08	1e-08
LOC120093164	1e-08	1e-08	1e-08	1e-08	1e-08	0.0147290444510823
Fgf8	1e-08	1e-08	1e-08	0.0181236724054675	1e-08	1e-08
Raet1d	1e-08	1e-08	1e-08	1e-08	0.027796855481425502	1e-08
LOC120098769	1e-08	1e-08	1e-08	1e-08	0.0292005615188291	1e-08
Sell	1e-08	1e-08	1e-08	0.029557242145213103	1e-08	1e-08
P2rx1	1e-08	1e-08	1e-08	1e-08	0.0353492059518505	1e-08
Adam6	1e-08	1e-08	1e-08	1e-08	0.0376357549869039	1e-08
Gypa	1e-08	1e-08	1e-08	1e-08	1e-08	0.039334054226037
Tnfrsf13b	1e-08	1e-08	1e-08	0.0479626638316313	1e-08	1e-08
Klrd1	1e-08	1e-08	1e-08	0.07753031452598	1e-08	1e-08
Ccl19	1e-08	1e-08	1e-08	0.1339376773433434	1e-08	1e-08
Il12b	1e-08	1e-08	1e-08	1e-08	1e-08	0.1493986167748421
RT1-Db1	1e-08	1e-08	1e-08	0.2635055229927021	1e-08	1e-08
Ide	12.65455871275095	11.20747416436094	12.63356151287722	14.467115278270064	15.308873336564744	16.399361450232913
Chrnb2	0.17236193629805338	0.1818292990518563	0.1641617039104392	0.4139088386759147	0.1385099964127902	0.2715623944995958
Thbd	15.426817066655989	14.061912032014408	13.545432411013852	17.852794779910788	17.61061042550053	19.424794184636646
Il21r	1e-08	0.018997551406344803	1e-08	0.0483663898739851	1e-08	0.0385871046993203
RT1-CE16	0.43614071610876287	0.2514380580251527	0.4430837691471383	0.6116924613474592	0.4731079356182018	0.4397793981172539
Cd24	1.050088711604109	0.254293763275844	0.6244714487714793	1.1394480939971838	0.7726064899373503	1.187977492833321
Clcn3	2.493469456338932	2.6304288201092896	2.681591296749058	3.1908679672973004	3.220773195939297	3.650278057772244
Itgav	36.58197989373636	34.39931705283148	37.02768115467738	46.21076867621637	44.5207865701144	48.55543864559178
LOC100361907	0.0151009153732111	0.0074966482303416996	1e-08	0.022903094857419603	0.0074677530861291	0.07613446422577949
Dag1	75.08350477804046	74.48191488183521	72.52241996728534	97.29639340578635	98.48241658387603	92.98937702944319
Lrp1	139.21332600081348	137.68203838242624	125.47390911864623	174.31042253909948	176.14612180777686	177.17690439029334
P2rx7	0.0144093936149064	0.0143066933959237	0.040256629862737404	0.0692052135166332	0.0249402041619818	0.050853609244311905
Nrcam	0.1580279888479833	0.13755763290935388	0.14294985585228528	0.1751059382327492	0.22266956577642188	0.1811746746692238
Gpc4	43.92382321663671	45.23005976875469	45.62065906778217	60.323933875441554	59.65766396061861	57.96309014267814
Cd1d1	4.296919429722053	4.714703201525588	4.876577448548013	5.871177730397926	6.023811222067393	6.5056580059685185
Lrp2	0.025942890486485903	0.0090910608470037	0.029456573809778102	0.0354892620537072	0.0301867105904885	0.06924526767170659
Icam1	21.883412058759053	23.195413799797212	19.98244748224394	28.67905455895089	30.50487911524929	28.274127251354276
B2m	252.42095476782066	270.51943267371985	267.8684790070062	348.255784914839	350.7704676449791	368.932130165915
Adgra3	13.795227988573412	12.356933754097073	12.979863572097267	17.70248120260011	17.57062399805404	17.881671751462733
Cd55	53.96284779906623	53.25731606272298	61.24114619910402	73.21504032149126	75.29350786574904	81.3453310108248
Itga2	0.181293460780821	0.12214375960806219	0.2368022434471832	0.2094950762302228	0.3073843226247874	0.2807377426616877
Csf3r	0.0119707984859429	0.005942744451555	0.0060806875061534	0.0121038310503653	0.017759496085516403	0.048282648716288
Tnf	0.070178491402475	0.0278713288978681	1e-08	0.0851500682250953	0.1388194665388322	0.056611189241741404
RT1-M1-2	1e-08	1e-08	1e-08	0.0489348245889067	0.0119667153235058	1e-08
Hhla2	1e-08	0.0642335004107972	1e-08	0.0327067832754407	0.1173075079504148	0.1739582238084114
RT1-Ba	1e-08	1e-08	1e-08	0.021395325493854003	1e-08	0.0853468012250383
Sema7a	4.8855518090963175	5.209380178533326	4.376167600481168	6.893869315265103	7.4043555712912745	6.019023870671299
Pira12	1e-08	1e-08	1e-08	0.0118258228118659	1e-08	0.0353802493359414
Folr2	4.70017094683648	5.649900842575178	4.189381845082212	7.17344062052364	5.978967867742388	7.6008989307579755
Cxcl12	235.16738342231912	227.3939622664108	243.16183554758885	327.63442333283683	333.27438758935574	347.7251075236648
Prnd	0.1288805522599067	0.021327005001831	0.0436440865908854	0.1375524148124675	0.1274687616558263	0.2310325092581018
Cd33	0.7071229500585272	0.4852632959229397	0.6021713460639229	1.0829863419609718	1.2753344181881963	0.6396230471354731
Vwf	0.0322774876215314	0.032047435864389504	0.019128275534522402	0.0462345989628064	0.0798097645771929	0.0379712366082997
Dnai2	1e-08	1e-08	0.06642779105445079	0.09917028837468819	0.1050897408026623	0.0494492985989736
Clec4a3	1.3069698387742095	1.6852657799176898	1.9140665216789075	2.7631244860267	2.23276418799816	2.190751192929155
Ctsk	43.76376655790822	47.135052042526034	45.8355205313311	69.05316183058133	69.1657410835728	67.2969688115149
Thbs1	1793.4652608809677	1761.205524283698	1739.8689854464244	2663.625137853067	2646.411324510018	2653.3042840466724
Cd4	4.0126448625139775	4.242470048716916	4.069178256945354	6.374615035589907	6.0924744084800135	6.167602165432969
Pecam1	1e-08	1e-08	0.0064751540684638	0.0257780536475075	0.006303870650902	0.044987992211690704
Il2rg	2.0303963874843416	1.7983792381330168	1.2316954435536527	2.835743836788124	2.7738542512556386	2.4302906944285847
Trpm8	0.0882453584468679	0.1300114363712649	0.1417050894064448	0.1755738066211807	0.2562051856368346	0.1693520328260475
Cd28	0.1678922351557749	0.06452734071459769	0.12104610439971329	0.2026144307209602	0.2089055110077627	0.3222026920372972
Micb	2.107794935038166	1.193075639710032	1.8211477466931907	2.4499060321527333	2.630236044062924	3.3370453461017884
Cd74	0.0493639147085373	0.2287230154655489	0.1671658210795206	0.4658499231712538	0.3092133554092557	0.28206255507885747
Itgam	1.4073236132805402	2.1483382502030226	1.6978010652470932	2.8281396296002983	2.8360113754163905	2.5661421454182114
Cd6	1e-08	1e-08	0.0077848514933148	0.030992059239640903	0.0227367501146611	0.084994642135032
RT1-M2	1e-08	1e-08	1e-08	1e-08	0.0169824917390144	0.017313835123426
LOC689757	1e-08	1e-08	1e-08	0.0251484953336372	1e-08	0.0250795949214332
Enpep	20.785041046768583	19.578912409735665	21.128512003602705	32.2412793976619	32.32805131044501	34.326878038361734
Itga11	183.967522116168	187.70752203329306	176.327127604466	301.0586539495953	303.96309850985307	287.5742841952567
Clec4a2	0.07031395098053479	1e-08	0.1428665888528167	0.2488337238282977	0.17385926997105408	0.3190525469069639
Tcn2	31.172701993628408	34.336748931688106	30.466191455780322	52.98947364831618	55.96888463261751	49.19721821397178
Tmc1	0.022789441785558303	0.022627014321801503	0.017364177623442903	0.06912808903067169	0.09015917195611539	0.21830584833440078
Pdpn	122.43527681118391	127.93400898228069	125.53786737860266	213.52440712032745	210.92099580168977	208.14109655925012
Ly49si1	0.2480838011836505	0.0410526133009635	0.1540202442012649	0.3762611665866189	0.4498380754815673	0.3196406336552402
Ldlr	28.79709486052629	30.58267867013681	27.865052651354574	50.435999644748975	49.89025628939954	48.3449735665036
Cd40	0.4392249946157606	0.4625244687758922	0.7031300443709035	1.076620944800344	1.0531238916459131	0.8186743526405128
Cd83	0.3504321634779309	0.2319563520406153	0.2024375161566882	0.6878103540872438	1.2164749882182464	0.5612121262105518
Cntfr	0.07406057183036889	0.1155514096397987	0.0967365792265805	0.13906956071005108	0.2720687768769552	0.2240353369657255
Btnl12	0.0108456584175499	0.0021536796125275997	0.004407331402408	0.019739128939043903	0.019308326312102303	0.0371828610780941
Fcer1g	16.748009013186774	14.908436467296248	13.201002566651661	25.948636541630645	28.7737605410814	23.51180502524708
Asgr2	0.016074836629460302	1e-08	0.0326614631084087	0.4063367044606695	0.3179747868920705	0.0810446971867089
Cxcr4	0.27726253488518837	0.7708018949295665	0.2394249067469739	1.33163292192866	1.2340139494783895	0.9505573925959623
Gfra3	1e-08	1e-08	1e-08	0.1756089931610463	0.022903523269536402	0.1751278695002772
Cd209d	1e-08	0.0256934061643188	1e-08	0.10466168448141039	0.1535661891350884	0.0521874741425234
Adgre1	0.4010785684803604	0.3837392298917906	0.540815130310145	0.7668313114822161	0.7356704493120731	0.9044407478996457
Tnfrsf9	0.2299554054495426	0.0499442292511266	0.219015125760331	0.3487663789850947	0.4904097580876991	0.4927320310846445
Tnfsf13	1.1447223002424456	0.8703414240591905	1.0476986256072744	1.6892421711911447	1.9277705666729474	2.09016931918384
Cd2	0.4085974150939619	0.4056852125945087	0.8717141851530691	1.5079543989097954	1.434631420340958	1.2772195271722835
Il7r	0.12109239990068299	0.18496820425925858	0.22238249034502788	0.3531868417902633	0.4191807045214772	0.6011207614134877
Btn2a2	1.3109974807735136	1.4698945272875308	1.6036773576228684	2.7954128128862594	2.849071975629612	2.823725117869756
Fcgr3a	0.16135073998429358	0.2002509255907306	0.1639193300295947	0.876898132332005	0.7580204598192826	0.3660679548157413
LOC108348301	0.061212798690281005	0.07182678964149769	0.09610758312428469	0.20255909092935728	0.1541075505186434	0.1346694239329981
Itga8	2.8360536146556825	2.6112705826358997	2.893514418993658	5.506389812886082	5.36623533387129	5.788681437236912
Spn	0.3818148631619907	0.2659312980978419	0.2142096196102748	0.587730099010231	0.6932653782614735	0.9308962566722319
Ptprc	0.5584921298145432	0.4582740351530561	0.5439373559773472	1.1200635439238664	1.1275738993900477	1.0844158402012944
Glra1	0.6895506277445105	0.815042835166279	0.9822214979508325	1.6083870830976077	1.8475265534310799	1.9130042811103727
Itga9	0.1168573554667247	0.0757382032995087	0.136855058172628	0.2970310474124134	0.2809169615160514	0.2585763925856676
Tnfrsf11a	1e-08	1e-08	0.0346117513156014	0.0947320022351975	0.06739236199453519	0.0858840562057714
Slamf6	0.014482101513880699	0.0718943754139198	0.0735631910836178	0.2635745939004328	0.47267389164974477	0.2920582955682503
Mcam	9.539660855901909	10.134362228254085	9.625371783631929	22.29533824441724	23.29808514873643	22.308122680768562
Msr1	1.1012080221816245	1.2049266467492368	1.4360949013080637	2.5382020722650434	2.7917678489839446	3.3561131208340744
Faslg	0.0097722838857594	0.0097026338094724	0.0074458912054301	0.024702195346288303	0.019330461768964902	0.0221710669136236
LOC100910088	1e-08	1e-08	0.0066176606779485	0.016465868347745903	0.0257704004463284	0.0197049053330435
Fcgr2b	2.1320648074201642	2.3068443236275917	2.131294147316972	5.942155251661032	5.1703937685417785	5.808735872772688
Slamf9	0.0790591740240236	0.1177435366628636	0.18071490309606608	0.4996109874128265	0.8405761533041258	0.597890615472566
S1pr1	3.9801521026397984	4.299394959597406	4.099673229409434	10.495692638685417	11.767132972428437	11.104862880934268
Clec10a	1.8334557983175555	2.1160067728642233	1.7193628843541007	5.3079781321731225	5.424616033385406	5.7832759420614375
Clec2d	0.8222326914902912	0.5993620031606168	0.7613061794209661	2.5256817370459057	1.8940953886947616	1.9730302477575559
Itga7	6.8674175304271925	5.9684392437334175	5.181302597490207	17.918919326381825	17.691145097924952	17.635508134298753
Cd84	0.2020639478410752	0.1276696782951609	0.2332734798830782	0.6036416983031312	0.8902430461419307	0.6390332816520978
Csf2rb	0.2293290136338508	0.3053176397448283	0.3282896717409789	1.1119583075871404	1.536168843544815	0.9407356268372439
Sdc1	10.611117049482377	10.83248274990278	11.01195333950477	34.60672366278699	34.178430121856174	31.17025551103655
Itgad	1e-08	0.0056242821268784	1e-08	0.1317347551830911	0.11205188712010039	0.06283097011895909
Entpd1	0.7492045979046382	0.7938258473365536	0.9088136190424756	2.26693851604172	2.704088296552865	2.830137897200151
Ccr5	0.08592903283336929	0.1706331692041661	0.06789763963725849	0.6468028279519022	0.566584904792766	0.5006208857865453
Siglec8	0.0074133536522213	0.0441630484915813	0.0075313688648537	0.16490604532488978	0.2052998174223005	0.1495038600012803
Selp	0.0356922313222717	1e-08	0.06526875945103619	0.3464531863056638	0.2965304222279896	0.2303359988593737
Cd8b	0.3387980650504862	0.2429435293756543	0.15297400182412088	1.2180023266994033	1.3031152423267642	1.2716027481786158
Fcgr1a	2.052924268466584	1.8137347906663754	2.2977008387028603	8.12704439896522	7.5194960371933375	8.38546334284918
Itgb2	2.8256154879372497	3.3781705898655345	2.8112567849725583	12.564968058114014	11.481948602593457	12.037272758044807
Lilrb4	1.7739872581098546	1.985243086963039	2.0924171207079327	7.722038031023684	7.791411676466616	9.73221653737858
Tlr2	1.167378749002209	1.4873467078791947	1.4807394247329988	7.307265458359606	6.560479348470582	7.7431235192170655
Clec7a	0.1373374293921149	0.07437741308046959	0.1522077202937602	1.2055890912512328	1.0866639298486092	1.34706399019345
Il6	2.7416885981804846	1.3048311434357924	1.5883311629087737	24.74322171395451	22.43278580944411	26.091984175764107
Cd8a	0.2386573712330679	0.3723600278457445	0.1558649789914235	4.360808925420108	4.0633124640405605	3.7472402808816216
Itgax	0.0565112740219453	0.057585039652287305	0.052878455390152304	0.6510870612680949	0.6868860395536468	0.6238109744268973
Lilrb3	0.0154322626342787	0.0357519549125488	0.0104519588222216	1.1494764658580499	1.048073335554813	1.296750218842302
