# Supplementary material for: Peptide-based Self-adaptive Implant Coating Sequentially Regulates Bone Regeneration to Enhance Interfacial Osseointegration
Source: Research Square preprint supplement (doi:10.21203/rs.3.rs-5132912/v1), 2024-10-01
Supplement: Supplementary file 153 [file 390_basement membrane(GO_0005604).heatmap-data.xls]

id	S1	S2	S3	C1	C2	C3
Tf	86.09698184087955	92.56079599295572	87.63550951687795	6.246479986657218	6.273634034133513	5.948107220563589
Tmeff2	1.1612428938691581	0.7660118932932894	1.034283015520963	0.08042109847034809	0.02359978391814	0.0080200855274452
LOC100911848	1.6152878656513507	1.3773598790173993	1.274189876891364	0.3842914712780521	0.3946995996309156	0.3449147509419585
Efemp1	7.068125271252267	7.675662436887242	7.207572268252778	2.3316024159028026	1.8437969238504888	1.9955863254200743
Lama5	8.215234430238823	8.156681865014596	7.316325823843252	2.86271479436949	2.6014032072702613	2.5444677413585723
Anxa2	1661.6178533132584	1767.3382702836675	1680.3241730764362	855.940219736279	828.1565832235536	810.3294812131035
Itga6	7.760721427105	7.341424459917703	7.6913997301790715	3.7265647252838128	3.6225718311162574	3.907783473743722
Itgb4	0.580106911946333	0.4893882363804213	0.3466716544020612	0.1610147478030666	0.21750086739789548	0.2446835888779961
Mmrn2	6.2501180070072175	6.0841203740467575	5.988640142082447	3.3570908049433967	3.514266630920444	3.2362967946759307
Megf9	9.435027186838843	9.482987916521683	10.461968617769402	5.675531746943316	5.085439276013354	6.252305964869776
Lamc1	157.60156004804884	154.791120261757	151.54498917594887	95.03490093697488	93.00678525603595	93.90842344646815
Matn2	3.8096145536576254	4.5906806530554904	3.989345887131145	2.245325392516316	2.7373509410211554	2.626596802651756
Col4a4	0.0822160503652607	0.0816300707303881	1e-08	1e-08	1e-08	1e-08
Atrnl1	3.525450673766608	3.0714065512248303	3.495640158524713	2.330601717413381	2.207032185593765	2.2805549067563677
Dlg1	26.92156035153895	23.73141647062131	26.90335672085632	17.034270695490065	17.394679515427434	18.00382702220185
Col7a1	1.3730926429043548	1.133563843029204	1.4388664446422963	0.95642024088441	0.7997414035949437	0.9332880688116865
Entpd2	0.1384016834059138	0.0801589006149354	0.0820195528642967	0.0116616554153057	0.06844280294135699	0.0465187919682502
Ang	3.8621939262802543	4.1296412253691965	3.742584535192641	2.8837771387475217	2.468234332108511	2.8159622376652687
Cd151	407.49432093755615	433.07805664782023	388.4093052680757	297.62517452184386	304.92489489066554	283.38512904764224
Hmcn2	0.0014822146713736998	1e-08	0.0060232113056257	1e-08	1e-08	1e-08
Thbs4	0.7057153418903226	0.6058009946939452	0.6422675599638312	0.5723330025169028	0.3199096846341024	0.4669895117845021
Acan	0.0183837208891266	1e-08	0.018676376626042702	0.0061960136329251	1e-08	1e-08
Vwc2	0.0087004397722561	1e-08	0.0088389444899294	0.0021992896286627	0.002151290756761	1e-08
Col17a1	0.10599363901765989	0.1428232529469812	0.0999894849117375	0.10717155677113249	0.07113638154978709	0.09160965928615619
Efemp2	178.53812061142517	200.78370796337867	175.9160487261203	146.63532685327414	148.31647000111448	136.3590929589604
Loxl1	121.01881177635131	130.79235426918422	115.98258762904885	98.2258088758194	100.34002006067776	89.57948866607269
Ang2	1e-08	1e-08	0.0348121087182967	1e-08	1e-08	1e-08
LOC120101849	1e-08	0.0027848308351518	0.0113978589525434	1e-08	0.002774096983902	1e-08
Lama2	1.9611471426420504	1.5971164996247664	1.5844418522641408	1.3937529388782495	1.4020793918819638	1.4467168127390977
Col9a3	0.0624755235229422	0.062030240845255304	1e-08	0.009024268589379	0.0088273158115721	0.0359981477236403
Ptn	0.3165537483047473	0.5908794228591089	0.2186832846758456	0.3456773720405409	0.1252344608989357	0.2425879950582271
Pxdn	33.86916431979022	35.23028009004591	32.24640424449961	29.102543475499402	27.685217124172222	28.33049614331077
Col8a1	205.20255149085168	192.13079881767	204.88908264996545	168.37986747405037	164.22181312922814	180.115879950907
Col5a1	233.7657514937928	228.37470175507042	218.87007335935377	194.7483148572744	196.07963204033481	195.93188714483017
Rpsa	1712.336759321435	1845.3112225787968	1688.820564037007	1556.3958564846998	1538.8977029727655	1478.319274192361
Col4a3	0.0574574708716212	0.025671584546610702	0.0233488672815753	0.0087144087033326	0.0113656214137835	0.0521431508897937
Cask	4.0598263745554455	3.2165693583508665	4.105014072671629	3.3364760695093563	3.3799276046918645	3.53684405761544
Vwa1	5.2708365704030165	4.015528065929091	5.303256649720317	4.222534047457419	4.441158891386448	4.517589077457352
Efna5	5.164913211017637	4.949806336065397	5.2905715414318895	4.435506211986428	4.757348801596897	4.828612618636512
Agrn	2.8370333789443887	2.6710724033565563	2.9053368037374536	2.4079540409323332	2.6908139787856524	2.5978547141917643
Gsto1	37.64005338831383	38.39298650302365	42.06318219626341	36.79711499758453	36.0373128192774	35.43851973402807
Fgf9	1e-08	0.0327169488533722	0.023911700073899603	0.0237985766377958	1e-08	0.0142400287943565
Tgfb2	34.06262770245064	30.413957780311883	33.81103051467641	29.556495985047636	29.655117690102568	31.160400455547048
Fbln1	6.26582414480093	6.235718075376501	5.695511481362554	5.4833193996133565	6.044975093038138	5.653036254686294
Smoc2	39.695598068139034	39.25014853347014	38.31530532202649	37.36440773204157	37.463671716937924	36.22216796907445
P3h1	69.99614048097145	75.53152933826978	69.33977914806428	72.7463003478107	69.66703665423636	64.95264327500512
Ache	0.1470443271480116	0.20277262937512308	0.2157785732475137	0.23127757600083979	0.1858317758500337	0.1276778968727511
Smoc1	61.22296534110698	61.9484145544761	59.91540302801877	60.65692376969565	59.704432315158634	58.96380087639422
Cst3	234.89833242345804	240.31889880026262	226.4286823019367	228.0176253257943	247.10251730881043	213.67008210892172
Col28a1	1e-08	0.0057550791530848	1e-08	1e-08	0.0057328967363772	1e-08
Lamb1	89.09795448613589	84.54803186323126	84.48711854021862	91.22193627713256	88.0178510407427	88.17582432548326
Itgb1	484.4156195040514	476.8859322410463	509.7265168302234	504.3779692357724	493.541534900076	531.5995562809401
Timp1	319.23541530124714	329.33485445503555	331.774777002871	330.35981560126453	346.26611204599055	345.7231310085904
Ntn3	0.5363682469792959	0.8423899612605457	0.7232399999699509	0.9466105419653107	0.6944632088893211	0.5703436512775366
Adamts1	136.00214640902726	128.3957376466227	134.14425309272963	138.6144927709509	135.71248592111831	143.46761924113596
Col4a5	8.953675995535795	8.098934749026652	9.352546697080545	8.754322130013641	8.716558004787174	10.46404735196128
Serpinf1	373.6865765877957	404.3060596687905	368.2211281068911	421.60188924901354	413.19661379955386	379.0362215185717
Tmeff1	0.2092493927342822	0.2077580064263645	0.2181747189207855	0.1447617097623695	0.2396346755805683	0.3442552240471341
Lamc2	1.5830710451133299	1.6481319868785296	1.4979908848568912	1.6784104015582642	1.7849318313796172	1.71485914692395
Col4a1	280.8203016478587	277.11071736245475	271.15163799988665	306.4159035643247	301.7004711322021	304.2046074555721
LOC102556805	0.0206869046576927	0.0143776268471485	0.029422711642565203	0.0188251211601086	0.032736466149713005	0.0250313902326099
Col9a1	0.0058653108732214	1e-08	1e-08	0.023721940183425903	1e-08	1e-08
Lamc3	0.018180461186421203	0.0108305340281104	0.0036939842343892	0.0073530069403017	0.0359626056973295	0.01466571322187
Sparc	4139.99010086605	4180.890162478037	4174.518061484633	4889.41598457246	4930.512110436719	4767.493014475789
Atrn	14.740227463695744	14.44933434792385	14.440261153677104	17.353301912169606	16.652623938107787	17.880155215991703
Lamb2	35.42483640238172	35.23914065871266	34.2077020974775	42.892099193169834	41.92272164549258	40.35818206368368
Col4a2	209.93608247436498	207.3813900577261	199.7695718632213	255.493824362498	248.55416547204678	248.50774206014202
LOC103691573	0.2708984826514991	0.0840524143273213	0.15480618942730578	0.342386252940617	0.2260667753159552	0.21340513017522758
Frem3	1e-08	1e-08	1e-08	0.003630238663779	1e-08	1e-08
LOC120102904	1e-08	1e-08	1e-08	0.0064636595781918	1e-08	1e-08
Ush2a	1e-08	1e-08	1e-08	1e-08	1e-08	0.0120501089692534
Fbn1	100.3925077782138	94.71405493794039	93.39005277013973	123.27283176039012	121.4962850484111	125.49964537556029
Nid1	199.86514924154451	195.12849717991972	201.53880398638668	256.26633871867233	256.6417868309201	262.43410964840496
Dag1	75.08350477804046	74.48191488183521	72.52241996728534	97.29639340578635	98.48241658387603	92.98937702944319
Col2a1	1e-08	1e-08	1e-08	1e-08	0.0463464226619849	0.0047250772561259
Hmcn1	1.2492576635337012	0.987243755149473	1.0535192301828995	1.4217623448692944	1.3177163288681564	1.5795434727460251
Nid2	23.434165625595895	24.91389290785281	22.911604017266562	32.63357175669641	32.13317385118064	31.921405427778623
Runx1	5.057047390796294	4.879672249731297	4.399266772819258	6.484354536247425	6.839294887268538	6.621454807285781
Fras1	0.04017041087215	0.016249085236812403	0.0710394401020497	0.061677401111688804	0.08828970771197349	0.12901765226752018
Timp2	420.0222225090125	427.8786117019858	422.8797627187514	612.2118964666812	611.1316487728687	578.3994597096746
Amelx	1e-08	1e-08	1e-08	1e-08	0.06983751194264709	0.0237333746572609
Col4a6	0.1507123529858827	0.2146982519210208	0.07988431125145039	0.22195531490116469	0.3661725825675124	0.2543841103294235
Lama3	0.3250604242687036	0.329096836829592	0.282130037376091	0.5137130756651277	0.4493400285345288	0.4077798008920446
Papln	1e-08	0.0065132272019258995	0.0033322111655829	0.0198986314469782	0.0519049105526549	0.0099220621589712
Loxl2	90.17216647574979	88.61221775699309	89.42550392036298	134.99357616322033	132.8240348742509	134.22315949971073
Thbs2	953.6312011264688	953.7870631752196	929.4035356028842	1464.1678572047213	1435.3362665831633	1447.6974977774908
Egflam	0.171435160608312	0.08510664912606049	0.0256124037546241	0.20392980589116388	0.2443618655338476	0.3762365088384008
Fn1	2729.6458048797776	2637.775772801281	2495.5449579897063	4163.419081426961	4110.816065788546	4077.6511963434496
Ntn4	1.8449090916954112	1.8542354239139787	1.4028344010850138	2.5863991096666914	2.7202575067966257	3.1499575134782183
Hspg2	69.66910323799513	67.8774828918957	58.05205116655347	105.42403770178396	110.32211437957423	109.82299751444803
Tgfbi	4.550201750882307	4.108614408241318	4.36970097714498	7.187615838553863	6.911870077778901	7.670024539677721
Col15a1	67.86114822524716	66.03744588170447	65.61551020375484	110.5553178883345	113.42783016306683	111.59494788652661
Col8a2	57.309238783004275	57.16998775109829	56.160369118510616	98.28010194845015	99.5150529640943	99.10917194887934
Rell2	1.0218442908088836	1.5163872912802305	0.9711364084444748	2.0441809282935344	2.455989970042146	2.5482254923188057
Lamb3	0.1086419256915495	0.15896277496736289	0.11037142851545939	0.2196985382370588	0.2205590175841436	0.29405072410418437
Lama4	38.88455932508241	36.72308581380185	36.41071103349492	73.09809780293972	71.95169353765088	72.55060126744081
Vegfa	22.405975086960773	21.98885597181871	25.76419758105341	43.96869727695557	47.33862244979773	49.63629850662573
Spn	0.3818148631619907	0.2659312980978419	0.2142096196102748	0.587730099010231	0.6932653782614735	0.9308962566722319
P3h2	1.873815951562201	1.1938785114143942	1.4251893582894724	2.877420950619904	3.775953849693812	2.990785619048041
Lama1	0.0214325732733335	1e-08	0.016935152462073902	0.0698279676678122	0.0518168189106126	0.045624020063249004
Npnt	21.070530042172344	21.09823109108493	22.998512791640692	48.37080177874034	47.196990129434724	46.72785251915175
Col18a1	24.0470834520046	24.138630119426498	22.724367458340826	55.50455045951541	56.528885222016896	51.57584833549061
Egfl6	15.832390546906081	13.693473020724959	14.020262408329943	36.783602106436575	35.3544484426755	35.76930150357712
Ccdc80	417.56774375907753	412.9332633540797	414.2983195229296	1031.1438305901174	1021.5519660533046	1048.622193382246
Tnc	59.305933419237824	58.16082334036601	56.329824953160184	167.99822282554382	163.84886160209254	163.35851609205423
Frem1	0.0844586196576409	0.10358763217737879	0.08327951976430119	0.3014019156351991	0.2112904463571848	0.2805377421299727
Entpd1	0.7492045979046382	0.7938258473365536	0.9088136190424756	2.26693851604172	2.704088296552865	2.830137897200151
Ntn1	0.9269632782940388	0.8436601431530772	0.8921556772901946	5.664696331401787	5.782330925767381	5.28431678291699
Timp3	0.2363095870977554	0.1564168928366718	0.2294016265927589	8.192839986059381	7.733567588543441	7.805029369465818
