# Supplementary material for: Peptide-based Self-adaptive Implant Coating Sequentially Regulates Bone Regeneration to Enhance Interfacial Osseointegration
Source: Research Square preprint supplement (doi:10.21203/rs.3.rs-5132912/v1), 2024-10-01
Supplement: Supplementary file 157 [file 391_plasma membrane raft(GO_0044853).heatmap-data.xls]

id	S1	S2	S3	C1	C2	C3
Ms4a4a	4.5317166846784875	4.96185786415718	4.444002229289846	1.6228193347192383	1.1765447197610546	1.2566192123791822
Ezr	33.376085630312325	32.149003636100325	33.678856828588174	15.565538523771632	16.179424156472216	16.397878546373885
Myo1a	0.10659463616384339	0.0493896265763692	0.101072111740937	0.035926417619481704	0.042170794486376305	0.0143312013836761
Stim1	17.550392664171188	18.099280027331027	17.748282148859815	11.64933945650547	10.973958437924315	10.460036680520904
Chrna7	0.0582765823452359	0.0267051870053219	0.0045541864888949	1e-08	1e-08	0.0045202229581984
Flot1	59.13370810472693	64.92048679995574	56.445161209413136	42.08843500475275	45.69596511357257	40.61512871649697
Myo1d	52.63670915407238	54.6178415686763	52.04355334224385	41.12851333457835	40.412810891633924	38.44640497767577
Prkar2a	17.324315836400608	16.21018988122998	17.675751907541365	13.762516517161696	13.373779145116798	13.48955687746877
Prkaca	30.9775912380297	31.570377292190773	30.255535649519746	27.18877375598753	27.76912051527409	26.762889959795608
Ptpn11	41.870856779508046	42.69738596846121	40.89985349108594	39.353229012614484	38.37171817440022	38.87464277078163
Mal	1e-08	0.0206949549739012	1e-08	1e-08	0.0103075990484599	0.0105087093156709
Prkar1a	90.9965047438715	89.13380868879766	91.54980335316179	97.32652475036441	94.36455621732789	96.72233532203573
Slc5a7	0.0048362476685447	0.0048017782782581	0.0049132371679622	1e-08	0.019133051109559603	0.0048765959569453
Orai1	7.495681805460531	7.658602419433616	6.803330598228303	8.81276983979975	9.310067385539536	8.041591973200768
Kcnd2	1e-08	1e-08	1e-08	0.001094672248531	1e-08	1e-08
Cd177	1e-08	1e-08	1e-08	0.0070415858934183995	1e-08	1e-08
Add2	1e-08	1e-08	1e-08	0.0101146521789702	1e-08	1e-08
Prtn3	1e-08	1e-08	1e-08	1e-08	0.0148974923906494	1e-08
Lypd4	1e-08	1e-08	1e-08	1e-08	0.0166091180270219	1e-08
Chrnb2	0.17236193629805338	0.1818292990518563	0.1641617039104392	0.4139088386759147	0.1385099964127902	0.2715623944995958
Dag1	75.08350477804046	74.48191488183521	72.52241996728534	97.29639340578635	98.48241658387603	92.98937702944319
Cdh2	16.6810521800561	17.25447004616428	16.63451977930887	21.786833034764104	22.936576217761182	21.90906264390261
Lrp4	1.484451600068757	1.461790532267505	1.7614904162404321	2.1806812598297087	1.856298276992332	2.242187073443533
Lcp2	1.0672644600232402	0.8762554322061195	1.0008503627493197	1.3558238110326606	1.3329997027668001	1.3452106846070124
Tex101	1e-08	1e-08	0.0224186122500866	0.022312552439536403	0.021825585319758603	0.0222514217849063
Itgam	1.4073236132805402	2.1483382502030226	1.6978010652470932	2.8281396296002983	2.8360113754163905	2.5661421454182114
Cntnap2	0.0170653935136541	0.0190617322894744	0.0086685362033668	0.0539219875622131	0.031647094213649904	0.07098201359385109
Selplg	1.0022882839074059	1.2823340549282787	0.9635731890404449	2.1832886264991105	2.7477221342544627	1.6957219450287258
Trem2	3.571799241597226	1.8927105706639142	2.711301966362392	6.492571681219702	6.688262604237317	5.078658464361288
Adcy8	0.4168519529777879	0.40366163611123457	0.2927817904832013	0.7336951813333609	0.834751181521096	0.6642247220595896
Has2	4.975035614047939	5.711209855523888	5.907172798620413	15.142593498098657	15.087030914018586	16.51969547548886
Itgb2	2.8256154879372497	3.3781705898655345	2.8112567849725583	12.564968058114014	11.481948602593457	12.037272758044807
Cd8a	0.2386573712330679	0.3723600278457445	0.1558649789914235	4.360808925420108	4.0633124640405605	3.7472402808816216
