# Supplementary material for: Peptide-based Self-adaptive Implant Coating Sequentially Regulates Bone Regeneration to Enhance Interfacial Osseointegration
Source: Research Square preprint supplement (doi:10.21203/rs.3.rs-5132912/v1), 2024-10-01
Supplement: Supplementary file 161 [file 392_actin filament(GO_0005884).heatmap-data.xls]

id	S1	S2	S3	C1	C2	C3
Ezr	33.376085630312325	32.149003636100325	33.678856828588174	15.565538523771632	16.179424156472216	16.397878546373885
Pstpip1	0.24179072827332698	0.3395239037337456	0.3333683864205087	0.1047761939720903	0.181064728141408	0.1219039880572073
Coro1a	1.7238074958179304	1.8895195986246622	2.0454591779056965	1.143384610515467	1.2002668265363348	0.778708706174403
Arhgap6	1.3417857855684407	1.3123681715676483	1.342830928138733	0.796629945547954	0.753532559885692	0.7541201056090254
Gas7	2.190057560918945	2.0671378938363363	2.0313246503223	1.1963489521803028	1.364340973877355	1.1930712623249318
Diaph1	28.601872923823876	28.15944989340516	29.087172553318112	18.2298715298348	17.56100478903532	17.253289934636808
Pls3	265.1045049142227	245.87111524812562	282.53523705820544	165.38252762545216	162.89514165944163	191.10646521957017
Fhdc1	0.748393982656044	0.4122784243903452	0.5101420700105372	0.29780238363274497	0.3056292735314974	0.335935526786115
Twf2	8.695983323677845	9.198706828285557	8.956061556300911	6.083707931064668	6.306211658237057	6.7461864106361515
Fyn	17.069757806378995	17.605484554039734	18.19351665680005	12.305411731068364	13.471291463288452	13.956672136557605
Aif1l	4.67546468672474	5.178362103019811	4.201227079041336	3.4792589493221566	3.7848634149456157	3.353031827622393
Misp	0.06923457030758799	0.0130935535758016	0.0703367357729328	0.0066670548447848995	0.032607699109023905	0.0199463465457013
Gas2l3	1.5951281701906148	1.4503601183628827	1.4956425924443628	1.202415190930945	1.218582774590309	1.0694082869009847
Wipf1	6.318019812993356	5.8090515096228375	6.468884971060889	4.8627442756898915	4.821238390062266	4.979192043108113
Gjb6	0.0119950554028343	1e-08	1e-08	1e-08	1e-08	1e-08
Diaph2	1.4217483913885174	1.2131067645156308	1.481055376779651	0.9518142910782312	0.8678731391802409	1.380409540747719
Was	0.9422827693880936	0.801914421268395	0.8889058735203506	0.88470056283995	0.6124313611271437	0.6651009067680607
Myo9b	20.25817270880321	20.20784923983692	18.07826458826393	16.316396325317648	16.385068935147743	15.762208063315834
Ptges3l1	0.17681309992056068	0.0877764536478597	0.17962783985197028	0.0744908564145073	0.1603032243740578	0.0594294184510378
Pstpip2	0.1151782416637754	0.168526586991769	0.030792585799210202	0.0367762896276845	0.10192533498917479	0.030562945029703602
Ackr2	0.013561418720043	1e-08	1e-08	1e-08	0.0026825807122681	1e-08
Shroom4	0.24404085708842718	0.2485143597923021	0.1996120688610916	0.1847483331233036	0.2029963176199029	0.2082188894639924
Abi2	9.61666577873661	9.349032681710108	9.667899616258541	8.160674626917247	8.437063526859957	8.483731555208502
Tpm3	50.1536746567255	50.73824327501687	50.59110484137851	44.626324474764054	44.69544380196957	43.772235559541514
Keap1	13.043389933326605	13.532307717244446	12.074775571863102	11.3383612418231	11.352448172653245	11.617184715846545
Ptges3	123.1866869208251	109.90919367797372	131.80313825495364	108.01751954683273	105.42008104169271	118.04039980527847
Sptbn4	0.0945710319678286	0.09389699448467999	0.0720574045512022	0.0693259593850281	0.08651994667196569	0.0834400269328164
Wasl	11.415134448529004	11.078005930770928	11.585950929192865	10.006315563349085	10.15948872188697	11.802593647214628
Coro1b	88.93770299244011	97.73443901114588	86.55863048548237	91.31758256138893	88.13359860411956	80.16408851465638
Vps18	7.930354213302037	8.782590563054372	9.132936135858591	8.031162475890362	8.978152955885687	7.5603428098052765
Dnaja3	18.01156064738848	18.238717125388224	17.552536574719106	17.777250363833982	16.955418928398263	16.699495270350948
Gdpd2	0.0478347971216062	0.0474938635158621	0.1457888597838971	0.1289770229972937	0.0473108025618201	0.0482338783741504
Dmtn	1e-08	0.0362241355629457	0.0741299336189307	0.036889621768293704	0.009021135700347	0.055182825512799204
Cnn3	99.53846161920215	105.67234965709982	97.09920771230793	100.16371670867328	100.00478612513395	97.07268600591529
Tsc1	4.713552907703881	4.138770743521009	4.8886057365534334	4.190526728683368	4.642920274870443	4.813408438381146
Myo9a	3.87879956993894	3.0828585696090203	4.253414904666514	3.6499337510007526	3.533646533631801	4.1588013281143095
Fmn2	0.0070147395586417	0.0034823766849875998	0.06770080159717329	0.0106390374200663	0.038158396238944	0.0389029004306397
Diaph3	5.936461029862255	6.484044589142309	7.149809971709055	6.363849361901736	6.654926029811237	7.33027869054523
Yes1	8.369746594025347	8.188029129692614	10.39642543181679	8.378232262002943	9.177851610053287	10.616409674295484
Twf1	37.531007603744015	36.92824697571431	41.53384881139088	39.47201291376743	38.19511362028714	43.95632116675382
Actr3	198.04734798513655	188.48060752594944	209.71726042413601	212.8260722497087	207.69935943981812	217.57790299649
Apc2	1.0829542666055052	0.982678791009008	1.0860890831722976	1.1230658921468153	1.1338658886951225	1.1199889791166444
Amot	13.526916800013312	12.0704549404802	13.80748802042804	13.411365088410001	13.841430961697865	15.005597569608744
Actb	4024.870591861198	4373.085949730487	3911.985913364068	4588.973979297553	4562.296785633169	4186.84035351396
Gng12	29.35435359207597	27.94769153124061	30.27690376576305	30.78254516912089	31.358267609307664	34.39672104633895
Mark2	1.3380024265920731	1.1978152681130056	1.290775664335223	1.4859228060584924	1.3506874551433579	1.3937657624170166
Dapk3	17.92517015303082	17.29575510838198	16.670622680366723	19.006791041808086	21.601667366463673	19.0126119769378
Wipf2	3.3773995370170597	3.6689350623329022	3.0375905111259613	3.8769532483676445	4.037957299640404	3.742795757654063
Vps11	23.43449497904056	24.990714647279745	22.78712464223948	29.13885810819201	27.15884459474719	26.43015891069577
Potef	4.477690052174612	5.339763735968903	5.068147845498787	5.5977995511707626	6.113449083789981	5.607001312291079
Actg1	1004.9900081797816	1030.0562814238456	961.6641816116764	1195.4489166139979	1173.9654500667714	1149.816226584511
LOC102546589	1e-08	1e-08	0.0074636029923496	0.0074282935983936	1e-08	0.0148158740057117
Gas2l1	13.341238808428475	13.390949928130892	12.368346737601353	15.677785095982015	16.622243103976093	14.128994136184065
Gas2	0.0263442685950101	0.0523129995201419	0.0695854756845703	0.1065481098559085	0.0938004465210987	0.031876865601074
LOC100361457	118.94461495838262	112.93088490001708	108.27946144235443	125.7014575093517	137.33782386924267	146.6778156252665
Wipf3	1e-08	1e-08	0.0049374402574595	0.0245703692340133	0.0048068331358992	1e-08
Pls1	0.061089327918459904	0.10311166565943759	0.09309273528770519	0.0926523243870845	0.241680529278648	0.0923984807631751
Tek	0.4248608435374174	0.38582261651562	0.447415462564367	0.5500749758534744	0.6251857349033526	0.4022831375887841
Pak1	25.93421694709589	26.349699481613392	25.693183215325195	34.16343705599805	31.906725870081583	31.054227926456214
Lmod2	1e-08	1e-08	1e-08	0.0108087495203713	1e-08	1e-08
Gas2l2	1e-08	1e-08	1e-08	1e-08	1e-08	0.0270240788683695
Fmn1	2.906495692651223	2.6017903019266124	2.9916172296982335	3.426178405437569	3.4853642407264944	3.943007979994398
Myo1b	29.24783979128081	27.870149792367464	30.151972512296872	36.34849014216408	35.81632150924083	41.59876622879518
Tpm4	706.3517159575798	696.8255735340804	764.9809721000906	937.832482066997	925.1358536399204	981.6540723829988
Rac2	1.2130558391018111	1.7675107860543917	1.5684668769365377	2.405286146846986	2.02558184722763	1.7632800484681939
Tmod1	0.11064589609904249	0.1943628864479119	0.12105401539209279	0.1549045551751285	0.2862115983592501	0.2488846902699243
Cald1	319.03310225772134	297.4475780500446	331.46074091484934	420.3573834107061	417.2782205169208	472.68590247050963
Rhoq	2.2692707845942723	1.7767279035753258	2.9289506969234758	3.3521397717481873	3.095151860731128	3.761370046767333
Src	13.907358164387732	13.97566828767456	12.093084323871652	19.548264281188327	19.396334849918585	17.654262662612435
Palld	48.509726237181475	47.698192105862326	49.32830323434897	67.63730113637669	67.74000029253125	70.7961761491031
Afap1	28.15155291750198	26.04410721988525	25.866860152878402	38.45773042849573	38.88580134955133	37.42796880930739
Myo5a	9.8020775744105	8.945346572627432	9.700724181355076	13.733182702185362	13.28310643011104	14.645928008693305
Actn1	128.74223239835587	130.41233796974998	125.54001907293615	199.71067256062952	200.86699987709468	190.85701173122848
Sh2b2	0.9182322641285985	0.7750659420131621	0.9140315782696277	1.4608830552103222	1.3112248648690876	1.3101252378716348
Inpp5d	0.4471217206889632	0.42484096769366647	0.3516693572959792	0.5882039333608813	0.7513050021340014	0.586592405181673
Lmod1	30.567628181497746	30.498594774009156	30.579109727903774	51.33841982833086	50.965188888642686	50.27272340525833
Aif1	0.9749855239786217	0.8988910316899209	0.9728189892565194	1.8836215614894287	1.6358750248673488	1.439568184490269
Myh9	337.4568951156196	343.6124317705046	333.2399616375525	609.5838085063922	599.6870492713438	591.3907621679783
Tpm2	565.0548676906219	570.7154364728402	573.6311096177901	1092.5052913653585	1094.8085686511959	1083.7933604602256
Whrn	0.5871944645122108	0.6407850443661566	0.6556589792023791	1.016277495958066	1.4492894027868577	1.2748677039240095
Flna	300.05092840751234	309.2414714039287	287.3231908808174	636.1254231237388	632.1315130317603	598.245107484828
Avil	0.5855903878274056	0.4107835414174369	0.5496474880159025	0.9911207459660989	1.1142836364257729	1.1809518195477475
Acta1	10.240993071034794	9.827989470498299	9.658511308183185	24.436014205424772	23.225298176711732	19.20584941716172
Hck	0.5295080813461227	0.6400241322458433	0.7250461613316809	1.3850372518459382	1.7191274723399366	1.8571329099672886
Lcp1	2.78604452833272	2.6407368305544554	2.650688688901726	8.176344270447437	7.654237427202165	7.701654144965901
Tpm1	87.8774944221793	88.10123904616118	91.74327257614286	288.0768386618685	288.7999973933865	309.571157296058
Acta2	477.2646447564055	513.0454583460424	470.61894808874536	2576.4505323985486	2548.322585931704	2414.875298098977
