# Supplementary material for: Peptide-based Self-adaptive Implant Coating Sequentially Regulates Bone Regeneration to Enhance Interfacial Osseointegration
Source: Research Square preprint supplement (doi:10.21203/rs.3.rs-5132912/v1), 2024-10-01
Supplement: Supplementary file 165 [file 393_dense core granule(GO_0031045).heatmap-data.xls]

id	S1	S2	S3	C1	C2	C3
Syt9	0.0045369365424784	1e-08	0.0046091612194564	1e-08	1e-08	1e-08
Ecrg4	0.8624517182024704	0.7784588672964166	0.7434265949907337	0.5813574899422719	0.41357779928213667	0.5797647192654506
Spx	0.07613576442184909	1e-08	1e-08	1e-08	1e-08	1e-08
Sod1	252.26410909380928	272.6012017096636	240.69963390859544	206.81650059654024	204.7887688347477	204.4500109767816
Bace2	0.1473748209451976	0.2926488584276154	0.2495348669952596	0.06953922421716119	0.28180350677382937	0.079255660938438
Syt2	0.0030294649162225	1e-08	0.046165235590474	0.0122524962014445	0.0029962794879863	1e-08
Vps13a	2.6140353947765607	2.2158720342932905	3.2525764845230816	2.357848242538516	2.5457775816962798	2.70148767842109
Syt8	0.1134480164177725	1e-08	0.4116215057964241	0.0819348424353957	0.16029324968583838	0.32684141787412
Slc6a5	0.0134059376009597	1e-08	0.0034048451329572	0.0067774645046348	0.0132590856224209	0.003379453007106
Syt1	0.1342810286684031	0.1431998140790173	0.111155969822631	0.1609165101478522	0.12297229690454199	0.1454310498048581
Syt4	1e-08	1e-08	1e-08	0.0061752377631216	1e-08	1e-08
Myrip	0.16787998018919428	0.2588913053380117	0.1596661812824095	0.2203081771888643	0.2755573641728582	0.2773320198175809
Scg2	0.044126397672745205	0.0087623869997583	0.0268973192221502	0.026770071167673402	0.1309290576226294	0.0622923521231573
Syt5	0.0617263385328339	0.09805822685235359	0.0501671845867424	0.12482460873630159	0.1098903024207033	0.19917218806218528
Slc18a2	1e-08	1e-08	1e-08	1e-08	0.0118847307907135	0.0121166123066249
Syt7	1e-08	0.0019327177844748	1e-08	0.0177139381764718	0.007701043317363	0.0058884755159169
Crhbp	1e-08	1e-08	1e-08	0.0292681738601743	0.0143147057934602	0.0145939982916897
Cpe	55.65345063695448	57.41754530237662	58.84244553192094	170.9589458439957	172.13802001691278	170.1476837106026
Slc6a9	2.3447146399346463	2.2537769335871105	2.4303721097269646	11.537755505168892	12.119452564401863	11.547262858498717
