# Supplementary material for: Peptide-based Self-adaptive Implant Coating Sequentially Regulates Bone Regeneration to Enhance Interfacial Osseointegration
Source: Research Square preprint supplement (doi:10.21203/rs.3.rs-5132912/v1), 2024-10-01
Supplement: Supplementary file 169 [file 394_myosin II complex(GO_0016460).heatmap-data.xls]

id	S1	S2	S3	C1	C2	C3
Myl3	1e-08	0.048876220998652305	0.0250053740481736	1e-08	1e-08	1e-08
Myh7b	0.4837986035206856	0.314075277061674	0.5167054815327121	0.2038229664434148	0.2821916921565542	0.3377318506394345
Myl12b	129.95718864471857	132.56311146328338	129.7734709077835	108.41369678414027	101.57984226608166	100.8087849119744
Myh15	0.0111545122377553	1e-08	1e-08	1e-08	1e-08	1e-08
Myo18a	14.99166070796159	14.863803157196202	14.217669664088962	14.071965814480349	13.88110491856463	13.533234869141408
RGD1559821	22.126141214641148	26.806515563023066	33.80923433564675	28.284378789203586	27.809875262744928	21.80119382444737
Myl12a	641.8194858893787	671.9865787843397	618.2001157852342	659.7518292634203	659.6275699754607	647.1934284857889
Myh7	1e-08	0.0232306992197152	1e-08	0.007885832805540999	0.0269980166249517	1e-08
Myh1	0.0196304358209211	0.0038981127176838997	0.0039885956763957	0.0158788745581977	0.0232984769057545	1e-08
Limch1	0.17740086575219569	0.24516292601764028	0.2703374387528678	0.2205794958179265	0.2679284479817163	0.2683213522919606
Myh14	0.0314081126715926	0.024254424507363603	0.024817419211555003	0.0388142971649003	0.031064060237716802	0.0211134350657666
LOC102551071	16.366814708435136	17.315747736604713	17.138449851097086	19.159868694499718	20.99734730087525	18.97210210371063
Myl6	515.2918421132591	546.0801223123578	512.937511606506	630.9204559764357	623.7774318986294	607.8323926187616
Myh6	1e-08	1e-08	1e-08	0.0039566052797261	0.0232214699088755	1e-08
LOC120093525	0.4944941546738169	0.7535814545668856	0.5607808212134363	0.9767236987616816	0.8302940795587045	0.8001106337586732
Myl1	1e-08	1e-08	0.0130876923799472	0.0130257760705237	0.0637074156531583	0.025980167611756703
Myl4	0.890287371178702	1.189921936482013	0.4348366010040316	1.3848941842659521	1.778003222871008	1.985331143187645
Myh10	21.45092909934248	20.9002207103314	22.477821735733002	37.197429127306705	37.2102297477317	37.91841017351745
Myh9	337.4568951156196	343.6124317705046	333.2399616375525	609.5838085063922	599.6870492713438	591.3907621679783
Myl9	352.5355652586949	384.63746254212856	345.9954650618977	945.2494727907492	960.7792408116768	880.7848000292482
Myh11	6.244362480276887	5.946529453185534	6.780328736231947	20.784479701530337	19.48747846809368	21.27593678188573
