# Supplementary material for: Peptide-based Self-adaptive Implant Coating Sequentially Regulates Bone Regeneration to Enhance Interfacial Osseointegration
Source: Research Square preprint supplement (doi:10.21203/rs.3.rs-5132912/v1), 2024-10-01
Supplement: Supplementary file 173 [file 395_extracellular matrix(GO_0031012).heatmap-data.xls]

id	S1	S2	S3	C1	C2	C3
Ibsp	93.1253753899576	87.260219482956	95.36462949306075	0.271639967105569	0.120777948721511	0.2585823007422866
Mepe	4.409850249778349	2.9921127814993165	4.350024068416822	1e-08	0.08055622436201809	0.1055930731974644
Eln	10.638709830456738	10.962348711629213	9.950393580556932	0.7669237354391656	0.9197929812680334	0.7382200372472689
Lingo3	0.0495101399010874	0.07373589339890779	0.08802202855744959	1e-08	1e-08	1e-08
Nyx	2.5588334854777037	3.1131245178548017	3.3928638048185493	0.49801912696729	0.22575242199589998	0.30283822467788507
Omd	10.545540974521165	9.192549943831395	10.58000114697949	2.4698239672921867	2.208099396620726	2.33063484791236
LOC100911848	1.6152878656513507	1.3773598790173993	1.274189876891364	0.3842914712780521	0.3946995996309156	0.3449147509419585
Clec3b	9.157189028315244	9.25984755211815	11.2911976616304	2.1742661991310364	3.249961801083403	2.6312067480429406
Col6a1	642.1410007826793	654.1869916717245	625.30432909501	189.1343790118276	182.08781913297761	177.13521318933832
Ccn3	198.62942060123	195.41527691636304	200.4154595766388	62.435629792470095	62.46100605483173	65.62133026684037
Lama5	8.215234430238823	8.156681865014596	7.316325823843252	2.86271479436949	2.6014032072702613	2.5444677413585723
Crispld2	26.553270634532957	26.43692334242325	25.340550464804103	8.983720475930443	8.748546543908912	8.816718516769207
Adamts15	16.92158119423609	16.026920164883126	16.071466801579326	5.942388581600723	5.451874867928535	5.543128192719482
Timp4	2.644687716828073	2.407018345254167	2.2809721536520726	0.9888519126592252	0.7356704493120731	0.5972413644757372
Adamts9	4.895362111262932	4.3906786222368615	4.725845144858284	1.5765767913982536	1.812689491283028	1.5742705082251172
Tgfbr3	27.07098040517157	24.20872350321081	25.269441871084492	9.271156533077669	9.14249100505444	9.255998650833591
Hpse	20.146859920538848	19.44886924038662	19.17207002149519	6.836028308824058	7.724187963866964	6.779256376181383
Prelp	50.4032270386683	53.43728013204539	50.0869010731658	19.401153523379513	18.3231279634636	18.85322444318916
Kazald1	6.50655976363784	6.544448749847031	5.949125654407414	2.159584874803477	2.420226844546877	2.7954898007168905
Col6a2	472.0396930516432	486.3997722873854	451.7096240886099	184.5521740895891	187.84442821655404	176.4601133207149
Mmp3	7.905552774472604	7.785599568493121	8.799398443385222	3.4461045760214417	3.3328763788639404	3.281625697598449
Dmp1	0.0299778608548319	0.021260145187512902	0.056559438972049	1e-08	1e-08	1e-08
Ptx3	32.29295650506857	27.82278312098285	30.844116563422162	12.642629826125058	13.27960342426621	15.362888200417427
Tril	3.991973892332726	3.842239038551096	2.9882803337793025	1.9514726523567776	1.5850970550551229	1.5618277970263752
Scara3	69.20837571616136	72.42565151020521	71.25571134176595	35.740925514050716	33.9357018324775	34.960433525149
Col11a1	286.6589469035739	272.4645788976701	290.4201070496098	137.30029263542065	136.51216046354577	147.40066171407025
Tsku	21.710706219775172	23.70603514333356	20.415772253581437	10.94158224355161	11.418750928624629	11.017664163810059
Adamts20	0.031385644799539	0.0267102438462622	0.0364403208719455	0.0090669889955018	0.0177381977054353	0.0045210788970279
Mmrn2	6.2501180070072175	6.0841203740467575	5.988640142082447	3.3570908049433967	3.514266630920444	3.2362967946759307
Vit	0.027247673550282	0.0991960331660412	0.0461357219569294	1e-08	0.0044915409394133	1e-08
Lrrc32	10.29316014744401	10.717546807072132	9.709373187879383	5.862985895725696	6.125829852907518	5.722414237605325
Adamtsl4	38.778705624471044	38.511919141632006	38.48236168432372	23.066229787721802	23.753602173366886	22.325327195254488
Wnt11	0.0519584856665723	0.11054604835588609	0.1583568640756124	0.0375256495574022	1e-08	0.0149691415643915
Lamc1	157.60156004804884	154.791120261757	151.54498917594887	95.03490093697488	93.00678525603595	93.90842344646815
Matn2	3.8096145536576254	4.5906806530554904	3.989345887131145	2.245325392516316	2.7373509410211554	2.626596802651756
Col4a4	0.0822160503652607	0.0816300707303881	1e-08	1e-08	1e-08	1e-08
Elfn1	0.0042617485934476	0.0042313738391561	1e-08	1e-08	1e-08	1e-08
Adamts18	1e-08	0.0039900740682878	0.004082691638551	1e-08	1e-08	1e-08
Lox	605.4504554177099	578.8877107540343	602.2689845638454	369.23759116508865	371.846742257589	385.7958007818378
Gpc1	111.38185705597212	119.27701279099462	109.25023237196328	74.83302235605326	73.83673360554714	69.41265159976562
Svep1	44.809355207983806	41.169105547454016	41.79056745999166	27.186058507487985	28.12985618910464	28.284842110435402
Ecm2	0.9865924943831289	1.023515386850251	1.4777475659024828	0.7289836681968435	0.6567784403954605	0.7907571790185239
Aspn	20.21177230044539	18.23758457745725	21.70740640017012	12.508478705876437	12.498514616639492	14.638007659093212
Wnt5b	0.28143685182086087	0.46571826456322857	0.33356998127654747	0.17073869648066858	0.2505185292506841	0.2364873797028968
Adamts8	9.046240398249912	9.169174307240834	9.644791144064905	6.531389093780137	5.75272419324772	6.238574526683186
Adamtsl1	5.409876773408398	5.381511132390418	5.089273479435272	3.3484271767983462	3.695681360814515	3.57111718315336
Epyc	0.5393671996399794	0.4069974517464089	0.5479535456342375	0.14179393004058968	0.2667294213678928	0.40246164975971077
Ltbp1	116.07342901348363	114.37094548376203	114.03427443431578	76.73374286036501	75.69411759881713	78.63064790521443
Tgm2	4.52644378268389	5.3225461312708084	4.478320659948689	3.1036259664943375	3.4977392781255228	3.339970269702544
Rtn4rl2	0.419320402759672	0.8680960288600129	0.2628484072177648	0.1443337434596693	0.2470714436498974	0.1529344494756879
Sned1	9.082290276433937	8.61151404702307	9.474176917694885	6.305927767005162	6.100888920668028	6.6151111704632495
Vcan	166.28550469835463	153.58321041632627	166.4042159267647	110.39776765583255	110.45180386668396	120.31122999444999
Ccbe1	52.34353330534278	49.64032352502597	52.93838268347631	36.04339673000323	36.05258239634379	37.00109682143545
Wnt4	3.4578607221290825	3.744820102545976	3.7406485924434	2.561300325504245	2.677230977962788	2.5147255380747895
Tnr	0.0418175288050326	0.0113235024092566	0.0270347890800997	0.0096096102398742	0.0150398059817618	0.0057499734370726
Lrrn2	0.05051739414397	0.1218106705717708	0.0073316650485653	0.0072969798377393	0.0142754396361481	0.0072769880082915
Thsd4	0.8986965761240729	0.8153696210050023	0.9917103637931453	0.5505818625993429	0.6217585608404863	0.7834340065099343
Ccn2	633.493737225515	640.018813836593	652.2902691098908	466.774490791458	463.0334204492682	464.4224652502593
Col6a6	0.0024851296080179	1e-08	0.0100987338515293	1e-08	1e-08	1e-08
Hmcn2	0.0014822146713736998	1e-08	0.0060232113056257	1e-08	1e-08	1e-08
Ogn	101.94648165109693	96.11860993486435	119.32286646936961	75.76303417117059	74.45219393207124	81.0940949535442
Lingo1	0.2698254440178263	0.2060787046910218	0.2909898513025366	0.07135398732110529	0.2340242056752729	0.1506885679290604
Adamts5	32.01035336658819	29.42638983609024	31.24305636296339	22.025801436119444	22.09690871200933	23.535742310800988
Thbs4	0.7057153418903226	0.6058009946939452	0.6422675599638312	0.5723330025169028	0.3199096846341024	0.4669895117845021
Lrrtm4	0.018448174881336203	0.0274750284928147	0.0046854716701096	0.0046633052936544996	0.0091230494694588	0.004650529058279
Adamts17	0.17491435470048358	0.1736676850313264	0.075686560606004	0.0425769805183439	0.0608697779950641	0.1110500790474626
Col5a3	10.855264701134438	10.278281073127564	11.147943231127456	8.35824635993656	7.376094417386638	8.1428850744571
Ltbp4	0.8122035533213579	0.7652711148661937	0.6104302219495518	0.45670424977964097	0.5491993223250846	0.6142347723810039
Chadl	0.0073523526875314	0.036499711118385	0.018673477019362603	0.0111510850058792	0.0036359116174663	0.0074136926099065996
Mmp16	4.214634796651103	3.8179454712234278	4.01055265804312	2.9749136295249023	2.7829477070654	3.2399643698213545
Acan	0.0183837208891266	1e-08	0.018676376626042702	0.0061960136329251	1e-08	1e-08
Colq	0.028659196183968803	0.0151759690028898	0.0077641220678908995	0.0038637004764984	0.0037793761450981	0.011559324860907499
Vwc2	0.0087004397722561	1e-08	0.0088389444899294	0.0021992896286627	0.002151290756761	1e-08
Gpld1	0.0738214273817462	0.1392610208547728	0.0937457629787335	0.07837390225098599	0.0109519237886676	0.0707154475773787
Lgr6	0.1252231344760667	0.0804492345742322	0.1122499410048671	0.0409636028470756	0.07649646180900929	0.09655777730056239
Col10a1	0.0076877436445438	0.076329417436207	0.0468607117162526	1e-08	0.0304140909325986	1e-08
Col17a1	0.10599363901765989	0.1428232529469812	0.0999894849117375	0.10717155677113249	0.07113638154978709	0.09160965928615619
Efemp2	178.53812061142517	200.78370796337867	175.9160487261203	146.63532685327414	148.31647000111448	136.3590929589604
Mmp15	0.3597005700474896	0.2586163574580342	0.2709198343103065	0.100330478465679	0.17788016380432908	0.3064202502868042
Loxl1	121.01881177635131	130.79235426918422	115.98258762904885	98.2258088758194	100.34002006067776	89.57948866607269
Fcgbpl1	1e-08	0.026786326927859903	1e-08	1e-08	1e-08	1e-08
Mmp21	1e-08	0.025360805566722502	1e-08	1e-08	1e-08	1e-08
Ccn6	1e-08	0.0093700608132131	1e-08	1e-08	1e-08	1e-08
Mmp20	0.0072101864997549	1e-08	1e-08	1e-08	1e-08	1e-08
Col19a1	1e-08	1e-08	0.0065072670462604995	1e-08	1e-08	1e-08
Hapln2	1e-08	1e-08	0.0060776149050891	1e-08	1e-08	1e-08
LOC100911413	1e-08	1e-08	0.0038213221865517	1e-08	1e-08	1e-08
Mmp19	134.7954984853683	140.42135420912822	135.16491052538538	113.19058502228523	106.58381377292936	106.03675236972612
LOC120101849	1e-08	0.0027848308351518	0.0113978589525434	1e-08	0.002774096983902	1e-08
Vasn	66.86784550137789	67.6014922312525	62.65407557375434	54.48210466443663	54.95177057532862	51.82235196499837
Matn1	0.051455757102923	1e-08	0.0348499342511307	0.0260137999720637	1e-08	1e-08
Serac1	1.4650041501751307	1.3685786081887195	1.818250462044215	1.4593939775478602	1.0349686586207387	1.3680718755588048
Col9a3	0.0624755235229422	0.062030240845255304	1e-08	0.009024268589379	0.0088273158115721	0.0359981477236403
Ptn	0.3165537483047473	0.5908794228591089	0.2186832846758456	0.3456773720405409	0.1252344608989357	0.2425879950582271
Pxdn	33.86916431979022	35.23028009004591	32.24640424449961	29.102543475499402	27.685217124172222	28.33049614331077
Hsd17b12	69.21128188624813	68.01678727194506	73.7439374783737	57.12688469847053	61.73481156547122	58.45937000788403
Lgals3	222.4311361934632	243.9668397403114	221.70490706375801	194.5495572809423	202.99045238115713	181.08210520988985
Lrrtm3	0.0123259962702733	1e-08	0.10017766836269869	0.0124629761830414	1e-08	0.01864324126903
Col8a1	205.20255149085168	192.13079881767	204.88908264996545	168.37986747405037	164.22181312922814	180.115879950907
Lrrn3	0.0525016056212751	0.1107707354257151	0.0200015290252297	0.0398137983109024	0.0064908199551277	0.0529396216301651
Col5a1	233.7657514937928	228.37470175507042	218.87007335935377	194.7483148572744	196.07963204033481	195.93188714483017
Mmp24	0.044654832489759703	0.06650484024144769	0.10774353759842459	0.0846582774597689	0.0441656720803413	0.022513696794157902
Dmbt1	1e-08	1e-08	0.0211427568374801	1e-08	0.005145877351813	1e-08
Glg1	62.32267015305227	57.931046865270304	60.16580676420367	53.174431563093265	51.939554800737604	53.37861800804657
Mmp25	0.220408969277082	0.0437676170299102	0.07677179791811599	0.07640859948177439	0.0934262426519986	0.08254919696480259
Col4a3	0.0574574708716212	0.025671584546610702	0.0233488672815753	0.0087144087033326	0.0113656214137835	0.0521431508897937
Vwa1	5.2708365704030165	4.015528065929091	5.303256649720317	4.222534047457419	4.441158891386448	4.517589077457352
Coch	1e-08	1e-08	0.0456801471331998	1e-08	1e-08	0.0181357979568586
Tfip11	11.115232822627297	11.989823330079407	9.814505377451953	10.137455041930505	9.661945240667952	10.048286186281764
Emid1	0.0334438230299365	1e-08	0.11325405997336639	0.0112718358180897	1e-08	0.0674456734045323
Matn3	0.0195364948392698	0.0096986310768777	0.059542485778076804	0.0098768078703063	0.0096612485800746	0.039398961889776304
Agrn	2.8370333789443887	2.6710724033565563	2.9053368037374536	2.4079540409323332	2.6908139787856524	2.5978547141917643
Col6a3	40.447142117181286	37.15021815857742	37.841402277313684	35.635782228181725	34.75336548233285	35.5316157583819
Adamts16	0.0036089445564997	1e-08	0.0018332031271408999	0.0018245305027909	1e-08	0.0018195317836613
Tgfb2	34.06262770245064	30.413957780311883	33.81103051467641	29.556495985047636	29.655117690102568	31.160400455547048
Wnt5a	34.82760353078245	33.67217943949934	35.35313937606449	32.069197465500245	31.21457407273011	32.232282551026024
Ncan	1e-08	0.0090403705038845	1e-08	1e-08	0.0045027676077871	1e-08
Fbln1	6.26582414480093	6.235718075376501	5.695511481362554	5.4833193996133565	6.044975093038138	5.653036254686294
Smoc2	39.695598068139034	39.25014853347014	38.31530532202649	37.36440773204157	37.463671716937924	36.22216796907445
Mmp28	3.979210751450955	4.070407698458965	3.8312541449242574	3.840800397912648	3.5187812182213696	3.8965071715151054
Adamts6	9.964245067051602	8.994454536663797	11.786477423156045	9.34480843075592	9.694139921459044	10.570427401376318
Notch2	25.89080716335377	24.91042209387363	23.606495480999875	23.814093531335743	23.88184657797859	24.19862094981928
Lrig2	1.8125768999131904	1.691450803273856	2.0220786423587764	1.7921220142697185	1.7842117127719868	1.8161313475470446
Mmp23	52.69256829407968	59.01077082872161	54.32168169287952	56.52092365386304	54.97691341727685	52.0450389982209
Zan	0.0084634259199533	0.0108039886260807	0.0122830779199055	0.0061124890741479	0.010762345624127199	0.014629767870836
Col28a1	1e-08	0.0057550791530848	1e-08	1e-08	0.0057328967363772	1e-08
Muc2	0.0065677153256209	0.0032604576097845	0.0016680746428363	0.0016601832222190999	0.0048718307443521	0.0049668843177042
Nepn	1e-08	0.0127838368028014	1e-08	1e-08	1e-08	0.0129830251414923
Fgf1	1.752162045376127	1.5054035437058622	1.6113716944079197	1.5374778836100167	1.6940738591780011	1.6698495904267376
Tnfrsf11b	11.499149741833797	10.142989207201307	11.241858803637697	11.32617010820052	10.784771974868477	11.492247195003296
Fcgbp	0.0523147213358919	0.08945541471350249	0.041336973667706105	0.1087308615271925	0.034494438356108	0.052751178186287
Adamts12	1.9113172712732527	1.7946321885735035	2.010518975784698	1.8047855058314604	2.1135655942220186	1.995525195289652
Lamb1	89.09795448613589	84.54803186323126	84.48711854021862	91.22193627713256	88.0178510407427	88.17582432548326
Timp1	319.23541530124714	329.33485445503555	331.774777002871	330.35981560126453	346.26611204599055	345.7231310085904
Mmp2	617.7133433703117	647.1596844253282	604.0931237743388	670.6966692725189	657.9076942510458	624.0135343014572
Adamts1	136.00214640902726	128.3957376466227	134.14425309272963	138.6144927709509	135.71248592111831	143.46761924113596
Emilin1	45.027337875057576	45.95877592647064	42.53758139002135	46.791236927930484	45.80484174912023	47.87575939856286
Hapln3	1.6445664216080236	1.5743201655650056	1.7366184969702456	1.788002850748517	1.859748752712028	1.592906402460741
Col4a5	8.953675995535795	8.098934749026652	9.352546697080545	8.754322130013641	8.716558004787174	10.46404735196128
Sspo	0.014609636199077	0.0013186917080070999	0.0040478830448187	0.0013429176754331	0.0039408068899653	0.022766893686811503
Notch1	1.2090337707029324	1.1224674763828435	1.13940699249067	1.1839133195527682	1.260127182857272	1.241738822051653
Adamtsl5	1.9365475920782904	2.042267205779896	2.4352925339100584	2.4555239112946303	2.2000459837384883	2.16908474726327
Hapln4	0.1284416678529704	0.1083972916208245	0.24792409140630178	0.19480357417919159	0.23501415856787	0.12303758311062779
Elfn2	0.0715714547109171	0.060698231480127304	0.040899841598694	0.0814126884654674	0.042767417255977803	0.0676580338056801
Ccn1	163.9353070827254	176.4393071065223	168.54358227716173	186.03375491261465	186.90264388809706	175.96655088575918
Lum	445.7753708704437	433.2651523466568	472.0964400267912	476.20857472708803	474.9633957739858	519.8091141543501
Adamts2	5.3213020268324085	5.6554000897934005	5.041347416622953	5.3167643614401365	6.231529727888309	5.914966752901052
Col25a1	0.020279899560304102	0.046023663474321304	0.0088297519115415	0.0497985034099577	0.0171923572297327	0.0321342830083505
Lamc2	1.5830710451133299	1.6481319868785296	1.4979908848568912	1.6784104015582642	1.7849318313796172	1.71485914692395
Tnn	1014.1508803048206	982.1611466041568	974.448209813327	1092.8197025576762	1072.6825983624985	1095.8988449885703
Col4a1	280.8203016478587	277.11071736245475	271.15163799988665	306.4159035643247	301.7004711322021	304.2046074555721
LOC102556805	0.0206869046576927	0.0143776268471485	0.029422711642565203	0.0188251211601086	0.032736466149713005	0.0250313902326099
Col5a2	459.9581056634681	449.76232777197976	464.3959175308044	509.5327520704776	504.947784697565	527.2200476771061
Igfals	1e-08	0.0051431859987643	1e-08	0.0052376731016457	1e-08	0.0052233232455052
Ucma	1e-08	1e-08	0.1609040917012911	0.1334523959399255	1e-08	0.2129388269026039
Susd1	0.2152565520472281	0.4684325378276818	0.3445010591468802	0.4203899830142955	0.3791344435433535	0.4281581840609517
Ihh	0.0104217615955964	1e-08	0.0105876685450453	1e-08	1e-08	0.0630522058940258
Col9a1	0.0058653108732214	1e-08	1e-08	0.023721940183425903	1e-08	1e-08
Adamts13	0.023296172559223803	0.023130133465517202	0.0473340521376289	0.0471101202668686	0.0276491744841806	0.0469810506241725
Sparc	4139.99010086605	4180.890162478037	4174.518061484633	4889.41598457246	4930.512110436719	4767.493014475789
Ltbp3	23.04473575699427	25.144776481547478	23.18753454875633	27.651651742712012	29.45223412626415	26.610642397917143
Phospho1	1.8942575800156078	2.139360641622012	2.285240230362587	2.6694614311949247	2.775132824694968	1.9697506097293684
Adamtsl3	23.60996395748348	21.72164151549867	22.92917400154399	26.55732524020297	27.62362554732901	27.22525444639169
Col16a1	25.00379336846036	23.446384371688694	24.42947589929345	29.032804069216876	30.062069642804648	29.46143833356745
Apoe	26.08497439530461	27.708829951916858	27.722763126978283	31.188181668876144	34.218114159392705	34.40394217857564
Ndp	1e-08	0.1099143567081381	0.012496197124334	0.0621853555522666	0.1703188632225526	0.0744179783486892
Fbn2	2.6658444690974177	2.5351843831499807	2.2772426166471105	3.0366036039342195	2.9930817570457227	3.170033554861992
Optc	0.0361315760608266	0.0478320700007157	0.0611779352653688	0.0811846761160483	0.0555889880355059	0.0526254665933635
Adamts10	18.580594512519852	17.865648981746993	18.43216812187855	22.861254704644352	22.44990004425249	22.407946679821393
LOC103691573	0.2708984826514991	0.0840524143273213	0.15480618942730578	0.342386252940617	0.2260667753159552	0.21340513017522758
Gfod2	0.9252084714593817	1.0434515347195508	1.255659610408047	1.0842093911246804	1.40545903700556	1.5381341444020107
Otog	1e-08	1e-08	1e-08	0.0023801032535662	1e-08	1e-08
Lingo2	1e-08	1e-08	1e-08	0.0024648877965224	1e-08	1e-08
Spock3	1e-08	1e-08	1e-08	1e-08	0.0055759248376429996	1e-08
Wnt6	1e-08	1e-08	1e-08	1e-08	1e-08	0.0462708721031094
Mmp27	1e-08	1e-08	1e-08	1e-08	0.058657097834943	1e-08
Cpn2	1e-08	1e-08	1e-08	1e-08	0.06707068012343949	1e-08
Hapln1	0.0089436245893088	1e-08	0.0045430053190449	0.018086021737580803	1e-08	0.031563816216512004
Cacfd1	7.082279591119282	8.073550388024515	7.384636965447018	9.833604248716759	10.058028581216789	9.028436865610978
Fbn1	100.3925077782138	94.71405493794039	93.39005277013973	123.27283176039012	121.4962850484111	125.49964537556029
Olfml2a	1.6264398444901351	1.8432504694446599	1.3038249542919857	1.96280778502923	2.167450389875377	2.0021947098194297
Hpse2	1e-08	1e-08	0.0034106381319074	0.006788995690521	1e-08	0.0135407812152017
Tgfb1	46.52762031674919	47.067321560690544	39.67367879865222	59.105741163966144	61.31975529040857	52.37264547690011
Nid1	199.86514924154451	195.12849717991972	201.53880398638668	256.26633871867233	256.6417868309201	262.43410964840496
Col2a1	1e-08	1e-08	1e-08	1e-08	0.0463464226619849	0.0047250772561259
Mgp	198.4180579760909	211.94404043828584	208.09549858178804	270.9394144434013	278.1657912082072	265.5039728210809
Bcan	1e-08	1e-08	1e-08	1e-08	0.0051663109746527	0.0421368109621962
Nid2	23.434165625595895	24.91389290785281	22.911604017266562	32.63357175669641	32.13317385118064	31.921405427778623
Otogl	0.0103515967907646	0.0041111331075197	0.004206560706364	0.012559960006622	0.0122858414163334	0.0083503693058335
Mmp10	1e-08	1e-08	1e-08	0.0139681302086479	0.10930615850922279	0.0139298611348917
Timp2	420.0222225090125	427.8786117019858	422.8797627187514	612.2118964666812	611.1316487728687	578.3994597096746
Amelx	1e-08	1e-08	1e-08	1e-08	0.06983751194264709	0.0237333746572609
Ccn5	105.79630046299935	112.36571581631307	102.50674110887256	157.0751619087725	155.67844717097142	148.84253404499805
Vwf	0.0322774876215314	0.032047435864389504	0.019128275534522402	0.0462345989628064	0.0798097645771929	0.0379712366082997
Papln	1e-08	0.0065132272019258995	0.0033322111655829	0.0198986314469782	0.0519049105526549	0.0099220621589712
Mmp7	1e-08	1e-08	0.0234913773968193	0.046760474917231704	0.0457399364025409	0.1632132462465148
Lrrc17	0.08003262099776219	0.022703493814922003	0.0580762055923298	0.1271631864431912	0.0791559231949333	0.1614006414982436
Col11a2	0.046539423982694	0.0436406277479777	0.0788004911563977	0.0914989760752121	0.1764468455480419	0.0990695736730475
Thbs1	1793.4652608809677	1761.205524283698	1739.8689854464244	2663.625137853067	2646.411324510018	2653.3042840466724
Thbs2	953.6312011264688	953.7870631752196	929.4035356028842	1464.1678572047213	1435.3362665831633	1447.6974977774908
Col6a4	1e-08	0.0030105692893266	1e-08	0.0030658773373828	0.0059979206974263	0.0091724129370743
Lrig1	1.080543893708632	0.8376989537070544	0.9072690241271281	1.556512555892533	1.3566239242388156	1.447769872461867
Egflam	0.171435160608312	0.08510664912606049	0.0256124037546241	0.20392980589116388	0.2443618655338476	0.3762365088384008
Lrrc66	0.0769023147261938	0.0076354297760155	0.0937518523423567	0.1477381726225496	0.1445138144962386	0.26364924830365427
Fn1	2729.6458048797776	2637.775772801281	2495.5449579897063	4163.419081426961	4110.816065788546	4077.6511963434496
Adamts4	1.7799440429212243	1.879911705095515	2.110860130635671	2.961300060775128	3.1842331374087602	3.0461443119038933
Col13a1	1e-08	1e-08	1e-08	0.0041906905597098	0.0040992297301069	1e-08
LRRTM1	1e-08	1e-08	1e-08	0.0093850974314475	0.0091802696307726	1e-08
Adamtsl2	1e-08	1e-08	1e-08	1e-08	0.0060326844765843995	0.0061503873429171
Cthrc1	2.4534997409001496	2.552013487571081	3.244281486276526	3.721148586571284	4.256220529983815	5.65478642070632
Ccn4	14.499484629310396	13.207067394464136	13.940140447763177	22.569578107803654	21.78415643280989	24.851649980456386
Col24a1	0.0569832678749032	0.0665613279228532	0.0374584984424933	0.1626819445704823	0.08288096384378889	0.1216771807853002
Tgfbi	4.550201750882307	4.108614408241318	4.36970097714498	7.187615838553863	6.911870077778901	7.670024539677721
Adamts7	2.708043813783589	2.707677539897152	2.6387828878942647	4.639409436427198	4.5230657218883845	4.349788998390181
Col15a1	67.86114822524716	66.03744588170447	65.61551020375484	110.5553178883345	113.42783016306683	111.59494788652661
Mmp17	0.1785431382330689	0.1941535188969805	0.14395668393383018	0.263627172113858	0.3111300515690257	0.294339181640462
Mmp11	5.100893067555326	5.950310394304461	5.011491721321463	8.627803238983693	9.373765352750528	9.069827347030243
Ssc5d	6.412756675394727	6.2995079642237375	6.809715925877991	10.98707027587701	11.48738847517078	10.549969268357922
Adamts3	0.1122855802439601	0.1463244342138077	0.0570365487417736	0.2164230746554507	0.2429340589429564	0.2087537334539216
Col8a2	57.309238783004275	57.16998775109829	56.160369118510616	98.28010194845015	99.5150529640943	99.10917194887934
Mmp14	159.69256782534765	160.07174733401285	154.363771173037	276.6165730231205	280.77737829278766	272.6206613470732
Ptprz1	0.3280120219495832	0.3163022584749342	0.3044653625235762	0.551171397950053	0.5531458769912234	0.5567997881321353
Lrrc24	0.3157096050026013	0.2554114000186366	0.4632845770910508	0.8276025100659681	0.5435484489880231	0.8960780980175502
Cxcr4	0.27726253488518837	0.7708018949295665	0.2394249067469739	1.33163292192866	1.2340139494783895	0.9505573925959623
Lrrn1	1e-08	1e-08	1e-08	0.0123171073826997	0.036144847018290904	0.0614167684442558
Bmper	1.2241872824753954	1.1049655590093714	1.092926940060795	2.132645600638723	1.8974084520663743	2.3352079861312327
Rell2	1.0218442908088836	1.5163872912802305	0.9711364084444748	2.0441809282935344	2.455989970042146	2.5482254923188057
Col3a1	981.1640535291716	957.6566910066844	955.5129303693294	1845.9344289871199	1803.33433938434	1837.657893184892
Col27a1	0.7122821480440159	0.6867067792004662	0.8468465221779615	1.5082403310622223	1.2379442633274094	1.5717669818259938
Col1a2	1863.5262637035455	1878.7347332412114	1837.64184058136	3599.6595895560467	3596.011754033118	3538.2760564384503
Ndnf	3.642803029260784	3.2802359372051746	4.436900700854398	7.507719529378017	6.863916736585468	7.983165627809802
Bgn	872.4528209860413	884.1180025048905	828.8743527904053	1755.74224810541	1764.4248830816612	1632.2599878628905
Fbln7	0.1868754666519576	0.1855435463676788	0.07817369686183889	0.3667896178187314	0.6849522226464079	0.5098817105011167
Dcn	44.63079586654614	41.47822451834569	47.139190129978246	88.05926672557656	89.61252593425552	98.59010590926492
Lama1	0.0214325732733335	1e-08	0.016935152462073902	0.0698279676678122	0.0518168189106126	0.045624020063249004
Mmp8	0.07932402884487459	0.0098448414448709	0.0100733601735104	0.15038542480918748	0.19613771785679218	0.15997163375346368
Npnt	21.070530042172344	21.09823109108493	22.998512791640692	48.37080177874034	47.196990129434724	46.72785251915175
Cd180	0.1695193527526112	0.33662225992577327	0.1783686231976342	0.752949904816565	0.6646616048118666	0.5250104361538185
Mfap5	14.370534796532972	14.421768050299832	15.250657139354727	34.425482155601195	31.61871708934084	31.61142349319321
Gpc2	0.09436060893143629	0.056212846719757105	0.0383451112981025	0.15901540610535758	0.2115410936385318	0.1966388809355308
Spon1	0.029377453703716	0.0350016836829058	0.011938054771386099	0.1722827353327684	0.0871669168911947	0.1303391729266745
Col6a5	0.0222801507905858	1e-08	0.0028293631186006	0.0872950110781348	0.1680251077892449	0.09548060335885099
Tgfb3	55.64553443251943	59.20015784129221	56.74783369997554	128.95670240365047	130.1598182580928	128.60339404994602
Col18a1	24.0470834520046	24.138630119426498	22.724367458340826	55.50455045951541	56.528885222016896	51.57584833549061
Postn	22.96849927029063	22.376471597202293	24.55704572984357	53.09592393299093	52.859279423850644	56.64793576086125
Col1a1	2526.782231321241	2495.8319610587514	2367.8312553481283	5956.101136185713	6023.940456224581	5759.444283936097
Egfl6	15.832390546906081	13.693473020724959	14.020262408329943	36.783602106436575	35.3544484426755	35.76930150357712
Ccdc80	417.56774375907753	412.9332633540797	414.2983195229296	1031.1438305901174	1021.5519660533046	1048.622193382246
Olfml2b	12.249171141178147	12.161867437484172	12.390662452786797	34.051960155026684	34.75246064728365	32.843401984861806
Tnc	59.305933419237824	58.16082334036601	56.329824953160184	167.99822282554382	163.84886160209254	163.35851609205423
Reln	0.9137826624626249	0.8919701855092469	0.861013814366046	2.7515578841664445	2.266290425658999	2.6616676645512984
Mmp13	1.6744013977924277	1.6895728580767801	1.6825669427480516	5.106630951921818	5.886211722543447	5.991881041482903
Col23a1	0.640609376572059	0.6803250640872347	0.8814733466214739	3.2427421688629305	2.895274693847417	2.7228183981688647
Alpl	6.170475968353458	6.4471199410069016	5.302243212424301	25.37095627913568	23.781389831735435	23.62935076907629
Col9a2	0.1522457537829803	0.0875140649556242	0.2116528579096171	0.9884418646835746	1.2997259457592427	0.8483774410478744
Adamts14	0.5954783687829829	0.5551283016708137	0.655755961322079	2.523287697205765	2.823388947563337	2.589711497337401
Mamdc2	0.0067401806875021	0.0133842727329073	0.027389887841551903	0.1363015075099496	0.14665942673732468	0.1155388663531101
Spon2	4.051887860300765	4.185120151471292	3.750790541591904	24.766805939434857	24.43060486562661	22.70314426260998
Ntn1	0.9269632782940388	0.8436601431530772	0.8921556772901946	5.664696331401787	5.782330925767381	5.28431678291699
Mmp9	0.4997413287227106	0.5434347057568754	0.4109926970792275	5.077011613958169	5.405555238533193	4.535195543410697
Timp3	0.2363095870977554	0.1564168928366718	0.2294016265927589	8.192839986059381	7.733567588543441	7.805029369465818
Mmp12	0.9386675663310172	0.9319773867811146	1.0879218287391315	76.98396479987652	83.84233219518345	86.01140971477899
