# Supplementary material for: Peptide-based Self-adaptive Implant Coating Sequentially Regulates Bone Regeneration to Enhance Interfacial Osseointegration
Source: Research Square preprint supplement (doi:10.21203/rs.3.rs-5132912/v1), 2024-10-01
Supplement: Supplementary file 177 [file 396_stress fiber(GO_0001725).heatmap-data.xls]

id	S1	S2	S3	C1	C2	C3
Nebl	0.4181046086553572	0.3555551909848119	0.5009507690761118	0.0170617110324335	0.029669934545856	0.0132338649304324
Ablim1	0.8268943918459005	0.8004056228001741	0.7940798816875868	0.16683542020921288	0.158531575088885	0.19204813243584198
Synpo2	4.895350401719219	5.4464725664158085	4.96740235142714	1.3164236557637086	1.2247390755116356	1.3653296712360323
Pxn	20.09801761511155	19.903379675441126	18.863756325765475	8.228569750888036	8.597906292198118	7.6724889315947316
Pstpip1	0.24179072827332698	0.3395239037337456	0.3333683864205087	0.1047761939720903	0.181064728141408	0.1219039880572073
Bag3	56.835863955700255	57.77388587868665	52.66716135557836	29.762152140962172	31.536971946102497	27.896082647008647
Ror1	4.7718348170022375	4.125633648272885	4.173737120498804	2.2091374909694257	2.399553058160928	2.8586041791258103
Ldb3	0.47426413646097537	0.5133406513096022	0.48181408751598237	0.3144489745394536	0.4729137524275853	0.2116715420376032
Fam107a	0.138469130615176	1e-08	0.01480774174167	1e-08	1e-08	1e-08
Myl12b	129.95718864471857	132.56311146328338	129.7734709077835	108.41369678414027	101.57984226608166	100.8087849119744
Prickle4	1.3460905777336936	1.4089572226066989	1.070948923652258	0.8445068174914838	1.074700308159429	1.1283751978898
Sorbs1	10.000055324358152	9.29204129369321	10.17042721427182	7.857546089262239	7.970552623177363	8.153009460592921
Fhod1	12.229410146089776	13.04932769634178	12.335979607098988	10.605524669401097	10.488438791781984	10.3840628156921
Septin9	67.4174214824218	69.02425834098386	65.73061732818685	58.80031921191702	59.27141959981428	55.68543817516595
Shroom4	0.24404085708842718	0.2485143597923021	0.1996120688610916	0.1847483331233036	0.2029963176199029	0.2082188894639924
Xirp1	1e-08	0.023709302959582502	1e-08	1e-08	0.003373996791255	0.0034398262865875
Cyba	123.71700140410675	135.02781530916945	122.20572797570252	115.0762983140458	121.69074655405771	106.55158667591964
Sipa1l3	3.0117471473246464	3.223097426853959	2.782613359699604	2.7559970477625733	3.0001382589265493	2.4398959117960732
Prkcz	0.026245958226708003	0.13029443540375998	0.07554734486861839	0.0840358131987493	0.08220174730720829	0.0088216485905059
Coro1b	88.93770299244011	97.73443901114588	86.55863048548237	91.31758256138893	88.13359860411956	80.16408851465638
Mst1r	0.5695791762418064	0.3847072181549955	0.3227823921921335	0.3525973301417179	0.4713660065842615	0.3946084618680496
Mlph	1e-08	0.0075038266263491	1e-08	1e-08	1e-08	0.0076207456671575
Fscn1	90.14120870734601	95.3031112740493	89.24038925831734	94.79227948150556	94.76830735069319	89.10503734724028
Pdlim5	54.22953071731698	51.938178083481745	54.9300823551235	55.603495529723475	55.56693740459208	58.00872442369506
Myh7	1e-08	0.0232306992197152	1e-08	0.007885832805540999	0.0269980166249517	1e-08
Amot	13.526916800013312	12.0704549404802	13.80748802042804	13.411365088410001	13.841430961697865	15.005597569608744
Pdlim1	214.20969736641806	229.32307367505922	212.48457399139824	239.4135803862265	241.156270872046	225.95170120684492
Ptk2	11.310792549013073	10.722656077752449	11.184150854367832	11.471178078736322	11.78406830480799	12.70583661916198
Limch1	0.17740086575219569	0.24516292601764028	0.2703374387528678	0.2205794958179265	0.2679284479817163	0.2683213522919606
Myh14	0.0314081126715926	0.024254424507363603	0.024817419211555003	0.0388142971649003	0.031064060237716802	0.0211134350657666
Synpo	26.671801280132367	27.642116131588512	25.70120306749352	29.33167075705661	30.298665108609764	29.002331902114
Ilk	132.60321681572017	142.3571037727709	124.0434767779375	148.5255771459197	154.08213123106535	142.22162882779241
Septin11	89.11463144654843	86.26788772725988	89.38778983079713	96.32749201452067	98.07761253534035	101.55349463797086
Septin7	68.07488143243589	62.12436337157442	76.2462667608194	76.98603359394266	74.3222982000844	85.48376521470526
Gas2l1	13.341238808428475	13.390949928130892	12.368346737601353	15.677785095982015	16.622243103976093	14.128994136184065
Pdlim4	13.47569264963309	12.256033363426035	14.256219960559175	15.192200000050256	15.773279100720965	16.572589726083095
Zyx	68.40290772342188	76.6977333001795	67.56895322353677	86.57012076132722	90.31170753544103	79.39071999368782
Pdlim3	0.2359955544371604	0.1301741932245392	0.13319580299193248	0.265131328246098	0.2852793737863908	0.1454227194669153
Tek	0.4248608435374174	0.38582261651562	0.447415462564367	0.5500749758534744	0.6251857349033526	0.4022831375887841
Lima1	73.48723510179677	70.87549198762427	73.76377653304246	90.26481142119788	90.31185770114651	90.58903172692787
Actn4	205.8210007809196	208.6655313666025	197.5823123553908	262.17371618613254	262.51084982120426	254.9276610431289
Pgm5	0.6157650834707462	0.8314718075089741	0.4670904995988937	0.9546658124710833	0.95007093621977	0.6540171468832013
Enah	10.810070917374679	10.017147485721837	11.328302203963867	13.701903683421392	13.31095682467063	14.105093936356619
Tpm4	706.3517159575798	696.8255735340804	764.9809721000906	937.832482066997	925.1358536399204	981.6540723829988
Fhl3	16.60328172308861	17.221385737872147	17.563165178544427	21.60491226322815	24.956585588747384	21.675167252001888
Myh6	1e-08	1e-08	1e-08	0.0039566052797261	0.0232214699088755	1e-08
Daam1	0.6267248507705266	0.6657725290073708	0.7643390715983871	0.7784486579409635	0.9955319915629063	1.0134826243571489
Trip6	19.93738979857573	23.40061741937793	20.561036836727226	28.62433201562985	30.588152273862235	27.937960957339946
Palld	48.509726237181475	47.698192105862326	49.32830323434897	67.63730113637669	67.74000029253125	70.7961761491031
Mprip	21.64520528130563	21.003946419872978	20.55268267887429	30.53223926062173	30.034612553658793	29.590251052394276
Actn1	128.74223239835587	130.41233796974998	125.54001907293615	199.71067256062952	200.86699987709468	190.85701173122848
Flnb	34.621823922479365	35.48123685417051	33.26248016845363	54.77750762689214	54.29055537724614	51.83085948931149
Fermt2	74.11536610427918	70.15369263116563	75.58102064289521	112.18652589420626	111.39388486993272	119.33731319891098
Sh2b2	0.9182322641285985	0.7750659420131621	0.9140315782696277	1.4608830552103222	1.3112248648690876	1.3101252378716348
Myh10	21.45092909934248	20.9002207103314	22.477821735733002	37.197429127306705	37.2102297477317	37.91841017351745
Lpp	8.149931878823933	7.509422380878369	7.906448329274843	13.52058972998111	13.122174477788016	14.33754791198101
Cnn2	188.1635917863372	199.80532529047372	175.74628247150613	336.8891095394044	337.912922562599	320.8974066235316
Myh9	337.4568951156196	343.6124317705046	333.2399616375525	609.5838085063922	599.6870492713438	591.3907621679783
Fblim1	8.779236217613684	9.117096459603221	8.515206069582302	17.44628214455	18.302654855496854	16.89751119518914
Acta1	10.240993071034794	9.827989470498299	9.658511308183185	24.436014205424772	23.225298176711732	19.20584941716172
Coro2b	1.0211631205205431	0.9948746261685253	0.8039999740373409	2.361869832579485	1.9189563616718874	2.297479268689486
Pdlim7	9.755361933291013	9.862113261235505	9.176051581878907	24.09802951126353	24.670401454030866	22.944821604253068
Ablim3	0.0425198207747611	0.026385484175478903	0.048596293261299	0.225709782745264	0.1366756329563694	0.1447016151224512
Myl9	352.5355652586949	384.63746254212856	345.9954650618977	945.2494727907492	960.7792408116768	880.7848000292482
Vangl2	0.0424493101527341	0.0252880603661008	0.043125073130769104	0.10873332007884069	0.1119581422725038	0.136971052496691
Lcp1	2.78604452833272	2.6407368305544554	2.650688688901726	8.176344270447437	7.654237427202165	7.701654144965901
Mylk	4.394222343647686	4.32010179909972	4.928402782400902	17.932045215749408	17.216643767827133	18.158216118757277
Acta2	477.2646447564055	513.0454583460424	470.61894808874536	2576.4505323985486	2548.322585931704	2414.875298098977
