# Supplementary material for: Peptide-based Self-adaptive Implant Coating Sequentially Regulates Bone Regeneration to Enhance Interfacial Osseointegration
Source: Research Square preprint supplement (doi:10.21203/rs.3.rs-5132912/v1), 2024-10-01

Amplification of signal from unattached kinetochores vi...(R-RNO-141444)  
Heatmap of the Analyzed GeneSet

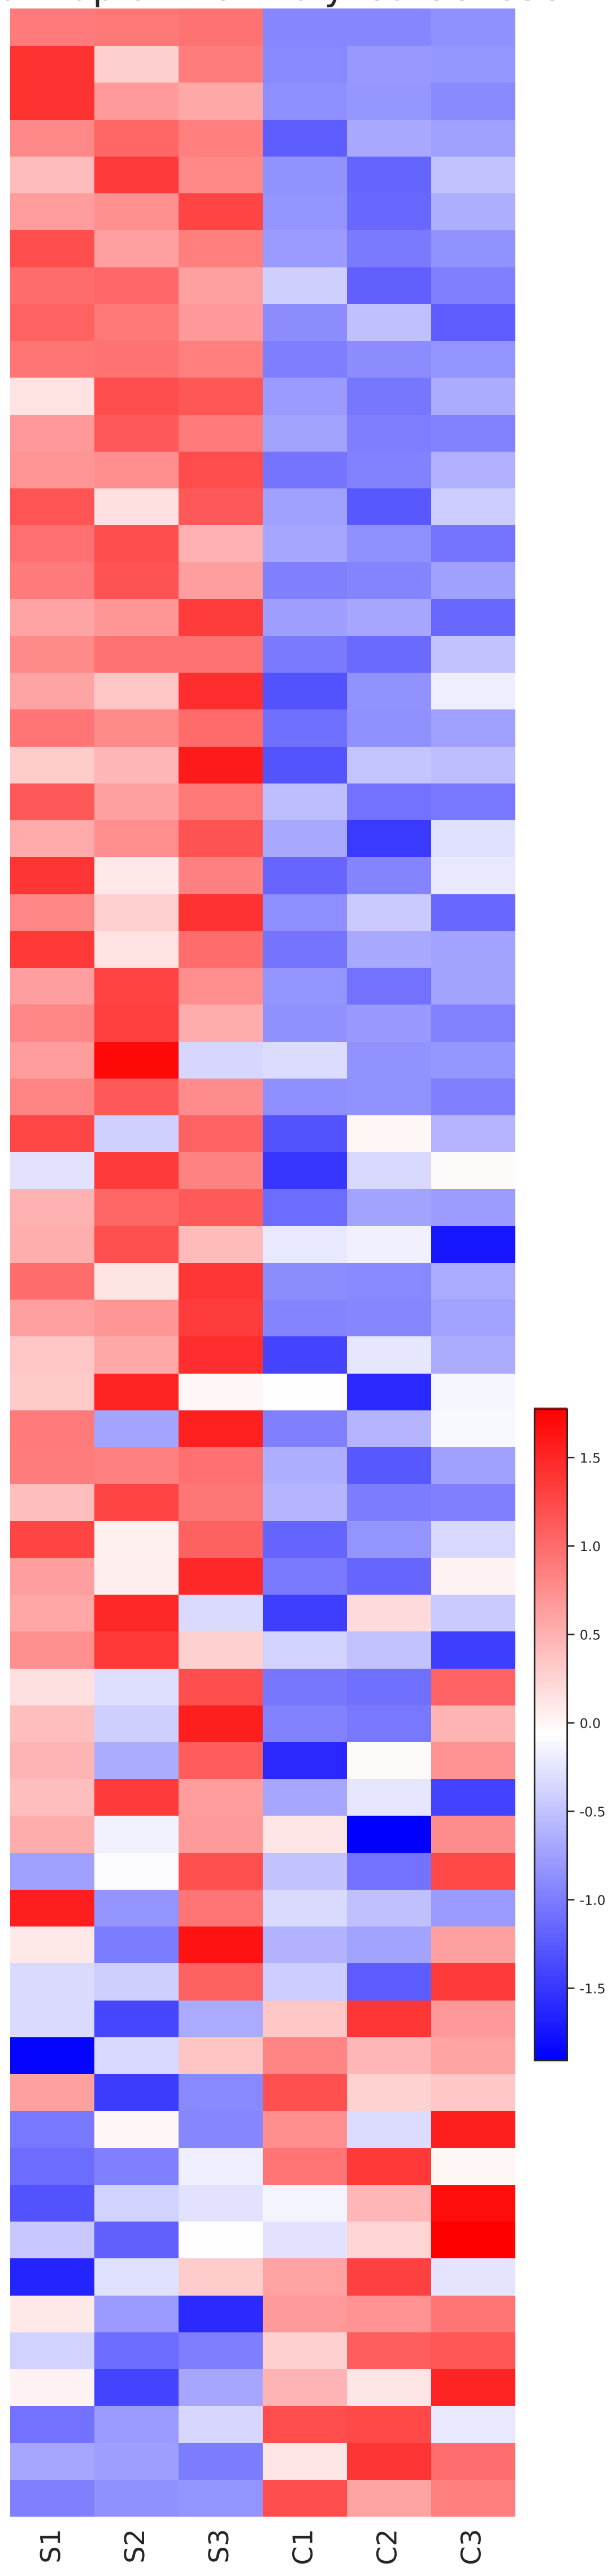

Supplement: Supplementary file 180 [file 3_Amplification of signal from unattached kinetochores vi...(R-RNO-141444).heatmap.pdf › Source data/1.RNA-Seq source data/1.BMSCs/result/1.6.GSEA/S-vs-C/rct/3_Amplification of signal from unattached kinetochores vi...(R-RNO-141444).heatmap.pdf]
