# Supplementary material for: Peptide-based Self-adaptive Implant Coating Sequentially Regulates Bone Regeneration to Enhance Interfacial Osseointegration
Source: Research Square preprint supplement (doi:10.21203/rs.3.rs-5132912/v1), 2024-10-01
Supplement: Supplementary file 181 [file 397_myosin complex(GO_0016459).heatmap-data.xls]

id	S1	S2	S3	C1	C2	C3
Myo1h	0.0127405102018806	0.0063248573205143	0.006471669998478	1e-08	1e-08	1e-08
Myo15b	0.2032773222049876	0.156713896916798	0.1870768039101517	0.016926533206076	0.0733243319736522	0.0409946572445688
Myo1a	0.10659463616384339	0.0493896265763692	0.101072111740937	0.035926417619481704	0.042170794486376305	0.0143312013836761
Myl3	1e-08	0.048876220998652305	0.0250053740481736	1e-08	1e-08	1e-08
Bmf	1.7833169976060455	1.4174398952282738	1.6310238653777038	1.0741047859469355	1.2931232561476795	1.1729466386113439
Myo1d	52.63670915407238	54.6178415686763	52.04355334224385	41.12851333457835	40.412810891633924	38.44640497767577
Myo9b	20.25817270880321	20.20784923983692	18.07826458826393	16.316396325317648	16.385068935147743	15.762208063315834
Myo6	5.404779083360498	5.2670984131231	5.571391167446772	4.7520373329371335	4.912698479161244	5.562422337167098
RGD1559821	22.126141214641148	26.806515563023066	33.80923433564675	28.284378789203586	27.809875262744928	21.80119382444737
Myo15a	0.158889721329886	0.1341843412214447	0.1335882502956188	0.13110964522338658	0.14089238954584468	0.13811665970230108
Myo5c	0.0071159287453628995	1e-08	1e-08	1e-08	0.0035189945707138	0.0035876531022095
Myo9a	3.87879956993894	3.0828585696090203	4.253414904666514	3.6499337510007526	3.533646533631801	4.1588013281143095
Myo10	12.86641637195327	12.754788799015419	12.781117145856031	13.532275529016125	13.087314460144189	13.341103112434805
Myh7	1e-08	0.0232306992197152	1e-08	0.007885832805540999	0.0269980166249517	1e-08
Myl11	0.178703554341095	0.11828658856780759	0.0605161363253912	0.030114925770594502	0.0294576732932088	0.4504861391548012
Myo1e	15.110986159322925	14.984361766997761	15.367678161422257	15.673977367606454	16.965622295718454	16.386961768527776
Myo19	2.400796771411181	2.544512511398934	2.26270137391939	2.439175749479268	2.700633670919538	2.77082539516299
Myh14	0.0314081126715926	0.024254424507363603	0.024817419211555003	0.0388142971649003	0.031064060237716802	0.0211134350657666
LOC102551071	16.366814708435136	17.315747736604713	17.138449851097086	19.159868694499718	20.99734730087525	18.97210210371063
Ccdc102a	9.598419240615996	10.271581772563092	9.549414283009328	12.219733424504717	11.450084995729245	12.314446509019884
Myo3b	0.0037247574634568	1e-08	1e-08	1e-08	0.0147357924874003	0.0037558326907667
Myo1b	29.24783979128081	27.870149792367464	30.151972512296872	36.34849014216408	35.81632150924083	41.59876622879518
Myh6	1e-08	1e-08	1e-08	0.0039566052797261	0.0232214699088755	1e-08
Myo1c	109.5785421222484	111.92653906323784	108.39073247394687	151.19078351426626	150.85976529498498	141.67346392997803
Myo3a	1e-08	1e-08	1e-08	1e-08	0.0171065420073783	0.0043600839308262
LOC120093525	0.4944941546738169	0.7535814545668856	0.5607808212134363	0.9767236987616816	0.8302940795587045	0.8001106337586732
Myo5a	9.8020775744105	8.945346572627432	9.700724181355076	13.733182702185362	13.28310643011104	14.645928008693305
Myo7b	0.0100901604084638	0.0066788331506681	0.0136677146672403	0.017003815424447902	0.053224651632047704	0.027131560960459603
Cgn	0.0087373604152011	0.0043375482823527	0.0133146743252821	0.061841156222641504	0.025924927695314702	0.0220256233258343
Myo5b	1e-08	1e-08	1e-08	0.0016916201206544	1e-08	0.001686985541949
Myh10	21.45092909934248	20.9002207103314	22.477821735733002	37.197429127306705	37.2102297477317	37.91841017351745
Myh9	337.4568951156196	343.6124317705046	333.2399616375525	609.5838085063922	599.6870492713438	591.3907621679783
Cgnl1	2.020057571894039	1.6934015457034994	1.8617403790794216	3.7456147732295966	3.6459219494336033	4.107363387584982
Myo7a	0.0450007579242676	0.0407948048518746	0.045717138154841304	0.1246327613113722	0.1083668229080859	0.08088799204043809
Myo1g	0.1569511494258186	0.1133327366784056	0.21018369370471449	0.6347814222659817	0.4939195527137901	0.6402359458912917
Myo16	1e-08	1e-08	1e-08	0.015813324423793	0.0309363935113619	0.018923997988273003
