# Supplementary material for: Peptide-based Self-adaptive Implant Coating Sequentially Regulates Bone Regeneration to Enhance Interfacial Osseointegration
Source: Research Square preprint supplement (doi:10.21203/rs.3.rs-5132912/v1), 2024-10-01
Supplement: Supplementary file 185 [file 398_myosin filament(GO_0032982).heatmap-data.xls]

id	S1	S2	S3	C1	C2	C3
Myh7b	0.4837986035206856	0.314075277061674	0.5167054815327121	0.2038229664434148	0.2821916921565542	0.3377318506394345
Myh15	0.0111545122377553	1e-08	1e-08	1e-08	1e-08	1e-08
Myom2	1e-08	0.017994236934827202	1e-08	1e-08	1e-08	0.0045686599895148
Myo18a	14.99166070796159	14.863803157196202	14.217669664088962	14.071965814480349	13.88110491856463	13.533234869141408
Myom1	0.09689298033327909	0.0440927691464398	0.1066384014020321	0.0775593966521449	0.13576141474261438	0.0569924580533439
Myh7	1e-08	0.0232306992197152	1e-08	0.007885832805540999	0.0269980166249517	1e-08
Myh1	0.0196304358209211	0.0038981127176838997	0.0039885956763957	0.0158788745581977	0.0232984769057545	1e-08
Myh14	0.0314081126715926	0.024254424507363603	0.024817419211555003	0.0388142971649003	0.031064060237716802	0.0211134350657666
Mybpc2	0.0065032287929676	1e-08	0.0066067554584847	0.0263019688438589	0.0064319908618787995	1e-08
Myh6	1e-08	1e-08	1e-08	0.0039566052797261	0.0232214699088755	1e-08
Mybpc1	1e-08	1e-08	1e-08	0.0239593375332726	1e-08	0.0298671163862953
Myh10	21.45092909934248	20.9002207103314	22.477821735733002	37.197429127306705	37.2102297477317	37.91841017351745
Myh9	337.4568951156196	343.6124317705046	333.2399616375525	609.5838085063922	599.6870492713438	591.3907621679783
Myh11	6.244362480276887	5.946529453185534	6.780328736231947	20.784479701530337	19.48747846809368	21.27593678188573
Actg2	34.450285215755954	38.05572411634197	35.37725995326843	195.98347739380085	193.04630821729322	182.7571957242582
