# Supplementary material for: Peptide-based Self-adaptive Implant Coating Sequentially Regulates Bone Regeneration to Enhance Interfacial Osseointegration
Source: Research Square preprint supplement (doi:10.21203/rs.3.rs-5132912/v1), 2024-10-01
Supplement: Supplementary file 189 [file 3_kinetochore(GO_0000776).heatmap-data.xls]

id	S1	S2	S3	C1	C2	C3
Rassf2	12.749810577412745	12.92609158467768	12.856053292385775	4.1060266244943735	4.60597861277336	4.553926486594069
Spc24	22.437724673213367	22.92604265454341	23.502422167947284	8.625930479437573	7.878029686861179	8.031737081089002
Incenp	6.584859507544794	5.97311213195214	6.46405737877113	2.3953177139451323	2.3353329777092644	2.7227094122917053
Sgo2	2.199520901654152	1.4808653470148054	1.8630957520912732	0.7100255792530247	0.780628087270033	0.7783031287284788
Cenpf	2.446125052762936	1.9021756899112416	2.8770824524855136	0.6616786367902953	0.7141932380370073	1.1422504581361514
Knstrn	5.60650153183105	5.241591794207037	5.551190828694544	2.546646868569236	2.336254712406709	2.2383529642379183
Kif2c	3.195655910560681	3.1154517812405103	3.2905990255803585	1.57903308973328	1.3514996124797216	1.3778685766392804
Mtbp	1.4194210648681915	1.2165221988122084	1.438616264865983	0.5551226903577144	0.5628733585193226	0.7291340700260377
Nek2	2.912375518031684	2.5000448167894906	2.7198819945173245	0.8052026345837213	1.4027301552546076	1.1777283207499958
Ska1	2.1255695605125626	2.9638986110938546	2.4610890088271735	0.9955812353268825	0.6956091877653761	1.3080452127405744
Cenpi	1.9291406714277248	1.9875462208193608	2.335713111169468	0.9819697732618664	0.78411303404356	1.105852957629448
Cenpu	1.8542297631227975	1.5487896271393962	1.6744424860760836	0.8332604513342873	0.7131903602715653	0.8012997624182977
Cenpm	8.366304277568934	8.437283087092917	7.323459897477765	4.415850492494844	2.2117795622650935	2.838563163818753
Cenpt	2.8422815718145333	2.7109204389441555	2.523745552336556	1.221959682997753	1.5273158133544122	0.9478092004523513
Knl1	1.9375164146164698	1.7168873610669049	2.446680562049351	0.8020845525956973	1.0752686196886572	1.2142170218915744
Ska3	2.6000857271288886	1.9676479419008852	2.601210840007632	1.2744144485610984	1.019233187553776	1.3828280375260704
Aurkb	5.8815742707038225	6.626176158747178	6.2287651434114615	3.5659676370519526	3.123227835191288	3.1841647991633817
Ndc80	1.9752373866805144	2.005175290017522	2.2618956656860925	1.006064982664817	1.0620569322687778	1.2417185894260694
Ttk	1.9278591372172627	1.7701097495747253	2.7382852207189865	0.8127107346053629	0.8129052053194832	1.261430158789516
Kif18a	0.7462523464179286	0.5405171158231228	0.739489564509641	0.3525335693243324	0.24804251453168188	0.419414117329864
Plk1	8.508179246048215	9.04787147459503	7.48090254815866	4.858141517862324	4.5278564362995075	4.082723136744948
Spag5	3.2607461464282457	3.183447242980696	3.810475056727817	1.7677701870242577	1.9984397990254807	1.756826856044682
Cdt1	1.818961053114585	2.2574959280105547	1.3537071055816083	1.0479022376404732	0.606651575185287	0.6504786413342887
Birc5	3.892487234021695	3.99314106925691	4.716440488945464	2.4059038215360826	2.4685071467523163	1.9820405651453183
Hjurp	2.1164889150453714	1.8606181540222544	1.8758097566957435	0.9975565949009436	1.0739087475851712	1.2449188473663408
Mad2l1	3.0640968639936017	3.187415522584354	3.1933271699179318	1.687659413732597	1.596602329088439	2.076153474800388
Ercc6l	0.6274728300676701	0.5701043541410307	0.8238892473412486	0.18554553479157548	0.2927355389762624	0.4476706008475837
Bub1b	2.5936890606831686	2.500092933437683	2.6349787646519056	1.3604286159717114	1.5017559870393378	1.5746453866006593
Cenpe	1.8181163326766647	1.899050492665623	2.500968097216545	0.9530893727448336	1.3848555400191132	1.3626596114462222
Sgo1	0.8864263212157493	0.9364354236618109	1.0446236191883014	0.5807876712900373	0.3857551245539247	0.6793044904715256
Cenph	1.8894912956913408	1.385891824672067	1.6774626561475725	0.8950040487896317	0.9764866055786181	1.2530056417037567
Bub1	3.1825564112359	2.836302300771473	3.579821702112984	2.074917706593962	2.3569931723379063	1.8946574783613863
Spc25	2.908607516279652	2.256822362349511	2.714140015985928	1.6120659743167205	1.8112844477057184	1.7923117476973323
Cenpn	2.6132840048973693	2.9560571402413154	2.6738491154177106	1.8590648635323852	1.7354128424016502	1.9104376385283823
Cenpw	1.212750796549655	2.2026350028499477	1.5926589623550034	0.7327461335749592	0.8191475239373239	1.207955633024086
Nup85	9.01484025284536	9.879637085463495	8.555522052498869	6.195908090098006	6.286407321413134	6.029349782957658
Zfp276	4.382296597572581	4.0276728022195	4.502195481546486	3.053795574615477	3.0261947238854967	3.0354765743131975
Nup107	9.604880928002288	8.514936461596283	9.336584567901625	6.241521366111741	6.272361798181393	6.88247567387379
Nup160	2.732346103295605	2.1820469345841897	2.6234186429252278	1.6836939085851534	1.695018405357421	1.9496943280153576
Nsl1	1.0600005798219476	0.711308078556491	1.017461247840381	0.5248028567648064	0.7953296348814787	0.6707917978708263
Psen2	7.171117953630514	6.90664399203948	6.5737295072305475	5.182599867555961	5.305646975512628	4.887509519488914
Nup133	5.854137064597192	6.332025568953652	6.41100004656482	4.424013484441193	4.7668268195440735	4.730972689427562
Zwilch	8.721876195172873	7.385294231716569	8.512448961270884	5.997431114374157	6.047896325819348	6.672351801757476
Gtf2b	25.77432432332712	23.991208678432756	27.09163126779288	19.38857520768129	19.733254028858873	20.47053281990481
Fbxo28	22.068100700681832	19.183717322127052	20.735548114763688	16.407810718450722	16.440027317306896	15.94901092659658
Mad1l1	5.60935989937482	6.193903657385257	5.541090408718754	4.966002223043999	5.019540812533292	3.6751996204517785
Dctn5	34.226188081908624	32.14262858122033	37.2610430037513	27.58492886419245	27.9352302797742	26.47959133555024
Clasp2	5.6021295082798535	5.008536605770597	5.865624221685817	4.3068421352462485	4.282848075239665	4.455079319884166
Xpo1	26.71475668331078	26.95162229932712	28.96738407860952	21.86842853813684	21.921987591412076	22.530101980530898
Cenpx	6.7093717332327225	7.211291647343117	6.286768154051133	4.544576913977889	6.539236585755847	5.583053687695679
Ncapd3	1.8214015196303919	1.7945939774474597	2.0597690803412987	1.512174706095432	1.4956988313042623	1.7074176794759248
Trappc12	20.91881042385088	20.980464855330933	21.19233590207964	17.87276033793159	17.953239252315445	16.746247439294876
Pmf1	10.719706811470537	11.038895914924792	8.673735664210225	8.460047201179158	8.725770585253976	8.188162953707941
Cenpc	1.8866492940743806	2.164135914452704	2.235260229656712	1.51257820994533	1.7185342487143151	2.016429129579795
Zw10	4.424304023012232	4.531061540147384	4.9566947877305445	3.56220899137638	4.136788592488082	3.928348170517205
Smarcb1	37.61926548432362	37.160877428993075	38.58316290311165	32.745286875822785	33.65348054906167	29.44315362285204
Bub3	29.25410827491814	31.238594209508534	32.10493008080615	26.22148738453909	27.8184682821865	24.63891715619273
Chmp4b	59.07046214519771	62.75520194975195	57.37955557410723	52.64420432144122	50.883948266110046	49.81413461867085
Dynll1	101.90785442587587	109.57451492155263	106.47023087174433	93.25563762224708	89.8401095984251	90.10506038233683
Cenps	7.592635707305903	6.167880492259593	4.939082335378416	5.522594639717772	5.253656651703263	5.325899392453722
Dync1li2	48.767305028071846	46.236393496264064	52.56351529242	41.35996269344591	40.74599482193327	46.1081392703404
Ska2	4.462367185529828	4.92857144881005	4.006264822907385	3.4276889620628483	4.276633011844593	3.941506843466916
Smarca4	30.88586685423832	31.446802022685453	31.208348393439042	27.2555987217922	27.32665573496759	27.105889282032486
Chmp4bl1	39.666655553541105	46.01136681254562	42.19962392887605	38.374576750303724	39.61129901661653	34.42657903441863
Sin3a	7.822403565363624	7.658157152385438	7.5985826047598515	6.328229752280588	7.118075889626495	6.8732111183664655
Itgb3bp	2.195055266054392	1.988815589021652	2.6624322649537215	1.6540381401988151	1.6344486455248488	2.6004974852090865
Chmp3	80.58474905137315	70.9009470847059	82.9540865811734	65.27909114110896	68.73485892144696	72.55432503484874
Dctn3	39.28206729615002	33.46900800620164	35.277546684172506	31.454336511311762	33.68295836500927	30.69384414677436
Tpr	15.442863811750097	13.753641210050485	18.795788277837925	12.903479849738215	13.52342548241993	16.253142466685052
Spout1	4.91257180823205	5.494261140495566	4.866485124904847	3.644491316998996	5.044917552293616	4.896619509254969
Chmp5	53.441045810647566	47.99330848126071	58.261706813992824	45.519251199843204	45.46114380158114	51.134079655871204
Dctn1	42.01446564958459	44.92226580171854	41.472583072697354	38.67612763015951	38.48341330270282	37.34738846322711
Ckap5	12.479101836799172	10.777256642037598	12.647589577104725	10.434744670822614	10.10420389489495	11.487198548342446
Chmp2a	49.03378219119837	51.335988683911204	54.23164731578847	46.53251570073012	45.27535472539333	46.50355299598285
Nudcd2	14.050967464232539	14.09159698475577	15.138906228727256	13.461637852711176	11.69539791017738	13.582021927930683
Nup37	4.279793303489357	4.415325795527747	4.524106783244215	3.757471844311689	3.608082177240776	4.471631615850483
Zfp207	31.672932893658906	33.81636005210807	33.93828806434442	31.61249085554308	28.55243007138842	30.17888451502804
Dctn4	27.93380862912077	26.73159674780108	28.882365894456854	24.170432329337682	24.84807604598872	27.4197754632074
Chmp1a	48.520015892735174	54.3207550795485	50.47452034524839	45.392632090874244	50.0331946189963	46.168165524128675
Rangap1	20.829088068144745	21.298579780756782	20.001472302708702	20.51517071163109	18.98677170247908	18.206665316900956
Mis12	12.309927777033904	10.79058778933296	13.153608743609277	9.530921747429725	11.63181108680327	12.63022026986997
Tp53bp1	10.000272556155048	9.59216866778522	10.351618339844077	9.024680806988984	9.276082601828008	9.78703535227793
Hnrnpu	52.61335742344656	49.07097984360606	54.24913064797001	45.96204743670467	47.99239835325121	52.68958767479023
Cenpv	3.7280601212009294	5.2421088291252484	5.097646727762904	4.441886011873819	4.863146840312036	3.982680784178787
Cbx5	12.497179822570502	10.80824410296692	13.708317285394441	10.919746688978018	11.082891101838964	12.96112949739671
Smarcc2	22.282362445145147	23.89880971430871	23.206210366620745	22.66215693796261	22.18602866506216	20.92424581775509
Phf6	7.603937357818332	6.913917735571637	8.053011599938017	6.801522179779161	6.9617831354718405	7.645671070657519
Ahctf1	7.854619690121262	7.463539642053014	7.928653359008338	7.617576645601221	6.474734716158914	7.982026235785165
Kat5	10.59315759892444	11.800546234044052	11.053497189479407	9.96433308672385	11.136374572700255	10.764257785598897
LOC102555739	0.5441481957398742	0.0926177020171442	0.0315891895329521	0.06287947956696689	0.0307535783757071	0.4075967834572003
Psen1	15.449138036798725	16.418741741704796	14.731567031793867	15.436966598932415	14.384197843990957	14.729560101974506
Cenpk	2.537948167706424	3.0875200455408986	4.136694228249802	2.735349514887393	2.26189055191317	4.190210801443421
Dctn6	40.898742998973354	44.66311191574061	42.49413633905637	40.95752987601561	40.06363934757773	41.90591372074626
Smc1a	15.461726608566885	14.998135438239707	15.32788681154698	13.535254401206284	13.943906888318985	16.70999390293673
Lrwd1	9.085194366419861	10.525653018116964	9.008219841534261	9.064853214479877	9.525028921507682	9.062013014352132
Pafah1b1	35.414546179323146	33.08710465156583	38.61588019331432	33.89511237001689	33.663644570472826	36.49690871549904
Kctd18	4.485616582708215	4.524654568672269	4.766275562920449	4.494970457078119	4.560973045735024	4.390348456828705
Chmp7	16.61913973972417	17.03461052031257	17.794228113760592	16.596694857277708	17.458603439644143	16.800826606192903
Pinx1	2.3031521824554884	1.886839554625741	2.4032107932728897	2.208294893681054	2.0254437274974744	2.288046473364108
Dynlt3	23.609719481988165	23.316757029119383	26.780793131946975	22.937067715282645	24.05117365395136	26.109081335421273
Chmp1b2	9.147087297972678	8.353808865577326	11.155163956178633	10.146296814860452	8.760593835597684	9.651490933570837
Smarcd1	6.822537868107061	6.896516222945436	6.5234332884659025	6.375518105416461	7.1294650442589065	6.6693384951174135
Champ1	6.778749572368165	7.4658412400441465	7.63913872671704	7.2195536724963185	7.07370938886584	7.594118407961679
Meaf6	3.462162268015589	3.769254464548757	3.696441720710492	3.406786747615453	4.103576064955368	3.4255311481202795
Brd7	31.503774825905392	28.98223646461205	32.753121560173206	30.27669150317416	29.38189322182915	34.028708529201474
Smarcc1	17.81542076416277	17.957350130048344	18.64527810380869	18.496662325694	18.03782658268031	18.297390192464515
Dctn2	86.56037757653598	96.4661486185118	92.07949936211807	93.88649013728475	94.54097712504772	89.6278078896688
Hsf1	9.772561429861833	10.84332831568909	10.693307811047912	10.242903090907344	11.555778664776671	9.986999857775384
Kat8	6.6241786725168135	9.31855234454427	7.630791014549903	7.8984782508108555	7.046878242274497	9.059806851563991
Chmp4c	5.401431948570216	6.867642405978034	6.342772014000731	6.875937083168429	5.9187665039620665	6.308530874460479
Ppp1cc	54.29540383265789	53.33429767653279	53.984843775241394	54.90887463354971	55.84038066153933	55.20076833211272
Smarce1	41.032804955139284	39.962768882586	43.057213243766	41.38771712429981	43.65694110827553	45.84449288835354
Csnk1a1	32.364969698891805	29.954572920109353	34.85012210897702	32.569711932695974	33.355110759572014	36.70277300712864
Nup98	15.128811201607	13.547122577312713	13.960238001684058	15.573981413996218	14.860176503630221	14.91229842803894
Dync1li1	13.636983461435612	14.554531821134608	13.717655960838337	15.221695195860905	14.277082519617338	15.932221163794285
Clasp1	9.170247436964758	9.206920558940421	8.96925236972632	9.553316990547408	10.023408012628625	10.069635834426288
Pbrm1	9.078724265591442	7.751396151594094	9.186740122214365	9.157254993216789	8.951931095751624	10.152426812829502
Nde1	8.999716024625345	9.075705724192606	9.505668159216198	10.123870204029775	10.362755622006821	9.610581371253414
Zwint	39.50296674788768	42.21045768200805	42.538671942384376	42.946217164276106	44.67574619008099	48.26626426589426
Kansl1	8.192497614969627	7.587375532651595	7.513967572352088	8.17539096780288	8.447552969314998	8.95990306300211
Tex14	0.0298058041364041	0.0098644629488521	0.0075700803496305995	0.0226027816708909	0.0319359116191453	0.0100181637166493
Ndel1	7.304037333064804	6.9636645393764125	7.023745691134738	7.61945513134231	8.00245792314817	8.032190032981264
Chmp2b	19.452813439453205	17.444096624263548	18.355221166819828	19.084567401943303	21.073015530244078	21.363584210717462
Actl6a	10.751260398656557	11.571554583434837	11.68504290831601	11.745545355700957	12.445585744874737	13.791750256423859
Chmp6	20.27390564543662	19.163678452071085	19.732024884153006	22.035884108813146	21.284390717593713	23.017585887725996
Cfdp1	13.29218583700169	13.444771578854013	14.494956281763681	14.307445125996	14.330524794951339	17.617272433770093
Apc	6.282497085721047	5.789197134903151	6.269627120254186	6.619373868544179	6.687494639186159	7.411240193891069
Ppp1r12a	17.341296301186897	15.857146653064337	17.601017930724296	18.402418672799747	19.17157232475025	19.989993046407438
Chmp1b	16.65240259113286	16.17146010115071	17.44973298255385	19.495511237001292	17.39526810878699	20.21563180109963
Septin7	68.07488143243589	62.12436337157442	76.2462667608194	76.98603359394266	74.3222982000844	85.48376521470526
Seh1l	13.147889023538955	11.22434054332362	13.784570104626347	14.495796881623187	13.822796674350075	15.614184633809687
Phf2	7.6160127248112275	7.808114416570723	7.645580657394086	9.657746764124838	8.4741580820415	8.744134924726177
Dctn3l1	1.8990050927224136	2.1211540692798594	1.1454838297306202	1.9201089252980568	1.6727744612929278	3.231306530403612
Fbxw11	16.85113714744285	16.516008255617347	16.993671555149994	20.23440997167541	19.95599521704033	20.589727533303495
Septin6	0.9427439395216565	0.8402454351181284	0.9399331220789588	1.0108573493662896	0.9974692198450424	1.295481324749057
Dsn1	1.837910597255585	1.4722468534959914	1.653098528355478	1.953027733899672	1.8602310576804015	2.215236596659544
Ss18l1	1.6388266666364146	1.4494693461195407	1.3922139364864399	1.7379864228345796	1.9096510343479327	1.8234474444786224
Nup43	4.725553784630555	4.942329141494407	5.279150937721587	6.4954536821390985	6.520018609925844	5.375438544041061
Arid2	4.042891923642674	3.649907631085362	3.902729823484723	4.645504609426896	4.541389767703024	5.127755702354652
Anapc16	10.8326939961789	11.627552400900415	12.380785715372841	15.985574464795954	14.967065386406121	12.63902544969479
Rec8	1e-08	1e-08	1e-08	1e-08	1e-08	0.0117905111581256
RGD1561890	1e-08	1e-08	1e-08	1e-08	0.020050388697004203	1e-08
Kat2b	2.8660731292861703	2.3345055789719944	2.6823109455344984	3.3910582241019234	3.5701452025496616	3.40908887473803
Gpatch11	2.540281446167584	2.4851532919525403	2.845895932996094	3.459243474491146	3.4482862410904613	3.8022625611359073
LOC102550225	0.2142363788621701	0.4963220337084176	0.2694675522545965	0.6189062927476773	0.6760286335729283	0.7406527755556749
Dync1i1	1.0239659274154096	1.1270038387362735	1.1531639089778924	2.8331543470032834	2.323827474350618	2.545254190615159
