# Supplementary material for: Peptide-based Self-adaptive Implant Coating Sequentially Regulates Bone Regeneration to Enhance Interfacial Osseointegration
Source: Research Square preprint supplement (doi:10.21203/rs.3.rs-5132912/v1), 2024-10-01
Supplement: Supplementary file 193 [file 4_outer kinetochore(GO_0000940).heatmap-data.xls]

id	S1	S2	S3	C1	C2	C3
Cenpf	2.446125052762936	1.9021756899112416	2.8770824524855136	0.6616786367902953	0.7141932380370073	1.1422504581361514
Spdl1	3.8093103928158176	4.1575607557987375	3.9179662245516793	1.089546842849893	1.8136748242561247	1.7346863181146555
Ska1	2.1255695605125626	2.9638986110938546	2.4610890088271735	0.9955812353268825	0.6956091877653761	1.3080452127405744
Ccnb1	6.127544165985409	6.593853348265486	6.1074971496636286	2.7430520308091944	2.7189612323887493	3.2315807696778416
Ska3	2.6000857271288886	1.9676479419008852	2.601210840007632	1.2744144485610984	1.019233187553776	1.3828280375260704
Ndc80	1.9752373866805144	2.005175290017522	2.2618956656860925	1.006064982664817	1.0620569322687778	1.2417185894260694
Plk1	8.508179246048215	9.04787147459503	7.48090254815866	4.858141517862324	4.5278564362995075	4.082723136744948
Bub1b	2.5936890606831686	2.500092933437683	2.6349787646519056	1.3604286159717114	1.5017559870393378	1.5746453866006593
Cenpe	1.8181163326766647	1.899050492665623	2.500968097216545	0.9530893727448336	1.3848555400191132	1.3626596114462222
Nup133	5.854137064597192	6.332025568953652	6.41100004656482	4.424013484441193	4.7668268195440735	4.730972689427562
Bod1l1	3.7398477437481055	3.7221078985938063	4.460740755094326	2.88485648192059	2.6531585775133375	3.5084789169081265
Ska2	4.462367185529828	4.92857144881005	4.006264822907385	3.4276889620628483	4.276633011844593	3.941506843466916
Crebbp	3.5835240921886493	3.65836515699468	3.6108989054446017	3.5347521787580263	3.099846772857092	3.651934057866932
LOC102555739	0.5441481957398742	0.0926177020171442	0.0315891895329521	0.06287947956696689	0.0307535783757071	0.4075967834572003
Bod1	13.206717176205878	17.788769279869737	13.120996490550741	19.55565472972595	17.352033552598414	17.413151814397242
