# Supplementary material for: Peptide-based Self-adaptive Implant Coating Sequentially Regulates Bone Regeneration to Enhance Interfacial Osseointegration
Source: Research Square preprint supplement (doi:10.21203/rs.3.rs-5132912/v1), 2024-10-01
Supplement: Supplementary file 197 [file 5_extrinsic component of plasma membrane(GO_0019897).heatmap-data.xls]

id	S1	S2	S3	C1	C2	C3
Ppl	13.198128796468401	12.23569759572838	13.006101600178143	1.7686340060924866	2.0283156000409077	2.34538241877108
Fmr1	13.944281413531776	11.752937694876456	16.156505605737323	4.257133154888866	4.192768518878358	4.802073695154638
S100a10	1096.4709939627514	1124.8844607656274	1172.027858411446	390.6661390183277	370.4918073635524	402.6378982634218
Anxa2	1661.6178533132584	1767.3382702836675	1680.3241730764362	855.940219736279	828.1565832235536	810.3294812131035
Scube2	0.1058057891342208	0.1548129944143579	0.0905180164509615	0.016891843046300002	0.055077249694499	0.0112303791651949
Mycbpap	4.302655215038326	4.468013638844889	4.4818124938683965	2.2991413511633016	2.3499643484178394	2.320301481443102
Sytl1	4.658730924655553	4.341885894529007	4.520807382069107	3.344013360034532	3.8361259210392817	2.947078176507836
Usp8	19.03598990352947	17.49212221775994	19.425829415713142	13.119656880268074	13.807934222572895	15.932492596143177
Aak1	9.406859331806713	8.914811994910682	9.460969092251705	7.192669915568932	7.2422809977310525	7.567506516816995
Nlrp10	0.0093184750236895	0.08326845447586219	0.0568008605651547	0.0188440541067474	0.0092163981613935	0.037584842499338
Epn3	0.3917075668961225	0.3939018428181952	0.4183506224233569	0.3148174433685269	0.3178803723241704	0.3443376578205521
Stoml2	27.95621729857068	29.376943949624447	26.298960882991828	25.188722920171053	23.28108443211216	22.99296346597001
Numa1	16.07870848613867	16.487081997271126	16.14158899914521	14.121585349471497	14.64583947828607	14.58663859447992
Prss8	1e-08	0.2342427929654615	1e-08	0.0542150417880947	0.0530318087275837	1e-08
LOC108351291	0.5936044017179829	0.9495463431757682	1.5746414167884708	0.6002011864306513	1.3699044352928156	0.4322910169465989
Dnaja3	18.01156064738848	18.238717125388224	17.552536574719106	17.777250363833982	16.955418928398263	16.699495270350948
Numb	9.905181936979519	10.259231851993828	9.414257737864615	9.357185232557752	10.139990898518075	9.056540130602427
Eea1	5.336800806352262	4.628805111727293	5.795673325890936	4.586974754137076	4.952925210578118	5.791812961144746
Eno1	646.5173372321811	693.7475281144756	630.8477534980839	659.570358354701	657.0108091534362	611.4018021272661
Plg	1e-08	0.043263641745218503	0.008853583873516	0.0704935191280755	0.0172387603261692	0.0175751037395689
