# Supplementary material for: Peptide-based Self-adaptive Implant Coating Sequentially Regulates Bone Regeneration to Enhance Interfacial Osseointegration
Source: Research Square preprint supplement (doi:10.21203/rs.3.rs-5132912/v1), 2024-10-01
Supplement: Supplementary file 201 [file 6_cyclin-dependent protein kinase holoenzyme complex(GO_0000307).heatmap-data.xls]

id	S1	S2	S3	C1	C2	C3
Ccnd1	235.5723156204571	230.54435733474	240.2908752556232	78.22491203950719	78.42743659374106	79.86520360317166
Ccnb1	6.127544165985409	6.593853348265486	6.1074971496636286	2.7430520308091944	2.7189612323887493	3.2315807696778416
Ccne2	1.8764803973981519	1.5811887567442018	2.351586318753554	1.1359038585003443	0.7997571381728963	0.921171333537607
Ccna2	8.507977483441698	9.338513823572733	10.056161487752584	4.665560973017762	4.663763055729668	5.098935374699298
Ccnf	3.0316607637092514	2.7439711153346216	3.23306799447902	1.5806602907201934	1.6289928144894583	1.632627174609595
Ccnd3	102.36404431039183	110.64661880553419	97.42762331666175	59.48700703574378	61.07934891591518	53.58569802936757
Pcna	38.619992709025105	37.71646586305575	35.41914970491197	22.93004206155065	20.652996295704575	21.529353482486098
Cks2	16.64394335043746	15.64752853442245	14.253463448693513	8.78368006925766	10.150699521254817	8.333262090712598
Cdk6	19.141701453881698	17.061484729892268	19.08589690279556	10.631079311801965	10.246962239943441	11.540284350250786
Cdk1	15.272179921277324	17.267849429080112	15.51530227525721	9.598524579023922	9.299448489796799	10.028917301520467
Cdk5r1	0.8470577836134685	0.6454343670562469	0.4402774848049472	0.25893316681289047	0.4286310674028468	0.2383603911501277
Cdkn1a	225.2471563782602	244.81389495302528	229.08205393192696	155.36096672887274	156.42312077928767	141.03910800197
Cnppd1	24.11793429536865	24.481467305488962	24.493446254877657	15.812704950756377	15.549651794443372	16.104010986530692
Ccng1	221.6112544195417	208.15941161000023	233.60885266067268	148.4843325047491	148.15822945959954	160.41856136988375
Ccnl2	14.97592637931661	13.129536700911775	17.7162670291143	10.54600828844303	11.682945602195499	11.92561328314427
Cdk11b	25.716324946901818	26.04869767461709	28.34815491862757	21.689645078314836	20.8738235716972	22.788699456802004
Ccne1	8.599725395166304	8.181705480210532	8.018386748114342	7.007798397909125	7.336299120907801	6.427641059859253
RGD1566355	1.0840257613169761	0.7995368245835791	0.8810261525789467	1.1117308279667808	0.3522782136077977	0.5933806928762392
Ccna1	0.3155446143597987	0.1904346016385955	0.0942846724549635	0.13137406769272938	0.15910372054889618	0.1434916722523393
Cdk12	4.0072894220389985	3.77162153415326	4.275220030313611	3.3010552764821983	3.584845023374548	3.73390488153242
Ccnc	5.6295394185268615	5.168455722875149	6.2815016824845005	4.691815512026025	4.851503529268372	5.688381686624192
Ccnl1	9.751545998282168	8.333549736473712	10.520026070354568	7.7455197878773125	8.500435643520118	10.129990678769605
Ccno	0.0259487438358302	1e-08	0.1449900167713826	1e-08	0.0256644947321654	0.07849567524450779
Cdk16	35.45796204572366	38.17106954830671	35.86371076503398	36.376457709285724	35.32295695060363	33.529412715551054
Ccny	31.71190129374343	30.9368959931827	31.704569001294146	31.63679455971564	29.305721647074186	30.92698661580743
Cdk5	18.3440033481778	19.062268637172597	20.66303101097049	20.688791779398763	19.915077441299985	16.93680654249672
Cdk2	2.404957343104207	2.7653021419868598	2.622892759286095	2.440623887621726	3.086949725567457	2.309119911011186
Cdk13	4.011308401742003	3.9145504888211695	4.195485002802415	4.076712589222588	3.9520888042398776	4.5051552033357884
Ccnq	5.044844053855999	5.9985471531567685	5.2078182007340565	5.9853395194056604	5.5328021040530695	5.4766574100597865
Ccnj	0.4798359423210809	0.5244755081848989	0.42547124657046137	0.4958080646410165	0.4808241656733917	0.5432580137660957
Ccng2	19.913842486043926	18.44997878479064	21.37912096101603	20.261052200415282	22.120953413222423	23.151378785871803
Cks1b	18.71958380290517	20.01362739026229	16.9608254895058	19.965965263184685	20.77805589570051	21.656827601932676
Cdk14	25.501086864924442	24.34502700611133	26.71684305385389	29.2395394803047	28.72074761685561	29.03454398149529
Ccni	46.45661549613197	44.80666057612105	46.11660647231452	53.74024704197093	53.25392193711854	49.39336658806323
Ccnd2	23.343308466521894	27.58287835264045	23.23857769938655	33.62626384502021	30.67305232479705	27.978884273439746
Cdk5r2	1e-08	1e-08	1e-08	0.06519091003437069	1e-08	1e-08
Cdk4	94.60685663186159	95.4238353010622	89.50673794187635	117.49132124537799	125.02865519186156	113.57024263935315
Cks1l	2.7837906956648286	2.92279742771941	2.3079951116464246	3.526497342568741	3.8609442840652988	3.1941901717232994
Ccnjl	0.1762646722222959	0.10938024025908079	0.1119191797317448	0.4084288847113045	0.3341398197495799	0.1999521349443301
