# Supplementary material for: Peptide-based Self-adaptive Implant Coating Sequentially Regulates Bone Regeneration to Enhance Interfacial Osseointegration
Source: Research Square preprint supplement (doi:10.21203/rs.3.rs-5132912/v1), 2024-10-01
Supplement: Supplementary file 205 [file 7_mitotic spindle pole(GO_0097431).heatmap-data.xls]

id	S1	S2	S3	C1	C2	C3
Aspm	1.7240003693827772	1.327302782748162	1.439747361372649	0.5958256625200207	0.7104646833689627	0.6408447883420779
Aurkb	5.8815742707038225	6.626176158747178	6.2287651434114615	3.5659676370519526	3.123227835191288	3.1841647991633817
Plk1	8.508179246048215	9.04787147459503	7.48090254815866	4.858141517862324	4.5278564362995075	4.082723136744948
Spag5	3.2607461464282457	3.183447242980696	3.810475056727817	1.7677701870242577	1.9984397990254807	1.756826856044682
Aurka	4.564909144572717	4.157649797667525	4.646708377780113	2.153359347729248	2.86180920409052	2.600510260692099
Kif20b	1.142495528706639	0.9277383807204133	1.7161530909474432	0.552841984330766	0.500419869976654	0.7611608744430167
Gpsm2	2.2291425951051345	2.0806634928771204	2.395079953250205	1.5787793686631852	1.0972819928003936	1.5174835457147304
Fam83d	1.8302375554144978	1.992069176388152	1.8671534548390447	1.2930811200527108	0.9618994195727121	1.3590344901927507
Nsmce1	5.394850299136211	5.547175372891992	5.751015217299237	3.3849672980908423	3.6400073365962218	3.725930853508811
Cntrl	1.7487480084279223	1.5885152689274318	1.9830314697101343	1.145990313746956	1.2879938761593075	1.402589362685769
Katnbl1	5.428009193064597	5.456062891011378	6.060739453642138	3.840132668979928	3.8394269620804318	4.566727210697376
Smc3	13.85349412211992	12.370925108765741	15.046497380855165	9.508473615346357	9.789929206505125	12.340938436208525
Rmdn3	17.253138001361165	17.464785234696592	17.78182183970261	12.784113599419257	13.838406834332405	13.933010624442092
Stag2	8.359664523535637	7.521750452639007	9.680814826247142	6.474236993579639	6.2566757934926525	7.029906348411625
Map10	0.6273499033993688	0.5302885248199649	0.663174853001938	0.5057429832258276	0.209620868558011	0.5300026667857776
Mad1l1	5.60935989937482	6.193903657385257	5.541090408718754	4.966002223043999	5.019540812533292	3.6751996204517785
Rmdn2	0.5353336710913674	0.5635159286723262	0.5420368904441756	0.4290436285192111	0.4639498540334564	0.4423109655444305
Cdk5rap2	3.764753689621143	3.4261146202909587	3.916939648609066	3.0873563437106863	2.698144035463537	3.403193081575964
Bccip	25.33242506798695	22.53546697881811	25.950652134002873	20.01271927946686	20.01350294959565	22.964180007337198
Numa1	16.07870848613867	16.487081997271126	16.14158899914521	14.121585349471497	14.64583947828607	14.58663859447992
Rae1	18.073907297870807	18.615342358465735	18.038135211072717	16.14979182236084	17.510592168235814	15.784462083564437
Smc6	7.3705801554617265	7.332720484834327	9.53723859708779	7.138701088155233	7.227721979917891	8.285177263196244
Rmdn1	7.028023833912015	6.859662843965134	6.978551240432661	6.289792227821488	6.15251867378282	7.113349737498032
Tnks	10.60226498067078	9.852436775040555	10.624143834219108	9.187528792376675	9.612706933155087	10.659474522133815
Kat5	10.59315759892444	11.800546234044052	11.053497189479407	9.96433308672385	11.136374572700255	10.764257785598897
Smc1a	15.461726608566885	14.998135438239707	15.32788681154698	13.535254401206284	13.943906888318985	16.70999390293673
Nin	2.464522585849858	2.2513783837687984	2.74253387448267	2.3402688898356794	2.3378991863957883	2.5911682877741278
Arhgef7	5.356873643060795	5.595275368973884	5.4146024445038625	5.7728459459848045	5.3201368073031094	5.289706162066121
Katna1	5.0969464688294615	4.548151186607565	5.8204311463315	5.479765882371397	4.607194602280359	5.425718778637744
Hsf1	9.772561429861833	10.84332831568909	10.693307811047912	10.242903090907344	11.555778664776671	9.986999857775384
LOC120095234	0.0656606019640648	0.020059274070266003	0.041049771457923205	0.0408555697911649	0.074932312638975	0.025464776259817003
Ttc28	9.87409669345982	10.112661678157849	8.73235269054918	10.256496098274305	10.55675753791109	10.298752988785234
Mapre1	55.24624721128172	51.79591099635824	57.08185864641279	56.04696819465747	58.40791506339156	65.43662446316438
Git1	16.949982364647855	18.52983262469569	16.800429366049098	19.063376433399768	20.018448361538322	18.222122906431093
Stag1	2.2940100746073737	2.158153093512894	2.229827225802149	2.489528979898565	2.4141873133311855	2.5737349959299416
Fam161a	0.43208430972983747	0.137281513593295	0.272156932133078	0.3582466083731856	0.2649577150588068	0.4792580634621334
Mapkbp1	1.5172138101147503	1.5897329227763437	1.8102860956601703	1.8670016183872056	1.9858922965519856	1.81306081692282
Ypel5	27.977867230891	26.40964166673797	27.11895428366619	34.735878647555126	33.270436840373456	35.118574065428106
