# Supplementary material for: Peptide-based Self-adaptive Implant Coating Sequentially Regulates Bone Regeneration to Enhance Interfacial Osseointegration
Source: Research Square preprint supplement (doi:10.21203/rs.3.rs-5132912/v1), 2024-10-01
Supplement: Supplementary file 209 [file 8_mitochondrial respiratory chain complex I(GO_0005747).heatmap-data.xls]

id	S1	S2	S3	C1	C2	C3
Wdr93	0.3195833423645963	0.3461515313303329	0.2538336024458282	0.15275468704986228	0.1781556202726701	0.1347589281447123
Ndufb4	196.2099660052964	177.90583843417895	193.1169884723381	114.64054776693091	119.24313158849552	120.45189231895283
LOC120094308	1e-08	0.0068421105501605	0.0070009297364211	1e-08	1e-08	1e-08
Ndufs6	5.456503052592527	6.908698934225996	4.9330878340830315	3.391270598838726	4.753084285978214	3.886752426661192
Ndufc2	86.31365265442776	84.81843487715152	85.50087250090905	64.31305983655496	59.277640102162934	56.093151642762
LOC100361934	9.523906125911806	9.456026245008161	10.744638239073216	8.033655707068933	7.285862064520309	5.889355338483767
ND6	38.961848873037795	34.879156594914974	49.82523552140415	29.15402367045764	24.998147686739788	35.146597970956094
Ndufb3	55.16806156222742	54.72653774447768	55.35406344259407	36.29342560660165	41.01305993810286	42.23041244432362
Ndufc1	47.97838123928837	50.23878440307818	49.87045411290627	36.11416860708932	33.04121844004118	39.06128883742644
Ndufb6	58.98850581712354	64.54822431180845	68.68532233903031	48.18721666442015	48.66204597145946	44.63894986367321
Ndufa5	111.58252582616662	108.41907319810579	119.96740159178763	81.33922924038463	80.59341524024133	89.77462496825048
Ndufa12	117.573123276196	120.7103781059153	123.51231354691764	84.14299107677195	101.04165968427935	85.69229056351564
Ndufs7	30.686777962077088	34.79303062264806	31.620297969038774	23.94135804762265	25.946055527896068	23.875764855204462
Ndufb5	53.82601720766061	62.43956190019833	62.53899059485132	45.92247609872421	46.34216176366628	45.09378586759408
Ndufs4	35.93930175449585	34.18120182179593	36.94820843606555	26.292022656562057	28.679026144002624	27.777453394131626
Dmac1	4.170370912267249	4.523313825965012	4.206641132625093	3.147549167700807	3.7434960900637217	3.248538966400941
Ndufa11	158.64407149880714	179.82430132345547	148.34015466511534	127.54641135945239	132.52309595125385	126.82244504070367
Ndufs5	81.9792581790088	80.80287612498684	82.39337840342381	68.49001833688789	64.08089150856671	63.88093528472483
Ndufb7	108.4259628747202	121.13718599846064	108.31541415949988	90.99499396677436	92.36705406910224	88.03354636661982
Ndufa9	59.92039253090187	64.50440718307404	60.9106475671044	51.41148767809217	49.4397782371021	48.16660346566947
Ndufa13	207.6359132063612	232.40493359046906	224.19205463477743	174.48786367402948	182.98451371584	184.32899809458698
ND4	2096.914262521653	1907.7634723928786	2148.363216569493	1703.797690371032	1691.4420315003028	1649.6802049748817
Ndufa2	93.69809766970057	104.65906701615532	96.43541908357157	78.49345243334852	86.56607786440902	77.38305928508231
Ndufb1	62.03693542801115	61.59477863472166	64.58810518551103	54.16732257012124	47.01332596358774	54.61581209340521
ND4L	2115.493460463036	1835.3208127079674	2304.4357522608	1758.682182861223	1700.1133307190084	1724.8431330696194
Ndufa4	128.94826612173125	126.77138033695424	126.4351478372348	108.11734299518761	103.43073417160018	111.01470279343475
Ndufa10	17.442826657390057	18.29647235237361	17.594333145612804	15.58851311100227	15.146641379059352	14.423052023561748
Ndufs1	35.25933431870456	35.97573156908553	39.558021750697264	29.68032764986149	30.591925992119815	34.16604607178169
Ndufb8	159.73963091430124	163.65389513686668	149.860057822937	133.49987109740033	138.38089066277885	132.06505152690707
ND3	1826.0806273116839	1654.1740692880276	2097.292000192131	1456.4326139653774	1544.2976825266137	1782.6551665989298
Ndufs6l1	70.3996108496605	72.1947516518274	72.3498113826409	58.01880828125029	68.32738861242875	57.99706863781468
Ndufv1	59.675715757402344	57.894646275847286	55.0311333267163	49.55163204477539	50.13235067574472	48.4475279151614
ND5	1150.1533446565668	1034.9813843010932	1167.8188763830397	950.6158239060312	962.1177066545184	971.7697229418928
Ndufa10l1	5.7626908392838825	5.934744508959096	6.357674850471412	5.693168134706641	5.078981851652308	4.761833166017069
Foxred1	4.4506175123183676	4.128942716741605	3.850961771003607	3.83864893068444	3.39671418933976	3.498323719435484
Ndufs3	39.64307983703118	44.45869944961411	41.663719737304355	36.365471877752576	37.789495568753885	35.90408578100823
Ndufab1	13.824391489693783	13.24261544452199	13.367833363877606	12.087234504291995	12.549729431095592	11.632224426109351
Ndufa3	58.069639494268074	59.620526210315745	54.349410984192886	52.78138012176174	57.163571893088	46.031373731734256
Ndufs2	63.913135251887425	64.73505049701726	62.855285183988784	60.83478537633285	57.94433293338525	54.966608304727146
Ndufa7	152.36635864859787	161.25709813184568	146.55454753435876	143.19547549973043	141.15264414998268	139.44249217316894
ND2	1564.722386406434	1463.0394724533644	1582.8480638925691	1406.6411948191185	1485.3721932370022	1414.8975871600765
Ndufb10	104.21190073230811	121.36800456487607	101.60927851421613	101.05847032107772	104.78474689743284	102.80911334784236
Ndufb2	56.42359119563996	60.39409868324505	60.63795311048833	58.0983940225241	57.34285461384029	54.43883363954716
LOC103691697	0.6688762705987316	0.265643597461602	0.2718097299360794	0.13526191981707708	0.1764131348067871	0.7194204196483455
Ndufb9	108.65301344505015	107.74616152211928	105.23285582091471	101.46414977789654	110.62929174931088	102.93481154686036
Ndufb11	68.13414670534937	67.75929621599624	67.26378133962348	61.92605684229603	73.67694680817166	63.61246182372496
Ndufa1	102.67990299643428	109.69236284145313	110.65373699597791	106.69395794707597	110.26141995945903	103.36801722217932
Ndufa6	59.08105091232432	66.29939850310036	64.06954665439137	63.30335868974885	67.85575589494252	58.78887553794058
Ndufa8	77.65653386551271	78.95306911198041	75.66017705220723	79.2441560328333	76.26717414521993	79.0270473305678
Ndufs8	26.95405122874123	27.7724215852376	26.106876374256768	28.45950553491073	30.181839102300735	27.46755217913045
Ndufv3	44.042105133165606	46.3607726260648	42.17483494308968	47.69567422557636	47.5237835422401	48.04686793742643
Ndufv2	67.62033178840005	66.78008852010827	71.46046423408583	75.44474843336421	76.95546896385355	72.662937334913
ND1	2110.9814629510843	2006.9445354638415	1947.8886384346852	2315.091718020826	2329.377834351794	2133.868357149153
LOC691675	0.017541597572684302	0.0116110520991983	0.050492382347676404	0.0768583022556104	0.0289157308520817	0.023583923910561203
Ndufb11b	0.1443793979585066	0.035837597637731304	0.183347267731273	0.2007278594007996	0.1249481016362095	0.1637819334808233
Dmac2	10.592678147070124	10.232505221071376	9.741813968314498	13.005480410524918	13.241531774792389	10.865761811399812
