# Supplementary material for: Peptide-based Self-adaptive Implant Coating Sequentially Regulates Bone Regeneration to Enhance Interfacial Osseointegration
Source: Research Square preprint supplement (doi:10.21203/rs.3.rs-5132912/v1), 2024-10-01
Supplement: Supplementary file 213 [file 9_presynaptic active zone cytoplasmic component(GO_0098831).heatmap-data.xls]

id	S1	S2	S3	C1	C2	C3
Gucy1b1	11.345955291478147	11.325871946604405	11.851364493653632	1.9876623118882348	2.092289570738124	2.338878439248699
Unc13c	0.0708855647776048	0.0461112614005041	0.0471815981152593	0.0049429971038758	0.0048351173228246	0.0024647322922684
Bsn	0.0742217504087364	0.1002221345905536	0.0799275061670227	0.031519571080187804	0.0176180971304126	0.0269427576154272
Erc2	0.1174231605337379	0.11343526930205919	0.1644301361133218	0.0320886818102434	0.0188330154829923	0.044801069889138505
Nr3c2	1.5569444497249565	1.405316015400924	1.5401054382267754	0.6364778310410929	0.9983492735213733	0.9201765692378628
Rims2	0.51308268514254	0.5029224754459763	0.5301229506388182	0.3289315312176832	0.3800568332352029	0.46452618633362297
Rimbp2	0.0175937335605164	1e-08	1e-08	1e-08	1e-08	1e-08
Ctnnb1	135.830119183919	136.47935836909826	134.6451997455789	111.614462014057	110.91119949315588	108.06076956121873
Iqsec2	4.068933617663691	4.234547759603784	3.946935980314105	3.5264160717187965	3.7623100284480584	3.203245464797357
Erc1	5.528357789608389	5.829793435518168	6.112745072027752	5.528041054709454	5.440720114498781	5.43644562093333
Ppfia3	0.2024623675876952	0.2304368196030309	0.1755851210535987	0.2396632395736991	0.1562884258872224	0.1842342747075214
Unc13a	4.290843315905736	4.419248061724235	4.597141461106757	4.548408293415599	4.63097709456875	4.778143056040919
Ctnnd1	67.39284111777218	64.86083828260595	66.28831835760266	70.76212423515514	67.09798133611336	70.56825412875072
Ctbp2	5.176059603725421	5.150839281425741	5.3579754606876895	5.3880931642556344	5.971940438958073	5.55112521395702
Pclo	0.0082371403735396	0.003505047892409	0.0071728040207761	0.002379630121024	0.0151299647825918	0.0094924122841484
Rims1	0.0014080868093003	0.0013980510020428	0.0143049340094808	0.0128135341638085	0.0153191861119832	0.0042594827958856
Ctbp1	55.74426052689476	55.195706598726986	51.940575141090484	68.08895272415559	69.4372912257928	66.07836327077295
Unc13b	0.07863816496228329	0.1225011913800968	0.0909093420056481	0.1288643970554585	0.10861923971634099	0.1681584545694084
Ctnna2	1e-08	1e-08	0.0056480870637105	0.0224854366613032	0.0989760986888513	0.0056059655870401995
