# Supplementary material for: Peptide-based Self-adaptive Implant Coating Sequentially Regulates Bone Regeneration to Enhance Interfacial Osseointegration
Source: Research Square preprint supplement (doi:10.21203/rs.3.rs-5132912/v1), 2024-10-01
Supplement: Supplementary file 217 [file 10_nucleotide binding(GO_0000166).heatmap-data.xls]

id	S1	S2	S3	C1	C2	C3
Sult1a1	56.96358574766197	55.940946808763286	55.76065008062465	2.217519238074885	0.8830055400267588	1.3699209437412396
Nt5c1b	1.7730067935291012	1.8512278220421927	2.4403785824695823	0.1156587444812688	1e-08	0.1268760550711348
Mab21l1	3.1802127713755755	3.796924943588195	3.3214238052858565	0.5910209824768771	0.5977194164452555	0.859127950036646
Abo	1.5224574478298032	2.1480722680016853	1.3160465643097987	0.5941453871322033	0.6868470492223642	0.7541132820425551
Nampt	24.159592972956005	21.629550576569414	25.288618857425448	13.082029622154772	11.436986025752057	14.11404487105717
Pole	1.7805606873116353	1.629654774507568	1.8089059599437602	0.9296343663966137	1.027816305339133	1.0250191734391854
Gpsm2	2.2291425951051345	2.0806634928771204	2.395079953250205	1.5787793686631852	1.0972819928003936	1.5174835457147304
Nt5e	25.29530965206086	24.973599226573263	27.119511844004556	16.232003548600492	15.140206986351915	17.970188200286586
Pold1	2.8086191418188577	2.846697086673568	2.582528193363021	1.965531600677972	1.575402637110034	1.8290330665107208
Exosc10	18.11260205167091	16.555536983591608	16.77240529706486	11.686654692711722	11.372326159410008	12.017191363597057
Tap1	16.416427213721366	16.782433055970213	15.275970261917498	11.733680153952525	11.503839251054467	11.1664017978954
Vdac1	142.1875774596316	137.46900865363858	143.6768531659234	103.94960338755803	99.99143885321256	100.84264498050564
Dhdh	1.4412026091144887	1.696937050856449	2.064820629256912	1.1209375693112436	1.2426697545422298	1.3880175526981915
Slc27a6	1.534506773935095	1.2498437517981393	1.5853576691175104	0.9993097699183444	1.0289473877724513	1.1749058371805359
Blvra	31.001948030894972	31.509962801331955	32.14813660653285	22.77212893415736	25.506568581265036	21.321613267112824
Dhrs11	3.936315501831796	3.803440903343536	3.355465033529377	2.9431096286376883	2.7893780440668063	2.448406468648356
Pola1	1.981167705745452	1.6946869052221216	1.897694701422059	1.3207810712884873	1.274729198333559	1.6420625425683097
Etfb	75.98991055506724	81.73799489916598	84.57920185757708	63.568433420239444	61.373517809161214	59.334540469544976
Itpa	43.156755036326864	43.02786688634485	47.84620128092722	36.09402374070644	32.31958476319005	37.58819736765297
Abo2	1e-08	0.0124851175360338	1e-08	1e-08	1e-08	1e-08
Hprt1	48.07051853626996	47.905152250449504	54.65583010633114	38.59497883418675	40.33690936256189	41.43484345623558
Tap2	19.14949172666644	20.68948547657092	19.50391597933748	14.90166968716826	16.62293754988867	15.992628976800187
Rev3l	1.6271835499023464	1.3139079390464972	1.7016612914471416	1.1711803048315925	1.232570658321105	1.3732608462633884
Nt5m	1.0656018625070491	0.9874731840697033	0.8605007792645208	0.8067016655487899	0.7782860228794237	0.8816345300167815
Mrpl39	11.41738653648417	11.60153941444814	11.034860646987937	9.256215758689903	9.094893594875018	11.242975288975517
Hint1	177.20081000095402	170.29234817767679	163.76489004555313	150.42400428411963	151.7605253578311	149.1109087602392
Polr2d	25.44556876189581	24.43968783270383	21.35111793406166	23.209338107623395	17.943213728545004	22.286910000397686
Prtfdc1	21.15742646308606	23.91589944058534	20.312273603185012	17.689156267096987	21.73541326246861	19.291791804851286
Nt5c3b	6.709420563466075	6.784963378654747	6.374437143261063	5.823816114354234	6.951920218371808	5.297770920180301
Dlat	19.37391606766347	18.440738956121432	18.1107067201837	16.562046308124813	17.181617990497617	17.158985505977075
Vdac3	82.9660650893512	81.30840011837468	88.36137165489005	75.70966660381448	75.53448008773042	78.92031697529669
Impdh1	31.245302576180173	35.696280550489114	31.21937523191555	29.61687878272299	32.38757376350276	28.290900664914066
Nudt16	7.030350255010418	7.073312635759046	6.818485644786067	5.990078505557211	6.601035532758473	6.95667575270407
Aplf	2.93303672534157	2.498508687647942	3.168463813791259	2.498872139937314	2.8507958413998353	2.9007408173940754
Naxe	32.51640000866364	34.17043073661825	29.20064904024528	31.03414540208412	32.23534767138607	28.906273597990857
Rmi1	9.364468824174903	9.47448814145004	11.201625994523646	9.84655854126285	8.997765742744068	10.310261370473004
Chd1l	0.9948831875292057	0.9313470654401065	1.1839874875366914	0.8574436051849648	0.9792993386280728	1.22770540520159
Fhit	0.2488475410928147	0.4866607542270273	0.4826353900966913	0.5260999159222811	0.3654532818429773	0.3041498806395473
Vdac2	71.60172641253247	70.35320888080788	72.95921132534906	69.78542735010603	69.98233083285102	73.26645030135121
Impdh2	99.99087271773728	106.7775918516536	94.91709307922054	102.359336916104	99.06562796120707	97.98400478814075
Slc27a1	8.334011237673497	9.403783006140713	7.506921672824202	9.205406543906753	8.308183968340277	8.227582508118743
Hint3	12.135087567912485	11.21597035435533	14.157464094483135	12.544274065129366	11.758210423879875	14.027011856557623
Hdgf	54.2480518713884	54.70616124159113	55.95007261777664	57.51775776765182	56.98613014948255	55.78161087005011
Gdpgp1	1.3030966605140923	1.2496302336482286	1.5821514871849773	1.401131836094426	1.3265438298978012	1.6280387403844114
LOC685311	5.136545008058195	3.856048593073572	3.351600815878481	4.264686362380754	4.378125734371614	4.421437944297122
Orc4	5.1655790522476295	4.552762880257753	6.269116273278187	5.624752695462612	5.376233655101888	6.214349947055231
Amfr	70.31586825151658	71.7547721202514	71.88189491516474	80.84883007044216	80.45093607241826	73.77350977631994
Chfr	10.61038658197387	9.745373414120182	9.54569850775517	11.327565626091303	10.90162837846887	11.413140348092242
Nt5c3a	5.695927286505264	5.78593871456991	6.174157798348043	6.610474979276919	6.453192115432272	6.923971815109295
Hint2	21.378971732918913	23.90995933153324	25.243575294557584	25.980656006534286	27.927069213868304	26.03149830800828
Crcp	7.736298110047757	8.613119665992052	7.736410232387813	9.276510860894712	9.029131671006967	9.159500590001715
Slc27a4	15.093224453187615	15.046972639136142	13.458968033414617	17.946260893108725	17.00481313109909	15.530535016906715
Vps11	23.43449497904056	24.990714647279745	22.78712464223948	29.13885810819201	27.15884459474719	26.43015891069577
Dxo	3.4740863241766973	2.2253712396479037	1.9842660993508103	2.865192959735773	3.3568590846703246	3.422354402956961
H1f4	0.1513952761457487	0.27056921385315347	0.12304430777157549	0.5816954098910874	0.2395789595457902	0.1831900216000342
Gcnt1	0.1817983179907489	0.1684690792023161	0.15596248878263688	0.2369218264446534	0.2077768058609881	0.1873887120780422
Gfod2	0.9252084714593817	1.0434515347195508	1.255659610408047	1.0842093911246804	1.40545903700556	1.5381341444020107
Nt5c1a	1e-08	1e-08	1e-08	0.0031811630743585	1e-08	1e-08
LOC108348040	1e-08	1e-08	1e-08	0.028467736560787903	1e-08	1e-08
P2rx1	1e-08	1e-08	1e-08	1e-08	0.0353492059518505	1e-08
LOC684427	1e-08	1e-08	1e-08	1e-08	0.0465583446284314	1e-08
Gfod1	1.0801028376512025	1.063133094879849	1.0814861140233092	1.4508960341020165	1.6193389161812963	1.5002781217402041
