# Supplementary material for: Peptide-based Self-adaptive Implant Coating Sequentially Regulates Bone Regeneration to Enhance Interfacial Osseointegration
Source: Research Square preprint supplement (doi:10.21203/rs.3.rs-5132912/v1), 2024-10-01
Supplement: Supplementary file 221 [file 1_ferric iron binding(GO_0008199).heatmap-data.xls]

id	S1	S2	S3	C1	C2	C3
Tf	86.09698184087955	92.56079599295572	87.63550951687795	6.246479986657218	6.273634034133513	5.948107220563589
Fth1	14914.332884871563	16299.8905266539	14676.117161457576	3809.538481670412	3841.849768844073	3548.319284142597
Rrm2	19.7137636759507	18.402453444244202	20.762550454704872	6.568695249164418	6.089042115928487	6.806015469998706
LOC100359539	4.682393189080845	5.241542490400262	4.738278951018323	1.921621225117444	1.7434733427163203	1.5553038075937768
RGD1566189	1.9753509337264838	1.5483726218782732	2.2180389320689504	0.7621288608134542	1.028269705635609	0.7076242150719215
RGD1560687	4.0331033527530105	3.539335917888125	4.440952664955635	1.6837878280306038	2.0330643431098663	1.9415457226869564
LOC100362384	20.077730061775775	23.26120557331533	17.044363794397228	8.797880260361861	9.916531973630939	10.034376365217927
Ftl1l1	1.711678537122537	2.188722777447865	1.5281481944818132	0.8915730365927382	0.8721146198745168	0.8368285697442966
Ripor2	0.2712954628282452	0.28880033825378987	0.2415176828347693	0.1272574056641884	0.1604409330391988	0.11844817011086549
LOC100359668	7.289582907712901	7.340289139083634	5.462307132907586	3.580748974142252	3.630431897740547	3.4927429022024
LOC100360087	17.95211423563811	19.411948569571518	14.621764061855565	9.388767867891238	9.05630613519156	10.091281883572258
Ftl1	3550.724809984261	3383.20598950582	2984.75692629994	1822.522812197148	1926.2764799390402	1863.586854963693
LOC102549852	0.5328432083166267	0.7935681953283301	0.3721614197858977	0.3704007672627976	0.329378945556976	0.1343221750925708
LOC120102993	1.9233680146810503	1.187085679106676	1.0826142457717496	0.8146894712143821	1.1825101599809504	0.7600408228550268
Th	0.266047421519046	0.0880504125855871	0.1415766618768182	0.0256194407518701	0.1754220498359625	0.0510984901395494
LOC365803	0.07353485355650649	0.2920429601907053	1e-08	1e-08	1e-08	0.1853708550714632
Fxn	16.00280175919318	21.53807620892053	17.762884273407238	17.678850125390944	16.970600388198342	15.897255201049779
RGD1563378	0.0273736743065839	1e-08	1e-08	1e-08	0.0270738161480936	1e-08
Acp5	2.9072697398909013	2.678014775474245	2.6840258228982177	3.2190061327055663	3.7828755665186478	3.0429896471339015
