# Supplementary material for: Peptide-based Self-adaptive Implant Coating Sequentially Regulates Bone Regeneration to Enhance Interfacial Osseointegration
Source: Research Square preprint supplement (doi:10.21203/rs.3.rs-5132912/v1), 2024-10-01
Supplement: Supplementary file 225 [file 2_glutathione transferase activity(GO_0004364).heatmap-data.xls]

id	S1	S2	S3	C1	C2	C3
Gstm3	0.0081228983791406	0.0080650039932596	0.0082522090443715	1e-08	1e-08	1e-08
Gsta1	306.03792153875213	305.6026456078112	307.3784159785956	25.678036869004604	24.28845391676968	26.45302789980771
Gsta5	2.0317116515686466	1.2452043262262593	2.064055070764603	1e-08	0.0248081056759544	1e-08
Gstp1	500.321704418056	516.810635737434	494.17870100634735	106.72428525443492	104.0905111195828	101.34004741539319
Gsta2	0.5231234668357057	0.6287413149745243	0.8671046223774811	0.1113551636633611	0.1633872819867511	0.1110500790474626
Gstm1	45.53356173657048	47.60950914159571	41.930834386865364	17.383676510575278	16.833479050644716	16.562118897759337
Gstt2	8.915766994142976	10.588618807247506	9.458328754669271	3.640612021513944	4.239471827179759	4.166588951125471
Alox5ap	5.281481228426653	5.871091848572376	6.341114815701951	2.989475880226093	2.19942170049401	2.3442586714288267
Mgst2	75.23429643871205	72.3663347352602	79.29501471889036	40.535484855496456	38.940315416410634	40.39656830118608
Ptges	30.57020541126863	32.15208900198828	26.70237881252432	15.407237598805004	16.845132203721768	15.917176573469645
Gstt3	2.7164583350990688	2.5384444997557747	2.2874538954129866	1.3806672833352938	1.5660452938484712	1.3329414829531325
Gstm2	190.81332753780092	209.34083083854833	197.98897462861916	134.8681416964187	122.22953430163864	122.6735895171186
Gstk1	15.442317156866364	17.245510632799856	15.366339812473305	10.889714702697928	11.513611450671727	9.475777362165873
Gstm5	57.71216179150389	55.46675787139734	56.18557516785085	40.29845609223954	41.1352242235911	36.660305605650834
Ltc4s	1e-08	1e-08	0.0656348264102128	1e-08	1e-08	1e-08
Gsta3	1e-08	0.0320292436380814	1e-08	1e-08	1e-08	1e-08
Gsta4	15.901209083811368	14.156232477308597	14.978628608764915	13.38656579447718	10.072620361871397	12.276297476840226
Lancl1	9.291688866654471	8.800455211241921	8.688029971478183	7.277909399703722	7.2203111904088155	8.327664109083893
Gsta6	0.4437573084919873	0.523725548151401	0.5699065638758779	0.465620481028729	0.4223341536432639	0.43057426993826997
Gstm6	0.2286746508052204	0.2889661248945785	0.4646299702419197	0.27325519392370007	0.3289740899733238	0.1257722567701727
Gstm7	7.089756423830128	6.436418892801024	5.610881052551473	6.019994090593286	5.578682051036465	4.956837872817468
Mgst1	51.87658773490025	57.53424392368	55.479048761836644	49.45046317094978	46.5257799760386	48.6260027746506
Gsto1	37.64005338831383	38.39298650302365	42.06318219626341	36.79711499758453	36.0373128192774	35.43851973402807
Hpgds	0.0152861427470594	0.0455315609819595	0.0155294872203634	0.027048025859160503	0.0151186945178185	0.0192670894425471
Gstm4	8.724759852552545	10.708853470305307	10.236238399082136	10.129926645841307	8.572564630310662	9.270908699893225
Gstt1	2.353354628552995	2.6142899875421732	2.1066637354923627	2.5550451447686897	2.2035652138620483	2.129854389266712
Gstz1	8.609145216048631	10.084191578734918	9.819196632763465	10.927590815553906	9.972442719108361	9.795503118172581
RGD1561381	1e-08	0.11375544946944399	0.0387986555070048	0.0386151036090687	0.1888616415975886	0.0385093081374265
Gsto2	0.409320566576471	0.2477124366352509	0.4079159635853361	0.4927016489039893	0.3007358843516426	0.4795593302362438
Mgst3	6.742804274128404	6.1965325140794745	5.989894209068197	7.895891601215947	8.747170253317192	8.348611823422488
