# Supplementary material for: Peptide-based Self-adaptive Implant Coating Sequentially Regulates Bone Regeneration to Enhance Interfacial Osseointegration
Source: Research Square preprint supplement (doi:10.21203/rs.3.rs-5132912/v1), 2024-10-01
Supplement: Supplementary file 229 [file 3_glutathione binding(GO_0043295).heatmap-data.xls]

id	S1	S2	S3	C1	C2	C3
Gstm3	0.0081228983791406	0.0080650039932596	0.0082522090443715	1e-08	1e-08	1e-08
Gsta1	306.03792153875213	305.6026456078112	307.3784159785956	25.678036869004604	24.28845391676968	26.45302789980771
Gsta5	2.0317116515686466	1.2452043262262593	2.064055070764603	1e-08	0.0248081056759544	1e-08
Gsta2	0.5231234668357057	0.6287413149745243	0.8671046223774811	0.1113551636633611	0.1633872819867511	0.1110500790474626
Gstm1	45.53356173657048	47.60950914159571	41.930834386865364	17.383676510575278	16.833479050644716	16.562118897759337
Mgst2	75.23429643871205	72.3663347352602	79.29501471889036	40.535484855496456	38.940315416410634	40.39656830118608
Ptges	30.57020541126863	32.15208900198828	26.70237881252432	15.407237598805004	16.845132203721768	15.917176573469645
Gsr	31.639221044314738	32.404927902106515	31.349725024476232	17.13424760016886	18.089473346522333	16.880811046501314
Gss	34.939512042608754	37.94958637422828	36.38249310677115	22.300517309841652	21.59494495130185	23.317919882185667
Gstm2	190.81332753780092	209.34083083854833	197.98897462861916	134.8681416964187	122.22953430163864	122.6735895171186
Gstm5	57.71216179150389	55.46675787139734	56.18557516785085	40.29845609223954	41.1352242235911	36.660305605650834
Ltc4s	1e-08	1e-08	0.0656348264102128	1e-08	1e-08	1e-08
Mmachc	4.722993060795815	4.406714882412333	4.401901545215932	4.189204688889448	3.638991981957812	3.69936161557932
Lancl1	9.291688866654471	8.800455211241921	8.688029971478183	7.277909399703722	7.2203111904088155	8.327664109083893
Gstm6	0.2286746508052204	0.2889661248945785	0.4646299702419197	0.27325519392370007	0.3289740899733238	0.1257722567701727
Gstm7	7.089756423830128	6.436418892801024	5.610881052551473	6.019994090593286	5.578682051036465	4.956837872817468
Mgst1	51.87658773490025	57.53424392368	55.479048761836644	49.45046317094978	46.5257799760386	48.6260027746506
Gstm4	8.724759852552545	10.708853470305307	10.236238399082136	10.129926645841307	8.572564630310662	9.270908699893225
Ptges2	4.85380334804146	6.36043542691024	5.5901179658771705	5.926774553560205	6.404663833785938	6.821647108629848
