# Supplementary material for: Peptide-based Self-adaptive Implant Coating Sequentially Regulates Bone Regeneration to Enhance Interfacial Osseointegration
Source: Research Square preprint supplement (doi:10.21203/rs.3.rs-5132912/v1), 2024-10-01
Supplement: Supplementary file 233 [file 4_glutathione peroxidase activity(GO_0004602).heatmap-data.xls]

id	S1	S2	S3	C1	C2	C3
Gstp1	500.321704418056	516.810635737434	494.17870100634735	106.72428525443492	104.0905111195828	101.34004741539319
Gsta2	0.5231234668357057	0.6287413149745243	0.8671046223774811	0.1113551636633611	0.1633872819867511	0.1110500790474626
Gstt2	8.915766994142976	10.588618807247506	9.458328754669271	3.640612021513944	4.239471827179759	4.166588951125471
Alox5ap	5.281481228426653	5.871091848572376	6.341114815701951	2.989475880226093	2.19942170049401	2.3442586714288267
Mgst2	75.23429643871205	72.3663347352602	79.29501471889036	40.535484855496456	38.940315416410634	40.39656830118608
Ptges	30.57020541126863	32.15208900198828	26.70237881252432	15.407237598805004	16.845132203721768	15.917176573469645
Clic2	5.370691970963792	6.791621062768291	6.248811743840832	3.1554893452268926	3.44553083381256	4.043328769226196
Gstm2	190.81332753780092	209.34083083854833	197.98897462861916	134.8681416964187	122.22953430163864	122.6735895171186
Gstk1	15.442317156866364	17.245510632799856	15.366339812473305	10.889714702697928	11.513611450671727	9.475777362165873
Prdx6	342.2000642428137	344.81453130832546	324.40744103146716	224.36632498407567	228.27899569018072	223.64004969323528
Gpx3	480.7820620330932	521.9704307845308	477.1120587436126	335.53312908646967	342.96932226730803	316.388431135584
Gpx7	82.92397696710817	88.09566005442251	81.28563045439576	64.41220331393471	66.06536858506692	62.17014256706336
Ltc4s	1e-08	1e-08	0.0656348264102128	1e-08	1e-08	1e-08
Gpx5	1e-08	1e-08	0.0146588523000262	1e-08	1e-08	1e-08
Gpx8	233.5047025850172	235.9136426415244	246.2596062720879	198.85755109273953	191.47439534716656	210.67777059795762
Gstm7	7.089756423830128	6.436418892801024	5.610881052551473	6.019994090593286	5.578682051036465	4.956837872817468
Mgst1	51.87658773490025	57.53424392368	55.479048761836644	49.45046317094978	46.5257799760386	48.6260027746506
Gpx1	226.0359273551316	234.0095230293477	218.2146676686832	215.551149902574	222.8650269053347	203.70487721677742
Gstt1	2.353354628552995	2.6142899875421732	2.1066637354923627	2.5550451447686897	2.2035652138620483	2.129854389266712
Gpx2	0.3751005189139817	0.09310677233802679	0.5001568065358452	0.3792690482197647	0.3941785440670464	0.1891149790709264
RGD1561381	1e-08	0.11375544946944399	0.0387986555070048	0.0386151036090687	0.1888616415975886	0.0385093081374265
Gpx4	192.22729921086082	218.71419042199312	189.44756327563223	223.44568076604168	229.1803622570777	215.3213148716599
Mgst3	6.742804274128404	6.1965325140794745	5.989894209068197	7.895891601215947	8.747170253317192	8.348611823422488
