# Supplementary material for: Peptide-based Self-adaptive Implant Coating Sequentially Regulates Bone Regeneration to Enhance Interfacial Osseointegration
Source: Research Square preprint supplement (doi:10.21203/rs.3.rs-5132912/v1), 2024-10-01
Supplement: Supplementary file 237 [file 500_serine-type endopeptidase activity(GO_0004252).heatmap-data.xls]

id	S1	S2	S3	C1	C2	C3
Dpp4	0.12401969377418859	0.13260774765710098	0.1599154586449072	0.0144690015618186	0.014153218492003	0.0144293602287698
Corin	0.017986720512899103	0.028063388447517	0.0182730562832773	1e-08	0.0025413927800435	1e-08
Klk9	0.2294401226472393	0.18224386651435479	0.349638966603823	1e-08	0.022692686664826503	0.09254173420621879
Prss42	0.2724043065730409	0.062414498912438304	0.2554530388248817	0.0423740950223409	1e-08	1e-08
Pcsk7	10.388521618873257	10.462889125505196	9.967188345584313	6.079799683829568	6.7467769647699845	6.391991000122171
Pcsk6	1.7368521173878602	2.110549073070775	1.8382419444877847	1.1165993666922758	1.4101558316504867	1.197186379509924
Sec11c	65.85832726885134	64.72914146054019	65.98291362600442	46.18524904565019	41.23376669120589	45.03597003559247
F7	0.046980604494434704	0.0116614472471983	0.023864256244387903	1e-08	0.0116164992450897	1e-08
Pcsk2	0.2807311502823621	0.2787302909567463	0.3638761048203973	0.039151862882457304	0.18191252187404688	0.24402867767379868
Hpn	0.026825787520991403	0.0044391069581478995	0.0408792475243744	1e-08	0.0088439836850834	0.0045082737547591
Immp2l	2.7856729070817754	2.6011864830221154	3.655441022963891	1.8777535815782467	1.8531717060402044	2.8423529677624364
Rhbdd2	10.510105734468677	9.648320102590302	10.528777652735101	8.161266241156639	8.10373947331816	6.835697875053389
St14	1.8830768115066616	1.8258354783404607	1.942945538340847	1.242064872467531	1.585991816569126	1.5650159722050763
C1rl	3.0131521501235	2.7597015527599056	2.4472585687235666	2.2890512548356456	1.7609949580436608	2.372141328407521
Rhbdl3	0.2750206534018639	0.1942930471103452	0.1773107732506856	0.1390384975984339	0.1255421622524958	0.2079863466010664
Masp2	1e-08	0.0509230226144803	1e-08	1e-08	1e-08	1e-08
Tmprss2	1e-08	1e-08	0.0251623114794383	1e-08	1e-08	1e-08
Prss57	1e-08	1e-08	0.020029285782134	1e-08	1e-08	1e-08
Tpsab1	1e-08	1e-08	0.0196529186718488	1e-08	1e-08	1e-08
Tmprss11d	1e-08	1e-08	0.0137694205405512	1e-08	1e-08	1e-08
Gzmc	1.9752953370216226	2.3886614662389505	0.9261879968624053	1.1778636139899912	0.8515942761127634	1.455527920349363
Immp1l	7.300427579793423	7.0358322245627845	7.2208980128588465	5.325112195583337	5.20889260516532	6.670534672900704
Tysnd1	4.754052657779695	5.464977883364574	4.726874057949621	4.025126288434128	4.037417529175039	4.0651448116324795
Prss46	1e-08	1e-08	0.12378299566557299	1e-08	1e-08	0.0204766522343091
Ctrc	1e-08	0.053430595205344905	0.054670828668961405	1e-08	0.0266123308160238	0.027131560960459603
Sec11a	91.51098236780742	97.96261419350256	94.71468342490488	82.09607581847565	80.12840957752584	81.13375517262719
Masp1	12.852682456402917	12.88441080111812	12.974052265352775	11.122215899338705	11.302943885819701	10.865218591750041
Htra2	27.609641201752112	25.34984432409144	26.120502262948232	21.160291204868503	25.547827993382906	22.03684862343998
Tpp2	17.83789395326361	15.348324392377524	17.88166680200898	14.67406373180611	14.428434835258734	16.17079634025533
Prss55	1e-08	0.0033681271189614998	0.0034463080249775	1e-08	0.0033551450025932	1e-08
Ctrb1	0.1131846162389822	0.11237791387357439	0.2069755758977889	1e-08	0.1343337135455123	0.1826062420856938
Clpp	11.305969066204662	12.973053035412132	10.299528936655804	10.439048189377997	10.529272217352055	10.239784789930436
Prss8	1e-08	0.2342427929654615	1e-08	0.0542150417880947	0.0530318087275837	1e-08
Apeh	17.52047848743153	19.377130156643183	17.035251123249278	17.279150410723847	16.525112802018743	15.067721153309892
Prep	32.76394757461826	33.440250605987785	32.56536476895726	31.178833204669584	31.10542109552443	28.312699614682035
Prss38	1e-08	0.0212755371405898	0.0108846978797932	0.0108332036821821	0.0105967712299099	1e-08
Parl	23.644963708755213	24.31842057410686	24.764652309316624	21.21769231581445	23.550408857977963	23.959598299183412
Prss48	0.016546634476027302	0.0821434673387553	0.10086022054231869	0.1505745888529726	1e-08	1e-08
Tmprss6	0.029896751951003903	1e-08	0.0075931792595779	0.0151145037106203	0.0073923213377844	0.007536551933461
Furin	35.022464339769485	36.26288423523593	32.56353924609043	33.916017439035635	34.96866210833662	31.658982154811092
Fap	1.2894936957288263	1.606823310692903	1.547407977004522	1.3038239674582508	1.5321538020102623	1.5096883573027675
Pcsk4	0.0677904138349143	0.019230650073907302	0.1475776800266443	0.0195839429551105	0.1340956306353431	0.0683559829719555
Ctrl	0.0296719644175377	0.5302885248199649	0.09043294313662789	0.15000851900766068	0.2347753715849724	0.2393560485484157
Gzmk	0.9933040078823339	0.4531301430339912	0.8182027383790145	0.5700323442291106	1.0089750758592264	0.6496806860599854
Klk4	0.0187179701780198	1e-08	1e-08	0.0189259847332985	1e-08	1e-08
Htra1	608.3725464933302	644.1965260328998	603.662571770633	641.5855579983389	632.2389050967842	602.305328281967
Cfb	0.0739944463287346	0.027550155496505902	0.0375861978349109	0.037408381933785304	0.10977583336609839	1e-08
Prss53	0.2426411008855283	0.1175179179747652	0.3126389330556954	0.17353147290703738	0.2048636643697912	0.3162748254950853
Prepl	11.212514236350623	10.6818485801119	11.170011493592478	11.437533148804349	10.897923437436653	11.58739936567143
Rhbdd3	6.540228122436518	6.76954645479613	5.863210030945112	5.676237479013821	7.2657050014922095	7.024481685897402
Mmp2	617.7133433703117	647.1596844253282	604.0931237743388	670.6966692725189	657.9076942510458	624.0135343014572
Cela1	0.1925058606113422	0.021237098970507403	0.021730055360743402	0.0432544960661655	0.12693140467805408	0.1294079495404035
C1r	157.5512305930289	162.15787414186062	159.10744839517938	168.97073846783678	170.59206256164026	168.06631216370624
Tmprss5	0.0145925496349711	0.0126774772546385	0.018531063242695402	0.0184433949762134	0.0342776468572466	0.003678580964518
Lonp2	23.477485876450945	23.708760566324386	24.063657278463246	26.52915584328232	25.30492358861919	25.435996750775928
Tmprss9	0.0685530488685439	1e-08	0.0139288809984615	0.041588935369350204	0.054241683000812904	0.0207375011799691
Mbtps1	35.112334833147614	36.44971182230447	35.87701940959889	39.86578537108414	38.84378609615719	38.71098647975351
Prss36	0.2842420062282423	0.3506321515439881	0.4200246336043889	0.4049738727680805	0.3024259475382267	0.4472906209596325
Gzmm	1e-08	0.0180149199542925	0.0184330829611823	1e-08	0.07178190216276159	1e-08
Htra3	0.8731069024874815	0.9077747484377484	0.817272962551311	1.041049321700892	1.0753550144025965	0.736427821783904
Prss39	1e-08	1e-08	0.0047241184474357	0.0047017692375535	0.0045991542101532995	1e-08
Rhbdl2	0.017410465606761003	1e-08	1e-08	0.017603949733546002	0.0172197469986036	1e-08
LOC102553861	1e-08	1e-08	0.0962206508573721	0.0239413680376226	0.0468376946362019	0.1193788342260223
Dcbld1	2.1336199678444867	1.9755432735438103	1.9104999515834042	2.2175356874160115	2.365440495608692	2.246483332610395
Plg	1e-08	0.043263641745218503	0.008853583873516	0.0704935191280755	0.0172387603261692	0.0175751037395689
Rhbdl1	0.0367902828794205	0.1315010152288166	0.09717747512941549	0.059518612952449	0.19649122895237	0.1335499687363829
Htra4	0.020972746603361403	1e-08	1e-08	0.06361743614071559	1e-08	0.0105738651130223
Gzma	0.026724862850107303	1e-08	0.0271503036956467	0.027021858800928403	0.13216051969582948	1e-08
Pcsk5	0.3784190451058577	0.2862643325613611	0.2929091145886517	0.4513006356945611	0.3016125442455344	0.441677898484054
Tpp1	51.177680395025334	50.182179392860654	49.09795100033184	65.17694097664995	64.12574060135296	60.407626187460394
Tmprss7	1e-08	1e-08	1e-08	0.0045472764838789	1e-08	1e-08
Tmprss11f	1e-08	1e-08	1e-08	1e-08	1e-08	0.0091583394381298
F12	1e-08	1e-08	1e-08	0.0114006566845822	1e-08	1e-08
Prtn3	1e-08	1e-08	1e-08	1e-08	0.0148974923906494	1e-08
Prss50	1e-08	1e-08	1e-08	1e-08	0.0165154136093801	1e-08
Mcpt10	1e-08	1e-08	1e-08	1e-08	0.0234188523181009	1e-08
Gzmbl1	1e-08	1e-08	1e-08	0.0342019500537466	1e-08	1e-08
Tmprss12	0.0893999762224194	0.0126804077833612	1e-08	0.051653425399401605	0.1136837105733058	0.10302380652731159
Ctsh	141.80024708361154	149.3542005369407	141.7903761932064	193.65934066058261	193.2524120534203	189.34630624229
Prss56	1e-08	1e-08	1e-08	0.0143533421568481	0.0035100283330487	1e-08
Klk14	0.1248686698560057	0.2789520435045036	0.1268564910248808	0.5050253608265819	0.2933144490533413	0.2990372756947164
Hp	0.4549699777355782	0.7463319938206914	1.0249065855484496	1.1600658129925758	1.506475246836906	1.0771021834678702
Rhbdd1	5.554225151274957	5.785554081249182	5.192957772020787	8.062198683360764	8.22208267789154	7.991197104156782
Prss23	30.379992219910143	29.59956554626061	29.43688599405867	43.80026035357915	45.183148032363185	45.21089009193536
C2	24.39656808004549	27.138797711995945	25.17293072585436	38.74381059776568	39.562015124180604	38.096698524525564
Proc	0.012293997344338	1e-08	0.0124897089690254	0.07458367989913589	0.060796589226638005	0.0123965649559732
Prss12	0.8432819414295172	1.3076489060219676	1.0781024285699954	1.820271329387076	1.5087769660681312	1.681526465684668
LOC691670	1e-08	1e-08	1e-08	0.0320071731519019	1e-08	0.0319194817181877
Cfd	4.1068682464273785	4.2182041051588115	3.4528938206712474	6.042615495572222	6.639073729365952	6.483012713183508
Tmprss11a	1e-08	1e-08	1e-08	0.0370609357548338	0.0090630294729493	0.07391878661054009
Plau	9.473322945563659	8.981481621054032	7.742722399575817	15.062375672689967	13.898333160536087	15.441781742717108
Cfi	0.0706812626125226	0.046785000030550805	0.0119677514001706	0.11911124401802309	0.209720985982994	0.1187849097273854
Lonp1	37.622593734955025	38.47507901973393	37.47335304167433	71.1199165335261	67.92097642886017	67.51885495595515
C1s	17.7701888461701	17.05618007113776	18.177958523694002	32.36200441776637	31.89126581437049	32.57546762002101
Plat	21.806936237585784	18.156365067102666	20.347126920567145	37.07351140002756	38.67407411982171	40.05449126830858
Mmp8	0.07932402884487459	0.0098448414448709	0.0100733601735104	0.15038542480918748	0.19613771785679218	0.15997163375346368
Pcsk1	0.1595440978431694	0.1024986356020093	0.1001106648753871	0.2894218967013439	0.3248749529780161	0.2980921989115896
Ctsc	1.0743364585539776	1.2135409687326086	1.4038438166894252	3.491038079927879	3.7420869298083455	4.019198300562119
Cd5l	0.2891996390100164	0.1555333165519456	0.2325944344643855	0.7797694320905086	0.8342590238763713	0.9355897774711165
Gzmb	0.4491803280931319	0.5734014122037019	0.2281654862878064	1.4760593470079004	2.189566568196434	2.054351050203907
Mmp13	1.6744013977924277	1.6895728580767801	1.6825669427480516	5.106630951921818	5.886211722543447	5.991881041482903
Pcsk9	0.0497292441363233	0.0070535526013656	0.007217279791282	0.2657756617827897	0.2810542232385357	0.1934130465498111
Klk6	1e-08	0.019477605269554003	0.019929720202438203	0.3173668108301262	0.2522327773034904	0.3956216312958486
Mmp9	0.4997413287227106	0.5434347057568754	0.4109926970792275	5.077011613958169	5.405555238533193	4.535195543410697
Hgfac	1e-08	1e-08	1e-08	0.0117244752485909	0.0114685909589133	0.0116923532150854
