# Supplementary material for: Peptide-based Self-adaptive Implant Coating Sequentially Regulates Bone Regeneration to Enhance Interfacial Osseointegration
Source: Research Square preprint supplement (doi:10.21203/rs.3.rs-5132912/v1), 2024-10-01
Supplement: Supplementary file 241 [file 501_extracellular matrix structural constituent(GO_0005201).heatmap-data.xls]

id	S1	S2	S3	C1	C2	C3
Lama5	8.215234430238823	8.156681865014596	7.316325823843252	2.86271479436949	2.6014032072702613	2.5444677413585723
Scara3	69.20837571616136	72.42565151020521	71.25571134176595	35.740925514050716	33.9357018324775	34.960433525149
Col11a1	286.6589469035739	272.4645788976701	290.4201070496098	137.30029263542065	136.51216046354577	147.40066171407025
Lamc1	157.60156004804884	154.791120261757	151.54498917594887	95.03490093697488	93.00678525603595	93.90842344646815
Col4a4	0.0822160503652607	0.0816300707303881	1e-08	1e-08	1e-08	1e-08
Dpt	0.8360352929961165	0.3376582863425749	0.6190137079154698	0.3008788363255988	0.2943122114842135	0.314342814664571
Col5a3	10.855264701134438	10.278281073127564	11.147943231127456	8.35824635993656	7.376094417386638	8.1428850744571
Colq	0.028659196183968803	0.0151759690028898	0.0077641220678908995	0.0038637004764984	0.0037793761450981	0.011559324860907499
Col10a1	0.0076877436445438	0.076329417436207	0.0468607117162526	1e-08	0.0304140909325986	1e-08
Col17a1	0.10599363901765989	0.1428232529469812	0.0999894849117375	0.10717155677113249	0.07113638154978709	0.09160965928615619
Col19a1	1e-08	1e-08	0.0065072670462604995	1e-08	1e-08	1e-08
Lama2	1.9611471426420504	1.5971164996247664	1.5844418522641408	1.3937529388782495	1.4020793918819638	1.4467168127390977
Col9a3	0.0624755235229422	0.062030240845255304	1e-08	0.009024268589379	0.0088273158115721	0.0359981477236403
Pxdn	33.86916431979022	35.23028009004591	32.24640424449961	29.102543475499402	27.685217124172222	28.33049614331077
Col8a1	205.20255149085168	192.13079881767	204.88908264996545	168.37986747405037	164.22181312922814	180.115879950907
Col5a1	233.7657514937928	228.37470175507042	218.87007335935377	194.7483148572744	196.07963204033481	195.93188714483017
Col4a3	0.0574574708716212	0.025671584546610702	0.0233488672815753	0.0087144087033326	0.0113656214137835	0.0521431508897937
Fbln1	6.26582414480093	6.235718075376501	5.695511481362554	5.4833193996133565	6.044975093038138	5.653036254686294
Col28a1	1e-08	0.0057550791530848	1e-08	1e-08	0.0057328967363772	1e-08
Umodl1	0.0049298912461368	0.0097894988571108	0.0300501789123585	0.0049846775073126	0.0146276441774522	0.029826074766026802
Lamb1	89.09795448613589	84.54803186323126	84.48711854021862	91.22193627713256	88.0178510407427	88.17582432548326
Col4a5	8.953675995535795	8.098934749026652	9.352546697080545	8.754322130013641	8.716558004787174	10.46404735196128
Col25a1	0.020279899560304102	0.046023663474321304	0.0088297519115415	0.0497985034099577	0.0171923572297327	0.0321342830083505
Col4a1	280.8203016478587	277.11071736245475	271.15163799988665	306.4159035643247	301.7004711322021	304.2046074555721
Col5a2	459.9581056634681	449.76232777197976	464.3959175308044	509.5327520704776	504.947784697565	527.2200476771061
Col9a1	0.0058653108732214	1e-08	1e-08	0.023721940183425903	1e-08	1e-08
Lamb2	35.42483640238172	35.23914065871266	34.2077020974775	42.892099193169834	41.92272164549258	40.35818206368368
Col16a1	25.00379336846036	23.446384371688694	24.42947589929345	29.032804069216876	30.062069642804648	29.46143833356745
Col4a2	209.93608247436498	207.3813900577261	199.7695718632213	255.493824362498	248.55416547204678	248.50774206014202
Fbn2	2.6658444690974177	2.5351843831499807	2.2772426166471105	3.0366036039342195	2.9930817570457227	3.170033554861992
Fbn1	100.3925077782138	94.71405493794039	93.39005277013973	123.27283176039012	121.4962850484111	125.49964537556029
Col2a1	1e-08	1e-08	1e-08	1e-08	0.0463464226619849	0.0047250772561259
Col4a6	0.1507123529858827	0.2146982519210208	0.07988431125145039	0.22195531490116469	0.3661725825675124	0.2543841103294235
Lama3	0.3250604242687036	0.329096836829592	0.282130037376091	0.5137130756651277	0.4493400285345288	0.4077798008920446
Oit3	1e-08	0.0102706336305599	0.0105090358690882	0.041837245539751204	0.0102310463993451	0.031291969168026804
Col11a2	0.046539423982694	0.0436406277479777	0.0788004911563977	0.0914989760752121	0.1764468455480419	0.0990695736730475
Fn1	2729.6458048797776	2637.775772801281	2495.5449579897063	4163.419081426961	4110.816065788546	4077.6511963434496
Comp	0.3059899253388952	0.1250978453724534	0.045714871676820604	0.3184901397289215	0.4450559263455149	0.5263376614716302
Col13a1	1e-08	1e-08	1e-08	0.0041906905597098	0.0040992297301069	1e-08
Zpld1	0.013822671777697	0.027448296620375602	0.07021355411658789	0.0908457935636586	0.0751918563219821	0.11150387384216909
Col24a1	0.0569832678749032	0.0665613279228532	0.0374584984424933	0.1626819445704823	0.08288096384378889	0.1216771807853002
Col15a1	67.86114822524716	66.03744588170447	65.61551020375484	110.5553178883345	113.42783016306683	111.59494788652661
Col8a2	57.309238783004275	57.16998775109829	56.160369118510616	98.28010194845015	99.5150529640943	99.10917194887934
Lamb3	0.1086419256915495	0.15896277496736289	0.11037142851545939	0.2196985382370588	0.2205590175841436	0.29405072410418437
Col3a1	981.1640535291716	957.6566910066844	955.5129303693294	1845.9344289871199	1803.33433938434	1837.657893184892
Col27a1	0.7122821480440159	0.6867067792004662	0.8468465221779615	1.5082403310622223	1.2379442633274094	1.5717669818259938
Col1a2	1863.5262637035455	1878.7347332412114	1837.64184058136	3599.6595895560467	3596.011754033118	3538.2760564384503
Lama1	0.0214325732733335	1e-08	0.016935152462073902	0.0698279676678122	0.0518168189106126	0.045624020063249004
Col18a1	24.0470834520046	24.138630119426498	22.724367458340826	55.50455045951541	56.528885222016896	51.57584833549061
Col1a1	2526.782231321241	2495.8319610587514	2367.8312553481283	5956.101136185713	6023.940456224581	5759.444283936097
Col23a1	0.640609376572059	0.6803250640872347	0.8814733466214739	3.2427421688629305	2.895274693847417	2.7228183981688647
Col9a2	0.1522457537829803	0.0875140649556242	0.2116528579096171	0.9884418646835746	1.2997259457592427	0.8483774410478744
