# Supplementary material for: Peptide-based Self-adaptive Implant Coating Sequentially Regulates Bone Regeneration to Enhance Interfacial Osseointegration
Source: Research Square preprint supplement (doi:10.21203/rs.3.rs-5132912/v1), 2024-10-01
Supplement: Supplementary file 245 [file 502_SH2 domain binding(GO_0042169).heatmap-data.xls]

id	S1	S2	S3	C1	C2	C3
Shcbp1	2.0236576607840524	1.9455614935530359	2.2875205118755333	1.0879160688868552	1.0430300018985696	1.0777504544118774
Ghr	5.552988336327134	5.759325265481576	5.525641414884653	2.9350702631478818	3.4197389091703965	2.9869680805925247
Dlc1	15.590164076618262	14.447637420814289	16.112780339798597	9.218256313387968	9.537662911969662	9.449363195947042
Sqstm1	193.04521941651043	197.2642533867092	186.49629933767545	152.13993426738693	153.4818407400715	148.9585475476784
Ctr9	26.78200137633427	25.90815509974525	27.032227761498373	21.266756641908078	20.94089207809881	21.11262721369521
Sh3pxd2b	8.421859913573353	8.551663308838023	8.058352788776826	7.356749863060043	7.399294305690683	7.264001835007628
Abl1	27.45046672644505	28.236540349026356	26.769231247581224	23.51127377149769	26.10909383296952	23.53715489049151
Crk	33.768104221913795	32.14937667463254	35.10310647426742	30.20658280741325	30.10773669821063	32.42491358462894
Syngr3	0.08303985838495269	0.023556580631615	0.0723101108447185	0.0119946783555223	0.0586644446645816	0.0717708462080294
Irs3	3.2468863984218768	1.982006075717824	2.614425751934691	2.456147457231983	2.521480239272428	2.340285746477634
Snap91	0.15259863271876528	0.1818132150811308	0.2583798189617939	0.20058281633024339	0.115710723924022	0.2359366765691525
Ccdc88a	3.0058929758755104	2.5786311918826	3.5030753067948184	2.712901770637127	2.755279882588192	3.5171098455541983
Syp	0.0502295806940922	0.0099743237421942	0.10205839020510399	0.0812604530636322	0.0695510902828625	0.0101297362813765
Slamf1	0.0086701746375668	1e-08	1e-08	1e-08	1e-08	0.0087425090279035
Khdrbs2	1e-08	0.0103565992027981	1e-08	0.0105468637610672	1e-08	1e-08
Trpv4	0.8263245367594335	0.6607043434224867	0.668611628063889	0.820719819195835	0.6726227201863473	0.6783725750891941
Khdrbs1	35.719976820012825	36.35068266434765	39.8845353368624	37.67417201519015	37.48440034266222	38.261162920934346
Kit	0.0044853707928007	0.044533932126068904	1e-08	1e-08	0.0310535989802437	0.0226139187376439
Nup62	9.89985896240043	10.392678145007498	9.731929783775653	10.286616770455852	11.58727609352615	8.74390148559081
Arhgap5	6.671244428209728	6.057928572221982	7.98143565715529	7.119274807925936	6.706086833552472	8.151134782421954
Ptk2	11.310792549013073	10.722656077752449	11.184150854367832	11.471178078736322	11.78406830480799	12.70583661916198
Rack1	706.1358218349867	780.7123315072156	693.6004012275333	818.8578132554376	832.0759227695916	736.4755156197684
Ptpn6	1.3773472593697744	1.6591362315175548	2.2635309112641	2.4064239359372634	2.103488840967155	2.0117731813025146
Jak2	14.316782306957117	13.41171702845712	16.255475342200707	17.740894176548316	16.870162740296564	18.40436220523281
Inppl1	16.18727422615254	16.866533712373155	16.856460176687197	19.924815293577964	21.111709882088572	20.24912868642547
Pag1	0.3691540311358368	0.3535256865466433	0.1835256684243331	0.3759036855133144	0.4764558908636203	0.3643139804376621
Afap1l2	3.5855427466206153	4.502171134862183	4.02362532063045	5.2226288691790215	4.777061677959166	5.414590309668398
Nlk	2.0920213212360514	2.1630344747884442	2.0565193482038047	2.583216616951498	2.6012666205756543	2.8948369044686166
Dag1	75.08350477804046	74.48191488183521	72.52241996728534	97.29639340578635	98.48241658387603	92.98937702944319
Src	13.907358164387732	13.97566828767456	12.093084323871652	19.548264281188327	19.396334849918585	17.654262662612435
Pira12	1e-08	1e-08	1e-08	0.0118258228118659	1e-08	0.0353802493359414
Fgfr1	20.25838872759411	20.583712282707257	19.57078308313211	28.809893605222513	29.14468186540845	28.169036488392262
Rufy1	4.596575566297533	4.8617703534452374	5.294366029354632	7.2823172616292675	6.7976176102154025	6.959767011245072
Afap1	28.15155291750198	26.04410721988525	25.866860152878402	38.45773042849573	38.88580134955133	37.42796880930739
Lck	0.0265649534837641	1e-08	0.0269878486847528	0.2417414711128689	0.0963378056242	0.06250201221257709
Sh2b2	0.9182322641285985	0.7750659420131621	0.9140315782696277	1.4608830552103222	1.3112248648690876	1.3101252378716348
Syk	0.5559910455341377	0.5751903492549122	0.4581935378922481	0.9356392896312299	0.8267735893746656	0.9487578248669096
Blnk	0.2696543549723953	0.1019933179841725	0.1434960850313304	0.4414350280472722	0.5080009279631452	0.8286599612435389
Siglec10	0.9198402026265496	0.9893912284350053	0.9656328577107592	2.0306363990764433	2.0393877029650906	1.9168629694078039
Irs1	1.1587025766419712	1.0494509513885084	1.2445422922885725	2.293970251557792	2.296393774849276	2.782681605705564
Lat2	0.0896902358530117	0.0890509853422415	0.0101242356794373	0.24183190936992568	0.226697557692055	0.2713155196045961
Lilrb3	0.0154322626342787	0.0357519549125488	0.0104519588222216	1.1494764658580499	1.048073335554813	1.296750218842302
