# Supplementary material for: Peptide-based Self-adaptive Implant Coating Sequentially Regulates Bone Regeneration to Enhance Interfacial Osseointegration
Source: Research Square preprint supplement (doi:10.21203/rs.3.rs-5132912/v1), 2024-10-01
Supplement: Supplementary file 249 [file 503_heparan sulfate proteoglycan binding(GO_0043395).heatmap-data.xls]

id	S1	S2	S3	C1	C2	C3
Fst	34.83000222060989	32.029717772533544	35.88854717966395	11.193469020375963	10.595195933373068	10.37541826117954
Lrrtm4	0.018448174881336203	0.0274750284928147	0.0046854716701096	0.0046633052936544996	0.0091230494694588	0.004650529058279
Lipc	1e-08	1e-08	0.0525795951679628	1e-08	1e-08	1e-08
Cfhr4	0.0174425290609172	1e-08	1e-08	1e-08	1e-08	1e-08
Slit1	1e-08	0.0047474771830274	0.0291460037976692	1e-08	1e-08	0.0048214487813416996
Agrn	2.8370333789443887	2.6710724033565563	2.9053368037374536	2.4079540409323332	2.6908139787856524	2.5978547141917643
Cfh	16.78646488781478	15.200938641408634	17.642337513084048	18.1447327721606	17.89750585686871	21.04999786293673
Apoe	26.08497439530461	27.708829951916858	27.722763126978283	31.188181668876144	34.218114159392705	34.40394217857564
Chrd	2.0315983822570804	2.270732858415814	2.0518701737924303	2.636792829497326	3.0316414139488486	2.2342349039441207
LOC100361907	0.0151009153732111	0.0074966482303416996	1e-08	0.022903094857419603	0.0074677530861291	0.07613446422577949
Hpse2	1e-08	1e-08	0.0034106381319074	0.006788995690521	1e-08	0.0135407812152017
Slit2	16.98560520214901	15.969596983118286	17.12370459048941	23.246844372207953	23.11578387040961	24.8927957097128
App	246.8160517414219	250.9273330756075	245.8545423188853	355.97205369291476	352.4521928050844	351.87120106202036
Ptprs	13.895295862308037	14.939881060320324	14.107187516346972	20.79036640912264	20.566276244451014	19.88312082431608
Lpl	32.05270047920999	33.328980160459125	34.84069725215304	49.39139288669232	51.21857662718624	54.55742241774863
Itgam	1.4073236132805402	2.1483382502030226	1.6978010652470932	2.8281396296002983	2.8360113754163905	2.5661421454182114
Comp	0.3059899253388952	0.1250978453724534	0.045714871676820604	0.3184901397289215	0.4450559263455149	0.5263376614716302
Fbln7	0.1868754666519576	0.1855435463676788	0.07817369686183889	0.3667896178187314	0.6849522226464079	0.5098817105011167
Ptprc	0.5584921298145432	0.4582740351530561	0.5439373559773472	1.1200635439238664	1.1275738993900477	1.0844158402012944
Sema5a	0.9650774311583185	0.8596925798785909	0.9644055380676521	2.9935247317787383	3.157897421906581	3.1899531647302037
Pla2g2d	0.0118332032159895	1e-08	1e-08	0.1196469767047608	0.10533213436926979	0.0715915087862202
Atp1a3	0.0719504011262834	0.0649432627357783	0.0465155131769064	2.2155676737026484	2.4001078829324496	2.4403406157253182
