# Supplementary material for: Peptide-based Self-adaptive Implant Coating Sequentially Regulates Bone Regeneration to Enhance Interfacial Osseointegration
Source: Research Square preprint supplement (doi:10.21203/rs.3.rs-5132912/v1), 2024-10-01
Supplement: Supplementary file 253 [file 504_transmembrane receptor protein tyrosine kinase adaptor ac...(GO_0005068).heatmap-data.xls]

id	S1	S2	S3	C1	C2	C3
Shc1	100.75947629607876	102.67265380377755	99.631886081142	86.71181347307665	83.94137614285097	83.58139251076193
Gab2	4.527947234579401	4.211238740417576	4.15942865401932	3.6408887722329855	3.62045622452746	3.767323684953284
Tradd	15.769757170737503	16.906203504057753	14.519349701127364	13.465026741650984	12.969000337553936	14.141555283520837
Frs2	9.612713063043424	9.94042703874129	10.103594062180447	9.680605307589877	9.261591257918415	10.381227746508921
Sh2b3	11.169906825514225	10.980923629592084	10.088730846580711	10.547786035414585	11.592299719913681	10.091245584258319
Sh2b1	9.7774360695593	9.201138876346185	8.384981598983286	9.516585252095199	9.27478904687168	9.302787826797779
Grb2	42.751066826508776	43.96751310799614	43.049509901534456	45.60081989103561	43.81619123592394	44.38431606086827
Irs2	4.96787913148991	4.551902587087632	4.470495583876477	5.315657825368049	5.667947087464532	5.126790969460664
Frs3	0.7736555983059603	0.6707714616345193	0.9630920204223853	0.9475180915626082	0.7651807760309114	1.065784266780871
Pag1	0.3691540311358368	0.3535256865466433	0.1835256684243331	0.3759036855133144	0.4764558908636203	0.3643139804376621
Sh2b2	0.9182322641285985	0.7750659420131621	0.9140315782696277	1.4608830552103222	1.3112248648690876	1.3101252378716348
Irs1	1.1587025766419712	1.0494509513885084	1.2445422922885725	2.293970251557792	2.296393774849276	2.782681605705564
Stap1	0.0596428805924309	0.047374231643026204	0.0605923531091763	0.16282536693093488	0.2949476462481233	0.3247585242672648
Dok2	0.7590524645921847	0.6001227004631206	0.756855748415067	2.11059168028018	1.8768440069982983	1.9488974075753123
Sh2d3c	0.023837143850867503	0.0197227092368722	0.016144412828418102	0.1044421759359377	0.10216274494473579	0.120180034388613
