# Supplementary material for: Peptide-based Self-adaptive Implant Coating Sequentially Regulates Bone Regeneration to Enhance Interfacial Osseointegration
Source: Research Square preprint supplement (doi:10.21203/rs.3.rs-5132912/v1), 2024-10-01
Supplement: Supplementary file 257 [file 505_3',5'-cyclic-AMP phosphodiesterase activity(GO_0004115).heatmap-data.xls]

id	S1	S2	S3	C1	C2	C3
Enpp1	23.041804287318712	23.09607844375177	23.130658965163295	12.605146065477784	12.818301293883964	13.02641579592919
Pde4a	3.379100550127065	3.5416318286500608	3.6611995456428894	2.912624240633989	2.707614221066033	2.8222431366548846
Pde1c	1e-08	0.0102931174826408	0.0015045859453554	1e-08	1e-08	0.0089601419158885
Pde8a	5.952686753460894	5.803349066328675	5.873543094052505	5.87925607660836	5.322215923943428	5.868716462156134
Pde4c	0.0022780761559741	0.0135709879624889	1e-08	0.020730452788012603	1e-08	0.0022970818534927997
Pde7b	2.523070355009749	2.77139425000691	2.7017891480225917	3.1187888030358004	3.082195730276132	3.1767121224559265
Pde8b	1e-08	1e-08	1e-08	1e-08	1e-08	0.0054635717494747
Pde1b	0.0144159732421279	0.0286264422561361	0.036613648073581403	0.0510166024698199	0.0356451276835631	0.036340595761346205
Pde7a	0.7445801692983036	0.631639651005837	0.7332476647263597	1.0182288518410596	1.114511180560228	0.9348944165893315
Pde3b	0.9844107330288983	0.949667023468434	1.0390921436875284	1.6589176390258948	1.6089017526264284	2.016926628944738
Pde3a	0.521527061232648	0.5244485628250538	0.4958659820388858	1.0501386438038547	0.9390462098786733	1.0427668481188694
Pde4b	2.4853229120129585	2.7433592600019514	2.8395941104901166	6.343559838915954	5.879362002491671	6.340541471147532
Pde4d	1.0102834822038653	0.8568989964285745	0.9911003373186172	2.2052047187886594	2.1215593565465336	2.458669085864794
Pde10a	0.3278324055745876	0.3687883896740492	0.33469191313231317	1.0891342216419524	1.2490475268977612	1.0861502727029992
Pde1a	0.39385215346735647	0.2805323177857923	0.3957728502649096	2.0993597366763668	2.155160151007667	2.520963067240898
Pde2a	0.6601331896786566	0.3653206474186291	0.5332153986634537	6.040050118211928	6.266788025195672	5.488807010520039
