# Supplementary material for: Peptide-based Self-adaptive Implant Coating Sequentially Regulates Bone Regeneration to Enhance Interfacial Osseointegration
Source: Research Square preprint supplement (doi:10.21203/rs.3.rs-5132912/v1), 2024-10-01
Supplement: Supplementary file 261 [file 506_3',5'-cyclic-GMP phosphodiesterase activity(GO_0047555).heatmap-data.xls]

id	S1	S2	S3	C1	C2	C3
Pde9a	0.0081761908098049	1e-08	1e-08	1e-08	1e-08	1e-08
Pde6d	20.760129188428092	23.364592885534464	26.447971055523272	23.562005543505393	20.656408463113728	21.05943343860464
Pde1c	1e-08	0.0102931174826408	0.0015045859453554	1e-08	1e-08	0.0089601419158885
Pde8a	5.952686753460894	5.803349066328675	5.873543094052505	5.87925607660836	5.322215923943428	5.868716462156134
Pde6c	1e-08	1e-08	1e-08	0.0080367196467346	1e-08	1e-08
Pde6h	1e-08	0.031387803712085105	0.032116378777494	0.0319644399567725	0.0625336343473991	0.1912611436064442
Pde1b	0.0144159732421279	0.0286264422561361	0.036613648073581403	0.0510166024698199	0.0356451276835631	0.036340595761346205
Pde6g	0.0255153328719774	0.1520008127393433	1e-08	0.2321899047614265	0.3028298675616508	0.1029127895051916
Pde3b	0.9844107330288983	0.949667023468434	1.0390921436875284	1.6589176390258948	1.6089017526264284	2.016926628944738
Pde5a	0.24009157649279758	0.1868386691450264	0.2538020566572229	0.3903838968836797	0.4973856717300156	0.38277124689900277
Pde3a	0.521527061232648	0.5244485628250538	0.4958659820388858	1.0501386438038547	0.9390462098786733	1.0427668481188694
Pde10a	0.3278324055745876	0.3687883896740492	0.33469191313231317	1.0891342216419524	1.2490475268977612	1.0861502727029992
Pde1a	0.39385215346735647	0.2805323177857923	0.3957728502649096	2.0993597366763668	2.155160151007667	2.520963067240898
Pde2a	0.6601331896786566	0.3653206474186291	0.5332153986634537	6.040050118211928	6.266788025195672	5.488807010520039
Pde6a	1e-08	1e-08	1e-08	0.0076514507279075	0.0074844594465007	0.0076304877389594995
