# Supplementary material for: Peptide-based Self-adaptive Implant Coating Sequentially Regulates Bone Regeneration to Enhance Interfacial Osseointegration
Source: Research Square preprint supplement (doi:10.21203/rs.3.rs-5132912/v1), 2024-10-01
Supplement: Supplementary file 265 [file 507_CCR chemokine receptor binding(GO_0048020).heatmap-data.xls]

id	S1	S2	S3	C1	C2	C3
Ccrl2	0.1443793979585066	0.13311104979728788	0.2095397331214549	0.1251290589771218	0.0305995426456023	0.10398853284496709
Ccl17	1e-08	0.1551779472300447	0.0396949938520512	1e-08	0.038644964320298604	1e-08
Ccl22	1e-08	1e-08	0.01378520209991	0.027439961905584603	1e-08	1e-08
Ccl5	0.2432693897109085	0.2415355321611484	1e-08	0.409954770918196	0.1203022821820256	0.3270652818521159
Ccl25	1e-08	1e-08	1e-08	1e-08	1e-08	0.0177120017249291
Ccl24	1e-08	1e-08	1e-08	1e-08	1e-08	0.06536829157482399
Ccl19	1e-08	1e-08	1e-08	0.1339376773433434	1e-08	1e-08
Cx3cl1	2.2622502926619514	2.0508111729633924	2.2649555549672193	3.169196670754258	3.0676024515568456	2.6117217252743736
Ccl11	0.2178977366122248	0.3365362112933792	0.1475776800266443	0.41615858529609917	0.4070760012144344	0.5859083497596188
Ccl7	97.50027735141671	95.49442585061105	110.1410371748048	178.56633709606038	166.89189861148552	179.733917525015
Ccl3	1.1619285592469741	0.6235930468793576	0.7656815022337302	2.635454541992944	2.2673415076410772	1.4566116583811741
Ccl2	134.9051384899577	123.15338886330427	140.0133684370735	309.67225801201914	308.1979697475727	325.9041901470409
Ccl9	0.017829994657526403	0.017702914736710602	0.0181138354626077	0.5949283347300809	0.33505874798487867	0.2876598274121019
Ccl4	0.036881972033014104	0.1830954733204967	0.112407300721229	1.6408407477809916	1.3496840688313656	1.3760176101130297
Ccl20	1.2172401865706168	1.409991952505798	1.8843699655911303	19.018288096189842	22.444251582916866	23.9634359623472
Ccl6	1e-08	1e-08	0.1557528459202066	4.839943613289183	5.256603465573748	4.191141464841647
Ccl12	1e-08	0.0435360423895403	1e-08	13.655441261088475	15.178879290250643	12.468454984717885
