# Supplementary material for: Peptide-based Self-adaptive Implant Coating Sequentially Regulates Bone Regeneration to Enhance Interfacial Osseointegration
Source: Research Square preprint supplement (doi:10.21203/rs.3.rs-5132912/v1), 2024-10-01
Supplement: Supplementary file 277 [file 5_ferrous iron binding(GO_0008198).heatmap-data.xls]

id	S1	S2	S3	C1	C2	C3
Tf	86.09698184087955	92.56079599295572	87.63550951687795	6.246479986657218	6.273634034133513	5.948107220563589
Fth1	14914.332884871563	16299.8905266539	14676.117161457576	3809.538481670412	3841.849768844073	3548.319284142597
RGD1566189	1.9753509337264838	1.5483726218782732	2.2180389320689504	0.7621288608134542	1.028269705635609	0.7076242150719215
RGD1560687	4.0331033527530105	3.539335917888125	4.440952664955635	1.6837878280306038	2.0330643431098663	1.9415457226869564
LOC100362384	20.077730061775775	23.26120557331533	17.044363794397228	8.797880260361861	9.916531973630939	10.034376365217927
Ftl1l1	1.711678537122537	2.188722777447865	1.5281481944818132	0.8915730365927382	0.8721146198745168	0.8368285697442966
LOC100359668	7.289582907712901	7.340289139083634	5.462307132907586	3.580748974142252	3.630431897740547	3.4927429022024
LOC100360087	17.95211423563811	19.411948569571518	14.621764061855565	9.388767867891238	9.05630613519156	10.091281883572258
Ftl1	3550.724809984261	3383.20598950582	2984.75692629994	1822.522812197148	1926.2764799390402	1863.586854963693
Phyh	36.65096610761672	34.53012741464657	38.7967071999937	22.725352352123082	24.198820423624756	22.106453388740523
Egln3	1.2860374976304043	1.6190396809720433	1.4431388372005576	1.1218527827959492	0.7149522426434808	0.8560355972792513
Nt5e	25.29530965206086	24.973599226573263	27.119511844004556	16.232003548600492	15.140206986351915	17.970188200286586
LOC102549852	0.5328432083166267	0.7935681953283301	0.3721614197858977	0.3704007672627976	0.329378945556976	0.1343221750925708
Dnajc24	4.894500530892548	5.648237757002014	6.629890041876952	3.169028363121402	3.460808076954181	5.086858340573934
Iscu	116.49479050365463	116.75855025158474	109.10733383934155	83.2765419287437	82.49819453967395	83.28094167243937
LOC120102993	1.9233680146810503	1.187085679106676	1.0826142457717496	0.8146894712143821	1.1825101599809504	0.7600408228550268
Hif1an	4.957655736299512	4.37916830455436	4.531762480106787	3.4732024130320878	3.449251910913989	3.636066623892324
Snca	1e-08	0.0031531024745643	1e-08	1e-08	1e-08	1e-08
Cdo1	65.81742405291517	66.8241202336741	72.05977687305393	55.50247033827397	54.570459950232824	55.54525080493267
Th	0.266047421519046	0.0880504125855871	0.1415766618768182	0.0256194407518701	0.1754220498359625	0.0510984901395494
Urod	28.319150681733326	28.813191110175143	27.788521089609066	22.926244466827452	25.985547446164862	24.830795449012648
Alkbh1	3.1840336387805004	3.141280763403659	3.320925711945991	2.8394614154859625	2.561685662884426	3.1739284766235967
Dph3	9.514800667965076	9.27417497097185	8.944246411290179	8.425304875307328	8.693303804651885	8.102403516427733
LOC365803	0.07353485355650649	0.2920429601907053	1e-08	1e-08	1e-08	0.1853708550714632
Fxn	16.00280175919318	21.53807620892053	17.762884273407238	17.678850125390944	16.970600388198342	15.897255201049779
Alkbh2	2.5281923843236194	2.510173160364253	2.2809275522365096	2.403674203418688	2.51915834700688	1.7883043091627246
Alkbh3	8.748288787552998	9.568887593095853	9.658789531178957	8.48730281356638	8.91703706974716	8.493211016004032
Egln2	17.017504551669955	18.86628170288171	18.205400592856385	18.260891237513036	18.15479758752226	15.68440813539064
Fto	26.400901612785482	25.72637049920141	25.17777294543577	25.513643528563463	24.39908735175977	24.961287962191143
RGD1563378	0.0273736743065839	1e-08	1e-08	1e-08	0.0270738161480936	1e-08
Tet2	1.5149059066053527	1.6067700811898797	1.6978101398840664	1.7359733662366779	1.588685565853708	1.7821353975520748
Acp5	2.9072697398909013	2.678014775474245	2.6840258228982177	3.2190061327055663	3.7828755665186478	3.0429896471339015
Plod1	86.53555092602889	89.62057166690171	82.84428482360408	120.99770695634429	117.58226554229799	112.33377552880351
Egln1	8.526819549185426	9.839632498939368	9.074741630186148	15.7636357516257	14.327595113602237	13.151790701417404
Heph	0.4977143687822036	0.3996307076060529	0.4836533866363978	0.8927137807320454	0.7062893506117097	0.7768024487582517
