# Supplementary material for: Peptide-based Self-adaptive Implant Coating Sequentially Regulates Bone Regeneration to Enhance Interfacial Osseointegration
Source: Research Square preprint supplement (doi:10.21203/rs.3.rs-5132912/v1), 2024-10-01
Supplement: Supplementary file 281 [file 6_C2H2 zinc finger domain binding(GO_0070742).heatmap-data.xls]

id	S1	S2	S3	C1	C2	C3
Wt1	0.2314958096334556	0.1543740924552502	0.2386912247344704	0.0034935687388913	0.0034173224643369	0.003483997282242
Hmga2	16.439674623143894	14.843013846323405	17.932140420487485	4.728249793843613	5.248121235545272	5.326085183962213
Ebf1	14.98764362877487	13.999796934316972	15.246005563337725	8.381836403842247	8.42985942430657	9.544026982967992
Gata2	0.7471140205341061	0.6016084873928531	0.6514316779163701	0.4342159445953921	0.3549191109699777	0.5694592460595351
Lef1	0.1181204155299692	0.0928455082990404	0.1400009424468103	0.06966931212569459	0.0827521029968232	0.0942921596692755
Zxda	0.6034721444164509	0.4162180317163447	0.6458389418247739	0.3074182260472947	0.4100575603169434	0.4319934206233492
Zxdb	0.7373428612114997	0.755703314561785	0.6564525656567743	0.5811982211929154	0.5018603509872639	0.6115841421473771
Zxdc	3.8185981339812574	3.9455421584832173	3.987832922582686	3.5715796516781326	2.994540503134225	3.6694310825211773
Mbd2	54.35392660517501	55.451185151252794	54.11304895324008	47.20748465070782	48.30225970226962	48.483466084382094
U2af2	50.792718680896	50.34252554184965	49.41510120045653	44.97466307490509	46.418767097522746	45.988057167122044
Ehmt2	15.807297976785392	18.55411227951053	16.013222592215563	16.388331133887515	16.09539647534308	15.279169496288413
Srrm2	44.3150712618966	40.93075294325647	43.89395306192046	40.70101832788709	40.59713354137851	41.98605501592323
Taf9	29.56410244305076	27.762021483248176	32.1419632315539	29.742847537968068	29.186964469021202	29.240342280605923
Ehmt1	8.019415265149972	7.563502292141262	7.203825118873107	8.064871119883097	7.376316020096737	7.768441462461199
Thap7	8.95189465539634	9.449285181928488	8.318429606701846	10.070816423245141	11.346806836383127	9.45788363255196
