# Supplementary material for: Peptide-based Self-adaptive Implant Coating Sequentially Regulates Bone Regeneration to Enhance Interfacial Osseointegration
Source: Research Square preprint supplement (doi:10.21203/rs.3.rs-5132912/v1), 2024-10-01
Supplement: Supplementary file 285 [file 7_alditol_NADP+ 1-oxidoreductase activity(GO_0004032).heatmap-data.xls]

id	S1	S2	S3	C1	C2	C3
Akr1b8	302.451699633338	290.47082976742803	301.864402256655	53.500376128312844	51.46013489227227	54.43578209413183
Akr1b1	328.3827770375377	349.46395959772354	317.13647742881807	174.1157166420906	169.33624446396104	158.58928494894585
Akr1c14	64.03858881058163	64.7195562026617	65.30742201740642	38.30617287019624	37.298173498915055	39.50072543424756
Akr1d1	0.0069254910252106	1e-08	0.0070357398082313	1e-08	1e-08	1e-08
Akr1c12l1	0.0584647498152965	0.07739740091473829	1e-08	1e-08	1e-08	1e-08
Akr1c15	3.967124710539824	4.398087850043269	5.096585419800701	2.7340995003971766	2.8855673579853964	3.0136202158560104
Akr1c1	0.0763198153995007	0.151551710179544	0.0969184637241862	0.0771679649963663	1e-08	0.0384782772767195
Akr1e2	13.70039126477907	11.678782912601172	14.177520854203607	9.280928466795572	9.465045397717775	8.981264029301608
Akr7a2	42.29341159133722	48.47408237555653	38.38383684719526	33.33314480193121	32.68095681403804	26.850639092348104
Akr1c13	0.122004312468306	0.07454446498327949	0.095343490833702	0.0474462209346465	0.0649749985956032	0.09463245092431409
Akr1b7	1e-08	1e-08	0.004840082477735	1e-08	1e-08	1e-08
Akr1c3	0.078469669072726	0.13634317688687858	0.1793674018219446	0.09917713525941439	0.1164151333708417	0.0395621721295848
Akr1b10	0.5632412417560401	0.09868709834569299	0.28049394906649977	0.2233335737837933	0.2075363924831711	0.23385778133829
Akr1a1	460.671539943115	497.2681060886449	441.51504359507084	430.2759250910437	419.78172679746126	395.1793259993877
Akr1c12	1.5370413825475862	1.5067688549034008	1.1068931669459403	1.4754329211106807	1.7511213337035252	0.7455045819948806
Akr1c2	1e-08	0.015662539973585403	1e-08	1e-08	1e-08	0.015906582182014902
