# Supplementary material for: Peptide-based Self-adaptive Implant Coating Sequentially Regulates Bone Regeneration to Enhance Interfacial Osseointegration
Source: Research Square preprint supplement (doi:10.21203/rs.3.rs-5132912/v1), 2024-10-01
Supplement: Supplementary file 289 [file 8_single-stranded DNA binding(GO_0003697).heatmap-data.xls]

id	S1	S2	S3	C1	C2	C3
Fam111a	1.5055898853275311	1.1853508078328627	1.644106198319243	0.4426133518720153	0.3739142991125369	0.7757951702363356
Ddx11	1.1211278331626464	1.2368191119755774	0.9567393367068249	0.493740137880265	0.389328407123312	0.6179964485438024
Rnf138l1	1.7637407642044762	1.3352671486512648	1.6350341772691255	0.7356283295917574	0.6977681237609235	0.2667683322927873
Samhd1	3.5173141956621943	4.138263733908993	3.659526573870584	1.9259873949461468	1.8186675735323348	1.816117527098388
Rad51	2.346924697901211	2.609501910660228	2.2454749112030994	1.1214892867114479	1.2957472258351872	1.256192661393989
Mcm6	12.550350542544189	12.041232614052474	11.35456413451825	6.254505147875331	6.206435392620653	6.073443796576212
Mcm10	0.8072120426771056	0.6118663889644341	0.6319476451519734	0.36859863081383837	0.33193863523212547	0.3850929913742655
Hmgb2	20.9275316410594	17.309161019379882	21.166275206450965	9.86594425627307	9.466800476108329	12.781217925564714
Mcm5	7.180974832146778	6.594116135342572	6.2531064842034185	3.73411426105411	3.569945485320273	3.5323259386390427
Neil3	0.1558566455076132	0.1785528516988742	0.2679562250458463	0.0727332496079675	0.0711458600803068	0.1088009637249823
Meiob	0.031539430080179905	0.0078286671729443	0.0480622681705155	1e-08	1e-08	1e-08
Mcm3	6.460632922740817	6.84757050684871	7.2198298151234175	4.205252189186788	3.5703351110201718	3.6562818706742166
Rpa1	24.73219407314975	26.08167812960536	25.38747117063521	15.179943638339742	13.050255328275787	14.335194193308284
Ssbp2	2.191808860273881	2.4084612513663135	2.5718819948080225	1.419247769463869	1.570070595899502	1.567005042183497
Anxa1	376.73565673419887	382.1649941795588	402.3250159005025	234.15497377769	235.81783786798562	268.5453523514573
Hnrnpa1	171.37016691315958	166.30996689879058	192.3899366655887	114.0600024432417	108.72141311964707	124.16926584850731
RGD1561694	0.0686989063980515	0.318309879308438	0.162849257099034	0.0463082460495602	0.0452975773464235	0.0230906916684762
Mcm2	12.154725901724852	12.346643413552636	11.60718484091374	8.134104769820254	7.914958269761027	7.673342680926198
LOC120093168	3.8961434210548287	3.975235549277664	5.423345221960973	2.459430426592145	3.3212176478397772	3.1906704029500514
Blm	0.9449744491361981	0.6951721400910472	0.8505856999612609	0.5396211899216024	0.5907979344847646	0.5578911240422052
Ybx3	93.68763601154511	93.18955057742534	88.89249669898204	64.27143952543234	64.3656016801621	59.049443168397424
Mcm4	12.913458511791037	13.159381875668604	12.434623109717299	8.812197981919208	8.248145732098463	9.367251267028404
Rad51ap1	1.5137793180993047	1.6600189549294193	1.7559348920584363	0.6967666322781401	1.1284843010916985	1.3441508934609383
Nme1	136.81534465030637	143.70009688883675	143.6607677776486	103.26943990362604	92.62676440248899	100.99092175822305
Hmgb1	16.85098915596664	14.831637555069126	18.39136220417084	11.611208731408807	11.388913494487065	12.182160122355187
Hrob	0.4974129690328754	0.3112043393686854	0.2838162887879321	0.1997983936233257	0.19543783078415208	0.2816996815549304
Pms2	5.476700269600825	5.675755999993454	6.192573106668508	4.544243401002534	3.7794538176255768	4.32899363596814
Shoc1	1e-08	0.017337368031232803	0.0035479687336789	1e-08	1e-08	1e-08
Smc2	5.112103624616191	5.3850580301979525	6.541052823041168	4.0108055002081695	3.9191055802175057	4.65796089123587
Mms22l	1.200702423478904	1.1236305797739532	0.9487463716692508	0.655863908058052	0.9691496920974376	0.7932302001165656
LOC102553382	0.1795748067241231	0.050941413012679904	0.2475883328995219	0.0129693263800772	0.0634313272212919	0.0905364964119345
Smc5	6.0965774258200325	4.901988435116072	6.3043017750143155	3.8040245289584456	3.998057382413232	5.174520849767449
Tdp2	4.505742015219619	4.307012597707962	5.932810608576451	3.4359496929330877	3.3858567306893	4.3656607683719
Pola1	1.981167705745452	1.6946869052221216	1.897694701422059	1.3207810712884873	1.274729198333559	1.6420625425683097
Cnbp	146.62282153524654	135.20678087962804	152.57363857230158	111.26592678741291	106.6676407782269	119.37882423602231
Mcm7	8.000859609380992	9.017326170682873	7.7254776435256876	6.413514491920223	7.0488220319246135	5.805408585375058
Ssbp4	8.77970902411957	10.159352975428888	9.650794471671823	7.733500570469857	7.9334189060342135	6.7790581066568585
Rad51b	0.16501839636683768	0.1625721633638588	0.13645553795818569	0.1189954146170331	0.0999507686780107	0.1457569752894708
Ercc4	2.137064479292692	2.23845851644252	2.4135998586786807	1.8734716183209275	1.8100977599828418	1.7498960412215785
Ssbp1	12.412456686928948	11.784689830991972	13.529750274991574	10.41459246137026	9.868942907007728	10.0817800678306
Dhx9	24.961591972604047	23.391836699899738	25.73505988492358	19.54936407782737	18.893249910156523	21.257742693733217
Rpa2	2.416785417131525	2.5117474566096942	2.372354092644646	1.6883354389521803	2.011586677832641	2.240726615302858
Spen	5.893664218895478	5.71705138220642	5.252920085434269	4.65880741501492	4.66142047299855	4.414405836250528
Rad18	2.262629546690897	1.8720858956524884	1.9054590546399128	1.6756943906718282	1.7470888333956314	1.5310109158324738
Ercc1	14.245748538600981	14.863629691058472	12.645390242895077	11.434287947094095	11.799001440212631	11.233351666678164
Purb	19.360090210793572	18.124239580862984	21.527625274285242	16.16330815375732	15.339153170849565	17.30127888333657
Alyref	34.42635345823587	35.5610633537676	36.714906657966544	30.412878718543173	28.2304952548917	29.661359749434897
Hmgb2l1	0.8456507108998248	0.6186699439566258	0.4521646756831396	0.4950280897252803	0.41819362282323197	0.5834303539617632
Smc4	8.20247599789169	7.506990990918214	9.344482943065275	6.1069757112576335	6.20344948178849	8.521880104247238
Ighmbp2	5.5849795047965705	5.188857220532331	5.408043607288359	4.596256936704948	4.850887462060073	4.131329070679522
LOC100912427	100.15289444060608	104.16906364420811	108.99894642612003	87.91215801003534	84.3607035795205	91.22254378111984
Brca2	0.4378336566654733	0.3888388348729433	0.5029187098910222	0.3492653149532388	0.3307623248440207	0.4414864627221416
Dmc1	1e-08	1e-08	0.025370191277211802	1e-08	1e-08	0.0041968398198636
Rad52	1.6419405256859543	1.388721173917581	1.8927361744253088	1.403054146690003	1.4653863609808702	1.321166544745145
Trex1	12.558741987677008	14.543595771188208	10.471069750361082	9.881678180430525	12.604847492977886	9.573713560675126
Rexo4	10.554867402247984	12.023692887480761	11.16118663487526	9.3432164306146	9.655310847081468	9.833577734380823
LOC108349189	0.19121039728286748	0.4429776746903431	0.2913814930808711	0.1933353373563067	0.0630386165090201	0.3534770130918561
Ncl	174.26971914708307	167.1085613109389	201.4205356836681	145.73739409371632	143.6714197093144	179.63148508128987
Pura	3.502984141339978	2.8868794437250966	3.8979824674030206	2.704212472441512	2.8321330063618437	3.4194453443793797
Cdc45	0.9487788451559008	1.3720676509874294	1.0162676671390563	0.9384678773284141	0.9485855220136726	1.0502840907341684
Ybx1	279.4029915873021	271.45382708426376	277.5981159949331	240.6769354357688	245.2189267714575	245.7726125957171
Polr2g	42.44519787810754	45.35718045198808	44.68183294579591	39.58785391462053	41.79028641773526	35.77214826590889
Nucks1	24.79458256935189	23.718287665964738	26.689146848428077	21.48751198978636	20.682510222603717	25.001441503184722
Twnk	5.093372432973621	5.164187794451373	5.324439549050027	4.805495616112747	4.841017294940781	4.3400071449316515
LOC367191	5.850413664023946	6.780355674333262	6.851290026124652	6.38866428419041	6.333397618039892	4.805185387651212
Ctc1	8.469430047856317	9.172505630638685	7.840328016823838	7.848969586326621	8.001996991184939	7.206057021542129
Cry2	8.654756364054169	8.759006355031492	8.883491241160206	8.726797015899256	7.768892495661937	7.3306482533725825
Nol12	7.641800944826012	7.728363960037657	7.388267574333311	6.979904032966171	6.658986967876348	7.1469746097342695
LOC120094772	0.0667227141217191	0.095230288668209	0.0466021167907314	0.0548146726433769	0.0701163043655718	0.0588694548455199
Mcm8	0.3472711149489852	0.39405257493855117	0.4247993074098289	0.4586192600472462	0.2733717102112956	0.3287294870665685
Mcm9	1.021480811003957	0.9118051641420268	1.0402366385783512	0.888831927190595	0.8014329629164499	1.0522866489310272
Smc6	7.3705801554617265	7.332720484834327	9.53723859708779	7.138701088155233	7.227721979917891	8.285177263196244
Hnrnpu	52.61335742344656	49.07097984360606	54.24913064797001	45.96204743670467	47.99239835325121	52.68958767479023
Tsn	34.34696999701557	34.24894952768209	35.66972249224642	31.44016009686761	30.68087667856311	35.950293174423365
Dhx36	5.2576505405327385	5.0543260559856815	5.803784696635143	4.952947625190717	4.787026155798773	5.524691981236024
Ptbp1	71.98050081083083	71.7932835090688	70.98233282726926	70.43833791036424	67.71736444122627	65.49615384487475
Wdr48	14.471028046788446	14.876751184821535	15.283326909614425	14.461141152154552	13.6445916127031	14.567438912243412
Pcbp1	121.73611646397922	122.08747369666807	120.17398029773908	119.7447923537285	114.73993644683344	115.13424381909708
Stn1	2.1695239104738437	2.032276661173297	2.0664696334207906	2.033439333937948	2.117957042437797	1.8964561859195428
Msh3	1.9543328930774084	1.859293622559668	2.3940247128605714	2.0650056793809344	1.9080638612890144	2.0340022699019724
Xpc	5.865785218553697	5.888688784076552	5.859844983766467	5.53557412274512	5.266499920236308	6.309037789079628
Swsap1	3.622369152049224	2.6494595231910982	3.9253703662415953	3.4306586579204303	3.499092717396018	3.031649906203932
Polr3c	6.530051411600787	7.399462566168778	7.065858758980055	7.892051952883247	6.610589953879539	6.247096617702466
Rtf1	9.374329633164525	8.760312941210826	9.653169906359206	8.818056235495066	8.978905286702943	9.689238200413797
Fubp3	9.709853726358253	8.86032050012552	10.340094772568351	8.780752322291923	10.143754686390261	9.880789698763992
Jchain	0.2740810625311964	0.1064847193171444	0.2300191564884335	0.156636977533515	0.2239345867709707	0.2283037503416632
Pcbp2	46.85079997158641	48.017914802092534	43.492310820315616	48.760634736322906	45.91830817901165	43.59026611220246
Lrpprc	14.230821756763666	12.8625465754619	13.894737129910594	14.449358954054762	12.694827627516792	13.955359925254799
Top1	19.078025860197666	16.981872028799707	20.900597929639652	18.19827458959606	18.647869324818142	20.416162663657033
Sub1	13.070377243107695	11.239142032284041	13.67660282427889	12.376856551380644	12.642944676627215	13.31773698020784
Hmces	7.259903140752568	4.946184780260028	5.091855603799356	5.390260863884253	6.729725063565904	5.467381696810771
Polr2h	5.728601532224619	5.538396153865863	5.149638413657012	6.412445857808998	5.036310185935697	5.274606906399031
Rbbp8	5.444594473932325	4.471678414983599	5.426439637947158	5.026396378319134	5.180841056019267	5.5022590707123324
Fbh1	29.777786138292605	29.884603173156396	30.4876031668062	30.812690261486697	30.099009714641486	31.48432726377929
Rad51d	2.9844651342136537	3.85650971879728	3.4927171248412794	3.0546125739598864	3.6173683013347224	4.0788687030485224
Setmar	1.350183600032244	1.2784974342377153	1.4478818814018504	1.2008601016442193	1.3848523540482107	1.6765980693517388
Rpa3	13.877972438659933	11.363471503165695	16.083189617853083	14.72514786237283	14.742686563363145	14.166517501365893
Nabp2	26.40597636093332	28.525449452962622	29.859881912057702	30.518295531713946	30.88988404921297	28.579306804941396
Rad51ap2	0.0269300294770487	0.0066845301849165996	0.0820761892926119	0.0612659247963047	0.0133175205590565	0.07467541895571479
Radx	0.0123067769569621	0.0244381154993261	0.0125026920240868	0.0435523764925567	0.0060859877333942	0.0124094511877362
Tdp1	3.277519989578716	3.3743421193112066	3.8121233156941567	3.775259378103296	3.5639370831832813	3.8775819530080393
Sprtn	3.8611581810001	4.700833952627693	4.117403726400143	4.550258116565708	4.48782134491274	4.564642411804722
Ercc4l1	0.8924274850276893	0.9306889453555749	0.8935892045132848	1.0451623321413357	1.0160018459262903	0.8933990199344404
Ten1	1.6749128323248468	1.4351703800505444	1.4218651001888802	1.453803405049437	1.7700287898564704	1.789140011320231
Aptx	3.4200127096798045	2.7456300818659005	2.80936178685758	3.3732902267585985	3.268588707792905	3.379891516509811
LOC100362927	0.1152224899279566	1e-08	0.702340454214395	0.4660118452821926	0.22792061650219939	0.6390107479495112
Nabp1	9.285244705880077	8.748876690338054	10.463994703239218	10.482894636473345	10.187196418373933	12.074315374574832
Ercc5	2.237846065269035	2.18823113678692	2.348105147867851	2.58269543553829	2.4592579145261184	2.746567708183425
Top3a	2.1136607876513143	2.134868091557181	2.126100791563049	2.3323959219747	2.436344196498494	2.641753140326789
Ssbp3	6.2474661732524295	6.124800721437309	6.3223209662837805	7.8532714508394035	7.166956100361401	7.677114443352347
Rnf138	3.5808271744907514	3.0960785326739266	3.4710974826430703	3.8469100916595935	4.367975640849334	4.558510878366071
Pou4f1	0.004202746887681	1e-08	0.0042696515005933	0.025496663927180602	0.012470107080990899	0.0042378099370259
LOC102553881	0.0701923606675743	0.17810196068448308	0.095079694641672	0.1813739345274443	0.3008349409637479	0.2988402814485407
Lonp1	37.622593734955025	38.47507901973393	37.47335304167433	71.1199165335261	67.92097642886017	67.51885495595515
