# Supplementary material for: Peptide-based Self-adaptive Implant Coating Sequentially Regulates Bone Regeneration to Enhance Interfacial Osseointegration
Source: Research Square preprint supplement (doi:10.21203/rs.3.rs-5132912/v1), 2024-10-01
Supplement: Supplementary file 293 [file 9_nucleotidyltransferase activity(GO_0016779).heatmap-data.xls]

id	S1	S2	S3	C1	C2	C3
Mab21l1	3.1802127713755755	3.796924943588195	3.3214238052858565	0.5910209824768771	0.5977194164452555	0.859127950036646
Tut1	17.621387629874636	18.264023380051928	18.730230169867934	7.175677594712621	9.158528295329026	7.0553472464079245
Oasl	0.0837108874628109	0.0593673268948277	0.0364472224459742	0.0120916049684962	1e-08	0.0120584770935376
Tiparp	11.52139359881315	11.356263373983484	12.30505253960626	5.190675799230334	5.523935980512524	6.8344939016592825
Tut4	4.7993113629684805	4.000521009318503	4.767911407157874	2.1826180538908226	2.018038534978485	2.7574827104320647
Parp10	5.698241371986147	5.3106763576827705	6.598365483985473	3.4955701918016535	3.2994669717788883	3.4812951202511817
Rpap1	5.109154060716392	5.183225312838081	4.610490463831988	3.3167635468835623	2.818491658010112	2.8100614221041624
Parp8	6.054368796152367	5.694837538718754	6.6487865288712085	3.8601102733123462	3.630405431465449	3.905145812838825
Nudt5	18.58247653077721	18.821057799980334	18.308841464388774	12.451567138605753	11.222228610065613	12.229050296568142
Parp14	12.331918824250756	11.43461267674793	11.8358041115118	7.8948714272321325	7.9770121951129935	8.833392901791465
Papss2	20.917940993804947	19.346594999988383	20.38708054524984	13.564565019713825	14.251853498059806	14.985010432183573
Parp9	3.533162423573152	3.8074037703358288	3.8667565587327117	2.8406089204834486	2.684422879282256	2.752803035455937
Parp2	10.047085756670874	10.663843258725326	11.24563818464572	8.51908373852379	6.8455077645218285	8.44834757061081
Oas1f	1e-08	1e-08	0.0130098316410724	1e-08	1e-08	1e-08
Parp4	22.64648893257221	22.55993860389212	23.510925830353365	19.407465876931578	18.38734310708449	19.650390684509652
Parp12	5.397062971876334	5.546363931541111	5.487906722835988	4.510761712767322	4.93028260328442	4.6939861356187365
Mocs3	4.914347479380114	4.867332871337492	5.029380778934543	4.346314880674993	4.884399045238808	3.6160643440263773
Tent2	8.060973007589682	6.8954488145853166	8.304843674513505	6.634005854709008	6.700137124725383	7.253759848891299
Parp3	50.091518752149014	50.63969594817146	45.34043820550525	44.264988172549685	43.89437936394157	41.72404820116552
Ctu1	3.979692733494793	3.894610579370701	3.598118063773866	3.3981903547047825	3.9078486477209133	3.4176808643999954
Tut7	11.509395882941517	11.106750598680405	12.172615536207173	10.156002450593586	10.959722369605117	11.68767703011875
Mtpap	5.490480915349601	5.434804222231216	6.153448805153898	5.1555633875598375	5.240810606168976	5.754714619065819
Tnks	10.60226498067078	9.852436775040555	10.624143834219108	9.187528792376675	9.612706933155087	10.659474522133815
Parp1	19.405961682459104	21.474985217532875	20.333957555438715	20.535672783786623	19.524532576109085	19.08170573753049
Parp16	4.9279103855435284	5.959054158066489	5.5078750261590095	5.2979230578279815	4.9253234675377	5.702587590072611
Gmppb	20.154935568969208	22.43393241183753	20.04226150097064	19.81468219363316	20.594296188995468	21.547767451166504
Thg1l	5.7891877123153375	6.818532473607067	5.773597627701593	6.17524390846855	6.293977788660961	6.08702777755306
Parp11	2.0002035216290777	2.000804902795896	2.5894642757529565	2.173736120009556	2.190428910197354	2.308610935626469
Papss1	33.004595666460645	33.986799088833386	32.46361363783053	33.775254424786596	34.64592169754761	34.488256643990916
Mb21d2	1.064531399700486	1.389126592602674	1.5990424519939004	1.3223871591557788	1.6770718908402444	1.2497590561683773
Eif2b3	13.940980767587694	15.218682636604532	15.150683647415326	17.334352840380163	15.65498699438273	15.253960883325075
Parp6	5.940744341606059	6.235017209686527	6.285809854489895	7.471448873677227	6.180501513410317	7.365514189386213
Sirt6	8.527299162214893	9.625919612348762	8.702923701306036	10.209555509674143	10.578755968031528	9.963901874534148
Sirt4	2.195022342118677	1.17470005554026	1.3443054789146331	2.1407131547183957	1.8630374330704926	1.726715416293551
Tnks2	14.016480521310383	13.487483046614813	15.073078746009838	17.353318457687507	16.543519401611324	17.058338419899368
Ctu2	3.281413840842056	3.329788860892315	3.9063935490813457	3.887912853716498	4.760973448295257	3.950141812839078
Yrdc	6.693235344781593	6.316826885827043	5.761539903283374	7.7281830604423245	7.559516892013147	8.781056381640548
Art3	1e-08	1e-08	1e-08	0.0483663898739851	1e-08	0.0120584770935376
