# Supplementary material for: Peptide-based Self-adaptive Implant Coating Sequentially Regulates Bone Regeneration to Enhance Interfacial Osseointegration
Source: Research Square preprint supplement (doi:10.21203/rs.3.rs-5132912/v1), 2024-10-01
Supplement: Supplementary file 297 [file 10_Mismatch repair(rno03430).heatmap-data.xls]

id	S1	S2	S3	C1	C2	C3
Exo1	0.5813349583050732	0.475073088653001	0.4588425372235402	0.2034676420477845	0.2388323962469223	0.2660378052534586
Rpa1	24.73219407314975	26.08167812960536	25.38747117063521	15.179943638339742	13.050255328275787	14.335194193308284
Pold2	9.229697308181544	9.22213489477395	8.733250350323644	4.861791389606382	5.683621969321193	5.073156581863652
Pcna	38.619992709025105	37.71646586305575	35.41914970491197	22.93004206155065	20.652996295704575	21.529353482486098
Pold1	2.8086191418188577	2.846697086673568	2.582528193363021	1.965531600677972	1.575402637110034	1.8290330665107208
Mlh1	3.0881005603426805	3.9113373154092486	4.154750981106127	2.1688153133729364	2.8231385622701937	2.449012195391082
Rfc2	9.390707531510621	10.339237859159946	9.020685090378633	6.753092493125236	7.28007206569239	6.797092750617763
Rfc4	7.7547968629324355	6.716987864386223	6.946018916877165	5.657874135912343	5.534392077575538	4.426813552727879
Pms2	5.476700269600825	5.675755999993454	6.192573106668508	4.544243401002534	3.7794538176255768	4.32899363596814
Rfc5	5.500700999948267	5.32900665465081	5.422578392694733	4.287556928447136	3.871367807106238	4.09640550003508
Msh2	3.97940459607593	4.155406372589544	4.608119883642659	2.867413142645082	3.098887386928366	3.6897511773207152
Rfc1	9.818640779772503	8.479864755946847	9.624069110133071	7.064172333666111	7.368712637700042	7.154271701478227
Ssbp1	12.412456686928948	11.784689830991972	13.529750274991574	10.41459246137026	9.868942907007728	10.0817800678306
Lig1	7.288106599742916	7.036054009034443	7.727769765843312	5.9360368875324685	6.044401926258905	5.8542169256418415
Rpa2	2.416785417131525	2.5117474566096942	2.372354092644646	1.6883354389521803	2.011586677832641	2.240726615302858
Mlh3	1.5605492548130084	1.3285008655505142	1.7511650375069912	1.0889253285887759	1.4231473003494526	1.3521921801581778
Pold4	21.305604510808138	23.652227485111002	20.281324360756823	17.665232813063678	18.701889270102924	21.700847004932804
Msh3	1.9543328930774084	1.859293622559668	2.3940247128605714	2.0650056793809344	1.9080638612890144	2.0340022699019724
Rfc3	6.7865133513944995	5.831085922961267	5.947496314963551	5.994765250916537	6.269611339255384	6.015940758397975
Pold3	1.6486203487563624	2.537506063230429	2.6768588237578435	2.0381819043552265	2.527725465435042	2.6496364248676283
Msh6	5.798971390429723	5.795734321857556	5.590597430185277	5.641736695717559	6.532339128822152	5.924726841958145
Rpa3	13.877972438659933	11.363471503165695	16.083189617853083	14.72514786237283	14.742686563363145	14.166517501365893
