# Supplementary material for: Peptide-based Self-adaptive Implant Coating Sequentially Regulates Bone Regeneration to Enhance Interfacial Osseointegration
Source: Research Square preprint supplement (doi:10.21203/rs.3.rs-5132912/v1), 2024-10-01
Supplement: Supplementary file 301 [file 1_Drug metabolism - cytochrome P450(rno00982).heatmap-data.xls]

id	S1	S2	S3	C1	C2	C3
Gstm3	0.0081228983791406	0.0080650039932596	0.0082522090443715	1e-08	1e-08	1e-08
Adh7	13.968277792847305	12.42841874254763	13.346810741574712	0.4731493783324634	0.5553875748561501	0.3774824581455251
Aldh3a1	256.48413177516	268.6109734930572	245.0680812140824	11.74033943253099	11.197347357430212	10.51090523339905
Gsta1	306.03792153875213	305.6026456078112	307.3784159785956	25.678036869004604	24.28845391676968	26.45302789980771
Fmo2	4.108763950911395	4.161069084891217	4.090689129246234	0.2492655126227445	0.3947648284508844	0.3551179799336311
Fmo3	2.40639781519826	2.1795036330388187	2.780619771006292	0.1857359140932711	0.054504685682159	0.0092613617630738
Ugt1a6	11.95986777662241	13.255842625938866	13.661682188035696	1.7875432661750081	1.681646786003988	1.7729046211086135
Gsta5	2.0317116515686466	1.2452043262262593	2.064055070764603	1e-08	0.0248081056759544	1e-08
Aox3	0.7175218168240938	0.561408332809784	0.7883690618205307	0.11828735208311579	0.127276326946201	0.1179632750454766
Gstp1	500.321704418056	516.810635737434	494.17870100634735	106.72428525443492	104.0905111195828	101.34004741539319
Aox1	23.936221138782944	24.267489818808752	25.96480936744297	5.97336085461032	6.108583963554027	6.482612613067522
Gsta2	0.5231234668357057	0.6287413149745243	0.8671046223774811	0.1113551636633611	0.1633872819867511	0.1110500790474626
Ugt1a7c	3.660502160538111	3.4786520679804966	3.2831468767102447	1.099779707841323	1.034401172460291	1.2022249182832636
Gstm1	45.53356173657048	47.60950914159571	41.930834386865364	17.383676510575278	16.833479050644716	16.562118897759337
Gstt2	8.915766994142976	10.588618807247506	9.458328754669271	3.640612021513944	4.239471827179759	4.166588951125471
Adh1	0.3277715994960561	0.3905225596736176	0.3729482303774112	0.0132565759123048	0.0389017414254169	0.1850834584124377
Fmo4	10.702848509314192	10.271740531132801	12.176528477631841	5.21632530999286	5.4740637716613785	6.1999373982090535
Mgst2	75.23429643871205	72.3663347352602	79.29501471889036	40.535484855496456	38.940315416410634	40.39656830118608
Gstt3	2.7164583350990688	2.5384444997557747	2.2874538954129866	1.3806672833352938	1.5660452938484712	1.3329414829531325
Gstm2	190.81332753780092	209.34083083854833	197.98897462861916	134.8681416964187	122.22953430163864	122.6735895171186
Gstk1	15.442317156866364	17.245510632799856	15.366339812473305	10.889714702697928	11.513611450671727	9.475777362165873
Fmo1	0.2286173029329181	0.3999310109852946	0.1769575104273509	0.16511282405256988	0.0215345776488285	0.0109773731472204
Gstm5	57.71216179150389	55.46675787139734	56.18557516785085	40.29845609223954	41.1352242235911	36.660305605650834
Fmo5	1.4855312932444755	1.369008279802114	1.2757156123551066	0.8547521340468398	0.9903288705921393	1.1503401533218094
Adh5	41.60333182441992	44.57813497728564	42.074851257293574	34.43619992712846	34.613285339565266	30.090005020394663
Ugt1a3	0.0424531155583955	1e-08	1e-08	1e-08	1e-08	1e-08
Gsta3	1e-08	0.0320292436380814	1e-08	1e-08	1e-08	1e-08
Ugt1a1	1e-08	0.0208140493894216	1e-08	1e-08	1e-08	1e-08
Gsta4	15.901209083811368	14.156232477308597	14.978628608764915	13.38656579447718	10.072620361871397	12.276297476840226
Maob	2.963494220101856	2.716036120229004	2.658251285255989	2.1846865115494922	2.3036533983439647	2.5484805606601664
Gsta6	0.4437573084919873	0.523725548151401	0.5699065638758779	0.465620481028729	0.4223341536432639	0.43057426993826997
Gstm6	0.2286746508052204	0.2889661248945785	0.4646299702419197	0.27325519392370007	0.3289740899733238	0.1257722567701727
Gstm7	7.089756423830128	6.436418892801024	5.610881052551473	6.019994090593286	5.578682051036465	4.956837872817468
Mgst1	51.87658773490025	57.53424392368	55.479048761836644	49.45046317094978	46.5257799760386	48.6260027746506
Gsto1	37.64005338831383	38.39298650302365	42.06318219626341	36.79711499758453	36.0373128192774	35.43851973402807
Hpgds	0.0152861427470594	0.0455315609819595	0.0155294872203634	0.027048025859160503	0.0151186945178185	0.0192670894425471
Ugt1a2	0.1270177281503536	0.5359778070531698	0.4516391378508749	0.5137171247992344	0.10468862116719259	0.2561548407040264
Gstm4	8.724759852552545	10.708853470305307	10.236238399082136	10.129926645841307	8.572564630310662	9.270908699893225
Gstt1	2.353354628552995	2.6142899875421732	2.1066637354923627	2.5550451447686897	2.2035652138620483	2.129854389266712
Gsto2	0.409320566576471	0.2477124366352509	0.4079159635853361	0.4927016489039893	0.3007358843516426	0.4795593302362438
Maoa	19.506396974395003	18.8143378095278	20.198019796311065	23.10231861567524	21.9685155594812	24.804203142511984
Ugt1a9	1e-08	1e-08	0.0107967605450372	1e-08	0.1366449606890991	1e-08
Aox2	0.100130473583064	0.11511420202932089	0.032123526867584705	0.1119004148052694	0.0833967331448065	0.3082115303698773
Aldh3b1	2.994735464564537	2.6263025938139037	1.7757254195233532	2.7570264769309545	3.4805562994028048	3.148968995489565
Aldh3b2	1e-08	1e-08	1e-08	0.0104914026545235	1e-08	1e-08
Ugt1a8	1e-08	0.0105518311357054	1e-08	0.0214913547375427	1e-08	0.053581169886006405
Mgst3	6.742804274128404	6.1965325140794745	5.989894209068197	7.895891601215947	8.747170253317192	8.348611823422488
Aox4	1e-08	1e-08	1e-08	0.0049100506147708	0.0048028898847623	0.0097931867207565
