# Supplementary material for: Peptide-based Self-adaptive Implant Coating Sequentially Regulates Bone Regeneration to Enhance Interfacial Osseointegration
Source: Research Square preprint supplement (doi:10.21203/rs.3.rs-5132912/v1), 2024-10-01

antimicrobial humoral immune response mediated by antimic...(GO:0061844)

Heatmap of the Analyzed GeneSet

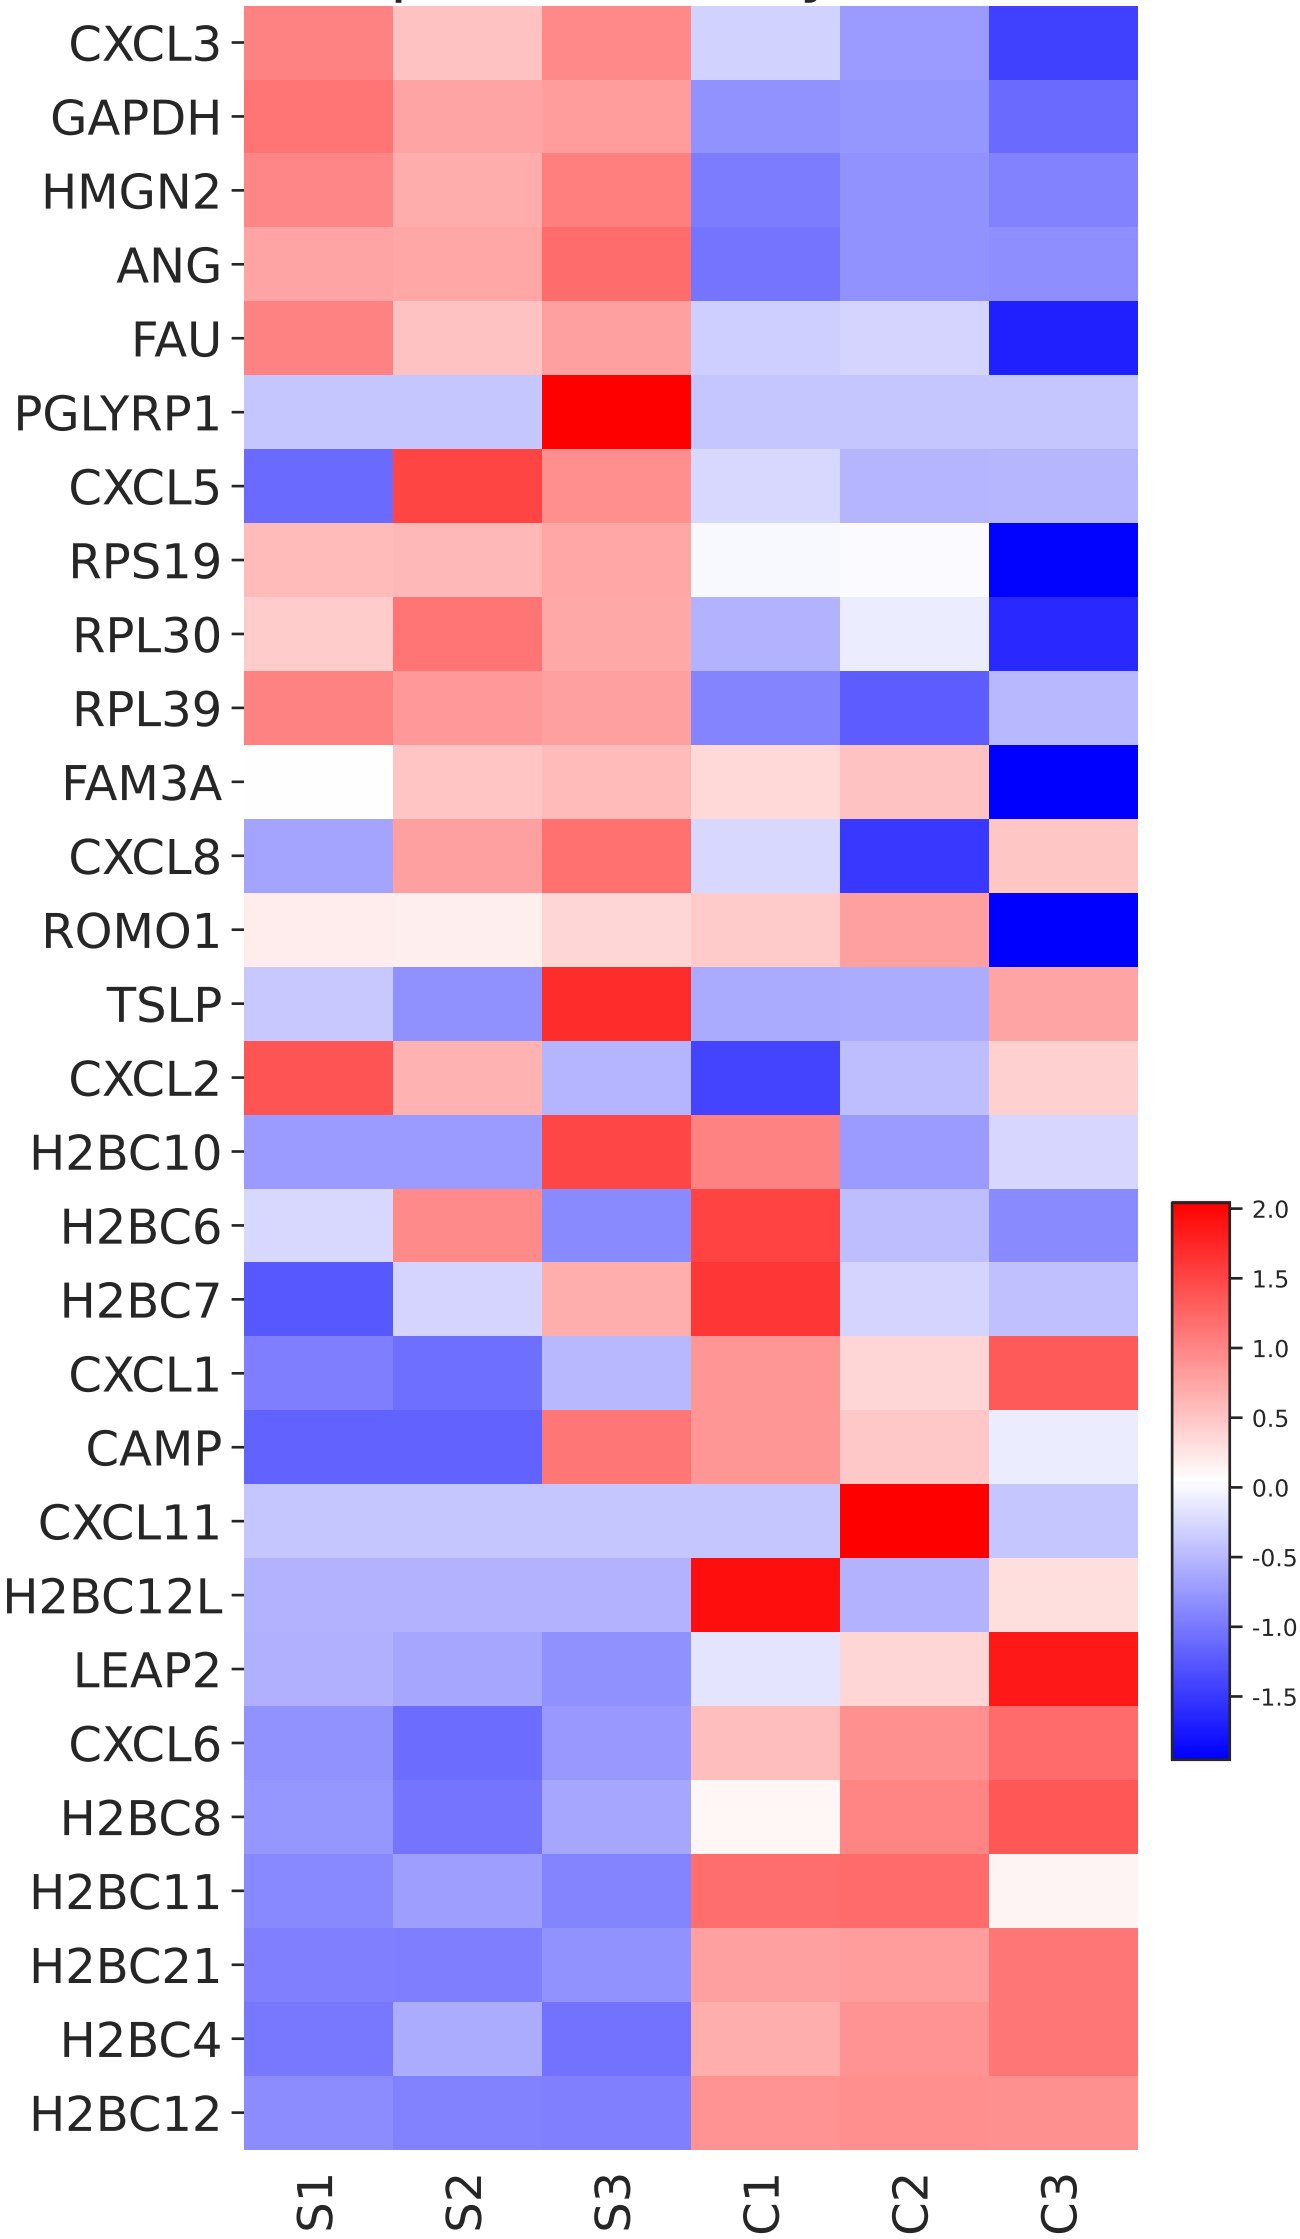

Supplement: Supplementary file 304 [file 1593_antimicrobial humoral immune response mediated by antimic...(GO_0061844).heatmap.pdf › Source data/1.RNA-Seq source data/2.HUVECs/result/1.6.GSEA/S-vs-C/go/BP/1593_antimicrobial humoral immune response mediated by antimic...(GO_0061844).heatmap.pdf]
