# Supplementary material for: Peptide-based Self-adaptive Implant Coating Sequentially Regulates Bone Regeneration to Enhance Interfacial Osseointegration
Source: Research Square preprint supplement (doi:10.21203/rs.3.rs-5132912/v1), 2024-10-01
Supplement: Supplementary file 309 [file 307_Steroid biosynthesis(rno00100).heatmap-data.xls]

id	S1	S2	S3	C1	C2	C3
Soat1	60.413286082283484	60.31855094238828	59.189439943120604	38.52506528654021	36.011488397434164	33.480643970075285
Cyp24a1	1e-08	1e-08	0.0074891632423234	1e-08	1e-08	1e-08
Lbr	4.91108391347772	4.428340293859637	5.246572913519636	3.735176661838858	3.940817462432857	4.478652481615447
Soat2	0.0107971917716347	1e-08	0.0438762712208719	1e-08	0.0106789166658007	0.0108872716713198
Lipa	25.27276005095615	22.738885294172192	25.868615389488678	23.413449676113682	24.409746860034947	22.616524575823888
Cel	0.1263144696882376	0.022802587585210202	0.034997818265290505	0.034832247688102703	0.07950141457163279	0.08105255797111109
Ebp	24.934358607353985	23.96675906072997	25.05479995031484	27.94216854197338	26.483376955049664	23.85465454145981
Cyp2r1	0.0609067483793602	0.0633522962307372	0.1119667037953252	0.0762463731771421	0.09753071049184629	0.105282657529074
Cyp27b1	0.1580364585916358	0.0432855473815452	0.1107257186966307	0.2314239542071694	0.1239662639278073	0.1483649468977032
Hsd17b7	4.894434694332905	5.042204243772034	5.203508394128996	6.285157180375687	6.703410201237251	6.79026557934766
Nsdhl	13.464955115213941	11.864791758407877	13.341454348604104	17.283508480980394	17.140195152305502	17.832305027033172
Dhcr24	20.599505642464322	21.788519480837934	21.16139894951804	29.346087453607588	30.39594303408245	27.91515071716509
Sc5d	12.735867536041681	12.460391359136892	11.935507586133538	17.338674898246055	17.606591374051757	17.647095339785487
Lss	21.772436373303858	21.79292580485641	20.42428954297229	33.61706060211019	33.743331949552434	33.682974838589054
Fdft1	17.014738392143993	17.60790644310298	18.298369745696828	27.76864067155409	27.992892885324263	28.924517915222374
Sqle	16.2609460176641	15.305800312732371	16.61641590103213	27.146359123609614	25.122220863509497	28.10542957789352
Cyp51	35.32915816600301	33.948590776696726	36.32169887669013	66.63149481338355	64.60343555705276	65.5555768631243
Msmo1	35.95991299218881	36.63740222043139	35.520703877908396	69.2089841970295	66.95983245573854	69.0751537940524
Dhcr7	5.4628726182259975	5.501299020539356	4.960552244328873	10.460666501758341	10.609120899260377	9.401900828385816
Tm7sf2	3.3758421151244167	3.696357083766169	3.2212439827401385	11.037588125945954	11.202350965627257	12.327593451061597
