# Supplementary material for: Peptide-based Self-adaptive Implant Coating Sequentially Regulates Bone Regeneration to Enhance Interfacial Osseointegration
Source: Research Square preprint supplement (doi:10.21203/rs.3.rs-5132912/v1), 2024-10-01

transforming growth factor beta receptor signaling pathway(GO:0007179)

Heatmap of the Analyzed GeneSet

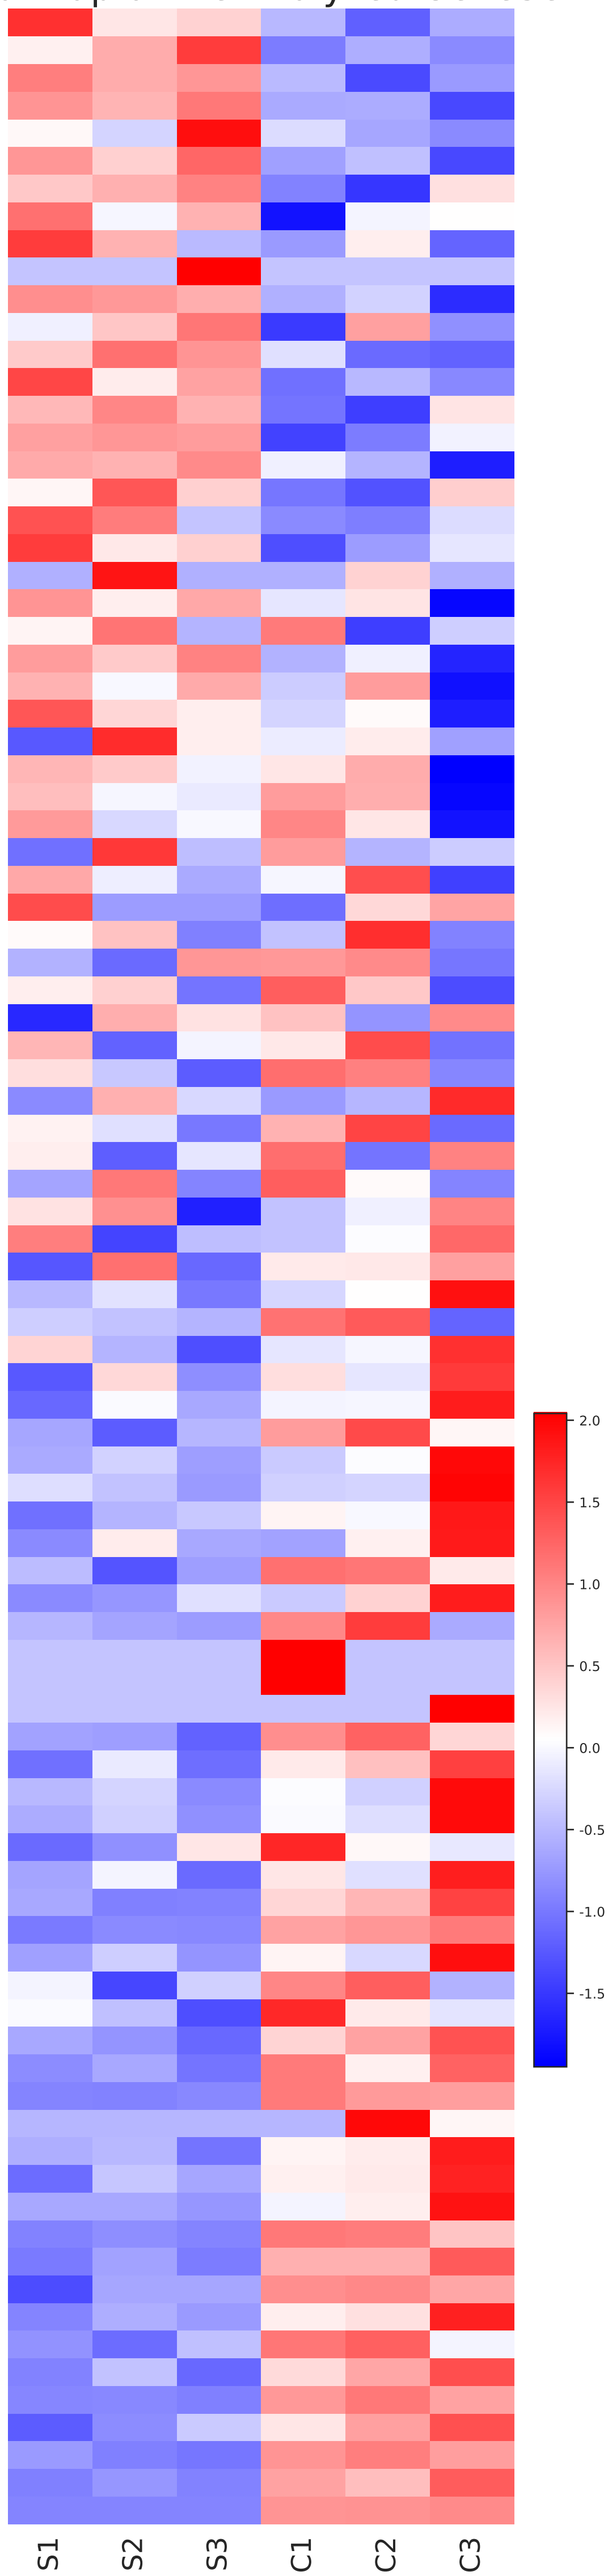

Supplement: Supplementary file 312 [file 1597_transforming growth factor beta receptor signaling pathway(GO_0007179).heatmap.pdf › Source data/1.RNA-Seq source data/2.HUVECs/result/1.6.GSEA/S-vs-C/go/BP/1597_transforming growth factor beta receptor signaling pathway(GO_0007179).heatmap.pdf]
