# Supplementary material for: Peptide-based Self-adaptive Implant Coating Sequentially Regulates Bone Regeneration to Enhance Interfacial Osseointegration
Source: Research Square preprint supplement (doi:10.21203/rs.3.rs-5132912/v1), 2024-10-01
Supplement: Supplementary file 313 [file 308_TNF signaling pathway(rno04668).heatmap-data.xls]

id	S1	S2	S3	C1	C2	C3
Vegfd	43.67780134032935	42.43345432009559	42.169968798237704	9.786070713980765	9.07996499290008	9.467696449635012
Il15	1.7959940007515023	1.9266687145275212	1.97139064657214	0.6053176936016188	0.7656552732334675	0.8326334832416552
Mmp3	7.905552774472604	7.785599568493121	8.799398443385222	3.4461045760214417	3.3328763788639404	3.281625697598449
Csf1	314.4133668817866	303.3538703396101	312.1999899285672	130.93637816846848	132.75040240215893	129.03280395954545
Map2k6	0.22134924565490088	0.2197716198812422	0.2186264985749171	0.0839284269067529	0.0699342314121426	0.1146979195394138
Tnfrsf1b	6.4203802701574775	6.658133533270911	6.586046324573284	3.1398502444423144	2.660931217426964	2.9242975697103635
Il18r1	0.3352992065462745	0.3752797124721448	0.3282501365088002	0.12328197723801569	0.1748574835388591	0.1659746883780948
Pik3r1	16.383475819057892	15.501270229910459	16.875801974644048	7.005672301545564	7.250801604137134	8.172077605732419
Nfkbia	14.182739478986589	16.213418968863294	15.13048073230388	8.286217159675273	8.225008486983109	7.562183511418527
Vegfc	17.761759112015138	18.34794566242823	18.52234762930333	12.202208105495075	10.026153621356357	10.009599281225288
Junb	47.46256013265997	46.16282830337983	44.78167922135118	31.117059196153807	30.162419331744644	27.821619549509965
Ifi47	4.043239220278778	3.2366275620334886	3.36310138468403	2.261270219529994	2.4743494118057607	2.4589234972595846
Creb3l2	26.394103564435706	26.440156547594547	27.05872736651021	18.263746527884585	18.336395112068814	17.89901639611716
Ikbkg	4.84920853755794	4.49047552344489	4.707196828921799	3.665841042859008	3.2179848177390573	3.177709719613544
Casp3	17.781763382308625	15.987098274989131	20.394406860755527	13.01954661222615	11.912954917469607	14.042574722078397
Tnfrsf1a	70.76314114373844	75.62255306813036	71.49014796215587	52.40781262220995	52.02335158892106	53.26495266189544
Irf1	12.77231617765956	12.831536032641939	11.684227809041777	9.649989231811261	9.179946721824845	9.460784546020516
Cxcl10	0.8352105787899504	0.2487773379402304	0.4242532765668964	0.06333693602545669	0.3097730565357274	0.2737080725993457
Cflar	4.261539252298375	3.8713044759906134	4.301935393454956	3.1685083184589016	3.248534992136276	3.1439374801091637
Jun	20.180822618803965	19.29234408498486	18.496194628591486	14.61707348545869	15.940556545850256	16.22842065300743
Map3k14	1.4390236071419664	1.2841895967755161	1.354607488608247	1.068166231381934	1.2114655055342247	1.0652397293688232
Fos	2.5928321149615767	1.9085714488013719	2.2102287018150295	2.0039022246027764	1.7243578144164984	1.7880528838699374
Traf1	2.218908554635109	3.4270346295848078	2.234194398920656	2.1637962174819303	1.960511174489088	2.1877002457121955
Map2k3	38.74617757850106	39.81456566160728	38.74698022721322	34.47637304411815	32.99428020293699	29.86763413773977
Casp7	5.867704800331192	4.719051696019516	4.828590563973965	4.386336409593638	4.162400086246417	4.243612228837436
Socs3	9.021459783076438	9.064284356087262	9.359000303698128	7.871361327662124	7.584651360131551	7.548524331897799
Mapk3	90.68227442303372	100.31036398697587	85.37399712077665	79.47662132913044	81.85347769599866	72.78668334012438
Akt3	4.742749177237127	5.063635765194547	5.086933532029528	4.2546449492524365	3.984150811970837	4.430061904258992
Tradd	15.769757170737503	16.906203504057753	14.519349701127364	13.465026741650984	12.969000337553936	14.141555283520837
Nfkb1	14.957286209322818	15.889074808340112	16.81443894458752	13.333081618706421	14.262562076130212	13.38024868931767
Map2k7	10.043511501020252	9.63887758104423	10.44394873639393	8.539084376752077	8.736529241447121	9.059526337374805
Casp8	2.5572686051830718	2.5442238644771265	2.2692547095236533	2.163534679478793	2.2143891117115557	2.083932758225913
Map3k5	3.758021924304544	3.7730758602554544	3.8022798238510167	3.2962458747495345	3.2205170736443685	3.5885108563347266
Birc2	5.915349691406777	4.765355352586106	5.878504708366563	4.926601983642927	4.963264010639448	5.1449078975529385
Pgam5	12.83744745560429	15.043254058885811	14.807764804642707	12.671343772967937	13.60290891600013	12.920862830495075
Fadd	5.5876172580016465	6.371722133553286	5.283142673897767	5.733619633496077	4.623579860185827	5.550557491537019
Map2k4	6.545038975778897	6.224911064085666	6.942383874657368	6.180126222730732	5.691741911158737	6.417789729504483
Map3k7	11.827166636448508	11.048326984497356	11.776247199526336	10.502593159808812	10.222751614197712	11.543909947406107
Cyld	5.200839161092887	5.144885875744875	5.929594242316825	4.681670206936997	4.689680965369088	5.808655216774554
Mapk1	15.253876836690662	15.382008646431204	16.54507058531675	14.759410907995575	14.620207773677492	14.694649485138859
Dab2ip	6.46107890873715	6.488916383192841	6.431630005573586	6.226526732771543	6.545394259867715	5.729754779227426
Mapk14	25.36185508163248	25.973621599907055	25.642937088349232	25.8743005520766	25.31623295217376	24.20042114771716
Akt2	30.384696455702535	33.62236225131937	32.127570817132394	31.39860405985961	33.08010093665678	31.034163384849855
Rela	24.065276760249372	23.077121747566398	21.341950490318233	22.385707893155132	23.79208909982389	21.875547530616437
Atf2	9.935835239564874	9.037740356375293	10.1925697031345	9.313413331938529	9.556061722351165	10.24891232364405
Ikbkb	9.878555873670317	9.5333369327505	9.841660325915461	10.088287254353101	9.535698955555732	9.7283940354326
Tab3	1.4679505843137084	1.4574880378601713	1.6278738637641752	1.4163098072659945	1.5953080615467659	1.5586658655952121
Rps6ka4	16.275931885614565	15.775885161277056	14.878447919640097	16.61784846212309	15.782589451795161	14.759841826542154
Pik3r2	19.532663833307623	20.95827346985304	18.37146464057553	19.5986826937952	21.12867162822361	18.799340405466985
Mapk9	10.23249110572806	10.210942603663616	10.524431321739188	10.46512770377505	10.427503613191798	10.488638212413484
Chuk	6.866797484197616	6.942124771086577	7.715915167652075	7.155946525810325	7.590585855054838	7.165024106987115
Mlkl	6.852588467609812	5.75634040636468	6.601434842315028	6.498496669407119	6.786291269532073	6.346609160166668
Fas	16.119367698440687	14.881035381879546	16.71517988475305	16.551702687792393	15.23646577199207	17.086181902749143
Vcam1	4.1761918240943094	3.723960664045739	4.370754578063656	4.294306826066092	4.317483751839584	4.258705486548951
Dnm1l	13.815309588871468	12.787420738136337	14.18684774527335	13.33784214058542	14.393016545456268	15.421664774415868
Tab2	11.32648266815755	11.106427314948482	11.13147593889168	11.739025830575981	11.924688708500868	11.984086138156572
Mapk10	0.0228428348864892	0.029160031694207	0.0430977336475274	0.0263962151131451	0.0548677497199168	0.026323896268141602
Cebpb	42.37938331961944	39.877424761441674	45.70816407649957	47.6319337035663	46.87039252653453	42.0827028516872
Pik3ca	7.066312384567878	6.579668634713721	7.182432427650098	7.058149316806675	7.292771667296387	7.9213649609059456
Atf6b	33.69352684389343	35.62280508860083	34.619498005858645	38.107788735797854	38.03466971834331	35.47641896078403
Tab1	5.299374496339478	5.505620609427176	5.235488983021138	5.505813454266771	5.856609619878646	5.963132974906727
Tnfaip3	0.9902791003897344	0.8210402759033462	1.0302440088321674	1.1354768930720713	0.9760655852011049	0.9607953760042038
Ripk1	8.33214189597023	8.36209471300941	8.112846177672216	8.92057821858408	8.267567752168278	9.635592738712575
Xiap	6.213270149314572	5.058045902295283	6.924007904913746	6.368833822926997	5.875053572775857	7.466361497381522
Ripk3	32.04743366861658	31.461504411834824	31.97008390777202	37.03739122304111	33.15331042530242	33.93219299737814
Itch	11.834585898328308	12.060163051955392	13.686715164435142	13.246880574951318	13.597604481667732	14.241524245141067
Nod2	0.07187665240085239	0.09515248321911669	0.08345243051810239	0.0657539566196632	0.1354081760485747	0.0862813226814269
Birc3	0.6848257544656925	0.4255769558303381	0.6957276982633542	0.7522149629090762	0.6432141560651958	0.6209884839181353
Map2k1	44.78033666227869	47.639303452254495	47.620307915801284	55.14271123091328	50.43724744694714	52.250342798556254
Creb1	2.797206192606541	2.358732496266318	2.718903710737916	2.7754265559016043	2.7019255106807107	3.4004677605176656
Mapk11	0.49784527692590197	0.9972658201772242	0.5590096350474403	1.368834571354301	0.5874147195650563	0.7750156154511224
Traf3	2.9326546457093006	3.2988643199290877	3.2600528655091168	3.597716971696015	3.6298535050378473	3.861351154424175
Il1b	0.1261396883686192	1e-08	0.018306829036790703	0.018220221596364203	0.14258048073425258	0.1635326459260579
Ccl5	0.2432693897109085	0.2415355321611484	1e-08	0.409954770918196	0.1203022821820256	0.3270652818521159
Creb5	0.0434497508153412	0.0534561723165011	0.0422222474912674	0.052528121220250704	0.0476448543522878	0.0761952065699839
Akt1	61.57859818639162	63.3092303899666	59.0859707101178	80.96951892952251	76.30325699048791	72.16469118200062
Traf2	3.5968370605634865	3.8792601637100725	3.794189318255997	4.897492081272966	4.637169466823687	4.594390090622941
Lta	1e-08	1e-08	1e-08	1e-08	1e-08	0.0110077392970052
Creb3l4	1e-08	1e-08	1e-08	0.0148060446553015	1e-08	1e-08
Bag4	6.7199231164810715	5.381683049960046	5.678348851315242	7.7881526246483315	7.942133058530457	7.212803579925668
Pik3cb	0.9096405776733855	0.8575432789534603	1.0828089292331358	1.0776862856555016	1.3267951122284614	1.3897418519793052
Icam1	21.883412058759053	23.195413799797212	19.98244748224394	28.67905455895089	30.50487911524929	28.274127251354276
Cx3cl1	2.2622502926619514	2.0508111729633924	2.2649555549672193	3.169196670754258	3.0676024515568456	2.6117217252743736
Tnf	0.070178491402475	0.0278713288978681	1e-08	0.0851500682250953	0.1388194665388322	0.056611189241741404
Mapk8	2.6659496772435154	2.675410426577563	3.4489325277603538	3.830120415534581	3.97334561948756	4.666138763905404
Map3k8	0.4398062982189852	0.3540581047342135	0.5977562502660541	0.7091064980621166	0.693630379863433	0.773085769295024
Csf2	1e-08	1e-08	1e-08	0.2171551849444231	0.0531039608346961	0.487260517044989
Bcl3	2.258670891636593	2.2103825946702265	2.887497561972713	4.491053480316252	4.189952629212957	3.5415899573717255
Mapk13	0.2260264646183864	0.17798471121069478	0.1662799193157352	0.2679414758588446	0.3623059971463945	0.3379387487570085
Pik3cd	1.9560092775532383	1.958118333142459	1.7900750831274208	3.2117950974844507	3.6613175664738877	2.87291590279214
Creb3l1	25.020482548368438	24.737628491881825	24.474053344044442	40.91053845739372	45.362618623942936	40.66576177117263
Mmp14	159.69256782534765	160.07174733401285	154.363771173037	276.6165730231205	280.77737829278766	272.6206613470732
Traf5	1.151887069828991	1.187199807157536	1.0168333791345245	1.945250740198693	2.0906669988009523	2.087257041618204
Jag1	3.7039500799412326	3.3500977023751277	3.5610228345875656	6.609524925386538	6.235266777194389	6.932498873982581
Ptgs2	7.521698256981188	7.328598579561964	8.223329540142826	13.910245916843278	14.178500391086704	16.155098769934103
Mapk12	0.4785895931267326	0.178191956617118	0.316035465064638	0.9073278790357244	0.6745194704000792	0.9531002741592485
Atf4	126.0296806965624	119.8046358390526	126.3036749527566	247.4454294234383	254.87872357626424	248.80839490449316
Pik3r3	5.6630445400355	4.95810393301635	5.538457950367612	10.476848710488392	11.306549137355438	10.949904437798812
Cxcl1	62.27904712707263	55.91370437344116	61.69774748365794	120.06603887177532	121.1605057650627	129.947624751638
Rps6ka5	2.149820511547935	2.2544136841576807	2.450914701565937	4.927486859365335	4.772164001880308	4.770890536961922
Ccl2	134.9051384899577	123.15338886330427	140.0133684370735	309.67225801201914	308.1979697475727	325.9041901470409
Lif	1.5227018297450312	1.511849053907251	1.366675198197251	3.917904366453061	3.5711898023210815	3.665832848728674
Edn1	2.7596198512097883	3.027476909836668	3.0977508577463317	7.44076740011006	7.598487697383847	7.557796076107888
Cxcl3	32.70067469547253	31.103421525281657	34.36119114789618	86.75848024885111	85.56710472739414	89.77657033703572
Cxcl2	0.2788196251517538	0.5110751728337344	0.3922037091468971	1.3228467856295119	1.803081166737848	1.2327161297252303
Cxcl6	42.01055793925988	44.28991513293109	46.829427988508044	244.71688440308	238.05415328611716	280.86442863633494
Il6	2.7416885981804846	1.3048311434357924	1.5883311629087737	24.74322171395451	22.43278580944411	26.091984175764107
Mmp9	0.4997413287227106	0.5434347057568754	0.4109926970792275	5.077011613958169	5.405555238533193	4.535195543410697
Ccl20	1.2172401865706168	1.409991952505798	1.8843699655911303	19.018288096189842	22.444251582916866	23.9634359623472
Ccl12	1e-08	0.0435360423895403	1e-08	13.655441261088475	15.178879290250643	12.468454984717885
