# Supplementary material for: Peptide-based Self-adaptive Implant Coating Sequentially Regulates Bone Regeneration to Enhance Interfacial Osseointegration
Source: Research Square preprint supplement (doi:10.21203/rs.3.rs-5132912/v1), 2024-10-01
Supplement: Supplementary file 317 [file 309_Neutrophil extracellular trap formation(rno04613).heatmap-data.xls]

id	S1	S2	S3	C1	C2	C3
Tlr7	1.4421128040109863	1.7687366236941775	1.998312692382728	0.3752564055740227	0.34084746872739907	0.6522264567342017
Hdac9	0.08468055355847129	0.07719798147166679	0.0555275597502553	0.0295783832827121	0.025887279614911003	0.0349310659215228
Pik3r1	16.383475819057892	15.501270229910459	16.875801974644048	7.005672301545564	7.250801604137134	8.172077605732419
Casp1	11.571660052734654	12.692982706221555	13.204978772241011	6.309845878349342	6.260308009191153	6.903835627890447
Cr1l	25.566783044178592	24.26797907468978	24.334759280942603	12.599199650640697	12.427473849344972	13.885264455046764
Hdac7	15.915809018304849	16.60983028004378	15.74548466813338	9.171722375799959	9.920266989310065	8.252961438219067
Hat1	12.552841116458305	12.653318957572806	12.184559099303645	6.800000397317308	6.5205974981971675	8.072353071399148
Gsdmd	34.78232057794949	37.65855633882414	31.966580284575898	22.43043601651563	22.02500666422223	22.099476552200535
Itgb3	7.497756414583288	7.451197686924488	7.201764393749754	4.617311963992778	4.811245929609863	4.835244163608864
Hdac10	4.383283158904336	3.9726873582127373	4.113421624420378	2.9832799447642744	2.802703236774077	2.691508238852049
Atg7	1.7346173733381998	1.6886343396177008	1.702812638277402	1.2543379311078948	1.2467519508817415	1.0739748717317659
Hmgb1	16.85098915596664	14.831637555069126	18.39136220417084	11.611208731408807	11.388913494487065	12.182160122355187
H2aj	51.16448282897826	51.236075406498614	44.73763818182971	34.40644650942884	38.001296719990684	31.2600220238244
LOC690521	0.06399519817620289	0.031769547149124	0.09752092978787709	0.032353196537327905	0.031647094213649904	0.0322645570881141
H2ac4	0.2349029824721735	0.0466457589887932	0.3340994574214309	0.047502704519092505	1e-08	0.0947451085920812
Vdac1	142.1875774596316	137.46900865363858	143.6768531659234	103.94960338755803	99.99143885321256	100.84264498050564
Hdac5	18.05982640469634	20.004607186423186	18.21691867107045	13.867617322034137	14.399951218523732	13.147601126802542
C5	0.0129625389918951	0.0085801039745809	0.0263377766580398	0.0043688709557705	0.0085470327438324	0.0087137927902206
Prkca	9.316841770358932	9.24258726021399	9.066203536910672	6.635572306714202	6.949536254440923	7.6485364330296575
Clcn4	0.3587071019671073	0.4266753296839005	0.4113226835315891	0.3124191114359037	0.2564235122080954	0.3581185767497295
Hist2h2be	0.46427882618029587	0.30731317980852	0.3537523660932797	0.1858193738540973	0.2774291060886147	0.3511141989000656
Rac1	314.18486117310005	300.69546008230236	316.63515813440154	242.0435022918744	248.6773534130673	238.12457893963392
H2bc8	0.2207024565730568	0.4382588713381157	0.3523392408359164	0.06375861995372209	0.2806519152768428	0.2543357207345349
Hist1h2an	0.19504300526519838	0.5034974521327399	0.3962958949150416	0.3549789594869915	0.1157438764815535	0.078668098452074
RGD1564447	1e-08	0.0850251727137496	1e-08	1e-08	1e-08	1e-08
Fpr2	1e-08	0.0648089899871861	1e-08	1e-08	1e-08	1e-08
LOC108350839	0.021584531080396603	1e-08	1e-08	1e-08	1e-08	1e-08
Fgb	0.0134535438779517	1e-08	1e-08	1e-08	1e-08	1e-08
Slc25a5	148.10726376559532	144.36766021533518	143.2885710201033	117.41241005284105	117.11372730243667	114.26543126500772
H2az1	43.97383645679088	43.72990714476271	43.08599140869519	33.80095180104754	33.524707289015524	37.73076534173198
Clcn5	8.026027876332687	7.410928331461885	8.05024788747109	6.294515997374961	6.591396026684054	6.061176515956983
Hist1h2bg	1e-08	0.1698309722626031	0.2978967309206567	0.024707293836555802	0.09667221771145919	0.0492791944070267
Slc25a4	424.18888027221607	435.87263163538256	418.9513833709649	340.46838233572674	348.72290085372254	344.16267233292785
LOC108349691	0.0425867359445954	0.2536991915505588	1e-08	1e-08	1e-08	0.042942033102885704
Tlr8	1.455703784622889	1.6968888677666358	1.6145973395619344	1.1691208013313783	1.3121841710142188	1.3935271410430619
H2ac20	0.049432618820866504	1e-08	0.2008781746291693	1e-08	1e-08	0.049845030553662704
Hdac1	71.83571308186053	72.10736589458644	75.25315793427309	60.52041801455754	58.13931501861888	60.92477508017597
Hdac11	0.9144691817316727	1.0295521138878192	0.7382445820953549	1.023699457125934	0.5329805593085054	0.37871903857910527
Mapk3	90.68227442303372	100.31036398697587	85.37399712077665	79.47662132913044	81.85347769599866	72.78668334012438
Akt3	4.742749177237127	5.063635765194547	5.086933532029528	4.2546449492524365	3.984150811970837	4.430061904258992
H2ax	23.625834193546428	26.64751930400493	23.274609302933666	20.30424908320505	21.69178905980446	20.68880804327083
Hist1h4b	11.126570806098622	11.46448853924562	11.13664825738103	9.255108325469864	10.823986544369207	8.769185246355962
LOC108349189	0.19121039728286748	0.4429776746903431	0.2913814930808711	0.1933353373563067	0.0630386165090201	0.3534770130918561
Nfkb1	14.957286209322818	15.889074808340112	16.81443894458752	13.333081618706421	14.262562076130212	13.38024868931767
H2bc12	0.4592758216955945	1.1653394976682991	0.3110581162199529	0.1031955187828562	0.6056597251233016	0.4631075177733624
LOC108348989	0.1399008645063225	0.24308154978207158	0.4619159373064392	0.0353639066582313	0.08648022535487809	0.3703036006567899
Hist2h2aa2	1.0947122186990879	1.0466539393649763	1.2357102949833743	1.02488691229549	0.6817128856981454	1.2264947794454348
RGD1564548	0.0050261657260019	1e-08	0.0051061785872093	1e-08	1e-08	0.0050680984833802
Plcb3	15.340610270499736	16.351003722091587	14.979440459613775	14.276180021203025	14.427331737582184	13.089957608161185
LOC100363171	1e-08	0.1433503605509254	0.09778521412334559	0.0486613068244362	0.09519855600854059	1e-08
Cyba	123.71700140410675	135.02781530916945	122.20572797570252	115.0762983140458	121.69074655405771	106.55158667591964
Mtor	10.645913808475285	10.718639472123396	10.100182579220231	9.231280985761327	9.63015253996474	9.655948452020533
Vdac3	82.9660650893512	81.30840011837468	88.36137165489005	75.70966660381448	75.53448008773042	78.92031697529669
Hdac8	2.158987404503151	2.5337435172577525	2.2740940298903443	1.8928092227451052	2.2707063320981757	2.2304229425838957
Itgal	0.11632891392011879	0.1522497347030374	0.1181807881856959	0.1657396480451768	0.0732165782120174	0.1066358512023424
Hist3h2ba	1e-08	0.22389960514620738	0.0381828039910206	1e-08	0.1486910723371491	1e-08
Map3k7	11.827166636448508	11.048326984497356	11.776247199526336	10.502593159808812	10.222751614197712	11.543909947406107
Mapk1	15.253876836690662	15.382008646431204	16.54507058531675	14.759410907995575	14.620207773677492	14.694649485138859
H2az2	11.739090664554261	11.550889528380932	10.728023885049382	11.156310914147857	10.225568332087672	10.764795720554615
Tlr4	2.4450720754571407	2.7372580057338647	2.4983958778171287	2.4077510727480425	2.2780975117607967	2.601250654613716
LOC100365043	1e-08	0.0527117980949591	0.3775473676242178	1e-08	0.2625430853150336	0.0535331150340907
RGD1563668	0.25223137751206487	0.2191294406690578	0.16015420583450748	0.3506723647454715	0.09355064509228089	0.1271678653672674
H2ac25	5.321119552300765	5.3588847180389765	5.684638644039851	5.041097291585709	5.549345775010409	5.1041557914603235
Fgg	0.0106562744577835	1e-08	0.1623885803038458	0.1077468958578877	0.010539542996445	0.0107451786972117
Hist1h2ail1	0.4149523802115241	0.7724903985110113	0.5796424248034464	0.5769002036776542	0.7438624713635584	0.3399616123961205
H2bc9	0.1552670239357055	0.1331385173969251	0.0860393311839392	0.1355844519418272	0.0767830995675442	0.1423294576614275
H3f3b	131.9337282647746	119.42974251667567	125.6632301002194	116.63664615114537	120.47802987644971	130.59080291107318
Mapk14	25.36185508163248	25.973621599907055	25.642937088349232	25.8743005520766	25.31623295217376	24.20042114771716
Ager	0.13903829317789249	0.41414195052293207	0.7768842212676843	0.2530501830341795	0.6738245981309152	0.3224560237637713
RGD1560813	2.152565430472281	3.668900194100353	3.7176156794893758	3.373555006210464	3.619275640979245	2.3514010932398333
LOC102549061	0.5253487813989404	0.521604455110816	0.266855987021238	0.5311870346065247	0.22268313822283028	0.5297317181344889
Vdac2	71.60172641253247	70.35320888080788	72.95921132534906	69.78542735010603	69.98233083285102	73.26645030135121
Akt2	30.384696455702535	33.62236225131937	32.127570817132394	31.39860405985961	33.08010093665678	31.034163384849855
Rela	24.065276760249372	23.077121747566398	21.341950490318233	22.385707893155132	23.79208909982389	21.875547530616437
H3f3a	151.5709068063814	146.88038570154882	159.0630978075845	149.3161662720652	152.4793545180744	153.14098896685533
H2ac12	0.2032465303879407	1e-08	1e-08	0.0513763148017653	0.0502550364336931	0.1024711037562423
Hdac3	24.92507884858727	26.91087696342415	25.002116940347324	26.499509289883967	25.23871146529493	25.18185219591861
H3c1	0.3614995462625205	0.3589230251198745	1e-08	0.2284480828780787	0.2681546930316908	0.22782219363744718
Pik3r2	19.532663833307623	20.95827346985304	18.37146464057553	19.5986826937952	21.12867162822361	18.799340405466985
H2ac21	0.1636743392064177	0.0541692668902114	0.0554266464385784	0.0551644294415268	0.2158418746829584	0.0550132930534665
Macroh2a1	18.48894363605945	17.435896639273963	17.06089254711992	18.27743735076852	17.742577208909605	19.705880428925408
LOC100910554	0.08179006051880859	0.3654319917153126	0.0415460552752038	0.4548444632190831	0.16178821254301198	0.0412362187136519
Plcg1	23.28142951676821	24.12788633145028	23.22082302283229	25.298905824112946	25.29892086182227	24.33169333432177
Hist1h2bo	0.8800754296975168	0.08321932854991769	0.12772652441244078	0.2542445201340458	0.3730435159520512	0.8029018366528935
H2ac18	4.178509355622664	5.650172146336645	4.1237417610302325	5.794211030870018	4.2114556873727835	4.855407650789479
Pik3ca	7.066312384567878	6.579668634713721	7.182432427650098	7.058149316806675	7.292771667296387	7.9213649609059456
Plcb4	2.1921025969426524	2.128201997176332	2.457520513330578	2.4745730956295837	2.1801124201957003	2.643480676507436
Actb	4024.870591861198	4373.085949730487	3911.985913364068	4588.973979297553	4562.296785633169	4186.84035351396
H4cl3	0.27181630671780077	0.2698789862923036	0.12273041925685209	0.21376213533591648	0.41819362282323197	0.1827227001418709
Hdac2	35.90762977128487	37.23407210666978	41.19336045031269	42.182392742954185	41.40116767949997	42.09962016516593
Itga2b	0.1153160146681579	0.1081333372012933	0.1301686258784795	0.0582987714552499	0.1964242826896999	0.1679572302314166
Map2k1	44.78033666227869	47.639303452254495	47.620307915801284	55.14271123091328	50.43724744694714	52.250342798556254
Mapk11	0.49784527692590197	0.9972658201772242	0.5590096350474403	1.368834571354301	0.5874147195650563	0.7750156154511224
Mpo	0.0651395412935215	0.0485064559910972	1e-08	0.0329317266954919	0.2093844323764188	0.016420756110869603
Hist1h2bd	0.7438184275453956	1.0462324114030896	2.3299500831169944	2.9456644805975514	1.2874232787961277	1.8125580741647367
H4cl1	0.5572683873460902	0.6436306905715905	0.6585706786923883	0.66695426849285	0.7423840604297145	0.7568686362168562
LOC689408	1e-08	1e-08	0.0337379626147868	1e-08	1e-08	0.1674317410322893
Hdac1l	1.1004869790870284	1.7505793033845152	1.683019715151436	1.890422083935221	1.6033890142877743	1.8971747278348372
Actg1	1004.9900081797816	1030.0562814238456	961.6641816116764	1195.4489166139979	1173.9654500667714	1149.816226584511
Hist1h4m	0.0584647498152965	0.2321921827442151	1e-08	0.1182289385808525	1e-08	1.0021926084406811
Aqp9	0.004762322877151	1e-08	1e-08	0.0048152469343569	0.0094203005543447	1e-08
Hdac6	8.343912736074396	8.090881286966512	7.7184753175426675	9.51233915973998	9.839109014970212	9.34586514818401
Fcgr2a	4.526229638868598	4.653486448193169	4.474462427033856	5.450384046173802	5.3807447821982155	5.41310626526512
LOC100361457	118.94461495838262	112.93088490001708	108.27946144235443	125.7014575093517	137.33782386924267	146.6778156252665
Raf1	22.056806721073112	22.496358092562122	22.123931305127766	27.12835700717631	26.916461635349847	26.292939395318143
Hist1h2af	1.0242486960771413	0.2991025225998954	0.5508815416261762	1.2793092181172405	1.132208671689361	0.5467732507298733
Macroh2a2	9.224966758418692	8.691665833816952	8.684881923184532	10.365228451581658	10.55698961183645	11.371730945961739
LOC100910200	0.8546278945611818	1.3975898395750526	0.9193054958984597	0.9149563681257065	1.6905321518586702	1.824899233837284
Akt1	61.57859818639162	63.3092303899666	59.0859707101178	80.96951892952251	76.30325699048791	72.16469118200062
LOC498276	8.92883701007357	7.649808275993839	7.473802955459845	10.108034092787463	10.718304426241863	9.196949468872475
H3f4	1e-08	1e-08	1e-08	0.08535244507173849	1e-08	1e-08
Ppif	4.257296063822956	4.923529491144379	3.968696476339421	4.578683971403927	6.260794892347537	5.820220127147485
Hist2h4	0.2391739456080312	0.23746927757931088	1e-08	0.1209159596849628	1.005354351938679	0.4220463582738162
Clcn3	2.493469456338932	2.6304288201092896	2.681591296749058	3.1908679672973004	3.220773195939297	3.650278057772244
Map2k2	35.87197454734145	40.366143081387946	36.841650739806425	51.92634889593364	50.49454657605205	44.29722847678789
LOC684797	1e-08	0.0545463150820226	0.0558124466922111	0.1666451935565381	0.4346884985030346	1e-08
LOC100359421	0.023725680967129303	0.023556580631615	0.1687235786376765	0.3118613872435816	0.2581235225241592	0.0717708462080294
Hist1h2bc	0.3541438165681353	0.5478725845577632	0.40998361017488977	0.4246988830152192	1.09152170413062	0.7141968018913336
Pik3cb	0.9096405776733855	0.8575432789534603	1.0828089292331358	1.0776862856555016	1.3267951122284614	1.3897418519793052
Prkcg	0.021279021121271703	0.1267641034101196	0.0972799209993652	0.1559872899575503	0.1631058540487824	0.10728270982118379
Camp	1e-08	0.2407111788431923	0.041049771457923205	0.1225666893734947	0.3996389574078668	0.7741289042984383
Hist1h2ac	0.0502722385035989	0.7487088472723497	0.4596527529492298	0.8132945505561834	0.9447091480974923	0.6589913963856858
Hist2h3c2	0.3334960610590858	1e-08	0.338805083441451	0.5058033488230137	0.3298428595507182	0.6725567662029427
Rac2	1.2130558391018111	1.7675107860543917	1.5684668769365377	2.405286146846986	2.02558184722763	1.7632800484681939
Ncf2	1.563523138136023	1.1887590145686502	1.273592668582111	1.8372606803470088	1.838957288994248	1.903243608606424
Hist1h2bq	105.81594250784234	107.93541232344856	110.0859439624676	146.47368258791056	148.63191495406986	160.8909548941755
Hist1h3b	0.2002386537648633	1e-08	0.1017131610120212	0.1518479468136742	0.3465790717900781	0.353341138787381
H2bc6	0.8675209876472341	0.506669352464478	1.088703381769835	1.0835528522199904	1.665564226589079	3.0359270054031535
Src	13.907358164387732	13.97566828767456	12.093084323871652	19.548264281188327	19.396334849918585	17.654262662612435
Vwf	0.0322774876215314	0.032047435864389504	0.019128275534522402	0.0462345989628064	0.0798097645771929	0.0379712366082997
Ncf4	0.4744269970257669	0.160583736026993	0.3833928185163961	0.5996241867164143	0.5225515917791206	0.9350254092202113
Hdac4	2.19009538313418	2.248589767991684	2.4524321240509286	3.5610176062184986	3.0819122772363006	3.391336978753432
H2ac23	0.3630391524646608	0.4005018411814613	0.1639193300295947	0.9380770710993542	0.5984372072257494	0.4474163869970172
Hist1h2ai	0.1940837774196319	0.4335760702728812	0.4436402598546869	0.5396617690447728	0.7678309056754424	1.1252922055731611
Itgam	1.4073236132805402	2.1483382502030226	1.6978010652470932	2.8281396296002983	2.8360113754163905	2.5661421454182114
Hist1h2ao	0.908371606874492	2.284806620315518	1.66109802991627	3.3064791251703913	3.713473727959748	2.6257235096004905
Hist1h2ah	0.237733138767019	0.23603873982280899	0.4347318211025848	1.7307005910329623	0.5172836756608653	1.534185702864544
Mapk13	0.2260264646183864	0.17798471121069478	0.1662799193157352	0.2679414758588446	0.3623059971463945	0.3379387487570085
Syk	0.5559910455341377	0.5751903492549122	0.4581935378922481	0.9356392896312299	0.8267735893746656	0.9487578248669096
Pik3cd	1.9560092775532383	1.958118333142459	1.7900750831274208	3.2117950974844507	3.6613175664738877	2.87291590279214
LOC103690190	0.6591367447484716	0.9061461231184841	0.875669653776941	1.4867224577324556	1.5044224287216912	1.3292717144439314
Plcg2	0.5901699546190872	0.45160254315328857	0.40862076614140397	0.8931924435356917	0.8476736166878912	0.8300988353849464
Prkcb	0.030140949376508002	0.0374076542511166	0.0535863433511407	0.1676174525037758	0.0819796213819171	0.2051487267138603
Plcb1	0.3213051226099584	0.2701862425808913	0.1798641268062203	0.5304094929714239	0.554503199752876	0.4793666539427648
Selplg	1.0022882839074059	1.2823340549282787	0.9635731890404449	2.1832886264991105	2.7477221342544627	1.6957219450287258
Fcgr3a	0.16135073998429358	0.2002509255907306	0.1639193300295947	0.876898132332005	0.7580204598192826	0.3660679548157413
Mapk12	0.4785895931267326	0.178191956617118	0.316035465064638	0.9073278790357244	0.6745194704000792	0.9531002741592485
H2bc18	0.5174109817602893	0.4395776111937818	0.4931335039187239	0.8359789457583939	1.0709675681379818	0.9466399317742704
Pik3r3	5.6630445400355	4.95810393301635	5.538457950367612	10.476848710488392	11.306549137355438	10.949904437798812
hist1h2ail2	0.051362742375694305	1e-08	0.052180400920483705	0.6751359199546517	0.5080009279631452	0.2589562447636059
Plcb2	0.0135873586755136	0.0494652036484065	0.07361947507832599	0.4442065382420422	0.3270037378541263	0.2237782191459484
H3c13	0.20151677276761779	0.2000804992795896	0.4606307375086962	1.3244155610174229	2.042920297323704	1.3715865011074904
Ncf1	1.7582836455342892	1.4547931715316693	1.0972827779102723	5.130291018061996	4.943793809118208	4.6856610740341145
Selp	0.0356922313222717	1e-08	0.06526875945103619	0.3464531863056638	0.2965304222279896	0.2303359988593737
Cybb	3.71226325632296	3.2873394048373252	3.731720956622424	13.334569952800187	13.501116967869429	13.758915344524604
Fcgr1a	2.052924268466584	1.8137347906663754	2.2977008387028603	8.12704439896522	7.5194960371933375	8.38546334284918
Itgb2	2.8256154879372497	3.3781705898655345	2.8112567849725583	12.564968058114014	11.481948602593457	12.037272758044807
C5ar1	0.8965602191806372	1.1015055094117419	0.7797777450876655	3.9130522634932134	4.127483251572143	3.375516750577804
Tlr2	1.167378749002209	1.4873467078791947	1.4807394247329988	7.307265458359606	6.560479348470582	7.7431235192170655
Casp4	3.97938140708602	4.201309903713055	5.524455055423265	22.812563980449568	23.116089233494364	26.19979367663881
Clec7a	0.1373374293921149	0.07437741308046959	0.1522077202937602	1.2055890912512328	1.0866639298486092	1.34706399019345
C3	0.8214797367956509	0.9824571335865516	0.635401442825146	11.510540568596815	11.47629451084744	10.895406202913133
