# Supplementary material for: Peptide-based Self-adaptive Implant Coating Sequentially Regulates Bone Regeneration to Enhance Interfacial Osseointegration
Source: Research Square preprint supplement (doi:10.21203/rs.3.rs-5132912/v1), 2024-10-01
Supplement: Supplementary file 321 [file 310_Viral protein interaction with cytokine and cytokine rece...(rno04061).heatmap-data.xls]

id	S1	S2	S3	C1	C2	C3
Il20rb	22.07196135654455	21.306101621309583	21.607417054659802	5.769860173782905	6.619428811605457	6.187382092764977
Cxcl14	2.177811568119796	2.4960658670003117	2.063992151847951	0.4285798761055906	0.7661720117650325	0.5453106885633119
Csf1	314.4133668817866	303.3538703396101	312.1999899285672	130.93637816846848	132.75040240215893	129.03280395954545
Tnfrsf1b	6.4203802701574775	6.658133533270911	6.586046324573284	3.1398502444423144	2.660931217426964	2.9242975697103635
Il18r1	0.3352992065462745	0.3752797124721448	0.3282501365088002	0.12328197723801569	0.1748574835388591	0.1659746883780948
Ackr4	59.20734101503216	62.2743049856878	59.65871408740451	31.989374320229864	31.60610692337336	31.83038969655993
Ccr1	3.3935793505498646	3.801691621473868	3.642750069500296	2.149413441176506	2.0138431298367	1.7432278380706339
Il6r	2.1167282935407847	1.9144509456963987	2.0111263254228153	0.8145087525032678	1.1781466195606363	1.2789045330149331
Il18rap	4.370737330624477	4.2881426938450335	4.511752472833953	2.4772083596258505	2.3352956334680264	2.7465712707174874
Tnfsf10	0.0522986728938599	0.06490740229804459	0.019924217797633603	0.0066099928927726	0.0129314524727228	0.0131837564633928
Cxcr2	0.1436131692127071	0.1960606865685137	1e-08	1e-08	1e-08	1e-08
Il6st	181.5882721319365	169.37954875005474	177.35288781481427	119.63915924320472	116.70015837063764	122.05612383116744
Tnfrsf1a	70.76314114373844	75.62255306813036	71.49014796215587	52.40781262220995	52.02335158892106	53.26495266189544
Cxcl10	0.8352105787899504	0.2487773379402304	0.4242532765668964	0.06333693602545669	0.3097730565357274	0.2737080725993457
Il10rb	19.904385744216068	18.360923685890796	17.544204697328876	13.854776362455715	15.63738279792117	15.059951842010925
Ccr7	1e-08	0.09674674864342289	0.019798495773121802	0.019704831430142	1e-08	1e-08
Ccl17	1e-08	0.1551779472300447	0.0396949938520512	1e-08	0.038644964320298604	1e-08
Il2ra	0.0169453007623056	1e-08	0.0114767085755453	1e-08	1e-08	0.0113911191818723
Tnfrsf10b	4.889904315898924	4.252817747027582	4.678660203491765	4.353662524747952	3.8957340578561417	4.024599207499677
Ackr3	26.568518744373844	28.07890135058917	28.25634313501702	25.447527989895622	24.48533420831498	23.730044224693827
Ccr10	1e-08	0.0134956802011204	0.0138089423848122	1e-08	1e-08	0.0137059599685444
Il18	0.1834099218915188	0.227628374546396	0.2189373705875527	0.2132653991809918	0.2086109214315735	0.1756930898059197
Ccl27	0.1230037483127017	0.2849631310951731	0.16661583832445379	0.09327802832839989	0.2027605495506579	0.2687315623702667
Il19	1e-08	1e-08	0.0029631980037377	0.0029491795045112	1e-08	1e-08
Cxcl11	0.022465114008724002	1e-08	1e-08	1e-08	1e-08	0.022652538316133203
Cxcr5	0.1904840114540834	0.0367745803759692	0.1558881990985358	0.2033009274144493	0.13606479218338	0.0853658731336919
Ccl22	1e-08	1e-08	0.01378520209991	0.027439961905584603	1e-08	1e-08
Cxcr3	0.1850973371963536	0.1696413148010952	0.0144649289502964	0.1151719067534462	0.32389259768269557	0.11485636523850609
Ppbp	0.0672676793897587	1e-08	0.0683385333362017	1e-08	0.06653081204005959	0.2034866422034471
Il2rb	0.0900655087645306	0.08048122620888769	0.0091499378107048	0.1183863373066163	0.0801710183160551	0.0544901541883707
Ltbr	59.43489167850805	59.298655127883066	54.047771831506964	68.3910162002187	65.11473130724929	63.61258081760399
Ccl5	0.2432693897109085	0.2415355321611484	1e-08	0.409954770918196	0.1203022821820256	0.3270652818521159
Ccr3	1e-08	1e-08	0.0066542728532069	0.0132455746127926	0.012956492610291	1e-08
Lta	1e-08	1e-08	1e-08	1e-08	1e-08	0.0110077392970052
Ccl25	1e-08	1e-08	1e-08	1e-08	1e-08	0.0177120017249291
Ccl24	1e-08	1e-08	1e-08	1e-08	1e-08	0.06536829157482399
Ccl19	1e-08	1e-08	1e-08	0.1339376773433434	1e-08	1e-08
Cx3cl1	2.2622502926619514	2.0508111729633924	2.2649555549672193	3.169196670754258	3.0676024515568456	2.6117217252743736
Tnf	0.070178491402475	0.0278713288978681	1e-08	0.0851500682250953	0.1388194665388322	0.056611189241741404
Cxcl12	235.16738342231912	227.3939622664108	243.16183554758885	327.63442333283683	333.27438758935574	347.7251075236648
Il10ra	0.0755614883513623	0.122764801072333	0.223314523158972	0.3889515766106377	0.3057290219856527	0.2008695140646734
Il2rg	2.0303963874843416	1.7983792381330168	1.2316954435536527	2.835743836788124	2.7738542512556386	2.4302906944285847
Il22ra1	1e-08	1e-08	1e-08	0.011303767335988	1e-08	0.0112727979344685
Ccl11	0.2178977366122248	0.3365362112933792	0.1475776800266443	0.41615858529609917	0.4070760012144344	0.5859083497596188
Il34	0.0880089064737374	0.0683856329518959	0.1749324937823911	0.2476158655927358	0.2195043497624204	0.24693746153411208
Ccl7	97.50027735141671	95.49442585061105	110.1410371748048	178.56633709606038	166.89189861148552	179.733917525015
Cxcr4	0.27726253488518837	0.7708018949295665	0.2394249067469739	1.33163292192866	1.2340139494783895	0.9505573925959623
Ccl3	1.1619285592469741	0.6235930468793576	0.7656815022337302	2.635454541992944	2.2673415076410772	1.4566116583811741
Pf4	31.857146643134623	30.95711006408917	30.160763866533145	54.37064135498273	58.99403027697197	59.324896629191244
Csf1r	2.8133675212380203	3.192360871929436	3.091473073433997	6.629735916635562	6.1897522230771305	5.268415628122226
Cxcl1	62.27904712707263	55.91370437344116	61.69774748365794	120.06603887177532	121.1605057650627	129.947624751638
Ccl2	134.9051384899577	123.15338886330427	140.0133684370735	309.67225801201914	308.1979697475727	325.9041901470409
Cxcl3	32.70067469547253	31.103421525281657	34.36119114789618	86.75848024885111	85.56710472739414	89.77657033703572
Ccl9	0.017829994657526403	0.017702914736710602	0.0181138354626077	0.5949283347300809	0.33505874798487867	0.2876598274121019
Cxcl13	2.1009955401858997	1.4184943394977116	1.8996533011060595	5.077182415494066	5.6521074727537455	4.597196967772288
Cxcl2	0.2788196251517538	0.5110751728337344	0.3922037091468971	1.3228467856295119	1.803081166737848	1.2327161297252303
Ccr5	0.08592903283336929	0.1706331692041661	0.06789763963725849	0.6468028279519022	0.566584904792766	0.5006208857865453
Cxcl6	42.01055793925988	44.28991513293109	46.829427988508044	244.71688440308	238.05415328611716	280.86442863633494
Ccl4	0.036881972033014104	0.1830954733204967	0.112407300721229	1.6408407477809916	1.3496840688313656	1.3760176101130297
Il6	2.7416885981804846	1.3048311434357924	1.5883311629087737	24.74322171395451	22.43278580944411	26.091984175764107
Ccl20	1.2172401865706168	1.409991952505798	1.8843699655911303	19.018288096189842	22.444251582916866	23.9634359623472
Ccl6	1e-08	1e-08	0.1557528459202066	4.839943613289183	5.256603465573748	4.191141464841647
Ccl12	1e-08	0.0435360423895403	1e-08	13.655441261088475	15.178879290250643	12.468454984717885
