# Supplementary material for: Peptide-based Self-adaptive Implant Coating Sequentially Regulates Bone Regeneration to Enhance Interfacial Osseointegration
Source: Research Square preprint supplement (doi:10.21203/rs.3.rs-5132912/v1), 2024-10-01
Supplement: Supplementary file 325 [file 311_African trypanosomiasis(rno05143).heatmap-data.xls]

id	S1	S2	S3	C1	C2	C3
Thop1	15.758325838541538	16.463809689787638	14.20688935677369	11.760185437501951	11.002200777945765	9.482767469544127
Myd88	18.630962439833766	20.78593369470398	19.12819969851373	14.777520355742988	14.748010533771664	12.657031976132485
Prkca	9.316841770358932	9.24258726021399	9.066203536910672	6.635572306714202	6.949536254440923	7.6485364330296575
Tlr9	0.0285537870578174	0.0070875763220837	1e-08	1e-08	0.0141205058203804	1e-08
Plcb3	15.340610270499736	16.351003722091587	14.979440459613775	14.276180021203025	14.427331737582184	13.089957608161185
Il18	0.1834099218915188	0.227628374546396	0.2189373705875527	0.2132653991809918	0.2086109214315735	0.1756930898059197
Kng2l1	1e-08	0.0780073347294957	0.0099772643402501	0.019860116211217402	0.019426673059395203	0.039611399208136805
Gnaq	25.28679433799367	24.23473328290259	24.551182549734694	24.415899031744324	23.5461186450472	26.03969686722987
Fas	16.119367698440687	14.881035381879546	16.71517988475305	16.551702687792393	15.23646577199207	17.086181902749143
Vcam1	4.1761918240943094	3.723960664045739	4.370754578063656	4.294306826066092	4.317483751839584	4.258705486548951
Plcb4	2.1921025969426524	2.128201997176332	2.457520513330578	2.4745730956295837	2.1801124201957003	2.643480676507436
F2rl1	0.08743217377212009	0.1736180243631215	0.048449476695554904	0.128587364347755	0.18081013867281728	0.09617630343486179
Il1b	0.1261396883686192	1e-08	0.018306829036790703	0.018220221596364203	0.14258048073425258	0.1635326459260579
Apoa1	1e-08	0.1851138485067069	0.1352933745351126	0.1615839787578581	0.13171453372385258	0.5371375768212479
Il12a	1e-08	1e-08	1e-08	1e-08	0.0418343121045033	1e-08
Il12b	1e-08	1e-08	1e-08	1e-08	1e-08	0.1493986167748421
Kng2	0.0431035651429522	0.1283890375565327	0.0729828989998271	0.2469679023783889	0.09947324800164249	0.11590178109322549
Prkcg	0.021279021121271703	0.1267641034101196	0.0972799209993652	0.1559872899575503	0.1631058540487824	0.10728270982118379
Icam1	21.883412058759053	23.195413799797212	19.98244748224394	28.67905455895089	30.50487911524929	28.274127251354276
Tnf	0.070178491402475	0.0278713288978681	1e-08	0.0851500682250953	0.1388194665388322	0.056611189241741404
Hba-a2	1e-08	1e-08	1e-08	1e-08	0.0427351237191624	0.1742756658044121
Kng1	0.015838283996786003	0.11007773737957349	1e-08	0.08007144156395529	0.18797733964361998	0.1756745339446482
Prkcb	0.030140949376508002	0.0374076542511166	0.0535863433511407	0.1676174525037758	0.0819796213819171	0.2051487267138603
Plcb1	0.3213051226099584	0.2701862425808913	0.1798641268062203	0.5304094929714239	0.554503199752876	0.4793666539427648
Lama4	38.88455932508241	36.72308581380185	36.41071103349492	73.09809780293972	71.95169353765088	72.55060126744081
Ido2	0.2841183513351029	0.2216447774256434	0.2577154611928757	0.5591617897516324	0.5720480117706264	0.6548313578007653
Plcb2	0.0135873586755136	0.0494652036484065	0.07361947507832599	0.4442065382420422	0.3270037378541263	0.2237782191459484
Faslg	0.0097722838857594	0.0097026338094724	0.0074458912054301	0.024702195346288303	0.019330461768964902	0.0221710669136236
Il6	2.7416885981804846	1.3048311434357924	1.5883311629087737	24.74322171395451	22.43278580944411	26.091984175764107
