# Supplementary material for: Peptide-based Self-adaptive Implant Coating Sequentially Regulates Bone Regeneration to Enhance Interfacial Osseointegration
Source: Research Square preprint supplement (doi:10.21203/rs.3.rs-5132912/v1), 2024-10-01
Supplement: Supplementary file 329 [file 312_Amoebiasis(rno05146).heatmap-data.xls]

id	S1	S2	S3	C1	C2	C3
Il1r2	1.3719801835952885	1.3775072848252994	1.2215511146346065	0.3429100860596993	0.3049328526836066	0.4974117776084263
Lama5	8.215234430238823	8.156681865014596	7.316325823843252	2.86271479436949	2.6014032072702613	2.5444677413585723
Pik3r1	16.383475819057892	15.501270229910459	16.875801974644048	7.005672301545564	7.250801604137134	8.172077605732419
Gna14	3.7551686621963865	3.911528378857408	4.09226281636588	1.7865571840179542	1.8606651575668336	1.8114188415336607
Lamc1	157.60156004804884	154.791120261757	151.54498917594887	95.03490093697488	93.00678525603595	93.90842344646815
Serpinb6a	145.3662850507547	150.18277908338646	149.8569943504548	94.8787151961342	94.22433417499893	94.95457721668983
Serpinb10	1e-08	0.0448368647177719	0.0764626934530928	1e-08	1e-08	1e-08
Cd14	23.13005080141023	26.575908477354186	26.078999226001468	17.019858716587756	17.983978300580095	17.215895948636987
Casp3	17.781763382308625	15.987098274989131	20.394406860755527	13.01954661222615	11.912954917469607	14.042574722078397
Rab7b	1.9708959010762732	1.7318451963542203	1.6185606740741245	1.3678792250265839	1.0867212312575867	1.4472258953386696
Prkca	9.316841770358932	9.24258726021399	9.066203536910672	6.635572306714202	6.949536254440923	7.6485364330296575
Prdx1	447.2552595970184	452.4212760041954	472.44969781711336	360.2002338081598	355.0956036077844	365.6222735471245
Hspb1	198.20532159168928	212.61530713341733	192.79264923349305	168.55792075577926	166.82635989400035	152.99268193382142
Lama2	1.9611471426420504	1.5971164996247664	1.5844418522641408	1.3937529388782495	1.4020793918819638	1.4467168127390977
Nfkb1	14.957286209322818	15.889074808340112	16.81443894458752	13.333081618706421	14.262562076130212	13.38024868931767
Prkaca	30.9775912380297	31.570377292190773	30.255535649519746	27.18877375598753	27.76912051527409	26.762889959795608
Plcb3	15.340610270499736	16.351003722091587	14.979440459613775	14.276180021203025	14.427331737582184	13.089957608161185
Col4a3	0.0574574708716212	0.025671584546610702	0.0233488672815753	0.0087144087033326	0.0113656214137835	0.0521431508897937
Gnas	71.21358275325896	73.79710710507179	70.49891649882187	66.21008084455806	66.06527694714363	64.3251695193796
Tgfb2	34.06262770245064	30.413957780311883	33.81103051467641	29.556495985047636	29.655117690102568	31.160400455547048
Rab5c	118.65392398448924	120.59568835732924	110.40857340549871	105.42894700917783	109.933859206575	106.82658055857375
Adcy1	0.0735576975588539	0.0146066937467236	0.0523100819168689	1e-08	0.0072752017732528	0.08900565713962519
Tlr4	2.4450720754571407	2.7372580057338647	2.4983958778171287	2.4077510727480425	2.2780975117607967	2.601250654613716
Rab5b	65.97436770839954	68.12065951576534	67.2983666379705	65.28555169460796	65.26466715295089	62.30361951447193
Rab7a	135.767334830898	128.45704480487026	127.20342456473563	127.28785716544051	126.065396874318	125.44009665805329
Rela	24.065276760249372	23.077121747566398	21.341950490318233	22.385707893155132	23.79208909982389	21.875547530616437
Gnaq	25.28679433799367	24.23473328290259	24.551182549734694	24.415899031744324	23.5461186450472	26.03969686722987
Muc2	0.0065677153256209	0.0032604576097845	0.0016680746428363	0.0016601832222190999	0.0048718307443521	0.0049668843177042
Pik3r2	19.532663833307623	20.95827346985304	18.37146464057553	19.5986826937952	21.12867162822361	18.799340405466985
Rab5a	14.833406506290165	13.10607211308515	15.253905337522419	13.985071866032158	14.733346993197157	15.195838348667285
Lamb1	89.09795448613589	84.54803186323126	84.48711854021862	91.22193627713256	88.0178510407427	88.17582432548326
Col4a5	8.953675995535795	8.098934749026652	9.352546697080545	8.754322130013641	8.716558004787174	10.46404735196128
C8g	1.5228111082155735	1.749127364263247	1.6683906932142072	1.7812612006932356	1.9491092067145843	1.505407629495868
Pik3ca	7.066312384567878	6.579668634713721	7.182432427650098	7.058149316806675	7.292771667296387	7.9213649609059456
Plcb4	2.1921025969426524	2.128201997176332	2.457520513330578	2.4745730956295837	2.1801124201957003	2.643480676507436
Ptk2	11.310792549013073	10.722656077752449	11.184150854367832	11.471178078736322	11.78406830480799	12.70583661916198
Lamc2	1.5830710451133299	1.6481319868785296	1.4979908848568912	1.6784104015582642	1.7849318313796172	1.71485914692395
Gna11	28.92466076072565	28.22967995942825	25.289960521245625	31.688464157262725	31.544678454069764	27.39740138532884
Col4a1	280.8203016478587	277.11071736245475	271.15163799988665	306.4159035643247	301.7004711322021	304.2046074555721
Rab5al1	1.3796404713448582	1.358670693952116	1.4016033763496882	1.5197261952399028	1.1981217392064931	1.9792794263480724
Prkacb	9.356520979241633	9.00196319699439	9.517743247868886	10.220883345704463	10.153143509901184	11.401895874852745
C9	1e-08	0.022454124126410402	0.0114876700832583	0.045733263175974405	0.0111837933419775	0.0114019989423134
Lamc3	0.018180461186421203	0.0108305340281104	0.0036939842343892	0.0073530069403017	0.0359626056973295	0.01466571322187
Il1b	0.1261396883686192	1e-08	0.018306829036790703	0.018220221596364203	0.14258048073425258	0.1635326459260579
Lamb2	35.42483640238172	35.23914065871266	34.2077020974775	42.892099193169834	41.92272164549258	40.35818206368368
Gnal	1e-08	0.0155178037230044	1e-08	0.0553100780737156	1e-08	0.0157595907559105
Col4a2	209.93608247436498	207.3813900577261	199.7695718632213	255.493824362498	248.55416547204678	248.50774206014202
Il1r1	17.6219508247689	16.151440409530235	18.141945900350024	21.08771595606635	19.781989990408118	22.446514796114048
Il12a	1e-08	1e-08	1e-08	1e-08	0.0418343121045033	1e-08
Il12b	1e-08	1e-08	1e-08	1e-08	1e-08	0.1493986167748421
Actn4	205.8210007809196	208.6655313666025	197.5823123553908	262.17371618613254	262.51084982120426	254.9276610431289
Arg2	0.26456112313067137	0.1805894180962776	0.11758808367346449	0.5015647733580164	0.24530911249407458	0.2334222920061889
Nos2	0.0080374233147301	0.0039900740682878	1e-08	0.0040633769446066	0.0119240641334526	0.040522353593354404
Tgfb1	46.52762031674919	47.067321560690544	39.67367879865222	59.105741163966144	61.31975529040857	52.37264547690011
Cd1d1	4.296919429722053	4.714703201525588	4.876577448548013	5.871177730397926	6.023811222067393	6.5056580059685185
Gna15	0.2333979363203065	0.31284148473607587	0.17783510276251618	0.5781796767538244	0.39243009320129807	0.2471124110592872
Pik3cb	0.9096405776733855	0.8575432789534603	1.0828089292331358	1.0776862856555016	1.3267951122284614	1.3897418519793052
Prkcg	0.021279021121271703	0.1267641034101196	0.0972799209993652	0.1559872899575503	0.1631058540487824	0.10728270982118379
Vcl	79.9700779861597	76.76107290576688	81.52967133744303	108.42527317298547	104.18658762658681	108.73146546820055
Tnf	0.070178491402475	0.0278713288978681	1e-08	0.0851500682250953	0.1388194665388322	0.056611189241741404
Col4a6	0.1507123529858827	0.2146982519210208	0.07988431125145039	0.22195531490116469	0.3661725825675124	0.2543841103294235
Arg1	5.555569339536065	5.592055432462317	6.318696355407256	8.639033735549921	8.741013431858622	8.151757910223532
Lama3	0.3250604242687036	0.329096836829592	0.282130037376091	0.5137130756651277	0.4493400285345288	0.4077798008920446
Actn1	128.74223239835587	130.41233796974998	125.54001907293615	199.71067256062952	200.86699987709468	190.85701173122848
Itgam	1.4073236132805402	2.1483382502030226	1.6978010652470932	2.8281396296002983	2.8360113754163905	2.5661421454182114
Fn1	2729.6458048797776	2637.775772801281	2495.5449579897063	4163.419081426961	4110.816065788546	4077.6511963434496
Csf2	1e-08	1e-08	1e-08	0.2171551849444231	0.0531039608346961	0.487260517044989
Pik3cd	1.9560092775532383	1.958118333142459	1.7900750831274208	3.2117950974844507	3.6613175664738877	2.87291590279214
Prkcb	0.030140949376508002	0.0374076542511166	0.0535863433511407	0.1676174525037758	0.0819796213819171	0.2051487267138603
Plcb1	0.3213051226099584	0.2701862425808913	0.1798641268062203	0.5304094929714239	0.554503199752876	0.4793666539427648
Lamb3	0.1086419256915495	0.15896277496736289	0.11037142851545939	0.2196985382370588	0.2205590175841436	0.29405072410418437
Col3a1	981.1640535291716	957.6566910066844	955.5129303693294	1845.9344289871199	1803.33433938434	1837.657893184892
Serpinb9	26.328621173488532	26.895593352871582	26.98533611876505	51.360617067665366	50.846836252922145	50.99391751889348
Col1a2	1863.5262637035455	1878.7347332412114	1837.64184058136	3599.6595895560467	3596.011754033118	3538.2760564384503
Lama4	38.88455932508241	36.72308581380185	36.41071103349492	73.09809780293972	71.95169353765088	72.55060126744081
Pik3r3	5.6630445400355	4.95810393301635	5.538457950367612	10.476848710488392	11.306549137355438	10.949904437798812
Cxcl1	62.27904712707263	55.91370437344116	61.69774748365794	120.06603887177532	121.1605057650627	129.947624751638
Serpinb6b	0.706365267305585	0.9606106396907435	0.8219897551655816	1.7833736334859032	1.7783246843088802	1.7007867301248523
Lama1	0.0214325732733335	1e-08	0.016935152462073902	0.0698279676678122	0.0518168189106126	0.045624020063249004
Tgfb3	55.64553443251943	59.20015784129221	56.74783369997554	128.95670240365047	130.1598182580928	128.60339404994602
Plcb2	0.0135873586755136	0.0494652036484065	0.07361947507832599	0.4442065382420422	0.3270037378541263	0.2237782191459484
Col1a1	2526.782231321241	2495.8319610587514	2367.8312553481283	5956.101136185713	6023.940456224581	5759.444283936097
Cxcl3	32.70067469547253	31.103421525281657	34.36119114789618	86.75848024885111	85.56710472739414	89.77657033703572
Cxcl2	0.2788196251517538	0.5110751728337344	0.3922037091468971	1.3228467856295119	1.803081166737848	1.2327161297252303
Itgb2	2.8256154879372497	3.3781705898655345	2.8112567849725583	12.564968058114014	11.481948602593457	12.037272758044807
Tlr2	1.167378749002209	1.4873467078791947	1.4807394247329988	7.307265458359606	6.560479348470582	7.7431235192170655
Il6	2.7416885981804846	1.3048311434357924	1.5883311629087737	24.74322171395451	22.43278580944411	26.091984175764107
