# Supplementary material for: Peptide-based Self-adaptive Implant Coating Sequentially Regulates Bone Regeneration to Enhance Interfacial Osseointegration
Source: Research Square preprint supplement (doi:10.21203/rs.3.rs-5132912/v1), 2024-10-01
Supplement: Supplementary file 333 [file 313_IL-17 signaling pathway(rno04657).heatmap-data.xls]

id	S1	S2	S3	C1	C2	C3
Fosb	0.7558994883736323	0.5530088112292214	0.7814053824065502	0.1407920903108584	0.170509643231763	0.1738364384445018
Fosl1	24.703374062744132	24.37180079975734	23.04261589782227	5.758594847672313	6.872155783441542	6.604240436214102
Il17re	6.909842503619668	7.9905740446420355	6.569371167162967	3.2728822885514104	2.8140618990352317	2.421855058280728
Mmp3	7.905552774472604	7.785599568493121	8.799398443385222	3.4461045760214417	3.3328763788639404	3.281625697598449
Il17rc	6.503524498117455	6.4670830675272075	5.942800973577155	3.234909475032908	3.470372301236298	3.12538996971163
Nfkbia	14.182739478986589	16.213418968863294	15.13048073230388	8.286217159675273	8.225008486983109	7.562183511418527
Ikbke	9.063258601662382	8.889869788193844	9.790630445410217	4.9433786969220845	6.197891068624789	5.961049276112088
Il17d	3.54781271874198	3.1722198534828965	3.1662007335766065	1.7044344398307514	2.5202396634380206	2.1741176697454394
Ikbkg	4.84920853755794	4.49047552344489	4.707196828921799	3.665841042859008	3.2179848177390573	3.177709719613544
Casp3	17.781763382308625	15.987098274989131	20.394406860755527	13.01954661222615	11.912954917469607	14.042574722078397
Il17rb	0.0459028590310728	1e-08	0.0466336000762708	0.0154710006543603	0.0075666795696609996	1e-08
Cxcl10	0.8352105787899504	0.2487773379402304	0.4242532765668964	0.06333693602545669	0.3097730565357274	0.2737080725993457
Hsp90b1	492.2755079151888	447.88745610785065	507.8101820303729	365.2274240873258	361.0495369113258	407.267907446233
Traf3ip2	4.834661025854855	4.694869267727602	4.670406622983177	3.46835548419368	3.5975179253046115	4.192394818534941
Il25	1e-08	1e-08	0.1578126824464865	1e-08	1e-08	1e-08
Jun	20.180822618803965	19.29234408498486	18.496194628591486	14.61707348545869	15.940556545850256	16.22842065300743
Ccl17	1e-08	0.1551779472300447	0.0396949938520512	1e-08	0.038644964320298604	1e-08
Tbk1	8.669895513617831	8.380540931126736	9.137106927197053	6.544717043649182	7.308617355602278	7.594660856955893
Fos	2.5928321149615767	1.9085714488013719	2.2102287018150295	2.0039022246027764	1.7243578144164984	1.7880528838699374
Il17ra	13.085331908134131	12.318160302172101	12.394963908039063	10.96937223118519	10.526373448563723	10.456866944083911
Mapk3	90.68227442303372	100.31036398697587	85.37399712077665	79.47662132913044	81.85347769599866	72.78668334012438
S100a8	0.09586324734896799	0.4758999591974044	0.0973893226086762	0.1938571601022076	0.0948131367939311	1e-08
Tradd	15.769757170737503	16.906203504057753	14.519349701127364	13.465026741650984	12.969000337553936	14.141555283520837
Nfkb1	14.957286209322818	15.889074808340112	16.81443894458752	13.333081618706421	14.262562076130212	13.38024868931767
Srsf1	27.031619218410636	27.23193221686229	29.812668262419617	23.68189072135157	23.208055540153353	25.397603650444353
Casp8	2.5572686051830718	2.5442238644771265	2.2692547095236533	2.163534679478793	2.2143891117115557	2.083932758225913
Hsp90ab1	543.414127652897	533.3368799450976	546.0356748326684	478.315155671828	469.59887321667696	475.58522011522535
Mapk7	9.212935695356405	9.933744013900572	9.390550201754596	8.2556407126285	8.92519441893144	8.263742603103452
Elavl1	5.423869003729809	5.067955725048152	5.415879218581036	4.840738261436274	4.940376319089586	4.821968204227568
Usp25	10.46677916597517	9.647377086733995	10.319600981564973	9.307057942627813	8.859532232464595	9.815493347406084
Fadd	5.5876172580016465	6.371722133553286	5.283142673897767	5.733619633496077	4.623579860185827	5.550557491537019
Mapk15	0.017139510271585303	1e-08	1e-08	1e-08	1e-08	0.0086412567771279
Hsp90aa1	144.92600781289968	133.3074875100486	162.07218179166335	126.84191665097744	127.41195649253723	154.6223679626419
Map3k7	11.827166636448508	11.048326984497356	11.776247199526336	10.502593159808812	10.222751614197712	11.543909947406107
Mapk1	15.253876836690662	15.382008646431204	16.54507058531675	14.759410907995575	14.620207773677492	14.694649485138859
Mapk14	25.36185508163248	25.973621599907055	25.642937088349232	25.8743005520766	25.31623295217376	24.20042114771716
Rela	24.065276760249372	23.077121747566398	21.341950490318233	22.385707893155132	23.79208909982389	21.875547530616437
Ikbkb	9.878555873670317	9.5333369327505	9.841660325915461	10.088287254353101	9.535698955555732	9.7283940354326
Tab3	1.4679505843137084	1.4574880378601713	1.6278738637641752	1.4163098072659945	1.5953080615467659	1.5586658655952121
Mapk9	10.23249110572806	10.210942603663616	10.524431321739188	10.46512770377505	10.427503613191798	10.488638212413484
Chuk	6.866797484197616	6.942124771086577	7.715915167652075	7.155946525810325	7.590585855054838	7.165024106987115
Anapc5	121.41261327833163	129.95105030942915	119.9412916963214	132.95532084224553	128.9233609922656	122.27907051783244
Il17f	0.0183552190117791	0.018224395651435403	0.0372948320377411	1e-08	0.0726165753274449	0.0185083548412437
Tab2	11.32648266815755	11.106427314948482	11.13147593889168	11.739025830575981	11.924688708500868	11.984086138156572
Mapk10	0.0228428348864892	0.029160031694207	0.0430977336475274	0.0263962151131451	0.0548677497199168	0.026323896268141602
Cebpb	42.37938331961944	39.877424761441674	45.70816407649957	47.6319337035663	46.87039252653453	42.0827028516872
Tnfaip3	0.9902791003897344	0.8210402759033462	1.0302440088321674	1.1354768930720713	0.9760655852011049	0.9607953760042038
Gsk3b	12.812115293646215	12.582416230124974	12.986687460235611	13.480973494090053	13.71994594824775	14.894510353793144
Mapk11	0.49784527692590197	0.9972658201772242	0.5590096350474403	1.368834571354301	0.5874147195650563	0.7750156154511224
Mapk4	1e-08	0.0041251999439115	1e-08	1e-08	0.0164371690230573	1e-08
Traf3	2.9326546457093006	3.2988643199290877	3.2600528655091168	3.597716971696015	3.6298535050378473	3.861351154424175
Il1b	0.1261396883686192	1e-08	0.018306829036790703	0.018220221596364203	0.14258048073425258	0.1635326459260579
Traf6	2.2052351710961866	1.9576156093759487	2.040035375346539	2.2420103514683776	2.2800820189362994	2.8506549979234634
Jund	32.37950701384034	33.940991645862255	29.456467788850066	38.78528521686933	41.81637241599569	34.72579974316814
Traf2	3.5968370605634865	3.8792601637100725	3.794189318255997	4.897492081272966	4.637169466823687	4.594390090622941
Csf3	0.2189184606767298	0.09563759594447829	0.08896140132523299	0.2479134808037848	0.1558946704015598	0.2913832348120367
Tnf	0.070178491402475	0.0278713288978681	1e-08	0.0851500682250953	0.1388194665388322	0.056611189241741404
Mapk8	2.6659496772435154	2.675410426577563	3.4489325277603538	3.830120415534581	3.97334561948756	4.666138763905404
Csf2	1e-08	1e-08	1e-08	0.2171551849444231	0.0531039608346961	0.487260517044989
Ccl11	0.2178977366122248	0.3365362112933792	0.1475776800266443	0.41615858529609917	0.4070760012144344	0.5859083497596188
Mapk13	0.2260264646183864	0.17798471121069478	0.1662799193157352	0.2679414758588446	0.3623059971463945	0.3379387487570085
Ccl7	97.50027735141671	95.49442585061105	110.1410371748048	178.56633709606038	166.89189861148552	179.733917525015
Traf5	1.151887069828991	1.187199807157536	1.0168333791345245	1.945250740198693	2.0906669988009523	2.087257041618204
Traf4	4.741924629899813	3.94110800307754	3.54765759068295	8.01432198439782	7.876682253859963	7.37172156963342
Ptgs2	7.521698256981188	7.328598579561964	8.223329540142826	13.910245916843278	14.178500391086704	16.155098769934103
Mapk6	17.2284031352227	15.971649101744152	17.378351112308536	33.076604912968754	32.52112707921475	33.69032882796401
Mapk12	0.4785895931267326	0.178191956617118	0.316035465064638	0.9073278790357244	0.6745194704000792	0.9531002741592485
Cxcl1	62.27904712707263	55.91370437344116	61.69774748365794	120.06603887177532	121.1605057650627	129.947624751638
Ccl2	134.9051384899577	123.15338886330427	140.0133684370735	309.67225801201914	308.1979697475727	325.9041901470409
Cxcl3	32.70067469547253	31.103421525281657	34.36119114789618	86.75848024885111	85.56710472739414	89.77657033703572
Lcn2	2.492444181073168	2.743666673633731	1.7339532062283873	7.231714565986702	7.47580894220844	7.102630284317117
Cxcl2	0.2788196251517538	0.5110751728337344	0.3922037091468971	1.3228467856295119	1.803081166737848	1.2327161297252303
Mmp13	1.6744013977924277	1.6895728580767801	1.6825669427480516	5.106630951921818	5.886211722543447	5.991881041482903
Il17b	0.020324662038794003	1e-08	0.0206482161925691	0.164404185365649	0.2211221263082497	0.1434595412587392
Cxcl6	42.01055793925988	44.28991513293109	46.829427988508044	244.71688440308	238.05415328611716	280.86442863633494
Il6	2.7416885981804846	1.3048311434357924	1.5883311629087737	24.74322171395451	22.43278580944411	26.091984175764107
Mmp9	0.4997413287227106	0.5434347057568754	0.4109926970792275	5.077011613958169	5.405555238533193	4.535195543410697
Ccl20	1.2172401865706168	1.409991952505798	1.8843699655911303	19.018288096189842	22.444251582916866	23.9634359623472
Ccl12	1e-08	0.0435360423895403	1e-08	13.655441261088475	15.178879290250643	12.468454984717885
