# Supplementary material for: Peptide-based Self-adaptive Implant Coating Sequentially Regulates Bone Regeneration to Enhance Interfacial Osseointegration
Source: Research Square preprint supplement (doi:10.21203/rs.3.rs-5132912/v1), 2024-10-01
Supplement: Supplementary file 337 [file 314_Relaxin signaling pathway(rno04926).heatmap-data.xls]

id	S1	S2	S3	C1	C2	C3
Vegfd	43.67780134032935	42.43345432009559	42.169968798237704	9.786070713980765	9.07996499290008	9.467696449635012
Pik3r1	16.383475819057892	15.501270229910459	16.875801974644048	7.005672301545564	7.250801604137134	8.172077605732419
Nfkbia	14.182739478986589	16.213418968863294	15.13048073230388	8.286217159675273	8.225008486983109	7.562183511418527
Gnai1	15.41943964998212	15.661614444393768	15.810166904499367	8.41995588023637	8.931969097024508	9.175444905826161
Vegfc	17.761759112015138	18.34794566242823	18.52234762930333	12.202208105495075	10.026153621356357	10.009599281225288
Gnb3	0.1065215635837825	0.1661979742634123	0.12367692626911579	0.0923188713275937	0.0301013497404897	0.0613772975198058
Adcy5	0.1704190335513618	0.2123349351174871	0.17652672904400749	0.09460317469848059	0.1321978215613942	0.1347771189201493
Adcy3	13.195185617948276	13.115854241003685	12.99370119817736	8.541565260226315	8.819322017964177	8.97645071958866
Creb3l2	26.394103564435706	26.440156547594547	27.05872736651021	18.263746527884585	18.336395112068814	17.89901639611716
Adcy2	3.8475206042031846	3.643940755667884	3.919070214049463	2.52688708183643	2.932995676043477	2.5659674585747463
Arrb1	11.487281266066464	11.457101028419038	11.035432984130582	8.542508824730097	7.842690674364045	7.682307341922464
Prkca	9.316841770358932	9.24258726021399	9.066203536910672	6.635572306714202	6.949536254440923	7.6485364330296575
Rln3	1e-08	0.0500201323198974	1e-08	1e-08	1e-08	1e-08
Gnai3	57.98810646257944	55.675052808917144	59.15421771532642	45.72963207795176	44.18980641733882	47.34698757856121
Gnao1	1.8229596047541132	1.80996679711006	1.9195918002928007	1.454094467374857	1.5883487190976475	1.374249703522095
Adcy6	20.167323951733984	19.93919027105377	19.677398899241734	15.257150761929651	16.452038292155855	15.852583692144497
Jun	20.180822618803965	19.29234408498486	18.496194628591486	14.61707348545869	15.940556545850256	16.22842065300743
Tgfbr2	92.55140065461607	92.8002461484726	90.44398764555237	74.82618447616605	75.15084337936351	73.29370242321636
Fos	2.5928321149615767	1.9085714488013719	2.2102287018150295	2.0039022246027764	1.7243578144164984	1.7880528838699374
Shc1	100.75947629607876	102.67265380377755	99.631886081142	86.71181347307665	83.94137614285097	83.58139251076193
Mapk3	90.68227442303372	100.31036398697587	85.37399712077665	79.47662132913044	81.85347769599866	72.78668334012438
Akt3	4.742749177237127	5.063635765194547	5.086933532029528	4.2546449492524365	3.984150811970837	4.430061904258992
Nfkb1	14.957286209322818	15.889074808340112	16.81443894458752	13.333081618706421	14.262562076130212	13.38024868931767
Gng11	9.915172398808817	9.036081008787457	9.179118272600112	7.688322973828902	7.208795066320605	9.309297118252212
Gnb4	6.999247667661711	7.42446303658138	7.205424777063872	6.371788054265386	5.891810142777934	6.452467371831245
Map2k7	10.043511501020252	9.63887758104423	10.44394873639393	8.539084376752077	8.736529241447121	9.059526337374805
Prkaca	30.9775912380297	31.570377292190773	30.255535649519746	27.18877375598753	27.76912051527409	26.762889959795608
Gnb1	119.8661600891432	121.04380168732978	118.1574405931722	108.86055852353468	103.89533373824844	105.19820852071987
Plcb3	15.340610270499736	16.351003722091587	14.979440459613775	14.276180021203025	14.427331737582184	13.089957608161185
Col4a3	0.0574574708716212	0.025671584546610702	0.0233488672815753	0.0087144087033326	0.0113656214137835	0.0521431508897937
Gng8	7.03765575793093	7.034168374243088	8.630112792513877	6.769578558925066	6.801161250424111	7.0421995105708
Gng10	93.58744589112992	94.51985053504899	99.11264055763327	83.9174721250967	86.29832482432553	90.78576009241772
Gnai2	311.9370971817958	339.3125126355445	309.9229587128173	293.29495448335945	297.86849731811145	282.7689604285942
Gnas	71.21358275325896	73.79710710507179	70.49891649882187	66.21008084455806	66.06527694714363	64.3251695193796
Prkcz	0.026245958226708003	0.13029443540375998	0.07554734486861839	0.0840358131987493	0.08220174730720829	0.0088216485905059
Map2k4	6.545038975778897	6.224911064085666	6.942383874657368	6.180126222730732	5.691741911158737	6.417789729504483
Adcy1	0.0735576975588539	0.0146066937467236	0.0523100819168689	1e-08	0.0072752017732528	0.08900565713962519
Gng5	83.27322179308022	80.26631718452478	79.26287537527959	70.38037414069973	75.46818605878344	80.33432149562333
Mapk1	15.253876836690662	15.382008646431204	16.54507058531675	14.759410907995575	14.620207773677492	14.694649485138859
Gnb5	10.710224890778234	11.107007717468544	10.13152172940945	9.452649278328252	10.548017153754161	10.021643519534793
Sos2	2.32139409090148	2.084908965955841	2.336769386197874	1.9452545269617783	1.8277681724661679	2.5977860350645376
Rxfp2	1e-08	1e-08	0.029470344106392602	0.007332738342304	0.0071727028998777	0.0073126485437073
Arrb2	1.6542735639817563	1.3548592794053342	1.57992682382034	1.6803657705285695	1.342097219472626	1.3990306609424379
Gng7	0.123845053302167	0.1513383000203695	0.08710378868802539	0.1107727388001048	0.07537749482993679	0.1584993541745619
Nras	21.39425343649268	21.71283539950477	22.665206884837648	21.03514939487302	20.117724060987502	23.030211207378024
Mapk14	25.36185508163248	25.973621599907055	25.642937088349232	25.8743005520766	25.31623295217376	24.20042114771716
Hras	17.833924304644963	17.42853688688946	16.0402887807215	17.4443389221126	17.043085607565825	15.983469066829116
Akt2	30.384696455702535	33.62236225131937	32.127570817132394	31.39860405985961	33.08010093665678	31.034163384849855
Rela	24.065276760249372	23.077121747566398	21.341950490318233	22.385707893155132	23.79208909982389	21.875547530616437
Gnb2	79.14130148796768	86.01316094811379	76.6794335303003	83.11716753684088	81.80125300585053	76.35330357329194
Atf2	9.935835239564874	9.037740356375293	10.1925697031345	9.313413331938529	9.556061722351165	10.24891232364405
LOC367858	0.3548184859020244	1.0333827568286496	0.4325603335346398	0.7892755497018455	0.5380952880382845	0.500890181577716
Nos3	0.0059463233162217	0.0059039420668889	1e-08	0.0060124052882025	1e-08	0.0059959328641899
Pik3r2	19.532663833307623	20.95827346985304	18.37146464057553	19.5986826937952	21.12867162822361	18.799340405466985
Mapk9	10.23249110572806	10.210942603663616	10.524431321739188	10.46512770377505	10.427503613191798	10.488638212413484
Sos1	5.278687562057684	4.667991397704318	5.2250737210120235	4.772928105850156	5.38971068769525	5.426558602650042
Grb2	42.751066826508776	43.96751310799614	43.049509901534456	45.60081989103561	43.81619123592394	44.38431606086827
Mmp2	617.7133433703117	647.1596844253282	604.0931237743388	670.6966692725189	657.9076942510458	624.0135343014572
Col4a5	8.953675995535795	8.098934749026652	9.352546697080545	8.754322130013641	8.716558004787174	10.46404735196128
Mapk10	0.0228428348864892	0.029160031694207	0.0430977336475274	0.0263962151131451	0.0548677497199168	0.026323896268141602
Pik3ca	7.066312384567878	6.579668634713721	7.182432427650098	7.058149316806675	7.292771667296387	7.9213649609059456
Atf6b	33.69352684389343	35.62280508860083	34.619498005858645	38.107788735797854	38.03466971834331	35.47641896078403
Plcb4	2.1921025969426524	2.128201997176332	2.457520513330578	2.4745730956295837	2.1801124201957003	2.643480676507436
Adcy7	4.82818988400308	4.914798892396706	4.574837438752558	5.269837541827521	5.261983932189136	4.995929832232965
Col4a1	280.8203016478587	277.11071736245475	271.15163799988665	306.4159035643247	301.7004711322021	304.2046074555721
Gng12	29.35435359207597	27.94769153124061	30.27690376576305	30.78254516912089	31.358267609307664	34.39672104633895
Map2k1	44.78033666227869	47.639303452254495	47.620307915801284	55.14271123091328	50.43724744694714	52.250342798556254
Creb1	2.797206192606541	2.358732496266318	2.718903710737916	2.7754265559016043	2.7019255106807107	3.4004677605176656
Prkacb	9.356520979241633	9.00196319699439	9.517743247868886	10.220883345704463	10.153143509901184	11.401895874852745
Mapk11	0.49784527692590197	0.9972658201772242	0.5590096350474403	1.368834571354301	0.5874147195650563	0.7750156154511224
Kras	9.370138184009244	8.016040272729656	10.299345305655606	10.757340301079381	9.822271739533619	11.706078890415776
Raf1	22.056806721073112	22.496358092562122	22.123931305127766	27.12835700717631	26.916461635349847	26.292939395318143
Adcy9	2.011629452557354	1.6883774509699851	1.7929650554279235	2.2970469354492957	2.2760950155426656	2.12307153282346
Col4a2	209.93608247436498	207.3813900577261	199.7695718632213	255.493824362498	248.55416547204678	248.50774206014202
Creb5	0.0434497508153412	0.0534561723165011	0.0422222474912674	0.052528121220250704	0.0476448543522878	0.0761952065699839
Egfr	5.413647009770682	5.205788259454916	5.866316343185813	6.585559833351068	6.8132873295101275	7.048370953032812
Akt1	61.57859818639162	63.3092303899666	59.0859707101178	80.96951892952251	76.30325699048791	72.16469118200062
Creb3l4	1e-08	1e-08	1e-08	0.0148060446553015	1e-08	1e-08
Rxfp3	1e-08	1e-08	1e-08	1e-08	1e-08	0.0834233672508891
Nos2	0.0080374233147301	0.0039900740682878	1e-08	0.0040633769446066	0.0119240641334526	0.040522353593354404
Tgfb1	46.52762031674919	47.067321560690544	39.67367879865222	59.105741163966144	61.31975529040857	52.37264547690011
Map2k2	35.87197454734145	40.366143081387946	36.841650739806425	51.92634889593364	50.49454657605205	44.29722847678789
Rxfp1	0.11239662214491339	0.1078756851930698	0.0761239347289336	0.11364569688744919	0.1408095049506072	0.1322233912629994
Gna15	0.2333979363203065	0.31284148473607587	0.17783510276251618	0.5781796767538244	0.39243009320129807	0.2471124110592872
Pik3cb	0.9096405776733855	0.8575432789534603	1.0828089292331358	1.0776862856555016	1.3267951122284614	1.3897418519793052
Nos1	0.0078081615664287	1e-08	1e-08	0.0592119424920593	1e-08	0.023619892781735603
Smad2	3.9879850702323214	4.471755155399183	4.3314604146916915	6.04250153620858	5.328182698171207	6.132831767890759
Rln1	1e-08	0.0264151307756761	1e-08	0.2690040328946365	0.0526266219507887	0.0536534141465268
Src	13.907358164387732	13.97566828767456	12.093084323871652	19.548264281188327	19.396334849918585	17.654262662612435
Mapk8	2.6659496772435154	2.675410426577563	3.4489325277603538	3.830120415534581	3.97334561948756	4.666138763905404
Tgfbr1	6.822328262036539	6.053357883995522	6.8974319168633285	9.303118244675098	8.676061370187833	10.183778539030456
Col4a6	0.1507123529858827	0.2146982519210208	0.07988431125145039	0.22195531490116469	0.3661725825675124	0.2543841103294235
Adcy4	2.9297988795834065	3.333670686157192	2.666942218269621	4.33212091415236	4.269627435090408	4.666656483987404
Shc3	0.0120316256632088	0.0119458725459104	1e-08	0.182479873091636	0.0475992830042703	0.0606599816595641
Gng3	0.6982302504654234	1.223388951388644	1.5230066844553691	2.408670896699243	2.1529898501723377	1.6773087285269395
Insl3	1e-08	0.0195749121568291	1e-08	0.0398690491967071	0.019499462388094	0.0397598182351448
Mapk13	0.2260264646183864	0.17798471121069478	0.1662799193157352	0.2679414758588446	0.3623059971463945	0.3379387487570085
Shc2	2.4078517495498084	2.6436095997193725	2.5817397973488037	4.317294082358181	4.552997274200473	4.091415655861113
Pik3cd	1.9560092775532383	1.958118333142459	1.7900750831274208	3.2117950974844507	3.6613175664738877	2.87291590279214
Creb3l1	25.020482548368438	24.737628491881825	24.474053344044442	40.91053845739372	45.362618623942936	40.66576177117263
Gng2	2.827891006687808	2.1377771030345785	2.031601623957468	4.143219483868375	3.9071851014137406	4.3359873562405005
Gng13	0.4872061751274711	1.4995744589730557	1.3363977996857235	2.4138406351924067	2.505719764200106	2.947625299531415
Ednrb	3.7807817328707976	4.020442502112778	4.528415291901727	7.151455790346796	7.473420545624426	8.112019909776885
Vegfb	6.01698636999538	6.12510555445536	4.867041659148488	9.928311070965153	10.980814071638683	10.581631639508524
Plcb1	0.3213051226099584	0.2701862425808913	0.1798641268062203	0.5304094929714239	0.554503199752876	0.4793666539427648
Col3a1	981.1640535291716	957.6566910066844	955.5129303693294	1845.9344289871199	1803.33433938434	1837.657893184892
Col1a2	1863.5262637035455	1878.7347332412114	1837.64184058136	3599.6595895560467	3596.011754033118	3538.2760564384503
Mapk12	0.4785895931267326	0.178191956617118	0.316035465064638	0.9073278790357244	0.6745194704000792	0.9531002741592485
Adcy8	0.4168519529777879	0.40366163611123457	0.2927817904832013	0.7336951813333609	0.834751181521096	0.6642247220595896
Vegfa	22.405975086960773	21.98885597181871	25.76419758105341	43.96869727695557	47.33862244979773	49.63629850662573
Atf4	126.0296806965624	119.8046358390526	126.3036749527566	247.4454294234383	254.87872357626424	248.80839490449316
Pik3r3	5.6630445400355	4.95810393301635	5.538457950367612	10.476848710488392	11.306549137355438	10.949904437798812
Plcb2	0.0135873586755136	0.0494652036484065	0.07361947507832599	0.4442065382420422	0.3270037378541263	0.2237782191459484
Col1a1	2526.782231321241	2495.8319610587514	2367.8312553481283	5956.101136185713	6023.940456224581	5759.444283936097
Edn1	2.7596198512097883	3.027476909836668	3.0977508577463317	7.44076740011006	7.598487697383847	7.557796076107888
Gng4	0.006897248457674	0.0068480896651184	0.0140140852777996	0.034869450777195804	0.0272867473353929	0.0417286989225828
Gngt2	0.0611727493896902	0.1258118327016426	0.0621465763408013	0.3490251594689406	0.3846239196348013	0.3789104688831121
Mmp13	1.6744013977924277	1.6895728580767801	1.6825669427480516	5.106630951921818	5.886211722543447	5.991881041482903
Shc4	0.4022149667056773	0.2893827954548471	0.1835819811089694	1.1905845308271232	1.4874597141039034	1.36953551195289
Acta2	477.2646447564055	513.0454583460424	470.61894808874536	2576.4505323985486	2548.322585931704	2414.875298098977
Mmp9	0.4997413287227106	0.5434347057568754	0.4109926970792275	5.077011613958169	5.405555238533193	4.535195543410697
