# Supplementary material for: Peptide-based Self-adaptive Implant Coating Sequentially Regulates Bone Regeneration to Enhance Interfacial Osseointegration
Source: Research Square preprint supplement (doi:10.21203/rs.3.rs-5132912/v1), 2024-10-01
Supplement: Supplementary file 341 [file 315_Rheumatoid arthritis(rno05323).heatmap-data.xls]

id	S1	S2	S3	C1	C2	C3
RT1-DMa	92.49304542091835	94.57802890271115	90.67115078115877	12.498797220817705	12.548883347732424	10.90648450270829
Angpt1	11.139909899285797	9.578175558137616	12.068758708123314	2.8347114466942647	2.9064754474818635	3.375304284122343
Il15	1.7959940007515023	1.9266687145275212	1.97139064657214	0.6053176936016188	0.7656552732334675	0.8326334832416552
Mmp3	7.905552774472604	7.785599568493121	8.799398443385222	3.4461045760214417	3.3328763788639404	3.281625697598449
Csf1	314.4133668817866	303.3538703396101	312.1999899285672	130.93637816846848	132.75040240215893	129.03280395954545
Atp6v1b1	0.0378397537078627	0.0657475938723381	0.11532638737599529	0.0095650751368847	0.0467815567800659	0.0190777286138269
RT1-Bb	1e-08	0.0154973451946946	1e-08	1e-08	1e-08	1e-08
Jun	20.180822618803965	19.29234408498486	18.496194628591486	14.61707348545869	15.940556545850256	16.22842065300743
Fos	2.5928321149615767	1.9085714488013719	2.2102287018150295	2.0039022246027764	1.7243578144164984	1.7880528838699374
Atp6v1c2	1.9252921397185332	1.5335356169252523	1.4450612121965771	1.2275757103514038	1.4210462671663224	1.4197967058920133
Atp6v1e1	100.16522688663893	104.59700046341213	104.51957327655145	86.8434289210836	83.76666464008295	90.23834639403151
Cd80	3.713666066717528	3.208433570233419	3.970198185194001	2.743432222821805	3.196066940342658	3.403566487933402
Tgfb2	34.06262770245064	30.413957780311883	33.81103051467641	29.556495985047636	29.655117690102568	31.160400455547048
Ctsl	907.3431676286376	911.3895803734044	922.6108790247878	848.5319481722673	829.5523642786392	852.5543503857023
Atp6v0a2	13.925218027528137	12.816903039378529	13.30913326865101	12.362790879201604	12.410399318255704	12.212058196073144
Atp6v0a1	23.468531370045383	23.591639244084078	22.143528988479364	20.78897694968352	21.770627371198984	21.383025948037925
Itgal	0.11632891392011879	0.1522497347030374	0.1181807881856959	0.1657396480451768	0.0732165782120174	0.1066358512023424
Atp6v0e1	127.01167150850158	126.92291541898898	127.85245633485549	120.50961418021315	124.38630621452444	116.97695088632507
Il18	0.1834099218915188	0.227628374546396	0.2189373705875527	0.2132653991809918	0.2086109214315735	0.1756930898059197
Tlr4	2.4450720754571407	2.7372580057338647	2.4983958778171287	2.4077510727480425	2.2780975117607967	2.601250654613716
Tcirg1	17.44846036987452	19.669097982592827	18.117439072772264	17.460665178024033	18.21371474384653	17.05041971875462
Atp6v0a4	0.029088731898274003	0.1588476957456201	0.0738794946877857	0.07352997940301789	0.028770086557863603	0.1246584873858955
Atp6v1h	17.182592705576095	18.415898628793784	21.116904771649946	19.64591215220617	16.797415545329947	18.482920893372135
Atp6v1g1	163.2121600521967	174.52598191928746	170.6706897989142	166.72012735020462	164.89132739312822	170.37603518099348
Atp6v1d	107.316078804394	105.13620330441582	112.04227271248388	108.90800506439221	104.39131525972212	108.17677938116569
Atp6v0c	223.1536200326972	240.92219134099312	221.44127535678768	230.74316112108986	237.61488016862808	215.05510561088042
Tnfsf11	0.0105189880653909	1e-08	1e-08	1e-08	1e-08	0.010606746937007699
Atp6ap1	134.01301749351387	133.40909010585165	132.0425421022251	142.2635877709095	141.82225185060582	132.6917205858544
Tnfsf13b	0.0812488028315517	0.0115242538678195	0.047166990812437304	0.011735969822364	0.0688789579944146	0.0936304603733508
Atp6v1g2	0.08332512305053989	0.0551541624700334	0.2257375838589375	0.1123348277718364	0.2335016636115641	0.14003382140882378
Atp6v0d1	107.0694760657196	115.21639242273679	103.1833018462571	122.32298337386624	127.1683084825452	113.2953404428412
Atp6v1a	28.59975074196892	26.711502313414588	28.628427855539957	29.79507386954315	30.662125788038583	33.72190670671465
Atp6v1e2	1e-08	0.0067150792631681	1e-08	0.0068384441724143	0.0066891966089977	1e-08
Atp6v1c1	22.23264919901423	20.750183739061082	22.59796168793228	24.15663765136843	24.98157624521043	25.48028856936397
RT1-Da	0.097601904580359	1e-08	0.0396622692157345	0.07894925332274569	0.15445239132300728	0.0196832456514463
Atp6v1b2	29.239745803190825	27.35645963513661	29.76770290975287	34.08645299343529	33.03838164021149	31.937711426312468
Il1b	0.1261396883686192	1e-08	0.018306829036790703	0.018220221596364203	0.14258048073425258	0.1635326459260579
Atp6v0b	32.210911392022155	36.64086618865637	30.881624609494423	41.62776668802856	40.367614095855764	35.88534627133585
Atp6v1f	125.69372661851227	127.6175379443862	120.31327017862219	149.16733980827195	149.45015106492176	143.88681338398146
Ccl5	0.2432693897109085	0.2415355321611484	1e-08	0.409954770918196	0.1203022821820256	0.3270652818521159
Acp5	2.9072697398909013	2.678014775474245	2.6840258228982177	3.2190061327055663	3.7828755665186478	3.0429896471339015
Cd86	1e-08	0.1753502523361347	1e-08	0.1913267923997548	0.0873371949902541	0.12720174066171788
Atp6v0d2	0.6708224649251291	1.2600781296972619	0.8472721155587896	1.4115502158935251	0.8786548902350296	1.4990909114600048
Tek	0.4248608435374174	0.38582261651562	0.447415462564367	0.5500749758534744	0.6251857349033526	0.4022831375887841
Ltb	0.020272458309242302	0.08051185072038279	0.020595181416389503	0.020497748045909803	0.1203022821820256	0.1635326459260579
RT1-Db1	1e-08	1e-08	1e-08	0.2635055229927021	1e-08	1e-08
Tgfb1	46.52762031674919	47.067321560690544	39.67367879865222	59.105741163966144	61.31975529040857	52.37264547690011
Atp6v0e2	5.466317533681929	6.218278789350586	7.199804343295244	7.443484875525369	7.199528100831512	9.860524702451032
Icam1	21.883412058759053	23.195413799797212	19.98244748224394	28.67905455895089	30.50487911524929	28.274127251354276
RT1-DMb	2.2341398354244397	2.0545775014228544	1.6929772563304062	2.6107745523857644	2.6986910427896733	2.7513449148224787
Flt1	0.0444715967531836	0.021117438743579003	0.0314292573811439	0.0430107789717212	0.0573710102893213	0.044842619132753704
Tnf	0.070178491402475	0.0278713288978681	1e-08	0.0851500682250953	0.1388194665388322	0.056611189241741404
RT1-Ba	1e-08	1e-08	1e-08	0.021395325493854003	1e-08	0.0853468012250383
Cxcl12	235.16738342231912	227.3939622664108	243.16183554758885	327.63442333283683	333.27438758935574	347.7251075236648
Ctsk	43.76376655790822	47.135052042526034	45.8355205313311	69.05316183058133	69.1657410835728	67.2969688115149
Cd28	0.1678922351557749	0.06452734071459769	0.12104610439971329	0.2026144307209602	0.2089055110077627	0.3222026920372972
Csf2	1e-08	1e-08	1e-08	0.2171551849444231	0.0531039608346961	0.487260517044989
Il23a	0.0307309893967489	0.1067918350697355	0.031220204956966903	0.2175074808155205	0.1519717317268072	0.139443153158235
Ccl3	1.1619285592469741	0.6235930468793576	0.7656815022337302	2.635454541992944	2.2673415076410772	1.4566116583811741
Tnfsf13	1.1447223002424456	0.8703414240591905	1.0476986256072744	1.6892421711911447	1.9277705666729474	2.09016931918384
Vegfa	22.405975086960773	21.98885597181871	25.76419758105341	43.96869727695557	47.33862244979773	49.63629850662573
Cxcl1	62.27904712707263	55.91370437344116	61.69774748365794	120.06603887177532	121.1605057650627	129.947624751638
Il11	0.1818071807967448	0.051574688223806404	0.11433897994020449	0.31513305912410067	0.4195697626826137	0.5325124983208308
Tgfb3	55.64553443251943	59.20015784129221	56.74783369997554	128.95670240365047	130.1598182580928	128.60339404994602
Tnfrsf11a	1e-08	1e-08	0.0346117513156014	0.0947320022351975	0.06739236199453519	0.0858840562057714
Ccl2	134.9051384899577	123.15338886330427	140.0133684370735	309.67225801201914	308.1979697475727	325.9041901470409
Cxcl3	32.70067469547253	31.103421525281657	34.36119114789618	86.75848024885111	85.56710472739414	89.77657033703572
Cxcl2	0.2788196251517538	0.5110751728337344	0.3922037091468971	1.3228467856295119	1.803081166737848	1.2327161297252303
Itgb2	2.8256154879372497	3.3781705898655345	2.8112567849725583	12.564968058114014	11.481948602593457	12.037272758044807
Il1a	0.0368389359046209	1e-08	0.0093563539184531	0.3538590552857489	0.5283130611279104	0.5943403250887148
Tlr2	1.167378749002209	1.4873467078791947	1.4807394247329988	7.307265458359606	6.560479348470582	7.7431235192170655
Cxcl6	42.01055793925988	44.28991513293109	46.829427988508044	244.71688440308	238.05415328611716	280.86442863633494
Il6	2.7416885981804846	1.3048311434357924	1.5883311629087737	24.74322171395451	22.43278580944411	26.091984175764107
Ccl20	1.2172401865706168	1.409991952505798	1.8843699655911303	19.018288096189842	22.444251582916866	23.9634359623472
Ccl12	1e-08	0.0435360423895403	1e-08	13.655441261088475	15.178879290250643	12.468454984717885
