# Supplementary material for: Peptide-based Self-adaptive Implant Coating Sequentially Regulates Bone Regeneration to Enhance Interfacial Osseointegration
Source: Research Square preprint supplement (doi:10.21203/rs.3.rs-5132912/v1), 2024-10-01
Supplement: Supplementary file 345 [file 316_Chemokine signaling pathway(rno04062).heatmap-data.xls]

id	S1	S2	S3	C1	C2	C3
Cxcl14	2.177811568119796	2.4960658670003117	2.063992151847951	0.4285798761055906	0.7661720117650325	0.5453106885633119
Foxo3	24.86331911163179	23.08464871736249	22.613161519396037	9.019639700927105	9.319846192809445	9.217490181130133
Pxn	20.09801761511155	19.903379675441126	18.863756325765475	8.228569750888036	8.597906292198118	7.6724889315947316
Pik3r1	16.383475819057892	15.501270229910459	16.875801974644048	7.005672301545564	7.250801604137134	8.172077605732419
Nfkbia	14.182739478986589	16.213418968863294	15.13048073230388	8.286217159675273	8.225008486983109	7.562183511418527
Ccr1	3.3935793505498646	3.801691621473868	3.642750069500296	2.149413441176506	2.0138431298367	1.7432278380706339
Gnai1	15.41943964998212	15.661614444393768	15.810166904499367	8.41995588023637	8.931969097024508	9.175444905826161
Rock2	39.721384955430025	36.09248491797861	43.57098162097881	20.9143591680392	22.252771142465054	26.56340610148804
Rasgrp2	1.3421470805424593	1.1357225940749651	1.8670832987783155	0.8096111513688818	0.882449140826994	0.6920511649334627
RSA-14-44	0.017245617884337202	1e-08	0.0175201558225368	1e-08	1e-08	1e-08
Cxcr6	0.0127302356049435	1e-08	0.0129328918356682	1e-08	1e-08	1e-08
Gnb3	0.1065215635837825	0.1661979742634123	0.12367692626911579	0.0923188713275937	0.0301013497404897	0.0613772975198058
Cxcr2	0.1436131692127071	0.1960606865685137	1e-08	1e-08	1e-08	1e-08
Grk5	4.8186597043852935	4.288531599119134	4.603676381586407	2.9157525903035886	2.7842092851979827	3.137490131348208
Adcy5	0.1704190335513618	0.2123349351174871	0.17652672904400749	0.09460317469848059	0.1321978215613942	0.1347771189201493
Adcy3	13.195185617948276	13.115854241003685	12.99370119817736	8.541565260226315	8.819322017964177	8.97645071958866
Bcar1	39.446047185436846	43.56183513609773	35.83727951300083	28.85412203968723	27.320891537379214	25.070554317684643
Adcy2	3.8475206042031846	3.643940755667884	3.919070214049463	2.52688708183643	2.932995676043477	2.5659674585747463
Arrb1	11.487281266066464	11.457101028419038	11.035432984130582	8.542508824730097	7.842690674364045	7.682307341922464
Vav2	7.002991937029107	7.013019745785142	6.812197083994428	4.983604496797065	5.011316659748437	4.826461306335268
Ikbkg	4.84920853755794	4.49047552344489	4.707196828921799	3.665841042859008	3.2179848177390573	3.177709719613544
Prkcd	21.118847153613842	20.74457908714249	22.378984886497918	16.584802076850767	16.700452485654615	15.175962029215619
Cxcl10	0.8352105787899504	0.2487773379402304	0.4242532765668964	0.06333693602545669	0.3097730565357274	0.2737080725993457
Bad	22.533919058512808	25.309810007047858	23.679577797204583	18.369874727343177	18.352014733627094	18.497060953273646
Stat2	14.664194952908163	14.593968953835645	14.083636693251588	11.600523843282152	11.087742449404292	11.143880917913405
Rac1	314.18486117310005	300.69546008230236	316.63515813440154	242.0435022918744	248.6773534130673	238.12457893963392
Grk1	0.0505809865024194	1e-08	1e-08	1e-08	1e-08	1e-08
Itk	1e-08	1e-08	0.0345206895709299	1e-08	1e-08	1e-08
Gnai3	57.98810646257944	55.675052808917144	59.15421771532642	45.72963207795176	44.18980641733882	47.34698757856121
Adcy6	20.167323951733984	19.93919027105377	19.677398899241734	15.257150761929651	16.452038292155855	15.852583692144497
Ccr7	1e-08	0.09674674864342289	0.019798495773121802	0.019704831430142	1e-08	1e-08
Ccl17	1e-08	0.1551779472300447	0.0396949938520512	1e-08	0.038644964320298604	1e-08
Was	0.9422827693880936	0.801914421268395	0.8889058735203506	0.88470056283995	0.6124313611271437	0.6651009067680607
Rock1	12.530220790167256	11.158123866874782	14.75353829723005	9.024078416803963	10.247751312433769	12.30360631111817
Shc1	100.75947629607876	102.67265380377755	99.631886081142	86.71181347307665	83.94137614285097	83.58139251076193
Mapk3	90.68227442303372	100.31036398697587	85.37399712077665	79.47662132913044	81.85347769599866	72.78668334012438
Akt3	4.742749177237127	5.063635765194547	5.086933532029528	4.2546449492524365	3.984150811970837	4.430061904258992
Cdc42	142.17207506890543	134.71662467417949	146.0907312311434	122.16326555783212	117.12324922272208	124.31531994332279
Nfkb1	14.957286209322818	15.889074808340112	16.81443894458752	13.333081618706421	14.262562076130212	13.38024868931767
Gng11	9.915172398808817	9.036081008787457	9.179118272600112	7.688322973828902	7.208795066320605	9.309297118252212
Gnb4	6.999247667661711	7.42446303658138	7.205424777063872	6.371788054265386	5.891810142777934	6.452467371831245
Jak3	3.394613831099873	3.6730266574051598	3.235114765857051	2.9647753728480772	3.191116118147805	2.797692828079884
Prkaca	30.9775912380297	31.570377292190773	30.255535649519746	27.18877375598753	27.76912051527409	26.762889959795608
Gnb1	119.8661600891432	121.04380168732978	118.1574405931722	108.86055852353468	103.89533373824844	105.19820852071987
Ccr10	1e-08	0.0134956802011204	0.0138089423848122	1e-08	1e-08	0.0137059599685444
Plcb3	15.340610270499736	16.351003722091587	14.979440459613775	14.276180021203025	14.427331737582184	13.089957608161185
Gng8	7.03765575793093	7.034168374243088	8.630112792513877	6.769578558925066	6.801161250424111	7.0421995105708
Gng10	93.58744589112992	94.51985053504899	99.11264055763327	83.9174721250967	86.29832482432553	90.78576009241772
Gnai2	311.9370971817958	339.3125126355445	309.9229587128173	293.29495448335945	297.86849731811145	282.7689604285942
Vav3	0.07507362961063749	0.10137243291337479	0.1708419848894368	0.1093074151178713	0.11880200019962449	0.0666159677164867
Crk	33.768104221913795	32.14937667463254	35.10310647426742	30.20658280741325	30.10773669821063	32.42491358462894
Prkcz	0.026245958226708003	0.13029443540375998	0.07554734486861839	0.0840358131987493	0.08220174730720829	0.0088216485905059
Lyn	4.722705017211044	4.671526585330706	4.481214654996838	4.025906465904256	4.2928727449127	4.54861194151312
Adcy1	0.0735576975588539	0.0146066937467236	0.0523100819168689	1e-08	0.0072752017732528	0.08900565713962519
Gng5	83.27322179308022	80.26631718452478	79.26287537527959	70.38037414069973	75.46818605878344	80.33432149562333
Mapk1	15.253876836690662	15.382008646431204	16.54507058531675	14.759410907995575	14.620207773677492	14.694649485138859
Gnb5	10.710224890778234	11.107007717468544	10.13152172940945	9.452649278328252	10.548017153754161	10.021643519534793
Grk4	0.3449159171394872	0.39357066480097547	0.4262410269516157	0.3877880682243477	0.24185130038151909	0.4516124769057046
Sos2	2.32139409090148	2.084908965955841	2.336769386197874	1.9452545269617783	1.8277681724661679	2.5977860350645376
Stat3	49.260296108632225	50.3441265456452	49.39976371143686	48.40036706984254	46.82186110409516	45.92858278993048
Braf	1.4083699505320502	1.5688603520889388	1.5333010917556573	1.3914598433589733	1.1997140284719428	1.6863923224865602
Arrb2	1.6542735639817563	1.3548592794053342	1.57992682382034	1.6803657705285695	1.342097219472626	1.3990306609424379
Gng7	0.123845053302167	0.1513383000203695	0.08710378868802539	0.1107727388001048	0.07537749482993679	0.1584993541745619
Nras	21.39425343649268	21.71283539950477	22.665206884837648	21.03514939487302	20.117724060987502	23.030211207378024
Hras	17.833924304644963	17.42853688688946	16.0402887807215	17.4443389221126	17.043085607565825	15.983469066829116
Rhoa	350.0674788353237	339.47191919795017	352.1714358703885	347.22497884495493	345.70671994387186	337.97185547828065
Ccl27	0.1230037483127017	0.2849631310951731	0.16661583832445379	0.09327802832839989	0.2027605495506579	0.2687315623702667
Akt2	30.384696455702535	33.62236225131937	32.127570817132394	31.39860405985961	33.08010093665678	31.034163384849855
Rela	24.065276760249372	23.077121747566398	21.341950490318233	22.385707893155132	23.79208909982389	21.875547530616437
Gnb2	79.14130148796768	86.01316094811379	76.6794335303003	83.11716753684088	81.80125300585053	76.35330357329194
Gnaq	25.28679433799367	24.23473328290259	24.551182549734694	24.415899031744324	23.5461186450472	26.03969686722987
Cxcl11	0.022465114008724002	1e-08	1e-08	1e-08	1e-08	0.022652538316133203
LOC367858	0.3548184859020244	1.0333827568286496	0.4325603335346398	0.7892755497018455	0.5380952880382845	0.500890181577716
Ikbkb	9.878555873670317	9.5333369327505	9.841660325915461	10.088287254353101	9.535698955555732	9.7283940354326
Gsk3a	29.18503004735248	29.082774683174716	26.522356143762824	27.30154864939425	28.918003682149	29.127788701045663
Pik3r2	19.532663833307623	20.95827346985304	18.37146464057553	19.5986826937952	21.12867162822361	18.799340405466985
Chuk	6.866797484197616	6.942124771086577	7.715915167652075	7.155946525810325	7.590585855054838	7.165024106987115
Rap1a	19.5819067816852	20.93425015197452	22.450834664372692	21.396258143057263	20.31399985423797	22.872094869795706
Sos1	5.278687562057684	4.667991397704318	5.2250737210120235	4.772928105850156	5.38971068769525	5.426558602650042
Grb2	42.751066826508776	43.96751310799614	43.049509901534456	45.60081989103561	43.81619123592394	44.38431606086827
Stat5b	2.996170057514959	2.813816789779069	2.9540111242594	3.2642225222112744	2.934189592267906	2.872523936123432
Rap1b	90.63536032758968	90.88113880116856	99.1033841357576	97.07541583290833	95.49919318901671	98.29217190042884
Cxcr5	0.1904840114540834	0.0367745803759692	0.1558881990985358	0.2033009274144493	0.13606479218338	0.0853658731336919
Plcg1	23.28142951676821	24.12788633145028	23.22082302283229	25.298905824112946	25.29892086182227	24.33169333432177
Crkl	15.267456443411044	14.404099640763677	15.527853159539854	15.94651580354094	16.747048086737927	15.549812960032188
Pik3ca	7.066312384567878	6.579668634713721	7.182432427650098	7.058149316806675	7.292771667296387	7.9213649609059456
Stat1	34.662684498659665	35.437089021820135	36.88022414491152	38.228156224859795	38.06688038359571	38.609688985748164
Plcb4	2.1921025969426524	2.128201997176332	2.457520513330578	2.4745730956295837	2.1801124201957003	2.643480676507436
Ccl22	1e-08	1e-08	0.01378520209991	0.027439961905584603	1e-08	1e-08
Pik3cg	0.6500034919991295	0.4324649136006412	0.39484910931566297	0.5352673893610271	0.5368406008493507	0.5506933267918959
Ptk2	11.310792549013073	10.722656077752449	11.184150854367832	11.471178078736322	11.78406830480799	12.70583661916198
Adcy7	4.82818988400308	4.914798892396706	4.574837438752558	5.269837541827521	5.261983932189136	4.995929832232965
Gsk3b	12.812115293646215	12.582416230124974	12.986687460235611	13.480973494090053	13.71994594824775	14.894510353793144
Gng12	29.35435359207597	27.94769153124061	30.27690376576305	30.78254516912089	31.358267609307664	34.39672104633895
Nfkbib	5.652984538102331	7.141900963109009	4.93483273445779	6.639919179833872	7.331989241828617	5.751345794727594
Cxcr3	0.1850973371963536	0.1696413148010952	0.0144649289502964	0.1151719067534462	0.32389259768269557	0.11485636523850609
Map2k1	44.78033666227869	47.639303452254495	47.620307915801284	55.14271123091328	50.43724744694714	52.250342798556254
Ppbp	0.0672676793897587	1e-08	0.0683385333362017	1e-08	0.06653081204005959	0.2034866422034471
Prkacb	9.356520979241633	9.00196319699439	9.517743247868886	10.220883345704463	10.153143509901184	11.401895874852745
Pard3	5.3063655540386305	5.354823759430191	4.926651740888295	5.688446272757032	6.2490908807232906	5.941382477695013
Kras	9.370138184009244	8.016040272729656	10.299345305655606	10.757340301079381	9.822271739533619	11.706078890415776
Grk6	9.35903555963267	9.981941516273807	10.213642850638088	12.080631932391517	11.990447276867707	11.035909094005621
Ccl5	0.2432693897109085	0.2415355321611484	1e-08	0.409954770918196	0.1203022821820256	0.3270652818521159
Raf1	22.056806721073112	22.496358092562122	22.123931305127766	27.12835700717631	26.916461635349847	26.292939395318143
Jak2	14.316782306957117	13.41171702845712	16.255475342200707	17.740894176548316	16.870162740296564	18.40436220523281
Grk2	12.661121955663384	12.761671253635502	11.43831184020459	15.51474841069565	15.197258971460789	13.728385386878912
Dock2	0.0698685864276208	0.1387412121205131	0.07832368998158079	0.1412900757490958	0.0929319239607182	0.1579085076534686
Adcy9	2.011629452557354	1.6883774509699851	1.7929650554279235	2.2970469354492957	2.2760950155426656	2.12307153282346
Pak1	25.93421694709589	26.349699481613392	25.693183215325195	34.16343705599805	31.906725870081583	31.054227926456214
Akt1	61.57859818639162	63.3092303899666	59.0859707101178	80.96951892952251	76.30325699048791	72.16469118200062
Pik3r6	0.0039150595412028	0.0038871557490661	0.0039773843740646	0.0395855887659104	0.0038721730816965	0.0039477224413367
Ccr3	1e-08	1e-08	0.0066542728532069	0.0132455746127926	0.012956492610291	1e-08
Ccl25	1e-08	1e-08	1e-08	1e-08	1e-08	0.0177120017249291
Ccl24	1e-08	1e-08	1e-08	1e-08	1e-08	0.06536829157482399
Ccl19	1e-08	1e-08	1e-08	0.1339376773433434	1e-08	1e-08
Pik3cb	0.9096405776733855	0.8575432789534603	1.0828089292331358	1.0776862856555016	1.3267951122284614	1.3897418519793052
Cx3cl1	2.2622502926619514	2.0508111729633924	2.2649555549672193	3.169196670754258	3.0676024515568456	2.6117217252743736
Rac2	1.2130558391018111	1.7675107860543917	1.5684668769365377	2.405286146846986	2.02558184722763	1.7632800484681939
Src	13.907358164387732	13.97566828767456	12.093084323871652	19.548264281188327	19.396334849918585	17.654262662612435
Cxcl12	235.16738342231912	227.3939622664108	243.16183554758885	327.63442333283683	333.27438758935574	347.7251075236648
Cxcl16	5.659469024106383	5.784400798487258	5.495906561607369	7.798122487397887	8.86266675721338	7.692835783205889
Tiam1	0.27604347375385657	0.2584145384063715	0.2852453979257249	0.3572622976841964	0.36506623493075957	0.4644409756118648
Adcy4	2.9297988795834065	3.333670686157192	2.666942218269621	4.33212091415236	4.269627435090408	4.666656483987404
Ptk2b	5.0047402018208365	6.17640289322366	5.381813077450496	8.435828020403415	7.9788875615546155	8.30486067774468
Shc3	0.0120316256632088	0.0119458725459104	1e-08	0.182479873091636	0.0475992830042703	0.0606599816595641
Gng3	0.6982302504654234	1.223388951388644	1.5230066844553691	2.408670896699243	2.1529898501723377	1.6773087285269395
Ccl11	0.2178977366122248	0.3365362112933792	0.1475776800266443	0.41615858529609917	0.4070760012144344	0.5859083497596188
Shc2	2.4078517495498084	2.6436095997193725	2.5817397973488037	4.317294082358181	4.552997274200473	4.091415655861113
Pik3cd	1.9560092775532383	1.958118333142459	1.7900750831274208	3.2117950974844507	3.6613175664738877	2.87291590279214
Ccl7	97.50027735141671	95.49442585061105	110.1410371748048	178.56633709606038	166.89189861148552	179.733917525015
Prex1	0.4034853668418895	0.3204876816173516	0.4660013199818918	0.7558168736092529	0.7687261345224182	0.5781575443681799
Gng2	2.827891006687808	2.1377771030345785	2.031601623957468	4.143219483868375	3.9071851014137406	4.3359873562405005
Plcg2	0.5901699546190872	0.45160254315328857	0.40862076614140397	0.8931924435356917	0.8476736166878912	0.8300988353849464
Cxcr4	0.27726253488518837	0.7708018949295665	0.2394249067469739	1.33163292192866	1.2340139494783895	0.9505573925959623
Gng13	0.4872061751274711	1.4995744589730557	1.3363977996857235	2.4138406351924067	2.505719764200106	2.947625299531415
Ccl3	1.1619285592469741	0.6235930468793576	0.7656815022337302	2.635454541992944	2.2673415076410772	1.4566116583811741
Vav1	0.3844434282688503	0.3238695350823369	0.4615750399431134	0.8363278922490569	0.6394813131510972	0.6695786551053651
Prkcb	0.030140949376508002	0.0374076542511166	0.0535863433511407	0.1676174525037758	0.0819796213819171	0.2051487267138603
Pf4	31.857146643134623	30.95711006408917	30.160763866533145	54.37064135498273	58.99403027697197	59.324896629191244
Plcb1	0.3213051226099584	0.2701862425808913	0.1798641268062203	0.5304094929714239	0.554503199752876	0.4793666539427648
Elmo1	0.0696323068050464	0.0643125732344461	0.07732134292806189	0.129350802297373	0.1153164268310266	0.1730837929019062
Adcy8	0.4168519529777879	0.40366163611123457	0.2927817904832013	0.7336951813333609	0.834751181521096	0.6642247220595896
Pik3r3	5.6630445400355	4.95810393301635	5.538457950367612	10.476848710488392	11.306549137355438	10.949904437798812
Cxcl1	62.27904712707263	55.91370437344116	61.69774748365794	120.06603887177532	121.1605057650627	129.947624751638
Ccl2	134.9051384899577	123.15338886330427	140.0133684370735	309.67225801201914	308.1979697475727	325.9041901470409
Plcb2	0.0135873586755136	0.0494652036484065	0.07361947507832599	0.4442065382420422	0.3270037378541263	0.2237782191459484
Grk3	0.0210629184879422	0.0104564032499711	0.0392300711353259	0.0780889465200442	0.1249930898297458	0.1274318164384522
Gng4	0.006897248457674	0.0068480896651184	0.0140140852777996	0.034869450777195804	0.0272867473353929	0.0417286989225828
Hck	0.5295080813461227	0.6400241322458433	0.7250461613316809	1.3850372518459382	1.7191274723399366	1.8571329099672886
Cxcl3	32.70067469547253	31.103421525281657	34.36119114789618	86.75848024885111	85.56710472739414	89.77657033703572
Ccl9	0.017829994657526403	0.017702914736710602	0.0181138354626077	0.5949283347300809	0.33505874798487867	0.2876598274121019
Cxcl13	2.1009955401858997	1.4184943394977116	1.8996533011060595	5.077182415494066	5.6521074727537455	4.597196967772288
Cxcl2	0.2788196251517538	0.5110751728337344	0.3922037091468971	1.3228467856295119	1.803081166737848	1.2327161297252303
Gngt2	0.0611727493896902	0.1258118327016426	0.0621465763408013	0.3490251594689406	0.3846239196348013	0.3789104688831121
Ncf1	1.7582836455342892	1.4547931715316693	1.0972827779102723	5.130291018061996	4.943793809118208	4.6856610740341145
Ccr5	0.08592903283336929	0.1706331692041661	0.06789763963725849	0.6468028279519022	0.566584904792766	0.5006208857865453
Shc4	0.4022149667056773	0.2893827954548471	0.1835819811089694	1.1905845308271232	1.4874597141039034	1.36953551195289
Cxcl6	42.01055793925988	44.28991513293109	46.829427988508044	244.71688440308	238.05415328611716	280.86442863633494
Ccl4	0.036881972033014104	0.1830954733204967	0.112407300721229	1.6408407477809916	1.3496840688313656	1.3760176101130297
Pik3r5	0.17120536662389088	0.14422981055430528	0.1159538935923634	1.043893579125089	0.9903235348451996	0.889325168563707
Fgr	0.13185410521650248	0.0723474026285737	0.0951772265573361	0.8104416434541079	0.8545269351475892	0.9061874506371564
Ccl20	1.2172401865706168	1.409991952505798	1.8843699655911303	19.018288096189842	22.444251582916866	23.9634359623472
Ccl6	1e-08	1e-08	0.1557528459202066	4.839943613289183	5.256603465573748	4.191141464841647
Ccl12	1e-08	0.0435360423895403	1e-08	13.655441261088475	15.178879290250643	12.468454984717885
