# Supplementary material for: Peptide-based Self-adaptive Implant Coating Sequentially Regulates Bone Regeneration to Enhance Interfacial Osseointegration
Source: Research Square preprint supplement (doi:10.21203/rs.3.rs-5132912/v1), 2024-10-01
Supplement: Supplementary file 349 [file 3_Drug metabolism - other enzymes(rno00983).heatmap-data.xls]

id	S1	S2	S3	C1	C2	C3
Gstm3	0.0081228983791406	0.0080650039932596	0.0082522090443715	1e-08	1e-08	1e-08
Gsta1	306.03792153875213	305.6026456078112	307.3784159785956	25.678036869004604	24.28845391676968	26.45302789980771
Ugt1a6	11.95986777662241	13.255842625938866	13.661682188035696	1.7875432661750081	1.681646786003988	1.7729046211086135
Gsta5	2.0317116515686466	1.2452043262262593	2.064055070764603	1e-08	0.0248081056759544	1e-08
Dpys	0.3462034870188029	0.3020710189588841	0.3090827065954576	0.0636456228603171	0.031128289554409803	0.0528927101444494
Gstp1	500.321704418056	516.810635737434	494.17870100634735	106.72428525443492	104.0905111195828	101.34004741539319
Xdh	75.05995622186845	75.15189912082451	71.81610808801123	18.149829531854888	17.12363447640194	16.673242460234448
Gsta2	0.5231234668357057	0.6287413149745243	0.8671046223774811	0.1113551636633611	0.1633872819867511	0.1110500790474626
Ugt1a7c	3.660502160538111	3.4786520679804966	3.2831468767102447	1.099779707841323	1.034401172460291	1.2022249182832636
Rrm2	19.7137636759507	18.402453444244202	20.762550454704872	6.568695249164418	6.089042115928487	6.806015469998706
LOC100359539	4.682393189080845	5.241542490400262	4.738278951018323	1.921621225117444	1.7434733427163203	1.5553038075937768
Gstm1	45.53356173657048	47.60950914159571	41.930834386865364	17.383676510575278	16.833479050644716	16.562118897759337
Upp1	21.278579236449122	21.99569064067068	18.532978988127663	9.021575575128805	8.39197038154795	7.526346934888082
Gstt2	8.915766994142976	10.588618807247506	9.458328754669271	3.640612021513944	4.239471827179759	4.166588951125471
Uck2	28.725702481934327	29.73432670730868	30.043977054451368	14.103481440507787	13.165862914955724	13.658807148061403
Tk1	10.36839313609594	9.635646693596081	10.144523247792195	4.612791978984153	5.395610406652208	4.9282769896353065
Rrm1	33.350823467473404	35.34616874424859	33.33049765670844	18.24822873678312	16.986632896991885	17.12774895242499
Mgst2	75.23429643871205	72.3663347352602	79.29501471889036	40.535484855496456	38.940315416410634	40.39656830118608
Gstt3	2.7164583350990688	2.5384444997557747	2.2874538954129866	1.3806672833352938	1.5660452938484712	1.3329414829531325
Gstm2	190.81332753780092	209.34083083854833	197.98897462861916	134.8681416964187	122.22953430163864	122.6735895171186
Dut	9.59376140986353	9.453853858807788	9.697693909798534	5.402588410984826	6.210981010186013	6.755921299870227
Nme3	8.071443429406127	9.019351625795338	9.198451211459473	5.872408585265932	5.803159678762133	5.886352097622735
Gstm5	57.71216179150389	55.46675787139734	56.18557516785085	40.29845609223954	41.1352242235911	36.660305605650834
Nme1	136.81534465030637	143.70009688883675	143.6607677776486	103.26943990362604	92.62676440248899	100.99092175822305
Nme7	2.9935660283838406	2.944190034775696	3.0986030296018616	2.1824206183026265	2.2106046520562197	2.1113515101978386
Nat1	5.94566764578024	5.552284507212363	5.958692563943132	4.232591641354393	4.362722925723599	4.601776200049588
Tymp	4.392504355096574	3.951103063561302	4.067024749358901	2.9153683319245287	3.7080488439965342	3.075576561680145
Itpa	43.156755036326864	43.02786688634485	47.84620128092722	36.09402374070644	32.31958476319005	37.58819736765297
Ugt1a3	0.0424531155583955	1e-08	1e-08	1e-08	1e-08	1e-08
Gsta3	1e-08	0.0320292436380814	1e-08	1e-08	1e-08	1e-08
Ces2	1e-08	1e-08	0.024533574726509903	1e-08	1e-08	1e-08
Ugt1a1	1e-08	0.0208140493894216	1e-08	1e-08	1e-08	1e-08
Gsta4	15.901209083811368	14.156232477308597	14.978628608764915	13.38656579447718	10.072620361871397	12.276297476840226
Hprt1	48.07051853626996	47.905152250449504	54.65583010633114	38.59497883418675	40.33690936256189	41.43484345623558
Gmps	6.495387105627447	5.81638005706174	6.510389242243291	5.121049248700305	4.685287205288039	5.4889485428307285
Nat2	0.8755713129800793	0.8380599471394355	0.7295260180965961	0.5445560387887035	0.5202110590985456	0.8701728708121872
Umps	34.89963676191799	34.94293900031789	33.408284630665214	27.52512654890653	30.89541683214069	27.642500427056603
Nat3	0.11420364163277369	1e-08	0.0515651980264587	0.0128303197736455	0.050201172525404	1e-08
Gsta6	0.4437573084919873	0.523725548151401	0.5699065638758779	0.465620481028729	0.4223341536432639	0.43057426993826997
Gstm6	0.2286746508052204	0.2889661248945785	0.4646299702419197	0.27325519392370007	0.3289740899733238	0.1257722567701727
Gstm7	7.089756423830128	6.436418892801024	5.610881052551473	6.019994090593286	5.578682051036465	4.956837872817468
Tpmt	5.401053756622969	5.512710388668253	5.113916369436064	4.336094508602277	4.7222300759674445	4.825257230084661
Cmpk1	50.20090070887142	48.22746394177683	54.30634655450168	42.83015675912363	42.9218717261299	46.56290937261736
Nme2	751.8552252906267	726.1572733407747	746.4024636911072	635.3528576296372	660.8016674190831	641.5707417216685
Mgst1	51.87658773490025	57.53424392368	55.479048761836644	49.45046317094978	46.5257799760386	48.6260027746506
Gsto1	37.64005338831383	38.39298650302365	42.06318219626341	36.79711499758453	36.0373128192774	35.43851973402807
Impdh1	31.245302576180173	35.696280550489114	31.21937523191555	29.61687878272299	32.38757376350276	28.290900664914066
Tk2	5.956231216833463	6.2730729297716845	5.633736417076618	5.8048645982216	5.562095975678674	5.157796380938428
Ugt1a2	0.1270177281503536	0.5359778070531698	0.4516391378508749	0.5137171247992344	0.10468862116719259	0.2561548407040264
Gusb	23.34418590408593	23.20623193014168	20.710125853545623	23.140417815005694	20.69089173159508	19.01592557796615
Gstm4	8.724759852552545	10.708853470305307	10.236238399082136	10.129926645841307	8.572564630310662	9.270908699893225
Gstt1	2.353354628552995	2.6142899875421732	2.1066637354923627	2.5550451447686897	2.2035652138620483	2.129854389266712
Rrm2b	4.01153935934498	3.839159123103318	4.055783393743462	3.685163173793088	3.681126906484376	4.434418312544602
Impdh2	99.99087271773728	106.7775918516536	94.91709307922054	102.359336916104	99.06562796120707	97.98400478814075
Uck1	8.256140738081477	11.310809873438776	9.79379777962647	9.797006842777815	10.47971992989517	9.918385509585715
Mpo	0.0651395412935215	0.0485064559910972	1e-08	0.0329317266954919	0.2093844323764188	0.016420756110869603
Gsto2	0.409320566576471	0.2477124366352509	0.4079159635853361	0.4927016489039893	0.3007358843516426	0.4795593302362438
Ces2g	0.10502437124078469	0.037918489823148	0.14549493065126828	0.1158452908272063	0.10387390737867369	0.2310557988245593
Ces2c	1.089373414226321	1.2432288566605911	1.3484119522106612	1.0888190429114477	1.9071928799035176	1.616127931832983
Ugt1a9	1e-08	1e-08	0.0107967605450372	1e-08	0.1366449606890991	1e-08
Uckl1	6.190559889307532	6.182017776097044	6.266355593645543	7.319189300351533	7.9214699427969295	7.91342036732089
Cda	0.12195597478903969	0.1304011212777039	0.17155028094222438	0.3035354526322998	0.454644730121612	0.0472974839405793
Nme6	5.073904215398948	6.165410394591732	4.803506976680594	6.465914224540423	6.752147977627659	6.80919884750096
Dpyd	0.0063091545843845	0.006264187322236	0.016023964312778402	0.028706674313696202	0.021840124072303003	0.0063617912004275
LOC679149	1e-08	1e-08	1e-08	1e-08	1e-08	0.07162730453561339
Upb1	1e-08	1e-08	1e-08	0.09184665208806639	1e-08	1e-08
Nme4	7.567266075783999	8.024992372113207	9.368561834600948	10.092118862056285	11.347274122894294	10.283261844818878
Ugt1a8	1e-08	0.0105518311357054	1e-08	0.0214913547375427	1e-08	0.053581169886006405
Mgst3	6.742804274128404	6.1965325140794745	5.989894209068197	7.895891601215947	8.747170253317192	8.348611823422488
