# Supplementary material for: Peptide-based Self-adaptive Implant Coating Sequentially Regulates Bone Regeneration to Enhance Interfacial Osseointegration
Source: Research Square preprint supplement (doi:10.21203/rs.3.rs-5132912/v1), 2024-10-01
Supplement: Supplementary file 353 [file 4_Glutathione metabolism(rno00480).heatmap-data.xls]

id	S1	S2	S3	C1	C2	C3
Gstm3	0.0081228983791406	0.0080650039932596	0.0082522090443715	1e-08	1e-08	1e-08
Gsta1	306.03792153875213	305.6026456078112	307.3784159785956	25.678036869004604	24.28845391676968	26.45302789980771
Gsta5	2.0317116515686466	1.2452043262262593	2.064055070764603	1e-08	0.0248081056759544	1e-08
Gstp1	500.321704418056	516.810635737434	494.17870100634735	106.72428525443492	104.0905111195828	101.34004741539319
Gsta2	0.5231234668357057	0.6287413149745243	0.8671046223774811	0.1113551636633611	0.1633872819867511	0.1110500790474626
Nat8f3	0.1684283653659402	0.0975496261425385	0.1283322221689906	1e-08	0.0069409828269416	0.021229202215653
Gclc	34.49534351105496	35.310309060110754	38.15925079844774	12.333020209873998	10.77739325168213	11.710366736207344
Rrm2	19.7137636759507	18.402453444244202	20.762550454704872	6.568695249164418	6.089042115928487	6.806015469998706
LOC100359539	4.682393189080845	5.241542490400262	4.738278951018323	1.921621225117444	1.7434733427163203	1.5553038075937768
Gstm1	45.53356173657048	47.60950914159571	41.930834386865364	17.383676510575278	16.833479050644716	16.562118897759337
Gstt2	8.915766994142976	10.588618807247506	9.458328754669271	3.640612021513944	4.239471827179759	4.166588951125471
Pgd	328.90946038589766	334.59699558292243	331.7802795408571	139.81883270004	140.82077771888913	141.6210410560225
Oplah	9.7162259166727	9.77976768457762	9.303424472120485	4.30620949644359	4.601287668911414	4.3737418478522745
Rrm1	33.350823467473404	35.34616874424859	33.33049765670844	18.24822873678312	16.986632896991885	17.12774895242499
Mgst2	75.23429643871205	72.3663347352602	79.29501471889036	40.535484855496456	38.940315416410634	40.39656830118608
Gsr	31.639221044314738	32.404927902106515	31.349725024476232	17.13424760016886	18.089473346522333	16.880811046501314
Gstt3	2.7164583350990688	2.5384444997557747	2.2874538954129866	1.3806672833352938	1.5660452938484712	1.3329414829531325
Gss	34.939512042608754	37.94958637422828	36.38249310677115	22.300517309841652	21.59494495130185	23.317919882185667
Gstm2	190.81332753780092	209.34083083854833	197.98897462861916	134.8681416964187	122.22953430163864	122.6735895171186
Gstk1	15.442317156866364	17.245510632799856	15.366339812473305	10.889714702697928	11.513611450671727	9.475777362165873
Prdx6	342.2000642428137	344.81453130832546	324.40744103146716	224.36632498407567	228.27899569018072	223.64004969323528
Gpx3	480.7820620330932	521.9704307845308	477.1120587436126	335.53312908646967	342.96932226730803	316.388431135584
G6pd	176.03552063079954	185.07424321680028	165.43586536021175	128.1649342683324	122.96607704568807	112.71279863880531
Gstm5	57.71216179150389	55.46675787139734	56.18557516785085	40.29845609223954	41.1352242235911	36.660305605650834
Ggct	5.392986493548833	5.078778216615584	5.478839042201295	3.721090848692082	3.5940940900995657	3.874268792310793
Ggt7	4.986469350669059	5.935150077339047	4.898005990846248	3.910497754806744	3.854861780724521	3.6347501291557696
Gpx7	82.92397696710817	88.09566005442251	81.28563045439576	64.41220331393471	66.06536858506692	62.17014256706336
Gsta3	1e-08	0.0320292436380814	1e-08	1e-08	1e-08	1e-08
Gpx5	1e-08	1e-08	0.0146588523000262	1e-08	1e-08	1e-08
Gsta4	15.901209083811368	14.156232477308597	14.978628608764915	13.38656579447718	10.072620361871397	12.276297476840226
Ggt1	0.4875061673784635	0.6514069521994721	0.6850420942260473	0.5159576971683157	0.5497592485623093	0.39969051250775217
Gpx8	233.5047025850172	235.9136426415244	246.2596062720879	198.85755109273953	191.47439534716656	210.67777059795762
Ggt5	10.996731958587185	11.303296778954488	9.445893526736663	9.265783114766133	9.084475014610181	8.472733470995452
Lancl1	9.291688866654471	8.800455211241921	8.688029971478183	7.277909399703722	7.2203111904088155	8.327664109083893
Gsta6	0.4437573084919873	0.523725548151401	0.5699065638758779	0.465620481028729	0.4223341536432639	0.43057426993826997
Gstm6	0.2286746508052204	0.2889661248945785	0.4646299702419197	0.27325519392370007	0.3289740899733238	0.1257722567701727
Gstm7	7.089756423830128	6.436418892801024	5.610881052551473	6.019994090593286	5.578682051036465	4.956837872817468
Mgst1	51.87658773490025	57.53424392368	55.479048761836644	49.45046317094978	46.5257799760386	48.6260027746506
Anpep	156.2009287669674	160.13258347116914	148.4484565309293	140.54139286301736	138.95219192113598	131.0303903672468
Nat8f4	0.0072721904745685	0.0505424554645154	0.0073879584687784996	0.0220590008209053	0.0143850482789318	1e-08
Sms	4.566954620593667	4.064623850642922	4.4376302030311345	3.5984838853333776	3.5674228479151817	4.646543298727888
Gsto1	37.64005338831383	38.39298650302365	42.06318219626341	36.79711499758453	36.0373128192774	35.43851973402807
Hpgds	0.0152861427470594	0.0455315609819595	0.0155294872203634	0.027048025859160503	0.0151186945178185	0.0192670894425471
Ldc1	1e-08	0.06312959509761479	1e-08	1e-08	0.0251545130269613	0.0128226549222365
Gclm	8.179169961176264	6.856925111352601	6.935257894377122	5.824443296034541	6.106526098322033	8.552273304686812
Gstm4	8.724759852552545	10.708853470305307	10.236238399082136	10.129926645841307	8.572564630310662	9.270908699893225
Gpx1	226.0359273551316	234.0095230293477	218.2146676686832	215.551149902574	222.8650269053347	203.70487721677742
Lap3	51.09168652636747	49.71707403509235	52.509983943824224	50.159717672728384	47.40521946232423	51.49610553118403
Gstt1	2.353354628552995	2.6142899875421732	2.1066637354923627	2.5550451447686897	2.2035652138620483	2.129854389266712
Rrm2b	4.01153935934498	3.839159123103318	4.055783393743462	3.685163173793088	3.681126906484376	4.434418312544602
Txndc12	57.17899740161123	58.418418416657104	60.48484997202597	57.12381719592107	56.18270345582882	61.41122208780956
Gpx2	0.3751005189139817	0.09310677233802679	0.5001568065358452	0.3792690482197647	0.3941785440670464	0.1891149790709264
Idh1	48.83632798696488	43.54216423508815	47.61270048706892	48.38851942406831	46.703685988572	50.6939655087968
Nat8f1	0.0108516230271288	0.0754199011239516	0.1212680037478337	0.0768054665826574	0.085861943338592	0.08753718633438849
Idh2	51.406661038384094	57.36757570415984	52.4695988746585	59.49542025301562	60.28390990061404	57.27613206389659
Gpx4	192.22729921086082	218.71419042199312	189.44756327563223	223.44568076604168	229.1803622570777	215.3213148716599
Gsto2	0.409320566576471	0.2477124366352509	0.4079159635853361	0.4927016489039893	0.3007358843516426	0.4795593302362438
Srm	44.79267224760805	46.928004482233526	44.761574237153376	54.34484598093772	59.497986873852874	50.11510116226985
Nat8f5	1e-08	1e-08	1e-08	0.020101905917399302	1e-08	1e-08
Mgst3	6.742804274128404	6.1965325140794745	5.989894209068197	7.895891601215947	8.747170253317192	8.348611823422488
Chac2	2.937656555427792	2.3193186861782022	2.8405944149822107	4.312307399437263	3.115511170405065	3.854383572454532
Odc1	45.35835605857956	47.9644846531704	47.13331669181013	66.72615088141832	67.7631959604042	67.22119914042581
Chac1	4.421745293736241	4.270360357195831	3.832880859959054	26.93212042835817	26.28462800373859	26.508338034439888
