# Supplementary material for: Peptide-based Self-adaptive Implant Coating Sequentially Regulates Bone Regeneration to Enhance Interfacial Osseointegration
Source: Research Square preprint supplement (doi:10.21203/rs.3.rs-5132912/v1), 2024-10-01
Supplement: Supplementary file 357 [file 5_Chemical carcinogenesis - DNA adducts(rno05204).heatmap-data.xls]

id	S1	S2	S3	C1	C2	C3
Gstm3	0.0081228983791406	0.0080650039932596	0.0082522090443715	1e-08	1e-08	1e-08
Sult1a1	56.96358574766197	55.940946808763286	55.76065008062465	2.217519238074885	0.8830055400267588	1.3699209437412396
Gsta1	306.03792153875213	305.6026456078112	307.3784159785956	25.678036869004604	24.28845391676968	26.45302789980771
Ugt1a6	11.95986777662241	13.255842625938866	13.661682188035696	1.7875432661750081	1.681646786003988	1.7729046211086135
Gsta5	2.0317116515686466	1.2452043262262593	2.064055070764603	1e-08	0.0248081056759544	1e-08
Gstp1	500.321704418056	516.810635737434	494.17870100634735	106.72428525443492	104.0905111195828	101.34004741539319
Gsta2	0.5231234668357057	0.6287413149745243	0.8671046223774811	0.1113551636633611	0.1633872819867511	0.1110500790474626
Ugt1a7c	3.660502160538111	3.4786520679804966	3.2831468767102447	1.099779707841323	1.034401172460291	1.2022249182832636
Gstm1	45.53356173657048	47.60950914159571	41.930834386865364	17.383676510575278	16.833479050644716	16.562118897759337
Gstt2	8.915766994142976	10.588618807247506	9.458328754669271	3.640612021513944	4.239471827179759	4.166588951125471
Mgst2	75.23429643871205	72.3663347352602	79.29501471889036	40.535484855496456	38.940315416410634	40.39656830118608
Gstt3	2.7164583350990688	2.5384444997557747	2.2874538954129866	1.3806672833352938	1.5660452938484712	1.3329414829531325
Gstm2	190.81332753780092	209.34083083854833	197.98897462861916	134.8681416964187	122.22953430163864	122.6735895171186
Gstk1	15.442317156866364	17.245510632799856	15.366339812473305	10.889714702697928	11.513611450671727	9.475777362165873
Ephx1	45.319731234279345	45.19775983300025	45.16997640846202	29.85443993719645	31.594232956250934	31.69423714606367
Gstm5	57.71216179150389	55.46675787139734	56.18557516785085	40.29845609223954	41.1352242235911	36.660305605650834
Nat1	5.94566764578024	5.552284507212363	5.958692563943132	4.232591641354393	4.362722925723599	4.601776200049588
LOC100360601	0.08426413678005369	0.016732719957545703	0.051363341418526	0.0340802349645873	0.016668225173025603	0.016993436936088503
Ugt1a3	0.0424531155583955	1e-08	1e-08	1e-08	1e-08	1e-08
Gsta3	1e-08	0.0320292436380814	1e-08	1e-08	1e-08	1e-08
Ugt1a1	1e-08	0.0208140493894216	1e-08	1e-08	1e-08	1e-08
Gsta4	15.901209083811368	14.156232477308597	14.978628608764915	13.38656579447718	10.072620361871397	12.276297476840226
Nat2	0.8755713129800793	0.8380599471394355	0.7295260180965961	0.5445560387887035	0.5202110590985456	0.8701728708121872
Nat3	0.11420364163277369	1e-08	0.0515651980264587	0.0128303197736455	0.050201172525404	1e-08
Hsd11b1	10.368639398327065	10.318870901885056	10.721361706846377	9.387804126579606	8.274240952199099	9.264051653899905
Gsta6	0.4437573084919873	0.523725548151401	0.5699065638758779	0.465620481028729	0.4223341536432639	0.43057426993826997
Gstm6	0.2286746508052204	0.2889661248945785	0.4646299702419197	0.27325519392370007	0.3289740899733238	0.1257722567701727
Gstm7	7.089756423830128	6.436418892801024	5.610881052551473	6.019994090593286	5.578682051036465	4.956837872817468
Mgst1	51.87658773490025	57.53424392368	55.479048761836644	49.45046317094978	46.5257799760386	48.6260027746506
Cbr1	9.75926620687095	6.875835550131843	8.776882790908942	7.07148221030167	8.883788649974605	7.052108159259232
Cbr1l2	1.1176119763092083	0.8463404796526641	0.3463943170865396	0.5362864300427473	0.4683768563620199	0.8595275444273607
Gsto1	37.64005338831383	38.39298650302365	42.06318219626341	36.79711499758453	36.0373128192774	35.43851973402807
Hpgds	0.0152861427470594	0.0455315609819595	0.0155294872203634	0.027048025859160503	0.0151186945178185	0.0192670894425471
Cyp3a9	0.9725651130885821	1.1760918802387672	1.0387167754429318	0.7312263218389224	0.9002503992687586	1.2698537484758559
Ugt1a2	0.1270177281503536	0.5359778070531698	0.4516391378508749	0.5137171247992344	0.10468862116719259	0.2561548407040264
Cyp2c23	1e-08	0.021647760911926103	0.0443004892161013	1e-08	1e-08	0.0439701110040597
Gstm4	8.724759852552545	10.708853470305307	10.236238399082136	10.129926645841307	8.572564630310662	9.270908699893225
Gstt1	2.353354628552995	2.6142899875421732	2.1066637354923627	2.5550451447686897	2.2035652138620483	2.129854389266712
Cyp1b1	83.85870859884001	79.23995443960555	84.06546499133611	78.4142971896172	80.32492930095164	85.10490384684269
Cyp2c11	0.11873742558810739	0.04912131691674	0.1909937601347753	0.0800379808737907	0.0587183777010472	0.3791387747796781
Gsto2	0.409320566576471	0.2477124366352509	0.4079159635853361	0.4927016489039893	0.3007358843516426	0.4795593302362438
Ugt1a9	1e-08	1e-08	0.0107967605450372	1e-08	0.1366449606890991	1e-08
Cyp3a62	1e-08	1e-08	1e-08	1e-08	0.013039454497829	1e-08
Cyp2c22	1e-08	1e-08	1e-08	1e-08	1e-08	0.0680997385944223
Ugt1a8	1e-08	0.0105518311357054	1e-08	0.0214913547375427	1e-08	0.053581169886006405
Mgst3	6.742804274128404	6.1965325140794745	5.989894209068197	7.895891601215947	8.747170253317192	8.348611823422488
Ptgs2	7.521698256981188	7.328598579561964	8.223329540142826	13.910245916843278	14.178500391086704	16.155098769934103
