# Supplementary material for: Peptide-based Self-adaptive Implant Coating Sequentially Regulates Bone Regeneration to Enhance Interfacial Osseointegration
Source: Research Square preprint supplement (doi:10.21203/rs.3.rs-5132912/v1), 2024-10-01
Supplement: Supplementary file 361 [file 6_DNA replication(rno03030).heatmap-data.xls]

id	S1	S2	S3	C1	C2	C3
Mcm6	12.550350542544189	12.041232614052474	11.35456413451825	6.254505147875331	6.206435392620653	6.073443796576212
Mcm5	7.180974832146778	6.594116135342572	6.2531064842034185	3.73411426105411	3.569945485320273	3.5323259386390427
Mcm3	6.460632922740817	6.84757050684871	7.2198298151234175	4.205252189186788	3.5703351110201718	3.6562818706742166
Rpa1	24.73219407314975	26.08167812960536	25.38747117063521	15.179943638339742	13.050255328275787	14.335194193308284
Pole	1.7805606873116353	1.629654774507568	1.8089059599437602	0.9296343663966137	1.027816305339133	1.0250191734391854
Pold2	9.229697308181544	9.22213489477395	8.733250350323644	4.861791389606382	5.683621969321193	5.073156581863652
Pcna	38.619992709025105	37.71646586305575	35.41914970491197	22.93004206155065	20.652996295704575	21.529353482486098
Pold1	2.8086191418188577	2.846697086673568	2.582528193363021	1.965531600677972	1.575402637110034	1.8290330665107208
Mcm2	12.154725901724852	12.346643413552636	11.60718484091374	8.134104769820254	7.914958269761027	7.673342680926198
Mcm4	12.913458511791037	13.159381875668604	12.434623109717299	8.812197981919208	8.248145732098463	9.367251267028404
Fen1	5.149512131468123	4.582592609810819	4.572708677406326	2.8637065493370626	3.4425603990885465	3.5481905971447634
Rfc2	9.390707531510621	10.339237859159946	9.020685090378633	6.753092493125236	7.28007206569239	6.797092750617763
Rfc4	7.7547968629324355	6.716987864386223	6.946018916877165	5.657874135912343	5.534392077575538	4.426813552727879
Pole2	0.6641977918360737	0.8221886872582043	0.7448774665461411	0.3052632272374472	0.5886703633511725	0.6001558476390193
Rfc5	5.500700999948267	5.32900665465081	5.422578392694733	4.287556928447136	3.871367807106238	4.09640550003508
Pola1	1.981167705745452	1.6946869052221216	1.897694701422059	1.3207810712884873	1.274729198333559	1.6420625425683097
Rfc1	9.818640779772503	8.479864755946847	9.624069110133071	7.064172333666111	7.368712637700042	7.154271701478227
Mcm7	8.000859609380992	9.017326170682873	7.7254776435256876	6.413514491920223	7.0488220319246135	5.805408585375058
Prim2	2.134711479995952	2.12797470530411	2.16869458395808	1.5195380607109938	1.8410774082495551	1.7995077101975236
Ssbp1	12.412456686928948	11.784689830991972	13.529750274991574	10.41459246137026	9.868942907007728	10.0817800678306
Pole3	11.843665078393085	11.804479434743778	12.485729571042224	9.653921989002901	8.947637725226736	10.50019209082674
Lig1	7.288106599742916	7.036054009034443	7.727769765843312	5.9360368875324685	6.044401926258905	5.8542169256418415
Prim1	13.709128818863643	12.666900881246224	14.94676714373323	11.489743658215163	10.916763600220992	11.142899618548919
Rpa2	2.416785417131525	2.5117474566096942	2.372354092644646	1.6883354389521803	2.011586677832641	2.240726615302858
Rnaseh2c	5.802721595779718	6.998703637884328	6.172047696574856	5.749076117718596	5.276943098124731	4.476705918475837
Pold4	21.305604510808138	23.652227485111002	20.281324360756823	17.665232813063678	18.701889270102924	21.700847004932804
Pola2	1.963866513742568	1.8388448255086247	2.1868327567584567	1.5899662315068168	1.9838275617399599	2.0013923405897485
Rnaseh2b	3.3384938935849644	3.1614184989226106	2.8230994972578616	2.705679157962788	3.060163866290839	2.983659838523242
Rfc3	6.7865133513944995	5.831085922961267	5.947496314963551	5.994765250916537	6.269611339255384	6.015940758397975
Rnaseh1	5.953380944334767	5.860571912951978	7.0103609867513965	6.258955039835634	6.28963194686141	6.42940240045863
Pold3	1.6486203487563624	2.537506063230429	2.6768588237578435	2.0381819043552265	2.527725465435042	2.6496364248676283
Rpa3	13.877972438659933	11.363471503165695	16.083189617853083	14.72514786237283	14.742686563363145	14.166517501365893
Rnaseh2a	5.0488336130917695	5.790242675810701	5.718929205770262	6.251506270679117	6.702542110163454	6.506622356640669
Pole4	10.94828651102358	10.087056153189419	12.158840325118819	13.242692594853885	13.141992511312276	14.358372090947197
