# Supplementary material for: Peptide-based Self-adaptive Implant Coating Sequentially Regulates Bone Regeneration to Enhance Interfacial Osseointegration
Source: Research Square preprint supplement (doi:10.21203/rs.3.rs-5132912/v1), 2024-10-01
Supplement: Supplementary file 365 [file 7_Cell cycle(rno04110).heatmap-data.xls]

id	S1	S2	S3	C1	C2	C3
Cdkn1c	3.916359529756604	4.346567958548879	4.115901947815346	0.8648019163019588	0.8570584028202359	1.1120841140066717
Ccnd1	235.5723156204571	230.54435733474	240.2908752556232	78.22491203950719	78.42743659374106	79.86520360317166
Myc	24.14329141263275	26.62129858575274	25.31851833978461	9.374135501246785	8.739567980119672	9.582928683993252
Orc1	0.7782891359688053	1.0303226953929707	1.0756082991222375	0.4820883566266923	0.2149790185463816	0.24038378398192228
Esco2	0.9831567316461932	0.938363033322372	0.9730322072584509	0.3655658841346078	0.3764078693854968	0.5308568227918485
Mtbp	1.4194210648681915	1.2165221988122084	1.438616264865983	0.5551226903577144	0.5628733585193226	0.7291340700260377
Ccnb1	6.127544165985409	6.593853348265486	6.1074971496636286	2.7430520308091944	2.7189612323887493	3.2315807696778416
Ddx11	1.1211278331626464	1.2368191119755774	0.9567393367068249	0.493740137880265	0.389328407123312	0.6179964485438024
Cdc20	16.60411794333861	16.631549700186856	16.25825091022395	7.5171005888927915	8.026299970205978	8.277111272570885
Ccne2	1.8764803973981519	1.5811887567442018	2.351586318753554	1.1359038585003443	0.7997571381728963	0.921171333537607
Ccnb2	7.447181988892004	8.610654803173198	9.166180011029903	4.11894332830067	3.8874019270503664	4.428569295804054
Knl1	1.9375164146164698	1.7168873610669049	2.446680562049351	0.8020845525956973	1.0752686196886572	1.2142170218915744
Mcm6	12.550350542544189	12.041232614052474	11.35456413451825	6.254505147875331	6.206435392620653	6.073443796576212
Ccna2	8.507977483441698	9.338513823572733	10.056161487752584	4.665560973017762	4.663763055729668	5.098935374699298
Pkmyt1	1.4606104926269765	1.1979915219604544	1.649760040025824	0.5687219250699633	0.816519033351414	0.8415978512869007
Aurkb	5.8815742707038225	6.626176158747178	6.2287651434114615	3.5659676370519526	3.123227835191288	3.1841647991633817
Ndc80	1.9752373866805144	2.005175290017522	2.2618956656860925	1.006064982664817	1.0620569322687778	1.2417185894260694
Ttk	1.9278591372172627	1.7701097495747253	2.7382852207189865	0.8127107346053629	0.8129052053194832	1.261430158789516
Plk1	8.508179246048215	9.04787147459503	7.48090254815866	4.858141517862324	4.5278564362995075	4.082723136744948
Cdt1	1.818961053114585	2.2574959280105547	1.3537071055816083	1.0479022376404732	0.606651575185287	0.6504786413342887
Mcm5	7.180974832146778	6.594116135342572	6.2531064842034185	3.73411426105411	3.569945485320273	3.5323259386390427
Mcm3	6.460632922740817	6.84757050684871	7.2198298151234175	4.205252189186788	3.5703351110201718	3.6562818706742166
Espl1	1.3304618647321282	1.5891479603406355	1.473594530946235	0.8395153108545331	0.5408661049399469	0.9246353194537709
Ccnd3	102.36404431039183	110.64661880553419	97.42762331666175	59.48700703574378	61.07934891591518	53.58569802936757
Mad2l1	3.0640968639936017	3.187415522584354	3.1933271699179318	1.687659413732597	1.596602329088439	2.076153474800388
Bub1b	2.5936890606831686	2.500092933437683	2.6349787646519056	1.3604286159717114	1.5017559870393378	1.5746453866006593
Pcna	38.619992709025105	37.71646586305575	35.41914970491197	22.93004206155065	20.652996295704575	21.529353482486098
Cdk6	19.141701453881698	17.061484729892268	19.08589690279556	10.631079311801965	10.246962239943441	11.540284350250786
Wee1	3.3626699744502164	3.1309000646962297	4.214732461619324	2.0268562885730437	2.014820857638624	2.26986254880946
Cdc25b	5.801015644082527	6.237803499304852	6.066476584706032	3.850393636826672	3.5465330769464583	3.3318495472218994
Cdk1	15.272179921277324	17.267849429080112	15.51530227525721	9.598524579023922	9.299448489796799	10.028917301520467
Pttg1	4.751221711108227	3.72748636208867	4.0039181246242	2.031865264508764	2.619212637682348	2.9373473955613383
Sgo1	0.8864263212157493	0.9364354236618109	1.0446236191883014	0.5807876712900373	0.3857551245539247	0.6793044904715256
Cdkn2b	31.976685193230146	31.661724179646054	32.56432602440686	19.43051624789632	20.439839079621144	20.39139054758368
Cdkn1a	225.2471563782602	244.81389495302528	229.08205393192696	155.36096672887274	156.42312077928767	141.03910800197
Orc5	8.082289937182736	7.274973863313582	9.195889997451605	5.504627212351034	5.467469889777122	5.141749368396393
Mcm2	12.154725901724852	12.346643413552636	11.60718484091374	8.134104769820254	7.914958269761027	7.673342680926198
Cdc6	1.1190998154750487	1.6626886050333796	1.1123773609522782	0.8466172272433714	0.6449936270575248	0.9254801842105776
Cdca5	1.5897578156941832	1.2824720293251934	1.1336518470865338	0.6723364042134184	1.0734266107651196	0.8015105148099626
Bub1	3.1825564112359	2.836302300771473	3.579821702112984	2.074917706593962	2.3569931723379063	1.8946574783613863
Mcm4	12.913458511791037	13.159381875668604	12.434623109717299	8.812197981919208	8.248145732098463	9.367251267028404
Ppp2r1b	7.935970854646763	8.369955532777825	7.855258379420309	5.60130365104004	5.650085858785452	5.461409965462785
Ticrr	0.5627178994462972	0.29618215161073097	0.4408103904489488	0.2159349500673195	0.3319206097841085	0.2119251954549286
Mad2l2	7.203623225691133	7.13953156889208	7.161758663836398	5.206336546381063	5.0673091666823735	4.764794729650348
Cdc7	1.982097286664931	1.54322847519021	1.9846774862812366	1.3120527540070224	1.3045726775244455	1.3084580653529696
Smc1b	1e-08	0.023127857998378503	0.0059161831958541	1e-08	1e-08	1e-08
Cdc25c	2.4377000290796165	2.3724774874015107	2.5703444698093803	1.7257593665111304	1.906554337118127	1.721031227641095
Skp1	203.8080830061237	204.7934963703977	216.4827352950905	152.92457186284895	145.90405807616312	157.5800479883495
Cdkn2d	4.288959658303285	4.886356366508841	4.2769191466068985	3.777058999240969	3.147273476789866	3.228609279551856
Smc3	13.85349412211992	12.370925108765741	15.046497380855165	9.508473615346357	9.789929206505125	12.340938436208525
Cdc16	24.857475658468246	24.34137801442713	26.335618837935172	18.47113950080017	19.684514042340023	20.03728453059317
Stag2	8.359664523535637	7.521750452639007	9.680814826247142	6.474236993579639	6.2566757934926525	7.029906348411625
Mcm7	8.000859609380992	9.017326170682873	7.7254776435256876	6.413514491920223	7.0488220319246135	5.805408585375058
Tfdp2	1.6567372335155555	1.53092415554421	1.944187996380339	1.3849001805171395	1.176214812952769	1.4445099717696732
Mad1l1	5.60935989937482	6.193903657385257	5.541090408718754	4.966002223043999	5.019540812533292	3.6751996204517785
Cdc25a	3.713246637315364	3.3442592609454045	3.4537475162712363	2.67635844493424	2.890908757082136	2.7385976730393464
Mdm2	54.095944203388434	51.237151957119686	55.94125219753413	41.3831481083454	42.06084305121821	43.997829675067024
Ywhae	349.48916020861515	333.63829035462817	347.00750044747537	267.9780181024126	267.852307692353	283.6948810025157
Cdc23	14.36695109502288	13.216874250413243	13.959532259753422	10.657538920969142	10.86648046857037	11.674804710262812
Trip13	1.6672430703800243	1.2373398779132516	1.4970316734103943	1.1664175246352428	1.1659452178713154	1.2056751906611072
Rbl1	2.3566221839699493	2.1961929249441745	1.9627190341895964	1.6325798052340235	1.6107954315642976	2.013958889335339
Orc6	3.6807225610365726	3.262936511089768	4.106571427576951	2.8909065322389593	2.925323824891172	3.1480883657174514
Cdkn2a	117.78740415119711	130.26770213784158	113.29094577868348	98.41051137711177	100.541800387003	95.50305939081784
Chek1	1.2863330575454823	1.1197062644241962	1.2978598169133908	0.8908412393068893	1.0979624777509673	1.030544650760453
Anapc2	48.84798065410327	53.38330505745795	46.54091741007875	40.19850068209382	41.788627903454305	39.658657026968804
Hdac1	71.83571308186053	72.10736589458644	75.25315793427309	60.52041801455754	58.13931501861888	60.92477508017597
Fbxo5	1.663807786495093	1.7998850616997164	1.2740278975976116	1.2805550807066124	1.3999727547632475	1.201926294813649
Anapc13	38.93866434456292	42.814388242156454	39.7159351948586	33.15760601630399	33.60872028330524	32.80639445379239
Ppp2r5d	22.157600026237606	22.99966109105308	21.2129464097487	18.896167780033558	19.050189785580628	16.63404691077353
Skp2	2.541504740968114	2.191157387129018	2.177267203020953	1.788351788045837	1.8596389020160948	2.1047948920469612
Ccne1	8.599725395166304	8.181705480210532	8.018386748114342	7.007798397909125	7.336299120907801	6.427641059859253
Dbf4	2.776067138471149	2.170796659492252	2.7465278812161764	2.0272184492009977	1.6509835297435183	2.6620105732009574
Esco1	2.642676628529942	2.259980532288331	2.8419424119352805	1.9721256333914439	2.18683257727925	2.3732058707959034
Bub3	29.25410827491814	31.238594209508534	32.10493008080615	26.22148738453909	27.8184682821865	24.63891715619273
Ccna1	0.3155446143597987	0.1904346016385955	0.0942846724549635	0.13137406769272938	0.15910372054889618	0.1434916722523393
Chek2	2.1578913655332435	1.5996125815084716	2.25176139913644	1.6586178039466408	1.487217212881465	2.008517959864623
Ppp2r5a	12.997481892088985	11.67322447265926	12.787411834265553	10.365980916890543	10.744160719113362	11.257294374611044
Anapc4	15.862471949789281	15.718424527672587	17.668778379934	13.734878757658027	14.250115504378353	14.672925887714637
Nipbl	8.422059250754938	7.948602477925196	9.732003228361133	6.807766200131745	7.003548482676004	8.855263812001816
Atm	2.2861987022173063	1.9787482266289615	2.4174705561128826	1.8885665507921943	1.9489531255317936	1.9662616253974488
Ywhab	121.34647770286459	118.38566336037469	122.43826347839826	103.40496654173793	104.71493499624876	107.88439955571583
Ppp2r1a	106.93804625204957	112.42588843419584	103.04062741364869	97.40272612049104	96.45423553572935	88.34465525697485
Atr	2.22096093158003	1.7613487421297673	2.205549932337465	1.7235307680138707	1.6831692374587768	2.0127418230732803
Ywhaq	146.0062871033302	146.3992943674979	144.73207163788854	128.7289980150544	125.42859712295443	129.6616691240951
Cdc45	0.9487788451559008	1.3720676509874294	1.0162676671390563	0.9384678773284141	0.9485855220136726	1.0502840907341684
E2f1	1.8111527332213584	2.038009952455324	1.8399850096903843	1.70919490419286	1.8489643498676527	1.4610104137508622
Anapc11	13.865875965250021	14.509526459919002	12.31868447631793	12.203874074632324	12.379913407791875	11.338874164644032
Rad21	26.181174535131372	25.41295026313539	26.949624259130438	23.14039611158748	22.83287747954576	23.513298928400694
Abl1	27.45046672644505	28.236540349026356	26.769231247581224	23.51127377149769	26.10909383296952	23.53715489049151
Cdkn2c	7.039024127469023	7.152912407622732	6.160672584085059	6.565913275028403	5.556459457421031	5.948114489928816
Anapc1	13.423269959124822	12.689332268851802	13.173063936902134	11.772070477971317	11.37890314021283	11.744962548591207
Pds5b	5.588967632713781	5.495054035540369	5.856240292213861	5.152363835604668	4.743624939608955	5.18401591696516
Ccnh	8.186992476910083	7.7796060353457035	8.11097781899326	6.627119572377236	7.007881891398085	7.829927511198692
E2f5	3.0445252778532863	3.543564915352861	2.885059743973069	2.522185216556681	2.6063109324899	3.340801249820613
Rbl2	6.309612616299398	5.504700997173126	6.549622994178767	5.357784237234244	5.337904392492974	5.76527656054806
Fzr1	17.474895653120573	18.63458671639924	15.272479098147551	16.37460776482887	15.57339961172491	14.759321756561732
Prkdc	2.7664591735869277	2.608777550275298	2.7848325963567597	2.5070822402944533	2.307793860872996	2.614852085494156
Wapl	11.018840503183357	10.125882752338052	11.970225597726373	9.804875952476596	9.22958583242129	11.211228719922097
Rbx1	58.2335244224228	55.90813974295322	54.65218904219349	47.64738163533418	55.2629431210627	51.85077635142044
Hdac8	2.158987404503151	2.5337435172577525	2.2740940298903443	1.8928092227451052	2.2707063320981757	2.2304229425838957
Tgfb2	34.06262770245064	30.413957780311883	33.81103051467641	29.556495985047636	29.655117690102568	31.160400455547048
Tfdp1	19.959748491933755	21.230550159654744	20.80197267620412	18.213490420471917	18.388690280400454	20.435797557236
Anapc10	6.757854796183895	6.326521891684669	6.325261261580237	5.688348750557935	6.013748363326188	6.191614508068234
Crebbp	3.5835240921886493	3.65836515699468	3.6108989054446017	3.5347521787580263	3.099846772857092	3.651934057866932
Ywhaz	370.7916854944618	355.81138253946335	382.24252635746865	347.76989943784014	339.3318495094366	367.4872596998657
Orc3	3.983371613012445	4.17116953226941	4.4414864974661485	3.5355160995804087	3.9988539002346988	4.498769260493808
Smc1a	15.461726608566885	14.998135438239707	15.32788681154698	13.535254401206284	13.943906888318985	16.70999390293673
Ppp2ca	54.710468318585704	50.82520810818908	53.69773595937208	51.657596876362526	51.34798020376218	50.89706697366602
E2f2	0.361075499885673	0.3539058216827149	0.2445490483471822	0.3042401414653904	0.1831385618522072	0.4294370316537264
Ppp2r5c	23.505029356616213	22.73345140164549	25.151447533436304	23.447444059599675	22.074850252080942	23.84442007765075
E2f4	13.108001631420684	14.008585299236163	12.618906572784665	13.265442737827295	13.574638698810752	11.914405771004192
Smad4	24.22833533983805	22.770940511126064	23.65371612390733	22.781894373025732	22.077776423105025	24.063270861842195
Cdkn1b	16.870731492951506	15.065644018400432	17.369830281440194	13.93586550106619	16.25657971914844	18.1754259984119
Pds5a	12.842654067880733	12.505388695088325	14.476494623528597	12.419750893491814	13.007114751110217	13.80445855022561
Mad2l1bp	9.830860177488109	9.115137001412645	9.637608625762635	10.017466458698328	9.496170319924637	8.678589816415192
Cdk7	23.4079203244052	22.74012213346812	24.531137519299588	22.866365563437164	21.636586443922837	25.91083765783985
Ywhag	146.83701342174285	152.3009750433787	149.03209666789675	151.35178318241594	149.39583533931827	146.372039482617
Mau2	3.818184772125437	3.367034784077662	3.801110172178582	3.503613381359412	3.662662552641388	3.8279604585375777
Wee2	0.0098127823270597	1e-08	1e-08	1e-08	1e-08	0.009894649388812399
Cdc27	12.139019956025617	12.493954389283497	12.97146284303103	11.667435964207245	12.773536856312305	13.28499157400128
Anapc7	2.859924038899433	2.697260713567272	3.0882043280144216	2.9471978317830607	2.825580135168765	2.9083792970928948
Cdk2	2.404957343104207	2.7653021419868598	2.622892759286095	2.440623887621726	3.086949725567457	2.309119911011186
Cdc26	5.609941895567526	5.700249488090143	5.3826233208644245	5.605943215207104	5.3375816675373935	5.995819030704273
Ywhah	78.37532804028417	80.61778992208359	80.99188502331855	84.24179094736101	82.76415999845175	80.81245837758595
Anapc5	121.41261327833163	129.95105030942915	119.9412916963214	132.95532084224553	128.9233609922656	122.27907051783244
Ep300	8.647866598402242	7.773088311417752	8.22427567948344	8.398703638627852	8.800256737578108	8.31130799750288
Cul1	12.96939417404414	11.776572618116983	13.309963222674813	12.721453322674057	12.65596671222113	14.136893062363807
Ppp2r5e	5.663349390102747	5.380591912391863	6.020603784471304	5.259720521551135	6.177097779832213	6.476159203226772
Orc2	3.0768308087541647	3.8728038903612494	4.527777713145743	4.285666836835811	3.7464576868178217	4.068038444820744
Ppp2cb	43.43996606480869	46.94470584458503	48.58109693277989	49.63599735567725	48.80403946205264	49.12318033229883
Zbtb17	5.37081519153831	6.02704259241616	5.2521113912640285	5.6743863971852635	6.313942556883595	5.764233899623218
Orc4	5.1655790522476295	4.552762880257753	6.269116273278187	5.624752695462612	5.376233655101888	6.214349947055231
Atrx	4.745747989286335	4.114703697969957	5.488515695656877	4.721865397070794	4.924858569227267	5.85034244273279
Gsk3b	12.812115293646215	12.582416230124974	12.986687460235611	13.480973494090053	13.71994594824775	14.894510353793144
Hdac2	35.90762977128487	37.23407210666978	41.19336045031269	42.182392742954185	41.40116767949997	42.09962016516593
Gadd45g	51.47050197147225	55.121796939691656	47.70145085997201	59.25429596524926	56.28040954689049	55.86793701322631
Stag1	2.2940100746073737	2.158153093512894	2.229827225802149	2.489528979898565	2.4141873133311855	2.5737349959299416
E2f3	0.9505854694056425	0.950619945596428	1.1231873076920678	1.066556859202399	1.1694497886005708	1.2033319191257028
Hdac1l	1.1004869790870284	1.7505793033845152	1.683019715151436	1.890422083935221	1.6033890142877743	1.8971747278348372
Rb1	2.4349760485294802	2.089333696899633	2.3799974592216415	2.537193073307271	2.6896938506045847	2.8998276952478252
Tp53	39.50341128406762	35.939405464852236	37.07621340535638	44.760803150360324	46.297627485826496	42.42578257351217
Gadd45b	9.399896243117652	8.965359845795794	8.327302820101998	10.734176729269118	11.389062912884405	9.611628403853947
Anapc15	10.627807584701964	10.33449160601582	10.277551751963525	14.500215829187393	11.306063216527937	12.766475814119609
Ccnd2	23.343308466521894	27.58287835264045	23.23857769938655	33.62626384502021	30.67305232479705	27.978884273439746
Anapc16	10.8326939961789	11.627552400900415	12.380785715372841	15.985574464795954	14.967065386406121	12.63902544969479
Cdk4	94.60685663186159	95.4238353010622	89.50673794187635	117.49132124537799	125.02865519186156	113.57024263935315
Tgfb1	46.52762031674919	47.067321560690544	39.67367879865222	59.105741163966144	61.31975529040857	52.37264547690011
Ppp2r5b	5.384117789095869	5.330976237397608	5.084523510079414	6.23347545384082	7.546398319790081	7.123736380271432
Cdc14b	1.762879087718038	1.6347542774024735	1.7217276982823144	2.0666320429802547	2.136642978957541	2.6305992058689487
Cdc14a	1.6655873219689232	1.2581586918270564	1.8432699392563683	2.281053786136761	1.856226919867725	2.2312442008857203
Smad2	3.9879850702323214	4.471755155399183	4.3314604146916915	6.04250153620858	5.328182698171207	6.132831767890759
Smad3	8.852821037621876	9.252478082339044	8.530896704393243	15.927370346651314	15.7972949497784	14.943805055212568
Tgfb3	55.64553443251943	59.20015784129221	56.74783369997554	128.95670240365047	130.1598182580928	128.60339404994602
Gadd45a	41.266081038575784	42.464321000404574	45.61159810809478	97.87732441937403	103.48309549641492	106.89965283300532
