# Supplementary material for: Peptide-based Self-adaptive Implant Coating Sequentially Regulates Bone Regeneration to Enhance Interfacial Osseointegration
Source: Research Square preprint supplement (doi:10.21203/rs.3.rs-5132912/v1), 2024-10-01
Supplement: Supplementary file 369 [file 8_Fanconi anemia pathway(rno03460).heatmap-data.xls]

id	S1	S2	S3	C1	C2	C3
Rmi2	0.6771380217944445	0.6866163528882783	0.9660119200375052	0.3059133162306514	0.35623430142228457	0.2397019387775319
Fancd2	2.4244378466715375	2.6791533799957397	2.9407966887299417	1.177216805139563	1.3727975542928463	1.427205390257112
Fancb	0.4223140843308677	0.3624493243917596	0.545386048716967	0.1736978917723529	0.1415891413065356	0.25261541797525877
Rad51	2.346924697901211	2.609501910660228	2.2454749112030994	1.1214892867114479	1.2957472258351872	1.256192661393989
Polh	4.251937306781327	4.686399279081655	4.546079946953976	2.287642128916167	2.6180160375589483	2.5229979896415164
Rpa1	24.73219407314975	26.08167812960536	25.38747117063521	15.179943638339742	13.050255328275787	14.335194193308284
Fanca	0.88516709879234	0.8625830816432289	1.1407258491709913	0.5883822947598505	0.5633816441668463	0.4669369133416588
Ube2t	3.2081713242327017	3.1139928626148463	2.4322710124613773	1.694534957051148	1.3260416377185598	2.003729516725956
Telo2	5.935606737376414	5.241638618876261	6.022849705124752	3.6067125796930766	3.563276711006629	3.747898016734416
Poli	1.9077238660583724	1.8607011478619648	1.5105728670618248	1.0949483752277656	1.1265462162972752	1.1711571955349107
Slx1b	3.23854438134118	3.085495966452803	3.033984181178399	2.0539371553243018	2.047470458367961	1.9945356481743288
Mlh1	3.0881005603426805	3.9113373154092486	4.154750981106127	2.1688153133729364	2.8231385622701937	2.449012195391082
Poln	0.146523646294524	0.2036710526144336	0.2619869034235379	0.1481519780545956	0.06956092777653759	0.1122870228858625
Blm	0.9449744491361981	0.6951721400910472	0.8505856999612609	0.5396211899216024	0.5907979344847646	0.5578911240422052
Palb2	0.4750993387969381	0.3664848389127225	0.4418219062041704	0.3030084000424536	0.2819369911408979	0.2984931343188087
Atrip	2.5377471462634666	2.040777109601204	2.6007616126162154	1.8606884441367648	1.592569355981797	1.6311240263756104
Brca1	0.6395991068216977	0.8326806294901333	0.7293461024966188	0.4718321763974695	0.5809525482108846	0.5067348206617265
Rad51c	1.6376566096280307	0.9735193950630252	1.6319359892990422	0.8753888721685814	0.8975503543501262	1.0728317343219627
Pms2	5.476700269600825	5.675755999993454	6.192573106668508	4.544243401002534	3.7794538176255768	4.32899363596814
Eme1	0.6036939947783452	0.7230751897922846	0.3699296288365176	0.21315657690720288	0.473873792235957	0.3285212583759416
Ercc4	2.137064479292692	2.23845851644252	2.4135998586786807	1.8734716183209275	1.8100977599828418	1.7498960412215785
Fanci	1.9568371331261063	2.0256699180336244	2.187285704717603	1.5769163016246894	1.6492142577535909	1.7605162247665262
Rev3l	1.6271835499023464	1.3139079390464972	1.7016612914471416	1.1711803048315925	1.232570658321105	1.3732608462633884
Rpa2	2.416785417131525	2.5117474566096942	2.372354092644646	1.6883354389521803	2.011586677832641	2.240726615302858
Cenpx	6.7093717332327225	7.211291647343117	6.286768154051133	4.544576913977889	6.539236585755847	5.583053687695679
Ercc1	14.245748538600981	14.863629691058472	12.645390242895077	11.434287947094095	11.799001440212631	11.233351666678164
Brca2	0.4378336566654733	0.3888388348729433	0.5029187098910222	0.3492653149532388	0.3307623248440207	0.4414864627221416
Cenps	7.592635707305903	6.167880492259593	4.939082335378416	5.522594639717772	5.253656651703263	5.325899392453722
Fancg	1.345788787241064	1.650036771559884	1.3769438491300718	1.2881070565225776	1.2268366120202583	1.313553415723223
Atr	2.22096093158003	1.7613487421297673	2.205549932337465	1.7235307680138707	1.6831692374587768	2.0127418230732803
Usp1	5.444652771273674	4.867918750233857	4.953732155835047	4.551563275344645	4.055296716496018	5.254017189213072
Fancl	0.7853955012534	0.6642721503907751	0.6402888772941427	0.6601357353070946	0.5466314645994089	0.7104718549705942
Fance	4.344394383292233	4.136857336628425	4.155451506254536	4.277077384746964	3.8193820189606766	3.9451371196153295
Wdr48	14.471028046788446	14.876751184821535	15.283326909614425	14.461141152154552	13.6445916127031	14.567438912243412
Rmi1	9.364468824174903	9.47448814145004	11.201625994523646	9.84655854126285	8.997765742744068	10.310261370473004
Faap24	1.246222095536584	1.5635476612721995	1.3236093040906447	1.1569747285645393	1.3558277231532152	1.5079430528550188
Slx4	5.266797950656163	5.2578176725068015	5.090901780291518	4.863239832732094	5.319734336004045	5.310738364014974
Hes1	4.515446248118429	4.123495202539629	3.610397805560607	4.269706593519517	4.383279502146036	3.5834726618700046
Eme2	7.764719421647192	9.002563773935837	7.379403883934567	7.81724173878652	8.802710133799598	7.677961060361942
Top3b	10.190374731245877	11.117028146517018	9.410841492065407	10.81913719926124	10.838418364713968	9.841408673823093
Faap100	1.6638265495868105	1.6475271593994159	1.3177175132413068	1.7953757449709464	1.6102113065222443	1.3845598527423064
Fan1	1.6632142700282908	1.3216156072471095	1.5736264019391812	1.6011051929469364	1.521488980172854	1.6717321984434004
Rpa3	13.877972438659933	11.363471503165695	16.083189617853083	14.72514786237283	14.742686563363145	14.166517501365893
Ercc4l1	0.8924274850276893	0.9306889453555749	0.8935892045132848	1.0451623321413357	1.0160018459262903	0.8933990199344404
Rev1	5.055291213911792	4.682918358224877	5.096058345943909	5.401296852677156	5.266232710291969	5.587944973771258
Fancf	0.7144652809057803	0.6676452351431105	1.1869603471649555	0.8923828974513234	0.8895336017773541	1.127254793248915
Brip1	0.5453448320763438	0.4396453764534289	0.4782620536316231	0.5184152430981283	0.6269611429255384	0.4652954272589059
Top3a	2.1136607876513143	2.134868091557181	2.126100791563049	2.3323959219747	2.436344196498494	2.641753140326789
Fancc	0.1244832420585372	0.0955060106378796	0.1302971977150968	0.15447268811434078	0.1455050044887587	0.1198162586257671
Mus81	4.40664130445736	5.276017206782104	5.003473334583348	5.967698518746362	6.1431321212323855	6.836008470942751
Polk	1.304080380800458	1.0219177115605804	1.4179077240452533	1.5692105504723082	1.8600764708596367	1.6301159530044012
