# Supplementary material for: Peptide-based Self-adaptive Implant Coating Sequentially Regulates Bone Regeneration to Enhance Interfacial Osseointegration
Source: Research Square preprint supplement (doi:10.21203/rs.3.rs-5132912/v1), 2024-10-01
Supplement: Supplementary file 373 [file 9_Mineral absorption(rno04978).heatmap-data.xls]

id	S1	S2	S3	C1	C2	C3
Tf	86.09698184087955	92.56079599295572	87.63550951687795	6.246479986657218	6.273634034133513	5.948107220563589
Fth1	14914.332884871563	16299.8905266539	14676.117161457576	3809.538481670412	3841.849768844073	3548.319284142597
Mt2A	969.3850750049324	965.7292289805079	972.0671400553969	258.2916224942214	261.64288846732154	257.2099366975029
Steap1	164.5241627057306	169.5423709445869	163.31449189854385	48.760565879958115	45.666742530296936	45.60271086434052
Mt1	225.46047685247464	236.4241586276251	213.89922669743578	72.25489547573004	76.27679491240092	72.24106742081145
Slc40a1	8.499873721608497	9.131150020092925	9.209930231925037	2.8810550419167114	3.227596867943406	3.005341039466297
Steap2	88.79620978434816	85.33210936491164	89.59990076937277	33.67665429500309	33.050140960630586	31.809130892262893
Slc9a3	0.0034356193478228	0.0034111326770678	0.0069806136605754	1e-08	1e-08	1e-08
Atp1a2	0.15225668334985148	0.0916190960886663	0.0984330506276702	0.018660460535949	0.031943091883613904	1e-08
Atp2b4	0.4525182862250334	0.6034882888996782	0.7154254466586244	0.28968963004134607	0.2118633352796652	0.2753961441412253
Atp1b1	30.97622740891614	31.267685187816934	29.20905746500118	13.91054848397049	14.584953101436477	14.479356266556135
Slc26a9	0.5674945299426923	0.6751683139584499	0.780301694638813	0.3462593204614845	0.3870883127785288	0.3157126029944392
LOC100360087	17.95211423563811	19.411948569571518	14.621764061855565	9.388767867891238	9.05630613519156	10.091281883572258
Slc8a1	3.059066726587069	2.7973245439318766	3.1252054264307785	1.6730443546162224	1.5248597967534596	1.800286341709458
RGD1563815	0.251684582239836	0.21701038683401638	0.2691486557548869	0.1272407939761763	0.1506666878507196	0.0667853662103621
Ftl1	3550.724809984261	3383.20598950582	2984.75692629994	1822.522812197148	1926.2764799390402	1863.586854963693
Cybrd1	6.406803743962596	6.958140668265238	5.336229362860681	3.7107008617155937	3.9646609978863325	3.5402476869888697
Atp2b3	0.0022507913331933998	0.0022347493051665	0.0045732343753503	0.0022758044902683	1e-08	1e-08
S100g	0.7857816347299257	0.15603623228109578	0.3725356770362857	0.1589028288337786	0.25905800024448	1e-08
Slc8a2	0.08333210521184789	0.0275793970340979	0.08062732762809789	0.008024597912727499	0.007849462762896199	0.0640208307681031
Atp2b2	0.0026806643218832	1e-08	1e-08	1e-08	1e-08	1e-08
Slc26a6	1.3894660134143522	1.3226736619072688	1.6735290025284015	1.2166207451241997	1.0200584775760868	1.275877744216411
Slc39a4	0.0850969358767119	0.0528065182891998	0.06483871677720489	0.043021318243706405	1e-08	0.0858068917437716
Atp1b2	0.023853152671452403	0.0789437893497373	0.14539721747420228	0.0803940934037026	0.07863950737441569	0.016034774838955303
Atp1a4	1e-08	0.026474624290936603	1e-08	0.0067402571952766	1e-08	0.0067217906433571
Atp7a	8.636132603246287	8.179584373518274	8.396000251601698	7.581136440358311	7.47312089688972	8.072784370832562
Atox1	78.815331460193	86.93253754531702	76.0689549271618	73.62089004049885	83.93731111767637	67.94664925507477
Vdr	8.580745613645627	10.730075612844201	9.070750923341883	8.465063919482642	7.638074928636268	10.441262501071296
Clcn2	2.4611351533084553	2.4609653876846074	2.11519513229568	2.1169821616025937	2.232288674311597	2.252319698599337
Slc11a2	10.98020247563914	11.514748875580608	10.589356903481297	10.722551358603509	10.326317831269833	10.127397894577248
Trpm7	12.394347952991687	11.436246900850536	13.293031744456098	11.768176825632423	10.384039018878777	13.039562958742529
Atp1b3	142.93057764981774	141.43963513925	141.79746450909698	133.83505088589595	133.41874663657535	140.3770539044432
Trpm6	0.0847596813763056	0.045083347043630304	0.0123012936688023	0.0550939047426754	0.06287340410382519	0.0213667133899809
Atp1a1	167.4993088602869	172.2669075775034	165.77948423744982	177.83503793082298	173.58669399106157	166.7560638834784
Slc31a1	20.127365615678087	19.227606296961802	20.95376490841313	20.688745931152756	20.66607071189264	20.773865190831206
Slc30a1	12.973124172463212	11.871825669878794	12.073662799574464	12.54857387799532	12.355458198515352	13.300905023382107
Hmox2	15.028443214059115	15.881561013119695	15.565753062879148	16.33813649551853	15.648386616312548	16.139973216510406
Atp2b1	7.878020116555025	6.8894431661306905	7.982496915642363	7.611345590281128	8.181890711711276	9.125214623223739
Hephl1	1e-08	0.0044703384826681	1e-08	1e-08	1e-08	0.0181599376251792
Inhca	0.23638822589213068	0.0586758606414769	0.23014505364804058	0.3485638749404296	0.3117316881111613	0.11918020057506379
Slc46a1	7.388411458543304	5.645774945116428	5.994576676833086	7.62349953422702	8.492136122154832	6.674534910815943
Atp1b4	1e-08	1e-08	1e-08	0.0034567466499599	1e-08	1e-08
Slc8a3	0.1161134974113678	0.18179702190200359	0.09981395279810379	0.1986834791918892	0.17667931832215	0.1981391373460951
Hmox1	182.4629089033856	195.83333053188144	187.53347604882936	256.40644083247014	267.26417318913246	244.55506837417047
Slc34a1	1e-08	1e-08	1e-08	0.0098200912295416	0.038423049078098404	1e-08
Slc5a1	0.0093886775754143	1e-08	0.0095381385544579	0.07594404818436999	0.046429118481564204	0.0094670063700255
Heph	0.4977143687822036	0.3996307076060529	0.4836533866363978	0.8927137807320454	0.7062893506117097	0.7768024487582517
Fxyd2	4.558940803507712	6.45632863421601	5.600902985279868	13.793080909287072	12.618212064976804	11.8666114927658
Atp7b	0.024901516112996	0.046357557305807304	0.0158112103512179	0.1919840826035206	0.1847154745834178	0.2479539238650128
Atp1a3	0.0719504011262834	0.0649432627357783	0.0465155131769064	2.2155676737026484	2.4001078829324496	2.4403406157253182
