# Supplementary material for: Peptide-based Self-adaptive Implant Coating Sequentially Regulates Bone Regeneration to Enhance Interfacial Osseointegration
Source: Research Square preprint supplement (doi:10.21203/rs.3.rs-5132912/v1), 2024-10-01
Supplement: Supplementary file 377 [file 10_Separation of Sister Chromatids(R-RNO-2467813).heatmap-data.xls]

id	S1	S2	S3	C1	C2	C3
Clip1	14.929776150279931	15.036566615557177	15.255687515000101	5.7206526081480655	5.750907895329468	6.094231815302344
Sgo2	2.199520901654152	1.4808653470148054	1.8630957520912732	0.7100255792530247	0.780628087270033	0.7783031287284788
Nuf2	7.508051723087072	5.913583434743948	5.713942828420977	2.669092586743365	2.7945173286305387	2.608276841829059
Spdl1	3.8093103928158176	4.1575607557987375	3.9179662245516793	1.089546842849893	1.8136748242561247	1.7346863181146555
Ska1	2.1255695605125626	2.9638986110938546	2.4610890088271735	0.9955812353268825	0.6956091877653761	1.3080452127405744
Cenpi	1.9291406714277248	1.9875462208193608	2.335713111169468	0.9819697732618664	0.78411303404356	1.105852957629448
Cenpu	1.8542297631227975	1.5487896271393962	1.6744424860760836	0.8332604513342873	0.7131903602715653	0.8012997624182977
Cenpm	8.366304277568934	8.437283087092917	7.323459897477765	4.415850492494844	2.2117795622650935	2.838563163818753
Cenpt	2.8422815718145333	2.7109204389441555	2.523745552336556	1.221959682997753	1.5273158133544122	0.9478092004523513
Cdc20	16.60411794333861	16.631549700186856	16.25825091022395	7.5171005888927915	8.026299970205978	8.277111272570885
Cenpa	0.6747355560477758	0.9304534726788303	0.9139691579855924	0.450611322229661	0.3872244916009663	0.4829750244588414
Aurkb	5.8815742707038225	6.626176158747178	6.2287651434114615	3.5659676370519526	3.123227835191288	3.1841647991633817
Ndc80	1.9752373866805144	2.005175290017522	2.2618956656860925	1.006064982664817	1.0620569322687778	1.2417185894260694
Kif18a	0.7462523464179286	0.5405171158231228	0.739489564509641	0.3525335693243324	0.24804251453168188	0.419414117329864
Plk1	8.508179246048215	9.04787147459503	7.48090254815866	4.858141517862324	4.5278564362995075	4.082723136744948
Cdca8	11.910258319067484	12.786093176327137	11.10238164738909	6.201157049792885	6.276925294779472	6.930285118313554
Birc5	3.892487234021695	3.99314106925691	4.716440488945464	2.4059038215360826	2.4685071467523163	1.9820405651453183
Tubb4b	197.2372854152425	216.9522282971692	191.96172547609814	113.40967416120797	116.00986648995624	109.95135181482904
Espl1	1.3304618647321282	1.5891479603406355	1.473594530946235	0.8395153108545331	0.5408661049399469	0.9246353194537709
Mad2l1	3.0640968639936017	3.187415522584354	3.1933271699179318	1.687659413732597	1.596602329088439	2.076153474800388
Ercc6l	0.6274728300676701	0.5701043541410307	0.8238892473412486	0.18554553479157548	0.2927355389762624	0.4476706008475837
Bub1b	2.5936890606831686	2.500092933437683	2.6349787646519056	1.3604286159717114	1.5017559870393378	1.5746453866006593
Cenpe	1.8181163326766647	1.899050492665623	2.500968097216545	0.9530893727448336	1.3848555400191132	1.3626596114462222
Kntc1	2.105546315453509	1.871877614572824	2.0034667076714667	1.3495692342177366	1.1055964272158727	1.1238029212596234
Pttg1	4.751221711108227	3.72748636208867	4.0039181246242	2.031865264508764	2.619212637682348	2.9373473955613383
Sgo1	0.8864263212157493	0.9364354236618109	1.0446236191883014	0.5807876712900373	0.3857551245539247	0.6793044904715256
Ube2c	14.120039236033772	12.324748366671969	11.34974794861532	8.001371306977425	7.397039326726524	7.948157638678813
Tubb1	0.0078301090824057	1e-08	0.007954758748129299	1e-08	1e-08	1e-08
Cenph	1.8894912956913408	1.385891824672067	1.6774626561475725	0.8950040487896317	0.9764866055786181	1.2530056417037567
Cdca5	1.5897578156941832	1.2824720293251934	1.1336518470865338	0.6723364042134184	1.0734266107651196	0.8015105148099626
Bub1	3.1825564112359	2.836302300771473	3.579821702112984	2.074917706593962	2.3569931723379063	1.8946574783613863
Psmd5	24.84937545407105	25.12127143210949	27.330054709939184	16.941852294213874	16.984968410150618	17.070821104024734
Spc25	2.908607516279652	2.256822362349511	2.714140015985928	1.6120659743167205	1.8112844477057184	1.7923117476973323
Tuba4a	17.331578744121035	19.700186274587402	16.52156107619932	12.689595261702452	11.468719645829385	11.519262613671804
Cenpn	2.6132840048973693	2.9560571402413154	2.6738491154177106	1.8590648635323852	1.7354128424016502	1.9104376385283823
Nup85	9.01484025284536	9.879637085463495	8.555522052498869	6.195908090098006	6.286407321413134	6.029349782957658
Tuba1c	127.3012615105606	139.6486264045115	118.80367539151443	92.80393604906591	90.12290166513995	80.8605004818448
Cenpp	1.293891792797546	1.7128930876212587	0.8982345899526994	0.9157896617123417	0.7038449977024889	0.717577641959697
Tuba1b	280.13380083499334	290.42887208062353	258.35539048491006	190.6441473466248	190.4732508638881	189.0459479540973
Ppp2r1b	7.935970854646763	8.369955532777825	7.855258379420309	5.60130365104004	5.650085858785452	5.461409965462785
Nsl1	1.0600005798219476	0.711308078556491	1.017461247840381	0.5248028567648064	0.7953296348814787	0.6707917978708263
Cenpq	1.0007270571966407	1.7345803262652097	1.499139650865217	0.4458992284657513	0.972989160752047	1.1116939318755659
Psmd8	91.22345667127793	94.13063046150059	86.18710693586323	68.68964632715287	63.585238330265	66.91497253669147
Psmb9	21.08841436368938	23.58292455500913	21.87516132991819	16.958461953316043	16.97866069062322	15.29541186395911
Nup133	5.854137064597192	6.332025568953652	6.41100004656482	4.424013484441193	4.7668268195440735	4.730972689427562
Tubb2a	52.89563599117507	50.50940212900907	41.3574682263003	36.80069009403132	38.32041385926944	33.5869305938653
Psmc6	36.34676219004507	33.87018123191189	38.045754384230975	26.668142857387103	25.98529080131754	29.70687141622505
Psmb10	19.127450698220663	20.75609761409436	18.468776671062162	14.522985966756082	16.29238780887907	13.90960475465365
Cdc16	24.857475658468246	24.34137801442713	26.335618837935172	18.47113950080017	19.684514042340023	20.03728453059317
Stag2	8.359664523535637	7.521750452639007	9.680814826247142	6.474236993579639	6.2566757934926525	7.029906348411625
Psmd10	11.417759787396937	10.10594963599909	12.472424322112259	8.437115019769323	9.249870737177364	9.080454888322706
Mad1l1	5.60935989937482	6.193903657385257	5.541090408718754	4.966002223043999	5.019540812533292	3.6751996204517785
Psmc3	138.3223079604702	145.37802076591848	134.58005642524108	108.13683384883	112.43324906975691	109.3664067202914
Clasp2	5.6021295082798535	5.008536605770597	5.865624221685817	4.3068421352462485	4.282848075239665	4.455079319884166
Tubb4a	1e-08	0.0338915873527416	1e-08	1e-08	1e-08	1e-08
Tuba3b	1e-08	1e-08	0.016144412828418102	1e-08	1e-08	1e-08
Psma6	79.50491631248433	74.77579027515682	80.48808802619382	61.767406112484444	65.01002931761006	59.70019611797286
Xpo1	26.71475668331078	26.95162229932712	28.96738407860952	21.86842853813684	21.921987591412076	22.530101980530898
Psmd3	52.57499424357464	55.44829284086258	50.306145096409786	44.06312442463773	45.489560499600785	38.51341509541822
Psme2	40.304102812081894	46.686316560088	42.89807053371671	36.4022733628112	35.48573650838833	33.86696354694304
Psmd14	39.7567984788289	41.032421836661726	38.74667385657772	31.149167430302146	29.67732605104177	36.54195310199728
Anapc2	48.84798065410327	53.38330505745795	46.54091741007875	40.19850068209382	41.788627903454305	39.658657026968804
Uba52	735.200981392038	822.1241918817526	721.6862510941656	625.5423064884333	661.8501580718869	588.9355328583767
Zw10	4.424304023012232	4.531061540147384	4.9566947877305445	3.56220899137638	4.136788592488082	3.928348170517205
B9d2	4.230904457135173	4.900874377110951	4.053181394078174	4.015243442642043	3.1567718585214504	3.98553128901924
Cenpl	1.892880939339724	1.512054507017538	2.0453879061323645	1.4528367804516649	1.5402654386251016	1.657075259067606
Psmd13	68.67153187738668	71.21205795995517	68.7948964062077	59.59230296418829	60.195557032534545	58.655795072541295
Psmd9	52.990485087607034	60.24770939845778	50.79171021606191	48.164982900265514	45.45715267675337	46.651146111616015
Nudc	87.24527450720596	86.99049845205109	87.80790724049803	76.5338494745314	72.2309492674684	75.82093005706616
Dynll1	101.90785442587587	109.57451492155263	106.47023087174433	93.25563762224708	89.8401095984251	90.10506038233683
Psmf1	27.10694884066165	25.173438582461092	24.41442560416763	22.82202182768185	22.33914245499374	20.77501617400908
Psmd6	52.17358166723689	51.68612751030013	53.418127763178454	46.17577230382905	43.36875963165845	46.15198552823482
Ppp2r5a	12.997481892088985	11.67322447265926	12.787411834265553	10.365980916890543	10.744160719113362	11.257294374611044
Anapc4	15.862471949789281	15.718424527672587	17.668778379934	13.734878757658027	14.250115504378353	14.672925887714637
Dync1li2	48.767305028071846	46.236393496264064	52.56351529242	41.35996269344591	40.74599482193327	46.1081392703404
Ska2	4.462367185529828	4.92857144881005	4.006264822907385	3.4276889620628483	4.276633011844593	3.941506843466916
Ube2e1	25.52651947935589	27.09291383722502	27.924793064730483	23.1205836423244	23.38178719785084	23.58613268672361
Ubc	153.4559036116401	114.67484802974596	130.04403504003866	121.81857284109205	116.87234083042169	108.482240280207
Psme3	41.17675870861019	41.95229900883179	43.57872166693553	36.264250396372255	37.593640276848404	36.80352900715506
Psmc2	89.19012003458919	83.344403684756	85.92068854577239	74.85358933282703	76.43961392380159	74.43620805681391
Ppp2r1a	106.93804625204957	112.42588843419584	103.04062741364869	97.40272612049104	96.45423553572935	88.34465525697485
Psma3	45.59505397623938	48.01657045085328	48.67477002933713	40.92621564695454	40.92159167917298	42.721288679602004
Psmb7	155.54056822694514	148.24019029638487	151.3346756383	126.40642948436155	135.0679321450557	137.89973647191138
Psma2	122.00397202244889	122.43129447559957	125.7813835251387	111.89493863184667	103.84552381021777	110.07512244188159
Itgb3bp	2.195055266054392	1.988815589021652	2.6624322649537215	1.6540381401988151	1.6344486455248488	2.6004974852090865
Anapc11	13.865875965250021	14.509526459919002	12.31868447631793	12.203874074632324	12.379913407791875	11.338874164644032
Psma1	71.11533425057743	73.9726882292159	73.86614359833612	64.21749273612753	65.14986288130991	64.1229016768907
Rad21	26.181174535131372	25.41295026313539	26.949624259130438	23.14039611158748	22.83287747954576	23.513298928400694
Taok1	12.753516529861734	11.682977745499954	14.295660454789841	10.944787842451081	10.852680742421834	12.863804297071994
Psmc5	86.82626653934504	87.74065385792002	89.14229791610191	81.30395968124336	77.92947064305967	77.54062450339305
Psmd4	76.28134352195946	77.47973005554066	77.21879488510687	68.53429039251834	72.21090517214449	66.81778795809018
Psmb8	41.29516388672146	44.11811636850545	42.61706101588948	41.511581211513295	38.729503512126506	35.43990141927219
Psma4	75.28921113337431	71.1132656874497	78.76527236352955	69.19333747602481	62.32616570938281	72.15530040259094
Psmb3	93.50597896677772	100.42875045422119	90.2652371249862	87.97867978903079	84.3533058353929	84.89804733578771
Psmc1	101.69795330021292	93.1121450827245	102.55015489877107	88.86732837590054	89.51852477094104	90.9368193641725
Psmb1	83.9361638895772	87.28144629382798	87.03594333098657	78.7888328247218	76.12153908736991	79.9593063244384
Psmd1	48.31636708303323	49.945768094016465	53.37368355631545	46.18245287785807	44.98599354859481	47.17488673117455
Hdac8	2.158987404503151	2.5337435172577525	2.2740940298903443	1.8928092227451052	2.2707063320981757	2.2304229425838957
Anapc10	6.757854796183895	6.326521891684669	6.325261261580237	5.688348750557935	6.013748363326188	6.191614508068234
Psmb2	96.17781886637955	97.86702191112352	93.51747261096236	93.37734215421257	89.59481342394699	82.20859942019261
Mis12	12.309927777033904	10.79058778933296	13.153608743609277	9.530921747429725	11.63181108680327	12.63022026986997
Psmb5	86.18093787118544	85.15280026261219	79.39332221978	80.59133199580019	81.03139338295976	72.86031526531877
Sec13	93.8393492153454	97.50704347861755	94.8234023619864	89.58277376615948	91.35922004215219	86.80733341893804
Psmd2	114.74578023717083	120.14412087456955	114.77059872682752	113.37642076186229	109.95619373137028	106.54673384458863
Ahctf1	7.854619690121262	7.463539642053014	7.928653359008338	7.617576645601221	6.474734716158914	7.982026235785165
Ubb	681.1635601195136	725.2742506757249	658.0120537394453	660.2172587608743	680.0600604145363	623.6212910225618
LOC100360846	3.7647378583573787	4.819930625176723	3.992418511404212	5.175607396096946	3.3642130626700166	3.429851863634672
Cenpk	2.537948167706424	3.0875200455408986	4.136694228249802	2.735349514887393	2.26189055191317	4.190210801443421
Smc1a	15.461726608566885	14.998135438239707	15.32788681154698	13.535254401206284	13.943906888318985	16.70999390293673
Ppp2ca	54.710468318585704	50.82520810818908	53.69773595937208	51.657596876362526	51.34798020376218	50.89706697366602
Pafah1b1	35.414546179323146	33.08710465156583	38.61588019331432	33.89511237001689	33.663644570472826	36.49690871549904
Psmb6	78.85799024416103	88.07186211581532	84.3139409622827	73.65877618354003	84.5255452108846	87.01456510539968
Pds5a	12.842654067880733	12.505388695088325	14.476494623528597	12.419750893491814	13.007114751110217	13.80445855022561
Dynll2	79.52982421233892	79.26045669175741	83.77086815235701	79.2116931744772	76.78512667992051	84.59816924315099
Psmd12	46.07488613634612	41.60204514627714	45.41961437347346	42.847626353621564	43.16792791181916	46.28698536196597
Psmc4	60.98986174996781	62.73628600408321	61.551907838910296	64.88921899723928	59.99005147216097	60.33196103527587
Cdc27	12.139019956025617	12.493954389283497	12.97146284303103	11.667435964207245	12.773536856312305	13.28499157400128
Anapc7	2.859924038899433	2.697260713567272	3.0882043280144216	2.9471978317830607	2.825580135168765	2.9083792970928948
Rps27a	393.3709722434199	253.77715937193662	426.5546558364713	377.575624570344	381.82801756671904	322.3118832732185
Cdc26	5.609941895567526	5.700249488090143	5.3826233208644245	5.605943215207104	5.3375816675373935	5.995819030704273
Tuba8	0.1782379110582143	0.12251600155365719	0.0696443649923075	0.027725960246233503	0.1898458655028453	0.17972493355973249
Ppp1cc	54.29540383265789	53.33429767653279	53.984843775241394	54.90887463354971	55.84038066153933	55.20076833211272
Anapc5	121.41261327833163	129.95105030942915	119.9412916963214	132.95532084224553	128.9233609922656	122.27907051783244
Ppp2cb	43.43996606480869	46.94470584458503	48.58109693277989	49.63599735567725	48.80403946205264	49.12318033229883
Nup98	15.128811201607	13.547122577312713	13.960238001684058	15.573981413996218	14.860176503630221	14.91229842803894
Dync1li1	13.636983461435612	14.554531821134608	13.717655960838337	15.221695195860905	14.277082519617338	15.932221163794285
Nde1	8.999716024625345	9.075705724192606	9.505668159216198	10.123870204029775	10.362755622006821	9.610581371253414
Zwint	39.50296674788768	42.21045768200805	42.538671942384376	42.946217164276106	44.67574619008099	48.26626426589426
Mapre1	55.24624721128172	51.79591099635824	57.08185864641279	56.04696819465747	58.40791506339156	65.43662446316438
Rps27	531.4138037264777	600.8962502080001	631.6057518769775	646.9052661694365	683.4478472525392	603.0892904439693
Dync1h1	51.434612218474726	48.66976775606154	46.15054425017822	53.143725799353966	53.34528217967653	53.990724817867324
Ndel1	7.304037333064804	6.9636645393764125	7.023745691134738	7.61945513134231	8.00245792314817	8.032190032981264
Stag1	2.2940100746073737	2.158153093512894	2.229827225802149	2.489528979898565	2.4141873133311855	2.5737349959299416
Tubb6	121.27142982082215	132.26251613647366	119.09433690214144	142.19881416835267	145.08715104755547	135.45508166177677
Tuba1a	158.8651853617264	179.22144867021422	156.60400222174337	196.74258850964733	189.39282684599672	180.71458624404912
Ube2d1	2.390910160669754	2.215951041051576	2.569706182409775	2.7961846215446604	2.8721700537801005	2.9799437913299616
Dsn1	1.837910597255585	1.4722468534959914	1.653098528355478	1.953027733899672	1.8602310576804015	2.215236596659544
Tubb2b	0.0702201156500447	0.3764859840447793	0.2282814829712268	0.3124020721753845	0.2639134169062389	0.5806087636496934
Ube2s	61.29361916635946	58.674447712713395	58.869168467042	76.0163372391605	73.739709207818	69.51172044540539
Nup43	4.725553784630555	4.942329141494407	5.279150937721587	6.4954536821390985	6.520018609925844	5.375438544041061
Anapc15	10.627807584701964	10.33449160601582	10.277551751963525	14.500215829187393	11.306063216527937	12.766475814119609
Psma8	0.0128686076223886	1e-08	1e-08	1e-08	0.025455273389240203	0.0648798057750121
Ppp2r5b	5.384117789095869	5.330976237397608	5.084523510079414	6.23347545384082	7.546398319790081	7.123736380271432
Tubb3	10.435607865233457	12.854859352427178	11.679646716453561	16.526734401257382	16.551263497438367	13.854173258238324
Dync1i1	1.0239659274154096	1.1270038387362735	1.1531639089778924	2.8331543470032834	2.323827474350618	2.545254190615159
