# Supplementary material for: Peptide-based Self-adaptive Implant Coating Sequentially Regulates Bone Regeneration to Enhance Interfacial Osseointegration
Source: Research Square preprint supplement (doi:10.21203/rs.3.rs-5132912/v1), 2024-10-01
Supplement: Supplementary file 381 [file 1_Resolution of Sister Chromatid Cohesion(R-RNO-2500257).heatmap-data.xls]

id	S1	S2	S3	C1	C2	C3
Clip1	14.929776150279931	15.036566615557177	15.255687515000101	5.7206526081480655	5.750907895329468	6.094231815302344
Sgo2	2.199520901654152	1.4808653470148054	1.8630957520912732	0.7100255792530247	0.780628087270033	0.7783031287284788
Nuf2	7.508051723087072	5.913583434743948	5.713942828420977	2.669092586743365	2.7945173286305387	2.608276841829059
Spdl1	3.8093103928158176	4.1575607557987375	3.9179662245516793	1.089546842849893	1.8136748242561247	1.7346863181146555
Ska1	2.1255695605125626	2.9638986110938546	2.4610890088271735	0.9955812353268825	0.6956091877653761	1.3080452127405744
Cenpi	1.9291406714277248	1.9875462208193608	2.335713111169468	0.9819697732618664	0.78411303404356	1.105852957629448
Ccnb1	6.127544165985409	6.593853348265486	6.1074971496636286	2.7430520308091944	2.7189612323887493	3.2315807696778416
Cenpu	1.8542297631227975	1.5487896271393962	1.6744424860760836	0.8332604513342873	0.7131903602715653	0.8012997624182977
Cenpm	8.366304277568934	8.437283087092917	7.323459897477765	4.415850492494844	2.2117795622650935	2.838563163818753
Cenpt	2.8422815718145333	2.7109204389441555	2.523745552336556	1.221959682997753	1.5273158133544122	0.9478092004523513
Cdc20	16.60411794333861	16.631549700186856	16.25825091022395	7.5171005888927915	8.026299970205978	8.277111272570885
Cenpa	0.6747355560477758	0.9304534726788303	0.9139691579855924	0.450611322229661	0.3872244916009663	0.4829750244588414
Aurkb	5.8815742707038225	6.626176158747178	6.2287651434114615	3.5659676370519526	3.123227835191288	3.1841647991633817
Ndc80	1.9752373866805144	2.005175290017522	2.2618956656860925	1.006064982664817	1.0620569322687778	1.2417185894260694
Kif18a	0.7462523464179286	0.5405171158231228	0.739489564509641	0.3525335693243324	0.24804251453168188	0.419414117329864
Plk1	8.508179246048215	9.04787147459503	7.48090254815866	4.858141517862324	4.5278564362995075	4.082723136744948
Cdca8	11.910258319067484	12.786093176327137	11.10238164738909	6.201157049792885	6.276925294779472	6.930285118313554
Birc5	3.892487234021695	3.99314106925691	4.716440488945464	2.4059038215360826	2.4685071467523163	1.9820405651453183
Tubb4b	197.2372854152425	216.9522282971692	191.96172547609814	113.40967416120797	116.00986648995624	109.95135181482904
Mad2l1	3.0640968639936017	3.187415522584354	3.1933271699179318	1.687659413732597	1.596602329088439	2.076153474800388
Ercc6l	0.6274728300676701	0.5701043541410307	0.8238892473412486	0.18554553479157548	0.2927355389762624	0.4476706008475837
Bub1b	2.5936890606831686	2.500092933437683	2.6349787646519056	1.3604286159717114	1.5017559870393378	1.5746453866006593
Cenpe	1.8181163326766647	1.899050492665623	2.500968097216545	0.9530893727448336	1.3848555400191132	1.3626596114462222
Kntc1	2.105546315453509	1.871877614572824	2.0034667076714667	1.3495692342177366	1.1055964272158727	1.1238029212596234
Cdk1	15.272179921277324	17.267849429080112	15.51530227525721	9.598524579023922	9.299448489796799	10.028917301520467
Sgo1	0.8864263212157493	0.9364354236618109	1.0446236191883014	0.5807876712900373	0.3857551245539247	0.6793044904715256
Tubb1	0.0078301090824057	1e-08	0.007954758748129299	1e-08	1e-08	1e-08
Cenph	1.8894912956913408	1.385891824672067	1.6774626561475725	0.8950040487896317	0.9764866055786181	1.2530056417037567
Cdca5	1.5897578156941832	1.2824720293251934	1.1336518470865338	0.6723364042134184	1.0734266107651196	0.8015105148099626
Bub1	3.1825564112359	2.836302300771473	3.579821702112984	2.074917706593962	2.3569931723379063	1.8946574783613863
Spc25	2.908607516279652	2.256822362349511	2.714140015985928	1.6120659743167205	1.8112844477057184	1.7923117476973323
Tuba4a	17.331578744121035	19.700186274587402	16.52156107619932	12.689595261702452	11.468719645829385	11.519262613671804
Cenpn	2.6132840048973693	2.9560571402413154	2.6738491154177106	1.8590648635323852	1.7354128424016502	1.9104376385283823
Nup85	9.01484025284536	9.879637085463495	8.555522052498869	6.195908090098006	6.286407321413134	6.029349782957658
Tuba1c	127.3012615105606	139.6486264045115	118.80367539151443	92.80393604906591	90.12290166513995	80.8605004818448
Cenpp	1.293891792797546	1.7128930876212587	0.8982345899526994	0.9157896617123417	0.7038449977024889	0.717577641959697
Tuba1b	280.13380083499334	290.42887208062353	258.35539048491006	190.6441473466248	190.4732508638881	189.0459479540973
Ppp2r1b	7.935970854646763	8.369955532777825	7.855258379420309	5.60130365104004	5.650085858785452	5.461409965462785
Nsl1	1.0600005798219476	0.711308078556491	1.017461247840381	0.5248028567648064	0.7953296348814787	0.6707917978708263
Cenpq	1.0007270571966407	1.7345803262652097	1.499139650865217	0.4458992284657513	0.972989160752047	1.1116939318755659
Nup133	5.854137064597192	6.332025568953652	6.41100004656482	4.424013484441193	4.7668268195440735	4.730972689427562
Tubb2a	52.89563599117507	50.50940212900907	41.3574682263003	36.80069009403132	38.32041385926944	33.5869305938653
Stag2	8.359664523535637	7.521750452639007	9.680814826247142	6.474236993579639	6.2566757934926525	7.029906348411625
Mad1l1	5.60935989937482	6.193903657385257	5.541090408718754	4.966002223043999	5.019540812533292	3.6751996204517785
Clasp2	5.6021295082798535	5.008536605770597	5.865624221685817	4.3068421352462485	4.282848075239665	4.455079319884166
Tubb4a	1e-08	0.0338915873527416	1e-08	1e-08	1e-08	1e-08
Tuba3b	1e-08	1e-08	0.016144412828418102	1e-08	1e-08	1e-08
Xpo1	26.71475668331078	26.95162229932712	28.96738407860952	21.86842853813684	21.921987591412076	22.530101980530898
Zw10	4.424304023012232	4.531061540147384	4.9566947877305445	3.56220899137638	4.136788592488082	3.928348170517205
B9d2	4.230904457135173	4.900874377110951	4.053181394078174	4.015243442642043	3.1567718585214504	3.98553128901924
Cenpl	1.892880939339724	1.512054507017538	2.0453879061323645	1.4528367804516649	1.5402654386251016	1.657075259067606
Nudc	87.24527450720596	86.99049845205109	87.80790724049803	76.5338494745314	72.2309492674684	75.82093005706616
Dynll1	101.90785442587587	109.57451492155263	106.47023087174433	93.25563762224708	89.8401095984251	90.10506038233683
Ppp2r5a	12.997481892088985	11.67322447265926	12.787411834265553	10.365980916890543	10.744160719113362	11.257294374611044
Dync1li2	48.767305028071846	46.236393496264064	52.56351529242	41.35996269344591	40.74599482193327	46.1081392703404
Ska2	4.462367185529828	4.92857144881005	4.006264822907385	3.4276889620628483	4.276633011844593	3.941506843466916
Ppp2r1a	106.93804625204957	112.42588843419584	103.04062741364869	97.40272612049104	96.45423553572935	88.34465525697485
Itgb3bp	2.195055266054392	1.988815589021652	2.6624322649537215	1.6540381401988151	1.6344486455248488	2.6004974852090865
Rad21	26.181174535131372	25.41295026313539	26.949624259130438	23.14039611158748	22.83287747954576	23.513298928400694
Taok1	12.753516529861734	11.682977745499954	14.295660454789841	10.944787842451081	10.852680742421834	12.863804297071994
Hdac8	2.158987404503151	2.5337435172577525	2.2740940298903443	1.8928092227451052	2.2707063320981757	2.2304229425838957
Mis12	12.309927777033904	10.79058778933296	13.153608743609277	9.530921747429725	11.63181108680327	12.63022026986997
Sec13	93.8393492153454	97.50704347861755	94.8234023619864	89.58277376615948	91.35922004215219	86.80733341893804
Ahctf1	7.854619690121262	7.463539642053014	7.928653359008338	7.617576645601221	6.474734716158914	7.982026235785165
Cenpk	2.537948167706424	3.0875200455408986	4.136694228249802	2.735349514887393	2.26189055191317	4.190210801443421
Smc1a	15.461726608566885	14.998135438239707	15.32788681154698	13.535254401206284	13.943906888318985	16.70999390293673
Ppp2ca	54.710468318585704	50.82520810818908	53.69773595937208	51.657596876362526	51.34798020376218	50.89706697366602
Pafah1b1	35.414546179323146	33.08710465156583	38.61588019331432	33.89511237001689	33.663644570472826	36.49690871549904
Pds5a	12.842654067880733	12.505388695088325	14.476494623528597	12.419750893491814	13.007114751110217	13.80445855022561
Dynll2	79.52982421233892	79.26045669175741	83.77086815235701	79.2116931744772	76.78512667992051	84.59816924315099
Tuba8	0.1782379110582143	0.12251600155365719	0.0696443649923075	0.027725960246233503	0.1898458655028453	0.17972493355973249
Ppp1cc	54.29540383265789	53.33429767653279	53.984843775241394	54.90887463354971	55.84038066153933	55.20076833211272
Ppp2cb	43.43996606480869	46.94470584458503	48.58109693277989	49.63599735567725	48.80403946205264	49.12318033229883
Nup98	15.128811201607	13.547122577312713	13.960238001684058	15.573981413996218	14.860176503630221	14.91229842803894
Dync1li1	13.636983461435612	14.554531821134608	13.717655960838337	15.221695195860905	14.277082519617338	15.932221163794285
Nde1	8.999716024625345	9.075705724192606	9.505668159216198	10.123870204029775	10.362755622006821	9.610581371253414
Zwint	39.50296674788768	42.21045768200805	42.538671942384376	42.946217164276106	44.67574619008099	48.26626426589426
Mapre1	55.24624721128172	51.79591099635824	57.08185864641279	56.04696819465747	58.40791506339156	65.43662446316438
Rps27	531.4138037264777	600.8962502080001	631.6057518769775	646.9052661694365	683.4478472525392	603.0892904439693
Dync1h1	51.434612218474726	48.66976775606154	46.15054425017822	53.143725799353966	53.34528217967653	53.990724817867324
Ndel1	7.304037333064804	6.9636645393764125	7.023745691134738	7.61945513134231	8.00245792314817	8.032190032981264
Stag1	2.2940100746073737	2.158153093512894	2.229827225802149	2.489528979898565	2.4141873133311855	2.5737349959299416
Tubb6	121.27142982082215	132.26251613647366	119.09433690214144	142.19881416835267	145.08715104755547	135.45508166177677
Tuba1a	158.8651853617264	179.22144867021422	156.60400222174337	196.74258850964733	189.39282684599672	180.71458624404912
Dsn1	1.837910597255585	1.4722468534959914	1.653098528355478	1.953027733899672	1.8602310576804015	2.215236596659544
Tubb2b	0.0702201156500447	0.3764859840447793	0.2282814829712268	0.3124020721753845	0.2639134169062389	0.5806087636496934
Nup43	4.725553784630555	4.942329141494407	5.279150937721587	6.4954536821390985	6.520018609925844	5.375438544041061
Ppp2r5b	5.384117789095869	5.330976237397608	5.084523510079414	6.23347545384082	7.546398319790081	7.123736380271432
Tubb3	10.435607865233457	12.854859352427178	11.679646716453561	16.526734401257382	16.551263497438367	13.854173258238324
Dync1i1	1.0239659274154096	1.1270038387362735	1.1531639089778924	2.8331543470032834	2.323827474350618	2.545254190615159
