# Supplementary material for: Peptide-based Self-adaptive Implant Coating Sequentially Regulates Bone Regeneration to Enhance Interfacial Osseointegration
Source: Research Square preprint supplement (doi:10.21203/rs.3.rs-5132912/v1), 2024-10-01
Supplement: Supplementary file 389 [file 3_Amplification of signal from unattached kinetochores vi...(R-RNO-141444).heatmap-data.xls]

id	S1	S2	S3	C1	C2	C3
Clip1	14.929776150279931	15.036566615557177	15.255687515000101	5.7206526081480655	5.750907895329468	6.094231815302344
Sgo2	2.199520901654152	1.4808653470148054	1.8630957520912732	0.7100255792530247	0.780628087270033	0.7783031287284788
Nuf2	7.508051723087072	5.913583434743948	5.713942828420977	2.669092586743365	2.7945173286305387	2.608276841829059
Spdl1	3.8093103928158176	4.1575607557987375	3.9179662245516793	1.089546842849893	1.8136748242561247	1.7346863181146555
Ska1	2.1255695605125626	2.9638986110938546	2.4610890088271735	0.9955812353268825	0.6956091877653761	1.3080452127405744
Cenpi	1.9291406714277248	1.9875462208193608	2.335713111169468	0.9819697732618664	0.78411303404356	1.105852957629448
Cenpu	1.8542297631227975	1.5487896271393962	1.6744424860760836	0.8332604513342873	0.7131903602715653	0.8012997624182977
Cenpm	8.366304277568934	8.437283087092917	7.323459897477765	4.415850492494844	2.2117795622650935	2.838563163818753
Cenpt	2.8422815718145333	2.7109204389441555	2.523745552336556	1.221959682997753	1.5273158133544122	0.9478092004523513
Cdc20	16.60411794333861	16.631549700186856	16.25825091022395	7.5171005888927915	8.026299970205978	8.277111272570885
Cenpa	0.6747355560477758	0.9304534726788303	0.9139691579855924	0.450611322229661	0.3872244916009663	0.4829750244588414
Aurkb	5.8815742707038225	6.626176158747178	6.2287651434114615	3.5659676370519526	3.123227835191288	3.1841647991633817
Ndc80	1.9752373866805144	2.005175290017522	2.2618956656860925	1.006064982664817	1.0620569322687778	1.2417185894260694
Kif18a	0.7462523464179286	0.5405171158231228	0.739489564509641	0.3525335693243324	0.24804251453168188	0.419414117329864
Plk1	8.508179246048215	9.04787147459503	7.48090254815866	4.858141517862324	4.5278564362995075	4.082723136744948
Cdca8	11.910258319067484	12.786093176327137	11.10238164738909	6.201157049792885	6.276925294779472	6.930285118313554
Birc5	3.892487234021695	3.99314106925691	4.716440488945464	2.4059038215360826	2.4685071467523163	1.9820405651453183
Mad2l1	3.0640968639936017	3.187415522584354	3.1933271699179318	1.687659413732597	1.596602329088439	2.076153474800388
Ercc6l	0.6274728300676701	0.5701043541410307	0.8238892473412486	0.18554553479157548	0.2927355389762624	0.4476706008475837
Bub1b	2.5936890606831686	2.500092933437683	2.6349787646519056	1.3604286159717114	1.5017559870393378	1.5746453866006593
Cenpe	1.8181163326766647	1.899050492665623	2.500968097216545	0.9530893727448336	1.3848555400191132	1.3626596114462222
Kntc1	2.105546315453509	1.871877614572824	2.0034667076714667	1.3495692342177366	1.1055964272158727	1.1238029212596234
Sgo1	0.8864263212157493	0.9364354236618109	1.0446236191883014	0.5807876712900373	0.3857551245539247	0.6793044904715256
Cenph	1.8894912956913408	1.385891824672067	1.6774626561475725	0.8950040487896317	0.9764866055786181	1.2530056417037567
Bub1	3.1825564112359	2.836302300771473	3.579821702112984	2.074917706593962	2.3569931723379063	1.8946574783613863
Spc25	2.908607516279652	2.256822362349511	2.714140015985928	1.6120659743167205	1.8112844477057184	1.7923117476973323
Cenpn	2.6132840048973693	2.9560571402413154	2.6738491154177106	1.8590648635323852	1.7354128424016502	1.9104376385283823
Nup85	9.01484025284536	9.879637085463495	8.555522052498869	6.195908090098006	6.286407321413134	6.029349782957658
Cenpp	1.293891792797546	1.7128930876212587	0.8982345899526994	0.9157896617123417	0.7038449977024889	0.717577641959697
Ppp2r1b	7.935970854646763	8.369955532777825	7.855258379420309	5.60130365104004	5.650085858785452	5.461409965462785
Nsl1	1.0600005798219476	0.711308078556491	1.017461247840381	0.5248028567648064	0.7953296348814787	0.6707917978708263
Cenpq	1.0007270571966407	1.7345803262652097	1.499139650865217	0.4458992284657513	0.972989160752047	1.1116939318755659
Nup133	5.854137064597192	6.332025568953652	6.41100004656482	4.424013484441193	4.7668268195440735	4.730972689427562
Mad1l1	5.60935989937482	6.193903657385257	5.541090408718754	4.966002223043999	5.019540812533292	3.6751996204517785
Clasp2	5.6021295082798535	5.008536605770597	5.865624221685817	4.3068421352462485	4.282848075239665	4.455079319884166
Xpo1	26.71475668331078	26.95162229932712	28.96738407860952	21.86842853813684	21.921987591412076	22.530101980530898
Zw10	4.424304023012232	4.531061540147384	4.9566947877305445	3.56220899137638	4.136788592488082	3.928348170517205
B9d2	4.230904457135173	4.900874377110951	4.053181394078174	4.015243442642043	3.1567718585214504	3.98553128901924
Cenpl	1.892880939339724	1.512054507017538	2.0453879061323645	1.4528367804516649	1.5402654386251016	1.657075259067606
Nudc	87.24527450720596	86.99049845205109	87.80790724049803	76.5338494745314	72.2309492674684	75.82093005706616
Dynll1	101.90785442587587	109.57451492155263	106.47023087174433	93.25563762224708	89.8401095984251	90.10506038233683
Ppp2r5a	12.997481892088985	11.67322447265926	12.787411834265553	10.365980916890543	10.744160719113362	11.257294374611044
Dync1li2	48.767305028071846	46.236393496264064	52.56351529242	41.35996269344591	40.74599482193327	46.1081392703404
Ska2	4.462367185529828	4.92857144881005	4.006264822907385	3.4276889620628483	4.276633011844593	3.941506843466916
Ppp2r1a	106.93804625204957	112.42588843419584	103.04062741364869	97.40272612049104	96.45423553572935	88.34465525697485
Itgb3bp	2.195055266054392	1.988815589021652	2.6624322649537215	1.6540381401988151	1.6344486455248488	2.6004974852090865
Taok1	12.753516529861734	11.682977745499954	14.295660454789841	10.944787842451081	10.852680742421834	12.863804297071994
Mis12	12.309927777033904	10.79058778933296	13.153608743609277	9.530921747429725	11.63181108680327	12.63022026986997
Sec13	93.8393492153454	97.50704347861755	94.8234023619864	89.58277376615948	91.35922004215219	86.80733341893804
Ahctf1	7.854619690121262	7.463539642053014	7.928653359008338	7.617576645601221	6.474734716158914	7.982026235785165
Cenpk	2.537948167706424	3.0875200455408986	4.136694228249802	2.735349514887393	2.26189055191317	4.190210801443421
Ppp2ca	54.710468318585704	50.82520810818908	53.69773595937208	51.657596876362526	51.34798020376218	50.89706697366602
Pafah1b1	35.414546179323146	33.08710465156583	38.61588019331432	33.89511237001689	33.663644570472826	36.49690871549904
Dynll2	79.52982421233892	79.26045669175741	83.77086815235701	79.2116931744772	76.78512667992051	84.59816924315099
Ppp1cc	54.29540383265789	53.33429767653279	53.984843775241394	54.90887463354971	55.84038066153933	55.20076833211272
Ppp2cb	43.43996606480869	46.94470584458503	48.58109693277989	49.63599735567725	48.80403946205264	49.12318033229883
Nup98	15.128811201607	13.547122577312713	13.960238001684058	15.573981413996218	14.860176503630221	14.91229842803894
Dync1li1	13.636983461435612	14.554531821134608	13.717655960838337	15.221695195860905	14.277082519617338	15.932221163794285
Nde1	8.999716024625345	9.075705724192606	9.505668159216198	10.123870204029775	10.362755622006821	9.610581371253414
Zwint	39.50296674788768	42.21045768200805	42.538671942384376	42.946217164276106	44.67574619008099	48.26626426589426
Mapre1	55.24624721128172	51.79591099635824	57.08185864641279	56.04696819465747	58.40791506339156	65.43662446316438
Rps27	531.4138037264777	600.8962502080001	631.6057518769775	646.9052661694365	683.4478472525392	603.0892904439693
Dync1h1	51.434612218474726	48.66976775606154	46.15054425017822	53.143725799353966	53.34528217967653	53.990724817867324
Ndel1	7.304037333064804	6.9636645393764125	7.023745691134738	7.61945513134231	8.00245792314817	8.032190032981264
Dsn1	1.837910597255585	1.4722468534959914	1.653098528355478	1.953027733899672	1.8602310576804015	2.215236596659544
Nup43	4.725553784630555	4.942329141494407	5.279150937721587	6.4954536821390985	6.520018609925844	5.375438544041061
Ppp2r5b	5.384117789095869	5.330976237397608	5.084523510079414	6.23347545384082	7.546398319790081	7.123736380271432
Dync1i1	1.0239659274154096	1.1270038387362735	1.1531639089778924	2.8331543470032834	2.323827474350618	2.545254190615159
