# Supplementary material for: Peptide-based Self-adaptive Implant Coating Sequentially Regulates Bone Regeneration to Enhance Interfacial Osseointegration
Source: Research Square preprint supplement (doi:10.21203/rs.3.rs-5132912/v1), 2024-10-01
Supplement: Supplementary file 405 [file 777_Collagen chain trimerization(R-RNO-8948216).heatmap-data.xls]

id	S1	S2	S3	C1	C2	C3
Col11a1	286.6589469035739	272.4645788976701	290.4201070496098	137.30029263542065	136.51216046354577	147.40066171407025
Col5a3	10.855264701134438	10.278281073127564	11.147943231127456	8.35824635993656	7.376094417386638	8.1428850744571
Col10a1	0.0076877436445438	0.076329417436207	0.0468607117162526	1e-08	0.0304140909325986	1e-08
Col17a1	0.10599363901765989	0.1428232529469812	0.0999894849117375	0.10717155677113249	0.07113638154978709	0.09160965928615619
Col8a1	205.20255149085168	192.13079881767	204.88908264996545	168.37986747405037	164.22181312922814	180.115879950907
Col5a1	233.7657514937928	228.37470175507042	218.87007335935377	194.7483148572744	196.07963204033481	195.93188714483017
Col16a1	25.00379336846036	23.446384371688694	24.42947589929345	29.032804069216876	30.062069642804648	29.46143833356745
Col2a1	1e-08	1e-08	1e-08	1e-08	0.0463464226619849	0.0047250772561259
Col11a2	0.046539423982694	0.0436406277479777	0.0788004911563977	0.0914989760752121	0.1764468455480419	0.0990695736730475
Col13a1	1e-08	1e-08	1e-08	0.0041906905597098	0.0040992297301069	1e-08
Col15a1	67.86114822524716	66.03744588170447	65.61551020375484	110.5553178883345	113.42783016306683	111.59494788652661
Col8a2	57.309238783004275	57.16998775109829	56.160369118510616	98.28010194845015	99.5150529640943	99.10917194887934
Col3a1	981.1640535291716	957.6566910066844	955.5129303693294	1845.9344289871199	1803.33433938434	1837.657893184892
Col27a1	0.7122821480440159	0.6867067792004662	0.8468465221779615	1.5082403310622223	1.2379442633274094	1.5717669818259938
Col1a2	1863.5262637035455	1878.7347332412114	1837.64184058136	3599.6595895560467	3596.011754033118	3538.2760564384503
Col18a1	24.0470834520046	24.138630119426498	22.724367458340826	55.50455045951541	56.528885222016896	51.57584833549061
Col1a1	2526.782231321241	2495.8319610587514	2367.8312553481283	5956.101136185713	6023.940456224581	5759.444283936097
Col23a1	0.640609376572059	0.6803250640872347	0.8814733466214739	3.2427421688629305	2.895274693847417	2.7228183981688647
