# Supplementary material for: Peptide-based Self-adaptive Implant Coating Sequentially Regulates Bone Regeneration to Enhance Interfacial Osseointegration
Source: Research Square preprint supplement (doi:10.21203/rs.3.rs-5132912/v1), 2024-10-01
Supplement: Supplementary file 409 [file 778_Extracellular matrix organization(R-RNO-1474244).heatmap-data.xls]

id	S1	S2	S3	C1	C2	C3
Eln	10.638709830456738	10.962348711629213	9.950393580556932	0.7669237354391656	0.9197929812680334	0.7382200372472689
Spp1	1161.7405365134805	1169.2708993871843	1165.5576979850223	202.34258870094072	202.2785386289191	209.57615809568364
Loxl3	209.5510433776864	219.45073517086732	210.4562310437656	53.61925641936982	55.211167299987345	54.35992828378928
Adam8	2.306205787621232	2.1382827606714008	2.098492301313196	0.6942103917600619	0.7312947143570571	0.8284032512214684
Bmp2	3.306217353224456	3.238412295084212	4.01070229639592	1.1533661480563413	1.1987062784462683	1.2939819963415289
Tll2	0.028416715220756103	0.0176338665034141	0.021651819373846103	0.0035915728619295	0.0070263653309633	0.0035817328990705
Mfap2	0.2686345924576429	0.2095656764455992	0.2339237722140326	1e-08	0.037955994308105305	0.0773930889147632
Itgb7	0.9178761568323343	1.2966136440408322	0.841513651283352	0.369721580703911	0.08856796077756439	0.1504933276502014
Capn12	0.6424623273884252	0.3535256865466433	0.4718240089737109	0.0704387881427276	0.1224915030008551	0.14829668605717058
Col11a1	286.6589469035739	272.4645788976701	290.4201070496098	137.30029263542065	136.51216046354577	147.40066171407025
Jam2	0.14241745929388888	0.1728251597397212	0.1661194055546076	0.053333398366279004	0.0365185879074865	0.09041836650890529
Ctss	23.430712112980515	22.706695537266604	23.60255442240068	11.46182089630436	11.831819299632905	11.397142113808403
Itgb4	0.580106911946333	0.4893882363804213	0.3466716544020612	0.1610147478030666	0.21750086739789548	0.2446835888779961
Serpine1	767.8254861942345	792.2051369535353	745.0672416179519	407.5959648544919	408.109001266656	399.32975221082927
Itgb8	0.4515817444855487	0.4568228615577532	0.4962801535608733	0.2785548534268198	0.176968591748874	0.2749278527659384
Cd44	82.36805033461542	83.31583341033452	85.55039819068719	51.66081511524506	52.070994308034656	49.95606310805232
Lox	605.4504554177099	578.8877107540343	602.2689845638454	369.23759116508865	371.846742257589	385.7958007818378
Itgb3	7.497756414583288	7.451197686924488	7.201764393749754	4.617311963992778	4.811245929609863	4.835244163608864
Ltbp1	116.07342901348363	114.37094548376203	114.03427443431578	76.73374286036501	75.69411759881713	78.63064790521443
Vcan	166.28550469835463	153.58321041632627	166.4042159267647	110.39776765583255	110.45180386668396	120.31122999444999
P4hb	1011.7617225645122	1054.302523454946	1006.5267764279677	738.3551440482996	737.1606760061175	702.7053023221669
Tnr	0.0418175288050326	0.0113235024092566	0.0270347890800997	0.0096096102398742	0.0150398059817618	0.0057499734370726
Sdc4	93.40852946025696	89.84072537723092	92.60317809287899	67.82903448249263	64.70079034682023	65.38714691819766
Adam15	29.74389239288354	31.102969808343182	28.5374432383943	21.217145724256802	22.805525265586006	20.778096387930802
Col5a3	10.855264701134438	10.278281073127564	11.147943231127456	8.35824635993656	7.376094417386638	8.1428850744571
Ltbp4	0.8122035533213579	0.7652711148661937	0.6104302219495518	0.45670424977964097	0.5491993223250846	0.6142347723810039
Mmp16	4.214634796651103	3.8179454712234278	4.01055265804312	2.9749136295249023	2.7829477070654	3.2399643698213545
Acan	0.0183837208891266	1e-08	0.018676376626042702	0.0061960136329251	1e-08	1e-08
Adam10	30.065395919825	27.16786449158485	30.25802320167428	21.544059580975624	20.981055307405672	23.30173721956018
Col10a1	0.0076877436445438	0.076329417436207	0.0468607117162526	1e-08	0.0304140909325986	1e-08
Col17a1	0.10599363901765989	0.1428232529469812	0.0999894849117375	0.10717155677113249	0.07113638154978709	0.09160965928615619
Mmp15	0.3597005700474896	0.2586163574580342	0.2709198343103065	0.100330478465679	0.17788016380432908	0.3064202502868042
Loxl1	121.01881177635131	130.79235426918422	115.98258762904885	98.2258088758194	100.34002006067776	89.57948866607269
Capn2	87.85812492159069	84.95660770712946	92.71473650365343	68.73003012939208	67.78998222826614	72.44286294340004
Fgb	0.0134535438779517	1e-08	1e-08	1e-08	1e-08	1e-08
Mmp20	0.0072101864997549	1e-08	1e-08	1e-08	1e-08	1e-08
Mmp19	134.7954984853683	140.42135420912822	135.16491052538538	113.19058502228523	106.58381377292936	106.03675236972612
Matn1	0.051455757102923	1e-08	0.0348499342511307	0.0260137999720637	1e-08	1e-08
Ppib	501.05712246057834	547.3944326493125	524.1326615299156	441.02952748825874	444.8741657162645	420.561055952796
Jam3	42.386781050001204	42.92162378090792	45.56676205257858	36.24278909033312	35.76288673806708	36.93004860956971
Cd47	27.022809094701383	26.314008964449766	28.147531879065287	22.33947257726304	22.451155033144882	23.149254721602116
Pxdn	33.86916431979022	35.23028009004591	32.24640424449961	29.102543475499402	27.685217124172222	28.33049614331077
Capn10	4.043783212351056	4.575032208179825	4.391240508370311	3.800106495305776	3.64322978508919	3.4950172519788394
Col8a1	205.20255149085168	192.13079881767	204.88908264996545	168.37986747405037	164.22181312922814	180.115879950907
Capn8	1e-08	0.027677732498648102	1e-08	1e-08	0.0055142182218274	1e-08
Col5a1	233.7657514937928	228.37470175507042	218.87007335935377	194.7483148572744	196.07963204033481	195.93188714483017
Mmp24	0.044654832489759703	0.06650484024144769	0.10774353759842459	0.0846582774597689	0.0441656720803413	0.022513696794157902
P3h3	55.30736957689336	56.228886775630244	55.51066798451946	51.236431788906906	46.931862296274794	47.17543885963992
Gdf5	1.7930055050036373	1.5707878155914328	1.4679541077126923	1.3117091586091694	1.303944459782906	1.6590732019162118
Colgalt1	77.49449842488508	80.0632404044572	73.42691952254988	70.393790536153	70.26429956381114	63.932847926066906
Itgb6	0.0380755390455398	0.0850593536836848	0.0531872989161353	0.052935676012834	0.047073059885630104	0.047991497126039104
Itgae	0.8631714046766635	0.8570193100678986	0.864295039993442	0.7220708661045383	0.8045812698141176	0.7889709962302026
Cast	29.808782056360023	28.88896923731613	30.87340130464455	25.574766146778202	26.03090944752123	29.073708294099113
Ctrb1	0.1131846162389822	0.11237791387357439	0.2069755758977889	1e-08	0.1343337135455123	0.1826062420856938
Matn3	0.0195364948392698	0.0096986310768777	0.059542485778076804	0.0098768078703063	0.0096612485800746	0.039398961889776304
Agrn	2.8370333789443887	2.6710724033565563	2.9053368037374536	2.4079540409323332	2.6908139787856524	2.5978547141917643
Tgfb2	34.06262770245064	30.413957780311883	33.81103051467641	29.556495985047636	29.655117690102568	31.160400455547048
Ctsl	907.3431676286376	911.3895803734044	922.6108790247878	848.5319481722673	829.5523642786392	852.5543503857023
Itgal	0.11632891392011879	0.1522497347030374	0.1181807881856959	0.1657396480451768	0.0732165782120174	0.1066358512023424
Capn15	2.277274287528324	2.5127699406131248	2.4607095156737127	2.275115678202381	2.346362031928283	2.227796041445464
Tmprss6	0.029896751951003903	1e-08	0.0075931792595779	0.0151145037106203	0.0073923213377844	0.007536551933461
Capn1	14.694184190691605	14.574240913207724	13.771008467477651	13.669709830014485	14.34631411340958	12.983348408352125
Itga1	11.018024138426838	10.186151117611569	11.684746043673707	9.916886059897617	10.046972485975425	11.586768243702165
Capns1	273.0830595127955	293.5690073622473	263.6620506211736	271.13805627317083	277.0917423177709	249.0372504899436
Fgg	0.0106562744577835	1e-08	0.1623885803038458	0.1077468958578877	0.010539542996445	0.0107451786972117
P3h1	69.99614048097145	75.53152933826978	69.33977914806428	72.7463003478107	69.66703665423636	64.95264327500512
Furin	35.022464339769485	36.26288423523593	32.56353924609043	33.916017439035635	34.96866210833662	31.658982154811092
Plod3	84.81827365286819	88.28860581043081	75.53949658425594	82.5507072843464	82.6637479307969	79.08847105973977
Htra1	608.3725464933302	644.1965260328998	603.662571770633	641.5855579983389	632.2389050967842	602.305328281967
F11r	0.4279954737196349	0.47493854515862177	0.6905787721342496	0.5218477928508924	0.4731079356182018	0.6346561728177689
Cdh1	0.0107726303936283	0.005347930266231	0.0383044052457691	0.0326770227902038	0.0053273171697227	0.0217250007599676
Capn7	10.592887737060964	9.85541205792905	10.318397680889245	10.282183251421097	10.174870711890721	11.41638546361487
Itgb1	484.4156195040514	476.8859322410463	509.7265168302234	504.3779692357724	493.541534900076	531.5995562809401
Timp1	319.23541530124714	329.33485445503555	331.774777002871	330.35981560126453	346.26611204599055	345.7231310085904
Mmp2	617.7133433703117	647.1596844253282	604.0931237743388	670.6966692725189	657.9076942510458	624.0135343014572
Vcam1	4.1761918240943094	3.723960664045739	4.370754578063656	4.294306826066092	4.317483751839584	4.258705486548951
Phykpl	1.8450560846905268	1.9172151261917887	1.8055152820085576	1.9387196066294887	2.1424036521639374	1.8695690677795704
Icam5	0.5849287591626636	0.8296568351327224	0.7177189384356437	0.8833032420585835	0.8114324676050393	0.6051284741550057
Lum	445.7753708704437	433.2651523466568	472.0964400267912	476.20857472708803	474.9633957739858	519.8091141543501
Adamts2	5.3213020268324085	5.6554000897934005	5.041347416622953	5.3167643614401365	6.231529727888309	5.914966752901052
Fgf2	2.237312100569616	2.059391463387114	2.699102632475497	2.969105435925642	2.0745037586506783	2.631974087424114
Tnn	1014.1508803048206	982.1611466041568	974.448209813327	1092.8197025576762	1072.6825983624985	1095.8988449885703
Col4a1	280.8203016478587	277.11071736245475	271.15163799988665	306.4159035643247	301.7004711322021	304.2046074555721
Scube1	0.0117161008585824	1e-08	0.0089269620835018	0.0148078761786384	0.0057938848931472	0.0088603878495315
P4ha3	51.79005520002197	53.22787228374005	50.72629452577322	57.57279967365348	59.791770360180166	58.1178675031919
Plg	1e-08	0.043263641745218503	0.008853583873516	0.0704935191280755	0.0172387603261692	0.0175751037395689
Ltbp2	132.84276900026717	136.1854416167327	125.41192651872151	150.28481002343065	154.1700204384545	148.0424866050801
Ceacam1	0.1490367975700714	0.0739872877037034	0.0757046841600095	0.0690676571056514	0.153546051949259	0.18158857032282438
Capn6	1e-08	0.0336426223216253	0.0068847152702756	0.0068521445270814	0.04021553773572	0.0341668171625707
Sparc	4139.99010086605	4180.890162478037	4174.518061484633	4889.41598457246	4930.512110436719	4767.493014475789
Serpinh1	885.003857709869	911.3811069585672	856.6646738991292	1064.473910107604	1068.4764808985965	1046.821874630624
Pcolce	623.9133491536212	662.8745072869775	601.5519509648877	770.4422904285547	788.1741486936434	727.3369435852517
Loxl4	4.919888321521169	5.276247605099337	5.206638493362728	6.414461720046028	5.673678084347948	6.619987816213674
Col16a1	25.00379336846036	23.446384371688694	24.42947589929345	29.032804069216876	30.062069642804648	29.46143833356745
Sdc3	22.51900913092506	24.208767948319284	22.83774352272889	28.921516598311765	29.31588194507375	26.928666825702617
P4ha1	163.6790110487955	159.59531985752912	168.63718039164863	202.4419045608293	198.69353307532612	209.91661052572306
Spock3	1e-08	1e-08	1e-08	1e-08	0.0055759248376429996	1e-08
Icam4	1e-08	1e-08	1e-08	1e-08	1e-08	0.2260427540966103
Hapln1	0.0089436245893088	1e-08	0.0045430053190449	0.018086021737580803	1e-08	0.031563816216512004
Fbn1	100.3925077782138	94.71405493794039	93.39005277013973	123.27283176039012	121.4962850484111	125.49964537556029
Tgfb1	46.52762031674919	47.067321560690544	39.67367879865222	59.105741163966144	61.31975529040857	52.37264547690011
Col2a1	1e-08	1e-08	1e-08	1e-08	0.0463464226619849	0.0047250772561259
Bcan	1e-08	1e-08	1e-08	1e-08	0.0051663109746527	0.0421368109621962
Icam1	21.883412058759053	23.195413799797212	19.98244748224394	28.67905455895089	30.50487911524929	28.274127251354276
Nid2	23.434165625595895	24.91389290785281	22.911604017266562	32.63357175669641	32.13317385118064	31.921405427778623
Itga2	0.181293460780821	0.12214375960806219	0.2368022434471832	0.2094950762302228	0.3073843226247874	0.2807377426616877
Bmp1	20.947414049565094	22.92367367584136	22.84498130515918	28.935295806300932	31.26031990542432	31.269659758619706
Bmp7	1e-08	1e-08	1e-08	0.026323658199695003	1e-08	0.0065628920355152
Mmp10	1e-08	1e-08	1e-08	0.0139681302086479	0.10930615850922279	0.0139298611348917
Timp2	420.0222225090125	427.8786117019858	422.8797627187514	612.2118964666812	611.1316487728687	578.3994597096746
App	246.8160517414219	250.9273330756075	245.8545423188853	355.97205369291476	352.4521928050844	351.87120106202036
Icam2	0.06734420688622039	0.1203555944215961	0.1368325481930775	0.1634222491646597	0.1998194837039333	0.1493933053909266
Capn3	0.2214642621452386	0.1404826086692883	0.13124406417022688	0.2550261673246372	0.2433758719703922	0.2853430037332828
Mmp7	1e-08	1e-08	0.0234913773968193	0.046760474917231704	0.0457399364025409	0.1632132462465148
Col11a2	0.046539423982694	0.0436406277479777	0.0788004911563977	0.0914989760752121	0.1764468455480419	0.0990695736730475
Loxl2	90.17216647574979	88.61221775699309	89.42550392036298	134.99357616322033	132.8240348742509	134.22315949971073
Ctsk	43.76376655790822	47.135052042526034	45.8355205313311	69.05316183058133	69.1657410835728	67.2969688115149
Capn9	1e-08	1e-08	1e-08	1e-08	0.07697237587707799	0.0392370927365726
Pecam1	1e-08	1e-08	0.0064751540684638	0.0257780536475075	0.006303870650902	0.044987992211690704
Sdc2	92.50437635548376	90.4050460529444	92.06819557747157	134.27157924095468	137.86145413873743	145.31532794953674
Ddr2	31.108517357845326	28.589390525905177	31.392845682647383	47.04567726579671	46.53471448470405	49.24232908772844
Comp	0.3059899253388952	0.1250978453724534	0.045714871676820604	0.3184901397289215	0.4450559263455149	0.5263376614716302
Adamts4	1.7799440429212243	1.879911705095515	2.110860130635671	2.961300060775128	3.1842331374087602	3.0461443119038933
Col13a1	1e-08	1e-08	1e-08	0.0041906905597098	0.0040992297301069	1e-08
Col15a1	67.86114822524716	66.03744588170447	65.61551020375484	110.5553178883345	113.42783016306683	111.59494788652661
Mmp17	0.1785431382330689	0.1941535188969805	0.14395668393383018	0.263627172113858	0.3111300515690257	0.294339181640462
Mmp11	5.100893067555326	5.950310394304461	5.011491721321463	8.627803238983693	9.373765352750528	9.069827347030243
Adamts3	0.1122855802439601	0.1463244342138077	0.0570365487417736	0.2164230746554507	0.2429340589429564	0.2087537334539216
Col8a2	57.309238783004275	57.16998775109829	56.160369118510616	98.28010194845015	99.5150529640943	99.10917194887934
Mmp14	159.69256782534765	160.07174733401285	154.363771173037	276.6165730231205	280.77737829278766	272.6206613470732
Col3a1	981.1640535291716	957.6566910066844	955.5129303693294	1845.9344289871199	1803.33433938434	1837.657893184892
Col27a1	0.7122821480440159	0.6867067792004662	0.8468465221779615	1.5082403310622223	1.2379442633274094	1.5717669818259938
Col1a2	1863.5262637035455	1878.7347332412114	1837.64184058136	3599.6595895560467	3596.011754033118	3538.2760564384503
Lama4	38.88455932508241	36.72308581380185	36.41071103349492	73.09809780293972	71.95169353765088	72.55060126744081
Fbln5	40.08095962018014	42.17411945155026	39.23897706831122	81.86027721425089	83.55440184618983	74.02549034733704
Bgn	872.4528209860413	884.1180025048905	828.8743527904053	1755.74224810541	1764.4248830816612	1632.2599878628905
Itga8	2.8360536146556825	2.6112705826358997	2.893514418993658	5.506389812886082	5.36623533387129	5.788681437236912
P3h2	1.873815951562201	1.1938785114143942	1.4251893582894724	2.877420950619904	3.775953849693812	2.990785619048041
Dcn	44.63079586654614	41.47822451834569	47.139190129978246	88.05926672557656	89.61252593425552	98.59010590926492
Tll1	5.551112809848002	5.213790985682853	5.916793449818244	11.469425409847451	10.917655098122145	12.416780114567665
Mmp8	0.07932402884487459	0.0098448414448709	0.0100733601735104	0.15038542480918748	0.19613771785679218	0.15997163375346368
Mfap5	14.370534796532972	14.421768050299832	15.250657139354727	34.425482155601195	31.61871708934084	31.61142349319321
Tgfb3	55.64553443251943	59.20015784129221	56.74783369997554	128.95670240365047	130.1598182580928	128.60339404994602
Col18a1	24.0470834520046	24.138630119426498	22.724367458340826	55.50455045951541	56.528885222016896	51.57584833549061
Col1a1	2526.782231321241	2495.8319610587514	2367.8312553481283	5956.101136185713	6023.940456224581	5759.444283936097
Tnc	59.305933419237824	58.16082334036601	56.329824953160184	167.99822282554382	163.84886160209254	163.35851609205423
A2m	11.44531581296278	10.700139114931241	10.592491981100698	31.84266372894364	31.998128322266464	32.33100596074605
Itga7	6.8674175304271925	5.9684392437334175	5.181302597490207	17.918919326381825	17.691145097924952	17.635508134298753
Sdc1	10.611117049482377	10.83248274990278	11.01195333950477	34.60672366278699	34.178430121856174	31.17025551103655
Itgad	1e-08	0.0056242821268784	1e-08	0.1317347551830911	0.11205188712010039	0.06283097011895909
Scube3	4.156709461969528	3.427633829095281	4.175395134627221	13.742987682188637	14.470017922848077	14.466181840209194
Itgb2	2.8256154879372497	3.3781705898655345	2.8112567849725583	12.564968058114014	11.481948602593457	12.037272758044807
Col23a1	0.640609376572059	0.6803250640872347	0.8814733466214739	3.2427421688629305	2.895274693847417	2.7228183981688647
Col9a2	0.1522457537829803	0.0875140649556242	0.2116528579096171	0.9884418646835746	1.2997259457592427	0.8483774410478744
Mmp9	0.4997413287227106	0.5434347057568754	0.4109926970792275	5.077011613958169	5.405555238533193	4.535195543410697
Itgax	0.0565112740219453	0.057585039652287305	0.052878455390152304	0.6510870612680949	0.6868860395536468	0.6238109744268973
Mmp12	0.9386675663310172	0.9319773867811146	1.0879218287391315	76.98396479987652	83.84233219518345	86.01140971477899
