# Supplementary material for: Peptide-based Self-adaptive Implant Coating Sequentially Regulates Bone Regeneration to Enhance Interfacial Osseointegration
Source: Research Square preprint supplement (doi:10.21203/rs.3.rs-5132912/v1), 2024-10-01
Supplement: Supplementary file 413 [file 779_Transport of inorganic cations_anions and amino acids_oli...(R-RNO-425393).heatmap-data.xls]

id	S1	S2	S3	C1	C2	C3
Slc1a2	0.4069921214214013	0.3195620472712905	0.451442988678366	0.0398917755629948	0.057504840738123904	0.0858463976745929
Slc9a3	0.0034356193478228	0.0034111326770678	0.0069806136605754	1e-08	1e-08	1e-08
Slc26a9	0.5674945299426923	0.6751683139584499	0.780301694638813	0.3462593204614845	0.3870883127785288	0.3157126029944392
Slc8a1	3.059066726587069	2.7973245439318766	3.1252054264307785	1.6730443546162224	1.5248597967534596	1.800286341709458
Slc43a2	5.021947303325969	5.662145092463688	5.1905703388751965	3.0890176973315038	3.1827524803636886	3.3446021141451325
Slc38a4	18.893797436109	19.01159285229631	19.35272697621811	12.020524065269228	11.901883712756124	11.239347563692569
Slc1a1	0.3505523866852571	0.3353973846941169	0.2849063490124073	0.2513359355631987	0.1386849443198443	0.0771222652200413
Slc4a3	1.009563554290664	1.166349949348428	1.4132022703573168	0.8420283209803426	0.7546301583777508	0.7036771348218233
Sri	45.536955015506784	42.919195561684326	49.401702723877094	28.292804876916872	30.107592379656854	33.953850858285506
Slc20a2	7.751010717316457	8.139813503932652	8.17517084634563	5.334101461585253	5.800197455637676	5.351245522658887
Slc6a15	0.2855040998450785	0.3142810930951351	0.3404924481584596	0.1757163992669552	0.14118831231096268	0.28162764251224137
Slc16a10	0.11243220195249329	0.1786093736493962	0.1599108566290609	0.1234258145624285	0.0730746773879151	0.1101310647737012
Slc25a10	3.387331522085225	3.702794339794455	3.23575160142918	2.6477550461583292	2.4917531923391083	2.3512325219384325
Slc8a2	0.08333210521184789	0.0275793970340979	0.08062732762809789	0.008024597912727499	0.007849462762896199	0.0640208307681031
Slc9a4	1e-08	1e-08	0.006373926326005	1e-08	1e-08	1e-08
Slc26a6	1.3894660134143522	1.3226736619072688	1.6735290025284015	1.2166207451241997	1.0200584775760868	1.275877744216411
Slc8b1	7.889840274530473	7.436312610732138	7.43217845976579	6.32396636894588	6.048290292742468	6.034726760000246
Slc4a4	1.6574000473983201	1.226710486747595	1.1837516633519103	0.9801001481400299	1.0232859401153471	1.3926896552288104
Calm2	415.81160235280777	415.75506544869415	434.6957133098708	348.243785874452	352.5207276997657	365.2606928434909
Slc9a9	2.395026054539896	1.954266694825368	2.378962689454064	1.7690393063145367	2.11028091273494	1.9470662127402603
Slc1a6	1e-08	1e-08	0.07152179458179289	0.0118639138838566	0.0116049863717051	0.0118314098241845
Slc38a5	1e-08	1e-08	0.023434165104084703	0.0116616554153057	1e-08	1e-08
Slc7a6	6.424652503997312	5.830495448197291	6.5796809936679885	5.5987266802813735	6.120833797685488	5.773784451234652
Slc17a5	5.763603748080883	5.644014479854397	5.899985502274856	5.507844901772187	5.06611691963001	5.599066200044239
Calm1	326.5764107826183	313.07004261443615	321.13389868926265	295.29327181703377	303.685332761634	312.23041274414726
Slc25a29	1.9823116437466755	1.859443687544012	1.2572771164850887	1.4395821306711118	1.6681321640182944	1.7117222815109583
Slc9a1	9.930577048089686	9.839257448076452	10.141209973670172	9.727157272992164	9.791101844173285	8.944285005527664
Slc1a4	39.88285290574444	40.0226135131139	39.36079823647511	38.3949334160271	38.14361542891098	36.97394246316984
Slc25a26	0.8482851367593258	0.6652468600644714	0.6931783027809127	0.8017744614157117	0.6201251181117086	0.6880088100565149
Slc15a4	5.560038953859702	5.138717867933176	5.221835751057023	5.002779275227823	5.844148874709507	4.644503874957092
Slc36a1	4.404860672370512	4.81413825470864	4.543043530586799	4.614691479674392	4.393880062962892	4.534495402351829
Slc24a4	0.0029542482564186	1e-08	0.021008883549644503	0.014935355001636	0.0058437635416346	0.0029788951959082
Slc4a10	0.0149389498266215	1e-08	1e-08	0.0151049677524433	1e-08	1e-08
Slc17a6	0.0536785935331878	1e-08	0.0060592443109176	1e-08	0.023595820899849802	0.0420983359235343
Slc36a4	6.0591256255486865	6.50047160296289	6.980557631969288	6.521207508458798	6.456109549301707	6.999358607654334
Slc38a3	0.169551395859118	0.07319259247307519	0.08238069566555829	0.037268624628926904	0.1385298991793022	0.17096594755906058
Slc12a3	0.0312126026952406	0.0137734014260574	0.0123314725778397	0.0333127747539238	0.0171503888488473	0.0157365082502263
Calm3	229.62734191777682	238.35214581785704	207.98276253100587	245.80860089711064	243.45430904975774	237.64158599849586
Slc9a5	0.3656867995783026	0.33419903715312277	0.5277106149127551	0.3571455756718015	0.460321234925818	0.5279653259873224
Slc9a8	5.479816551830862	4.91299684063678	5.208678578860805	5.863189733499423	6.117575146156994	5.393973822988029
Slc1a3	24.261901287963568	24.13080021420097	25.461179754025082	28.76613490247265	27.471760147319998	28.153379649580362
Slc9a2	0.0053728758101191	1e-08	1e-08	1e-08	0.021256050225188103	1e-08
Slc24a5	0.0144028199909945	0.0572006364972062	0.131688843290199	0.0873772291154111	0.0997152753447122	0.1307067518533091
Slc12a4	17.291470211973042	17.268749917842573	17.21960338452882	21.31390810086057	21.91265988077613	20.515377499474642
Slc24a1	0.0133398520423634	0.0132447747832967	0.09486543056360619	0.06744045517640179	0.11214657884724419	0.0672556856202942
Slc4a1	1e-08	1e-08	1e-08	0.0053191297595251	1e-08	1e-08
Slc17a7	1e-08	1e-08	1e-08	1e-08	1e-08	0.015864305578208903
Slc7a9	1e-08	1e-08	0.0553756090201266	0.0551136334751902	0.0323464772901947	0.07694768675710459
Slc5a5	1.9468388688530047	2.023828922556636	2.620203687598853	2.977948269071826	3.1104435786023097	2.55032766739359
Slc8a3	0.1161134974113678	0.18179702190200359	0.09981395279810379	0.1986834791918892	0.17667931832215	0.1981391373460951
Slc4a2	18.62615432881508	18.690958322169408	19.08537102654475	25.14357832210872	25.713207285684984	24.50214278104709
Slc20a1	25.0418357386617	26.110874227996632	26.989078366487288	35.7987809506657	34.91632826255329	35.018115828830325
Slc34a1	1e-08	1e-08	1e-08	0.0098200912295416	0.038423049078098404	1e-08
Slc38a2	120.35971458555491	115.8450661658883	118.72140533643976	165.7905029436529	164.5381933541825	173.0251702100399
Slc12a7	5.243398860191371	5.28625014971272	4.605388082645414	7.275283379191363	7.823104663675977	7.002357048832416
Slc26a4	1e-08	0.004912140691674	0.0050261613193361	0.0175083161286417	0.0073398059626309	0.0099773459152546
Slc12a5	0.223907524186242	0.1605584273231274	0.2369499727102346	0.2829947858584237	0.3506367350149085	0.5048592351218701
Slc3a1	1e-08	1e-08	1e-08	0.06347687620668839	0.0827886704263402	1e-08
Slc1a7	1e-08	1e-08	1e-08	0.0575118515454216	0.048220001046192805	1e-08
Slc36a2	1e-08	1e-08	1e-08	0.0099964016649781	0.009778232262255099	1e-08
Slc3a2	56.726485159191206	57.92229776218871	53.63083277408938	90.04123311833648	91.69314615425755	88.69034114964694
Slc7a8	2.1992690683128546	2.046044945167134	1.894153288701316	3.4026844897498787	3.334130656945632	3.8648239634899473
Slc24a3	9.191065841210069	10.462970809909816	10.095802914671724	17.83158036244456	17.206990390400456	16.648122995506974
Slc4a9	0.0823460156519589	0.0148653008570039	0.0456310442352381	0.12110710092695609	0.14807994878027808	0.1207752984992954
Slc4a7	4.460062818421128	3.741231951101157	3.874121014402871	7.173852571554106	7.731565231659937	7.949447493555187
Slc6a12	0.06635210662784849	0.08470181841199599	1e-08	0.4217052756746984	0.4968769687107096	0.9366793353923288
Slc26a2	3.426492006602442	2.6332584552320406	3.035160566635629	6.196922420108867	5.9903619004503	6.802680527262017
Slc15a1	0.015125030520725	0.11262915798954859	0.06914611090357299	0.24468971207726758	0.5160971418904403	0.4346594147194679
Slc7a7	3.581769948516826	4.102057097234669	3.5812134263047777	8.670003531044296	8.906783265974743	8.314800835699497
Slc38a1	1.9737079538441176	2.426963617869604	2.1039498829746086	5.0731820272486905	5.3410850390818725	5.312405148496992
Slc15a3	0.5680838907474066	0.948058785772226	0.5894066921278536	1.8331820955760063	2.2115803207956533	1.9378492240824452
Slc7a5	14.934122914149945	14.684912728091337	13.551027221550092	42.004690355360495	39.997594784639816	38.04380113697415
Slc4a8	0.08407626465593629	0.0737703968400799	0.0456869369141114	0.18386015017332	0.2262596756662111	0.2661625413049217
Slc6a6	3.5652442706595133	3.311922601596986	3.447837429358529	11.575524696247788	11.121722892691231	11.754763607859896
Slc4a5	0.036862832457491	0.016266716445495003	0.037449662642983404	0.1449485537323633	0.16204008831240949	0.1941119193106054
Slc7a3	0.0334556364573579	0.0332171876621007	0.0934676053224208	1.4461223075745224	1.7702692632933992	1.8469772269197375
