# Supplementary material for: Peptide-based Self-adaptive Implant Coating Sequentially Regulates Bone Regeneration to Enhance Interfacial Osseointegration
Source: Research Square preprint supplement (doi:10.21203/rs.3.rs-5132912/v1), 2024-10-01
Supplement: Supplementary file 417 [file 780_ECM proteoglycans(R-RNO-3000178).heatmap-data.xls]

id	S1	S2	S3	C1	C2	C3
Serpine1	767.8254861942345	792.2051369535353	745.0672416179519	407.5959648544919	408.109001266656	399.32975221082927
Itgb3	7.497756414583288	7.451197686924488	7.201764393749754	4.617311963992778	4.811245929609863	4.835244163608864
Vcan	166.28550469835463	153.58321041632627	166.4042159267647	110.39776765583255	110.45180386668396	120.31122999444999
Tnr	0.0418175288050326	0.0113235024092566	0.0270347890800997	0.0096096102398742	0.0150398059817618	0.0057499734370726
Col5a3	10.855264701134438	10.278281073127564	11.147943231127456	8.35824635993656	7.376094417386638	8.1428850744571
Acan	0.0183837208891266	1e-08	0.018676376626042702	0.0061960136329251	1e-08	1e-08
Matn1	0.051455757102923	1e-08	0.0348499342511307	0.0260137999720637	1e-08	1e-08
Col5a1	233.7657514937928	228.37470175507042	218.87007335935377	194.7483148572744	196.07963204033481	195.93188714483017
Itgb6	0.0380755390455398	0.0850593536836848	0.0531872989161353	0.052935676012834	0.047073059885630104	0.047991497126039104
Matn3	0.0195364948392698	0.0096986310768777	0.059542485778076804	0.0098768078703063	0.0096612485800746	0.039398961889776304
Agrn	2.8370333789443887	2.6710724033565563	2.9053368037374536	2.4079540409323332	2.6908139787856524	2.5978547141917643
Itgb1	484.4156195040514	476.8859322410463	509.7265168302234	504.3779692357724	493.541534900076	531.5995562809401
Tnn	1014.1508803048206	982.1611466041568	974.448209813327	1092.8197025576762	1072.6825983624985	1095.8988449885703
Sparc	4139.99010086605	4180.890162478037	4174.518061484633	4889.41598457246	4930.512110436719	4767.493014475789
Hapln1	0.0089436245893088	1e-08	0.0045430053190449	0.018086021737580803	1e-08	0.031563816216512004
Col2a1	1e-08	1e-08	1e-08	1e-08	0.0463464226619849	0.0047250772561259
Bcan	1e-08	1e-08	1e-08	1e-08	0.0051663109746527	0.0421368109621962
Itga2	0.181293460780821	0.12214375960806219	0.2368022434471832	0.2094950762302228	0.3073843226247874	0.2807377426616877
App	246.8160517414219	250.9273330756075	245.8545423188853	355.97205369291476	352.4521928050844	351.87120106202036
Comp	0.3059899253388952	0.1250978453724534	0.045714871676820604	0.3184901397289215	0.4450559263455149	0.5263376614716302
Col3a1	981.1640535291716	957.6566910066844	955.5129303693294	1845.9344289871199	1803.33433938434	1837.657893184892
Col1a2	1863.5262637035455	1878.7347332412114	1837.64184058136	3599.6595895560467	3596.011754033118	3538.2760564384503
Bgn	872.4528209860413	884.1180025048905	828.8743527904053	1755.74224810541	1764.4248830816612	1632.2599878628905
Itga8	2.8360536146556825	2.6112705826358997	2.893514418993658	5.506389812886082	5.36623533387129	5.788681437236912
Dcn	44.63079586654614	41.47822451834569	47.139190129978246	88.05926672557656	89.61252593425552	98.59010590926492
Col1a1	2526.782231321241	2495.8319610587514	2367.8312553481283	5956.101136185713	6023.940456224581	5759.444283936097
Tnc	59.305933419237824	58.16082334036601	56.329824953160184	167.99822282554382	163.84886160209254	163.35851609205423
Itga7	6.8674175304271925	5.9684392437334175	5.181302597490207	17.918919326381825	17.691145097924952	17.635508134298753
Itgax	0.0565112740219453	0.057585039652287305	0.052878455390152304	0.6510870612680949	0.6868860395536468	0.6238109744268973
