# Supplementary material for: Peptide-based Self-adaptive Implant Coating Sequentially Regulates Bone Regeneration to Enhance Interfacial Osseointegration
Source: Research Square preprint supplement (doi:10.21203/rs.3.rs-5132912/v1), 2024-10-01
Supplement: Supplementary file 421 [file 781_Immunoregulatory interactions between a Lymphoid and a no...(R-RNO-198933).heatmap-data.xls]

id	S1	S2	S3	C1	C2	C3
Itgb7	0.9178761568323343	1.2966136440408322	0.841513651283352	0.369721580703911	0.08856796077756439	0.1504933276502014
LOC685157	0.0127921329741734	1e-08	0.0129957745674462	1e-08	1e-08	1e-08
Cd300lg	0.0090409491466953	1e-08	0.009184874533922499	1e-08	1e-08	1e-08
RT1-N3	2.2919505077658804	2.165757776133875	2.098269436796276	1.235957968328539	1.354895204193649	1.652283691989005
Pvr	22.35796455447812	24.183256438324342	22.450647192849583	15.37037682206415	15.657308344613641	15.2784988270459
Cd34	0.3400039000525069	0.519354741009244	0.6022646987243467	0.2291882680921166	0.3362794100021865	0.33404973905661617
RT1-N2	3.4569193883063	4.090412351517619	3.528999417773924	2.180343389046428	2.72196325604434	2.7158471096848453
Cd200r1l	0.2833594071601507	0.3692585046128552	0.4857811063255509	0.1343008217293716	0.1401277127261091	0.3125100210628856
RT1-M3-1	8.259844065300616	6.80768987592332	7.7597291114009765	5.388152606614248	4.725932930907102	6.197310314906786
Cd300e	0.1628768431913678	0.1684541336052721	0.17236429929738478	0.11665323059030809	0.1275316821249409	0.11633363062725009
Cd247	0.0551618495461737	1e-08	0.056039987202895804	1e-08	0.0136394056424583	1e-08
Ifitm3	798.8654959077245	870.0834648102046	826.8363927417474	646.099562945843	639.5592782170793	628.2409448524413
Col17a1	0.10599363901765989	0.1428232529469812	0.0999894849117375	0.10717155677113249	0.07113638154978709	0.09160965928615619
Ifitm2	109.93459112697721	133.4068421179486	104.77358672136072	91.73720366527154	99.32562965121564	81.59447891750031
Siglec5	1e-08	1e-08	0.036894427506661	1e-08	1e-08	1e-08
Cd3g	0.027185107158662503	1e-08	1e-08	1e-08	1e-08	1e-08
Cd3d	1e-08	1e-08	0.0149411033008341	1e-08	1e-08	1e-08
Cd226	1e-08	0.0028740268081114	1e-08	1e-08	1e-08	1e-08
RGD1559588	0.7239425936189403	1.0869398790542955	0.4663938694876351	0.7141344779380357	0.4889840405047187	0.4273067633817353
RT1-S3	3.8060296225847017	3.5113699054294973	4.294342267325817	3.0480107416745765	3.57278925411996	3.1245666753752634
Npdc1	21.860929641387802	26.17616232854631	21.041477624126237	19.739460559078267	20.405582707036082	18.378410421319924
Cd99	137.94991038649025	139.52713385655738	134.80416517156587	117.53953855114311	121.66535762582028	123.93784581183927
Itgal	0.11632891392011879	0.1522497347030374	0.1181807881856959	0.1657396480451768	0.0732165782120174	0.1066358512023424
Hcst	1e-08	0.4730273236891706	0.4356065329961513	0.2890304893274364	0.5183244878654144	0.048039778300210105
Klrk1	0.0075649363978259	0.030044045131439902	0.0384267835053402	0.076489971781542	1e-08	1e-08
RT1-CE5	4.776473273237653	5.589292312831951	4.539995997069818	5.660871486475793	4.843084089248238	4.6245723905521805
RT1-CE3	0.4733277386395821	0.8694152295332492	0.5770353374804924	0.5862701468533282	0.6905106030874356	0.7039830813978328
Oscar	0.0119165775013563	0.0059158271842857995	0.0605313643390614	0.006024508751289	0.029465085890917203	0.0540719485019728
RT1-A2	14.895497222288903	17.679430950179764	14.265862299048704	16.928437995059163	16.102315499597207	15.242434031567582
Itgb1	484.4156195040514	476.8859322410463	509.7265168302234	504.3779692357724	493.541534900076	531.5995562809401
Vcam1	4.1761918240943094	3.723960664045739	4.370754578063656	4.294306826066092	4.317483751839584	4.258705486548951
Treml2	1e-08	1e-08	0.0517983739413071	0.0103106723762371	0.0050428270366281	0.0668356997044913
Icam5	0.5849287591626636	0.8296568351327224	0.7177189384356437	0.8833032420585835	0.8114324676050393	0.6051284741550057
Pianp	0.057322346979548904	0.0528485224285964	0.08319267890659869	0.0413995570130082	0.13768644244257888	0.09082948027399239
Lair1	1e-08	1e-08	1e-08	1e-08	1e-08	0.0054886915736102
Sftpd	1e-08	1e-08	1e-08	1e-08	0.018720107776259702	1e-08
Icam4	1e-08	1e-08	1e-08	1e-08	1e-08	0.2260427540966103
Col2a1	1e-08	1e-08	1e-08	1e-08	0.0463464226619849	0.0047250772561259
Nectin2	10.12486537612589	10.960911921603113	10.243483156420327	13.562768747915985	13.909038178285284	13.905819995042412
Cd1d1	4.296919429722053	4.714703201525588	4.876577448548013	5.871177730397926	6.023811222067393	6.5056580059685185
Icam1	21.883412058759053	23.195413799797212	19.98244748224394	28.67905455895089	30.50487911524929	28.274127251354276
B2m	252.42095476782066	270.51943267371985	267.8684790070062	348.255784914839	350.7704676449791	368.932130165915
Icam2	0.06734420688622039	0.1203555944215961	0.1368325481930775	0.1634222491646597	0.1998194837039333	0.1493933053909266
Cd33	0.7071229500585272	0.4852632959229397	0.6021713460639229	1.0829863419609718	1.2753344181881963	0.6396230471354731
Cxadr	0.3814581546582865	0.4773694270720867	0.6216638249033103	0.6789880127451297	0.750629122729869	1.0577617014136564
RT1-M2	1e-08	1e-08	1e-08	1e-08	0.0169824917390144	0.017313835123426
Cd40	0.4392249946157606	0.4625244687758922	0.7031300443709035	1.076620944800344	1.0531238916459131	0.8186743526405128
Col3a1	981.1640535291716	957.6566910066844	955.5129303693294	1845.9344289871199	1803.33433938434	1837.657893184892
Col1a2	1863.5262637035455	1878.7347332412114	1837.64184058136	3599.6595895560467	3596.011754033118	3538.2760564384503
Fcgr3a	0.16135073998429358	0.2002509255907306	0.1639193300295947	0.876898132332005	0.7580204598192826	0.3660679548157413
Siglec10	0.9198402026265496	0.9893912284350053	0.9656328577107592	2.0306363990764433	2.0393877029650906	1.9168629694078039
Slamf6	0.014482101513880699	0.0718943754139198	0.0735631910836178	0.2635745939004328	0.47267389164974477	0.2920582955682503
Col1a1	2526.782231321241	2495.8319610587514	2367.8312553481283	5956.101136185713	6023.940456224581	5759.444283936097
Fcgr2b	2.1320648074201642	2.3068443236275917	2.131294147316972	5.942155251661032	5.1703937685417785	5.808735872772688
Pilra	0.7079866433114813	0.6248360894777881	1.2986589916713427	4.692824342955934	3.9485257496798174	4.6204760971533565
Cd8b	0.3387980650504862	0.2429435293756543	0.15297400182412088	1.2180023266994033	1.3031152423267642	1.2716027481786158
Itgb2	2.8256154879372497	3.3781705898655345	2.8112567849725583	12.564968058114014	11.481948602593457	12.037272758044807
Cd8a	0.2386573712330679	0.3723600278457445	0.1558649789914235	4.360808925420108	4.0633124640405605	3.7472402808816216
C3	0.8214797367956509	0.9824571335865516	0.635401442825146	11.510540568596815	11.47629451084744	10.895406202913133
