# Supplementary material for: Peptide-based Self-adaptive Implant Coating Sequentially Regulates Bone Regeneration to Enhance Interfacial Osseointegration
Source: Research Square preprint supplement (doi:10.21203/rs.3.rs-5132912/v1), 2024-10-01
Supplement: Supplementary file 425 [file 782_Amino acid transport across the plasma membrane(R-RNO-352230).heatmap-data.xls]

id	S1	S2	S3	C1	C2	C3
Slc43a2	5.021947303325969	5.662145092463688	5.1905703388751965	3.0890176973315038	3.1827524803636886	3.3446021141451325
Slc38a4	18.893797436109	19.01159285229631	19.35272697621811	12.020524065269228	11.901883712756124	11.239347563692569
Slc6a15	0.2855040998450785	0.3142810930951351	0.3404924481584596	0.1757163992669552	0.14118831231096268	0.28162764251224137
Slc16a10	0.11243220195249329	0.1786093736493962	0.1599108566290609	0.1234258145624285	0.0730746773879151	0.1101310647737012
Slc38a5	1e-08	1e-08	0.023434165104084703	0.0116616554153057	1e-08	1e-08
Slc7a6	6.424652503997312	5.830495448197291	6.5796809936679885	5.5987266802813735	6.120833797685488	5.773784451234652
Slc25a29	1.9823116437466755	1.859443687544012	1.2572771164850887	1.4395821306711118	1.6681321640182944	1.7117222815109583
Slc1a4	39.88285290574444	40.0226135131139	39.36079823647511	38.3949334160271	38.14361542891098	36.97394246316984
Slc36a1	4.404860672370512	4.81413825470864	4.543043530586799	4.614691479674392	4.393880062962892	4.534495402351829
Slc36a4	6.0591256255486865	6.50047160296289	6.980557631969288	6.521207508458798	6.456109549301707	6.999358607654334
Slc38a3	0.169551395859118	0.07319259247307519	0.08238069566555829	0.037268624628926904	0.1385298991793022	0.17096594755906058
Slc7a9	1e-08	1e-08	0.0553756090201266	0.0551136334751902	0.0323464772901947	0.07694768675710459
Slc38a2	120.35971458555491	115.8450661658883	118.72140533643976	165.7905029436529	164.5381933541825	173.0251702100399
Slc3a1	1e-08	1e-08	1e-08	0.06347687620668839	0.0827886704263402	1e-08
Slc36a2	1e-08	1e-08	1e-08	0.0099964016649781	0.009778232262255099	1e-08
Slc3a2	56.726485159191206	57.92229776218871	53.63083277408938	90.04123311833648	91.69314615425755	88.69034114964694
Slc7a8	2.1992690683128546	2.046044945167134	1.894153288701316	3.4026844897498787	3.334130656945632	3.8648239634899473
Slc6a12	0.06635210662784849	0.08470181841199599	1e-08	0.4217052756746984	0.4968769687107096	0.9366793353923288
Slc7a7	3.581769948516826	4.102057097234669	3.5812134263047777	8.670003531044296	8.906783265974743	8.314800835699497
Slc38a1	1.9737079538441176	2.426963617869604	2.1039498829746086	5.0731820272486905	5.3410850390818725	5.312405148496992
Slc7a5	14.934122914149945	14.684912728091337	13.551027221550092	42.004690355360495	39.997594784639816	38.04380113697415
Slc6a6	3.5652442706595133	3.311922601596986	3.447837429358529	11.575524696247788	11.121722892691231	11.754763607859896
Slc7a3	0.0334556364573579	0.0332171876621007	0.0934676053224208	1.4461223075745224	1.7702692632933992	1.8469772269197375
