# Supplementary material for: Peptide-based Self-adaptive Implant Coating Sequentially Regulates Bone Regeneration to Enhance Interfacial Osseointegration
Source: Research Square preprint supplement (doi:10.21203/rs.3.rs-5132912/v1), 2024-10-01
Supplement: Supplementary file 429 [file 783_Activation of Matrix Metalloproteinases(R-RNO-1592389).heatmap-data.xls]

id	S1	S2	S3	C1	C2	C3
Mmp16	4.214634796651103	3.8179454712234278	4.01055265804312	2.9749136295249023	2.7829477070654	3.2399643698213545
Mmp15	0.3597005700474896	0.2586163574580342	0.2709198343103065	0.100330478465679	0.17788016380432908	0.3064202502868042
Mmp24	0.044654832489759703	0.06650484024144769	0.10774353759842459	0.0846582774597689	0.0441656720803413	0.022513696794157902
Ctrb1	0.1131846162389822	0.11237791387357439	0.2069755758977889	1e-08	0.1343337135455123	0.1826062420856938
Furin	35.022464339769485	36.26288423523593	32.56353924609043	33.916017439035635	34.96866210833662	31.658982154811092
Timp1	319.23541530124714	329.33485445503555	331.774777002871	330.35981560126453	346.26611204599055	345.7231310085904
Mmp2	617.7133433703117	647.1596844253282	604.0931237743388	670.6966692725189	657.9076942510458	624.0135343014572
Plg	1e-08	0.043263641745218503	0.008853583873516	0.0704935191280755	0.0172387603261692	0.0175751037395689
Spock3	1e-08	1e-08	1e-08	1e-08	0.0055759248376429996	1e-08
Mmp10	1e-08	1e-08	1e-08	0.0139681302086479	0.10930615850922279	0.0139298611348917
Timp2	420.0222225090125	427.8786117019858	422.8797627187514	612.2118964666812	611.1316487728687	578.3994597096746
Mmp7	1e-08	1e-08	0.0234913773968193	0.046760474917231704	0.0457399364025409	0.1632132462465148
Ctsk	43.76376655790822	47.135052042526034	45.8355205313311	69.05316183058133	69.1657410835728	67.2969688115149
Mmp17	0.1785431382330689	0.1941535188969805	0.14395668393383018	0.263627172113858	0.3111300515690257	0.294339181640462
Mmp11	5.100893067555326	5.950310394304461	5.011491721321463	8.627803238983693	9.373765352750528	9.069827347030243
Mmp14	159.69256782534765	160.07174733401285	154.363771173037	276.6165730231205	280.77737829278766	272.6206613470732
Mmp8	0.07932402884487459	0.0098448414448709	0.0100733601735104	0.15038542480918748	0.19613771785679218	0.15997163375346368
Col18a1	24.0470834520046	24.138630119426498	22.724367458340826	55.50455045951541	56.528885222016896	51.57584833549061
Mmp9	0.4997413287227106	0.5434347057568754	0.4109926970792275	5.077011613958169	5.405555238533193	4.535195543410697
