# Supplementary material for: Peptide-based Self-adaptive Implant Coating Sequentially Regulates Bone Regeneration to Enhance Interfacial Osseointegration
Source: Research Square preprint supplement (doi:10.21203/rs.3.rs-5132912/v1), 2024-10-01
Supplement: Supplementary file 433 [file 784_Collagen degradation(R-RNO-1442490).heatmap-data.xls]

id	S1	S2	S3	C1	C2	C3
Col11a1	286.6589469035739	272.4645788976701	290.4201070496098	137.30029263542065	136.51216046354577	147.40066171407025
Col5a3	10.855264701134438	10.278281073127564	11.147943231127456	8.35824635993656	7.376094417386638	8.1428850744571
Col10a1	0.0076877436445438	0.076329417436207	0.0468607117162526	1e-08	0.0304140909325986	1e-08
Mmp15	0.3597005700474896	0.2586163574580342	0.2709198343103065	0.100330478465679	0.17788016380432908	0.3064202502868042
Mmp20	0.0072101864997549	1e-08	1e-08	1e-08	1e-08	1e-08
Col8a1	205.20255149085168	192.13079881767	204.88908264996545	168.37986747405037	164.22181312922814	180.115879950907
Col5a1	233.7657514937928	228.37470175507042	218.87007335935377	194.7483148572744	196.07963204033481	195.93188714483017
Ctsl	907.3431676286376	911.3895803734044	922.6108790247878	848.5319481722673	829.5523642786392	852.5543503857023
Tmprss6	0.029896751951003903	1e-08	0.0075931792595779	0.0151145037106203	0.0073923213377844	0.007536551933461
Furin	35.022464339769485	36.26288423523593	32.56353924609043	33.916017439035635	34.96866210833662	31.658982154811092
Mmp2	617.7133433703117	647.1596844253282	604.0931237743388	670.6966692725189	657.9076942510458	624.0135343014572
Phykpl	1.8450560846905268	1.9172151261917887	1.8055152820085576	1.9387196066294887	2.1424036521639374	1.8695690677795704
Col4a1	280.8203016478587	277.11071736245475	271.15163799988665	306.4159035643247	301.7004711322021	304.2046074555721
Col2a1	1e-08	1e-08	1e-08	1e-08	0.0463464226619849	0.0047250772561259
Mmp10	1e-08	1e-08	1e-08	0.0139681302086479	0.10930615850922279	0.0139298611348917
Mmp7	1e-08	1e-08	0.0234913773968193	0.046760474917231704	0.0457399364025409	0.1632132462465148
Col11a2	0.046539423982694	0.0436406277479777	0.0788004911563977	0.0914989760752121	0.1764468455480419	0.0990695736730475
Ctsk	43.76376655790822	47.135052042526034	45.8355205313311	69.05316183058133	69.1657410835728	67.2969688115149
Col13a1	1e-08	1e-08	1e-08	0.0041906905597098	0.0040992297301069	1e-08
Col15a1	67.86114822524716	66.03744588170447	65.61551020375484	110.5553178883345	113.42783016306683	111.59494788652661
Col8a2	57.309238783004275	57.16998775109829	56.160369118510616	98.28010194845015	99.5150529640943	99.10917194887934
Mmp14	159.69256782534765	160.07174733401285	154.363771173037	276.6165730231205	280.77737829278766	272.6206613470732
Col3a1	981.1640535291716	957.6566910066844	955.5129303693294	1845.9344289871199	1803.33433938434	1837.657893184892
Col1a2	1863.5262637035455	1878.7347332412114	1837.64184058136	3599.6595895560467	3596.011754033118	3538.2760564384503
Mmp8	0.07932402884487459	0.0098448414448709	0.0100733601735104	0.15038542480918748	0.19613771785679218	0.15997163375346368
Col18a1	24.0470834520046	24.138630119426498	22.724367458340826	55.50455045951541	56.528885222016896	51.57584833549061
Col1a1	2526.782231321241	2495.8319610587514	2367.8312553481283	5956.101136185713	6023.940456224581	5759.444283936097
Mmp9	0.4997413287227106	0.5434347057568754	0.4109926970792275	5.077011613958169	5.405555238533193	4.535195543410697
Mmp12	0.9386675663310172	0.9319773867811146	1.0879218287391315	76.98396479987652	83.84233219518345	86.01140971477899
