# Supplementary material for: Peptide-based Self-adaptive Implant Coating Sequentially Regulates Bone Regeneration to Enhance Interfacial Osseointegration
Source: Research Square preprint supplement (doi:10.21203/rs.3.rs-5132912/v1), 2024-10-01
Supplement: Supplementary file 445 [file 7_Cell Cycle Checkpoints(R-RNO-69620).heatmap-data.xls]

id	S1	S2	S3	C1	C2	C3
Clip1	14.929776150279931	15.036566615557177	15.255687515000101	5.7206526081480655	5.750907895329468	6.094231815302344
Sgo2	2.199520901654152	1.4808653470148054	1.8630957520912732	0.7100255792530247	0.780628087270033	0.7783031287284788
Nuf2	7.508051723087072	5.913583434743948	5.713942828420977	2.669092586743365	2.7945173286305387	2.608276841829059
Spdl1	3.8093103928158176	4.1575607557987375	3.9179662245516793	1.089546842849893	1.8136748242561247	1.7346863181146555
Orc1	0.7782891359688053	1.0303226953929707	1.0756082991222375	0.4820883566266923	0.2149790185463816	0.24038378398192228
Ska1	2.1255695605125626	2.9638986110938546	2.4610890088271735	0.9955812353268825	0.6956091877653761	1.3080452127405744
Cenpi	1.9291406714277248	1.9875462208193608	2.335713111169468	0.9819697732618664	0.78411303404356	1.105852957629448
Ccnb1	6.127544165985409	6.593853348265486	6.1074971496636286	2.7430520308091944	2.7189612323887493	3.2315807696778416
Cenpu	1.8542297631227975	1.5487896271393962	1.6744424860760836	0.8332604513342873	0.7131903602715653	0.8012997624182977
Gtse1	21.075474580034466	19.75901942105583	18.28604257122436	9.37318693622129	8.9345975967416	9.475321390395205
Cenpm	8.366304277568934	8.437283087092917	7.323459897477765	4.415850492494844	2.2117795622650935	2.838563163818753
Cenpt	2.8422815718145333	2.7109204389441555	2.523745552336556	1.221959682997753	1.5273158133544122	0.9478092004523513
Cdc20	16.60411794333861	16.631549700186856	16.25825091022395	7.5171005888927915	8.026299970205978	8.277111272570885
Bard1	0.7406862465210416	0.643481250712456	0.5547109433566169	0.328851629325677	0.3357624374602408	0.2728932516636564
Ccne2	1.8764803973981519	1.5811887567442018	2.351586318753554	1.1359038585003443	0.7997571381728963	0.921171333537607
Clspn	1.8313657987813599	1.2550795175965956	1.3295910197722138	0.6684250221803721	0.6450011377952736	0.8242341104852702
Ccna2	8.507977483441698	9.338513823572733	10.056161487752584	4.665560973017762	4.663763055729668	5.098935374699298
Pkmyt1	1.4606104926269765	1.1979915219604544	1.649760040025824	0.5687219250699633	0.816519033351414	0.8415978512869007
Cenpa	0.6747355560477758	0.9304534726788303	0.9139691579855924	0.450611322229661	0.3872244916009663	0.4829750244588414
Aurkb	5.8815742707038225	6.626176158747178	6.2287651434114615	3.5659676370519526	3.123227835191288	3.1841647991633817
Mcm10	0.8072120426771056	0.6118663889644341	0.6319476451519734	0.36859863081383837	0.33193863523212547	0.3850929913742655
Ndc80	1.9752373866805144	2.005175290017522	2.2618956656860925	1.006064982664817	1.0620569322687778	1.2417185894260694
Kif18a	0.7462523464179286	0.5405171158231228	0.739489564509641	0.3525335693243324	0.24804251453168188	0.419414117329864
Plk1	8.508179246048215	9.04787147459503	7.48090254815866	4.858141517862324	4.5278564362995075	4.082723136744948
Cdca8	11.910258319067484	12.786093176327137	11.10238164738909	6.201157049792885	6.276925294779472	6.930285118313554
Birc5	3.892487234021695	3.99314106925691	4.716440488945464	2.4059038215360826	2.4685071467523163	1.9820405651453183
Mcm3	6.460632922740817	6.84757050684871	7.2198298151234175	4.205252189186788	3.5703351110201718	3.6562818706742166
Rpa1	24.73219407314975	26.08167812960536	25.38747117063521	15.179943638339742	13.050255328275787	14.335194193308284
Mad2l1	3.0640968639936017	3.187415522584354	3.1933271699179318	1.687659413732597	1.596602329088439	2.076153474800388
Ercc6l	0.6274728300676701	0.5701043541410307	0.8238892473412486	0.18554553479157548	0.2927355389762624	0.4476706008475837
Bub1b	2.5936890606831686	2.500092933437683	2.6349787646519056	1.3604286159717114	1.5017559870393378	1.5746453866006593
Wee1	3.3626699744502164	3.1309000646962297	4.214732461619324	2.0268562885730437	2.014820857638624	2.26986254880946
Cenpe	1.8181163326766647	1.899050492665623	2.500968097216545	0.9530893727448336	1.3848555400191132	1.3626596114462222
Kntc1	2.105546315453509	1.871877614572824	2.0034667076714667	1.3495692342177366	1.1055964272158727	1.1238029212596234
Cdk1	15.272179921277324	17.267849429080112	15.51530227525721	9.598524579023922	9.299448489796799	10.028917301520467
Sgo1	0.8864263212157493	0.9364354236618109	1.0446236191883014	0.5807876712900373	0.3857551245539247	0.6793044904715256
Ube2c	14.120039236033772	12.324748366671969	11.34974794861532	8.001371306977425	7.397039326726524	7.948157638678813
Cenph	1.8894912956913408	1.385891824672067	1.6774626561475725	0.8950040487896317	0.9764866055786181	1.2530056417037567
Cdkn1a	225.2471563782602	244.81389495302528	229.08205393192696	155.36096672887274	156.42312077928767	141.03910800197
Orc5	8.082289937182736	7.274973863313582	9.195889997451605	5.504627212351034	5.467469889777122	5.141749368396393
Mcm2	12.154725901724852	12.346643413552636	11.60718484091374	8.134104769820254	7.914958269761027	7.673342680926198
Cdc6	1.1190998154750487	1.6626886050333796	1.1123773609522782	0.8466172272433714	0.6449936270575248	0.9254801842105776
Bub1	3.1825564112359	2.836302300771473	3.579821702112984	2.074917706593962	2.3569931723379063	1.8946574783613863
Psmd5	24.84937545407105	25.12127143210949	27.330054709939184	16.941852294213874	16.984968410150618	17.070821104024734
Spc25	2.908607516279652	2.256822362349511	2.714140015985928	1.6120659743167205	1.8112844477057184	1.7923117476973323
Cenpn	2.6132840048973693	2.9560571402413154	2.6738491154177106	1.8590648635323852	1.7354128424016502	1.9104376385283823
Nup85	9.01484025284536	9.879637085463495	8.555522052498869	6.195908090098006	6.286407321413134	6.029349782957658
Mcm4	12.913458511791037	13.159381875668604	12.434623109717299	8.812197981919208	8.248145732098463	9.367251267028404
Cenpp	1.293891792797546	1.7128930876212587	0.8982345899526994	0.9157896617123417	0.7038449977024889	0.717577641959697
Ppp2r1b	7.935970854646763	8.369955532777825	7.855258379420309	5.60130365104004	5.650085858785452	5.461409965462785
Brca1	0.6395991068216977	0.8326806294901333	0.7293461024966188	0.4718321763974695	0.5809525482108846	0.5067348206617265
Cdc7	1.982097286664931	1.54322847519021	1.9846774862812366	1.3120527540070224	1.3045726775244455	1.3084580653529696
Nsl1	1.0600005798219476	0.711308078556491	1.017461247840381	0.5248028567648064	0.7953296348814787	0.6707917978708263
Rfc2	9.390707531510621	10.339237859159946	9.020685090378633	6.753092493125236	7.28007206569239	6.797092750617763
Cdc25c	2.4377000290796165	2.3724774874015107	2.5703444698093803	1.7257593665111304	1.906554337118127	1.721031227641095
Rfc4	7.7547968629324355	6.716987864386223	6.946018916877165	5.657874135912343	5.534392077575538	4.426813552727879
Cenpq	1.0007270571966407	1.7345803262652097	1.499139650865217	0.4458992284657513	0.972989160752047	1.1116939318755659
Mre11	7.09320875476854	6.435527943463508	7.358426226850015	4.986120894209981	5.0840972343394855	5.167380638777174
Psmd8	91.22345667127793	94.13063046150059	86.18710693586323	68.68964632715287	63.585238330265	66.91497253669147
Psmb9	21.08841436368938	23.58292455500913	21.87516132991819	16.958461953316043	16.97866069062322	15.29541186395911
Nup133	5.854137064597192	6.332025568953652	6.41100004656482	4.424013484441193	4.7668268195440735	4.730972689427562
Rfc5	5.500700999948267	5.32900665465081	5.422578392694733	4.287556928447136	3.871367807106238	4.09640550003508
Psmc6	36.34676219004507	33.87018123191189	38.045754384230975	26.668142857387103	25.98529080131754	29.70687141622505
Psmb10	19.127450698220663	20.75609761409436	18.468776671062162	14.522985966756082	16.29238780887907	13.90960475465365
Cdc16	24.857475658468246	24.34137801442713	26.335618837935172	18.47113950080017	19.684514042340023	20.03728453059317
Rad9a	3.6306603525299135	3.839878066757457	4.0733404729620855	2.9926697647028306	2.903936457444523	3.0720150867496407
Mcm7	8.000859609380992	9.017326170682873	7.7254776435256876	6.413514491920223	7.0488220319246135	5.805408585375058
Psmd10	11.417759787396937	10.10594963599909	12.472424322112259	8.437115019769323	9.249870737177364	9.080454888322706
Mad1l1	5.60935989937482	6.193903657385257	5.541090408718754	4.966002223043999	5.019540812533292	3.6751996204517785
Psmc3	138.3223079604702	145.37802076591848	134.58005642524108	108.13683384883	112.43324906975691	109.3664067202914
Cdc25a	3.713246637315364	3.3442592609454045	3.4537475162712363	2.67635844493424	2.890908757082136	2.7385976730393464
Clasp2	5.6021295082798535	5.008536605770597	5.865624221685817	4.3068421352462485	4.282848075239665	4.455079319884166
Psma6	79.50491631248433	74.77579027515682	80.48808802619382	61.767406112484444	65.01002931761006	59.70019611797286
Ywhae	349.48916020861515	333.63829035462817	347.00750044747537	267.9780181024126	267.852307692353	283.6948810025157
Xpo1	26.71475668331078	26.95162229932712	28.96738407860952	21.86842853813684	21.921987591412076	22.530101980530898
Psmd3	52.57499424357464	55.44829284086258	50.306145096409786	44.06312442463773	45.489560499600785	38.51341509541822
Orc6	3.6807225610365726	3.262936511089768	4.106571427576951	2.8909065322389593	2.925323824891172	3.1480883657174514
Rpa2	2.416785417131525	2.5117474566096942	2.372354092644646	1.6883354389521803	2.011586677832641	2.240726615302858
Psme2	40.304102812081894	46.686316560088	42.89807053371671	36.4022733628112	35.48573650838833	33.86696354694304
Psmd14	39.7567984788289	41.032421836661726	38.74667385657772	31.149167430302146	29.67732605104177	36.54195310199728
Babam1	37.52503851426275	40.200223080648634	37.96053211136904	32.64144777865645	29.89605914690281	31.700460332737826
Chek1	1.2863330575454823	1.1197062644241962	1.2978598169133908	0.8908412393068893	1.0979624777509673	1.030544650760453
Rad50	8.644175619287969	7.645997325678217	9.193261779964994	6.180674704835286	6.794257887117302	7.8564862138462574
Anapc2	48.84798065410327	53.38330505745795	46.54091741007875	40.19850068209382	41.788627903454305	39.658657026968804
Uba52	735.200981392038	822.1241918817526	721.6862510941656	625.5423064884333	661.8501580718869	588.9355328583767
Ube2v2	9.873230864823588	9.581895102194075	11.613072229684256	7.759973079443058	8.337668166544074	9.561186387771995
Ube2n	44.936069803073686	44.36283640403301	44.81021775965042	37.497930655341726	35.3408757072553	39.113223387887075
Zw10	4.424304023012232	4.531061540147384	4.9566947877305445	3.56220899137638	4.136788592488082	3.928348170517205
B9d2	4.230904457135173	4.900874377110951	4.053181394078174	4.015243442642043	3.1567718585214504	3.98553128901924
H2ax	23.625834193546428	26.64751930400493	23.274609302933666	20.30424908320505	21.69178905980446	20.68880804327083
Ccna1	0.3155446143597987	0.1904346016385955	0.0942846724549635	0.13137406769272938	0.15910372054889618	0.1434916722523393
Cenpl	1.892880939339724	1.512054507017538	2.0453879061323645	1.4528367804516649	1.5402654386251016	1.657075259067606
Psmd13	68.67153187738668	71.21205795995517	68.7948964062077	59.59230296418829	60.195557032534545	58.655795072541295
Psmd9	52.990485087607034	60.24770939845778	50.79171021606191	48.164982900265514	45.45715267675337	46.651146111616015
Hist1h4b	11.126570806098622	11.46448853924562	11.13664825738103	9.255108325469864	10.823986544369207	8.769185246355962
Nudc	87.24527450720596	86.99049845205109	87.80790724049803	76.5338494745314	72.2309492674684	75.82093005706616
Chek2	2.1578913655332435	1.5996125815084716	2.25176139913644	1.6586178039466408	1.487217212881465	2.008517959864623
Dynll1	101.90785442587587	109.57451492155263	106.47023087174433	93.25563762224708	89.8401095984251	90.10506038233683
Psmf1	27.10694884066165	25.173438582461092	24.41442560416763	22.82202182768185	22.33914245499374	20.77501617400908
Psmd6	52.17358166723689	51.68612751030013	53.418127763178454	46.17577230382905	43.36875963165845	46.15198552823482
Ppp2r5a	12.997481892088985	11.67322447265926	12.787411834265553	10.365980916890543	10.744160719113362	11.257294374611044
Babam2	26.13072450115817	27.636988820069828	28.289672867741082	23.62999807314357	23.908321150355768	23.44327306283894
Anapc4	15.862471949789281	15.718424527672587	17.668778379934	13.734878757658027	14.250115504378353	14.672925887714637
Atm	2.2861987022173063	1.9787482266289615	2.4174705561128826	1.8885665507921943	1.9489531255317936	1.9662616253974488
Dync1li2	48.767305028071846	46.236393496264064	52.56351529242	41.35996269344591	40.74599482193327	46.1081392703404
Ska2	4.462367185529828	4.92857144881005	4.006264822907385	3.4276889620628483	4.276633011844593	3.941506843466916
Ube2e1	25.52651947935589	27.09291383722502	27.924793064730483	23.1205836423244	23.38178719785084	23.58613268672361
Rad17	6.869108092394482	6.282561516807318	7.126238599095477	5.776976164470722	5.5389958210730335	6.364154393653476
Ubc	153.4559036116401	114.67484802974596	130.04403504003866	121.81857284109205	116.87234083042169	108.482240280207
Ywhab	121.34647770286459	118.38566336037469	122.43826347839826	103.40496654173793	104.71493499624876	107.88439955571583
Psme3	41.17675870861019	41.95229900883179	43.57872166693553	36.264250396372255	37.593640276848404	36.80352900715506
Psmc2	89.19012003458919	83.344403684756	85.92068854577239	74.85358933282703	76.43961392380159	74.43620805681391
Nbn	13.607693889505795	13.320648682916367	15.151791610739087	11.46155700375819	11.77938959073903	13.51980920705603
Ppp2r1a	106.93804625204957	112.42588843419584	103.04062741364869	97.40272612049104	96.45423553572935	88.34465525697485
Psma3	45.59505397623938	48.01657045085328	48.67477002933713	40.92621564695454	40.92159167917298	42.721288679602004
Atr	2.22096093158003	1.7613487421297673	2.205549932337465	1.7235307680138707	1.6831692374587768	2.0127418230732803
Psmb7	155.54056822694514	148.24019029638487	151.3346756383	126.40642948436155	135.0679321450557	137.89973647191138
Ywhaq	146.0062871033302	146.3992943674979	144.73207163788854	128.7289980150544	125.42859712295443	129.6616691240951
Psma2	122.00397202244889	122.43129447559957	125.7813835251387	111.89493863184667	103.84552381021777	110.07512244188159
Itgb3bp	2.195055266054392	1.988815589021652	2.6624322649537215	1.6540381401988151	1.6344486455248488	2.6004974852090865
Cdc45	0.9487788451559008	1.3720676509874294	1.0162676671390563	0.9384678773284141	0.9485855220136726	1.0502840907341684
Anapc11	13.865875965250021	14.509526459919002	12.31868447631793	12.203874074632324	12.379913407791875	11.338874164644032
Psma1	71.11533425057743	73.9726882292159	73.86614359833612	64.21749273612753	65.14986288130991	64.1229016768907
Taok1	12.753516529861734	11.682977745499954	14.295660454789841	10.944787842451081	10.852680742421834	12.863804297071994
Psmc5	86.82626653934504	87.74065385792002	89.14229791610191	81.30395968124336	77.92947064305967	77.54062450339305
Psmd4	76.28134352195946	77.47973005554066	77.21879488510687	68.53429039251834	72.21090517214449	66.81778795809018
Brcc3	9.56253699587313	10.224718839858069	11.057995405425482	9.141588155706485	8.27901662186504	10.337088918600125
Hus1	2.5336069754332566	1.9715209704250696	2.745219045537169	1.9840642935767183	2.4595342803543567	2.0872405285087763
Psmb8	41.29516388672146	44.11811636850545	42.61706101588948	41.511581211513295	38.729503512126506	35.43990141927219
Psma4	75.28921113337431	71.1132656874497	78.76527236352955	69.19333747602481	62.32616570938281	72.15530040259094
Psmb3	93.50597896677772	100.42875045422119	90.2652371249862	87.97867978903079	84.3533058353929	84.89804733578771
Psmc1	101.69795330021292	93.1121450827245	102.55015489877107	88.86732837590054	89.51852477094104	90.9368193641725
Psmb1	83.9361638895772	87.28144629382798	87.03594333098657	78.7888328247218	76.12153908736991	79.9593063244384
Psmd1	48.31636708303323	49.945768094016465	53.37368355631545	46.18245287785807	44.98599354859481	47.17488673117455
Mcm8	0.3472711149489852	0.39405257493855117	0.4247993074098289	0.4586192600472462	0.2733717102112956	0.3287294870665685
Anapc10	6.757854796183895	6.326521891684669	6.325261261580237	5.688348750557935	6.013748363326188	6.191614508068234
Psmb2	96.17781886637955	97.86702191112352	93.51747261096236	93.37734215421257	89.59481342394699	82.20859942019261
Pias4	8.564671643531947	8.298604190564374	7.732015793181686	6.830445596315099	8.14991274362485	7.803250397531525
Hist3h2ba	1e-08	0.22389960514620738	0.0381828039910206	1e-08	0.1486910723371491	1e-08
Mis12	12.309927777033904	10.79058778933296	13.153608743609277	9.530921747429725	11.63181108680327	12.63022026986997
Wrn	2.6242575759775306	2.684853124185458	3.120998389815376	2.3217435614138333	2.3952050609658766	3.1437430500925765
Psmb5	86.18093787118544	85.15280026261219	79.39332221978	80.59133199580019	81.03139338295976	72.86031526531877
Sec13	93.8393492153454	97.50704347861755	94.8234023619864	89.58277376615948	91.35922004215219	86.80733341893804
Tp53bp1	10.000272556155048	9.59216866778522	10.351618339844077	9.024680806988984	9.276082601828008	9.78703535227793
Rnf8	3.2126634382988564	3.8164703818103534	4.1681361100245775	3.264730651493997	4.017860175306459	3.2802657201066965
Psmd2	114.74578023717083	120.14412087456955	114.77059872682752	113.37642076186229	109.95619373137028	106.54673384458863
Ahctf1	7.854619690121262	7.463539642053014	7.928653359008338	7.617576645601221	6.474734716158914	7.982026235785165
Ywhaz	370.7916854944618	355.81138253946335	382.24252635746865	347.76989943784014	339.3318495094366	367.4872596998657
Ubb	681.1635601195136	725.2742506757249	658.0120537394453	660.2172587608743	680.0600604145363	623.6212910225618
Kat5	10.59315759892444	11.800546234044052	11.053497189479407	9.96433308672385	11.136374572700255	10.764257785598897
Orc3	3.983371613012445	4.17116953226941	4.4414864974661485	3.5355160995804087	3.9988539002346988	4.498769260493808
LOC100360846	3.7647378583573787	4.819930625176723	3.992418511404212	5.175607396096946	3.3642130626700166	3.429851863634672
Cenpk	2.537948167706424	3.0875200455408986	4.136694228249802	2.735349514887393	2.26189055191317	4.190210801443421
Zfp385a	14.720855129526564	16.143833479769462	15.169057202183815	16.036746580265323	14.566778386280477	13.723807209496742
Ppp2ca	54.710468318585704	50.82520810818908	53.69773595937208	51.657596876362526	51.34798020376218	50.89706697366602
Rmi1	9.364468824174903	9.47448814145004	11.201625994523646	9.84655854126285	8.997765742744068	10.310261370473004
Pafah1b1	35.414546179323146	33.08710465156583	38.61588019331432	33.89511237001689	33.663644570472826	36.49690871549904
Psmb6	78.85799024416103	88.07186211581532	84.3139409622827	73.65877618354003	84.5255452108846	87.01456510539968
Abraxas1	2.2417249449297127	2.272117203347608	2.6807032686003565	2.195805037119237	2.5405055869143087	2.3192927489079285
Cdkn1b	16.870731492951506	15.065644018400432	17.369830281440194	13.93586550106619	16.25657971914844	18.1754259984119
Rfc3	6.7865133513944995	5.831085922961267	5.947496314963551	5.994765250916537	6.269611339255384	6.015940758397975
Uimc1	7.292479261765457	8.195895059611752	8.826044280226293	7.477765249036857	7.96716494376324	8.545375352274922
Dynll2	79.52982421233892	79.26045669175741	83.77086815235701	79.2116931744772	76.78512667992051	84.59816924315099
Psmd12	46.07488613634612	41.60204514627714	45.41961437347346	42.847626353621564	43.16792791181916	46.28698536196597
Rad9b	1.5743497191220142	1.2755131291573836	1.279529808635267	1.0442507329175836	1.5695607185535771	1.49858525028411
Ywhag	146.83701342174285	152.3009750433787	149.03209666789675	151.35178318241594	149.39583533931827	146.372039482617
Psmc4	60.98986174996781	62.73628600408321	61.551907838910296	64.88921899723928	59.99005147216097	60.33196103527587
Cdc27	12.139019956025617	12.493954389283497	12.97146284303103	11.667435964207245	12.773536856312305	13.28499157400128
Anapc7	2.859924038899433	2.697260713567272	3.0882043280144216	2.9471978317830607	2.825580135168765	2.9083792970928948
Rps27a	393.3709722434199	253.77715937193662	426.5546558364713	377.575624570344	381.82801756671904	322.3118832732185
Rad1	3.861318871292591	3.833798034647883	3.680854266936109	3.508647308617112	4.508800111473467	3.516186643094049
Cdc26	5.609941895567526	5.700249488090143	5.3826233208644245	5.605943215207104	5.3375816675373935	5.995819030704273
Rbbp8	5.444594473932325	4.471678414983599	5.426439637947158	5.026396378319134	5.180841056019267	5.5022590707123324
Ppp1cc	54.29540383265789	53.33429767653279	53.984843775241394	54.90887463354971	55.84038066153933	55.20076833211272
Phf20	7.341730120074935	6.840418310434566	7.242413837974245	7.123620263852093	7.374060133273012	7.5562523410452895
Ywhah	78.37532804028417	80.61778992208359	80.99188502331855	84.24179094736101	82.76415999845175	80.81245837758595
Anapc5	121.41261327833163	129.95105030942915	119.9412916963214	132.95532084224553	128.9233609922656	122.27907051783244
Orc2	3.0768308087541647	3.8728038903612494	4.527777713145743	4.285666836835811	3.7464576868178217	4.068038444820744
Rpa3	13.877972438659933	11.363471503165695	16.083189617853083	14.72514786237283	14.742686563363145	14.166517501365893
Ppp2cb	43.43996606480869	46.94470584458503	48.58109693277989	49.63599735567725	48.80403946205264	49.12318033229883
Nup98	15.128811201607	13.547122577312713	13.960238001684058	15.573981413996218	14.860176503630221	14.91229842803894
Rnf168	3.2353123011302607	2.8521984562769123	3.814151539481416	2.832701231268265	3.769519374114754	3.9864640502203246
Herc2	7.185800540027446	7.0308184951111246	7.517723134366218	7.688348704824885	7.569714086875683	8.097814322069832
Orc4	5.1655790522476295	4.552762880257753	6.269116273278187	5.624752695462612	5.376233655101888	6.214349947055231
Dync1li1	13.636983461435612	14.554531821134608	13.717655960838337	15.221695195860905	14.277082519617338	15.932221163794285
Nde1	8.999716024625345	9.075705724192606	9.505668159216198	10.123870204029775	10.362755622006821	9.610581371253414
Zwint	39.50296674788768	42.21045768200805	42.538671942384376	42.946217164276106	44.67574619008099	48.26626426589426
Mapre1	55.24624721128172	51.79591099635824	57.08185864641279	56.04696819465747	58.40791506339156	65.43662446316438
Rps27	531.4138037264777	600.8962502080001	631.6057518769775	646.9052661694365	683.4478472525392	603.0892904439693
Dync1h1	51.434612218474726	48.66976775606154	46.15054425017822	53.143725799353966	53.34528217967653	53.990724817867324
Brip1	0.5453448320763438	0.4396453764534289	0.4782620536316231	0.5184152430981283	0.6269611429255384	0.4652954272589059
Ndel1	7.304037333064804	6.9636645393764125	7.023745691134738	7.61945513134231	8.00245792314817	8.032190032981264
Mdm4	3.815818957160457	3.390872612105558	4.456343490161847	4.141085568492386	4.424788837399234	4.845110324050472
Hist1h4m	0.0584647498152965	0.2321921827442151	1e-08	0.1182289385808525	1e-08	1.0021926084406811
Tp53	39.50341128406762	35.939405464852236	37.07621340535638	44.760803150360324	46.297627485826496	42.42578257351217
Ube2d1	2.390910160669754	2.215951041051576	2.569706182409775	2.7961846215446604	2.8721700537801005	2.9799437913299616
Dsn1	1.837910597255585	1.4722468534959914	1.653098528355478	1.953027733899672	1.8602310576804015	2.215236596659544
Ube2s	61.29361916635946	58.674447712713395	58.869168467042	76.0163372391605	73.739709207818	69.51172044540539
Nup43	4.725553784630555	4.942329141494407	5.279150937721587	6.4954536821390985	6.520018609925844	5.375438544041061
Anapc15	10.627807584701964	10.33449160601582	10.277551751963525	14.500215829187393	11.306063216527937	12.766475814119609
LOC100910200	0.8546278945611818	1.3975898395750526	0.9193054958984597	0.9149563681257065	1.6905321518586702	1.824899233837284
Hist2h4	0.2391739456080312	0.23746927757931088	1e-08	0.1209159596849628	1.005354351938679	0.4220463582738162
Psma8	0.0128686076223886	1e-08	1e-08	1e-08	0.025455273389240203	0.0648798057750121
Ppp2r5b	5.384117789095869	5.330976237397608	5.084523510079414	6.23347545384082	7.546398319790081	7.123736380271432
Hist1h2bq	105.81594250784234	107.93541232344856	110.0859439624676	146.47368258791056	148.63191495406986	160.8909548941755
Hist1h2ao	0.908371606874492	2.284806620315518	1.66109802991627	3.3064791251703913	3.713473727959748	2.6257235096004905
Dync1i1	1.0239659274154096	1.1270038387362735	1.1531639089778924	2.8331543470032834	2.323827474350618	2.545254190615159
