# Supplementary material for: Peptide-based Self-adaptive Implant Coating Sequentially Regulates Bone Regeneration to Enhance Interfacial Osseointegration
Source: Research Square preprint supplement (doi:10.21203/rs.3.rs-5132912/v1), 2024-10-01
Supplement: Supplementary file 449 [file 8_Drug ADME(R-RNO-9748784).heatmap-data.xls]

id	S1	S2	S3	C1	C2	C3
Sult1a1	56.96358574766197	55.940946808763286	55.76065008062465	2.217519238074885	0.8830055400267588	1.3699209437412396
Ugt1a6	11.95986777662241	13.255842625938866	13.661682188035696	1.7875432661750081	1.681646786003988	1.7729046211086135
Gsta5	2.0317116515686466	1.2452043262262593	2.064055070764603	1e-08	0.0248081056759544	1e-08
Slc28a2	2.374505766500771	1.7323861213080496	1.965582853245976	0.2809935154185394	0.3688006764267873	0.2766765302683031
Gstp1	500.321704418056	516.810635737434	494.17870100634735	106.72428525443492	104.0905111195828	101.34004741539319
Xdh	75.05995622186845	75.15189912082451	71.81610808801123	18.149829531854888	17.12363447640194	16.673242460234448
Cyp2d4	2.4153582788750283	2.71704528696415	1.8534089901609923	0.6625118167925964	0.4320350826073976	0.41455479841375087
Slc29a2	7.777030137812879	7.469737419536639	7.446452199272241	2.227417025059338	2.2448284250421024	2.1943894488318727
Gsta2	0.5231234668357057	0.6287413149745243	0.8671046223774811	0.1113551636633611	0.1633872819867511	0.1110500790474626
Adh1	0.3277715994960561	0.3905225596736176	0.3729482303774112	0.0132565759123048	0.0389017414254169	0.1850834584124377
Adk	26.75211247087196	29.16595459295472	26.53228994870924	15.072890136175312	15.06395031515232	14.495583937493587
Akr1c14	64.03858881058163	64.7195562026617	65.30742201740642	38.30617287019624	37.298173498915055	39.50072543424756
Gstm2	190.81332753780092	209.34083083854833	197.98897462861916	134.8681416964187	122.22953430163864	122.6735895171186
Slco2b1	0.0364360481130722	0.031008307415280403	0.03172807359333	0.005263003633243	1e-08	0.0262428818896509
Pnp	190.69859208714198	211.5158701256981	202.07751674433374	131.18383296872616	136.68464228781187	125.60269813528767
Hsd11b2	0.1779361746552503	0.1766679675227723	0.0387361778169774	0.0257019509958375	0.0377115113173929	0.0512630585135898
Akr1c1	0.0763198153995007	0.151551710179544	0.0969184637241862	0.0771679649963663	1e-08	0.0384782772767195
Nme1	136.81534465030637	143.70009688883675	143.6607677776486	103.26943990362604	92.62676440248899	100.99092175822305
Abcc2	0.2109105173503125	0.1582188450498734	0.199983527221379	0.13743060839490429	0.1529734455695433	0.0708900481389681
Vav2	7.002991937029107	7.013019745785142	6.812197083994428	4.983604496797065	5.011316659748437	4.826461306335268
Abcc3	4.7216918130703815	5.121846462774731	5.009471271879777	3.794087142028275	3.8311178027735378	3.0173280219152794
Ggt7	4.986469350669059	5.935150077339047	4.898005990846248	3.910497754806744	3.854861780724521	3.6347501291557696
Nat1	5.94566764578024	5.552284507212363	5.958692563943132	4.232591641354393	4.362722925723599	4.601776200049588
Nt5c2	9.755178805493777	9.26001163062136	10.181463918866974	7.556626596407147	7.3445936881169676	7.71363475982868
Rac1	314.18486117310005	300.69546008230236	316.63515813440154	242.0435022918744	248.6773534130673	238.12457893963392
Itpa	43.156755036326864	43.02786688634485	47.84620128092722	36.09402374070644	32.31958476319005	37.58819736765297
Acsm4	0.023033297573146903	1e-08	1e-08	1e-08	1e-08	1e-08
Ugt1a1	1e-08	0.0208140493894216	1e-08	1e-08	1e-08	1e-08
Slc22a7	1e-08	0.0077359288846172	1e-08	1e-08	1e-08	1e-08
Hprt1	48.07051853626996	47.905152250449504	54.65583010633114	38.59497883418675	40.33690936256189	41.43484345623558
Ggt1	0.4875061673784635	0.6514069521994721	0.6850420942260473	0.5159576971683157	0.5497592485623093	0.39969051250775217
Gmps	6.495387105627447	5.81638005706174	6.510389242243291	5.121049248700305	4.685287205288039	5.4889485428307285
Akr1c3	0.078469669072726	0.13634317688687858	0.1793674018219446	0.09917713525941439	0.1164151333708417	0.0395621721295848
Nat2	0.8755713129800793	0.8380599471394355	0.7295260180965961	0.5445560387887035	0.5202110590985456	0.8701728708121872
Ggt5	10.996731958587185	11.303296778954488	9.445893526736663	9.265783114766133	9.084475014610181	8.472733470995452
Hsd11b1	10.368639398327065	10.318870901885056	10.721361706846377	9.387804126579606	8.274240952199099	9.264051653899905
Gsta6	0.4437573084919873	0.523725548151401	0.5699065638758779	0.465620481028729	0.4223341536432639	0.43057426993826997
Tpmt	5.401053756622969	5.512710388668253	5.113916369436064	4.336094508602277	4.7222300759674445	4.825257230084661
Nme2	751.8552252906267	726.1572733407747	746.4024636911072	635.3528576296372	660.8016674190831	641.5707417216685
Slc29a1	61.85914451736786	62.79734660517361	60.71064245572287	55.40053382652778	55.22580001065639	53.68339674269575
Ada	5.456055091420794	5.640691991745476	5.2065699221648485	4.311586860175891	4.990256678454406	5.234507738926258
Nudt15	1.2734194598351218	1.0444575914107959	1.1061998951490557	0.9236923115294786	1.2047105267534415	1.1909968534084845
Cndp2	50.899102133560426	49.10605474987404	46.96122310532852	48.4653358842681	47.629218298233354	46.98759130292829
Gstt1	2.353354628552995	2.6142899875421732	2.1066637354923627	2.5550451447686897	2.2035652138620483	2.129854389266712
Bche	0.08825748464130219	0.0125183579714333	0.0640446325089004	0.025496663927180602	0.0872906895669366	0.0381402094332339
Slc28a3	0.0093368473916384	0.0092703008084983	0.0189709565412799	1e-08	0.036938247094796504	1e-08
Abcc4	6.100276530260542	5.716240374865907	6.006296244204341	6.7125303009222375	6.7119423566208445	6.363151668901065
Slc22a2	0.0110182601745905	0.0109397296325508	1e-08	0.0445627983436438	1e-08	0.0111101844277359
Acy1	8.863504682532923	9.177488762918072	9.576326417373632	10.341870059525649	10.839737482252334	11.1789083273031
Abcc5	3.6787195215331487	3.2287164604725724	4.542235222269134	4.198857843308782	4.767265590937997	4.86503485446652
Slco1a4	1e-08	1e-08	1e-08	0.0062887827968538	1e-08	1e-08
Slc29a3	6.622427374433348	6.68308858635436	5.924394395694318	8.567746050257693	8.38935222232027	7.440089697494434
Abcc1	14.596121718933738	14.119964157997781	14.898542318262848	18.5994974850937	18.534603592136406	18.817621941942836
Acsm5	1e-08	1e-08	1e-08	0.0262299284197454	0.0064143738230897996	1e-08
Serpina6	1e-08	0.016091356673752003	0.016464869831856903	0.0819348424353957	0.016029333968583803	0.13073657314964798
Abcg2	0.1852053306047494	0.3454814900667955	0.2508715552550588	0.4880201074722796	0.3330482534430101	0.4640466365244764
Pon3	0.6196779340753538	0.2104841335362073	0.7455111736676557	1.1047320957580697	1.0644928426409541	1.019488591544543
