# Supplementary material for: Peptide-based Self-adaptive Implant Coating Sequentially Regulates Bone Regeneration to Enhance Interfacial Osseointegration
Source: Research Square preprint supplement (doi:10.21203/rs.3.rs-5132912/v1), 2024-10-01
Supplement: Supplementary file 453 [file 9_Cell Cycle, Mitotic(R-RNO-69278).heatmap-data.xls]

id	S1	S2	S3	C1	C2	C3
Cdkn1c	3.916359529756604	4.346567958548879	4.115901947815346	0.8648019163019588	0.8570584028202359	1.1120841140066717
Ccnd1	235.5723156204571	230.54435733474	240.2908752556232	78.22491203950719	78.42743659374106	79.86520360317166
Clip1	14.929776150279931	15.036566615557177	15.255687515000101	5.7206526081480655	5.750907895329468	6.094231815302344
Sgo2	2.199520901654152	1.4808653470148054	1.8630957520912732	0.7100255792530247	0.780628087270033	0.7783031287284788
Prkar2b	13.44078490322951	12.355656284542738	11.802625377012447	5.522632475037644	5.0662956985168615	5.254454492766318
Nuf2	7.508051723087072	5.913583434743948	5.713942828420977	2.669092586743365	2.7945173286305387	2.608276841829059
Spdl1	3.8093103928158176	4.1575607557987375	3.9179662245516793	1.089546842849893	1.8136748242561247	1.7346863181146555
Cep72	0.7550452786605579	0.9745629799444296	0.8130889713266456	0.3893524525761336	0.3061774765312948	0.40351261739663147
Orc1	0.7782891359688053	1.0303226953929707	1.0756082991222375	0.4820883566266923	0.2149790185463816	0.24038378398192228
Esco2	0.9831567316461932	0.938363033322372	0.9730322072584509	0.3655658841346078	0.3764078693854968	0.5308568227918485
Ska1	2.1255695605125626	2.9638986110938546	2.4610890088271735	0.9955812353268825	0.6956091877653761	1.3080452127405744
Cenpi	1.9291406714277248	1.9875462208193608	2.335713111169468	0.9819697732618664	0.78411303404356	1.105852957629448
Ccnb1	6.127544165985409	6.593853348265486	6.1074971496636286	2.7430520308091944	2.7189612323887493	3.2315807696778416
Cenpu	1.8542297631227975	1.5487896271393962	1.6744424860760836	0.8332604513342873	0.7131903602715653	0.8012997624182977
Gtse1	21.075474580034466	19.75901942105583	18.28604257122436	9.37318693622129	8.9345975967416	9.475321390395205
Cenpm	8.366304277568934	8.437283087092917	7.323459897477765	4.415850492494844	2.2117795622650935	2.838563163818753
Cenpt	2.8422815718145333	2.7109204389441555	2.523745552336556	1.221959682997753	1.5273158133544122	0.9478092004523513
Cdc20	16.60411794333861	16.631549700186856	16.25825091022395	7.5171005888927915	8.026299970205978	8.277111272570885
Kif20a	13.626527634085226	15.002269356804423	13.744629382728007	6.909471021884934	6.542203136179532	6.996800663028081
Ccne2	1.8764803973981519	1.5811887567442018	2.351586318753554	1.1359038585003443	0.7997571381728963	0.921171333537607
Tpx2	10.04013397719984	9.742658069064701	9.24642796025798	4.932063557690431	4.655637732096954	5.234026537627406
Ccna2	8.507977483441698	9.338513823572733	10.056161487752584	4.665560973017762	4.663763055729668	5.098935374699298
Pkmyt1	1.4606104926269765	1.1979915219604544	1.649760040025824	0.5687219250699633	0.816519033351414	0.8415978512869007
Cenpa	0.6747355560477758	0.9304534726788303	0.9139691579855924	0.450611322229661	0.3872244916009663	0.4829750244588414
Aurkb	5.8815742707038225	6.626176158747178	6.2287651434114615	3.5659676370519526	3.123227835191288	3.1841647991633817
Mcm10	0.8072120426771056	0.6118663889644341	0.6319476451519734	0.36859863081383837	0.33193863523212547	0.3850929913742655
Ndc80	1.9752373866805144	2.005175290017522	2.2618956656860925	1.006064982664817	1.0620569322687778	1.2417185894260694
Kif18a	0.7462523464179286	0.5405171158231228	0.739489564509641	0.3525335693243324	0.24804251453168188	0.419414117329864
Plk1	8.508179246048215	9.04787147459503	7.48090254815866	4.858141517862324	4.5278564362995075	4.082723136744948
Cdt1	1.818961053114585	2.2574959280105547	1.3537071055816083	1.0479022376404732	0.606651575185287	0.6504786413342887
Cdca8	11.910258319067484	12.786093176327137	11.10238164738909	6.201157049792885	6.276925294779472	6.930285118313554
Birc5	3.892487234021695	3.99314106925691	4.716440488945464	2.4059038215360826	2.4685071467523163	1.9820405651453183
Lmnb1	7.428461068884735	7.918801867744541	8.035232098404498	4.468047570942882	3.8375413982602478	4.439086541093687
Mcm3	6.460632922740817	6.84757050684871	7.2198298151234175	4.205252189186788	3.5703351110201718	3.6562818706742166
Rpa1	24.73219407314975	26.08167812960536	25.38747117063521	15.179943638339742	13.050255328275787	14.335194193308284
Tubb4b	197.2372854152425	216.9522282971692	191.96172547609814	113.40967416120797	116.00986648995624	109.95135181482904
Espl1	1.3304618647321282	1.5891479603406355	1.473594530946235	0.8395153108545331	0.5408661049399469	0.9246353194537709
Ccnd3	102.36404431039183	110.64661880553419	97.42762331666175	59.48700703574378	61.07934891591518	53.58569802936757
Mad2l1	3.0640968639936017	3.187415522584354	3.1933271699179318	1.687659413732597	1.596602329088439	2.076153474800388
Ercc6l	0.6274728300676701	0.5701043541410307	0.8238892473412486	0.18554553479157548	0.2927355389762624	0.4476706008475837
Pole	1.7805606873116353	1.629654774507568	1.8089059599437602	0.9296343663966137	1.027816305339133	1.0250191734391854
Bub1b	2.5936890606831686	2.500092933437683	2.6349787646519056	1.3604286159717114	1.5017559870393378	1.5746453866006593
Pold2	9.229697308181544	9.22213489477395	8.733250350323644	4.861791389606382	5.683621969321193	5.073156581863652
Nup155	5.745736649141773	5.124918156827919	6.091487609497715	3.0088387579746567	3.3117554893274126	3.4661082257238327
Pcna	38.619992709025105	37.71646586305575	35.41914970491197	22.93004206155065	20.652996295704575	21.529353482486098
Cdk6	19.141701453881698	17.061484729892268	19.08589690279556	10.631079311801965	10.246962239943441	11.540284350250786
Wee1	3.3626699744502164	3.1309000646962297	4.214732461619324	2.0268562885730437	2.014820857638624	2.26986254880946
Haus8	2.93998907521047	3.8396535256161934	2.9063780110643673	1.8636300769209608	1.767037778032453	2.097965975385684
Haus5	2.5544663621462402	2.4563204525777125	2.2902594678107113	1.3839363169661316	1.382689000033165	1.5572755532266283
Cdc25b	5.801015644082527	6.237803499304852	6.066476584706032	3.850393636826672	3.5465330769464583	3.3318495472218994
Cenpe	1.8181163326766647	1.899050492665623	2.500968097216545	0.9530893727448336	1.3848555400191132	1.3626596114462222
Kntc1	2.105546315453509	1.871877614572824	2.0034667076714667	1.3495692342177366	1.1055964272158727	1.1238029212596234
Gmnn	3.547231391112877	3.7543620426797513	3.932972972801332	2.294000856190459	2.012417638855826	2.432967682439086
Cdk1	15.272179921277324	17.267849429080112	15.51530227525721	9.598524579023922	9.299448489796799	10.028917301520467
Pttg1	4.751221711108227	3.72748636208867	4.0039181246242	2.031865264508764	2.619212637682348	2.9373473955613383
Sgo1	0.8864263212157493	0.9364354236618109	1.0446236191883014	0.5807876712900373	0.3857551245539247	0.6793044904715256
Ube2c	14.120039236033772	12.324748366671969	11.34974794861532	8.001371306977425	7.397039326726524	7.948157638678813
Tubb1	0.0078301090824057	1e-08	0.007954758748129299	1e-08	1e-08	1e-08
Cdkn2b	31.976685193230146	31.661724179646054	32.56432602440686	19.43051624789632	20.439839079621144	20.39139054758368
Cenph	1.8894912956913408	1.385891824672067	1.6774626561475725	0.8950040487896317	0.9764866055786181	1.2530056417037567
Cdkn1a	225.2471563782602	244.81389495302528	229.08205393192696	155.36096672887274	156.42312077928767	141.03910800197
Pold1	2.8086191418188577	2.846697086673568	2.582528193363021	1.965531600677972	1.575402637110034	1.8290330665107208
Orc5	8.082289937182736	7.274973863313582	9.195889997451605	5.504627212351034	5.467469889777122	5.141749368396393
Mcm2	12.154725901724852	12.346643413552636	11.60718484091374	8.134104769820254	7.914958269761027	7.673342680926198
Cdc6	1.1190998154750487	1.6626886050333796	1.1123773609522782	0.8466172272433714	0.6449936270575248	0.9254801842105776
Cdca5	1.5897578156941832	1.2824720293251934	1.1336518470865338	0.6723364042134184	1.0734266107651196	0.8015105148099626
Bub1	3.1825564112359	2.836302300771473	3.579821702112984	2.074917706593962	2.3569931723379063	1.8946574783613863
Psmd5	24.84937545407105	25.12127143210949	27.330054709939184	16.941852294213874	16.984968410150618	17.070821104024734
Bora	1.2026456724333396	1.3620844536727548	1.3998408800536521	0.6721667747112025	0.6037016624063809	1.084708060649922
Spc25	2.908607516279652	2.256822362349511	2.714140015985928	1.6120659743167205	1.8112844477057184	1.7923117476973323
Tuba4a	17.331578744121035	19.700186274587402	16.52156107619932	12.689595261702452	11.468719645829385	11.519262613671804
Cenpn	2.6132840048973693	2.9560571402413154	2.6738491154177106	1.8590648635323852	1.7354128424016502	1.9104376385283823
Blzf1	6.14000730591266	6.982579108283793	7.100419714647457	4.8543167431455565	3.930058605911201	4.841017157924215
Nup85	9.01484025284536	9.879637085463495	8.555522052498869	6.195908090098006	6.286407321413134	6.029349782957658
Mcph1	1.7646649951673778	1.6357381003039517	1.6386921468722757	1.163961230460839	0.9851594612272473	1.2719839886528141
Tuba1c	127.3012615105606	139.6486264045115	118.80367539151443	92.80393604906591	90.12290166513995	80.8605004818448
Mcm4	12.913458511791037	13.159381875668604	12.434623109717299	8.812197981919208	8.248145732098463	9.367251267028404
Cenpp	1.293891792797546	1.7128930876212587	0.8982345899526994	0.9157896617123417	0.7038449977024889	0.717577641959697
Tuba1b	280.13380083499334	290.42887208062353	258.35539048491006	190.6441473466248	190.4732508638881	189.0459479540973
Fen1	5.149512131468123	4.582592609810819	4.572708677406326	2.8637065493370626	3.4425603990885465	3.5481905971447634
Ppp2r1b	7.935970854646763	8.369955532777825	7.855258379420309	5.60130365104004	5.650085858785452	5.461409965462785
Vrk1	4.767116158153039	5.036427963366995	5.849221922948147	3.9496689278564334	3.4423317971798175	3.593498628218811
H2aj	51.16448282897826	51.236075406498614	44.73763818182971	34.40644650942884	38.001296719990684	31.2600220238244
Cdc7	1.982097286664931	1.54322847519021	1.9846774862812366	1.3120527540070224	1.3045726775244455	1.3084580653529696
Cep78	1.9348452122717308	1.4642568779111833	1.6775224950034264	1.2426310500150162	0.9848754654857484	1.4171667814880478
Nsl1	1.0600005798219476	0.711308078556491	1.017461247840381	0.5248028567648064	0.7953296348814787	0.6707917978708263
H2ac4	0.2349029824721735	0.0466457589887932	0.3340994574214309	0.047502704519092505	1e-08	0.0947451085920812
Nme7	2.9935660283838406	2.944190034775696	3.0986030296018616	2.1824206183026265	2.2106046520562197	2.1113515101978386
Rfc2	9.390707531510621	10.339237859159946	9.020685090378633	6.753092493125236	7.28007206569239	6.797092750617763
Cdc25c	2.4377000290796165	2.3724774874015107	2.5703444698093803	1.7257593665111304	1.906554337118127	1.721031227641095
Ankle2	6.676234997078514	6.186542127219635	6.813081600568056	4.359334961450223	4.689719894793795	5.281792461779031
Rfc4	7.7547968629324355	6.716987864386223	6.946018916877165	5.657874135912343	5.534392077575538	4.426813552727879
Cenpq	1.0007270571966407	1.7345803262652097	1.499139650865217	0.4458992284657513	0.972989160752047	1.1116939318755659
Skp1	203.8080830061237	204.7934963703977	216.4827352950905	152.92457186284895	145.90405807616312	157.5800479883495
Pole2	0.6641977918360737	0.8221886872582043	0.7448774665461411	0.3052632272374472	0.5886703633511725	0.6001558476390193
Haus3	3.7128569334773367	2.87492380566432	3.7482399645031537	2.479134718037848	2.27490727660054	2.8019881920308984
Plk4	1.3875592302690734	1.5023725144352107	1.3367353591173188	1.0099032159315438	0.8044866367395138	1.248366598269089
Psmd8	91.22345667127793	94.13063046150059	86.18710693586323	68.68964632715287	63.585238330265	66.91497253669147
Ppp2r2a	43.446361409448336	44.13310793371114	44.17646976788785	30.402940084965827	32.651540659027646	34.061866850339676
Smc2	5.112103624616191	5.3850580301979525	6.541052823041168	4.0108055002081695	3.9191055802175057	4.65796089123587
Psmb9	21.08841436368938	23.58292455500913	21.87516132991819	16.958461953316043	16.97866069062322	15.29541186395911
Nup133	5.854137064597192	6.332025568953652	6.41100004656482	4.424013484441193	4.7668268195440735	4.730972689427562
Tubb2a	52.89563599117507	50.50940212900907	41.3574682263003	36.80069009403132	38.32041385926944	33.5869305938653
Gins1	2.584756928149952	3.18500448481374	2.08665620793034	2.2167924208909855	2.122760570997458	1.5125971980490156
Rfc5	5.500700999948267	5.32900665465081	5.422578392694733	4.287556928447136	3.871367807106238	4.09640550003508
Pola1	1.981167705745452	1.6946869052221216	1.897694701422059	1.3207810712884873	1.274729198333559	1.6420625425683097
Psmc6	36.34676219004507	33.87018123191189	38.045754384230975	26.668142857387103	25.98529080131754	29.70687141622505
Psmb10	19.127450698220663	20.75609761409436	18.468776671062162	14.522985966756082	16.29238780887907	13.90960475465365
Setsip	5.892275861431037	4.79784847741873	5.811878745130935	4.2397796756487764	4.023909058732297	4.41678073514974
Cdc16	24.857475658468246	24.34137801442713	26.335618837935172	18.47113950080017	19.684514042340023	20.03728453059317
Gins3	1.0352814741319067	1.3230430722275892	1.2496187224334039	0.798045277920755	0.892146384022895	1.0955978773557022
Stag2	8.359664523535637	7.521750452639007	9.680814826247142	6.474236993579639	6.2566757934926525	7.029906348411625
Haus4	7.362428279923339	8.243875490922768	7.408847785677988	5.68299034359949	6.213631051732534	5.936739969057706
Mcm7	8.000859609380992	9.017326170682873	7.7254776435256876	6.413514491920223	7.0488220319246135	5.805408585375058
Tfdp2	1.6567372335155555	1.53092415554421	1.944187996380339	1.3849001805171395	1.176214812952769	1.4445099717696732
Fkbpl	5.696175485872406	6.080669439501363	7.2052013006168965	4.6866337767987725	5.155091086311539	4.992887941465713
Optn	19.09898395739391	18.325527870463212	19.76123605473425	14.160047203691288	13.810768226993885	16.78778961001681
Haus1	6.829677081053731	6.362788377782628	7.396885361805606	4.639208524278848	5.579457360246424	5.900681410752563
Psmd10	11.417759787396937	10.10594963599909	12.472424322112259	8.437115019769323	9.249870737177364	9.080454888322706
Mad1l1	5.60935989937482	6.193903657385257	5.541090408718754	4.966002223043999	5.019540812533292	3.6751996204517785
Hist1h2an	0.19504300526519838	0.5034974521327399	0.3962958949150416	0.3549789594869915	0.1157438764815535	0.078668098452074
Psmc3	138.3223079604702	145.37802076591848	134.58005642524108	108.13683384883	112.43324906975691	109.3664067202914
Cdc25a	3.713246637315364	3.3442592609454045	3.4537475162712363	2.67635844493424	2.890908757082136	2.7385976730393464
Lcmt1	15.785479760130062	15.428081488043352	15.893588008762357	12.362576258593839	12.598082596299864	12.328705964294565
Cc2d1b	24.68099541413268	24.50508618022949	25.03085416682756	18.993144173458468	19.94058898052739	19.824076755913875
Clasp2	5.6021295082798535	5.008536605770597	5.865624221685817	4.3068421352462485	4.282848075239665	4.455079319884166
Tubb4a	1e-08	0.0338915873527416	1e-08	1e-08	1e-08	1e-08
Tuba3b	1e-08	1e-08	0.016144412828418102	1e-08	1e-08	1e-08
Psma6	79.50491631248433	74.77579027515682	80.48808802619382	61.767406112484444	65.01002931761006	59.70019611797286
Ywhae	349.48916020861515	333.63829035462817	347.00750044747537	267.9780181024126	267.852307692353	283.6948810025157
Cep57	1.8355889942973944	1.7135046082396603	1.9406518447995575	1.3098480480375891	1.4636776548813115	1.6117912569685504
Ndc1	6.2286900667787695	6.179222975742008	7.225891900022764	4.985630244420771	5.255847228563883	5.451134927183063
Gins4	4.916676370053542	6.43395232056543	5.810021330232287	4.638508126759209	5.351134266872771	3.754572935266731
Prim2	2.134711479995952	2.12797470530411	2.16869458395808	1.5195380607109938	1.8410774082495551	1.7995077101975236
Xpo1	26.71475668331078	26.95162229932712	28.96738407860952	21.86842853813684	21.921987591412076	22.530101980530898
Pole3	11.843665078393085	11.804479434743778	12.485729571042224	9.653921989002901	8.947637725226736	10.50019209082674
Lpin3	3.944951410531246	4.288659131622404	4.842160225683714	3.205663514318633	3.5818538584370856	3.746143559580068
Rbl1	2.3566221839699493	2.1961929249441745	1.9627190341895964	1.6325798052340235	1.6107954315642976	2.013958889335339
Psmd3	52.57499424357464	55.44829284086258	50.306145096409786	44.06312442463773	45.489560499600785	38.51341509541822
Orc6	3.6807225610365726	3.262936511089768	4.106571427576951	2.8909065322389593	2.925323824891172	3.1480883657174514
Rpa2	2.416785417131525	2.5117474566096942	2.372354092644646	1.6883354389521803	2.011586677832641	2.240726615302858
Psme2	40.304102812081894	46.686316560088	42.89807053371671	36.4022733628112	35.48573650838833	33.86696354694304
Psmd14	39.7567984788289	41.032421836661726	38.74667385657772	31.149167430302146	29.67732605104177	36.54195310199728
Aaas	11.426743049720601	10.929939610511857	10.066495627208667	8.749895627990307	9.24459097050226	8.484875553172106
Anapc2	48.84798065410327	53.38330505745795	46.54091741007875	40.19850068209382	41.788627903454305	39.658657026968804
Hdac1	71.83571308186053	72.10736589458644	75.25315793427309	60.52041801455754	58.13931501861888	60.92477508017597
Fbxo5	1.663807786495093	1.7998850616997164	1.2740278975976116	1.2805550807066124	1.3999727547632475	1.201926294813649
Nup93	8.90709763636326	11.18132735297219	9.342247973168867	7.8756437422010706	8.589838046001397	7.689817955766291
Uba52	735.200981392038	822.1241918817526	721.6862510941656	625.5423064884333	661.8501580718869	588.9355328583767
Lin9	0.5129453687568469	0.4312531610284655	0.2983781328543597	0.3178796764673866	0.29866798505614467	0.3754051176290011
Ncapd3	1.8214015196303919	1.7945939774474597	2.0597690803412987	1.512174706095432	1.4956988313042623	1.7074176794759248
Skp2	2.541504740968114	2.191157387129018	2.177267203020953	1.788351788045837	1.8596389020160948	2.1047948920469612
Lbr	4.91108391347772	4.428340293859637	5.246572913519636	3.735176661838858	3.940817462432857	4.478652481615447
Zw10	4.424304023012232	4.531061540147384	4.9566947877305445	3.56220899137638	4.136788592488082	3.928348170517205
Cep135	0.9654152110726905	0.7182332939187539	0.8605764401553723	0.7504616588794834	0.7447218554364882	0.6318061666079092
Cep63	3.2750252866921516	2.8143635079449023	3.2261196067030697	2.474586821869488	2.666501858100608	2.682710461403862
Esco1	2.642676628529942	2.259980532288331	2.8419424119352805	1.9721256333914439	2.18683257727925	2.3732058707959034
B9d2	4.230904457135173	4.900874377110951	4.053181394078174	4.015243442642043	3.1567718585214504	3.98553128901924
Mapk3	90.68227442303372	100.31036398697587	85.37399712077665	79.47662132913044	81.85347769599866	72.78668334012438
Cep70	0.5470640676628385	0.3706302177848337	0.4773108813365156	0.3383937631819455	0.2991806539115919	0.5061999713824268
Akt3	4.742749177237127	5.063635765194547	5.086933532029528	4.2546449492524365	3.984150811970837	4.430061904258992
H2ax	23.625834193546428	26.64751930400493	23.274609302933666	20.30424908320505	21.69178905980446	20.68880804327083
Ccna1	0.3155446143597987	0.1904346016385955	0.0942846724549635	0.13137406769272938	0.15910372054889618	0.1434916722523393
Cenpl	1.892880939339724	1.512054507017538	2.0453879061323645	1.4528367804516649	1.5402654386251016	1.657075259067606
Csnk1d	49.900331545414886	54.09338491443539	50.88614593966968	43.333798517291136	45.06714794769347	43.76728741960012
Psmd13	68.67153187738668	71.21205795995517	68.7948964062077	59.59230296418829	60.195557032534545	58.655795072541295
Psmd9	52.990485087607034	60.24770939845778	50.79171021606191	48.164982900265514	45.45715267675337	46.651146111616015
Hist1h4b	11.126570806098622	11.46448853924562	11.13664825738103	9.255108325469864	10.823986544369207	8.769185246355962
Nudc	87.24527450720596	86.99049845205109	87.80790724049803	76.5338494745314	72.2309492674684	75.82093005706616
Ccp110	0.8980844665306008	0.9644094968268047	1.0320909458944754	0.756720808768167	1.0047896131572582	0.7193236583289576
Dynll1	101.90785442587587	109.57451492155263	106.47023087174433	93.25563762224708	89.8401095984251	90.10506038233683
Rab8a	43.74496768911617	45.670895639192565	43.76549505593487	38.616422119995704	37.800482306705455	38.031464883840606
Psmf1	27.10694884066165	25.173438582461092	24.41442560416763	22.82202182768185	22.33914245499374	20.77501617400908
Rcc1	4.808007580088102	4.794464746498423	4.912822915956038	4.171973361839621	4.232320910861625	4.118446664168387
Psmd6	52.17358166723689	51.68612751030013	53.418127763178454	46.17577230382905	43.36875963165845	46.15198552823482
Ppp2r5a	12.997481892088985	11.67322447265926	12.787411834265553	10.365980916890543	10.744160719113362	11.257294374611044
Anapc4	15.862471949789281	15.718424527672587	17.668778379934	13.734878757658027	14.250115504378353	14.672925887714637
Tubgcp2	10.755881752627229	10.820093720125028	10.089972720325953	8.911107000265172	9.639560364950075	8.881190252028121
Dync1li2	48.767305028071846	46.236393496264064	52.56351529242	41.35996269344591	40.74599482193327	46.1081392703404
Ska2	4.462367185529828	4.92857144881005	4.006264822907385	3.4276889620628483	4.276633011844593	3.941506843466916
Ube2e1	25.52651947935589	27.09291383722502	27.924793064730483	23.1205836423244	23.38178719785084	23.58613268672361
Sfi1	2.4278358932285293	2.22093954249867	2.3778027132150132	1.9142053646209807	2.088270050807623	2.1180114075584604
Ubc	153.4559036116401	114.67484802974596	130.04403504003866	121.81857284109205	116.87234083042169	108.482240280207
Psme3	41.17675870861019	41.95229900883179	43.57872166693553	36.264250396372255	37.593640276848404	36.80352900715506
Psmc2	89.19012003458919	83.344403684756	85.92068854577239	74.85358933282703	76.43961392380159	74.43620805681391
Tubb5	465.4475581455156	495.848323879574	436.1868466857782	420.7681179722599	406.34380434027344	393.48656126472457
Sirt2	26.8726881979328	27.54697049286992	25.646181719166165	22.591788823404908	25.161394293145708	22.29660866852428
Phf8	3.197535377914341	2.829258522392648	3.413248341476137	2.8194271406345406	2.432341293361497	3.0084744006826
Ppp2r1a	106.93804625204957	112.42588843419584	103.04062741364869	97.40272612049104	96.45423553572935	88.34465525697485
Psma3	45.59505397623938	48.01657045085328	48.67477002933713	40.92621564695454	40.92159167917298	42.721288679602004
Vrk2	6.040088839730196	6.076822449530973	7.197499870513268	5.375972374782912	6.079891765660834	5.469278721712562
Hsp90ab1	543.414127652897	533.3368799450976	546.0356748326684	478.315155671828	469.59887321667696	475.58522011522535
Psmb7	155.54056822694514	148.24019029638487	151.3346756383	126.40642948436155	135.0679321450557	137.89973647191138
Pcm1	6.560157684840464	5.799254576714115	7.2909252987247966	5.454499807017363	5.491073832619557	6.310532378226673
Psma2	122.00397202244889	122.43129447559957	125.7813835251387	111.89493863184667	103.84552381021777	110.07512244188159
Itgb3bp	2.195055266054392	1.988815589021652	2.6624322649537215	1.6540381401988151	1.6344486455248488	2.6004974852090865
Chmp3	80.58474905137315	70.9009470847059	82.9540865811734	65.27909114110896	68.73485892144696	72.55432503484874
Cdc45	0.9487788451559008	1.3720676509874294	1.0162676671390563	0.9384678773284141	0.9485855220136726	1.0502840907341684
E2f1	1.8111527332213584	2.038009952455324	1.8399850096903843	1.70919490419286	1.8489643498676527	1.4610104137508622
Anapc11	13.865875965250021	14.509526459919002	12.31868447631793	12.203874074632324	12.379913407791875	11.338874164644032
Psma1	71.11533425057743	73.9726882292159	73.86614359833612	64.21749273612753	65.14986288130991	64.1229016768907
Sdccag8	0.500153773521904	0.4923446694838069	0.5124587399679503	0.4783373072552638	0.4383017468315225	0.41380636947637267
Rad21	26.181174535131372	25.41295026313539	26.949624259130438	23.14039611158748	22.83287747954576	23.513298928400694
Pom121	5.098398721828781	5.086673764673915	4.919324346278142	4.703885745537097	4.400993410208474	4.282723140495583
Abl1	27.45046672644505	28.236540349026356	26.769231247581224	23.51127377149769	26.10909383296952	23.53715489049151
Hist2h2aa2	1.0947122186990879	1.0466539393649763	1.2357102949833743	1.02488691229549	0.6817128856981454	1.2264947794454348
Nup35	1.7491718756268004	1.775894280853911	1.886762006106568	1.5627628087358527	1.58002192109139	1.6653126132582512
Sumo1	74.8828952900353	70.21519143100623	85.81667725779388	67.46530112312314	63.60108332150341	74.38382157037056
Pold4	21.305604510808138	23.652227485111002	20.281324360756823	17.665232813063678	18.701889270102924	21.700847004932804
Ccnh	8.186992476910083	7.7796060353457035	8.11097781899326	6.627119572377236	7.007881891398085	7.829927511198692
Dctn1	42.01446564958459	44.92226580171854	41.472583072697354	38.67612763015951	38.48341330270282	37.34738846322711
Nedd1	3.117352816673993	2.7560261044629537	3.2994620588070815	2.6496861080531757	2.8559563902562184	2.686258367879023
Tubgcp3	7.1028166455808694	7.007068913759907	6.958649317960485	6.308649605326395	6.697519214216982	5.826550794818199
Ssna1	27.96720046762593	33.18537569573772	27.896766732314205	25.78892265502761	24.648770809973392	29.172960271021534
Chmp2a	49.03378219119837	51.335988683911204	54.23164731578847	46.53251570073012	45.27535472539333	46.50355299598285
Taok1	12.753516529861734	11.682977745499954	14.295660454789841	10.944787842451081	10.852680742421834	12.863804297071994
Rbl2	6.309612616299398	5.504700997173126	6.549622994178767	5.357784237234244	5.337904392492974	5.76527656054806
Psmc5	86.82626653934504	87.74065385792002	89.14229791610191	81.30395968124336	77.92947064305967	77.54062450339305
Psmd4	76.28134352195946	77.47973005554066	77.21879488510687	68.53429039251834	72.21090517214449	66.81778795809018
Mnat1	11.094937205805701	9.108235540547717	11.399854983959132	9.348530291357415	9.42106571968177	9.777694184702781
Rae1	18.073907297870807	18.615342358465735	18.038135211072717	16.14979182236084	17.510592168235814	15.784462083564437
Psmb8	41.29516388672146	44.11811636850545	42.61706101588948	41.511581211513295	38.729503512126506	35.43990141927219
Psma4	75.28921113337431	71.1132656874497	78.76527236352955	69.19333747602481	62.32616570938281	72.15530040259094
Psmb3	93.50597896677772	100.42875045422119	90.2652371249862	87.97867978903079	84.3533058353929	84.89804733578771
Psmc1	101.69795330021292	93.1121450827245	102.55015489877107	88.86732837590054	89.51852477094104	90.9368193641725
Fzr1	17.474895653120573	18.63458671639924	15.272479098147551	16.37460776482887	15.57339961172491	14.759321756561732
Psmb1	83.9361638895772	87.28144629382798	87.03594333098657	78.7888328247218	76.12153908736991	79.9593063244384
Rab1a	112.40622400312444	108.96228212304075	114.98366583455963	104.44211053895313	99.88540022813487	101.66136011640852
Vps4a	28.0248500609434	27.253629271656752	29.86227350324561	25.607018330206625	26.40263447592275	25.476822011630578
Psmd1	48.31636708303323	49.945768094016465	53.37368355631545	46.18245287785807	44.98599354859481	47.17488673117455
Rbx1	58.2335244224228	55.90813974295322	54.65218904219349	47.64738163533418	55.2629431210627	51.85077635142044
Hdac8	2.158987404503151	2.5337435172577525	2.2740940298903443	1.8928092227451052	2.2707063320981757	2.2304229425838957
Tfdp1	19.959748491933755	21.230550159654744	20.80197267620412	18.213490420471917	18.388690280400454	20.435797557236
Cep290	0.4330644130765221	0.3483060625289678	0.7545656772936864	0.2837639348354171	0.3326064350757166	0.6586754476423016
Mcm8	0.3472711149489852	0.39405257493855117	0.4247993074098289	0.4586192600472462	0.2733717102112956	0.3287294870665685
Anapc10	6.757854796183895	6.326521891684669	6.325261261580237	5.688348750557935	6.013748363326188	6.191614508068234
Psmb2	96.17781886637955	97.86702191112352	93.51747261096236	93.37734215421257	89.59481342394699	82.20859942019261
Ist1	16.940089788776064	18.21447618317622	18.45800315542468	16.63934296852438	15.856036500836804	17.041879085268768
Nup210	0.0068217385004883	0.013546225782397999	0.0242561496572171	1e-08	0.0033735107660762	0.0275145762289881
Lyn	4.722705017211044	4.671526585330706	4.481214654996838	4.025906465904256	4.2928727449127	4.54861194151312
Hsp90aa1	144.92600781289968	133.3074875100486	162.07218179166335	126.84191665097744	127.41195649253723	154.6223679626419
Cetn2	20.239146000150065	19.879032094913487	19.878638250567278	17.04672655932564	17.730292148996327	20.94610088838889
Hist3h2ba	1e-08	0.22389960514620738	0.0381828039910206	1e-08	0.1486910723371491	1e-08
Mis12	12.309927777033904	10.79058778933296	13.153608743609277	9.530921747429725	11.63181108680327	12.63022026986997
Lin54	2.5821004462196844	2.4257202546500793	2.5822180792034257	2.1575324647346417	2.296660426655872	2.6217235257551286
Cep41	1.9960051595923904	1.9153169014010567	2.0463269262034287	1.8828207654645412	1.7995975050172694	1.8776623185665808
Mapk1	15.253876836690662	15.382008646431204	16.54507058531675	14.759410907995575	14.620207773677492	14.694649485138859
Tubg1	23.32118978559927	22.772128314888402	23.47481860276659	21.544334263397467	22.57135708136633	20.938095356759526
Psmb5	86.18093787118544	85.15280026261219	79.39332221978	80.59133199580019	81.03139338295976	72.86031526531877
Sec13	93.8393492153454	97.50704347861755	94.8234023619864	89.58277376615948	91.35922004215219	86.80733341893804
Cep76	2.3979134351091145	2.1007259573110204	2.3405537242629237	2.4150536007689247	1.9205682938315547	2.0907887901300968
Psmd2	114.74578023717083	120.14412087456955	114.77059872682752	113.37642076186229	109.95619373137028	106.54673384458863
Ran	111.56322650825108	117.13068813450336	115.29619884644636	110.64320721165923	109.60546379520004	104.75335571827928
H2az2	11.739090664554261	11.550889528380932	10.728023885049382	11.156310914147857	10.225568332087672	10.764795720554615
Ahctf1	7.854619690121262	7.463539642053014	7.928653359008338	7.617576645601221	6.474734716158914	7.982026235785165
Kpnb1	100.15854332691876	99.24418850778487	105.32652820022932	96.5557933611824	93.46276356122175	99.8184314687544
Ubb	681.1635601195136	725.2742506757249	658.0120537394453	660.2172587608743	680.0600604145363	623.6212910225618
Csnk2a1	29.398877496642232	29.67296555553657	32.41810849543233	28.319206374502212	29.22671522299004	29.60049110037463
Orc3	3.983371613012445	4.17116953226941	4.4414864974661485	3.5355160995804087	3.9988539002346988	4.498769260493808
LOC100360846	3.7647378583573787	4.819930625176723	3.992418511404212	5.175607396096946	3.3642130626700166	3.429851863634672
Cenpk	2.537948167706424	3.0875200455408986	4.136694228249802	2.735349514887393	2.26189055191317	4.190210801443421
Banf1	59.24082291548333	71.15768874274734	67.0140887906841	62.851786980661366	61.23377987616273	66.12628180403186
Hist1h2ail1	0.4149523802115241	0.7724903985110113	0.5796424248034464	0.5769002036776542	0.7438624713635584	0.3399616123961205
Rab2a	87.75892267371867	84.2105775500853	91.28715475390672	83.87092486328697	82.24679082369289	87.80157675107739
Smc1a	15.461726608566885	14.998135438239707	15.32788681154698	13.535254401206284	13.943906888318985	16.70999390293673
Tubgcp5	7.063159822541309	6.002820147363532	7.052107233064627	5.880220073820316	6.080926102325063	7.4704500750491105
Nup50	15.545747006915473	15.073987940228895	16.02606802996952	16.933156779600267	14.023165269904267	14.121447041275804
Ppp2ca	54.710468318585704	50.82520810818908	53.69773595937208	51.657596876362526	51.34798020376218	50.89706697366602
Gins2	0.7088315389992134	0.6984071109473792	0.5991801890135717	0.6455850759139563	0.4227807556878378	0.8566030905980578
E2f2	0.361075499885673	0.3539058216827149	0.2445490483471822	0.3042401414653904	0.1831385618522072	0.4294370316537264
Rbbp4	43.68071351315097	44.43174981233948	45.02829300027209	42.34603838914436	42.94076936413627	43.96897897001502
Pafah1b1	35.414546179323146	33.08710465156583	38.61588019331432	33.89511237001689	33.663644570472826	36.49690871549904
Actr1a	66.45927363821257	70.79887046909998	66.60552314832641	67.57053335476239	66.35734915702524	64.1130944420465
Golga2	32.33659855339169	32.19040648086759	32.947757410286364	30.94402856600785	31.439129111018747	32.591274966349324
H3f3b	131.9337282647746	119.42974251667567	125.6632301002194	116.63664615114537	120.47802987644971	130.59080291107318
Psmb6	78.85799024416103	88.07186211581532	84.3139409622827	73.65877618354003	84.5255452108846	87.01456510539968
Rbm39	31.955467005483303	29.465843534663012	37.15591886037164	29.977907900307663	29.91249024169352	36.46609309556023
Csnk2b	67.00746391816563	78.19040404068912	65.58940390698872	74.21181419429601	67.60809154631649	64.5262211188117
Cdkn1b	16.870731492951506	15.065644018400432	17.369830281440194	13.93586550106619	16.25657971914844	18.1754259984119
Nup58	8.649196983732294	8.902336273670912	9.284150405152829	8.77906035689428	8.312396238012827	9.29904114538854
Rfc3	6.7865133513944995	5.831085922961267	5.947496314963551	5.994765250916537	6.269611339255384	6.015940758397975
Pds5a	12.842654067880733	12.505388695088325	14.476494623528597	12.419750893491814	13.007114751110217	13.80445855022561
Chmp7	16.61913973972417	17.03461052031257	17.794228113760592	16.596694857277708	17.458603439644143	16.800826606192903
Dynll2	79.52982421233892	79.26045669175741	83.77086815235701	79.2116931744772	76.78512667992051	84.59816924315099
Cenpj	1.363573419492039	1.3431945280400501	1.7634148685181932	1.2448348293685296	1.4866858887186238	1.7033496180617451
Akt2	30.384696455702535	33.62236225131937	32.127570817132394	31.39860405985961	33.08010093665678	31.034163384849855
Psmd12	46.07488613634612	41.60204514627714	45.41961437347346	42.847626353621564	43.16792791181916	46.28698536196597
H3f3a	151.5709068063814	146.88038570154882	159.0630978075845	149.3161662720652	152.4793545180744	153.14098896685533
Ywhag	146.83701342174285	152.3009750433787	149.03209666789675	151.35178318241594	149.39583533931827	146.372039482617
Odf2	10.215291768500627	10.611500772477985	10.01336998220878	10.112961912713425	10.831158427214945	9.851672786143256
Psmc4	60.98986174996781	62.73628600408321	61.551907838910296	64.88921899723928	59.99005147216097	60.33196103527587
H3c1	0.3614995462625205	0.3589230251198745	1e-08	0.2284480828780787	0.2681546930316908	0.22782219363744718
Cdc27	12.139019956025617	12.493954389283497	12.97146284303103	11.667435964207245	12.773536856312305	13.28499157400128
Anapc7	2.859924038899433	2.697260713567272	3.0882043280144216	2.9471978317830607	2.825580135168765	2.9083792970928948
Rps27a	393.3709722434199	253.77715937193662	426.5546558364713	377.575624570344	381.82801756671904	322.3118832732185
Nup188	9.46247064897861	10.007834402050563	9.495029397245757	9.859398132128623	10.072322002263817	9.258526966730436
Dctn2	86.56037757653598	96.4661486185118	92.07949936211807	93.88649013728475	94.54097712504772	89.6278078896688
Akap9	2.313015115115793	2.053243135313431	2.9042249721375994	2.089767101620714	2.245530158783568	3.01505685142311
Cdc26	5.609941895567526	5.700249488090143	5.3826233208644245	5.605943215207104	5.3375816675373935	5.995819030704273
Ctdnep1	29.20874517820248	30.764818493155722	29.940770028118784	30.43699293260819	32.081318194432306	28.922329715913758
Nup62	9.89985896240043	10.392678145007498	9.731929783775653	10.286616770455852	11.58727609352615	8.74390148559081
Tuba8	0.1782379110582143	0.12251600155365719	0.0696443649923075	0.027725960246233503	0.1898458655028453	0.17972493355973249
Ncaph2	13.70590038179757	13.27931467520016	12.010052311710757	13.955906764661993	13.350992599392464	12.665080749805341
Chmp4c	5.401431948570216	6.867642405978034	6.342772014000731	6.875937083168429	5.9187665039620665	6.308530874460479
Ppp1cc	54.29540383265789	53.33429767653279	53.984843775241394	54.90887463354971	55.84038066153933	55.20076833211272
Lin37	8.588135468771203	9.407235202541646	7.647492207364559	9.017559975712496	8.71758668788341	8.782495008125874
Anapc5	121.41261327833163	129.95105030942915	119.9412916963214	132.95532084224553	128.9233609922656	122.27907051783244
Cul1	12.96939417404414	11.776572618116983	13.309963222674813	12.721453322674057	12.65596671222113	14.136893062363807
Pold3	1.6486203487563624	2.537506063230429	2.6768588237578435	2.0381819043552265	2.527725465435042	2.6496364248676283
Nup54	7.0705141008634245	7.38468049404688	9.602934743678091	7.510827640888377	8.557421914705692	9.113612038388183
Ppme1	23.9795434481594	26.31785328429774	24.114409387432538	26.47701912057283	27.00473238748181	24.53244640061855
Orc2	3.0768308087541647	3.8728038903612494	4.527777713145743	4.285666836835811	3.7464576868178217	4.068038444820744
Rpa3	13.877972438659933	11.363471503165695	16.083189617853083	14.72514786237283	14.742686563363145	14.166517501365893
Ppp2r3b	1.714767861029357	2.346967847446286	1.8234706996828551	1.912067860043636	2.345846820882536	1.987627134169305
Ppp2cb	43.43996606480869	46.94470584458503	48.58109693277989	49.63599735567725	48.80403946205264	49.12318033229883
Nup98	15.128811201607	13.547122577312713	13.960238001684058	15.573981413996218	14.860176503630221	14.91229842803894
H2ac18	4.178509355622664	5.650172146336645	4.1237417610302325	5.794211030870018	4.2114556873727835	4.855407650789479
Nup88	16.129069182552048	16.384493393615813	19.17830560377348	17.052758346913645	19.515701941750823	18.708621717063203
Orc4	5.1655790522476295	4.552762880257753	6.269116273278187	5.624752695462612	5.376233655101888	6.214349947055231
Dync1li1	13.636983461435612	14.554531821134608	13.717655960838337	15.221695195860905	14.277082519617338	15.932221163794285
Ppp1cb	24.80337741772975	23.851806373558667	26.61323915114133	26.230443631216	26.429772237172802	29.159633105101214
Nde1	8.999716024625345	9.075705724192606	9.505668159216198	10.123870204029775	10.362755622006821	9.610581371253414
Zwint	39.50296674788768	42.21045768200805	42.538671942384376	42.946217164276106	44.67574619008099	48.26626426589426
Mapre1	55.24624721128172	51.79591099635824	57.08185864641279	56.04696819465747	58.40791506339156	65.43662446316438
Rps27	531.4138037264777	600.8962502080001	631.6057518769775	646.9052661694365	683.4478472525392	603.0892904439693
Dync1h1	51.434612218474726	48.66976775606154	46.15054425017822	53.143725799353966	53.34528217967653	53.990724817867324
Btrc	3.2914255047921004	3.6162353401599248	3.7350070648890816	4.013337484562495	3.850101509389292	3.8374614347750096
Spast	4.4707128063655075	3.752229342067664	4.3093468933181365	4.067371819764769	4.831159788908947	4.954884158254073
Ndel1	7.304037333064804	6.9636645393764125	7.023745691134738	7.61945513134231	8.00245792314817	8.032190032981264
Chmp2b	19.452813439453205	17.444096624263548	18.355221166819828	19.084567401943303	21.073015530244078	21.363584210717462
Stag1	2.2940100746073737	2.158153093512894	2.229827225802149	2.489528979898565	2.4141873133311855	2.5737349959299416
Cks1b	18.71958380290517	20.01362739026229	16.9608254895058	19.965965263184685	20.77805589570051	21.656827601932676
Arpp19	21.14727975861136	19.74586942945212	21.542902746698967	21.46446344309292	24.4982103976776	23.99283161100345
Chmp6	20.27390564543662	19.163678452071085	19.732024884153006	22.035884108813146	21.284390717593713	23.017585887725996
Lpin2	2.184119789946696	2.1708972613029265	2.098949470266269	2.416100362420634	2.3516926919233843	2.5166218130894613
Ppp1r12a	17.341296301186897	15.857146653064337	17.601017930724296	18.402418672799747	19.17157232475025	19.989993046407438
Tubb6	121.27142982082215	132.26251613647366	119.09433690214144	142.19881416835267	145.08715104755547	135.45508166177677
Ube2i	26.851946468188764	26.006950350512064	27.342769185448734	30.45744320272627	30.56717494085468	30.28316209344049
Cep43	3.576397765888842	2.9458848487113594	3.9133854492819053	4.078246048271504	3.3721985055598855	4.4474464027341645
Tuba1a	158.8651853617264	179.22144867021422	156.60400222174337	196.74258850964733	189.39282684599672	180.71458624404912
Dyrk1a	9.140015921864	8.921494026817074	9.48169146817254	10.577932394147156	10.283409748448477	11.024909184625042
Tubg2	1.5596432188451859	1.6637068547173277	1.5975664477516869	2.1243556769202456	1.5935521546720868	1.871589633140688
Rb1	2.4349760485294802	2.089333696899633	2.3799974592216415	2.537193073307271	2.6896938506045847	2.8998276952478252
Hist1h4m	0.0584647498152965	0.2321921827442151	1e-08	0.1182289385808525	1e-08	1.0021926084406811
Tp53	39.50341128406762	35.939405464852236	37.07621340535638	44.760803150360324	46.297627485826496	42.42578257351217
Ube2d1	2.390910160669754	2.215951041051576	2.569706182409775	2.7961846215446604	2.8721700537801005	2.9799437913299616
Jak2	14.316782306957117	13.41171702845712	16.255475342200707	17.740894176548316	16.870162740296564	18.40436220523281
Nup42	1.5408464238237027	1.7984043386146564	1.865128389374468	2.2457971814073163	1.8725346501804527	2.1735293122806416
Dsn1	1.837910597255585	1.4722468534959914	1.653098528355478	1.953027733899672	1.8602310576804015	2.215236596659544
Tubb2b	0.0702201156500447	0.3764859840447793	0.2282814829712268	0.3124020721753845	0.2639134169062389	0.5806087636496934
Ube2s	61.29361916635946	58.674447712713395	58.869168467042	76.0163372391605	73.739709207818	69.51172044540539
Pole4	10.94828651102358	10.087056153189419	12.158840325118819	13.242692594853885	13.141992511312276	14.358372090947197
Nup43	4.725553784630555	4.942329141494407	5.279150937721587	6.4954536821390985	6.520018609925844	5.375438544041061
Anapc15	10.627807584701964	10.33449160601582	10.277551751963525	14.500215829187393	11.306063216527937	12.766475814119609
LOC100910200	0.8546278945611818	1.3975898395750526	0.9193054958984597	0.9149563681257065	1.6905321518586702	1.824899233837284
Ccnd2	23.343308466521894	27.58287835264045	23.23857769938655	33.62626384502021	30.67305232479705	27.978884273439746
Akt1	61.57859818639162	63.3092303899666	59.0859707101178	80.96951892952251	76.30325699048791	72.16469118200062
Cdk4	94.60685663186159	95.4238353010622	89.50673794187635	117.49132124537799	125.02865519186156	113.57024263935315
Hist2h4	0.2391739456080312	0.23746927757931088	1e-08	0.1209159596849628	1.005354351938679	0.4220463582738162
Psma8	0.0128686076223886	1e-08	1e-08	1e-08	0.025455273389240203	0.0648798057750121
Ppp2r5b	5.384117789095869	5.330976237397608	5.084523510079414	6.23347545384082	7.546398319790081	7.123736380271432
Ppp1r12b	1.0764121589264875	0.7831773671650563	1.14706808275851	1.1790723030134063	1.357532420983124	1.4644185392909532
Cdc14a	1.6655873219689232	1.2581586918270564	1.8432699392563683	2.281053786136761	1.856226919867725	2.2312442008857203
Tubb3	10.435607865233457	12.854859352427178	11.679646716453561	16.526734401257382	16.551263497438367	13.854173258238324
Hist2h3c2	0.3334960610590858	1e-08	0.338805083441451	0.5058033488230137	0.3298428595507182	0.6725567662029427
Hist1h2bq	105.81594250784234	107.93541232344856	110.0859439624676	146.47368258791056	148.63191495406986	160.8909548941755
Src	13.907358164387732	13.97566828767456	12.093084323871652	19.548264281188327	19.396334849918585	17.654262662612435
Emd	23.33973956258022	23.540009102028648	20.16319473157408	33.66413177960066	34.572845849327784	29.957181242027172
Fbxl7	4.2513654160078795	4.399779022673981	4.558507294057403	6.5909150462396475	6.506411405164711	6.3222161129021055
Hist1h2ai	0.1940837774196319	0.4335760702728812	0.4436402598546869	0.5396617690447728	0.7678309056754424	1.1252922055731611
Haus7	7.828645709745477	9.32741817902588	9.82298886782917	12.998324327409977	13.529679214656957	15.192409543172445
Hist1h2ao	0.908371606874492	2.284806620315518	1.66109802991627	3.3064791251703913	3.713473727959748	2.6257235096004905
Ajuba	9.54011138032443	9.065025826471448	8.94072436919614	16.91589460368205	16.220843174052636	16.69236374376849
Prkcb	0.030140949376508002	0.0374076542511166	0.0535863433511407	0.1676174525037758	0.0819796213819171	0.2051487267138603
hist1h2ail2	0.051362742375694305	1e-08	0.052180400920483705	0.6751359199546517	0.5080009279631452	0.2589562447636059
Dync1i1	1.0239659274154096	1.1270038387362735	1.1531639089778924	2.8331543470032834	2.323827474350618	2.545254190615159
