# Supplementary material for: Peptide-based Self-adaptive Implant Coating Sequentially Regulates Bone Regeneration to Enhance Interfacial Osseointegration
Source: Research Square preprint supplement (doi:10.21203/rs.3.rs-5132912/v1), 2024-10-01

RUNX1 regulates genes involved in megakaryocyte different...(R-HSA-8936459)

Heatmap of the Analyzed GeneSet

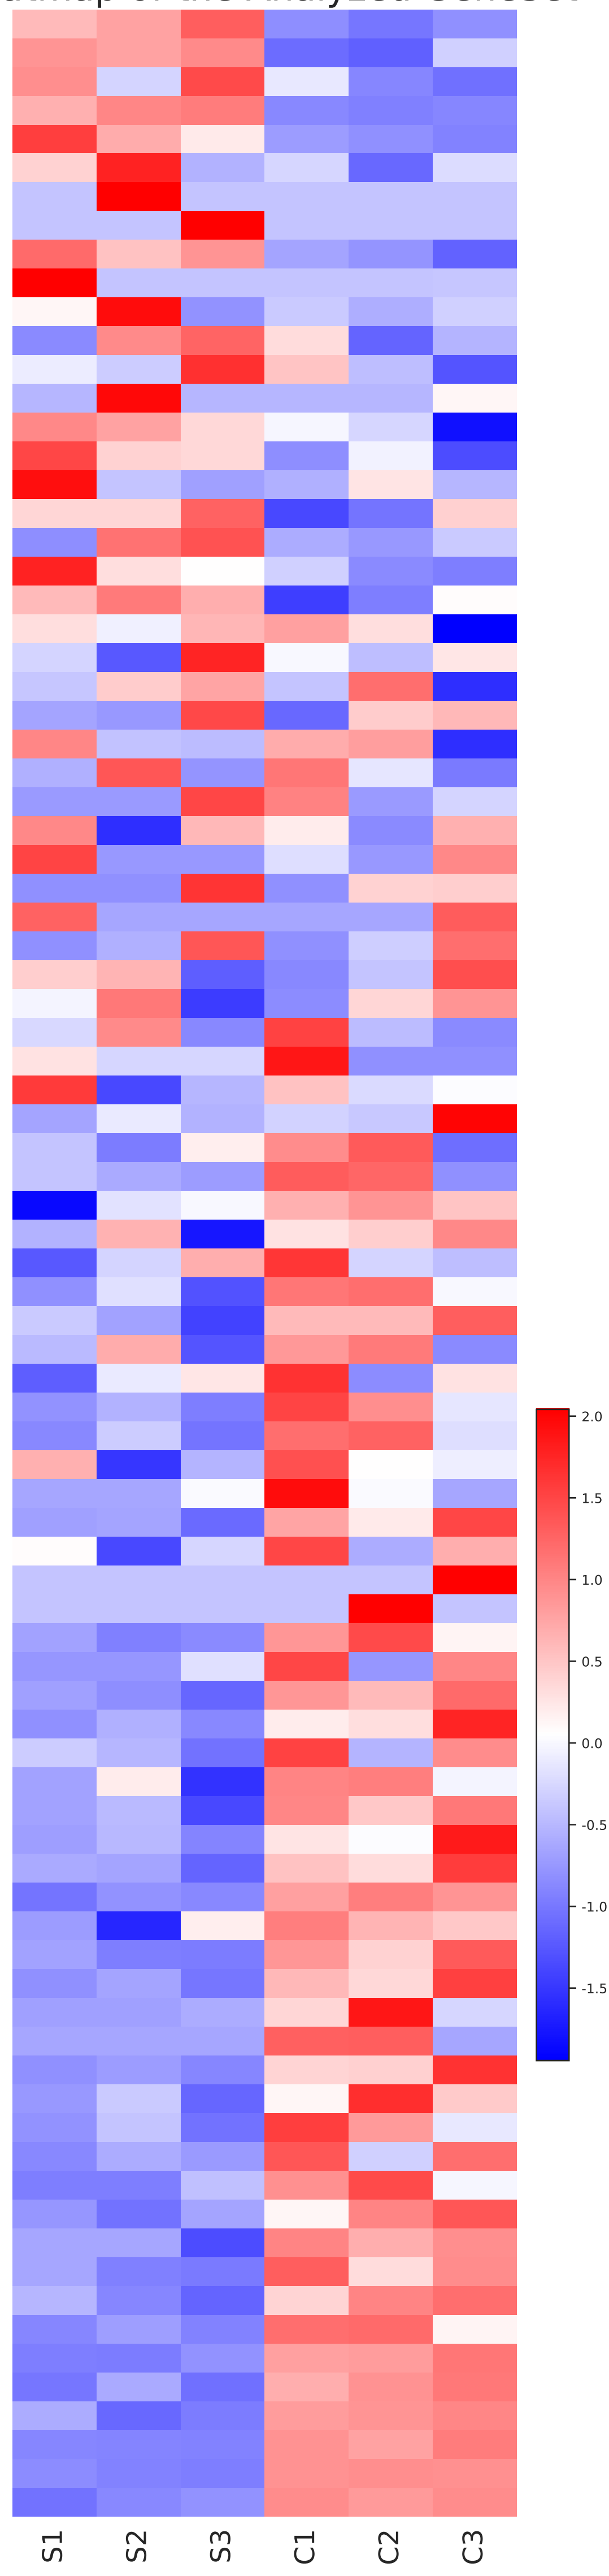

Supplement: Supplementary file 454 [file 1195_RUNX1 regulates genes involved in megakaryocyte different...(R-HSA-8936459).heatmap.pdf › Source data/1.RNA-Seq source data/2.HUVECs/result/1.6.GSEA/S-vs-C/rct/1195_RUNX1 regulates genes involved in megakaryocyte different...(R-HSA-8936459).heatmap.pdf]
