# Supplementary material for: Peptide-based Self-adaptive Implant Coating Sequentially Regulates Bone Regeneration to Enhance Interfacial Osseointegration
Source: Research Square preprint supplement (doi:10.21203/rs.3.rs-5132912/v1), 2024-10-01
Supplement: Supplementary file 457 [file 10_mRNA processing(WP529).heatmap-data.xls]

id	S1	S2	S3	C1	C2	C3
Cstf2	21.969174828005183	20.959228897222978	22.793349470338452	8.650234701730215	8.549892085848873	8.471237599853282
Snrpa1	15.22974095563577	14.656212432782597	15.529280654702461	9.868233821393511	9.70844413554187	10.521203347641524
Fus	91.94643755616383	83.56282474867469	99.17164565203129	60.3937603279541	59.36172830755498	72.85721976599832
Rbmx	6.4660874784314055	6.30423902105658	7.141529930015255	4.833462527238549	4.406048103085476	4.869206053523438
Cdc40	8.1641088201143	6.626571063881185	7.942962416163218	5.630063122966727	4.831133229043863	5.9011783466999015
Eftud2	23.43003133849925	24.00753922684228	23.368483037136095	16.872143497709093	17.167202217760472	17.054878421951358
Hnrnpd	45.06499865150034	41.54486535805272	47.70117108606672	31.959255666087476	32.99241012617512	34.63036157140213
Snrpb	25.331428663080334	26.06614882330509	25.71920766516791	19.126895765282182	20.14110860597296	18.613570865833466
Dhx38	13.410390734172926	13.251457072830219	12.262567646774908	10.15074871312858	10.013356348123576	9.356211475277744
Tmed10	269.24782969214857	270.13972893640243	271.96525081843413	208.427366217968	202.9148138842291	204.76063547593824
Clk2	8.182518752544707	7.723773326285142	9.805983185945285	5.908313954182424	6.67463599241107	7.383232363721441
Linc00176	1e-08	1e-08	0.0109740794408499	1e-08	1e-08	1e-08
Srsf2	47.20516616930791	44.9319961011767	52.30015668314794	36.63655698014817	38.569431642164986	39.40223735373353
Sf3b3	26.923276842864905	28.51685055444994	27.37257797335204	22.215808361176094	22.647955306872625	21.122449459974344
Spop	19.440356463640292	17.461412091691205	21.07104470532888	14.101822642008797	15.331653724564857	16.783878895817654
Dhx9	24.961591972604047	23.391836699899738	25.73505988492358	19.54936407782737	18.893249910156523	21.257742693733217
Dicer1	5.126639305246223	5.135771733730079	5.561076387866576	4.269677849443922	4.3675742937060615	4.366980602862555
Srsf5	52.87498019230328	48.23164648336931	60.8629939395155	41.648142425976246	42.18739246432923	49.5915513541102
Prpf3	10.953351439824718	10.521934892121369	10.87865295930543	8.692136344968544	8.21302086304143	9.760833734292007
Sfpq	20.388693220345928	18.94959452130104	22.319493778646265	17.101806576926	16.634051151437028	17.320660039564984
Hnrnpm	50.83773869751626	49.59346338581976	54.254002888275735	40.32562959591613	41.025126208022314	47.11822028806929
Ncbp1	17.888240239518073	17.41541610020299	17.75730865900955	13.880747051974188	15.108930537807092	15.135529510084973
Sugp1	13.36691104328387	14.247181498681037	14.007496404763359	11.48486487802509	11.7467973423808	11.398962979871897
Snrpd1	32.43198567844904	29.575101077949032	33.05241495386353	25.66181927456869	25.44644772360757	28.17546969312873
Sf3a1	14.074862034219557	15.0329399590098	14.169543586456639	12.562059187509572	11.630114332515097	11.933126304147013
Sf3a3	23.651127850726912	24.90818952494937	24.99094448897421	19.092822152131568	20.55177582004973	21.963518242888316
Clk4	6.28812492941429	6.300585531236672	7.078494637230879	5.191398978093054	5.173193115460316	6.172538024935101
Xrn2	23.22551884435595	21.46402395865866	23.60191808120772	18.077085255919012	19.531924470372402	19.813775491127007
Srsf7	20.53227387268179	18.71741873844355	22.94666478224245	16.50045161413347	16.416033441188187	19.45878851317202
Sf3a2	20.3630205581489	19.342600325868872	18.71938006143421	16.49656239145577	16.86107526052578	15.900483152847231
Celf1	12.197155350329814	12.026883214879197	13.350653900978015	10.656516748137564	10.545872838523382	10.606161196359801
Snrpa	14.393720524619757	18.763928958215804	14.9577330435126	13.23903403699164	13.891919621742815	13.701328327975029
Tra2b	36.16826024774117	37.21277914623685	38.81243916526285	31.601800842628826	31.41552019281841	32.443009123760675
Srsf4	6.774328819780919	6.960165121770122	7.021910885846605	5.980372432675863	5.8255585036520925	5.874825135811721
Cpsf1	12.061305524534133	13.345730901520072	12.571994761015665	11.603285700567833	10.284848181937045	10.569862786470512
Rngtt	4.307458955444316	3.661434012390932	4.245946524147502	3.0761770972480758	3.1812747181478307	4.219446230751037
Snrnp70	72.96544483849377	68.85745236190635	83.23217970480671	62.93345411330449	63.895375855309155	66.43119145257991
Hnrnph2	37.442387953906064	37.15641087279988	41.92051701767828	32.41815595443945	31.37744077441499	36.31833824201428
Srek1	6.196129941514598	5.24119015626621	7.302189708282768	4.83078250346704	4.960569067067039	6.31848104831032
Srsf1	27.031619218410636	27.23193221686229	29.812668262419617	23.68189072135157	23.208055540153353	25.397603650444353
Snrpd3	50.03048227817178	47.36149360622781	51.37463635119708	42.693241392208684	38.626159789672954	46.642546087380296
U2af1	45.87220218300283	45.01566053266183	48.086760046703354	38.292103511897935	40.55290228071749	41.20381749996108
Cstf1	8.06328309757724	8.818586484341118	7.055071487442005	6.869948902386102	7.43519569843195	6.431529866025978
Pabpn1	31.97949513879871	28.514939644775662	37.36636681040157	27.26299790342941	25.90568844405729	31.64749193928916
Hnrnpa2b1	73.69971807318701	68.51756356379545	78.98281542015776	58.56463689479737	58.99555172198208	74.22822892875055
Srrm1	21.89447148543443	19.926201015312177	22.89623081667933	19.268850539929648	18.17955332315793	18.75176136267197
Clp1	2.6901853307888803	2.4773774344920114	3.1584052513212013	2.4416937439726585	2.4167700748040266	2.3771655505472467
Prpf40a	11.024198164963225	9.612271105565332	11.850840734312843	8.89700119876851	9.312597142165709	10.039023588893652
Hnrnpk	126.11575836862563	120.41904313863414	127.50444431678535	107.61927225365245	106.14325339141958	112.52186840499792
Srp54a	20.099586492964946	20.04635896271252	21.954862855615602	17.554143559668688	16.758492483228768	20.096603710444
Cpsf3	24.32563723340495	23.93799299962907	22.862487315429192	20.48500449935485	20.96852962474883	20.91631897574055
Prpf4b	7.062276436021586	6.472342800590927	8.27604450026926	5.879775425618125	5.932509352964215	7.429810379805111
Hnrnpr	15.43803505852408	12.899643409385396	14.08289969874363	11.32754029469841	12.08688257903029	14.0275290958307
Ybx1	279.4029915873021	271.45382708426376	277.5981159949331	240.6769354357688	245.2189267714575	245.7726125957171
Snrnp40	14.911640702533575	15.86888381598745	16.151321868201745	12.05618387894569	14.83193347813063	14.609694212898923
Cpsf2	9.54160720151487	9.252911594357604	9.714031255457519	8.188851607097762	8.28193229931648	8.745074486499195
Mettl3	14.499771957160107	15.459752797824967	13.957092968286657	12.985860288357161	13.968553307863777	12.165672415224325
Hnrnph1	54.01768780743089	47.68584995496885	59.3701826666764	44.1471850439141	45.05681917441574	55.46552779854434
Lsm7	35.82825556408308	38.280045943784906	36.44721245597428	33.66300040229366	32.36058212228502	33.4743046616604
Sf3b4	43.13977001206778	42.816963684535004	41.11188504690719	37.40349152996493	39.5660806387551	37.44118636868984
Prpf18	2.9954561221758205	2.961785043670497	3.249589918410333	2.6287811991414802	2.585216814638376	3.1236833430629782
Supt5h	53.83647860591826	54.02413814668939	52.178382976200254	49.10705895197942	48.788266702570404	47.098723978059034
Srpk1	18.47030520943497	17.69097382730707	17.269107513602815	15.950003110656617	15.88983382328346	16.569519875251185
Sf3b2	49.61952922766061	49.54947212235911	51.39902468079544	46.26095381792721	45.46862767183728	45.43263388803831
U2af2	50.792718680896	50.34252554184965	49.41510120045653	44.97466307490509	46.418767097522746	45.988057167122044
Dhx16	7.1721352777819725	6.319271478271247	6.23341290120328	5.573887608984649	6.2886257667403305	6.148458250212428
Scamp3	60.7622727185999	64.39419443425942	60.15291625135964	57.23807821480321	58.8979498849244	53.251003625427934
Srsf3	33.09175573008973	33.88802288023878	35.50441069569932	31.340655810469784	29.938582750457332	32.619119856009306
Clasrp	5.3415312774764105	4.95028888065244	6.0950981915010365	4.921345765855832	5.2830187702926885	4.812216009096042
Prpf4	5.5228724142476535	5.370357385619046	5.405954193675015	4.387623937665016	5.124226522401957	5.427515602356736
Prpf6	31.064014755438752	32.94111732355615	32.097316883617786	29.579721353584503	29.612956419482774	29.514408924378248
Sf3b5	99.86031755973583	109.20522190066632	99.02089093439939	97.31003590485334	92.39439473765512	96.07232727632763
Celf4	0.2393842084085657	0.1963427318974434	0.3330714591216726	0.1315459332836409	0.2573499255835274	0.2991029981706932
Sfswap	5.371296854416984	4.7997125368558775	4.968405077456737	4.782870634385324	4.52292719538584	4.868513533392362
Dhx15	38.84424923217738	35.49482442177155	38.822644679174154	33.137323639060675	34.345558580942935	38.66015931538761
Ddx1	75.65878541409475	72.00785518954277	78.91420810252603	69.14124228430364	68.53553205582703	75.34000990725094
Hnrnpu	52.61335742344656	49.07097984360606	54.24913064797001	45.96204743670467	47.99239835325121	52.68958767479023
Clk3	8.283381678656552	8.51523658130852	8.30024792422916	7.836822494756119	8.113614671389321	7.7616378505670305
Ptbp1	71.98050081083083	71.7932835090688	70.98233282726926	70.43833791036424	67.71736444122627	65.49615384487475
Dhx8	9.925268762666365	9.358610280804196	9.515554196709624	9.240524164871902	9.122001038249445	9.260086751341833
Ddx20	2.8350253796678704	2.4718142065307336	2.91358240742969	2.517224778198398	2.74431085135227	2.631974087424114
Rbm17	23.51378755446457	23.910186889391866	26.788701157791092	23.367007286619078	21.95516468321968	26.001069680440466
Phf5a	47.13540570496247	48.5276899754986	45.387624358416176	45.56400813060972	46.78303157194738	43.238257932704
Smc1a	15.461726608566885	14.998135438239707	15.32788681154698	13.535254401206284	13.943906888318985	16.70999390293673
Ncbp2	48.05768458010296	46.663384442645295	53.83990491317986	47.11333406891338	46.12936427363182	50.158664152351406
Ptbp2	2.6336545502339943	1.9045171445400892	2.7821024156182084	1.7648878257455611	2.6109050665634865	2.7551351562426607
Rbm39	31.955467005483303	29.465843534663012	37.15591886037164	29.977907900307663	29.91249024169352	36.46609309556023
Rnmt	4.471336467214551	3.7552343600253737	4.633120236183171	4.008671155487922	3.9532577613520936	4.721196448317267
Prpf8	42.914982170549244	42.10965218547076	41.90326753411104	43.19552806550903	41.56946853780035	40.51849242781976
Cstf3	10.810136242481677	10.357313449805329	11.847346649032081	10.523673872691274	10.106833058371256	12.67729173350267
Nxf1	30.89615498199808	28.939573912626404	34.35989985063053	29.54625073055758	33.31471840164053	33.20590930903772
Srsf6	33.727814130260825	34.190099161211855	36.93525027933284	36.16760237426513	35.758232345409546	35.368482860681475
Srsf10	7.811546627977044	7.4493484420504625	7.803540022117018	7.712210200827488	7.63073284187884	8.556434397109157
Nudt21	9.23956360443157	8.986849259292446	9.990121191912948	9.835818736832552	9.743308724063379	10.075738825698556
Ppm1g	35.05734553277961	35.92749656324805	35.593181104210615	37.59524077675712	38.60534414585196	37.569543027292134
Snrpb2	15.773769463579521	15.591583835203627	15.275383647594682	14.812383246926773	16.730226384132983	18.810135221874734
Cd2bp2	15.972665795525502	15.960638091715415	15.914405860198482	17.236395330548703	17.603976138991158	17.46983165998669
Cpsf4	9.429146423592707	9.10043516755553	10.221436274604043	10.585861878692995	11.357747786075677	10.42406864375167
Papola	21.551520072117487	19.99979714588582	23.310479093471304	23.073422868254656	23.633475302503143	26.44812322651061
Hnrnpab	154.40655726617135	150.35212699152353	150.93053262863873	166.6925677877992	173.1104626783834	177.5200959772263
Sugp2	2.0426846024747167	2.181135231475975	2.4251629208385643	2.6489481236573296	2.773441264619413	2.952477822021838
Srsf9	26.68075470805289	27.018894974834463	27.626753033053664	33.8752923216603	33.51187469152012	36.10107622859166
Prmt2	11.448910391007475	11.659013631620752	10.98758385354249	15.075907514109803	15.536889969779294	14.053280752543767
Prmt1	43.48182150354008	47.26710867681872	40.43524292748217	60.63271790234874	57.92214549705682	54.58517969715953
Celf2	0.2482035232981402	0.2483981200463145	0.3224767871478016	0.4409329352282976	0.431309655532785	0.4885832120943908
