# Supplementary material for: Peptide-based Self-adaptive Implant Coating Sequentially Regulates Bone Regeneration to Enhance Interfacial Osseointegration
Source: Research Square preprint supplement (doi:10.21203/rs.3.rs-5132912/v1), 2024-10-01
Supplement: Supplementary file 461 [file 1_Relationship between glutathione and NADPH(WP2562).heatmap-data.xls]

id	S1	S2	S3	C1	C2	C3
Nqo1	894.6821790485358	921.6159441269632	909.0405393737236	68.69985844488146	66.05850646634667	68.18367461601659
Gstp1	500.321704418056	516.810635737434	494.17870100634735	106.72428525443492	104.0905111195828	101.34004741539319
Ptgr1	152.45558642183056	152.10557614862063	160.7445780132426	33.06782873559368	32.366511412214436	34.51492203600924
Fth1	14914.332884871563	16299.8905266539	14676.117161457576	3809.538481670412	3841.849768844073	3548.319284142597
Txn1	1801.482000403252	1918.7279351240743	1955.465842161412	769.0254400063637	804.1178857869768	791.8071832400535
Pgd	328.90946038589766	334.59699558292243	331.7802795408571	139.81883270004	140.82077771888913	141.6210410560225
Gsr	31.639221044314738	32.404927902106515	31.349725024476232	17.13424760016886	18.089473346522333	16.880811046501314
Tkt	131.4704956432261	142.46411383588682	128.59965017175765	75.43970778569258	75.91740812328156	69.82984467518075
Ugdh	84.03266388035601	78.45609812032014	85.26667399098302	43.47436771005562	47.12044772723125	49.44002708489082
Ftl1	3550.724809984261	3383.20598950582	2984.75692629994	1822.522812197148	1926.2764799390402	1863.586854963693
Gsn	187.6368463997936	198.52704869470202	185.7691089195766	107.01175739467287	110.04971898295796	106.59330623042314
Gss	34.939512042608754	37.94958637422828	36.38249310677115	22.300517309841652	21.59494495130185	23.317919882185667
Alox5	0.2220100028795789	0.2458616281825465	0.35566592012912507	0.1899422663388742	0.1013437199953883	0.0774907722094627
Cdkn1a	225.2471563782602	244.81389495302528	229.08205393192696	155.36096672887274	156.42312077928767	141.03910800197
Taldo1	101.98632160099055	106.30278066545539	100.236527380618	64.4298316571581	69.4745956682061	68.91685713413774
G6pd	176.03552063079954	185.07424321680028	165.43586536021175	128.1649342683324	122.96607704568807	112.71279863880531
Tfr2	0.023123271352729503	0.045916919160843304	0.0861350237883376	0.0155868316390772	0.022869973201270502	1e-08
Casp3	17.781763382308625	15.987098274989131	20.394406860755527	13.01954661222615	11.912954917469607	14.042574722078397
Gapdh	1467.4555987187807	1569.3996378415318	1346.234049942874	1121.6234272945262	1134.6306705089348	994.5628706629212
Kif1b	12.369499438888097	12.226968419314051	12.731718875923592	9.303497209633857	9.14068334375331	9.997404650152024
Ugp2	22.32170769429037	22.28322671205639	26.15317334265255	16.684229852379186	18.37262748059227	20.211207531806267
Ltc4s	1e-08	1e-08	0.0656348264102128	1e-08	1e-08	1e-08
Tfrc	24.3431169902717	22.145709181125756	26.47711890101344	19.898793620061753	19.170310431486328	20.871996915137174
Rpia	11.289506144787177	10.438661364263242	10.983131598853506	9.453632921633629	9.694965863151586	9.193017058535853
Anpep	156.2009287669674	160.13258347116914	148.4484565309293	140.54139286301736	138.95219192113598	131.0303903672468
Map3k5	3.758021924304544	3.7730758602554544	3.8022798238510167	3.2962458747495345	3.2205170736443685	3.5885108563347266
Rpe	10.457575369968312	10.401208984672637	11.070207048362652	9.454431197963812	9.528609345765204	10.129671493784583
Dffb	3.2560128044132504	3.2941885704409364	2.972874466428816	2.469147901608602	2.9757623933270185	3.314346827067112
Pgls	23.9373247321038	25.735731883907814	22.40491143859475	21.009146267762297	24.65089421773173	20.82095319150827
Pgam2	0.45015627663869	0.1191861062755476	0.1219526600093436	0.2124074957583758	0.1484083897091317	0.2118255536203184
Pgm2	13.710057228215295	14.079282194420516	14.011403779062498	11.950004280937728	14.28792064707975	12.845079024302573
Gclm	8.179169961176264	6.856925111352601	6.935257894377122	5.824443296034541	6.106526098322033	8.552273304686812
Pgm1	38.99942056914486	40.54243309529792	38.05584353506588	37.26349480001553	38.20428607149833	36.45481231840681
Gpi	193.27023457731985	203.1455256825879	181.54837898617373	191.06725310767072	195.4903560437209	174.4566809742646
Eno1	646.5173372321811	693.7475281144756	630.8477534980839	659.570358354701	657.0108091534362	611.4018021272661
Dffa	7.261697436819974	7.223968152918356	7.018480525998651	6.963849677864583	7.049406901099017	7.721160240370418
Fas	16.119367698440687	14.881035381879546	16.71517988475305	16.551702687792393	15.23646577199207	17.086181902749143
Dpep2	0.6247071363819403	0.4215322908208566	0.4498019299915576	0.4722040491641762	0.43190488881743627	0.6360347292370042
Aldoa	1.7942501927787586	2.438558644092389	1.7630490194984327	3.2268787020274003	2.152787999490029	1.4829667705717058
Bax	83.67063185864612	89.46026733506457	81.99571439446731	94.52807831960384	94.66053692799716	95.53175622356447
Tp53	39.50341128406762	35.939405464852236	37.07621340535638	44.760803150360324	46.297627485826496	42.42578257351217
Nnt	30.633044169238328	30.957656398722726	30.5298012898034	38.08601089622019	37.19087200120637	37.219725807951534
Ugt8	1e-08	0.0257074539478969	0.0131520932227135	0.0392695967210869	1e-08	0.0913780055803342
Gck	1e-08	1e-08	0.0177430748824215	0.0309034778708018	0.0388658740720835	1e-08
Abcc1	14.596121718933738	14.119964157997781	14.898542318262848	18.5994974850937	18.534603592136406	18.817621941942836
Pfkl	45.81151147551439	49.58603965919025	44.881821924455444	66.66025180102775	62.29190378242009	61.029296154216006
Mapk8	2.6659496772435154	2.675410426577563	3.4489325277603538	3.830120415534581	3.97334561948756	4.666138763905404
