# Supplementary material for: Peptide-based Self-adaptive Implant Coating Sequentially Regulates Bone Regeneration to Enhance Interfacial Osseointegration
Source: Research Square preprint supplement (doi:10.21203/rs.3.rs-5132912/v1), 2024-10-01
Supplement: Supplementary file 465 [file 2_Glutathione metabolism(WP469).heatmap-data.xls]

id	S1	S2	S3	C1	C2	C3
Gstm3	0.0081228983791406	0.0080650039932596	0.0082522090443715	1e-08	1e-08	1e-08
Gstt2	8.915766994142976	10.588618807247506	9.458328754669271	3.640612021513944	4.239471827179759	4.166588951125471
Oplah	9.7162259166727	9.77976768457762	9.303424472120485	4.30620949644359	4.601287668911414	4.3737418478522745
Gsr	31.639221044314738	32.404927902106515	31.349725024476232	17.13424760016886	18.089473346522333	16.880811046501314
Gss	34.939512042608754	37.94958637422828	36.38249310677115	22.300517309841652	21.59494495130185	23.317919882185667
Gstm2	190.81332753780092	209.34083083854833	197.98897462861916	134.8681416964187	122.22953430163864	122.6735895171186
Gpx3	480.7820620330932	521.9704307845308	477.1120587436126	335.53312908646967	342.96932226730803	316.388431135584
G6pd	176.03552063079954	185.07424321680028	165.43586536021175	128.1649342683324	122.96607704568807	112.71279863880531
Ggt1	0.4875061673784635	0.6514069521994721	0.6850420942260473	0.5159576971683157	0.5497592485623093	0.39969051250775217
Ggt5	10.996731958587185	11.303296778954488	9.445893526736663	9.265783114766133	9.084475014610181	8.472733470995452
Gstm6	0.2286746508052204	0.2889661248945785	0.4646299702419197	0.27325519392370007	0.3289740899733238	0.1257722567701727
Anpep	156.2009287669674	160.13258347116914	148.4484565309293	140.54139286301736	138.95219192113598	131.0303903672468
Gclm	8.179169961176264	6.856925111352601	6.935257894377122	5.824443296034541	6.106526098322033	8.552273304686812
Gstt1	2.353354628552995	2.6142899875421732	2.1066637354923627	2.5550451447686897	2.2035652138620483	2.129854389266712
Gpx2	0.3751005189139817	0.09310677233802679	0.5001568065358452	0.3792690482197647	0.3941785440670464	0.1891149790709264
