# Supplementary material for: Peptide-based Self-adaptive Implant Coating Sequentially Regulates Bone Regeneration to Enhance Interfacial Osseointegration
Source: Research Square preprint supplement (doi:10.21203/rs.3.rs-5132912/v1), 2024-10-01
Supplement: Supplementary file 469 [file 3_G1 to S cell cycle control(WP348).heatmap-data.xls]

id	S1	S2	S3	C1	C2	C3
Cdkn1c	3.916359529756604	4.346567958548879	4.115901947815346	0.8648019163019588	0.8570584028202359	1.1120841140066717
Ccnd1	235.5723156204571	230.54435733474	240.2908752556232	78.22491203950719	78.42743659374106	79.86520360317166
Orc1	0.7782891359688053	1.0303226953929707	1.0756082991222375	0.4820883566266923	0.2149790185463816	0.24038378398192228
Ccnb1	6.127544165985409	6.593853348265486	6.1074971496636286	2.7430520308091944	2.7189612323887493	3.2315807696778416
Necab3	0.4168001878114811	0.2167678493913408	0.2822902388355426	0.0301023042635657	0.0785208559953092	0.090059475048969
Ccne2	1.8764803973981519	1.5811887567442018	2.351586318753554	1.1359038585003443	0.7997571381728963	0.921171333537607
Mcm6	12.550350542544189	12.041232614052474	11.35456413451825	6.254505147875331	6.206435392620653	6.073443796576212
E2f6	20.160259112434332	18.83364622453696	18.355879000818014	10.67116791504179	9.788779188128585	10.206794886377027
Mcm5	7.180974832146778	6.594116135342572	6.2531064842034185	3.73411426105411	3.569945485320273	3.5323259386390427
Rpa1	24.73219407314975	26.08167812960536	25.38747117063521	15.179943638339742	13.050255328275787	14.335194193308284
Pole	1.7805606873116353	1.629654774507568	1.8089059599437602	0.9296343663966137	1.027816305339133	1.0250191734391854
Pcna	38.619992709025105	37.71646586305575	35.41914970491197	22.93004206155065	20.652996295704575	21.529353482486098
Cdk6	19.141701453881698	17.061484729892268	19.08589690279556	10.631079311801965	10.246962239943441	11.540284350250786
Wee1	3.3626699744502164	3.1309000646962297	4.214732461619324	2.0268562885730437	2.014820857638624	2.26986254880946
Cdk1	15.272179921277324	17.267849429080112	15.51530227525721	9.598524579023922	9.299448489796799	10.028917301520467
Cdkn2b	31.976685193230146	31.661724179646054	32.56432602440686	19.43051624789632	20.439839079621144	20.39139054758368
Cdkn1a	225.2471563782602	244.81389495302528	229.08205393192696	155.36096672887274	156.42312077928767	141.03910800197
Orc5	8.082289937182736	7.274973863313582	9.195889997451605	5.504627212351034	5.467469889777122	5.141749368396393
Mcm2	12.154725901724852	12.346643413552636	11.60718484091374	8.134104769820254	7.914958269761027	7.673342680926198
Mcm4	12.913458511791037	13.159381875668604	12.434623109717299	8.812197981919208	8.248145732098463	9.367251267028404
Pole2	0.6641977918360737	0.8221886872582043	0.7448774665461411	0.3052632272374472	0.5886703633511725	0.6001558476390193
Mcm7	8.000859609380992	9.017326170682873	7.7254776435256876	6.413514491920223	7.0488220319246135	5.805408585375058
Mdm2	54.095944203388434	51.237151957119686	55.94125219753413	41.3831481083454	42.06084305121821	43.997829675067024
Rbl1	2.3566221839699493	2.1961929249441745	1.9627190341895964	1.6325798052340235	1.6107954315642976	2.013958889335339
Orc6	3.6807225610365726	3.262936511089768	4.106571427576951	2.8909065322389593	2.925323824891172	3.1480883657174514
Rpa2	2.416785417131525	2.5117474566096942	2.372354092644646	1.6883354389521803	2.011586677832641	2.240726615302858
Ccne1	8.599725395166304	8.181705480210532	8.018386748114342	7.007798397909125	7.336299120907801	6.427641059859253
Ccna1	0.3155446143597987	0.1904346016385955	0.0942846724549635	0.13137406769272938	0.15910372054889618	0.1434916722523393
E2f1	1.8111527332213584	2.038009952455324	1.8399850096903843	1.70919490419286	1.8489643498676527	1.4610104137508622
Cdkn2c	7.039024127469023	7.152912407622732	6.160672584085059	6.565913275028403	5.556459457421031	5.948114489928816
Ccnh	8.186992476910083	7.7796060353457035	8.11097781899326	6.627119572377236	7.007881891398085	7.829927511198692
E2f5	3.0445252778532863	3.543564915352861	2.885059743973069	2.522185216556681	2.6063109324899	3.340801249820613
Mnat1	11.094937205805701	9.108235540547717	11.399854983959132	9.348530291357415	9.42106571968177	9.777694184702781
Tfdp1	19.959748491933755	21.230550159654744	20.80197267620412	18.213490420471917	18.388690280400454	20.435797557236
Pola2	1.963866513742568	1.8388448255086247	2.1868327567584567	1.5899662315068168	1.9838275617399599	2.0013923405897485
Orc3	3.983371613012445	4.17116953226941	4.4414864974661485	3.5355160995804087	3.9988539002346988	4.498769260493808
E2f2	0.361075499885673	0.3539058216827149	0.2445490483471822	0.3042401414653904	0.1831385618522072	0.4294370316537264
E2f4	13.108001631420684	14.008585299236163	12.618906572784665	13.265442737827295	13.574638698810752	11.914405771004192
Cdkn1b	16.870731492951506	15.065644018400432	17.369830281440194	13.93586550106619	16.25657971914844	18.1754259984119
Cdk7	23.4079203244052	22.74012213346812	24.531137519299588	22.866365563437164	21.636586443922837	25.91083765783985
Atf6b	33.69352684389343	35.62280508860083	34.619498005858645	38.107788735797854	38.03466971834331	35.47641896078403
Orc4	5.1655790522476295	4.552762880257753	6.269116273278187	5.624752695462612	5.376233655101888	6.214349947055231
Ccng2	19.913842486043926	18.44997878479064	21.37912096101603	20.261052200415282	22.120953413222423	23.151378785871803
LOC100362927	0.1152224899279566	1e-08	0.702340454214395	0.4660118452821926	0.22792061650219939	0.6390107479495112
Creb3	61.31096886912245	63.98598522838864	63.674187750805764	70.31793364343689	72.6403584453504	69.80193026081182
E2f3	0.9505854694056425	0.950619945596428	1.1231873076920678	1.066556859202399	1.1694497886005708	1.2033319191257028
Rb1	2.4349760485294802	2.089333696899633	2.3799974592216415	2.537193073307271	2.6896938506045847	2.8998276952478252
Tp53	39.50341128406762	35.939405464852236	37.07621340535638	44.760803150360324	46.297627485826496	42.42578257351217
Myt1	1e-08	1e-08	1e-08	1e-08	1e-08	0.0033458290646305997
Creb3l4	1e-08	1e-08	1e-08	0.0148060446553015	1e-08	1e-08
Creb3l1	25.020482548368438	24.737628491881825	24.474053344044442	40.91053845739372	45.362618623942936	40.66576177117263
Gadd45a	41.266081038575784	42.464321000404574	45.61159810809478	97.87732441937403	103.48309549641492	106.89965283300532
