# Supplementary material for: Peptide-based Self-adaptive Implant Coating Sequentially Regulates Bone Regeneration to Enhance Interfacial Osseointegration
Source: Research Square preprint supplement (doi:10.21203/rs.3.rs-5132912/v1), 2024-10-01
Supplement: Supplementary file 473 [file 4_Metapathway biotransformation(WP1286).heatmap-data.xls]

id	S1	S2	S3	C1	C2	C3
Sult1a1	56.96358574766197	55.940946808763286	55.76065008062465	2.217519238074885	0.8830055400267588	1.3699209437412396
Fmo2	4.108763950911395	4.161069084891217	4.090689129246234	0.2492655126227445	0.3947648284508844	0.3551179799336311
Fmo3	2.40639781519826	2.1795036330388187	2.780619771006292	0.1857359140932711	0.054504685682159	0.0092613617630738
Gstp1	500.321704418056	516.810635737434	494.17870100634735	106.72428525443492	104.0905111195828	101.34004741539319
Cyp26b1	2.9714864728541537	3.1311497328908082	3.0769457780764045	0.6945624849376241	0.5970518141537836	0.89206155366698
Gstm1	45.53356173657048	47.60950914159571	41.930834386865364	17.383676510575278	16.833479050644716	16.562118897759337
Chst3	0.1908662670548045	0.20023265174292	0.1097573950084092	0.025488908291005002	0.0106854133390574	0.043575550401894
Akr1b1	328.3827770375377	349.46395959772354	317.13647742881807	174.1157166420906	169.33624446396104	158.58928494894585
Fmo4	10.702848509314192	10.271740531132801	12.176528477631841	5.21632530999286	5.4740637716613785	6.1999373982090535
Gsr	31.639221044314738	32.404927902106515	31.349725024476232	17.13424760016886	18.089473346522333	16.880811046501314
Akr7a3	0.4439666279724079	0.2644814067664575	0.1653792364736082	0.0748167538675707	0.029273562897626202	0.0746117751412639
Gstt3	2.7164583350990688	2.5384444997557747	2.2874538954129866	1.3806672833352938	1.5660452938484712	1.3329414829531325
Cyp46a1	2.1315891549131547	2.269126301412144	1.8976228575351808	1.277613083933459	0.9780491091318281	1.3405881985242412
Gss	34.939512042608754	37.94958637422828	36.38249310677115	22.300517309841652	21.59494495130185	23.317919882185667
Akr1d1	0.0069254910252106	1e-08	0.0070357398082313	1e-08	1e-08	1e-08
Ndst3	1.7566759048866682	1.7111777917946196	2.0395896541088847	1.026164826138751	1.2446735184900932	1.33222005591384
Gstk1	15.442317156866364	17.245510632799856	15.366339812473305	10.889714702697928	11.513611450671727	9.475777362165873
Fmo1	0.2286173029329181	0.3999310109852946	0.1769575104273509	0.16511282405256988	0.0215345776488285	0.0109773731472204
Hs2st1	25.04500343093745	23.81207320416966	25.82107604860593	16.77147025236518	16.79637806839665	16.49502258507589
Ephx1	45.319731234279345	45.19775983300025	45.16997640846202	29.85443993719645	31.594232956250934	31.69423714606367
Chst11	20.70497194953241	20.88567754254359	20.631504819405503	14.266256076895333	14.083279823553907	14.42226590739285
Akr1c1	0.0763198153995007	0.151551710179544	0.0969184637241862	0.0771679649963663	1e-08	0.0384782772767195
Chst1	0.8825399463338868	1.1099164182965637	1.1024728414690619	0.6345583677061774	0.6918321822906699	0.8305760371937501
Gstm5	57.71216179150389	55.46675787139734	56.18557516785085	40.29845609223954	41.1352242235911	36.660305605650834
Hs3st3b1	1.483560917037658	2.041764308169509	0.7759729201400976	0.7723018821813757	0.5956405404231643	0.9331099264068741
Akr7a2	42.29341159133722	48.47408237555653	38.38383684719526	33.33314480193121	32.68095681403804	26.850639092348104
Fmo5	1.4855312932444755	1.369008279802114	1.2757156123551066	0.8547521340468398	0.9903288705921393	1.1503401533218094
Nat1	5.94566764578024	5.552284507212363	5.958692563943132	4.232591641354393	4.362722925723599	4.601776200049588
Naa20	30.797550326522604	31.109667375792128	28.870221607281042	23.86115249305775	22.771587892173578	22.93593156565286
Gstcd	0.6658506155675668	0.5396130611208261	0.5715118701260021	0.459545540118126	0.4400856374542469	0.4630937039774557
Cyp2f4	0.027726262488518803	1e-08	1e-08	1e-08	1e-08	1e-08
Baat	1e-08	1e-08	0.0140920780810445	1e-08	1e-08	1e-08
Cyp24a1	1e-08	1e-08	0.0074891632423234	1e-08	1e-08	1e-08
Hs3st3a1	0.0479397156693674	0.0456147832645597	0.0142050143445588	0.0080787540653358	0.025682897644281503	0.0261839937175348
Nat2	0.8755713129800793	0.8380599471394355	0.7295260180965961	0.5445560387887035	0.5202110590985456	0.8701728708121872
Nat10	9.965758617131964	10.466139939360477	10.464471988164103	9.019574131812702	8.305789820239193	8.781686335753527
Sult1b1	0.0855427109580747	0.0169866122329131	0.06952359443451739	1e-08	0.0169211388425585	0.0690051107086834
Gstm7	7.089756423830128	6.436418892801024	5.610881052551473	6.019994090593286	5.578682051036465	4.956837872817468
Tpmt	5.401053756622969	5.512710388668253	5.113916369436064	4.336094508602277	4.7222300759674445	4.825257230084661
Akr1b10	0.5632412417560401	0.09868709834569299	0.28049394906649977	0.2233335737837933	0.2075363924831711	0.23385778133829
Mgst1	51.87658773490025	57.53424392368	55.479048761836644	49.45046317094978	46.5257799760386	48.6260027746506
Comt	39.088275272633204	45.01922974250352	39.320158368195855	38.11592816726717	36.956427171189034	33.98989691330171
Akr1a1	460.671539943115	497.2681060886449	441.51504359507084	430.2759250910437	419.78172679746126	395.1793259993877
Hs6st3	0.0124885224605459	0.0123995128957551	1e-08	0.0126273085430499	1e-08	1e-08
Naa50	7.936720004386011	8.04138324073327	8.846689878798248	7.429722778640718	7.463313024791295	7.588461061315519
Gsto1	37.64005338831383	38.39298650302365	42.06318219626341	36.79711499758453	36.0373128192774	35.43851973402807
Cyp11b1	0.2696153650439725	0.09517999983948079	0.1278234827988875	0.12116072881387979	0.1422197001908967	0.1570774102973977
Sult4a1	0.0098046558075342	0.0194695400127136	1e-08	1e-08	1e-08	0.019772900140956003
Gstm4	8.724759852552545	10.708853470305307	10.236238399082136	10.129926645841307	8.572564630310662	9.270908699893225
Ephx2	2.124228391782495	2.132013219753989	2.193230122180471	1.7742986066448767	1.9411034688382098	2.37477135491551
Chst10	1.1556026055303206	0.8008462527109679	1.1030862956233292	1.0821838977143547	0.9358332110508748	0.8915287333387845
Sult6b2	0.0300866931323952	0.074680624645336	0.0152828309748049	1e-08	0.059514221735961804	0.045506550365701004
Chst13	0.5650797565849819	0.6568416628154164	0.5180680704951641	0.4180679617629099	0.6406784668979899	0.6253838388906874
Cyp1b1	83.85870859884001	79.23995443960555	84.06546499133611	78.4142971896172	80.32492930095164	85.10490384684269
Nat9	22.961684790966356	20.84160297084143	21.325379319689247	21.40561586206977	21.920938383408153	21.05139652413489
Gpx2	0.3751005189139817	0.09310677233802679	0.5001568065358452	0.3792690482197647	0.3941785440670464	0.1891149790709264
Kcnab2	1.5453392300999904	1.0678453179528657	1.1846433291859104	1.3621905940196488	1.3044681572908274	1.1529774182551524
LOC120093683	0.0802233238200511	0.0459528197934944	0.0501541100038426	0.07487525014893709	0.085447962164038	0.024890043719264402
Chst5	1.7641761580172288	2.068156952598271	1.965008609196782	2.138388811385506	2.112741170654533	1.6824484304206018
Zfp628	1.5910011654470044	1.9122219331814962	1.6752233546332462	1.8952489732612052	2.0704906937276446	1.4548888362583785
Ndst1	10.555613025845958	10.357984751563727	9.822441910507564	10.719354476416186	11.491871694678592	10.32926618129201
Inmt	0.06688763605987309	1e-08	1e-08	0.0225436616361795	0.0882065724033935	1e-08
Gstz1	8.609145216048631	10.084191578734918	9.819196632763465	10.927590815553906	9.972442719108361	9.795503118172581
Cyp4f17	2.886623311000738	2.55196182842496	2.5951291847604527	3.23856046599104	2.667276306082979	2.9186806824598643
Hs3st5	0.1008904902122373	0.1541098591665144	0.2759523559528043	0.2746468573670248	0.11513689455310219	0.2817199491764538
Chst12	19.003737163062485	19.790018423234322	16.465801558932213	21.556056693320762	21.37725505959496	18.710758530296303
Cyp2r1	0.0609067483793602	0.0633522962307372	0.1119667037953252	0.0762463731771421	0.09753071049184629	0.105282657529074
Chst14	14.957087236799625	15.878593747409608	16.200414031904486	18.776167100730298	19.162939982634633	15.65034343865929
Naa30	3.611854326258761	3.0186887976199905	3.2141670052356384	3.8646409289906414	3.549679720312662	3.9047640231083567
Gal3st4	1.2757244959288783	1.24744061152887	1.1585750733846842	1.4364814922573588	1.1470453480294363	1.6566857339529628
Kcnab3	0.039414441336154904	0.0146750770975978	0.0550575968409848	0.0747233496929545	0.0682196921584298	0.019871641165380302
Cyp4f18	0.0524849806701601	0.0297776635659933	0.030468863976368603	0.0379058966966792	0.022247168630241603	0.1663289607898981
Naa40	0.9864300388447816	1.1032760489840698	0.9427182927290696	1.1984477036336711	1.3535342852599124	1.218753031902418
Cyp27b1	0.1580364585916358	0.0432855473815452	0.1107257186966307	0.2314239542071694	0.1239662639278073	0.1483649468977032
Ndst4	1e-08	1e-08	1e-08	1e-08	0.0030280475378976998	1e-08
Cyp21a1	1e-08	1e-08	1e-08	1e-08	0.0042479407669328	1e-08
Gal3st3	1e-08	1e-08	1e-08	1e-08	1e-08	0.0106588335916091
Mgst3	6.742804274128404	6.1965325140794745	5.989894209068197	7.895891601215947	8.747170253317192	8.348611823422488
Hs6st1	19.58006623852671	21.964765581915202	20.343352077715924	28.92365989199055	28.120839744075024	25.357068031269122
Cyp4f39	0.1483597820876885	0.3240652135010896	0.2773276716189922	0.38402179305961137	0.3697712044963314	0.3530501668589131
Cyp2u1	4.140453714952147	4.274446826427596	4.750087533696648	5.90505925772958	6.032126061632074	5.930393662559478
Cyp2s1	0.0755286212446414	0.3124595726043564	0.0639424879753934	0.5282117902027326	0.3299305370758513	0.4315662007160828
Cyp51	35.32915816600301	33.948590776696726	36.32169887669013	66.63149481338355	64.60343555705276	65.5555768631243
Cyp7b1	1.4434658788589207	1.2640450549185733	1.4300114275130082	2.6198608478920655	2.8907772139761163	3.3178363213176967
Sult2b1	1e-08	1e-08	1e-08	0.0137752447742362	0.0269491956364798	0.0274749983143894
