# Supplementary material for: Peptide-based Self-adaptive Implant Coating Sequentially Regulates Bone Regeneration to Enhance Interfacial Osseointegration
Source: Research Square preprint supplement (doi:10.21203/rs.3.rs-5132912/v1), 2024-10-01

SRP-dependent cotranslational protein targeting to membrane(R-HSA-1799339)

Heatmap of the Analyzed GeneSet

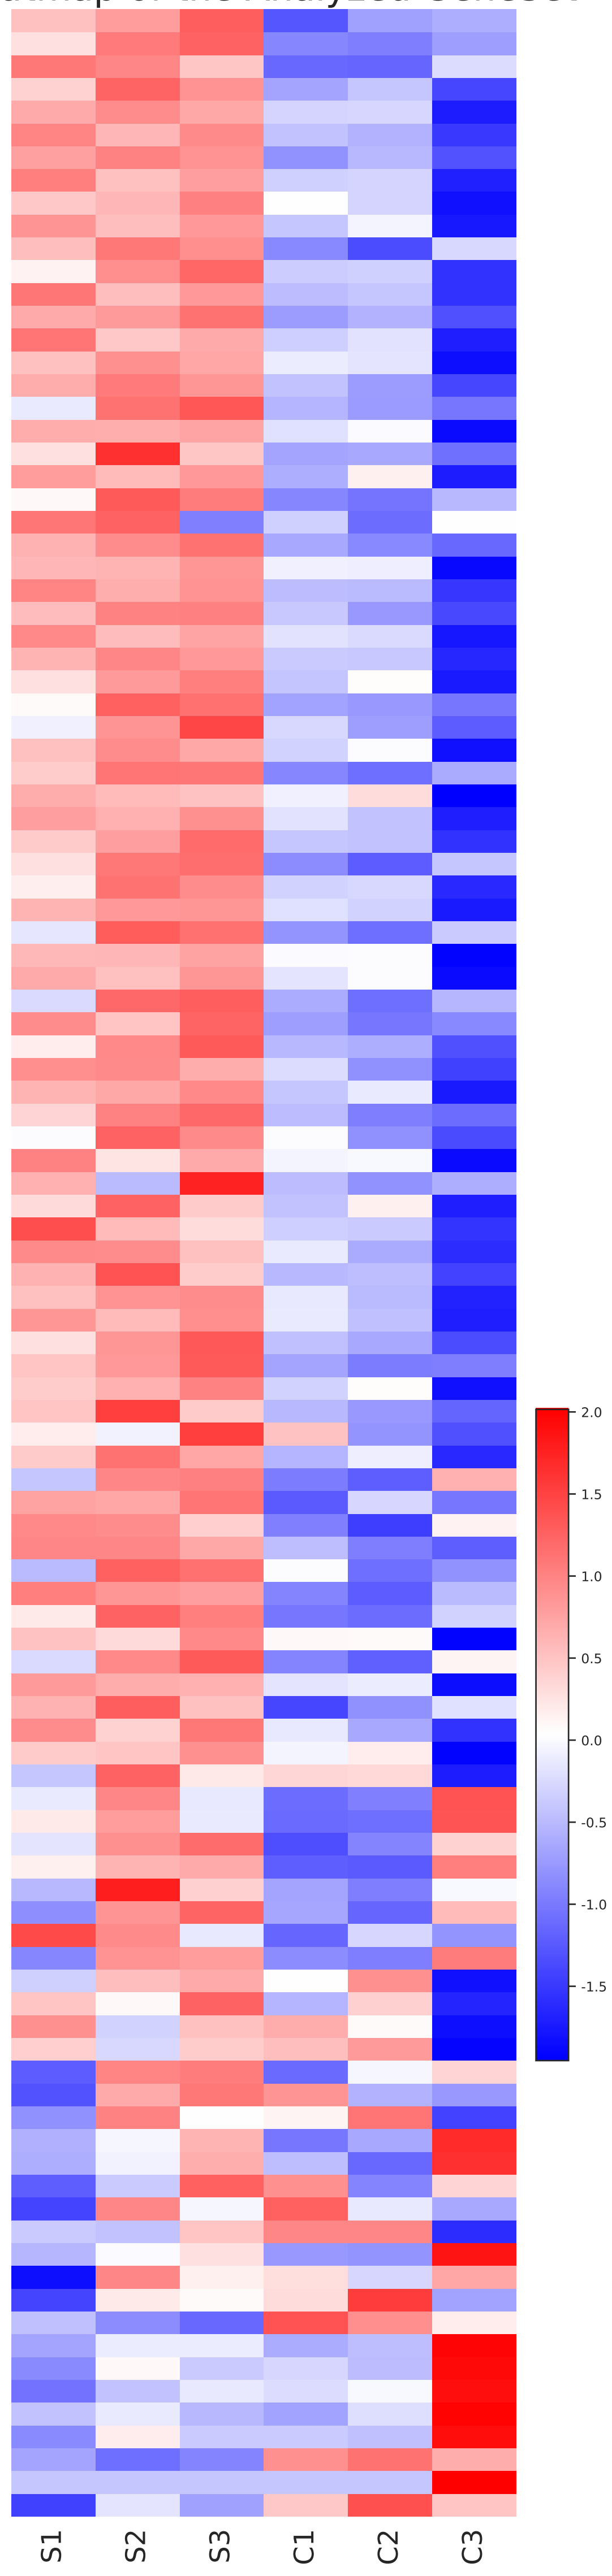

Supplement: Supplementary file 474 [file 6_SRP-dependent cotranslational protein targeting to membrane(R-HSA-1799339).heatmap.pdf › Source data/1.RNA-Seq source data/2.HUVECs/result/1.6.GSEA/S-vs-C/rct/6_SRP-dependent cotranslational protein targeting to membrane(R-HSA-1799339).heatmap.pdf]
