# Supplementary material for: Peptide-based Self-adaptive Implant Coating Sequentially Regulates Bone Regeneration to Enhance Interfacial Osseointegration
Source: Research Square preprint supplement (doi:10.21203/rs.3.rs-5132912/v1), 2024-10-01
Supplement: Supplementary file 477 [file 5_Thick ascending limb transporters(WP3882).heatmap-data.xls]

id	S1	S2	S3	C1	C2	C3
Car4	0.09249305541091829	0.061222555547791005	0.0939654795872774	1e-08	0.0152466521341803	1e-08
Aqp1	1051.271442294624	1095.0354090747007	1035.9853450947853	338.80123781908605	332.3619237623174	325.7258498303618
Clcnkb	0.9840431597981597	0.9871542327860888	1.320858290503331	0.3608731931683	0.3429115684907122	0.3753081137252209
Slc9a3	0.0034356193478228	0.0034111326770678	0.0069806136605754	1e-08	1e-08	1e-08
Atp1b1	30.97622740891614	31.267685187816934	29.20905746500118	13.91054848397049	14.584953101436477	14.479356266556135
Clcnka	0.036316297768704105	0.06310054774250859	0.046118031883326305	1e-08	0.0269388623597787	1e-08
Kcnj16	0.1321128255603074	0.1669451811209357	0.1403166939791756	0.0242874642608396	0.11878693527568339	0.06660752034675349
Slc12a1	1e-08	0.024994117474326703	1e-08	0.010181323220337	1e-08	0.0050767195141833
Kcnk13	0.08802313128325309	0.06554682456417779	0.0372601714224644	0.15575233924103948	0.00725491778132	0.0443787550654358
Atp1a1	167.4993088602869	172.2669075775034	165.77948423744982	177.83503793082298	173.58669399106157	166.7560638834784
Slc9a2	0.0053728758101191	1e-08	1e-08	1e-08	0.021256050225188103	1e-08
Kcnq1	0.0021362622216883997	1e-08	1e-08	0.0129599656320584	1e-08	0.002154084778528
Kcnk12	2.4197478927502005	2.378442200544361	2.736098642567087	3.031171948681464	3.5162501650715963	2.8483368687261463
Slc12a7	5.243398860191371	5.28625014971272	4.605388082645414	7.275283379191363	7.823104663675977	7.002357048832416
Car2	0.0643867390963836	1e-08	0.016352940125318103	0.13020454045613938	0.2069646259995329	0.0649239116864839
Slc4a7	4.460062818421128	3.741231951101157	3.874121014402871	7.173852571554106	7.731565231659937	7.949447493555187
