# Supplementary material for: Peptide-based Self-adaptive Implant Coating Sequentially Regulates Bone Regeneration to Enhance Interfacial Osseointegration
Source: Research Square preprint supplement (doi:10.21203/rs.3.rs-5132912/v1), 2024-10-01
Supplement: Supplementary file 481 [file 6_Retinol metabolism(WP1297).heatmap-data.xls]

id	S1	S2	S3	C1	C2	C3
Sult1a1	56.96358574766197	55.940946808763286	55.76065008062465	2.217519238074885	0.8830055400267588	1.3699209437412396
RGD1565355	2.201596980378483	2.071781924758409	2.8923680417469955	0.107280180444911	0.0349796101764017	0.1604793853598507
Cd36	1.2937662940795247	0.9501074093837608	0.9488294785256545	0.11610746896034259	0.0075715723401555	0.1543858156592593
Cyp26b1	2.9714864728541537	3.1311497328908082	3.0769457780764045	0.6945624849376241	0.5970518141537836	0.89206155366698
Retsat	90.11764451343791	89.61475683710373	87.09135095314164	42.04902668739871	44.72935760193089	41.0714639566563
Adh1	0.3277715994960561	0.3905225596736176	0.3729482303774112	0.0132565759123048	0.0389017414254169	0.1850834584124377
Rarb	0.07193384177274459	0.0547562147876547	0.07551494333110209	0.043639953764780505	0.014229180016061299	0.0459381904616592
Rdh10	3.463357621620668	3.3754332138938166	3.947181645709279	2.495568601682253	2.3859815911649633	2.336196233925521
Rxra	18.79778084194445	19.83081936786868	18.99319305693631	13.245254924339436	14.535687930821314	13.020021414794952
Rxrg	0.1715813116318485	0.0801686629935269	0.11279061629061089	0.0816414696338368	0.059894747386447504	1e-08
Adh5	41.60333182441992	44.57813497728564	42.074851257293574	34.43619992712846	34.613285339565266	30.090005020394663
Bco1	0.19744507422548818	0.33929622137454457	0.1080090680502894	0.1535686952958476	0.0751085485442623	0.1531479564092653
Rlbp1	0.0410723770862013	1e-08	1e-08	0.0103822120978415	1e-08	1e-08
Rxrb	7.652824094818017	7.758704343044134	8.558085855487423	8.227985340547734	7.496354002642749	8.04992444757359
Rdh12	0.0565787904664159	1e-08	1e-08	0.0143018965218773	1e-08	0.0855762280831701
Dhrs3	36.00583640607943	36.51954562608044	36.02435402031467	39.224312328920604	40.736659382101244	38.98162902102153
Npc1l1	1e-08	0.0052605733229697	1e-08	1e-08	0.0052402969362499	0.0053425396140533
Rara	9.315737512175296	10.164551338553556	8.100326466606022	10.81147458854687	11.45301048673552	9.550305948081785
Rbp7	1e-08	1e-08	1e-08	1e-08	1e-08	0.1557961916979084
Crabp2	26.1012498818148	26.09793403750191	27.35807082372173	31.756412743841445	34.915916471313786	35.009541207890486
Scarb1	7.715161165497477	6.488950309667205	5.537809091084192	9.599628503992529	10.105197538983715	8.72918683568745
Lpl	32.05270047920999	33.328980160459125	34.84069725215304	49.39139288669232	51.21857662718624	54.55742241774863
Rbp4	10.534908420781989	11.440431195144448	11.603077289859575	17.949617105586604	16.155244175962714	19.151683040912673
Aldh1a3	1e-08	1e-08	1e-08	0.0129623045520425	0.0126794048663243	0.0452437441408855
Sult2b1	1e-08	1e-08	1e-08	0.0137752447742362	0.0269491956364798	0.0274749983143894
