# Supplementary material for: Peptide-based Self-adaptive Implant Coating Sequentially Regulates Bone Regeneration to Enhance Interfacial Osseointegration
Source: Research Square preprint supplement (doi:10.21203/rs.3.rs-5132912/v1), 2024-10-01
Supplement: Supplementary file 485 [file 75_Toll like receptor signaling pathway(WP1309).heatmap-data.xls]

id	S1	S2	S3	C1	C2	C3
Spp1	1161.7405365134805	1169.2708993871843	1165.5576979850223	202.34258870094072	202.2785386289191	209.57615809568364
Tlr7	1.4421128040109863	1.7687366236941775	1.998312692382728	0.3752564055740227	0.34084746872739907	0.6522264567342017
Map2k6	0.22134924565490088	0.2197716198812422	0.2186264985749171	0.0839284269067529	0.0699342314121426	0.1146979195394138
Tlr5	4.787512079558744	4.659384839450804	4.579346399900142	1.9146426903383895	1.880998819277236	2.40750063764579
Pik3r1	16.383475819057892	15.501270229910459	16.875801974644048	7.005672301545564	7.250801604137134	8.172077605732419
Nfkbia	14.182739478986589	16.213418968863294	15.13048073230388	8.286217159675273	8.225008486983109	7.562183511418527
Ikbke	9.063258601662382	8.889869788193844	9.790630445410217	4.9433786969220845	6.197891068624789	5.961049276112088
Cd14	23.13005080141023	26.575908477354186	26.078999226001468	17.019858716587756	17.983978300580095	17.215895948636987
Ifnar1	17.095251632223828	16.22836651731284	16.788713815602414	11.625802076382307	11.98942173263482	12.137363037762395
Ly96	24.31990580389957	24.29522979226056	28.857500249067332	17.75596654016097	17.791550497373926	19.75627877983495
Ikbkg	4.84920853755794	4.49047552344489	4.707196828921799	3.665841042859008	3.2179848177390573	3.177709719613544
Irf7	8.793480527012537	9.28975710675812	8.087017733034008	6.204488897543672	6.826319715656638	5.733362466884572
Cxcl10	0.8352105787899504	0.2487773379402304	0.4242532765668964	0.06333693602545669	0.3097730565357274	0.2737080725993457
Rac1	314.18486117310005	300.69546008230236	316.63515813440154	242.0435022918744	248.6773534130673	238.12457893963392
Jun	20.180822618803965	19.29234408498486	18.496194628591486	14.61707348545869	15.940556545850256	16.22842065300743
Fos	2.5928321149615767	1.9085714488013719	2.2102287018150295	2.0039022246027764	1.7243578144164984	1.7880528838699374
Tlr3	6.642980383558762	4.999479577568478	6.217248553315816	4.859902838350559	4.942480655730406	4.901537925287085
Map2k3	38.74617757850106	39.81456566160728	38.74698022721322	34.47637304411815	32.99428020293699	29.86763413773977
Mapk3	90.68227442303372	100.31036398697587	85.37399712077665	79.47662132913044	81.85347769599866	72.78668334012438
Akt3	4.742749177237127	5.063635765194547	5.086933532029528	4.2546449492524365	3.984150811970837	4.430061904258992
Cd80	3.713666066717528	3.208433570233419	3.970198185194001	2.743432222821805	3.196066940342658	3.403566487933402
Nfkb1	14.957286209322818	15.889074808340112	16.81443894458752	13.333081618706421	14.262562076130212	13.38024868931767
Tlr1	0.0060173466264789996	0.0238978066865075	0.10392319262867379	0.0182526336627364	1e-08	0.0364052422925608
Irak4	6.960926059955074	6.959403995308693	7.029561732484812	5.932867226804209	6.2276874762395975	5.881727001381463
Map2k7	10.043511501020252	9.63887758104423	10.44394873639393	8.539084376752077	8.736529241447121	9.059526337374805
Fadd	5.5876172580016465	6.371722133553286	5.283142673897767	5.733619633496077	4.623579860185827	5.550557491537019
Map2k4	6.545038975778897	6.224911064085666	6.942383874657368	6.180126222730732	5.691741911158737	6.417789729504483
Map3k7	11.827166636448508	11.048326984497356	11.776247199526336	10.502593159808812	10.222751614197712	11.543909947406107
Mapk1	15.253876836690662	15.382008646431204	16.54507058531675	14.759410907995575	14.620207773677492	14.694649485138859
Nfkb2	8.226824112581014	8.479160603962853	8.241119713061964	7.5159818983542	7.852746739680691	8.227032737745718
Tlr4	2.4450720754571407	2.7372580057338647	2.4983958778171287	2.4077510727480425	2.2780975117607967	2.601250654613716
Irf3	10.97283349484651	11.41068791385367	12.027580117171512	10.942952439879233	11.309587275814625	11.14590584261496
Mapk14	25.36185508163248	25.973621599907055	25.642937088349232	25.8743005520766	25.31623295217376	24.20042114771716
Akt2	30.384696455702535	33.62236225131937	32.127570817132394	31.39860405985961	33.08010093665678	31.034163384849855
Rela	24.065276760249372	23.077121747566398	21.341950490318233	22.385707893155132	23.79208909982389	21.875547530616437
Cxcl11	0.022465114008724002	1e-08	1e-08	1e-08	1e-08	0.022652538316133203
Ikbkb	9.878555873670317	9.5333369327505	9.841660325915461	10.088287254353101	9.535698955555732	9.7283940354326
Pik3r2	19.532663833307623	20.95827346985304	18.37146464057553	19.5986826937952	21.12867162822361	18.799340405466985
Mapk9	10.23249110572806	10.210942603663616	10.524431321739188	10.46512770377505	10.427503613191798	10.488638212413484
Chuk	6.866797484197616	6.942124771086577	7.715915167652075	7.155946525810325	7.590585855054838	7.165024106987115
Tab2	11.32648266815755	11.106427314948482	11.13147593889168	11.739025830575981	11.924688708500868	11.984086138156572
Mapk10	0.0228428348864892	0.029160031694207	0.0430977336475274	0.0263962151131451	0.0548677497199168	0.026323896268141602
Irf5	2.765229232342503	3.160599272689284	2.9371754967119537	3.086250376049633	3.1235086535756906	3.2250820514177483
Pik3ca	7.066312384567878	6.579668634713721	7.182432427650098	7.058149316806675	7.292771667296387	7.9213649609059456
Tab1	5.299374496339478	5.505620609427176	5.235488983021138	5.505813454266771	5.856609619878646	5.963132974906727
Ripk1	8.33214189597023	8.36209471300941	8.112846177672216	8.92057821858408	8.267567752168278	9.635592738712575
Pik3cg	0.6500034919991295	0.4324649136006412	0.39484910931566297	0.5352673893610271	0.5368406008493507	0.5506933267918959
Tlr6	1.6130712816007717	1.6606731006960402	1.5782797525700176	1.9740486365309768	1.7720139712238308	1.6985524110037364
Tollip	15.617807016431472	15.506493983032133	14.228685767703285	17.458133884887875	16.87331486166478	16.725868548859644
Map2k1	44.78033666227869	47.639303452254495	47.620307915801284	55.14271123091328	50.43724744694714	52.250342798556254
Mapk11	0.49784527692590197	0.9972658201772242	0.5590096350474403	1.368834571354301	0.5874147195650563	0.7750156154511224
Traf3	2.9326546457093006	3.2988643199290877	3.2600528655091168	3.597716971696015	3.6298535050378473	3.861351154424175
Il1b	0.1261396883686192	1e-08	0.018306829036790703	0.018220221596364203	0.14258048073425258	0.1635326459260579
Ccl5	0.2432693897109085	0.2415355321611484	1e-08	0.409954770918196	0.1203022821820256	0.3270652818521159
Traf6	2.2052351710961866	1.9576156093759487	2.040035375346539	2.2420103514683776	2.2800820189362994	2.8506549979234634
Ticam2	0.2285680425810688	0.1418368576039322	0.07982105445181689	0.1227762050647315	0.32496735438390517	0.2520819917744061
Cd86	1e-08	0.1753502523361347	1e-08	0.1913267923997548	0.0873371949902541	0.12720174066171788
Akt1	61.57859818639162	63.3092303899666	59.0859707101178	80.96951892952251	76.30325699048791	72.16469118200062
Il12a	1e-08	1e-08	1e-08	1e-08	0.0418343121045033	1e-08
Il12b	1e-08	1e-08	1e-08	1e-08	1e-08	0.1493986167748421
Map2k2	35.87197454734145	40.366143081387946	36.841650739806425	51.92634889593364	50.49454657605205	44.29722847678789
Tnf	0.070178491402475	0.0278713288978681	1e-08	0.0851500682250953	0.1388194665388322	0.056611189241741404
Mapk8	2.6659496772435154	2.675410426577563	3.4489325277603538	3.830120415534581	3.97334561948756	4.666138763905404
Map3k8	0.4398062982189852	0.3540581047342135	0.5977562502660541	0.7091064980621166	0.693630379863433	0.773085769295024
Mapk13	0.2260264646183864	0.17798471121069478	0.1662799193157352	0.2679414758588446	0.3623059971463945	0.3379387487570085
Cd40	0.4392249946157606	0.4625244687758922	0.7031300443709035	1.076620944800344	1.0531238916459131	0.8186743526405128
Pik3cd	1.9560092775532383	1.958118333142459	1.7900750831274208	3.2117950974844507	3.6613175664738877	2.87291590279214
Ccl3	1.1619285592469741	0.6235930468793576	0.7656815022337302	2.635454541992944	2.2673415076410772	1.4566116583811741
Lbp	10.158293860362681	12.782265489875087	11.535441067529034	22.57582491714448	21.44428401733736	21.64805090033573
Mapk12	0.4785895931267326	0.178191956617118	0.316035465064638	0.9073278790357244	0.6745194704000792	0.9531002741592485
Pik3r3	5.6630445400355	4.95810393301635	5.538457950367612	10.476848710488392	11.306549137355438	10.949904437798812
Tlr2	1.167378749002209	1.4873467078791947	1.4807394247329988	7.307265458359606	6.560479348470582	7.7431235192170655
Ccl4	0.036881972033014104	0.1830954733204967	0.112407300721229	1.6408407477809916	1.3496840688313656	1.3760176101130297
Pik3r5	0.17120536662389088	0.14422981055430528	0.1159538935923634	1.043893579125089	0.9903235348451996	0.889325168563707
Il6	2.7416885981804846	1.3048311434357924	1.5883311629087737	24.74322171395451	22.43278580944411	26.091984175764107
