# Supplementary material for: Peptide-based Self-adaptive Implant Coating Sequentially Regulates Bone Regeneration to Enhance Interfacial Osseointegration
Source: Research Square preprint supplement (doi:10.21203/rs.3.rs-5132912/v1), 2024-10-01
Supplement: Supplementary file 489 [file 76_Spinal cord injury(WP2433).heatmap-data.xls]

id	S1	S2	S3	C1	C2	C3
Ccnd1	235.5723156204571	230.54435733474	240.2908752556232	78.22491203950719	78.42743659374106	79.86520360317166
Egr1	31.346389865477263	29.5747171533933	30.49960532012929	11.136405363178056	12.36826328030142	11.907350764002224
Zfp36	37.275871987598684	39.56754635488803	34.707969993477825	14.885681484524072	17.6384875427939	14.581223598512501
Necab3	0.4168001878114811	0.2167678493913408	0.2822902388355426	0.0301023042635657	0.0785208559953092	0.090059475048969
Btg2	14.51336686244193	13.03799608543527	14.448375319369195	7.593944064013693	6.507816454093169	7.601573414467637
Rock2	39.721384955430025	36.09248491797861	43.57098162097881	20.9143591680392	22.252771142465054	26.56340610148804
Plxna2	1.4948312460185904	1.1500068022444403	1.4384519000842313	0.8284775501706494	0.7736643430261774	0.8028024158332645
Cdk1	15.272179921277324	17.267849429080112	15.51530227525721	9.598524579023922	9.299448489796799	10.028917301520467
Anxa1	376.73565673419887	382.1649941795588	402.3250159005025	234.15497377769	235.81783786798562	268.5453523514573
Chst11	20.70497194953241	20.88567754254359	20.631504819405503	14.266256076895333	14.083279823553907	14.42226590739285
Ccng1	221.6112544195417	208.15941161000023	233.60885266067268	148.4843325047491	148.15822945959954	160.41856136988375
Gdnf	1.364535700434259	1.2930407617902357	0.9733301920832437	0.6667850735806623	0.8942560312552141	0.9409786560275013
Vcan	166.28550469835463	153.58321041632627	166.4042159267647	110.39776765583255	110.45180386668396	120.31122999444999
Vim	4182.501729840396	4360.834195791314	4157.350475918131	3017.0243544537757	3025.1772023953376	2912.0323859269724
Tacr1	0.034637546022813104	0.041268806062642	0.0070377982429323995	0.0070045032819258	0.013703253018198299	1e-08
Casp3	17.781763382308625	15.987098274989131	20.394406860755527	13.01954661222615	11.912954917469607	14.042574722078397
Slit3	39.38037871485903	38.49504451099636	35.131614994824574	27.26373844324667	28.192510378354978	26.662034533877073
C5	0.0129625389918951	0.0085801039745809	0.0263377766580398	0.0043688709557705	0.0085470327438324	0.0087137927902206
Acan	0.0183837208891266	1e-08	0.018676376626042702	0.0061960136329251	1e-08	1e-08
Ngfr	0.050749409074208704	0.0719824273005259	0.0147306653670196	0.007330493171348	0.0143410034587268	0.0292416080957801
Cxcl10	0.8352105787899504	0.2487773379402304	0.4242532765668964	0.06333693602545669	0.3097730565357274	0.2737080725993457
Prkca	9.316841770358932	9.24258726021399	9.066203536910672	6.635572306714202	6.949536254440923	7.6485364330296575
Omg	0.07729561269378149	1e-08	1e-08	1e-08	1e-08	1e-08
Ptpra	45.94812685130996	44.56809246148061	45.02088319547141	36.09981242359179	34.68437693340971	37.054250745253604
Slit1	1e-08	0.0047474771830274	0.0291460037976692	1e-08	1e-08	0.0048214487813416996
Xylt1	2.369909998941484	2.09387585349694	1.9330039557954215	1.6889847040121797	1.7657063752536462	1.7659433754246245
Fos	2.5928321149615767	1.9085714488013719	2.2102287018150295	2.0039022246027764	1.7243578144164984	1.7880528838699374
Cd47	27.022809094701383	26.314008964449766	28.147531879065287	22.33947257726304	22.451155033144882	23.149254721602116
Mapk3	90.68227442303372	100.31036398697587	85.37399712077665	79.47662132913044	81.85347769599866	72.78668334012438
Rtn4	55.78363310522987	52.70123583245324	56.29676687465689	46.792279383007745	47.72183011058279	49.27203387031714
Ppp3ca	11.614090024863513	11.622710203394217	12.74455897453206	9.63342334133715	10.718040371135208	11.06123447932259
E2f1	1.8111527332213584	2.038009952455324	1.8399850096903843	1.70919490419286	1.8489643498676527	1.4610104137508622
E2f5	3.0445252778532863	3.543564915352861	2.885059743973069	2.522185216556681	2.6063109324899	3.340801249820613
Sox9	1.3911100871371436	1.387023034963739	1.5802224831782106	1.2107181655961876	1.4745627142135973	1.248831537599936
Ncan	1e-08	0.0090403705038845	1e-08	1e-08	0.0045027676077871	1e-08
Mapk1	15.253876836690662	15.382008646431204	16.54507058531675	14.759410907995575	14.620207773677492	14.694649485138859
Tlr4	2.4450720754571407	2.7372580057338647	2.4983958778171287	2.4077510727480425	2.2780975117607967	2.601250654613716
Pla2g5	0.037139078774269	0.016388617522029802	0.07546060321334509	0.0333793868387907	0.0081627295253053	0.0707368525180334
Fkbp1a	239.76136937337785	241.02586006016617	241.30825201600462	231.12980774935573	235.03248369395592	230.84078279253384
Pla2g6	3.3397622234990547	3.6732547998536567	3.473102064677176	3.25878237987238	3.474892890955393	3.5395081432978754
Gap43	0.0638657406141472	0.015852644855260802	0.0162206170224834	1e-08	1e-08	0.0965978448423646
Rtn4r	0.061120866027865504	0.1456445582107492	0.0620938670323774	0.17304028492344709	0.024180538981002503	0.07395694808530029
Bdnf	1.02045297927263	1.1605515081132753	1.1234035116257985	1.2569119270355096	1.0826764688371404	1.1524425068379522
Tnfsf13b	0.0812488028315517	0.0115242538678195	0.047166990812437304	0.011735969822364	0.0688789579944146	0.0936304603733508
Epha4	0.32670343452634487	0.4572141635574327	0.2117865716768702	0.3743786705094737	0.3262020186358351	0.417276846322233
Grin1	0.016356136842179403	0.0324791131411721	0.0720048644293021	0.033075798216839904	0.016176967622450602	0.13194068609599519
Rgma	4.823970148848929	4.600703025328525	4.65917738293588	5.358467519137924	5.839590820453303	4.19966825967298
Col4a1	280.8203016478587	277.11071736245475	271.15163799988665	306.4159035643247	301.7004711322021	304.2046074555721
Sema6a	0.7822621242138302	0.9072222729536085	0.8581588349703162	1.056822866186008	0.9167287070716936	0.8451304979965489
Gfap	0.028121410980041603	0.0069802527227885	1e-08	0.0568678438185811	0.0069533479804337	0.0070890138138968
Lilrb2	0.0988839947673295	0.0357015399777551	0.1095907171268474	0.109072256185069	0.08890981378929759	0.0997089748053337
Rb1	2.4349760485294802	2.089333696899633	2.3799974592216415	2.537193073307271	2.6896938506045847	2.8998276952478252
Il1b	0.1261396883686192	1e-08	0.018306829036790703	0.018220221596364203	0.14258048073425258	0.1635326459260579
Nox4	0.1552858807506115	0.1598894464172576	0.14607215120927258	0.2791317043905482	0.15358483938759449	0.1565814165631577
Tp53	39.50341128406762	35.939405464852236	37.07621340535638	44.760803150360324	46.297627485826496	42.42578257351217
Fcgr2a	4.526229638868598	4.653486448193169	4.474462427033856	5.450384046173802	5.3807447821982155	5.41310626526512
Mbp	0.13103608982952458	0.11709193994641169	0.0399366345949247	0.2384861442983993	0.0907204838387974	0.132129311855033
Il1r1	17.6219508247689	16.151440409530235	18.141945900350024	21.08771595606635	19.781989990408118	22.446514796114048
Rhoc	108.94338746048865	104.47161480354048	104.29605738314015	129.87250196799997	138.764136106799	133.60918763593793
Nos2	0.0080374233147301	0.0039900740682878	1e-08	0.0040633769446066	0.0119240641334526	0.040522353593354404
Tgfb1	46.52762031674919	47.067321560690544	39.67367879865222	59.105741163966144	61.31975529040857	52.37264547690011
Bcan	1e-08	1e-08	1e-08	1e-08	0.0051663109746527	0.0421368109621962
Nos1	0.0078081615664287	1e-08	1e-08	0.0592119424920593	1e-08	0.023619892781735603
Pla2g2a	0.831285183704471	1.5442225858101961	1.6073096958960797	1.9250695690840407	1.9360990917909087	2.298346569277893
Slit2	16.98560520214901	15.969596983118286	17.12370459048941	23.246844372207953	23.11578387040961	24.8927957097128
Arg1	5.555569339536065	5.592055432462317	6.318696355407256	8.639033735549921	8.741013431858622	8.151757910223532
Ptprz1	0.3280120219495832	0.3163022584749342	0.3044653625235762	0.551171397950053	0.5531458769912234	0.5567997881321353
Tnfsf13	1.1447223002424456	0.8703414240591905	1.0476986256072744	1.6892421711911447	1.9277705666729474	2.09016931918384
Gja1	497.5570241606772	481.1745997603615	504.4738989976749	990.2851133265376	982.6806857467428	1016.4901187532574
Cxcl1	62.27904712707263	55.91370437344116	61.69774748365794	120.06603887177532	121.1605057650627	129.947624751638
Ccl2	134.9051384899577	123.15338886330427	140.0133684370735	309.67225801201914	308.1979697475727	325.9041901470409
Gadd45a	41.266081038575784	42.464321000404574	45.61159810809478	97.87732441937403	103.48309549641492	106.89965283300532
Cxcl2	0.2788196251517538	0.5110751728337344	0.3922037091468971	1.3228467856295119	1.803081166737848	1.2327161297252303
Selp	0.0356922313222717	1e-08	0.06526875945103619	0.3464531863056638	0.2965304222279896	0.2303359988593737
Il1a	0.0368389359046209	1e-08	0.0093563539184531	0.3538590552857489	0.5283130611279104	0.5943403250887148
Ntn1	0.9269632782940388	0.8436601431530772	0.8921556772901946	5.664696331401787	5.782330925767381	5.28431678291699
Il6	2.7416885981804846	1.3048311434357924	1.5883311629087737	24.74322171395451	22.43278580944411	26.091984175764107
Mmp9	0.4997413287227106	0.5434347057568754	0.4109926970792275	5.077011613958169	5.405555238533193	4.535195543410697
