# Supplementary material for: Peptide-based Self-adaptive Implant Coating Sequentially Regulates Bone Regeneration to Enhance Interfacial Osseointegration
Source: Research Square preprint supplement (doi:10.21203/rs.3.rs-5132912/v1), 2024-10-01
Supplement: Supplementary file 493 [file 77_Focal adhesion(WP188).heatmap-data.xls]

id	S1	S2	S3	C1	C2	C3
Ibsp	93.1253753899576	87.260219482956	95.36462949306075	0.271639967105569	0.120777948721511	0.2585823007422866
Itga4	10.066837182827957	10.039945255662804	10.907231371715987	0.6353907783879038	1.113055134919284	1.0560832772206656
Spp1	1161.7405365134805	1169.2708993871843	1165.5576979850223	202.34258870094072	202.2785386289191	209.57615809568364
Itga10	0.4652925353859298	0.5273062220702166	0.5156723607640029	0.0427694070501397	0.0790234953925599	0.0142174166168347
Vegfd	43.67780134032935	42.43345432009559	42.169968798237704	9.786070713980765	9.07996499290008	9.467696449635012
Itga3	204.01503496352584	209.6497028509589	192.87075294459962	58.84891241709825	58.484389207098474	54.03661995027727
Ccnd1	235.5723156204571	230.54435733474	240.2908752556232	78.22491203950719	78.42743659374106	79.86520360317166
Lama5	8.215234430238823	8.156681865014596	7.316325823843252	2.86271479436949	2.6014032072702613	2.5444677413585723
Col6a2	472.0396930516432	486.3997722873854	451.7096240886099	184.5521740895891	187.84442821655404	176.4601133207149
Pxn	20.09801761511155	19.903379675441126	18.863756325765475	8.228569750888036	8.597906292198118	7.6724889315947316
Pgf	16.436895911047134	15.447353076277206	15.898260087681601	6.494648639527832	7.356782849531406	6.171342938638903
Map2k6	0.22134924565490088	0.2197716198812422	0.2186264985749171	0.0839284269067529	0.0699342314121426	0.1146979195394138
Cav2	17.66591155840791	17.53055569585492	19.735089265800905	7.791281653420789	7.903506457249832	8.652446731725364
Pik3r1	16.383475819057892	15.501270229910459	16.875801974644048	7.005672301545564	7.250801604137134	8.172077605732419
Itga6	7.760721427105	7.341424459917703	7.6913997301790715	3.7265647252838128	3.6225718311162574	3.907783473743722
Col11a1	286.6589469035739	272.4645788976701	290.4201070496098	137.30029263542065	136.51216046354577	147.40066171407025
Itgb8	0.4515817444855487	0.4568228615577532	0.4962801535608733	0.2785548534268198	0.176968591748874	0.2749278527659384
Itgb5	267.312944121068	284.15140210602084	255.1154328484184	156.6922848839515	155.722573793677	145.68758142278975
Rock2	39.721384955430025	36.09248491797861	43.57098162097881	20.9143591680392	22.252771142465054	26.56340610148804
Vegfc	17.761759112015138	18.34794566242823	18.52234762930333	12.202208105495075	10.026153621356357	10.009599281225288
Cav1	188.08725269555802	194.21531990550113	196.21853828732696	113.85797578826096	115.615534283891	118.49482897563787
Lamc1	157.60156004804884	154.791120261757	151.54498917594887	95.03490093697488	93.00678525603595	93.90842344646815
Pdgfc	50.11903167523371	47.321031793082106	50.96570130958032	29.212181207072202	30.19818930960064	30.86005183224263
Diaph1	28.601872923823876	28.15944989340516	29.087172553318112	18.2298715298348	17.56100478903532	17.253289934636808
Txk	0.0165813962921534	0.0329264210509128	0.0673814111606247	0.0083828384445457	1e-08	1e-08
Itgb3	7.497756414583288	7.451197686924488	7.201764393749754	4.617311963992778	4.811245929609863	4.835244163608864
Bcar1	39.446047185436846	43.56183513609773	35.83727951300083	28.85412203968723	27.320891537379214	25.070554317684643
Pak6	0.07879608196404349	0.0430289671370831	0.036022712484041104	0.0039835970278906	1e-08	0.035754067172519104
Selenop	113.57221902631504	112.07769582547445	119.40794608785815	78.0364246589948	80.26531988841273	85.2879426092202
Igf1r	14.149888180422776	13.79976667593211	13.97260569422565	9.680846314018504	10.087804851582455	10.050415736818612
Tnr	0.0418175288050326	0.0113235024092566	0.0270347890800997	0.0096096102398742	0.0150398059817618	0.0057499734370726
Met	5.4067305956727765	5.49970241487145	5.558356737668762	3.7189459013863053	4.222243956335764	3.8799830234275183
Thbs4	0.7057153418903226	0.6058009946939452	0.6422675599638312	0.5723330025169028	0.3199096846341024	0.4669895117845021
Mylk2	0.0336338446948793	0.0083485389383351	0.0427115870851261	1e-08	0.0083163602550074	0.016957229350287203
Fyn	17.069757806378995	17.605484554039734	18.19351665680005	12.305411731068364	13.471291463288452	13.956672136557605
Bad	22.533919058512808	25.309810007047858	23.679577797204583	18.369874727343177	18.352014733627094	18.497060953273646
Rac1	314.18486117310005	300.69546008230236	316.63515813440154	242.0435022918744	248.6773534130673	238.12457893963392
Erbb2	4.036398505475146	4.573512218020653	4.040160742964025	3.2383406966049675	3.516822747189228	3.2166020638716266
Pak5	1e-08	1e-08	0.0025977594831903	1e-08	1e-08	1e-08
Jun	20.180822618803965	19.29234408498486	18.496194628591486	14.61707348545869	15.940556545850256	16.22842065300743
Rock1	12.530220790167256	11.158123866874782	14.75353829723005	9.024078416803963	10.247751312433769	12.30360631111817
Lama2	1.9611471426420504	1.5971164996247664	1.5844418522641408	1.3937529388782495	1.4020793918819638	1.4467168127390977
Map2k3	38.74617757850106	39.81456566160728	38.74698022721322	34.47637304411815	32.99428020293699	29.86763413773977
Shc1	100.75947629607876	102.67265380377755	99.631886081142	86.71181347307665	83.94137614285097	83.58139251076193
Akt3	4.742749177237127	5.063635765194547	5.086933532029528	4.2546449492524365	3.984150811970837	4.430061904258992
Dock1	13.412994435793676	12.931937926406208	13.505711084552116	11.592285334568249	10.896507144714645	11.76507409029573
Cdc42	142.17207506890543	134.71662467417949	146.0907312311434	122.16326555783212	117.12324922272208	124.31531994332279
Col5a1	233.7657514937928	228.37470175507042	218.87007335935377	194.7483148572744	196.07963204033481	195.93188714483017
Mapk7	9.212935695356405	9.933744013900572	9.390550201754596	8.2556407126285	8.92519441893144	8.263742603103452
Pak2	35.050914883342585	32.394135702650324	35.24571836132921	29.9845883142554	29.95998630182866	31.766764276797165
Itgb6	0.0380755390455398	0.0850593536836848	0.0531872989161353	0.052935676012834	0.047073059885630104	0.047991497126039104
Itgae	0.8631714046766635	0.8570193100678986	0.864295039993442	0.7220708661045383	0.8045812698141176	0.7889709962302026
Pip5k1c	14.59446225447858	16.757254072532486	13.658856653247884	14.358266022533664	13.8900906668723	12.63178715513781
Crk	33.768104221913795	32.14937667463254	35.10310647426742	30.20658280741325	30.10773669821063	32.42491358462894
Itgal	0.11632891392011879	0.1522497347030374	0.1181807881856959	0.1657396480451768	0.0732165782120174	0.1066358512023424
Mapk1	15.253876836690662	15.382008646431204	16.54507058531675	14.759410907995575	14.620207773677492	14.694649485138859
Egf	0.2414952586859838	0.220437430126674	0.3046960679872369	0.2756859883901275	0.2542595252154409	0.1924514785663791
Braf	1.4083699505320502	1.5688603520889388	1.5333010917556573	1.3914598433589733	1.1997140284719428	1.6863923224865602
Capn1	14.694184190691605	14.574240913207724	13.771008467477651	13.669709830014485	14.34631411340958	12.983348408352125
Tesk2	0.9950846828563	0.8689571729345215	0.9195770207255181	0.8000656456876429	0.9426825235640652	0.9489861063790128
Pdpk1	8.882980910343704	8.249723347937442	8.721272313433227	8.457028140260075	8.253209335362808	8.538504599895747
Mapk14	25.36185508163248	25.973621599907055	25.642937088349232	25.8743005520766	25.31623295217376	24.20042114771716
Hras	17.833924304644963	17.42853688688946	16.0402887807215	17.4443389221126	17.043085607565825	15.983469066829116
Pten	32.94921433768982	32.35011613784587	37.42249590459143	31.52078295400569	33.353217231047516	36.70348943493533
Akt2	30.384696455702535	33.62236225131937	32.127570817132394	31.39860405985961	33.08010093665678	31.034163384849855
Kdr	1e-08	1e-08	0.0040806139379716	0.004061309073388	1e-08	1e-08
Pak3	1.3322387327783958	1.312489622371618	1.592136336475435	1.354875685665266	1.2614663828210544	1.6635714565255317
Pik3r2	19.532663833307623	20.95827346985304	18.37146464057553	19.5986826937952	21.12867162822361	18.799340405466985
Mapk9	10.23249110572806	10.210942603663616	10.524431321739188	10.46512770377505	10.427503613191798	10.488638212413484
Pdgfra	48.33074943760304	43.82106190788543	46.064481232932074	46.536779432363616	46.10728437471621	47.79533270235269
Rap1a	19.5819067816852	20.93425015197452	22.450834664372692	21.396258143057263	20.31399985423797	22.872094869795706
Sos1	5.278687562057684	4.667991397704318	5.2250737210120235	4.772928105850156	5.38971068769525	5.426558602650042
Pelo	27.824709752115673	27.24490206440361	29.975429540111012	31.48474739551457	30.449245295806772	25.586942051682946
Grb2	42.751066826508776	43.96751310799614	43.049509901534456	45.60081989103561	43.81619123592394	44.38431606086827
Lamb1	89.09795448613589	84.54803186323126	84.48711854021862	91.22193627713256	88.0178510407427	88.17582432548326
Rap1b	90.63536032758968	90.88113880116856	99.1033841357576	97.07541583290833	95.49919318901671	98.29217190042884
Itgb1	484.4156195040514	476.8859322410463	509.7265168302234	504.3779692357724	493.541534900076	531.5995562809401
Thbs3	7.145629550124481	7.939307584842322	8.446735430469092	9.229501983891392	7.5648494185961965	7.839246761736923
Arhgap5	6.671244428209728	6.057928572221982	7.98143565715529	7.119274807925936	6.706086833552472	8.151134782421954
Pak4	9.216023889319898	10.425790223607176	7.4514584593152176	9.125704911284936	10.033133715759753	9.685688303871885
Pik3ca	7.066312384567878	6.579668634713721	7.182432427650098	7.058149316806675	7.292771667296387	7.9213649609059456
Rapgef1	6.820906632620035	7.117766972946526	6.859293219634447	7.784996057668854	7.676108304989851	6.808138896553353
Pik3cg	0.6500034919991295	0.4324649136006412	0.39484910931566297	0.5352673893610271	0.5368406008493507	0.5506933267918959
Ptk2	11.310792549013073	10.722656077752449	11.184150854367832	11.471178078736322	11.78406830480799	12.70583661916198
Actb	4024.870591861198	4373.085949730487	3911.985913364068	4588.973979297553	4562.296785633169	4186.84035351396
Lamc2	1.5830710451133299	1.6481319868785296	1.4979908848568912	1.6784104015582642	1.7849318313796172	1.71485914692395
Gsk3b	12.812115293646215	12.582416230124974	12.986687460235611	13.480973494090053	13.71994594824775	14.894510353793144
Tnn	1014.1508803048206	982.1611466041568	974.448209813327	1092.8197025576762	1072.6825983624985	1095.8988449885703
Itga2b	0.1153160146681579	0.1081333372012933	0.1301686258784795	0.0582987714552499	0.1964242826896999	0.1679572302314166
Col4a1	280.8203016478587	277.11071736245475	271.15163799988665	306.4159035643247	301.7004711322021	304.2046074555721
Ilk	132.60321681572017	142.3571037727709	124.0434767779375	148.5255771459197	154.08213123106535	142.22162882779241
Map2k1	44.78033666227869	47.639303452254495	47.620307915801284	55.14271123091328	50.43724744694714	52.250342798556254
Ppp1r12a	17.341296301186897	15.857146653064337	17.601017930724296	18.402418672799747	19.17157232475025	19.989993046407438
Mapk4	1e-08	0.0041251999439115	1e-08	1e-08	0.0164371690230573	1e-08
Cav3	0.0349494116608045	0.3643532257176289	0.017752895767042802	0.3887157862566039	0.0864164023177158	0.3347893325526825
Lamc3	0.018180461186421203	0.0108305340281104	0.0036939842343892	0.0073530069403017	0.0359626056973295	0.01466571322187
Actg1	1004.9900081797816	1030.0562814238456	961.6641816116764	1195.4489166139979	1173.9654500667714	1149.816226584511
LOC100361457	118.94461495838262	112.93088490001708	108.27946144235443	125.7014575093517	137.33782386924267	146.6778156252665
Raf1	22.056806721073112	22.496358092562122	22.123931305127766	27.12835700717631	26.916461635349847	26.292939395318143
Zyx	68.40290772342188	76.6977333001795	67.56895322353677	86.57012076132722	90.31170753544103	79.39071999368782
Col4a2	209.93608247436498	207.3813900577261	199.7695718632213	255.493824362498	248.55416547204678	248.50774206014202
Egfr	5.413647009770682	5.205788259454916	5.866316343185813	6.585559833351068	6.8132873295101275	7.048370953032812
Ccnd2	23.343308466521894	27.58287835264045	23.23857769938655	33.62626384502021	30.67305232479705	27.978884273439746
Pak1	25.93421694709589	26.349699481613392	25.693183215325195	34.16343705599805	31.906725870081583	31.054227926456214
Akt1	61.57859818639162	63.3092303899666	59.0859707101178	80.96951892952251	76.30325699048791	72.16469118200062
Elk1	8.557259683918799	8.683000592218885	8.298616308461467	10.75681351009151	10.683257969779724	10.512416461568712
Blk	1e-08	1e-08	1e-08	1e-08	1e-08	0.0301938321248238
Itgav	36.58197989373636	34.39931705283148	37.02768115467738	46.21076867621637	44.5207865701144	48.55543864559178
Map2k2	35.87197454734145	40.366143081387946	36.841650739806425	51.92634889593364	50.49454657605205	44.29722847678789
Vcl	79.9700779861597	76.76107290576688	81.52967133744303	108.42527317298547	104.18658762658681	108.73146546820055
Flt1	0.0444715967531836	0.021117438743579003	0.0314292573811439	0.0430107789717212	0.0573710102893213	0.044842619132753704
Rac2	1.2130558391018111	1.7675107860543917	1.5684668769365377	2.405286146846986	2.02558184722763	1.7632800484681939
Tnk2	6.369797963851116	6.818813915806552	7.7022043057596745	9.730110295532233	9.895343302839377	9.314309954869461
Tln1	66.6747511270623	66.90751370989992	61.72438099782029	92.91875440737843	91.83808706475988	86.78743681981032
Pdgfa	10.249847721057305	10.371819491037552	9.696442796249134	13.821349616184117	15.003247784680841	13.855506079671821
Src	13.907358164387732	13.97566828767456	12.093084323871652	19.548264281188327	19.396334849918585	17.654262662612435
Mapk8	2.6659496772435154	2.675410426577563	3.4489325277603538	3.830120415534581	3.97334561948756	4.666138763905404
Pdgfb	0.009086049764081	1e-08	1e-08	0.018374037657423303	0.0089865189478514	0.045809228812748404
Vwf	0.0322774876215314	0.032047435864389504	0.019128275534522402	0.0462345989628064	0.0798097645771929	0.0379712366082997
Col4a6	0.1507123529858827	0.2146982519210208	0.07988431125145039	0.22195531490116469	0.3661725825675124	0.2543841103294235
Lama3	0.3250604242687036	0.329096836829592	0.282130037376091	0.5137130756651277	0.4493400285345288	0.4077798008920446
Pdgfrb	94.93086985330655	95.73037239061674	88.34989520342668	139.1384798003671	137.20138555176715	132.2860688660205
Vasp	35.84425491267665	37.164345623820154	36.69848675338338	52.80023982738187	56.50894717347237	52.38148720219385
Col11a2	0.046539423982694	0.0436406277479777	0.0788004911563977	0.0914989760752121	0.1764468455480419	0.0990695736730475
Thbs1	1793.4652608809677	1761.205524283698	1739.8689854464244	2663.625137853067	2646.411324510018	2653.3042840466724
Thbs2	953.6312011264688	953.7870631752196	929.4035356028842	1464.1678572047213	1435.3362665831633	1447.6974977774908
Actn1	128.74223239835587	130.41233796974998	125.54001907293615	199.71067256062952	200.86699987709468	190.85701173122848
Itgam	1.4073236132805402	2.1483382502030226	1.6978010652470932	2.8281396296002983	2.8360113754163905	2.5661421454182114
Shc3	0.0120316256632088	0.0119458725459104	1e-08	0.182479873091636	0.0475992830042703	0.0606599816595641
Comp	0.3059899253388952	0.1250978453724534	0.045714871676820604	0.3184901397289215	0.4450559263455149	0.5263376614716302
Itga11	183.967522116168	187.70752203329306	176.327127604466	301.0586539495953	303.96309850985307	287.5742841952567
Pik3cd	1.9560092775532383	1.958118333142459	1.7900750831274208	3.2117950974844507	3.6613175664738877	2.87291590279214
Hgf	4.777219076338848	3.7774016607605136	4.681930315094095	7.1740793027048815	7.009747909421649	8.475362617797444
Vegfb	6.01698636999538	6.12510555445536	4.867041659148488	9.928311070965153	10.980814071638683	10.581631639508524
Lamb3	0.1086419256915495	0.15896277496736289	0.11037142851545939	0.2196985382370588	0.2205590175841436	0.29405072410418437
Col1a2	1863.5262637035455	1878.7347332412114	1837.64184058136	3599.6595895560467	3596.011754033118	3538.2760564384503
Lama4	38.88455932508241	36.72308581380185	36.41071103349492	73.09809780293972	71.95169353765088	72.55060126744081
Mapk12	0.4785895931267326	0.178191956617118	0.316035465064638	0.9073278790357244	0.6745194704000792	0.9531002741592485
Itga8	2.8360536146556825	2.6112705826358997	2.893514418993658	5.506389812886082	5.36623533387129	5.788681437236912
Itga9	0.1168573554667247	0.0757382032995087	0.136855058172628	0.2970310474124134	0.2809169615160514	0.2585763925856676
Col1a1	2526.782231321241	2495.8319610587514	2367.8312553481283	5956.101136185713	6023.940456224581	5759.444283936097
Hck	0.5295080813461227	0.6400241322458433	0.7250461613316809	1.3850372518459382	1.7191274723399366	1.8571329099672886
Tnc	59.305933419237824	58.16082334036601	56.329824953160184	167.99822282554382	163.84886160209254	163.35851609205423
Reln	0.9137826624626249	0.8919701855092469	0.861013814366046	2.7515578841664445	2.266290425658999	2.6616676645512984
Itgad	1e-08	0.0056242821268784	1e-08	0.1317347551830911	0.11205188712010039	0.06283097011895909
Igf1	2.423217016830136	2.750011328441961	2.7855777978803373	8.127938888705778	8.05812319198946	9.329937816191425
Mylk	4.394222343647686	4.32010179909972	4.928402782400902	17.932045215749408	17.216643767827133	18.158216118757277
Itgb2	2.8256154879372497	3.3781705898655345	2.8112567849725583	12.564968058114014	11.481948602593457	12.037272758044807
Pik3r5	0.17120536662389088	0.14422981055430528	0.1159538935923634	1.043893579125089	0.9903235348451996	0.889325168563707
Fgr	0.13185410521650248	0.0723474026285737	0.0951772265573361	0.8104416434541079	0.8545269351475892	0.9061874506371564
Itgax	0.0565112740219453	0.057585039652287305	0.052878455390152304	0.6510870612680949	0.6868860395536468	0.6238109744268973
