# Supplementary material for: Peptide-based Self-adaptive Implant Coating Sequentially Regulates Bone Regeneration to Enhance Interfacial Osseointegration
Source: Research Square preprint supplement (doi:10.21203/rs.3.rs-5132912/v1), 2024-10-01
Supplement: Supplementary file 497 [file 78_S1P receptor signal transduction(WP1312).heatmap-data.xls]

id	S1	S2	S3	C1	C2	C3
Gnai1	15.41943964998212	15.661614444393768	15.810166904499367	8.41995588023637	8.931969097024508	9.175444905826161
Smpd2	8.955615293498404	9.467403960689344	8.881189960269687	6.432697369335465	6.835525506198293	6.092012174111448
Gnai3	57.98810646257944	55.675052808917144	59.15421771532642	45.72963207795176	44.18980641733882	47.34698757856121
Sphk2	11.23347371948622	12.02639088405687	11.56221802006205	9.67352717347464	10.046202946770409	9.1138339031318
Mapk3	90.68227442303372	100.31036398697587	85.37399712077665	79.47662132913044	81.85347769599866	72.78668334012438
Akt3	4.742749177237127	5.063635765194547	5.086933532029528	4.2546449492524365	3.984150811970837	4.430061904258992
Plcb3	15.340610270499736	16.351003722091587	14.979440459613775	14.276180021203025	14.427331737582184	13.089957608161185
Mapk1	15.253876836690662	15.382008646431204	16.54507058531675	14.759410907995575	14.620207773677492	14.694649485138859
Akt2	30.384696455702535	33.62236225131937	32.127570817132394	31.39860405985961	33.08010093665678	31.034163384849855
Mapk4	1e-08	0.0041251999439115	1e-08	1e-08	0.0164371690230573	1e-08
Akt1	61.57859818639162	63.3092303899666	59.0859707101178	80.96951892952251	76.30325699048791	72.16469118200062
Asah1	60.35173257656001	55.68302791467765	63.59788934381101	75.22008646492579	72.79192968985966	79.28695220253714
Sphk1	4.449675098985939	4.605355088423983	4.503079518723633	6.112564127335057	6.10926322341765	5.3806977396076725
S1pr3	17.357956396777634	18.427797842821892	17.87483444619643	26.05310860273603	26.74551890354405	25.97560776338527
Pik3c2b	0.0552173972964057	0.037379897890107705	0.0968938077681826	0.11927537864196139	0.1464608640139875	0.12147941561477779
Plcb1	0.3213051226099584	0.2701862425808913	0.1798641268062203	0.5304094929714239	0.554503199752876	0.4793666539427648
Mapk12	0.4785895931267326	0.178191956617118	0.316035465064638	0.9073278790357244	0.6745194704000792	0.9531002741592485
Plcb2	0.0135873586755136	0.0494652036484065	0.07361947507832599	0.4442065382420422	0.3270037378541263	0.2237782191459484
S1pr1	3.9801521026397984	4.299394959597406	4.099673229409434	10.495692638685417	11.767132972428437	11.104862880934268
