# Supplementary material for: Peptide-based Self-adaptive Implant Coating Sequentially Regulates Bone Regeneration to Enhance Interfacial Osseointegration
Source: Research Square preprint supplement (doi:10.21203/rs.3.rs-5132912/v1), 2024-10-01
Supplement: Supplementary file 501 [file 79_Burn wound healing(WP5057).heatmap-data.xls]

id	S1	S2	S3	C1	C2	C3
Il1rl1	26.456654049639482	26.13948160143325	28.00294362932273	9.137356387232712	9.098075057176182	9.484564874200935
Ptgis	1.2525338562399204	1.5875829581385554	1.6650448644536815	0.6601725163835171	0.80391074798771	0.6986718006306315
Cdc25b	5.801015644082527	6.237803499304852	6.066476584706032	3.850393636826672	3.5465330769464583	3.3318495472218994
Adora2b	7.17288087365845	6.087953985514548	5.563245531883892	3.938236429869523	3.5344398386819087	4.1737222033527885
Casp3	17.781763382308625	15.987098274989131	20.394406860755527	13.01954661222615	11.912954917469607	14.042574722078397
Ccn2	633.493737225515	640.018813836593	652.2902691098908	466.774490791458	463.0334204492682	464.4224652502593
Dll4	0.0067943341392238	1e-08	1e-08	1e-08	1e-08	1e-08
Jun	20.180822618803965	19.29234408498486	18.496194628591486	14.61707348545869	15.940556545850256	16.22842065300743
Chp1	53.867242985423935	53.27750116700492	54.86835589882379	50.94088398420147	48.766733734879615	49.718216259484656
Syp	0.0502295806940922	0.0099743237421942	0.10205839020510399	0.0812604530636322	0.0695510902828625	0.0101297362813765
Arfgap1	31.28162633495936	31.165563861233604	32.025696402212866	34.02407831240149	32.80235118531111	33.265949153517326
Col4a1	280.8203016478587	277.11071736245475	271.15163799988665	306.4159035643247	301.7004711322021	304.2046074555721
Il1b	0.1261396883686192	1e-08	0.018306829036790703	0.018220221596364203	0.14258048073425258	0.1635326459260579
Tp53	39.50341128406762	35.939405464852236	37.07621340535638	44.760803150360324	46.297627485826496	42.42578257351217
Glb1	42.90577213791989	43.52370361160701	39.73997619419076	51.76418227329173	51.61264152238824	51.65616805739458
Pdgfa	10.249847721057305	10.371819491037552	9.696442796249134	13.821349616184117	15.003247784680841	13.855506079671821
Gpr176	26.70760615356436	25.98277922754307	25.48459040954779	37.48860815075532	38.2309479899416	35.03126489263145
Syk	0.5559910455341377	0.5751903492549122	0.4581935378922481	0.9356392896312299	0.8267735893746656	0.9487578248669096
Acta1	10.240993071034794	9.827989470498299	9.658511308183185	24.436014205424772	23.225298176711732	19.20584941716172
Col1a1	2526.782231321241	2495.8319610587514	2367.8312553481283	5956.101136185713	6023.940456224581	5759.444283936097
Igf1	2.423217016830136	2.750011328441961	2.7855777978803373	8.127938888705778	8.05812319198946	9.329937816191425
Ankrd1	0.6031914190334415	0.4110045115795765	0.2523268653952065	2.5472074335832287	2.8191513579831864	2.2063019562351776
Mmp9	0.4997413287227106	0.5434347057568754	0.4109926970792275	5.077011613958169	5.405555238533193	4.535195543410697
