# Supplementary material for: Peptide-based Self-adaptive Implant Coating Sequentially Regulates Bone Regeneration to Enhance Interfacial Osseointegration
Source: Research Square preprint supplement (doi:10.21203/rs.3.rs-5132912/v1), 2024-10-01
Supplement: Supplementary file 505 [file 7_Oxidative stress response(WP173).heatmap-data.xls]

id	S1	S2	S3	C1	C2	C3
Nqo1	894.6821790485358	921.6159441269632	909.0405393737236	68.69985844488146	66.05850646634667	68.18367461601659
Xdh	75.05995622186845	75.15189912082451	71.81610808801123	18.149829531854888	17.12363447640194	16.673242460234448
Gstt2	8.915766994142976	10.588618807247506	9.458328754669271	3.640612021513944	4.239471827179759	4.166588951125471
Gsr	31.639221044314738	32.404927902106515	31.349725024476232	17.13424760016886	18.089473346522333	16.880811046501314
Junb	47.46256013265997	46.16282830337983	44.78167922135118	31.117059196153807	30.162419331744644	27.821619549509965
Gpx3	480.7820620330932	521.9704307845308	477.1120587436126	335.53312908646967	342.96932226730803	316.388431135584
Cat	66.44997409393002	57.64951973545529	65.28311092621782	47.06300016660178	46.644140494812724	54.234913306544726
Sod1	252.26410909380928	272.6012017096636	240.69963390859544	206.81650059654024	204.7887688347477	204.4500109767816
Fos	2.5928321149615767	1.9085714488013719	2.2102287018150295	2.0039022246027764	1.7243578144164984	1.7880528838699374
Nfkb1	14.957286209322818	15.889074808340112	16.81443894458752	13.333081618706421	14.262562076130212	13.38024868931767
Mgst1	51.87658773490025	57.53424392368	55.479048761836644	49.45046317094978	46.5257799760386	48.6260027746506
Cyba	123.71700140410675	135.02781530916945	122.20572797570252	115.0762983140458	121.69074655405771	106.55158667591964
Txn2	80.43282598477715	82.80624537565319	78.80741408187582	74.62919236705805	81.52990246711269	78.52329202134001
Mapk14	25.36185508163248	25.973621599907055	25.642937088349232	25.8743005520766	25.31623295217376	24.20042114771716
Nfix	34.33825247195965	33.029264447891705	32.13048562205697	33.007027618765754	32.947687808855044	33.094616007045346
Mapk10	0.0228428348864892	0.029160031694207	0.0430977336475274	0.0263962151131451	0.0548677497199168	0.026323896268141602
Sod3	112.81009662986364	117.09910023057367	106.14287333013404	143.03958685291937	140.0801232691668	129.0477503807296
Txnrd2	3.1475579057963263	3.2198250036433453	3.500473978753844	4.363933348176937	4.480946677108952	3.871095820753191
Hmox1	182.4629089033856	195.83333053188144	187.53347604882936	256.40644083247014	267.26417318913246	244.55506837417047
Sod2	36.096385181968124	38.65114198566309	35.09840084574602	76.21815387892553	73.12576042991049	71.00294040438285
