# Supplementary material for: Peptide-based Self-adaptive Implant Coating Sequentially Regulates Bone Regeneration to Enhance Interfacial Osseointegration
Source: Research Square preprint supplement (doi:10.21203/rs.3.rs-5132912/v1), 2024-10-01
Supplement: Supplementary file 509 [file 80_Myometrial relaxation and contraction pathways(WP140).heatmap-data.xls]

id	S1	S2	S3	C1	C2	C3
Gucy1a1	0.7656378299585407	0.716988792546095	0.8043430485835809	0.08797119514650979	0.1376819784327083	0.1008897016111891
Rgs7	2.643684725434404	2.6574490883129958	2.2019980323947843	0.4648807485946145	0.568418512866529	0.4718857923081326
Rgs2	64.19044357786466	61.5364339956945	71.67384234207897	16.357015428404967	15.58976949475044	14.848285884535914
Corin	0.017986720512899103	0.028063388447517	0.0182730562832773	1e-08	0.0025413927800435	1e-08
Prkar2b	13.44078490322951	12.355656284542738	11.802625377012447	5.522632475037644	5.0662956985168615	5.254454492766318
Rgs17	1.184057896704755	1.3039741380788241	1.5282593510775069	0.5971228497520974	0.6654566287920496	0.6725150391427489
Slc8a1	3.059066726587069	2.7973245439318766	3.1252054264307785	1.6730443546162224	1.5248597967534596	1.800286341709458
Adm	146.57620311160423	143.97212107924875	150.05425103703382	81.90464592818273	84.96295209701096	82.59258813349749
Lpar1	7.660265580016831	7.393693301026719	7.6000193708191235	4.444031845788575	4.164037974471191	4.78778262142114
Camk2b	0.2890198698012059	0.19130662610593668	0.1957472450172578	0.1244690956386349	0.142926940964902	0.07555622786457099
Maff	8.352899624295693	9.425633790457896	8.71961448566807	4.986518604232346	5.530685627160311	5.5276380054254535
Gnb3	0.1065215635837825	0.1661979742634123	0.12367692626911579	0.0923188713275937	0.0301013497404897	0.0613772975198058
Grk5	4.8186597043852935	4.288531599119134	4.603676381586407	2.9157525903035886	2.7842092851979827	3.137490131348208
Adcy5	0.1704190335513618	0.2123349351174871	0.17652672904400749	0.09460317469848059	0.1321978215613942	0.1347771189201493
Adcy3	13.195185617948276	13.115854241003685	12.99370119817736	8.541565260226315	8.819322017964177	8.97645071958866
Adcy2	3.8475206042031846	3.643940755667884	3.919070214049463	2.52688708183643	2.932995676043477	2.5659674585747463
Arrb1	11.487281266066464	11.457101028419038	11.035432984130582	8.542508824730097	7.842690674364045	7.682307341922464
Mylk2	0.0336338446948793	0.0083485389383351	0.0427115870851261	1e-08	0.0083163602550074	0.016957229350287203
Prkcd	21.118847153613842	20.74457908714249	22.378984886497918	16.584802076850767	16.700452485654615	15.175962029215619
Rgs20	0.0829359806661824	0.11322419230904969	0.0421281364699527	0.0628932447748405	0.0410137443574448	0.03136047170561
Prkca	9.316841770358932	9.24258726021399	9.066203536910672	6.635572306714202	6.949536254440923	7.6485364330296575
Ramp3	150.74501743184203	157.1372138755113	148.2760075712104	119.32372846951128	118.44313691802755	113.03742109313599
Ywhae	349.48916020861515	333.63829035462817	347.00750044747537	267.9780181024126	267.852307692353	283.6948810025157
Jun	20.180822618803965	19.29234408498486	18.496194628591486	14.61707348545869	15.940556545850256	16.22842065300743
Prkcq	0.24924442710731678	0.2474679835826503	0.2944328155611141	0.2461535075716404	0.19491815903682588	0.1987211861901962
Fos	2.5928321149615767	1.9085714488013719	2.2102287018150295	2.0039022246027764	1.7243578144164984	1.7880528838699374
Gpr182	0.0091563207599362	0.08181946762303399	1e-08	0.018516141506282002	1e-08	1e-08
Nfkb1	14.957286209322818	15.889074808340112	16.81443894458752	13.333081618706421	14.262562076130212	13.38024868931767
Gnb4	6.999247667661711	7.42446303658138	7.205424777063872	6.371788054265386	5.891810142777934	6.452467371831245
Ywhab	121.34647770286459	118.38566336037469	122.43826347839826	103.40496654173793	104.71493499624876	107.88439955571583
Prkce	4.200860965792414	4.373527614445829	4.332073439388372	3.6214416864189976	4.092207820711258	3.5831385677498524
Ywhaq	146.0062871033302	146.3992943674979	144.73207163788854	128.7289980150544	125.42859712295443	129.6616691240951
Gnb1	119.8661600891432	121.04380168732978	118.1574405931722	108.86055852353468	103.89533373824844	105.19820852071987
Plcb3	15.340610270499736	16.351003722091587	14.979440459613775	14.276180021203025	14.427331737582184	13.089957608161185
Gabpa	7.280265739169642	6.82399226433393	7.8945688137298555	6.078933569591833	6.408596422302852	7.425008193878089
Gng8	7.03765575793093	7.034168374243088	8.630112792513877	6.769578558925066	6.801161250424111	7.0421995105708
Gsto1	37.64005338831383	38.39298650302365	42.06318219626341	36.79711499758453	36.0373128192774	35.43851973402807
Prkcz	0.026245958226708003	0.13029443540375998	0.07554734486861839	0.0840358131987493	0.08220174730720829	0.0088216485905059
Adcy1	0.0735576975588539	0.0146066937467236	0.0523100819168689	1e-08	0.0072752017732528	0.08900565713962519
Grk4	0.3449159171394872	0.39357066480097547	0.4262410269516157	0.3877880682243477	0.24185130038151909	0.4516124769057046
Rxfp2	1e-08	1e-08	0.029470344106392602	0.007332738342304	0.0071727028998777	0.0073126485437073
Rgs1	0.1804742449481333	0.1254315667320598	0.5317070574206919	0.1277359141641452	0.4105437396618314	0.1637819334808233
Itpr3	9.95491206644065	10.25517628660466	9.326395762760736	9.459052975449456	9.875126976351345	8.863569192565965
Rgs14	0.16363663491496258	0.3249406802190985	0.2909228183973759	0.11581860451510609	0.3965180727460085	0.189752114851314
Arrb2	1.6542735639817563	1.3548592794053342	1.57992682382034	1.6803657705285695	1.342097219472626	1.3990306609424379
Gng7	0.123845053302167	0.1513383000203695	0.08710378868802539	0.1107727388001048	0.07537749482993679	0.1584993541745619
Ywhag	146.83701342174285	152.3009750433787	149.03209666789675	151.35178318241594	149.39583533931827	146.372039482617
Gnb2	79.14130148796768	86.01316094811379	76.6794335303003	83.11716753684088	81.80125300585053	76.35330357329194
Atf2	9.935835239564874	9.037740356375293	10.1925697031345	9.313413331938529	9.556061722351165	10.24891232364405
Gnaq	25.28679433799367	24.23473328290259	24.551182549734694	24.415899031744324	23.5461186450472	26.03969686722987
Nos3	0.0059463233162217	0.0059039420668889	1e-08	0.0060124052882025	1e-08	0.0059959328641899
Camk2g	22.89362976630881	21.6724177953688	24.191972460972572	23.444059809452444	22.625474029985305	23.62189297381381
Guca2a	0.21217043674906	1e-08	1e-08	1e-08	0.2518155187967849	1e-08
Ywhah	78.37532804028417	80.61778992208359	80.99188502331855	84.24179094736101	82.76415999845175	80.81245837758595
Vkorc1l1	10.326875423033755	9.711145474231937	11.070100810464657	10.62406765332443	11.5192340597898	10.494420812223419
Ets2	5.300564772615423	4.640873699759983	4.496459955231576	4.36166493824171	5.47043584971613	5.32095284423199
Plcg1	23.28142951676821	24.12788633145028	23.22082302283229	25.298905824112946	25.29892086182227	24.33169333432177
Prkar1a	90.9965047438715	89.13380868879766	91.54980335316179	97.32652475036441	94.36455621732789	96.72233532203573
Atf6b	33.69352684389343	35.62280508860083	34.619498005858645	38.107788735797854	38.03466971834331	35.47641896078403
Actb	4024.870591861198	4373.085949730487	3911.985913364068	4588.973979297553	4562.296785633169	4186.84035351396
Adcy7	4.82818988400308	4.914798892396706	4.574837438752558	5.269837541827521	5.261983932189136	4.995929832232965
Prkar1b	4.535398972604424	4.621770920851739	4.038291342922212	5.122196522940408	4.788706170343781	4.550634900029503
Gng12	29.35435359207597	27.94769153124061	30.27690376576305	30.78254516912089	31.358267609307664	34.39672104633895
Oxtr	1e-08	1e-08	0.026238186499065203	0.0313368660701867	0.0204352999808909	1e-08
Creb3	61.31096886912245	63.98598522838864	63.674187750805764	70.31793364343689	72.6403584453504	69.80193026081182
Rgs3	3.5723551859312317	3.403405905085214	3.409821444854412	3.823852901895703	4.0310858842582284	3.8821450139761198
Prkacb	9.356520979241633	9.00196319699439	9.517743247868886	10.220883345704463	10.153143509901184	11.401895874852745
Crcp	7.736298110047757	8.613119665992052	7.736410232387813	9.276510860894712	9.029131671006967	9.159500590001715
Camk2d	22.60279829567543	22.700408543100774	23.72787913299141	26.135264006252328	26.989302081280858	26.28818207145661
Rgs10	7.660600476974883	6.6308726354838345	8.127233626912274	8.612388987334844	9.466440042052891	7.832547300847617
Ryr2	1e-08	0.0013111168813981998	0.0026830907221396	0.0013352036890090999	0.0065302766661371	0.0013315456000894
Actg1	1004.9900081797816	1030.0562814238456	961.6641816116764	1195.4489166139979	1173.9654500667714	1149.816226584511
Il1b	0.1261396883686192	1e-08	0.018306829036790703	0.018220221596364203	0.14258048073425258	0.1635326459260579
Grk6	9.35903555963267	9.981941516273807	10.213642850638088	12.080631932391517	11.990447276867707	11.035909094005621
Ryr1	0.016955964422052303	0.024487433985784002	0.015659902073656	0.0187029783257256	0.0167702245367561	0.0590638121038844
Dgkz	4.413909347765375	4.432699246730451	4.183027106814763	5.267098778276981	5.402423024145128	4.902733401877863
Atp2a2	73.97865687021066	72.33231600135458	72.70136293503177	87.88830598208008	85.45737111175276	89.20225777706054
LOC100361457	118.94461495838262	112.93088490001708	108.27946144235443	125.7014575093517	137.33782386924267	146.6778156252665
Adcy9	2.011629452557354	1.6883774509699851	1.7929650554279235	2.2970469354492957	2.2760950155426656	2.12307153282346
Rgs4	1e-08	1e-08	1e-08	1e-08	0.0079332221673783	1e-08
Rxfp1	0.11239662214491339	0.1078756851930698	0.0761239347289336	0.11364569688744919	0.1408095049506072	0.1322233912629994
Igfbp3	1.6955016636253109	1.5958406674576537	1.6328834020332184	2.269276082274663	1.9677255855689164	2.253176493736183
Pkib	0.0111427015883271	0.022126558226213403	0.0226401607899699	0.0112665314294694	0.1322475901492761	0.0561782802240105
Prkcg	0.021279021121271703	0.1267641034101196	0.0972799209993652	0.1559872899575503	0.1631058540487824	0.10728270982118379
Nos1	0.0078081615664287	1e-08	1e-08	0.0592119424920593	1e-08	0.023619892781735603
Cald1	319.03310225772134	297.4475780500446	331.46074091484934	420.3573834107061	417.2782205169208	472.68590247050963
Rln1	1e-08	0.0264151307756761	1e-08	0.2690040328946365	0.0526266219507887	0.0536534141465268
Itpr1	17.650607018387326	16.45779279476696	16.98138343512774	25.01842063864188	24.320555359002444	25.20232854785073
Adcy4	2.9297988795834065	3.333670686157192	2.666942218269621	4.33212091415236	4.269627435090408	4.666656483987404
Rgs16	9.4914395363548	9.183694467933165	9.417339327955567	13.90636329568294	14.85850805097387	13.055471425356485
Rgs19	10.090397272296444	10.342004474792365	9.688270958712467	14.946875372020378	16.038684221433385	14.66497667409577
Pkig	7.2279086644872	7.345647634775141	7.516155181364199	10.927876896863037	11.667270624921446	11.723017738170947
Prkd1	0.7122208641615412	0.7722763840234291	0.6664358470728279	0.9949245194790415	1.2234645954839038	1.1559902076504007
Gng3	0.6982302504654234	1.223388951388644	1.5230066844553691	2.408670896699243	2.1529898501723377	1.6773087285269395
Gabpb1l	0.4898942091419674	0.3616839713900273	0.3445566815051786	0.5207404235504131	0.7205797736338767	0.8866331872754973
Myl4	0.890287371178702	1.189921936482013	0.4348366010040316	1.3848941842659521	1.778003222871008	1.985331143187645
Atf5	181.78170367181545	191.31792498959308	186.9120739275424	316.7901698704232	323.8114617937012	296.06688360443366
Gng2	2.827891006687808	2.1377771030345785	2.031601623957468	4.143219483868375	3.9071851014137406	4.3359873562405005
Plcg2	0.5901699546190872	0.45160254315328857	0.40862076614140397	0.8931924435356917	0.8476736166878912	0.8300988353849464
Rgs18	0.1306876245896367	0.5308206758634371	0.3379550958011062	0.7568015937281621	1.0105471446496164	0.8146272099367303
Gng13	0.4872061751274711	1.4995744589730557	1.3363977996857235	2.4138406351924067	2.505719764200106	2.947625299531415
Prkcb	0.030140949376508002	0.0374076542511166	0.0535863433511407	0.1676174525037758	0.0819796213819171	0.2051487267138603
Camk2a	0.1734123738589304	0.09346719818093399	0.11073730330729159	0.29056263108853597	0.2156160514305176	0.3097504641541487
Gja1	497.5570241606772	481.1745997603615	504.4738989976749	990.2851133265376	982.6806857467428	1016.4901187532574
Pkia	0.08637746417307829	0.1232826188185341	0.0493608038734809	0.33297375379730537	0.2135781433160144	0.2449633976046969
Acta1	10.240993071034794	9.827989470498299	9.658511308183185	24.436014205424772	23.225298176711732	19.20584941716172
Pde4b	2.4853229120129585	2.7433592600019514	2.8395941104901166	6.343559838915954	5.879362002491671	6.340541471147532
Pde4d	1.0102834822038653	0.8568989964285745	0.9911003373186172	2.2052047187886594	2.1215593565465336	2.458669085864794
Atf3	0.6564022677549044	0.6635734069050906	0.6183534227678903	1.6652759218910913	1.5108930627807091	1.6968159591803575
Prkch	0.2156220130693796	0.2249708950751366	0.10024531418077809	0.6355785842353906	0.6939987328083641	0.5601352556352954
Rgs9	0.0420946226670134	0.0365702772072138	0.0106911923174857	0.1542887617980126	0.1353088767268057	0.14325459907122678
Igfbp4	75.72872368189243	76.28623406603057	72.89914080744063	235.5745548598609	231.2448348774593	223.25605437354545
Atp2a3	0.118986038267312	0.0945103918707609	0.08703375549913049	0.5197320035805519	0.4142428489935452	0.4175259479965404
Il6	2.7416885981804846	1.3048311434357924	1.5883311629087737	24.74322171395451	22.43278580944411	26.091984175764107
