# Supplementary material for: Peptide-based Self-adaptive Implant Coating Sequentially Regulates Bone Regeneration to Enhance Interfacial Osseointegration
Source: Research Square preprint supplement (doi:10.21203/rs.3.rs-5132912/v1), 2024-10-01
Supplement: Supplementary file 513 [file 81_Matrix metalloproteinases(WP278).heatmap-data.xls]

id	S1	S2	S3	C1	C2	C3
Timp4	2.644687716828073	2.407018345254167	2.2809721536520726	0.9888519126592252	0.7356704493120731	0.5972413644757372
Mmp16	4.214634796651103	3.8179454712234278	4.01055265804312	2.9749136295249023	2.7829477070654	3.2399643698213545
Mmp15	0.3597005700474896	0.2586163574580342	0.2709198343103065	0.100330478465679	0.17788016380432908	0.3064202502868042
Mmp21	1e-08	0.025360805566722502	1e-08	1e-08	1e-08	1e-08
Mmp24	0.044654832489759703	0.06650484024144769	0.10774353759842459	0.0846582774597689	0.0441656720803413	0.022513696794157902
Mmp28	3.979210751450955	4.070407698458965	3.8312541449242574	3.840800397912648	3.5187812182213696	3.8965071715151054
Tcf20	6.475280765904622	5.663974597276142	6.257086549156134	5.873580067985223	5.690730106488752	5.959653449706768
Mmp23	52.69256829407968	59.01077082872161	54.32168169287952	56.52092365386304	54.97691341727685	52.0450389982209
Mmp2	617.7133433703117	647.1596844253282	604.0931237743388	670.6966692725189	657.9076942510458	624.0135343014572
Bsg	333.80028604835735	351.5398565454164	330.0645541048798	427.01656563416014	440.3840114136648	402.530472947119
Cep295nl	0.510394908766662	0.4889315349293264	0.5237312928296087	0.5160669780986684	0.6722263113752993	0.8896515596913275
Tnf	0.070178491402475	0.0278713288978681	1e-08	0.0851500682250953	0.1388194665388322	0.056611189241741404
Timp2	420.0222225090125	427.8786117019858	422.8797627187514	612.2118964666812	611.1316487728687	578.3994597096746
Mmp17	0.1785431382330689	0.1941535188969805	0.14395668393383018	0.263627172113858	0.3111300515690257	0.294339181640462
Mmp11	5.100893067555326	5.950310394304461	5.011491721321463	8.627803238983693	9.373765352750528	9.069827347030243
Mmp14	159.69256782534765	160.07174733401285	154.363771173037	276.6165730231205	280.77737829278766	272.6206613470732
Mmp9	0.4997413287227106	0.5434347057568754	0.4109926970792275	5.077011613958169	5.405555238533193	4.535195543410697
Timp3	0.2363095870977554	0.1564168928366718	0.2294016265927589	8.192839986059381	7.733567588543441	7.805029369465818
