# Supplementary material for: Peptide-based Self-adaptive Implant Coating Sequentially Regulates Bone Regeneration to Enhance Interfacial Osseointegration
Source: Research Square preprint supplement (doi:10.21203/rs.3.rs-5132912/v1), 2024-10-01
Supplement: Supplementary file 517 [file 82_IL 5 signaling pathway(WP44).heatmap-data.xls]

id	S1	S2	S3	C1	C2	C3
Foxo3	24.86331911163179	23.08464871736249	22.613161519396037	9.019639700927105	9.319846192809445	9.217490181130133
Alox5ap	5.281481228426653	5.871091848572376	6.341114815701951	2.989475880226093	2.19942170049401	2.3442586714288267
Pik3r1	16.383475819057892	15.501270229910459	16.875801974644048	7.005672301545564	7.250801604137134	8.172077605732419
Nfkbia	14.182739478986589	16.213418968863294	15.13048073230388	8.286217159675273	8.225008486983109	7.562183511418527
Alox5	0.2220100028795789	0.2458616281825465	0.35566592012912507	0.1899422663388742	0.1013437199953883	0.0774907722094627
Jak1	63.589923284567526	61.10367359746769	66.05324421422446	46.877349448789964	46.35430640618424	47.462641442495425
Prkcd	21.118847153613842	20.74457908714249	22.378984886497918	16.584802076850767	16.700452485654615	15.175962029215619
Stat5a	5.580592851124818	6.659387138663961	5.310101766859124	4.0796339107401245	4.761507369281945	4.841199354822924
Rac1	314.18486117310005	300.69546008230236	316.63515813440154	242.0435022918744	248.6773534130673	238.12457893963392
Sdcbp	146.75570751262399	148.42817166597135	157.67940443733016	119.57496259191035	119.12876382391906	122.4828927766194
Jun	20.180822618803965	19.29234408498486	18.496194628591486	14.61707348545869	15.940556545850256	16.22842065300743
Shc1	100.75947629607876	102.67265380377755	99.631886081142	86.71181347307665	83.94137614285097	83.58139251076193
Mapk3	90.68227442303372	100.31036398697587	85.37399712077665	79.47662132913044	81.85347769599866	72.78668334012438
Nfkb1	14.957286209322818	15.889074808340112	16.81443894458752	13.333081618706421	14.262562076130212	13.38024868931767
Il5ra	1e-08	1e-08	0.017397666857046502	1e-08	1e-08	0.0057559803098371
Socs1	0.6367252436186916	1.2643741943550535	1.2532940715876197	1.1870085177476775	0.8659067847869275	0.722292055737278
Lyn	4.722705017211044	4.671526585330706	4.481214654996838	4.025906465904256	4.2928727449127	4.54861194151312
Ptpn11	41.870856779508046	42.69738596846121	40.89985349108594	39.353229012614484	38.37171817440022	38.87464277078163
Mapk1	15.253876836690662	15.382008646431204	16.54507058531675	14.759410907995575	14.620207773677492	14.694649485138859
Stat3	49.260296108632225	50.3441265456452	49.39976371143686	48.40036706984254	46.82186110409516	45.92858278993048
Mapk14	25.36185508163248	25.973621599907055	25.642937088349232	25.8743005520766	25.31623295217376	24.20042114771716
Cdkn1b	16.870731492951506	15.065644018400432	17.369830281440194	13.93586550106619	16.25657971914844	18.1754259984119
Hras	17.833924304644963	17.42853688688946	16.0402887807215	17.4443389221126	17.043085607565825	15.983469066829116
Atf2	9.935835239564874	9.037740356375293	10.1925697031345	9.313413331938529	9.556061722351165	10.24891232364405
Gsk3a	29.18503004735248	29.082774683174716	26.522356143762824	27.30154864939425	28.918003682149	29.127788701045663
Pik3r2	19.532663833307623	20.95827346985304	18.37146464057553	19.5986826937952	21.12867162822361	18.799340405466985
Mapk9	10.23249110572806	10.210942603663616	10.524431321739188	10.46512770377505	10.427503613191798	10.488638212413484
Grb2	42.751066826508776	43.96751310799614	43.049509901534456	45.60081989103561	43.81619123592394	44.38431606086827
Stat5b	2.996170057514959	2.813816789779069	2.9540111242594	3.2642225222112744	2.934189592267906	2.872523936123432
Rap1gap	1.7206450871137495	1.3123207449404308	1.2460052914067545	1.4327491206246392	1.6782424190165408	1.3807960659208012
Crkl	15.267456443411044	14.404099640763677	15.527853159539854	15.94651580354094	16.747048086737927	15.549812960032188
Rapgef1	6.820906632620035	7.117766972946526	6.859293219634447	7.784996057668854	7.676108304989851	6.808138896553353
Pik3cg	0.6500034919991295	0.4324649136006412	0.39484910931566297	0.5352673893610271	0.5368406008493507	0.5506933267918959
Gsk3b	12.812115293646215	12.582416230124974	12.986687460235611	13.480973494090053	13.71994594824775	14.894510353793144
Bax	83.67063185864612	89.46026733506457	81.99571439446731	94.52807831960384	94.66053692799716	95.53175622356447
Il2rb	0.0900655087645306	0.08048122620888769	0.0091499378107048	0.1183863373066163	0.0801710183160551	0.0544901541883707
Ptpn6	1.3773472593697744	1.6591362315175548	2.2635309112641	2.4064239359372634	2.103488840967155	2.0117731813025146
Raf1	22.056806721073112	22.496358092562122	22.123931305127766	27.12835700717631	26.916461635349847	26.292939395318143
Jak2	14.316782306957117	13.41171702845712	16.255475342200707	17.740894176548316	16.870162740296564	18.40436220523281
Akt1	61.57859818639162	63.3092303899666	59.0859707101178	80.96951892952251	76.30325699048791	72.16469118200062
Elk1	8.557259683918799	8.683000592218885	8.298616308461467	10.75681351009151	10.683257969779724	10.512416461568712
Map2k2	35.87197454734145	40.366143081387946	36.841650739806425	51.92634889593364	50.49454657605205	44.29722847678789
Rps6ka1	0.6490279855440085	0.5802825418087648	0.6659208505170645	0.9141661426243477	0.9453126141399009	0.810727603952804
Unc119	12.106712460606376	13.24811985842115	9.524568512639327	17.54082351379212	16.701668537718167	15.185209763458179
Ptk2b	5.0047402018208365	6.17640289322366	5.381813077450496	8.435828020403415	7.9788875615546155	8.30486067774468
Itgam	1.4073236132805402	2.1483382502030226	1.6978010652470932	2.8281396296002983	2.8360113754163905	2.5661421454182114
Btk	0.1735576407605923	0.2872010613655539	0.3022638032692317	0.5933111515955352	0.3187905337018983	0.6166864318307611
Sh2b2	0.9182322641285985	0.7750659420131621	0.9140315782696277	1.4608830552103222	1.3112248648690876	1.3101252378716348
Shc2	2.4078517495498084	2.6436095997193725	2.5817397973488037	4.317294082358181	4.552997274200473	4.091415655861113
Syk	0.5559910455341377	0.5751903492549122	0.4581935378922481	0.9356392896312299	0.8267735893746656	0.9487578248669096
Hcls1	1.14376909547157	2.0965238549361547	1.6647556402541155	3.9475996864310448	3.0021367864959934	2.672577496156189
Prkcb	0.030140949376508002	0.0374076542511166	0.0535863433511407	0.1676174525037758	0.0819796213819171	0.2051487267138603
Pla2g4a	3.827964919403231	4.016441035531331	4.321947256417437	8.24806405684776	7.158742490577289	8.427732041487634
Hck	0.5295080813461227	0.6400241322458433	0.7250461613316809	1.3850372518459382	1.7191274723399366	1.8571329099672886
Sox4	10.624261715632471	9.529646258479115	10.4560989686883	28.71742246175642	29.2847473829217	29.343807027103853
Csf2rb	0.2293290136338508	0.3053176397448283	0.3282896717409789	1.1119583075871404	1.536168843544815	0.9407356268372439
Pim1	0.6728833634041617	0.8847645392067873	0.831399556578676	2.923714240400922	2.1764054788864975	2.163855810103016
Itgb2	2.8256154879372497	3.3781705898655345	2.8112567849725583	12.564968058114014	11.481948602593457	12.037272758044807
