# Supplementary material for: Peptide-based Self-adaptive Implant Coating Sequentially Regulates Bone Regeneration to Enhance Interfacial Osseointegration
Source: Research Square preprint supplement (doi:10.21203/rs.3.rs-5132912/v1), 2024-10-01
Supplement: Supplementary file 521 [file 83_Striated muscle contraction(WP316).heatmap-data.xls]

id	S1	S2	S3	C1	C2	C3
Neb	0.1410077409765329	0.1590031041752491	0.1391595569458782	0.0549931332307466	0.0308811241205976	0.0294524401548738
Vim	4182.501729840396	4360.834195791314	4157.350475918131	3017.0243544537757	3025.1772023953376	2912.0323859269724
Tnnt1	0.2759114674969767	0.29884904589430217	1e-08	0.0760848342721058	0.0248081056759544	0.1770448764368975
Tpm3	50.1536746567255	50.73824327501687	50.59110484137851	44.626324474764054	44.69544380196957	43.772235559541514
Tnnc2	0.0330701491413339	0.0328344478356868	0.0671931949562654	1e-08	0.0654157706650865	0.0333460502865984
Tnni3	0.1161836195446275	0.41527992641445727	0.0944265466608166	0.093979825653082	0.0919287335254209	0.28116701504656877
Actn3	0.082560050534153	0.1147602627423029	0.0922617820912738	0.1419118254252388	0.0734901009563838	0.0416244256994499
Tnnt3	2.7662284599676847	2.8501546653328758	3.640972092406072	2.497922744270695	2.9252044141713216	3.455933642994327
Ttn	1e-08	1e-08	0.0002261475920275	0.0002250777612727	1e-08	1e-08
Tnni2	0.0348722038515391	1e-08	1e-08	1e-08	0.1379607894880765	1e-08
Mybpc2	0.0065032287929676	1e-08	0.0066067554584847	0.0263019688438589	0.0064319908618787995	1e-08
Actg1	1004.9900081797816	1030.0562814238456	961.6641816116764	1195.4489166139979	1173.9654500667714	1149.816226584511
LOC100361457	118.94461495838262	112.93088490001708	108.27946144235443	125.7014575093517	137.33782386924267	146.6778156252665
Tnni1	1e-08	0.0158419624867599	0.06483871677720489	0.09679795354833949	0.07890446524966639	0.0160888003269571
Actn4	205.8210007809196	208.6655313666025	197.5823123553908	262.17371618613254	262.51084982120426	254.9276610431289
Tpm4	706.3517159575798	696.8255735340804	764.9809721000906	937.832482066997	925.1358536399204	981.6540723829988
Myh6	1e-08	1e-08	1e-08	0.0039566052797261	0.0232214699088755	1e-08
Tmod1	0.11064589609904249	0.1943628864479119	0.12105401539209279	0.1549045551751285	0.2862115983592501	0.2488846902699243
Actn2	0.0321824355864017	0.09585916388522639	0.0408684439353432	0.2603205866917855	0.0954896830605545	0.15414188293879869
Mybpc3	0.10533510081683599	0.0055044486537934	0.0112644259280463	0.145744638653287	0.3618926798652928	0.257149432355281
Tnnt2	1.1370896530178434	0.4316708396251033	0.8494053848002481	2.231821521981772	1.901954011823173	1.6524187634110432
Tpm2	565.0548676906219	570.7154364728402	573.6311096177901	1092.5052913653585	1094.8085686511959	1083.7933604602256
Acta1	10.240993071034794	9.827989470498299	9.658511308183185	24.436014205424772	23.225298176711732	19.20584941716172
Myl9	352.5355652586949	384.63746254212856	345.9954650618977	945.2494727907492	960.7792408116768	880.7848000292482
Tnnc1	1.2815531340440642	1.373404743113334	0.7233080920463968	7.733634565108347	7.142344531413963	5.2715391553759
Acta2	477.2646447564055	513.0454583460424	470.61894808874536	2576.4505323985486	2548.322585931704	2414.875298098977
