# Supplementary material for: Peptide-based Self-adaptive Implant Coating Sequentially Regulates Bone Regeneration to Enhance Interfacial Osseointegration
Source: Research Square preprint supplement (doi:10.21203/rs.3.rs-5132912/v1), 2024-10-01
Supplement: Supplementary file 525 [file 84_Cholesterol metabolism(WP632).heatmap-data.xls]

id	S1	S2	S3	C1	C2	C3
Soat1	60.413286082283484	60.31855094238828	59.189439943120604	38.52506528654021	36.011488397434164	33.480643970075285
Apoe	26.08497439530461	27.708829951916858	27.722763126978283	31.188181668876144	34.218114159392705	34.40394217857564
Rusc1	3.704755461561137	3.773307919272022	3.6103195489724014	3.9749576263654958	4.709656649652112	4.969042055802545
Hmgcs1	23.754600988824755	23.66113141964437	25.73245551472277	30.11977302507365	29.526336937610704	32.12860367142526
Mvk	11.48731913102322	13.407107767354901	11.230323378639001	15.705530882680454	15.175409832129446	15.498782218087014
Idi1	7.917559821779072	7.5325550479638625	8.76643330963654	10.197245100098536	10.866604691494802	11.912855425426965
Hmgcr	8.985529534293116	8.787515673869352	9.225037179578154	13.37037429610163	11.956559648557683	12.734077207938304
Scarb1	7.715161165497477	6.488950309667205	5.537809091084192	9.599628503992529	10.105197538983715	8.72918683568745
Fdps	92.62636348479936	101.41806092235156	89.2558108446512	136.58441159993063	148.28862548291644	136.6422608156784
Lpl	32.05270047920999	33.328980160459125	34.84069725215304	49.39139288669232	51.21857662718624	54.55742241774863
Lss	21.772436373303858	21.79292580485641	20.42428954297229	33.61706060211019	33.743331949552434	33.682974838589054
Fdft1	17.014738392143993	17.60790644310298	18.298369745696828	27.76864067155409	27.992892885324263	28.924517915222374
Msmo1	35.95991299218881	36.63740222043139	35.520703877908396	69.2089841970295	66.95983245573854	69.0751537940524
Dhcr7	5.4628726182259975	5.501299020539356	4.960552244328873	10.460666501758341	10.609120899260377	9.401900828385816
Srebf1	7.260964765414956	6.795743979026152	7.051117998420728	14.246052740842428	14.526546845872792	13.318746848114055
Mvd	9.94651000424765	11.356960804639018	9.768023060865081	21.30138332818818	21.546974534880558	19.836108026085856
