# Supplementary material for: Peptide-based Self-adaptive Implant Coating Sequentially Regulates Bone Regeneration to Enhance Interfacial Osseointegration
Source: Research Square preprint supplement (doi:10.21203/rs.3.rs-5132912/v1), 2024-10-01
Supplement: Supplementary file 529 [file 8_TCA cycle(WP347).heatmap-data.xls]

id	S1	S2	S3	C1	C2	C3
Pdk4	1.4290013347486161	1.534301446212432	1.5530349150663565	0.184810493097438	0.0986056618656883	0.26807877317422557
Pdk2	17.944846335169395	18.29301174096739	17.929955706171235	8.087042104569647	9.444220781108372	7.6328382328098705
Pc	21.2180185817354	23.301879128260374	18.280933881310784	9.832179902247494	9.954210194490566	9.94741825864884
Sucla2	38.01632015322154	36.05008023995203	39.83920517874002	27.142685769940858	28.09366376504761	29.462739436938076
Ogdh	41.98482875020507	43.951381456694506	40.080044544213564	32.91239434682927	33.11179252712013	31.04203445606333
Fh	30.18635599829495	36.68606920330385	30.575494975285913	24.72980049091358	25.613895312951495	26.2799742348039
Sdha	71.57539995739472	76.29990815830901	70.62307687995305	58.649492822410686	58.84022702003767	57.587044599311774
Pdha1	58.74948513604576	55.93349323713145	60.416451485083456	47.15446184835943	46.8295896436724	50.334700940142426
Idh3b	40.46684116299471	45.30499970269728	46.899802698867504	36.59166271395357	35.324679584012976	39.40271386421485
Aco2	111.13837541724219	120.91400291631355	106.68772710506967	98.21231514230391	96.2623344221942	89.83366112892107
Mdh1	89.30395613633483	90.64535767114867	90.50786053957816	79.34558703138623	77.27719162090088	77.81872025360838
Sdhc	78.8949717274742	86.52330329618373	76.43492568696342	73.59459361620075	70.91079207425815	69.6065847846799
Pdhb	31.27062022010656	29.69269478097032	33.54530457303459	28.04099742060112	29.40788034677595	29.35369635298501
Mdh2	173.10227485321556	191.1714056906452	168.47928634469378	163.3427433061892	167.46921169141623	160.50949891900817
Suclg1	67.66022662015892	66.87513150228085	64.99928960688823	63.149669036772785	66.44766533124628	60.650594282640974
Dld	29.75142419070108	28.840837204447944	30.73441065271081	27.60451665447201	26.81009545066753	31.124929796251852
Pdhx	11.402118262223421	10.8535996350176	9.91711887179048	10.35963364127113	10.65218212061834	9.816044159873952
Sdhb	66.30389203976874	69.82623626352678	66.04640282301595	65.61066297407194	63.55164728929569	66.26692715503195
Afdn	8.743314647199156	8.096578825879012	8.06148476874382	8.354703963736362	8.099986589789298	8.299731756109104
Suclg2	33.11126540781656	32.084239438286275	32.45126369978442	33.01737758184927	32.6014660095816	34.212289339557216
Pdk3	15.88423396453415	17.15126928592555	18.394441579100608	24.989800579587836	23.33995306138939	21.865053186334986
