# Supplementary material for: Peptide-based Self-adaptive Implant Coating Sequentially Regulates Bone Regeneration to Enhance Interfacial Osseointegration
Source: Research Square preprint supplement (doi:10.21203/rs.3.rs-5132912/v1), 2024-10-01
Supplement: Supplementary file 533 [file 9_Nuclear factor erythroid derived 2 like 2 signaling pathway(WP2376).heatmap-data.xls]

id	S1	S2	S3	C1	C2	C3
Gstm3	0.0081228983791406	0.0080650039932596	0.0082522090443715	1e-08	1e-08	1e-08
Aldh3a1	256.48413177516	268.6109734930572	245.0680812140824	11.74033943253099	11.197347357430212	10.51090523339905
Nqo1	894.6821790485358	921.6159441269632	909.0405393737236	68.69985844488146	66.05850646634667	68.18367461601659
Gstp1	500.321704418056	516.810635737434	494.17870100634735	106.72428525443492	104.0905111195828	101.34004741539319
Fth1	14914.332884871563	16299.8905266539	14676.117161457576	3809.538481670412	3841.849768844073	3548.319284142597
Fosl1	24.703374062744132	24.37180079975734	23.04261589782227	5.758594847672313	6.872155783441542	6.604240436214102
Gstm1	45.53356173657048	47.60950914159571	41.930834386865364	17.383676510575278	16.833479050644716	16.562118897759337
Gstt2	8.915766994142976	10.588618807247506	9.458328754669271	3.640612021513944	4.239471827179759	4.166588951125471
Txn1	1801.482000403252	1918.7279351240743	1955.465842161412	769.0254400063637	804.1178857869768	791.8071832400535
Map2k6	0.22134924565490088	0.2197716198812422	0.2186264985749171	0.0839284269067529	0.0699342314121426	0.1146979195394138
Pik3r1	16.383475819057892	15.501270229910459	16.875801974644048	7.005672301545564	7.250801604137134	8.172077605732419
Mgst2	75.23429643871205	72.3663347352602	79.29501471889036	40.535484855496456	38.940315416410634	40.39656830118608
Gsr	31.639221044314738	32.404927902106515	31.349725024476232	17.13424760016886	18.089473346522333	16.880811046501314
Ugdh	84.03266388035601	78.45609812032014	85.26667399098302	43.47436771005562	47.12044772723125	49.44002708489082
Ftl1	3550.724809984261	3383.20598950582	2984.75692629994	1822.522812197148	1926.2764799390402	1863.586854963693
Akr7a3	0.4439666279724079	0.2644814067664575	0.1653792364736082	0.0748167538675707	0.029273562897626202	0.0746117751412639
Gss	34.939512042608754	37.94958637422828	36.38249310677115	22.300517309841652	21.59494495130185	23.317919882185667
Gstm2	190.81332753780092	209.34083083854833	197.98897462861916	134.8681416964187	122.22953430163864	122.6735895171186
Bach1	6.801214275300225	5.938283931131903	6.507404916242575	3.7715072477877865	3.9538021307513858	4.570484456042501
Cdkn1a	225.2471563782602	244.81389495302528	229.08205393192696	155.36096672887274	156.42312077928767	141.03910800197
Taldo1	101.98632160099055	106.30278066545539	100.236527380618	64.4298316571581	69.4745956682061	68.91685713413774
Gstk1	15.442317156866364	17.245510632799856	15.366339812473305	10.889714702697928	11.513611450671727	9.475777362165873
Fmo1	0.2286173029329181	0.3999310109852946	0.1769575104273509	0.16511282405256988	0.0215345776488285	0.0109773731472204
Ephx1	45.319731234279345	45.19775983300025	45.16997640846202	29.85443993719645	31.594232956250934	31.69423714606367
G6pd	176.03552063079954	185.07424321680028	165.43586536021175	128.1649342683324	122.96607704568807	112.71279863880531
Gstm5	57.71216179150389	55.46675787139734	56.18557516785085	40.29845609223954	41.1352242235911	36.660305605650834
Brca1	0.6395991068216977	0.8326806294901333	0.7293461024966188	0.4718321763974695	0.5809525482108846	0.5067348206617265
Pik3c3	3.667386609764701	3.602234618268305	3.451658688836476	2.4579688405026903	2.479459253104619	2.7233005471618323
Abcc3	4.7216918130703815	5.121846462774731	5.009471271879777	3.794087142028275	3.8311178027735378	3.0173280219152794
Akr7a2	42.29341159133722	48.47408237555653	38.38383684719526	33.33314480193121	32.68095681403804	26.850639092348104
Fyn	17.069757806378995	17.605484554039734	18.19351665680005	12.305411731068364	13.471291463288452	13.956672136557605
Prkcd	21.118847153613842	20.74457908714249	22.378984886497918	16.584802076850767	16.700452485654615	15.175962029215619
Psmc6	36.34676219004507	33.87018123191189	38.045754384230975	26.668142857387103	25.98529080131754	29.70687141622505
Prkca	9.316841770358932	9.24258726021399	9.066203536910672	6.635572306714202	6.949536254440923	7.6485364330296575
Prdx1	447.2552595970184	452.4212760041954	472.44969781711336	360.2002338081598	355.0956036077844	365.6222735471245
Sqstm1	193.04521941651043	197.2642533867092	186.49629933767545	152.13993426738693	153.4818407400715	148.9585475476784
Psmc3	138.3223079604702	145.37802076591848	134.58005642524108	108.13683384883	112.43324906975691	109.3664067202914
Xpo1	26.71475668331078	26.95162229932712	28.96738407860952	21.86842853813684	21.921987591412076	22.530101980530898
Sod1	252.26410909380928	272.6012017096636	240.69963390859544	206.81650059654024	204.7887688347477	204.4500109767816
Jun	20.180822618803965	19.29234408498486	18.496194628591486	14.61707348545869	15.940556545850256	16.22842065300743
Prkcq	0.24924442710731678	0.2474679835826503	0.2944328155611141	0.2461535075716404	0.19491815903682588	0.1987211861901962
Ube2k	14.725393930409137	13.103559555506457	16.07297387782288	11.668935050534287	11.771096073575217	12.827160355730618
Mafg	8.971446070643884	8.428239776143002	8.89373536065879	7.0553362809182305	7.203624607244575	7.525618048663361
Pmf1	10.719706811470537	11.038895914924792	8.673735664210225	8.460047201179158	8.725770585253976	8.188162953707941
Nqo2	9.743366781237112	8.980320728364187	10.446314409499896	7.769788565688095	8.109319632572237	8.51470082694921
Mapk3	90.68227442303372	100.31036398697587	85.37399712077665	79.47662132913044	81.85347769599866	72.78668334012438
Gstm6	0.2286746508052204	0.2889661248945785	0.4646299702419197	0.27325519392370007	0.3289740899733238	0.1257722567701727
Vcp	218.7289433646191	228.86953546536833	222.4819982365529	198.74699194485612	191.6460254400684	189.36209114536186
Psmc2	89.19012003458919	83.344403684756	85.92068854577239	74.85358933282703	76.43961392380159	74.43620805681391
Map2k7	10.043511501020252	9.63887758104423	10.44394873639393	8.539084376752077	8.736529241447121	9.059526337374805
Prkce	4.200860965792414	4.373527614445829	4.332073439388372	3.6214416864189976	4.092207820711258	3.5831385677498524
Akr1b10	0.5632412417560401	0.09868709834569299	0.28049394906649977	0.2233335737837933	0.2075363924831711	0.23385778133829
Slc35b1	81.2613804765428	80.51915075879624	74.63773230179194	70.52586681439658	69.13431257831579	67.41215321102496
Mgst1	51.87658773490025	57.53424392368	55.479048761836644	49.45046317094978	46.5257799760386	48.6260027746506
Nfe2l2	34.42668228732223	33.22088378787013	37.06154730638201	30.986601428485567	28.98005504654327	32.40948549323653
Akr1a1	460.671539943115	497.2681060886449	441.51504359507084	430.2759250910437	419.78172679746126	395.1793259993877
Mapk7	9.212935695356405	9.933744013900572	9.390550201754596	8.2556407126285	8.92519441893144	8.263742603103452
Psmc5	86.82626653934504	87.74065385792002	89.14229791610191	81.30395968124336	77.92947064305967	77.54062450339305
Cbr1	9.75926620687095	6.875835550131843	8.776882790908942	7.07148221030167	8.883788649974605	7.052108159259232
Cbr1l2	1.1176119763092083	0.8463404796526641	0.3463943170865396	0.5362864300427473	0.4683768563620199	0.8595275444273607
Ldhb	14.2269697706955	17.225900103424188	14.979341666745341	13.912326542440807	13.77384662022301	14.514040416605251
Pik3c2a	5.774668686997847	5.637226335575331	6.070673304463163	4.8793211507734116	5.439656997003079	5.631933228971193
Gsto1	37.64005338831383	38.39298650302365	42.06318219626341	36.79711499758453	36.0373128192774	35.43851973402807
Mafk	3.668911856361288	3.5368494508693047	3.517143571714864	3.0854118854287758	3.6638898798353225	3.0834776268687265
Prkcz	0.026245958226708003	0.13029443540375998	0.07554734486861839	0.0840358131987493	0.08220174730720829	0.0088216485905059
Map3k7	11.827166636448508	11.048326984497356	11.776247199526336	10.502593159808812	10.222751614197712	11.543909947406107
Mapk1	15.253876836690662	15.382008646431204	16.54507058531675	14.759410907995575	14.620207773677492	14.694649485138859
Gclm	8.179169961176264	6.856925111352601	6.935257894377122	5.824443296034541	6.106526098322033	8.552273304686812
Usp14	29.306648890364425	28.50833443055676	31.28098703896969	27.65261485046531	26.78939412749981	28.917994846621802
Gstm4	8.724759852552545	10.708853470305307	10.236238399082136	10.129926645841307	8.572564630310662	9.270908699893225
Ran	111.56322650825108	117.13068813450336	115.29619884644636	110.64320721165923	109.60546379520004	104.75335571827928
Crebbp	3.5835240921886493	3.65836515699468	3.6108989054446017	3.5347521787580263	3.099846772857092	3.651934057866932
Ubb	681.1635601195136	725.2742506757249	658.0120537394453	660.2172587608743	680.0600604145363	623.6212910225618
Slc1a4	39.88285290574444	40.0226135131139	39.36079823647511	38.3949334160271	38.14361542891098	36.97394246316984
Cdc34	22.667303463584236	25.16346022216245	21.784167949146482	21.997832289908242	22.390835419368965	22.09549134900762
Gstt1	2.353354628552995	2.6142899875421732	2.1066637354923627	2.5550451447686897	2.2035652138620483	2.129854389266712
Nras	21.39425343649268	21.71283539950477	22.665206884837648	21.03514939487302	20.117724060987502	23.030211207378024
Mapk14	25.36185508163248	25.973621599907055	25.642937088349232	25.8743005520766	25.31623295217376	24.20042114771716
Hras	17.833924304644963	17.42853688688946	16.0402887807215	17.4443389221126	17.043085607565825	15.983469066829116
Eif2ak3	7.935456628768548	7.115476944007387	8.227025037511572	7.455510339784237	7.863154185498939	7.5941233829126595
Dnajb4	21.098873434033624	22.22454557570006	23.964488681884138	20.68360069685681	23.224641600246407	22.99381048097528
Psmc4	60.98986174996781	62.73628600408321	61.551907838910296	64.88921899723928	59.99005147216097	60.33196103527587
Prkci	19.77481173430757	18.975751856800265	21.521912958935648	19.74457255735731	19.84956309454905	21.297755142969546
Pik3r2	19.532663833307623	20.95827346985304	18.37146464057553	19.5986826937952	21.12867162822361	18.799340405466985
Mapk9	10.23249110572806	10.210942603663616	10.524431321739188	10.46512770377505	10.427503613191798	10.488638212413484
Map3k1	1.0153180563953428	0.8742929632542151	0.9964617817164328	0.9600624088088489	1.0103947420938226	1.0143092364836728
Rras2	41.93258478709561	42.696174690085044	47.97176612641912	46.896209085910385	43.973882927196286	46.270534096364344
Dnajc5	24.98592005081613	27.56169693019425	25.875371836473928	28.613875447653946	26.502691454108792	26.02026653253513
Ep300	8.647866598402242	7.773088311417752	8.22427567948344	8.398703638627852	8.800256737578108	8.31130799750288
Pik3ca	7.066312384567878	6.579668634713721	7.182432427650098	7.058149316806675	7.292771667296387	7.9213649609059456
Actb	4024.870591861198	4373.085949730487	3911.985913364068	4588.973979297553	4562.296785633169	4186.84035351396
Aldoa	1.7942501927787586	2.438558644092389	1.7630490194984327	3.2268787020274003	2.152787999490029	1.4829667705717058
Gsk3b	12.812115293646215	12.582416230124974	12.986687460235611	13.480973494090053	13.71994594824775	14.894510353793144
Abcc4	6.100276530260542	5.716240374865907	6.006296244204341	6.7125303009222375	6.7119423566208445	6.363151668901065
Prkd3	7.991030543534085	7.1069997681356085	8.095774664951684	8.459975530766409	8.767483785690052	8.771295936943112
Map2k1	44.78033666227869	47.639303452254495	47.620307915801284	55.14271123091328	50.43724744694714	52.250342798556254
Gsto2	0.409320566576471	0.2477124366352509	0.4079159635853361	0.4927016489039893	0.3007358843516426	0.4795593302362438
Actg1	1004.9900081797816	1030.0562814238456	961.6641816116764	1195.4489166139979	1173.9654500667714	1149.816226584511
Tp53	39.50341128406762	35.939405464852236	37.07621340535638	44.760803150360324	46.297627485826496	42.42578257351217
LOC100361457	118.94461495838262	112.93088490001708	108.27946144235443	125.7014575093517	137.33782386924267	146.6778156252665
Raf1	22.056806721073112	22.496358092562122	22.123931305127766	27.12835700717631	26.916461635349847	26.292939395318143
Sod3	112.81009662986364	117.09910023057367	106.14287333013404	143.03958685291937	140.0801232691668	129.0477503807296
Pik3r6	0.0039150595412028	0.0038871557490661	0.0039773843740646	0.0395855887659104	0.0038721730816965	0.0039477224413367
Pik3c2g	1e-08	1e-08	1e-08	1e-08	1e-08	0.0077249197614509
Rras	37.434807857262385	40.42834889880702	33.86070596798062	50.005303053414906	50.0274724805149	43.281475658067535
Abcc1	14.596121718933738	14.119964157997781	14.898542318262848	18.5994974850937	18.534603592136406	18.817621941942836
Mgst3	6.742804274128404	6.1965325140794745	5.989894209068197	7.895891601215947	8.747170253317192	8.348611823422488
Prkcg	0.021279021121271703	0.1267641034101196	0.0972799209993652	0.1559872899575503	0.1631058540487824	0.10728270982118379
Hmox1	182.4629089033856	195.83333053188144	187.53347604882936	256.40644083247014	267.26417318913246	244.55506837417047
Mapk8	2.6659496772435154	2.675410426577563	3.4489325277603538	3.830120415534581	3.97334561948756	4.666138763905404
Scarb1	7.715161165497477	6.488950309667205	5.537809091084192	9.599628503992529	10.105197538983715	8.72918683568745
Herpud1	44.27192022875558	44.541864871988324	39.734792911948794	65.89606545167497	62.74186012851386	63.668706263878576
Pik3c2b	0.0552173972964057	0.037379897890107705	0.0968938077681826	0.11927537864196139	0.1464608640139875	0.12147941561477779
Pik3cd	1.9560092775532383	1.958118333142459	1.7900750831274208	3.2117950974844507	3.6613175664738877	2.87291590279214
Prkcb	0.030140949376508002	0.0374076542511166	0.0535863433511407	0.1676174525037758	0.0819796213819171	0.2051487267138603
Slc2a1	17.540103626642768	20.064814875453752	18.12784907941745	35.842250752682645	35.997482080769316	34.519178099452226
Dhcr7	5.4628726182259975	5.501299020539356	4.960552244328873	10.460666501758341	10.609120899260377	9.401900828385816
Sod2	36.096385181968124	38.65114198566309	35.09840084574602	76.21815387892553	73.12576042991049	71.00294040438285
Pik3r3	5.6630445400355	4.95810393301635	5.538457950367612	10.476848710488392	11.306549137355438	10.949904437798812
Acta1	10.240993071034794	9.827989470498299	9.658511308183185	24.436014205424772	23.225298176711732	19.20584941716172
Slc7a11	0.2494349971314409	0.3135659624241975	0.4107626642420311	1.3301884524947083	1.456341236476079	1.5314079157114406
Acta2	477.2646447564055	513.0454583460424	470.61894808874536	2576.4505323985486	2548.322585931704	2414.875298098977
Actg2	34.450285215755954	38.05572411634197	35.37725995326843	195.98347739380085	193.04630821729322	182.7571957242582
Pik3r5	0.17120536662389088	0.14422981055430528	0.1159538935923634	1.043893579125089	0.9903235348451996	0.889325168563707
