# Supplementary material for: Peptide-based Self-adaptive Implant Coating Sequentially Regulates Bone Regeneration to Enhance Interfacial Osseointegration
Source: Research Square preprint supplement (doi:10.21203/rs.3.rs-5132912/v1), 2024-10-01
Supplement: Supplementary file 537 [file TFs_S-vs-C.xls]

TFs	Group	Gene_number	Genes
AF-4	ALL	4	Aff1;Aff2;Aff3;Aff4
AF-4	DEG	0	--
AF-4	Up	0	--
AF-4	Down	0	--
AP-2	ALL	5	Tfap2a;Tfap2b;Tfap2c;Tfap2d;Tfap2e
AP-2	DEG	1	Tfap2c
AP-2	Up	0	--
AP-2	Down	1	Tfap2c
ARID	ALL	11	Arid1a;Arid1b;Arid2;Arid3a;Arid3b;Arid3c;Arid4a;Arid4b;Arid5a;Arid5b;Jarid2
ARID	DEG	0	--
ARID	Up	0	--
ARID	Down	0	--
CBF	ALL	1	Cbfb
CBF	DEG	0	--
CBF	Up	0	--
CBF	Down	0	--
CG-1	ALL	2	Camta1;Camta2
CG-1	DEG	0	--
CG-1	Up	0	--
CG-1	Down	0	--
COE	ALL	4	Ebf1;Ebf2;Ebf3;Ebf4
COE	DEG	1	Ebf4
COE	Up	0	--
COE	Down	1	Ebf4
CP2	ALL	6	Grhl1;Grhl2;Grhl3;Tfcp2;Tfcp2l1;Ubp1
CP2	DEG	1	Grhl1
CP2	Up	1	Grhl1
CP2	Down	0	--
CSD	ALL	8	Carhsp1;Csdc2;Csde1;Lin28a;Lin28b;Ybx1;Ybx2;Ybx3
CSD	DEG	0	--
CSD	Up	0	--
CSD	Down	0	--
CSL	ALL	2	Rbpj;Rbpjl
CSL	DEG	1	Rbpjl
CSL	Up	0	--
CSL	Down	1	Rbpjl
CSRNP_N	ALL	3	Csrnp1;Csrnp2;Csrnp3
CSRNP_N	DEG	0	--
CSRNP_N	Up	0	--
CSRNP_N	Down	0	--
CTF_NFI	ALL	4	Nfia;Nfib;Nfic;Nfix
CTF_NFI	DEG	0	--
CTF_NFI	Up	0	--
CTF_NFI	Down	0	--
CUT	ALL	7	Cux1;Cux2;Onecut1;Onecut2;Onecut3;Satb1;Satb2
CUT	DEG	1	Onecut2
CUT	Up	0	--
CUT	Down	1	Onecut2
DACH	ALL	2	Dach1;Dach2
DACH	DEG	0	--
DACH	Up	0	--
DACH	Down	0	--
DM	ALL	7	Dmrt1;Dmrt2;Dmrt3;Dmrta1;Dmrta2;Dmrtb1;Dmrtc2
DM	DEG	0	--
DM	Up	0	--
DM	Down	0	--
E2F	ALL	10	E2f2;E2f3;E2f4;E2f5;E2f6;E2f7;E2f8;Necab3;Tfdp1;Tfdp2
E2F	DEG	3	E2f7;E2f8;Necab3
E2F	Up	3	E2f7;E2f8;Necab3
E2F	Down	0	--
ESR-like	ALL	9	Ar;Esr1;Esr2;Esrra;Esrrb;Esrrg;Nr3c1;Nr3c2;Pgr
ESR-like	DEG	1	Pgr
ESR-like	Up	1	Pgr
ESR-like	Down	0	--
ETS	ALL	28	Ehf;Elf1;Elf2;Elf3;Elf4;Elf5;Elk1;Elk3;Elk4;Erf;Erfl;Erg;Ets1;Ets2;Etv1;Etv2;Etv3;Etv3l;Etv4;Etv5;Etv6;Fev;Fli1;Gabpa;Spdef;Spi1;Spib;Spic
ETS	DEG	2	Elf5;Spi1
ETS	Up	0	--
ETS	Down	2	Elf5;Spi1
Family	ALL	1	id
Family	DEG	0	--
Family	Up	0	--
Family	Down	0	--
Fork_head	ALL	42	Foxa1;Foxa2;Foxa3;Foxb2;Foxc1;Foxc2;Foxd1;Foxd2;Foxd3;Foxe1;Foxe3;Foxf1;Foxf2;Foxg1;Foxh1;Foxi1;Foxi2;Foxi3;Foxj2;Foxj3;Foxk1;Foxk2;Foxl1;Foxl2;Foxl3;Foxm1;Foxn1;Foxn2;Foxn3;Foxn4;Foxo1;Foxo3;Foxo4;Foxo6;Foxp1;Foxp2;Foxp3;Foxp4;Foxq1;Foxr1;Foxr2;Foxs1
Fork_head	DEG	2	Foxo3;Foxq1
Fork_head	Up	2	Foxo3;Foxq1
Fork_head	Down	0	--
GCFC	ALL	2	Gcfc2;Paxbp1
GCFC	DEG	0	--
GCFC	Up	0	--
GCFC	Down	0	--
GCM	ALL	2	Gcm1;Gcm2
GCM	DEG	0	--
GCM	Up	0	--
GCM	Down	0	--
GCNF-like	ALL	1	Nr6a1
GCNF-like	DEG	0	--
GCNF-like	Up	0	--
GCNF-like	Down	0	--
GTF2I	ALL	3	Gtf2i;Gtf2ird1;Gtf2ird2
GTF2I	DEG	0	--
GTF2I	Up	0	--
GTF2I	Down	0	--
HMG	ALL	53	Bbx;Cic;Hbp1;Hmg20a;Hmg20b;Hmgb1;Hmgb2l1;Hmgb3;Hmgb4;Hmgxb3;Hmgxb4;Kmt2c;Kmt2d;Lef1;Mael;Meiosin;Nsd2;Pbrm1;Pms1;RGD1566225;Smarce1;Sox10;Sox11;Sox12;Sox13;Sox14;Sox15;Sox17;Sox18;Sox1;Sox21;Sox2;Sox30;Sox3;Sox4;Sox5;Sox6;Sox7;Sox8;Sox9;Sry3;Sry;Ssrp1;Tcf7;Tcf7l1;Tcf7l2;Tfam;Tox2;Tox3;Tox4;Tox;Ubtf;Wdhd1
HMG	DEG	7	Sox11;Sox4;Sox5;Sox6;Sox8;Tox3;Wdhd1
HMG	Up	2	Sox5;Wdhd1
HMG	Down	5	Sox11;Sox4;Sox6;Sox8;Tox3
HMGA	ALL	2	Hmga1;Hmga2
HMGA	DEG	1	Hmga2
HMGA	Up	1	Hmga2
HMGA	Down	0	--
HPD	ALL	2	Prox1;Prox2
HPD	DEG	0	--
HPD	Up	0	--
HPD	Down	0	--
HSF	ALL	6	Hsf1;Hsf2;Hsf3;Hsf4;Hsf5;Hsfy2
HSF	DEG	0	--
HSF	Up	0	--
HSF	Down	0	--
HTH	ALL	2	Lcor;Lcorl
HTH	DEG	0	--
HTH	Up	0	--
HTH	Down	0	--
Homeobox	ALL	184	Adnp;Alx1;Alx3;Alx4;Arx;Barhl1;Barhl2;Barx1;Barx2;Bsx;Cdx1;Cdx2;Cdx4;Crx;Dbx1;Dbx2;Dlx1;Dlx2;Dlx3;Dlx4;Dlx5;Dlx6;Dmbx1;Drgx;Dux4;Emx1;Emx2;En1;En2;Evx1;Evx2;Gbx1;Gbx2;Gsc2;Gsc;Gsx1;Gsx2;Hdx;Hesx1;Hhex;Hlx;Hmbox1;Hmx1;Hmx2;Hmx3;Hnf1a;Hnf1b;Homez;Hopx;Hoxa10;Hoxa11;Hoxa13;Hoxa1;Hoxa2;Hoxa3;Hoxa4;Hoxa5;Hoxa6;Hoxa7;Hoxa9;Hoxb13;Hoxb1;Hoxb2;Hoxb3;Hoxb4;Hoxb5;Hoxb6;Hoxb7;Hoxb8;Hoxb9;Hoxc10;Hoxc11;Hoxc1…
Homeobox	DEG	12	Dlx3;Hhex;Hopx;Hoxc11;Hoxd13;Lhx2;Lhx3;Meox2;Pknox2;Six3;Vax2;Zhx3
Homeobox	Up	5	Dlx3;Hopx;Hoxd13;Lhx2;Zhx3
Homeobox	Down	7	Hhex;Hoxc11;Lhx3;Meox2;Pknox2;Six3;Vax2
IRF	ALL	9	Irf1;Irf2;Irf3;Irf4;Irf5;Irf6;Irf7;Irf8;Irf9
IRF	DEG	1	Irf4
IRF	Up	0	--
IRF	Down	1	Irf4
LRRFIP	ALL	2	Lrrfip1;Lrrfip2
LRRFIP	DEG	0	--
LRRFIP	Up	0	--
LRRFIP	Down	0	--
MBD	ALL	9	Baz2a;Baz2b;Mbd1;Mbd2;Mbd3;Mbd4;Mecp2;Setdb1;Setdb2
MBD	DEG	0	--
MBD	Up	0	--
MBD	Down	0	--
MH1	ALL	8	Smad1;Smad2;Smad3;Smad4;Smad5;Smad6;Smad7;Smad9
MH1	DEG	1	Smad9
MH1	Up	1	Smad9
MH1	Down	0	--
MYB	ALL	27	Cdc5l;Dmtf1;Dnajc1;Dnajc2;Mier1;Mier2;Mier3;Mis18bp1;Mybl1;Mybl2;Myb;Mysm1;Ncor1;Ncor2;Rcor1;Rcor2;Rcor3;Smarcc1;Smarcc2;Snapc4;Tada2a;Tada2b;Terb1;Terf1;Terf2;Ttf1;Zzz3
MYB	DEG	1	Terf1
MYB	Up	1	Terf1
MYB	Down	0	--
Miscellaneous	ALL	2	Nr0b1;Nr0b2
Miscellaneous	DEG	0	--
Miscellaneous	Up	0	--
Miscellaneous	Down	0	--
NCU-G1	ALL	1	Glmp
NCU-G1	DEG	0	--
NCU-G1	Up	0	--
NCU-G1	Down	0	--
NDT80_PhoG	ALL	2	Myrfl;Myrf
NDT80_PhoG	DEG	0	--
NDT80_PhoG	Up	0	--
NDT80_PhoG	Down	0	--
NF-YA	ALL	1	Nfya
NF-YA	DEG	0	--
NF-YA	Up	0	--
NF-YA	Down	0	--
NF-YB	ALL	1	Nfyb
NF-YB	DEG	0	--
NF-YB	Up	0	--
NF-YB	Down	0	--
NF-YC	ALL	1	Nfyc
NF-YC	DEG	0	--
NF-YC	Up	0	--
NF-YC	Down	0	--
NGFIB-like	ALL	3	Nr4a1;Nr4a2;Nr4a3
NGFIB-like	DEG	2	Nr4a1;Nr4a3
NGFIB-like	Up	0	--
NGFIB-like	Down	2	Nr4a1;Nr4a3
Nrf1	ALL	1	Nrf1
Nrf1	DEG	0	--
Nrf1	Up	0	--
Nrf1	Down	0	--
Others	ALL	71	Adnp2;Ahctf1;Akna;Blzf1;Capn15;Carf;Casz1;Cc2d1a;Cebpz;Ciz1;Cnbp;Cpeb1;Crebl2;Crebrf;Epas1;Fam170a;Gabpb1;Gabpb2;Gon4l;Gpbp1;Hif1a;Khsrp;L3mbtl3;Ltf;Lyar;Maf1;Mideas;Mllt10;Myef2;Nfrkb;Nkrf;Nme2;Parp12;Phtf1;Plek;Plscr2;Prdm11;Preb;Pura;Purb;Purg;Rag1;Rbck1;Rfxank;RGD1306271;Setbp1;Sfpq;Smarcal1;Spz1;Tax1bp1;Tcf19;Tcf25;Tet2;Tfb1m;Tmf1;Xpa;Yeats4;Zfp280b;Zfp280c;Zfp280d;Zfp318;Zfp326;Zfp395;Zfp48…
Others	DEG	5	Akna;Epas1;Hif1a;Plek;Setbp1
Others	Up	1	Epas1
Others	Down	4	Akna;Hif1a;Plek;Setbp1
P53	ALL	3	Tp53;Tp63;Tp73
P53	DEG	0	--
P53	Up	0	--
P53	Down	0	--
PAX	ALL	9	Pax1;Pax2;Pax3;Pax4;Pax5;Pax6;Pax7;Pax8;Pax9
PAX	DEG	1	Pax8
PAX	Up	0	--
PAX	Down	1	Pax8
PC4	ALL	1	Sub1
PC4	DEG	0	--
PC4	Up	0	--
PC4	Down	0	--
Pou	ALL	13	Pou1f1;Pou2f1;Pou2f2;Pou2f3;Pou3f1;Pou3f2;Pou3f3;Pou3f4;Pou4f1;Pou4f2;Pou4f3;Pou5f1;Pou6f1
Pou	DEG	1	Pou6f1
Pou	Up	0	--
Pou	Down	1	Pou6f1
RFX	ALL	8	Rfx1;Rfx2;Rfx3;Rfx4;Rfx5;Rfx6;Rfx7;Rfx8
RFX	DEG	0	--
RFX	Up	0	--
RFX	Down	0	--
RHD	ALL	10	Nfat5;Nfatc1;Nfatc2;Nfatc3;Nfatc4;Nfkb1;Nfkb2;Rela;Relb;Rel
RHD	DEG	0	--
RHD	Up	0	--
RHD	Down	0	--
RXR-like	ALL	12	Hnf4a;Hnf4g;Nr2c1;Nr2c2;Nr2e1;Nr2e3;Nr2f1;Nr2f2;Nr2f6;Rxra;Rxrb;Rxrg
RXR-like	DEG	1	Nr2f2
RXR-like	Up	1	Nr2f2
RXR-like	Down	0	--
Runt	ALL	3	Runx1;Runx2;Runx3
Runt	DEG	0	--
Runt	Up	0	--
Runt	Down	0	--
SAND	ALL	7	Deaf1;Gmeb1;Gmeb2;Samd11;Sp100;Sp110;Sp140
SAND	DEG	2	Samd11;Sp100
SAND	Up	2	Samd11;Sp100
SAND	Down	0	--
SF-like	ALL	2	Nr5a1;Nr5a2
SF-like	DEG	0	--
SF-like	Up	0	--
SF-like	Down	0	--
SRF	ALL	5	Mef2a;Mef2b;Mef2c;Mef2d;Srf
SRF	DEG	0	--
SRF	Up	0	--
SRF	Down	0	--
STAT	ALL	6	Stat2;Stat3;Stat4;Stat5a;Stat5b;Stat6
STAT	DEG	0	--
STAT	Up	0	--
STAT	Down	0	--
T-box	ALL	17	Eomes;Mga;Tbr1;Tbx10;Tbx15;Tbx18;Tbx19;Tbx1;Tbx20;Tbx21;Tbx22;Tbx2;Tbx3;Tbx4;Tbx5;Tbx6;Tbxt
T-box	DEG	0	--
T-box	Up	0	--
T-box	Down	0	--
TEA	ALL	4	Tead1;Tead2;Tead3;Tead4
TEA	DEG	1	Tead2
TEA	Up	0	--
TEA	Down	1	Tead2
TF_Otx	ALL	2	Otx1;Otx2
TF_Otx	DEG	0	--
TF_Otx	Up	0	--
TF_Otx	Down	0	--
TF_bZIP	ALL	48	Atf1;Atf2;Atf3;Atf4;Atf5;Atf6b;Atf6;Atf7;Bach1;Bach2;Batf2;Batf3;Batf;Cebpb;Cebpd;Cebpe;Creb1;Creb3l1;Creb3l2;Creb3l3;Creb3l4;Creb5;Crebzf;Crem;Dbp;Ddit3;Fosb;Fosl1;Fosl2;Fos;Hlf;Jdp2;Jund;Jun;Mafa;Mafb;Maff;Mafg;Maf;Nfe2l1;Nfe2l2;Nfe2l3;Nfe2;Nfil3;Nfilz;Nrl;Tef;Xbp1
TF_bZIP	DEG	7	Atf3;Atf4;Batf3;Dbp;Ddit3;Fosb;Fosl1
TF_bZIP	Up	3	Batf3;Fosb;Fosl1
TF_bZIP	Down	4	Atf3;Atf4;Dbp;Ddit3
THAP	ALL	8	Thap11;Thap12;Thap1;Thap2;Thap3;Thap4;Thap6;Thap7
THAP	DEG	0	--
THAP	Up	0	--
THAP	Down	0	--
THR-like	ALL	20	Nr1d1;Nr1d2;Nr1h2;Nr1h3;Nr1h4;Nr1h5;Nr1i2;Nr1i3;Ppara;Ppard;Pparg;Rara;Rarb;Rarg;Rora;Rorb;Rorc;Thra;Thrb;Vdr
THR-like	DEG	0	--
THR-like	Up	0	--
THR-like	Down	0	--
TSC22	ALL	4	Tsc22d1;Tsc22d2;Tsc22d3;Tsc22d4
TSC22	DEG	1	Tsc22d3
TSC22	Up	1	Tsc22d3
TSC22	Down	0	--
Tub	ALL	5	Tub;Tulp1;Tulp2;Tulp3;Tulp4
Tub	DEG	0	--
Tub	Up	0	--
Tub	Down	0	--
ZBTB	ALL	46	Bcl6b;Bcl6;Gzf1;Hic1;Hic2;Mynn;Patz1;Zbtb10;Zbtb11;Zbtb16;Zbtb17;Zbtb18;Zbtb1;Zbtb20;Zbtb21;Zbtb22;Zbtb24;Zbtb25;Zbtb26;Zbtb2;Zbtb32;Zbtb33;Zbtb34;Zbtb37;Zbtb38;Zbtb39;Zbtb3;Zbtb40;Zbtb42;Zbtb43;Zbtb44;Zbtb45;Zbtb46;Zbtb47;Zbtb48;Zbtb49;Zbtb4;Zbtb5;Zbtb6;Zbtb7a;Zbtb7b;Zbtb7c;Zbtb8a;Zbtb8b;Zfp131;Zfp161
ZBTB	DEG	2	Zbtb16;Zbtb18
ZBTB	Up	1	Zbtb16
ZBTB	Down	1	Zbtb18
bHLH	ALL	102	Ahr;Ahrr;Arnt2;Arnt;Ascl1;Ascl2;Ascl3;Ascl4;Ascl5;Atoh1;Atoh7;Atoh8;Bhlha15;Bhlha9;Bhlhe22;Bhlhe23;Bhlhe40;Bhlhe41;Clock;Ferd3l;Figla;Hand1;Hand2;Helt;Hes1;Hes2;Hes3;Hes5;Hes6;Hes7;Hey1;Hey2;Heyl;Id1;Id2;Id3;Id4;Lyl1;Max;Mesp1;Mesp2;Mitf;Mlx;Mlxip;Mnt;Msc;Msgn1;Mxd1;Mxd3;Mxd4;Mxi1;Myc;Mycl;Mycn;Mycs;Myf5;Myf6;Myod1;Myog;Ncoa1;Neurod1;Neurod2;Neurod4;Neurod6;Neurog1;Neurog2;Neurog3;Nhlh1;Nhlh2;Npa…
bHLH	DEG	12	Ahrr;Atoh8;Bhlhe41;Id1;Id2;Id4;Myc;Mycl;Npas4;Scx;Sim2;Srebf1
bHLH	Up	8	Ahrr;Atoh8;Id1;Id2;Id4;Myc;Mycl;Sim2
bHLH	Down	4	Bhlhe41;Npas4;Scx;Srebf1
zf-BED	ALL	3	Zbed4;Zc3h11a;Zfta
zf-BED	DEG	0	--
zf-BED	Up	0	--
zf-BED	Down	0	--
zf-C2H2	ALL	373	Aebp2;Bcl11a;Bcl11b;Bnc1;Bnc2;Ctcf;E4f1;Egr1;Egr2;Egr3;Egr4;Fezf1;Fezf2;Fiz1;Gfi1b;Gfi1;Giot1;Gli1;Gli2;Gli3;Gli4;Glis1;Glis2;Glis3;Gtf3a;Hinfp;Hivep1;Hivep2;Hivep3;Ikzf1;Ikzf2;Ikzf3;Ikzf4;Ikzf5;Insm1;Jazf1;Klf10;Klf11;Klf12;Klf13;Klf14;Klf15;Klf16;Klf17;Klf1;Klf2;Klf3;Klf4;Klf5;Klf6;Klf7;Klf8;Klf9;Maz;Mbtps2;Mecom;Mtf1;Mzf1;Osr1;Osr2;Ovol1;Ovol2;Ovol3;Peg3;Plag1;Plagl1;Plagl2;Prdm10;Prdm12;Prdm1…
zf-C2H2	DEG	12	Egr1;Ikzf2;Klf10;Klf9;Prdm8;RGD1559747;Tshz2;Wt1;Zfp474;Zfp566;Zfp711;Zim1
zf-C2H2	Up	8	Egr1;Ikzf2;Klf10;Klf9;RGD1559747;Tshz2;Wt1;Zfp474
zf-C2H2	Down	4	Prdm8;Zfp566;Zfp711;Zim1
zf-C2HC	ALL	4	L3mbtl1;Myt1l;Myt1;St18
zf-C2HC	DEG	0	--
zf-C2HC	Up	0	--
zf-C2HC	Down	0	--
zf-CCCH	ALL	3	Mkrn2;Zfp36l1;Zfp36l2
zf-CCCH	DEG	0	--
zf-CCCH	Up	0	--
zf-CCCH	Down	0	--
zf-GATA	ALL	15	Gata1;Gata2;Gata3;Gata4;Gata5;Gata6;Gatad1;Gatad2a;Gatad2b;Mta1;Mta2;Mta3;Rere;Trps1;Zglp1
zf-GATA	DEG	2	Gata4;Zglp1
zf-GATA	Up	1	Gata4
zf-GATA	Down	1	Zglp1
zf-LITAF-like	ALL	2	Cdip1;Litaf
zf-LITAF-like	DEG	0	--
zf-LITAF-like	Up	0	--
zf-LITAF-like	Down	0	--
zf-MIZ	ALL	6	Pias1;Pias2;Pias3;Pias4;Zmiz1;Zmiz2
zf-MIZ	DEG	0	--
zf-MIZ	Up	0	--
zf-MIZ	Down	0	--
zf-NF-X1	ALL	2	Nfx1;Nfxl1
zf-NF-X1	DEG	0	--
zf-NF-X1	Up	0	--
zf-NF-X1	Down	0	--
