# Supplementary material for: Peptide-based Self-adaptive Implant Coating Sequentially Regulates Bone Regeneration to Enhance Interfacial Osseointegration
Source: Research Square preprint supplement (doi:10.21203/rs.3.rs-5132912/v1), 2024-10-01
Supplement: Supplementary file 541 [file Target_Statistics_diff-S-vs-C_TF_regulation.xls]

Family	TF	targets_up_down	targets_num
CSL	Rbpjl|Down	Down	1
MYB	Terf1|Up	Down	1
Others	Akna|Down	Down	1
PAX	Pax8|Down	Down	1
zf-C2H2	Klf10|Up	Down	1
