# Supplementary material for: Peptide-based Self-adaptive Implant Coating Sequentially Regulates Bone Regeneration to Enhance Interfacial Osseointegration
Source: Research Square preprint supplement (doi:10.21203/rs.3.rs-5132912/v1), 2024-10-01
Supplement: Supplementary file 545 [file diff-S-vs-C_TF_regulation.xls]

TF_id	TF_up_down	Target	Target_up_down	Function
Steap1	Up	Pax8	Down	regulation
Ier3	Down	Pax8	Down	regulation
Ncf1	Down	Pax8	Down	regulation
Nuf2	Up	Pax8	Down	regulation
Atp1b1	Up	Pax8	Down	regulation
Ercc6l	Up	Pax8	Down	regulation
Rasd1	Up	Pax8	Down	regulation
Nek2	Up	Pax8	Down	regulation
Klf10	Up	Pax8	Down	regulation
Tcp11l2	Up	Pax8	Down	regulation
Akna	Down	Pax8	Down	regulation
Tmem176b	Down	Pax8	Down	regulation
Csrp1	Down	Pax8	Down	regulation
Adamts15	Up	Pax8	Down	regulation
Sema5a	Down	Pax8	Down	regulation
Blnk	Down	Pax8	Down	regulation
Edn1	Down	Pax8	Down	regulation
Lbp	Down	Pax8	Down	regulation
Neurl3	Down	Pax8	Down	regulation
Tgfa	Up	Pax8	Down	regulation
Plcd4	Up	Pax8	Down	regulation
Vegfa	Down	Pax8	Down	regulation
Mllt11	Down	Pax8	Down	regulation
Cenpu	Up	Pax8	Down	regulation
Adamts9	Up	Pax8	Down	regulation
Pax8	Down	Pax8	Down	regulation
Hk3	Down	Pax8	Down	regulation
Rbpjl	Down	Pax8	Down	regulation
Crip1	Down	Pax8	Down	regulation
Adgrl1	Down	Pax8	Down	regulation
Bcam	Down	Pax8	Down	regulation
Msmo1	Down	Pax8	Down	regulation
Cpm	Down	Pax8	Down	regulation
Enho	Down	Pax8	Down	regulation
Nav3	Up	Pax8	Down	regulation
Acta2	Down	Pax8	Down	regulation
Emb	Up	Pax8	Down	regulation
Loxl3	Up	Pax8	Down	regulation
Tspan13	Down	Sox6	Down	regulation
Gadd45a	Down	Sox6	Down	regulation
Terf1	Up	Sox6	Down	regulation
S100a6	Up	Sox6	Down	regulation
Fam180a	Up	Sox6	Down	regulation
Sapcd2	Up	Sox6	Down	regulation
Edn1	Down	Sox6	Down	regulation
Tent5c	Down	Sox6	Down	regulation
LOC497940	Down	Sox6	Down	regulation
Il17b	Down	Sox6	Down	regulation
Inava	Down	Sox6	Down	regulation
Ciart	Down	Sox6	Down	regulation
LOC102549726	Down	Sox6	Down	regulation
Rnf39	Up	Pgr	Up	regulation
Ppl	Up	Pgr	Up	regulation
Cenpf	Up	Pgr	Up	regulation
Sorcs2	Down	Pgr	Up	regulation
Agbl5	Down	Pgr	Up	regulation
Map3k6	Up	Pgr	Up	regulation
Enpp5	Down	Pgr	Up	regulation
Cebpa	Up	Pgr	Up	regulation
Tmem86a	Down	Pgr	Up	regulation
Tmbim1	Up	Pgr	Up	regulation
LOC497940	Down	Pgr	Up	regulation
Dctpp1	Up	Pgr	Up	regulation
Slc26a2	Down	Pgr	Up	regulation
Vegfa	Down	Pgr	Up	regulation
Pinlyp	Up	Pgr	Up	regulation
Cenpu	Up	Pgr	Up	regulation
Fth1	Up	Pgr	Up	regulation
Adgrl1	Down	Pgr	Up	regulation
Thnsl1	Down	Pgr	Up	regulation
Mns1	Up	Pgr	Up	regulation
Cdkn1c	Up	Pgr	Up	regulation
