# Supplementary material for: Peptide-based Self-adaptive Implant Coating Sequentially Regulates Bone Regeneration to Enhance Interfacial Osseointegration
Source: Research Square preprint supplement (doi:10.21203/rs.3.rs-5132912/v1), 2024-10-01
Supplement: Supplementary file 549 [file report_Filtered_data_stat.xls]

Sample	RawReads(M)	RawBases(G)	CleanReads(M)	CleanBases(G)	ValidBases(%)	Q30(%)	GC(%)
C1	50.69	7.38	48.47	7.06	95.61	95.41	51.45
C2	50.32	7.31	47.96	6.97	95.30	95.64	51.65
C3	49.71	7.27	47.65	6.97	95.87	95.79	50.01
S1	49.00	7.17	47.07	6.89	96.06	95.42	51.74
S2	49.70	7.23	47.38	6.89	95.33	95.33	51.46
S3	49.15	7.18	47.13	6.89	95.89	95.50	51.60
