# Supplementary material for: Peptide-based Self-adaptive Implant Coating Sequentially Regulates Bone Regeneration to Enhance Interfacial Osseointegration
Source: Research Square preprint supplement (doi:10.21203/rs.3.rs-5132912/v1), 2024-10-01
Supplement: Supplementary file 553 [file genome_mapping_stat.xls]

Sample	Total reads	Total mapped reads	Multiple mapped	Uniquely mapped	Read-1	Read-2	Reads map to '+'	Reads map to '-'	Non-splice reads	Splice reads	Reads mapped in proper pairs
C1	48465816	47712082(98.44%)	1700348(3.51%)	46011734(94.94%)	23007957(47.47%)	23003777(47.46%)	23007878(47.47%)	23003856(47.46%)	24001841(49.52%)	22009893(45.41%)	45524346(93.93%)
C2	47956614	47254040(98.53%)	1676274(3.50%)	45577766(95.04%)	22795771(47.53%)	22781995(47.51%)	22791251(47.52%)	22786515(47.51%)	23790507(49.61%)	21787259(45.43%)	45123266(94.09%)
C3	47652558	46868680(98.36%)	1726931(3.62%)	45141749(94.73%)	22576900(47.38%)	22564849(47.35%)	22573049(47.37%)	22568700(47.36%)	25240072(52.97%)	19901677(41.76%)	44640518(93.68%)
S1	47067748	46327667(98.43%)	1708256(3.63%)	44619411(94.80%)	22312920(47.41%)	22306491(47.39%)	22311898(47.40%)	22307513(47.39%)	22337557(47.46%)	22281854(47.34%)	44135418(93.77%)
S2	47379224	46634304(98.43%)	1733430(3.66%)	44900874(94.77%)	22452518(47.39%)	22448356(47.38%)	22451442(47.39%)	22449432(47.38%)	22464780(47.41%)	22436094(47.35%)	44417304(93.75%)
S3	47130898	46414920(98.48%)	1688986(3.58%)	44725934(94.90%)	22371858(47.47%)	22354076(47.43%)	22365684(47.45%)	22360250(47.44%)	22234390(47.18%)	22491544(47.72%)	44248924(93.89%)
