# Supplementary material for: Peptide-based Self-adaptive Implant Coating Sequentially Regulates Bone Regeneration to Enhance Interfacial Osseointegration
Source: Research Square preprint supplement (doi:10.21203/rs.3.rs-5132912/v1), 2024-10-01
Supplement: Supplementary file 557 [file 0-GSEA.xlsx]

## Sheet: Sheet1
gene	E1	E2	E3	C1	C2	C3
AKT1	67.6704	64.8892	64.8164	65.5608	65.7101	52.2782
AKT2	14.7476	13.4209	13.714	16.5983	16.673	14.1973
AKT3	7.84362	8.14071	7.76987	7.87605	7.56047	10.7541
ANGPT1	0.00570047	0	0	0	0.00566107	0
ANGPT4	0	0.00526074	0.00524536	0	0	0.00539125
ARRB2	47.1108	40.8027	43.5792	34.6231	37.3843	35.5805
ARTN	0.323446	0.135952	0.237221	0.0835959	0.152152	0.226403
ATF4	88.5987	90.2239	94.1593	44.3586	46.1552	44.0039
BDNF	1.193	1.43561	1.13749	1.06147	1.14956	1.57092
BRAF	2.19948	2.07861	1.74332	2.43184	2.65457	4.11424
CACNA1A	0	0	0.00282922	0	0	0
CACNA1B	0	0	0	0	0	0.0104081
CACNA1D	0.00223647	0	0	0	0	0
CACNA1G	0.0392975	0.117688	0.0874331	0.0635683	0.0711648	0.0780405
CACNA1H	0.00538552	0.0241929	0.0375234	0.0185124	0.0294156	0.0247931
CACNA1S	0	0	0.0245523	0	0	0
CACNA2D1	0.0440773	0.0253852	0.016874	0.0532793	0.0505068	0.0398896
CACNA2D2	0.244749	0.214838	0.302415	0.182353	0.163435	0.151096
CACNA2D3	0.203765	0.209974	0.215903	0.238856	0.208884	0.356397
CACNA2D4	0.00263884	0.00526854	0	0	0	0
CACNB1	2.72962	2.3722	2.4279	2.2768	2.10996	2.05971
CACNB3	10.1256	9.66579	9.12377	10.7388	10.7006	8.97268
CACNB4	0.111091	0.133078	0.106889	0.195177	0.170388	0.406614
CACNG6	0.235604	0.137198	0.107483	0.0964138	0.175482	0.20086
CACNG7	19.5607	20.7276	20.352	14.2285	16.5068	16.727
CACNG8	0.734497	0.865263	0.529405	0.807048	0.863566	0.973098
CDC25B	120.064	110.838	116.318	107.52	110.372	104.969
CDC42	26.5586	30.4148	30.4834	27.88	27.2229	31.0985
CHUK	3.85473	3.78249	3.73702	3.96918	3.61522	5.06115
CRK	40.2302	41.7298	40.8223	40.6738	42.4704	44.8696
CRKL	22.6442	22.2792	23.9404	24.9913	24.9554	22.727
CSF1	4.84833	4.97452	4.65547	5.46445	4.80966	4.79556
DAXX	38.3122	35.4078	38.5993	37.111	38.144	35.6388
DDIT3	23.8271	28.9567	27.7357	10.652	8.14642	11.139
DUSP16	4.09383	4.3026	3.80937	4.74622	4.75625	4.98816
DUSP2	0.166036	0.138124	0.06886	0.0951229	0	0.0707752
DUSP4	0.0890333	0.0957161	0.201098	0.0470841	0.0646131	0.0420389
DUSP5	17.0627	16.5213	17.9242	9.69717	9.8753	10.9343
DUSP6	13.0192	13.5108	13.3072	11.9907	11.3744	11.022
DUSP7	9.41083	9.60906	9.19745	9.08978	8.97047	8.16452
DUSP9	1.40747	1.09661	1.67428	0.960875	1.2699	0.913102
EFNA2	0.640621	0.526367	0.500304	0.382341	0.621511	0.418433
EGF	0.0978101	0.0542449	0.0612979	0.00711569	0.0431707	0.0444725
ELK1	36.9484	32.505	34.245	36.8579	35.7521	33.7742
EPHA2	52.727	49.8875	48.4355	47.5341	47.972	38.2484
ERBB2	19.005	18.284	18.501	20.4834	20.0901	15.5663
ERBB4	0.0495255	0.0454846	0.041408	0.169268	0.121974	0.261438
EREG	24.7812	26.5323	26.0788	20.4374	21.7266	29.5425
FASLG	0.013798	0	0	0.0542054	0.0548104	0
FGF1	0.306465	0.32633	0.10168	0.110362	0.0760865	0.0627048
FGF17	0	0	0.010935	0	0	0
FGF18	0.0249303	0.0622178	0.0868504	0.416239	0.297095	0.586605
FGF2	1.28662	1.58898	1.24039	2.02541	1.98961	3.28313
FGF20	0.135355	0.0270242	0.175144	0.0265871	0.13442	0.15232
FGF21	0.073958	0.0184575	0.0184036	0	0	0
FGF22	0	0.07483	0	0.220859	0.223325	0.0191716
FGF5	0.735343	0.633572	0.727568	0.653418	0.569429	0.577645
FGF7	0	0	0.00465882	0	0	0
FGF8	0.260474	0.240022	0.0797734	0.157427	0.0994899	0.10249
FGFR1	6.15164	6.03075	5.13702	4.32551	4.32541	4.02056
FGFR3	0.44026	0.739915	0.682282	0.48165	0.271185	0.416194
FGFR4	9.10654	7.20668	6.63769	7.72345	8.20795	7.03148
FLNA	470.792	451.042	449.957	363.633	370.547	276.948
FLNB	211.152	204.489	208.234	159.73	156.594	125.92
FLNC	1.1176	1.29482	1.27209	0.980116	1.00186	0.620355
FLT1	0.00824681	0	0	0	0	0.00843677
FLT3LG	2.80955	3.24047	2.97475	3.00118	2.72343	2.56508
FLT4	0.019714	0	0.00327039	0	0	0
FOS	0.568183	1.01623	0.671581	0.883542	0.658298	0.69026
GADD45A	48.9265	47.7569	51.1194	26.7217	24.221	21.5969
GADD45B	8.79195	9.50297	9.72171	10.8695	10.3452	10.2613
GADD45G	0	0	0.0231895	0	0	0
GDNF	0	0	0	0	0	0.00560595
GNG12	38.6453	39.7045	36.9271	37.6519	38.6116	50.4506
GRB2	44.0352	41.6042	42.9141	44.3392	43.421	37.7943
HRAS	100.452	97.239	102.759	97.0059	98.6187	71.0785
HSPA1L	0.784492	0.459079	0.709043	0.859029	0.591018	0.488917
HSPA6	0.0634531	0.0422289	0.0631582	0.0103865	0.0105024	0.0108191
HSPB1	319.603	299.531	315.437	293.805	310.295	222.425
IGF1	0	0	0.00598108	0	0	0
IGF1R	6.30299	6.38297	6.02215	6.70679	6.77612	6.94244
IGF2	0.644104	0.66179	0.648609	0.647388	0.63217	0.566458
IKBKB	7.08402	6.80767	6.52028	6.65221	7.14348	6.52549
IKBKG	4.47993	4.13108	4.36463	3.59818	3.93997	4.15588
IL1A	0.0355283	0.248268	0.306481	0.127942	0.0352827	0.0121156
IL1B	21.814	24.6565	24.9158	8.87479	8.75344	11.1258
IL1R1	5.94541	5.49521	5.11363	5.1106	5.29528	5.65408
IL1RAP	4.68602	4.74017	4.51654	4.60859	4.34182	6.0832
INSR	2.45609	2.29696	2.38447	1.55217	1.83847	1.78092
IRAK1	52.0343	48.9935	50.1491	49.1296	49.7242	40.633
IRAK4	2.64444	2.50858	2.73121	1.83268	2.14258	2.52354
JUN	31.6039	29.9309	31.7843	29.0263	32.0613	25.1974
KDR	0.00426973	0	0	0	0.00848044	0
KRAS	11.2693	11.6619	10.8563	11.7661	11.278	17.0236
LAMTOR3	2.53009	3.71598	3.62407	3.12464	2.62812	3.57016
MAP2K1	14.1212	13.3057	14.7032	12.673	12.3858	13.2734
MAP2K3	21.3602	17.7842	16.9874	17.0154	16.0907	15.4642
MAP2K5	1.98935	1.72999	1.94693	1.629	1.665	1.7362
MAP2K6	0.0435439	0.0886758	0.0641454	0.119743	0.0830263	0.087312
MAP3K10	4.59782	4.4408	4.42163	3.76404	4.34978	2.78787
MAP3K11	23.6822	23.3184	20.9484	28.4506	27.5395	21.3296
MAP3K12	4.38737	3.80214	3.90543	3.33583	3.98707	3.45451
MAP3K13	0.528646	0.570138	0.429877	0.451979	0.607021	0.548066
MAP3K14	5.02632	5.04451	4.54717	5.52378	5.72453	4.75631
MAP3K20	6.62032	6.95149	6.24792	5.51683	5.74163	6.95827
MAP3K21	1.26415	1.46946	1.19071	1.51236	1.73988	2.36954
MAP3K3	5.58929	5.63374	5.17084	6.42364	6.26039	5.06253
MAP3K4	5.45382	4.73157	5.43664	4.74372	4.99228	5.35694
MAP3K5	3.5901	4.07123	3.71919	4.73197	5.0794	5.48998
MAP3K6	6.99252	6.36062	6.95125	6.32695	5.8116	4.45073
MAP3K8	1.89411	1.88135	1.6457	1.97847	2.36543	2.44324
MAP3K9	3.07259	2.87172	2.70806	3.05151	3.06215	3.2714
MAP4K1	0.111223	0.0170816	0.0766425	0.0168053	0.0594752	0.0875268
MAP4K2	9.32025	7.99506	8.49053	7.4794	7.51405	6.51649
MAP4K3	2.80609	2.75895	2.56117	3.28632	3.43341	4.35484
MAP4K4	29.0502	30.3488	30.6379	26.8102	26.8169	28.1692
MAPK1	24.7374	24.3635	24.8548	26.6403	26.3967	29.3967
MAPK10	0	0.00398455	0.0013243	0.00392011	0	0.0108891
MAPK11	25.9457	25.8391	22.9237	23.0237	23.9047	18.0714
MAPK12	26.5022	28.5538	26.1838	21.5024	23.2448	17.6118
MAPK13	5.89472	4.81325	5.32583	6.03087	5.61714	4.87929
MAPK14	8.89804	8.84046	8.95131	9.47214	9.3191	9.92793
MAPK3	30.1863	26.6285	27.5052	24.8846	26.6512	23.0058
MAPK8	3.17043	3.45777	3.17969	3.83596	3.83887	4.76037
MAPK8IP1	20.1856	18.7404	19.5391	24.2276	23.6384	18.0525
MAPK8IP2	9.70361	9.36857	9.93236	10.4437	9.68424	9.06041
MAPK9	6.07737	5.75867	5.66681	5.18606	5.66817	6.04476
MAPKAPK2	21.9707	20.0934	21.004	21.7783	22.2109	21.8642
MAPKAPK3	38.8386	34.2655	38.0288	34.796	31.6318	27.4358
MAPKAPK5	1.50703	2.01113	1.60957	1.35657	1.52561	1.40618
MAPT	3.92194	3.44757	3.29484	2.72581	2.71458	2.25288
MAX	14.8733	14.3123	15.6782	14.7066	13.7055	14.8343
MECOM	0.128025	0.312078	0.133357	0.204688	0.215843	0.444703
MEF2C	0.108261	0.0891604	0.0484908	0.0159488	0.0268781	0.0304575
MET	47.2037	52.1292	46.5276	51.7334	49.6459	58.2053
MKNK1	3.37	3.19487	2.99942	3.8564	3.81956	4.06152
MKNK2	52.979	51.504	54.7202	41.7011	44.2433	37.6193
MRAS	2.01544	2.32755	2.16778	1.99235	1.90557	2.03042
MYD88	18.0131	19.0327	20.2617	21.3139	21.3427	20.8814
NF1	7.83035	7.91055	6.58065	10.937	11.3706	14.6015
NFATC1	5.1128	4.49958	5.18505	4.13931	4.13927	3.84891
NFKB1	17.7361	17.7166	17.2094	22.6739	21.5695	20.7931
NFKB2	65.647	60.5096	61.7048	49.8337	49.9904	40.6612
NGF	1.85978	2.11491	2.03684	2.13982	1.94853	1.47776
NGFR	13.7973	13.343	13.9514	0.308623	0.544304	0.284097
NLK	4.06918	4.13905	4.58705	4.45731	5.05653	6.15481
NR4A1	1.22714	1.15387	1.11965	0.800426	0.907838	0.675257
NRAS	32.309	33.4255	32.8465	30.5215	32.5888	40.545
NRTN	0.048898	0.0162711	0.113565	0.0320159	0.0485599	0
NTF4	0.389484	0.345609	0.290755	0.286892	0.676886	0.409524
NTRK1	0.0086748	0.0432989	0.00863448	0.00851974	0.00861484	0.00887463
PAK1	17.1322	16.3811	15.5155	14.8497	14.0499	15.2449
PAK2	28.7479	28.6981	27.0742	29.3978	29.4484	31.6736
PDGFA	3.35172	3.7488	4.20082	3.24479	3.19269	2.70816
PDGFC	6.24115	6.55074	7.08695	7.46317	7.63473	9.00657
PDGFD	0.0973373	0.168426	0.238983	0.184822	0.27066	0.424872
PDGFRA	0	0	0	0.0121285	0	0
PDGFRB	0.0738387	0.0476953	0.0216163	0.0127974	0.030194	0.0044435
PGF	3.64914	3.69486	3.89162	2.06075	1.99315	1.53328
PLA2G4A	0.984726	1.17143	1.14351	1.04772	0.994217	1.67062
PLA2G4B	0.00923789	0	0	0.0544366	0.100914	0.122859
PLA2G4C	1.30167	1.59024	1.16606	1.38798	1.46503	0.951184
PLA2G4D	0	0	0	0.00572972	0	0
PLA2G4E	0.00439093	0.0175333	0	0	0	0.00898415
PPM1A	2.41467	2.5324	2.66497	2.9712	2.87206	3.87865
PPP3CA	7.59554	9.09169	7.86224	7.60119	7.16512	10.3221
PPP3CB	8.52945	7.67181	7.98128	6.76603	7.21007	7.93366
PPP3CC	2.80971	3.01144	2.74912	2.21228	1.94451	1.46572
PPP3R1	29.4928	30.3625	30.8476	27.4368	27.3177	30.9136
PPP5C	44.1131	43.3258	45.197	41.7561	42.0829	37.0705
PRKCA	5.28843	5.16111	4.9024	5.09538	4.86934	5.41025
PSPN	0.390812	0.283735	0.707264	0.523399	0.246979	0.545201
PTPN7	0	0	0.0062005	0	0	0.00637295
PTPRR	0.0612829	0.0672945	0.060998	0.0300937	0	0
RAC1	192.432	188.085	182.695	194.41	203.113	192.396
RAC2	1.01254	1.20691	1.33876	0.178108	0.405216	0.340133
RAC3	38.9594	39.3931	39.4921	35.094	34.0378	30.0027
RAF1	24.1882	25.2167	25.3509	29.1717	27.2639	28.0718
RAP1A	6.0693	7.34548	6.49174	5.66438	5.0957	6.30926
RAP1B	8.65464	9.11325	8.99218	7.88236	7.27566	9.75044
RAPGEF2	2.09406	2.17225	1.7886	2.23975	2.18946	3.08767
RASA2	1.39973	1.60444	1.28832	2.06369	1.87739	3.55804
RASGRF1	0.167896	0.16514	0.110591	0.0897221	0.0588477	0.0429408
RASGRF2	0.00539837	0.00269451	0	0	0.00536105	0
RASGRP1	0.0890007	0.138206	0.142723	0.339927	0.333901	0.379378
RASGRP2	2.46417	1.84762	2.35097	1.23648	0.972444	0.930214
RASGRP3	0.0146588	0.0109751	0	0.0071984	0.00363938	0.00374913
RELA	51.0232	50.4078	51.7301	47.4606	50.8842	46.1764
RET	0.0259084	0.0554219	0.025788	0.0327153	0.0367561	0.0302916
RPS6KA1	24.4696	23.4568	25.7705	26.5079	24.7731	23.2158
RPS6KA2	1.62708	1.54058	1.7333	1.4745	1.38878	1.39948
RPS6KA3	2.80868	3.01769	2.58821	2.93718	2.93499	4.72591
RPS6KA4	30.9486	27.0798	28.7838	26.7592	25.6662	19.989
RRAS	164.992	161.302	176.117	146.017	149.127	116.775
SRF	14.8142	13.0952	13.4328	12.9519	11.4695	9.69951
STK3	1.16643	1.25543	1.42791	1.29569	1.0918	1.40179
STK4	14.0738	15.659	13.7779	12.373	12.3076	13.827
STMN1	197.816	202.423	211.353	147.884	146.736	131.894
TAB1	10.1606	9.56041	9.46793	10.4311	10.2835	7.64173
TAOK2	9.63854	9.59988	10.1488	10.8572	11.6743	9.48896
TEK	0	0	0.00519589	0	0	0
TGFB1	87.1553	82.7074	86.1712	80.6491	83.1579	69.7172
TGFB2	0.117162	0.150377	0.104123	0.201369	0.228549	0.273968
TGFB3	0.318891	0.229204	0.279319	0.0939571	0.228014	0.23489
TGFBR1	4.12942	3.96154	3.71819	4.04588	4.0689	5.84391
TNFRSF1A	58.7436	53.613	54.3985	47.1679	46.4841	38.8252
TP53	10.3038	11.1386	10.8018	9.53682	8.44679	8.37038
TRADD	18.9505	16.3048	17.0763	15.8391	14.3019	11.9502
TRAF2	10.9141	10.5195	10.3859	12.1685	11.6961	8.39488
TRAF6	2.17363	2.19595	2.11932	2.28617	2.31687	3.16985
VEGFA	52.8222	53.9097	55.1693	29.4669	29.7046	30.7682
VEGFB	32.4942	30.0551	32.6179	33.0653	31.79	28.401
VEGFC	5.41325	4.94163	5.31127	6.30182	5.85757	5.03039
VEGFD	0	0	0.0718886	0	0	0
A1BG	0.0368205	0.022054	0.0293194	0.00723246	0.0438791	0
A2M-AS1	0	0.0756677	0.0323343	0.106349	0.0537678	0.0443114
A3GALT2	0.2678	0.218729	0	0.0478205	0.145063	0.0747186
A4GALT	6.05973	5.10962	6.18885	9.09581	8.94489	7.94947
AAAS	31.9447	29.8855	29.5051	28.4164	26.1553	22.5492
AACS	13.7586	12.7245	12.8207	14.9962	14.9197	14.0831
AADAC	0	0	0	0	0	0.0152478
AADACL2-AS1	1.54852	2.70522	1.50921	2.81989	1.89023	2.31028
AADAT	3.11109	3.14723	3.37814	2.3202	2.82523	3.28487
AAGAB	14.3612	15.3963	15.3915	14.6457	13.9616	14.6921
AAK1	1.62567	1.70629	1.68139	1.70182	1.74419	2.08341
AAMDC	3.05118	2.88718	2.93526	2.37203	2.91355	1.8783
AAMP	69.7723	65.9315	69.7818	68.5983	67.2546	57.2485
AANAT	0.024747	0.00494083	0	0.068053	0.0245759	0.00506341
AAR2	19.1058	19.4774	19.8006	19.8744	19.8175	16.7787
AARS1	139.809	133.556	140.046	77.1809	76.6751	67.0817
AARS2	6.76244	6.43621	6.12719	5.84255	5.56217	4.16633
AASDH	1.17065	1.34411	0.908344	1.24523	1.17742	1.61851
AASDHPPT	6.58201	6.86351	6.70019	6.90474	6.74542	9.63322
AASS	3.99337	5.3422	4.25025	5.88717	5.9867	9.2465
AATF	76.407	70.2461	71.9283	57.1172	56.2434	47.2759
AATK	0.460708	0.29759	0.566465	0.354881	0.367813	0.425113
ABALON	0.261748	0.169842	0.312638	0.359897	0.519878	0.374889
ABAT	0.171339	0.142535	0.133998	0.108178	0.0891286	0.0500817
ABCA1	0.820767	1.14422	1.02893	1.53229	1.4781	2.06858
ABCA10	0.246549	0.148455	0.268775	0.288264	0.20598	0.27625
ABCA12	0.267489	0.253937	0.276687	0.844786	0.588576	1.09192
ABCA13	0	0	0	0	0	0.000896866
ABCA2	13.8839	13.4111	13.0019	15.0223	15.3329	11.6402
ABCA3	10.9211	9.94189	9.53735	14.6605	14.1948	11.0607
ABCA4	0	0.0237494	0.0135314	0.0133516	0.00337516	0.00347695
ABCA5	0.935103	1.08337	0.964841	0.97789	1.01235	1.87017
ABCA6	0.0519674	0.019454	0.00646573	0.0127596	0.0225786	0.0132911
ABCA7	6.05767	5.99345	6.23312	6.87282	6.82479	5.47029
ABCA8	0.0161174	0	0.0280743	0.0356159	0.00800298	0.00824431
ABCA9	0	0.0033707	0.00336085	0.00331618	0.0033532	0.0345432
ABCB1	0.0347537	0.00433669	0.00432402	0.0127997	0.0301993	0.00444428
ABCB10	3.88832	4.60819	4.05613	4.4208	4.19908	5.06054
ABCB11	0	0	0	0.00320034	0	0
ABCB4	0.00311006	0.00310468	0.015478	0.0183268	0.0185314	0.0063634
ABCB5	0.00322441	0	0	0	0	0
ABCB6	2.54904	2.59468	1.94657	2.53631	2.58952	1.9665
ABCB7	7.72364	8.23511	8.23263	7.35136	7.51954	8.72221
ABCB8	11.3283	9.79278	10.7121	10.7777	10.9768	8.75284
ABCB9	1.19407	0.841412	1.03029	1.16546	1.13074	0.839595
ABCC1	10.2026	10.5519	10.3774	10.7827	11.2579	9.81207
ABCC10	3.24636	2.46403	2.41105	2.83825	2.94225	2.6624
ABCC11	0.0151416	0.0201538	0.00251186	0.0297418	0.0225554	0.0206538
ABCC12	0	0.0126236	0	0	0	0
ABCC2	0.194653	0.119317	0.0407891	0.157634	0.217047	0.129264
ABCC3	25.7988	24.7422	25.0846	39.5084	40.1072	37.6165
ABCC4	7.32733	7.99391	7.0926	10.8131	11.6596	13.9642
ABCC5	3.65267	3.62345	3.67307	4.58103	4.61766	4.99594
ABCC6	0.178533	0.220843	0.193156	0.434543	0.254385	0.321615
ABCC9	0.00265035	0	0	0	0	0
ABCD1	1.74453	1.84315	1.99317	1.98001	1.86729	1.5486
ABCD2	0.00257726	0	0	0.0012656	0	0.00659157
ABCD3	6.88553	7.87937	7.32915	6.29315	6.25477	10.8666
ABCD4	10.1414	10.6084	11.841	11.5737	10.4347	9.82491
ABCE1	10.303	12.1913	10.0383	11.8305	10.0282	16.5185
ABCF1	40.2435	39.7358	40.9156	39.2081	37.6845	33.8523
ABCF1-DT	0.0458662	0.0915737	0.045653	0.585603	0.227746	0.563073
ABCF2	5.42449	4.90984	5.48689	6.27309	5.74212	5.14984
ABCF3	14.8506	14.1447	13.5121	15.7434	15.1036	12.8691
ABCG1	0.0238453	0.0584281	0.0431536	0.0298061	0.0301388	0.0487892
ABCG2	0.0134478	0	0.0223088	0.00880496	0.0222581	0.0183435
ABCG4	0.834387	0.460311	0.590098	0.431301	0.397955	0.325719
ABHD1	0.20238	0.23991	0.314749	0.149072	0.276349	0.310562
ABHD10	14.0337	15.8105	14.5146	10.5586	10.15	11.3314
ABHD11	15.382	15.3674	14.6986	13.1417	13.9708	10.976
ABHD11-AS1	0.26327	0	0.314456	0.206851	0.10458	0.0538669
ABHD12	29.2307	28.2515	27.328	25.2367	25.1874	22.3467
ABHD13	1.30241	1.73725	1.63614	1.53423	1.36342	2.72556
ABHD14A	6.75202	6.64704	7.65082	8.26047	8.02785	5.71247
ABHD14B	45.5696	43.1442	42.6112	36.6551	36.7699	31.7417
ABHD15	5.8626	5.88805	4.88409	6.27615	5.25545	5.93928
ABHD16A	9.83783	9.62824	9.4401	10.3356	10.5574	8.6392
ABHD16B	0.083519	0.0333498	0	0.0328104	0.0663533	0.102531
ABHD17A	12.6333	10.6097	11.8048	11.3477	11.2169	9.34737
ABHD17B	1.87236	2.12427	2.33105	2.23586	2.46742	3.29586
ABHD17C	3.1224	3.117	3.62237	3.10803	2.79702	3.05403
ABHD18	0.800871	0.654651	0.661402	0.823604	0.829915	1.0568
ABHD2	11.6614	11.3473	10.9379	9.25943	9.77313	9.44344
ABHD3	4.0938	4.43701	4.69846	3.90575	4.63799	4.99154
ABHD4	8.91051	8.76151	7.85056	9.30012	8.4737	7.86758
ABHD5	2.09042	2.19684	1.91408	1.87261	1.7962	1.97567
ABHD6	3.7717	3.33112	4.19702	3.52552	3.92638	3.65169
ABHD8	8.86689	9.21681	9.05634	8.80423	9.3022	6.99988
ABI1	17.0667	17.4471	17.4819	15.8254	17.6234	19.0782
ABI2	12.7724	13.5087	12.5366	12.3917	11.6656	14.4105
ABI3	0	0	0	0	0.0557368	0
ABI3BP	0.00663966	0.0364549	0.0264352	0.0391258	0.0296719	0.0169815
ABITRAM	10.4596	11.5552	10.1102	9.70189	9.00228	12.4363
ABL1	14.5848	13.3967	14.2085	14.2681	14.0205	12.0708
ABL2	5.00913	4.54163	4.6022	4.33514	4.24258	4.90344
ABLIM1	0.747506	0.673504	0.597133	0.943093	0.900323	0.913748
ABLIM2	0.306042	0.0972086	0.212311	0.323342	0.156568	0.113852
ABLIM3	4.3	3.45606	3.71875	3.24857	3.60705	3.22919
ABR	30.4541	28.7966	28.5475	33.6584	32.0693	27.9975
ABRACL	48.489	56.1664	53.2422	57.3707	53.7645	57.0561
ABRAXAS1	2.61265	3.06738	2.67965	2.36513	1.92338	3.13767
ABRAXAS2	3.81871	4.26353	4.04269	3.85737	3.44302	5.68867
ABT1	11.069	10.391	10.3943	10.4639	10.6228	7.96491
ABTB1	17.3566	15.4733	14.7491	13.9929	16.1926	12.6652
ABTB2	15.5474	15.2519	14.4846	17.0448	17.704	14.8303
ACAA1	31.8959	26.6719	29.6013	28.7075	31.1812	25.7821
ACAA2	50.5853	56.9385	57.4329	47.3655	43.6677	46.4213
ACACA	10.089	10.0171	9.36959	13.6675	13.3871	13.2869
ACACB	0.88512	0.754632	0.669088	0.643751	0.582041	0.504148
ACAD10	5.36507	5.64086	5.2978	5.93155	5.84691	4.76139
ACAD11	0.400829	0.615593	0.245517	0.287678	0.443988	0.43372
ACAD8	4.81177	5.46169	5.06435	5.57464	5.28733	5.16418
ACAD9	18.0675	17.8002	18.1555	20.0575	20.5523	15.786
ACADL	0.00761166	0.00759849	0.0454577	0	0.00755905	0
ACADM	11.0562	13.3116	12.1649	9.848	10.4689	14.0393
ACADS	7.9737	6.60423	6.32451	6.79109	6.9535	3.93848
ACADSB	2.38066	2.90797	2.13645	2.01604	2.08507	2.90168
ACADVL	160.148	152.278	152.404	124.114	122.896	98.4218
ACAP1	0.727594	0.932457	0.763359	0.54077	0.585863	0.331942
ACAP2	4.5177	5.35803	4.26266	4.945	5.14652	8.7015
ACAP3	3.28967	3.0328	2.93797	3.90212	3.87482	2.7277
ACAT1	19.9895	24.2683	23.0904	20.5226	20.6462	21.2833
ACAT2	28.051	26.5279	27.9206	36.8447	33.4937	31.8033
ACBD3	13.092	15.4418	14.2208	11.5135	12.1596	16.351
ACBD3-AS1	0	0	0	0.221861	0.112169	0.115551
ACBD4	2.25533	2.63773	2.93696	3.2958	2.53997	2.17119
ACBD5	3.71062	4.061	3.90036	3.43049	3.53009	4.53737
ACBD6	29.7786	30.227	29.0458	29.4354	24.3315	22.2671
ACBD7	2.66051	3.43055	4.03842	1.61132	1.67334	1.65576
ACBD7-DCLRE1CP1	0	0	0	0	0.0248076	0
ACCS	1.33733	1.5027	1.80697	2.42381	2.23914	2.28023
ACCSL	0	0	0	0.0131013	0	0
ACD	23.4801	21.5224	22.1327	16.5361	17.0326	16.0881
ACE	0.031692	0.0632742	0.0630893	0.0400185	0.035969	0.0370537
ACE2	0.00542128	0	0	0	0	0
ACER2	0.472595	0.459252	0.420445	0.225913	0.323961	0.539103
ACER3	5.16882	5.36876	5.21234	6.17892	6.14118	7.72934
ACHE	0.808431	0.622972	0.96702	0.250731	0.288742	0.609408
ACIN1	34.6342	33.1287	33.1277	35.5027	39.1869	37.0195
ACKR2	0.0333182	0.0166303	0.0331633	0.0327226	0.0496318	0.0511285
ACKR4	0	0	0	0	0.00965386	0
ACLY	73.8194	70.8206	73.1932	83.8519	86.7209	77.2818
ACO1	13.2872	13.5469	13.5106	16.7842	16.9454	15.4222
ACO2	37.1666	34.7037	35.3721	33.4788	33.1218	26.2933
ACOT1	2.06672	2.40541	2.25618	3.71346	3.26308	2.58201
ACOT11	0.932905	0.940925	0.854924	0.714027	0.8402	0.714151
ACOT13	6.29249	6.7352	7.52275	6.12352	5.62637	5.35472
ACOT2	12.7868	11.156	13.0925	16.1224	16.1462	12.3441
ACOT4	3.53605	2.91898	3.36732	2.7716	3.62979	2.90444
ACOT6	0	0	0	0	0.0145575	0
ACOT7	66.4749	57.8661	61.6974	57.4657	57.9797	41.4554
ACOT8	20.3661	18.3888	20.5336	23.9029	23.2037	23.2193
ACOT9	15.8211	16.8243	15.9485	17.9005	18.7361	16.7874
ACOX1	4.6894	4.42894	4.53858	4.7679	4.63768	4.46256
ACOX2	0.225295	0.122676	0.122317	0.100576	0.0508495	0.0419063
ACOX3	3.09763	2.92351	3.40492	3.41827	3.68356	2.83835
ACOXL	0.011716	0.0116958	0.0014577	0.0129449	0.00145438	0.00149824
ACOXL-AS1	0.00775385	0	0	0.00761525	0.00770025	0.0475947
ACP1	35.4332	40.3719	39.4573	35.2741	32.8588	35.5013
ACP2	25.2217	26.0275	27.1241	34.8957	33.1184	31.7512
ACP5	0.0240167	0.0119876	0	0	0	0
ACP6	0.892742	0.966919	0.900208	0.758351	0.958037	0.819787
ACP7	0.616416	0.53978	0.462854	0.244283	0.268489	0.154888
ACR	0.0174163	0.086931	0	0	0	0.035635
ACRBP	0.235326	0.287123	0.338336	0.321	0.142816	0.347746
ACRV1	0.038593	0	0.0128045	0.0379032	0	0.0263213
ACSBG1	0	0.0107466	0	0.0026432	0	0.0027533
ACSBG2	0.00823046	0.0164324	0	0.00808334	0	0
ACSF2	10.7825	10.9326	10.1957	13.1749	13.5529	11.4202
ACSF3	2.5378	2.35763	2.46912	2.60621	2.47271	2.03529
ACSL1	7.98228	7.98973	8.66072	6.97144	7.51991	6.98944
ACSL3	7.64979	9.46879	7.6898	8.14462	8.51936	12.4586
ACSL4	10.2999	12.415	10.6103	11.8245	11.7411	17.9444
ACSL5	0.0462189	0.0461389	0.03286	0.00648467	0.124584	0.0607931
ACSL6	0.080387	0.1532	0.0909243	0.0322978	0.0580591	0.138311
ACSM1	0	0.00470075	0	0	0	0
ACSM3	0.113781	0.0631022	0.10696	0.0682898	0.0251098	0.0388006
ACSM4	0	0	0	0	0	0.0216935
ACSS1	7.43593	7.58552	8.18636	7.89316	7.66424	5.85909
ACSS2	25.7222	25.1776	23.7771	24.2483	22.1466	20.2681
ACSS3	0.00291768	0	0	0.00286553	0	0.00298489
ACTA1	0.167038	0	0	0.0656209	0.049765	0.0683543
ACTA2	4.13253	4.41415	4.12703	4.50511	5.32147	4.90415
ACTA2-AS1	0	0	0	0.0478907	0.0484252	0.0374142
ACTB	4407.85	4078.69	4191.89	3757.03	3880.65	3316.95
ACTBL2	0.27633	0.373735	0.212939	0.323918	0.168193	0.264457
ACTC1	0.0180212	0.0719602	0	0	0	0.0737455
ACTG1	2524.86	2333.59	2403.05	2010.15	2096.98	1596.29
ACTL10	0.534922	0.266998	0.328858	0.618071	0.546849	0.627722
ACTL6A	43.8528	55.5675	54.7665	41.1142	41.079	45.7471
ACTN1	135.346	129.079	135.864	128.919	125.39	106.303
ACTN1-DT	0	0.207531	0	0.16334	0.0412908	0.085072
ACTN2	0.122832	0.0196191	0.11248	0.0530799	0.0243965	0.0402116
ACTN3	0.410779	0.235409	0.280151	0.373552	0.309732	0.186774
ACTN4	144.133	142.245	139.954	129.332	134.147	107.357
ACTR10	16.9693	18.2705	18.6764	16.9882	16.0272	20.077
ACTR1A	74.3377	67.9802	71.9073	70.3036	71.9885	60.4115
ACTR1B	23.9741	24.1106	23.1429	25.5402	27.1436	20.9285
ACTR2	98.8345	108.24	98.8777	90.7178	91.6652	123.109
ACTR3	57.5582	64.5978	62.5123	51.9697	50.8912	65.2407
ACTR3-AS1	0.211062	0.0842788	0	0.331663	0	0.388664
ACTR3B	1.20821	1.12842	1.07348	1.33949	1.28083	1.38391
ACTR3C	0.0700466	0.0784298	0.0659523	0.195228	0.155105	0.16753
ACTR5	9.43607	8.54121	9.13916	7.097	8.93386	7.41263
ACTR6	8.10105	8.33036	7.62098	5.33702	6.46452	8.34633
ACTR8	3.31104	3.71454	3.2831	3.91049	3.64098	3.83465
ACTRT3	2.23567	2.8567	2.34396	3.6156	3.59675	3.1258
ACVR1	6.29495	6.34235	6.318	4.98953	5.25399	5.80074
ACVR1B	7.43122	7.11136	7.46977	5.99558	6.63685	6.75247
ACVR1C	0.011003	0.002746	0	0.00270159	0	0.0337695
ACVR2A	0.571478	0.593492	0.58717	0.859999	0.508028	0.975974
ACVR2B	0.762255	0.818623	0.784732	0.897274	1.00567	1.27529
ACVR2B-AS1	0.36611	0.296332	0.482594	0.398437	0.412711	0.728841
ACVRL1	0	0.0282461	0	0	0.0112398	0
ACY1	0.385315	0.297228	0.191762	0.27522	0.191326	0.232931
ACY3	0.0651546	0.130084	0.0648518	0.0159975	0.0161761	0.0333277
ACYP1	9.66131	10.9729	10.7681	9.60225	6.89427	9.61753
ACYP2	0.967995	0.949941	0.710374	1.23268	1.50713	1.58615
ADA	15.6491	15.8713	15.7421	10.0555	10.6637	8.26026
ADA2	0	0.0158459	0	0	0	0
ADAD1	0.01089	0	0	0	0	0
ADAL	1.44793	1.65548	1.30157	1.62871	1.43792	1.27113
ADAM10	12.1186	14.8866	12.5195	15.9865	16.5994	25.3486
ADAM11	1.36388	1.34207	1.51753	1.80832	1.61566	1.52486
ADAM15	50.3801	44.855	46.8069	34.0266	33.9021	26.3213
ADAM17	6.78423	8.18435	7.39899	6.90485	6.98933	8.05908
ADAM19	4.07863	4.34735	4.28882	4.89882	5.75368	5.44045
ADAM20	0.00926539	0.00369974	0.0110668	0.00909977	0.00184027	0.0189576
ADAM21	0.0470445	0.00939262	0.0187303	0.0462036	0.00934386	0.0577538
ADAM22	1.1869	1.49869	1.21534	1.70664	1.73779	2.08689
ADAM23	0.0348869	0.0193481	0.0115749	0.0304562	0.0423448	0.0118968
ADAM28	0.0220234	0.0188446	0.0344474	0.0339896	0.0843603	0.125528
ADAM29	0	0	0	0	0	0.00669796
ADAM32	0	0.144006	0.0168924	0.0166679	0.00842698	0.173622
ADAM33	0.0237874	0.0118731	0.0828687	0.0175216	0	0
ADAM8	13.8159	14.8478	14.2225	7.20062	7.71811	5.84721
ADAM9	29.3621	37.6646	32.6871	30.0616	31.2685	43.3554
ADAMTS1	0.850521	0.887424	0.88483	1.05713	0.835097	0.983178
ADAMTS10	0.821722	0.924902	1.27351	0.87203	1.07345	0.806799
ADAMTS12	0.0261914	0.0052292	0.0130348	0.00257232	0	0.0160768
ADAMTS13	0.562904	0.420406	0.498033	0.552842	0.699801	0.703841
ADAMTS15	0.769447	0.963129	0.809521	1.06893	1.00168	0.522062
ADAMTS16	0.170071	0.299605	0.288772	0.275109	0.183798	0.271217
ADAMTS17	0.0110986	0.0254827	0.0209894	0.0185304	0.0242482	0.00681258
ADAMTS18	0	0.017026	0	0	0	0
ADAMTS19	0.00825866	0	0.0109604	0	0.0109354	0
ADAMTS19-AS1	0	0.126525	0	0	0	0
ADAMTS2	0.0545199	0	0.00339165	0	0	0
ADAMTS3	0.0212866	0	0.00706256	0.0278748	0.00704649	0
ADAMTS4	0	0	0.005071	0	0.00252973	0
ADAMTS5	0.0324354	0.0996283	0.0720195	0.267097	0.282467	0.339483
ADAMTS6	0.0620565	0.0929237	0.0531892	0.0440175	0.0804582	0.10581
ADAMTS7	1.31721	1.61226	1.4447	4.80799	5.06162	3.71221
ADAMTS9	3.0511	3.22844	2.88735	3.90452	4.10057	3.49568
ADAMTS9-AS1	0	0.0126525	0	0	0	0
ADAMTS9-AS2	0.257102	0.267816	0.267033	0.208592	0.499548	0.628971
ADAMTSL1	0	0	0	0	0	0.00112401
ADAMTSL3	0.0200425	0.0350137	0.00748102	0.00984214	0.002488	0.00768908
ADAMTSL4	3.33292	3.0438	3.42224	1.41186	1.66403	1.40509
ADAMTSL4-AS1	0.0721198	0.335976	0.287138	0.141661	0.143242	0.172156
ADAMTSL4-AS2	0.415089	0.828742	0.20658	1.54332	1.05999	0.727973
ADAMTSL5	11.2445	11.0049	10.1651	9.571	10.65	9.3742
ADAP1	1.17614	0.985886	1.12599	0.599601	0.606293	0.440878
ADAP2	5.26004	5.59485	6.48176	5.4631	5.83283	4.66772
ADAR	55.2359	54.3108	52.7517	58.8189	57.0243	55.1546
ADARB1	1.50408	1.57547	1.58624	1.57729	1.52742	1.51661
ADARB2	0.0205708	0	0.00585005	0.0432923	0.0204286	0.0120255
ADAT1	8.9629	8.26784	8.61592	8.92237	7.68244	8.64491
ADAT2	0.667817	0.825272	0.593052	0.690015	0.732233	0.990514
ADAT3	1.04356	0.995112	0.961198	2.53933	3.04718	2.64511
ADCK1	0.96625	1.00251	0.923936	1.46612	1.28302	0.938527
ADCK2	17.3902	16.4992	15.9038	15.2923	15.6888	12.2257
ADCK5	5.63834	6.46483	5.26739	5.16575	5.99932	4.74642
ADCY10	0	0	0.0114014	0.00562497	0	0.0117185
ADCY3	9.37191	9.31937	9.53202	9.54827	10.5399	9.45754
ADCY4	0	0	0.00668183	0	0	0
ADCY5	0.417344	0.293072	0.232053	0.299639	0.234384	0.185506
ADCY6	6.32447	5.97497	5.93875	7.76582	7.99595	6.95847
ADCY6-DT	0	0.359022	0	0.132456	0.267869	0.0459911
ADCY7	4.0473	4.40163	4.6435	3.78465	3.15882	3.35881
ADCY8	0	0.00472218	0.037667	0	0.028186	0
ADCY9	2.90009	2.4019	2.84715	2.15341	2.57417	2.3055
ADD1	46.1842	44.5265	45.6076	47.449	45.7735	42.1444
ADD3	3.21457	3.68713	3.49167	3.95804	3.32947	5.99014
ADD3-AS1	0	0.0194236	0	0	0	0.079622
ADGRA2	1.36015	1.04582	1.44574	0.44993	0.722987	0.508636
ADGRA3	6.64435	6.19037	6.02813	7.17211	6.7161	7.38556
ADGRB1	2.08834	1.86081	1.7014	1.48128	1.60151	1.60629
ADGRB2	5.18426	5.35058	4.97706	3.4861	3.81149	3.43456
ADGRB3	0.130866	0.110227	0.146539	0.160658	0.101532	0.129696
ADGRB3-DT	0.0932785	0.465585	0.0464225	0.0458056	0	0
ADGRD1	0	0	0.0100935	0.00248984	0	0
ADGRE1	2.21648	1.86626	2.38944	3.16445	2.84112	2.75293
ADGRE2	0.709906	0.782626	0.648235	0.503208	0.530282	0.454701
ADGRE5	18.4508	18.7962	18.4005	16.1807	16.5313	16.738
ADGRF1	0.0451928	0.131243	0.155395	0.41964	0.444724	0.596837
ADGRF3	0.0105935	0.00705012	0	0.00693611	0.0455879	0.0144501
ADGRF4	0.135355	0.0635863	0	0.0234592	0.00790703	0.0407274
ADGRF5	0.02389	0.0158991	0.047558	0.117315	0.118624	0.171082
ADGRG1	16.7134	15.3566	15.5528	11.3799	11.8461	11.0008
ADGRG3	0.00352867	0.0140903	0	0.0034656	0	0
ADGRG5	0	0.00509368	0.0406304	0	0	0
ADGRG6	18.5136	20.9809	16.6883	28.2698	27.0984	40.8813
ADGRG7	0.00628606	0	0	0	0	0
ADGRL1	2.73075	2.92634	2.94384	3.25031	3.22306	3.07331
ADGRL1-AS1	0.163851	0.241047	0.25751	0.245618	0.282616	0.255849
ADGRL2	1.75839	1.87315	1.54113	1.90081	1.7978	2.33252
ADGRL3	0	0.00521631	0.0078016	0	0	0
ADGRV1	0.221263	0.206996	0.231561	0.265736	0.292559	0.252229
ADH1C	0	0	0	0	0	0.0700937
ADH5	53.3981	55.3119	59.2165	49.7597	47.7317	50.3721
ADHFE1	0.328367	0.718635	0.263987	0.781436	0.68982	1.02071
ADI1	5.11627	4.67047	5.2958	7.0978	7.34123	6.47798
ADIPOR1	50.9802	50.5874	53.3346	44.3759	45.558	41.3033
ADIPOR2	30.752	31.9014	30.7057	40.3464	38.5173	38.2478
ADIRF-AS1	3.27358	3.78956	3.26602	2.63394	2.72439	2.27197
ADK	9.64612	10.7	10.8561	10.202	9.42649	9.79829
ADM	12.3024	13.0643	14.2391	11.3284	11.7698	11.6637
ADM-DT	0.107995	0.0248788	0.0413436	0.130541	0.0247497	0.0679895
ADM2	2.74854	2.43054	2.41187	0.810393	0.732878	0.677698
ADM5	1.58029	1.67221	2.10774	0.962266	1.25549	1.68136
ADNP	21.2415	21.5391	19.8636	22.9562	23.7127	25.9769
ADNP-AS1	0.314035	0.8199	0.384708	1.04389	1.07953	1.11208
ADNP2	13.1774	12.9635	13.2976	10.4484	9.12104	10.3287
ADO	8.45193	9.41592	7.87201	8.44396	8.75529	8.11128
ADORA1	8.13585	8.04413	7.91997	12.1461	11.9186	11.0208
ADORA2A	0.0357322	0.00891759	0.106698	0.105281	0.088713	0.00913883
ADORA2A-AS1	0	0	0	0.0121571	0.00614642	0
ADORA2B	8.49212	8.23313	8.91844	9.67275	9.29467	8.53401
ADPGK	8.12857	9.2472	9.59031	9.004	9.31756	9.32541
ADPGK-AS1	0.00912284	0	0	0	0	0
ADPRH	1.00843	0.903141	0.757109	1.2847	0.864117	1.01987
ADPRHL1	0.353105	0.312864	0.403455	0.28318	0.261441	0.143213
ADPRM	3.06852	4.79741	4.10467	3.65149	2.88608	3.02294
ADPRS	23.1629	24.9672	20.8125	27.2337	24.4498	20.8842
ADRA2B	0	0.0067268	0	0.0264721	0	0.00689368
ADRA2C	1.6278	1.85712	1.79383	1.38174	1.24705	0.749384
ADRB1	0.336005	0.171802	0.350758	0.289755	0.252297	0.117376
ADRB2	2.59817	2.56898	3.20184	1.82267	1.48669	1.79733
ADRM1	78.6516	73.4544	77.5203	70.2128	72.2307	57.3354
ADSL	20.0392	19.8748	19.8217	18.0667	18.4767	15.3845
ADSS1	1.71913	1.45213	1.14076	1.41782	1.29138	0.958283
ADSS2	8.36599	10.6269	10.2443	8.80919	9.46225	11.7904
ADTRP	0.288208	0.396477	0.356836	0.324479	0.167541	0.204954
AEBP2	4.9557	5.00023	4.61088	5.48606	4.92957	7.09612
AEN	7.70637	8.10061	7.70611	6.55613	6.14782	5.29943
AFAP1	25.5168	24.6159	24.735	26.5742	25.8197	24.2897
AFAP1-AS1	0.043983	0.0512247	0.0364821	0.0863936	0.0946377	0.0374968
AFAP1L1	10.8587	10.7666	11.5967	9.34382	9.47498	7.97777
AFAP1L2	9.1846	8.69675	9.16018	10.8101	10.99	10.711
AFDN	13.2507	13.7956	12.7846	11.5594	11.2894	12.3111
AFDN-DT	0.377191	0.494878	0.439798	0.0846739	0.310369	0.143327
AFF1	4.68281	4.31668	4.3018	7.33003	7.01736	8.82664
AFF1-AS1	1.49816	1.57227	1.24904	1.86124	1.42423	1.76847
AFF3	0.00611294	0.00488189	0.00243381	0	0.00121414	0
AFF4	11.7218	12.2456	10.4648	14.4008	15.2026	20.096
AFG1L	0.285521	0.293493	0.438953	0.347051	0.258281	0.474298
AFG3L2	21.5867	22.5616	22.7633	22.2722	20.9721	20.3392
AFMID	12.3227	12.3338	13.257	14.4953	14.9475	12.3296
AFTPH	5.38992	6.85773	6.53603	6.1165	5.62413	7.38656
AFTPH-DT	0.0253232	0.0126397	0.0126027	0.161659	0.0502963	0.0259065
AGA	6.40668	7.14012	6.17002	3.71045	4.77179	5.51608
AGA-DT	0.0576513	0.0143879	0.100421	0.0141552	0.128819	0.0737241
AGAP1	3.72061	3.58769	3.41313	3.65411	3.45272	3.5429
AGAP1-IT1	0.337573	0.262102	0.0373337	0	0.148995	0
AGAP11	0.100136	0.207066	0.0925516	0.203718	0.184682	0.0512215
AGAP2	2.58242	2.17145	2.24825	1.82187	2.06686	1.41709
AGAP2-AS1	15.4703	13.982	16.3699	16.5198	17.6412	13.7131
AGAP3	11.3137	11.1371	11.2731	13.9863	13.4457	10.7617
AGAP4	2.50681	2.57397	2.3137	2.25737	2.40542	2.85099
AGAP5	1.68539	1.44474	1.32199	2.0241	1.34627	2.32394
AGAP6	0.296934	0.351999	0.0923606	0.4101	0.285667	0.427182
AGAP9	4.85169	3.69757	4.09179	4.4678	4.11356	5.8921
AGBL2	0.458142	0.355175	0.538482	0.579194	0.551778	0.737945
AGBL3	0.156003	0.183215	0.185724	0.147206	0.212641	0.28164
AGBL5	10.2176	9.59668	9.81468	10.6689	9.94238	9.53972
AGBL5-AS1	0	0	0	0.120197	0.0607695	0.125204
AGER	1.54746	1.44277	1.54027	1.41944	1.10183	1.38895
AGFG1	6.93729	7.36859	6.78321	7.38083	7.37558	9.79381
AGFG2	2.11333	1.85381	1.75693	2.16104	2.03148	2.03338
AGGF1	5.54685	6.81082	6.42652	7.51238	7.13902	10.7307
AGK	4.49547	4.71099	4.88313	3.97361	3.66426	4.31464
AGK-DT	0	0.00511359	0	0.00503089	0	0
AGL	3.09369	3.11426	2.67865	4.96728	5.06463	8.28933
AGMAT	0.329926	0.698874	0.36043	0.395156	0.287688	0.370455
AGMO	0.00946492	0.0157476	0.0251225	0.00309858	0	0.00322765
AGO1	4.01504	4.32611	3.6226	3.7947	4.12691	4.26593
AGO2	5.5091	5.14833	4.8805	6.76945	7.03679	7.99866
AGO3	0.646812	0.6901	0.633178	0.83098	0.852625	1.11772
AGO4	3.53848	3.55046	3.32353	4.26169	3.98516	4.62469
AGPAT1	30.0153	30.7852	29.4739	25.3602	27.5713	24.9865
AGPAT2	54.5791	49.7245	49.0661	50.3443	49.0024	38.8943
AGPAT3	12.5728	12.3087	12.9951	13.0977	13.4974	13.4717
AGPAT4	2.83553	2.50555	2.48905	3.31285	3.2461	3.5357
AGPAT4-IT1	0.306486	0.159629	0.18569	0.34027	0.224968	0.272649
AGPAT5	3.92029	4.98467	4.22529	3.88257	4.22035	5.18055
AGPS	6.26779	7.35584	6.63906	5.76334	6.00852	8.50878
AGRN	146.263	143.156	147.307	166.297	168.887	123.295
AGTPBP1	1.94943	2.40504	1.87122	2.05507	2.13889	3.56849
AGTRAP	42.3197	37.779	39.0049	33.6901	35.6119	28.9426
AGXT	0	0	0	0.00843454	0	0
AHCTF1	3.52396	4.29233	3.39066	5.27462	5.1653	9.21125
AHCY	121.78	110.555	117.123	113.438	114.84	99.5984
AHCYL1	40.7319	41.6623	38.876	40.9787	42.7355	45.4038
AHCYL2	4.2466	4.20362	3.80708	5.46108	5.02267	5.25379
AHDC1	4.75605	4.6921	4.79534	3.8228	4.14554	3.57332
AHI1	0.65168	1.06783	0.760035	1.54836	1.64409	2.79472
AHI1-DT	0	0.116031	0	0.031133	0.041974	0.0864796
AHNAK	116.47	109.701	101.881	110.818	112.026	113.639
AHNAK2	46.3299	47.9015	46.6187	38.8621	37.815	32.8312
AHR	3.76991	3.53241	3.53797	3.57323	3.19713	4.42812
AHSA1	76.053	82.2183	86.1579	77.8248	78.5062	63.6363
AICDA	0.00854679	0	0.00850707	0	0.0424386	0
AIDA	28.12	29.5004	27.7477	23.3584	26.928	29.5471
AIF1	0	0.0250628	0.0249895	0.0246574	0	0
AIF1L	5.66935	5.21471	5.8477	3.5953	3.87371	2.98763
AIFM1	21.4351	21.77	22.8114	23.8426	24.4788	22.3974
AIFM2	17.5616	17.3251	16.7608	17.3022	16.2418	13.3609
AIFM3	0.396316	0.520566	0.415236	0.829679	0.61108	0.341428
AIG1	3.54519	3.61808	3.76757	2.86709	2.71974	3.19659
AIMP1	4.48616	4.8691	5.59211	4.29024	4.33813	6.32886
AIMP2	17.1461	18.285	18.975	17.2666	17.7804	16.2637
AIP	33.1739	32.0918	33.9704	42.7458	43.1238	27.5646
AIPL1	0.00666632	0.0532382	0.0862593	0	0.0264809	0.0136398
AIRE	0	0	0.00921546	0	0	0.00947177
AJM1	2.66115	3.16536	3.19349	2.62412	3.13827	1.98146
AJUBA	13.6958	13.6353	13.8157	11.9818	11.7022	11.2737
AJUBA-DT	0.46121	0.395793	0.547658	0.508594	0.42588	0.745002
AK1	11.1109	11.4183	12.3215	14.9863	14.9585	11.8607
AK2	47.3137	49.1206	50.2056	39.3301	38.5312	40.4616
AK3	10.5579	12.7918	12.0242	11.5123	10.7698	13.5042
AK4	15.8519	15.4443	14.529	19.7054	20.1292	24.1375
AK5	0.0934805	0.168691	0.178935	0.0600293	0.117828	0.0956338
AK6	5.44197	4.83664	4.25596	4.82659	4.85289	6.71772
AK7	1.80968	1.64294	1.76729	1.32127	1.43096	1.74658
AK8	0.281183	0.37151	0.362192	0.150262	0.275133	0.14806
AK9	0.306885	0.26667	0.272222	0.284221	0.306342	0.447343
AKAP1	12.0761	11.9819	11.7327	11.279	10.7006	11.6537
AKAP10	6.16657	6.03352	6.41857	6.89316	6.81183	7.61926
AKAP11	1.37181	1.6438	1.30597	1.83082	1.7753	3.75059
AKAP12	45.2388	48.6819	40.1328	39.5417	39.3823	52.1703
AKAP13	3.90066	3.82271	3.36559	4.41465	4.98877	4.56299
AKAP17A	0.264702	0.0621751	0.178231	0.0458772	0.270604	0.0955763
AKAP3	0.239044	0.268459	0.275109	0.242107	0.207717	0.114633
AKAP4	0	0	0.00823848	0	0	0
AKAP5	0.214999	0.180133	0.0878928	0.505266	0.522344	0.608795
AKAP6	0.0258261	0.0504419	0.0156472	0.0176449	0.020072	0.0321647
AKAP7	0.771117	0.778432	0.836525	0.416959	0.606606	0.655923
AKAP8	7.98466	8.45249	9.07712	9.23013	9.11045	8.18945
AKAP8L	17.7382	19.6098	21.3181	23.648	24.1738	19.1277
AKAP9	0.905445	1.84697	1.55482	2.07984	1.87826	4.34061
AKIP1	8.92054	8.55249	10.2106	7.60229	7.10501	6.33517
AKIRIN1	30.0754	32.641	30.7288	32.9685	30.8245	32.427
AKIRIN2	22.2022	20.998	21.9423	17.4237	17.3315	16.1895
AKNA	4.24849	3.90668	4.09984	5.03803	5.11384	4.51054
AKNAD1	0.146982	0.211941	0.284471	0.0962368	0.243277	0.392628
AKR1A1	49.2597	45.7641	44.2045	46.4156	48.5283	39.4909
AKR1B1	193.844	186.326	188.536	818.179	832.583	752.32
AKR1B15	0	0.00732751	0	0.00720901	0	0
AKR1C1	0.045677	0.0797963	0.0454646	0.0261686	0.0453612	0.00778819
AKR1C2	0.0422841	0.0361808	0.0841752	0	0.0479907	0.0247189
AKR1C3	0.529901	0.787025	0.771861	0.533123	0.320877	0.55533
AKR1C8	0	0	0	0	0	0.0817291
AKR1D1	0.0649544	0.0926313	0.0184721	0.02734	0.00921505	0.0189859
AKR7A2	25.4664	23.8085	24.146	27.4768	26.3292	20.0019
AKR7A3	0.344672	0.266381	0.199202	0.262073	0.364373	0.375361
AKT1S1	29.5803	27.8771	30.0934	35.3982	35.8755	31.8869
AKTIP	7.06385	8.30994	7.78043	4.49489	6.1917	6.04954
ALAD	14.9846	16.0524	15.7794	16.1799	17.4088	17.1273
ALAS1	31.5387	31.9484	30.7681	29.1079	28.0771	27.0825
ALCAM	13.418	16.5278	13.424	14.6341	12.9562	18.8262
ALDH16A1	5.96658	5.20976	5.86833	7.43701	6.98064	4.96858
ALDH18A1	43.1012	42.6191	41.3295	44.8771	42.9587	42.848
ALDH1A2	0	0	0	0	0	0.00726313
ALDH1A3	67.6013	69.7634	70.7029	68.2967	70.4493	65.5081
ALDH1A3-AS1	0.305877	0.195171	0.34212	0.309701	0.247395	0.222595
ALDH1B1	20.7811	20.6574	20.0003	15.2915	15.8115	14.7265
ALDH1L1	0.833315	0.610487	0.608703	0.237606	0.160172	0.220003
ALDH1L1-AS2	0	0	0.0213336	0	0	0.0109634
ALDH1L2	2.72478	2.66251	2.28929	0.774811	0.717166	0.980919
ALDH2	2.01098	1.91128	1.7968	1.43266	1.30896	1.31379
ALDH3A1	0	0	0	0	0	0.00641144
ALDH3A2	25.6463	29.0681	28.142	25.2059	23.7237	26.6443
ALDH3B1	0.783293	0.823977	0.754502	0.215071	0.326207	0.275729
ALDH3B2	0.00900411	0	0	0	0	0.0368461
ALDH4A1	15.897	14.141	14.3523	15.6349	17.1139	12.1172
ALDH5A1	4.80765	4.20783	4.61748	3.44903	3.74586	3.96724
ALDH6A1	4.53831	4.1857	4.26161	4.06582	3.90455	3.89093
ALDH7A1	22.914	24.2674	23.5826	22.3093	19.6101	20.8271
ALDH8A1	0	0.0490573	0.0978279	0.00965279	0.0683237	0.0603293
ALDH9A1	33.5428	35.0515	36.3247	33.9127	33.4776	32.427
ALDOA	17.487	19.3976	17.3481	11.639	12.6194	12.2304
ALDOC	0.372792	0.4294	0.813475	0.633683	0.327498	0.308037
ALG1	5.22229	4.52096	4.53175	5.30661	5.10833	5.07113
ALG10	0.862767	0.985707	0.873353	0.717723	0.667481	1.40522
ALG10B	0.79049	0.945966	0.869896	0.802882	0.870355	1.48931
ALG11	0.566205	0.759998	0.628308	0.665046	0.66867	0.849302
ALG12	6.00413	5.46135	5.29942	6.2198	6.98214	5.5241
ALG13	2.12624	2.24344	2.00605	2.23941	2.21753	3.18514
ALG14	0.448002	0.549577	0.552408	0.475019	0.480321	0.567772
ALG2	11.5923	11.7405	13.207	11.9078	11.6091	12.5762
ALG3	20.8441	19.2374	19.3685	18.7678	18.7369	17.5822
ALG5	11.4533	17.24	14.5037	12.3871	11.6917	13.8642
ALG6	3.77513	4.51633	4.24964	2.93522	3.03493	3.80079
ALG8	7.02942	8.33361	7.18425	7.48801	7.5519	10.2241
ALG9	4.19817	4.21214	4.21042	3.38835	2.99305	3.52223
ALKBH1	4.10454	3.75279	3.96137	3.95582	3.39998	4.76813
ALKBH2	7.94219	7.13003	7.96081	6.46669	5.63377	5.11865
ALKBH3	18.3242	21.7223	23.3285	18.5986	17.6689	15.1983
ALKBH4	8.00276	7.25836	8.45901	7.54672	8.24049	6.84674
ALKBH5	37.5197	38.3126	37.7062	42.1065	41.9971	40.2067
ALKBH6	8.95764	9.13597	9.251	8.33985	9.02427	6.55516
ALKBH7	20.7453	16.9041	20.1746	20.0145	19.8921	13.2176
ALKBH8	1.50974	1.91289	1.26628	1.70568	2.20177	2.7974
ALMS1	1.47602	1.81201	1.14886	1.81109	1.7873	3.00623
ALMS1-IT1	1.33976	1.22481	0.968563	0.69253	0.588219	1.11092
ALOX12	0	0.0213869	0.0373177	0	0	0
ALOX12-AS1	3.55791	3.13165	3.1225	2.55498	3.34335	2.62227
ALOX12B	0.287179	0.168055	0.354841	0.252869	0.3442	0.354579
ALOX15	0	0.00921848	0.0551493	0	0	0.00944718
ALOX5AP	12.8328	13.9214	13.4377	4.86289	5.70908	5.78638
ALOXE3	0.187763	0.147272	0.300359	0.0461016	0	0.0137205
ALPK1	2.01125	1.96172	1.86416	1.31838	1.29186	1.55262
ALPK2	0.576001	0.681982	0.513325	0.493348	0.568694	0.548158
ALPK3	0.287051	0.233129	0.196128	0.98911	0.985656	0.686874
ALPL	0	0	0	0	0	0.00901913
ALPP	0.00904334	0	0	0	0.00898083	0
ALS2	3.88069	3.90061	3.89807	3.76109	3.51596	4.33638
ALS2CL	4.46792	4.05293	4.44716	2.94468	3.02636	2.33319
ALX3	0	0	0	0	0.050605	0
ALYREF	63.4099	62.4616	65.4427	68.2298	66.128	41.3193
AMACR	0.291007	0.16946	0.102586	0.190537	0.174601	0.272901
AMBP	0	0	0.0196431	0	0	0.0201894
AMBRA1	12.4508	11.104	11.9788	12.6108	13.161	11.395
AMD1	13.8348	15.9108	15.1261	16.8387	17.6025	24.5479
AMDHD1	0.380405	0.134028	0.322955	0.263722	0.0555552	0.160246
AMDHD2	4.69066	4.49281	4.27537	4.71135	5.26222	3.96652
AMER1	1.67675	1.55851	1.61293	1.68751	1.57984	1.26077
AMFR	32.4729	31.8973	31.384	33.3176	29.9864	30.6837
AMH	2.97377	3.21601	3.24772	2.04173	2.2696	1.98593
AMIGO1	2.35258	1.74447	2.63555	2.41036	2.4613	1.96602
AMIGO2	0.691117	0.846721	0.800471	1.14156	0.923439	0.983425
AMIGO3	2.58995	2.41136	2.63867	3.00613	2.87515	2.41766
AMMECR1	1.68879	1.62626	1.83375	2.08163	1.82111	2.5959
AMMECR1L	7.38423	6.58151	6.80118	7.41061	8.37972	7.84974
AMN	0.0511824	0.0102188	0.0305667	0.0150803	0.03558	0.0575975
AMN1	2.57025	2.919	2.4571	3.16337	3.15829	3.96914
AMOT	3.78019	3.93732	3.71336	2.3971	2.54367	2.82608
AMOTL1	1.50327	1.18721	1.27726	0.85233	1.09265	0.774009
AMOTL2	19.3325	20.0172	19.3763	17.6351	17.5557	15.8036
AMPD1	0	0.0106476	0	0	0	0
AMPD2	15.0362	14.8516	13.3789	18.3509	20.3558	15.6836
AMPD3	0.201644	0.196614	0.256718	0.142773	0.167651	0.0863534
AMT	1.06007	0.946185	0.819286	0.649168	0.755496	0.484829
AMY2B	0.14656	0.146306	0.320932	0.326264	0.320202	0.499785
AMZ1	0.0153623	0.00460071	0	0.00603508	0.00457683	0
AMZ2	25.3766	26.636	24.7896	18.4825	17.5872	18.6197
ANAPC1	5.42313	5.28067	5.09273	5.27906	5.58423	6.33908
ANAPC10	1.6355	1.4526	1.43638	1.28738	1.37937	1.544
ANAPC11	37.5557	37.6328	35.3665	28.0321	29.036	20.7068
ANAPC13	15.603	17.7626	16.7417	13.5182	13.9645	16.2529
ANAPC15	6.15371	6.05737	5.8688	5.30446	5.98659	5.18092
ANAPC16	21.2217	20.865	22.8545	23.3748	21.346	24.7393
ANAPC2	11.7632	12.7823	12.026	14.8235	15.8926	11.871
ANAPC4	4.08164	4.55442	3.66532	3.14454	3.57608	5.64256
ANAPC5	25.4256	27.2919	26.6666	27.1516	26.4676	24.9754
ANAPC7	7.87975	8.21803	6.99802	8.55814	9.19605	8.23904
ANG	4.32468	4.31719	4.64486	3.02185	3.19138	3.16521
ANGEL1	4.70577	4.29588	4.3334	4.83275	5.58609	4.53346
ANGEL2	3.8226	4.01215	3.69772	3.40963	3.64748	4.4994
ANGPTL4	80.7545	71.1277	78.363	68.4384	68.0511	49.9546
ANGPTL6	0.32125	0.0928326	0.0841466	0.166057	0.16791	0.103784
ANK1	0.0260407	0.0519913	0.0933109	0.145779	0.206886	0.125211
ANK2	0.660639	0.684136	0.7385	0.764336	0.715191	0.695167
ANK3	0.0228022	0.0374915	0.0280365	0.0250293	0.0239766	0.0315607
ANKAR	0.258272	0.356988	0.454819	0.296582	0.288054	0.284546
ANKDD1A	2.2247	1.83601	2.09444	1.79054	1.57922	1.6022
ANKDD1B	0.0700573	0.04371	0	0.00860062	0.0173932	0
ANKEF1	3.68008	3.41033	3.50903	2.69397	2.54786	2.80619
ANKFY1	15.7344	15.9048	14.5081	16.5288	16.7395	17.1309
ANKH	6.38088	5.79724	5.22711	4.68479	4.09957	4.50292
ANKHD1	0.212614	0.218142	0.252775	0.246516	0.299121	0.314183
ANKHD1-EIF4EBP3	0.0119622	0.00895614	0.00297666	0.0058742	0.0237591	0.0214161
ANKIB1	10.846	12.9017	10.5063	14.4485	14.7073	20.5962
ANKK1	0	0	0	0	0	0.00382281
ANKLE1	0.0756746	0.159481	0.0334768	0.04129	0.125253	0.120428
ANKLE2	15.6101	15.2536	14.4215	18.3678	19.4308	18.2937
ANKMY1	1.24776	1.22205	1.14281	1.19199	1.09075	0.895696
ANKMY2	11.5928	12.8719	12.1681	11.3581	11.1526	14.6274
ANKRA2	4.55949	4.3	5.06282	3.25161	3.94775	4.28948
ANKRD1	0.973953	0.972267	1.2741	0.341623	0.497427	0.740174
ANKRD10	3.448	3.94588	3.49594	5.64394	5.75012	8.44532
ANKRD11	29.0457	30.8616	29.1861	22.7242	22.9683	21.9018
ANKRD12	0.244879	0.617148	0.53543	0.486917	0.530225	1.34089
ANKRD13A	9.06364	8.35843	9.18361	9.10569	9.99366	9.14029
ANKRD13B	2.98714	2.9552	3.05866	2.77573	2.60966	2.54571
ANKRD13C	2.86514	3.27477	2.84348	3.74504	3.18695	5.07264
ANKRD13D	9.34462	9.98164	11.4484	11.7883	11.2396	10.5326
ANKRD16	2.22531	2.33934	2.16977	1.81979	1.72284	1.25444
ANKRD17	5.33319	5.0706	4.50286	6.93907	6.72218	8.4446
ANKRD17-DT	0.0502462	0.0585191	0.0333418	0.049348	0.0332659	0.0171345
ANKRD18A	1.75473	2.44942	2.26027	2.13465	2.21998	3.06835
ANKRD18B	0.981333	1.10343	1.17535	1.08559	1.04951	1.81481
ANKRD2	0	0	0	0.178305	0.0655618	0.0844236
ANKRD20A1	0.0191826	0.00638312	0.0572802	0	0	0
ANKRD20A4-ANKRD20A20P	0.0170312	0.0793416	0.0508562	0.0223024	0.0676541	0.040655
ANKRD23	0.578298	0.490702	0.41252	0.501699	0.555157	0.522597
ANKRD24	0.226042	0.270781	0.188993	0.115441	0.022448	0.0924997
ANKRD26	0.0983829	0.210129	0.159414	0.266653	0.200707	0.550839
ANKRD27	13.054	13.1604	12.7024	10.7179	11.8476	11.0896
ANKRD28	5.77725	6.61322	5.1948	6.08514	6.42771	8.24124
ANKRD29	0.299324	0.302899	0.302013	0.205378	0.195455	0.17618
ANKRD31	0.0267964	0	0.00381027	0.00751927	0.0304128	0
ANKRD33B	4.41869	4.17456	4.3674	3.62907	3.286	3.40616
ANKRD34A	0.497141	0.503173	0.316141	0.508598	0.431991	0.402635
ANKRD34B	0.00612226	0.0122233	0	0.036077	0.0790392	0.0688962
ANKRD35	0.0222435	0.00740168	0.0221402	0.00728198	0.00736326	0.00758531
ANKRD36	0.41288	0.557187	0.433793	0.515636	0.359406	0.844782
ANKRD36B	0.165937	0.346133	0.214468	0.167835	0.260712	0.385125
ANKRD36C	0.273618	0.339914	0.287477	0.510582	0.37136	0.615827
ANKRD37	6.41392	4.92896	6.98638	4.94433	5.02355	4.72935
ANKRD39	8.48793	9.17005	9.9214	6.63606	7.01513	4.85587
ANKRD40	17.7664	18.2265	16.6704	16.6875	17.2989	17.3056
ANKRD42	2.02486	2.07423	1.92218	1.98866	1.98254	2.25073
ANKRD42-DT	0.443858	1.30465	1.07994	0.72654	0.514255	1.05953
ANKRD44	0.656664	0.607729	0.596875	0.559832	0.636275	0.905051
ANKRD44-IT1	0	0	0.0927581	0	0	0
ANKRD45	0.0423921	0.00705312	0	0.0242867	0.00350825	0
ANKRD46	1.11396	1.17541	1.32709	0.782272	0.641974	0.962476
ANKRD49	2.56269	2.76937	3.19466	3.51875	3.23681	4.46711
ANKRD50	2.17662	3.00953	2.64682	3.34001	3.09985	5.01474
ANKRD52	10.9254	10.5776	10.6686	13.1579	13.075	12.3023
ANKRD53	0	0	0	0	0.0149989	0.0154512
ANKRD54	5.71891	5.3968	5.45727	5.99907	6.23084	4.8516
ANKRD55	0	0	0	0	0.005768	0
ANKRD6	2.31201	2.85214	2.52072	2.61955	2.58189	2.87591
ANKRD60	0	0.0072974	0	0	0	0
ANKRD61	0.140016	0.157245	0.121945	0.0687566	0.17381	0.107431
ANKRD63	0.143287	0.132443	0.063387	0.093817	0.23189	0.1303
ANKRD65	0	0.0148876	0.00742203	0.00732341	0.0296206	0.00762846
ANKRD9	4.64257	4.04554	4.57401	5.14568	4.79463	4.26318
ANKS1A	3.51738	3.75377	3.19651	3.49275	3.35312	3.08245
ANKS1B	0.00661462	0.0158476	0.00921742	0.0103942	0.011824	0.0108272
ANKS3	3.94841	3.4581	3.82384	4.12776	4.78523	3.29195
ANKS6	4.37645	4.45392	3.8013	3.97789	4.0102	3.3816
ANKZF1	17.4179	18.3386	18.0392	21.2641	21.6065	21.6987
ANLN	21.0856	28.3824	22.3762	23.1103	22.9541	37.06
ANO1	0	0	0	0.0253124	0	0
ANO10	9.09036	8.07973	8.35171	7.92929	8.77759	8.02786
ANO3	0	0	0.00212203	0	0	0
ANO4	0	0	0	0	0.00291596	0.00600779
ANO6	24.0835	23.7039	22.9335	34.2381	33.0153	40.0698
ANO7	0.974028	1.30996	1.01887	2.16568	2.03311	2.25127
ANO8	4.55355	4.25785	3.92873	3.41271	3.38168	2.80219
ANO9	0.852923	1.12692	1.02374	1.0742	1.18584	0.995757
ANP32A	78.1048	89.2086	83.6141	68.0875	68.6549	80.447
ANP32A-IT1	0.0531355	0.0530435	0.0528885	0.111826	0.158305	0.100953
ANP32B	257.753	258.732	262.054	195.764	197.198	210.739
ANP32E	32.1294	40.4307	33.385	30.1006	28.6068	49.5142
ANPEP	0.00679546	0.0610533	0	0	0.013497	0.00695199
ANTKMT	7.72925	7.23006	7.83579	7.59109	7.53367	5.3301
ANTXR1	8.37659	8.68452	8.2291	10.2002	10.1828	10.9404
ANTXR2	1.11393	1.48016	1.26108	0.973282	0.946773	1.26279
ANXA1	94.4366	125.852	122.352	94.1467	88.605	115.438
ANXA11	26.5573	24.9227	27.319	26.7559	26.1714	22.1076
ANXA2	413.658	438.465	442.522	406.742	406.172	395.187
ANXA2R	1.81088	1.44162	1.69979	1.24946	1.44552	1.27806
ANXA3	59.9677	65.3329	61.6797	54.3692	56.0124	59.2495
ANXA4	17.0258	18.4629	19.2808	21.595	21.9643	22.0055
ANXA5	131.866	137.975	140.161	129.893	126.6	125.991
ANXA6	98.4585	93.6197	95.3189	96.0792	96.3057	74.7363
ANXA7	36.1092	37.1401	34.8817	31.3921	32.0119	30.888
ANXA8	4.69806	4.33834	5.31474	3.84198	3.74121	3.57093
ANXA8L1	2.25405	2.05341	1.49571	1.11293	1.6024	0.882064
ANXA9	0.0877832	0.0751125	0.0624109	0.0246326	0.0996302	0.0641467
AOAH	0	0	0.00202248	0	0	0.00207874
AOC1	0	0.00800717	0	0	0	0
AOC2	0.502387	0.575816	0.713037	0.511681	0.54511	0.599619
AOC3	0.0786278	0.0932089	0.0733709	0.00965279	0.0634435	0.0754116
AOPEP	0.233767	0.304157	0.206536	0.260544	0.276494	0.225716
AOX1	2.41982	2.70858	2.54743	2.40964	2.44131	2.60352
AP1AR	2.67145	2.92828	2.45449	2.69098	2.697	3.71406
AP1B1	42.7846	40.7705	39.6157	42.8655	42.2216	34.0496
AP1G1	17.5592	18.2471	17.0051	19.5134	19.9968	23.8257
AP1G2	5.59293	5.46033	5.71306	6.22783	5.96343	5.7363
AP1G2-AS1	2.1023	2.27483	2.1689	3.17244	3.49739	4.37995
AP1M1	8.0404	7.29961	7.32442	6.82305	6.99511	6.26158
AP1M2	3.47952	3.58554	3.6123	6.68766	6.67561	5.3714
AP1S1	122.191	117.335	124.433	114.779	110.069	101.521
AP1S2	4.8484	5.3689	5.08289	5.88986	5.61957	8.5082
AP1S3	4.76738	4.87764	5.31739	5.55969	5.06329	6.26429
AP2A1	42.104	39.3782	43.6909	35.8534	37.3149	32.3349
AP2A2	27.4782	25.877	27.486	30.8621	31.9767	28.6043
AP2B1	129.286	121.803	112.995	127.628	121.952	124.319
AP2M1	219.555	201.687	199.997	224.495	229.281	182.951
AP2S1	122.992	119.938	124.125	115.836	119.89	98.8906
AP3B1	10.5113	12.0533	10.6424	10.0194	9.75085	11.6846
AP3B2	0	0.0103737	0.0206867	0.0204118	0.00687989	0.00354368
AP3D1	47.6531	45.9014	45.3719	46.0838	47.8789	41.6524
AP3M1	13.1097	11.4011	11.7189	10.4631	11.0879	14.2372
AP3M2	2.98666	2.8003	3.30674	2.4633	2.42525	2.21141
AP3S1	10.5519	11.7104	11.937	8.69988	9.07529	10.9414
AP3S2	0.035945	0	0	0.0044128	0.00446206	0.0275797
AP4B1	5.83857	5.04412	5.68334	4.26407	4.41928	4.56641
AP4B1-AS1	0	0	0.0115408	0.0113874	0	0
AP4E1	1.74852	2.04597	1.58217	2.49119	2.42495	3.69868
AP4M1	9.74121	9.65543	10.052	12.563	13.152	12.6047
AP4S1	0.949512	1.08127	0.969601	1.17086	1.25726	1.28439
AP5B1	5.58765	4.95108	5.47999	6.37086	6.45969	5.16152
AP5M1	1.36236	1.84783	1.65713	2.2771	2.26261	2.93681
AP5S1	4.00818	3.54201	3.49085	5.84217	5.58171	5.07438
AP5Z1	6.79278	6.75404	7.20956	8.66657	8.07441	6.92621
APAF1	6.03486	5.89259	5.52705	5.82972	6.08166	7.57549
APBA1	0.051678	0.0309531	0.0480086	0.0203017	0.0307925	0.0211474
APBA2	0.380351	0.299957	0.306652	0.272693	0.351281	0.400785
APBA3	7.96012	7.15171	7.43471	6.66122	7.721	6.32514
APBB1	18.8947	17.5008	19.0492	18.352	18.7917	14.6967
APBB2	1.40852	1.5943	1.29379	1.07618	0.995672	1.4387
APBB3	3.80756	3.99737	4.5271	3.62583	4.16051	4.19126
APC	0.53787	0.92171	0.795469	1.47997	1.36025	3.33721
APC2	2.58948	2.25655	2.32535	3.61021	3.96314	2.70966
APCDD1L-DT	0	0.047447	0.0236542	0.0466797	0.0118002	0
APEH	51.2013	46.328	48.5721	49.1354	49.1373	33.9721
APELA	0	0	0	0	0.00845579	0
APEX1	124.235	120.205	125.927	127.604	130.645	116.576
APEX2	7.63539	7.00042	6.78863	6.96273	7.19317	6.10428
APH1A	54.7918	50.526	51.9421	51.0145	53.5043	51.9119
APH1B	5.40209	4.82617	4.63232	5.11297	5.56971	5.27317
API5	28.8926	31.7081	29.9975	27.6146	26.7678	36.4101
APIP	19.592	21.6765	22.0716	16.3822	17.7576	18.3099
APLF	0.872958	1.05354	0.920775	0.780576	0.886332	1.50622
APLN	2.35612	2.25179	1.8992	1.22908	0.974292	0.979964
APLNR	0	0	0	0	0	0.00696149
APLP1	44.0585	40.5306	45.6996	41.8303	42.4013	31.5674
APLP2	234.832	241.033	240.948	262.891	260.769	248.142
APMAP	107.393	107.782	107.852	99.3406	97.6135	87.1382
APOA1	0	0	0	0.0187578	0.0189672	0.0195392
APOA2	0	0	0.0522987	0	0	0
APOBEC3A	0.0733589	0.109848	0.146036	0.198131	0.163917	0.0187622
APOBEC3B	65.3961	64.8608	67.3996	37.6748	36.2442	29.9018
APOBEC3B-AS1	0.0709554	0	0.141251	0	0	0
APOBEC3C	31.7063	28.8963	29.215	27.3928	26.3609	25.2478
APOBEC3D	4.80357	4.66738	4.45338	4.88844	6.11515	5.23247
APOBEC3F	2.83823	2.45388	2.34748	2.31934	2.23694	2.2279
APOBEC3G	1.34478	1.48341	1.75348	1.39338	1.30878	0.694758
APOBEC3H	0	0.0209631	0.355331	0	0	0.0214832
APOBR	0.00656787	0.0590085	0.0849854	0.0516037	0.123927	0.040315
APOC1	3.65722	3.71123	3.64022	4.36365	3.87207	4.45265
APOD	0	0	0	0.14188	0.143464	0.14779
APOE	0.194159	0.264305	0.43922	0.502725	0.385635	0.108345
APOL1	5.16686	4.61377	5.15813	5.49675	5.48186	5.06597
APOL2	7.23429	7.36983	8.03951	7.94591	8.36938	6.80085
APOL3	0.141888	0.20853	0.286381	0.154836	0.191791	0.0806427
APOL6	4.34648	4.13407	4.28783	2.83637	2.81768	3.35472
APOLD1	0.787748	0.895749	1.15796	0.712184	0.616517	0.683142
APOM	0.679731	0.86855	0.866012	1.22835	0.756037	0.667574
APOO	5.32498	5.0389	4.55488	3.47291	2.67163	3.60339
APOOL	2.89372	3.4271	3.07278	3.25843	3.56445	5.47556
APP	418.147	445.565	443.397	727.838	718.238	720.167
APPBP2	4.78274	5.59686	5.07181	6.88855	5.70795	8.61137
APPBP2-DT	0.28366	0	0.451747	0.167154	0.11268	0.0580389
APPL1	6.4592	7.23576	6.25104	8.28522	7.39613	12.2506
APPL2	3.08779	3.00363	2.62435	2.50639	2.48116	2.67138
APRG1	0.048898	0.0894911	0.101397	0.0840418	0.0526066	0.09588
APRT	87.7172	83.2925	89.626	114.498	117.582	93.7881
APTR	1.68324	2.0757	2.02364	1.8995	2.03215	2.20823
APTX	13.9078	14.7218	14.9666	10.975	11.9868	11.6517
AQP1	0.10852	0.144443	0.180026	0.124344	0.134712	0.120272
AQP10	0	0	0	0.0528583	0	0
AQP11	0.529324	0.799386	0.607919	0.919756	0.795236	1.01361
AQP3	2.70206	3.4739	2.33633	2.61355	2.57496	2.21982
AQP4	0	0	0.0170904	0.00421582	0.00426287	0.0351314
AQP6	0.0489492	0.0097729	0.00974434	0	0.0194443	0.0200307
AQP7	0.0054725	0.0273152	0	0	0.00543467	0
AQP7B	0	0	0.0135685	0	0	0.0557834
AQP8	0	0	0	0	0.018213	0
AQR	4.23264	4.45847	3.69119	4.00406	4.10029	5.88856
AR	0.0119269	0.00198438	0.00395715	0.0234274	0.00197408	0.00203361
ARAP1	19.3395	17.4745	18.0599	16.2173	16.2494	11.6318
ARAP1-AS2	0	0.0545225	0	0	0	0.0279376
ARAP2	0.387064	0.484576	0.290528	0.523479	0.633296	1.07434
ARAP3	1.43599	1.02964	1.07973	0.938761	1.26271	1.10521
ARC	0.0759825	0.0168558	0.0840325	0.0331663	0	0
ARCN1	52.1167	54.4959	51.9734	50.5319	50.7564	57.1769
AREL1	16.1651	14.506	15.2187	18.2966	18.0729	18.3332
ARF1	224.062	210.206	218.422	209.133	212.349	166.444
ARF3	74.5898	69.5456	69.0434	76.5487	78.0516	76.6376
ARF4	116.365	121.772	128.514	126.607	123.728	150.575
ARF4-AS1	0.363582	0.907381	0.995203	0.981978	0.315935	1.11587
ARF5	221.373	201.909	212.465	213.055	207.332	169.218
ARF6	46.1794	46.2406	46.4765	43.6748	45.7069	48.7028
ARFGAP1	32.3683	30.9492	31.5516	30.2712	32.0249	25.5544
ARFGAP2	44.3779	42.2086	43.1838	46.055	43.3659	37.7766
ARFGAP3	17.6938	19.1735	19.1716	17.1372	17.5445	18.8984
ARFGEF1	3.47429	3.24378	3.13672	4.77707	4.17756	6.76059
ARFGEF1-DT	0.0157181	0.0235364	0	0.0154372	0.0234142	0.0321604
ARFGEF2	9.58323	10.3237	8.68775	10.796	11.6641	14.2334
ARFGEF3	2.66334	2.63531	2.54753	2.60257	2.45351	2.9699
ARFIP1	5.17302	5.3747	5.58257	4.76636	4.71141	6.58041
ARFIP2	21.4032	20.8229	20.4441	30.7699	30.6081	22.8888
ARFRP1	19.3986	19.5251	20.1155	17.7916	18.1406	14.4761
ARG2	5.13486	4.55353	3.9435	7.05262	6.67835	6.49309
ARGLU1	14.8484	15.8355	16.637	17.2159	16.43	21.6985
ARHGAP1	47.1623	43.0829	45.7676	44.7977	44.1075	40.7725
ARHGAP10	2.60989	2.72021	2.69794	2.52793	2.4776	2.5229
ARHGAP11A	3.54141	4.33459	3.75095	3.63851	3.44572	6.03151
ARHGAP11A-SCG5	0	0	0	0	0.0159415	0
ARHGAP11B	5.5858	5.17897	5.16384	4.345	4.29868	6.00752
ARHGAP11B-DT	0.160771	0.12273	0.131784	0.120745	0.183139	0.120937
ARHGAP12	4.62493	5.13317	4.8171	5.92219	6.19662	9.40304
ARHGAP17	8.98799	8.40974	8.40956	9.62762	10.3618	8.01666
ARHGAP18	5.89062	6.8098	5.9194	7.2649	6.72963	11.4061
ARHGAP19	5.17614	4.93622	4.89922	3.6267	3.10404	3.917
ARHGAP21	6.90918	6.85228	5.50654	6.57067	6.77608	9.52979
ARHGAP22	0.154941	0.128894	0.125662	0.18317	0.119677	0.0998028
ARHGAP23	15.2558	15.2359	16.284	18.8222	18.6971	16.5056
ARHGAP24	0	0.00154165	0.00461145	0	0.00153365	0
ARHGAP26	0.771016	0.765296	0.743382	1.47779	1.16053	1.37081
ARHGAP27	5.11291	5.27661	5.56125	5.23865	5.37296	4.20676
ARHGAP28	0	0	0.0239938	0	0.00398987	0.0164408
ARHGAP28-AS1	0	0	0	0.0635329	0	0
ARHGAP29	15.0446	18.1321	15.7622	28.053	28.3715	44.3243
ARHGAP29-AS1	0.0861479	0.0171998	0.257242	0.0507648	0.19677	0.0176265
ARHGAP30	0.0337623	0	0	0	0	0
ARHGAP31	3.65858	3.63902	3.45435	4.5897	4.38573	3.97052
ARHGAP31-AS1	0.478949	0.438277	0.317815	0.156796	0.158546	0.612477
ARHGAP32	1.85061	1.79002	1.53378	2.00329	2.04775	2.66154
ARHGAP33	2.30922	2.28029	2.14573	1.67905	1.54538	1.70883
ARHGAP35	15.5099	15.3102	14.8305	17.3479	17.4953	16.6105
ARHGAP39	3.78465	3.58872	3.61915	4.04306	4.10074	4.04003
ARHGAP4	0.23621	0.103163	0.286542	0.195739	0.146611	0.0830675
ARHGAP42	0.12948	0.118997	0.173883	0.294701	0.206144	0.380567
ARHGAP42-AS1	0.0133469	0	0.106279	0	0	0
ARHGAP44	1.38267	1.56431	1.35331	0.944911	1.27013	0.996058
ARHGAP45	20.3018	19.72	18.9002	15.0417	14.816	11.3321
ARHGAP5	1.48799	2.22903	1.75642	2.81625	2.5227	6.08353
ARHGAP5-AS1	0.972106	1.10628	1.85777	1.18386	1.52531	1.45197
ARHGAP8	0	0	0.0580553	0	0	0
ARHGAP9	0.0264178	0	0.0131475	0	0.00655879	0.00675658
ARHGDIA	218.05	192.544	206.18	166.656	172.751	134.103
ARHGDIB	34.234	36.8002	35.1306	26.6151	25.6423	22.6101
ARHGDIG	0.258354	0.154744	0.0514307	0.126868	0.205255	0
ARHGEF1	34.0379	32.4545	32.6636	29.5898	29.1496	24.2229
ARHGEF10	11.1122	10.2683	9.77879	9.621	10.026	10.2496
ARHGEF10L	2.11865	1.82124	2.01675	1.62939	1.61975	1.41917
ARHGEF11	5.77072	5.091	5.39082	6.78089	6.38177	6.4927
ARHGEF12	14.9986	14.9439	12.5646	24.2991	23.5273	28.6685
ARHGEF15	0.0225184	0.00561986	0	0	0	0.00575928
ARHGEF16	9.05533	8.46429	8.63078	7.61039	8.16596	6.28296
ARHGEF17	6.91968	7.17268	7.80464	8.86955	8.12017	6.45794
ARHGEF17-AS1	0.6494	0.683318	0.541563	0.775693	0.522901	0.556625
ARHGEF18	8.23351	7.88231	7.73867	7.27317	7.21397	6.48413
ARHGEF19	1.72833	1.99966	1.92904	2.38636	1.75948	2.17504
ARHGEF2	31.4164	28.3042	29.8497	17.2045	17.5081	14.5688
ARHGEF2-AS2	0.330748	0.242129	0.230448	0.184074	0.131385	0.169184
ARHGEF25	6.7103	7.33995	7.11977	7.56228	8.36222	6.5718
ARHGEF26	1.49186	1.73977	1.78917	1.57721	1.33656	1.68491
ARHGEF26-AS1	0.00958636	0.0382791	0	0	0.0190402	0.00980718
ARHGEF28	6.1162	6.75102	5.85144	9.04684	8.90065	10.1583
ARHGEF3	1.7957	2.27853	2.02064	2.25585	2.09124	2.64861
ARHGEF35	4.23063	3.4648	4.1456	4.09052	4.43428	5.38371
ARHGEF35-AS1	1.13206	0.251134	0.77624	0.370609	0.174881	0.72062
ARHGEF37	0.380557	0.553433	0.491022	0.752124	0.760519	0.586388
ARHGEF38	0	0	0.00359217	0	0	0
ARHGEF39	4.91046	5.0109	4.49152	5.38376	4.92114	4.6033
ARHGEF4	2.91038	2.77255	2.85164	2.71815	3.11259	2.0281
ARHGEF40	7.44685	6.30823	6.632	5.71998	5.65408	4.59003
ARHGEF5	8.52718	7.7015	8.13521	9.39987	9.12172	9.48501
ARHGEF6	0	0	0	0	0	0.0211655
ARHGEF7	4.82836	4.9321	4.97357	5.43682	5.25887	5.77816
ARHGEF9	3.29624	3.30597	3.39246	2.95647	2.90505	3.62913
ARHGEF9-IT1	0	0	0	0	0	0.0636976
ARID1A	15.2069	16.3926	15.6871	17.2146	18.8427	17.0839
ARID1B	5.12614	5.49477	5.59098	6.70255	6.54457	7.87765
ARID2	2.5644	2.48205	2.11967	3.72036	3.49614	6.13094
ARID3A	4.92682	4.78289	4.64404	4.7222	4.45501	4.74545
ARID3B	2.9844	2.7677	2.77133	2.34138	2.87024	2.36062
ARID3C	0.0399551	0.0664766	0.0530259	0.104642	0.145489	0.0272503
ARID4A	0.909726	1.25351	0.915063	1.45031	1.37742	3.25739
ARID4B	1.44677	2.43832	2.27319	3.77019	3.30349	7.25284
ARID5A	1.24277	1.08118	1.21216	0.955859	1.21436	0.837388
ARID5B	0.0784524	0.127264	0.120385	0.0642084	0.162313	0.143798
ARIH1	2.2517	2.20537	2.05713	2.38182	2.35935	3.10393
ARIH2	13.0907	12.9202	12.7945	14.7226	14.8817	13.7326
ARIH2OS	1.26241	0.886826	1.27206	0.780644	0.804835	0.749384
ARL1	12.5793	13.2931	13.4834	13.651	14.1616	14.7221
ARL10	0.460885	0.393803	0.363495	0.632938	0.574063	0.559408
ARL11	0.0339403	0.0067763	0	0	0	0
ARL13B	2.16492	2.31846	2.12582	2.6191	2.10939	4.32213
ARL14	0	0	0.0192316	0	0	0
ARL14EP	7.17445	8.94025	8.47291	8.27163	8.13571	11.1019
ARL14EPL	1.0076	0.56853	0.348842	0.731439	0.739603	1.21009
ARL15	2.35256	2.54821	2.46523	4.82428	5.32346	7.91898
ARL16	13.0131	13.2231	13.648	15.3108	14.9035	13.4766
ARL17A	0.189175	0.170487	0.214447	0.299333	0.294847	0.422008
ARL17B	0.220473	0.381134	0.227477	0.308954	0.285701	0.451103
ARL2	24.7985	21.3677	27.343	25.3263	24.2024	21.433
ARL2-SNX15	0.0101118	0.0100943	0	0	0.0200838	0.0206894
ARL2BP	33.8986	36.7062	38.009	30.6715	28.6021	33.2561
ARL3	8.88754	8.97919	10.1032	8.86908	8.37651	7.57485
ARL4A	5.19478	5.16117	5.54698	4.98891	4.09771	5.72648
ARL4C	54.0263	56.8183	57.6584	138.692	132.896	135.239
ARL4D	6.32272	5.37271	4.57418	3.57437	3.99713	3.53394
ARL5A	3.4964	4.39246	4.54915	5.11136	4.93818	8.635
ARL5B	1.63891	2.42901	2.16171	2.45556	2.54288	5.02655
ARL6	0.690399	0.873253	0.784802	0.758963	0.705104	1.70957
ARL6IP1	108.539	120.397	119.752	79.7649	78.3958	96.6064
ARL6IP4	70.4704	74.0189	78.3723	64.3027	72.0813	50.0229
ARL6IP5	33.0632	43.5148	39.9491	39.7392	40.9709	43.0302
ARL6IP6	9.16013	9.08403	9.1309	8.16656	9.08349	9.72787
ARL8A	28.7616	27.6695	29.0436	23.2023	25.5765	18.9135
ARL8B	27.5887	30.2365	28.9987	22.5254	24.5814	28.8409
ARL9	0	0	0	0.0101663	0	0.0105898
ARLNC1	0.245531	0.223792	0.244389	0.125813	0.0318044	0.0546058
ARMC1	6.65581	7.89658	6.38628	6.17586	6.14958	9.06521
ARMC10	13.0788	13.841	14.1918	11.4166	11.3154	11.2947
ARMC12	0.257171	0.096272	0.0959907	0.0236788	0.0558672	0.0493302
ARMC2	0.651182	0.527581	0.634065	0.486608	0.604506	0.748248
ARMC5	1.53235	1.52049	1.57117	2.00813	2.06263	1.6857
ARMC6	9.20117	7.71524	9.52255	10.5548	11.5991	9.32891
ARMC7	6.94827	6.98946	6.75678	8.99695	9.50326	7.95368
ARMC8	3.00258	3.86669	3.17237	3.31495	3.34849	4.1301
ARMC9	2.92649	2.56228	2.55178	3.08796	2.77115	2.71863
ARMCX2	1.86733	2.04053	2.02692	1.4415	1.2668	1.43079
ARMCX3	6.85634	7.60569	6.80167	7.63055	7.65072	10.3322
ARMCX5	4.20877	4.42436	4.74064	4.42589	3.53918	3.9166
ARMCX5-GPRASP2	0.0872162	0.0947475	0.140429	0.0755799	0.0585914	0.131214
ARMCX6	12.0082	14.0453	13.4015	13.0842	10.9911	10.1626
ARMH1	0.0127524	0.0509212	0.0253862	0.0939331	0.12031	0.143507
ARMH3	7.84888	7.47097	8.0006	8.90914	8.75531	7.64282
ARMH4	0.265118	0.2664	0.211803	0.236396	0.20266	0.328325
ARMT1	6.60818	8.61933	7.24969	7.55133	6.31486	8.85442
ARNT	12.9837	12.8866	12.3228	14.2305	14.3646	15.1599
ARNT2	0.362718	0.312541	0.364832	0.149993	0.144084	0.132805
ARNTL	3.08812	2.57094	2.4989	2.39045	2.83267	3.18337
ARNTL2	4.5431	5.17332	4.83011	4.96016	4.6711	5.33098
ARPC1A	236.302	242.509	239.168	189.852	190.893	174.73
ARPC1B	193.268	188.804	184.524	208.511	215.959	164.65
ARPC2	98.9703	103.748	105.755	97.3531	89.6298	93.3616
ARPC3	203.85	228.438	226.539	202.895	197.839	222.605
ARPC4	64.7866	60.8814	60.0387	65.0571	61.774	60.676
ARPC4-TTLL3	0.137426	0.14966	0.242487	0.325154	0.316376	0.35787
ARPC5	24.5185	26.2429	26.9193	24.3761	23.1625	24.0781
ARPC5L	12.0775	13.7581	12.6951	12.6626	12.5691	12.1222
ARPIN	5.82125	5.17321	5.84544	4.41729	4.01542	4.65706
ARPP19	27.7342	29.5475	27.6213	29.5472	29.3382	40.8495
ARRDC1	7.63	6.59722	7.03459	7.05376	7.86472	6.96763
ARRDC1-AS1	6.38351	6.59775	5.5195	6.19024	5.53896	4.733
ARRDC2	9.58742	8.63565	9.27405	9.05963	9.34514	7.45981
ARRDC3	40.1929	47.548	41.8366	43.7521	42.3029	65.6493
ARRDC3-AS1	0.189129	0.0794956	0.108987	0.146644	0.148281	0.0712843
ARRDC4	1.16495	0.942587	0.872701	0.126456	0.292268	0.200721
ARSA	7.8931	7.73843	8.32881	11.1036	11.6708	9.55465
ARSB	1.5405	1.48718	1.30604	1.92947	1.47766	1.62234
ARSD	1.81308	1.87377	1.90574	3.09954	2.90254	2.62064
ARSG	0.205734	0.121491	0.126904	0.00853758	0.0316539	0.0770745
ARSI	0.216012	0.35141	0.207044	0.408586	0.365476	0.278281
ARSJ	1.59236	1.65553	1.6653	1.94586	1.77082	2.12451
ARSK	1.19569	1.64487	1.33527	2.1911	2.02007	2.55089
ARSL	1.00723	0.739078	0.668368	1.3697	0.854932	0.959978
ART1	0	0	0	0.0093861	0	0
ART4	0	0	0	0	0.0528111	0
ART5	0	0	0	0.060922	0	0.0158649
ARV1	7.01111	7.42845	6.97852	6.91708	6.36132	8.33
ARVCF	2.30467	1.96211	2.06801	1.82809	2.02883	1.71846
ARX	0.172177	0.171879	0.162808	0.346653	0.179536	0.158529
AS3MT	0	0.0101479	0	0	0	0
ASAH1	16.1788	20.283	17.8178	18.0436	18.9353	23.4802
ASAH1-AS1	0.11855	0.226827	0.108166	0.0970257	0.215839	0.222348
ASAH2	0.121775	0.272303	0.242417	0.157869	0.154794	0.24916
ASAH2B	0.456892	0.598632	0.497403	0.425354	0.283583	0.54045
ASAP1	21.7653	23.314	21.0736	25.2814	25.4981	32.1914
ASAP1-IT2	0.0122626	0	0	0	0	0.0250902
ASAP2	10.3629	10.5231	9.5053	13.9387	14.1897	15.8323
ASAP3	5.55419	4.98043	5.36928	4.28319	4.4217	3.19437
ASB1	10.2137	10.3006	9.61941	8.57934	8.49205	8.18983
ASB12	0.0393139	0.176606	0.0195656	0.193056	0.253774	0.0402195
ASB13	10.239	9.19638	9.89941	9.91191	9.65842	8.88063
ASB14	0.0625291	0.0249684	0.0124477	0.0368469	0	0.0639695
ASB16	0.0697629	0.0928562	0.0578655	0	0.0230936	0
ASB16-AS1	2.85546	2.74046	3.09458	3.34581	2.87952	3.316
ASB2	0.245903	0.352874	0.267706	0.128301	0.144996	0.133645
ASB3	0.06312	0.0720123	0.0359009	0.0974156	0.0537289	0.166047
ASB5	0.00507755	0	0	0	0	0
ASB6	7.52626	7.63206	7.15737	7.29076	7.30766	5.92279
ASB7	3.12967	3.40251	2.7306	3.07373	2.8458	3.75207
ASB8	5.7128	6.84702	6.35316	6.56312	6.73268	5.74519
ASB9	0.892972	0.696045	0.450499	1.09326	1.37272	1.35154
ASCC1	9.22385	10.6367	10.0684	10.7629	9.65782	11.0929
ASCC2	12.4432	12.1339	11.407	12.1465	11.4655	9.95955
ASCC3	2.10358	2.5576	1.97519	3.07215	3.20835	4.94072
ASCL5	0	0.0244226	0.0121756	0	0.0121479	0
ASF1A	4.06221	5.38308	4.93959	3.69817	4.03413	4.43842
ASF1B	18.8449	16.5012	17.6125	15.6116	17.3821	14.2556
ASGR1	1.02375	1.02198	0.913578	0.797426	1.13937	0.595896
ASH1L	3.09094	3.48849	2.58536	5.48858	5.40896	8.0372
ASH1L-AS1	1.0094	0.925394	1.14824	0.950892	1.08425	1.22232
ASH2L	9.17361	8.3822	8.35126	7.49001	8.06224	7.11321
ASIC1	8.09385	7.94492	8.30459	10.1139	9.73634	8.88656
ASIC3	0.710352	1.19261	0.674911	0.803359	0.598556	1.06805
ASIC4	0	0	0	0	0.00902013	0
ASIC4-AS1	0	0.0930299	0	0	0	0.0238345
ASIP	0	0.022602	0	0.0222365	0.0224847	0.0463256
ASL	38.259	38.8781	38.2306	40.0296	37.6856	31.5361
ASMTL	2.67538	2.64161	1.52998	1.32811	1.5265	0.139339
ASMTL-AS1	0.03302	0	0	0	0.00819794	0.0168903
ASNS	1.07849	1.15352	1.43386	0.348026	0.351911	0.228547
ASNSD1	7.8817	9.30143	9.30509	9.09014	8.81203	12.7025
ASPDH	0	0	0	0.0191245	0	0
ASPH	9.33063	10.6335	9.36047	8.42157	8.53195	11.402
ASPHD1	4.27998	4.18489	4.40315	5.01908	6.16149	4.75435
ASPHD2	1.86975	1.68945	1.87577	1.88714	1.68068	2.03379
ASPM	2.31102	5.03058	4.79453	4.37279	4.06642	12.8674
ASPRV1	0	0	0	0.0792617	0.0320586	0.0330253
ASPSCR1	6.71777	7.54441	7.41788	12.202	9.04989	7.70229
ASRGL1	5.03929	4.18608	5.21505	4.82414	4.78765	5.31356
ASS1	38.0061	35.9417	36.4356	39.009	40.2719	34.6193
ASTE1	1.19951	1.56161	1.08316	1.31167	1.34473	1.35998
ASTN2	0.583167	0.682025	0.631458	0.635049	0.656676	0.703938
ASXL1	22.8765	22.0233	22.255	29.1247	29.3033	27.7279
ASXL2	2.69466	2.59789	2.22855	3.44543	3.37356	4.35182
ASXL3	0	0	0	0	0	0.00113351
ATAD1	4.6467	5.35694	4.98921	4.74179	4.44045	6.4177
ATAD2	13.6313	16.8482	12.8171	16.126	16.3818	27.4955
ATAD2B	0.241831	0.290019	0.276248	0.368218	0.385222	0.511408
ATAD3A	16.9951	15.1725	15.7385	16.2672	18.2069	13.4286
ATAD3B	4.49167	4.3391	3.59526	5.60153	5.4782	4.46111
ATAD3C	0.0193365	0.038606	0.0320776	0.0633027	0.0448065	0
ATAD5	0.730499	1.13885	0.912747	0.80903	0.805712	1.69818
ATAT1	0.251495	0.0886092	0.382851	0.276058	0.301176	0.544845
ATE1	2.16399	2.4137	1.99452	3.21481	2.85502	4.3917
ATE1-AS1	0.130943	0	0.156401	0	0.0520151	0
ATF1	3.06345	3.67262	2.97852	3.76203	3.71468	5.75459
ATF3	5.97868	4.77119	5.29352	1.97149	2.14021	2.12474
ATF5	17.3815	14.8958	15.6146	22.469	22.2992	23.1008
ATF6	10.8586	10.8461	10.8773	10.2894	10.1315	11.5576
ATF6-DT	0.00865671	0.0172835	0.0172329	0	0.0429844	0.0531367
ATF6B	39.492	36.8105	37.6564	37.1933	36.2144	35.0458
ATF7	4.84794	4.78369	5.16841	5.45263	5.56321	6.87898
ATF7IP	6.01821	5.54314	5.20855	7.96678	7.5792	11.0823
ATF7IP2	0.217021	0.281639	0.224653	0.242982	0.155175	0.195378
ATG10	1.90466	1.61537	1.77046	1.62326	1.62574	1.63612
ATG101	32.0873	26.5562	25.9156	30.1165	30.691	21.8492
ATG12	13.0815	14.1789	14.8001	10.8799	10.3096	14.5306
ATG13	26.5293	25.9917	26.2604	28.0959	29.0745	26.6444
ATG14	4.94774	4.41926	4.8729	4.83884	5.02215	5.20557
ATG16L1	7.46424	7.56901	7.55423	7.78673	7.66875	7.16127
ATG16L2	2.37736	2.16649	1.91047	2.12859	1.90902	1.889
ATG2A	7.89274	7.74685	7.62727	8.46713	8.9137	7.28144
ATG2B	1.34915	1.48093	1.4088	1.74689	1.86222	2.82047
ATG3	15.6555	17.0603	17.1726	12.4382	13.6049	14.432
ATG4A	3.07599	4.11402	3.07861	3.45497	3.18975	3.79882
ATG4B	15.8897	14.8418	16.6664	16.02	14.7271	14.1919
ATG4C	2.25874	2.50818	2.52611	1.38752	2.0499	3.03775
ATG4D	7.71286	6.59263	5.55462	5.43294	5.10636	5.01105
ATG5	8.75073	10.1618	10.1543	8.55046	8.8602	13.3752
ATG7	5.75854	5.60386	5.93219	5.95882	5.95868	4.99584
ATG9A	22.5337	19.2369	21.4032	24.8495	23.9328	22.8906
ATG9B	0.0621222	0.129667	0.00562122	0.0166396	0.0336506	0.0346654
ATIC	49.4567	47.4775	45.7578	50.1416	47.6997	46.0926
ATL1	1.08208	1.35245	1.2872	0.73441	0.716398	0.756002
ATL2	4.3663	3.87822	4.10833	2.86628	3.35372	4.51729
ATL3	12.214	12.8555	11.9749	10.181	9.89198	11.7292
ATM	2.07868	2.71891	1.92744	3.99732	4.00983	8.31608
ATMIN	11.3979	14.4576	12.3299	12.8441	12.1628	16.0016
ATN1	39.2151	39.4593	39.3025	45.8507	46.6522	44.7442
ATOH7	0.0163959	0.0163675	0.0979181	0.0966169	0	0.0167736
ATOH8	0	0	0.00380968	0	0	0.0156626
ATOX1	72.8125	73.6894	72.2109	70.8358	76.4051	61.2904
ATP10D	1.03835	0.943334	0.825328	1.1335	1.39467	1.45966
ATP11A	4.82149	4.83433	4.47801	5.40016	6.0147	6.05714
ATP11B	2.41903	2.94451	2.3775	3.09861	3.15586	5.23745
ATP11B-DT	0	0.0665359	0	0	0	0.10228
ATP11C	2.40012	2.74985	2.57025	4.3088	4.20187	6.84388
ATP12A	0.0225184	0.00561986	0.00560343	0	0	0
ATP13A1	11.0906	10.2834	9.95062	12.9514	13.8478	12.5045
ATP13A2	49.3854	46.4813	45.8239	42.8174	44.5687	38.4898
ATP13A3	6.64632	7.4676	6.72948	8.13013	8.15032	13.7536
ATP13A3-DT	0.044355	0.132835	0.176596	0.152468	0.0880969	0
ATP13A4	0	0.002556	0.0076456	0	0.0127137	0.00261942
ATP1A1	103.795	102.175	104.53	105.929	106.652	98.401
ATP1A1-AS1	0.841206	1.03789	0.893742	0.872583	0.675822	1.12166
ATP1A3	17.2741	16.5183	16.3348	12.5204	12.6669	10.7617
ATP1B1	24.0062	27.3193	27.0605	29.0299	28.6619	31.4119
ATP1B2	0.0583264	0.00727818	0.0870829	0.0429628	0.152048	0.0969636
ATP1B3	58.144	63.6969	60.0077	70.8643	69.0307	87.8179
ATP23	1.93412	2.11088	2.26993	1.36087	1.29005	1.58737
ATP2A1	0.779829	0.904719	0.594391	0.75899	0.579085	0.632484
ATP2A1-AS1	3.83815	4.38495	4.75417	1.75912	1.567	1.43974
ATP2A2	28.9797	29.8227	29.3291	31.7673	32.3932	30.5564
ATP2A3	1.72623	1.48913	1.88275	1.04592	1.17595	0.884963
ATP2B1	2.88814	3.07214	2.99289	3.65595	3.8561	7.28161
ATP2B1-AS1	0.0498439	0.149273	0.148837	0.179494	0.173248	0.178472
ATP2B4	8.46066	9.91372	8.82605	9.42281	9.49323	10.1982
ATP2C1	15.6619	16.2821	15.2232	16.7246	16.5503	20.6072
ATP2C2	0.0177705	0	0	0	0	0
ATP2C2-AS1	2.0436	1.63371	1.14935	1.72967	1.46023	1.70824
ATP4A	0	0.0400896	0	0	0	0
ATP5F1A	75.0896	80.9761	77.5832	84.9247	83.276	85.859
ATP5F1B	472.112	456.75	462.603	398.858	383.765	379.26
ATP5F1C	145.292	155.572	152.725	136.291	138.939	145.975
ATP5F1D	94.3901	89.3292	95.795	92.5062	92.8427	66.6809
ATP5F1E	0.538121	0.413223	0.542487	0.840183	0.863264	0.783428
ATP5IF1	37.0743	38.9074	39.7001	35.4912	39.2166	37.9958
ATP5MC1	43.141	52.457	52.4189	51.7602	45.9057	51.4708
ATP5MC2	53.3149	54.5835	56.355	55.8379	54.9164	60.8279
ATP5MC3	42.4335	41.7149	41.6364	42.0316	41.3037	37.2678
ATP5ME	137.925	152.702	140.229	169.526	168.071	147.577
ATP5MF	124.92	148.219	145.94	137.595	122.94	111.119
ATP5MG	177.004	180.933	181.554	180.233	184.274	195.946
ATP5MGL	0	0	0	0.244908	0.0309552	0
ATP5MJ	63.7848	64.5462	60.8523	56.7233	57.3284	65.6864
ATP5MK	82.5025	91.199	84.0216	73.2977	72.6642	70.2831
ATP5PB	59.2687	69.251	65.5396	59.7822	59.8001	64.8708
ATP5PD	207.136	203.879	219.606	163.028	161.152	139.193
ATP5PF	47.2555	46.2958	51.8748	46.4597	45.1327	45.2376
ATP5PO	155.428	175.121	172.904	143.331	143.099	146.639
ATP6	5282.53	4865.7	4728.11	6865.16	6690.02	8252.78
ATP6AP1	71.1172	65.0779	68.4699	85.4445	84.7181	79.4686
ATP6AP2	104.609	118.434	119.547	102.75	101.702	119.849
ATP6V0A1	14.2596	12.5013	13.5039	11.3033	12.1772	14.4083
ATP6V0A2	1.39783	1.45167	1.45491	1.43189	1.51877	1.59532
ATP6V0A4	1.54656	1.1467	1.34775	1.0021	1.00692	1.0898
ATP6V0B	42.5425	40.7224	41.3254	36.4737	41.98	32.3181
ATP6V0C	105.391	97.3192	102.17	100.556	100.706	98.9763
ATP6V0D1	56.2031	53.9162	51.6377	74.2422	75.7057	64.4734
ATP6V0D1-DT	0.443127	0.483319	0.294045	0.596393	0.431914	0.461729
ATP6V0E1	81.1399	81.8054	83.3133	87.6016	90.2178	105.902
ATP6V0E2	26.9727	25.025	24.822	27.5089	28.0038	23.9312
ATP6V0E2-AS1	0.88455	0.656188	0.452335	0.199252	0.346539	0.28227
ATP6V1A	12.8746	14.3141	12.6034	15.5422	16.4185	20.1549
ATP6V1B1	0.104644	0.0940169	0	0.0102774	0.0727447	0.0107055
ATP6V1B1-AS1	0.65957	0.210697	0.472683	0.414579	0.340605	0.377867
ATP6V1B2	27.0157	27.1517	25.6923	21.6425	22.2131	22.651
ATP6V1C1	6.98764	8.79775	7.54026	8.17365	9.4763	12.0183
ATP6V1C2	0.0791789	0.0431137	0.150457	0.0141388	0.0285933	0.0147278
ATP6V1D	26.9458	33.725	33.6109	24.7202	24.1454	27.0566
ATP6V1E1	70.2522	81.2709	77.1369	61.7941	59.2119	67.6482
ATP6V1E2	1.34624	1.2572	1.28955	1.10892	0.97754	1.05145
ATP6V1F	149.726	149.663	155.211	135.366	136.227	119.103
ATP6V1FNB	0.333525	0.0704313	0.191524	0.0314965	0.0573265	0.150919
ATP6V1G1	49.4442	53.6694	55.9074	50.7357	50.6374	55.8974
ATP6V1G2	0.269065	0.0839374	0.351507	0.016516	0.0167003	0.120428
ATP6V1G2-DDX39B	0.367368	0.312801	0.0537735	0.201624	0.257526	0.176861
ATP6V1H	12.6602	13.1148	12.622	12.4645	11.367	11.7097
ATP7A	1.53092	1.69515	1.3399	1.72535	1.79121	2.55331
ATP7B	1.22653	1.26642	1.09117	1.29712	1.35538	1.16457
ATP8	2327.51	2251.54	2050.71	3166	3054.85	3728.93
ATP8A1	0.917017	0.844098	0.927572	1.22813	1.57595	2.35144
ATP8A2	0.00388964	0.0025886	0.00129052	0	0.00128758	0
ATP8B1	2.21115	2.08055	1.64322	1.70942	1.75447	2.47989
ATP8B2	12.2814	12.0521	12.2836	12.2045	12.5847	12.134
ATP8B3	7.89624	7.97237	7.93964	6.6997	7.77114	6.71241
ATP8B4	0.0021459	0	0	0	0	0
ATP9A	5.38845	5.7175	5.22152	3.18586	3.66814	3.24079
ATP9B	1.58092	1.44921	1.47534	1.64783	1.71969	1.72014
ATPAF1	5.98728	5.92811	6.08383	4.72235	4.82362	4.89127
ATPAF2	4.97448	4.80144	5.82851	4.99881	5.47173	4.15383
ATPSCKMT	7.2092	9.09845	7.86352	7.90576	7.53959	9.21908
ATR	1.96542	2.15852	1.85681	2.78389	2.94428	5.04996
ATRAID	39.5482	37.106	40.3076	34.311	33.5043	27.6922
ATRIP	0.0394072	0.0442564	0.0490301	0.0532164	0.0146756	0.0302362
ATRIP-TREX1	0.040553	0.0289163	0.0172991	0.0796563	0.0287662	0.0474139
ATRN	18.3121	18.7197	17.1986	18.4143	18.0149	19.25
ATRNL1	0.036002	0.0728776	0.0935682	0.0756277	0.0615748	0.0777549
ATRX	1.53724	2.64419	2.30476	4.17875	3.74713	10.8348
ATXN1	0.39339	0.303882	0.403215	0.565739	0.558101	0.510252
ATXN1-AS1	0.00527432	0.0579171	0.0734973	0.0725206	0.125709	0.205041
ATXN10	21.3971	20.9752	19.6195	23.8438	26.0697	25.3244
ATXN1L	11.0175	10.8347	10.4671	11.0591	13.3533	12.1942
ATXN2	8.20814	7.22056	7.43523	8.23455	7.58244	8.86498
ATXN2-AS	0.102915	0.0513683	0.102436	0.252688	0.102203	0.263213
ATXN2L	31.0282	30.1234	29.6334	25.9195	26.7089	23.2857
ATXN3	1.46162	1.44103	1.66728	2.05375	1.6563	2.90914
ATXN7	3.4787	3.56756	3.13772	4.2971	4.32304	5.50355
ATXN7L1	1.70985	1.5176	1.48757	1.43308	1.48738	1.93995
ATXN7L2	1.29041	1.06553	1.6174	1.62199	1.8774	1.38532
ATXN7L3	17.8334	17.7515	17.669	25.0381	25.4142	23.2384
ATXN7L3-AS1	0.165835	0.70734	0.225087	0.681094	0.299433	0.925389
ATXN7L3B	13.7084	13.8713	13.0377	13.9046	13.3858	13.8062
AUH	1.44701	1.77569	1.57491	1.86979	2.09848	2.79358
AUNIP	3.9927	5.1084	4.73405	2.41157	2.82782	2.26926
AUP1	67.4904	64.2872	68.877	66.0827	64.4284	54.1037
AURKA	46.8821	48.5386	51.049	36.8564	36.3256	40.8475
AURKAIP1	45.7997	45.4859	46.3719	45.1294	45.5831	35.5745
AURKB	72.113	63.9536	67.4361	48.3676	46.3363	43.8182
AURKC	0.52249	0.347724	0.365969	0.589173	0.92245	0.752295
AUTS2	0.00918424	0	0.00228539	0.00676505	0.0114009	0.0046979
AVEN	1.58489	1.82625	1.62259	1.94792	2.23948	2.48305
AVIL	0.0226876	0.0849314	0.0790376	0.0891284	0.0450616	0.121854
AVL9	7.473	7.4906	7.06455	7.62076	7.26667	8.80315
AVPI1	2.73197	2.98093	3.0987	2.23074	2.0979	1.15371
AVPR1B	0.00991061	0.0197869	0.00493227	0.00973346	0	0
AVPR2	0.206362	0.0772519	0.0641885	0	0	0
AWAT2	0.0462066	0	0	0	0	0
AXDND1	0.0284763	0.028427	0.0283439	0.0111869	0.0565589	0.0699174
AXIN1	7.6494	6.70515	6.92334	7.97291	7.50528	6.06778
AXIN2	0.398263	0.457673	0.276567	0.582169	0.694443	0.639582
AXL	103.867	99.0257	98.0193	70.5356	70.9627	62.8065
AZGP1	0.189795	0.0210519	0	0	0	0
AZI2	6.1567	6.4147	6.35366	7.22445	6.43298	9.73276
AZIN1	38.5981	41.0507	39.9759	27.9025	28.8094	36.9053
AZIN2	0.221803	0.365518	0.280346	0.280078	0.153839	0.176488
AZU1	0.0549181	0.0274115	0.136657	0.242714	0.0272692	0.168549
B2M	141.904	157.79	161.799	131.079	130.525	152.686
B3GALNT1	3.33444	4.18652	3.53405	2.74924	2.58063	3.60076
B3GALNT2	3.2388	3.1011	2.75022	3.58316	3.30715	4.24167
B3GALT1-AS1	0	0	0	0	0.0268256	0.0552691
B3GALT4	1.03833	0.992738	0.756934	0.976683	0.653549	0.718141
B3GALT5	0.112087	0.159585	0.102421	0.0721858	0.0711668	0.0657936
B3GALT6	6.79237	7.33902	6.82266	7.8569	7.52136	7.70276
B3GALT9	1.95058	2.19866	2.19223	1.4463	0.936475	1.381
B3GAT2	0.0415909	0.0490678	0.0752682	0.144823	0.0675873	0.0657574
B3GAT3	13.9947	13.1891	12.8831	12.5972	12.7726	10.0626
B3GLCT	2.35627	2.68595	2.69395	2.53827	2.69836	3.18149
B3GNT2	8.3889	8.93963	10.3095	8.49561	8.71155	9.22379
B3GNT3	1.60417	1.31187	1.38923	0.667581	0.513025	0.667574
B3GNT4	0.654724	0.636391	0.797451	1.07452	1.27473	0.784378
B3GNT5	2.12602	2.53089	1.97115	1.95859	2.00111	3.39555
B3GNT6	0	0.00993298	0	0	0	0
B3GNT7	0.650181	0.430426	0.497291	0.188207	0.496159	0.273065
B3GNT8	0	0.0132669	0	0	0	0
B3GNT9	5.06956	4.5455	4.75241	6.01094	5.00705	4.40367
B3GNTL1	2.76471	2.48943	2.57815	2.48526	2.57229	2.67805
B4GALNT1	11.8954	12.4553	12.6749	11.5949	11.9871	11.502
B4GALNT3	5.29573	5.2413	4.80628	8.87032	9.03687	8.14513
B4GALNT4	12.529	10.9695	11.8204	12.1224	12.144	9.64613
B4GALT1	28.768	28.4533	28.6342	25.1116	26.2432	24.6386
B4GALT1-AS1	0.370065	0.166241	0.442014	0.29076	0.27563	0.0567884
B4GALT2	24.8352	21.8095	25.089	23.0914	25.2808	19.7555
B4GALT3	21.4583	18.98	18.9245	19.9404	18.9442	19.2016
B4GALT4	6.84793	7.81385	8.10766	5.53334	5.71981	5.83235
B4GALT5	49.6208	48.6662	48.0672	71.583	72.8954	75.93
B4GALT6	0.702695	0.767602	0.613434	0.707105	0.534818	0.86914
B4GALT7	12.2969	9.75088	10.5656	11.6733	9.52704	7.87697
B4GAT1	18.5394	15.4723	16.267	17.9765	17.1296	13.9773
B9D1	3.35803	3.09463	3.25198	2.98748	3.14714	3.12307
B9D2	2.57201	1.88181	2.05122	3.21638	3.15709	2.77834
BAALC-AS1	0.13722	0.0342455	0.0341454	0	0.0340678	0.0701902
BAAT	0.0268884	0.0335523	0.00669085	0	0.0267025	0.0137539
BABAM1	63.4339	60.5655	63.9974	59.2749	58.4857	46.5465
BABAM2	15.5658	14.8746	14.977	13.4044	12.7587	13.6511
BABAM2-AS1	0	0.0299726	0.05977	0.0589757	0.029817	0.107507
BACE1	1.06177	1.18612	1.37557	1.5435	1.45612	1.53452
BACE2	0.367474	0.388904	0.393267	0.214373	0.274386	0.282661
BACH1	8.29184	9.32015	7.69742	6.97128	6.21082	10.0835
BACH1-IT2	0	0	0.0618194	0.0609979	0.123358	0.0635388
BACH2	0	0.00683968	0.00954757	0.00269163	0	0
BAD	28.3237	28.681	27.1794	34.4721	34.1496	24.1468
BAG1	12.6092	12.7305	13.4396	14.2279	14.3996	13.0997
BAG2	2.12934	2.39962	2.64694	2.37321	2.5908	3.37569
BAG3	13.362	13.1835	13.4257	10.9741	11.4926	9.80959
BAG4	2.84243	2.9856	3.04185	3.1413	3.38851	4.40131
BAG5	10.5598	10.5464	10.0531	10.2462	9.93311	11.7538
BAG6	62.8552	58.2673	59.9308	65.9437	67.1175	59.0847
BAHCC1	3.64815	3.90535	3.59302	4.07485	3.93213	3.40444
BAHD1	7.04788	7.0974	7.53581	6.7304	6.43243	5.11819
BAIAP2	2.00343	1.96355	2.13935	1.84912	1.80845	1.33768
BAIAP2-DT	8.33746	8.22181	8.09124	9.37797	9.28124	7.68809
BAIAP2L1	47.4261	46.7165	48.049	43.3774	43.0677	40.6127
BAIAP2L2	0.00705334	0.12674	0.0140411	0.0761999	0.119078	0.101021
BAIAP3	1.96254	1.84231	1.76076	1.20687	1.26952	0.865726
BAK1	14.2981	14.0033	13.4452	12.8201	14.0273	10.2204
BAMBI	0.500758	0.38227	1.0555	0.405018	0.277901	0.210944
BANF1	121.763	116.701	119.927	96.3343	101.813	90.404
BANK1	0.120624	0.177082	0.127126	0.341467	0.204348	0.21777
BANP	1.09198	1.15377	1.06449	1.49997	1.33784	1.27069
BAP1	30.5807	29.6799	29.714	33.1718	31.9356	25.8859
BARD1	4.00684	4.8052	4.04116	3.23872	3.10761	4.44829
BASP1	159.529	175.74	176.794	156.86	154.747	149.422
BASP1-AS1	0.180256	0.254921	0.142039	0.302433	0.290891	0.222826
BATF2	0.340117	0.613342	0.338536	0.193957	0.381349	0.179588
BATF3	8.26235	8.52364	6.65374	7.14632	7.69608	5.38631
BAX	48.7375	43.5855	48.7992	50.6771	50.6337	42.8892
BAZ1A	3.34245	4.17897	3.55412	6.31721	6.45249	10.3
BAZ1A-AS1	0.986134	1.10475	1.57048	1.47428	1.43633	1.64779
BAZ1B	30.1037	30.2512	28.0075	30.9587	30.4351	35.9956
BAZ2A	22.4964	22.5016	22.1487	22.9927	23.4506	22.0629
BAZ2B	0.619688	0.607725	0.484324	1.45295	1.13113	2.94212
BAZ2B-AS1	0.669281	0.911076	0.767105	1.01585	1.19839	1.01667
BBC3	10.3668	9.07221	9.44216	6.29005	6.65173	5.02933
BBIP1	3.05194	3.77071	3.24402	3.00664	3.69501	4.74119
BBLN	53.1748	54.1551	55.4038	70.382	71.6168	54.6021
BBOF1	0.853622	1.13619	1.23975	1.22327	1.14629	1.9388
BBOX1-AS1	6.45851	7.33226	7.66797	7.95992	8.67758	9.112
BBS1	8.7923	7.74362	8.57479	8.96195	8.5259	8.04164
BBS10	3.03639	3.45619	3.54336	2.13204	2.26675	3.52051
BBS12	0.760416	0.863563	0.7916	0.856449	0.692807	0.992042
BBS2	21.6683	23.5236	23.2849	20.5596	21.2811	21.9316
BBS4	6.82644	7.80342	7.54968	6.41521	5.99056	7.35798
BBS5	3.18511	3.80922	4.40233	1.83509	2.53674	3.01651
BBS7	1.66228	2.30427	2.146	1.81845	1.88369	2.87076
BBS9	1.71404	1.95446	1.71833	1.993	1.85383	2.38843
BBX	4.56193	5.62544	4.79567	7.50958	7.77419	11.4564
BCAM	31.5908	30.6159	33.0624	35.6245	35.1066	30.9967
BCAN	0.0845068	0.120515	0.0720977	0.0770679	0.0239779	0.0185257
BCAN-AS1	8.74897	8.78109	9.20577	6.80483	7.13417	6.95373
BCAP29	0.0649618	0.0947799	0.0746075	0.0736161	0.133988	0.173814
BCAP31	118.976	108.53	118.569	113.175	111.463	110.547
BCAR1	20.7253	20.2437	19.8447	20.0711	22.1512	16.2367
BCAR3	39.5566	37.6069	39.8706	46.5612	48.9523	43.0145
BCAR3-AS1	0.111612	0.127335	0.0952225	0.187914	0	0.114183
BCAR4	0.0189539	0	0	0	0	0
BCAS1	0.0071485	0.0214084	0	0	0	0.0585053
BCAS2	22.4246	26.9292	25.7423	22.8487	23.2007	35.8505
BCAS3	13.0771	12.6694	12.2353	13.9158	13.2724	11.4853
BCAS4	7.87741	6.46289	7.7256	5.15063	5.48828	3.89993
BCAT1	0.959718	1.17642	1.12591	0.80321	0.626256	1.05642
BCAT2	31.9968	31.2724	32.3817	33.4233	31.0012	28.6203
BCCIP	5.94965	8.11935	6.12162	6.47797	7.52397	8.63993
BCDIN3D	1.4514	1.29475	1.58297	1.62259	1.83237	1.06623
BCDIN3D-AS1	0.346804	0.362306	0.264915	0.245552	0.280331	0.24753
BCHE	0	0.0516887	0	0	0	0.0635652
BCKDHA	41.7758	36.2658	42.9193	44.0058	43.8865	43.7912
BCKDHB	2.34414	2.63295	2.28698	2.7758	2.69717	3.19157
BCKDK	23.7284	21.4529	21.3274	20.0223	20.2144	16.6528
BCL10	7.93791	8.32731	8.11456	6.87884	7.09348	8.48226
BCL10-AS1	0.757258	0.867939	0.865402	0.661086	0.779876	0.774701
BCL11A	0.114532	0.106168	0.0135714	0.0321386	0.0595785	0.0223182
BCL11B	0.055488	0.055392	0.095926	0.111861	0.0841068	0.107557
BCL2	0.509548	0.508666	0.433016	0.516964	0.381906	0.454895
BCL2A1	0.327702	0.535312	0.207568	0	0	0
BCL2L1	116.628	109.898	112.159	111.88	108.321	96.186
BCL2L11	2.5869	2.15309	2.17255	3.25522	2.89656	3.19233
BCL2L12	18.6516	16.2953	18.1378	13.9875	14.5516	10.7128
BCL2L13	12.6004	11.9409	12.3811	11.6533	11.6981	11.5028
BCL2L15	0.0049761	0.0198699	0	0.0830815	0.0395336	0.0865422
BCL2L2	7.52937	7.91924	7.59134	7.87318	8.12692	8.05164
BCL2L2-PABPN1	0.0381984	0.0228794	0.0228125	0.0450187	0.0682818	0.117235
BCL3	11.1229	12.0376	12.0261	15.3179	15.3899	14.8288
BCL6	0.305758	0.26739	0.332003	0.431825	0.41657	0.491175
BCL6B	0.0776748	0.0916386	0.0421711	0.131767	0.0561002	0.007224
BCL7A	2.51357	2.50922	2.76386	2.43632	2.30669	2.05313
BCL7B	34.128	35.9075	33.1222	38.7663	38.9357	41.4659
BCL7C	11.2766	11.1043	12.9309	9.20309	8.68542	7.167
BCL9	6.50702	6.57209	6.4928	6.65946	7.22134	6.65691
BCL9L	25.4859	25.3221	26.027	26.5302	27.5449	23.4584
BCLAF1	7.29374	8.99183	7.3893	11.6281	11.1637	21.8929
BCLAF3	0.546931	0.812318	0.707041	0.805732	0.930641	1.22482
BCO1	0.34513	0.158299	0.0835604	0.274833	0.277901	0.238568
BCO2	0.00831565	0.099615	0.00827699	0.187841	0.0165163	0.0595504
BCOR	10.1738	9.41224	9.74375	7.35123	6.75833	6.83711
BCORL1	5.91866	5.43652	5.74359	6.74413	6.95552	5.76884
BCR	10.4167	10.0908	10.3573	12.6718	12.8023	9.27057
BCS1L	10.6954	11.2933	10.3999	10.0658	8.70661	7.77393
BCYRN1	0.37358	0.124311	0.247896	0.244602	0.247332	0
BDH1	2.68426	2.12317	2.31024	2.19877	2.00552	2.03094
BDH2	1.98409	2.35829	2.09013	2.97222	2.9134	3.64889
BDKRB2	0.162047	0.0435525	0.173701	0.0918175	0.0680844	0.0382568
BDNF-AS	0.399988	0.334104	0.601255	0.569214	0.30805	0.501063
BDP1	1.20492	1.80061	1.62272	2.44207	2.19738	5.92805
BEAN1	0.588978	0.735672	0.727747	1.22814	1.33405	1.1576
BEAN1-AS1	0.103128	0	0	0	0	0
BECN1	36.7903	40.8648	36.1254	34.2811	35.5068	34.8857
BEGAIN	0.220295	0.0602502	0.126156	0.0503845	0.0299687	0.0463087
BEND3	1.2233	1.04572	1.48003	1.03226	1.24277	1.01772
BEND4	0.0432836	0.0230446	0.0287216	0.0425099	0.0315219	0.0590408
BEND6	0.00417105	0	0	0	0.0124267	0.00426713
BEND7	2.18785	1.86599	2.19177	2.03748	2.25007	2.16581
BEND7-DT	0	0	0.0843183	0	0	0
BEST1	1.12739	1.36117	0.826446	1.04364	1.35789	0.759813
BEST2	0.0247691	0	0	0	0.0245979	0
BEST3	0.0549527	0.078368	0.0195347	0.0655355	0.0857573	0.072281
BEST4	0.550005	0.471623	0.603597	0.754858	0.630234	0.44004
BET1	22.6519	27.9344	27.2669	20.3972	18.2201	22.778
BET1L	22.5532	21.1579	22.2371	20.4405	21.7311	20.3103
BEX2	0.222369	0.310778	0.0221336	0.131037	0.353331	0.159244
BEX3	69.3792	73.8207	76.3825	78.3479	81.5087	75.3845
BEX5	7.22894	6.24744	6.86481	5.49413	5.45399	4.57316
BFAR	17.9602	18.1758	18.3687	16.6358	15.5452	16.0814
BFSP1	0.189718	0.267757	0.234417	0.520429	0.409296	0.227551
BGLAP	0	0	0	0	0.0488798	0.201415
BGN	0.0316997	0.0210965	0.0631046	0.0518884	0	0.0756697
BHLHA15	0.93147	0.884127	0.866344	0.80984	0.530755	0.62487
BHLHA9	0	0	0	0	0.0180271	0
BHLHE40	109.915	106.977	106.744	134.239	139.572	130.145
BHLHE40-AS1	0.274995	0.173862	0.346708	0.531156	0.427847	0.63768
BHLHE41	2.76135	2.8562	3.02005	5.14951	5.62328	5.3572
BICC1	1.94932	2.27076	1.72191	3.50794	3.57927	4.57285
BICD1	1.71896	1.60072	1.82219	3.04906	3.17927	3.8753
BICD2	10.6601	10.5656	11.1149	10.4396	10.8967	8.39947
BICDL1	0.455471	0.29531	0.425312	0.272087	0.456986	0.34587
BICDL2	0.0456142	0.0637494	0.0544826	0	0.00905978	0
BICRA	3.66636	4.09491	4.01425	4.10494	4.43347	3.92291
BICRAL	3.88663	3.63225	3.24945	4.27267	3.97045	4.94353
BID	23.1932	22.6954	25.8512	28.9994	28.4311	23.5935
BIK	6.99236	7.11097	6.54278	5.68423	5.72166	4.31349
BIN1	19.2272	19.7993	19.1975	21.0173	20.5503	14.7952
BIN3	6.07991	5.08116	5.04988	4.99088	4.95647	5.19877
BIN3-IT1	0.0406286	0	0.0134799	0	0	0.0138548
BIRC2	7.6134	8.9981	7.04509	12.6721	11.9488	20.7299
BIRC3	3.91329	5.24071	4.42722	9.74837	8.72811	17.9425
BIRC5	59.3281	60.3448	60.8719	48.4576	48.8581	47.2659
BIRC6	2.13576	2.14345	1.5909	3.02251	2.64715	4.45809
BIRC7	0	0.0186374	0.0371658	0.0916798	0.0927031	0
BISPR	0.011945	0	0.0594475	0.0117315	0.0237249	0.0488807
BIVM	1.67343	2.02291	1.32081	1.93884	1.73327	2.66828
BLACAT1	0.142181	0.0946232	0.117933	0.108608	0.141198	0.149497
BLCAP	25.0961	24.8411	25.4716	27.4639	27.6793	29.5184
BLID	0	0.0283816	0.0565972	0	0.0282342	0
BLK	0.0508866	0.00725693	0	0	0	0
BLM	1.75919	1.89423	1.9016	2.04189	1.71699	2.75043
BLMH	17.057	16.5964	18.1812	14.3877	15.0844	14.3796
BLNK	0	0.00572335	0	0	0	0
BLOC1S1	3.14641	2.96401	3.44055	2.69845	2.68456	1.85879
BLOC1S2	7.42515	9.59044	9.05869	7.60205	7.80224	10.2103
BLOC1S3	5.70849	5.38795	6.86287	4.96653	5.54348	5.37239
BLOC1S4	6.24722	5.95293	6.89985	6.13555	5.93862	5.17784
BLOC1S6	6.97078	7.11939	6.17429	6.14088	6.10491	9.27835
BLVRA	32.6905	38.5738	41.4047	30.8814	26.2724	23.4378
BLVRB	91.8288	82.646	85.1658	50.4816	59.434	44.1658
BLZF1	2.64231	4.15289	2.92531	3.65886	3.14475	5.65339
BMERB1	4.10927	4.90673	4.62121	3.7571	3.84413	3.12391
BMF	8.6815	8.30579	8.33146	10.7343	10.0866	9.73882
BMI1	0.42916	0.540789	0.378146	0.317844	0.41222	0.62618
BMP1	7.75854	7.42476	7.17132	8.84966	9.4546	7.45446
BMP2	0.028102	0	0	0	0	0
BMP2K	1.37538	1.36182	1.39966	2.17063	1.96119	2.93736
BMP3	0.028641	0.00408448	0.0244353	0.00401843	0.0203164	0.0376723
BMP4	0.0100022	0	0.0497783	0	0.00993301	0
BMP5	0	0	0.00226679	0	0	0
BMP6	0.144799	0.18397	0.0982674	0.116354	0.0718988	0.242401
BMP8A	0.0626504	0.0735787	0.0733637	0.0253361	0.0329386	0.0452425
BMP8B	0.342753	0.501303	0.400664	0.289655	0.336425	0.330261
BMPER	0.762955	0.810629	0.466304	0.753699	0.522844	0.698369
BMPR1A	5.42714	5.69234	5.34271	5.64044	5.9655	7.60569
BMPR1B	0.0151171	0.0188636	0.0112851	0.0408288	0.052544	0.104391
BMPR2	4.6382	5.33982	4.17364	9.55782	9.77296	15.6622
BMS1	8.68662	9.20778	8.35128	8.39795	8.15141	11.2489
BMT2	2.25665	2.44205	2.51042	3.41449	3.78531	5.76189
BNC1	3.88142	3.96091	3.84427	3.0534	3.62588	3.61743
BNC2	0	0.00957935	0	0	0	0.0019634
BNIP1	8.30179	8.99202	9.93591	8.5165	7.4767	7.16921
BNIP2	8.32928	8.9617	8.65408	8.41566	8.57199	13.0047
BNIP3	107.939	112.525	111.28	89.7508	89.3892	89.755
BNIP3L	45.2526	53.7925	49.6768	44.9663	44.7103	58.422
BNIPL	0.072085	0.179901	0.0538124	0.106195	0.143173	0.0829636
BOC	0.00569005	0.00852031	0.0169908	0.00279417	0.0141268	0.00291056
BOD1	25.0542	25.1381	24.6732	20.0964	19.1067	17.3123
BOD1L1	1.15592	1.81626	1.39906	1.88452	1.98821	4.21222
BOK	27.8786	23.6085	24.7811	29.5116	28.6192	23.4949
BOK-AS1	0.541421	0.150134	0.32933	0.295413	0.089613	0.707752
BOLA1	3.52603	3.07436	2.7544	3.13423	2.43786	2.55704
BOLA2	0	0	0	0	0.0729593	0
BOLA2-SMG1P6	1.53543	1.06208	1.39592	0.664937	0.792423	1.175
BOLA2B	0.398486	0.729293	0.59495	1.04363	0.923373	0.135888
BOLA3	27.7773	33.1497	37.832	25.0772	27.1842	23
BOLA3-DT	0.8916	1.19861	0.917037	0.957391	0.956272	1.23443
BOP1	34.0448	30.9754	33.8253	38.967	38.3324	27.7457
BORA	5.57953	6.10623	5.84978	3.89674	4.21113	5.74188
BORCS5	1.31098	1.47429	1.66682	1.24995	1.24173	0.998539
BORCS6	5.39887	4.73954	5.68432	5.94185	5.33461	4.88487
BORCS7	0.751545	0.781504	0.862337	1.04566	1.21282	1.56975
BORCS8	2.71319	2.14913	1.98141	2.63573	2.41621	2.4589
BPGM	7.00183	7.71656	7.85285	6.42606	6.73551	7.62229
BPHL	6.17596	6.37648	6.03695	6.87695	6.80363	8.18381
BPIFC	0	0.0107257	0	0	0	0
BPNT1	8.01837	8.60516	8.5084	11.2923	10.1193	9.17995
BPNT2	9.24298	8.79334	8.52743	9.61613	9.48037	11.7555
BPTF	3.49174	4.23916	3.39394	6.503	5.91499	9.70844
BRAP	3.77903	3.95907	3.66844	4.38838	3.6775	4.48752
BRAT1	8.86231	8.84049	9.16362	10.5276	10.2131	7.49892
BRCA1	3.89908	4.88626	3.91214	4.10291	4.26971	6.51757
BRCA2	0.362517	0.528276	0.346316	0.298744	0.355873	0.95701
BRCC3	2.37355	3.15176	2.46702	3.82996	3.4333	5.35896
BRD1	2.79529	2.73596	2.99963	4.06899	3.46575	3.28526
BRD2	50.2159	49.4882	50.1139	55.9083	55.8633	56.365
BRD3	8.92546	7.86109	8.19581	9.04213	8.99953	9.22697
BRD3OS	7.14024	6.51092	7.17685	8.26532	7.78299	7.09396
BRD4	7.49424	7.36474	7.83166	8.03641	8.43129	8.04217
BRD7	14.3347	15.3706	14.9783	14.4058	13.819	16.3817
BRD8	17.4365	18.1746	18.9361	19.5415	20.271	20.1171
BRD9	14.8359	15.1564	15.8903	13.4237	13.9504	11.5631
BRF1	6.36365	5.56234	5.69689	6.65912	6.9441	4.91368
BRF2	4.30979	4.57427	4.14451	2.9142	2.90808	2.05027
BRI3	22.5841	21.266	23.0814	18.034	19.949	17.2859
BRI3BP	3.18416	3.07706	3.10401	3.13046	3.10999	2.94854
BRICD5	1.17592	1.65548	1.41055	1.27335	1.07796	1.20301
BRINP1	0	0.00784051	0	0	0	0
BRINP3-DT	0	0	0.139365	0	0	0
BRIP1	0.781076	1.15821	0.888804	1.01536	0.969082	2.23824
BRIX1	19.99	26.2218	27.4072	19.9248	20.567	30.0592
BRK1	143.975	149.541	145.547	159.778	158.357	159.72
BRME1	0.109134	0.0862485	0.0814703	0.0669897	0.153538	0.0418681
BRMS1	34.483	32.4871	32.8876	35.9232	34.0742	25.8127
BRMS1L	2.15565	2.67838	2.54589	2.79693	2.75613	3.27761
BROX	6.17674	8.13626	7.34333	8.53286	8.07847	13.4339
BRPF1	6.69033	6.70824	7.10024	7.11709	7.02053	6.24008
BRPF3	7.2286	7.59569	7.70687	11.7481	11.0557	11.4409
BRPF3-AS1	0.185861	0.0412309	0.195275	0.0608462	0.0820338	0.0422538
BRSK1	5.5443	5.43221	5.00756	3.70936	3.67793	3.59378
BRSK2	2.84106	2.84023	3.04412	3.50294	3.46061	2.77648
BRWD1	0.980155	1.30496	1.15924	1.498	1.4481	3.21732
BRWD1-AS1	0	0.0359801	0	0	0	0
BRWD1-AS2	0.246832	0.246405	0.0245685	0.24242	0.294151	0.328273
BRWD3	1.44144	1.56664	1.17819	2.08882	2.18987	3.98251
BSCL2	0.312293	0.211546	0.310841	0.208125	0.431973	0.228205
BSDC1	14.501	14.453	14.05	15.8547	16.1775	15.3841
BSG	717.698	667.093	699.246	615.764	617.588	480.462
BSG-AS1	19.5261	16.8708	20.658	17.0556	17.7507	11.0929
BSN	0.0374259	0.0887326	0.121069	0.0413515	0.0325213	0.0542413
BSN-DT	0.0287038	0.0191028	0.152376	0.00939692	0.0380072	0
BSPRY	0.2116	0.348536	0.463357	0.218209	0.252165	0.248946
BST1	0.0235311	0.00939616	0.0140531	0	0.0233685	0.00481464
BST2	0.149283	0.298049	0.594356	0.122179	0	0
BSX	0	0.0263371	0	0	0	0
BTAF1	4.98679	6.36462	5.63775	5.88279	6.23509	9.7677
BTBD1	19.9461	21.7019	21.2582	21.2055	18.9797	26.4204
BTBD10	9.03436	10.2403	10.1545	7.78139	8.06045	9.4788
BTBD16	0.0939825	0.100521	0.0735001	0.158233	0.213332	0.226633
BTBD19	0.123656	0.151496	0.19581	0.430579	0.312584	0.281759
BTBD2	52.2373	48.8831	51.3953	52.6772	54.0837	42.6862
BTBD3	7.99012	8.43827	7.39364	6.92899	6.5233	8.22248
BTBD6	21.7487	20.4326	21.5246	27.0198	25.7819	23.4908
BTBD7	3.12261	3.61118	3.34917	4.78052	4.71232	5.93881
BTBD8	0.299703	0.511107	0.333113	0.409632	0.441487	0.815064
BTBD9	1.42761	1.64408	1.51822	2.26371	2.10879	2.01328
BTC	0.820289	0.88856	1.18128	1.62268	1.6119	2.76157
BTD	1.50672	1.88578	1.69599	2.51757	2.43505	2.28366
BTF3	401.023	440	443.221	372.653	354.58	337.058
BTF3L4	15.8673	17.3427	17.5709	12.0331	12.1947	14.4117
BTG1	23.6141	23.4927	24.4576	27.3083	25.7163	25.7543
BTG1-DT	0.0568832	0.0662489	0.00943647	0.102422	0.141225	0.0290968
BTG2	2.0899	1.70364	2.68879	1.83743	1.91231	1.41913
BTG2-DT	0	0.0090705	0	0	0.00902342	0
BTG3	17.9807	20.439	18.8878	14.9578	12.8077	17.3985
BTG3-AS1	0.112787	0.235419	0.255142	0.463223	0.285109	0.461539
BTK	0	0.00812758	0.00810382	0	0	0
BTLA	0	0.005828	0	0	0	0
BTN1A1	0	0	0	0	0	0.0346065
BTN2A1	10.657	11.971	10.4637	10.0206	10.9318	11.4656
BTN2A2	5.90163	6.48892	6.2257	6.33695	6.42552	6.96832
BTN3A1	4.90442	5.53557	5.16773	4.71089	5.26301	5.50137
BTN3A2	6.87253	6.66771	6.40177	7.42583	6.03336	6.59836
BTN3A3	1.05659	1.02128	1.38555	1.96834	2.1069	1.99028
BTNL8	0	0	0.0191278	0	0	0
BTNL9	0.0905799	0.0780927	0.11065	0.125354	0.118575	0.168484
BTRC	4.56421	4.24437	4.58932	4.39121	4.52606	5.35291
BUB1	33.6308	38.8531	37.4084	21.6644	22.0311	25.1946
BUB1B	16.8412	20.2611	17.202	13.9801	14.244	17.0971
BUB1B-PAK6	0.00642056	0	0.00639072	0	0	0
BUB3	16.0076	18.0681	17.1271	14.7784	15.1905	18.4403
BUD13	8.04817	8.65875	9.28979	7.68843	7.23694	8.32869
BUD23	69.0286	62.3093	65.2102	62.6358	61.824	51.199
BUD31	33.1569	37.4279	36.4428	27.7999	26.5595	25.9251
BYSL	17.4106	16.5411	17.7625	15.5047	19.6512	15.7798
BZW1	36.2897	42.2214	39.043	29.2748	29.4005	36.3749
BZW1-AS1	0	0	0.113065	0.0278907	0.028202	0.11621
BZW2	32.9655	35.6069	34.8669	31.3747	30.9073	31.2486
C10orf143	0	0.0761089	0.0252955	0.0499187	0.0630949	0.0129995
C10orf55	2.13986	2.34319	2.12053	2.6571	2.23741	2.43025
C10orf88	2.95821	3.29448	2.30621	2.36793	2.717	3.0176
C10orf95	0.254309	0.304643	0.168751	0.0333018	0.0841838	0.069378
C10orf95-AS1	5.02175	4.82565	4.87383	4.60933	5.4065	5.13742
C11orf1	2.04689	2.3224	2.35151	1.30183	1.42382	1.23613
C11orf24	12.9454	12.4674	12.8955	11.3183	10.9914	10.8135
C11orf49	13.9764	13.1386	12.2789	13.5128	13.734	12.9311
C11orf54	1.99651	2.4356	2.19357	2.81281	2.72702	3.60864
C11orf58	20.3091	23.6387	23.8514	19.4051	19.6024	22.3562
C11orf65	0.134782	0.239848	0.128323	0.08633	0.040737	0.125897
C11orf68	26.165	23.4138	22.8058	22.9569	20.3946	15.7083
C11orf71	3.00718	2.49413	2.50934	2.25393	2.72817	2.67166
C11orf80	11.232	11.4478	11.4676	10.6211	11.1225	11.3374
C11orf86	0.191908	0.298006	0.21224	0.125652	0.14823	0.0218143
C11orf91	0.898725	0.77552	0.758092	0.568493	0.408438	0.420755
C11orf94	1.04352	0.208343	0.900181	1.09319	1.38174	1.56575
C11orf96	0.360947	0.620555	0.319351	0.413578	0.19914	0.0820581
C11orf98	0.192766	0.230919	0.306992	0.151456	0.34458	0.31553
C12orf29	5.51985	5.82668	5.94985	4.70355	4.69485	7.41225
C12orf4	3.87794	4.71874	4.70495	3.52889	3.48669	4.84702
C12orf43	2.68577	2.75331	3.00745	3.29213	2.83134	2.76349
C12orf57	70.1164	69.4071	72.1634	72.1685	77.2634	53.1388
C12orf60	0.173967	0.168064	0.212259	0.203927	0.100315	0.149269
C12orf73	0.970969	1.10083	1.13213	1.0626	1.1089	1.08557
C12orf75	51.3115	57.4051	53.8337	40.3378	37.0338	39.647
C12orf75-AS1	0.045365	0.271719	0.180616	0.668311	0.450514	0.649739
C12orf76	2.14677	1.86292	2.08093	1.69499	2.1598	1.76559
C13orf42	0	0	0.00778079	0	0	0
C13orf46	0.690586	0.601007	0.784313	0.686937	0.650642	0.602331
C14orf119	18.0878	21.3402	20.212	20.2612	20.6327	22.5789
C14orf132	6.42007	5.40437	6.04474	7.90939	8.01638	7.40203
C14orf178	0.140708	0.0351162	0	0.276386	0	0
C14orf28	1.20971	1.1913	0.99256	0.987398	1.08771	1.29611
C14orf93	2.16055	2.47253	2.35152	1.7926	2.22508	1.8049
C15orf39	3.53459	3.21383	4.23524	3.79755	4.22001	3.04021
C15orf40	0.839183	0.803574	0.779716	0.992202	0.954991	0.88799
C15orf48	422.347	440.384	480.002	528.731	520.532	584.816
C15orf61	0.873143	0.741183	0.60895	0.740864	0.49549	0.717035
C15orf62	2.16788	2.55669	1.98718	7.04097	6.81915	6.35429
C15orf65	2.52497	1.37487	2.79883	2.31075	2.47902	2.67119
C16orf46	1.19168	0.907194	1.28855	1.3472	1.75389	1.23668
C16orf72	4.48884	4.43148	3.96678	4.16244	4.08557	4.85788
C16orf74	9.04904	9.68836	11.075	4.80612	5.3213	4.02742
C16orf86	0.335671	0.422505	0.290531	0.236503	0.456546	0.38073
C16orf87	1.3868	1.28719	1.48062	1.13116	1.20048	1.90655
C16orf89	0.0120142	0.0119934	0	0	0.0477244	0
C16orf91	7.57753	7.78132	6.78537	6.34844	6.68902	6.94631
C16orf95	1.71684	2.09226	3.41772	1.1387	1.54998	2.18978
C16orf95-DT	0.621081	1.67402	0.927292	0.548981	0.678467	0.127078
C16orf96	0.00526095	0	0	0	0.0208983	0.0107643
C17orf100	1.93144	2.16004	2.28382	2.15364	2.43727	2.16906
C17orf107	0.373464	0.256312	0.247818	0.298015	0.139081	0.230832
C17orf113	1.68126	1.55181	1.48087	1.6381	1.57688	1.41967
C17orf114	1.41948	0.12882	0.642217	1.26737	1.15336	0.726087
C17orf50	0	0	0	0	0	0.0979022
C17orf58	5.37326	6.68007	6.52822	5.97359	5.2371	5.40637
C17orf67	1.40605	1.50126	1.75243	1.46497	2.14913	1.57602
C17orf75	3.43916	4.55341	4.50391	2.62256	3.05425	3.15166
C17orf80	3.85888	4.58205	4.28877	4.48245	4.19309	4.8639
C17orf97	1.78572	1.33697	1.21188	1.22234	1.38377	1.2871
C17orf99	0	0	0	0	0.0215916	0.0444855
C18orf21	6.19311	7.68156	7.61943	6.16073	6.03152	7.38267
C18orf25	5.94695	6.26426	5.55735	5.74048	4.91053	5.76182
C18orf32	0.520732	0.358504	0.388734	0.255712	0.334353	0.50058
C18orf54	1.76588	1.9936	1.83118	2.16317	1.85571	3.67553
C19orf12	3.72794	3.94682	3.83997	3.97369	3.73953	3.97476
C19orf18	0.299409	0.29889	0.189647	0.347522	0.351401	0.250614
C19orf25	12.9743	11.1837	10.448	13.4147	13.6831	10.5718
C19orf33	167.55	172.887	170.035	135.689	134.69	94.2666
C19orf38	0.0154884	0	0	0.0152116	0.0615254	0
C19orf44	1.37787	1.46756	1.23948	1.50045	1.6088	1.49807
C19orf47	1.85599	1.5878	1.62684	1.49643	1.20386	1.37274
C19orf53	30.264	31.5975	31.8368	27.4325	32.4813	23.4339
C19orf54	3.78197	4.14174	4.33582	4.47003	3.77934	3.65111
C19orf67	0	0.035581	0	0	0	0
C19orf71	1.67737	1.38326	1.5244	1.18182	1.1588	1.00722
C19orf73	0.570608	0.670142	1.03568	0.923025	0.766662	0.343383
C19orf81	0.0327271	0.0326705	0.0977251	0.128569	0.0325009	0.033481
C19orf84	0.0186557	0	0	0	0	0
C1D	5.04304	4.19171	4.71119	5.22573	4.41399	5.82597
C1GALT1	2.51921	3.48755	2.85739	2.85576	2.98256	4.88004
C1GALT1C1	13.6511	14.6313	16.7412	14.4082	14.6375	15.6707
C1GALT1C1L	3.01824	2.15771	3.41123	2.02719	2.41724	2.19132
C1QBP	155.845	147.855	157.262	149.586	137.038	107.474
C1QL1	10.3732	8.53164	9.30219	10.5081	10.9169	8.10925
C1QL3	0	0.0209278	0	0	0	0
C1QL4	5.62765	5.52229	4.82682	4.29229	4.48289	3.31963
C1QTNF1	9.90495	9.49852	10.7646	10.0547	9.56798	6.95222
C1QTNF1-AS1	0.0257819	0	0	0	0.102415	0
C1QTNF12	0.209289	0.132953	0.113627	0.0560585	0.245631	0.194645
C1QTNF2	0	0.0175457	0	0.0345239	0.0872731	0
C1QTNF3	0.0330047	0.0461266	0.111694	0.0518636	0.0917744	0.175578
C1QTNF3-AMACR	0	0.00688324	0.00686312	0	0.02739	0.014108
C1QTNF4	0.0182323	0.0182008	0.00907379	0.00895321	0.0181063	0
C1QTNF6	0.16267	0.218385	0.111665	0.190062	0.147619	0.255364
C1QTNF8	0.0785208	0.0498813	0	0.0280426	0.0283556	0.0876322
C1R	8.08541	8.64318	8.33288	9.33781	8.7026	8.07634
C1RL	14.3807	14.8362	13.437	22.7829	23.6295	23.413
C1RL-AS1	3.91154	4.12642	3.90746	4.40766	4.48969	4.8039
C1S	4.99639	4.89428	4.99011	6.34493	6.07764	5.72974
C1orf100	0	0.0217011	0	0	0	0
C1orf105	0	0.00652724	0	0.019265	0	0
C1orf109	6.61717	5.46216	5.71448	4.9966	5.06575	5.12201
C1orf112	2.56398	2.75507	2.96855	2.11595	1.77708	2.37713
C1orf115	17.9877	17.5782	16.4807	13.9688	13.1408	12.8233
C1orf116	0.00452249	0.0180587	0.0360118	0	0.0449123	0
C1orf122	16.9222	12.7959	16.2093	18.589	19.6153	15.5865
C1orf127	0	0	0.0335221	0.00826916	0	0.00861361
C1orf131	5.29457	6.58937	6.10205	5.4565	6.01899	6.32522
C1orf159	5.60166	5.45906	5.70813	6.68833	6.02058	4.89257
C1orf162	0.229031	0.356808	0.303955	0.303324	0.337725	0.450862
C1orf167	0.00747123	0.0186458	0.00371825	0.00366884	0	0
C1orf174	5.73709	6.11672	6.08725	5.46865	5.25204	5.36276
C1orf198	9.47081	10.3884	10.5523	8.39392	7.72378	8.27967
C1orf21	0.154857	0.178743	0.166179	0.0570333	0.028835	0.0297045
C1orf21-DT	0	0.0261158	0	0	0	0
C1orf210	0.0148158	0	0.0884816	0	0	0
C1orf216	12.4978	13.1552	12.6925	17.5624	17.734	16.5752
C1orf220	0.318928	0.115773	0.269348	0.104409	0.153563	0.276839
C1orf226	0.958565	0.864674	0.844904	1.01516	1.11824	1.27602
C1orf35	17.3372	16.8639	18.1214	13.3488	14.7632	14.6159
C1orf43	68.5609	71.9604	73.6164	68.7527	66.8781	63.4616
C1orf50	2.93004	2.91452	2.42688	3.10891	3.47616	2.88513
C1orf52	3.60566	3.68694	3.36528	3.2183	3.40115	4.60809
C1orf53	2.44903	2.77628	1.61132	2.11988	1.23666	0.509581
C1orf54	0.119164	0	0.177916	0.175551	0.118341	0.152387
C1orf56	1.95898	1.74095	2.00932	2.08821	1.7675	1.35644
C1orf74	1.57387	1.6083	1.92114	1.22719	1.03495	1.03896
C2	0.0538785	0.141186	0.013407	0.0264577	0.0200648	0.0551196
C20orf141	0.0331629	0	0	0	0	0
C20orf144	0.0477114	0	0.189959	0.421727	0.331671	0
C20orf202	0.0207027	0	0.0103032	0	0	0
C20orf203	0.00433589	0	0	0	0	0
C20orf204	0.444904	0.545915	0.350579	0.118341	0.165686	0.0663764
C20orf27	47.3216	40.8322	42.2996	40.2954	43.8421	36.0512
C20orf85	0	0	0	0.0303853	0	0
C20orf96	14.5164	15.4782	15.0893	12.7927	11.6263	12.4586
C21orf58	2.3445	2.11617	2.21097	2.25633	2.41826	1.93883
C21orf62-AS1	0.248433	0.0620006	0	0.203326	0.185036	0.232976
C21orf91	1.59697	1.64028	1.67224	1.9356	2.00304	3.59804
C21orf91-OT1	0	0	0	0.0492156	0	0
C22orf15	0	0	0	0	0	0.0367133
C22orf23	0.43413	0.273713	0.352513	0.460031	0.465166	0.222065
C22orf39	6.52761	6.71682	6.2707	6.02299	6.90801	5.6643
C2CD2	3.003	2.79355	2.93891	2.65253	2.64463	2.86607
C2CD2L	1.47557	1.38352	1.57282	1.64364	1.72876	1.54778
C2CD3	4.25228	3.883	3.72792	4.4901	4.39986	4.96002
C2CD4A	0.0722942	0.0288676	0.0215875	0.0284008	0.100512	0.00739595
C2CD4C	6.15224	5.75774	6.83328	6.82902	7.49394	5.93337
C2CD4D	0	0	0	0	0.011891	0
C2CD4D-AS1	0	0.0319703	0	0.0209689	0	0
C2CD5	5.7537	6.43222	5.55414	7.195	8.38649	11.3235
C2CD6	0.00636315	0.0222325	0.0411682	0.0156235	0	0.0162743
C2orf15	1.22865	1.61612	1.62578	1.94489	1.57902	2.01112
C2orf27A	0.387446	0.499766	0.610965	0.654153	0.639838	0.685855
C2orf42	2.40559	2.34889	1.57133	2.32567	2.41136	2.24566
C2orf49	2.21775	2.42912	2.30092	2.02088	2.39319	2.94577
C2orf49-DT	0.359598	0.405432	0.336872	0.357325	0.378119	0.679499
C2orf50	0.0215205	0.0429665	0.0397809	0.0634074	0.0702214	0.0471776
C2orf66	0.112102	0	0	0.0366994	0.0185545	0.0191141
C2orf68	6.49235	6.38945	6.4568	7.4903	6.49039	7.3492
C2orf69	4.23749	4.56695	3.27752	3.62496	3.47109	5.17727
C2orf72	0.199023	0.130169	0.21176	0.101103	0.109047	0.0210629
C2orf73	0.00837436	0.00835987	0.00833544	0	0	0.00856727
C2orf74	3.15823	4.35218	4.10028	3.99522	4.00572	5.05718
C2orf74-DT	6.74987	5.29915	6.05925	6.04569	5.76495	5.54022
C2orf76	0.859379	0.846822	1.05405	1.11084	1.10672	1.50311
C2orf78	0.00782941	0	0	0	0	0
C2orf81	3.56796	2.83939	2.581	2.18148	2.80469	2.33404
C2orf88	0.2483	0.451478	0.238319	0.239507	0.184938	0.312988
C2orf92	0.228179	0.28684	0.151413	0.307101	0.369277	0.423642
C3	218.706	219.986	228.234	429.734	428.512	374.899
C3AR1	0	0.0142436	0.035505	0	0	0
C3orf14	4.53262	4.48277	4.76884	2.71583	3.0327	2.39846
C3orf18	5.00538	5.01404	5.82878	4.30781	4.33291	3.73543
C3orf20	0.110545	0.134877	0.0774293	0.124653	0.142308	0.23456
C3orf33	1.02268	1.16354	1.24247	0.901009	0.791582	0.953926
C3orf38	7.84802	8.88452	8.92015	6.17835	6.96421	7.8811
C3orf52	4.19728	3.48983	5.0643	4.87673	4.25672	4.61288
C3orf62	3.10985	3.20397	2.60595	3.85698	3.86044	4.02444
C3orf70	0.00347889	0	0.00346272	0	0	0.00355902
C3orf80	0.205166	0.365098	0.399546	0.236542	0.221465	0.310275
C4A	0.0642482	0.11453	0.0593817	0.0270428	0.0546892	0.0516436
C4B	0.0229458	0.0229061	0.164442	0.036057	0.0227872	0.0328641
C4orf19	0.0398718	0.00361843	0.0613336	0.00711983	0.0143986	0.018541
C4orf3	29.1881	30.1203	31.8245	31.5586	30.6575	34.9562
C4orf33	0.850503	1.07377	0.949256	1.18232	0.717309	1.24436
C4orf36	0.0229437	0.160328	0.171278	0.0901342	0.0683552	0.328611
C4orf45	0	0	0	0	0.0105607	0
C4orf46	5.64551	6.44823	5.49407	3.91683	4.05607	5.35166
C4orf47	0.656795	0.791311	0.864142	0.682127	0.562288	0.911345
C4orf48	8.82463	8.02008	8.79631	9.71894	9.23221	8.45388
C4orf54	0	0	0	0.00225232	0.00683237	0.0140768
C5	0.192384	0.229626	0.249769	0.238235	0.170287	0.286666
C5AR1	0.180705	0.212226	0.116383	0.0208794	0.0422248	0.0978709
C5AR2	0.00328307	0.0163869	0.00326781	0.00322438	0	0.00335869
C5orf15	34.7855	36.0434	36.21	41.2179	44.8883	53.9858
C5orf22	13.8392	13.259	12.7486	10.2269	10.9961	14.3152
C5orf24	9.36147	10.4231	9.32648	12.3416	11.7007	15.8932
C5orf34	2.33891	2.45831	2.15143	1.75847	1.32423	1.94723
C5orf34-AS1	0.298373	0.245294	0.262046	0.293039	0.40089	0.646403
C5orf38	1.09321	0.957803	1.50486	1.46772	1.42059	1.18383
C5orf49	0.28366	0.0339803	0.316223	0.0557179	0.0901438	0.0232155
C5orf63	0.461424	0.506688	0.451625	0.649552	0.500239	0.924437
C6	0.0220304	0	0	0	0.0218781	0
C6orf118	0	0	0.0142387	0	0	0
C6orf120	7.7039	8.97624	8.58124	8.26506	8.57924	10.2698
C6orf132	1.98541	1.37453	2.01889	0.915581	1.02651	0.694339
C6orf136	5.54482	5.36348	5.29512	5.53668	6.71555	5.36116
C6orf141	0.498963	0.498099	0.603067	0.119011	0.198205	0.269813
C6orf15	0	0	0.0214443	0	0	0
C6orf163	0.148246	0.406971	0.147557	0.436789	0.27604	0.511856
C6orf223	0.00470534	0.0704579	0.00468347	0.0138637	0.0186912	0.0288824
C6orf226	7.95898	6.96322	9.88023	6.19189	6.79386	5.85515
C6orf47	7.4686	8.09702	8.46303	8.08438	7.66619	6.11045
C6orf52	0.140093	0.699251	0.418324	0.122301	0.324623	0.111471
C6orf58	0.393351	0.351337	0.309097	0.325322	0.226156	0.465951
C6orf62	27.3423	30.1916	29.6692	30.5647	31.518	36.601
C6orf89	13.486	13.1901	13.3707	13.9311	14.2382	12.7996
C7	0.00435713	0	0	0.00427925	0.0216351	0
C7orf25	4.01546	4.23501	4.33293	3.2959	3.10213	3.46558
C7orf26	8.16981	7.88574	7.61278	7.97635	7.48038	8.88161
C7orf31	1.75064	1.99162	2.23567	2.09566	1.76478	1.95317
C7orf50	21.5117	19.708	20.1223	11.4602	12.3666	8.80674
C7orf57	0.645217	0.480147	0.31527	0.195866	0.104851	0.0960115
C7orf61	0.0252079	0.0503284	0.0250907	0	0	0
C8G	0.0848083	0.169323	0.14069	0.0832923	0.112296	0.0867618
C8orf33	8.1465	7.39905	7.3269	7.75745	7.69873	6.44003
C8orf34	0.0106597	0.0319238	0.00424407	0.00418767	0.00211721	0.0130863
C8orf44	0.656734	0.938008	0.734134	0.66484	0.772599	1.11632
C8orf44-SGK3	0.00551125	0	0	0	0	0
C8orf48	1.52589	1.4182	2.3393	1.24023	1.84628	1.52515
C8orf58	14.7785	12.3707	14.975	17.4053	17.7559	14.0284
C8orf76	1.23576	0.417534	0.832628	0.5975	0.660811	0.894684
C8orf82	9.31288	10.7348	9.32008	14.2875	15.5149	10.5237
[truncated: 18,331 more rows]
