# Supplementary material for: Peptide-based Self-adaptive Implant Coating Sequentially Regulates Bone Regeneration to Enhance Interfacial Osseointegration
Source: Research Square preprint supplement (doi:10.21203/rs.3.rs-5132912/v1), 2024-10-01
Supplement: Supplementary file 565 [file gene_stat.xls]

Sample	gene_num
C1	17412
C2	17364
C3	17576
S1	17440
S2	17521
S3	17382
Total	20383
