# Supplementary material for: Peptide-based Self-adaptive Implant Coating Sequentially Regulates Bone Regeneration to Enhance Interfacial Osseointegration
Source: Research Square preprint supplement (doi:10.21203/rs.3.rs-5132912/v1), 2024-10-01
Supplement: Supplementary file 569 [file heatmap-coefficient_matrix.xls]

C1	C2	C3	S1	S2	S3
C1	1	0.999565489351585	0.987348914383184	0.976266505384275	0.968733554663956	0.96436175159443
C2	0.999565489351585	1	0.987077280009147	0.975188100137152	0.966947210531473	0.962830847552916
C3	0.987348914383184	0.987077280009147	1	0.940518988676339	0.928021060663344	0.92040235882192
S1	0.976266505384275	0.975188100137152	0.940518988676339	1	0.997720279551963	0.996881969172775
S2	0.968733554663956	0.966947210531473	0.928021060663344	0.997720279551963	1	0.999312697270093
S3	0.96436175159443	0.962830847552916	0.92040235882192	0.996881969172775	0.999312697270093	1
