# Supplementary material for: Peptide-based Self-adaptive Implant Coating Sequentially Regulates Bone Regeneration to Enhance Interfacial Osseointegration
Source: Research Square preprint supplement (doi:10.21203/rs.3.rs-5132912/v1), 2024-10-01
Supplement: Supplementary file 573 [file report.FPKM.xls]

sample	Min	1st_Qu	Median	Mean	3rd_Qu	Max	Sd	Sum
C1	0	0.0451165610776307	1.40731386906567	20.8570410543105	8.8992784221542	13171.5896454937	205.063058092738	425129.067810011
C2	0	0.042134915841761	1.39696257333232	20.9076701041755	8.85208219951103	13313.7273205036	207.587753103232	426161.039733408
C3	0	0.0508738504861825	1.56130851713997	20.559854450211	9.11747837955231	16501.1525555704	229.803184734094	419071.51325865
S1	0	0.045807247187947	1.3368597669687	21.1794176290366	8.7192703808524	10577.6045458879	191.132305343381	431700.069532652
S2	0	0.0470104713746238	1.40364481148817	20.9281440577601	8.83829138451149	9170.82691889778	178.866602378981	426578.360329325
S3	0	0.0461416460692333	1.34349198159026	21.1474454314203	8.72715881702413	8971.5135276328	180.599856756801	431048.38022864
