# Supplementary material for: Peptide-based Self-adaptive Implant Coating Sequentially Regulates Bone Regeneration to Enhance Interfacial Osseointegration
Source: Research Square preprint supplement (doi:10.21203/rs.3.rs-5132912/v1), 2024-10-01
Supplement: Supplementary file 577 [file 0-DEG-fpkm.xlsx]

## Sheet: Sheet1
gene_id	S1	S2	S3	C1	C2	C3
ABCA12	0.267489	0.253937	0.276687	0.844786	0.588576	1.09192
ACBD7	2.66051	3.43055	4.03842	1.61132	1.67334	1.65576
ACHE	0.808431	0.622972	0.96702	0.250731	0.288742	0.609408
ACP7	0.616416	0.53978	0.462854	0.244283	0.268489	0.154888
ACTR3C	0.0700466	0.0784298	0.0659523	0.195228	0.155105	0.16753
ADAM8	13.8159	14.8478	14.2225	7.20062	7.71811	5.84721
ADAMTS5	0.0324354	0.0996283	0.0720195	0.267097	0.282467	0.339483
ADAMTS7	1.31721	1.61226	1.4447	4.80799	5.06162	3.71221
ADAMTSL4	3.33292	3.0438	3.42224	1.41186	1.66403	1.40509
ADAT3	1.04356	0.995112	0.961198	2.53933	3.04718	2.64511
ADGRA2	1.36015	1.04582	1.44574	0.44993	0.722987	0.508636
ADGRF1	0.0451928	0.131243	0.155395	0.41964	0.444724	0.596837
ADGRF5	0.02389	0.0158991	0.047558	0.117315	0.118624	0.171082
ADM2	2.74854	2.43054	2.41187	0.810393	0.732878	0.677698
AGL	3.09369	3.11426	2.67865	4.96728	5.06463	8.28933
AHI1	0.65168	1.06783	0.760035	1.54836	1.64409	2.79472
AKAP5	0.214999	0.180133	0.0878928	0.505266	0.522344	0.608795
AKR1B1	193.844	186.326	188.536	818.179	832.583	752.32
ALDH1L1	0.833315	0.610487	0.608703	0.237606	0.160172	0.220003
ALDH1L2	2.72478	2.66251	2.28929	0.774811	0.717166	0.980919
ALDH3B1	0.783293	0.823977	0.754502	0.215071	0.326207	0.275729
ALOX5AP	12.8328	13.9214	13.4377	4.86289	5.70908	5.78638
ALOXE3	0.187763	0.147272	0.300359	0.0461016	0	0.0137205
ALPK3	0.287051	0.233129	0.196128	0.98911	0.985656	0.686874
ANK1	0.0260407	0.0519913	0.0933109	0.145779	0.206886	0.125211
ANKRD1	0.973953	0.972267	1.2741	0.341623	0.497427	0.740174
ANKRD2	0	0	0	0.178305	0.0655618	0.0844236
ANKRD24	0.226042	0.270781	0.188993	0.115441	0.022448	0.0924997
ANKRD34B	0.00612226	0.0122233	0	0.036077	0.0790392	0.0688962
APC	0.53787	0.92171	0.795469	1.47997	1.36025	3.33721
APLN	2.35612	2.25179	1.8992	1.22908	0.974292	0.979964
ARHGAP29	15.0446	18.1321	15.7622	28.053	28.3715	44.3243
ARHGAP42	0.12948	0.118997	0.173883	0.294701	0.206144	0.380567
ARID4B	1.44677	2.43832	2.27319	3.77019	3.30349	7.25284
ARL15	2.35256	2.54821	2.46523	4.82428	5.32346	7.91898
ARL4C	54.0263	56.8183	57.6584	138.692	132.896	135.239
ARMH1	0.0127524	0.0509212	0.0253862	0.0939331	0.12031	0.143507
ARNT2	0.362718	0.312541	0.364832	0.149993	0.144084	0.132805
ARRDC4	1.16495	0.942587	0.872701	0.126456	0.292268	0.200721
ARSG	0.205734	0.121491	0.126904	0.00853758	0.0316539	0.0770745
ASH1L	3.09094	3.48849	2.58536	5.48858	5.40896	8.0372
ASNS	1.07849	1.15352	1.43386	0.348026	0.351911	0.228547
ATF3	5.97868	4.77119	5.29352	1.97149	2.14021	2.12474
ATF4	88.5987	90.2239	94.1593	44.3586	46.1552	44.0039
ATM	2.07868	2.71891	1.92744	3.99732	4.00983	8.31608
ATP2A1-AS1	3.83815	4.38495	4.75417	1.75912	1.567	1.43974
ATP6V0E2-AS1	0.88455	0.656188	0.452335	0.199252	0.346539	0.28227
ATRX	1.53724	2.64419	2.30476	4.17875	3.74713	10.8348
AVPR2	0.206362	0.0772519	0.0641885	0	0	0
B3GNT3	1.60417	1.31187	1.38923	0.667581	0.513025	0.667574
BAZ1A	3.34245	4.17897	3.55412	6.31721	6.45249	10.3
BAZ2B	0.619688	0.607725	0.484324	1.45295	1.13113	2.94212
BCL2A1	0.327702	0.535312	0.207568	0	0	0
BCL2L15	0.0049761	0.0198699	0	0.0830815	0.0395336	0.0865422
BEGAIN	0.220295	0.0602502	0.126156	0.0503845	0.0299687	0.0463087
BIRC3	3.91329	5.24071	4.42722	9.74837	8.72811	17.9425
BMPR1B	0.0151171	0.0188636	0.0112851	0.0408288	0.052544	0.104391
BMPR2	4.6382	5.33982	4.17364	9.55782	9.77296	15.6622
BTBD19	0.123656	0.151496	0.19581	0.430579	0.312584	0.281759
BTC	0.820289	0.88856	1.18128	1.62268	1.6119	2.76157
C15orf62	2.16788	2.55669	1.98718	7.04097	6.81915	6.35429
C16orf74	9.04904	9.68836	11.075	4.80612	5.3213	4.02742
C1orf21	0.154857	0.178743	0.166179	0.0570333	0.028835	0.0297045
C20orf204	0.444904	0.545915	0.350579	0.118341	0.165686	0.0663764
C6orf132	1.98541	1.37453	2.01889	0.915581	1.02651	0.694339
C6orf141	0.498963	0.498099	0.603067	0.119011	0.198205	0.269813
C7orf57	0.645217	0.480147	0.31527	0.195866	0.104851	0.0960115
CA9	1.77205	1.62425	2.24485	0.854366	0.431951	1.05476
CACNB4	0.111091	0.133078	0.106889	0.195177	0.170388	0.406614
CARS1	50.4137	50.1635	51.1325	22.9275	21.8238	20.6459
CCDC146	0.306183	0.193829	0.178396	0.564748	0.311483	0.855668
CCDC183-AS1	0.574097	0.521003	0.488311	2.14257	2.22868	1.91146
CCDC198	0.245979	0.184165	0.263198	0.646232	0.500771	1.01916
CCDC74B	1.87734	2.01668	2.42717	0.961973	1.0639	0.835037
CCDC92	0.550707	0.482962	0.624991	1.65797	1.34425	1.41638
CCL2	6.25155	6.84467	6.92503	15.3495	15.8212	15.4043
CCL20	47.6905	60.516	59.7447	26.8358	22.598	30.0311
CCND2	0.786324	0.746672	0.881934	0.173289	0.179033	0.125571
CD22	0.106498	0.113908	0.204435	0	0.0302177	0
CD274	0.571011	0.32478	0.356875	0.0391258	0.191219	0.196985
CD2AP	4.48186	6.07867	4.83348	8.91207	8.23455	16.1653
CD68	12.7521	10.3678	11.5588	4.4473	3.67009	2.92897
CDC20-DT	2.27199	2.11686	2.28297	0.701291	1.20335	1.23964
CDC42BPA	3.63221	4.33429	3.55664	6.92363	7.21002	11.083
CDC42EP5	2.58504	2.21984	2.49003	1.14657	1.07656	0.824657
CDH16	0	0	0.0430674	0.161481	0.335161	0.265591
CDH3	0.327054	0.465133	0.258643	0.140803	0.0845351	0.110001
CDH5	0.0664949	0.0422417	0.0962703	0.225604	0.240128	0.129869
CDH6	0	0.0222669	0.00493374	0.124139	0.0443027	0.0963483
CDK18	0.829008	1.03797	0.636348	0.303596	0.411639	0.237182
CDK6	3.39185	3.69004	2.90587	6.42843	6.63187	11.5737
CDKN1C	2.22094	1.60195	1.85283	0.668242	0.81594	0.801146
CEP162	0.486238	0.726184	0.560195	0.834767	0.882106	1.84092
CEP350	0.894803	1.20553	0.964864	1.84693	2.09331	4.18077
CEP83-DT	0.397632	0.532486	0.511623	0.24765	0.231151	0.208357
CFAP44	0.36629	0.495405	0.34577	0.78215	0.570279	1.32001
CGNL1	0.0282342	0.0366409	0.0112412	0	0	0
CHAC1	2.87511	2.69842	3.2001	0.390172	0.528748	0.201117
CHD5	0.333757	0.348324	0.369956	0.126647	0.125549	0.0853613
CHD9	0.882065	1.26038	1.0023	1.54763	1.63552	3.98307
CHIC1	0.437852	0.543361	0.445813	0.690408	0.789867	1.62532
CHRNA3	0.142123	0.0743165	0.121253	0.00664679	0.0268839	0.0138473
CITED4	58.9173	58.5876	62.0686	127.324	126.536	110.28
CKLF	0.98163	0.615957	0.949151	1.81799	1.39263	2.3241
CLDN1	88.2962	93.8287	89.2454	169.844	172.185	218.938
CLDN2	0.138688	0.211315	0.239759	0.638029	0.405938	0.268829
CLDN4	1.29302	0.748068	1.21389	3.04489	3.61878	2.87109
CLOCK	0.623044	0.67516	0.556909	0.948053	0.881293	1.92057
CMTM1	1.37329	1.09208	1.01939	2.58318	2.2884	3.88139
CNTNAP3C	3.26572	1.27186	1.90951	1.02597	1.04711	0.823999
COBLL1	0.131357	0.193119	0.154519	0.30024	0.272758	0.510656
COL13A1	2.16285	2.00747	2.3976	0.88804	0.912319	0.732625
COL17A1	1.98817	1.59044	2.17329	0.937088	1.00484	0.794518
COL7A1	18.5534	18.3488	19.5787	39.1801	41.0724	33.8814
CORO1A	5.03543	5.78358	4.71301	2.58511	2.31563	1.74153
CORO2B	0.502313	0.536428	0.48835	0.172093	0.272622	0.0956062
CP	0.532342	0.728413	0.676038	4.37642	4.18372	5.84981
CPA4	1.44612	1.41688	1.27058	0.473423	0.80671	0.675789
CPED1	0.190419	0.236715	0.196686	0.0352859	0.139151	0.051458
CPLANE1	0.877792	1.16305	0.927723	1.64426	1.62933	2.93405
CPO	0	0.00211513	0	0.0145664	0.0178852	0.0119218
CREBRF	0.640856	0.867639	0.626926	1.36955	1.36845	2.73221
CSF2RA	0.145971	0.20123	0.0276747	0	0	0.0284444
CXCL6	13.8705	11.2099	14.2738	26.1471	29.5447	32.1265
CYB5R2	0.63568	0.71035	0.746049	0.158409	0.169599	0.174714
CYP27C1	1.58327	1.28837	1.34669	3.47748	3.34954	4.11317
CYP3A5	0.134945	0.261499	0.102714	0.405396	0.342914	0.418222
CYYR1	2.30061	2.07771	2.26932	5.14887	4.93102	5.86285
DACT3	0.433086	0.288225	0.465559	0.181481	0.080284	0.11815
DARS1-AS1	1.48194	1.03777	1.73923	3.56258	3.44859	3.19054
DDIT3	23.8271	28.9567	27.7357	10.652	8.14642	11.139
DDN	0.796449	0.755969	0.90971	0.359048	0.460303	0.34729
DGKH	0.543318	0.615444	0.559006	1.00915	1.07214	1.89502
DHRSX	0.502163	0.0192805	0.41332	0	0.0959023	0.0197589
DKKL1	1.0787	1.88446	1.27895	0.607609	0.834942	0.486861
DLL1	0.519821	0.361274	0.334021	0.155098	0.189501	0.181753
DMBX1	0.284	0.21143	0.24435	0.11346	0.0621437	0.04432
DMC1	0.324031	0.278543	0.223975	0.10608	0.0804477	0.119706
DNAH17	0.171363	0.12785	0.118499	0.428722	0.338566	0.350621
DNAJB14	0.997767	1.75179	1.59983	2.48224	2.20151	5.27057
DNAJC13	3.94635	4.4964	3.29978	6.5056	5.97357	11.3389
DNHD1	0.0793923	0.133148	0.210202	0.279144	0.268068	0.423974
DOCK2	0.0645408	0.0773149	0.0844307	0.150318	0.18679	0.233926
DOK3	0.725457	0.634424	0.674344	1.40731	1.72668	1.60701
DST	0.9482	1.40364	0.957003	2.02688	1.68412	3.92014
DTX4	0.731302	0.775151	0.854673	0.30666	0.285603	0.290012
DUS4L-BCAP29	0.155976	0.282443	0.187745	0.505876	0.313398	0.667962
DUSP15	1.0473	1.14111	1.29669	0.119165	0.0443929	0.104529
DYNC1LI2-DT	0.0429847	0.163059	0.017114	0.329288	0.17075	0.378184
ECM1	2.87235	2.73916	2.3825	0.573375	0.614561	0.465862
EFCAB2	0.148172	0.0819772	0.0710762	0.310333	0.288976	0.368918
EFNA1	188.507	188.565	180.986	509.503	531.222	478.849
EIF4E3	0.0509028	0.0900806	0.0552722	0.011362	0.00689331	0.0213036
EIF4EBP1	103.838	101.583	115.375	45.4598	43.7242	35.2455
ELAPOR1	0.286268	0.27374	0.23095	0.514951	0.634415	0.508656
ENDOD1	3.77516	3.37306	3.22995	1.93536	1.48899	1.02442
EOMES	0.0886069	0.0952577	0.183174	0.0200822	0.0270752	0.0348646
EP300-AS1	4.12077	3.57237	3.63389	1.40229	1.56153	1.92295
EPHA3	0.302939	0.143647	0.248763	0.676867	0.530239	0.844524
ERBB4	0.0495255	0.0454846	0.041408	0.169268	0.121974	0.261438
ERCC6L2	0.454562	0.602026	0.470444	1.00448	0.959267	1.73331
ERFE	10.957	11.7417	11.4628	5.18499	4.79684	4.39533
ERVK13-1	0.230052	0.325094	0.208166	0.575119	0.554835	0.629641
ESCO1	1.10024	1.56079	1.38855	1.74752	2.22709	4.79314
ETNK1	2.00279	2.3031	2.0837	3.5143	3.6071	7.34344
EXPH5	0.133683	0.13528	0.0765561	0.255393	0.15822	0.286639
EYS	0	0.00356499	0	0.0280587	0.0248254	0.0109603
F3	19.1288	18.7278	20.0215	9.49455	9.60053	8.84782
FA2H	0.369466	0.413533	0.339889	0.175933	0.172337	0.0859038
FAM107B	3.18176	3.69522	3.24842	1.41826	1.59662	1.66939
FAM135A	1.43541	1.68602	1.43616	2.53756	2.40667	4.70295
FAM167A	3.75324	3.53318	3.49508	1.36118	1.1362	1.56062
FAM214A	0.62086	0.832283	0.728327	1.45907	1.44013	2.31834
FAM225B	0.424669	0.0642325	0.085393	0.0631937	0.0170397	0.0087768
FAM27E3	1.61959	1.69928	2.2865	0.827783	0.771374	0.794635
FAM72C	0.785766	0.647987	0.629091	0.369084	0.169638	0.270868
FAM86B2	1.05833	0.651671	1.29953	0.514849	0.510773	0.404751
FAR2	0.294687	0.380699	0.496051	0.868257	1.01997	1.30344
FAXDC2	0	0	0	0.0287541	0.00484585	0.0798716
FBXL19-AS1	0.434946	0.377559	0.370181	1.07102	0.907698	1.16723
FER	0.669081	0.797247	0.577984	1.24838	1.20934	2.22032
FGF1	0.306465	0.32633	0.10168	0.110362	0.0760865	0.0627048
FGF18	0.0249303	0.0622178	0.0868504	0.416239	0.297095	0.586605
FIGN	0.467888	0.686293	0.47689	1.38715	1.34935	2.17633
FLJ46906	3.11006	2.95565	3.02131	1.51502	1.68018	0.941783
FMNL1	5.06731	4.69129	4.30747	2.1018	2.25883	1.99106
FMNL1-AS1	0.125531	0.200502	0.124948	0.419176	0.423855	0.667798
FNDC5	0.454754	0.378306	0.41492	0.1191	0.203225	0.147323
FOSL1	109.85	99.1569	107.533	48.7766	45.5428	37.6647
FOXF2	0.264194	0.131868	0.32365	0.0399187	0.0201821	0.0935583
FRK	0.0332048	0.026169	0.020874	0.0514915	0.0676861	0.126939
FRMD4A	2.41921	2.50087	2.31734	6.41996	6.27937	6.04568
FUT1	1.92667	1.83511	1.70659	0.862211	0.883537	0.886071
FXYD2	0.0728227	0	0	0.500647	0.795512	0.707752
GAB1	0.206161	0.259542	0.214323	0.391453	0.394685	0.629214
GADD45A	48.9265	47.7569	51.1194	26.7217	24.221	21.5969
GJB7	0.522192	0.595758	0.41369	0.879185	1.40758	0.981222
GLIDR	0.649774	1.17073	0.670415	1.02728	1.87289	2.12393
GLS	4.52505	5.35788	4.65065	13.1727	14.3132	22.0645
GNG13	0.126423	0.0757226	0.302005	0.521486	0.451977	0.982948
GPC4	0.376669	0.421139	0.369919	0.261422	0.214464	0.102759
GPCPD1	8.7084	9.07594	7.77655	2.66753	2.32766	3.29139
GPR137C	0.23192	0.283492	0.207287	0.483439	0.582842	0.721471
GPSM3	0.74605	0.950755	0.742582	0.327383	0.189164	0.16239
GREB1	0.0978104	0.05512	0.0690912	0.0185926	0.0219335	0.0274367
GRIP1	0.144193	0.115955	0.115616	0.236026	0.437544	0.405665
GS1-124K5.4	0.932785	1.45883	1.26888	0.122148	0.432291	0.413518
GSDMA	0.0303971	0.111263	0.0605116	0	0	0
H1-2	14.4117	15.2711	15.023	43.165	40.6355	33.0426
H2AC11	2.37434	1.46249	2.06161	4.3165	2.90979	5.42657
H2AC13	0.452825	0.502268	0.35056	1.33419	1.94868	2.05891
H2AC6	12.2847	11.8802	11.7022	42.8878	40.7931	45.8525
H2AC8	2.07143	1.44268	1.00693	3.59569	4.64046	4.92825
H2BC11	1.45281	1.81287	1.39441	5.60546	5.66802	3.50337
H2BC12	29.791	26.544	25.5442	101.563	102.948	102.548
H2BC15	0.689263	0.963298	0.50311	2.39186	1.87096	1.17523
H2BC21	3.51631	3.44315	4.02385	9.44752	9.57522	10.5628
H2BC4	0.636493	1.30153	0.551788	3.42805	3.77217	4.12748
H2BC5	2.9811	4.14371	4.56354	15.7138	15.0835	15.7507
H2BC8	1.01862	0.559274	1.21667	2.50104	3.99575	4.58519
H2BC9	9.75729	10.4938	12.5558	4.23553	3.53331	4.30166
H3C10	1.58861	1.27892	1.22418	3.62373	2.59546	3.25041
H3C6	0.424314	0.110499	0.201989	1.27736	1.30994	1.37776
H3C8	0.502124	0.501255	0.099958	1.43013	1.24663	1.38696
H4C8	0.54804	0.547091	1.27282	3.16966	3.9307	1.86888
HAR1A	0.187124	0.0533716	0.106431	0	0	0.00911594
HAVCR1	6.10239	6.1299	4.73774	13.0354	12.7719	15.303
HBEGF	8.69258	8.95168	8.97808	3.99371	3.67117	4.67872
HES2	0.356459	0.431677	0.628174	0.212348	0.295963	0.119564
HEY1	0.0602063	0.160272	0.139828	0.00985503	0	0.0205311
HIF1A	26.2065	30.7635	26.5104	49.8248	51.7438	80.1326
HIF1A-AS1	0.114595	0.0381323	0.152083	0.750312	0.834556	0.859723
HMGN3-AS1	0.232994	0.240897	0.447256	0.686487	0.454502	0.723595
HMGN5	2.15949	4.14568	2.94074	4.52146	5.3732	10.3057
HNF1B	6.93503	7.62038	8.28335	15.1832	16.9915	14.3242
HOXC-AS1	1.22709	0.907381	1.08568	0.357083	0.315935	0.325462
HOXD10	3.80905	2.75783	3.55526	6.4816	8.10584	7.92206
HOXD3	0.155353	0.0886197	0.172303	0.0348746	0.0176319	0.0454091
HOXD8	0.542248	0.560303	0.596541	0.308322	0.14171	0.184913
HSD17B6	0.513377	0.72274	0.288251	0.155139	0.222233	0.0673337
HSH2D	0.186977	0.233317	0.297773	0.0826357	0.0649896	0.0765137
HTR1D	0.900465	0.434471	0.754368	0.368487	0.290628	0.353129
ICAM4	0.695033	0.732376	0.787886	2.52186	2.76091	2.80467
ID2	0.996981	0.80386	1.29768	0.41426	0.323683	0.0980718
IDS2	0.0648577	0.0242795	0.0403476	0.246831	0.201279	0.149291
IGFBP1	1.974	2.31544	2.07944	0.985516	0.506426	0.65633
IGFBP3	40.5813	36.9107	39.7237	16.409	16.2726	15.7852
IGFL2-AS1	0.106045	0.196599	0.226182	0.66953	0.586736	0.557936
IGIP	0.194573	0.143879	0.243879	0.360957	0.300577	0.693007
IGSF10	0.693448	0.532679	0.479648	1.21897	1.14153	1.74109
IL11	0.628394	0.334564	0.416982	0.133718	0.228818	0.0750014
IL1B	21.814	24.6565	24.9158	8.87479	8.75344	11.1258
IL22RA1	1.20239	1.47391	1.628	0.564399	0.965797	0.578864
IL6ST	8.44361	11.4871	9.85245	25.0371	23.5774	46.6025
INHBE	0.101241	0.0808529	0.0503854	0.00994316	0	0
INO80D	0.915372	0.769029	0.715663	1.48796	1.48507	2.69965
INSIG1	4.85642	4.96922	4.43909	10.7316	11.3417	11.5347
IQCD	6.15384	6.30559	5.73801	18.3608	19.3314	17.5191
IQCN	0.141895	0.0849895	0.0903905	0.234122	0.315647	0.214842
IRAK3	0.251207	0.379143	0.434592	0.657911	0.635555	0.88112
ITGA10	0.0445056	0.0488715	0.0398689	0.170469	0.128174	0.0910617
ITGA11	0	0.0250582	0.031799	0.123265	0.0543886	0.0583632
ITGB2-AS1	0.405557	0.394474	0.403672	1.21535	1.01205	1.06384
ITGB6	0.0536638	0.139284	0.256389	0.400554	0.527599	0.675269
ITGB8	0.19427	0.191509	0.145025	0.407829	0.482317	1.09558
JAK3	0.195421	0.216759	0.32779	0.117289	0.0970352	0.144389
JAM2	0.644313	0.657706	0.612386	1.40357	1.578	1.39265
JDP2	1.32576	1.30574	1.26854	0.536713	0.638706	0.520722
JMJD1C	1.033	1.74451	1.36895	2.51971	2.49447	5.54866
KANK3	0.71883	0.576883	0.743548	0.394519	0.321937	0.23071
KAT6B	2.03683	2.30478	1.72629	4.16436	3.91046	4.85167
KBTBD11	0.212892	0.194564	0.235779	0.0824566	0.059555	0.104297
KCNIP3	0.526901	0.511173	0.583545	1.37024	1.40764	1.22233
KCNJ16	0.364207	0.35823	0.405163	2.82476	2.69672	3.32598
KCNMA1	0.010807	0.0256222	0.0268919	0.0941975	0.105981	0.0843014
KCNMB2-AS1	0.464779	0.780835	0.383635	1.31375	1.01319	1.03215
KCNQ4	0.33131	0.319332	0.278599	0.112203	0.16451	0.111033
KDM7A-DT	2.208	1.60873	1.42696	0.554979	0.696271	0.642329
KIAA1109	1.14507	1.44543	0.9787	2.30354	2.02436	4.6377
KIAA2026	0.375413	0.421793	0.315054	0.666557	0.657914	1.25159
KIF21A	1.42794	2.00809	1.63044	2.74752	2.87865	5.41743
KIF21B	0.460481	0.378563	0.399516	0.14027	0.134499	0.171305
KITLG	0.228867	0.456943	0.396378	0.557446	0.590942	1.03021
KLF2	1.51905	1.55169	1.90757	0.806665	0.69288	0.831232
KLK10	0.115906	0.0433896	0.0432628	0	0	0
KLRC4	0.644104	0.321495	0.400694	1.3179	0.852869	2.08665
KRT15	6.37912	6.27615	6.37447	2.20347	2.43591	1.43882
KSR2	0.0774604	0.0724167	0.0452812	0.150944	0.183155	0.122012
KTN1	7.46526	12.3842	10.0504	19.2213	17.3	44.684
LCP1	0.10649	0.0398646	0.152368	0.00653666	0	0.00680894
LGALS4	0.194465	0.152529	0.152083	0.0409261	0	0.0284206
LHX6	0.322571	0.408523	0.258774	0.0756549	0.15778	0.147762
LINC00240	0.688275	0.890664	0.228359	2.32835	1.84803	1.3561
LINC00324	0.190299	0.273081	0.165737	0.560692	0.661442	0.571879
LINC00565	0.120607	0.521726	0.240093	1.05619	1.07796	0.966518
LINC00886	0.298536	0.223514	0.334292	1.08484	0.711533	0.649002
LINC00926	0.049494	0.0494083	0.0295583	0.0874967	0.245759	0.273424
LINC00997	1.24017	1.71501	1.35731	3.63818	3.83341	4.83328
LINC01004	0.346385	0.374821	0.236868	0.641434	0.533054	1.03875
LINC01191	0.0420462	0.279823	0.0976517	0.578125	0.445392	0.73125
LINC01293	0.17284	0.262919	0.0901142	0	0.00817356	0.00842004
LINC01305	0.0797482	0.0875712	0.150817	0.430775	0.237591	0.293707
LINC01355	0.340489	0.240762	0.310664	0.599138	0.556515	1.17562
LINC01359	0	0	0	0.204024	0.0458447	0.165295
LINC01776	0.230911	0.625673	0.328339	0.820739	0.698863	0.944919
LINC01963	0.51258	0.857838	0.540209	2.60593	2.24575	3.41623
LINC02454	2.03808	1.87179	2.59662	4.80396	5.6267	5.54618
LINC02615	0.348916	0.204183	0.335318	0.602642	0.669111	0.824684
LINC02735	0	0.00857024	0	0.143338	0.170515	0.149308
LIPC	0.222026	0.349512	0.250743	0.784168	0.530027	0.729471
LIPH	3.05927	3.65895	3.25385	8.64748	8.75557	9.24018
LMO4	2.08528	2.04731	1.68397	0.753512	0.88891	0.82012
LMX1B	0.745787	0.481963	0.464927	0.277562	0.346927	0.192749
LOC100130111	0.598501	0.289096	0.41316	0.758455	1.11204	0.750546
LOC100499489	0.367864	0.406927	0.188025	0.85928	0.523297	0.71199
LOC100506124	0.0311902	0.0467043	0.0310452	0.398225	0.247797	0.638173
LOC100506688	0.0637328	0.0777608	0.162116	0.0278194	0	0.00724454
LOC100507547	0.194068	0.193732	0.193166	0.465908	0.685249	0.551495
LOC100996660	0.133065	0.0553478	0.171077	0.20692	0.3634	0.294949
LOC101059954	1.80863	1.56152	1.28935	0.384066	0.509713	0.475076
LOC101927325	0.0624586	0.280577	0.341925	0.0306711	0.0155067	0.047923
LOC101927400	0.329146	0.311726	0.579628	0.978075	1.29072	1.36418
LOC101927476	1.46893	1.33383	1.03256	0.562397	0.576916	0.500921
LOC101927509	0.0279333	0.161733	0.150139	0.27434	0.321787	0.365783
LOC101928126	5.11724	3.99024	4.3502	9.42601	11.4942	12.9642
LOC101928705	0.0504259	0.0553725	0.0476819	0.121335	0.152736	0.265676
LOC101929028	0.245428	0.189321	0.230407	0.0958685	0.0941689	0.111275
LOC101929759	0.11557	0.192283	0.115033	0	0	0.0197054
LOC102723961	0.10819	0.0345609	0.0430749	0.191261	0.309434	0.327619
LOC102723983	1.53214	2.05016	1.75214	0.992494	0.453226	0.666991
LOC102724143	0.226563	0.176524	0.159507	0.428745	0.587187	0.780144
LOC102724149	0.454249	0.297096	0.436546	0.907642	1.04222	0.640983
LOC102724467	0.58448	0.486224	1.13121	0	0	0
LOC102724497	0.00545214	0.0163281	0.0217072	0.0589015	0.0866312	0.167332
LOC102724851	0.00848781	0.00211828	0.00844836	0.0375124	0.029502	0.0434166
LOC105369477	0.0498888	0.0606291	0.023749	0.0703001	0.0710848	0.264066
LOC105370135	0.175832	0.0376131	0.0625053	0	0	0
LOC105370777	0.0194954	0.0291925	0.0873215	0.411659	0.164565	0.309139
LOC105371159	0.0373914	0.0399929	0.0451928	0.00786923	0.00265235	0.00819702
LOC105371501	0	0.0281885	0	0.0831979	0.616928	0.231103
LOC105371618	0.102808	0.153946	0.25071	0.37864	0.525804	1.03599
LOC105371912	0.270139	0.441962	0.336105	0.110546	0.201204	0.0997974
LOC105371956	0.722177	0.81835	0.310841	0.268372	0.232601	0.0998396
LOC105372146	0	0	0	0.0461016	0.0266378	0.0411616
LOC105372338	0.36135	0.471717	0.332003	8.05329	8.08798	8.84373
LOC105372370	0.373314	0.239572	0.159248	0.0523772	0	0
LOC105372692	0.217097	0.130033	0.380315	1.05755	1.05211	1.07495
LOC105372838	0.186473	0.104244	0.141061	0.358954	0.362961	0.297599
LOC105373095	0.131961	0.298593	0.135725	0.583208	0.484879	0.621001
LOC105373148	0.047681	0.12164	0.105465	0.24455	0.352505	0.249316
LOC105373289	0.211461	0.211095	0.128625	0.398055	0.542497	0.444682
LOC105373567	0	0	0	0.0725821	0.0366961	0.0756055
LOC105374002	0.0708545	0.212196	0.176313	0.730674	0.562918	0.797353
LOC105374038	0	0	0	0.0594776	0.0751769	0.139399
LOC105374947	0	0	0	0.00490872	0.0545987	0.0460188
LOC105374985	0.155335	0.271366	0.334995	1.4493	1.42692	1.60237
LOC105375913	0.0209157	0.0521987	0.0260231	0.0770318	0.109048	0.331661
LOC105375914	0.184383	0.136344	0.183526	0.496313	0.542543	0.523973
LOC105376026	0.13381	0.150276	0.033297	0	0	0
LOC105376238	0	0	0	0.115775	0.17028	0.109634
LOC105376239	0.00638845	0.0191322	0.00317938	0.112937	0.117369	0.111105
LOC105376486	0.336559	0.407244	0.233481	0.62102	1.35719	1.66939
LOC105376600	0.695827	0.799471	0.692593	1.94701	1.72102	2.84742
LOC105376810	1.09043	1.00146	0.868287	2.27038	1.81925	3.07891
LOC105378035	0.0783756	0.066203	0.0120017	0.254608	0.14968	0.16653
LOC105378626	0.184389	0.12414	0.115241	0.37482	0.332161	0.473784
LOC105378936	1.8813	1.57954	1.85395	0.269197	0.340252	0.624549
LOC107984192	0.0834565	0.051269	0.108628	0.173387	0.204011	0.210164
LOC107984459	0.0329772	0.0531786	0.0252491	0.259101	0.146112	0.407437
LOC107984817	0.0473666	0.00945692	0.00942929	0.167472	0.103486	0.155065
LOC107985225	0.353435	0.188172	0.187622	0.717375	0.678583	1.06062
LOC107985297	0.318687	0.206788	0.269625	0.031299	0.0474725	0.0163014
LOC107985388	0.299874	0.756266	0.64409	0.899043	1.23823	1.63079
LOC107985678	0.0783892	0.134149	0.100318	0.307952	0.244663	0.366605
LOC107986182	0.0891777	0.103861	0.0715037	0.279781	0.218943	0.169793
LOC107986197	0	0.00558702	0	0.0274833	0.0389062	0.0916101
LOC107986820	0.372452	0.416875	0.37821	0.129321	0.127028	0.180894
LOC107986856	0.857067	0.603941	1.40508	0.247573	0.0500672	0.309462
LOC107987223	0	0.0842788	0	0.635688	0.782519	0.748537
LOC107987245	0.249347	0.117137	0.240888	0.532996	0.313171	0.615219
LOC112268021	0	0.0075363	0.00375714	0.0741442	0.0674746	0.0386163
LOC112268050	0.0324627	0.0388878	0.103398	0.159412	0.30304	0.192621
LOC286437	0.47072	0.427186	0.287508	0.798528	1.17929	1.66358
LOC389602	4.06086	4.81706	4.60248	9.29846	8.44293	10.9176
LOC613266	2.7822	2.67414	2.33689	7.84188	7.611	8.78223
LOC728715	1.87069	2.14618	0.889313	0.466169	0.221822	1.05687
LONRF2	0.0361949	0.0591255	0.0262012	0.0743274	0.0882278	0.10772
LRG1	0.219894	0.171793	0.0666131	0.0281691	0.018989	0.0293425
LRP3	2.42801	2.01176	1.63733	1.13865	0.892155	0.546468
LRRN4	16.7011	17.3138	16.3014	35.2646	34.7119	36.2257
LTB	32.7336	34.0396	37.4617	97.8407	104.743	78.3182
LUZP2	0.1634	0.370961	0.199366	0.362373	0.384739	0.727973
LYL1	0.992178	0.755436	0.719752	0.445932	0.317306	0.309671
LYNX1	0.08653	0.0965426	0.0759951	0.14997	0.283069	0.312435
LYPD3	1.0314	0.787355	1.01151	0.56607	0.225943	0.512064
LYPD6	0.107996	0.125198	0.1283	0.0273719	0.0622741	0.046332
MACROH2A2	1.26332	0.823594	1.27027	0.493761	0.460867	0.342886
MAF	0.00518615	0.0177503	0.0184359	0.0516621	0.057389	0.0447187
MALAT1	3.73907	5.74049	4.34291	8.29177	7.60111	15.9364
MAML2	0.220648	0.37793	0.2543	0.547463	0.523588	0.736595
MAP1A	0.89277	1.15762	0.895864	0.46938	0.561352	0.389656
MAP3K1	2.1551	2.08672	1.86722	4.70692	4.46227	5.73233
MAP3K7CL	0.360246	0.445502	0.433497	0.132017	0.160189	0.110013
MARS1	118.22	116.169	118.742	61.6047	60.3313	51.7225
MATK	0.343285	0.154211	0.170845	0.0168575	0.0852281	0.0438991
MATN4	0.483599	0.415175	0.3562	0.199481	0.144077	0.158316
MBNL2	2.64597	3.4286	2.67584	5.7382	5.67928	9.95093
MDFI	0.071226	0.0553021	0.118158	0.0155451	0.00785929	0.0080963
MDGA1	0.0679157	0.0459278	0.0719613	0.189347	0.147947	0.168097
MDK	262.577	260.464	265.984	126.58	134.665	116.616
MEF2C	0.108261	0.0891604	0.0484908	0.0159488	0.0268781	0.0304575
MGARP	0	0	0	0.199838	0.0808274	0.0832649
MIR100HG	0.297069	0.47062	0.366396	0.593032	0.557964	1.31145
MIR137HG	0.252181	0.453139	0.341371	0.505253	0.88154	1.09388
MIR181A2HG	1.0495	0.805908	1.48657	2.41827	1.80388	3.59267
MIR1915HG	1.38982	1.40051	1.34421	4.40399	4.88284	4.58073
MIR193BHG	0.923583	0.814569	1.05317	2.09596	1.94126	2.28876
MIR3142HG	7.64996	9.05252	8.0101	16.1344	16.8374	21.7748
MIR34AHG	0.287577	0.352868	0.244497	0.800237	0.481931	0.710986
MKLN1	5.2596	6.25059	5.40493	10.7298	10.5666	19.4312
MMP9	0.213231	0.404437	0.286524	0.0418839	0.0847027	0.119978
MPZL3	0.0945773	0.178337	0.224885	0.0464434	0.0208719	0.0860052
MSR1	0.69777	1.14728	0.66729	0.318014	0.28986	0.634527
MTHFD2	53.7206	55.0317	57.9674	20.2334	18.5038	20.5467
MUC1	2.89015	3.17183	3.047	7.17723	7.39083	6.78858
MXD1	0.435361	0.380842	0.612034	1.08438	1.199	1.3178
MYCL	0.159222	0.235856	0.3323	0.0605325	0.0663088	0.0893264
MYO7A	0.502147	0.448069	0.365785	1.23706	1.15615	0.769136
N4BP2	0.243018	0.399689	0.408434	0.739498	0.555869	1.52838
N4BP2L2-IT2	0.16298	0.167782	0.177431	0.280117	0.384401	0.385573
NAT16	0.106575	0.259328	0.04641	0.0327095	0.0264597	0.0136288
NAV2-AS6	2.89752	2.72627	2.81112	1.31492	1.45528	1.27429
NDRG1	84.4179	79.1944	81.2899	30.306	30.1869	24.675
NDUFA4L2	3.41605	2.81534	2.39198	1.11183	0.670597	0.670501
NEGR1	0.044411	0.0840819	0.0533503	0.105283	0.095812	0.211503
NEK11	0.66166	0.620963	0.662528	1.39695	1.1922	1.43487
NEURL3	0.233384	0.15532	0.608401	0.654891	0.993301	0.727648
NFAT5	4.89861	4.91388	4.23814	9.07386	9.00348	15.7368
NGFR	13.7973	13.343	13.9514	0.308623	0.544304	0.284097
NIPAL2	0.0931041	0.0464715	0.12871	0.21844	0.164374	0.275163
NIPBL	1.9639	2.75067	2.28924	3.4524	3.44644	7.752
NKD1	0.0614782	0.0573693	0.0651833	0.0262519	0.00929071	0.00820361
NLRP1	4.50003	4.88358	4.84899	1.63629	1.56534	1.70445
NLRP3	0.500986	0.678323	0.578902	0.113111	0.194434	0.194407
NOS3	0.381599	0.31343	0.235588	0.0853924	0.129518	0.0494163
NOTUM	5.7698	5.44666	5.83219	14.3922	16.1216	11.2323
NPAT	0.792394	1.04576	0.836836	1.43247	1.30175	3.01451
NPHS1	0.503957	0.556986	0.506093	1.24621	1.32715	0.994305
NPNT	6.11692	7.15915	6.27744	16.5105	15.1133	19.7715
NPR1	0.641891	0.483497	0.482084	1.62762	2.26006	1.31932
NPTXR	2.46918	2.15359	1.87516	4.58156	5.10785	4.19989
NR3C2	0.103633	0.0547694	0.11832	0.0119741	0.0302695	0.0374188
NREP	9.39513	10.4069	9.50964	21.9005	22.65	25.0173
NT5M	0.937094	0.768152	0.864489	0.433983	0.310205	0.381913
NTM	0.00713825	0.0463183	0.0106576	0	0	0
NTNG2	0.203745	0.158194	0.180265	0.0698771	0.0289052	0.0959476
NTSR1	0.705534	0.704313	0.754924	0.202102	0.303618	0.102253
NUPR1	0.237638	0.195363	0.194792	0.0915254	0.111056	0.0524358
OGDHL	0.416902	0.331738	0.426992	0.136483	0.180009	0.142168
OR2A1-AS1	0.421232	1.8397	1.54607	0.310277	0.444465	0.430935
OSGIN1	5.45534	5.00608	5.75242	2.22712	2.93401	2.39943
PAX2	10.3195	10.5063	10.6311	33.2816	32.7562	36.8303
PBLD	1.18355	0.843933	0.88354	2.27498	1.80504	1.92866
PCK2	31.7165	30.0174	31.8463	10.5187	10.3121	7.57859
PDCD1LG2	0.18711	0.285095	0.205845	0.0193438	0.0293395	0.040299
PDCD4-AS1	0.29664	0.197417	0.172235	0.789038	0.687374	0.61959
PDE2A	0.311772	0.228237	0.346527	0.0510331	0.0258014	0.0691066
PDE6B	0.0683855	0.0682672	0.19772	1.06502	0.989587	0.982783
PDZD4	10.1128	8.20907	9.09909	4.69432	4.98639	3.62524
PGAP1	0.790948	0.995922	0.804066	1.67377	1.69035	3.19999
PGF	3.64914	3.69486	3.89162	2.06075	1.99315	1.53328
PGM2L1	1.03468	1.45109	1.12502	2.04893	2.39849	3.66452
PHGDH	45.7646	41.6105	44.5467	12.3149	12.6432	9.97499
PIBF1	0.751582	1.25047	0.843433	1.52695	1.22934	3.29419
PIK3C2A	1.91692	2.50577	2.05053	3.82558	3.43299	6.81295
PIK3CA	0.938644	0.944828	0.957638	1.37	1.58208	3.46229
PIK3IP1	6.08283	5.72043	6.43547	14.7374	12.9117	11.5598
PLA2G4B	0.00923789	0	0	0.0544366	0.100914	0.122859
PLA2R1	1.84265	2.24961	2.0556	6.37985	6.03995	8.15973
PLAUR	22.5519	21.7218	23.851	10.5141	10.5527	9.03076
PLCB4	0.648336	1.03092	0.859661	2.16267	1.94766	4.027
PLIN2	55.6984	60.6072	61.9631	25.7476	25.3081	28.3846
PLPP3	2.60239	2.43077	2.79479	8.56442	7.77588	8.26726
PLXNB3	1.74602	1.45184	1.54567	0.731599	0.71628	0.641109
PMEPA1	44.5713	43.7502	43.2761	97.6411	94.4876	92.0092
PMFBP1	0.14734	0.102959	0.127101	0.477531	0.180463	0.351712
PPP1R3F	0.232407	0.205027	0.190979	0.408731	0.413293	0.539108
PPP1R9A	0.775471	0.728331	0.866141	1.44037	1.34916	2.30733
PPP2R2C	0.476255	0.427489	0.601515	0.157224	0.254367	0.155585
PRDM1	0.130178	0.14472	0.132517	0.462006	0.525926	0.644695
PRODH	0.536617	0.745763	0.806421	0.279013	0.208983	0.129171
PRR19	0.387312	0.867015	0.630838	1.57919	1.42198	1.40483
PSAT1	76.0257	83.355	81.8641	23.4844	24.9462	25.8718
PSD3	2.26275	2.09599	1.96113	4.05324	3.80689	4.99687
PSD4	3.21758	3.22501	3.30629	9.75296	10.2432	9.23585
PSTPIP2	0.156983	0.0783557	0.0625013	0.00770885	0.00779489	0.00802996
PTAFR	0.290632	0.272366	0.377836	0.13398	0.164927	0.103154
PTGFRN	1.82717	1.82401	1.81868	0.849629	0.80903	0.758022
PTGS1	2.61121	2.4529	2.70641	1.06162	1.16781	0.942988
PTH1R	0.551717	0.38969	0.466262	0.0766777	0.0982091	0.0692221
PTPN13	0.764499	0.826534	0.715002	1.32033	1.3408	2.49685
PTPRG	2.05564	2.13118	2.25486	4.5757	4.66149	5.07864
PWAR6	0.307407	0.360713	0.386499	0.492593	0.492736	1.41796
QPRT	9.43884	8.88076	9.24063	29.2475	31.6335	27.2537
RAB11FIP4	2.51405	2.40071	2.12339	1.12182	1.26502	1.03108
RAB17	0.0799958	0.113131	0.106165	0.288075	0.28467	0.225056
RAB3IL1	2.73736	2.67364	2.45674	1.35388	1.51893	1.02749
RAC2	1.01254	1.20691	1.33876	0.178108	0.405216	0.340133
RANBP2	2.24863	3.32502	2.51446	4.25469	4.29346	9.78581
RASGRF1	0.167896	0.16514	0.110591	0.0897221	0.0588477	0.0429408
RASGRP1	0.0890007	0.138206	0.142723	0.339927	0.333901	0.379378
RASGRP2	2.46417	1.84762	2.35097	1.23648	0.972444	0.930214
RBM25	6.83739	8.19208	6.76336	12.1207	11.9082	20.5975
RC3H1	0.995866	1.25679	1.01288	2.01165	1.97581	3.09423
REL	0.913758	0.879442	0.774607	1.42557	1.28952	2.59196
RELA-DT	0.18405	0.17538	0.208176	0.673743	0.540026	0.710367
RESF1	2.33883	4.78834	3.77507	7.62144	7.22277	18.6661
REV3L	0.487487	0.501617	0.461334	0.932504	0.80438	2.09461
RGS2	3.71363	4.50029	4.21129	2.0323	1.4495	1.64442
RHOB	13.0472	12.2158	13.0389	27.3226	29.9996	24.6394
RICTOR	1.74788	2.36053	1.66843	3.05124	3.08021	7.10544
RIPOR3	0.106332	0.137599	0.309674	0.46414	0.586651	0.499589
ROBO4	0.736605	0.76428	0.669677	0.12532	0.264957	0.183943
ROCK2	1.22314	1.64098	1.54421	2.27836	2.13475	4.88336
RPL26L1-AS1	0.735444	1.0577	0.84369	0.195877	0.507538	0.433578
RSF1	1.6676	2.45805	2.17206	3.37367	3.44367	6.9662
RYR2	0.118262	0.115068	0.0670513	0.0264641	0.0475724	0.0566644
S100A3	16.4805	15.1452	16.3705	35.4046	35.5665	26.5092
S100A4	0.620418	1.19445	0.793973	7.26841	8.62581	5.39503
SAMD9	0.139054	0.248403	0.207612	0.251574	0.265284	0.853545
SAMSN1	0.0234367	0.0467922	0.0155518	0.00383629	0	0
SAT1	14.8553	17.1832	17.4412	33.3887	31.9954	35.035
SCAF11	2.75868	3.71005	3.10948	5.12663	5.00711	10.0814
SCARA5	0.100349	0.0375657	0.137338	0.652928	0.616617	0.609547
SCN1B	0.800919	0.920675	0.756934	0.409192	0.465982	0.32692
SCN4B	0.090256	0.0264999	0.031707	0	0	0
SDSL	6.81472	5.18986	6.63154	2.48397	2.33727	1.97651
SEMA3C	12.4845	14.9799	13.9761	34.5145	34.1072	52.9465
SEMA7A	0.59927	0.712181	0.582282	0.308292	0.205461	0.248149
SERPINB2	0.505804	0.526882	0.514398	0.0647952	0.0764381	0.0674942
SERPINE1	210.286	211.643	214.006	79.5264	79.1433	69.619
SERPINE2	87.3426	90.2679	90.3887	37.696	39.5175	37.4279
SESN2	15.5605	14.1044	15.6743	4.04137	4.11506	3.17936
SETX	3.32946	4.10723	3.28671	6.07852	5.97531	10.3606
SGK2	0.362746	0.343059	0.30405	0.693773	0.786836	0.693374
SH2D2A	0.149547	0.114837	0.217553	0.022596	0.0114241	0.0117686
SHH	12.5331	12.7726	12.478	26.1757	26.2737	25.0178
SIK1	0.755503	0.309011	1.15932	0.314319	0.244883	0.295207
SIRPB2	0.156574	0.0655464	0.105573	0.0347234	0.0300951	0.0103342
SIRPG-AS1	0.276132	0.195626	0.195054	0.5074	0.62806	0.501197
SKIL	2.96469	4.05901	3.54374	6.66323	7.0317	12.1183
SLC16A14	3.06888	3.16872	3.20711	0.225699	0.299537	0.171428
SLC16A6	0.140296	0.134451	0.0558576	0	0	0
SLC16A9	0.2584	0.362231	0.175114	0.0377972	0.0272993	0.118115
SLC1A4	11.2061	10.1563	9.84207	3.91467	3.63244	2.81596
SLC1A5	107.558	101.008	107.757	46.5805	46.7714	43.5896
SLC25A21-AS1	1.5909	1.61626	1.73765	0.774319	0.76898	0.820976
SLC28A3	0.0318002	0.0288593	0.0230199	0.158998	0.12058	0.230687
SLC2A12	0.17437	0.280279	0.241218	0.90561	0.666244	1.03101
SLC37A1	0.495136	0.593135	0.739252	0.346743	0.26296	0.288509
SLC37A2	2.21215	1.82373	1.78747	0.543153	0.524531	0.432279
SLC3A2	158.782	157.366	158.633	62.9749	59.1367	48.452
SLC44A2	56.4204	55.4402	57.7599	18.5656	19.3078	17.6714
SLC5A3	3.44963	4.32714	3.59863	15.2649	15.9485	23.7101
SLC6A16	1.29292	1.60337	1.72472	2.90616	2.97169	3.50448
SLC7A11	4.77809	4.82596	3.88308	1.52656	1.48775	2.72784
SLC7A5	217.423	201.201	208.485	75.7782	77.4768	72.2017
SLC7A6	7.80177	8.29109	6.5359	15.5918	15.4226	17.7797
SLIT2	3.24061	3.20108	2.97427	7.00667	6.92096	6.29278
SLITRK6	0.0644761	0.0351079	0.0758448	0.333888	0.302689	1.11535
SMAD6	0.414159	0.372391	0.353761	0.764471	0.802173	0.748235
SMIM38	0.177635	0.127312	0.117873	0.05368	0.0452326	0.0326177
SNCG	0.785194	0.71035	0.537311	0.337382	0.121838	0.0753076
SNRK-AS1	0.0788371	0.114474	0.071337	0.288595	0.185054	0.241959
SNX29	1.32954	1.32452	1.395	3.80927	3.91653	3.75538
SOCS1	1.7301	2.81156	2.14256	4.60357	5.51402	3.82803
SP6	1.42597	1.08604	1.15628	0.531218	0.628707	0.377281
SPOCD1	0.0350368	0.0408056	0.0813726	0	0.00579911	0.00597399
SPTBN4	0.195592	0.18828	0.164553	0.077753	0.124868	0.0571707
SREK1	2.36748	3.60743	2.6487	4.62271	5.04341	10.653
SSPN	0.25948	0.188386	0.164356	0.467982	0.374816	0.632271
STARD4	3.60563	3.78083	3.44952	9.21237	9.48106	16.4659
STARD4-AS1	0.018031	0.0494995	0.0269208	0.128388	0.0581958	0.166017
STARD6	0.433451	0.198321	0.341554	0.0886881	0.0179356	0.110859
STC2	88.0645	89.2095	90.6388	36.4718	37.1986	35.9666
STEAP1	2.79904	3.46725	3.39611	0.983223	1.50144	0.898769
STS	0.168982	0.152469	0.132617	0.414904	0.3679	0.408915
SYDE2	0.295146	0.346954	0.362413	0.590577	0.687566	1.07515
SYNE2	1.31488	1.97672	1.62062	3.5264	3.21624	6.22686
SYNE3	0.0499168	0.0482732	0.0822904	0.00459605	0.0247859	0.0159583
SYNGR4	0.0818486	0.0933793	0.325873	0.0114837	0.0348355	0.011962
SYT12	3.08264	2.96231	2.87568	9.03737	8.55251	6.68914
SYT8	0.0463269	0.203486	0.0368893	0.209295	0.432463	0.417068
TAOK1	4.72971	4.77856	3.81952	8.16242	7.97965	13.1234
TAPT1-AS1	0.00977831	0.00976139	0	0.0768282	0.0582643	0.150053
TAS2R4	0.148896	0.113956	0.0839823	0.233975	0.280947	0.248799
TCEA3	2.07217	2.35289	2.15052	0.954873	1.08256	1.16545
TCIM	0.748931	0.937942	0.826772	0.147109	0.297502	0.45971
TENM3-AS1	0.0234912	0.0469011	0.0514404	0.166113	0.102647	0.120162
TET2	0.448365	0.444345	0.493172	1.03227	0.887304	1.52399
TGM4	0.663955	0.493578	0.534319	1.08912	1.45902	1.16339
THBD	1.31308	1.28619	1.07994	0.575177	0.526499	0.536069
THORLNC	0.367456	1.0597	0.487664	0	0.162185	0.0835379
TM6SF1	0.532264	0.619263	0.442127	0.150432	0.117886	0.317313
TMEM80	1.72259	1.50882	1.63715	3.05616	3.63107	3.28579
TMEM92	0.725227	0.635683	0.98595	0.234526	0.421589	0.361918
TMIE	0.315379	0.305292	0.142688	0.0093861	0.0759269	0.0782166
TMTC3	1.24665	1.88748	1.41665	2.3297	2.19407	4.99874
TNFAIP6	0.0175143	0.034968	0.0174329	0.068805	0.139146	0.412108
TNFRSF17	0.0279521	0	0	0.466692	0.388625	0.057192
TNFSF10	0.0333517	0.183117	0.0248975	1.30203	0.819748	1.16008
TNFSF14	0.164436	0.421469	0.305225	0.811847	0.798842	1.08663
TNFSF15	0.249949	0.342619	0.278493	1.7147	1.80423	2.0342
TNFSF18	1.76988	1.92991	1.52676	0.525929	0.721084	0.492125
TNS4	0.353189	0.358087	0.329576	0.108399	0.12605	0.11856
TP53I11	0.592701	0.540052	0.574108	0.210965	0.213319	0.309281
TPPP	5.25809	4.75517	4.93243	2.35771	2.43026	2.00939
TRAF1	0.80519	0.909121	1.35417	0.474478	0.501833	0.414709
TRIB2	3.30237	2.89602	3.16147	6.66123	6.10928	6.86832
TRIB3	48.488	44.5073	46.4885	18.2105	18.67	12.5002
TRIM2	1.07209	1.07543	1.04898	2.01386	2.20947	3.03214
TRIM59-IFT80	0.00727695	0.0472183	0.0470803	0.200112	0.0867198	0.189837
TRPM8	0.0961067	0.126093	0.114792	0.350587	0.324504	0.325862
TSPEAR-AS1	0.224373	0.136338	0.0776799	0.459886	0.397204	0.369262
TTC3	4.84613	6.27036	4.66104	13.253	12.3693	23.0796
TTYH2	0.347155	0.382404	0.536184	0.0881765	0.136713	0.183699
TUBE1	4.65978	5.27832	4.91344	1.98523	2.87374	2.50328
TXNIP	15.4244	16.5949	15.9158	2.7038	2.79391	2.55408
UCN2	0.831287	0.780057	0.711584	2.09006	3.00497	1.70087
UHRF1BP1L	0.628508	0.829719	0.578814	1.09898	1.37958	1.6976
UPK1A-AS1	4.91842	4.72226	5.86219	2.49217	2.20888	2.17934
UPP1	51.4075	50.594	53.212	21.1812	20.5938	16.5158
USP34	3.74594	4.78292	3.93661	8.42855	8.31501	15.7239
UTRN	2.35968	2.88481	2.37752	5.30826	4.86374	8.83328
VPS13A	0.478197	0.729565	0.630142	1.3484	1.05581	3.18757
VPS13B	1.64553	1.82407	1.4942	3.13382	3.10809	4.75322
VPS13C	0.737937	1.2679	0.902595	1.65158	1.63761	3.41753
VSIG1	0.754928	0.717389	0.512988	1.21909	1.50663	1.62632
VWA5A	0.150123	0.264758	0.293869	0.0638904	0.09939	0.0614323
WNT11	0.834484	0.575194	0.543848	0.234162	0.345298	0.152447
YARS1	109.067	101.009	107.674	49.9112	51.7256	41.3756
ZBED2	0.179985	0.0673774	0.100771	0.419822	0.61442	0.448818
ZBED6	1.09228	1.01175	0.726924	2.46547	2.27731	3.1955
ZBTB20	0.180732	0.235932	0.22054	0.476181	0.40211	1.08181
ZHX1-C8orf76	0.169296	0.206559	0.262126	0.554234	0.541739	0.67354
ZNF185	64.8645	62.5252	63.0029	29.7914	29.2883	26.2267
ZNF385C	0.717875	0.36646	0.259832	0.200296	0.153924	0.0751102
ZNF407	0.557221	0.511514	0.462996	0.939861	1.02854	1.16986
ZNF433	0.644302	0.643187	0.664211	0.369125	0.281838	0.196174
ZNF652	0.997044	1.02429	0.864489	1.63271	1.64476	2.50019
ZNF69	0.289666	0.525217	0.435421	0.748959	0.868861	1.51193
ZNF708	0.667456	0.705209	0.669203	1.04788	1.05958	2.19303
ZNF713	0.554341	0.730236	0.773608	1.43685	1.5664	1.13422
ZNF844	1.18651	1.42134	1.26347	0.591898	0.68828	0.593432
ZNF888	3.34619	2.95378	3.02224	5.14764	5.31279	8.31516
