# Supplementary material for: Peptide-based Self-adaptive Implant Coating Sequentially Regulates Bone Regeneration to Enhance Interfacial Osseointegration
Source: Research Square preprint supplement (doi:10.21203/rs.3.rs-5132912/v1), 2024-10-01
Supplement: Supplementary file 585 [file 0-volcano.xls]

Names	log2FoldChange	p-value
A1BG	0.775013782	0.598520508
A2M-AS1	-0.932674748	0.4511288
A3GALT2	0.85706179	0.501191188
A4GALT	-0.586713771	3.92E-06
AAAS	0.239181877	0.039816852
AACS	-0.167172579	0.086360798
AADACL2-AS1	-0.290811362	0.407583406
AADAT	0.189747015	0.260662013
AAGAB	0.055940846	0.533936224
AAK1	-0.144976859	0.196161862
AAMDC	0.302951693	0.06748789
AAMP	0.084845021	0.412433374
AANAT	-1.72385751	0.236158582
AAR2	0.042936867	0.684686909
AARS1	0.89920526	7.93E-22
AARS2	0.306187806	0.033134296
AASDH	-0.242850869	0.218251979
AASDHPPT	-0.21168724	0.142678979
AASS	-0.639895757	0.000351086
AATF	0.439585069	3.96E-05
AATK	0.204558943	0.502024721
ABALON	-0.757778613	0.126921334
ABAT	0.848874955	0.076867497
ABCA1	-0.766321695	1.41E-05
ABCA10	-0.21738334	0.5362988
ABCA12	-1.663666508	9.04E-12
ABCA2	-0.064873706	0.59571009
ABCA3	-0.397944504	0.002043157
ABCA4	0.869671547	0.585203487
ABCA5	-0.373649433	0.105325937
ABCA6	0.67687635	0.512008812
ABCA7	-0.073359104	0.541947695
ABCA8	-0.235357792	0.865577767
ABCA9	-2.609051084	0.16493028
ABCB1	-0.133187707	0.924739429
ABCB10	-0.128205407	0.306695607
ABCB4	-1.002750698	0.448741055
ABCB6	-0.00616143	0.974698223
ABCB7	0.032327893	0.764870012
ABCB8	0.056587121	0.650375952
ABCB9	-0.037297226	0.856346309
ABCC1	-0.038022428	0.691133444
ABCC10	-0.059849734	0.691253783
ABCC11	-0.955142773	0.311365651
ABCC2	-0.51098864	0.327046395
ABCC3	-0.636872644	1.18E-14
ABCC4	-0.704762408	1.18E-09
ABCC5	-0.378460917	3.63E-05
ABCC6	-0.775208754	0.017199914
ABCD1	0.043048258	0.806651193
ABCD3	-0.086012557	0.650017815
ABCD4	0.029028957	0.802937042
ABCE1	-0.241306447	0.147300357
ABCF1	0.121716142	0.195831811
ABCF1-DT	-2.913745333	0.013101669
ABCF2	-0.122280478	0.325671563
ABCF3	-0.04539936	0.696376555
ABCG1	0.202379121	0.735882327
ABCG2	-0.466841449	0.743215728
ABCG4	0.702728413	0.022504394
ABHD1	0.038216955	0.945667023
ABHD10	0.465067458	8.26E-06
ABHD11	0.249508117	0.045549425
ABHD11-AS1	0.656318773	0.665460786
ABHD12	0.216125443	0.025935028
ABHD13	-0.268332944	0.257134416
ABHD14A	-0.06965767	0.714150668
ABHD14B	0.315684026	0.001743882
ABHD15	-0.074881441	0.573829231
ABHD16A	-0.036091339	0.772478401
ABHD16B	-0.784933682	0.586930291
ABHD17A	0.130687642	0.280786408
ABHD17B	-0.341226997	0.059641533
ABHD17C	0.134396847	0.403390975
ABHD18	-0.358984059	0.050933696
ABHD2	0.24918476	0.003621053
ABHD3	-0.036866763	0.798430546
ABHD4	-0.011507355	0.923288155
ABHD5	0.131620143	0.325367866
ABHD6	0.021145743	0.892985306
ABHD8	0.106676041	0.451397678
ABI1	-0.018584695	0.849936077
ABI2	0.009374877	0.927571914
ABI3BP	-0.313952458	0.731711217
ABITRAM	0.041639222	0.77093438
ABL1	0.05929405	0.570407201
ABL2	0.066775139	0.508022001
ABLIM1	-0.454258952	0.002179404
ABLIM2	0.048209854	0.926604959
ABLIM3	0.182301572	0.149398803
ABR	-0.098983081	0.321132935
ABRACL	-0.095765609	0.329329046
ABRAXAS1	0.1679805	0.363420393
ABRAXAS2	-0.101761519	0.587367597
ABT1	0.127505432	0.351488337
ABTB1	0.146145789	0.26398671
ABTB2	-0.135726706	0.195865841
ACAA1	0.037015197	0.754487648
ACAA2	0.258555282	0.00438318
ACACA	-0.457121703	3.76E-08
ACACB	0.411627151	0.027113246
ACAD10	-0.026224922	0.838578345
ACAD11	0.109556885	0.790677674
ACAD8	-0.068295872	0.522097559
ACAD9	-0.0673848	0.586158438
ACADL	2.887678173	0.196638871
ACADM	0.085136068	0.568093985
ACADS	0.235309331	0.268548522
ACADSB	0.081083704	0.650275494
ACADVL	0.423242482	0.000143209
ACAP1	0.724571105	0.030156433
ACAP2	-0.41310423	0.030630013
ACAP3	-0.187447586	0.23521503
ACAT1	0.104044192	0.301055293
ACAT2	-0.312635125	0.002093491
ACBD3	0.091736884	0.514406274
ACBD3-AS1	-3.859309627	0.101129305
ACBD4	-0.038157503	0.838297703
ACBD5	0.018276167	0.888959882
ACBD6	0.222922279	0.078051827
ACBD7	1.030837763	2.47E-08
ACCS	-0.583958856	0.000695896
ACD	0.430788118	1.43E-05
ACE	0.477537693	0.521782344
ACER2	0.311774595	0.340212207
ACER3	-0.351645853	0.002163089
ACHE	1.06303651	0.004083773
ACIN1	-0.151273873	0.074984217
ACKR2	-0.685192089	0.532606085
ACLY	-0.190904732	0.028748418
ACO1	-0.289666635	0.000931318
ACO2	0.202162189	0.083983792
ACOT1	-0.512666728	0.006530198
ACOT11	0.26165866	0.125178365
ACOT13	0.259866962	0.030170495
ACOT2	-0.27361319	0.056494138
ACOT4	0.073509129	0.721835413
ACOT7	0.240578954	0.082270628
ACOT8	-0.250387877	0.020835014
ACOT9	-0.141689881	0.128199927
ACOX1	-0.026543534	0.788877523
ACOX2	1.276355107	0.097726949
ACOX3	-0.081861164	0.574976634
ACOXL	0.635442605	0.626947874
ACOXL-AS1	-2.914003189	0.191380257
ACP1	0.148894589	0.118608394
ACP2	-0.352874015	0.000135353
ACP6	0.116982909	0.428381206
ACP7	1.271176698	0.000107994
ACRBP	0.082753735	0.881101988
ACSF2	-0.262703801	0.024691216
ACSF3	0.044879007	0.715848211
ACSL1	0.19296357	0.058916848
ACSL3	-0.234637443	0.147584788
ACSL4	-0.319955679	0.045204715
ACSL5	-0.621385825	0.536055022
ACSL6	0.50501253	0.40345943
ACSM3	1.098310287	0.146722871
ACSS1	0.110288147	0.424965351
ACSS2	0.159003276	0.126011601
ACTA1	-0.132307025	0.935227666
ACTA2	-0.221630686	0.148635391
ACTA2-AS1	-4.32184367	0.03914285
ACTB	0.20617576	0.030701204
ACTBL2	0.185044045	0.695186276
ACTG1	0.343347577	0.003280414
ACTL10	-0.666959494	0.143991913
ACTL6A	0.264557878	0.020262205
ACTN1	0.145740107	0.150647816
ACTN1-DT	-0.494601309	0.799390141
ACTN2	1.114897841	0.170577789
ACTN3	0.08482331	0.84621025
ACTN4	0.196049233	0.063142269
ACTR10	0.018595537	0.870644399
ACTR1A	0.075035399	0.466170064
ACTR1B	-0.052899434	0.657413686
ACTR2	-0.00120186	0.992241267
ACTR3	0.131902661	0.236442447
ACTR3-AS1	-1.282226014	0.410184614
ACTR3B	-0.235581709	0.115211146
ACTR3C	-1.276881921	4.29E-08
ACTR5	0.205420005	0.121358514
ACTR6	0.252738923	0.141698215
ACTR8	-0.148028029	0.139553815
ACTRT3	-0.481114751	0.013857961
ACVR1	0.236771895	0.031203805
ACVR1B	0.179427984	0.077998099
ACVR1C	-1.394360008	0.448460949
ACVR2A	-0.422193343	0.110499962
ACVR2B	-0.429236408	0.004420774
ACVR2B-AS1	-0.42796073	0.296573599
ACY1	0.318171775	0.609641708
ACY3	1.988713392	0.140418187
ACYP1	0.262276547	0.13937813
ACYP2	-0.722593025	0.002051451
ADA	0.700136923	1.82E-07
ADAL	0.016493837	0.926496296
ADAM10	-0.554843971	0.000584661
ADAM11	-0.233490197	0.1459936
ADAM15	0.586788629	1.77E-06
ADAM17	0.022671616	0.839943986
ADAM19	-0.344485806	0.001685612
ADAM20	-0.309722074	0.790472889
ADAM21	-0.58805389	0.662604687
ADAM22	-0.507992279	0.000516992
ADAM23	-0.371751622	0.70309876
ADAM28	-1.695232353	0.014094653
ADAM32	-0.305887787	0.829958504
ADAM33	2.742314265	0.08867215
ADAM8	1.040552883	1.29E-16
ADAM9	-0.073936497	0.611163699
ADAMTS1	-0.136854158	0.474305225
ADAMTS10	0.128355334	0.588272409
ADAMTS12	1.267617757	0.370282963
ADAMTS13	-0.404393144	0.083753588
ADAMTS15	-0.036281364	0.891005491
ADAMTS16	0.050223753	0.895191167
ADAMTS17	0.203795405	0.763318105
ADAMTS19	0.804109409	0.714722964
ADAMTS2	4.950759712	0.031011918
ADAMTS3	-0.305488747	0.859709105
ADAMTS5	-2.128705336	1.54E-08
ADAMTS6	-0.148625998	0.737110227
ADAMTS7	-1.640809755	2.37E-25
ADAMTS9	-0.332434503	0.004622855
ADAMTS9-AS2	-0.757255442	0.130317576
ADAMTSL3	1.637812731	0.142480918
ADAMTSL4	1.124201307	2.60E-15
ADAMTSL4-AS1	0.598812194	0.50008362
ADAMTSL4-AS2	-1.208792829	0.038456946
ADAMTSL5	0.126550469	0.259897995
ADAP1	0.991915924	0.000285843
ADAP2	0.113587337	0.434468209
ADAR	-0.079783598	0.314235604
ADARB1	0.00922704	0.928950949
ADARB2	-1.521765902	0.207090502
ADAT1	0.029937084	0.770855816
ADAT2	-0.213280997	0.287175722
ADAT3	-1.460930514	7.33E-10
ADCK1	-0.356484443	0.09926668
ADCK2	0.199473258	0.112070969
ADCK5	0.120880319	0.402032864
ADCY3	-0.070743662	0.46410775
ADCY5	0.384496884	0.222874287
ADCY6	-0.321748958	0.001733136
ADCY6-DT	-0.333207817	0.849462529
ADCY7	0.341132458	0.004384203
ADCY8	0.57450506	0.785316079
ADCY9	0.208500897	0.121613434
ADD1	0.005509842	0.950072971
ADD3	-0.355689087	0.059352159
ADGRA2	1.191225743	1.27E-07
ADGRA3	-0.177314608	0.08093353
ADGRB1	0.265245081	0.068473291
ADGRB2	0.526617852	1.41E-06
ADGRB3	-0.019608491	0.963832331
ADGRB3-DT	3.584698991	0.073610496
ADGRE1	-0.440644517	0.006854737
ADGRE2	0.519146311	0.006596091
ADGRE5	0.166030142	0.05093406
ADGRF1	-2.143104911	8.11E-08
ADGRF3	-1.931894752	0.167693083
ADGRF4	1.469416333	0.264599937
ADGRF5	-2.221627158	0.000262567
ADGRG1	0.472193106	3.03E-07
ADGRG5	4.017341191	0.133685962
ADGRG6	-0.77972277	2.76E-07
ADGRL1	-0.15531167	0.139896637
ADGRL1-AS1	-0.24867141	0.58294881
ADGRL2	-0.224941254	0.1123186
ADGRL3	4.167590852	0.096156351
ADGRV1	-0.301529503	0.108149347
ADH5	0.179292945	0.035296883
ADHFE1	-0.931858823	0.031646622
ADI1	-0.476373257	2.74E-05
ADIPOR1	0.234476364	0.008440568
ADIPOR2	-0.33157814	3.50E-05
ADIRF-AS1	0.4312122	0.005157993
ADK	0.079898486	0.421262493
ADM	0.183726314	0.121308289
ADM-DT	-0.358612472	0.71056438
ADM2	1.768276106	4.14E-24
ADM5	0.457229322	0.217318061
ADNP	-0.217658776	0.013938637
ADNP-AS1	-1.097973808	0.021483155
ADNP2	0.395616972	3.52E-05
ADO	0.019235574	0.863526444
ADORA1	-0.546556844	1.18E-07
ADORA2A	-0.433447599	0.707175562
ADORA2B	-0.105580334	0.29544236
ADPGK	-0.04066609	0.690178785
ADPRH	-0.25188305	0.274831845
ADPRHL1	0.629847461	0.025326277
ADPRM	0.318371976	0.140211157
ADPRS	-0.079369655	0.544029429
ADRA2C	0.636518372	0.019323814
ADRB1	0.374359306	0.465589896
ADRB2	0.70890076	0.000571596
ADRM1	0.195873665	0.07990807
ADSL	0.197019535	0.056925877
ADSS1	0.22801241	0.393962259
ADSS2	-0.044136308	0.752653331
ADTRP	0.573475982	0.076937391
AEBP2	-0.268497753	0.057370786
AEN	0.379901226	0.001120276
AFAP1	-0.039076431	0.64184658
AFAP1-AS1	-0.739521649	0.244033664
AFAP1L1	0.305047278	0.004439022
AFAP1L2	-0.270017217	0.002826588
AFDN	0.175814357	0.036383393
AFDN-DT	1.277866788	0.017826392
AFF1	-0.804048395	1.30E-12
AFF1-AS1	-0.230616848	0.333954134
AFF3	3.350647974	0.088302315
AFF4	-0.532685875	5.45E-05
AFG1L	-0.086650533	0.767979434
AFG3L2	0.068890227	0.445229018
AFMID	-0.14499891	0.222688493
AFTPH	-0.030111209	0.831104968
AFTPH-DT	-2.241667386	0.102833295
AGA	0.49067782	0.003791159
AGA-DT	-0.331835333	0.788311564
AGAP1	0.005483753	0.951802369
AGAP1-IT1	2.083450086	0.205174982
AGAP11	-0.148965799	0.821519276
AGAP2	0.394913949	0.018266597
AGAP2-AS1	-0.068249863	0.618310833
AGAP3	-0.184815059	0.120563681
AGAP4	-0.026501451	0.863572049
AGAP5	-0.3570509	0.138457828
AGAP6	-0.60315123	0.245030042
AGAP9	-0.197152424	0.276879682
AGBL2	-0.469501509	0.077561225
AGBL3	-0.291608432	0.393029788
AGBL5	-0.029655317	0.773744659
AGER	0.208862966	0.411030644
AGFG1	-0.222518807	0.076224311
AGFG2	-0.125358391	0.391754937
AGGF1	-0.437520556	0.006191562
AGK	0.233460182	0.021307837
AGL	-1.045920585	9.38E-09
AGMAT	0.393127228	0.32915417
AGMO	2.991739283	0.064566803
AGO1	-0.031090336	0.769483736
AGO2	-0.492356539	1.19E-06
AGO3	-0.511076068	0.000270753
AGO4	-0.309644596	0.003620236
AGPAT1	0.207599096	0.02087252
AGPAT2	0.14482531	0.240961832
AGPAT3	-0.085338467	0.291453401
AGPAT4	-0.370078917	0.001266074
AGPAT4-IT1	-0.36511293	0.521819248
AGPAT5	-0.020779556	0.886442616
AGPS	-0.004551502	0.975389888
AGRN	-0.075595614	0.547349709
AGTPBP1	-0.320964266	0.10067442
AGTRAP	0.272966619	0.020250796
AHCTF1	-0.812701299	3.36E-05
AHCY	0.087403236	0.36685472
AHCYL1	-0.094577623	0.259407551
AHCYL2	-0.364829609	0.000415563
AHDC1	0.298579684	0.00472859
AHI1	-1.275188919	1.68E-07
AHI1-DT	-0.468877597	0.761676695
AHNAK	-0.040660031	0.633045168
AHNAK2	0.358068355	0.000154675
AHR	-0.049661463	0.721362464
AHSA1	0.146671787	0.195369223
AIDA	0.092791094	0.388164881
AIF1L	0.672964316	2.34E-06
AIFM1	-0.104017729	0.255372246
AIFM2	0.133748829	0.26540606
AIFM3	-0.428212149	0.294459905
AIG1	0.311839253	0.003433113
AIMP1	-0.003761685	0.981552553
AIMP2	0.07959313	0.431868981
AIP	-0.198879032	0.214333572
AIPL1	1.858531262	0.174723357
AJM1	0.213400124	0.241990045
AJUBA	0.230629142	0.009019863
AJUBA-DT	-0.258971858	0.447243991
AK1	-0.267923663	0.033281144
AK2	0.305265929	6.93E-05
AK3	-0.020771861	0.862195674
AK4	-0.484736844	3.63E-06
AK5	0.68415307	0.146590932
AK6	-0.176291454	0.33729566
AK7	0.211724875	0.248288889
AK8	0.816347247	0.021947132
AK9	-0.297098219	0.184362177
AKAP1	0.085686933	0.334759884
AKAP10	-0.199490482	0.061779865
AKAP11	-0.769080044	0.001374647
AKAP12	0.02879189	0.819403139
AKAP13	-0.337365859	0.001592268
AKAP17A	0.289950636	0.69980465
AKAP3	0.463353621	0.316717646
AKAP5	-1.76361187	9.45E-08
AKAP6	0.391601763	0.498761648
AKAP7	0.503551692	0.029300255
AKAP8	-0.061347604	0.581470198
AKAP8L	-0.196167288	0.127222491
AKAP9	-0.949175871	0.051932046
AKIP1	0.390889613	0.002076211
AKIRIN1	-0.046708692	0.589320542
AKIRIN2	0.350162474	0.000457406
AKNA	-0.263370748	0.013453828
AKNAD1	-0.187170783	0.742994011
AKR1A1	0.045633481	0.686638475
AKR1B1	-2.083725366	2.04E-134
AKR1C1	1.09507906	0.174927707
AKR1C2	1.157606633	0.298349965
AKR1C3	0.563930436	0.150388388
AKR1D1	1.658307401	0.182509566
AKR7A2	-0.012862193	0.922471431
AKR7A3	-0.308943354	0.514618257
AKT1	0.099671632	0.373686286
AKT1S1	-0.241327279	0.012085848
AKT2	-0.185304185	0.075111858
AKT3	-0.143814704	0.284434764
AKTIP	0.46381582	0.001984718
ALAD	-0.119961654	0.183325552
ALAS1	0.156986679	0.072566709
ALCAM	-0.101564097	0.477859489
ALDH16A1	-0.191127948	0.249715943
ALDH18A1	-0.045057313	0.574975313
ALDH1A3	0.021966333	0.786133201
ALDH1A3-AS1	0.10873697	0.726601508
ALDH1B1	0.418261837	4.58E-06
ALDH1L1	1.729377391	2.59E-07
ALDH1L2	1.6315551	3.68E-25
ALDH2	0.491529615	8.82E-05
ALDH3A2	0.128391752	0.166578615
ALDH3B1	1.527152863	2.44E-06
ALDH4A1	-0.020645519	0.882748509
ALDH5A1	0.285002268	0.018385283
ALDH6A1	0.126447496	0.245197555
ALDH7A1	0.169029846	0.060080898
ALDH8A1	0.081765834	0.9509047
ALDH9A1	0.067270414	0.435887766
ALDOA	0.566994638	6.38E-08
ALDOC	0.341745879	0.495779476
ALG1	-0.121497707	0.312344924
ALG10	-0.037203004	0.881869245
ALG10B	-0.281208796	0.209408488
ALG11	-0.163420727	0.441117004
ALG12	-0.164521775	0.191273829
ALG13	-0.264232456	0.080518518
ALG14	0.021285827	0.908164869
ALG2	0.013718085	0.896966629
ALG3	0.105571075	0.302300034
ALG5	0.182146818	0.259989337
ALG6	0.35644045	0.019662092
ALG8	-0.16757533	0.26904074
ALG9	0.345973476	0.001704754
ALKBH1	-0.039435372	0.808306176
ALKBH2	0.414861136	0.009471754
ALKBH3	0.294684728	0.027657056
ALKBH4	0.062840896	0.643812073
ALKBH5	-0.135373461	0.093557568
ALKBH6	0.187326659	0.206806223
ALKBH7	0.116954384	0.497388313
ALKBH8	-0.519600522	0.015865532
ALMS1	-0.576707191	0.006270928
ALMS1-IT1	0.562135529	0.09724622
ALOX12	4.305308299	0.077225887
ALOX12-AS1	0.198855188	0.478357096
ALOX12B	-0.234528163	0.619732067
ALOX15	2.692945315	0.289756958
ALOX5AP	1.292761935	5.26E-21
ALOXE3	3.399519849	3.87E-05
ALPK1	0.484372478	0.001357484
ALPK2	0.132783863	0.523347156
ALPK3	-1.899101157	1.30E-16
ALS2	0.004683958	0.965448332
ALS2CL	0.63781989	7.31E-06
ALYREF	0.116896334	0.485200357
AMACR	-0.180785554	0.714371802
AMBRA1	-0.069350935	0.503393305
AMD1	-0.397909892	0.005569268
AMDHD1	0.803113195	0.237732358
AMDHD2	-0.056054708	0.702375886
AMER1	0.093233547	0.539829637
AMFR	0.02254659	0.794842017
AMH	0.578618027	0.002002621
AMIGO1	-0.026774355	0.884501171
AMIGO2	-0.387663884	0.076511637
AMIGO3	-0.124472917	0.452903912
AMMECR1	-0.33860034	0.03913399
AMMECR1L	-0.191041232	0.067430824
AMN	-0.231293314	0.818291618
AMN1	-0.376661111	0.006964085
AMOT	0.553701683	7.19E-07
AMOTL1	0.54041528	0.002315118
AMOTL2	0.198732452	0.030010834
AMPD2	-0.335379401	0.005816639
AMPD3	0.715757406	0.090865169
AMT	0.574406046	0.078182143
AMY2B	-0.902758905	0.071550563
AMZ1	0.903707191	0.583265716
AMZ2	0.485556735	6.51E-08
ANAPC1	-0.126588883	0.225959456
ANAPC10	0.100441792	0.56658163
ANAPC11	0.501664918	0.000278599
ANAPC13	0.19224821	0.100222153
ANAPC15	0.129567188	0.269951823
ANAPC16	-0.100800994	0.298198848
ANAPC2	-0.225489368	0.086576706
ANAPC4	-0.009534907	0.963381968
ANAPC5	0.00954515	0.916008536
ANAPC7	-0.175410653	0.109822028
ANG	0.498325314	0.003908739
ANGEL1	-0.169950094	0.174804752
ANGEL2	-0.006364327	0.962340154
ANGPTL4	0.29929827	0.025817899
ANGPTL6	0.183917923	0.785949526
ANK1	-1.486778775	0.002193506
ANK2	-0.066685479	0.616336695
ANK3	0.12857682	0.805117647
ANKAR	0.294785972	0.328044124
ANKDD1A	0.30393323	0.092179172
ANKDD1B	2.117614502	0.240999917
ANKEF1	0.3935452	0.000917159
ANKFY1	-0.131427645	0.11607669
ANKH	0.38567139	0.000849611
ANKHD1	-0.334655587	0.211599379
ANKHD1-EIF4EBP3	-1.097371741	0.363820332
ANKIB1	-0.541944518	0.000191198
ANKLE1	-0.100764403	0.903165204
ANKLE2	-0.313224325	0.00044752
ANKMY1	0.179297942	0.254247047
ANKMY2	-0.023205619	0.857409065
ANKRA2	0.273852136	0.095819009
ANKRD1	1.027235329	0.005776528
ANKRD10	-0.868462875	1.01E-08
ANKRD11	0.393670098	5.50E-07
ANKRD12	-0.75754972	0.212961996
ANKRD13A	-0.090345117	0.383656777
ANKRD13B	0.177970121	0.159081545
ANKRD13C	-0.421148353	0.012272635
ANKRD13D	-0.129920474	0.287519907
ANKRD16	0.483141419	0.017415574
ANKRD17	-0.571678712	1.29E-06
ANKRD17-DT	0.501091431	0.636216074
ANKRD18A	-0.203295744	0.241243695
ANKRD18B	-0.278814544	0.240813688
ANKRD2	-5.180210716	0.003685187
ANKRD20A1	4.551768152	0.030780813
ANKRD20A4-ANKRD20A20P	0.164066479	0.856748648
ANKRD23	-0.096414724	0.773097012
ANKRD24	1.570664642	0.003399193
ANKRD26	-1.124386797	0.031268085
ANKRD27	0.205032491	0.028790301
ANKRD28	-0.242688545	0.077677678
ANKRD29	0.642902755	0.036588335
ANKRD31	-0.315024372	0.859505652
ANKRD33B	0.324352263	0.001182508
ANKRD34A	-0.034344328	0.916570709
ANKRD34B	-3.332390166	0.009267057
ANKRD35	1.21830066	0.485570708
ANKRD36	-0.294702024	0.303140559
ANKRD36B	-0.167334947	0.642846356
ANKRD36C	-0.736260636	0.004139339
ANKRD37	0.314732651	0.109104429
ANKRD39	0.569232577	0.003022461
ANKRD40	0.033676655	0.701979001
ANKRD42	-0.051072301	0.698497676
ANKRD42-DT	0.294291902	0.56175212
ANKRD44	-0.176942886	0.383527469
ANKRD45	0.826123348	0.63091441
ANKRD46	0.596867362	0.006343556
ANKRD49	-0.399368137	0.035702713
ANKRD50	-0.551642458	0.002405422
ANKRD52	-0.264893604	0.001931115
ANKRD54	-0.048844322	0.714923971
ANKRD6	-0.076376244	0.537258646
ANKRD61	0.254801128	0.768317771
ANKRD63	-0.433093111	0.43984204
ANKRD9	-0.103455295	0.392571425
ANKS1A	0.07129603	0.512740735
ANKS1B	-0.067726956	0.934203472
ANKS3	-0.125479151	0.460364159
ANKS6	0.146688259	0.220350877
ANKZF1	-0.267827949	0.002044238
ANLN	-0.213705329	0.224885125
ANO10	0.040967797	0.699818874
ANO6	-0.60524996	6.04E-10
ANO7	-0.970447533	4.12E-09
ANO8	0.403733402	0.002894881
ANO9	-0.122158246	0.530320758
ANP32A	0.204211272	0.04089214
ANP32A-IT1	-1.228118474	0.078713424
ANP32B	0.362874723	2.36E-06
ANP32E	-0.03347802	0.852580882
ANPEP	1.71856639	0.390460963
ANTKMT	0.150438156	0.441404828
ANTXR1	-0.312814804	0.000163646
ANTXR2	0.272632455	0.107221011
ANXA1	0.196231076	0.143419283
ANXA11	0.065791955	0.531830817
ANXA2	0.095160272	0.208602649
ANXA2R	0.313799181	0.167935004
ANXA3	0.136146186	0.120661228
ANXA4	-0.264123074	0.002171682
ANXA5	0.095686468	0.211543913
ANXA6	0.100383546	0.389063392
ANXA7	0.192998731	0.016069994
ANXA8	0.359213156	0.006215917
ANXA8L1	0.6835279	0.017616826
ANXA9	0.254128876	0.801472331
AOC2	0.109019793	0.729209593
AOC3	0.722833947	0.340808645
AOPEP	-0.041180552	0.848567174
AOX1	0.037898107	0.766357572
AP1AR	-0.179558786	0.251366468
AP1B1	0.042986626	0.703603815
AP1G1	-0.265850897	0.009250769
AP1G2	-0.101148442	0.322010627
AP1G2-AS1	-0.758584795	4.92E-06
AP1M1	0.170229609	0.082379924
AP1M2	-0.816627392	1.78E-07
AP1S1	0.15267754	0.095101354
AP1S2	-0.390567527	0.012231844
AP1S3	-0.178123396	0.154690153
AP2A1	0.241972856	0.013772649
AP2A2	-0.182350868	0.046196749
AP2B1	-0.042474197	0.624692863
AP2M1	-0.040444564	0.717537759
AP2S1	0.128472845	0.213993062
AP3B1	0.074151945	0.4857791
AP3B2	-0.00125668	0.999346878
AP3D1	0.030058042	0.744893482
AP3M1	0.015032325	0.908500996
AP3M2	0.35240151	0.011852104
AP3S1	0.24829162	0.0270161
AP3S2	-0.006197776	0.997360808
AP4B1	0.318602962	0.009282008
AP4E1	-0.6830721	0.000153413
AP4M1	-0.384324889	3.32E-05
AP4S1	-0.311710603	0.041767983
AP5B1	-0.172492652	0.169753139
AP5M1	-0.623357192	4.01E-05
AP5S1	-0.583912119	1.48E-06
AP5Z1	-0.194417545	0.09728422
APAF1	-0.162098389	0.183138308
APBA1	0.850561681	0.260146516
APBA2	-0.056580621	0.840655767
APBA3	0.118027269	0.381755117
APBB1	0.091889374	0.44844102
APBB2	0.288408607	0.08145902
APBB3	0.03794547	0.807903891
APC	-1.456041233	0.001828524
APC2	-0.525296999	0.00060338
APEH	0.138341231	0.331225893
APEX1	-0.021937677	0.806127884
APEX2	0.075811443	0.540244771
APH1A	0.003491161	0.967241135
APH1B	-0.106715109	0.36098923
API5	-0.00645877	0.957941711
APIP	0.267821646	0.013756533
APLF	-0.158187857	0.560872014
APLN	1.026601689	2.77E-07
APLP1	0.164859661	0.206097405
APLP2	-0.111275714	0.144566667
APMAP	0.180452339	0.044516605
APOBEC3A	-0.221925245	0.8292533
APOBEC3B	0.923714329	2.10E-16
APOBEC3C	0.180841623	0.056307097
APOBEC3D	-0.226256226	0.108174467
APOBEC3F	0.167332537	0.184298423
APOBEC3G	0.424230416	0.110802614
APOBEC3H	4.055880376	0.057017602
APOBR	-0.530539888	0.575635784
APOC1	-0.208799946	0.33279803
APOD	-4.771038402	0.011832474
APOE	-0.160944673	0.813729302
APOL1	-0.107430083	0.388216865
APOL2	-0.035054313	0.776022014
APOL3	0.56685227	0.20307558
APOL6	0.499832499	4.92E-06
APOLD1	0.493682719	0.03004393
APOM	-0.142324925	0.753810427
APOO	0.610731084	0.000585952
APOOL	-0.391507858	0.030848315
APP	-0.733378633	2.85E-23
APPBP2	-0.460164629	0.001821853
APPBP2-DT	1.116955229	0.459515851
APPL1	-0.488456138	0.003459081
APPL2	0.182549547	0.117052757
APRG1	0.040833105	0.943196081
APRT	-0.327322256	0.004100258
APTR	-0.090830273	0.582652822
APTX	0.328360734	0.001046302
AQP1	0.185541733	0.75863299
AQP11	-0.499094667	0.133754265
AQP3	0.194376584	0.36361376
AQP4	-1.344182785	0.484736457
AQP6	0.799588152	0.660686857
AQP7B	-2.028704666	0.443744985
AQR	-0.179272069	0.246019517
AR	-0.623542202	0.662090586
ARAF	-0.367836151	0.000281611
ARAP1	0.310072134	0.024816669
ARAP2	-0.943179839	0.001357204
ARAP3	0.097084072	0.635754964
ARC	2.402387421	0.112978366
ARCN1	-0.002877754	0.973498949
AREG	-0.37230359	0.003259836
AREL1	-0.257369913	0.003995079
ARF1	0.14569675	0.198241904
ARF3	-0.121460076	0.132085275
ARF4	-0.132538158	0.192404969
ARF4-AS1	-0.093904937	0.890333577
ARF5	0.103842574	0.356262386
ARF6	0.00444517	0.957028041
ARFGAP1	0.105826612	0.334216841
ARFGAP2	0.02408175	0.816422294
ARFGAP3	0.060515159	0.524491743
ARFGEF1	-0.675386946	3.39E-05
ARFGEF1-DT	-0.858705405	0.587693366
ARFGEF2	-0.363420437	0.002943994
ARFGEF3	-0.036195295	0.736946799
ARFIP1	0.003614187	0.980814148
ARFIP2	-0.432635407	0.001073399
ARFRP1	0.222696554	0.056279138
ARG2	-0.573357068	0.000176016
ARGLU1	-0.229314227	0.062198052
ARHGAP1	0.064438895	0.477339293
ARHGAP10	0.08827176	0.529422832
ARHGAP11A	-0.176356256	0.360975235
ARHGAP11B	0.118239328	0.510259612
ARHGAP11B-DT	-0.037763779	0.933044607
ARHGAP12	-0.5649939	0.000735048
ARHGAP17	-0.123109274	0.325891007
ARHGAP18	-0.45057587	0.012088621
ARHGAP19	0.492186346	6.27E-05
ARHGAP21	-0.250429981	0.098243368
ARHGAP22	0.018470629	0.961462036
ARHGAP23	-0.212728979	0.026772967
ARHGAP26	-0.818451818	2.02E-08
ARHGAP27	0.100754237	0.427917277
ARHGAP29	-1.044747284	8.35E-11
ARHGAP29-AS1	0.434269007	0.672352646
ARHGAP31	-0.272759977	0.010482066
ARHGAP31-AS1	0.41701345	0.627545308
ARHGAP32	-0.378458365	0.00811996
ARHGAP33	0.445201821	0.000442414
ARHGAP35	-0.177149441	0.03014306
ARHGAP39	-0.152683471	0.124810421
ARHGAP4	0.551373675	0.341757428
ARHGAP42	-1.06302736	0.000439353
ARHGAP42-AS1	4.019804804	0.133270741
ARHGAP44	0.415937086	0.033783712
ARHGAP45	0.511166332	4.34E-05
ARHGAP5	-1.063351086	0.013571681
ARHGAP5-AS1	-0.08442801	0.805110709
ARHGDIA	0.37647401	0.001366995
ARHGDIB	0.49868268	1.89E-06
ARHGDIG	0.47296043	0.705146133
ARHGEF1	0.252285905	0.018503882
ARHGEF10	0.055759543	0.563847781
ARHGEF10L	0.347049868	0.00971247
ARHGEF11	-0.27819986	0.004489218
ARHGEF12	-0.851186923	3.44E-14
ARHGEF16	0.240253761	0.060343368
ARHGEF17	-0.104201519	0.428380985
ARHGEF17-AS1	0.009379691	0.981715927
ARHGEF18	0.181161152	0.063671512
ARHGEF19	-0.164450109	0.359673069
ARHGEF2	0.857237756	2.33E-15
ARHGEF2-AS2	0.725960053	0.180175365
ARHGEF25	-0.093256789	0.47687599
ARHGEF26	0.122766216	0.448591408
ARHGEF28	-0.590512021	6.49E-09
ARHGEF3	-0.202940571	0.167901034
ARHGEF35	-0.234782525	0.146405765
ARHGEF35-AS1	0.775617303	0.2580938
ARHGEF37	-0.56536023	0.023551207
ARHGEF39	-0.053671971	0.665463089
ARHGEF4	0.113148108	0.48273169
ARHGEF40	0.34813209	0.006375511
ARHGEF5	-0.204906231	0.032280309
ARHGEF7	-0.165053824	0.064922033
ARHGEF9	0.071378129	0.57250213
ARID1A	-0.173316743	0.050625286
ARID1B	-0.385648759	0.000214244
ARID2	-0.899064653	2.70E-06
ARID3A	0.039932405	0.683328629
ARID3B	0.165974959	0.262973097
ARID3C	-0.810200941	0.442495242
ARID4A	-0.984688066	0.000451288
ARID4B	-1.220792099	0.004011776
ARID5A	0.228196525	0.263757035
ARID5B	-0.188078732	0.691186635
ARIH1	-0.271247962	0.031202309
ARIH2	-0.163970497	0.053892687
ARIH2OS	0.547473171	0.08841955
ARL1	-0.116335415	0.214697761
ARL10	-0.54037478	0.00242747
ARL13B	-0.455069143	0.045715934
ARL14EP	-0.165607602	0.26674239
ARL14EPL	-0.477886335	0.333436689
ARL15	-1.296948737	2.14E-12
ARL16	-0.136444079	0.225304247
ARL17A	-0.825890152	0.002302459
ARL17B	-0.338878804	0.259688789
ARL2	0.046386939	0.735318225
ARL2BP	0.227206949	0.022391971
ARL3	0.167438919	0.14192849
ARL4A	0.09938208	0.501717522
ARL4C	-1.276125275	9.89E-62
ARL4D	0.546643422	0.00260206
ARL5A	-0.589639497	0.003022353
ARL5B	-0.688813901	0.004516658
ARL6	-0.435320512	0.14934283
ARL6IP1	0.448950416	1.80E-05
ARL6IP4	0.251820372	0.065324478
ARL6IP5	-0.091664836	0.422543144
ARL6IP6	0.017268864	0.872162689
ARL8A	0.331119679	0.009918467
ARL8B	0.18926635	0.087916089
ARLNC1	1.742919113	0.012731452
ARMC1	-0.033928913	0.839529432
ARMC10	0.268336361	0.002691895
ARMC12	1.802583172	0.02309653
ARMC2	-0.023028045	0.926038425
ARMC5	-0.321315462	0.035958049
ARMC6	-0.256518534	0.060829124
ARMC7	-0.359354026	0.002849094
ARMC8	-0.108368226	0.441164072
ARMC9	-0.097515558	0.426163344
ARMCX2	0.515615721	0.003448951
ARMCX3	-0.271861312	0.039477142
ARMCX5	0.166214385	0.243236256
ARMCX5-GPRASP2	0.280337394	0.532668896
ARMCX6	0.199117468	0.138441727
ARMH1	-2.01157304	0.00948136
ARMH3	-0.122763759	0.252099024
ARMH4	-0.048104537	0.846646651
ARMT1	-0.019465641	0.901890361
ARNT	-0.200200796	0.021725716
ARNT2	1.280186442	3.51E-05
ARNTL	-0.046177197	0.776690884
ARNTL2	-0.044901477	0.663200658
ARPC1A	0.365426097	9.55E-06
ARPC1B	-0.061540115	0.596949665
ARPC2	0.133521774	0.09608258
ARPC3	0.075632183	0.403952751
ARPC4	-0.018197953	0.83726611
ARPC4-TTLL3	-0.919950141	0.021289778
ARPC5	0.112794153	0.170714217
ARPC5L	0.039798507	0.691772341
ARPIN	0.360027623	0.000994878
ARPP19	-0.235410892	0.069290796
ARRB1	-0.972517053	9.93E-23
ARRB2	0.285496864	0.003684546
ARRDC1	-0.046025778	0.688687805
ARRDC1-AS1	0.162935768	0.329690267
ARRDC2	0.083324224	0.517922289
ARRDC3	-0.230508605	0.133874279
ARRDC3-AS1	0.038620459	0.956725675
ARRDC4	2.262579657	4.39E-12
ARSA	-0.437269796	0.000139808
ARSB	-0.219069979	0.116796124
ARSD	-0.629675974	9.51E-07
ARSG	1.95926315	0.001430907
ARSI	-0.449810471	0.2823263
ARSJ	-0.25331761	0.060787305
ARSK	-0.699649196	0.000259185
ARSL	-0.403213136	0.163420777
ART4	-4.449341321	0.110830633
ARTN	0.594096105	0.428711457
ARV1	-0.016067465	0.914418459
ARVCF	0.179761669	0.174041973
ARX	-0.440545226	0.407419325
ASAH1	-0.159643226	0.216205073
ASAH1-AS1	-0.243496086	0.702320998
ASAH2	0.176357827	0.688084161
ASAH2B	0.311113512	0.294548467
ASAP1	-0.330366513	0.003259525
ASAP2	-0.536449455	2.16E-08
ASAP3	0.413115145	0.006102863
ASB1	0.24989052	0.005306479
ASB12	-1.063615822	0.353364369
ASB13	0.039679251	0.726276807
ASB14	-0.006151491	0.996118259
ASB16	3.240690493	0.043638471
ASB16-AS1	-0.138573133	0.400813823
ASB2	1.084786023	0.018679869
ASB3	-0.891236616	0.284660638
ASB6	0.115607892	0.341508236
ASB7	-0.065743269	0.661089047
ASB8	-0.015358959	0.90732781
ASB9	-0.907799975	0.004801374
ASCC1	-0.078778711	0.446114246
ASCC2	0.095175219	0.387646304
ASCC3	-0.760811295	1.42E-05
ASF1A	0.236609998	0.135420713
ASF1B	0.159906013	0.196719616
ASGR1	0.217612047	0.55314409
ASH1L	-1.049923222	1.38E-10
ASH1L-AS1	-0.08243338	0.80672838
ASH2L	0.188318108	0.089589618
ASIC1	-0.244124478	0.016673582
ASIC3	0.058026263	0.866320422
ASL	0.073378833	0.510963469
ASMTL	1.183476582	0.188028301
ASNS	1.974089989	1.00E-11
ASNSD1	-0.211589745	0.178987234
ASPH	0.044954784	0.723040212
ASPHD1	-0.313581908	0.029842599
ASPHD2	-0.046869463	0.78563509
ASPM	-0.813658126	0.214095771
ASPRV1	-4.027601356	0.076669068
ASPSCR1	-0.423185479	0.012059963
ASRGL1	-0.050926646	0.721201099
ASS1	-0.050012263	0.617786513
ASTE1	-0.068303473	0.731715679
ASTN2	-0.077749169	0.635601536
ASXL1	-0.363890532	5.83E-06
ASXL2	-0.573823134	1.41E-05
ATAD1	-0.060500686	0.673108395
ATAD2	-0.473589532	0.010395075
ATAD2B	-0.649612909	0.00136848
ATAD3A	-0.005015058	0.969716302
ATAD3B	-0.327879039	0.020895825
ATAD3C	-0.278017743	0.819962676
ATAD5	-0.254140643	0.360879295
ATAT1	-0.633078384	0.228203102
ATE1	-0.673541896	6.94E-05
ATE1-AS1	2.456745127	0.247268468
ATF1	-0.448672567	0.012001315
ATF2	-0.578123786	0.000583149
ATF3	1.359709522	1.23E-18
ATF4	1.016451801	1.41E-38
ATF5	-0.506665806	6.30E-07
ATF6	0.02320714	0.798887225
ATF6-DT	-1.155754045	0.466512105
ATF6B	0.067150887	0.44321226
ATF7	-0.277225814	0.018305701
ATF7IP	-0.669521909	2.96E-06
ATF7IP2	0.280119103	0.429855089
ATG10	0.111178957	0.400308039
ATG101	0.027778651	0.856796992
ATG12	0.23261258	0.088065087
ATG13	-0.093952834	0.262467435
ATG14	-0.085165714	0.448481938
ATG16L1	-0.006629614	0.949919515
ATG16L2	0.118737325	0.378654354
ATG2A	-0.089129038	0.420990868
ATG2B	-0.603659366	0.000491954
ATG3	0.297470565	0.003705722
ATG4A	-0.02895809	0.862384559
ATG4B	0.072463245	0.470385882
ATG4C	0.169591128	0.49731588
ATG4D	0.348857507	0.028328316
ATG5	-0.085767709	0.606179427
ATG7	0.027140866	0.804974406
ATG9A	-0.186146112	0.066760894
ATG9B	1.210480571	0.24419947
ATIC	-0.016914769	0.847499272
ATL1	0.749292088	0.001596804
ATL2	0.199927568	0.216952803
ATL3	0.216332413	0.027693102
ATM	-1.281411052	0.001476139
ATMIN	-0.106928914	0.415860487
ATN1	-0.222792286	0.003975523
ATOH7	0.197037001	0.908788609
ATOX1	0.063498656	0.589332555
ATP10D	-0.510055238	0.004117513
ATP11A	-0.310076457	0.001393971
ATP11B	-0.572747754	0.002015716
ATP11B-DT	-0.620044305	0.792647086
ATP11C	-0.994551828	1.84E-08
ATP13A1	-0.331839843	0.001298792
ATP13A2	0.166045381	0.084843706
ATP13A3	-0.529424376	0.00261866
ATP13A3-DT	0.541738597	0.674259981
ATP1A1	-0.006843236	0.932353921
ATP1A1-AS1	0.051715273	0.853422275
ATP1A3	0.474731997	8.97E-06
ATP1B1	-0.189251397	0.051933299
ATP1B2	-0.937270305	0.306031415
ATP1B3	-0.328114746	0.003063798
ATP23	0.571760338	0.001263913
ATP2A1	0.204621466	0.451945872
ATP2A1-AS1	1.439503489	2.22E-06
ATP2A2	-0.108628905	0.165680805
ATP2A3	0.709422391	5.33E-05
ATP2B1	-0.726062382	0.000684124
ATP2B1-AS1	-0.61673237	0.311491584
ATP2B4	-0.102660087	0.286829768
ATP2C1	-0.195545171	0.070309179
ATP2C2-AS1	-0.024417215	0.918211464
ATP5F1A	-0.125324844	0.09603956
ATP5F1B	0.255827861	0.000814624
ATP5F1C	0.10253193	0.203884465
ATP5F1D	0.14385795	0.290768984
ATP5F1E	-0.739464975	0.004390075
ATP5IF1	0.033122387	0.716558154
ATP5MC1	-0.015490321	0.896770389
ATP5MC2	-0.06696715	0.425958437
ATP5MC3	0.055952636	0.535949597
ATP5ME	-0.176578183	0.097209684
ATP5MF	0.16777674	0.158423799
ATP5MG	-0.059115383	0.454993626
ATP5MGL	-4.016036953	0.134283915
ATP5MJ	0.070148911	0.482011066
ATP5MK	0.248302146	0.005894086
ATP5PB	0.068720084	0.456646198
ATP5PD	0.439679518	1.38E-05
ATP5PF	0.083601999	0.367457828
ATP5PO	0.212620515	0.014629906
ATP6	-0.555015942	9.86E-08
ATP6AP1	-0.290846463	0.000964943
ATP6AP2	0.075082889	0.454684858
ATP6V0A1	0.084714526	0.470182009
ATP6V0A2	-0.082834643	0.550939564
ATP6V0A4	0.379955041	0.061193061
ATP6V0B	0.16445386	0.161435051
ATP6V0C	0.017989657	0.832366399
ATP6V0D1	-0.411467274	5.02E-05
ATP6V0D1-DT	-0.293099898	0.406405331
ATP6V0E1	-0.20792554	0.034927281
ATP6V0E2	-0.053186386	0.605527467
ATP6V0E2-AS1	1.263933994	0.001084757
ATP6V1A	-0.39296195	0.000966041
ATP6V1B1	1.073586211	0.450326463
ATP6V1B1-AS1	0.243673797	0.705464729
ATP6V1B2	0.259731735	0.002582083
ATP6V1C1	-0.350882829	0.017859359
ATP6V1C2	2.24189594	0.022416415
ATP6V1D	0.30788028	0.00911669
ATP6V1E1	0.273157735	0.005098305
ATP6V1E2	0.306960908	0.12021012
ATP6V1F	0.213649402	0.025330798
ATP6V1FNB	1.319751984	0.068959584
ATP6V1G1	0.011805991	0.90051752
ATP6V1G2	2.208904807	0.03395237
ATP6V1G2-DDX39B	0.201275578	0.764108482
ATP6V1H	0.107007771	0.293651028
ATP7A	-0.413687599	0.018092443
ATP7B	-0.095988794	0.472545819
ATP8	-0.589123896	1.14E-08
ATP8A1	-0.940990559	1.33E-05
ATP8B1	-0.004573187	0.980074075
ATP8B2	-0.016412321	0.844628838
ATP8B3	0.163697998	0.125532224
ATP9A	0.688771238	2.83E-10
ATP9B	-0.179338896	0.103769776
ATPAF1	0.313934081	0.002216388
ATPAF2	0.088231363	0.565549637
ATPSCKMT	-0.0333632	0.804457755
ATR	-0.851807042	2.24E-05
ATRAID	0.287363989	0.014096066
ATRIP	0.430114056	0.618709005
ATRIP-TREX1	-0.84884768	0.358258153
ATRN	-0.042202825	0.610030405
ATRNL1	-0.091608479	0.805347649
ATRX	-1.533820477	0.003959737
ATXN1	-0.574486404	0.004154536
ATXN1-AS1	-1.564380427	0.043769736
ATXN10	-0.283680301	0.002159617
ATXN1L	-0.184169726	0.070384805
ATXN2	-0.113714612	0.308563942
ATXN2-AS	-1.268126607	0.359194694
ATXN2L	0.253301411	0.006940584
ATXN3	-0.53645243	0.006353343
ATXN7	-0.47512297	0.000240529
ATXN7L1	-0.046371839	0.771315131
ATXN7L2	-0.30288288	0.145876554
ATXN7L3	-0.473293594	6.08E-08
ATXN7L3-AS1	-0.800470766	0.190834603
ATXN7L3B	-0.021221761	0.797224588
AUH	-0.498580012	0.002354078
AUNIP	0.875782401	2.89E-07
AUP1	0.115261819	0.288147143
AURKA	0.357243428	6.66E-05
AURKAIP1	0.119032094	0.319088466
AURKB	0.550703189	1.22E-08
AURKC	-0.876528112	0.055104902
AUTS2	-0.996878264	0.425867724
AVEN	-0.410059524	0.028396205
AVIL	-0.459309452	0.538927924
AVL9	-0.108520052	0.29230988
AVPI1	0.677122864	0.011556666
AVPR1B	1.812331188	0.398112145
AVPR2	5.610955181	0.000800614
AXDND1	-0.691849931	0.483112415
AXIN1	-0.022945497	0.861708946
AXIN2	-0.763712181	0.004253529
AXL	0.553952631	1.08E-09
AZGP1	4.183779436	0.107171705
AZI2	-0.308362301	0.036573321
AZIN1	0.350245084	0.002558464
AZIN2	0.500635021	0.15220885
AZU1	-1.002948226	0.438376795
B2M	0.151628439	0.121238456
B3GALNT1	0.30429095	0.057245591
B3GALNT2	-0.295512898	0.024032027
B3GALT4	0.242652186	0.472019118
B3GALT5	0.8328435	0.017554823
B3GALT6	-0.144043228	0.189339799
B3GALT9	0.748897045	0.000184382
B3GAT2	-0.751886192	0.208324196
B3GAT3	0.172136955	0.18631413
B3GLCT	-0.125636071	0.384388995
B3GNT2	0.06022905	0.615018176
B3GNT3	1.216988354	1.13E-06
B3GNT4	-0.591575219	0.035421468
B3GNT5	-0.152614787	0.457125277
B3GNT7	0.71615	0.075159642
B3GNT9	-0.107075278	0.489515353
B3GNTL1	0.014158788	0.910668989
B4GALNT1	0.073077286	0.392680898
B4GALNT3	-0.768573635	3.10E-13
B4GALNT4	0.05377066	0.663848194
B4GALT1	0.171508674	0.036586301
B4GALT1-AS1	0.642209783	0.39297882
B4GALT2	0.069561593	0.57449797
B4GALT3	0.027413187	0.785183602
B4GALT4	0.409755033	0.000618953
B4GALT5	-0.594793513	9.46E-15
B4GALT6	-0.021566558	0.919200715
B4GALT7	0.160903011	0.332655965
B4GAT1	0.030035001	0.824397402
B9D1	0.063981291	0.56262117
B9D2	-0.496705069	0.022266682
BAAT	0.725207931	0.642545249
BABAM1	0.189170269	0.107578337
BABAM2	0.185996417	0.061468893
BABAM2-AS1	-1.129995998	0.434317349
BACE1	-0.327915463	0.043409443
BACE2	0.571939555	0.016025429
BACH1	0.118736445	0.471840488
BACH1-IT2	-2.008498553	0.323816832
BACH2	2.586088434	0.215377689
BAD	-0.145914897	0.320784519
BAG1	-0.110485544	0.254246737
BAG2	-0.220126118	0.158467023
BAG3	0.303506021	0.005893308
BAG4	-0.304505856	0.049582815
BAG5	-0.038997121	0.701816914
BAG6	-0.090365139	0.330703145
BAHCC1	-0.039156164	0.725055162
BAHD1	0.240672195	0.062200423
BAIAP2	0.284071452	0.065357675
BAIAP2-DT	-0.101186778	0.383747485
BAIAP2L1	0.157801982	0.055039866
BAIAP2L2	-1.014602074	0.298526584
BAIAP3	0.729841324	7.70E-05
BAK1	0.165949368	0.224669248
BAMBI	1.110784008	0.035789597
BANF1	0.308070902	0.000554094
BANK1	-0.85225871	0.075138667
BANP	-0.316721864	0.040804424
BAP1	-0.021379778	0.851778817
BARD1	0.248496122	0.112864446
BASP1	0.146632915	0.080099042
BASP1-AS1	-0.506696921	0.260049717
BATF2	0.766313227	0.127561822
BATF3	0.206519402	0.267415969
BAX	-0.035797458	0.74819493
BAZ1A	-1.061582335	3.72E-09
BAZ1A-AS1	-0.319993798	0.206592495
BAZ1B	-0.143987858	0.134898691
BAZ2A	-0.033496016	0.673331865
BAZ2B	-1.691195632	7.63E-05
BAZ2B-AS1	-0.466539209	0.079857587
BBC3	0.679315418	2.83E-06
BBIP1	-0.188269605	0.320989995
BBLN	-0.278270016	0.026752683
BBOF1	-0.41839838	0.084213193
BBOX1-AS1	-0.267221623	0.075290544
BBS1	-0.028165114	0.803760807
BBS10	0.339334541	0.085783864
BBS12	-0.076443387	0.75158051
BBS2	0.098266952	0.270564182
BBS4	0.162512346	0.201633283
BBS5	0.621881028	0.002133238
BBS7	-0.108026252	0.587014659
BBS9	-0.21468149	0.112390973
BBX	-0.838993987	9.32E-08
BCAM	-0.099406497	0.309480535
BCAN	1.201975055	0.134437072
BCAN-AS1	0.351372324	4.50E-05
BCAP29	-0.705263386	0.210639587
BCAP31	0.042051863	0.619570115
BCAR1	0.0515463	0.676955613
BCAR3	-0.247899735	0.007073579
BCAR3-AS1	0.142555383	0.897463713
BCAS1	-1.028941985	0.644774295
BCAS2	-0.128046835	0.450991765
BCAS3	-0.030975957	0.779491212
BCAS4	0.59678831	0.000167967
BCAT1	0.389132221	0.040563886
BCAT2	0.035132571	0.7242168
BCCIP	-0.169880091	0.277552328
BCDIN3D	-0.068899771	0.773035277
BCDIN3D-AS1	0.327769101	0.40994891
BCKDHA	-0.126420313	0.212872599
BCKDHB	-0.258312608	0.033986437
BCKDK	0.220548512	0.060634931
BCL10	0.115093765	0.31984058
BCL10-AS1	0.164491097	0.708407071
BCL11A	1.030910814	0.165944993
BCL11B	-0.557083447	0.231133467
BCL2	0.096084783	0.634029677
BCL2A1	6.019891458	0.000102756
BCL2L1	0.093605291	0.321864521
BCL2L11	-0.438361309	0.000640805
BCL2L12	0.430403002	0.001823594
BCL2L13	0.078924006	0.349954703
BCL2L15	-3.079323632	0.005026969
BCL2L2	-0.066504678	0.505419322
BCL2L2-PABPN1	-1.457640487	0.122050823
BCL3	-0.376758677	2.02E-05
BCL6	-0.568703492	0.008026771
BCL6B	0.104778547	0.911750907
BCL7A	0.191222394	0.206365437
BCL7B	-0.212372087	0.017048942
BCL7C	0.489824935	0.00015155
BCL9	-0.074129459	0.441960271
BCL9L	-0.017991253	0.848659884
BCLAF1	-0.918591725	0.007784779
BCLAF3	-0.522994873	0.017017517
BCO1	-0.43354842	0.454196999
BCO2	-1.195573575	0.319652337
BCOR	0.481487171	2.33E-07
BCORL1	-0.192076439	0.085074866
BCR	-0.176353185	0.187962824
BCS1L	0.281682395	0.028344969
BDH1	0.187280776	0.147045003
BDH2	-0.571513047	0.000485526
BDKRB2	0.931660963	0.195676322
BDNF	-0.00932148	0.959230302
BDNF-AS	-0.048542846	0.899758281
BDP1	-1.192498281	0.013416914
BEAN1	-0.863379033	1.51E-07
BECN1	0.115611111	0.204932377
BEGAIN	1.683220671	0.003265314
BEND3	0.182707107	0.322070955
BEND4	-0.485430689	0.468183175
BEND7	-0.05108053	0.701974526
BEST1	0.061202043	0.804708867
BEST3	-0.554801162	0.398327243
BEST4	-0.173403197	0.571198253
BET1	0.338470384	0.007822512
BET1L	0.073542756	0.425992639
BEX2	-0.221531974	0.816793423
BEX3	-0.104212295	0.242187839
BEX5	0.385256468	0.033685413
BFAR	0.171143819	0.055784851
BFSP1	-0.750386674	0.069856026
BGN	-0.134779839	0.921102401
BHLHA15	0.443874466	0.09159006
BHLHE40	-0.324319765	4.68E-05
BHLHE40-AS1	-1.006630872	0.013430467
BHLHE41	-0.90555376	2.06E-13
BICC1	-0.976346435	2.76E-12
BICD1	-0.977646571	6.50E-15
BICD2	0.115798325	0.334094256
BICDL1	0.126120274	0.694332388
BICDL2	4.058370047	0.018307714
BICRA	-0.086811815	0.45120366
BICRAL	-0.29550648	0.020589417
BID	-0.180640516	0.122375113
BIK	0.387449239	0.040687766
BIN1	0.041084478	0.766029059
BIN3	0.094447318	0.477383137
BIRC2	-0.941452078	4.53E-07
BIRC3	-1.425408976	7.06E-05
BIRC5	0.315937864	6.03E-05
BIRC6	-0.789088798	1.50E-05
BIRC7	-1.737790071	0.360168447
BISPR	-0.236691664	0.890892247
BIVM	-0.340819715	0.12001979
BLACAT1	-0.173056921	0.688377097
BLCAP	-0.170984827	0.040492625
BLK	3.861241619	0.162131102
BLM	-0.231282148	0.19889095
BLMH	0.236879165	0.01768682
BLOC1S1	0.393104311	0.216200368
BLOC1S2	0.021802795	0.884309359
BLOC1S3	0.173200596	0.226645723
BLOC1S4	0.141840062	0.361986812
BLOC1S6	-0.089486751	0.588241533
BLVRA	0.47781691	0.000457196
BLVRB	0.747755827	5.60E-09
BLZF1	-0.361261627	0.11109925
BMERB1	0.340654145	0.034886435
BMF	-0.275889654	0.004438606
BMI1	-0.010825416	0.975571433
BMP1	-0.209657172	0.091669288
BMP2K	-0.775557917	1.59E-06
BMP3	-0.111600788	0.9262871
BMP6	-0.011752784	0.984366258
BMP8A	1.016026182	0.108598768
BMP8B	0.37504278	0.166598221
BMPER	0.042699898	0.873189584
BMPR1A	-0.226123696	0.077534492
BMPR1B	-2.127868864	0.009021187
BMPR2	-1.308843355	5.05E-14
BMS1	-0.086063612	0.509662442
BMT2	-0.848759973	1.11E-05
BNC1	0.17856048	0.145746444
BNIP1	0.22835289	0.113214723
BNIP2	-0.21181968	0.174838696
BNIP3	0.298556993	0.00010365
BNIP3L	0.002271927	0.985187118
BNIPL	-0.129677914	0.862552427
BOC	0.643818303	0.64467646
BOD1	0.400772944	6.91E-05
BOD1L1	-0.889665312	0.032697817
BOK	-0.10255912	0.404670557
BOK-AS1	-0.091530022	0.915906915
BOLA1	0.198210617	0.39749061
BOLA2-SMG1P6	0.600752396	0.050468836
BOLA2B	-0.299999031	0.731940391
BOLA3	0.386490642	0.010499015
BOLA3-DT	-0.06991441	0.750091153
BOP1	-0.093080257	0.501974136
BORA	0.337483069	0.035122631
BORCS5	0.345417842	0.035846291
BORCS6	-0.035162072	0.822662387
BORCS7	-0.679068883	0.011189625
BORCS8	-0.138022951	0.5201537
BPGM	0.11511231	0.356921881
BPHL	-0.237644014	0.062756173
BPNT1	-0.288776837	0.01225708
BPNT2	-0.219130042	0.048531965
BPTF	-0.994965226	4.07E-09
BRAF	-0.613674663	0.000691353
BRAP	-0.1420839	0.270093728
BRAT1	-0.077572167	0.584465174
BRCA1	-0.232967024	0.184027424
BRCA2	-0.382193659	0.289986074
BRCC3	-0.662720903	0.000181426
BRD1	-0.347658375	0.002990323
BRD2	-0.170676471	0.021300964
BRD3	-0.13015311	0.180023655
BRD3OS	-0.156549327	0.152996635
BRD4	-0.115694016	0.183503877
BRD7	-0.001380408	0.988593624
BRD8	-0.140222735	0.100441901
BRD9	0.23164229	0.025994139
BRF1	-0.076657998	0.599922229
BRF2	0.720505441	5.42E-05
BRI3	0.271582838	0.005739155
BRI3BP	0.022876636	0.830481435
BRICD5	0.250025315	0.4958527
BRINP3-DT	3.848027507	0.222173034
BRIP1	-0.580336872	0.17157959
BRIX1	0.057987197	0.735434868
BRK1	-0.126594375	0.095683379
BRME1	0.069078871	0.911233196
BRMS1	0.054347526	0.689604503
BRMS1L	-0.263023927	0.08780533
BROX	-0.475398546	0.008789783
BRPF1	0.003632888	0.973013027
BRPF3	-0.608394351	4.48E-12
BRPF3-AS1	1.185826993	0.167272088
BRSK1	0.537159659	1.15E-05
BRSK2	-0.164072019	0.22868962
BRWD1	-0.841298214	0.032410482
BRWD1-AS2	-0.743793766	0.397371292
BRWD3	-0.982541262	5.56E-06
BSCL2	-0.062287153	0.903880418
BSDC1	-0.145448451	0.086833147
BSG	0.277107837	0.016541496
BSG-AS1	0.307999674	0.120985475
BSN	0.944546235	0.053259903
BSN-DT	2.065218695	0.153181437
BSPRY	0.503757621	0.300572567
BST1	0.730857476	0.641493292
BST2	3.073557145	0.012601423
BTAF1	-0.368452095	0.03594959
BTBD1	-0.085740644	0.497105656
BTBD10	0.213016409	0.066234807
BTBD16	-1.161995121	0.026250647
BTBD19	-1.1277024	0.004155764
BTBD2	0.024276874	0.831246818
BTBD3	0.132724076	0.263572941
BTBD6	-0.264733999	0.009607934
BTBD7	-0.617755165	4.44E-07
BTBD8	-0.545502924	0.067878285
BTBD9	-0.481523261	3.76E-05
BTC	-1.054768966	2.17E-05
BTD	-0.513414117	1.18E-05
BTF3	0.266104817	0.002313777
BTF3L4	0.390360438	0.000216563
BTG1	-0.142964348	0.086524834
BTG1-DT	-1.05158977	0.304184605
BTG2	0.321559139	0.159275211
BTG3	0.339945465	0.007740741
BTG3-AS1	-1.008195894	0.041384658
BTN2A1	0.025288538	0.813761622
BTN2A2	-0.088102875	0.406691202
BTN3A1	0.007984734	0.946368203
BTN3A2	-0.012536715	0.91573151
BTN3A3	-0.812780963	6.47E-05
BTNL9	-0.56418851	0.217266822
BTRC	-0.094257475	0.413127692
BUB1	0.669511933	3.02E-11
BUB1B	0.25674072	0.030392533
BUB3	0.077071182	0.478388786
BUD13	0.156871902	0.176759456
BUD23	0.157312748	0.163114636
BUD31	0.409871101	7.06E-06
BYSL	0.017023432	0.894497977
BZW1	0.302617427	0.006070206
BZW2	0.140701606	0.102776513
C10orf143	-0.329728015	0.828485828
C10orf55	-0.154143443	0.367300839
C10orf88	0.075089439	0.685096591
C10orf95	1.957975638	0.021515422
C10orf95-AS1	-0.045902783	0.766291928
C11orf1	0.757202071	5.66E-05
C11orf24	0.205444527	0.041928792
C11orf49	-0.032817991	0.735756374
C11orf54	-0.469156994	0.001209158
C11orf58	0.139620905	0.174245469
C11orf65	0.989636728	0.094824529
C11orf68	0.288306174	0.053452253
C11orf71	0.06222993	0.738080485
C11orf80	0.041544807	0.683896825
C11orf86	1.234521196	0.178485279
C11orf91	0.794406788	0.035706601
C11orf94	-0.90899018	0.194008135
C11orf96	0.893187089	0.200690773
C11orf98	-0.154737464	0.863933812
C12orf29	0.038798543	0.829782385
C12orf4	0.16180488	0.306296319
C12orf43	-0.078157974	0.567866448
C12orf57	0.057755289	0.681554864
C12orf60	0.285297542	0.536590511
C12orf73	-0.028405451	0.887785656
C12orf75	0.469602174	5.72E-07
C12orf75-AS1	-1.835255319	0.041531382
C12orf76	0.111405983	0.617133786
C13orf46	0.093249501	0.665135393
C14orf119	-0.094316909	0.351248458
C14orf132	-0.388676489	0.000251501
C14orf178	-0.657509666	0.763821975
C14orf28	0.00640627	0.977413942
C14orf93	0.257093227	0.075065972
C15orf39	-0.015041597	0.928118817
C15orf40	-0.231656667	0.0817172
C15orf48	-0.287304407	0.001619439
C15orf61	0.183775498	0.490174647
C15orf62	-1.595878049	9.37E-26
C15orf65	-0.157716798	0.626296001
C16orf46	-0.361601339	0.13824324
C16orf72	-0.02782842	0.801550943
C16orf74	1.068815523	7.61E-09
C16orf86	-0.03890483	0.919921376
C16orf87	-0.030417097	0.881009617
C16orf91	0.143969762	0.384158712
C16orf95	0.564767419	0.107123761
C16orf95-DT	1.236424314	0.119924959
C17orf100	-0.089494502	0.666723128
C17orf107	0.391059513	0.395654267
C17orf113	0.019659659	0.910774124
C17orf114	-0.524302965	0.513160697
C17orf58	0.156105709	0.275310685
C17orf67	-0.160887702	0.511599927
C17orf75	0.496501983	0.000944279
C17orf80	-0.093256427	0.429623875
C17orf97	0.151271589	0.567738651
C18orf21	0.130944734	0.384530993
C18orf25	0.110455309	0.329490173
C18orf32	0.216989993	0.5028893
C18orf54	-0.462596511	0.031259691
C19orf12	-0.02588784	0.797508422
C19orf18	-0.27546271	0.699343469
C19orf25	-0.127316243	0.377071641
C19orf33	0.479436658	0.000768831
C19orf44	-0.178435121	0.291093545
C19orf47	0.312425942	0.022050595
C19orf53	0.163170763	0.239540951
C19orf54	0.037794689	0.77957354
C19orf71	0.448943574	0.252885566
C19orf73	0.154477537	0.788582386
C1D	-0.151953243	0.335237403
C1GALT1	-0.277158581	0.160063662
C1GALT1C1	0.005698292	0.961602747
C1GALT1C1L	0.368381631	0.143733024
C1QBP	0.220891135	0.082056189
C1QL1	-0.071348993	0.65530683
C1QL4	0.395891428	0.019322124
C1QTNF1	0.177400945	0.226042276
C1QTNF12	-0.124650933	0.886340623
C1QTNF2	-2.814241501	0.166278533
C1QTNF3	-0.741960636	0.338885235
C1QTNF6	-0.270452564	0.457152725
C1QTNF8	-0.162037297	0.890465617
C1R	-0.064553255	0.575647574
C1RL	-0.71552781	1.62E-15
C1RL-AS1	-0.201996412	0.06109322
C1S	-0.291378609	0.015342589
C1orf109	0.225125334	0.071009565
C1orf112	0.399028581	0.007215711
C1orf115	0.377726783	0.000133157
C1orf116	0.368115685	0.824871219
C1orf122	-0.232397376	0.125548675
C1orf131	0.010429579	0.947553082
C1orf159	-0.075314992	0.618868492
C1orf162	-0.299032131	0.299905285
C1orf167	2.886680257	0.187055654
C1orf174	0.15316615	0.14217462
C1orf198	0.313442135	0.001747591
C1orf21	2.104922741	6.60E-07
C1orf210	3.657744925	0.20408055
C1orf216	-0.440700479	2.74E-06
C1orf220	0.399378644	0.513422199
C1orf226	-0.356832507	0.074665388
C1orf35	0.288141432	0.011683913
C1orf43	0.100341366	0.234975318
C1orf50	-0.200328976	0.168005363
C1orf52	-0.07804812	0.586884516
C1orf53	0.812981224	0.104710657
C1orf54	-0.587611364	0.642692614
C1orf56	0.125738325	0.590058291
C1orf74	0.623689595	0.000473986
C2	1.033499499	0.312567938
C20orf144	-1.67360136	0.311999424
C20orf204	1.927269954	0.000118364
C20orf27	0.113663962	0.321792007
C20orf96	0.285469347	0.00933585
C21orf58	0.00767181	0.955983986
C21orf62-AS1	-1.000082094	0.356408131
C21orf91	-0.619901125	0.005278808
C22orf23	-0.120175891	0.798801034
C22orf39	0.064484233	0.598157343
C2CD2	0.094016215	0.39356984
C2CD2L	-0.155405651	0.275928744
C2CD3	-0.226916361	0.037527138
C2CD4A	-0.160051631	0.887839632
C2CD4C	-0.11705762	0.396449837
C2CD5	-0.604025559	0.000126339
C2CD6	1.127684236	0.363054592
C2orf15	-0.312362275	0.205186362
C2orf27A	-0.406748834	0.090534213
C2orf42	-0.147160462	0.453078476
C2orf49	-0.086536168	0.546620967
C2orf49-DT	-0.362176842	0.240704148
C2orf50	-0.801737264	0.195845027
C2orf68	-0.145352313	0.171039021
C2orf69	-0.025466899	0.891046928
C2orf72	1.216611368	0.064297374
C2orf74	-0.173502128	0.380124924
C2orf74-DT	0.057755686	0.680954125
C2orf76	-0.433391863	0.040944129
C2orf81	0.292062943	0.13637429
C2orf88	0.343126923	0.359051626
C2orf92	-0.727004074	0.092014697
C3	-0.8916389	1.10E-22
C3AR1	3.653739128	0.19675498
C3orf14	0.753397259	4.36E-08
C3orf18	0.351721155	0.006697256
C3orf20	-0.637365155	0.1651219
C3orf33	0.369617109	0.09405276
C3orf38	0.283215415	0.033754734
C3orf52	-0.112040557	0.51790571
C3orf62	-0.400863733	0.003659987
C3orf80	0.332245102	0.46185952
C4A	0.831691533	0.221270075
C4B	1.194004307	0.19975004
C4orf19	1.390340685	0.20820022
C4orf3	-0.09646757	0.300046358
C4orf33	-0.133214884	0.538965777
C4orf36	-0.458047684	0.609255188
C4orf46	0.397138931	0.008714026
C4orf47	0.098528769	0.724111468
C4orf48	-0.10057121	0.423847204
C4orf54	-4.19573189	0.060712472
C5	-0.052116389	0.881249437
C5AR1	1.665082003	0.042353797
C5AR2	1.796266468	0.378719433
C5orf15	-0.391767702	0.000534406
C5orf22	0.162216076	0.223488454
C5orf24	-0.459531002	0.000310312
C5orf34	0.463034914	0.00815294
C5orf34-AS1	-0.734580428	0.187011327
C5orf38	-0.200448795	0.362874866
C5orf49	1.900566999	0.03994771
C5orf63	-0.548962827	0.033169283
C6orf120	-0.10605224	0.377887313
C6orf132	1.023837185	1.37E-06
C6orf136	-0.125408302	0.407480874
C6orf141	1.445970165	0.00018953
C6orf163	-0.806498878	0.212061119
C6orf223	0.369458989	0.771867681
C6orf226	0.392081707	0.075855321
C6orf47	0.130687658	0.359420525
C6orf52	1.15916353	0.10615366
C6orf58	0.049864423	0.932644801
C6orf62	-0.182423439	0.065192542
C6orf89	-0.037539436	0.674248279
C7orf25	0.347277207	0.002994513
C7orf26	-0.043784293	0.71234629
C7orf31	0.035675667	0.834040095
C7orf50	0.905168387	1.16E-11
C7orf57	1.854136954	0.000717182
C8G	0.476994375	0.672977737
C8orf33	0.05814388	0.609750612
C8orf34	1.272766519	0.29237988
C8orf44	-0.135964301	0.662619123
C8orf48	0.191875616	0.527522074
C8orf58	-0.228458333	0.097528108
C8orf76	0.207948443	0.654979263
C8orf82	-0.463837688	0.00286294
C9orf116	0.075910793	0.76775306
C9orf163	-0.703178227	0.445683899
C9orf24	0.173442804	0.781938859
C9orf40	0.457673814	0.001467371
C9orf43	0.612631079	0.414507711
C9orf50	2.818507533	0.159397281
C9orf64	0.34296742	0.00481474
C9orf72	0.319910213	0.134954095
C9orf78	0.072131643	0.470414165
C9orf85	0.076470918	0.654870844
CA10	-0.509104081	0.004842817
CA11	-0.247745298	0.054665288
CA12	0.538418071	0.389414357
CA13	0.021770995	0.893909223
CA14	1.370890297	0.208507183
CA2	-0.749863843	0.029134131
CA3	-0.405180845	0.622254167
CA5BP1-CA5B	-0.516262008	0.170235529
CA8	-0.552147445	0.521631501
CA9	1.26788059	0.000263357
CAAP1	0.068684115	0.598417878
CAB39	-0.09954112	0.324255112
CAB39L	-0.585294497	0.003372668
CABIN1	0.106762827	0.318979259
CABLES1	0.105232937	0.753875655
CABLES2	0.500235203	2.27E-05
CABP1	0.345555213	0.86501633
CABP1-DT	0.636220937	0.591816404
CABP7	-0.002818242	0.998327423
CABYR	-0.154563883	0.306777402
CACFD1	-0.121703143	0.436310558
CACHD1	-0.212942035	0.188693727
CACNA1G	0.193692287	0.690247493
CACNA1H	-0.122336653	0.889867564
CACNA2D1	-0.739020464	0.1762917
CACNA2D2	0.612127044	0.080285432
CACNA2D3	-0.35454545	0.389123019
CACNB1	0.219854302	0.112832673
CACNB3	-0.077772173	0.488971432
CACNB4	-1.138101889	0.000390328
CACNG6	0.022167614	0.972069793
CACNG7	0.349244002	0.000719715
CACNG8	-0.316548048	0.122150417
CACTIN	0.13208178	0.428701059
CACTIN-AS1	-0.078787657	0.838177196
CACUL1	-0.101600225	0.316527658
CACYBP	0.332417878	0.000371748
CAD	-0.144372854	0.250644005
CADM1	0.990555448	0.366708352
CADM2	1.44530239	0.34872059
CADM4	-0.224816924	0.065146569
CADPS2	-0.470478809	0.000272495
CAGE1	0.685418257	0.642940619
CAHM	0.231555254	0.798907076
CALB2	0.827436674	0.343654755
CALCOCO1	-0.139668077	0.180830454
CALCOCO2	0.267561655	0.028584517
CALCR	-0.503092178	0.641045516
CALCRL	-0.838762041	0.478227715
CALCRL-AS1	2.648418075	0.08461024
CALD1	-0.413716787	0.001065793
CALHM2	-0.670636934	0.219165473
CALHM5	1.020397057	0.209798693
CALM1	0.164301063	0.082315243
CALM2	0.164383961	0.094733987
CALM3	0.189742294	0.011632224
CALML4	0.143757146	0.487393923
CALML6	-0.282613607	0.741213032
CALR	0.328541977	0.000194106
CALU	0.208739119	0.022533882
CAMK1	-0.238458618	0.073500792
CAMK1D	-0.074502774	0.690262428
CAMK2B	1.659457843	0.072276714
CAMK2D	0.19160564	0.150258131
CAMK2G	0.086678166	0.432174445
CAMK2N1	0.687580263	0.000999511
CAMK2N2	0.330464686	0.027683886
CAMK4	-0.552401996	0.011326197
CAMKK1	0.460432072	0.000387284
CAMKK2	0.161296971	0.128019876
CAMKMT	-0.176975395	0.407144043
CAMKV	-0.130988754	0.750875997
CAMLG	0.399711369	5.46E-05
CAMP	-0.898025663	0.419526168
CAMSAP1	-0.019459259	0.823057292
CAMSAP1-DT	0.684120587	0.000975671
CAMSAP2	-0.960560099	1.98E-08
CAMSAP3	0.155427454	0.306465998
CAMTA1	-0.069062124	0.500075193
CAMTA1-DT	1.691315805	0.271412797
CAMTA2	0.095727663	0.291553627
CAMTA2-AS1	-0.004737017	0.976131537
CAND1	-0.245593641	0.069881274
CAND1.11	-0.68780253	0.268823334
CAND2	0.073690224	0.543195601
CANT1	0.377622453	0.000305311
CANX	0.136659885	0.138687215
CAP1	0.339435293	7.18E-06
CAP2	-0.520664197	5.33E-06
CAPG	0.506883362	2.25E-06
CAPN1	-0.079221631	0.532690688
CAPN10	0.117871839	0.314594607
CAPN10-DT	-0.521229097	0.056476453
CAPN12	0.145517663	0.718659187
CAPN14	0.159023201	0.666332313
CAPN15	-0.216973727	0.043375436
CAPN2	0.154690141	0.050011437
CAPN3	-3.455343736	0.027032093
CAPN5	0.798539657	1.14E-11
CAPN7	-0.298987922	0.042537212
CAPNS1	0.018522913	0.864698445
CAPRIN1	0.014200671	0.878428082
CAPRIN2	-0.239774484	0.0740727
CAPS	-0.405880151	0.366202694
CAPS2	-0.800362481	0.040447208
CAPSL	0.525013995	0.235247187
CAPZA1	0.025637556	0.850997673
CAPZA2	-0.024222794	0.860433313
CAPZB	0.04088045	0.596592588
CARD10	-0.157584095	0.22392046
CARD19	0.47670817	0.00266731
CARD6	-0.395072237	0.435357435
CARD8	-0.140027361	0.293012411
CARD8-AS1	-0.620431586	0.081071449
CARD9	-2.585308705	0.163128713
CARF	-0.632661855	0.028793052
CARHSP1	0.121536876	0.243775816
CARM1	0.177183547	0.119325375
CARMIL1	-0.422098744	5.53E-05
CARMIL2	0.128338561	0.545906266
CARMIL3	1.234664493	0.039740437
CARNMT1	-0.451046219	0.052457331
CARNS1	-0.087484477	0.880541398
CARS1	1.209369226	5.59E-44
CARS2	0.224542673	0.089958956
CASC11	0.79585522	0.433822497
CASC15	1.247166791	0.409418907
CASC19	-0.678350629	1.68E-05
CASC2	0.900535621	0.01510829
CASC3	0.181859405	0.032727745
CASC8	0.078328088	0.693430976
CASC9	-0.161249194	0.831476935
CASD1	-0.713202312	4.41E-05
CASK	-0.242029647	0.028600874
CASKIN1	0.025450353	0.903879489
CASKIN2	-0.054580156	0.75572398
CASP1	0.279636976	0.296286712
CASP10	-0.493855119	0.047682173
CASP2	-0.054187819	0.571793494
CASP3	-0.288435328	0.05800231
CASP4	0.229308738	0.069702252
CASP6	0.392464461	0.003916681
CASP7	0.160583987	0.232547524
CASP8	0.147508945	0.086995942
CASP8AP2	-1.039687264	0.026359926
CASP9	0.244170561	0.086327477
CASS4	-1.014523425	0.683696954
CAST	-0.078425466	0.403018242
CASTOR1	-0.344818853	0.068621509
CASTOR2	-0.8184599	2.48E-11
CASZ1	0.435667708	0.00260168
CAT	0.294595461	0.000921238
CATIP	0.657807033	0.73295892
CATIP-AS1	0.21941687	0.768901304
CATSPER1	0.977355332	0.000352613
CATSPER2	0.023026446	0.944549608
CATSPER3	-0.701617051	0.324565233
CATSPERB	-2.90258928	0.292725411
CATSPERE	-1.071127101	0.142602419
CATSPERG	0.126366489	0.744776617
CAV1	-0.362558258	0.00059026
CAV2	-0.261512727	0.016871836
CAVIN1	-0.082768176	0.441704058
CAVIN4	-0.865054137	0.03408259
CBARP	0.396744892	0.017084908
CBFA2T2	-0.056894485	0.526294408
CBFB	0.160220074	0.100188972
CBL	-0.147517663	0.09505662
CBLB	-0.218234854	0.192562517
CBLL1	-0.106510639	0.419902791
CBLL1-AS1	-0.182269723	0.609817567
CBLN2	-0.532475311	0.309097973
CBLN3	-0.376063535	0.509548907
CBR1	0.168603887	0.171430895
CBR3	0.701027065	8.76E-07
CBR3-AS1	0.13477935	0.749950859
CBR4	-0.199771805	0.261344104
CBS	-0.528928497	0.014774465
CBWD1	0.213247691	0.295289118
CBWD2	-0.375410736	0.009806602
CBWD3	0.94702505	0.03776807
CBWD5	-0.022253507	0.893595435
CBWD6	-0.169957354	0.514771117
CBX1	0.228802592	0.006653056
CBX2	0.198911693	0.1124971
CBX3	-0.168212859	0.234297342
CBX4	0.08666353	0.441867731
CBX5	-0.320461051	0.008184319
CBX6	0.146791311	0.121417178
CBX7	0.386192358	0.000111021
CBX8	-0.296745276	0.047990215
CBY1	0.144916475	0.254716769
CBY2	0.659652597	0.691855932
CC2D1A	0.037916778	0.789134641
CC2D1B	-0.117129608	0.279768148
CC2D2A	-0.658486649	2.23E-06
CCAR1	-0.975696331	1.49E-06
CCAR2	0.075226649	0.470407021
CCAT1	-0.826302851	7.83E-15
CCBE1	0.625041992	0.000372469
CCDC102A	-0.118127366	0.506819455
CCDC102B	0.476550782	0.404138122
CCDC103	-0.035896831	0.887407761
CCDC106	0.002690302	0.982549055
CCDC107	0.128256663	0.356705473
CCDC110	0.251716595	0.838729269
CCDC112	-0.024350926	0.93307691
CCDC113	0.673059185	4.90E-06
CCDC115	0.206535234	0.039368869
CCDC116	0.087389452	0.87396353
CCDC117	-0.081689773	0.518364357
CCDC12	-0.055371443	0.631535562
CCDC120	-0.130797539	0.250235234
CCDC121	-0.192258887	0.537646152
CCDC122	-0.157451523	0.52873833
CCDC124	0.301817423	0.040629427
CCDC125	0.042032339	0.754131913
CCDC126	0.414803687	0.09072907
CCDC127	-0.163814153	0.097252741
CCDC13	0.911371977	0.42158613
CCDC134	-0.206076869	0.04406114
CCDC136	-0.266576852	0.08560677
CCDC137	0.143419924	0.26041476
CCDC138	-0.413994345	0.109886005
CCDC14	-0.630777224	0.005831415
CCDC142	-0.425307574	0.000987436
CCDC146	-1.351456571	0.002135162
CCDC148	-0.358379074	0.492641718
CCDC149	0.037442308	0.900201627
CCDC15	0.664153938	0.024737721
CCDC15-DT	1.040661066	0.148839333
CCDC150	-0.254167478	0.390954553
CCDC153	-1.001556958	0.018364627
CCDC157	-0.476845756	0.048968558
CCDC159	-0.480605019	0.16810649
CCDC160	2.69521265	0.240595554
CCDC163	0.198890501	0.324033742
CCDC167	0.075551219	0.641475982
CCDC169	0.381379678	0.674642695
CCDC17	0.269339809	0.39093871
CCDC171	-0.13381423	0.647335642
CCDC174	0.00749169	0.955942919
CCDC18	-0.596447799	0.037799118
CCDC18-AS1	-0.086527139	0.683376851
CCDC183	-0.645498607	0.030712167
CCDC183-AS1	-1.993278604	1.26E-16
CCDC184	0.779038866	0.003101475
CCDC186	-1.045135021	0.050445067
CCDC187	-0.681449061	0.689234151
CCDC191	-0.351363209	0.104083309
CCDC198	-1.643987128	3.18E-06
CCDC22	0.082755604	0.560230705
CCDC24	0.067816335	0.601942929
CCDC25	-0.049584102	0.726366268
CCDC28A	0.170704042	0.181003125
CCDC28A-AS1	0.67829824	0.45216186
CCDC28B	-0.149052743	0.401462301
CCDC3	-1.277716674	0.247184041
CCDC30	-0.602311243	0.278170464
CCDC32	-0.151114501	0.272022089
CCDC34	0.483979134	0.001334002
CCDC40	0.314088827	0.332223846
CCDC43	0.042047448	0.766383436
CCDC47	-0.150172416	0.206774397
CCDC50	-0.020674972	0.853492477
CCDC51	0.181145204	0.249432547
CCDC57	-0.244475083	0.026619996
CCDC59	0.242083674	0.122817794
CCDC6	0.044042795	0.683243866
CCDC61	0.037579693	0.813214626
CCDC62	0.214736428	0.901030163
CCDC66	-0.624482154	0.006459657
CCDC68	-0.020239561	0.933465976
CCDC69	0.023972553	0.842386511
CCDC7	0.146240968	0.77687225
CCDC71	0.21302459	0.122168638
CCDC71L	0.644828066	6.58E-05
CCDC74A	0.783207671	2.72E-05
CCDC74B	1.138073384	4.80E-07
CCDC77	0.069725164	0.68243679
CCDC78	0.531406468	0.117560164
CCDC80	0.652968005	0.016351332
CCDC81	-1.929708708	0.045666546
CCDC82	-0.640845214	0.008207964
CCDC85A	0.597816207	0.371467723
CCDC85B	0.825069969	1.49E-08
CCDC85C	0.33924765	0.001754774
CCDC86	-0.003901934	0.972955971
CCDC87	0.045587794	0.922818367
CCDC88A	-0.876045472	0.140149772
CCDC88B	0.254788848	0.156815264
CCDC88C	-0.075760288	0.557683134
CCDC88C-DT	2.706952711	0.286788493
CCDC9	0.177579195	0.144190649
CCDC90B	0.223676922	0.059829801
CCDC91	-0.405446155	0.076598996
CCDC92	-1.417730275	4.09E-12
CCDC92B	1.604045313	0.031075836
CCDC93	-0.196718754	0.060531178
CCDC96	0.489475344	0.200594048
CCDC97	-0.218245619	0.078915188
CCDC9B	-0.185778067	0.026099811
CCER2	-0.43403057	0.523200313
CCHCR1	0.292246396	0.015348262
CCIN	1.257173085	0.166935732
CCL2	-1.222664044	5.39E-16
CCL20	1.075590032	1.35E-14
CCL24	0.98310438	0.612266803
CCL27	-0.343894813	0.700718864
CCL28	-0.297213132	0.050271849
CCL5	1.544025278	0.096359812
CCM2	0.100605065	0.357802629
CCM2L	1.407018346	0.164483605
CCN1	0.422530283	2.61E-06
CCN2	0.451641034	7.34E-05
CCN3	0.576229856	0.168024144
CCN5	-0.864698304	0.620687635
CCNA1	0.908828318	4.63E-14
CCNA2	0.402948847	0.000133122
CCNB1	0.478721988	1.30E-07
CCNB1IP1	0.297439481	0.003363025
CCNB2	0.533183798	7.29E-11
CCNB3	-0.088633246	0.842518886
CCNC	0.252013484	0.028520628
CCND1	0.216239826	0.002956974
CCND2	2.330783413	1.04E-19
CCND3	0.20417131	0.125414969
CCNDBP1	0.045776164	0.657413041
CCNE1	0.244483106	0.022564351
CCNE2	-0.31804771	0.059632212
CCNF	0.422030155	0.001127151
CCNG1	-0.090412197	0.453365438
CCNG2	0.106676996	0.342707577
CCNH	0.110595162	0.478549552
CCNI	0.02314011	0.773503728
CCNI2	-0.083481402	0.90627237
CCNJ	-0.031449051	0.85191702
CCNJL	-0.349755185	0.007246753
CCNK	0.075174122	0.380864146
CCNL1	-0.485694346	0.004301
CCNL2	-0.442311798	1.61E-05
CCNO	-0.004138211	0.985491481
CCNQ	0.218308839	0.168947232
CCNT1	-0.074315959	0.550130389
CCNT2	-0.661710006	0.000782929
CCNT2-AS1	-1.428528386	0.013003868
CCNY	-0.067271964	0.493122421
CCNYL1	0.054601028	0.608760876
CCP110	-0.341934488	0.123545686
CCPG1	-0.579662911	0.049849217
CCR10	0.021850448	0.974703121
CCS	-0.177254843	0.1913518
CCSAP	-0.154607839	0.352795798
CCSER1	1.266543507	0.315588198
CCSER2	-0.924851883	3.37E-06
CCT2	0.140680039	0.098965919
CCT3	0.014169629	0.880261278
CCT4	0.355033578	1.39E-05
CCT5	0.254862759	0.000788483
CCT6A	0.207239624	0.019226802
CCT6B	-0.675778247	0.476812942
CCT7	0.250107932	0.010979713
CCT8	0.40483062	3.68E-05
CCZ1	-0.2809988	0.139586881
CCZ1B	0.339896257	0.008768807
CD101-AS1	0.209548291	0.753801674
CD109	-0.259007879	0.042270065
CD109-AS1	-0.093842596	0.852513355
CD14	-0.465032553	0.111976938
CD151	-0.190356131	0.105023893
CD163L1	0.17212528	0.085316361
CD164	-0.237876227	0.039194532
CD177	0.235222121	0.836841422
CD207	0.703314019	0.624750785
CD22	3.799999736	0.000622036
CD226	-0.146640026	0.928695386
CD24	0.160738501	0.590841716
[truncated: 15,038 more rows]
