# Supplementary material for: Peptide-based Self-adaptive Implant Coating Sequentially Regulates Bone Regeneration to Enhance Interfacial Osseointegration
Source: Research Square preprint supplement (doi:10.21203/rs.3.rs-5132912/v1), 2024-10-01
Supplement: Supplementary file 589 [file S-vs-C_heatmap-coefficient_matrix.xls]

S1	S2	S3	C1	C2	C3
S1	1	0.997724546109616	0.996890434140252	0.976358742460774	0.975280428151812	0.940671811390697
S2	0.997724546109616	1	0.999316513832216	0.96883878613811	0.967053473034366	0.928184720475358
S3	0.996890434140252	0.999316513832216	1	0.964487888182038	0.962956572419453	0.92059888836236
C1	0.976358742460774	0.96883878613811	0.964487888182038	1	0.999567097422499	0.987365731137301
C2	0.975280428151812	0.967053473034366	0.962956572419453	0.999567097422499	1	0.987099302973591
C3	0.940671811390697	0.928184720475358	0.92059888836236	0.987365731137301	0.987099302973591	1
