# Supplementary material for: Peptide-based Self-adaptive Implant Coating Sequentially Regulates Bone Regeneration to Enhance Interfacial Osseointegration
Source: Research Square preprint supplement (doi:10.21203/rs.3.rs-5132912/v1), 2024-10-01
Supplement: Supplementary file 593 [file S-vs-C_report.FPKM.xls]

sample	Min	1st_Qu	Median	Mean	3rd_Qu	Max	Sd	Sum
S1	0	0	0.00454975502614472	12.543950879926	2.66027191735201	10577.6045458879	147.460058364446	431700.069532652
S2	0	0	0.0059280524406914	12.3951288777953	2.78132279087781	9170.82691889778	138.036469049336	426578.360329325
S3	0	0	0.00389283825108217	12.5250146804777	2.65948734271529	8971.5135276328	139.374675468768	431048.38022864
C1	0	0	0.00424287509904945	12.3530166441962	2.73109686593557	13171.5896454937	158.145663538353	425129.067810011
C2	0	0	0.00414083301508684	12.3830027526779	2.74872600921632	13313.7273205036	160.086186960444	426161.039733408
C3	0	0	0.00667690128054741	12.1770016928273	3.1023333031968	16501.1525555704	177.141138522828	419071.51325865
