# Supplementary material for: Peptide-based Self-adaptive Implant Coating Sequentially Regulates Bone Regeneration to Enhance Interfacial Osseointegration
Source: Research Square preprint supplement (doi:10.21203/rs.3.rs-5132912/v1), 2024-10-01
Supplement: Supplementary file 597 [file 0-GO-Top20 all.xlsx]

## Sheet: demo_bubble_data
Term_ID	Term_description	ListHit	FoldEnrichment	p-value
GO:0030527	structural constituent of chromatin	18	7.04474	6.58209e-11
GO:0000786	nucleosome	19	5.3926	2.26611e-09
GO:0006334	nucleosome assembly	16	5.17295	7.64359e-08
GO:0046982	protein heterodimerization activity	28	3.15471	9.14278e-08
GO:0010628	positive regulation of gene expression	31	2.62551	1.09549e-06
GO:0045766	positive regulation of angiogenesis	15	4.04136	4.74428e-06
GO:0005576	extracellular region	80	1.63521	6.955e-06
GO:0007165	signal transduction	56	1.81053	1.20957e-05
GO:0005886	plasma membrane	173	1.32405	1.36677e-05
GO:0005178	integrin binding	15	3.66913	1.54499e-05
GO:0003180	aortic valve morphogenesis	7	7.22955	4.14263e-05
GO:0015293	symporter activity	7	7.22955	4.14263e-05
GO:0005615	extracellular space	67	1.6155	6.20846e-05
GO:0003184	pulmonary valve morphogenesis	5	10.9355	6.53096e-05
GO:0042098	T cell proliferation	7	6.3479	9.93358e-05
GO:0070062	extracellular exosome	84	1.4922	0.000110317
GO:0001525	angiogenesis	18	2.73163	0.00012029
GO:0048711	positive regulation of astrocyte differentiation	4	13.5202	0.000146815
GO:0032693	negative regulation of interleukin-10 production	5	9.29514	0.000153061
GO:0030335	positive regulation of cell migration	17	2.74813	0.000171597
GO:0016477	cell migration	17	2.67826	0.000233059
GO:0003677	DNA binding	44	1.72024	0.000333258
GO:0036003	positive regulation of transcription from RNA polymerase II promoter in response to stress	3	18.5903	0.000364085
GO:0042634	regulation of hair cycle	3	18.5903	0.000364085
GO:0006468	protein phosphorylation	23	2.204	0.000364152
GO:0009925	basal plasma membrane	8	4.50673	0.000378333
GO:0007160	cell-matrix adhesion	10	3.64515	0.000422271
GO:0001837	epithelial to mesenchymal transition	7	4.91064	0.000515891
GO:0098552	side of membrane	10	3.54101	0.000532446
GO:0051058	negative regulation of small GTPase mediated signal transduction	3	15.9345	0.000624422
GO:0002227	innate immune response in mucosa	5	6.63938	0.00081249
GO:0071222	cellular response to lipopolysaccharide	13	2.79391	0.00083361
GO:0002063	chondrocyte development	4	8.74837	0.000931269
GO:0048557	embryonic digestive tract morphogenesis	4	8.74837	0.000931269
GO:0001955	blood vessel maturation	3	13.9427	0.000979145
GO:0051148	negative regulation of muscle cell differentiation	3	13.9427	0.000979145
GO:0006935	chemotaxis	10	3.26145	0.00101404
GO:2000649	regulation of sodium ion transmembrane transporter activity	4	8.26235	0.00117208
GO:0050729	positive regulation of inflammatory response	9	3.44974	0.00120524
GO:0005164	tumor necrosis factor receptor binding	5	5.99686	0.00131457
GO:0005911	cell-cell junction	13	2.65575	0.00132743
GO:0007155	cell adhesion	25	1.93649	0.00134184
GO:0019221	cytokine-mediated signaling pathway	11	2.94235	0.00135265
GO:0045444	fat cell differentiation	8	3.71806	0.00137683
GO:0001755	neural crest cell migration	6	4.84964	0.0013815
GO:0003170	heart valve development	3	12.3935	0.00143946
GO:0003183	mitral valve morphogenesis	3	12.3935	0.00143946
GO:0008140	cAMP response element binding protein binding	3	12.3935	0.00143946
GO:0060732	positive regulation of inositol phosphate biosynthetic process	3	12.3935	0.00143946
GO:0070168	negative regulation of biomineral tissue development	3	12.3935	0.00143946
GO:0072205	metanephric collecting duct development	3	12.3935	0.00143946
GO:0003203	endocardial cushion morphogenesis	4	7.82749	0.00145333
GO:0007173	epidermal growth factor receptor signaling pathway	6	4.74645	0.00154828
GO:0050714	positive regulation of protein secretion	6	4.74645	0.00154828
GO:0051781	positive regulation of cell division	6	4.74645	0.00154828
GO:0008344	adult locomotory behavior	6	4.64757	0.00172995
GO:0045599	negative regulation of fat cell differentiation	6	4.64757	0.00172995
GO:0061436	establishment of skin barrier	5	5.63342	0.00175697
GO:0043065	positive regulation of apoptotic process	17	2.2256	0.00185249
GO:0014912	negative regulation of smooth muscle cell migration	3	11.1542	0.00201546
GO:0015820	leucine transport	3	11.1542	0.00201546
GO:0016303	1-phosphatidylinositol-3-kinase activity	3	11.1542	0.00201546
GO:0032940	secretion by cell	3	11.1542	0.00201546
GO:0060840	artery development	3	11.1542	0.00201546
GO:0070244	negative regulation of thymocyte apoptotic process	3	11.1542	0.00201546
GO:0071481	cellular response to X-ray	3	11.1542	0.00201546
GO:0010629	negative regulation of gene expression	15	2.34331	0.00205137
GO:0042149	cellular response to glucose starvation	6	4.46167	0.0021413
GO:0070830	bicellular tight junction assembly	6	4.46167	0.0021413
GO:1901224	positive regulation of non-canonical NF-kappaB signal transduction	7	3.82741	0.00229732
GO:0060412	ventricular septum morphogenesis	5	5.31151	0.00229963
GO:0008201	heparin binding	12	2.56418	0.00268605
GO:0090090	negative regulation of canonical Wnt signaling pathway	10	2.86004	0.00271611
GO:0002675	positive regulation of acute inflammatory response	3	10.1402	0.0027162
GO:0015824	proline transport	3	10.1402	0.0027162
GO:0033089	positive regulation of T cell differentiation in thymus	3	10.1402	0.0027162
GO:0043517	positive regulation of DNA damage response, signal transduction by p53 class mediator	3	10.1402	0.0027162
GO:0043522	leucine zipper domain binding	3	10.1402	0.0027162
GO:0051775	response to redox state	3	10.1402	0.0027162
GO:1990440	positive regulation of transcription from RNA polymerase II promoter in response to endoplasmic reticulum stress	3	10.1402	0.0027162
GO:0001938	positive regulation of endothelial cell proliferation	7	3.66569	0.00294203
GO:0014850	response to muscle activity	4	6.46618	0.00304959
GO:0140311	protein sequestering activity	4	6.46618	0.00304959
GO:0007219	Notch signaling pathway	9	3.01464	0.00306666
GO:0009986	cell surface	29	1.73072	0.00310016
GO:0071260	cellular response to mechanical stimulus	7	3.61478	0.00318508
GO:0030198	extracellular matrix organization	11	2.63862	0.00319585
GO:0030195	negative regulation of blood coagulation	3	9.29514	0.00354975
GO:0050795	regulation of behavior	3	9.29514	0.00354975
GO:0140416	transcription regulator inhibitor activity	4	6.19676	0.00358272
GO:0140467	integrated stress response signaling	4	6.19676	0.00358272
GO:0008285	negative regulation of cell population proliferation	20	1.95174	0.0035902
GO:0062023	collagen-containing extracellular matrix	20	1.94663	0.0036967
GO:0005912	adherens junction	12	2.46501	0.00370291
GO:0005788	endoplasmic reticulum lumen	17	2.07236	0.0038612
GO:0031594	neuromuscular junction	7	3.42452	0.00431354
GO:0031274	positive regulation of pseudopodium assembly	3	8.58013	0.00452326
GO:1904036	negative regulation of epithelial cell apoptotic process	3	8.58013	0.00452326
GO:0007266	Rho protein signal transduction	6	3.84626	0.00455557
GO:0071347	cellular response to interleukin-1	7	3.38005	0.00463771
GO:0045776	negative regulation of blood pressure	4	5.72009	0.0048316
GO:0010595	positive regulation of endothelial cell migration	6	3.71806	0.0053875
GO:0042102	positive regulation of T cell proliferation	6	3.71806	0.0053875
GO:0008305	integrin complex	4	5.50823	0.00555321
GO:0032200	telomere organization	4	5.50823	0.00555321
GO:0048662	negative regulation of smooth muscle cell proliferation	4	5.50823	0.00555321
GO:0003085	negative regulation of systemic arterial blood pressure	3	7.96726	0.00564298
GO:0004029	aldehyde dehydrogenase (NAD+) activity	3	7.96726	0.00564298
GO:0010838	positive regulation of keratinocyte proliferation	3	7.96726	0.00564298
GO:0030949	positive regulation of vascular endothelial growth factor receptor signaling pathway	3	7.96726	0.00564298
GO:0038084	vascular endothelial growth factor signaling pathway	3	7.96726	0.00564298
GO:0046007	negative regulation of activated T cell proliferation	3	7.96726	0.00564298
GO:0060392	negative regulation of SMAD protein signal transduction	3	7.96726	0.00564298
GO:0070306	lens fiber cell differentiation	3	7.96726	0.00564298
GO:0030334	regulation of cell migration	8	2.94499	0.00589619
GO:0032956	regulation of actin cytoskeleton organization	7	3.21313	0.00612084
GO:0007249	canonical NF-kappaB signal transduction	6	3.59812	0.00632545
GO:0006306	DNA methylation	4	5.31151	0.00634333
GO:0007520	myoblast fusion	4	5.31151	0.00634333
GO:0044331	cell-cell adhesion mediated by cadherin	4	5.31151	0.00634333
GO:0000785	chromatin	42	1.48864	0.00660865
GO:0002634	regulation of germinal center formation	2	14.8722	0.0068407
GO:0006564	L-serine biosynthetic process	2	14.8722	0.0068407
GO:0016702	oxidoreductase activity, acting on single donors with incorporation of molecular oxygen, incorporation of two atoms of oxygen	2	14.8722	0.0068407
GO:0032792	negative regulation of CREB transcription factor activity	2	14.8722	0.0068407
GO:0033135	regulation of peptidyl-serine phosphorylation	2	14.8722	0.0068407
GO:0036006	cellular response to macrophage colony-stimulating factor stimulus	2	14.8722	0.0068407
GO:0038135	ERBB2-ERBB4 signaling pathway	2	14.8722	0.0068407
GO:0043576	regulation of respiratory gaseous exchange	2	14.8722	0.0068407
GO:0045053	protein retention in Golgi apparatus	2	14.8722	0.0068407
GO:0070192	chromosome organization involved in meiotic cell cycle	2	14.8722	0.0068407
GO:0070232	regulation of T cell apoptotic process	2	14.8722	0.0068407
GO:0086006	voltage-gated sodium channel activity involved in cardiac muscle cell action potential	2	14.8722	0.0068407
GO:0090461	intracellular glutamate homeostasis	2	14.8722	0.0068407
GO:0098639	collagen binding involved in cell-matrix adhesion	2	14.8722	0.0068407
GO:0140444	cytoskeleton-nuclear membrane anchor activity	2	14.8722	0.0068407
GO:1901388	regulation of transforming growth factor beta activation	2	14.8722	0.0068407
GO:1905563	negative regulation of vascular endothelial cell proliferation	2	14.8722	0.0068407
GO:2001268	negative regulation of cysteine-type endopeptidase activity involved in apoptotic signaling pathway	2	14.8722	0.0068407
GO:0009058	biosynthetic process	3	7.43611	0.00691437
GO:0015175	neutral L-amino acid transmembrane transporter activity	3	7.43611	0.00691437
GO:0051963	regulation of synapse assembly	3	7.43611	0.00691437
GO:0070207	protein homotrimerization	3	7.43611	0.00691437
GO:0071548	response to dexamethasone	3	7.43611	0.00691437
GO:0034097	response to cytokine	5	4.13117	0.00695027
GO:0005923	bicellular tight junction	9	2.65575	0.00703641
GO:0010575	positive regulation of vascular endothelial growth factor production	4	5.12835	0.00720462
GO:0003151	outflow tract morphogenesis	5	4.04136	0.00762939
GO:0000122	negative regulation of transcription by RNA polymerase II	39	1.50108	0.00765157
GO:0016323	basolateral plasma membrane	14	2.09047	0.00772486
GO:0001934	positive regulation of protein phosphorylation	12	2.23083	0.00808107
GO:1905606	regulation of presynapse assembly	4	4.95741	0.00813962
GO:0030330	DNA damage response, signal transduction by p53 class mediator	3	6.97135	0.0083421
GO:0030902	hindbrain development	3	6.97135	0.0083421
GO:0090399	replicative senescence	3	6.97135	0.0083421
GO:0045669	positive regulation of osteoblast differentiation	6	3.38005	0.00854872
GO:0043066	negative regulation of apoptotic process	22	1.74408	0.00856728
GO:1990837	sequence-specific double-stranded DNA binding	25	1.67179	0.00882709
GO:0019731	antibacterial humoral response	5	3.87297	0.0091235
GO:0016342	catenin complex	4	4.79749	0.00915073
GO:0048247	lymphocyte chemotaxis	4	4.79749	0.00915073
GO:0002028	regulation of sodium ion transport	3	6.56127	0.00993014
GO:0002076	osteoblast development	3	6.56127	0.00993014
GO:0015179	L-amino acid transmembrane transporter activity	3	6.56127	0.00993014
GO:0035162	embryonic hemopoiesis	3	6.56127	0.00993014
GO:0043129	surfactant homeostasis	3	6.56127	0.00993014
GO:0061036	positive regulation of cartilage development	3	6.56127	0.00993014
GO:0001714	endodermal cell fate specification	2	12.3935	0.010079
GO:0002693	positive regulation of cellular extravasation	2	12.3935	0.010079
GO:0015190	L-leucine transmembrane transporter activity	2	12.3935	0.010079
GO:0015811	L-cystine transport	2	12.3935	0.010079
GO:0015827	tryptophan transport	2	12.3935	0.010079
GO:0031581	hemidesmosome assembly	2	12.3935	0.010079
GO:0033092	positive regulation of immature T cell proliferation in thymus	2	12.3935	0.010079
GO:0033631	cell-cell adhesion mediated by integrin	2	12.3935	0.010079
GO:0038138	ERBB4-ERBB4 signaling pathway	2	12.3935	0.010079
GO:0038154	interleukin-11-mediated signaling pathway	2	12.3935	0.010079
GO:0043619	regulation of transcription from RNA polymerase II promoter in response to oxidative stress	2	12.3935	0.010079
GO:0046079	dUMP catabolic process	2	12.3935	0.010079
GO:0048793	pronephros development	2	12.3935	0.010079
GO:0061038	uterus morphogenesis	2	12.3935	0.010079
GO:0070087	chromo shadow domain binding	2	12.3935	0.010079
GO:0090238	positive regulation of arachidonic acid secretion	2	12.3935	0.010079
GO:0140009	L-aspartate import across plasma membrane	2	12.3935	0.010079
GO:1905477	positive regulation of protein localization to membrane	2	12.3935	0.010079
GO:2000144	positive regulation of DNA-templated transcription initiation	2	12.3935	0.010079
GO:0003281	ventricular septum development	4	4.64757	0.0102403
GO:0040029	epigenetic regulation of gene expression	4	4.64757	0.0102403
GO:0005102	signaling receptor binding	17	1.86451	0.0106676
GO:0030838	positive regulation of actin filament polymerization	5	3.71806	0.0108079
GO:0017080	sodium channel regulator activity	4	4.50673	0.0114104
GO:0140658	ATP-dependent chromatin remodeler activity	4	4.50673	0.0114104
GO:0008028	monocarboxylic acid transmembrane transporter activity	3	6.19676	0.0116818
GO:0032695	negative regulation of interleukin-12 production	3	6.19676	0.0116818
GO:0043505	CENP-A containing nucleosome	3	6.19676	0.0116818
GO:0046579	positive regulation of Ras protein signal transduction	3	6.19676	0.0116818
GO:0061644	protein localization to CENP-A containing chromatin	3	6.19676	0.0116818
GO:2000114	regulation of establishment of cell polarity	3	6.19676	0.0116818
GO:0008083	growth factor activity	10	2.2951	0.0124018
GO:0015171	amino acid transmembrane transporter activity	4	4.37418	0.0126631
GO:0070059	intrinsic apoptotic signaling pathway in response to endoplasmic reticulum stress	4	4.37418	0.0126631
GO:1902895	positive regulation of miRNA transcription	5	3.57505	0.0126931
GO:0061844	antimicrobial humoral immune response mediated by antimicrobial peptide	6	3.09838	0.012859
GO:0030308	negative regulation of cell growth	8	2.56418	0.0131192
GO:0005125	cytokine activity	11	2.16395	0.0135217
GO:0015718	monocarboxylic acid transport	3	5.87061	0.0135996
GO:0035994	response to muscle stretch	3	5.87061	0.0135996
GO:2000010	positive regulation of protein localization to cell surface	3	5.87061	0.0135996
GO:0002260	lymphocyte homeostasis	2	10.623	0.0138608
GO:0002674	negative regulation of acute inflammatory response	2	10.623	0.0138608
GO:0010573	vascular endothelial growth factor production	2	10.623	0.0138608
GO:0015760	glucose-6-phosphate transport	2	10.623	0.0138608
GO:0035005	1-phosphatidylinositol-4-phosphate 3-kinase activity	2	10.623	0.0138608
GO:0036499	PERK-mediated unfolded protein response	2	10.623	0.0138608
GO:0043237	laminin-1 binding	2	10.623	0.0138608
GO:0043567	regulation of insulin-like growth factor receptor signaling pathway	2	10.623	0.0138608
GO:0046934	1-phosphatidylinositol-4,5-bisphosphate 3-kinase activity	2	10.623	0.0138608
GO:0048643	positive regulation of skeletal muscle tissue development	2	10.623	0.0138608
GO:0061337	cardiac conduction	2	10.623	0.0138608
GO:0098821	BMP receptor activity	2	10.623	0.0138608
GO:1902961	positive regulation of aspartic-type endopeptidase activity involved in amyloid precursor protein catabolic process	2	10.623	0.0138608
GO:2000391	positive regulation of neutrophil extravasation	2	10.623	0.0138608
GO:2001054	negative regulation of mesenchymal cell apoptotic process	2	10.623	0.0138608
GO:0004860	protein kinase inhibitor activity	4	4.24921	0.0140003
GO:0005154	epidermal growth factor receptor binding	4	4.24921	0.0140003
GO:0000977	RNA polymerase II transcription regulatory region sequence-specific DNA binding	16	1.84748	0.0140725
GO:0005856	cytoskeleton	20	1.71339	0.0141372
GO:0046983	protein dimerization activity	9	2.35651	0.0147092
GO:0007229	integrin-mediated signaling pathway	7	2.71108	0.0149232
GO:0006955	immune response	15	1.87781	0.0149579
GO:0043029	T cell homeostasis	4	4.13117	0.0154238
GO:0030175	filopodium	6	2.97444	0.015503
GO:0030279	negative regulation of ossification	3	5.57708	0.0156857
GO:0000976	transcription cis-regulatory region binding	12	2.03729	0.0157501
GO:0090575	RNA polymerase II transcription regulator complex	8	2.45822	0.0165668
GO:0045944	positive regulation of transcription by RNA polymerase II	44	1.39111	0.0167723
GO:0045746	negative regulation of Notch signaling pathway	4	4.01952	0.0169352
GO:0071479	cellular response to ionizing radiation	4	4.01952	0.0169352
GO:0007605	sensory perception of sound	9	2.29195	0.0173402
GO:0005942	phosphatidylinositol 3-kinase complex	3	5.31151	0.0179415
GO:0015804	neutral amino acid transport	3	5.31151	0.0179415
GO:0016338	calcium-independent cell-cell adhesion via plasma membrane cell-adhesion molecules	3	5.31151	0.0179415
GO:0021772	olfactory bulb development	3	5.31151	0.0179415
GO:0048754	branching morphogenesis of an epithelial tube	3	5.31151	0.0179415
GO:1903672	positive regulation of sprouting angiogenesis	3	5.31151	0.0179415
GO:0001649	osteoblast differentiation	8	2.41825	0.0181137
GO:0010467	gene expression	8	2.41825	0.0181137
GO:0001763	morphogenesis of a branching structure	2	9.29514	0.0181547
GO:0001936	regulation of endothelial cell proliferation	2	9.29514	0.0181547
GO:0001960	negative regulation of cytokine-mediated signaling pathway	2	9.29514	0.0181547
GO:0007260	tyrosine phosphorylation of STAT protein	2	9.29514	0.0181547
GO:0010544	negative regulation of platelet activation	2	9.29514	0.0181547
GO:0010757	negative regulation of plasminogen activation	2	9.29514	0.0181547
GO:0015194	L-serine transmembrane transporter activity	2	9.29514	0.0181547
GO:0015825	L-serine transport	2	9.29514	0.0181547
GO:0021520	spinal cord motor neuron cell fate specification	2	9.29514	0.0181547
GO:0030056	hemidesmosome	2	9.29514	0.0181547
GO:0031995	insulin-like growth factor II binding	2	9.29514	0.0181547
GO:0038134	ERBB2-EGFR signaling pathway	2	9.29514	0.0181547
GO:0060022	hard palate development	2	9.29514	0.0181547
GO:0060484	lung-associated mesenchyme development	2	9.29514	0.0181547
GO:0150078	positive regulation of neuroinflammatory response	2	9.29514	0.0181547
GO:0005179	hormone activity	7	2.60264	0.0183095
GO:0014070	response to organic cyclic compound	5	3.26145	0.0183478
GO:0001974	blood vessel remodeling	4	3.81339	0.0202275
GO:0004896	cytokine receptor activity	4	3.81339	0.0202275
GO:0033627	cell adhesion mediated by integrin	4	3.81339	0.0202275
GO:0050767	regulation of neurogenesis	4	3.81339	0.0202275
GO:0061629	RNA polymerase II-specific DNA-binding transcription factor binding	10	2.1246	0.0202318
GO:0007267	cell-cell signaling	12	1.96549	0.0202665
GO:0006954	inflammatory response	18	1.70293	0.0203473
GO:0036092	phosphatidylinositol-3-phosphate biosynthetic process	3	5.07008	0.0203681
GO:0071356	cellular response to tumor necrosis factor	8	2.34208	0.0215133
GO:0048286	lung alveolus development	4	3.71806	0.0220109
GO:0003208	cardiac ventricle morphogenesis	2	8.26235	0.0229305
GO:0005520	insulin-like growth factor binding	2	8.26235	0.0229305
GO:0006868	glutamine transport	2	8.26235	0.0229305
GO:0015180	L-alanine transmembrane transporter activity	2	8.26235	0.0229305
GO:0015183	L-aspartate transmembrane transporter activity	2	8.26235	0.0229305
GO:0015186	L-glutamine transmembrane transporter activity	2	8.26235	0.0229305
GO:0019227	neuronal action potential propagation	2	8.26235	0.0229305
GO:0021799	cerebral cortex radially oriented cell migration	2	8.26235	0.0229305
GO:0031434	mitogen-activated protein kinase kinase binding	2	8.26235	0.0229305
GO:0032287	peripheral nervous system myelin maintenance	2	8.26235	0.0229305
GO:0034351	negative regulation of glial cell apoptotic process	2	8.26235	0.0229305
GO:0034618	arginine binding	2	8.26235	0.0229305
GO:0035136	forelimb morphogenesis	2	8.26235	0.0229305
GO:0043267	negative regulation of potassium ion transport	2	8.26235	0.0229305
GO:0043304	regulation of mast cell degranulation	2	8.26235	0.0229305
GO:0060174	limb bud formation	2	8.26235	0.0229305
GO:0061298	retina vasculature development in camera-type eye	2	8.26235	0.0229305
GO:0061733	peptide-lysine-N-acetyltransferase activity	2	8.26235	0.0229305
GO:0071169	establishment of protein localization to chromatin	2	8.26235	0.0229305
GO:0098712	L-glutamate import across plasma membrane	2	8.26235	0.0229305
GO:0007265	Ras protein signal transduction	6	2.72053	0.0230845
GO:0031490	chromatin DNA binding	6	2.72053	0.0230845
GO:0098609	cell-cell adhesion	10	2.07713	0.0232422
GO:0043406	positive regulation of MAP kinase activity	5	3.04759	0.0239103
GO:0005509	calcium ion binding	28	1.48299	0.0250702
GO:0030099	myeloid cell differentiation	3	4.64757	0.0257349
GO:0030325	adrenal gland development	3	4.64757	0.0257349
GO:0043153	entrainment of circadian clock by photoperiod	3	4.64757	0.0257349
GO:0045662	negative regulation of myoblast differentiation	3	4.64757	0.0257349
GO:0099560	synaptic membrane adhesion	3	4.64757	0.0257349
GO:0007259	receptor signaling pathway via JAK-STAT	4	3.54101	0.025858
GO:0060048	cardiac muscle contraction	4	3.54101	0.025858
GO:0006325	chromatin organization	10	2.03172	0.0265639
GO:0032496	response to lipopolysaccharide	8	2.23642	0.0274235
GO:0009898	cytoplasmic side of plasma membrane	7	2.38774	0.0278284
GO:0031295	T cell costimulation	4	3.45866	0.0279233
GO:0001893	maternal placenta development	2	7.43611	0.0281593
GO:0004629	phospholipase C activity	2	7.43611	0.0281593
GO:0007567	parturition	2	7.43611	0.0281593
GO:0016126	sterol biosynthetic process	2	7.43611	0.0281593
GO:0033629	negative regulation of cell adhesion mediated by integrin	2	7.43611	0.0281593
GO:0046578	regulation of Ras protein signal transduction	2	7.43611	0.0281593
GO:0060009	Sertoli cell development	2	7.43611	0.0281593
GO:0060054	positive regulation of epithelial cell proliferation involved in wound healing	2	7.43611	0.0281593
GO:0060576	intestinal epithelial cell development	2	7.43611	0.0281593
GO:0061626	pharyngeal arch artery morphogenesis	2	7.43611	0.0281593
GO:0097152	mesenchymal cell apoptotic process	2	7.43611	0.0281593
GO:1903140	regulation of establishment of endothelial barrier	2	7.43611	0.0281593
GO:2000347	positive regulation of hepatocyte proliferation	2	7.43611	0.0281593
GO:0008360	regulation of cell shape	8	2.21973	0.0285078
GO:0035904	aorta development	3	4.46167	0.0286747
GO:0048015	phosphatidylinositol-mediated signaling	3	4.46167	0.0286747
GO:0060976	coronary vasculature development	3	4.46167	0.0286747
GO:0070412	R-SMAD binding	3	4.46167	0.0286747
GO:0071542	dopaminergic neuron differentiation	3	4.46167	0.0286747
GO:0090200	positive regulation of release of cytochrome c from mitochondria	3	4.46167	0.0286747
GO:0090303	positive regulation of wound healing	3	4.46167	0.0286747
GO:0001947	heart looping	5	2.90473	0.0287256
GO:0045893	positive regulation of DNA-templated transcription	27	1.47629	0.0288499
GO:0008284	positive regulation of cell population proliferation	20	1.58891	0.0288544
GO:0030336	negative regulation of cell migration	8	2.20329	0.0296214
GO:0010976	positive regulation of neuron projection development	7	2.32378	0.0316313
GO:0000228	nuclear chromosome	3	4.29006	0.0317847
GO:0001954	positive regulation of cell-matrix adhesion	3	4.29006	0.0317847
GO:0003148	outflow tract septum morphogenesis	3	4.29006	0.0317847
GO:0005112	Notch binding	3	4.29006	0.0317847
GO:0019898	extrinsic component of membrane	3	4.29006	0.0317847
GO:0030507	spectrin binding	3	4.29006	0.0317847
GO:0070160	tight junction	3	4.29006	0.0317847
GO:0097746	blood vessel diameter maintenance	3	4.29006	0.0317847
GO:0042127	regulation of cell population proliferation	8	2.17113	0.0319375
GO:0006869	lipid transport	5	2.81671	0.0322529
GO:1990841	promoter-specific chromatin binding	5	2.81671	0.0322529
GO:0004715	non-membrane spanning protein tyrosine kinase activity	4	3.30494	0.0323412
GO:0014704	intercalated disc	4	3.30494	0.0323412
GO:0016339	calcium-dependent cell-cell adhesion via plasma membrane cell adhesion molecules	4	3.30494	0.0323412
GO:0016529	sarcoplasmic reticulum	4	3.30494	0.0323412
GO:0030968	endoplasmic reticulum unfolded protein response	4	3.30494	0.0323412
GO:0050731	positive regulation of peptidyl-tyrosine phosphorylation	6	2.50655	0.0328269
GO:0003139	secondary heart field specification	2	6.7601	0.0338133
GO:0008080	N-acetyltransferase activity	2	6.7601	0.0338133
GO:0008090	retrograde axonal transport	2	6.7601	0.0338133
GO:0019372	lipoxygenase pathway	2	6.7601	0.0338133
GO:0019896	axonal transport of mitochondrion	2	6.7601	0.0338133
GO:0030219	megakaryocyte differentiation	2	6.7601	0.0338133
GO:0032330	regulation of chondrocyte differentiation	2	6.7601	0.0338133
GO:0034713	type I transforming growth factor beta receptor binding	2	6.7601	0.0338133
GO:0034993	meiotic nuclear membrane microtubule tethering complex	2	6.7601	0.0338133
GO:0035254	glutamate receptor binding	2	6.7601	0.0338133
GO:0042166	acetylcholine binding	2	6.7601	0.0338133
GO:0042532	negative regulation of tyrosine phosphorylation of STAT protein	2	6.7601	0.0338133
GO:0043405	regulation of MAP kinase activity	2	6.7601	0.0338133
GO:0045056	transcytosis	2	6.7601	0.0338133
GO:0045059	positive thymic T cell selection	2	6.7601	0.0338133
GO:0045199	maintenance of epithelial cell apical/basal polarity	2	6.7601	0.0338133
GO:0060020	Bergmann glial cell differentiation	2	6.7601	0.0338133
GO:0060674	placenta blood vessel development	2	6.7601	0.0338133
GO:0072359	circulatory system development	2	6.7601	0.0338133
GO:0102545	phosphatidyl phospholipase B activity	2	6.7601	0.0338133
GO:0140296	general transcription initiation factor binding	2	6.7601	0.0338133
GO:1902043	positive regulation of extrinsic apoptotic signaling pathway via death domain receptors	2	6.7601	0.0338133
GO:1903706	regulation of hemopoiesis	2	6.7601	0.0338133
GO:1904996	positive regulation of leukocyte adhesion to vascular endothelial cell	2	6.7601	0.0338133
GO:1905370	serine-type endopeptidase complex	2	6.7601	0.0338133
GO:0071300	cellular response to retinoic acid	5	2.77467	0.0341134
GO:0005244	voltage-gated monoatomic ion channel activity	3	4.13117	0.0350637
GO:0009880	embryonic pattern specification	3	4.13117	0.0350637
GO:0003700	DNA-binding transcription factor activity	20	1.55242	0.0355
GO:0009952	anterior/posterior pattern specification	6	2.45147	0.0360337
GO:0097110	scaffold protein binding	5	2.73386	0.0360392
GO:0001932	regulation of protein phosphorylation	4	3.1643	0.037145
GO:0008009	chemokine activity	4	3.1643	0.037145
GO:0022617	extracellular matrix disassembly	4	3.1643	0.037145
GO:0035914	skeletal muscle cell differentiation	4	3.1643	0.037145
GO:0048538	thymus development	4	3.1643	0.037145
GO:0008286	insulin receptor signaling pathway	5	2.69424	0.0380307
GO:0003333	amino acid transmembrane transport	3	3.98363	0.0385101
GO:0030178	negative regulation of Wnt signaling pathway	4	3.09838	0.0396924
GO:0045668	negative regulation of osteoblast differentiation	4	3.09838	0.0396924
GO:0050918	positive chemotaxis	4	3.09838	0.0396924
GO:0001771	immunological synapse formation	2	6.19676	0.039866
GO:0003323	type B pancreatic cell development	2	6.19676	0.039866
GO:0017166	vinculin binding	2	6.19676	0.039866
GO:0019887	protein kinase regulator activity	2	6.19676	0.039866
GO:0021527	spinal cord association neuron differentiation	2	6.19676	0.039866
GO:0030162	regulation of proteolysis	2	6.19676	0.039866
GO:0042301	phosphate ion binding	2	6.19676	0.039866
GO:0043276	anoikis	2	6.19676	0.039866
GO:0045060	negative thymic T cell selection	2	6.19676	0.039866
GO:0045616	regulation of keratinocyte differentiation	2	6.19676	0.039866
GO:0051549	positive regulation of keratinocyte migration	2	6.19676	0.039866
GO:0060707	trophoblast giant cell differentiation	2	6.19676	0.039866
GO:0070327	thyroid hormone transport	2	6.19676	0.039866
GO:0086012	membrane depolarization during cardiac muscle cell action potential	2	6.19676	0.039866
GO:0095500	acetylcholine receptor signaling pathway	2	6.19676	0.039866
GO:0097264	self proteolysis	2	6.19676	0.039866
GO:0140052	cellular response to oxidised low-density lipoprotein particle stimulus	2	6.19676	0.039866
GO:1903377	negative regulation of oxidative stress-induced neuron intrinsic apoptotic signaling pathway	2	6.19676	0.039866
GO:0043621	protein self-association	5	2.65575	0.0400882
GO:0009897	external side of plasma membrane	16	1.62095	0.0405484
GO:0007411	axon guidance	9	1.96838	0.0406849
GO:0045211	postsynaptic membrane	9	1.96838	0.0406849
GO:0003785	actin monomer binding	3	3.84626	0.0421223
GO:0030866	cortical actin cytoskeleton organization	3	3.84626	0.0421223
GO:0010718	positive regulation of epithelial to mesenchymal transition	4	3.03515	0.042337
GO:0031252	cell leading edge	4	3.03515	0.042337
GO:0034614	cellular response to reactive oxygen species	4	3.03515	0.042337
GO:0043525	positive regulation of neuron apoptotic process	4	3.03515	0.042337
GO:0043491	phosphatidylinositol 3-kinase/protein kinase B signal transduction	5	2.58198	0.0444026
GO:0007519	skeletal muscle tissue development	4	2.97444	0.0450787
GO:0045786	negative regulation of cell cycle	4	2.97444	0.0450787
GO:0014059	regulation of dopamine secretion	3	3.71806	0.0458981
GO:0048008	platelet-derived growth factor receptor signaling pathway	3	3.71806	0.0458981
GO:0002690	positive regulation of leukocyte chemotaxis	2	5.72009	0.046292
GO:0006623	protein targeting to vacuole	2	5.72009	0.046292
GO:0019992	diacylglycerol binding	2	5.72009	0.046292
GO:0031994	insulin-like growth factor I binding	2	5.72009	0.046292
GO:0035313	wound healing, spreading of epidermal cells	2	5.72009	0.046292
GO:0035810	positive regulation of urine volume	2	5.72009	0.046292
GO:0042129	regulation of T cell proliferation	2	5.72009	0.046292
GO:0043114	regulation of vascular permeability	2	5.72009	0.046292
GO:0043568	positive regulation of insulin-like growth factor receptor signaling pathway	2	5.72009	0.046292
GO:0051918	negative regulation of fibrinolysis	2	5.72009	0.046292
GO:0055119	relaxation of cardiac muscle	2	5.72009	0.046292
GO:0071498	cellular response to fluid shear stress	2	5.72009	0.046292
GO:1990253	cellular response to leucine starvation	2	5.72009	0.046292
GO:1990909	Wnt signalosome	2	5.72009	0.046292
GO:2000279	negative regulation of DNA biosynthetic process	2	5.72009	0.046292
GO:0000902	cell morphogenesis	6	2.29983	0.0468319
GO:0000981	DNA-binding transcription factor activity, RNA polymerase II-specific	41	1.30738	0.0478815
GO:0045596	negative regulation of cell differentiation	4	2.91612	0.0479173
GO:0048661	positive regulation of smooth muscle cell proliferation	4	2.91612	0.0479173
GO:0007179	transforming growth factor beta receptor signaling pathway	6	2.27636	0.0488065
GO:0030036	actin cytoskeleton organization	10	1.82258	0.0496741
GO:0043235	receptor complex	10	1.82258	0.0496741
GO:0006730	one-carbon metabolic process	3	3.59812	0.0498353
GO:0030511	positive regulation of transforming growth factor beta receptor signaling pathway	3	3.59812	0.0498353
GO:0050772	positive regulation of axonogenesis	3	3.59812	0.0498353
GO:0071773	cellular response to BMP stimulus	3	3.59812	0.0498353
GO:0051092	positive regulation of NF-kappaB transcription factor activity	8	1.98296	0.0500326
GO:0008237	metallopeptidase activity	4	2.86004	0.0508526
GO:0042572	retinol metabolic process	4	2.86004	0.0508526
GO:0006338	chromatin remodeling	14	1.62158	0.0528073
GO:0003779	actin binding	12	1.69645	0.052957
GO:0001518	voltage-gated sodium channel complex	2	5.31151	0.0530668
GO:0004065	arylsulfatase activity	2	5.31151	0.0530668
GO:0006112	energy reserve metabolic process	2	5.31151	0.0530668
GO:0010955	negative regulation of protein processing	2	5.31151	0.0530668
GO:0021895	cerebral cortex neuron differentiation	2	5.31151	0.0530668
GO:0042562	hormone binding	2	5.31151	0.0530668
GO:0043116	negative regulation of vascular permeability	2	5.31151	0.0530668
GO:0045778	positive regulation of ossification	2	5.31151	0.0530668
GO:0046655	folic acid metabolic process	2	5.31151	0.0530668
GO:0051443	positive regulation of ubiquitin-protein transferase activity	2	5.31151	0.0530668
GO:0070102	interleukin-6-mediated signaling pathway	2	5.31151	0.0530668
GO:0008076	voltage-gated potassium channel complex	5	2.44609	0.0538347
GO:0002062	chondrocyte differentiation	4	2.80608	0.0538843
GO:0018108	peptidyl-tyrosine phosphorylation	4	2.80608	0.0538843
GO:0030282	bone mineralization	4	2.80608	0.0538843
GO:0033209	tumor necrosis factor-mediated signaling pathway	4	2.80608	0.0538843
GO:0001958	endochondral ossification	3	3.48568	0.0539314
GO:0004402	histone acetyltransferase activity	3	3.48568	0.0539314
GO:0034332	adherens junction organization	3	3.48568	0.0539314
GO:0070269	pyroptosis	3	3.48568	0.0539314
GO:0051402	neuron apoptotic process	5	2.41432	0.0563606
GO:0008543	fibroblast growth factor receptor signaling pathway	4	2.75412	0.057012
GO:0030155	regulation of cell adhesion	4	2.75412	0.057012
GO:0042472	inner ear morphogenesis	4	2.75412	0.057012
GO:0031528	microvillus membrane	3	3.38005	0.0581835
GO:0032570	response to progesterone	3	3.38005	0.0581835
GO:0035633	maintenance of blood-brain barrier	3	3.38005	0.0581835
GO:0072593	reactive oxygen species metabolic process	3	3.38005	0.0581835
GO:0097192	extrinsic apoptotic signaling pathway in absence of ligand	3	3.38005	0.0581835
GO:2000352	negative regulation of endothelial cell apoptotic process	3	3.38005	0.0581835
GO:0030425	dendrite	17	1.51575	0.0594751
GO:0051015	actin filament binding	10	1.76211	0.0596863
GO:0001944	vasculature development	2	4.95741	0.0601672
GO:0002221	pattern recognition receptor signaling pathway	2	4.95741	0.0601672
GO:0002687	positive regulation of leukocyte migration	2	4.95741	0.0601672
GO:0004620	phospholipase activity	2	4.95741	0.0601672
GO:0006111	regulation of gluconeogenesis	2	4.95741	0.0601672
GO:0006895	Golgi to endosome transport	2	4.95741	0.0601672
GO:0007064	mitotic sister chromatid cohesion	2	4.95741	0.0601672
GO:0014002	astrocyte development	2	4.95741	0.0601672
GO:0030007	intracellular potassium ion homeostasis	2	4.95741	0.0601672
GO:0032725	positive regulation of granulocyte macrophage colony-stimulating factor production	2	4.95741	0.0601672
GO:0046475	glycerophospholipid catabolic process	2	4.95741	0.0601672
GO:0047555	3',5'-cyclic-GMP phosphodiesterase activity	2	4.95741	0.0601672
GO:0048246	macrophage chemotaxis	2	4.95741	0.0601672
GO:0061053	somite development	2	4.95741	0.0601672
GO:0071514	genomic imprinting	2	4.95741	0.0601672
GO:0090162	establishment of epithelial cell polarity	2	4.95741	0.0601672
GO:1990226	histone methyltransferase binding	2	4.95741	0.0601672
GO:2000145	regulation of cell motility	2	4.95741	0.0601672
GO:0071333	cellular response to glucose stimulus	4	2.70404	0.060235
GO:0007275	multicellular organism development	5	2.3532	0.0616138
GO:0007596	blood coagulation	5	2.3532	0.0616138
GO:0031669	cellular response to nutrient levels	3	3.28064	0.0625887
GO:0043542	endothelial cell migration	3	3.28064	0.0625887
GO:0070507	regulation of microtubule cytoskeleton organization	3	3.28064	0.0625887
GO:0008134	transcription factor binding	4	2.65575	0.0635527
GO:0045785	positive regulation of cell adhesion	4	2.65575	0.0635527
GO:0048167	regulation of synaptic plasticity	4	2.65575	0.0635527
GO:0060041	retina development in camera-type eye	4	2.65575	0.0635527
GO:0006874	intracellular calcium ion homeostasis	6	2.1246	0.0640518
GO:0030593	neutrophil chemotaxis	5	2.32378	0.064341
GO:0001618	virus receptor activity	5	2.2951	0.0671348
GO:0001657	ureteric bud development	3	3.1869	0.0671438
GO:0006865	amino acid transport	3	3.1869	0.0671438
GO:0071526	semaphorin-plexin signaling pathway	3	3.1869	0.0671438
GO:0010765	positive regulation of sodium ion transport	2	4.64757	0.0675708
GO:0016010	dystrophin-associated glycoprotein complex	2	4.64757	0.0675708
GO:0019725	cellular homeostasis	2	4.64757	0.0675708
GO:0030111	regulation of Wnt signaling pathway	2	4.64757	0.0675708
GO:0030277	maintenance of gastrointestinal epithelium	2	4.64757	0.0675708
GO:0030502	negative regulation of bone mineralization	2	4.64757	0.0675708
GO:0030889	negative regulation of B cell proliferation	2	4.64757	0.0675708
GO:0033268	node of Ranvier	2	4.64757	0.0675708
GO:0040037	negative regulation of fibroblast growth factor receptor signaling pathway	2	4.64757	0.0675708
GO:0045717	negative regulation of fatty acid biosynthetic process	2	4.64757	0.0675708
GO:0051044	positive regulation of membrane protein ectodomain proteolysis	2	4.64757	0.0675708
GO:0061178	regulation of insulin secretion involved in cellular response to glucose stimulus	2	4.64757	0.0675708
GO:0072520	seminiferous tubule development	2	4.64757	0.0675708
GO:0086002	cardiac muscle cell action potential involved in contraction	2	4.64757	0.0675708
GO:0004386	helicase activity	4	2.56418	0.0704692
GO:0019216	regulation of lipid metabolic process	3	3.09838	0.0718457
GO:0007015	actin filament organization	7	1.92788	0.0724118
GO:0016491	oxidoreductase activity	5	2.23979	0.0729219
GO:0034976	response to endoplasmic reticulum stress	5	2.23979	0.0729219
GO:0000083	regulation of transcription involved in G1/S transition of mitotic cell cycle	2	4.37418	0.0752562
GO:0000159	protein phosphatase type 2A complex	2	4.37418	0.0752562
GO:0007097	nuclear migration	2	4.37418	0.0752562
GO:0008569	minus-end-directed microtubule motor activity	2	4.37418	0.0752562
GO:0030169	low-density lipoprotein particle binding	2	4.37418	0.0752562
GO:0035435	phosphate ion transmembrane transport	2	4.37418	0.0752562
GO:0042770	signal transduction in response to DNA damage	2	4.37418	0.0752562
GO:0045638	negative regulation of myeloid cell differentiation	2	4.37418	0.0752562
GO:0050811	GABA receptor binding	2	4.37418	0.0752562
GO:0051642	centrosome localization	2	4.37418	0.0752562
GO:0060384	innervation	2	4.37418	0.0752562
GO:0060749	mammary gland alveolus development	2	4.37418	0.0752562
GO:0150104	transport across blood-brain barrier	5	2.21313	0.0759145
GO:0042311	vasodilation	3	3.01464	0.0766907
GO:0043407	negative regulation of MAP kinase activity	3	3.01464	0.0766907
GO:0007417	central nervous system development	7	1.89974	0.0769728
GO:0000791	euchromatin	4	2.4787	0.0777546
GO:0005604	basement membrane	5	2.18709	0.0789727
GO:0020037	heme binding	7	1.88597	0.079315
GO:0043524	negative regulation of neuron apoptotic process	7	1.88597	0.079315
GO:0001541	ovarian follicle development	3	2.93531	0.0816754
GO:0007616	long-term memory	3	2.93531	0.0816754
GO:0032993	protein-DNA complex	3	2.93531	0.0816754
GO:0042594	response to starvation	3	2.93531	0.0816754
GO:0043536	positive regulation of blood vessel endothelial cell migration	3	2.93531	0.0816754
GO:1900182	positive regulation of protein localization to nucleus	3	2.93531	0.0816754
GO:0019903	protein phosphatase binding	5	2.16166	0.0820961
GO:0001709	cell fate determination	2	4.13117	0.083203
GO:0006977	DNA damage response, signal transduction by p53 class mediator resulting in cell cycle arrest	2	4.13117	0.083203
GO:0008970	phospholipase A1 activity	2	4.13117	0.083203
GO:0030297	transmembrane receptor protein tyrosine kinase activator activity	2	4.13117	0.083203
GO:0030371	translation repressor activity	2	4.13117	0.083203
GO:0031527	filopodium membrane	2	4.13117	0.083203
GO:0035234	ectopic germ cell programmed cell death	2	4.13117	0.083203
GO:0042462	eye photoreceptor cell development	2	4.13117	0.083203
GO:0044342	type B pancreatic cell proliferation	2	4.13117	0.083203
GO:0045618	positive regulation of keratinocyte differentiation	2	4.13117	0.083203
GO:0046914	transition metal ion binding	2	4.13117	0.083203
GO:0048535	lymph node development	2	4.13117	0.083203
GO:0051145	smooth muscle cell differentiation	2	4.13117	0.083203
GO:0060088	auditory receptor cell stereocilium organization	2	4.13117	0.083203
GO:1901800	positive regulation of proteasomal protein catabolic process	2	4.13117	0.083203
GO:1905564	positive regulation of vascular endothelial cell proliferation	2	4.13117	0.083203
GO:2001224	positive regulation of neuron migration	2	4.13117	0.083203
GO:0008233	peptidase activity	5	2.13681	0.0852842
GO:0019722	calcium-mediated signaling	5	2.13681	0.0852842
GO:0030512	negative regulation of transforming growth factor beta receptor signaling pathway	5	2.13681	0.0852842
GO:0071277	cellular response to calcium ion	5	2.13681	0.0852842
GO:0001786	phosphatidylserine binding	4	2.39875	0.0854008
GO:0006879	intracellular iron ion homeostasis	4	2.39875	0.0854008
GO:0032456	endocytic recycling	4	2.39875	0.0854008
GO:0005524	ATP binding	48	1.22154	0.0862668
GO:0007595	lactation	3	2.86004	0.0867961
GO:0009953	dorsal/ventral pattern formation	3	2.86004	0.0867961
GO:0050919	negative chemotaxis	3	2.86004	0.0867961
GO:0035264	multicellular organism growth	5	2.11253	0.0885365
GO:0007623	circadian rhythm	4	2.36067	0.0893562
GO:0009611	response to wounding	4	2.36067	0.0893562
GO:0032757	positive regulation of interleukin-8 production	4	2.36067	0.0893562
GO:0070301	cellular response to hydrogen peroxide	4	2.36067	0.0893562
GO:0071560	cellular response to transforming growth factor beta stimulus	4	2.36067	0.0893562
GO:1904115	axon cytoplasm	4	2.36067	0.0893562
GO:0045296	cadherin binding	13	1.51996	0.0894302
GO:0031175	neuron projection development	6	1.93986	0.0901614
GO:0010759	positive regulation of macrophage chemotaxis	2	3.91374	0.0913916
GO:0015813	L-glutamate transmembrane transport	2	3.91374	0.0913916
GO:0030166	proteoglycan biosynthetic process	2	3.91374	0.0913916
GO:0032012	regulation of ARF protein signal transduction	2	3.91374	0.0913916
GO:0032332	positive regulation of chondrocyte differentiation	2	3.91374	0.0913916
GO:0042730	fibrinolysis	2	3.91374	0.0913916
GO:0043027	cysteine-type endopeptidase inhibitor activity involved in apoptotic process	2	3.91374	0.0913916
GO:0043388	positive regulation of DNA binding	2	3.91374	0.0913916
GO:0045721	negative regulation of gluconeogenesis	2	3.91374	0.0913916
GO:0060252	positive regulation of glial cell proliferation	2	3.91374	0.0913916
GO:1902004	positive regulation of amyloid-beta formation	2	3.91374	0.0913916
GO:1904019	epithelial cell apoptotic process	2	3.91374	0.0913916
GO:2001222	regulation of neuron migration	2	3.91374	0.0913916
GO:0015459	potassium channel regulator activity	3	2.78854	0.0920489
GO:0048488	synaptic vesicle endocytosis	3	2.78854	0.0920489
GO:0005518	collagen binding	4	2.32378	0.0933983
GO:0007416	synapse assembly	4	2.32378	0.0933983
GO:0042531	positive regulation of tyrosine phosphorylation of STAT protein	4	2.32378	0.0933983
GO:0043433	negative regulation of DNA-binding transcription factor activity	4	2.32378	0.0933983
GO:0001756	somitogenesis	3	2.72053	0.0974301
GO:2000134	negative regulation of G1/S transition of mitotic cell cycle	3	2.72053	0.0974301
GO:0006919	activation of cysteine-type endopeptidase activity involved in apoptotic process	4	2.28803	0.0975256
GO:0005884	actin filament	5	2.04289	0.0986735
GO:0034599	cellular response to oxidative stress	5	2.04289	0.0986735
GO:0008045	motor neuron axon guidance	2	3.71806	0.0998034
GO:0008093	cytoskeletal anchor activity	2	3.71806	0.0998034
GO:0010460	positive regulation of heart rate	2	3.71806	0.0998034
GO:0017158	regulation of calcium ion-dependent exocytosis	2	3.71806	0.0998034
GO:0030500	regulation of bone mineralization	2	3.71806	0.0998034
GO:0030837	negative regulation of actin filament polymerization	2	3.71806	0.0998034
GO:0031290	retinal ganglion cell axon guidance	2	3.71806	0.0998034
GO:0036122	BMP binding	2	3.71806	0.0998034
GO:0042246	tissue regeneration	2	3.71806	0.0998034
GO:0043392	negative regulation of DNA binding	2	3.71806	0.0998034
GO:0060307	regulation of ventricular cardiac muscle cell membrane repolarization	2	3.71806	0.0998034
GO:2000406	positive regulation of T cell migration	2	3.71806	0.0998034
GO:0001227	DNA-binding transcription repressor activity, RNA polymerase II-specific	13	1.48722	0.101361
GO:0050830	defense response to Gram-positive bacterium	6	1.87465	0.102007
GO:0007566	embryo implantation	3	2.65575	0.102936
GO:0030501	positive regulation of bone mineralization	3	2.65575	0.102936
GO:0032689	negative regulation of type II interferon production	3	2.65575	0.102936
GO:0035591	signaling adaptor activity	3	2.65575	0.102936
GO:0043010	camera-type eye development	3	2.65575	0.102936
GO:0045663	positive regulation of myoblast differentiation	3	2.65575	0.102936
GO:0048704	embryonic skeletal system morphogenesis	3	2.65575	0.102936
GO:0071364	cellular response to epidermal growth factor stimulus	3	2.65575	0.102936
GO:0005248	voltage-gated sodium channel activity	2	3.54101	0.10842
GO:0006541	glutamine metabolic process	2	3.54101	0.10842
GO:0009948	anterior/posterior axis specification	2	3.54101	0.10842
GO:0010613	positive regulation of cardiac muscle hypertrophy	2	3.54101	0.10842
GO:0010667	negative regulation of cardiac muscle cell apoptotic process	2	3.54101	0.10842
GO:0031589	cell-substrate adhesion	2	3.54101	0.10842
GO:0031929	TOR signaling	2	3.54101	0.10842
GO:0034755	iron ion transmembrane transport	2	3.54101	0.10842
GO:0043194	axon initial segment	2	3.54101	0.10842
GO:0043523	regulation of neuron apoptotic process	2	3.54101	0.10842
GO:0043537	negative regulation of blood vessel endothelial cell migration	2	3.54101	0.10842
GO:0045736	negative regulation of cyclin-dependent protein serine/threonine kinase activity	2	3.54101	0.10842
GO:0046928	regulation of neurotransmitter secretion	2	3.54101	0.10842
GO:0051010	microtubule plus-end binding	2	3.54101	0.10842
GO:0061028	establishment of endothelial barrier	2	3.54101	0.10842
GO:0071539	protein localization to centrosome	2	3.54101	0.10842
GO:0080111	DNA demethylation	2	3.54101	0.10842
GO:0090026	positive regulation of monocyte chemotaxis	2	3.54101	0.10842
GO:0001658	branching involved in ureteric bud morphogenesis	3	2.59399	0.108562
GO:0007043	cell-cell junction assembly	3	2.59399	0.108562
GO:0030276	clathrin binding	3	2.59399	0.108562
GO:0031667	response to nutrient levels	3	2.59399	0.108562
GO:0045747	positive regulation of Notch signaling pathway	3	2.59399	0.108562
GO:0048156	tau protein binding	3	2.59399	0.108562
GO:0016020	membrane	96	1.12455	0.112315
GO:0007409	axonogenesis	5	1.95687	0.113053
GO:0060070	canonical Wnt signaling pathway	5	1.95687	0.113053
GO:0031410	cytoplasmic vesicle	11	1.51476	0.113618
GO:0006357	regulation of transcription by RNA polymerase II	47	1.19609	0.114196
GO:0006813	potassium ion transport	4	2.15539	0.114858
GO:0006898	receptor-mediated endocytosis	4	2.15539	0.114858
GO:0004713	protein tyrosine kinase activity	5	1.93649	0.116797
GO:0008643	carbohydrate transport	2	3.38005	0.117226
GO:0010821	regulation of mitochondrion organization	2	3.38005	0.117226
GO:0016327	apicolateral plasma membrane	2	3.38005	0.117226
GO:0031674	I band	2	3.38005	0.117226
GO:0035584	calcium-mediated signaling using intracellular calcium source	2	3.38005	0.117226
GO:0045821	positive regulation of glycolytic process	2	3.38005	0.117226
GO:0050321	tau-protein kinase activity	2	3.38005	0.117226
GO:0050905	neuromuscular process	2	3.38005	0.117226
GO:0050908	detection of light stimulus involved in visual perception	2	3.38005	0.117226
GO:0051896	regulation of phosphatidylinositol 3-kinase/protein kinase B signal transduction	2	3.38005	0.117226
GO:0060045	positive regulation of cardiac muscle cell proliferation	2	3.38005	0.117226
GO:0070498	interleukin-1-mediated signaling pathway	2	3.38005	0.117226
GO:0009791	post-embryonic development	4	2.1246	0.11939
GO:0010506	regulation of autophagy	4	2.1246	0.11939
GO:0032922	circadian regulation of gene expression	4	2.1246	0.11939
GO:0042060	wound healing	4	2.1246	0.11939
GO:0001568	blood vessel development	3	2.4787	0.120158
GO:0030020	extracellular matrix structural constituent conferring tensile strength	3	2.4787	0.120158
GO:0042130	negative regulation of T cell proliferation	3	2.4787	0.120158
GO:0001726	ruffle	5	1.91652	0.120599
GO:0007420	brain development	8	1.61655	0.124161
GO:0007517	muscle organ development	5	1.89697	0.124459
GO:0006275	regulation of DNA replication	3	2.42482	0.126121
GO:0008630	intrinsic apoptotic signaling pathway in response to DNA damage	3	2.42482	0.126121
GO:0006672	ceramide metabolic process	2	3.23309	0.126203
GO:0006809	nitric oxide biosynthetic process	2	3.23309	0.126203
GO:0006911	phagocytosis, engulfment	2	3.23309	0.126203
GO:0019934	cGMP-mediated signaling	2	3.23309	0.126203
GO:0021542	dentate gyrus development	2	3.23309	0.126203
GO:0030215	semaphorin receptor binding	2	3.23309	0.126203
GO:0031016	pancreas development	2	3.23309	0.126203
GO:0043236	laminin binding	2	3.23309	0.126203
GO:0048589	developmental growth	2	3.23309	0.126203
GO:0048663	neuron fate commitment	2	3.23309	0.126203
GO:1904706	negative regulation of vascular associated smooth muscle cell proliferation	2	3.23309	0.126203
GO:2000378	negative regulation of reactive oxygen species metabolic process	2	3.23309	0.126203
GO:2001243	negative regulation of intrinsic apoptotic signaling pathway	2	3.23309	0.126203
GO:0030027	lamellipodium	8	1.60781	0.126928
GO:0001653	peptide receptor activity	1	7.43611	0.12745
GO:0001738	morphogenesis of a polarized epithelium	1	7.43611	0.12745
GO:0001757	somite specification	1	7.43611	0.12745
GO:0001992	regulation of systemic arterial blood pressure by vasopressin	1	7.43611	0.12745
GO:0002071	glandular epithelial cell maturation	1	7.43611	0.12745
GO:0002090	regulation of receptor internalization	1	7.43611	0.12745
GO:0002248	connective tissue replacement involved in inflammatory response wound healing	1	7.43611	0.12745
GO:0002309	T cell proliferation involved in immune response	1	7.43611	0.12745
GO:0003176	aortic valve development	1	7.43611	0.12745
GO:0004028	3-chloroallyl aldehyde dehydrogenase activity	1	7.43611	0.12745
GO:0004030	aldehyde dehydrogenase [NAD(P)+] activity	1	7.43611	0.12745
GO:0004464	leukotriene-C4 synthase activity	1	7.43611	0.12745
GO:0005025	transforming growth factor beta receptor activity, type I	1	7.43611	0.12745
GO:0005105	type 1 fibroblast growth factor receptor binding	1	7.43611	0.12745
GO:0005111	type 2 fibroblast growth factor receptor binding	1	7.43611	0.12745
GO:0005134	interleukin-2 receptor binding	1	7.43611	0.12745
GO:0005432	calcium:sodium antiporter activity	1	7.43611	0.12745
GO:0005503	all-trans retinal binding	1	7.43611	0.12745
GO:0005642	annulate lamellae	1	7.43611	0.12745
GO:0006116	NADH oxidation	1	7.43611	0.12745
GO:0006700	C21-steroid hormone biosynthetic process	1	7.43611	0.12745
GO:0006710	androgen catabolic process	1	7.43611	0.12745
GO:0008038	neuron recognition	1	7.43611	0.12745
GO:0008484	sulfuric ester hydrolase activity	1	7.43611	0.12745
GO:0008532	N-acetyllactosaminide beta-1,3-N-acetylglucosaminyltransferase activity	1	7.43611	0.12745
GO:0010810	regulation of cell-substrate adhesion	1	7.43611	0.12745
GO:0010822	positive regulation of mitochondrion organization	1	7.43611	0.12745
GO:0010829	negative regulation of glucose transmembrane transport	1	7.43611	0.12745
GO:0010830	regulation of myotube differentiation	1	7.43611	0.12745
GO:0014706	striated muscle tissue development	1	7.43611	0.12745
GO:0014829	vascular associated smooth muscle contraction	1	7.43611	0.12745
GO:0014905	myoblast fusion involved in skeletal muscle regeneration	1	7.43611	0.12745
GO:0015616	DNA translocase activity	1	7.43611	0.12745
GO:0015860	purine nucleoside transmembrane transport	1	7.43611	0.12745
GO:0017171	serine hydrolase activity	1	7.43611	0.12745
GO:0019210	kinase inhibitor activity	1	7.43611	0.12745
GO:0019530	taurine metabolic process	1	7.43611	0.12745
GO:0021631	optic nerve morphogenesis	1	7.43611	0.12745
GO:0021650	vestibulocochlear nerve formation	1	7.43611	0.12745
GO:0021889	olfactory bulb interneuron differentiation	1	7.43611	0.12745
GO:0022405	hair cycle process	1	7.43611	0.12745
GO:0030947	regulation of vascular endothelial growth factor receptor signaling pathway	1	7.43611	0.12745
GO:0031284	positive regulation of guanylate cyclase activity	1	7.43611	0.12745
GO:0031622	positive regulation of fever generation	1	7.43611	0.12745
GO:0031727	CCR2 chemokine receptor binding	1	7.43611	0.12745
GO:0032010	phagolysosome	1	7.43611	0.12745
GO:0032273	positive regulation of protein polymerization	1	7.43611	0.12745
GO:0032280	symmetric synapse	1	7.43611	0.12745
GO:0033005	positive regulation of mast cell activation	1	7.43611	0.12745
GO:0033157	regulation of intracellular protein transport	1	7.43611	0.12745
GO:0033165	interphotoreceptor matrix	1	7.43611	0.12745
GO:0033363	secretory granule organization	1	7.43611	0.12745
GO:0034112	positive regulation of homotypic cell-cell adhesion	1	7.43611	0.12745
GO:0034382	chylomicron remnant clearance	1	7.43611	0.12745
GO:0035385	Roundabout signaling pathway	1	7.43611	0.12745
GO:0035509	negative regulation of myosin-light-chain-phosphatase activity	1	7.43611	0.12745
GO:0036156	inner dynein arm	1	7.43611	0.12745
GO:0038065	collagen-activated signaling pathway	1	7.43611	0.12745
GO:0042976	activation of Janus kinase activity	1	7.43611	0.12745
GO:0043697	cell dedifferentiation	1	7.43611	0.12745
GO:0044546	NLRP3 inflammasome complex assembly	1	7.43611	0.12745
GO:0044857	plasma membrane raft organization	1	7.43611	0.12745
GO:0045569	TRAIL binding	1	7.43611	0.12745
GO:0045590	negative regulation of regulatory T cell differentiation	1	7.43611	0.12745
GO:0045636	positive regulation of melanocyte differentiation	1	7.43611	0.12745
GO:0045794	negative regulation of cell volume	1	7.43611	0.12745
GO:0045833	negative regulation of lipid metabolic process	1	7.43611	0.12745
GO:0045906	negative regulation of vasoconstriction	1	7.43611	0.12745
GO:0046050	UMP catabolic process	1	7.43611	0.12745
GO:0046069	cGMP catabolic process	1	7.43611	0.12745
GO:0046222	aflatoxin metabolic process	1	7.43611	0.12745
GO:0046473	phosphatidic acid metabolic process	1	7.43611	0.12745
GO:0046850	regulation of bone remodeling	1	7.43611	0.12745
GO:0046870	cadmium ion binding	1	7.43611	0.12745
GO:0048341	paraxial mesoderm formation	1	7.43611	0.12745
GO:0048386	positive regulation of retinoic acid receptor signaling pathway	1	7.43611	0.12745
GO:0048541	Peyer's patch development	1	7.43611	0.12745
GO:0048630	skeletal muscle tissue growth	1	7.43611	0.12745
GO:0048633	positive regulation of skeletal muscle tissue growth	1	7.43611	0.12745
GO:0048645	animal organ formation	1	7.43611	0.12745
GO:0048763	calcium-induced calcium release activity	1	7.43611	0.12745
GO:0050849	negative regulation of calcium-mediated signaling	1	7.43611	0.12745
GO:0050904	diapedesis	1	7.43611	0.12745
GO:0050974	detection of mechanical stimulus involved in sensory perception	1	7.43611	0.12745
GO:0050999	regulation of nitric-oxide synthase activity	1	7.43611	0.12745
GO:0060087	relaxation of vascular associated smooth muscle	1	7.43611	0.12745
GO:0060662	salivary gland cavitation	1	7.43611	0.12745
GO:0060664	epithelial cell proliferation involved in salivary gland morphogenesis	1	7.43611	0.12745
GO:0060841	venous blood vessel development	1	7.43611	0.12745
GO:0060916	mesenchymal cell proliferation involved in lung development	1	7.43611	0.12745
GO:0061044	negative regulation of vascular wound healing	1	7.43611	0.12745
GO:0061419	positive regulation of transcription from RNA polymerase II promoter in response to hypoxia	1	7.43611	0.12745
GO:0070051	fibrinogen binding	1	7.43611	0.12745
GO:0070120	ciliary neurotrophic factor-mediated signaling pathway	1	7.43611	0.12745
GO:0070169	positive regulation of biomineral tissue development	1	7.43611	0.12745
GO:0070296	sarcoplasmic reticulum calcium ion transport	1	7.43611	0.12745
GO:0070424	regulation of nucleotide-binding oligomerization domain containing signaling pathway	1	7.43611	0.12745
GO:0070779	D-aspartate import across plasma membrane	1	7.43611	0.12745
GO:0071284	cellular response to lead ion	1	7.43611	0.12745
GO:0071475	cellular hyperosmotic salinity response	1	7.43611	0.12745
GO:0071504	cellular response to heparin	1	7.43611	0.12745
GO:0071599	otic vesicle development	1	7.43611	0.12745
GO:0071702	organic substance transport	1	7.43611	0.12745
GO:0071705	nitrogen compound transport	1	7.43611	0.12745
GO:0072162	metanephric mesenchymal cell differentiation	1	7.43611	0.12745
GO:0072177	mesonephric duct development	1	7.43611	0.12745
GO:0072201	negative regulation of mesenchymal cell proliferation	1	7.43611	0.12745
GO:0072207	metanephric epithelium development	1	7.43611	0.12745
GO:0072307	regulation of metanephric nephron tubule epithelial cell differentiation	1	7.43611	0.12745
GO:0090205	positive regulation of cholesterol metabolic process	1	7.43611	0.12745
GO:0090370	negative regulation of cholesterol efflux	1	7.43611	0.12745
GO:0097180	serine protease inhibitor complex	1	7.43611	0.12745
GO:0097187	dentinogenesis	1	7.43611	0.12745
GO:0097211	cellular response to gonadotropin-releasing hormone	1	7.43611	0.12745
GO:0097241	hematopoietic stem cell migration to bone marrow	1	7.43611	0.12745
GO:0097411	hypoxia-inducible factor-1alpha signaling pathway	1	7.43611	0.12745
GO:0098636	protein complex involved in cell adhesion	1	7.43611	0.12745
GO:0098735	positive regulation of the force of heart contraction	1	7.43611	0.12745
GO:0098962	regulation of postsynaptic neurotransmitter receptor activity	1	7.43611	0.12745
GO:0099159	regulation of modification of postsynaptic structure	1	7.43611	0.12745
GO:0110053	regulation of actin filament organization	1	7.43611	0.12745
GO:0120044	stereocilium base	1	7.43611	0.12745
GO:0140206	dipeptide import across plasma membrane	1	7.43611	0.12745
GO:0140537	transcription regulator activator activity	1	7.43611	0.12745
GO:0140955	histone H3K36 trimethyltransferase activity	1	7.43611	0.12745
GO:1900020	positive regulation of protein kinase C activity	1	7.43611	0.12745
GO:1900037	regulation of cellular response to hypoxia	1	7.43611	0.12745
GO:1902396	protein localization to bicellular tight junction	1	7.43611	0.12745
GO:1902603	carnitine transmembrane transport	1	7.43611	0.12745
GO:1902817	negative regulation of protein localization to microtubule	1	7.43611	0.12745
GO:1904354	negative regulation of telomere capping	1	7.43611	0.12745
GO:1904358	positive regulation of telomere maintenance via telomere lengthening	1	7.43611	0.12745
GO:1904504	positive regulation of lipophagy	1	7.43611	0.12745
GO:1904906	positive regulation of endothelial cell-matrix adhesion via fibronectin	1	7.43611	0.12745
GO:1990513	CLOCK-BMAL transcription complex	1	7.43611	0.12745
GO:0042826	histone deacetylase binding	6	1.75656	0.127992
GO:0051649	establishment of localization in cell	5	1.87781	0.128376
GO:0004175	endopeptidase activity	4	2.06559	0.12868
GO:0008217	regulation of blood pressure	4	2.06559	0.12868
GO:0005765	lysosomal membrane	14	1.40304	0.128763
GO:0038023	signaling receptor activity	8	1.59916	0.129728
GO:0005938	cell cortex	7	1.65773	0.131447
GO:0034605	cellular response to heat	3	2.37323	0.132187
GO:0097009	energy homeostasis	3	2.37323	0.132187
GO:0120163	negative regulation of cold-induced thermogenesis	3	2.37323	0.132187
GO:0001678	intracellular glucose homeostasis	2	3.09838	0.135336
GO:0002286	T cell activation involved in immune response	2	3.09838	0.135336
GO:0002437	inflammatory response to antigenic stimulus	2	3.09838	0.135336
GO:0014003	oligodendrocyte development	2	3.09838	0.135336
GO:0038095	Fc-epsilon receptor signaling pathway	2	3.09838	0.135336
GO:0051893	regulation of focal adhesion assembly	2	3.09838	0.135336
GO:0032587	ruffle membrane	5	1.84062	0.136374
GO:0042470	melanosome	5	1.84062	0.136374
GO:0006816	calcium ion transport	4	2.00976	0.13826
GO:0008542	visual learning	3	2.32378	0.138354
GO:0010951	negative regulation of endopeptidase activity	3	2.32378	0.138354
GO:0034198	cellular response to amino acid starvation	3	2.32378	0.138354
GO:0000226	microtubule cytoskeleton organization	6	1.71603	0.138489
GO:0005198	structural molecule activity	7	1.62665	0.140946
GO:0009636	response to toxic substance	4	1.98296	0.143155
GO:0055085	transmembrane transport	8	1.5573	0.144198
GO:0046718	viral entry into host cell	5	1.80488	0.144588
GO:0001782	B cell homeostasis	2	2.97444	0.144611
GO:0005539	glycosaminoglycan binding	2	2.97444	0.144611
GO:0008157	protein phosphatase 1 binding	2	2.97444	0.144611
GO:0034237	protein kinase A regulatory subunit binding	2	2.97444	0.144611
GO:0042573	retinoic acid metabolic process	2	2.97444	0.144611
GO:0046697	decidualization	2	2.97444	0.144611
GO:0048844	artery morphogenesis	2	2.97444	0.144611
GO:0090023	positive regulation of neutrophil chemotaxis	2	2.97444	0.144611
GO:1904659	glucose transmembrane transport	2	2.97444	0.144611
GO:0003777	microtubule motor activity	3	2.27636	0.144616
GO:0006094	gluconeogenesis	3	2.27636	0.144616
GO:0015297	antiporter activity	3	2.27636	0.144616
GO:0048013	ephrin receptor signaling pathway	3	2.27636	0.144616
GO:0001666	response to hypoxia	7	1.60657	0.147459
GO:0001558	regulation of cell growth	4	1.95687	0.148117
GO:0007565	female pregnancy	4	1.95687	0.148117
GO:0005200	structural constituent of cytoskeleton	5	1.78753	0.148773
GO:0055038	recycling endosome membrane	5	1.78753	0.148773
GO:0044325	transmembrane transporter binding	6	1.67732	0.149373
GO:0000212	meiotic spindle organization	1	6.19676	0.150924
GO:0000425	pexophagy	1	6.19676	0.150924
GO:0001875	lipopolysaccharide immune receptor activity	1	6.19676	0.150924
GO:0001919	regulation of receptor recycling	1	6.19676	0.150924
GO:0002320	lymphoid progenitor cell differentiation	1	6.19676	0.150924
GO:0002830	positive regulation of type 2 immune response	1	6.19676	0.150924
GO:0003100	regulation of systemic arterial blood pressure by endothelin	1	6.19676	0.150924
GO:0003337	mesenchymal to epithelial transition involved in metanephros morphogenesis	1	6.19676	0.150924
GO:0003402	planar cell polarity pathway involved in axis elongation	1	6.19676	0.150924
GO:0004128	cytochrome-b5 reductase activity, acting on NAD(P)H	1	6.19676	0.150924
GO:0004322	ferroxidase activity	1	6.19676	0.150924
GO:0005003	ephrin receptor activity	1	6.19676	0.150924
GO:0005004	GPI-linked ephrin receptor activity	1	6.19676	0.150924
GO:0005127	ciliary neurotrophic factor receptor binding	1	6.19676	0.150924
GO:0006066	alcohol metabolic process	1	6.19676	0.150924
GO:0006249	dCMP catabolic process	1	6.19676	0.150924
GO:0006565	L-serine catabolic process	1	6.19676	0.150924
GO:0006596	polyamine biosynthetic process	1	6.19676	0.150924
GO:0006682	galactosylceramide biosynthetic process	1	6.19676	0.150924
GO:0006706	steroid catabolic process	1	6.19676	0.150924
GO:0007167	enzyme-linked receptor protein signaling pathway	1	6.19676	0.150924
GO:0007171	activation of transmembrane receptor protein tyrosine kinase activity	1	6.19676	0.150924
GO:0007231	osmosensory signaling pathway	1	6.19676	0.150924
GO:0007589	body fluid secretion	1	6.19676	0.150924
GO:0009609	response to symbiotic bacterium	1	6.19676	0.150924
GO:0009629	response to gravity	1	6.19676	0.150924
GO:0010310	regulation of hydrogen peroxide metabolic process	1	6.19676	0.150924
GO:0010571	positive regulation of nuclear cell cycle DNA replication	1	6.19676	0.150924
GO:0010753	positive regulation of cGMP-mediated signaling	1	6.19676	0.150924
GO:0010754	negative regulation of cGMP-mediated signaling	1	6.19676	0.150924
GO:0010894	negative regulation of steroid biosynthetic process	1	6.19676	0.150924
GO:0014807	regulation of somitogenesis	1	6.19676	0.150924
GO:0014856	skeletal muscle cell proliferation	1	6.19676	0.150924
GO:0015213	uridine transmembrane transporter activity	1	6.19676	0.150924
GO:0015862	uridine transport	1	6.19676	0.150924
GO:0016255	attachment of GPI anchor to protein	1	6.19676	0.150924
GO:0016684	oxidoreductase activity, acting on peroxide as acceptor	1	6.19676	0.150924
GO:0018394	peptidyl-lysine acetylation	1	6.19676	0.150924
GO:0021853	cerebral cortex GABAergic interneuron migration	1	6.19676	0.150924
GO:0021978	telencephalon regionalization	1	6.19676	0.150924
GO:0030311	poly-N-acetyllactosamine biosynthetic process	1	6.19676	0.150924
GO:0030346	protein phosphatase 2B binding	1	6.19676	0.150924
GO:0030550	acetylcholine receptor inhibitor activity	1	6.19676	0.150924
GO:0031000	response to caffeine	1	6.19676	0.150924
GO:0031223	auditory behavior	1	6.19676	0.150924
GO:0031698	beta-2 adrenergic receptor binding	1	6.19676	0.150924
GO:0032210	regulation of telomere maintenance via telomerase	1	6.19676	0.150924
GO:0032813	tumor necrosis factor receptor superfamily binding	1	6.19676	0.150924
GO:0032815	negative regulation of natural killer cell activation	1	6.19676	0.150924
GO:0032911	negative regulation of transforming growth factor beta1 production	1	6.19676	0.150924
GO:0033085	negative regulation of T cell differentiation in thymus	1	6.19676	0.150924
GO:0034616	response to laminar fluid shear stress	1	6.19676	0.150924
GO:0034775	glutathione transmembrane transport	1	6.19676	0.150924
GO:0040012	regulation of locomotion	1	6.19676	0.150924
GO:0042159	lipoprotein catabolic process	1	6.19676	0.150924
GO:0042541	hemoglobin biosynthetic process	1	6.19676	0.150924
GO:0043372	positive regulation of CD4-positive, alpha-beta T cell differentiation	1	6.19676	0.150924
GO:0043457	regulation of cellular respiration	1	6.19676	0.150924
GO:0043535	regulation of blood vessel endothelial cell migration	1	6.19676	0.150924
GO:0043620	regulation of DNA-templated transcription in response to stress	1	6.19676	0.150924
GO:0044206	UMP salvage	1	6.19676	0.150924
GO:0045162	clustering of voltage-gated sodium channels	1	6.19676	0.150924
GO:0045646	regulation of erythrocyte differentiation	1	6.19676	0.150924
GO:0047024	5alpha-androstane-3beta,17beta-diol dehydrogenase activity	1	6.19676	0.150924
GO:0048406	nerve growth factor binding	1	6.19676	0.150924
GO:0048713	regulation of oligodendrocyte differentiation	1	6.19676	0.150924
GO:0050957	equilibrioception	1	6.19676	0.150924
GO:0051155	positive regulation of striated muscle cell differentiation	1	6.19676	0.150924
GO:0051546	keratinocyte migration	1	6.19676	0.150924
GO:0051902	negative regulation of mitochondrial depolarization	1	6.19676	0.150924
GO:0051972	regulation of telomerase activity	1	6.19676	0.150924
GO:0055123	digestive system development	1	6.19676	0.150924
GO:0060363	cranial suture morphogenesis	1	6.19676	0.150924
GO:0060574	intestinal epithelial cell maturation	1	6.19676	0.150924
GO:0060669	embryonic placenta morphogenesis	1	6.19676	0.150924
GO:0060706	cell differentiation involved in embryonic placenta development	1	6.19676	0.150924
GO:0060754	positive regulation of mast cell chemotaxis	1	6.19676	0.150924
GO:0060836	lymphatic endothelial cell differentiation	1	6.19676	0.150924
GO:0061002	negative regulation of dendritic spine morphogenesis	1	6.19676	0.150924
GO:0061037	negative regulation of cartilage development	1	6.19676	0.150924
GO:0062176	R-loop processing	1	6.19676	0.150924
GO:0070086	ubiquitin-dependent endocytosis	1	6.19676	0.150924
GO:0070309	lens fiber cell morphogenesis	1	6.19676	0.150924
GO:0070508	cholesterol import	1	6.19676	0.150924
GO:0070665	positive regulation of leukocyte proliferation	1	6.19676	0.150924
GO:0070938	contractile ring	1	6.19676	0.150924
GO:0071532	ankyrin repeat binding	1	6.19676	0.150924
GO:0072189	ureter development	1	6.19676	0.150924
GO:0072531	pyrimidine-containing compound transmembrane transport	1	6.19676	0.150924
GO:0072655	establishment of protein localization to mitochondrion	1	6.19676	0.150924
GO:0086003	cardiac muscle cell contraction	1	6.19676	0.150924
GO:0097151	positive regulation of inhibitory postsynaptic potential	1	6.19676	0.150924
GO:0097398	cellular response to interleukin-17	1	6.19676	0.150924
GO:0097427	microtubule bundle	1	6.19676	0.150924
GO:0098591	external side of apical plasma membrane	1	6.19676	0.150924
GO:0098802	plasma membrane signaling receptor complex	1	6.19676	0.150924
GO:0098837	postsynaptic recycling endosome	1	6.19676	0.150924
GO:0099604	ligand-gated calcium channel activity	1	6.19676	0.150924
GO:0106435	carboxylesterase activity	1	6.19676	0.150924
GO:0140948	histone H3K9 monomethyltransferase activity	1	6.19676	0.150924
GO:0150011	regulation of neuron projection arborization	1	6.19676	0.150924
GO:1902231	positive regulation of intrinsic apoptotic signaling pathway in response to DNA damage	1	6.19676	0.150924
GO:1903142	positive regulation of establishment of endothelial barrier	1	6.19676	0.150924
GO:1903829	positive regulation of protein localization	1	6.19676	0.150924
GO:1904428	negative regulation of tubulin deacetylation	1	6.19676	0.150924
GO:1904751	positive regulation of protein localization to nucleolus	1	6.19676	0.150924
GO:1905144	response to acetylcholine	1	6.19676	0.150924
GO:1905691	lipid droplet disassembly	1	6.19676	0.150924
GO:1990316	Atg1/ULK1 kinase complex	1	6.19676	0.150924
GO:1990430	extracellular matrix protein binding	1	6.19676	0.150924
GO:1990776	response to angiotensin	1	6.19676	0.150924
GO:1990874	vascular associated smooth muscle cell proliferation	1	6.19676	0.150924
GO:2000210	positive regulation of anoikis	1	6.19676	0.150924
GO:2000323	negative regulation of glucocorticoid receptor signaling pathway	1	6.19676	0.150924
GO:2000427	positive regulation of apoptotic cell clearance	1	6.19676	0.150924
GO:2000987	positive regulation of behavioral fear response	1	6.19676	0.150924
GO:2001236	regulation of extrinsic apoptotic signaling pathway	1	6.19676	0.150924
GO:0048146	positive regulation of fibroblast proliferation	3	2.23083	0.150969
GO:0007169	transmembrane receptor protein tyrosine kinase signaling pathway	5	1.7705	0.153009
GO:0004622	lysophospholipase activity	2	2.86004	0.154013
GO:0007026	negative regulation of microtubule depolymerization	2	2.86004	0.154013
GO:0009954	proximal/distal pattern formation	2	2.86004	0.154013
GO:0032753	positive regulation of interleukin-4 production	2	2.86004	0.154013
GO:0045453	bone resorption	2	2.86004	0.154013
GO:0045742	positive regulation of epidermal growth factor receptor signaling pathway	2	2.86004	0.154013
GO:0051018	protein kinase A binding	2	2.86004	0.154013
GO:0070382	exocytic vesicle	2	2.86004	0.154013
GO:0098632	cell-cell adhesion mediator activity	2	2.86004	0.154013
GO:1900017	positive regulation of cytokine production involved in inflammatory response	2	2.86004	0.154013
GO:0090630	activation of GTPase activity	5	1.7538	0.157295
GO:0030324	lung development	4	1.9067	0.158237
GO:0043123	positive regulation of canonical NF-kappaB signal transduction	8	1.51757	0.159428
GO:0009615	response to virus	5	1.73741	0.16163
GO:0001933	negative regulation of protein phosphorylation	4	1.88256	0.16339
GO:0004601	peroxidase activity	2	2.75412	0.163529
GO:0021510	spinal cord development	2	2.75412	0.163529
GO:0032590	dendrite membrane	2	2.75412	0.163529
GO:0038061	non-canonical NF-kappaB signal transduction	2	2.75412	0.163529
GO:0045954	positive regulation of natural killer cell mediated cytotoxicity	2	2.75412	0.163529
GO:0048020	CCR chemokine receptor binding	2	2.75412	0.163529
GO:0048714	positive regulation of oligodendrocyte differentiation	2	2.75412	0.163529
GO:0030148	sphingolipid biosynthetic process	3	2.14503	0.163934
GO:0065003	protein-containing complex assembly	6	1.62835	0.164461
GO:0005815	microtubule organizing center	5	1.72132	0.166013
GO:0007193	adenylate cyclase-inhibiting G protein-coupled receptor signaling pathway	3	2.10456	0.170537
GO:0022900	electron transport chain	3	2.10456	0.170537
GO:0051209	release of sequestered calcium ion into cytosol	3	2.10456	0.170537
GO:0120009	intermembrane lipid transfer	3	2.10456	0.170537
GO:0004674	protein serine/threonine kinase activity	13	1.34637	0.172123
GO:0001891	phagocytic cup	2	2.65575	0.173146
GO:0006261	DNA-templated DNA replication	2	2.65575	0.173146
GO:0010592	positive regulation of lamellipodium assembly	2	2.65575	0.173146
GO:0044344	cellular response to fibroblast growth factor stimulus	2	2.65575	0.173146
GO:0045499	chemorepellent activity	2	2.65575	0.173146
GO:0048843	negative regulation of axon extension involved in axon guidance	2	2.65575	0.173146
GO:0051497	negative regulation of stress fiber assembly	2	2.65575	0.173146
GO:0051959	dynein light intermediate chain binding	2	2.65575	0.173146
GO:0090102	cochlea development	2	2.65575	0.173146
GO:1900745	positive regulation of p38MAPK cascade	2	2.65575	0.173146
GO:1902042	negative regulation of extrinsic apoptotic signaling pathway via death domain receptors	2	2.65575	0.173146
GO:0001542	ovulation from ovarian follicle	1	5.31151	0.173768
GO:0001740	Barr body	1	5.31151	0.173768
GO:0001816	cytokine production	1	5.31151	0.173768
GO:0001957	intramembranous ossification	1	5.31151	0.173768
GO:0002933	lipid hydroxylation	1	5.31151	0.173768
GO:0003406	retinal pigment epithelium development	1	5.31151	0.173768
GO:0004675	transmembrane receptor protein serine/threonine kinase activity	1	5.31151	0.173768
GO:0005000	vasopressin receptor activity	1	5.31151	0.173768
GO:0005138	interleukin-6 receptor binding	1	5.31151	0.173768
GO:0005412	glucose:sodium symporter activity	1	5.31151	0.173768
GO:0005502	11-cis retinal binding	1	5.31151	0.173768
GO:0006020	inositol metabolic process	1	5.31151	0.173768
GO:0006312	mitotic recombination	1	5.31151	0.173768
GO:0006527	arginine catabolic process	1	5.31151	0.173768
GO:0006544	glycine metabolic process	1	5.31151	0.173768
GO:0006929	substrate-dependent cell migration	1	5.31151	0.173768
GO:0007198	adenylate cyclase-inhibiting serotonin receptor signaling pathway	1	5.31151	0.173768
GO:0007221	positive regulation of transcription of Notch receptor target	1	5.31151	0.173768
GO:0007501	mesodermal cell fate specification	1	5.31151	0.173768
GO:0008063	Toll signaling pathway	1	5.31151	0.173768
GO:0008287	protein serine/threonine phosphatase complex	1	5.31151	0.173768
GO:0010882	regulation of cardiac muscle contraction by calcium ion signaling	1	5.31151	0.173768
GO:0010886	positive regulation of cholesterol storage	1	5.31151	0.173768
GO:0014049	positive regulation of glutamate secretion	1	5.31151	0.173768
GO:0014902	myotube differentiation	1	5.31151	0.173768
GO:0015220	choline transmembrane transporter activity	1	5.31151	0.173768
GO:0015808	L-alanine transport	1	5.31151	0.173768
GO:0016936	galactoside binding	1	5.31151	0.173768
GO:0019217	regulation of fatty acid metabolic process	1	5.31151	0.173768
GO:0021796	cerebral cortex regionalization	1	5.31151	0.173768
GO:0021884	forebrain neuron development	1	5.31151	0.173768
GO:0022829	wide pore channel activity	1	5.31151	0.173768
GO:0030011	maintenance of cell polarity	1	5.31151	0.173768
GO:0030213	hyaluronan biosynthetic process	1	5.31151	0.173768
GO:0030258	lipid modification	1	5.31151	0.173768
GO:0030856	regulation of epithelial cell differentiation	1	5.31151	0.173768
GO:0030911	TPR domain binding	1	5.31151	0.173768
GO:0031394	positive regulation of prostaglandin biosynthetic process	1	5.31151	0.173768
GO:0032288	myelin assembly	1	5.31151	0.173768
GO:0032328	alanine transport	1	5.31151	0.173768
GO:0032411	positive regulation of transporter activity	1	5.31151	0.173768
GO:0032494	response to peptidoglycan	1	5.31151	0.173768
GO:0032713	negative regulation of interleukin-4 production	1	5.31151	0.173768
GO:0033673	negative regulation of kinase activity	1	5.31151	0.173768
GO:0034087	establishment of mitotic sister chromatid cohesion	1	5.31151	0.173768
GO:0034121	regulation of toll-like receptor signaling pathway	1	5.31151	0.173768
GO:0034392	negative regulation of smooth muscle cell apoptotic process	1	5.31151	0.173768
GO:0034405	response to fluid shear stress	1	5.31151	0.173768
GO:0034440	lipid oxidation	1	5.31151	0.173768
GO:0035137	hindlimb morphogenesis	1	5.31151	0.173768
GO:0035336	long-chain fatty-acyl-CoA metabolic process	1	5.31151	0.173768
GO:0035524	proline transmembrane transport	1	5.31151	0.173768
GO:0035771	interleukin-4-mediated signaling pathway	1	5.31151	0.173768
GO:0036438	maintenance of lens transparency	1	5.31151	0.173768
GO:0036500	ATF6-mediated unfolded protein response	1	5.31151	0.173768
GO:0038113	interleukin-9-mediated signaling pathway	1	5.31151	0.173768
GO:0038203	TORC2 signaling	1	5.31151	0.173768
GO:0042063	gliogenesis	1	5.31151	0.173768
GO:0042392	sphingosine-1-phosphate phosphatase activity	1	5.31151	0.173768
GO:0042698	ovulation cycle	1	5.31151	0.173768
GO:0042994	cytoplasmic sequestering of transcription factor	1	5.31151	0.173768
GO:0043203	axon hillock	1	5.31151	0.173768
GO:0043353	enucleate erythrocyte differentiation	1	5.31151	0.173768
GO:0043615	astrocyte cell migration	1	5.31151	0.173768
GO:0044351	macropinocytosis	1	5.31151	0.173768
GO:0045576	mast cell activation	1	5.31151	0.173768
GO:0045630	positive regulation of T-helper 2 cell differentiation	1	5.31151	0.173768
GO:0045656	negative regulation of monocyte differentiation	1	5.31151	0.173768
GO:0045762	positive regulation of adenylate cyclase activity	1	5.31151	0.173768
GO:0046653	tetrahydrofolate metabolic process	1	5.31151	0.173768
GO:0048382	mesendoderm development	1	5.31151	0.173768
GO:0048842	positive regulation of axon extension involved in axon guidance	1	5.31151	0.173768
GO:0048864	stem cell development	1	5.31151	0.173768
GO:0050544	arachidonic acid binding	1	5.31151	0.173768
GO:0050688	regulation of defense response to virus	1	5.31151	0.173768
GO:0050793	regulation of developmental process	1	5.31151	0.173768
GO:0050859	negative regulation of B cell receptor signaling pathway	1	5.31151	0.173768
GO:0050869	negative regulation of B cell activation	1	5.31151	0.173768
GO:0050882	voluntary musculoskeletal movement	1	5.31151	0.173768
GO:0050920	regulation of chemotaxis	1	5.31151	0.173768
GO:0050996	positive regulation of lipid catabolic process	1	5.31151	0.173768
GO:0051223	regulation of protein transport	1	5.31151	0.173768
GO:0060428	lung epithelium development	1	5.31151	0.173768
GO:0060463	lung lobe morphogenesis	1	5.31151	0.173768
GO:0061101	neuroendocrine cell differentiation	1	5.31151	0.173768
GO:0061154	endothelial tube morphogenesis	1	5.31151	0.173768
GO:0061470	T follicular helper cell differentiation	1	5.31151	0.173768
GO:0070100	negative regulation of chemokine-mediated signaling pathway	1	5.31151	0.173768
GO:0070106	interleukin-27-mediated signaling pathway	1	5.31151	0.173768
GO:0070728	leucine binding	1	5.31151	0.173768
GO:0070776	MOZ/MORF histone acetyltransferase complex	1	5.31151	0.173768
GO:0070852	cell body fiber	1	5.31151	0.173768
GO:0071218	cellular response to misfolded protein	1	5.31151	0.173768
GO:0071321	cellular response to cGMP	1	5.31151	0.173768
GO:0071499	cellular response to laminar fluid shear stress	1	5.31151	0.173768
GO:0072075	metanephric mesenchyme development	1	5.31151	0.173768
GO:0090027	negative regulation of monocyte chemotaxis	1	5.31151	0.173768
GO:0099536	synaptic signaling	1	5.31151	0.173768
GO:0106256	hydroperoxy icosatetraenoate dehydratase activity	1	5.31151	0.173768
GO:0140947	histone H3K9me2 methyltransferase activity	1	5.31151	0.173768
GO:1901642	nucleoside transmembrane transport	1	5.31151	0.173768
GO:1901888	regulation of cell junction assembly	1	5.31151	0.173768
GO:1901985	positive regulation of protein acetylation	1	5.31151	0.173768
GO:1903348	positive regulation of bicellular tight junction assembly	1	5.31151	0.173768
GO:1903401	L-lysine transmembrane transport	1	5.31151	0.173768
GO:1903432	regulation of TORC1 signaling	1	5.31151	0.173768
GO:1903588	negative regulation of blood vessel endothelial cell proliferation involved in sprouting angiogenesis	1	5.31151	0.173768
GO:1903599	positive regulation of autophagy of mitochondrion	1	5.31151	0.173768
GO:1903659	regulation of complement-dependent cytotoxicity	1	5.31151	0.173768
GO:1904037	positive regulation of epithelial cell apoptotic process	1	5.31151	0.173768
GO:1904781	positive regulation of protein localization to centrosome	1	5.31151	0.173768
GO:1904823	purine nucleobase transmembrane transport	1	5.31151	0.173768
GO:1904951	positive regulation of establishment of protein localization	1	5.31151	0.173768
GO:1990414	replication-born double-strand break repair via sister chromatid exchange	1	5.31151	0.173768
GO:2000270	negative regulation of fibroblast apoptotic process	1	5.31151	0.173768
GO:2000404	regulation of T cell migration	1	5.31151	0.173768
GO:2000726	negative regulation of cardiac muscle cell differentiation	1	5.31151	0.173768
GO:2000727	positive regulation of cardiac muscle cell differentiation	1	5.31151	0.173768
GO:0008544	epidermis development	4	1.83608	0.173874
GO:0106310	protein serine kinase activity	13	1.34263	0.17451
GO:0005667	transcription regulator complex	8	1.47982	0.175379
GO:0045121	membrane raft	8	1.47982	0.175379
GO:0032991	protein-containing complex	21	1.24727	0.176816
GO:0007187	G protein-coupled receptor signaling pathway, coupled to cyclic nucleotide second messenger	3	2.06559	0.177215
GO:0030864	cortical actin cytoskeleton	3	2.06559	0.177215
GO:0032154	cleavage furrow	3	2.06559	0.177215
GO:0050680	negative regulation of epithelial cell proliferation	3	2.06559	0.177215
GO:0007166	cell surface receptor signaling pathway	9	1.43616	0.177581
GO:0071456	cellular response to hypoxia	5	1.6748	0.179436
GO:0007010	cytoskeleton organization	6	1.58215	0.180167
GO:0001708	cell fate specification	2	2.56418	0.182852
GO:0001968	fibronectin binding	2	2.56418	0.182852
GO:0004693	cyclin-dependent protein serine/threonine kinase activity	2	2.56418	0.182852
GO:0005267	potassium channel activity	2	2.56418	0.182852
GO:0007094	mitotic spindle assembly checkpoint signaling	2	2.56418	0.182852
GO:0007214	gamma-aminobutyric acid signaling pathway	2	2.56418	0.182852
GO:0007631	feeding behavior	2	2.56418	0.182852
GO:0045664	regulation of neuron differentiation	2	2.56418	0.182852
GO:0045671	negative regulation of osteoclast differentiation	2	2.56418	0.182852
GO:0048010	vascular endothelial growth factor receptor signaling pathway	2	2.56418	0.182852
GO:0070273	phosphatidylinositol-4-phosphate binding	2	2.56418	0.182852
GO:0097421	liver regeneration	2	2.56418	0.182852
GO:2001238	positive regulation of extrinsic apoptotic signaling pathway	2	2.56418	0.182852
GO:0005544	calcium-dependent phospholipid binding	3	2.02803	0.183963
GO:0045165	cell fate commitment	3	2.02803	0.183963
GO:1904724	tertiary granule lumen	3	2.02803	0.183963
GO:0042802	identical protein binding	47	1.14215	0.187446
GO:0035725	sodium ion transmembrane transport	5	1.64516	0.188603
GO:0006986	response to unfolded protein	3	1.99182	0.190779
GO:0007254	JNK cascade	3	1.99182	0.190779
GO:0030514	negative regulation of BMP signaling pathway	3	1.99182	0.190779
GO:0001656	metanephros development	2	2.4787	0.192634
GO:0002102	podosome	2	2.4787	0.192634
GO:0005721	pericentric heterochromatin	2	2.4787	0.192634
GO:0021915	neural tube development	2	2.4787	0.192634
GO:0030878	thyroid gland development	2	2.4787	0.192634
GO:0031032	actomyosin structure organization	2	2.4787	0.192634
GO:0045840	positive regulation of mitotic nuclear division	2	2.4787	0.192634
GO:0099171	presynaptic modulation of chemical synaptic transmission	2	2.4787	0.192634
GO:0001228	DNA-binding transcription activator activity, RNA polymerase II-specific	16	1.27385	0.193567
GO:0050829	defense response to Gram-negative bacterium	4	1.74967	0.195499
GO:0001758	retinal dehydrogenase activity	1	4.64757	0.195998
GO:0002070	epithelial cell maturation	1	4.64757	0.195998
GO:0002232	leukocyte chemotaxis involved in inflammatory response	1	4.64757	0.195998
GO:0002638	negative regulation of immunoglobulin production	1	4.64757	0.195998
GO:0002821	positive regulation of adaptive immune response	1	4.64757	0.195998
GO:0003084	positive regulation of systemic arterial blood pressure	1	4.64757	0.195998
GO:0003283	atrial septum development	1	4.64757	0.195998
GO:0004169	dolichyl-phosphate-mannose-protein mannosyltransferase activity	1	4.64757	0.195998
GO:0004383	guanylate cyclase activity	1	4.64757	0.195998
GO:0005113	patched binding	1	4.64757	0.195998
GO:0006029	proteoglycan metabolic process	1	4.64757	0.195998
GO:0006089	lactate metabolic process	1	4.64757	0.195998
GO:0006369	termination of RNA polymerase II transcription	1	4.64757	0.195998
GO:0007143	female meiotic nuclear division	1	4.64757	0.195998
GO:0008142	oxysterol binding	1	4.64757	0.195998
GO:0008595	anterior/posterior axis specification, embryo	1	4.64757	0.195998
GO:0009743	response to carbohydrate	1	4.64757	0.195998
GO:0009950	dorsal/ventral axis specification	1	4.64757	0.195998
GO:0010466	negative regulation of peptidase activity	1	4.64757	0.195998
GO:0010827	regulation of glucose transmembrane transport	1	4.64757	0.195998
GO:0014731	spectrin-associated cytoskeleton	1	4.64757	0.195998
GO:0015174	basic amino acid transmembrane transporter activity	1	4.64757	0.195998
GO:0015193	L-proline transmembrane transporter activity	1	4.64757	0.195998
GO:0015349	thyroid hormone transmembrane transporter activity	1	4.64757	0.195998
GO:0015734	taurine transport	1	4.64757	0.195998
GO:0016015	morphogen activity	1	4.64757	0.195998
GO:0017162	aryl hydrocarbon receptor binding	1	4.64757	0.195998
GO:0019871	sodium channel inhibitor activity	1	4.64757	0.195998
GO:0021930	cerebellar granule cell precursor proliferation	1	4.64757	0.195998
GO:0030212	hyaluronan metabolic process	1	4.64757	0.195998
GO:0030548	acetylcholine receptor regulator activity	1	4.64757	0.195998
GO:0030976	thiamine pyrophosphate binding	1	4.64757	0.195998
GO:0032036	myosin heavy chain binding	1	4.64757	0.195998
GO:0032364	intracellular oxygen homeostasis	1	4.64757	0.195998
GO:0032825	positive regulation of natural killer cell differentiation	1	4.64757	0.195998
GO:0033993	response to lipid	1	4.64757	0.195998
GO:0034372	very-low-density lipoprotein particle remodeling	1	4.64757	0.195998
GO:0034751	aryl hydrocarbon receptor complex	1	4.64757	0.195998
GO:0035627	ceramide transport	1	4.64757	0.195998
GO:0035912	dorsal aorta morphogenesis	1	4.64757	0.195998
GO:0036057	slit diaphragm	1	4.64757	0.195998
GO:0036289	peptidyl-serine autophosphorylation	1	4.64757	0.195998
GO:0038110	interleukin-2-mediated signaling pathway	1	4.64757	0.195998
GO:0040011	locomotion	1	4.64757	0.195998
GO:0042609	CD4 receptor binding	1	4.64757	0.195998
GO:0042731	PH domain binding	1	4.64757	0.195998
GO:0042756	drinking behavior	1	4.64757	0.195998
GO:0043320	natural killer cell degranulation	1	4.64757	0.195998
GO:0044788	modulation by host of viral process	1	4.64757	0.195998
GO:0045141	meiotic telomere clustering	1	4.64757	0.195998
GO:0045542	positive regulation of cholesterol biosynthetic process	1	4.64757	0.195998
GO:0045652	regulation of megakaryocyte differentiation	1	4.64757	0.195998
GO:0045823	positive regulation of heart contraction	1	4.64757	0.195998
GO:0046632	alpha-beta T cell differentiation	1	4.64757	0.195998
GO:0046903	secretion	1	4.64757	0.195998
GO:0047023	androsterone dehydrogenase activity	1	4.64757	0.195998
GO:0047035	testosterone dehydrogenase (NAD+) activity	1	4.64757	0.195998
GO:0048495	Roundabout binding	1	4.64757	0.195998
GO:0048667	cell morphogenesis involved in neuron differentiation	1	4.64757	0.195998
GO:0050691	regulation of defense response to virus by host	1	4.64757	0.195998
GO:0051213	dioxygenase activity	1	4.64757	0.195998
GO:0051246	regulation of protein metabolic process	1	4.64757	0.195998
GO:0051782	negative regulation of cell division	1	4.64757	0.195998
GO:0060371	regulation of atrial cardiac muscle cell membrane depolarization	1	4.64757	0.195998
GO:0060426	lung vasculature development	1	4.64757	0.195998
GO:0060452	positive regulation of cardiac muscle contraction	1	4.64757	0.195998
GO:0060509	type I pneumocyte differentiation	1	4.64757	0.195998
GO:0060767	epithelial cell proliferation involved in prostate gland development	1	4.64757	0.195998
GO:0070293	renal absorption	1	4.64757	0.195998
GO:0071144	heteromeric SMAD protein complex	1	4.64757	0.195998
GO:0071559	response to transforming growth factor beta	1	4.64757	0.195998
GO:0072015	podocyte development	1	4.64757	0.195998
GO:0072559	NLRP3 inflammasome complex	1	4.64757	0.195998
GO:0072594	establishment of protein localization to organelle	1	4.64757	0.195998
GO:0080135	regulation of cellular response to stress	1	4.64757	0.195998
GO:0090650	cellular response to oxygen-glucose deprivation	1	4.64757	0.195998
GO:0097237	cellular response to toxic substance	1	4.64757	0.195998
GO:0099641	anterograde axonal protein transport	1	4.64757	0.195998
GO:0101020	estrogen 16-alpha-hydroxylase activity	1	4.64757	0.195998
GO:0120013	lipid transfer activity	1	4.64757	0.195998
GO:0140110	transcription regulator activity	1	4.64757	0.195998
GO:0150012	positive regulation of neuron projection arborization	1	4.64757	0.195998
GO:0150105	protein localization to cell-cell junction	1	4.64757	0.195998
GO:0170014	ankyrin-1 complex	1	4.64757	0.195998
GO:1900180	regulation of protein localization to nucleus	1	4.64757	0.195998
GO:1901798	positive regulation of signal transduction by p53 class mediator	1	4.64757	0.195998
GO:1902807	negative regulation of cell cycle G1/S phase transition	1	4.64757	0.195998
GO:1903670	regulation of sprouting angiogenesis	1	4.64757	0.195998
GO:1905461	positive regulation of vascular associated smooth muscle cell apoptotic process	1	4.64757	0.195998
GO:1990712	HFE-transferrin receptor complex	1	4.64757	0.195998
GO:2000171	negative regulation of dendrite development	1	4.64757	0.195998
GO:2000177	regulation of neural precursor cell proliferation	1	4.64757	0.195998
GO:2000556	positive regulation of T-helper 1 cell cytokine production	1	4.64757	0.195998
GO:2000641	regulation of early endosome to late endosome transport	1	4.64757	0.195998
GO:2000678	negative regulation of transcription regulatory region DNA binding	1	4.64757	0.195998
GO:2001069	glycogen binding	1	4.64757	0.195998
GO:0043547	positive regulation of GTPase activity	6	1.53851	0.196447
GO:0042110	T cell activation	3	1.95687	0.197658
GO:1905515	non-motile cilium assembly	3	1.95687	0.197658
GO:0005694	chromosome	8	1.43002	0.198839
GO:0001975	response to amphetamine	2	2.39875	0.202482
GO:0004181	metallocarboxypeptidase activity	2	2.39875	0.202482
GO:0004519	endonuclease activity	2	2.39875	0.202482
GO:0005640	nuclear outer membrane	2	2.39875	0.202482
GO:0006654	phosphatidic acid biosynthetic process	2	2.39875	0.202482
GO:0007131	reciprocal meiotic recombination	2	2.39875	0.202482
GO:0035987	endodermal cell differentiation	2	2.39875	0.202482
GO:0040018	positive regulation of multicellular organism growth	2	2.39875	0.202482
GO:0048469	cell maturation	2	2.39875	0.202482
GO:0048706	embryonic skeletal system development	2	2.39875	0.202482
GO:0048873	homeostasis of number of cells within a tissue	2	2.39875	0.202482
GO:0070328	triglyceride homeostasis	2	2.39875	0.202482
GO:0140693	molecular condensate scaffold activity	2	2.39875	0.202482
GO:2001244	positive regulation of intrinsic apoptotic signaling pathway	2	2.39875	0.202482
GO:0000165	MAPK cascade	5	1.60261	0.202659
GO:0009055	electron transfer activity	3	1.92313	0.204595
GO:0010507	negative regulation of autophagy	3	1.92313	0.204595
GO:0070374	positive regulation of ERK1 and ERK2 cascade	8	1.4164	0.205767
GO:0030054	cell junction	7	1.45399	0.208089
GO:0009749	response to glucose	3	1.89054	0.211588
GO:0016301	kinase activity	3	1.89054	0.211588
GO:0034451	centriolar satellite	5	1.57545	0.21222
GO:0046330	positive regulation of JNK cascade	4	1.69003	0.212232
GO:0007389	pattern specification process	2	2.32378	0.212386
GO:0007628	adult walking behavior	2	2.32378	0.212386
GO:0010719	negative regulation of epithelial to mesenchymal transition	2	2.32378	0.212386
GO:0016239	positive regulation of macroautophagy	2	2.32378	0.212386
GO:0030100	regulation of endocytosis	2	2.32378	0.212386
GO:0030225	macrophage differentiation	2	2.32378	0.212386
GO:0032008	positive regulation of TOR signaling	2	2.32378	0.212386
GO:0043122	regulation of canonical NF-kappaB signal transduction	2	2.32378	0.212386
GO:0045824	negative regulation of innate immune response	2	2.32378	0.212386
GO:0045931	positive regulation of mitotic cell cycle	2	2.32378	0.212386
GO:0070050	neuron cellular homeostasis	2	2.32378	0.212386
GO:0070372	regulation of ERK1 and ERK2 cascade	2	2.32378	0.212386
GO:0043204	perikaryon	6	1.4972	0.213252
GO:0000288	nuclear-transcribed mRNA catabolic process, deadenylation-dependent decay	1	4.13117	0.217632
GO:0001768	establishment of T cell polarity	1	4.13117	0.217632
GO:0002315	marginal zone B cell differentiation	1	4.13117	0.217632
GO:0002526	acute inflammatory response	1	4.13117	0.217632
GO:0003143	embryonic heart tube morphogenesis	1	4.13117	0.217632
GO:0003254	regulation of membrane depolarization	1	4.13117	0.217632
GO:0003416	endochondral bone growth	1	4.13117	0.217632
GO:0003810	protein-glutamine gamma-glutamyltransferase activity	1	4.13117	0.217632
GO:0003993	acid phosphatase activity	1	4.13117	0.217632
GO:0004465	lipoprotein lipase activity	1	4.13117	0.217632
GO:0005943	phosphatidylinositol 3-kinase complex, class IA	1	4.13117	0.217632
GO:0006107	oxaloacetate metabolic process	1	4.13117	0.217632
GO:0006670	sphingosine metabolic process	1	4.13117	0.217632
GO:0006702	androgen biosynthetic process	1	4.13117	0.217632
GO:0006751	glutathione catabolic process	1	4.13117	0.217632
GO:0006930	substrate-dependent cell migration, cell extension	1	4.13117	0.217632
GO:0007341	penetration of zona pellucida	1	4.13117	0.217632
GO:0007599	hemostasis	1	4.13117	0.217632
GO:0007603	phototransduction, visible light	1	4.13117	0.217632
GO:0008091	spectrin	1	4.13117	0.217632
GO:0008417	fucosyltransferase activity	1	4.13117	0.217632
GO:0008568	microtubule severing ATPase activity	1	4.13117	0.217632
GO:0010738	regulation of protein kinase A signaling	1	4.13117	0.217632
GO:0010890	positive regulation of sequestering of triglyceride	1	4.13117	0.217632
GO:0014701	junctional sarcoplasmic reticulum membrane	1	4.13117	0.217632
GO:0014808	release of sequestered calcium ion into cytosol by sarcoplasmic reticulum	1	4.13117	0.217632
GO:0015278	calcium-release channel activity	1	4.13117	0.217632
GO:0015871	choline transport	1	4.13117	0.217632
GO:0019371	cyclooxygenase pathway	1	4.13117	0.217632
GO:0019674	NAD metabolic process	1	4.13117	0.217632
GO:0021952	central nervous system projection neuron axonogenesis	1	4.13117	0.217632
GO:0030953	astral microtubule organization	1	4.13117	0.217632
GO:0031509	subtelomeric heterochromatin formation	1	4.13117	0.217632
GO:0031642	negative regulation of myelination	1	4.13117	0.217632
GO:0031932	TORC2 complex	1	4.13117	0.217632
GO:0032059	bleb	1	4.13117	0.217632
GO:0032479	regulation of type I interferon production	1	4.13117	0.217632
GO:0032886	regulation of microtubule-based process	1	4.13117	0.217632
GO:0032933	SREBP signaling pathway	1	4.13117	0.217632
GO:0034109	homotypic cell-cell adhesion	1	4.13117	0.217632
GO:0035095	behavioral response to nicotine	1	4.13117	0.217632
GO:0035357	peroxisome proliferator activated receptor signaling pathway	1	4.13117	0.217632
GO:0035999	tetrahydrofolate interconversion	1	4.13117	0.217632
GO:0036148	phosphatidylglycerol acyl-chain remodeling	1	4.13117	0.217632
GO:0036408	histone H3K14 acetyltransferase activity	1	4.13117	0.217632
GO:0042355	L-fucose catabolic process	1	4.13117	0.217632
GO:0042641	actomyosin	1	4.13117	0.217632
GO:0043184	vascular endothelial growth factor receptor 2 binding	1	4.13117	0.217632
GO:0044597	daunorubicin metabolic process	1	4.13117	0.217632
GO:0046888	negative regulation of hormone secretion	1	4.13117	0.217632
GO:0047044	androstan-3-alpha,17-beta-diol dehydrogenase activity	1	4.13117	0.217632
GO:0047045	testosterone 17-beta-dehydrogenase (NADP+) activity	1	4.13117	0.217632
GO:0048617	embryonic foregut morphogenesis	1	4.13117	0.217632
GO:0048806	genitalia development	1	4.13117	0.217632
GO:0050805	negative regulation of synaptic transmission	1	4.13117	0.217632
GO:0050953	sensory perception of light stimulus	1	4.13117	0.217632
GO:0051122	hepoxilin biosynthetic process	1	4.13117	0.217632
GO:0051639	actin filament network formation	1	4.13117	0.217632
GO:0060042	retina morphogenesis in camera-type eye	1	4.13117	0.217632
GO:0060231	mesenchymal to epithelial transition	1	4.13117	0.217632
GO:0060544	regulation of necroptotic process	1	4.13117	0.217632
GO:0061702	canonical inflammasome complex	1	4.13117	0.217632
GO:0070097	delta-catenin binding	1	4.13117	0.217632
GO:0072006	nephron development	1	4.13117	0.217632
GO:0090037	positive regulation of protein kinase C signaling	1	4.13117	0.217632
GO:0090150	establishment of protein localization to membrane	1	4.13117	0.217632
GO:0098637	protein complex involved in cell-matrix adhesion	1	4.13117	0.217632
GO:0106015	negative regulation of inflammatory response to wounding	1	4.13117	0.217632
GO:1900744	regulation of p38MAPK cascade	1	4.13117	0.217632
GO:1901990	regulation of mitotic cell cycle phase transition	1	4.13117	0.217632
GO:1902035	positive regulation of hematopoietic stem cell proliferation	1	4.13117	0.217632
GO:1902806	regulation of cell cycle G1/S phase transition	1	4.13117	0.217632
GO:1902966	positive regulation of protein localization to early endosome	1	4.13117	0.217632
GO:1903136	cuprous ion binding	1	4.13117	0.217632
GO:1905146	lysosomal protein catabolic process	1	4.13117	0.217632
GO:2000096	positive regulation of Wnt signaling pathway, planar cell polarity pathway	1	4.13117	0.217632
GO:2000271	positive regulation of fibroblast apoptotic process	1	4.13117	0.217632
GO:2000553	positive regulation of T-helper 2 cell cytokine production	1	4.13117	0.217632
GO:0005515	protein binding	346	1.02522	0.221538
GO:0001707	mesoderm formation	2	2.25337	0.222334
GO:0019369	arachidonic acid metabolic process	2	2.25337	0.222334
GO:0031069	hair follicle morphogenesis	2	2.25337	0.222334
GO:0032420	stereocilium	2	2.25337	0.222334
GO:0035115	embryonic forelimb morphogenesis	2	2.25337	0.222334
GO:0035869	ciliary transition zone	2	2.25337	0.222334
GO:0045787	positive regulation of cell cycle	2	2.25337	0.222334
GO:0046513	ceramide biosynthetic process	2	2.25337	0.222334
GO:0050873	brown fat cell differentiation	2	2.25337	0.222334
GO:0035579	specific granule membrane	4	1.65247	0.223602
GO:0050727	regulation of inflammatory response	4	1.65247	0.223602
GO:0000166	nucleotide binding	3	1.82855	0.225723
GO:0007018	microtubule-based movement	3	1.82855	0.225723
GO:0030168	platelet activation	3	1.82855	0.225723
GO:0048018	receptor ligand activity	3	1.82855	0.225723
GO:0002040	sprouting angiogenesis	2	2.18709	0.232318
GO:0007528	neuromuscular junction development	2	2.18709	0.232318
GO:0042113	B cell activation	2	2.18709	0.232318
GO:0051966	regulation of synaptic transmission, glutamatergic	2	2.18709	0.232318
GO:0060612	adipose tissue development	2	2.18709	0.232318
GO:0070555	response to interleukin-1	2	2.18709	0.232318
GO:0000281	mitotic cytokinesis	3	1.79906	0.232858
GO:0030139	endocytic vesicle	3	1.79906	0.232858
GO:0035580	specific granule lumen	3	1.79906	0.232858
GO:0030154	cell differentiation	19	1.20346	0.234907
GO:0016055	Wnt signaling pathway	6	1.44859	0.234922
GO:0032869	cellular response to insulin stimulus	4	1.61655	0.235126
GO:0031267	small GTPase binding	10	1.30917	0.236181
GO:0008104	protein localization	5	1.5114	0.236718
GO:0001759	organ induction	1	3.71806	0.238684
GO:0002467	germinal center formation	1	3.71806	0.238684
GO:0003197	endocardial cushion development	1	3.71806	0.238684
GO:0003334	keratinocyte development	1	3.71806	0.238684
GO:0003680	minor groove of adenine-thymine-rich DNA binding	1	3.71806	0.238684
GO:0004114	3',5'-cyclic-nucleotide phosphodiesterase activity	1	3.71806	0.238684
GO:0005024	transforming growth factor beta receptor activity	1	3.71806	0.238684
GO:0005131	growth hormone receptor binding	1	3.71806	0.238684
GO:0005980	glycogen catabolic process	1	3.71806	0.238684
GO:0006081	cellular aldehyde metabolic process	1	3.71806	0.238684
GO:0006646	phosphatidylethanolamine biosynthetic process	1	3.71806	0.238684
GO:0008190	eukaryotic initiation factor 4E binding	1	3.71806	0.238684
GO:0008343	adult feeding behavior	1	3.71806	0.238684
GO:0008401	retinoic acid 4-hydroxylase activity	1	3.71806	0.238684
GO:0010038	response to metal ion	1	3.71806	0.238684
GO:0010459	negative regulation of heart rate	1	3.71806	0.238684
GO:0010591	regulation of lamellipodium assembly	1	3.71806	0.238684
GO:0030957	Tat protein binding	1	3.71806	0.238684
GO:0031731	CCR6 chemokine receptor binding	1	3.71806	0.238684
GO:0031996	thioesterase binding	1	3.71806	0.238684
GO:0032308	positive regulation of prostaglandin secretion	1	3.71806	0.238684
GO:0032836	glomerular basement membrane development	1	3.71806	0.238684
GO:0033151	V(D)J recombination	1	3.71806	0.238684
GO:0033598	mammary gland epithelial cell proliferation	1	3.71806	0.238684
GO:0035374	chondroitin sulfate binding	1	3.71806	0.238684
GO:0036312	phosphatidylinositol 3-kinase regulatory subunit binding	1	3.71806	0.238684
GO:0042058	regulation of epidermal growth factor receptor signaling pathway	1	3.71806	0.238684
GO:0042276	error-prone translesion synthesis	1	3.71806	0.238684
GO:0043031	negative regulation of macrophage activation	1	3.71806	0.238684
GO:0043422	protein kinase B binding	1	3.71806	0.238684
GO:0043653	mitochondrial fragmentation involved in apoptotic process	1	3.71806	0.238684
GO:0044346	fibroblast apoptotic process	1	3.71806	0.238684
GO:0044598	doxorubicin metabolic process	1	3.71806	0.238684
GO:0046415	urate metabolic process	1	3.71806	0.238684
GO:0046638	positive regulation of alpha-beta T cell differentiation	1	3.71806	0.238684
GO:0048023	positive regulation of melanin biosynthetic process	1	3.71806	0.238684
GO:0048699	generation of neurons	1	3.71806	0.238684
GO:0048703	embryonic viscerocranium morphogenesis	1	3.71806	0.238684
GO:0050786	RAGE receptor binding	1	3.71806	0.238684
GO:0050909	sensory perception of taste	1	3.71806	0.238684
GO:0051988	regulation of attachment of spindle microtubules to kinetochore	1	3.71806	0.238684
GO:0052740	1-acyl-2-lysophosphatidylserine acylhydrolase activity	1	3.71806	0.238684
GO:0060397	growth hormone receptor signaling pathway via JAK-STAT	1	3.71806	0.238684
GO:0060445	branching involved in salivary gland morphogenesis	1	3.71806	0.238684
GO:0060998	regulation of dendritic spine development	1	3.71806	0.238684
GO:0061072	iris morphogenesis	1	3.71806	0.238684
GO:0070314	G1 to G0 transition	1	3.71806	0.238684
GO:0071374	cellular response to parathyroid hormone stimulus	1	3.71806	0.238684
GO:0071394	cellular response to testosterone stimulus	1	3.71806	0.238684
GO:0071546	pi-body	1	3.71806	0.238684
GO:0072678	T cell migration	1	3.71806	0.238684
GO:0090331	negative regulation of platelet aggregation	1	3.71806	0.238684
GO:0098887	neurotransmitter receptor transport, endosome to postsynaptic membrane	1	3.71806	0.238684
GO:0120316	sperm flagellum assembly	1	3.71806	0.238684
GO:0150077	regulation of neuroinflammatory response	1	3.71806	0.238684
GO:1901653	cellular response to peptide	1	3.71806	0.238684
GO:1901838	positive regulation of transcription of nucleolar large rRNA by RNA polymerase I	1	3.71806	0.238684
GO:1902237	positive regulation of endoplasmic reticulum stress-induced intrinsic apoptotic signaling pathway	1	3.71806	0.238684
GO:1903715	regulation of aerobic respiration	1	3.71806	0.238684
GO:2000320	negative regulation of T-helper 17 cell differentiation	1	3.71806	0.238684
GO:0000307	cyclin-dependent protein kinase holoenzyme complex	2	2.1246	0.242329
GO:0030326	embryonic limb morphogenesis	2	2.1246	0.242329
GO:0031663	lipopolysaccharide-mediated signaling pathway	2	2.1246	0.242329
GO:0032435	negative regulation of proteasomal ubiquitin-dependent protein catabolic process	2	2.1246	0.242329
GO:0043330	response to exogenous dsRNA	2	2.1246	0.242329
GO:0045429	positive regulation of nitric oxide biosynthetic process	2	2.1246	0.242329
GO:0045765	regulation of angiogenesis	2	2.1246	0.242329
GO:0051591	response to cAMP	2	2.1246	0.242329
GO:0015629	actin cytoskeleton	9	1.32263	0.242671
GO:0002250	adaptive immune response	7	1.38438	0.243454
GO:0005506	iron ion binding	5	1.48722	0.246731
GO:0007189	adenylate cyclase-activating G protein-coupled receptor signaling pathway	5	1.48722	0.246731
GO:0042752	regulation of circadian rhythm	3	1.74284	0.247245
GO:0043410	positive regulation of MAPK cascade	6	1.42091	0.248239
GO:0042981	regulation of apoptotic process	7	1.36981	0.251562
GO:0000077	DNA damage checkpoint signaling	2	2.06559	0.252357
GO:0008528	G protein-coupled peptide receptor activity	2	2.06559	0.252357
GO:0010634	positive regulation of epithelial cell migration	2	2.06559	0.252357
GO:0016740	transferase activity	2	2.06559	0.252357
GO:0017046	peptide hormone binding	2	2.06559	0.252357
GO:0019838	growth factor binding	2	2.06559	0.252357
GO:0031234	extrinsic component of cytoplasmic side of plasma membrane	2	2.06559	0.252357
GO:0042542	response to hydrogen peroxide	2	2.06559	0.252357
GO:0045595	regulation of cell differentiation	2	2.06559	0.252357
GO:0048709	oligodendrocyte differentiation	2	2.06559	0.252357
GO:0060021	roof of mouth development	3	1.71603	0.254489
GO:0051726	regulation of cell cycle	8	1.32788	0.256718
GO:0030667	secretory granule membrane	4	1.54919	0.258575
GO:0001823	mesonephros development	1	3.38005	0.259172
GO:0002064	epithelial cell development	1	3.38005	0.259172
GO:0002116	semaphorin receptor complex	1	3.38005	0.259172
GO:0002903	negative regulation of B cell apoptotic process	1	3.38005	0.259172
GO:0003300	cardiac muscle hypertrophy	1	3.38005	0.259172
GO:0004143	ATP-dependent diacylglycerol kinase activity	1	3.38005	0.259172
GO:0005114	type II transforming growth factor beta receptor binding	1	3.38005	0.259172
GO:0005614	interstitial matrix	1	3.38005	0.259172
GO:0005979	regulation of glycogen biosynthetic process	1	3.38005	0.259172
GO:0006182	cGMP biosynthetic process	1	3.38005	0.259172
GO:0006349	regulation of gene expression by genomic imprinting	1	3.38005	0.259172
GO:0006353	DNA-templated transcription termination	1	3.38005	0.259172
GO:0006970	response to osmotic stress	1	3.38005	0.259172
GO:0006983	ER overload response	1	3.38005	0.259172
GO:0007168	receptor guanylyl cyclase signaling pathway	1	3.38005	0.259172
GO:0007178	transmembrane receptor protein serine/threonine kinase signaling pathway	1	3.38005	0.259172
GO:0007614	short-term memory	1	3.38005	0.259172
GO:0009435	NAD biosynthetic process	1	3.38005	0.259172
GO:0010248	establishment or maintenance of transmembrane electrochemical gradient	1	3.38005	0.259172
GO:0014033	neural crest cell differentiation	1	3.38005	0.259172
GO:0015269	calcium-activated potassium channel activity	1	3.38005	0.259172
GO:0016788	hydrolase activity, acting on ester bonds	1	3.38005	0.259172
GO:0017101	aminoacyl-tRNA synthetase multienzyme complex	1	3.38005	0.259172
GO:0018023	peptidyl-lysine trimethylation	1	3.38005	0.259172
GO:0019370	leukotriene biosynthetic process	1	3.38005	0.259172
GO:0019897	extrinsic component of plasma membrane	1	3.38005	0.259172
GO:0021904	dorsal/ventral neural tube patterning	1	3.38005	0.259172
GO:0021953	central nervous system neuron differentiation	1	3.38005	0.259172
GO:0022407	regulation of cell-cell adhesion	1	3.38005	0.259172
GO:0030877	beta-catenin destruction complex	1	3.38005	0.259172
GO:0031098	stress-activated protein kinase signaling cascade	1	3.38005	0.259172
GO:0032432	actin filament bundle	1	3.38005	0.259172
GO:0034056	estrogen response element binding	1	3.38005	0.259172
GO:0034058	endosomal vesicle fusion	1	3.38005	0.259172
GO:0035020	regulation of Rac protein signal transduction	1	3.38005	0.259172
GO:0035723	interleukin-15-mediated signaling pathway	1	3.38005	0.259172
GO:0036065	fucosylation	1	3.38005	0.259172
GO:0036157	outer dynein arm	1	3.38005	0.259172
GO:0042608	T cell receptor binding	1	3.38005	0.259172
GO:0042753	positive regulation of circadian rhythm	1	3.38005	0.259172
GO:0043951	negative regulation of cAMP-mediated signaling	1	3.38005	0.259172
GO:0045028	G protein-coupled purinergic nucleotide receptor activity	1	3.38005	0.259172
GO:0045654	positive regulation of megakaryocyte differentiation	1	3.38005	0.259172
GO:0046834	lipid phosphorylation	1	3.38005	0.259172
GO:0046974	histone H3K9 methyltransferase activity	1	3.38005	0.259172
GO:0048598	embryonic morphogenesis	1	3.38005	0.259172
GO:0048846	axon extension involved in axon guidance	1	3.38005	0.259172
GO:0048935	peripheral nervous system neuron development	1	3.38005	0.259172
GO:0051693	actin filament capping	1	3.38005	0.259172
GO:0052739	phosphatidylserine 1-acylhydrolase activity	1	3.38005	0.259172
GO:0060563	neuroepithelial cell differentiation	1	3.38005	0.259172
GO:0061052	negative regulation of cell growth involved in cardiac muscle cell development	1	3.38005	0.259172
GO:0061314	Notch signaling involved in heart development	1	3.38005	0.259172
GO:0070198	protein localization to chromosome, telomeric region	1	3.38005	0.259172
GO:0070700	BMP receptor binding	1	3.38005	0.259172
GO:0070989	oxidative demethylation	1	3.38005	0.259172
GO:0071313	cellular response to caffeine	1	3.38005	0.259172
GO:0071474	cellular hyperosmotic response	1	3.38005	0.259172
GO:0071492	cellular response to UV-A	1	3.38005	0.259172
GO:0071803	positive regulation of podosome assembly	1	3.38005	0.259172
GO:0071872	cellular response to epinephrine stimulus	1	3.38005	0.259172
GO:0072091	regulation of stem cell proliferation	1	3.38005	0.259172
GO:0072577	endothelial cell apoptotic process	1	3.38005	0.259172
GO:0072711	cellular response to hydroxyurea	1	3.38005	0.259172
GO:0090309	positive regulation of DNA methylation-dependent heterochromatin formation	1	3.38005	0.259172
GO:0097224	sperm connecting piece	1	3.38005	0.259172
GO:0097449	astrocyte projection	1	3.38005	0.259172
GO:0097677	STAT family protein binding	1	3.38005	0.259172
GO:0098696	regulation of neurotransmitter receptor localization to postsynaptic specialization membrane	1	3.38005	0.259172
GO:0098911	regulation of ventricular cardiac muscle cell action potential	1	3.38005	0.259172
GO:0140713	histone chaperone activity	1	3.38005	0.259172
GO:1900407	regulation of cellular response to oxidative stress	1	3.38005	0.259172
GO:1901385	regulation of voltage-gated calcium channel activity	1	3.38005	0.259172
GO:1901731	positive regulation of platelet aggregation	1	3.38005	0.259172
GO:1902036	regulation of hematopoietic stem cell differentiation	1	3.38005	0.259172
GO:1902533	positive regulation of intracellular signal transduction	1	3.38005	0.259172
GO:1903671	negative regulation of sprouting angiogenesis	1	3.38005	0.259172
GO:1904753	negative regulation of vascular associated smooth muscle cell migration	1	3.38005	0.259172
GO:1905665	positive regulation of calcium ion import across plasma membrane	1	3.38005	0.259172
GO:1990918	double-strand break repair involved in meiotic recombination	1	3.38005	0.259172
GO:2000273	positive regulation of signaling receptor activity	1	3.38005	0.259172
GO:0001750	photoreceptor outer segment	3	1.69003	0.261763
GO:0002039	p53 binding	3	1.69003	0.261763
GO:0006909	phagocytosis	3	1.69003	0.261763
GO:0071466	cellular response to xenobiotic stimulus	3	1.69003	0.261763
GO:0051897	positive regulation of phosphatidylinositol 3-kinase/protein kinase B signal transduction	6	1.39427	0.261765
GO:0001501	skeletal system development	5	1.45237	0.26195
GO:0002052	positive regulation of neuroblast proliferation	2	2.00976	0.262395
GO:0007095	mitotic G2 DNA damage checkpoint signaling	2	2.00976	0.262395
GO:0007281	germ cell development	2	2.00976	0.262395
GO:0030295	protein kinase activator activity	2	2.00976	0.262395
GO:0032870	cellular response to hormone stimulus	2	2.00976	0.262395
GO:0045505	dynein intermediate chain binding	2	2.00976	0.262395
GO:0046627	negative regulation of insulin receptor signaling pathway	2	2.00976	0.262395
GO:0048144	fibroblast proliferation	2	2.00976	0.262395
GO:0048536	spleen development	2	2.00976	0.262395
GO:0060173	limb development	2	2.00976	0.262395
GO:0016324	apical plasma membrane	13	1.22366	0.267346
GO:0000082	G1/S transition of mitotic cell cycle	3	1.6648	0.269063
GO:0016328	lateral plasma membrane	3	1.6648	0.269063
GO:0030669	clathrin-coated endocytic vesicle membrane	3	1.6648	0.269063
GO:0004867	serine-type endopeptidase inhibitor activity	4	1.51757	0.270469
GO:0033017	sarcoplasmic reticulum membrane	2	1.95687	0.272435
GO:0042056	chemoattractant activity	2	1.95687	0.272435
GO:0043531	ADP binding	2	1.95687	0.272435
GO:0043588	skin development	2	1.95687	0.272435
GO:0086091	regulation of heart rate by cardiac conduction	2	1.95687	0.272435
GO:0070098	chemokine-mediated signaling pathway	3	1.64032	0.276386
GO:0000164	protein phosphatase type 1 complex	1	3.09838	0.279108
GO:0001946	lymphangiogenesis	1	3.09838	0.279108
GO:0001967	suckling behavior	1	3.09838	0.279108
GO:0002087	regulation of respiratory gaseous exchange by nervous system process	1	3.09838	0.279108
GO:0002523	leukocyte migration involved in inflammatory response	1	3.09838	0.279108
GO:0003073	regulation of systemic arterial blood pressure	1	3.09838	0.279108
GO:0004032	alditol:NADP+ 1-oxidoreductase activity	1	3.09838	0.279108
GO:0004520	DNA endonuclease activity	1	3.09838	0.279108
GO:0004861	cyclin-dependent protein serine/threonine kinase inhibitor activity	1	3.09838	0.279108
GO:0005092	GDP-dissociation inhibitor activity	1	3.09838	0.279108
GO:0005095	GTPase inhibitor activity	1	3.09838	0.279108
GO:0005890	sodium:potassium-exchanging ATPase complex	1	3.09838	0.279108
GO:0006068	ethanol catabolic process	1	3.09838	0.279108
GO:0006978	DNA damage response, signal transduction by p53 class mediator resulting in transcription of p21 class mediator	1	3.09838	0.279108
GO:0008179	adenylate cyclase binding	1	3.09838	0.279108
GO:0008499	UDP-galactose:beta-N-acetylglucosamine beta-1,3-galactosyltransferase activity	1	3.09838	0.279108
GO:0008645	hexose transmembrane transport	1	3.09838	0.279108
GO:0010389	regulation of G2/M transition of mitotic cell cycle	1	3.09838	0.279108
GO:0010739	positive regulation of protein kinase A signaling	1	3.09838	0.279108
GO:0010936	negative regulation of macrophage cytokine production	1	3.09838	0.279108
GO:0010944	negative regulation of transcription by competitive promoter binding	1	3.09838	0.279108
GO:0016281	eukaryotic translation initiation factor 4F complex	1	3.09838	0.279108
GO:0017154	semaphorin receptor activity	1	3.09838	0.279108
GO:0021670	lateral ventricle development	1	3.09838	0.279108
GO:0021794	thalamus development	1	3.09838	0.279108
GO:0030518	intracellular steroid hormone receptor signaling pathway	1	3.09838	0.279108
GO:0030850	prostate gland development	1	3.09838	0.279108
GO:0031045	dense core granule	1	3.09838	0.279108
GO:0031115	negative regulation of microtubule polymerization	1	3.09838	0.279108
GO:0032794	GTPase activating protein binding	1	3.09838	0.279108
GO:0032926	negative regulation of activin receptor signaling pathway	1	3.09838	0.279108
GO:0033130	acetylcholine receptor binding	1	3.09838	0.279108
GO:0033270	paranode region of axon	1	3.09838	0.279108
GO:0034333	adherens junction assembly	1	3.09838	0.279108
GO:0034453	microtubule anchoring	1	3.09838	0.279108
GO:0034638	phosphatidylcholine catabolic process	1	3.09838	0.279108
GO:0035497	cAMP response element binding	1	3.09838	0.279108
GO:0035773	insulin secretion involved in cellular response to glucose stimulus	1	3.09838	0.279108
GO:0036477	somatodendritic compartment	1	3.09838	0.279108
GO:0040015	negative regulation of multicellular organism growth	1	3.09838	0.279108
GO:0042405	nuclear inclusion body	1	3.09838	0.279108
GO:0042982	amyloid precursor protein metabolic process	1	3.09838	0.279108
GO:0043117	positive regulation of vascular permeability	1	3.09838	0.279108
GO:0043931	ossification involved in bone maturation	1	3.09838	0.279108
GO:0044224	juxtaparanode region of axon	1	3.09838	0.279108
GO:0044615	nuclear pore nuclear basket	1	3.09838	0.279108
GO:0045019	negative regulation of nitric oxide biosynthetic process	1	3.09838	0.279108
GO:0045295	gamma-catenin binding	1	3.09838	0.279108
GO:0045475	locomotor rhythm	1	3.09838	0.279108
GO:0046975	histone H3K36 methyltransferase activity	1	3.09838	0.279108
GO:0048019	receptor antagonist activity	1	3.09838	0.279108
GO:0050732	negative regulation of peptidyl-tyrosine phosphorylation	1	3.09838	0.279108
GO:0050927	positive regulation of positive chemotaxis	1	3.09838	0.279108
GO:0051926	negative regulation of calcium ion transport	1	3.09838	0.279108
GO:0055008	cardiac muscle tissue morphogenesis	1	3.09838	0.279108
GO:0055056	D-glucose transmembrane transporter activity	1	3.09838	0.279108
GO:0060285	cilium-dependent cell motility	1	3.09838	0.279108
GO:0060413	atrial septum morphogenesis	1	3.09838	0.279108
GO:0061459	L-arginine transmembrane transporter activity	1	3.09838	0.279108
GO:0070410	co-SMAD binding	1	3.09838	0.279108
GO:0071233	cellular response to leucine	1	3.09838	0.279108
GO:0071493	cellular response to UV-B	1	3.09838	0.279108
GO:0097504	Gemini of coiled bodies	1	3.09838	0.279108
GO:0140268	endoplasmic reticulum-plasma membrane contact site	1	3.09838	0.279108
GO:1900747	negative regulation of vascular endothelial growth factor signaling pathway	1	3.09838	0.279108
GO:1903428	positive regulation of reactive oxygen species biosynthetic process	1	3.09838	0.279108
GO:1990535	neuron projection maintenance	1	3.09838	0.279108
GO:2000310	regulation of NMDA receptor activity	1	3.09838	0.279108
GO:2000562	negative regulation of CD4-positive, alpha-beta T cell proliferation	1	3.09838	0.279108
GO:0006355	regulation of DNA-templated transcription	17	1.17704	0.279457
GO:0033077	T cell differentiation in thymus	2	1.9067	0.28247
GO:0097060	synaptic membrane	2	1.9067	0.28247
GO:0120162	positive regulation of cold-induced thermogenesis	4	1.4725	0.28848
GO:0007156	homophilic cell adhesion via plasma membrane adhesion molecules	6	1.34388	0.289357
GO:0001530	lipopolysaccharide binding	2	1.85903	0.292492
GO:0019233	sensory perception of pain	2	1.85903	0.292492
GO:0031492	nucleosomal DNA binding	2	1.85903	0.292492
GO:0032728	positive regulation of interferon-beta production	2	1.85903	0.292492
GO:0035094	response to nicotine	2	1.85903	0.292492
GO:0043409	negative regulation of MAPK cascade	2	1.85903	0.292492
GO:0048487	beta-tubulin binding	2	1.85903	0.292492
GO:0071949	FAD binding	2	1.85903	0.292492
GO:0005819	spindle	5	1.38733	0.292985
GO:0012505	endomembrane system	5	1.38733	0.292985
GO:0000340	RNA 7-methylguanosine cap binding	1	2.86004	0.29851
GO:0001217	DNA-binding transcription repressor activity	1	2.86004	0.29851
GO:0001706	endoderm formation	1	2.86004	0.29851
GO:0003181	atrioventricular valve morphogenesis	1	2.86004	0.29851
GO:0003215	cardiac right ventricle morphogenesis	1	2.86004	0.29851
GO:0005513	detection of calcium ion	1	2.86004	0.29851
GO:0005845	mRNA cap binding complex	1	2.86004	0.29851
GO:0005858	axonemal dynein complex	1	2.86004	0.29851
GO:0006110	regulation of glycolytic process	1	2.86004	0.29851
GO:0006750	glutathione biosynthetic process	1	2.86004	0.29851
GO:0006825	copper ion transport	1	2.86004	0.29851
GO:0006940	regulation of smooth muscle contraction	1	2.86004	0.29851
GO:0007096	regulation of exit from mitosis	1	2.86004	0.29851
GO:0007398	ectoderm development	1	2.86004	0.29851
GO:0008253	5'-nucleotidase activity	1	2.86004	0.29851
GO:0009303	rRNA transcription	1	2.86004	0.29851
GO:0010463	mesenchymal cell proliferation	1	2.86004	0.29851
GO:0010614	negative regulation of cardiac muscle hypertrophy	1	2.86004	0.29851
GO:0010631	epithelial cell migration	1	2.86004	0.29851
GO:0010762	regulation of fibroblast migration	1	2.86004	0.29851
GO:0010818	T cell chemotaxis	1	2.86004	0.29851
GO:0015693	magnesium ion transport	1	2.86004	0.29851
GO:0016573	histone acetylation	1	2.86004	0.29851
GO:0019430	removal of superoxide radicals	1	2.86004	0.29851
GO:0030247	polysaccharide binding	1	2.86004	0.29851
GO:0030595	leukocyte chemotaxis	1	2.86004	0.29851
GO:0031432	titin binding	1	2.86004	0.29851
GO:0032367	intracellular cholesterol transport	1	2.86004	0.29851
GO:0032454	histone H3K9 demethylase activity	1	2.86004	0.29851
GO:0032495	response to muramyl dipeptide	1	2.86004	0.29851
GO:0032963	collagen metabolic process	1	2.86004	0.29851
GO:0033391	chromatoid body	1	2.86004	0.29851
GO:0033554	cellular response to stress	1	2.86004	0.29851
GO:0033628	regulation of cell adhesion mediated by integrin	1	2.86004	0.29851
GO:0033700	phospholipid efflux	1	2.86004	0.29851
GO:0034236	protein kinase A catalytic subunit binding	1	2.86004	0.29851
GO:0034362	low-density lipoprotein particle	1	2.86004	0.29851
GO:0034498	early endosome to Golgi transport	1	2.86004	0.29851
GO:0035589	G protein-coupled purinergic nucleotide receptor signaling pathway	1	2.86004	0.29851
GO:0035845	photoreceptor cell outer segment organization	1	2.86004	0.29851
GO:0036038	MKS complex	1	2.86004	0.29851
GO:0038180	nerve growth factor signaling pathway	1	2.86004	0.29851
GO:0039706	co-receptor binding	1	2.86004	0.29851
GO:0042581	specific granule	1	2.86004	0.29851
GO:0042633	hair cycle	1	2.86004	0.29851
GO:0042659	regulation of cell fate specification	1	2.86004	0.29851
GO:0043403	skeletal muscle tissue regeneration	1	2.86004	0.29851
GO:0043534	blood vessel endothelial cell migration	1	2.86004	0.29851
GO:0043560	insulin receptor substrate binding	1	2.86004	0.29851
GO:0043589	skin morphogenesis	1	2.86004	0.29851
GO:0044255	cellular lipid metabolic process	1	2.86004	0.29851
GO:0045667	regulation of osteoblast differentiation	1	2.86004	0.29851
GO:0046425	regulation of receptor signaling pathway via JAK-STAT	1	2.86004	0.29851
GO:0048791	calcium ion-regulated exocytosis of neurotransmitter	1	2.86004	0.29851
GO:0051014	actin filament severing	1	2.86004	0.29851
GO:0051168	nuclear export	1	2.86004	0.29851
GO:0051412	response to corticosterone	1	2.86004	0.29851
GO:0051764	actin crosslink formation	1	2.86004	0.29851
GO:0052650	NADP-retinol dehydrogenase activity	1	2.86004	0.29851
GO:0060402	calcium ion transport into cytosol	1	2.86004	0.29851
GO:0060644	mammary gland epithelial cell differentiation	1	2.86004	0.29851
GO:0061665	SUMO ligase activity	1	2.86004	0.29851
GO:0071285	cellular response to lithium ion	1	2.86004	0.29851
GO:0071901	negative regulation of protein serine/threonine kinase activity	1	2.86004	0.29851
GO:0086064	cell communication by electrical coupling involved in cardiac conduction	1	2.86004	0.29851
GO:0089718	amino acid import across plasma membrane	1	2.86004	0.29851
GO:0097242	amyloid-beta clearance	1	2.86004	0.29851
GO:1902902	negative regulation of autophagosome assembly	1	2.86004	0.29851
GO:1903238	positive regulation of leukocyte tethering or rolling	1	2.86004	0.29851
GO:1904645	response to amyloid-beta	1	2.86004	0.29851
GO:1990391	DNA repair complex	1	2.86004	0.29851
GO:0000781	chromosome, telomeric region	6	1.32788	0.29869
GO:0090263	positive regulation of canonical Wnt signaling pathway	4	1.44391	0.30058
GO:0000978	RNA polymerase II cis-regulatory region sequence-specific DNA binding	34	1.10213	0.301969
GO:0007405	neuroblast proliferation	2	1.81369	0.302495
GO:0019955	cytokine binding	2	1.81369	0.302495
GO:0032733	positive regulation of interleukin-10 production	2	1.81369	0.302495
GO:0043014	alpha-tubulin binding	2	1.81369	0.302495
GO:0043198	dendritic shaft	2	1.81369	0.302495
GO:0045454	cell redox homeostasis	2	1.81369	0.302495
GO:0030666	endocytic vesicle membrane	3	1.54919	0.30584
GO:0032868	response to insulin	3	1.54919	0.30584
GO:0060326	cell chemotaxis	3	1.54919	0.30584
GO:0042383	sarcolemma	4	1.43002	0.306652
GO:0005741	mitochondrial outer membrane	7	1.2758	0.310293
GO:0004497	monooxygenase activity	2	1.7705	0.312473
GO:0006633	fatty acid biosynthetic process	2	1.7705	0.312473
GO:0035249	synaptic transmission, glutamatergic	2	1.7705	0.312473
GO:0043280	positive regulation of cysteine-type endopeptidase activity involved in apoptotic process	2	1.7705	0.312473
GO:0060395	SMAD protein signal transduction	2	1.7705	0.312473
GO:0098869	cellular oxidant detoxification	3	1.52797	0.313229
GO:0000302	response to reactive oxygen species	1	2.65575	0.31739
GO:0000800	lateral element	1	2.65575	0.31739
GO:0001964	startle response	1	2.65575	0.31739
GO:0005149	interleukin-1 receptor binding	1	2.65575	0.31739
GO:0006473	protein acetylation	1	2.65575	0.31739
GO:0006790	sulfur compound metabolic process	1	2.65575	0.31739
GO:0007194	negative regulation of adenylate cyclase activity	1	2.65575	0.31739
GO:0008195	phosphatidate phosphatase activity	1	2.65575	0.31739
GO:0010469	regulation of signaling receptor activity	1	2.65575	0.31739
GO:0010633	negative regulation of epithelial cell migration	1	2.65575	0.31739
GO:0010717	regulation of epithelial to mesenchymal transition	1	2.65575	0.31739
GO:0010954	positive regulation of protein processing	1	2.65575	0.31739
GO:0015267	channel activity	1	2.65575	0.31739
GO:0015276	ligand-gated monoatomic ion channel activity	1	2.65575	0.31739
GO:0016242	negative regulation of macroautophagy	1	2.65575	0.31739
GO:0019079	viral genome replication	1	2.65575	0.31739
GO:0030048	actin filament-based movement	1	2.65575	0.31739
GO:0030296	protein tyrosine kinase activator activity	1	2.65575	0.31739
GO:0030857	negative regulation of epithelial cell differentiation	1	2.65575	0.31739
GO:0031089	platelet dense granule lumen	1	2.65575	0.31739
GO:0031103	axon regeneration	1	2.65575	0.31739
GO:0032591	dendritic spine membrane	1	2.65575	0.31739
GO:0032688	negative regulation of interferon-beta production	1	2.65575	0.31739
GO:0032700	negative regulation of interleukin-17 production	1	2.65575	0.31739
GO:0033120	positive regulation of RNA splicing	1	2.65575	0.31739
GO:0033962	P-body assembly	1	2.65575	0.31739
GO:0034116	positive regulation of heterotypic cell-cell adhesion	1	2.65575	0.31739
GO:0034399	nuclear periphery	1	2.65575	0.31739
GO:0036376	sodium ion export across plasma membrane	1	2.65575	0.31739
GO:0042491	inner ear auditory receptor cell differentiation	1	2.65575	0.31739
GO:0042800	histone H3K4 methyltransferase activity	1	2.65575	0.31739
GO:0043394	proteoglycan binding	1	2.65575	0.31739
GO:0044548	S100 protein binding	1	2.65575	0.31739
GO:0045651	positive regulation of macrophage differentiation	1	2.65575	0.31739
GO:0045730	respiratory burst	1	2.65575	0.31739
GO:0045744	negative regulation of G protein-coupled receptor signaling pathway	1	2.65575	0.31739
GO:0045777	positive regulation of blood pressure	1	2.65575	0.31739
GO:0045820	negative regulation of glycolytic process	1	2.65575	0.31739
GO:0046323	glucose import	1	2.65575	0.31739
GO:0046339	diacylglycerol metabolic process	1	2.65575	0.31739
GO:0046839	phospholipid dephosphorylation	1	2.65575	0.31739
GO:0048546	digestive tract morphogenesis	1	2.65575	0.31739
GO:0048596	embryonic camera-type eye morphogenesis	1	2.65575	0.31739
GO:0050930	induction of positive chemotaxis	1	2.65575	0.31739
GO:0051279	regulation of release of sequestered calcium ion into cytosol	1	2.65575	0.31739
GO:0060317	cardiac epithelial to mesenchymal transition	1	2.65575	0.31739
GO:0060411	cardiac septum morphogenesis	1	2.65575	0.31739
GO:0061575	cyclin-dependent protein serine/threonine kinase activator activity	1	2.65575	0.31739
GO:0062009	secondary palate development	1	2.65575	0.31739
GO:0070166	enamel mineralization	1	2.65575	0.31739
GO:0070365	hepatocyte differentiation	1	2.65575	0.31739
GO:0070593	dendrite self-avoidance	1	2.65575	0.31739
GO:0070986	left/right axis specification	1	2.65575	0.31739
GO:0071044	histone mRNA catabolic process	1	2.65575	0.31739
GO:0071639	positive regulation of monocyte chemotactic protein-1 production	1	2.65575	0.31739
GO:1902287	semaphorin-plexin signaling pathway involved in axon guidance	1	2.65575	0.31739
GO:0006915	apoptotic process	17	1.14505	0.317988
GO:0003674	molecular_function	20	1.13011	0.318826
GO:0009887	animal organ morphogenesis	4	1.40304	0.318833
GO:0042995	cell projection	5	1.33743	0.319308
GO:0003725	double-stranded RNA binding	3	1.50732	0.320622
GO:0005901	caveola	3	1.50732	0.320622
GO:0006351	DNA-templated transcription	3	1.50732	0.320622
GO:0032735	positive regulation of interleukin-12 production	2	1.72933	0.32242
GO:0050796	regulation of insulin secretion	2	1.72933	0.32242
GO:0043231	intracellular membrane-bounded organelle	26	1.10479	0.327856
GO:0006936	muscle contraction	3	1.48722	0.328016
GO:0021987	cerebral cortex development	3	1.48722	0.328016
GO:0030509	BMP signaling pathway	3	1.48722	0.328016
GO:0032088	negative regulation of NF-kappaB transcription factor activity	3	1.48722	0.328016
GO:0002020	protease binding	4	1.37706	0.33105
GO:0002548	monocyte chemotaxis	2	1.69003	0.33233
GO:0042177	negative regulation of protein catabolic process	2	1.69003	0.33233
GO:0048839	inner ear development	2	1.69003	0.33233
GO:0050673	epithelial cell proliferation	2	1.69003	0.33233
GO:1990573	potassium ion import across plasma membrane	2	1.69003	0.33233
GO:0000062	fatty-acyl-CoA binding	1	2.4787	0.335763
GO:0001655	urogenital system development	1	2.4787	0.335763
GO:0001702	gastrulation with mouth forming second	1	2.4787	0.335763
GO:0002720	positive regulation of cytokine production involved in immune response	1	2.4787	0.335763
GO:0004089	carbonate dehydratase activity	1	2.4787	0.335763
GO:0005005	transmembrane-ephrin receptor activity	1	2.4787	0.335763
GO:0008527	taste receptor activity	1	2.4787	0.335763
GO:0010039	response to iron ion	1	2.4787	0.335763
GO:0010181	FMN binding	1	2.4787	0.335763
GO:0010812	negative regulation of cell-substrate adhesion	1	2.4787	0.335763
GO:0010820	positive regulation of T cell chemotaxis	1	2.4787	0.335763
GO:0015464	acetylcholine receptor activity	1	2.4787	0.335763
GO:0016407	acetyltransferase activity	1	2.4787	0.335763
GO:0021522	spinal cord motor neuron differentiation	1	2.4787	0.335763
GO:0021537	telencephalon development	1	2.4787	0.335763
GO:0030031	cell projection assembly	1	2.4787	0.335763
GO:0030673	axolemma	1	2.4787	0.335763
GO:0030695	GTPase regulator activity	1	2.4787	0.335763
GO:0031011	Ino80 complex	1	2.4787	0.335763
GO:0032434	regulation of proteasomal ubiquitin-dependent protein catabolic process	1	2.4787	0.335763
GO:0033173	calcineurin-NFAT signaling cascade	1	2.4787	0.335763
GO:0034122	negative regulation of toll-like receptor signaling pathway	1	2.4787	0.335763
GO:0040008	regulation of growth	1	2.4787	0.335763
GO:0043548	phosphatidylinositol 3-kinase binding	1	2.4787	0.335763
GO:0045236	CXCR chemokine receptor binding	1	2.4787	0.335763
GO:0045737	positive regulation of cyclin-dependent protein serine/threonine kinase activity	1	2.4787	0.335763
GO:0045806	negative regulation of endocytosis	1	2.4787	0.335763
GO:0048599	oocyte development	1	2.4787	0.335763
GO:0048745	smooth muscle tissue development	1	2.4787	0.335763
GO:0050773	regulation of dendrite development	1	2.4787	0.335763
GO:0055093	response to hyperoxia	1	2.4787	0.335763
GO:0060347	heart trabecula formation	1	2.4787	0.335763
GO:0061045	negative regulation of wound healing	1	2.4787	0.335763
GO:0090280	positive regulation of calcium ion import	1	2.4787	0.335763
GO:0090557	establishment of endothelial intestinal barrier	1	2.4787	0.335763
GO:0099509	regulation of presynaptic cytosolic calcium ion concentration	1	2.4787	0.335763
GO:0099645	neurotransmitter receptor localization to postsynaptic specialization membrane	1	2.4787	0.335763
GO:1900034	regulation of cellular response to heat	1	2.4787	0.335763
GO:1902166	negative regulation of intrinsic apoptotic signaling pathway in response to DNA damage by p53 class mediator	1	2.4787	0.335763
GO:1903826	L-arginine transmembrane transport	1	2.4787	0.335763
GO:1903830	magnesium ion transmembrane transport	1	2.4787	0.335763
GO:1904507	positive regulation of telomere maintenance in response to DNA damage	1	2.4787	0.335763
GO:2000434	regulation of protein neddylation	1	2.4787	0.335763
GO:2001256	regulation of store-operated calcium entry	1	2.4787	0.335763
GO:0016310	phosphorylation	9	1.19937	0.337077
GO:0000792	heterochromatin	2	1.65247	0.342199
GO:0005249	voltage-gated potassium channel activity	2	1.65247	0.342199
GO:0005871	kinesin complex	2	1.65247	0.342199
GO:0006635	fatty acid beta-oxidation	2	1.65247	0.342199
GO:0007098	centrosome cycle	2	1.65247	0.342199
GO:0008202	steroid metabolic process	2	1.65247	0.342199
GO:0043539	protein serine/threonine kinase activator activity	2	1.65247	0.342199
GO:0050766	positive regulation of phagocytosis	2	1.65247	0.342199
GO:0032729	positive regulation of type II interferon production	3	1.44859	0.342798
GO:0004222	metalloendopeptidase activity	4	1.35202	0.343291
GO:0006979	response to oxidative stress	4	1.33984	0.349417
GO:0050728	negative regulation of inflammatory response	4	1.33984	0.349417
GO:0036464	cytoplasmic ribonucleoprotein granule	3	1.43002	0.350181
GO:0050804	modulation of chemical synaptic transmission	3	1.43002	0.350181
GO:0005737	cytoplasm	138	1.03113	0.351474
GO:0007162	negative regulation of cell adhesion	2	1.61655	0.352021
GO:0007188	adenylate cyclase-modulating G protein-coupled receptor signaling pathway	2	1.61655	0.352021
GO:0042100	B cell proliferation	2	1.61655	0.352021
GO:0072089	stem cell proliferation	2	1.61655	0.352021
GO:1904262	negative regulation of TORC1 signaling	2	1.61655	0.352021
GO:0000779	condensed chromosome, centromeric region	1	2.32378	0.353643
GO:0001829	trophectodermal cell differentiation	1	2.32378	0.353643
GO:0002755	MyD88-dependent toll-like receptor signaling pathway	1	2.32378	0.353643
GO:0003094	glomerular filtration	1	2.32378	0.353643
GO:0003161	cardiac conduction system development	1	2.32378	0.353643
GO:0004016	adenylate cyclase activity	1	2.32378	0.353643
GO:0004115	3',5'-cyclic-AMP phosphodiesterase activity	1	2.32378	0.353643
GO:0005159	insulin-like growth factor receptor binding	1	2.32378	0.353643
GO:0005355	glucose transmembrane transporter activity	1	2.32378	0.353643
GO:0005892	acetylcholine-gated channel complex	1	2.32378	0.353643
GO:0006103	2-oxoglutarate metabolic process	1	2.32378	0.353643
GO:0006665	sphingolipid metabolic process	1	2.32378	0.353643
GO:0006855	xenobiotic transmembrane transport	1	2.32378	0.353643
GO:0007250	activation of NF-kappaB-inducing kinase activity	1	2.32378	0.353643
GO:0008033	tRNA processing	1	2.32378	0.353643
GO:0015095	magnesium ion transmembrane transporter activity	1	2.32378	0.353643
GO:0015909	long-chain fatty acid transport	1	2.32378	0.353643
GO:0016581	NuRD complex	1	2.32378	0.353643
[truncated: 964 more rows]
