# Supplementary material for: Peptide-based Self-adaptive Implant Coating Sequentially Regulates Bone Regeneration to Enhance Interfacial Osseointegration
Source: Research Square preprint supplement (doi:10.21203/rs.3.rs-5132912/v1), 2024-10-01
Supplement: Supplementary file 605 [file 0-KEGG-Top20 all.xlsx]

## Sheet: demo_bubble_data
Term_ID	Term_description	ListHit	FoldEnrichment	p-value
hsa00010	Glycolysis / Gluconeogenesis	2	0.90899	0.651501
hsa00020	Citrate cycle (TCA cycle)	2	1.99391	0.265328
hsa00040	Pentose and glucuronate interconversions	1	0.858491	0.694766
hsa00051	Fructose and mannose metabolism	1	0.90899	0.673919
hsa00052	Galactose metabolism	1	0.965802	0.651655
hsa00140	Steroid hormone biosynthesis	3	1.49544	0.32495
hsa00190	Oxidative phosphorylation	1	0.230639	0.988254
hsa00220	Arginine biosynthesis	2	2.80961	0.158066
hsa00230	Purine metabolism	4	0.965802	0.598911
hsa00240	Pyrimidine metabolism	2	1.06571	0.564608
hsa00250	Alanine, aspartate and glutamate metabolism	2	1.67058	0.337649
hsa00260	Glycine, serine and threonine metabolism	3	2.31792	0.138438
hsa00270	Cysteine and methionine metabolism	3	1.78302	0.236463
hsa00310	Lysine degradation	1	0.490566	0.875093
hsa00330	Arginine and proline metabolism	3	1.85434	0.21925
hsa00340	Histidine metabolism	1	1.4048	0.515462
hsa00350	Tyrosine metabolism	1	0.858491	0.694766
hsa00360	Phenylalanine metabolism	1	1.9316	0.409482
hsa00410	beta-Alanine metabolism	1	0.996957	0.639961
hsa00450	Selenocompound metabolism	1	1.81798	0.428627
hsa00470	D-Amino acid metabolism	1	5.15094	0.179147
hsa00480	Glutathione metabolism	1	0.561921	0.837183
hsa00500	Starch and sucrose metabolism	2	1.76604	0.313695
hsa00512	Mucin type O-glycan biosynthesis	1	0.858491	0.694766
hsa00520	Amino sugar and nucleotide sugar metabolism	1	0.630728	0.801409
hsa00561	Glycerolipid metabolism	4	1.99391	0.140273
hsa00562	Inositol phosphate metabolism	3	1.2701	0.42229
hsa00563	Glycosylphosphatidylinositol (GPI)-anchor biosynthesis	1	1.18868	0.575359
hsa00564	Glycerophospholipid metabolism	6	1.87307	0.10113
hsa00565	Ether lipid metabolism	2	1.23623	0.484654
hsa00590	Arachidonic acid metabolism	3	1.51995	0.316014
hsa00591	Linoleic acid metabolism	1	1.03019	0.627876
hsa00592	alpha-Linolenic acid metabolism	1	1.18868	0.575359
hsa00600	Sphingolipid metabolism	1	0.572327	0.831701
hsa00601	Glycosphingolipid biosynthesis - lacto and neolacto series	2	2.20755	0.229019
hsa00603	Glycosphingolipid biosynthesis - globo and isoglobo series	1	1.9316	0.409482
hsa00620	Pyruvate metabolism	1	0.643868	0.794728
hsa00670	One carbon pool by folate	3	4.63585	0.0254076
hsa00750	Vitamin B6 metabolism	1	5.15094	0.179147
hsa00760	Nicotinate and nicotinamide metabolism	2	1.67058	0.337649
hsa00785	Lipoic acid metabolism	1	1.62661	0.465081
hsa00790	Folate biosynthesis	1	1.14465	0.589142
hsa00830	Retinol metabolism	3	1.36349	0.37841
hsa00860	Porphyrin metabolism	1	0.718736	0.757811
hsa00910	Nitrogen metabolism	1	1.81798	0.428627
hsa00970	Aminoacyl-tRNA biosynthesis	3	2.1072	0.16949
hsa00980	Metabolism of xenobiotics by cytochrome P450	2	0.858491	0.682197
hsa00982	Drug metabolism - cytochrome P450	2	0.922557	0.643469
hsa00983	Drug metabolism - other enzymes	1	0.396226	0.924065
hsa01521	EGFR tyrosine kinase inhibitor resistance	3	1.17363	0.473483
hsa01522	Endocrine resistance	4	1.30129	0.369621
hsa01523	Antifolate resistance	1	1.03019	0.627876
hsa01524	Platinum drug resistance	4	1.74116	0.197061
hsa02010	ABC transporters	1	0.686792	0.773311
hsa03013	Nucleocytoplasmic transport	1	0.286164	0.972015
hsa03015	mRNA surveillance pathway	1	0.318615	0.959629
hsa03040	Spliceosome	1	0.235921	0.987015
hsa03082	ATP-dependent chromatin remodeling	9	2.37736	0.0133774
hsa03250	Viral life cycle - HIV-1	2	0.996957	0.601124
hsa03320	PPAR signaling pathway	2	0.824151	0.703746
hsa03440	Homologous recombination	1	0.753797	0.741255
hsa03460	Fanconi anemia pathway	1	0.572327	0.831701
hsa04010	MAPK signaling pathway	20	2.05353	0.00176002
hsa04012	ErbB signaling pathway	6	2.18158	0.0567927
hsa04014	Ras signaling pathway	16	2.0953	0.00409225
hsa04015	Rap1 signaling pathway	10	1.4717	0.143072
hsa04020	Calcium signaling pathway	8	0.981132	0.573343
hsa04022	cGMP-PKG signaling pathway	10	1.85064	0.044319
hsa04024	cAMP signaling pathway	7	0.961509	0.596682
hsa04060	Cytokine-cytokine receptor interaction	18	1.88577	0.00716556
hsa04061	Viral protein interaction with cytokine and cytokine receptor	7	2.20755	0.0391608
hsa04062	Chemokine signaling pathway	11	1.78928	0.0441829
hsa04064	NF-kappa B signaling pathway	8	2.42397	0.0172554
hsa04066	HIF-1 signaling pathway	5	1.41769	0.277475
hsa04068	FoxO signaling pathway	8	1.88737	0.061899
hsa04070	Phosphatidylinositol signaling system	4	1.27446	0.38442
hsa04071	Sphingolipid signaling pathway	6	1.53251	0.197703
hsa04072	Phospholipase D signaling pathway	8	1.68194	0.103794
hsa04080	Neuroactive ligand-receptor interaction	11	0.926328	0.647425
hsa04110	Cell cycle	8	1.57481	0.136392
hsa04115	p53 signaling pathway	7	2.92351	0.0097315
hsa04120	Ubiquitin mediated proteolysis	3	0.657567	0.840238
hsa04137	Mitophagy - animal	2	0.858491	0.682197
hsa04140	Autophagy - animal	2	0.374614	0.972427
hsa04141	Protein processing in endoplasmic reticulum	2	0.365747	0.975386
hsa04142	Lysosome	2	0.468268	0.931079
hsa04144	Endocytosis	4	0.494491	0.964348
hsa04145	Phagosome	3	0.626466	0.863122
hsa04146	Peroxisome	1	0.372357	0.935687
hsa04150	mTOR signaling pathway	7	1.38679	0.241045
hsa04151	PI3K-Akt signaling pathway	22	1.89923	0.00281667
hsa04152	AMPK signaling pathway	4	1.02167	0.554116
hsa04210	Apoptosis	10	2.28931	0.0120261
hsa04211	Longevity regulating pathway	4	1.38902	0.325186
hsa04213	Longevity regulating pathway - multiple species	1	0.50665	0.866532
hsa04215	Apoptosis - multiple species	2	1.9316	0.27745
hsa04216	Ferroptosis	4	3.01519	0.0425279
hsa04217	Necroptosis	11	2.13813	0.0139783
hsa04218	Cellular senescence	8	1.58491	0.132919
hsa04260	Cardiac muscle contraction	3	1.06571	0.538312
hsa04261	Adrenergic signaling in cardiomyocytes	8	1.60549	0.126114
hsa04270	Vascular smooth muscle contraction	6	1.38384	0.266463
hsa04310	Wnt signaling pathway	10	1.77619	0.0557117
hsa04330	Notch signaling pathway	4	1.99391	0.140273
hsa04340	Hedgehog signaling pathway	2	1.10377	0.545473
hsa04350	TGF-beta signaling pathway	6	1.71698	0.137018
hsa04360	Axon guidance	13	2.20755	0.0060671
hsa04370	VEGF signaling pathway	5	2.61912	0.0414013
hsa04371	Apelin signaling pathway	8	1.77874	0.0812394
hsa04380	Osteoclast differentiation	4	0.936535	0.623271
hsa04390	Hippo signaling pathway	11	2.16536	0.0128058
hsa04510	Focal adhesion	11	1.67469	0.0650173
hsa04512	ECM-receptor interaction	5	1.73627	0.160928
hsa04514	Cell adhesion molecules	13	2.57547	0.00159541
hsa04520	Adherens junction	5	1.66159	0.182499
hsa04530	Tight junction	9	1.63618	0.0999602
hsa04540	Gap junction	1	0.351201	0.945535
hsa04550	Signaling pathways regulating pluripotency of stem cells	10	2.16123	0.0174431
hsa04610	Complement and coagulation cascades	6	2.15621	0.0594773
hsa04611	Platelet activation	8	1.99391	0.0475922
hsa04612	Antigen processing and presentation	1	0.441509	0.90097
hsa04613	Neutrophil extracellular trap formation	20	3.25323	3.03962e-06
hsa04620	Toll-like receptor signaling pathway	2	0.605993	0.847742
hsa04621	NOD-like receptor signaling pathway	8	1.33646	0.250093
hsa04622	RIG-I-like receptor signaling pathway	1	0.435291	0.904201
hsa04623	Cytosolic DNA-sensing pathway	2	0.835288	0.696701
hsa04625	C-type lectin receptor signaling pathway	3	0.891509	0.659559
hsa04630	JAK-STAT signaling pathway	8	1.48943	0.169642
hsa04640	Hematopoietic cell lineage	5	1.60967	0.199341
hsa04650	Natural killer cell mediated cytotoxicity	3	0.735849	0.779998
hsa04657	IL-17 signaling pathway	6	1.9727	0.0836377
hsa04658	Th1 and Th2 cell differentiation	4	1.37358	0.33258
hsa04659	Th17 cell differentiation	4	1.16625	0.450251
hsa04660	T cell receptor signaling pathway	3	0.766256	0.756157
hsa04662	B cell receptor signaling pathway	3	1.14465	0.490093
hsa04664	Fc epsilon RI signaling pathway	4	1.84511	0.170974
hsa04666	Fc gamma R-mediated phagocytosis	5	1.60967	0.199341
hsa04668	TNF signaling pathway	9	2.43992	0.0114098
hsa04670	Leukocyte transendothelial migration	9	2.4187	0.0120398
hsa04672	Intestinal immune network for IgA production	1	0.671862	0.780687
hsa04710	Circadian rhythm	1	0.90899	0.673919
hsa04713	Circadian entrainment	3	0.955845	0.612561
hsa04714	Thermogenesis	2	0.266428	0.996098
hsa04720	Long-term potentiation	2	0.922557	0.643469
hsa04722	Neurotrophin signaling pathway	7	1.81798	0.0907437
hsa04723	Retrograde endocannabinoid signaling	3	0.626466	0.863122
hsa04724	Glutamatergic synapse	4	1.07498	0.513718
hsa04725	Cholinergic synapse	7	1.91451	0.0733158
hsa04726	Serotonergic synapse	5	1.37972	0.296377
hsa04727	GABAergic synapse	2	0.694509	0.788769
hsa04728	Dopaminergic synapse	5	1.17067	0.425197
hsa04730	Long-term depression	2	1.03019	0.583159
hsa04740	Olfactory transduction	3	0.219189	0.999921
hsa04742	Taste transduction	4	1.45438	0.295755
hsa04744	Phototransduction	1	1.06571	0.615387
hsa04750	Inflammatory mediator regulation of TRP channels	5	1.57682	0.210854
hsa04810	Regulation of actin cytoskeleton	11	1.48455	0.123472
hsa04814	Motor proteins	5	0.800665	0.754183
hsa04910	Insulin signaling pathway	5	1.12794	0.457115
hsa04911	Insulin secretion	5	1.79684	0.145481
hsa04912	GnRH signaling pathway	5	1.66159	0.182499
hsa04913	Ovarian steroidogenesis	1	0.605993	0.814128
hsa04914	Progesterone-mediated oocyte maturation	1	0.302997	0.965821
hsa04915	Estrogen signaling pathway	7	1.59073	0.151431
hsa04916	Melanogenesis	3	0.91799	0.639934
hsa04917	Prolactin signaling pathway	3	1.32453	0.396066
hsa04918	Thyroid hormone synthesis	3	1.23623	0.439561
hsa04919	Thyroid hormone signaling pathway	4	1.02167	0.554116
hsa04920	Adipocytokine signaling pathway	1	0.447908	0.897629
hsa04921	Oxytocin signaling pathway	9	1.80617	0.0619646
hsa04922	Glucagon signaling pathway	4	1.15535	0.457445
hsa04923	Regulation of lipolysis in adipocytes	3	1.59857	0.289258
hsa04924	Renin secretion	3	1.34372	0.387253
hsa04925	Aldosterone synthesis and secretion	4	1.26146	0.391806
hsa04926	Relaxin signaling pathway	6	1.43747	0.239252
hsa04927	Cortisol synthesis and secretion	2	0.950943	0.626969
hsa04928	Parathyroid hormone synthesis, secretion and action	5	1.45781	0.258837
hsa04929	GnRH secretion	2	0.965802	0.618501
hsa04930	Type II diabetes mellitus	2	1.34372	0.441419
hsa04931	Insulin resistance	4	1.14465	0.464607
hsa04932	Non-alcoholic fatty liver disease	5	0.996957	0.566778
hsa04933	AGE-RAGE signaling pathway in diabetic complications	8	2.47245	0.0154671
hsa04934	Cushing syndrome	5	0.996957	0.566778
hsa04935	Growth hormone synthesis, secretion and action	6	1.54528	0.192711
hsa04936	Alcoholic liver disease	1	0.219189	0.990707
hsa04940	Type I diabetes mellitus	1	0.753797	0.741255
hsa04950	Maturity onset diabetes of the young	1	1.18868	0.575359
hsa04960	Aldosterone-regulated sodium reabsorption	3	2.50586	0.116589
hsa04961	Endocrine and other factor-regulated calcium reabsorption	3	1.74938	0.245157
hsa04962	Vasopressin-regulated water reabsorption	1	0.702401	0.765689
hsa04964	Proximal tubule bicarbonate reclamation	3	4.03117	0.0367757
hsa04970	Salivary secretion	3	1.00779	0.576447
hsa04971	Gastric acid secretion	2	0.813307	0.710655
hsa04972	Pancreatic secretion	4	1.22399	0.413879
hsa04973	Carbohydrate digestion and absorption	3	1.9727	0.193967
hsa04974	Protein digestion and absorption	6	1.80033	0.116403
hsa04975	Fat digestion and absorption	1	0.735849	0.74967
hsa04976	Bile secretion	1	0.347255	0.947317
hsa04978	Mineral absorption	2	1.03019	0.583159
hsa04979	Cholesterol metabolism	1	0.605993	0.814128
hsa05010	Alzheimer disease	8	0.645549	0.934112
hsa05012	Parkinson disease	3	0.34856	0.992851
hsa05014	Amyotrophic lateral sclerosis	7	0.595977	0.953522
hsa05016	Huntington disease	3	0.302997	0.997625
hsa05017	Spinocerebellar ataxia	2	0.435291	0.947567
hsa05020	Prion disease	7	0.798301	0.780336
hsa05022	Pathways of neurodegeneration - multiple diseases	9	0.585581	0.974393
hsa05030	Cocaine addiction	1	0.630728	0.801409
hsa05031	Amphetamine addiction	1	0.447908	0.897629
hsa05032	Morphine addiction	2	0.679245	0.798991
hsa05034	Alcoholism	19	3.12344	9.80892e-06
hsa05100	Bacterial invasion of epithelial cells	4	1.60549	0.238222
hsa05120	Epithelial cell signaling in Helicobacter pylori infection	2	0.883019	0.667134
hsa05130	Pathogenic Escherichia coli infection	8	1.25505	0.306244
hsa05131	Shigellosis	10	1.25633	0.274181
hsa05132	Salmonella infection	9	1.11707	0.41554
hsa05133	Pertussis	3	1.21996	0.448123
hsa05134	Legionellosis	1	0.551887	0.842487
hsa05135	Yersinia infection	7	1.59073	0.151431
hsa05140	Leishmaniasis	1	0.423365	0.910353
hsa05142	Chagas disease	6	1.83598	0.108627
hsa05143	African trypanosomiasis	2	1.71698	0.3257
hsa05144	Malaria	2	1.23623	0.484654
hsa05145	Toxoplasmosis	2	0.567076	0.872915
hsa05146	Amoebiasis	3	0.91799	0.639934
hsa05150	Staphylococcus aureus infection	2	0.679245	0.798991
hsa05152	Tuberculosis	3	0.526801	0.928332
hsa05160	Hepatitis C	6	1.17363	0.404187
hsa05161	Hepatitis B	5	0.959803	0.600784
hsa05162	Measles	5	1.11977	0.463444
hsa05163	Human cytomegalovirus infection	10	1.3859	0.186106
hsa05164	Influenza A	6	1.09724	0.467745
hsa05165	Human papillomavirus infection	15	1.40056	0.117505
hsa05166	Human T-cell leukemia virus 1 infection	7	0.983362	0.572685
hsa05167	Kaposi sarcoma-associated herpesvirus infection	5	0.796538	0.758175
hsa05168	Herpes simplex virus 1 infection	10	0.605993	0.972137
hsa05169	Epstein-Barr virus infection	5	0.776524	0.777412
hsa05170	Human immunodeficiency virus 1 infection	4	0.585889	0.91514
hsa05171	Coronavirus disease - COVID-19	6	0.802744	0.764114
hsa05200	Pathways in cancer	27	1.5804	0.0117902
hsa05202	Transcriptional misregulation in cancer	21	3.38031	9.0878e-07
hsa05203	Viral carcinogenesis	17	2.58816	0.000299773
hsa05204	Chemical carcinogenesis - DNA adducts	1	0.461279	0.890607
hsa05205	Proteoglycans in cancer	12	1.83598	0.0308433
hsa05206	MicroRNAs in cancer	11	2.11157	0.0152303
hsa05207	Chemical carcinogenesis - receptor activation	6	0.950943	0.608317
hsa05208	Chemical carcinogenesis - reactive oxygen species	3	0.419534	0.976544
hsa05210	Colorectal cancer	4	1.43747	0.303085
hsa05211	Renal cell carcinoma	4	1.79163	0.183864
hsa05212	Pancreatic cancer	4	1.62661	0.231218
hsa05213	Endometrial cancer	3	1.59857	0.289258
hsa05214	Glioma	3	1.23623	0.439561
hsa05215	Prostate cancer	3	0.955845	0.612561
hsa05216	Thyroid cancer	1	0.835288	0.704686
hsa05217	Basal cell carcinoma	4	1.96226	0.146226
hsa05218	Melanoma	5	2.14623	0.0830718
hsa05219	Bladder cancer	2	1.50759	0.384723
hsa05220	Chronic myeloid leukemia	3	1.21996	0.448123
hsa05221	Acute myeloid leukemia	3	1.38384	0.369541
hsa05222	Small cell lung cancer	5	1.67966	0.177008
hsa05223	Non-small cell lung cancer	4	1.71698	0.203766
hsa05224	Breast cancer	9	1.89218	0.0487851
hsa05225	Hepatocellular carcinoma	6	1.12384	0.444781
hsa05226	Gastric cancer	8	1.67058	0.106837
hsa05230	Central carbon metabolism in cancer	5	2.20755	0.0755947
hsa05231	Choline metabolism in cancer	9	2.83827	0.00432414
hsa05235	PD-L1 expression and PD-1 checkpoint pathway in cancer	4	1.38902	0.325186
hsa05321	Inflammatory bowel disease	2	0.981132	0.609886
hsa05322	Systemic lupus erythematosus	17	3.92087	1.31847e-06
hsa05323	Rheumatoid arthritis	6	2.08353	0.067979
hsa05332	Graft-versus-host disease	1	0.813307	0.714285
hsa05340	Primary immunodeficiency	1	0.835288	0.704686
hsa05410	Hypertrophic cardiomyopathy	6	2.06038	0.0709622
hsa05412	Arrhythmogenic right ventricular cardiomyopathy	6	2.40823	0.0379764
hsa05414	Dilated cardiomyopathy	6	1.95194	0.0869909
hsa05415	Diabetic cardiomyopathy	7	1.06571	0.486748
hsa05416	Viral myocarditis	1	0.542205	0.847618
hsa05417	Lipid and atherosclerosis	11	1.58861	0.0869726
hsa05418	Fluid shear stress and atherosclerosis	12	2.72697	0.00147071
