# Supplementary material for: Peptide-based Self-adaptive Implant Coating Sequentially Regulates Bone Regeneration to Enhance Interfacial Osseointegration
Source: Research Square preprint supplement (doi:10.21203/rs.3.rs-5132912/v1), 2024-10-01
Supplement: Supplementary file 609 [file enrichment_kegg.xls]

groups	Tested term	p-value<0.05	p-value<0.01	q-value<0.05	q-value<0.01
S-vs-C-Down	234	30	11	5	4
S-vs-C-Total	279	36	14	5	4
S-vs-C-Up	225	14	6	1	1
