# Supplementary material for: Peptide-based Self-adaptive Implant Coating Sequentially Regulates Bone Regeneration to Enhance Interfacial Osseointegration
Source: Research Square preprint supplement (doi:10.21203/rs.3.rs-5132912/v1), 2024-10-01
Supplement: Supplementary file 613 [file 10_translation(GO_0006412).heatmap-data.xls]

id	S1	S2	S3	C1	C2	C3
SARS1	203.86371677970718	203.00245709155033	205.2405287461571	122.06908255856695	121.630577868983	111.48516311676765
RPL39L	8.472604996629375	9.071823075905481	10.099464225251996	4.630321193197212	5.8694689244673075	6.116371306501456
RSL24D1	56.139237001979204	67.37420205431638	66.83610490934632	38.5484070053953	35.364934532607755	43.79591981703509
MRPS18C	11.054765817112218	11.115832649889036	12.63469629805426	8.442705555884345	6.430630865769558	7.8409737981892755
MRPL24	64.03250514796568	56.28410171810096	61.26505746402739	40.59396193609786	47.48134691198854	38.618162220177815
RPSAP58	23.532797015282227	22.06662983964921	20.999540512840333	15.861064563885899	17.104378833209285	14.95903646935891
DHPS	16.943931127063596	14.71348956942645	14.154961280088239	11.94668082142513	11.154186260580682	10.673044559632261
RPS18	2939.0138233683697	3050.765872392649	2941.9242564167657	2442.007629866757	2451.6048053152244	1732.668579370226
RMND1	9.266532590441233	9.386895130074134	9.235823803127072	6.246189322898888	6.254229520598821	8.310873903973105
RPSA	1887.0930684367208	1777.1666838693982	1874.2220822281788	1488.428117526128	1457.0528960748425	1193.6771953446587
MRPL13	48.11082845279746	52.03314156231504	54.34036396297274	41.93172848889153	38.96459783876243	35.48868415914957
GEMIN5	6.991382249618293	7.710794651963607	6.922186782794767	5.929465069083324	5.185549716475907	5.290062932192881
RPL26	1000.098935336472	1034.0111571422542	1015.0022474466564	781.7785782349533	821.6947604394038	711.5815363153158
FAU	552.8399060086582	510.95367171981246	532.5353490100554	440.9115725053538	443.68224596485163	328.65967166105804
RPL35A	444.9744821947991	455.8205854328598	491.38945939494903	409.8011474859657	381.1023492719529	254.1691125028461
RPS15	1096.5985947192135	1042.3108866976677	1091.4634251280806	885.3609418539972	944.1035735222628	658.7096651675139
WARS1	40.134164390201	37.070398076396266	37.8037338192714	31.652500580762677	29.85095485223586	27.290826684659343
MRPL22	11.451912647925154	12.12945667477469	12.125259972637012	10.06775559761494	9.275922721296968	8.254796365056052
MRPS33	10.92874017155179	11.93548532533281	12.180551835656646	8.822349350982115	9.56494636061368	8.808154637760634
HARS2	15.58035000530665	15.758267181352027	16.653704315955256	11.989078951653692	13.478749743519135	11.88596560767565
MRPL18	61.82691186936472	49.49382319445111	56.121596284669295	45.036981920919416	48.24248049816813	37.06283197840077
MRPL11	30.970985593754392	30.120380165918352	30.91990990706171	26.46627589872029	25.24804147920348	20.228375710036193
RPL24	795.1480603591147	892.5992414001828	930.6721855391178	732.0144141534827	737.0050624428751	581.5594369259356
RPS2	2908.5769644602947	2703.40814573526	2811.979393656592	2325.347298211641	2352.4802328514124	1925.7043023725523
FARSB	6.230399537080357	5.82785019762359	5.754246124698516	4.364660655660177	4.3219928945223645	5.291292626021866
RPL12	1746.3606313776543	1770.317825578628	1837.5970795272567	1435.5499204618302	1472.483387846823	1305.8216773388388
RPLP0	1659.8085657931358	1516.2772532900474	1565.1702789847207	1334.5387467215255	1369.4972090331985	1028.0634779977638
MRPL3	56.53283191506525	65.2561331658855	70.50810748592843	51.455157258858364	49.95873819322143	50.15256668063508
RPL37A	295.076895616937	311.40136742688975	303.9625115241484	266.7483450346286	264.06323537700786	189.185391803588
ZAR1	1e-08	1e-08	0.06791670584353769	1e-08	1e-08	1e-08
SRBD1	3.724461662882869	4.660684814827341	4.074714038960733	2.9428890947997024	2.6456818099475554	4.101690757255324
RPS14	349.3495682913157	366.2210762458837	356.97854594729324	301.5961308721416	288.75979695809485	260.3219770661293
MRPL52	32.94478642464127	30.942185640228463	32.95952790147394	26.65036368331607	26.2592468048453	24.156214954376857
RPS6	576.8437718053892	685.1193968656604	703.1082138607559	541.1076685565432	523.8414948210308	500.573170928596
RPL8	1975.0415218230348	1971.6462858038167	1992.1103067510167	1720.1217981298369	1778.9639873963438	1236.7819182614985
RPS12	1179.4643281440765	1390.9021262254064	1210.6981427211465	1032.3360913202582	1037.4174170082115	967.6975590450152
RPL36	396.0427981765342	383.9238445594786	397.4861394528692	323.62213630218395	361.98685891218736	264.33302708492647
RPL7	451.2568593370724	521.2668001479825	506.3348912854126	394.4169867486322	386.5067534836086	416.6672988948283
DARS1	46.079253096985	56.41061471365175	51.36950391753078	42.1486701735569	38.3337111492028	44.24332629475478
RPL36A	0.4909072178800825	0.5227280401973141	0.06515005988933309	0.1928529005073855	0.0325009240592821	0.2678481601873211
RPL10A	647.3099093447588	667.4127753756953	681.1683112328237	557.526751159356	540.5101937015827	523.2464332441033
RPL18	1064.5782153684731	1066.5635418603715	1100.341838059299	963.4950404964636	960.6711665541122	701.0108352739047
MRPS16	43.77510369610147	38.58035373195096	43.321713883939864	33.87814848118405	35.41670855886655	33.06645911978914
RPL10	673.099844007422	649.4385685763456	665.1187117590868	566.1418673969733	565.6965015968461	490.61719766735183
RPL23	275.4683648520426	288.71818361865724	289.4409541450515	247.5395014500441	236.34551804469385	218.03141324569478
RPL18A	1300.6961234852206	1240.7989172263956	1267.6319194505909	1126.6726955125612	1119.2746292437075	887.868719956636
RPL32	368.69382274405723	383.7942625430861	377.8943238087016	328.01316105843983	327.3442170552769	275.5341735660912
RPL27	877.3686797953015	939.9543918618268	965.266590362192	795.8415407401835	852.4529825995603	644.9644103181204
RPS4X	882.9405974247893	1005.2850850853604	991.684666763844	806.5219964322978	798.6607265574993	771.3032062121655
RPL11	777.3859522709358	872.0363423490418	932.340428878032	757.6562618916063	713.0220191158662	661.5280388967213
MRPL37	63.09896694691015	58.22717878712781	62.014227814602975	51.64697113520037	50.60401113567578	49.56558645762732
RPL37	150.23130927689033	157.46640062676516	153.46437939807714	134.6908431928843	140.64575932338064	107.20851667532665
RPL21	807.1800454810306	862.2720945484785	861.0661090270357	697.676792109908	681.4301275233901	720.2559798423372
RPL28	196.0187764002504	192.63459768909905	190.8865315817496	173.4986267757269	185.0671878501004	118.27117428113685
RPL7A	1985.746110636384	1955.79311286734	2008.6278569935155	1778.5608154761892	1724.7709287396242	1455.5520738330217
RPL9	438.582807483606	453.9475115536814	473.1383504725754	398.3514205594696	396.82477429918106	344.4583392810293
RPS3A	398.1563752807231	431.9025892160423	435.1922923424055	351.71143721704027	336.3890728099495	370.042454535637
RPS20	297.0031915623664	330.124774422599	322.84361733985946	279.9909387538041	282.0251722462869	234.77223958878452
RPL3	1280.7619306791005	1308.8172363921924	1312.318259252441	1168.2753311509273	1153.5860141918088	960.812029304133
RPL5	1061.5788144426117	1240.4038689855738	1222.237909565295	983.2133746398064	946.5259222519568	1035.7929956140872
RPS19	310.40336481947264	311.042641255122	316.5174644885449	287.62689212103203	288.26058598925187	213.9642456520161
RPL13	447.3742367219069	438.31950256548583	455.0826035566913	402.21098507244415	412.44147524710337	315.1941363354265
RPL6	186.7616594638392	219.01568711593205	220.59898594089424	178.8355049508524	168.4286092551591	180.63857888129172
MRPL10	30.752382387265303	29.11063080609611	28.03102678708804	25.611099482950184	25.063951568091433	23.422053804884563
PABPC4	56.207479565062656	53.93415316007844	53.09012665254466	45.77524784023488	45.93195300835403	45.91419830171014
RPL35	1708.5517085912093	1641.458677624742	1755.454257099344	1458.7896814698736	1413.6225113097848	1434.380621297683
MRPS15	66.11810945720245	63.0295914874434	70.59701792140281	56.69729954384923	58.2644534412804	53.925765501090794
RPL22	298.6226258868205	321.36360582366314	332.0434408114053	277.9986113324522	275.35331054938064	253.94990476337162
MRPS18B	26.69636451754559	26.87040674048605	26.262243140389764	23.644410914047533	22.632356170522993	21.535710106307864
RPL41	2225.4190914719375	2248.084540844138	2301.1417337680027	1998.0634031449522	2060.7947368740206	1699.8223585439819
RPS8	1265.595589449008	1338.6948533028756	1361.993823658698	1167.1087588096873	1112.6758945716695	1095.5993773324635
RPS13	577.643649378727	655.0519319549082	636.2505658782869	578.086297832922	526.0145280457991	492.27275319376616
RPS9	634.5940465475151	582.993504704871	613.8104158789223	562.9665656029438	564.927120833178	438.8866892332903
RPS21	234.42616038585084	258.7637010834403	237.54717392978696	214.6409610195732	229.802747397698	181.72113295996084
RPS5	1068.6785360168044	989.0881576739692	964.2516428829756	903.3429791905464	899.9078091162131	790.2633301735809
RPS3	642.5839570971215	641.7740545046755	618.9634621509825	581.8799834440064	553.7993969748265	498.16528730789736
RPL34	101.4937261683842	108.15176939600072	99.58544803837289	91.19412132401841	91.55349695362594	82.94160754818873
RPS15A	202.27266613014288	209.05508619578106	209.8957315410353	189.78564247587425	183.12444550121344	161.3519293349764
MRPS18A	30.79501854460293	28.949197470028484	31.63488202133204	29.0277202415422	27.907318764587536	21.71322520735001
MRPL23	19.16603742141733	19.52928394669501	18.0850678224282	17.344353905237448	17.939751691547254	13.590362531987575
RPL29	736.9151889437987	718.4773346493572	740.7972418401507	672.3810030970515	651.0690733415196	567.669548950683
RPL19	984.9838272926588	1035.311652920721	1076.736343431338	920.2735316660968	904.6532586697124	841.957747384206
RPL4	670.0731870881708	688.4694076955118	714.7922511730103	607.0781617768	590.1136540745152	591.1122235518476
RPS17	1964.2060498825458	2007.3721076751035	2076.6364795603986	1816.8697160824079	1888.6430344472383	1521.2249074474428
RPL14	75.82941919133062	82.39453420851552	75.53600499374265	69.39409218799554	67.76327175303132	65.23295125518136
RPL30	1121.8914031048498	1190.692186114006	1149.6298655418748	1020.8930446947932	1066.5569789075225	911.3111099786056
ZAR1L	1e-08	0.06278347448550439	1e-08	1e-08	0.0156144011610566	1e-08
MRPL51	141.72203181069452	148.5367278919973	158.42703772471378	131.91606600507257	127.30159250343367	133.5806150313435
COPS5	21.676886558452974	22.11896334526813	21.882172476379324	18.477246361970405	19.79037334046365	19.71874418625666
RPL17	32.67298216482981	32.616430610919856	31.413444395826463	28.24177483596776	27.031901902507624	30.76157614239912
MRPL34	29.588888926025202	26.264878991336353	31.89192235745856	27.057715658252285	26.40213911746095	24.689881017781392
RPS7	538.1530922374027	627.6699669254101	621.2976655975999	564.2548007456487	507.63870312623493	521.8681365011582
RPL39	1610.3549698401298	1593.0966048487976	1586.7247040995248	1421.826066744038	1391.527635486288	1461.9097952601353
RPL38	314.3513087065547	336.78037339985923	332.18055938074286	288.4805261855938	286.7970637387619	303.41215619547364
PDF	1.1411689609332702	1.3739894489398532	1.309279020638888	1.0694375295007021	1.444716227226997	0.8644520431574626
RPL27A	244.7040765053541	240.695106737574	253.83778959842812	235.8208972514309	235.6934467600104	194.25321644508722
RPS25	1284.3533795104097	1401.911866436572	1435.7434825719051	1219.0080147628962	1191.136361978909	1320.1104731909259
RPL31	223.94213277384304	232.5421865653912	222.37215927464652	197.21548720543706	204.65211237583696	212.8766191573221
RPL15	173.55391299647192	167.95507020433004	175.1331793231044	162.56235303004655	157.48053448104605	148.060480459369
RPL13A	2239.869098051186	2248.3682279068244	2319.465746151882	2154.535551821368	2194.6047559207086	1822.3289533633047
MRPL28	50.82018160611168	48.95297104852537	48.82560943798722	49.338604951782074	49.71701256958634	36.79052949282276
ABCF1	40.24354928758157	39.73579297244509	40.91557069541818	39.20811597340015	37.68452828259964	33.852348355503025
MRPS12	22.78961250501165	25.80766120273565	23.044695387299402	22.916571682727533	22.151818398526572	20.655350654936942
MRPL12	69.70538539457888	66.8003617535086	68.7671690467816	71.61085906901215	69.32158291812038	46.56429926513686
MRPS21	28.67350749717857	28.123404472963948	27.01099916798152	25.20668678878821	27.929238417051106	23.77493666376593
RPS6KB2	22.58400644527439	21.497534332979733	20.207631124015624	20.982424963694932	21.229651840729492	17.13362486568642
MRPS17	14.725677007676756	17.317268435927847	17.627538844418762	15.311576487967764	15.524027034975608	15.350203530911624
RRBP1	79.43670065314181	75.8473493017823	81.24741558315995	77.62920249267486	75.38015724492995	67.20737935373636
MRPS5	23.154612327162454	24.770266870385644	24.920617216902322	21.738786570112445	24.04688864877887	22.280706654623827
MRPL55	14.447568894108333	13.52773200919285	12.50851073531211	14.085746485619177	14.155696291496964	9.69175075062149
HBS1L	6.199185212711612	6.757052844500975	6.587002006517644	5.570602558604293	5.922180979429305	6.886743918432256
RPS24	263.69241649150644	277.5772507868852	281.2231015128385	248.68852543257	254.2513099094724	270.9905880278701
RPS16	1300.22440402533	1337.732985390323	1343.0086922070786	1191.0690147368612	1188.4879637437186	1370.4292422761566
RPS27L	4.235133891281132	4.773064088761487	4.450766720185222	4.199463760961546	4.132993906349438	4.353540716903102
AIMP2	17.1461245230585	18.284995502960953	18.9750249476652	17.26664991594165	17.780444115719146	16.263712113244086
TNIP1	89.5664774546849	83.62673239237331	85.35934853320038	88.29059670646022	86.73209672644474	69.40431359060662
MRPL9	54.87724940409669	54.802578215905896	61.89297322218603	53.69647883349339	57.286445699123604	51.66586211887586
RPS27A	426.96841843667727	512.1623898969508	508.61486055533896	429.4539624940777	424.1293350882559	520.7918900674688
RPLP1	715.169900393452	767.2355412355148	775.6355671084198	736.6387950623724	788.3653428672684	625.2134793076809
RPS27	998.2613763439446	982.7826814287608	1027.919191601943	958.5121637765568	994.6217442654536	915.3699639954496
METTL17	20.845361325114276	21.11174192181181	19.738186459881184	19.84785486279244	19.557879741659242	19.419255651162324
MRPL35	9.67398243658232	12.036750080980461	10.08502278203201	9.468454827814217	9.818109380056057	11.343647658245828
YARS2	13.540891943914374	15.055931508481342	15.047061071887233	14.927985853296137	14.300156558566435	12.950148091411508
RPS11	2005.3812463401127	1894.6077326396367	2006.3131255886772	2023.791333371021	2069.6030181438637	1631.1041990011363
RPL23A	906.323987436792	1013.3033691317452	1016.117790483976	911.7845419669004	963.6256990633034	983.1500621965856
MRPS11	5.394552584327839	5.055611917087696	5.571717849923755	5.836917139684576	5.639753768884172	4.162497110661168
EEF1A1	3453.264184038767	3836.0500870569285	3921.640359282948	3656.238975056263	3582.418869522056	3753.7859764367176
RPS28	95.82009179204174	112.21661532832125	103.44529820928307	104.25919682878775	113.2148081358677	90.34528176297671
MRRF	3.528745256589061	3.9326415389497518	3.6139396480210335	3.780729626949237	3.492284751600068	3.789039847698189
RPS26	143.1839675292662	147.75592708733316	153.34755857785015	139.42299720231438	142.64979041716882	162.3731023406344
RPS23	232.0441183182433	239.9299054576137	250.86123875015028	233.97375832668084	223.99817860320306	265.2971374818666
AIMP1	4.486163022501158	4.8691027464185614	5.592110176806326	4.290243604790272	4.3381306338391346	6.328863016295424
HARS1	45.4382166078516	48.66517795299714	45.92692233251261	48.61899251050805	50.57100518005636	40.978377942659364
MRPL32	31.109953701587504	33.661000012177055	36.91023365856569	34.93903919366312	31.614725001649386	35.830848422311135
RPLP2	1075.6204077777645	1136.0219445434273	1254.5573526376636	1228.356101574094	1096.5585399594493	1190.5116157484488
MRPL36	27.436391443148324	28.94532096343412	29.545971374974464	29.84936797258221	28.8755031647376	29.808423227376167
RPL36AL	135.2110467232195	166.05483357836212	157.09855122702098	158.5931165608964	152.24086818738462	163.2770229410896
RPS29	26.768594527443266	28.98488713751053	28.817239482081572	29.12829720883385	30.82050111055507	27.78417325343731
MRPL43	16.134020810999303	16.294136185260008	16.645955588120348	16.923448903925095	18.405531624861645	15.810252336785782
PSTK	1.4824618560188203	1.7018803508749232	1.2542354198486652	1.4377632694758815	2.300334422119948	1.0047544223423754
MRPS14	12.764732478188153	11.837488284143532	13.31488358662623	13.878113454550391	12.360750718398661	14.311639575221692
EEF1A2	638.914466649919	585.5319751089634	596.3624095713428	690.5412277302978	699.5323330687448	572.2512468043942
GUF1	4.377982401543293	3.985764614131328	3.868510640513973	3.9542121481346335	3.726616028521165	5.678515919159082
MRPS7	47.34914185470344	49.99295012435618	48.611487878443754	53.16634372572635	52.03420636594265	52.926177145970826
MRPL42	1.6886345703366048	2.0036802110327585	1.6871581094782677	1.7967853546851498	1.6562975559046564	2.3923457538095882
MRPL27	34.48992867247868	41.42500578717915	39.38871348135784	46.60269484155717	42.58003499914469	40.00137398031303
PAIP2	25.27643679080988	27.8429654493595	29.204649885894078	28.93521735778673	28.915385301548707	34.8107813665285
EIF4G1	109.50144754293467	104.22371763222563	107.46164764097513	125.74095754046199	126.66866631706763	109.34658257511991
EIF2AK2	5.448500932628488	6.460707599809097	5.8951744873769005	5.6505047721561805	6.059560851360472	8.593673990470887
MRPL41	57.12827197307578	48.61381908811614	51.06997111908354	60.477992702994634	61.960479706748714	57.96266186466882
EIF4EBP2	13.694456527824796	12.505802345579596	13.72015174582528	15.914950308611903	15.154901598563848	17.278547714681636
CPEB4	0.718325156649416	0.9194013743507676	0.8145736070892372	0.9120914119838549	0.8840563421891685	1.3280183428186934
LARP4	2.865122079397998	3.4897245232100023	3.15754816302708	3.6041515246394984	3.3555296028507215	6.157021228561843
RPL3L	1e-08	1e-08	1e-08	1e-08	1e-08	0.039289224011671404
IGF2BP3	10.638625908729999	10.979942249525433	9.990018893930698	12.234109215161633	12.15513346046873	16.174717612999448
EIF4ENIF1	5.09621298077764	4.642194861194845	4.749691059627708	6.585891164275954	6.284961483256789	6.341767148721128
EEF1E1	3.118367165231576	4.088366981154566	3.7660318170836478	3.899744095717723	5.1407059400328095	6.444201806185629
GSPT1	16.653893030764433	15.980585985021746	16.03938523210027	21.45706861753527	21.396734092906186	25.045313318515397
AGO2	5.509098756063461	5.148330792276103	4.880504810816714	6.769449882203014	7.036790536552233	7.998656114886553
RPS10	1.6019223737077155	2.413810877598034	2.0758276614799724	2.820044451592118	3.421825614731747	2.84474890121886
CPEB2	1.0004390986409024	0.9723486544620377	0.8380979571185997	1.6683285874232083	1.3693723661766322	2.3711218943667625
MRPS6	32.42244375210184	30.39016403090612	32.27173782661033	55.041961891753	52.04331921372041	51.8338675854689
CPEB3	0.2125185055730684	0.2211783587430515	0.2205319826146826	0.3441655071526062	0.44679611786343687	0.4833989347361025
