# Supplementary material for: Peptide-based Self-adaptive Implant Coating Sequentially Regulates Bone Regeneration to Enhance Interfacial Osseointegration
Source: Research Square preprint supplement (doi:10.21203/rs.3.rs-5132912/v1), 2024-10-01
Supplement: Supplementary file 617 [file 1593_antimicrobial humoral immune response mediated by antimic...(GO_0061844).heatmap-data.xls]

id	S1	S2	S3	C1	C2	C3
CXCL3	14.271349918911227	12.905243340635296	14.135833602104507	10.62595507957337	9.387110525756635	7.442254298355945
GAPDH	8124.22594743182	7603.597661787326	7683.470926703725	5401.954037799848	5446.475427428458	4951.400305494479
HMGN2	329.6750615856823	312.71330387426497	333.36892651497436	216.28342321826202	226.00276206437536	219.04107427257551
ANG	4.324677999237059	4.317192693509759	4.644858731571253	3.0218472922811332	3.1913800873049913	3.165208662621122
FAU	552.8399060086582	510.95367171981246	532.5353490100554	440.9115725053538	443.68224596485163	328.65967166105804
PGLYRP1	1e-08	1e-08	0.0700271116465854	1e-08	1e-08	1e-08
CXCL5	1e-08	0.0918556206019448	0.07123447546807829	0.030123378160123202	0.020306410327679502	0.0209187746030943
RPS19	310.40336481947264	311.042641255122	316.5174644885449	287.62689212103203	288.26058598925187	213.9642456520161
RPL30	1121.8914031048498	1190.692186114006	1149.6298655418748	1020.8930446947932	1066.5569789075225	911.3111099786056
RPL39	1610.3549698401298	1593.0966048487976	1586.7247040995248	1421.826066744038	1391.527635486288	1461.9097952601353
FAM3A	21.05150932452525	22.06640391253537	22.220783835742218	21.698175647524305	22.07828474322369	16.551914178505275
CXCL8	65.07099875320976	73.80150490728415	75.99492150565645	67.49724661760345	59.9581695163062	72.00494925523073
ROMO1	192.0886329167773	191.863555448998	196.49634972319853	199.11533342587393	207.4810620120681	136.4202549892751
TSLP	0.0630287565986309	0.026965576091388003	0.2330186085376619	0.0442157998518077	0.0447093295934809	0.15659579447999689
CXCL2	49.31931184942649	48.27513493556266	46.55552449446126	45.300682757561816	46.67142919433649	47.941756055938654
H2BC10	1e-08	1e-08	0.257153474552814	0.2029890137014112	1e-08	0.0528611205530475
H2BC6	0.26495063779910827	0.5818825021252282	0.10548764396975	0.7286009658388956	0.2104952916945845	0.1084215218577401
H2BC7	0.1053080819370663	0.3679403134964445	0.6289114852530554	0.8791183484404674	0.3660303888452342	0.3232015569755043
CXCL1	303.3616983810063	300.062391564399	316.28903601487923	355.50593280722353	341.2296159545011	368.68670461667193
CAMP	0.042141057399519705	0.042068118183180604	0.5033420198048988	0.45526553352998417	0.3766476587174672	0.25867062204638497
CXCL11	1e-08	1e-08	1e-08	1e-08	0.016722927916912503	1e-08
H2BC12L	1e-08	1e-08	1e-08	0.1571317548352466	1e-08	0.0545590148962932
LEAP2	0.3181869428040395	0.2887601950901248	0.23033305513720098	0.4545444921560058	0.6319748104419292	1.124511160859023
CXCL6	13.870518757708169	11.209850752893955	14.273774033980983	26.147083572986965	29.544663067887264	32.12648611629185
H2BC8	1.018624100515999	0.5592735709383584	1.2166671993443565	2.501040393028636	3.995751446257629	4.585187873431626
H2BC11	1.4528126190984438	1.81287254701894	1.3944146715376335	5.605456768462932	5.668024001463553	3.5033701119032266
H2BC21	3.516314187211548	3.44315360548921	4.023850472150965	9.447522617298217	9.57521647170723	10.562809800564995
H2BC4	0.6364931092634805	1.3015276257893604	0.5517881695532268	3.428054206886571	3.77216916567686	4.127480936472212
H2BC12	29.790964962554984	26.544027725488142	25.544181408379497	101.56349981404948	102.94809262773136	102.54817066732927
