# Supplementary material for: Peptide-based Self-adaptive Implant Coating Sequentially Regulates Bone Regeneration to Enhance Interfacial Osseointegration
Source: Research Square preprint supplement (doi:10.21203/rs.3.rs-5132912/v1), 2024-10-01
Supplement: Supplementary file 621 [file 1594_myoblast fusion(GO_0007520).heatmap-data.xls]

id	S1	S2	S3	C1	C2	C3
DYRK1B	0.7962777119071651	0.897213280254388	0.9181331204774542	0.5187818148063769	0.7907732786009756	0.524260406842982
CDON	0.7747190518450972	0.9446057711228164	0.8194907201782237	0.5980277032394713	0.5223723688426214	0.7808663738101358
KCNH1	0.2936952813810871	0.287323204546398	0.2894068265455465	0.196142922302991	0.1399992303723415	0.2884421453196482
CACNA1S	1e-08	1e-08	0.0245522655129329	1e-08	1e-08	1e-08
MYH9	458.6015517424592	461.4548744259316	465.2598565862264	410.52452792902403	418.1008793129612	304.00811330242215
ITGB1	337.2789188970054	386.8464948052394	348.68269417592273	291.6110530987299	280.3792962268746	349.7521774433717
CAPN2	135.49594236655628	140.46723567875998	143.66399246458423	128.05421219616224	126.92847950781196	120.75841061146397
PLEKHO1	1.6052282276422543	1.72384755636176	1.872130805582934	1.6641199851686825	1.5941317575991238	1.4763254790785378
NEO1	4.364374054865935	3.9228073183261998	4.2741827243859785	4.283076165446509	4.108360820541644	3.722467064087148
DOCK5	3.05544300561549	3.466931376650193	2.9785586427073882	3.0649666777069533	2.8837636849294372	3.5958921543022444
ADGRB3	0.1308656074416614	0.11022674272233379	0.1465394818200468	0.1606579735206572	0.1015320116383977	0.129696350539185
ADAMTS15	0.7694468307990113	0.9631287067464158	0.8095209276420391	1.0689335397364295	1.0016805745230928	0.5220616518570229
CACNA1H	0.0053855347082097	0.0241929246314561	0.0375234520759517	0.018512414002826202	0.0294156388885555	0.024793122507202902
DOCK1	5.854951348863887	5.74111232830875	5.517530396781837	6.260433540857558	6.590291721318018	6.937819018539331
TANC1	5.45760242519757	5.753391180795343	5.303032218292816	6.7425546048028435	6.164678829700329	6.557153223661818
NPHS1	0.5039566874108424	0.5569863225738408	0.5060928952875724	1.2462094652443823	1.3271470909280512	0.9943046065490313
JAM2	0.6443129352566529	0.6577059550167917	0.6123864009409047	1.4035696674744054	1.5779980952964963	1.392650182247786
DOCK2	0.06454077450903789	0.07731487608343769	0.0844307313988596	0.1503179813105038	0.1867900256308008	0.2339258840955536
ADAMTS5	0.0324353603476768	0.09962834875479759	0.07201946757401789	0.2670966909373058	0.2824668801962492	0.3394825138182395
