# Supplementary material for: Peptide-based Self-adaptive Implant Coating Sequentially Regulates Bone Regeneration to Enhance Interfacial Osseointegration
Source: Research Square preprint supplement (doi:10.21203/rs.3.rs-5132912/v1), 2024-10-01
Supplement: Supplementary file 625 [file 1595_tissue homeostasis(GO_0001894).heatmap-data.xls]

id	S1	S2	S3	C1	C2	C3
CCN2	12.10114964169375	11.144414051574088	11.419329659090632	8.850858865574413	8.515920650413394	7.900904664731594
BARD1	4.00684189429561	4.805197661321959	4.041158238924791	3.2387204513310066	3.107605650322879	4.448292096870282
P2RX4	16.87137224469161	16.93732418308893	17.15889885217624	14.189308712967351	16.20031074140415	15.295791537967565
HOXA13	0.0744926092416236	0.0694060971600471	0.15817887489581658	0.0975480656172285	0.0641139766577224	0.13209481308091559
STK11	26.96252806398093	24.552700677086765	27.5899975645996	27.67646883747366	27.91779170204541	23.95479963563541
BAP1	30.580680346267425	29.679944067061374	29.713968007354648	33.17183672299229	31.935609266663423	25.885892715217793
TRIM32	13.542650689479132	11.368718878865486	12.80763687025443	13.774242601600767	13.787495310409616	13.821713192825024
TP53INP2	18.55716727466557	19.130286464057622	18.766728438098113	21.512110911213345	21.256381239691734	21.374434218183715
SOX9	28.83344922615156	27.822194430658012	30.62281058769524	34.24175598251295	33.69276582868577	33.04953013114345
NANOS1	0.0185999793899299	0.0433248204440672	0.012342352037785	0.07915915222012959	0.0123142721852694	0.0761136927081969
SCX	1.2738400742463822	1.5925151913856628	1.3982658273906161	1.9292203092797848	1.584248676482425	1.8756092423764887
RB1	9.619805486342557	10.787319264566849	10.05151492973928	11.583709348338726	11.831839976987744	17.761355241101008
ACACA	10.088991597618344	10.017135558660181	9.369585764100584	13.667473277728895	13.387137034636227	13.2869248767773
YAP1	26.23284273218888	25.09846335757043	24.893382953206103	32.818386105046564	33.590945530599804	38.3498759783671
COL3A1	1e-08	1e-08	1e-08	1e-08	0.0180205532416128	0.0046410036769706
PRICKLE1	0.7368879096738938	0.7790969588843968	0.5600331053721245	0.9625779484091849	1.0129759556858977	1.010101021215092
CD34	1e-08	1e-08	1e-08	0.0029961117817271	1e-08	0.0031209133912994
NFIB	1.505235522562695	1.8347479332916292	1.4114137262206559	2.3968062704921507	2.469894756641148	3.034159725644193
WWTR1	18.72748584809307	18.59615592980404	19.06067208298939	31.331533563931604	31.3175907011455	35.184102821395896
CUBN	0.0087793948748999	0.0052585235228975	0.0087385865591128	0.017244916194317502	0.024412357602058003	0.016166923252899
