# Supplementary material for: Peptide-based Self-adaptive Implant Coating Sequentially Regulates Bone Regeneration to Enhance Interfacial Osseointegration
Source: Research Square preprint supplement (doi:10.21203/rs.3.rs-5132912/v1), 2024-10-01
Supplement: Supplementary file 629 [file 1596_nucleosome assembly(GO_0006334).heatmap-data.xls]

id	S1	S2	S3	C1	C2	C3
H2BC9	9.757294341978419	10.49380764543431	12.555768390944927	4.235528139180963	3.5333136670162397	4.301658694745401
MACROH2A2	1.2633153222595164	0.8235942770396605	1.2702742358313845	0.4937613054941938	0.4608670087412487	0.3428858471898509
H1-5	0.0624977741483467	0.0623896008061725	0.0933109032856634	1e-08	0.0310328777529657	1e-08
HMGB2	169.33101144952764	199.37399990217614	208.03009629271864	111.23369922208613	115.2216514927887	126.74488575269608
H3-3B	175.77382955506508	185.9475855635937	188.4559004403793	126.56897181016372	124.616903085904	125.79400494609169
H1-10	137.11090127877816	130.21522453104382	137.3729413360353	100.87401964226743	103.27251197727543	78.65565881022594
H1-0	351.466144014062	341.9010861879024	356.4235225707265	270.3049097129332	269.6524306139486	271.96926256527246
ANP32B	257.7528321969907	258.7317155408811	262.054258182479	195.7638681383292	197.1984523120365	210.73910462568065
H4C2	1e-08	0.4485457923552017	1e-08	1e-08	1e-08	1e-08
H1-6	1e-08	1e-08	0.0342397806946011	1e-08	1e-08	1e-08
MCM2	47.173846360986175	46.781682691085976	45.16730167794749	39.706994195719204	40.10807450836403	30.70793891058804
H2AX	74.27804309685656	68.57421373620386	71.53479571188596	58.63067060925413	57.63828874914055	54.35105010622366
CHAF1B	6.402951794319752	5.886389876528788	6.612997125947548	5.0011212032590615	4.870399733649045	5.2261515370532425
NPM1	387.76770918331033	458.609924909891	453.78220794589606	321.46852618017977	325.72979740201737	395.2191652461745
H3C7	0.3024942490257026	0.0503284552151007	0.0501813743378365	0.0495145341822268	0.050067207569056	0.0515770449930545
SSRP1	149.2385199301501	147.34716926012283	149.43539430096786	121.23197165264689	123.95110599772977	118.48785336142747
DNAJC9	32.610284905169564	35.554645262638125	35.20230362230615	27.007443719461804	26.85626294376527	30.48605047488813
H3C2	0.0974769532998676	0.3892329170255929	0.4366073404227424	0.2872036297184352	0.0484015669454279	0.1495835048330856
POLE3	38.35732762587956	41.667292606879776	39.98251094007771	33.42243482380784	33.98088073611915	34.073181087673525
ASF1A	4.062213456264225	5.3830759222468725	4.939586321299204	3.698169434870741	4.034132570742864	4.438422130585548
SETSIP	0.6800098124059026	0.3394164186861399	1.2126877702552041	0.4452364140231183	0.6471712259039986	0.4637825863197984
H4C1	1e-08	0.2473856014055696	1e-08	1e-08	1e-08	0.0633807445437037
NAP1L4	37.95375749165947	38.59739228107529	39.999117217552794	35.95716208482661	34.38413129822029	32.30039315282902
SET	112.94209973537211	124.59431042198571	126.09056494342367	102.35310195651985	98.1397570828772	120.90711552414585
ASF1B	18.84490754035079	16.501234125184833	17.612500175464486	15.611645120603688	17.382062281253962	14.255599326641581
CHAF1A	10.295136849333478	10.196801463386201	11.445762117298397	10.348753185172496	9.691888361815542	8.764134918889196
NASP	60.775721458623124	64.2890492860531	63.55246123660571	55.94393561273782	56.515876915676394	61.1481875761592
SART3	13.32349626526845	13.717704050355906	13.440698286038481	13.102443372693266	12.873945411589942	11.331943480110377
CABIN1	9.4518553605164	9.346760685045968	8.862320819878311	8.999986389675726	9.120059378635508	7.4769997107512225
SUPT16H	48.646767198871615	49.1992450387957	45.81789874790466	42.49994546678518	39.95524770212345	50.49594248681725
NAA60	9.856002054764398	8.908027568288501	8.753707474278194	9.106482189294537	9.36623907401748	7.252029444685522
TSPYL2	10.060543535053064	9.89635051959658	11.150814197127065	9.786291621009845	9.816899625633678	9.603821939088197
H2AB3	2.2334755221745475	1.4303156882281411	1.0066840296097976	1.572735454921764	1.7995387760945656	0.7760118461391551
NAP1L3	2.425663515241214	3.1253793587257443	2.994590449609364	2.4284734002617125	1.9607289929421943	3.5395592193081784
MACROH2A1	15.995749589323	15.632035306037272	14.967952261949637	14.158867110743001	15.577634402243751	14.223247740253337
TSPYL4	9.854333452203315	8.579653584307536	9.573413250474543	8.167271459631698	9.244873948676492	9.207654717159881
PADI4	1e-08	0.0082489323411611	0.032899272087446904	0.0162310484512409	0.0082061133839129	0.0084535784427899
NAP1L5	2.5334089862950733	3.216399843172884	2.4828388439672002	2.6667587808493445	2.2965617296881766	3.070246108694533
DAXX	38.31219223697896	35.407812286698324	38.59927789657384	37.11100038744481	38.14404091637353	35.63880369074417
UBN1	4.964462088198038	4.756283602598042	5.106711478872747	5.108330976249219	4.89043426394356	4.694917941031349
H3C4	0.21241245360866678	0.1855392035541772	0.8192723058098392	0.0782308467143498	0.5273602573158568	0.5704266208933342
SPTY2D1	5.196394421486851	5.096393295173692	4.809276304746031	4.532188604669572	4.578465013705548	5.9423001622449405
H2AB2	0.1264231521985593	0.2944767672822644	0.0838903449674831	0.2897144340645354	0.167398964985541	0.0431117786743975
H2AB1	0.1272846386871355	0.5082572897872522	0.08446199972024279	0.4583678539628973	0.2106745892088048	0.043405555632996404
H2BC10	1e-08	1e-08	0.257153474552814	0.2029890137014112	1e-08	0.0528611205530475
H4C3	0.4919577189010604	0.0613882863858265	0.428462128222812	0.3623729721632602	0.1832088662897309	0.4403787433481048
H3C13	0.21241245360866678	1e-08	1e-08	0.0521539011428999	1e-08	0.1629790416838097
H2BC14	1e-08	1e-08	0.10593844582432159	1e-08	0.0528487185451147	0.0544424358260019
H4C4	1e-08	0.061692942844317	0.5536137714045196	1e-08	0.1227453975886535	0.5057877079964055
H1-4	0.0316459553788007	0.3475028960214196	0.2519908001691615	0.5283646530525301	0.06285438255175009	0.06474983283753219
SMYD3	3.609337397196775	3.2746916357478573	3.6141838056364826	3.468620457173936	3.417958130799635	3.702003556933254
TSPYL1	20.153065010757327	20.819011684597164	22.111751000061695	21.499688573828788	21.588525559551623	21.16474256422855
H2BC6	0.26495063779910827	0.5818825021252282	0.10548764396975	0.7286009658388956	0.2104952916945845	0.1084215218577401
H4C11	0.2560962466387268	0.1278264981041632	0.1274529353619088	0.6287962811059142	1e-08	1e-08
HAT1	9.351860605590185	12.358598988817567	9.66128868011165	8.716613112117303	10.04335131512434	14.098212398437553
HP1BP3	28.218734485512908	27.594556977909722	26.41172464439784	27.462047700305412	26.926128448244665	31.295646701043054
H4C15	0.4210147190872383	0.0373587657269117	0.1489983209414952	0.2848480277785957	0.1858241692720787	0.2201421105225714
NAP1L1	37.33386862629264	39.15640954776664	38.49552783508874	36.50375062783349	36.54772845768517	47.95028920832661
HIRA	13.96125727074512	13.256187139103707	13.474333971092884	14.761803098567745	15.1462599352406	14.490309024443961
KAT6A	3.3311498652356124	3.4279290798722077	3.2353305023168506	3.699172102396239	3.431995039121833	3.8132260000550953
H3-3A	108.28489539745624	123.02815419592875	124.57934028058891	130.30125367686827	132.2529721881025	129.03467946396432
H2BC7	0.1053080819370663	0.3679403134964445	0.6289114852530554	0.8791183484404674	0.3660303888452342	0.3232015569755043
BRD2	50.21586827424505	49.488196607672954	50.113856608570174	55.908332618294814	55.863297033989724	56.36501666752946
GRWD1	10.475953111021637	9.771453998005837	9.89086767077307	12.013363306562365	11.224746305960377	10.760041265137483
H4-16	0.3626994131036337	0.7241432702794103	0.1203378448684042	0.7718016466462642	0.8404484041446397	0.24736947880164
H4C14	1e-08	0.1883504034565132	0.2503999492211238	0.4941449584044457	0.0624575746442264	0.2573642048138275
SOX9	28.83344922615156	27.822194430658012	30.62281058769524	34.24175598251295	33.69276582868577	33.04953013114345
H3C1	0.588315577238965	0.0489414508194089	0.2927904901128889	0.7703992208982697	0.4381865462047699	0.4012449751428177
H3C11	1e-08	1e-08	0.0493816713205005	0.1949018023985662	0.049269323942457505	1e-08
CHRAC1	23.35943992274541	24.451388451948322	24.349955889204356	27.99955536941031	29.009915041608558	32.082454147541846
SMARCA5	8.871156649627668	9.900896798776007	8.946062492373436	10.055920449156348	10.193913396568588	15.349108146586094
RBBP4	20.155819452524433	19.227641080303396	20.02787424416755	24.63225658880613	23.73578910316952	25.866362544015512
H4C5	0.7858487167245398	1e-08	0.601689184342021	1.5436032832925282	0.4202242070723198	1.1131626196073798
H4C13	1e-08	1e-08	1e-08	1e-08	1e-08	0.0658373621616768
H1-3	0.032094544810716705	1e-08	1e-08	0.09456254200780949	0.2231087331878811	1e-08
H3C12	1e-08	1e-08	0.0484171857478344	0.1910951267657817	1e-08	0.1492913495697397
ATRX	1.537235135550593	2.6441897877513822	2.3047645748803434	4.178753999828532	3.747130386074285	10.834757118221559
H4C12	0.5148394728034353	0.4497048253845433	0.2562232036216151	1.2008871520526645	0.4473704730330639	0.9875602924251521
H2BC13	0.276112637639869	0.4410155654103725	0.10993169063366409	0.5965896428297577	0.6032486831491142	0.3954620654456374
RSF1	1.6675951034675875	2.458046539705193	2.1720612090240383	3.3736701725635343	3.443671620443291	6.966200304566708
H4C9	0.31366951898131207	0.06262532973868949	0.5619807300151672	0.8009629175522943	0.6853026588419409	0.6417898157070258
H2BC17	0.5333053421866422	0.6920969589751108	0.3715785065315607	0.8904132307330644	1.5358943833924983	1.0366211030295707
H2BC15	0.6892627133150235	0.9632975942462264	0.503109850981188	2.391862135717829	1.8709613007078607	1.1752331874247655
SHPRH	0.5589430983713087	0.5128563351022065	0.4603717571869589	0.8197288177003881	0.7824972151501093	1.1713799638922255
BAZ1A	3.3424540837733665	4.178974271626639	3.5541218314423477	6.317210495240532	6.452489991176303	10.30004363648531
H4C8	0.5480396948851972	0.5470911284018039	1.2728153489748568	3.1696559321004	3.930703467071856	1.8688793708730256
KAT6B	2.0368282568665492	2.304779242419845	1.726294855605241	4.164361828107928	3.910462913079924	4.851666359275352
H2BC8	1.018624100515999	0.5592735709383584	1.2166671993443565	2.501040393028636	3.995751446257629	4.585187873431626
H3C8	0.502124183651536	0.5012550893600757	0.09995805025359379	1.4301312064406888	1.246632852697262	1.386964713099518
H3C10	1.5886134449930076	1.2789224347047194	1.2241774906366056	3.6237296316326018	2.595458807437856	3.2504144704264886
H2BC11	1.4528126190984438	1.81287254701894	1.3944146715376335	5.605456768462932	5.668024001463553	3.5033701119032266
H1-2	14.41171938421087	15.271068572764197	15.022968730137935	43.165014620623644	40.63552383289402	33.0426052243192
H2BC21	3.516314187211548	3.44315360548921	4.023850472150965	9.447522617298217	9.57521647170723	10.562809800564995
H2BC4	0.6364931092634805	1.3015276257893604	0.5517881695532268	3.428054206886571	3.77216916567686	4.127480936472212
H3C6	0.4243135339271646	0.1104989074944877	0.2019892943050399	1.277364701625492	1.3099433324715763	1.3777563329033564
