# Supplementary material for: Peptide-based Self-adaptive Implant Coating Sequentially Regulates Bone Regeneration to Enhance Interfacial Osseointegration
Source: Research Square preprint supplement (doi:10.21203/rs.3.rs-5132912/v1), 2024-10-01
Supplement: Supplementary file 633 [file 1597_transforming growth factor beta receptor signaling pathway(GO_0007179).heatmap-data.xls]

id	S1	S2	S3	C1	C2	C3
SPI1	0.2014344892390503	0.1367383739328423	0.1443586938214308	0.1028736024614237	0.07201513791718639	0.098915785942681
ONECUT1	0.2346322984967287	0.2685031903778052	0.3246798944266548	0.1629929037119903	0.18754492148224988	0.1697823177459785
SMAD9	0.3270767868026258	0.3041851554767439	0.3144263339495693	0.2278813121124329	0.1721246173796215	0.2116343226283646
ID1	200.3026746261259	191.71603928608482	208.0946440987877	148.3223374486323	148.80397222332556	121.68229677957137
BAMBI	0.5007582633683917	0.3822699983753717	1.0555001677576408	0.4050176909512489	0.2779010841473447	0.2109442879491217
GDF15	76.06348739735309	70.89863816680355	80.42557630004336	57.97018775292364	60.8761783577894	49.9057470430876
TGFBR3L	0.6931433990406616	0.7158038085487453	0.7612927234861041	0.516433646096393	0.4430770904703666	0.6683565466278477
TGFB3	0.3188906503728065	0.2292038690794753	0.27931937882130997	0.0939571480769016	0.2280141051518803	0.2348901483652961
NRROS	0.1461582201708696	0.1069971818696624	0.0581915451711062	0.0478485525391628	0.08708872689828759	0.029905004467803902
NDP	1e-08	1e-08	0.0144209489080228	1e-08	1e-08	1e-08
LTBP4	39.83760492068465	39.5222657967282	38.697061198928814	32.746738169518515	34.03367602434289	27.87312325522616
GCNT2	0.105158144089159	0.12206526891722179	0.141181908174361	0.0624474322895249	0.1311461767667064	0.08256175631350879
TP53	10.303805580047344	11.138647899132977	10.80181948196742	9.536819122527676	8.446788109913912	8.370375573457661
ARRB2	47.110800798084824	40.80269577618912	43.57922872417124	34.623052953503624	37.38433459697891	35.58048606504934
FUT8	2.2812630233134437	2.3902392196177047	2.2974675176606265	1.8384148026337128	1.7251985783387394	2.187776575106059
ACVR1	6.294953589399588	6.342351734888772	6.318004385006519	4.989531593361655	5.253991853563186	5.800741553554144
ITGB5	60.82205507644223	60.49901056104875	62.30227260391504	56.22014350949679	53.46909397880343	46.52119480330781
ITGB1	337.2789188970054	386.8464948052394	348.68269417592273	291.6110530987299	280.3792962268746	349.7521774433717
APPL2	3.0877907843843095	3.0036257817379024	2.6243512751724785	2.50639248352221	2.4811607098205077	2.671377409837276
DAB2	1.3928658880638047	1.2531261720347264	1.2722852708020143	1.0921228959672942	1.1555440161266	1.2138468326282548
ACVRL1	1e-08	0.028246149441331202	1e-08	1e-08	0.0112398171343393	1e-08
TGFB1	87.15533289851545	82.70741230820077	86.17122968678407	80.64914313061807	83.15792714650978	69.71721381065481
GDF9	0.16248278017951578	0.2400582880901907	0.10997472234581189	0.2361760207000893	0.0387263079109295	0.1263314427883114
PARP1	81.51527762457334	80.09920081822145	82.3640180270623	75.97534481468172	77.9363013762368	71.46689264135647
JUN	31.603883584212213	29.930884210821148	31.78426297363337	29.02627454680305	32.06126860670186	25.197432333622505
PXN	30.048483892381146	28.495280213758416	28.213797628245135	27.48144828820009	28.060959450406063	25.275335251542593
CHST11	1.6362412962864707	2.1624826560350905	1.8923993479947399	1.8424654762936918	1.8964483805451124	1.738479715416964
ZYX	142.4792217250713	141.30641664772767	137.60004883693728	139.72380904859847	142.97074782013695	123.70149957679355
TAB1	10.160556524853702	9.56041295190462	9.467933978472137	10.43107695912285	10.283497373130578	7.641726563014162
ZMIZ2	16.216854732370095	15.200212955503169	15.432790343275796	16.3635766318477	15.670458867311037	13.75077734431285
FOS	0.5681831053562628	1.0162327412349514	0.6715812158102672	0.8835424510159339	0.6582979917254592	0.6902595876304319
FLCN	6.539760534199863	6.291853865059529	6.129877545694942	6.311541497243629	6.757200462605738	5.875186941339573
CITED1	0.11924591498756029	0.0170056542792474	0.0169559566367245	1e-08	0.06766949180332059	0.08713768197868979
PML	6.976501179336762	7.185828981100742	6.476589847070201	6.726868447223956	7.750987054091022	6.483211694363988
CITED2	29.210108942277518	28.577524084998522	30.77662429933281	30.76847602481416	30.88995674537374	28.69003261126333
TGFBRAP1	6.907056646584658	7.024361742437023	6.29682201100179	7.477575773355509	7.057704814797591	6.138893009823943
FNTA	21.872492868549546	24.563964580497785	24.09066722792672	24.386809104352338	22.848902962990447	24.898248997295
SRC	18.695711869711882	16.67799092013365	17.95370442273358	18.263160123851442	19.61320624820945	16.818518503451376
GLG1	37.46664917251172	36.443397835810714	35.18376638110905	38.78282288930929	38.565888399228506	35.67122611487447
ADAM9	29.362107478094877	37.66457587562916	32.68711663019047	30.061581291671487	31.26849756118884	43.35544510665144
ZMIZ1	5.861760534875916	5.727497465935032	5.398794581000968	6.064800537437527	6.407736904164553	5.3581539142581756
DUSP22	2.6733301052597453	2.4395578317775386	2.619109636156883	2.8454851251096733	2.468593658647066	2.8179600416942585
GDF5	0.018910685028941603	0.0849507569348283	0.0094113972372404	0.09286324062270329	0.0469498877507852	0.0096731517185151
WFIKKN1	0.11343534963463839	0.1384032343415269	0.0376360332533774	0.0866504273188969	0.10013440513811199	0.14183685623089978
LPXN	1.156512361580989	0.7786234507683939	0.9235863948917372	0.9289231405993941	0.9971626835423802	1.1831526852942371
ZFYVE9	2.296102702786006	2.9657206120525563	2.333175714861235	2.704187301798058	2.7089645510945006	2.8626314141792255
PTK2	21.9501035605091	22.562381041377026	21.020071266552613	22.36366766048823	22.994142793551	26.4050943304218
FURIN	25.21694006250844	24.94660224969065	24.63189937467949	29.35117261804231	29.86234431478229	22.928988694520466
SIRT1	6.860024757265882	6.060557940991199	5.374513196585053	6.402180152016035	6.506980923628873	7.968286902586821
FERMT2	11.016491046079746	13.54318651753043	11.668099572549975	13.47901741763341	12.751245635416991	15.485206195726448
SMAD2	1.8601635844926252	2.168896349393302	1.9952557030693832	2.1582336445279933	2.162339940351922	2.6604636142200477
ENG	16.026312350791322	15.060928112813803	16.236672792547814	18.435217308738757	19.47903119339153	17.266301471139812
BMPR1A	5.427137944201436	5.692342468242158	5.342712504223132	5.640443337104625	5.965499127636972	7.605688155244454
TGFBR1	4.129424465427161	3.9615404518030752	3.718192542942115	4.045879355059814	4.068898510192364	5.843913028781373
CAV2	30.80337584024189	33.372097572690315	34.05731716173978	36.609166174867404	35.93224912636313	44.9161874633989
USP15	1.0010041213801761	1.3659397333631984	1.0833980723499017	1.066358455326465	1.3548409336400664	1.9283753790499198
STAT3	43.36917093877085	38.82163495603324	42.0722056659596	52.499067564016755	52.24474703750722	47.25033761233117
NLK	4.069182683402841	4.139047576441444	4.587050865101927	4.457309730197132	5.056533530966156	6.154811171744293
LTBP3	15.701764734387547	15.299055929395097	15.095339362710325	20.041856576571366	21.754772302951018	15.430828651379525
ITGA8	1e-08	1e-08	1e-08	0.0137455424226018	1e-08	1e-08
LEFTY1	1e-08	1e-08	1e-08	0.0150431680233825	1e-08	1e-08
MSTN	1e-08	1e-08	1e-08	1e-08	1e-08	0.0451916653504237
SKI	7.801922890431025	7.7569506864336315	7.200882883793474	9.734534872343398	10.138351772623762	9.061983871980125
SMAD1	4.720401388367642	5.583399932887001	4.709740846339979	5.882685998155451	6.173450652145099	7.08427886328492
SMAD5	4.698601840124588	5.040641896261707	4.146912569035677	5.5453942558545615	5.008365167764682	8.593751051800492
MAP3K7	8.901955876966003	9.67981053768756	8.28489056769084	10.629704469578995	9.989174323050761	16.06847530482123
PSG9	0.1356568305715662	0.1661997629782157	0.2700525317249853	0.4178638553269087	0.2571909521051682	0.2334055672178881
ONECUT2	0.1803528197462925	0.20878664465002408	0.15990367714455508	0.2217833768202391	0.2016824910005009	0.293040930657307
SMAD4	7.396085307442733	6.980816986631073	6.99715398875499	8.702713873033359	9.028236707259692	10.227058111232237
TGFBR2	16.847413554913302	17.209462274885926	17.155454080581727	22.055578108336988	22.31658485973228	22.947568161098342
APPL1	6.459204666676223	7.235755840543014	6.251042490742138	8.285220137069349	7.396126278492104	12.250586121980877
LRRC32	0.0351274557166659	0.0100190516829577	0.029969295492111102	0.054213575264199204	0.0598022157605005	0.025669015930454203
FOXH1	0.1358249723918086	0.1109371777869795	0.0614516559665128	0.2304131602104021	0.1471484220919009	0.1263215533146699
HIPK2	6.584990525599384	6.3966059688039705	5.9823259471419385	7.84722229795613	8.330965461252744	9.106680208230868
TGFBR3	0.9012430455970278	0.9412651357607843	0.8669008182811299	1.2644761361436556	1.090562078381172	1.297777647372752
SMAD3	49.588623326964644	49.49597172725412	49.963496402187616	69.68582699985492	67.20615614061401	66.85936212636764
COL3A1	1e-08	1e-08	1e-08	1e-08	0.0180205532416128	0.0046410036769706
USP9X	17.053792275413812	17.46321742576253	14.560525523345762	21.08869490052003	21.44744608688165	30.562359811029673
TWSG1	10.473533653649126	13.491915394076957	12.408018118236507	15.876284228296758	16.027110758225668	22.666167592931718
ITGB8	0.1942695810851496	0.1915091659052768	0.1450249357969457	0.4078285899307168	0.4823166168469907	1.0955795128643617
SMAD7	6.310524995205481	6.548359497808814	6.36163459349481	10.814598721936939	10.748038227354161	9.5012485876578
PTPRK	6.65883780642949	7.497481202740787	6.7194479202916275	11.019173305710932	11.027239129728752	12.795689040488265
HPGD	0.10353268026237669	0.1378046396697999	0.13740191660263049	0.2146620534061807	0.2170580776134688	0.20595080330944848
SKIL	2.9646860328038103	4.059007607342607	3.543736223987128	6.66323270404608	7.031695432166187	12.118294842356097
CDH5	0.0664949005689995	0.042241700182965504	0.0962702778947233	0.2256035653273695	0.2401281226127541	0.12986898112086098
TGFB2	0.1171623171853584	0.15037653380802268	0.1041229685974935	0.2013690577746947	0.2285493644944981	0.2739683464147196
LTBP2	19.59150009574872	19.754999421694595	19.191127384459268	36.662517221514186	39.01033177107937	35.86315757023523
ITGB6	0.0536637872314505	0.1392843345728837	0.2563888294739885	0.4005544801352133	0.5275988818621535	0.6752690899931001
SMAD6	0.4141591821723531	0.372391329248141	0.3537611695624299	0.7644706269000257	0.802173472643739	0.7482350337475719
NPNT	6.116920707695272	7.159149413623388	6.277441128682607	16.510488624844793	15.11327599963415	19.77148796792401
APOA1	1e-08	1e-08	1e-08	0.0187578128727147	0.0189671845391976	0.019539162827123403
