# Supplementary material for: Peptide-based Self-adaptive Implant Coating Sequentially Regulates Bone Regeneration to Enhance Interfacial Osseointegration
Source: Research Square preprint supplement (doi:10.21203/rs.3.rs-5132912/v1), 2024-10-01
Supplement: Supplementary file 637 [file 1598_embryonic limb morphogenesis(GO_0030326).heatmap-data.xls]

id	S1	S2	S3	C1	C2	C3
ACD	23.480125093170642	21.52236650186404	22.132707343900492	16.536122160704156	17.032559539942493	16.088132882508603
LEF1	0.42940275160545127	0.361681476745158	0.5609714255611171	0.4546745981668599	0.41310834166623067	0.288286734686394
FBXW4	9.251677260953818	8.407571883429533	8.441284167967284	8.808346708821489	8.05379528541672	7.867357206636485
SALL4	0.141987418857519	0.3217918686511277	0.22535995529901148	0.1846762152935259	0.2934447035488064	0.192368840360844
MYH3	0.1948268080165542	0.1499190650263381	0.1454409134198314	0.155467223639958	0.2257266973452357	0.11211449708236
NOTCH2	23.738712877898934	23.64698912249145	22.151597484528605	23.459682396279604	23.874753908499503	24.006614983419446
GDF5	0.018910685028941603	0.0849507569348283	0.0094113972372404	0.09286324062270329	0.0469498877507852	0.0096731517185151
WDR19	5.931973263628166	6.71275232530204	5.998826248297683	6.412369422243664	6.378648482906081	7.210407096474691
DKK1	1.0762426709546051	1.1294762752483654	1.8952709073069216	1.504199134104281	0.9728847122366047	2.2161837662278785
HOXA10	1.3231890957027488	0.9980124844189274	1.2389919170551713	1.0492558420016476	1.2264394611957194	1.6945928252027342
MEGF8	8.971922463140176	7.913862191381055	8.638629286070845	10.212787430220285	10.337885034142424	7.698394644040085
HOXC10	1.323412305737449	0.8555835786567121	1.2043527541080776	1.5720861527857024	1.0514111589501767	1.1862718148402533
CYP26B1	10.244091075772317	9.110946841149277	8.954396327090492	10.589153314723571	11.034012637864553	10.063425620041057
PSEN1	15.008003650956624	15.647810601252697	14.892723189316161	17.030420209600805	16.531690656813858	18.36753320893285
PBX2	19.5679454470628	20.71982656945339	19.2466745578812	23.482979982952063	23.224233226634464	23.79833718692532
PRRX1	1e-08	1e-08	1e-08	0.0056490111422678995	1e-08	1e-08
HOXA11	1e-08	1e-08	1e-08	1e-08	1e-08	0.0095463027263278
SKI	7.801922890431025	7.7569506864336315	7.200882883793474	9.734534872343398	10.138351772623762	9.061983871980125
MBNL1	6.962721163390056	7.385477717789288	6.5280095980965545	8.115435507314407	8.193571224452231	13.085745314450723
PTCH1	1.5009926290940556	1.7329917997940796	1.5141371424777335	2.020148387238264	2.1004144495757053	2.1921914551106383
FRAS1	0.019281195515156602	0.0059224139867221	0.0147627505805688	0.018936543724288903	0.023566656592771403	0.022760004598531003
DYNC2H1	0.4337837736011345	0.8660659206203295	0.7135905670064167	1.0196196040186178	1.0526298183284062	2.8390523007130066
SP9	0.0097515209683305	0.0194692754160217	0.0582371141101595	0.067040426845004	0.0968410264413221	0.06983297280578789
PBX1	0.0198992809841129	0.028378336602282502	0.0056590886400847	0.053046845289850604	0.039523436365436704	0.055256493328936104
TGFB2	0.1171623171853584	0.15037653380802268	0.1041229685974935	0.2013690577746947	0.2285493644944981	0.2739683464147196
SHH	12.53308040968817	12.772631780773779	12.47796249588121	26.17570058206072	26.2737364667873	25.017793756376577
HOXD10	3.8090549178883575	2.7578296365430983	3.5552583067059738	6.48160379121428	8.105837223154905	7.922059216748321
