# Supplementary material for: Peptide-based Self-adaptive Implant Coating Sequentially Regulates Bone Regeneration to Enhance Interfacial Osseointegration
Source: Research Square preprint supplement (doi:10.21203/rs.3.rs-5132912/v1), 2024-10-01
Supplement: Supplementary file 641 [file 1599_regulation of establishment of cell polarity(GO_2000114).heatmap-data.xls]

id	S1	S2	S3	C1	C2	C3
PTK2B	3.4187645831731635	3.2864455142846287	3.24775675003464	2.544546953934821	2.514912350934516	2.58577038421378
WDPCP	0.3035512755214034	0.3328574404065088	0.2723959274627773	0.2162566877671492	0.21710857888391538	0.33628814103207477
PLEKHG3	2.9646983610768167	3.058770317567583	2.9038162156721383	2.7513630288189006	2.706882142830986	2.6941087439873845
RACK1	1508.1942627033993	1513.5877270979815	1555.3948056312686	1431.0489721150475	1471.7770086565565	1336.8011007119826
KANK1	1.8431132297060215	1.618666529503562	1.528014327633953	1.3725194285167228	1.5500241651107307	1.7017860914354699
RAP1B	8.654644824298686	9.113249449846615	8.992176627682825	7.882363102338131	7.2756647795009854	9.750444488456159
GATA3	0.1933530510095613	0.0148475775940637	0.0666188054153542	0.0657335347877517	0.0886229861688158	0.0684716426005136
CYRIB	14.299953982291441	17.06623878371871	16.503728437098953	14.75146234292369	14.435960977957047	18.247713376240753
KIF20B	1.206407712544985	2.7521791173673655	2.343869399160189	2.1342366688516186	1.6780634282289517	5.597401536237389
RUFY3	0.9903081625199013	1.2579796387895916	0.9020847956393019	1.180129068010985	1.0567797054338668	1.401178763365438
RIPOR2	0.14010295613599438	0.1864806113308695	0.1285143401561757	0.242821071674587	0.155503225216135	0.2754188736756844
ROCK1	1.8482592380536147	3.066326868537223	2.438019574906414	3.5320430574667965	3.5269547497846845	7.425771680963821
ROCK2	1.2231395905113691	1.6409766072379994	1.5442063135622555	2.278364284409601	2.1347534672951083	4.883361221436711
RICTOR	1.7478791926919803	2.360534410853268	1.66843240403964	3.051238438325972	3.0802130254259947	7.105441445239216
KRIT1	4.04613877711509	5.142054876154668	4.0713193687832065	6.2114955404562	6.022377092986081	10.368448375827732
ARFGEF1	3.474294709097592	3.2437784230776496	3.1367245091086073	4.777068212585767	4.177556432679655	6.760592128177352
SHTN1	2.7842157046810385	3.12661654137812	2.679823707359984	4.3860735411638085	4.262321465025123	6.530896197090888
CDH5	0.0664949005689995	0.042241700182965504	0.0962702778947233	0.2256035653273695	0.2401281226127541	0.12986898112086098
