# Supplementary material for: Peptide-based Self-adaptive Implant Coating Sequentially Regulates Bone Regeneration to Enhance Interfacial Osseointegration
Source: Research Square preprint supplement (doi:10.21203/rs.3.rs-5132912/v1), 2024-10-01
Supplement: Supplementary file 645 [file 1600_post-embryonic development(GO_0009791).heatmap-data.xls]

id	S1	S2	S3	C1	C2	C3
ETNK2	17.129034025380633	15.548319285704537	16.96683296013151	13.985708761691663	12.88343321123426	10.725586578240705
BMP4	0.0100021622141028	1e-08	0.0497783111704643	1e-08	0.0099330202807685	1e-08
ALDH5A1	4.807649583518367	4.207827948922104	4.61748144240315	3.4490266126399662	3.7458592274286286	3.9672416938854904
CSRNP1	7.565756337889796	7.268675786850483	7.692392377277383	6.798558289802148	6.1008997675186585	6.236374706195821
EMX1	0.0349827223510387	0.0349221730343568	0.0533908388797171	0.020614447167729203	0.041689074592569104	0.0357885509962106
SERP1	27.089316712883164	26.853206601645212	29.957510673639607	23.41604439081934	23.25182287468629	25.23455079514255
PPP1R13L	46.24339161288308	44.94948902534961	47.02731800695548	41.15064727212787	42.48290068612468	36.1278016383967
IGF2R	20.826200939963734	21.00410290103404	22.111591485245167	20.156464493289562	19.56175722909845	16.958856309480733
TBCE	5.249984231020941	5.929675795898924	6.251327208669081	5.073607599584697	4.932583682137215	5.646929684593857
BCL2	0.5095479844046161	0.5086660407360614	0.4330164654046824	0.5169637537925491	0.3819061377608752	0.4548953224894085
GATA3	0.1933530510095613	0.0148475775940637	0.0666188054153542	0.0657335347877517	0.0886229861688158	0.0684716426005136
ACADM	11.05621545722232	13.311576721235195	12.1648766525318	9.848004678401837	10.468856831884544	14.039260237464411
ASL	38.259007589580285	38.87805202574468	38.23063569162516	40.029571411755484	37.68563568169001	31.536091695443197
SELENOP	0.0802289621821506	0.1716216294403572	0.022816019188118902	0.056282050832996	0.0113820604367757	0.152428780697375
ABL1	14.584829047290464	13.396667588871475	14.208540002768602	14.268143827747075	14.020548452181021	12.070752564586792
C12orf57	70.11643867305231	69.40711999872512	72.16340141289855	72.16853419758169	77.26338355948349	53.13875045000636
CHST11	1.6362412962864707	2.1624826560350905	1.8923993479947399	1.8424654762936918	1.8964483805451124	1.738479715416964
SZT2	3.5274781596510776	3.4805451664548372	3.3601221913279233	3.610030619549455	3.4150933195457687	3.41870869402064
SGPL1	18.356862413094092	17.787068308687623	17.936759600289204	18.22374571091537	18.938239269588184	18.24078153634287
INPPL1	22.81684965011699	22.110007100298372	23.431260076020518	24.78166189070489	25.067427982074676	20.37098108787693
MMUT	7.724794973611762	8.182105224500422	6.923857043084516	7.352007987810492	6.837548378427174	9.356416577889417
ITPR1	1.8902735241162059	2.0726907749728047	2.031605814815069	2.2292630273855587	2.00950974529335	1.9646748423514995
ERCC2	14.691787833378545	13.17979430983267	13.678313674303304	15.663838212000718	15.892256974248527	12.259311489954415
HEG1	5.593210054816195	5.480781377569169	5.2868291345731135	6.059845418051517	6.068307706748282	5.444953097341808
SCN9A	0.5194830472995292	0.6153531517357703	0.7224113316571107	0.5297263536413527	0.5134236312191264	1.045098984329324
ARID5B	0.078452381218636	0.12726445750152648	0.12038522818702929	0.06420837053555599	0.16231262057299958	0.1437983270130546
RAB3A	1.015526012540165	2.12725151256768	1.0108056470029192	1.929345360020299	1.5706240620827538	1.2262647029364722
NPPC	1e-08	0.0155050002938944	0.0154596881932592	0.030508491379507403	0.0154245161422598	1e-08
MTOR	17.43791000989527	16.22195775425965	16.96361593003945	19.06882769177519	18.02720080985493	18.310245752362093
GIGYF2	9.618150374327342	10.336027211125188	9.409662647484906	10.510374360402787	10.134382200761241	11.637404468986357
CCDC47	19.76342215650973	23.57899269118752	21.429989272026532	22.816801033752856	21.37410243518561	27.49210637745701
STK36	2.9507122394240857	2.9119684431993442	3.52152138174818	3.172164174820152	3.374881357695064	4.072512325808368
PSEN1	15.008003650956624	15.647810601252697	14.892723189316161	17.030420209600805	16.531690656813858	18.36753320893285
PLAGL2	9.075205961436025	9.130479909657225	9.077722104110595	10.427275189843565	11.060253969874127	9.896823137840823
SMAD2	1.8601635844926252	2.168896349393302	1.9952557030693832	2.1582336445279933	2.162339940351922	2.6604636142200477
BPNT2	9.242977240642924	8.793335239394196	8.527428172719379	9.616126373053294	9.480373572284854	11.755494371867972
ATN1	39.21513129022142	39.45926955451767	39.30247279609408	45.85067724619155	46.65215602606509	44.744226779720286
MECP2	10.503857455350214	9.539535622446351	9.74101005721799	11.69101144444234	12.108623045299696	11.077173299901354
TGFBR1	4.129424465427161	3.9615404518030752	3.718192542942115	4.045879355059814	4.068898510192364	5.843913028781373
KDM5B	8.237856199890283	8.465200201718805	7.6973189337305365	9.832954459788962	9.022129207733165	9.896842442085857
SLC4A10	1e-08	0.0070641531840488	0.0035217593937903998	0.0069499105387185	1e-08	0.0398166896636252
ACO1	13.287247726713405	13.546887317503332	13.510574496643844	16.78423902451291	16.94542668418456	15.422153897270206
SOD2	115.38548634731288	125.68919827917125	123.90428657898852	146.82083751710485	146.52084542594085	159.50624363011835
TIPARP	14.624326240969324	16.002436146119454	15.455100251283975	18.561220419933083	18.887580311480118	21.526820011181
NR4A2	0.5841042196887944	0.8851776714774593	0.7635110990463826	0.9468900827902652	1.0622904115443004	0.8711403574639276
ACVR2B	0.7622545204285048	0.818623409481289	0.7847321989507041	0.8972739818334524	1.0056699708280021	1.2752899989305255
LHX1	5.242850768673509	5.495102116787921	5.131626910399971	7.384473263776567	7.019172600463794	7.015109246564816
AGO2	5.509098756063461	5.148330792276103	4.880504810816714	6.769449882203014	7.036790536552233	7.998656114886553
ATF5	17.381489711990273	14.895763109293107	15.614574222812477	22.469024680023495	22.299248719475866	23.10076431830019
KMT2A	6.508592544477455	6.424373751239643	5.571312436959153	8.47222301064555	8.122453130877863	10.256315336445672
SCUBE1	1e-08	0.0025382695136559	1e-08	0.0224749027528515	0.0025250937773469	0.0104049330368836
ZFX	1.1720169047348792	1.2059879772249074	1.0723462474499568	1.611493888796616	1.5780002722058954	2.5755751009590484
ATM	2.0786793772681342	2.7189054171000557	1.927435990756992	3.9973209156385328	4.009834031715082	8.316080554921802
MORC3	2.9447322434288195	3.407068585347064	2.7342606373170226	4.573189184156665	4.706902285076784	7.504797994972254
PLEKHA1	1.2777445601792756	1.2258737572423912	0.9648178549085112	1.6541292864386106	1.6387171298180094	2.345358463303411
RC3H2	3.773609754911205	3.794948133666365	3.4596593664165853	5.033700655126782	5.39717375306675	7.190306037157844
IREB2	2.373799672752396	2.7305081653844794	2.4599989422108215	3.847236783231632	3.698580446227532	5.051838585156143
TAL2	0.1491338963060849	0.1860947101217047	0.18555086316535369	0.7689576056084152	0.37025742914840837	0.41956529166505707
ASH1L	3.0909418786956064	3.4884940843295866	2.58535678318561	5.488576770851834	5.4089603953336445	8.03719578912467
SEMA3C	12.484502758859104	14.979910012877165	13.976126517358395	34.514475292589346	34.10720801624778	52.94654874880874
PRDM1	0.1301777002562499	0.1447196993414977	0.1325174404146004	0.462006165430885	0.5259256469970717	0.6446945664313591
