# Supplementary material for: Peptide-based Self-adaptive Implant Coating Sequentially Regulates Bone Regeneration to Enhance Interfacial Osseointegration
Source: Research Square preprint supplement (doi:10.21203/rs.3.rs-5132912/v1), 2024-10-01
Supplement: Supplementary file 649 [file 1601_antibacterial humoral response(GO_0019731).heatmap-data.xls]

id	S1	S2	S3	C1	C2	C3
ANG	4.324677999237059	4.317192693509759	4.644858731571253	3.0218472922811332	3.1913800873049913	3.165208662621122
RNASE4	7.911500258894112	8.028890683616396	7.090520960290954	5.072584620949678	6.237633698001429	5.821225295156344
FAU	552.8399060086582	510.95367171981246	532.5353490100554	440.9115725053538	443.68224596485163	328.65967166105804
HLA-A	240.03249593185072	228.4411735012101	237.57636293007386	194.0082280020484	190.8887089759282	158.9826655049558
PI3	1e-08	0.0451220643307799	1e-08	1e-08	1e-08	1e-08
SLPI	4.345901582758528	4.213233979064151	5.739872442280192	3.693650589096989	4.398856945412836	3.9757586369310567
RPL39	1610.3549698401298	1593.0966048487976	1586.7247040995248	1421.826066744038	1391.527635486288	1461.9097952601353
HLA-E	122.16974108485519	116.181269573743	119.85280972443323	120.00254758268933	118.4223391828255	102.33971970072679
WFDC3	0.6720493801951987	0.927401471114451	0.668925561919288	0.6212108022798747	0.6085151398194636	0.9301877426842623
TF	0.0035202020866595	1e-08	0.0058397258970297	0.001152432847869	0.0034958680352103998	0.0036012898991616
PLA2G6	2.0693957297487207	1.8773537276359404	1.886321884499889	2.26060509976337	1.939717099259936	1.6045119464136695
H2BC10	1e-08	1e-08	0.257153474552814	0.2029890137014112	1e-08	0.0528611205530475
WFDC10B	0.11758905161055799	0.07043131860130239	0.07022548870507439	0.046194863533560004	0.0467104832750022	0.16841680603964349
H2BC6	0.26495063779910827	0.5818825021252282	0.10548764396975	0.7286009658388956	0.2104952916945845	0.1084215218577401
NCR3LG1	2.22332123470592	2.071112535541152	2.0147647196728666	2.0989218128629217	2.284699066416516	2.3718418913132546
H2BC7	0.1053080819370663	0.3679403134964445	0.6289114852530554	0.8791183484404674	0.3660303888452342	0.3232015569755043
CAMP	0.042141057399519705	0.042068118183180604	0.5033420198048988	0.45526553352998417	0.3766476587174672	0.25867062204638497
H2BC12L	1e-08	1e-08	1e-08	0.1571317548352466	1e-08	0.0545590148962932
WFDC2	134.01455089010136	124.57435230438085	117.3898762781888	211.25480902351012	212.52227330608792	198.66473267652768
H2BC8	1.018624100515999	0.5592735709383584	1.2166671993443565	2.501040393028636	3.995751446257629	4.585187873431626
H2BC11	1.4528126190984438	1.81287254701894	1.3944146715376335	5.605456768462932	5.668024001463553	3.5033701119032266
H2BC21	3.516314187211548	3.44315360548921	4.023850472150965	9.447522617298217	9.57521647170723	10.562809800564995
H2BC4	0.6364931092634805	1.3015276257893604	0.5517881695532268	3.428054206886571	3.77216916567686	4.127480936472212
H2BC12	29.790964962554984	26.544027725488142	25.544181408379497	101.56349981404948	102.94809262773136	102.54817066732927
