# Supplementary material for: Peptide-based Self-adaptive Implant Coating Sequentially Regulates Bone Regeneration to Enhance Interfacial Osseointegration
Source: Research Square preprint supplement (doi:10.21203/rs.3.rs-5132912/v1), 2024-10-01
Supplement: Supplementary file 653 [file 1602_cholesterol biosynthetic process(GO_0006695).heatmap-data.xls]

id	S1	S2	S3	C1	C2	C3
ACAA2	50.58528661798	56.938465568741144	57.43289734766913	47.36546523356449	43.66769941704761	46.42134099861891
CFTR	1e-08	0.016383701556019602	1e-08	1e-08	0.0040746715484536	1e-08
LBR	19.03313711518709	19.74060577936343	19.294363799639505	15.209562442847677	16.342960200995183	22.734893721817546
INSIG2	6.221262563154056	6.778156762396991	6.482084655703017	5.923896687603662	4.934538082777777	7.479581339028115
LIPA	26.241667900192695	28.060721759208132	29.339927372242183	28.075092558648073	26.890656662315315	26.85414080309225
PLPP6	3.275915698065872	3.7398193569045017	4.222173690053992	3.7040872109318745	3.812165402510944	3.557615149507432
PMVK	35.44298945645652	32.8391337150363	33.43982702205004	37.6545394272924	37.61144811856632	26.732123589351
ARV1	7.011105554319335	7.428452763828089	6.978516550289288	6.917080832866838	6.361320951038835	8.330004649434882
G6PD	97.47786032674816	91.75544460582813	92.28119874775257	100.26909186238008	102.28928893491731	91.6552405244549
CYP51A1	29.564241850956932	30.562525317615993	33.44675557209714	32.259501920283974	30.88457343956437	35.398323100207364
TM7SF2	14.583366124144076	14.211502701068628	15.033993319015806	16.694301921827382	15.924541663168252	13.86977725408283
NSDHL	16.47549463531996	17.481452516841824	17.013148194611677	18.010647761277045	20.293014631993692	16.974125200911974
FDPS	60.67931110379367	60.135022802826136	58.601549036693484	69.79360873406785	70.19391614199577	56.33001976605403
EBP	54.34902790084465	56.1334399371998	57.776280386125244	60.574264365210574	64.81196501105522	59.994682191440965
CYB5R3	98.51911434714975	91.11426081809755	92.8017067820458	105.5447469001511	111.46181981160255	95.76108672668194
ACLY	73.81937477093999	70.82057495466964	73.1932490716695	83.85194990727842	86.72093676377486	77.28180634133616
FDFT1	13.763175788438724	12.946129768238112	13.191605379467136	17.17453713281266	15.428802978970912	14.601925265897952
MVK	1.9637806371937618	1.5856028120573817	1.6154628831893425	2.0421296437122503	2.3574544142754457	1.9262922232239024
HMGCR	9.279629116810494	10.23478783860901	9.501940356803255	11.194543689439682	11.917839650262986	12.428807466862892
PRKAA2	0.6024071753949359	0.5355216795310187	0.7309078834362361	0.6283466651281637	0.6964944835273009	1.4417438693476938
MVD	40.384571025702314	37.97374566218153	38.7366150973658	50.9397892064889	52.49494577138415	41.728452800758284
HSD17B7	4.5579362946124835	4.408301237010708	4.607415995417647	6.010453488754076	5.104570595449916	5.7233453822395415
NPC1L1	1e-08	1e-08	1e-08	0.0045330298194996	1e-08	1e-08
IDI2	1e-08	1e-08	1e-08	0.0180384870988348	1e-08	1e-08
MSMO1	7.061170705707079	7.926197389430256	6.390343664369231	9.148450664364502	7.874786653636444	12.258291864351756
LSS	18.72616971037612	19.45181370106333	19.108439532882304	27.96493099152992	27.90247515678808	20.970206931787494
PRKAA1	12.26893654648324	14.397949852999803	12.624766207861057	15.26929548762509	16.035927266225933	21.879603658568612
HMGCS1	6.020016333857907	6.779564218695173	7.343216685328428	9.574995715100453	8.30312296739834	10.640602690067572
IDI1	3.245940339685257	3.960393738229792	3.443875813161056	5.095221048246382	5.470901009803949	6.426528117767623
CES1	1e-08	1e-08	1e-08	1e-08	0.012510478183669	0.0128877466143494
DHCR24	72.23907347162071	66.58713683999687	69.39095184162734	114.18793223497103	112.8097820634108	106.44863992093107
DHCR7	28.269972899209026	24.934290343757066	26.576312284305732	47.52060066572315	47.388121965563705	45.82723237258648
SREBF1	12.023439427506279	12.388747139602161	12.540341966117913	24.61305104943269	23.267004279090468	20.754813795517602
INSIG1	4.856423606967732	4.969218385300535	4.43908557534712	10.731633476729638	11.34174163832285	11.534716946688501
APOA1	1e-08	1e-08	1e-08	0.0187578128727147	0.0189671845391976	0.019539162827123403
