# Supplementary material for: Peptide-based Self-adaptive Implant Coating Sequentially Regulates Bone Regeneration to Enhance Interfacial Osseointegration
Source: Research Square preprint supplement (doi:10.21203/rs.3.rs-5132912/v1), 2024-10-01
Supplement: Supplementary file 657 [file 1_cytoplasmic translation(GO_0002181).heatmap-data.xls]

id	S1	S2	S3	C1	C2	C3
SARS1	203.86371677970718	203.00245709155033	205.2405287461571	122.06908255856695	121.630577868983	111.48516311676765
RPL26L1	20.57337062990481	23.57774983703852	22.313480701833242	16.863760119167683	17.790295122336076	14.260665282333353
RPS18	2939.0138233683697	3050.765872392649	2941.9242564167657	2442.007629866757	2451.6048053152244	1732.668579370226
RPSA	1887.0930684367208	1777.1666838693982	1874.2220822281788	1488.428117526128	1457.0528960748425	1193.6771953446587
RPL26	1000.098935336472	1034.0111571422542	1015.0022474466564	781.7785782349533	821.6947604394038	711.5815363153158
FAU	552.8399060086582	510.95367171981246	532.5353490100554	440.9115725053538	443.68224596485163	328.65967166105804
RPL35A	444.9744821947991	455.8205854328598	491.38945939494903	409.8011474859657	381.1023492719529	254.1691125028461
RPS15	1096.5985947192135	1042.3108866976677	1091.4634251280806	885.3609418539972	944.1035735222628	658.7096651675139
RPL24	795.1480603591147	892.5992414001828	930.6721855391178	732.0144141534827	737.0050624428751	581.5594369259356
RPS2	2908.5769644602947	2703.40814573526	2811.979393656592	2325.347298211641	2352.4802328514124	1925.7043023725523
RPL12	1746.3606313776543	1770.317825578628	1837.5970795272567	1435.5499204618302	1472.483387846823	1305.8216773388388
RPLP0	1659.8085657931358	1516.2772532900474	1565.1702789847207	1334.5387467215255	1369.4972090331985	1028.0634779977638
RPL37A	295.076895616937	311.40136742688975	303.9625115241484	266.7483450346286	264.06323537700786	189.185391803588
RPS14	349.3495682913157	366.2210762458837	356.97854594729324	301.5961308721416	288.75979695809485	260.3219770661293
RPS6	576.8437718053892	685.1193968656604	703.1082138607559	541.1076685565432	523.8414948210308	500.573170928596
RPL8	1975.0415218230348	1971.6462858038167	1992.1103067510167	1720.1217981298369	1778.9639873963438	1236.7819182614985
RPS12	1179.4643281440765	1390.9021262254064	1210.6981427211465	1032.3360913202582	1037.4174170082115	967.6975590450152
RPL36	396.0427981765342	383.9238445594786	397.4861394528692	323.62213630218395	361.98685891218736	264.33302708492647
RPL7	451.2568593370724	521.2668001479825	506.3348912854126	394.4169867486322	386.5067534836086	416.6672988948283
RPL36A	0.4909072178800825	0.5227280401973141	0.06515005988933309	0.1928529005073855	0.0325009240592821	0.2678481601873211
RPL10A	647.3099093447588	667.4127753756953	681.1683112328237	557.526751159356	540.5101937015827	523.2464332441033
RPL18	1064.5782153684731	1066.5635418603715	1100.341838059299	963.4950404964636	960.6711665541122	701.0108352739047
RPL10	673.099844007422	649.4385685763456	665.1187117590868	566.1418673969733	565.6965015968461	490.61719766735183
RPL23	275.4683648520426	288.71818361865724	289.4409541450515	247.5395014500441	236.34551804469385	218.03141324569478
RPL18A	1300.6961234852206	1240.7989172263956	1267.6319194505909	1126.6726955125612	1119.2746292437075	887.868719956636
RPL32	368.69382274405723	383.7942625430861	377.8943238087016	328.01316105843983	327.3442170552769	275.5341735660912
RPL27	877.3686797953015	939.9543918618268	965.266590362192	795.8415407401835	852.4529825995603	644.9644103181204
RPS4X	882.9405974247893	1005.2850850853604	991.684666763844	806.5219964322978	798.6607265574993	771.3032062121655
RPL11	777.3859522709358	872.0363423490418	932.340428878032	757.6562618916063	713.0220191158662	661.5280388967213
RPL37	150.23130927689033	157.46640062676516	153.46437939807714	134.6908431928843	140.64575932338064	107.20851667532665
RPL21	807.1800454810306	862.2720945484785	861.0661090270357	697.676792109908	681.4301275233901	720.2559798423372
RPL28	196.0187764002504	192.63459768909905	190.8865315817496	173.4986267757269	185.0671878501004	118.27117428113685
RPL7A	1985.746110636384	1955.79311286734	2008.6278569935155	1778.5608154761892	1724.7709287396242	1455.5520738330217
RPL9	438.582807483606	453.9475115536814	473.1383504725754	398.3514205594696	396.82477429918106	344.4583392810293
RPS3A	398.1563752807231	431.9025892160423	435.1922923424055	351.71143721704027	336.3890728099495	370.042454535637
RPS20	297.0031915623664	330.124774422599	322.84361733985946	279.9909387538041	282.0251722462869	234.77223958878452
RPL3	1280.7619306791005	1308.8172363921924	1312.318259252441	1168.2753311509273	1153.5860141918088	960.812029304133
RPL5	1061.5788144426117	1240.4038689855738	1222.237909565295	983.2133746398064	946.5259222519568	1035.7929956140872
RPS19	310.40336481947264	311.042641255122	316.5174644885449	287.62689212103203	288.26058598925187	213.9642456520161
FTSJ1	39.56290531531428	40.93161824097474	39.83034446134555	36.23935797508662	33.90823175534839	31.242865254431806
RPL13	447.3742367219069	438.31950256548583	455.0826035566913	402.21098507244415	412.44147524710337	315.1941363354265
RPL6	186.7616594638392	219.01568711593205	220.59898594089424	178.8355049508524	168.4286092551591	180.63857888129172
RPL35	1708.5517085912093	1641.458677624742	1755.454257099344	1458.7896814698736	1413.6225113097848	1434.380621297683
RPL22	298.6226258868205	321.36360582366314	332.0434408114053	277.9986113324522	275.35331054938064	253.94990476337162
RPL41	2225.4190914719375	2248.084540844138	2301.1417337680027	1998.0634031449522	2060.7947368740206	1699.8223585439819
RPS8	1265.595589449008	1338.6948533028756	1361.993823658698	1167.1087588096873	1112.6758945716695	1095.5993773324635
RPS13	577.643649378727	655.0519319549082	636.2505658782869	578.086297832922	526.0145280457991	492.27275319376616
RPS9	634.5940465475151	582.993504704871	613.8104158789223	562.9665656029438	564.927120833178	438.8866892332903
RPS21	234.42616038585084	258.7637010834403	237.54717392978696	214.6409610195732	229.802747397698	181.72113295996084
RPS5	1068.6785360168044	989.0881576739692	964.2516428829756	903.3429791905464	899.9078091162131	790.2633301735809
RPS3	642.5839570971215	641.7740545046755	618.9634621509825	581.8799834440064	553.7993969748265	498.16528730789736
RPL34	101.4937261683842	108.15176939600072	99.58544803837289	91.19412132401841	91.55349695362594	82.94160754818873
RPS15A	202.27266613014288	209.05508619578106	209.8957315410353	189.78564247587425	183.12444550121344	161.3519293349764
RPL29	736.9151889437987	718.4773346493572	740.7972418401507	672.3810030970515	651.0690733415196	567.669548950683
RPL19	984.9838272926588	1035.311652920721	1076.736343431338	920.2735316660968	904.6532586697124	841.957747384206
RPL4	670.0731870881708	688.4694076955118	714.7922511730103	607.0781617768	590.1136540745152	591.1122235518476
RPS17	1964.2060498825458	2007.3721076751035	2076.6364795603986	1816.8697160824079	1888.6430344472383	1521.2249074474428
RPL14	75.82941919133062	82.39453420851552	75.53600499374265	69.39409218799554	67.76327175303132	65.23295125518136
RPL22L1	5.971000909043628	5.777663183410519	7.011988213362512	6.224355779649691	5.214517063230592	4.809138205519581
RPL30	1121.8914031048498	1190.692186114006	1149.6298655418748	1020.8930446947932	1066.5569789075225	911.3111099786056
UBA52	121.7287111574003	121.45179972284271	124.73427423723084	104.87670169138578	112.95225235742936	106.77760022790191
DRG2	23.56439500380988	22.744762060352166	22.5569531251223	22.376929512746692	22.263507942829204	16.237753305698845
RPL17	32.67298216482981	32.616430610919856	31.413444395826463	28.24177483596776	27.031901902507624	30.76157614239912
RPS7	538.1530922374027	627.6699669254101	621.2976655975999	564.2548007456487	507.63870312623493	521.8681365011582
RPL39	1610.3549698401298	1593.0966048487976	1586.7247040995248	1421.826066744038	1391.527635486288	1461.9097952601353
RPL38	314.3513087065547	336.78037339985923	332.18055938074286	288.4805261855938	286.7970637387619	303.41215619547364
RPL27A	244.7040765053541	240.695106737574	253.83778959842812	235.8208972514309	235.6934467600104	194.25321644508722
RPS25	1284.3533795104097	1401.911866436572	1435.7434825719051	1219.0080147628962	1191.136361978909	1320.1104731909259
RPL31	223.94213277384304	232.5421865653912	222.37215927464652	197.21548720543706	204.65211237583696	212.8766191573221
RPL15	173.55391299647192	167.95507020433004	175.1331793231044	162.56235303004655	157.48053448104605	148.060480459369
RPL13A	2239.869098051186	2248.3682279068244	2319.465746151882	2154.535551821368	2194.6047559207086	1822.3289533633047
DRG1	34.49354828882637	34.06053854850361	37.44494227244536	33.58315912507619	32.72506301591438	31.018645695210328
RACK1	1508.1942627033993	1513.5877270979815	1555.3948056312686	1431.0489721150475	1471.7770086565565	1336.8011007119826
RPS24	263.69241649150644	277.5772507868852	281.2231015128385	248.68852543257	254.2513099094724	270.9905880278701
RPS16	1300.22440402533	1337.732985390323	1343.0086922070786	1191.0690147368612	1188.4879637437186	1370.4292422761566
RPS27A	426.96841843667727	512.1623898969508	508.61486055533896	429.4539624940777	424.1293350882559	520.7918900674688
RPLP1	715.169900393452	767.2355412355148	775.6355671084198	736.6387950623724	788.3653428672684	625.2134793076809
RPS27	998.2613763439446	982.7826814287608	1027.919191601943	958.5121637765568	994.6217442654536	915.3699639954496
RPS11	2005.3812463401127	1894.6077326396367	2006.3131255886772	2023.791333371021	2069.6030181438637	1631.1041990011363
RPL23A	906.323987436792	1013.3033691317452	1016.117790483976	911.7845419669004	963.6256990633034	983.1500621965856
RPS28	95.82009179204174	112.21661532832125	103.44529820928307	104.25919682878775	113.2148081358677	90.34528176297671
RWDD1	4.310968497431165	4.732090257686901	5.41873123426804	4.199134361849188	4.083372803953547	6.149023837823102
RPS26	143.1839675292662	147.75592708733316	153.34755857785015	139.42299720231438	142.64979041716882	162.3731023406344
RPS23	232.0441183182433	239.9299054576137	250.86123875015028	233.97375832668084	223.99817860320306	265.2971374818666
RPLP2	1075.6204077777645	1136.0219445434273	1254.5573526376636	1228.356101574094	1096.5585399594493	1190.5116157484488
RPS29	26.768594527443266	28.98488713751053	28.817239482081572	29.12829720883385	30.82050111055507	27.78417325343731
ZC3H15	21.37536944254209	27.30092305329847	23.87776488611498	24.40019414448004	24.07817228280072	40.71150669153092
RPS10	1.6019223737077155	2.413810877598034	2.0758276614799724	2.820044451592118	3.421825614731747	2.84474890121886
