# Supplementary material for: Peptide-based Self-adaptive Implant Coating Sequentially Regulates Bone Regeneration to Enhance Interfacial Osseointegration
Source: Research Square preprint supplement (doi:10.21203/rs.3.rs-5132912/v1), 2024-10-01
Supplement: Supplementary file 661 [file 2_intrinsic apoptotic signaling pathway in response to endo...(GO_0070059).heatmap-data.xls]

id	S1	S2	S3	C1	C2	C3
CHAC1	2.8751129893138563	2.6984190657361347	3.2001038213089363	0.390172180656791	0.5287478192229532	0.20111736796009008
TRIB3	48.48802409900728	44.50729557465153	46.48851644617983	18.210473520654183	18.67003852733614	12.500248960502566
DDIT3	23.82711342916973	28.956714489243108	27.735725705628774	10.652011680040998	8.146417575752215	11.138975793177417
ATF4	88.59865210318637	90.22393941736252	94.15933392013181	44.35863505661207	46.15516893582139	44.00387387583949
PPP1R15A	57.84402107110133	53.76594228237109	57.1004562778257	33.23461218133705	30.51129109163003	26.465691054474362
ATP2A3	1.7262281972320415	1.489125318933125	1.8827539833841462	1.0459198093281192	1.1759531196830832	0.8849625662639716
BBC3	10.366750878675045	9.07221062815539	9.442164384796548	6.29005341573159	6.651730644610119	5.02932531698688
CEBPB	47.979441638209124	45.926759516544344	47.13315593192989	33.232419860759705	33.849748256415076	27.811815102217786
ERN1	1.2707515573334494	1.2890862120727504	1.2079723331086776	0.8484854766050826	0.8647653145115457	0.8440799364431845
ERN2	1e-08	1e-08	0.0064539527187949	1e-08	1e-08	1e-08
TP53	10.303805580047344	11.138647899132977	10.80181948196742	9.536819122527676	8.446788109913912	8.370375573457661
ERO1A	28.226984841001602	30.370518886400728	29.116208090893142	23.29668328277359	22.09064415834852	28.835242601056596
CASP4	33.905058246160884	43.23503473305509	44.436397630857286	36.74830352212235	34.77738826258425	31.784041859008013
SELENOK	17.31895707924111	17.17272446029565	18.165787985438694	15.636865356253308	15.960098172153518	13.922423005600121
TNFRSF10B	36.454767629998976	36.92025757517612	35.690070786768906	31.055489761375153	31.692886716918306	31.743665438314103
ATP2A1	0.7798293049099849	0.9047194739710882	0.594390838926871	0.758989923698789	0.5790847024475136	0.6324843161263937
DAB2IP	3.244018891025953	3.298412792887893	3.1876756407588016	3.11070723576102	3.0116242431671507	2.3093376052620522
BAK1	14.298122242214895	14.003250122730392	13.445203526144414	12.820065627079616	14.027301295025358	10.220412017606744
BCL2	0.5095479844046161	0.5086660407360614	0.4330164654046824	0.5169637537925491	0.3819061377608752	0.4548953224894085
TMEM117	0.23815615240302349	0.2377439433226809	0.20113261838045648	0.1488448879676677	0.1863410953598828	0.2953237455730968
TRAF2	10.914081781970024	10.519495051475237	10.385921755720965	12.168484079442276	11.696053395536424	8.394876892567302
PML	6.976501179336762	7.185828981100742	6.476589847070201	6.726868447223956	7.750987054091022	6.483211694363988
BAX	48.73750489134432	43.58546629771119	48.7992144304932	50.677065612937604	50.63368976933464	42.88916215791117
ITPR1	1.8902735241162059	2.0726907749728047	2.031605814815069	2.2292630273855587	2.00950974529335	1.9646748423514995
BAG6	62.85520315067818	58.26734964626117	59.930778225150526	65.9437367207059	67.1175025634111	59.08465754668061
AIFM1	21.435067414991828	21.769970611294777	22.811372029169267	23.84257078811868	24.478770592040505	22.39742392151009
BRSK2	2.841055778903624	2.8402309307842413	3.0441213451830262	3.5029386442448485	3.4606117399171406	2.776483071680433
APAF1	6.034861658459224	5.8925910044369605	5.527054235771885	5.829718269934263	6.081664622454385	7.5754932506911565
QRICH1	25.47956415871121	24.35832994096439	24.14269047623613	29.479871359941082	28.818841297135506	27.622213734658843
DNAJC10	5.42022905653998	6.4883269772814485	5.678077186184488	6.510894472895133	5.991759070944935	9.843030601743417
MAP3K5	3.5900969968122847	4.071231252879688	3.719186682644271	4.731966906221915	5.079404775680462	5.48998342443109
