# Supplementary material for: Peptide-based Self-adaptive Implant Coating Sequentially Regulates Bone Regeneration to Enhance Interfacial Osseointegration
Source: Research Square preprint supplement (doi:10.21203/rs.3.rs-5132912/v1), 2024-10-01
Supplement: Supplementary file 665 [file 3_brown fat cell differentiation(GO_0050873).heatmap-data.xls]

id	S1	S2	S3	C1	C2	C3
RGS2	3.713632919225781	4.500288936147907	4.211288602049035	2.03229941204321	1.449497378197315	1.6444197503052644
PLAC8	0.07427784779635	0.0667343575771958	0.0517528158097938	0.0218850457405488	0.022129323091959703	0.0379944258761839
LRG1	0.2198937747991064	0.1717929216516988	0.06661312243003409	0.028169117423439603	0.018989027734444202	0.029342492095856702
METRNL	9.677407962274525	8.671205099202027	8.197427253257098	5.539822555661564	5.404793838460442	4.784236512796408
ADRB2	2.59817457172598	2.568975868292115	3.201835298401256	1.8226658032950867	1.4866948274330627	1.79733028853591
CEBPB	47.979441638209124	45.926759516544344	47.13315593192989	33.232419860759705	33.849748256415076	27.811815102217786
GATA2	1.7667115546043242	1.6122953314355846	1.646952918868636	1.1718612236658632	1.3551539245094049	0.8430073977239586
PRDM16	0.3980047125549723	0.3830238958885728	0.4474553164283661	0.3430836319147445	0.2502323867213157	0.2636370502151302
NUDT7	6.035347746307296	6.635018164768707	7.223961446732115	4.4268414879606865	5.1211371355833535	4.396309396102766
CEBPA	1.6565708299526156	1.597005170481907	1.8655794887580652	1.0319572198092843	1.3630989692822058	1.2202056223556381
ZNF516	2.012652485391392	1.8053401857346527	1.7153837825814857	1.3297206273075517	1.3711160650748164	1.3776494955318348
PTGS2	1.104450520559476	1.2789451206900802	1.0993168163366414	0.8243784117283924	0.7677710485534179	1.0112529803538441
DHRS7B	4.336156203276762	4.178697762053306	4.525321951388271	3.147268197666433	3.0829475917150146	3.585713460059962
SH2B2	4.099136406173736	3.5960364496585173	3.6576499950068158	2.6839094803862413	2.7138668587805537	3.356966147091583
PPARGC1A	1e-08	0.032094139005498803	0.051200548346763304	0.016840061597948403	0.0085140188120873	0.0065780793510935
BNIP3	107.93937373545748	112.52506892255303	111.27987650129268	89.75075866407362	89.38916931859958	89.75501188849701
PEX11A	3.4120709826241153	4.21409662696574	3.9180008315204797	3.441405716954817	2.9683488171314423	3.1519510886560522
SLC2A4	0.1697254195708658	0.19889802549007798	0.1983167618631301	0.1956814095681605	0.1099253237738386	0.15853635400531768
ERO1A	28.226984841001602	30.370518886400728	29.116208090893142	23.29668328277359	22.09064415834852	28.835242601056596
ADRB1	0.3360051826020939	0.1718023432219331	0.3507576741211992	0.2897552907031005	0.2522965100238644	0.11737637525566459
ALDH6A1	4.538309874612282	4.185698247091197	4.261606655592152	4.065824645471778	3.9045471552467466	3.8909348528733694
LAMB3	170.87538243582406	169.38369170990205	173.08956576344465	168.9112169364439	169.41038345829807	134.45655037045503
ARL4A	5.194781163890901	5.161173761784616	5.546978465577649	4.9889069791882505	4.097710964044577	5.726480752624897
MB	5.048006708067222	3.967380638126557	5.801819878336253	7.2449230483228515	6.896490160256783	4.907500020402972
SLC39A13	19.75280769941904	21.26741486301695	20.928919520145904	33.35405496098277	30.95298610895637	26.414679621846208
