# Supplementary material for: Peptide-based Self-adaptive Implant Coating Sequentially Regulates Bone Regeneration to Enhance Interfacial Osseointegration
Source: Research Square preprint supplement (doi:10.21203/rs.3.rs-5132912/v1), 2024-10-01
Supplement: Supplementary file 669 [file 4_negative regulation of blood pressure(GO_0045776).heatmap-data.xls]

id	S1	S2	S3	C1	C2	C3
ADM2	2.7485382305328874	2.430537471804208	2.4118667134217584	0.81039311367122	0.7328781810423326	0.6776977007766816
NOS3	0.38159880015441777	0.3134302613298843	0.2355876952524577	0.08539239732124919	0.1295182957207271	0.049416331347108
PTAFR	0.2906317298482241	0.2723657135170156	0.3778361650142989	0.13398048719896669	0.16492724905100808	0.103154079986109
APLN	2.3561211325187457	2.2517920588175704	1.8992027748182823	1.2290782796201147	0.9742915239849372	0.9799636748680355
NOS2	0.0059213982579924	1e-08	0.0058938744752475	1e-08	1e-08	1e-08
ABAT	0.1713390892057133	0.14253544288601	0.1339978153129257	0.10817768789394619	0.0891286427895988	0.050081691152961
GCH1	4.647535211253707	4.762092387098286	4.542292600688096	3.1487793438245397	3.0747990476266422	3.4254219249864266
CNR1	1e-08	1e-08	0.0036633163370609	1e-08	1e-08	1e-08
ABCC9	0.0026503621350554	1e-08	1e-08	1e-08	1e-08	1e-08
SNX5	62.56660246883651	68.84114356012203	68.84115784117304	52.69229486381426	50.21652230072505	59.53457173897566
OPRL1	1.566257984227789	1.427586437361671	1.318660987464263	1.4896204081543414	1.3156609242953836	0.950002071393323
SCPEP1	22.820198960135574	25.56041190702836	24.699356261284276	22.437726793556628	23.151197138655558	22.76287935598305
MKKS	7.375652621704908	8.345796196194154	8.08263358579031	8.080719105163041	7.449115130779639	7.421012949992616
RNLS	0.1108036273252328	0.1375174258682076	0.1192309075308904	0.1220582388534639	0.1204466428099686	0.11412191337578209
UCN	0.751859904735583	0.6880120132675654	0.4989100775802015	0.4615127448305672	1.0266609593971716	0.4166386499061585
VEGFC	5.413249799924767	4.941633971655878	5.311272027582724	6.301824630886976	5.857574000936617	5.030393395484612
PPARA	2.991025324125015	2.880154605042756	2.7861123795234266	3.5289721990945604	3.441311699505588	3.4367727671910786
