# Supplementary material for: Peptide-based Self-adaptive Implant Coating Sequentially Regulates Bone Regeneration to Enhance Interfacial Osseointegration
Source: Research Square preprint supplement (doi:10.21203/rs.3.rs-5132912/v1), 2024-10-01
Supplement: Supplementary file 673 [file 5_ribosomal large subunit biogenesis(GO_0042273).heatmap-data.xls]

id	S1	S2	S3	C1	C2	C3
RSL24D1	56.139237001979204	67.37420205431638	66.83610490934632	38.5484070053953	35.364934532607755	43.79591981703509
SPATA5L1	3.2070168386334945	3.3495106914015738	3.5611400462471265	2.1392412129455582	2.1170952789974495	2.6266089844620732
EBNA1BP2	77.49176566043275	78.281268286774	84.7858464216427	63.02740573266193	59.58862472991092	48.8322697949162
RPL26L1	20.57337062990481	23.57774983703852	22.313480701833242	16.863760119167683	17.790295122336076	14.260665282333353
RPL26	1000.098935336472	1034.0111571422542	1015.0022474466564	781.7785782349533	821.6947604394038	711.5815363153158
RPL35A	444.9744821947991	455.8205854328598	491.38945939494903	409.8011474859657	381.1023492719529	254.1691125028461
ZNF622	33.061244019209894	36.03351570437998	35.478018815040045	28.93092749448419	28.558364700013513	25.31486689109016
NPM1	387.76770918331033	458.609924909891	453.78220794589606	321.46852618017977	325.72979740201737	395.2191652461745
RPL7	451.2568593370724	521.2668001479825	506.3348912854126	394.4169867486322	386.5067534836086	416.6672988948283
NOC2L	67.17310469680882	62.18719237577702	64.32526491881539	56.84306888165417	55.18992359569001	45.727372356007635
MRTO4	25.26260802535352	21.64238653156381	25.856359307728802	21.442751735220046	19.482459822088725	19.109291474926692
RPL11	777.3859522709358	872.0363423490418	932.340428878032	757.6562618916063	713.0220191158662	661.5280388967213
PES1	51.011715637357646	48.47307761469651	52.24923928122594	44.004207735838975	45.8795990270113	35.568438329793146
MALSU1	7.777753323066182	8.943202080699294	7.7490878300822885	6.700507009710117	7.006867262180197	6.802623046341567
RPL5	1061.5788144426117	1240.4038689855738	1222.237909565295	983.2133746398064	946.5259222519568	1035.7929956140872
CINP	23.886147059305557	24.8100751321228	25.517934634571176	22.509520920450782	21.515025352775698	18.5010558948958
C1orf109	6.617170613593099	5.462161420238885	5.714484337224934	4.996599599893168	5.065754628108511	5.122007065714477
WDR12	5.5132587107220505	6.2124814060708555	5.933156428066812	5.20854990554567	4.8773567524628	5.074968012666863
GTPBP4	21.62090596552757	23.84416309124701	22.717721165257764	18.46070323469469	18.72908512768248	21.74441006556827
RPL14	75.82941919133062	82.39453420851552	75.53600499374265	69.39409218799554	67.76327175303132	65.23295125518136
NVL	5.568355247288097	5.5432621491246366	5.8455362620783795	5.0785527028951725	4.755989549158205	5.105314237540852
NIP7	28.0564020126102	30.35493436916093	30.99000825430543	27.25732391578392	26.333932842535642	25.45425816247007
GTF3A	66.00006436631065	66.35102718015682	68.71682324739781	58.345060414851744	58.46495509563879	62.11733646055404
TMA16	8.202107952569996	9.609423857290789	9.850639128415914	8.2792587681726	8.060561182953002	9.235975454073586
LTO1	5.422052012453062	6.06298780612612	5.865706755247509	5.69917155677892	5.49405392175483	5.024039080591055
RPF2	4.294221243586272	5.4145956133605635	4.9567998901267565	4.300265476700435	3.857061205889766	5.640928296193661
RRS1	12.467159376449438	13.197230252909973	13.691926919155057	13.254001783075989	13.25814323231559	10.976732549155566
SURF6	10.181879502741292	8.973636589966363	9.871392943031484	9.711364585171447	9.201285563149865	9.027964397927937
SPATA5	0.2173049762487215	0.2610499785706066	0.28778219391851	0.2342201117087842	0.2075730431632211	0.3165100135598624
NOP16	26.954379745057178	27.78435795248029	27.945957575433738	28.580792086985245	29.28739812883295	25.47905529656892
WDR74	12.537053989101528	11.128062554607295	10.828774424208381	12.595673995754455	11.356174314575117	11.414291816338569
PAK1IP1	7.566185026642891	10.335143726288234	10.606180726730694	9.585911609098497	8.252747301046032	11.610708748183308
HEATR3	4.889973799836138	5.069662481762027	4.684852856461896	5.2704812628212245	5.162931107313408	5.131161448833935
SDAD1	6.851933963529271	7.785706797012563	6.560795881858701	7.907885412516787	7.823685971304423	11.168790330546697
