# Supplementary material for: Peptide-based Self-adaptive Implant Coating Sequentially Regulates Bone Regeneration to Enhance Interfacial Osseointegration
Source: Research Square preprint supplement (doi:10.21203/rs.3.rs-5132912/v1), 2024-10-01
Supplement: Supplementary file 677 [file 6_cellular response to glucose starvation(GO_0042149).heatmap-data.xls]

id	S1	S2	S3	C1	C2	C3
SESN2	15.560453951470336	14.104408676324132	15.674298458454357	4.041369180746238	4.115055083682692	3.179362194805828
ASNS	1.0784875639239917	1.1535223701728927	1.433855275945149	0.3480260067574769	0.3519106185862138	0.2285470571111966
SLC7A5	217.42294875570028	201.2007622783712	208.48482797382772	75.77822369666372	77.47675827043643	72.20173588170462
UPP1	51.407481270212344	50.59395815506146	53.211967776772426	21.18116732378923	20.593834813591737	16.51577398218477
PLIN2	55.69843229415764	60.607191352864774	61.9631123382883	25.747552584757962	25.30813392786501	28.38456160117765
ATF4	88.59865210318637	90.22393941736252	94.15933392013181	44.35863505661207	46.15516893582139	44.00387387583949
TSSK6	1.2733567114224815	1.0655250929825608	1.2301603129103935	0.735644369278799	0.8182410674142873	0.7088158337616919
TSSK3	0.0463787046240524	0.1388952722137416	0.2077340377895916	0.056937102518668604	0.011514533090835	0.0118617675822015
XBP1	75.6685300555349	78.62125044822915	83.88747360171679	53.546925628264084	59.66643776538122	53.14391067490551
HNRNPA1	355.6397459817497	399.48273291104545	400.39431820802366	267.27836999307345	257.49872630750326	289.16413948158123
PMAIP1	9.269155518412592	10.17783807901029	11.64200565874484	6.748428690964104	7.05082389665882	9.110801559034417
BHLHA15	0.9314695990865036	0.8841266882974038	0.8663438830992042	0.8098402595923259	0.5307552803672464	0.6248695449250503
TSSK1B	1e-08	1e-08	0.0101721864394301	1e-08	1e-08	1e-08
SUV39H1	17.13364745157076	14.45006457675215	16.493927637123463	14.088227819446395	13.516602320059182	10.728901482995298
TP53	10.303805580047344	11.138647899132977	10.80181948196742	9.536819122527676	8.446788109913912	8.370375573457661
ZC3H12A	63.286296216543455	58.603879574040846	60.76106554735098	54.913092763815044	54.77519497789426	44.97053259079414
TBL2	11.354211446264147	10.955561432319337	11.895982000570381	10.012762680992767	10.602095440595683	8.62248518319863
YWHAZ	193.43223345350532	202.47070461398417	203.5340754114601	167.10066752627444	159.53184558105545	194.11397582036412
HSPA5	278.9832131122925	302.36074563115443	307.66029380990756	261.20796872710076	262.357325018502	259.00132253284215
PLIN3	97.05502361935687	88.80012206907827	93.92723850162699	93.59962107360096	92.90462003821196	68.6633143239391
SESN3	0.0124826478373677	1e-08	0.0124246260700136	0.0024519120595449	0.0049585496148984	0.0102161508526739
BECN1	36.790253673908246	40.86478152364872	36.125428691575046	34.281059717436705	35.5067522578644	34.88566534924643
RRP8	1.5883634664823871	1.556417407635773	1.560826297811672	1.4207671726279043	1.4433283168678805	1.4914569048235466
BCL2	0.5095479844046161	0.5086660407360614	0.4330164654046824	0.5169637537925491	0.3819061377608752	0.4548953224894085
MYBBP1A	24.305755282375802	22.65844103923738	24.073413996011936	23.143212155249447	25.399026876062898	17.78905371193803
IFI16	0.1546625706761072	0.3087897404842197	0.21458814007395519	0.10586828695868669	0.12101301067311919	0.3739868960279217
NUAK2	22.702602591143002	22.876109138227584	23.10630629876056	23.113295137309112	22.70091020753173	21.153794841359648
KICS2	1.2869581540547663	1.1671144567894858	1.0644731140688388	1.2773053610749194	0.9855476512310583	1.2795158868364302
SZT2	3.5274781596510776	3.4805451664548372	3.3601221913279233	3.610030619549455	3.4150933195457687	3.41870869402064
PIK3C3	4.75328840799294	5.16038389486995	4.946013175724077	4.499773266931233	4.702354278739404	5.9667489145493935
YWHAG	116.00990172345723	115.97686916367807	118.52838257596996	118.09544115288983	120.10786916499416	123.05592856542896
ATG14	4.947739671744119	4.419262692103887	4.872902214917982	4.838838466489958	5.022152441354953	5.205570276620208
KAT5	16.000709089763667	15.89867200853945	17.419428502890277	18.588061192814905	19.091364575398728	15.1720645420278
SH3GLB1	9.329345990924573	10.52366718869788	10.331050107057314	10.179876935724744	9.78795591210489	12.813668268383777
PIK3R4	7.095246826136968	6.552611066566067	6.558172102363777	7.065947676822781	6.765140433043056	8.360949970465002
MTMR3	7.794321928793073	7.684294872926521	7.975351968107907	8.954801132905061	8.728233336024033	8.378069664913502
SIRT1	6.860024757265882	6.060557940991199	5.374513196585053	6.402180152016035	6.506980923628873	7.968286902586821
NUAK1	0.4812839324331296	0.4588089767903088	0.6257818915319001	0.6387580604705797	0.6588055334443582	0.492370333260646
PICK1	3.5679519363673853	3.737233363862616	3.551367390752948	4.513998420998057	4.546928347028309	3.3894156215160494
SESN1	1.0375530999346416	0.6483677413211908	1.0205327457234226	0.8705688083084064	1.1277396157985244	1.1951795756812713
FOXO3	3.4052629276318815	3.392553200671864	3.0785240520121286	3.949569756612519	3.7258285294196334	4.000583634256692
SLC2A1	62.528348170589574	57.57844812597744	59.043772912512885	72.67216280766127	71.14448167719048	68.35072811031698
NFE2L2	18.240434331241378	22.19620543359793	20.34617620350509	22.26798946557487	20.626551811525	31.151750624522005
ITFG2	4.902029192147311	5.004289584030012	4.844736918683092	6.128662997588545	6.410524815894999	5.376704883947451
PRKAA2	0.6024071753949359	0.5355216795310187	0.7309078834362361	0.6283466651281637	0.6964944835273009	1.4417438693476938
CPEB4	0.718325156649416	0.9194013743507676	0.8145736070892372	0.9120914119838549	0.8840563421891685	1.3280183428186934
EIF2AK3	3.293019407584524	3.4693866715692003	3.328139153349925	3.965573531557769	3.934369204163323	5.042945655612604
KPTN	6.8601587800799075	6.161802302918668	7.438527545784403	9.927283254891712	9.486817882846998	8.16245185330202
PRKAA1	12.26893654648324	14.397949852999803	12.624766207861057	15.26929548762509	16.035927266225933	21.879603658568612
