# Supplementary material for: Peptide-based Self-adaptive Implant Coating Sequentially Regulates Bone Regeneration to Enhance Interfacial Osseointegration
Source: Research Square preprint supplement (doi:10.21203/rs.3.rs-5132912/v1), 2024-10-01
Supplement: Supplementary file 681 [file 7_mitotic cell cycle phase transition(GO_0044772).heatmap-data.xls]

id	S1	S2	S3	C1	C2	C3
CCND2	0.7863235272784257	0.7466716760358312	0.8819338171843343	0.17328940589048558	0.1790328443074608	0.1255705889573703
CCNA1	7.486003875214112	8.085715653401788	8.4316294815158	4.301180758037601	4.484631764509204	3.953245582300015
CKS1B	153.30063732436727	163.4078689620538	160.79822644844617	99.56766978385059	100.0757798924215	112.5134148826535
CCNB2	82.33162701639684	82.18912452240706	80.86605457515736	54.75594271510271	57.72741151250122	56.5744614796396
CCNB1	134.38337629171315	140.10595793961758	147.29588224644016	107.90686346087513	98.31110030908911	95.47425202763603
CKS2	141.9928910068572	154.17825065368868	153.0033057290789	110.38845187677883	121.05614405436319	102.61937690282058
CCNF	14.990317751700665	13.442073338185828	13.004281108826408	10.778668118600805	11.366745221507564	8.673720958619208
CCNA2	24.760349654771986	26.300788357418885	25.5112706736159	18.70117452295057	17.460844064687247	21.603420249339734
CCNP	1e-08	0.044436563952206805	1e-08	1e-08	1e-08	1e-08
CCND1	113.0731507347212	112.6486459939688	114.34916772390781	96.82489262312707	97.14694997291795	97.89416169740011
CCND3	14.315992983255507	14.171722597185548	13.129509415228856	13.002060322543185	13.115488224204789	9.869970481471269
CCNG2	8.002597685484282	8.428378781925037	7.94870107827635	7.0315794362135815	6.95595094474568	8.598859355618748
CCNI	82.31740016481004	79.87861708160119	83.31197228791822	80.25145593532761	76.82748883974686	83.86855699495602
CCNO	2.927889387001168	4.03714745887098	3.0053512276172363	3.0912197680569062	3.99801840221529	2.864287635896433
CCNJ	1.6906373492895483	2.0806707394174824	1.9038006421207279	1.759546536005496	1.739091980190972	2.287177617284708
CCNI2	0.1402328873261046	0.1119921358390078	0.0744432351738476	0.1560897149858637	0.06498963807574909	0.1243347392512747
CCNB3	0.2417996120690891	0.19612214299234018	0.20056306811400698	0.1088438305526782	0.2451307916255199	0.3246724378021525
CCNG1	36.62137272418097	44.29470088671561	40.569355802908355	40.10953323793485	38.933737814925706	49.94638148342806
TMOD3	9.542397053698133	10.436922910432745	9.49804210657209	10.38199835185335	10.120004129570507	14.418262257985589
SMC5	1.7334531485659845	2.4395916199290686	1.963646347816995	2.4494300231962427	2.1700494146036804	5.185862603592465
CCNJL	2.5089560952284855	2.244640965224676	2.5447109455046504	3.0473847233717932	3.428332529285459	2.794183578789757
