# Supplementary material for: Peptide-based Self-adaptive Implant Coating Sequentially Regulates Bone Regeneration to Enhance Interfacial Osseointegration
Source: Research Square preprint supplement (doi:10.21203/rs.3.rs-5132912/v1), 2024-10-01
Supplement: Supplementary file 685 [file 8_positive regulation of DNA binding(GO_0043388).heatmap-data.xls]

id	S1	S2	S3	C1	C2	C3
PLAUR	22.551909571351786	21.72184023175288	23.85101248351676	10.51406184648524	10.552725208349173	9.030756481281509
MMP9	0.2132308234684604	0.4044373274562802	0.28652357058992467	0.041883871208938404	0.0847027346544989	0.11997843814737069
CEBPG	10.957662619074616	12.743494894965156	12.089108662429057	6.2146372927021645	6.140139541003793	7.279730091876835
HMGB2	169.33101144952764	199.37399990217614	208.03009629271864	111.23369922208613	115.2216514927887	126.74488575269608
TXN	253.9873518995268	286.7086556494458	278.03362804606405	192.2961379167032	185.0459166090676	180.6005221498047
EGF	0.09781014721514719	0.0542449233154758	0.0612979151213311	0.007115697257024	0.0431706786820893	0.044472542863829304
HMGB1	53.64783124404269	61.71050378703546	61.2716868251693	39.8497156752474	40.0535932123512	47.43459738120872
PPARG	0.6935758829974397	0.7450943569730092	0.7324039034724731	0.4425929408864247	0.6328397616878112	0.5078522570181253
IGF1	1e-08	1e-08	0.0059810926724041	1e-08	1e-08	1e-08
FOXC1	1.0442367549636964	0.886377056183501	0.9149059390698007	0.8106309647764621	0.7513725099981812	0.7740310643999095
SIRT2	21.4853307845838	22.51636128336077	20.800703975425197	18.123608994856482	20.232462458811614	17.365253360323727
EDF1	288.26174104466764	287.14717070621134	292.70608210512944	274.1636180478192	282.90064681510034	210.52979397787811
NGF	1.8597766980263168	2.114913659483672	2.0368443681882624	2.139821984494747	1.9485311277648767	1.4777605872780428
SUMO4	1e-08	0.024446668737718502	1e-08	1e-08	0.0243197696844775	1e-08
PRKN	0.0189070959845254	0.0377487318618481	0.0141144115844892	1e-08	0.0657173640306683	0.024178274648480602
NME1	21.405146405056612	22.376026752633773	23.382617037105543	25.187369346307143	26.694025530484858	24.377258311203782
HES1	9.155684371012235	9.281907399536975	9.695485656641917	12.610579093281455	11.636379653773485	9.593066540117697
SKI	7.801922890431025	7.7569506864336315	7.200882883793474	9.734534872343398	10.138351772623762	9.061983871980125
