# Supplementary material for: Peptide-based Self-adaptive Implant Coating Sequentially Regulates Bone Regeneration to Enhance Interfacial Osseointegration
Source: Research Square preprint supplement (doi:10.21203/rs.3.rs-5132912/v1), 2024-10-01
Supplement: Supplementary file 689 [file 9_negative regulation of Notch signaling pathway(GO_0045746).heatmap-data.xls]

id	S1	S2	S3	C1	C2	C3
CHAC1	2.8751129893138563	2.6984190657361347	3.2001038213089363	0.390172180656791	0.5287478192229532	0.20111736796009008
HEY1	0.0602063573322711	0.1602723834811265	0.1398285014425776	0.009855036166809	1e-08	0.020531077918266603
DLL1	0.5198212417136535	0.3612744767091905	0.3340209593071214	0.15509755259035168	0.1895013765453888	0.1817528482397254
TCIM	0.7489309808700876	0.9379417178195313	0.8267715971822674	0.14710877129372368	0.2975015426301263	0.4597095914416482
HEY2	0.051245604677193704	0.018602517995705	0.032459261380516004	1e-08	0.0092529825398854	0.0047660136076634
NRARP	1.4522625196629655	1.647441921717325	1.5487629812900636	0.5186557453188655	1.0769850512336516	0.8875702812473839
NEURL1	0.0054354877418411	0.027130359122937302	0.0270510728359791	0.0053383284081231	1e-08	1e-08
GATA2	1.7667115546043242	1.6122953314355846	1.646952918868636	1.1718612236658632	1.3551539245094049	0.8430073977239586
EGFL7	22.107519428640884	21.20846243518511	22.324330502879977	16.559042938465886	16.752982222438323	14.048672482925847
DLL4	0.10177322254630079	0.1523955998019424	0.2387789362800384	0.1285123126936255	0.0505348521464669	0.0148739477037763
DLL3	1.2447360221890615	1.1469983906561525	1.4295579714226054	0.9299254991908524	0.9086095023211348	1.0121965677321272
MMP14	35.080150384324426	34.53575715788202	35.131429472379004	30.025013460356437	30.099517161690898	26.40844531647889
CCNC	18.245378475102246	20.167592083435284	19.702418467910604	14.785424195247884	15.318921530046948	18.570767680694743
METTL3	12.465257980706133	12.468796056821175	12.482436980173025	10.895896122318028	11.379768288178063	11.401233840252557
AKT1	67.67043383133128	64.8892333532084	64.81635966735655	65.56075740873789	65.7100648560409	52.27819116318971
NIBAN2	189.1052468084718	182.3803898980544	179.65817149371992	180.82246921342758	188.92252169054245	146.94882898840478
YTHDF2	35.93851806715195	34.84957977184942	36.39755404221782	33.3509893988567	35.36931385310113	33.27929850204753
HIF1AN	8.149904946492859	7.870147867138723	7.523200643750074	7.628175100783565	7.823591361399246	7.554209883187512
WWP2	11.520659534192681	11.730322322586785	11.61061894230386	12.349775451388217	11.87057024792059	9.966858576958321
TSPAN15	2.460138389967517	2.2424372967623607	2.376908742120418	2.5654341634199778	2.417549641895162	2.174205700051651
ARRDC1	7.629997058535813	6.597220370279452	7.034590934092388	7.053756600793067	7.864722294805884	6.967627628936721
CBFA2T2	6.222431200973157	6.345883021477222	6.174834217414472	6.409087908599356	6.670044472887153	6.3561686044020655
RITA1	10.670200874955674	10.56553352228869	10.006695946630204	12.296719955621777	11.66221011914127	9.313295107319401
ZBTB7A	6.901290493795291	6.763615746809252	7.335302586369017	7.4313005673813555	8.001727579993341	7.03383153296489
DLX1	6.617468066965506	5.898980838679626	6.62879636365938	6.924845803291758	6.445747929293632	7.245741538862978
DLK2	3.9218280725223376	3.3907043162456176	3.433075591461918	4.19562931532787	3.764314138090061	3.6718498052524637
NFKBIA	181.71806208453273	174.8171941891401	188.91928552041122	220.06312624019722	208.89158849847328	181.52396862316292
FBXW7	1.5287094329436743	1.3034453489889617	1.161308526457792	1.5966088859211123	1.2966793536337824	1.818515505407852
SLC35C1	10.618609941950632	10.298044305810166	10.923727196455184	13.0053980806794	12.89120562850849	11.925849529261525
BEND6	0.0041710632596074	1e-08	1e-08	1e-08	0.0124266699895061	0.0042671436939489
DLX2	0.9133994848086621	0.5977477134390079	0.7273230608427755	0.8472350835174024	1.3606281297556428	1.297832899495157
BCL6	0.3057577657413817	0.2673903007105858	0.3320035008422937	0.4318253387954029	0.4165696599039033	0.4911749800129967
ARRB1	4.986893088590462	4.874951370050932	4.6836591770051665	9.72245105658712	9.895205261378944	8.83048936980424
