# Supplementary material for: Peptide-based Self-adaptive Implant Coating Sequentially Regulates Bone Regeneration to Enhance Interfacial Osseointegration
Source: Research Square preprint supplement (doi:10.21203/rs.3.rs-5132912/v1), 2024-10-01
Supplement: Supplementary file 693 [file 10_polysomal ribosome(GO_0042788).heatmap-data.xls]

id	S1	S2	S3	C1	C2	C3
RPL24	795.1480603591147	892.5992414001828	930.6721855391178	732.0144141534827	737.0050624428751	581.5594369259356
RPL8	1975.0415218230348	1971.6462858038167	1992.1103067510167	1720.1217981298369	1778.9639873963438	1236.7819182614985
RPL36	396.0427981765342	383.9238445594786	397.4861394528692	323.62213630218395	361.98685891218736	264.33302708492647
RPL36A	0.4909072178800825	0.5227280401973141	0.06515005988933309	0.1928529005073855	0.0325009240592821	0.2678481601873211
RPL10A	647.3099093447588	667.4127753756953	681.1683112328237	557.526751159356	540.5101937015827	523.2464332441033
RPL18	1064.5782153684731	1066.5635418603715	1100.341838059299	963.4950404964636	960.6711665541122	701.0108352739047
RPL18A	1300.6961234852206	1240.7989172263956	1267.6319194505909	1126.6726955125612	1119.2746292437075	887.868719956636
RPL32	368.69382274405723	383.7942625430861	377.8943238087016	328.01316105843983	327.3442170552769	275.5341735660912
RPL11	777.3859522709358	872.0363423490418	932.340428878032	757.6562618916063	713.0220191158662	661.5280388967213
BTF3	401.0231240566184	439.9995088067224	443.22084415238334	372.6534490308699	354.5802093317763	337.0583489420403
RPL7A	1985.746110636384	1955.79311286734	2008.6278569935155	1778.5608154761892	1724.7709287396242	1455.5520738330217
RPL6	186.7616594638392	219.01568711593205	220.59898594089424	178.8355049508524	168.4286092551591	180.63857888129172
RPL41	2225.4190914719375	2248.084540844138	2301.1417337680027	1998.0634031449522	2060.7947368740206	1699.8223585439819
RPS21	234.42616038585084	258.7637010834403	237.54717392978696	214.6409610195732	229.802747397698	181.72113295996084
RPL19	984.9838272926588	1035.311652920721	1076.736343431338	920.2735316660968	904.6532586697124	841.957747384206
RPL30	1121.8914031048498	1190.692186114006	1149.6298655418748	1020.8930446947932	1066.5569789075225	911.3111099786056
RPL39	1610.3549698401298	1593.0966048487976	1586.7247040995248	1421.826066744038	1391.527635486288	1461.9097952601353
RPL38	314.3513087065547	336.78037339985923	332.18055938074286	288.4805261855938	286.7970637387619	303.41215619547364
RPL31	223.94213277384304	232.5421865653912	222.37215927464652	197.21548720543706	204.65211237583696	212.8766191573221
EIF3H	75.84156537637399	86.76994971130138	81.41576070766028	72.7012470787943	71.53956627585343	79.69843348654355
PNPT1	6.58712854617318	7.607106945721267	6.077694583944148	5.878817298387174	5.6024271079555135	7.482654964659617
LARP1	41.0484620177821	41.83738059996051	41.90191655946277	39.779889221161724	39.06592205203428	38.03445388064841
DHX9	56.43477857944935	62.75048675764869	59.00839254216604	55.7036523687085	55.25196623041042	64.97641119929595
RPS28	95.82009179204174	112.21661532832125	103.44529820928307	104.25919682878775	113.2148081358677	90.34528176297671
RPS26	143.1839675292662	147.75592708733316	153.34755857785015	139.42299720231438	142.64979041716882	162.3731023406344
RPS23	232.0441183182433	239.9299054576137	250.86123875015028	233.97375832668084	223.99817860320306	265.2971374818666
RPS29	26.768594527443266	28.98488713751053	28.817239482081572	29.12829720883385	30.82050111055507	27.78417325343731
LARP4B	6.881079836411519	6.938216079880188	6.48626621313435	7.532845300364057	7.633633598797977	8.152609233646576
NUFIP2	4.335943763539567	5.268283237900325	4.373122419295436	5.651258229843697	6.035854426882357	8.63187072196625
