# Supplementary material for: Peptide-based Self-adaptive Implant Coating Sequentially Regulates Bone Regeneration to Enhance Interfacial Osseointegration
Source: Research Square preprint supplement (doi:10.21203/rs.3.rs-5132912/v1), 2024-10-01
Supplement: Supplementary file 697 [file 1_cytosolic large ribosomal subunit(GO_0022625).heatmap-data.xls]

id	S1	S2	S3	C1	C2	C3
RPL39L	8.472604996629375	9.071823075905481	10.099464225251996	4.630321193197212	5.8694689244673075	6.116371306501456
ZCCHC17	14.631898430205759	16.04745353249493	16.601515980360514	12.10963965183645	11.382891166410275	10.944412394458013
RPL26L1	20.57337062990481	23.57774983703852	22.313480701833242	16.863760119167683	17.790295122336076	14.260665282333353
RPL26	1000.098935336472	1034.0111571422542	1015.0022474466564	781.7785782349533	821.6947604394038	711.5815363153158
RPL35A	444.9744821947991	455.8205854328598	491.38945939494903	409.8011474859657	381.1023492719529	254.1691125028461
RPL24	795.1480603591147	892.5992414001828	930.6721855391178	732.0144141534827	737.0050624428751	581.5594369259356
RPL12	1746.3606313776543	1770.317825578628	1837.5970795272567	1435.5499204618302	1472.483387846823	1305.8216773388388
RPLP0	1659.8085657931358	1516.2772532900474	1565.1702789847207	1334.5387467215255	1369.4972090331985	1028.0634779977638
RPL37A	295.076895616937	311.40136742688975	303.9625115241484	266.7483450346286	264.06323537700786	189.185391803588
RPL8	1975.0415218230348	1971.6462858038167	1992.1103067510167	1720.1217981298369	1778.9639873963438	1236.7819182614985
RPL36	396.0427981765342	383.9238445594786	397.4861394528692	323.62213630218395	361.98685891218736	264.33302708492647
RPL7	451.2568593370724	521.2668001479825	506.3348912854126	394.4169867486322	386.5067534836086	416.6672988948283
RPL36A	0.4909072178800825	0.5227280401973141	0.06515005988933309	0.1928529005073855	0.0325009240592821	0.2678481601873211
RPL10A	647.3099093447588	667.4127753756953	681.1683112328237	557.526751159356	540.5101937015827	523.2464332441033
RPL18	1064.5782153684731	1066.5635418603715	1100.341838059299	963.4950404964636	960.6711665541122	701.0108352739047
RPL10	673.099844007422	649.4385685763456	665.1187117590868	566.1418673969733	565.6965015968461	490.61719766735183
RPL23	275.4683648520426	288.71818361865724	289.4409541450515	247.5395014500441	236.34551804469385	218.03141324569478
RPL18A	1300.6961234852206	1240.7989172263956	1267.6319194505909	1126.6726955125612	1119.2746292437075	887.868719956636
RPL32	368.69382274405723	383.7942625430861	377.8943238087016	328.01316105843983	327.3442170552769	275.5341735660912
RPL27	877.3686797953015	939.9543918618268	965.266590362192	795.8415407401835	852.4529825995603	644.9644103181204
RPL11	777.3859522709358	872.0363423490418	932.340428878032	757.6562618916063	713.0220191158662	661.5280388967213
RPL37	150.23130927689033	157.46640062676516	153.46437939807714	134.6908431928843	140.64575932338064	107.20851667532665
RPL21	807.1800454810306	862.2720945484785	861.0661090270357	697.676792109908	681.4301275233901	720.2559798423372
RPL28	196.0187764002504	192.63459768909905	190.8865315817496	173.4986267757269	185.0671878501004	118.27117428113685
RPL7A	1985.746110636384	1955.79311286734	2008.6278569935155	1778.5608154761892	1724.7709287396242	1455.5520738330217
RPL9	438.582807483606	453.9475115536814	473.1383504725754	398.3514205594696	396.82477429918106	344.4583392810293
RPL3	1280.7619306791005	1308.8172363921924	1312.318259252441	1168.2753311509273	1153.5860141918088	960.812029304133
RPL5	1061.5788144426117	1240.4038689855738	1222.237909565295	983.2133746398064	946.5259222519568	1035.7929956140872
RPL13	447.3742367219069	438.31950256548583	455.0826035566913	402.21098507244415	412.44147524710337	315.1941363354265
RPL6	186.7616594638392	219.01568711593205	220.59898594089424	178.8355049508524	168.4286092551591	180.63857888129172
RPL35	1708.5517085912093	1641.458677624742	1755.454257099344	1458.7896814698736	1413.6225113097848	1434.380621297683
RPL22	298.6226258868205	321.36360582366314	332.0434408114053	277.9986113324522	275.35331054938064	253.94990476337162
RPL41	2225.4190914719375	2248.084540844138	2301.1417337680027	1998.0634031449522	2060.7947368740206	1699.8223585439819
RPL34	101.4937261683842	108.15176939600072	99.58544803837289	91.19412132401841	91.55349695362594	82.94160754818873
RPL29	736.9151889437987	718.4773346493572	740.7972418401507	672.3810030970515	651.0690733415196	567.669548950683
RPL19	984.9838272926588	1035.311652920721	1076.736343431338	920.2735316660968	904.6532586697124	841.957747384206
RPL4	670.0731870881708	688.4694076955118	714.7922511730103	607.0781617768	590.1136540745152	591.1122235518476
RPL14	75.82941919133062	82.39453420851552	75.53600499374265	69.39409218799554	67.76327175303132	65.23295125518136
RPL30	1121.8914031048498	1190.692186114006	1149.6298655418748	1020.8930446947932	1066.5569789075225	911.3111099786056
UBA52	121.7287111574003	121.45179972284271	124.73427423723084	104.87670169138578	112.95225235742936	106.77760022790191
RPL17	32.67298216482981	32.616430610919856	31.413444395826463	28.24177483596776	27.031901902507624	30.76157614239912
RPL39	1610.3549698401298	1593.0966048487976	1586.7247040995248	1421.826066744038	1391.527635486288	1461.9097952601353
RPL38	314.3513087065547	336.78037339985923	332.18055938074286	288.4805261855938	286.7970637387619	303.41215619547364
RPL27A	244.7040765053541	240.695106737574	253.83778959842812	235.8208972514309	235.6934467600104	194.25321644508722
RPL31	223.94213277384304	232.5421865653912	222.37215927464652	197.21548720543706	204.65211237583696	212.8766191573221
RPL15	173.55391299647192	167.95507020433004	175.1331793231044	162.56235303004655	157.48053448104605	148.060480459369
RPL13A	2239.869098051186	2248.3682279068244	2319.465746151882	2154.535551821368	2194.6047559207086	1822.3289533633047
SNU13	32.64075888244816	36.25784122424386	36.73120767933493	34.15020279931712	34.45680021140376	30.96286252183498
NHP2	112.15640199748023	100.21568512752275	104.755145508187	101.7198464815548	110.97250977959155	87.12826726197852
RPLP1	715.169900393452	767.2355412355148	775.6355671084198	736.6387950623724	788.3653428672684	625.2134793076809
RPL7L1	41.291192025744294	42.0375973603285	43.567752760104746	41.45561991740231	38.81226071898924	43.27305212039635
RPL23A	906.323987436792	1013.3033691317452	1016.117790483976	911.7845419669004	963.6256990633034	983.1500621965856
RPLP2	1075.6204077777645	1136.0219445434273	1254.5573526376636	1228.356101574094	1096.5585399594493	1190.5116157484488
RSL1D1	21.31605728299061	22.16579447523158	22.155699632209068	20.89906125064361	20.43216563912075	25.28702565194589
RPL36AL	135.2110467232195	166.05483357836212	157.09855122702098	158.5931165608964	152.24086818738462	163.2770229410896
RPL3L	1e-08	1e-08	1e-08	1e-08	1e-08	0.039289224011671404
