# Supplementary material for: Peptide-based Self-adaptive Implant Coating Sequentially Regulates Bone Regeneration to Enhance Interfacial Osseointegration
Source: Research Square preprint supplement (doi:10.21203/rs.3.rs-5132912/v1), 2024-10-01
Supplement: Supplementary file 701 [file 2_sarcoplasm(GO_0016528).heatmap-data.xls]

id	S1	S2	S3	C1	C2	C3
SERPINB5	0.0187258438444482	0.0467335662711649	0.0559163874050178	0.0091955644909849	1e-08	1e-08
MEF2C	0.10826064470165689	0.08916044402483929	0.048490848045212205	0.0159488308733014	0.0268780752022535	0.030457476654233602
IFRD1	27.263299843795444	32.07367861285443	32.70831914262448	17.230233742693688	16.45981124497018	22.8684439060817
CTHRC1	0.3933366204009735	0.33911184545508627	0.1779583300494706	0.12291546199005049	0.053266045030395504	0.2011985801021236
HABP4	9.0741081236929	10.275322933413674	10.309578317957698	7.104154548617172	7.864915693218969	5.574833824727398
DTNBP1	6.5344660936755785	6.2756255353458	6.743640657175982	4.727295900006807	4.838001374628972	4.066203562322127
PLEC	61.67480935480671	62.203746840440424	61.34488634655346	54.665017277466966	55.14303916506478	37.792843941579754
SCN3A	0.0087280138595115	0.0021782342803801998	1e-08	0.0021430076297545998	1e-08	1e-08
NFATC1	5.112800437829513	4.499579464204883	5.185054661690626	4.139313707957449	4.1392672847014085	3.8489129963910047
SERTAD1	9.178174540745314	7.026807299086848	7.232280788117988	6.643214510694508	7.595607103777714	4.951543863675823
SPOCK1	1e-08	0.0412309419009282	1e-08	1e-08	1e-08	0.0105634657572839
ELAVL1	18.57000175846489	17.248341293827384	18.127441794317743	17.320906847394788	18.400778499991414	16.55254782005543
BCL9	6.507023038632876	6.572086642367258	6.492798821805904	6.659459500070093	7.2213418176584945	6.65691266121699
GSN	45.194966617479395	45.21953355144817	46.62921292335146	51.51454426086664	53.45446894549232	39.6544419785626
CAVIN4	0.3778411570679344	0.4333639882304798	0.4240957108047892	0.3237143976006528	0.8941633111945554	1.0280445260817028
