# Supplementary material for: Peptide-based Self-adaptive Implant Coating Sequentially Regulates Bone Regeneration to Enhance Interfacial Osseointegration
Source: Research Square preprint supplement (doi:10.21203/rs.3.rs-5132912/v1), 2024-10-01
Supplement: Supplementary file 705 [file 359_vesicle membrane(GO_0012506).heatmap-data.xls]

id	S1	S2	S3	C1	C2	C3
GBP1	0.7739186041265855	0.936957603630946	0.9096346982978283	0.760084785182111	0.7113348916935175	0.6485577809308454
SLC2A4	0.1697254195708658	0.19889802549007798	0.1983167618631301	0.1956814095681605	0.1099253237738386	0.15853635400531768
RIPOR1	16.49085225726702	14.520151378875383	15.539941221281687	13.629721898454136	14.156930518679777	13.204539506953989
DGKQ	3.156435263477284	2.6352646313293366	2.9360834292555302	2.8716986242807208	2.9909672438276864	2.1774260166513995
STK26	12.984659722156477	13.229521455885383	12.938712824086814	11.181591172478806	11.327961725839339	14.401849045854856
GRB2	44.03523148232001	41.60420222658865	42.914097017962696	44.33920500686435	43.42100273303917	37.794321249319324
NCK2	7.895921237862018	7.464814418516508	6.5309868691962905	7.5735949192121375	7.340568185341888	6.794414753085046
TRAF2	10.914081781970024	10.519495051475237	10.385921755720965	12.168484079442276	11.696053395536424	8.394876892567302
RAB21	2.6397311459190504	2.427417460262152	2.6147142230045355	2.320556522426122	2.6612269950184015	3.124697110319674
GAD1	1.4412182035032735	1.261650008100873	1.22485864881635	1.5080054540346222	1.3982265139338692	1.2589250653345871
GIPC1	28.12810216663536	25.376998363159537	26.714251910817605	28.498889142241808	32.40151039372501	25.87469280101875
WAS	0.3572920802303587	0.6399145113130147	0.3660910603802508	0.5366789539633094	0.5113614379985529	0.4837795407576378
NCK1	4.348060604373201	5.0346060270926	4.358836951991713	4.912418478325696	5.013624867903669	6.162746507438857
CLCN3	5.9313824309337	6.323365924412428	5.384020033723989	6.284422384818772	5.973614168419122	8.78542626982651
SLC26A6	5.44215519696792	6.125730356304881	6.286968614745652	7.668003924598857	7.072706666181509	6.391683184091103
ANXA4	17.025815706370164	18.46293054974733	19.280795330026532	21.595006642320644	21.964269830258164	22.005450029113195
BAIAP2L2	0.0070533543820776	0.12674046167167238	0.0140411280871658	0.0761999319502182	0.1190779837142261	0.1010214696465491
ASPSCR1	6.7177673453386175	7.544407494106407	7.417882347409225	12.201972339393915	9.049885756035849	7.70228913685934
APPL1	6.459204666676223	7.235755840543014	6.251042490742138	8.285220137069349	7.396126278492104	12.250586121980877
PIKFYVE	2.7174629369852097	2.917629309964561	2.2000236472389765	3.688255220652012	3.1859392044302526	5.089536626724176
FNDC3A	3.53250403558056	3.755063596645549	3.3810810240044122	4.961303799123758	4.693410478281527	7.970877163065553
SYNJ1	1.3243971009259325	1.2982400803902192	1.127881325789063	1.6951666745254832	1.616750461429873	2.1619778246791057
SLC4A11	3.2898277989765785	3.2919067459718634	3.2667856482018656	5.521415145540562	4.93735983180212	4.683972030791786
