# Supplementary material for: Peptide-based Self-adaptive Implant Coating Sequentially Regulates Bone Regeneration to Enhance Interfacial Osseointegration
Source: Research Square preprint supplement (doi:10.21203/rs.3.rs-5132912/v1), 2024-10-01
Supplement: Supplementary file 709 [file 360_high-density lipoprotein particle(GO_0034364).heatmap-data.xls]

id	S1	S2	S3	C1	C2	C3
APOO	5.324976547325509	5.038897395745295	4.554880864317437	3.4729090363001762	2.671625815249473	3.6033853344924873
PLA2G7	0.0260040392488814	1e-08	0.0064707993455731996	1e-08	1e-08	1e-08
SAA1	55.54082319263353	67.81973687071456	66.05588051779446	54.03307819902778	53.70636759664686	40.07682982917458
APOA2	1e-08	1e-08	0.0522987314828929	1e-08	1e-08	1e-08
HDLBP	80.24724701737932	77.53674153673815	78.25498901538563	79.45521341377884	79.50598149951452	70.86780469393554
SAA4	0.0395323258938352	0.039463901962317	1e-08	1e-08	0.039259050633513703	0.0404429548993157
APOE	0.1941594353325854	0.26430460180999027	0.4392203144452739	0.5027250797622834	0.3856345267827789	0.10834468166506979
APOM	0.679731424113433	0.8685502959828734	0.8660120268695638	1.228349406852536	0.7560365566977981	0.6675735109581378
APOL1	5.166863948294449	4.613771793485934	5.15813069386301	5.496753257733856	5.4818642627012135	5.0659650716020215
PLTP	0.8033986878424576	0.7649923772695308	1.3778831494956927	1.2503216077370056	1.190630269609939	0.9104178663935296
APOC1	3.6572189912949735	3.711234218931977	3.640219514769227	4.363647724884647	3.872065825880661	4.45265044842952
SAA2	0.6512578163320133	0.8703361174270601	0.7423286362274483	0.7737297109496014	0.8240921451033238	1.225057919181298
LCAT	3.163113788403793	2.310062188569589	2.7341464051718303	3.2700768744411848	3.9513594673450334	3.3381650074381737
LIPC	0.22202618326967968	0.3495122093439567	0.250743374476356	0.7841681421628239	0.530027345828769	0.7294706482405298
APOA1	1e-08	1e-08	1e-08	0.0187578128727147	0.0189671845391976	0.019539162827123403
