# Supplementary material for: Peptide-based Self-adaptive Implant Coating Sequentially Regulates Bone Regeneration to Enhance Interfacial Osseointegration
Source: Research Square preprint supplement (doi:10.21203/rs.3.rs-5132912/v1), 2024-10-01
Supplement: Supplementary file 713 [file 361_basement membrane(GO_0005604).heatmap-data.xls]

id	S1	S2	S3	C1	C2	C3
COL17A1	1.988168370277272	1.5904398612325816	2.1732858687994483	0.9370879667701912	1.0048411711899354	0.7945179492639989
VTN	0.015316958962556	0.0152904478451781	0.0609830210280227	1e-08	1e-08	1e-08
COL15A1	0.0045614310646732	0.0045535359956518995	1e-08	1e-08	1e-08	1e-08
ACHE	0.8084313674872565	0.622972154188741	0.9670200486264531	0.250730732681299	0.2887417581673294	0.6094079382664549
CCDC80	0.1761455456589796	0.2324330620014528	0.22973854459471618	0.141181411606977	0.1266719328310025	0.136705777735432
ENTPD2	5.758327545858451	5.310728420742449	5.177274871317443	2.9440648346161162	3.5770178321363266	4.30307547466792
EFEMP2	2.678549479869786	2.468227709980285	2.2302944014286865	2.0235925598258584	1.3811712223600194	1.7390048175631319
ANG	4.324677999237059	4.317192693509759	4.644858731571253	3.0218472922811332	3.1913800873049913	3.165208662621122
COL5A1	1e-08	0.0023166566582426	0.0092395157707384	1e-08	1e-08	1e-08
NTN1	1.6170200568548516	1.5290487832414235	1.597371889811101	1.20505267455107	1.1620163774624372	1.0682083637762176
SERPINF1	0.0147982031153393	0.1329532289104799	0.058917642757911504	0.029067359906143803	0.0146959075633474	0.030278150566332603
LAMC3	1e-08	0.0032495527965311	1e-08	1e-08	1e-08	1e-08
LAMA3	0.7939627973308852	0.8562591282569147	0.7793267017970055	0.7624904511820101	0.6181114860287154	0.6097513330890303
HSPG2	1.1522169634825739	1.196297392861926	1.4290645648413718	1.0555320812691162	1.2293752098765223	0.8431747828694461
FBLN1	29.91226626040033	28.76696661757689	29.022340019430583	25.911546332485155	26.216161071384192	20.61583312568855
COL28A1	0.0018755547709252	1e-08	0.0093341443410238	0.0018420293498019	0.0018625896821381999	1e-08
MMRN2	1e-08	1e-08	0.052507975602735	0.0057566997966627	0.0058209550692195	1e-08
NID1	9.039691070507997	9.50893171361609	9.335673822680144	8.143541168245203	8.242975623028741	7.488924958744714
THBS4	0.0253103342003213	0.0063166390488464	1e-08	0.0062144853419766	1e-08	0.006473347217116
LAMA5	54.84860323883368	57.11894535531015	57.350435445749646	52.88749311241597	54.55279970437275	41.411996030077894
APLP1	44.058491659202176	40.53059582531617	45.6996217319308	41.830294984998545	42.4012503534532	31.56744545339313
ITGB4	28.644248366289144	28.31564446852408	30.30682326149277	29.094809474286517	29.83772920018568	22.170231763507722
RELL2	4.119683455778617	4.979248005436847	5.320528041871398	4.64793482544332	5.452122758266686	3.204474495802243
ANXA2	413.6578656999343	438.46512293450496	442.52202674143	406.7421457559436	406.1720513232837	395.1866309710881
EGFLAM	1.229070902384081	1.4457009642125025	1.2138745432096716	1.0901340502491725	1.3625019863857575	1.2037732800425638
COL8A2	0.0138440116748839	0.0322467699692085	0.050525400737780904	0.022660909523828102	0.0274966143347567	0.037767740645275404
SPARC	0.07938539080100779	0.115269795853421	0.1221162365167057	0.0921420773133181	0.0788366230368735	0.1328956910078935
VWA1	1e-08	1e-08	0.0055186195242411	0.0054452849211976	1e-08	1e-08
PXDN	0.9114363259025965	0.7943211581233147	0.813599812517198	0.9271138149537085	0.872809555539446	0.721524230284772
TIMP1	184.4159989599184	176.8717618835437	184.0839431605196	188.6263464025295	194.17103531363392	174.02153242353486
LAMA2	0.0738332302356793	0.06586443420353909	0.06254471539394789	0.09719888861733719	0.06552254154804929	0.0514273954655106
AGRN	146.26343977596645	143.15603290741296	147.3069844096269	166.29728637550346	168.8869148097065	123.29454993677443
LAMB1	12.640369856706153	13.21882574725776	13.004814694042155	14.22391903044015	13.321385889436499	14.103217477911652
LAMC1	49.15109823641468	48.260173998015354	48.64125403772383	53.66801155444585	54.341909523451825	49.01078967209474
COL4A4	0.7915094788787531	0.8383922999418014	0.9141238055845397	0.9672509843331565	0.8860428411828692	0.898339659437494
COL4A6	0.035469308380891705	0.017703963431943803	0.023536296715301403	0.0261264726767363	0.0293534346369732	0.030238622967682
ADAMTS1	0.8505206631587043	0.8874236272502516	0.88483020232778	1.0571250703720807	0.8350972953260456	0.9831779103113613
DAG1	36.03778629623213	35.59831007799515	37.12235119960798	42.75058334125879	43.07019850437648	36.763575459890816
CD151	254.0070574818247	245.40757300152944	242.1717417209421	301.7005938177142	306.80432596082835	234.5987153425524
THBS2	1e-08	1e-08	0.003550001978074	1e-08	0.0141676718067384	1e-08
ACTA2	4.13252639491972	4.414149828329303	4.127028654275592	4.505109665434005	5.321467425959747	4.9041544567510975
CASK	16.31796077012276	18.24209355606739	16.006561786633153	18.00585181604797	18.898365716793286	22.738025430113005
COL4A3	0.1301673916016525	0.1963569358612849	0.2792788272288563	0.1818178028624023	0.2843886701988681	0.3639865140938417
MEGF9	3.3997791768698282	3.200521648143914	2.766203909995644	3.680673954258257	3.576498611713105	4.096870328300685
LAMB2	35.85272163066848	35.925692716774776	35.97704916106363	47.84046831717729	50.03402411353289	39.60234382612465
TGFBI	37.32130496180832	36.98168301548371	36.85532557748436	49.31719639821449	49.110714722841884	44.44742278314069
LOXL2	156.86828788702337	149.72140323163626	156.8919479533188	215.34288392740692	209.49103083431226	178.0178659976966
COL18A1	56.34616685527704	54.64699466186172	58.791042122793684	80.72435987913477	80.60580605752519	64.03269081514934
SPN	1e-08	0.0067468897656064	1e-08	0.0464643857454926	1e-08	0.0207427958506666
HMCN1	0.0393064269458704	0.0216487735907567	0.0067454777504465996	0.0439284874540768	0.034996640507589404	0.08181030996775869
FRAS1	0.019281195515156602	0.0059224139867221	0.0147627505805688	0.018936543724288903	0.023566656592771403	0.022760004598531003
ERBIN	6.22564275894083	7.979410768004779	6.9126697302935325	9.142787891424044	8.64678942632509	15.635976846557801
COL4A2	62.189987393667096	62.75346557049428	64.68138089710024	95.90923391640041	98.7064003803381	72.01410306088415
FBN1	1.2764827917042059	1.4884370067870207	1.27268482469577	1.8689099227504347	2.0879086745819118	1.9379796652709407
DST	0.9481997758495888	1.403644821488168	0.9570025132177808	2.026882290594178	1.6841242884641323	3.9201447883853007
DLG1	14.343597225873788	16.355122956322827	14.21547900374549	20.614136024427946	20.56168455052839	30.71545560171893
COLQ	0.0599948525489098	0.127268387873055	0.044786990998900204	0.19886322094325248	0.12660775621648068	0.2685236278951858
P3H2	8.65694298247354	7.634313790596505	8.470184950959752	13.300607382842886	11.87583217777032	13.35983113830788
EFNA5	1.4562227013051499	1.3410121257687977	1.3623742968784434	2.181320993854707	2.0935634221856	2.6503991888181613
COL4A1	8.99435601909717	9.871565511078577	9.790260307571485	16.68373716298592	16.482981854282688	15.75469896020097
COL4A5	0.7003988573498348	0.8876927659265613	0.8509248654921319	1.6185392950964475	1.4695350669641571	1.443602398031407
FN1	648.6842079306692	692.4591130329909	680.8880931928622	1348.3974658506463	1359.7890207798928	1188.2794037785443
TNC	45.737991037442484	49.38816389420429	48.22971116048011	99.34960669010097	99.58858683521909	80.65334287546042
TINAG	1.4948282722317954	1.2772571033683797	1.5004891676622891	2.587851682824096	2.604156413365479	3.304760487149072
COL7A1	18.55338905596185	18.34875069168716	19.57867154682391	39.18014999292784	41.07236656751183	33.88140415748612
LAD1	0.0758442704129918	0.0946412431033869	0.0660552661401746	0.2048435002217135	0.2730349062216584	0.1648816011197836
NPNT	6.116920707695272	7.159149413623388	6.277441128682607	16.510488624844793	15.11327599963415	19.77148796792401
