# Supplementary material for: Peptide-based Self-adaptive Implant Coating Sequentially Regulates Bone Regeneration to Enhance Interfacial Osseointegration
Source: Research Square preprint supplement (doi:10.21203/rs.3.rs-5132912/v1), 2024-10-01
Supplement: Supplementary file 717 [file 362_acrosomal membrane(GO_0002080).heatmap-data.xls]

id	S1	S2	S3	C1	C2	C3
PCSK4	0.8107023121864799	0.7290983072510191	0.7633159537547164	0.7818648396528408	0.6092634793036802	0.403480650901678
BSG	717.6982138637187	667.093244864123	699.2458048871982	615.7644129478375	617.5883303314313	480.4621854138712
MFGE8	5.746617741142581	5.912181339739864	5.669907145255888	5.027212246787907	5.821629550977344	4.424660478280727
ATP8B3	7.896243848410529	7.972366293305492	7.9396437775673405	6.699698184722469	7.771140919586563	6.712406515832452
IZUMO1	0.08821261571351649	0.161443204391297	0.0731688234087699	0.043317911321168905	0.07300235828545949	0.1654484209517462
ACRBP	0.235326236895586	0.28712312947386587	0.3383356759082272	0.3209996812076124	0.1428163625408139	0.3477456464571086
DCST1	0.0108425694310475	0.0541189737271653	0.08633729857776669	0.0106487583439355	0.0646056580603753	0.06655392019565229
DCST2	0.046494146303266	0.0464136726065832	0.1234080696534723	0.09893662303617319	0.053868202032917104	0.0554926630821351
CFAP65	0.0023079850730345	1e-08	1e-08	0.0022667299468093	1e-08	1e-08
RAB6A	36.97873277458946	40.644066465569466	38.6446975264325	36.395053421060894	36.60939384075706	45.92819363432382
FLOT2	76.8587445757806	68.58089468977722	72.84661390709275	79.14071449459257	79.10617216910853	70.35967191302517
CAV2	30.80337584024189	33.372097572690315	34.05731716173978	36.609166174867404	35.93224912636313	44.9161874633989
CCDC136	1.6770933440765619	1.4757937690611975	1.4923037216958202	1.6334178245389288	2.1433358739019135	1.7941991992963975
HYAL3	8.790890547997734	8.360872011505496	9.538436068067654	11.273615574276192	11.928157428759206	8.95353664354925
SERPINA5	0.12026293763137749	0.0654844312544154	1e-08	0.0644254049412293	0.48858376854263197	0.0894786940616994
PLA1A	1e-08	1e-08	1e-08	1e-08	1e-08	0.0130930497156058
CAV1	131.66904513432004	142.50909818134565	137.65039037265183	160.7029859555012	164.6135657270134	202.81782316186784
RND2	2.040453313140604	1.3461395116545292	1.7425124343495164	2.4105848123268405	2.5197200081049083	2.069303479011297
TEKT3	1e-08	1e-08	1e-08	0.0042785083288472995	1e-08	0.0044567277342258
SPACA6	0.2246793012610262	0.2820621902500765	0.2473538045258423	0.4346395320041837	0.4361102112418897	0.4388137013761187
VPS13B	1.6455265941885708	1.8240681324202568	1.4942043657122512	3.1338244149892063	3.108092161177316	4.753218015185637
