# Supplementary material for: Peptide-based Self-adaptive Implant Coating Sequentially Regulates Bone Regeneration to Enhance Interfacial Osseointegration
Source: Research Square preprint supplement (doi:10.21203/rs.3.rs-5132912/v1), 2024-10-01
Supplement: Supplementary file 721 [file 363_integrin complex(GO_0008305).heatmap-data.xls]

id	S1	S2	S3	C1	C2	C3
ITGA5	36.15573073753843	32.93859819922859	36.0393287014967	26.952065897499295	26.783319254513703	22.010269811849653
ITGA7	0.3266946148041475	0.2140222648315043	0.2743673137663718	0.11029389169961899	0.2737431053785896	0.16711002622672788
ITGB2	1.065134860875409	0.9929264238066	1.1459340714732753	0.6307340809351086	1.0966605695833422	0.6249579698592378
ITGAX	0.0100081912389456	1e-08	1e-08	1e-08	1e-08	1e-08
ITGA6	32.079809839682945	34.556399619494854	31.99606132740349	25.363121427329972	25.12856805029925	29.224493219380303
ITGA3	473.4087770191462	451.9850576059925	460.7880083101432	409.2592789913013	405.5662592604847	323.7915939659069
ITGA2B	0.9664338894971789	0.9075901209241128	1.3823458659013812	1.1108673976030956	0.8815511035010338	0.6884251887690368
ITGB5	60.82205507644223	60.49901056104875	62.30227260391504	56.22014350949679	53.46909397880343	46.52119480330781
ITGB1	337.2789188970054	386.8464948052394	348.68269417592273	291.6110530987299	280.3792962268746	349.7521774433717
ITGAM	0.046513442479362004	0.0051592239315749	0.0051441465393008996	0.0050757881585432	0.0051324432017251	0.0264360499321113
ITGB4	28.644248366289144	28.31564446852408	30.30682326149277	29.094809474286517	29.83772920018568	22.170231763507722
ITGAL	0.0229078089451031	1e-08	0.022801328968810902	0.0269979955916336	0.0045498988151423	0.0046871062631657
ITGB7	1e-08	1e-08	0.0327255466110775	1e-08	1e-08	0.0336357265499259
ITGA2	5.871478884824919	6.634794514984272	5.382720723102617	5.354854068691374	5.37362812435544	7.478361003201793
ITGAE	2.3023582335314576	3.0688260237200837	2.718914391828255	2.9169951071489804	2.790235168117281	2.847763501291304
ITGBL1	3.931320999772551	3.870067528380056	3.56225130167895	3.8940137101329118	3.929144796045182	4.6485540658211155
ITGA8	1e-08	1e-08	1e-08	0.0137455424226018	1e-08	1e-08
ITGB3	56.463605555810794	55.53308925325314	55.157994095143856	81.91132479556963	83.89136922692305	84.98879627560113
ITGA11	1e-08	0.025058171196523402	0.0317990127268167	0.123264589625353	0.0543885654680894	0.0583632482411785
ITGAV	17.995640516428463	21.161855801644595	18.22117607502983	29.382039426865568	29.662011472684284	46.96465000537877
ITGB8	0.1942695810851496	0.1915091659052768	0.1450249357969457	0.4078285899307168	0.4823166168469907	1.0955795128643617
ITGA1	0.2134214918560626	0.3056834354458166	0.277081909957801	0.4852847774648168	0.430803621869808	0.5007526800322321
ITGB6	0.0536637872314505	0.1392843345728837	0.2563888294739885	0.4005544801352133	0.5275988818621535	0.6752690899931001
ITGA10	0.044505655127083904	0.0488714844994383	0.0398689066844212	0.1704694208103614	0.128174183047587	0.0910616800735129
