# Supplementary material for: Peptide-based Self-adaptive Implant Coating Sequentially Regulates Bone Regeneration to Enhance Interfacial Osseointegration
Source: Research Square preprint supplement (doi:10.21203/rs.3.rs-5132912/v1), 2024-10-01
Supplement: Supplementary file 725 [file 364_endoplasmic reticulum exit site(GO_0070971).heatmap-data.xls]

id	S1	S2	S3	C1	C2	C3
HLA-A	240.03249593185072	228.4411735012101	237.57636293007386	194.0082280020484	190.8887089759282	158.9826655049558
LRRK2	1e-08	0.0026273218394018	1e-08	1e-08	1e-08	1e-08
MPPE1	3.080437265111101	3.2081858362235387	2.9429053557035885	2.6372660527366305	2.5154005182639034	2.81044063327476
YIPF5	18.581818678696113	19.164805110792855	19.992314686040142	16.606981821657214	16.209531735486877	18.311898360288122
SEC23B	28.704147976908146	29.551759951096944	29.955181147914182	26.16774775915371	26.850763725476156	25.9757492088993
VAPA	15.114370615686527	16.634386234926335	17.084545118407554	13.949394266516538	14.079243964185824	15.72883933963655
CRYZL2P-SEC16B	0.5717223474287723	0.6462015875502914	0.512628684660434	0.5522217551292711	0.3800775746989581	0.6187287287783765
SEC16A	19.558017558195203	19.23370757506252	19.094753042570673	18.934663219244865	18.79392637335557	15.693657271725252
PREB	14.776945508144161	14.517591408605837	15.17444823083894	15.777790337193005	13.314296653622552	12.74551708800157
VAPB	22.223634965374842	21.200714523535588	21.28757701178541	21.19527741883895	20.992730212594246	21.332891490835266
CTAGE4	0.2857211459057306	0.36128703622480707	0.2654335210978797	0.1870759178089488	0.2742878388238228	0.42871069168605447
SEC23A	34.544564770825204	34.68015497020515	36.618223931191295	32.04090697514514	33.923108413990654	38.48763976139623
SEC24C	38.075965718148595	35.27738029782439	37.055867581273375	39.58672860368324	39.61312104109808	30.863368307148292
TFG	65.86150832838189	63.39974576674953	67.19600597573067	65.16790759419065	62.481761289439724	69.33223156663205
SAR1A	18.19942846499649	22.622484440950352	23.04618651251378	21.044269747550413	20.25206405548993	23.3970427413369
SEC24D	10.684343282227163	10.424709476434703	10.468224477284101	9.556561770805153	11.28094522978973	11.405694990309392
MIA2	1.3728170020845611	1.3934520158886838	1.3791824806647648	1.154588687521926	1.2386946065413784	1.8891812997589668
SAR1B	3.6179575278788425	4.091256657738946	3.88131226862327	3.346871446254704	3.7271241207766246	4.8454743577471335
CTAGE9	0.0193289653846458	1e-08	0.0480977864510889	0.018983459705875002	0.019195350007073002	0.0790968056121658
SEC31A	22.622496609954492	21.189243901051924	20.922150611327012	23.7516244713433	23.489627115303488	26.30147048893489
PDCD6IP	19.398098464112934	19.248853520585335	17.36764111459815	19.526636659573214	20.07626113396584	25.831187834054344
PDCD6	61.72490329385823	64.93303457145674	70.66150934501617	76.90631583127028	75.9375951467382	80.20163890303766
SEC24A	4.449198957042417	4.476345828799062	4.122122862659671	4.6969270797823945	4.487776581500749	6.937913000239268
SEC24B	4.854837394434902	4.289720271177258	3.6962786476156215	4.5769950788786025	4.8513298185399165	6.83303948539472
MIA3	3.843353387750968	4.685434092323343	4.028375771380887	5.128576428253399	4.655785698913495	7.109221660603066
CTAGE6	0.019099211697174902	0.019066154122898502	1e-08	0.037515615745429505	0.0189671845391976	0.0683870448949319
TMED5	8.771054845725741	10.412505317323586	9.67295223559546	12.163050347152494	11.875153703784799	17.99856527238613
CTAGE8	0.3619134488139254	0.20916618307751988	0.3223121306188539	0.40221321178924	0.4539936577083965	0.8379345242045612
SEC31B	1.4833576033578046	1.6685715145698707	1.5674042044296805	1.8896725673317183	2.3003900193262834	3.0295553537417947
CTAGE15	0.2599322455446992	0.1537673200039258	0.2108121737509114	0.3687463659701517	0.315498832872343	0.5909328732370064
SEC16B	1e-08	1e-08	1e-08	0.0128489900101663	0.0043308094395226	0.008922809960276199
PLPP3	2.602393160774743	2.430773190447027	2.794793832085816	8.564424234912616	7.775880936210808	8.267264511783134
