# Supplementary material for: Peptide-based Self-adaptive Implant Coating Sequentially Regulates Bone Regeneration to Enhance Interfacial Osseointegration
Source: Research Square preprint supplement (doi:10.21203/rs.3.rs-5132912/v1), 2024-10-01
Supplement: Supplementary file 729 [file 365_histone acetyltransferase complex(GO_0000123).heatmap-data.xls]

id	S1	S2	S3	C1	C2	C3
MEAF6	13.868474439323997	14.075649405021105	15.307521907296762	11.38235529975828	11.51985696275709	11.85109905601399
PHF20	13.905985105842861	15.507903474279837	14.332036056165636	11.75172935065319	12.427304782127905	13.528309174824324
WDR5	19.492415839615823	17.820174510703122	17.536363876840817	17.103258584080866	16.490723787581523	16.386623087503548
KANSL2	14.032222934794072	14.406066766155565	14.18637532764279	13.214472947546447	13.445352864132596	13.80786562252745
BRPF1	6.690330687767324	6.7082375852114176	7.100241496698844	7.117093807300163	7.020531514314537	6.2400770015119384
KAT7	6.386123280567553	5.572977819112377	6.047445740193124	6.579420693081546	5.704671289904508	6.800108197931037
JADE3	8.604759099552675	8.340595054989487	8.296336957552741	8.676568985237516	8.8031726966707	9.569334389736035
KAT8	6.374928317822271	6.536150153366207	6.202169405257631	7.720301571099482	6.340380406077641	6.619846937803704
KANSL1	4.217676878820448	4.096088588631743	4.21858403706001	4.655011698724972	4.604644773096919	5.176860558250192
TAF5L	5.613655363671268	5.1125488732594695	5.573662576380373	6.312192619422896	5.970081706337786	6.932274513957147
MCRS1	23.29758310631331	21.7532086671822	21.085748850502313	28.690802047779933	28.227776229694904	22.84115066884864
HCFC1	13.206637629524437	13.721945604434692	13.697397751879897	17.505535650548083	17.23280167024202	14.66451117775859
JADE2	12.415787656991128	11.473597826531401	11.717139099677935	15.4086585606978	16.163506371769287	13.312514757089605
KANSL3	11.171381068181002	11.46364085327001	10.651508982689005	14.782832029055292	14.140361721082323	13.246112614498157
CREBBP	6.002527795994773	6.323460720774111	5.794236162760662	8.129802151010177	7.910459202141568	7.653098678401292
KAT2A	10.002786993509039	11.390502861426347	11.035077657869094	14.273979405818903	14.687437106481832	13.590369481379312
JADE1	3.0865734059448324	3.370872290717787	2.984212755083437	3.9541190487608158	3.7704882773008097	4.9244995450275235
ING5	3.033138332570188	2.710615418992995	2.874620950867916	3.9537993262236975	3.892722306069122	3.755651399568232
EP300	12.692399625523615	12.31926142049435	11.554735011479789	16.577974828181958	15.878379141632841	17.46587934871418
OGT	31.87119283852371	33.71510986061826	31.207667142148892	41.871121905306346	42.42086799598271	53.89057249413509
BRPF3	7.228602102508348	7.595694545128943	7.706871019949328	11.748139874287375	11.055670109123959	11.440936861086932
ING4	10.722266750361289	9.774043469530108	9.620216371223089	14.189126254583647	16.94705065800311	15.475403978901387
