# Supplementary material for: Peptide-based Self-adaptive Implant Coating Sequentially Regulates Bone Regeneration to Enhance Interfacial Osseointegration
Source: Research Square preprint supplement (doi:10.21203/rs.3.rs-5132912/v1), 2024-10-01
Supplement: Supplementary file 733 [file 366_CENP-A containing nucleosome(GO_0043505).heatmap-data.xls]

id	S1	S2	S3	C1	C2	C3
CENPA	17.482163464131233	17.791993116293874	20.309976937667575	14.616231259241651	13.74659972383424	13.207285687703116
H4C2	1e-08	0.4485457923552017	1e-08	1e-08	1e-08	1e-08
H4C1	1e-08	0.2473856014055696	1e-08	1e-08	1e-08	0.0633807445437037
H4C3	0.4919577189010604	0.0613882863858265	0.428462128222812	0.3623729721632602	0.1832088662897309	0.4403787433481048
H4C4	1e-08	0.061692942844317	0.5536137714045196	1e-08	0.1227453975886535	0.5057877079964055
H4C11	0.2560962466387268	0.1278264981041632	0.1274529353619088	0.6287962811059142	1e-08	1e-08
H4C15	0.4210147190872383	0.0373587657269117	0.1489983209414952	0.2848480277785957	0.1858241692720787	0.2201421105225714
H4-16	0.3626994131036337	0.7241432702794103	0.1203378448684042	0.7718016466462642	0.8404484041446397	0.24736947880164
H4C14	1e-08	0.1883504034565132	0.2503999492211238	0.4941449584044457	0.0624575746442264	0.2573642048138275
H4C5	0.7858487167245398	1e-08	0.601689184342021	1.5436032832925282	0.4202242070723198	1.1131626196073798
H4C13	1e-08	1e-08	1e-08	1e-08	1e-08	0.0658373621616768
H2AC4	1e-08	1e-08	1e-08	1e-08	0.09386412992073499	1e-08
H4C12	0.5148394728034353	0.4497048253845433	0.2562232036216151	1.2008871520526645	0.4473704730330639	0.9875602924251521
H4C9	0.31366951898131207	0.06262532973868949	0.5619807300151672	0.8009629175522943	0.6853026588419409	0.6417898157070258
H4C8	0.5480396948851972	0.5470911284018039	1.2728153489748568	3.1696559321004	3.930703467071856	1.8688793708730256
H2AC8	2.0714321909748468	1.442683874773293	1.006927425165796	3.5956930388153285	4.640464174630614	4.928250548988187
H2BC11	1.4528126190984438	1.81287254701894	1.3944146715376335	5.605456768462932	5.668024001463553	3.5033701119032266
