# Supplementary material for: Peptide-based Self-adaptive Implant Coating Sequentially Regulates Bone Regeneration to Enhance Interfacial Osseointegration
Source: Research Square preprint supplement (doi:10.21203/rs.3.rs-5132912/v1), 2024-10-01
Supplement: Supplementary file 737 [file 367_RISC complex(GO_0016442).heatmap-data.xls]

id	S1	S2	S3	C1	C2	C3
PRKRA	13.60087293292137	14.765218364434224	13.537653387915892	13.388511526974941	13.185509147498992	12.750206217947735
XPO5	16.85310975361159	16.300818957500756	17.46401981759764	16.75404807560007	15.691151905210768	15.920221291820074
DDX6	26.721012619543142	27.434475002174946	27.361990204238285	24.797844503126584	24.813759764159652	29.73544470926238
DHX9	56.43477857944935	62.75048675764869	59.00839254216604	55.7036523687085	55.25196623041042	64.97641119929595
AGO1	4.015041451588544	4.326110018917572	3.6226039613371896	3.794700582231638	4.126912381297016	4.265930161238458
TARBP2	15.942204748757938	13.878538416758927	14.335152407905923	15.929774111335629	16.72763201965126	13.073097457871855
SND1	59.52078809937628	54.48038627468203	54.7199154585004	63.47781606021341	60.20797949737472	51.57601392837015
LIMD1	5.267033079739433	5.19212421985842	5.282639892123036	5.764431124153213	5.728778261455983	5.206687285555836
EIF4E	7.408556172129497	10.219859733299312	11.114854607259042	9.052383209543068	9.878448218973118	12.781964454228117
AGO4	3.5384828302328377	3.55045748742996	3.3235260171699643	4.261685428889203	3.985159407673255	4.6246865798504135
DCP2	1.752330420641022	2.0271554399826948	1.9055946495011646	2.305769659916371	2.216132793516308	3.684434826949908
AGO2	5.509098756063461	5.148330792276103	4.880504810816714	6.769449882203014	7.036790536552233	7.998656114886553
AGO3	0.6468115701234404	0.6901000262352669	0.6331782937769176	0.8309801255169178	0.852625086024174	1.117718007067361
TNRC6A	4.36863591480181	4.69125051368779	4.024605407620792	5.898486199395497	5.512688803339414	8.408426621835828
DICER1	1.084413319714783	1.0924907361916851	0.9491036282829597	1.515524587507274	1.5411054862472615	2.5783819623268283
