# Supplementary material for: Peptide-based Self-adaptive Implant Coating Sequentially Regulates Bone Regeneration to Enhance Interfacial Osseointegration
Source: Research Square preprint supplement (doi:10.21203/rs.3.rs-5132912/v1), 2024-10-01
Supplement: Supplementary file 741 [file 368_nucleosome(GO_0000786).heatmap-data.xls]

id	S1	S2	S3	C1	C2	C3
H2BC9	9.757294341978419	10.49380764543431	12.555768390944927	4.235528139180963	3.5333136670162397	4.301658694745401
MACROH2A2	1.2633153222595164	0.8235942770396605	1.2702742358313845	0.4937613054941938	0.4608670087412487	0.3428858471898509
H1-5	0.0624977741483467	0.0623896008061725	0.0933109032856634	1e-08	0.0310328777529657	1e-08
H2AC20	2.0670439766756346	1.0568973595171147	2.509068226891828	1.1883485903734443	0.5507391832596165	0.412616289944436
H2AZ1	430.4370766258313	478.8136695168592	476.0976063881149	316.14634893702373	303.45289058804025	308.10238680093505
H3-3B	175.77382955506508	185.9475855635937	188.4559004403793	126.56897181016372	124.616903085904	125.79400494609169
H1-10	137.11090127877816	130.21522453104382	137.3729413360353	100.87401964226743	103.27251197727543	78.65565881022594
CENPA	17.482163464131233	17.791993116293874	20.309976937667575	14.616231259241651	13.74659972383424	13.207285687703116
KDM1B	11.960200666016245	11.7936323387386	11.839966888399609	8.902823355194178	8.196028538606772	9.783027105038524
RUVBL2	87.5320438024513	80.35906957869692	85.92989325296384	71.2298530639085	72.01488800644688	52.888654885645295
H1-0	351.466144014062	341.9010861879024	356.4235225707265	270.3049097129332	269.6524306139486	271.96926256527246
H4C2	1e-08	0.4485457923552017	1e-08	1e-08	1e-08	1e-08
H1-6	1e-08	1e-08	0.0342397806946011	1e-08	1e-08	1e-08
H2AX	74.27804309685656	68.57421373620386	71.53479571188596	58.63067060925413	57.63828874914055	54.35105010622366
H3-5	1.028408012336934	1.8077580053653852	0.4673083346326002	0.373270184221132	0.8436817270254219	0.5489204111469068
MRGBP	31.828542033666288	31.059746433277986	32.01388700680071	24.860141479483328	25.694842385678054	25.54386394010307
MEAF6	13.868474439323997	14.075649405021105	15.307521907296762	11.38235529975828	11.51985696275709	11.85109905601399
H3C7	0.3024942490257026	0.0503284552151007	0.0501813743378365	0.0495145341822268	0.050067207569056	0.0515770449930545
H3C2	0.0974769532998676	0.3892329170255929	0.4366073404227424	0.2872036297184352	0.0484015669454279	0.1495835048330856
ACTL6A	43.85281143740594	55.56752523662471	54.766495234032114	41.11418471159103	41.078951060262945	45.74709454398153
RUVBL1	30.66537614658104	32.258362243655185	35.53571217540885	29.38445223694441	26.970890357745294	25.66988105515617
ACTR6	8.101052308451724	8.330357308159572	7.620980543600424	5.337021486420037	6.464519757839731	8.346334182744801
IRF4	1e-08	1e-08	0.0279897660966028	1e-08	1e-08	0.0047947136670245995
MORF4L2	142.95978875246178	160.83635118833686	154.6398481889884	121.61936024059113	122.32532353287077	146.7046314117945
ACTB	4407.849949629919	4078.6853602884253	4191.890244775874	3757.026175948939	3880.6547691106707	3316.945535142073
H4C1	1e-08	0.2473856014055696	1e-08	1e-08	1e-08	0.0633807445437037
H2AJ	118.82266446289947	116.77238329772321	112.47278690334376	108.49271146412121	105.87403407459307	89.95750327177318
H2AC15	0.20084967946061438	0.6516316131680984	0.2998741307607814	0.1479446165283471	0.2493265785394524	0.4109525146220794
H2BK1	0.130394559806891	0.2169481071750414	1e-08	0.1280637531728799	0.0431644002253292	0.0444660750725461
EP400	8.477428340365774	8.197725198845676	7.675515113336419	7.5874511365545185	7.2374132555376995	7.0762483372080505
H2AZ2	39.65215992772788	40.748211345910896	39.86667197365289	35.13160143877897	36.26104939387408	38.52802887945367
YEATS4	11.451714815077267	12.939210145764612	14.860247084212748	11.646908925032717	11.490490063539191	13.416423536238268
H2AB3	2.2334755221745475	1.4303156882281411	1.0066840296097976	1.572735454921764	1.7995387760945656	0.7760118461391551
MACROH2A1	15.995749589323	15.632035306037272	14.967952261949637	14.158867110743001	15.577634402243751	14.223247740253337
H2BU1	0.6007871791760483	0.2726124215817955	1.3047154827837508	0.6973295588996948	0.5423946503314404	0.78225170739466
VPS72	39.989336896827524	37.49297852402562	37.98842084698045	36.96518411275222	39.80821335064153	35.330302106147926
H2AC21	0.2505569417214908	1e-08	1e-08	1e-08	0.1990599343389431	1e-08
H3C4	0.21241245360866678	0.1855392035541772	0.8192723058098392	0.0782308467143498	0.5273602573158568	0.5704266208933342
H2AB2	0.1264231521985593	0.2944767672822644	0.0838903449674831	0.2897144340645354	0.167398964985541	0.0431117786743975
H2AB1	0.1272846386871355	0.5082572897872522	0.08446199972024279	0.4583678539628973	0.2106745892088048	0.043405555632996404
H2BC10	1e-08	1e-08	0.257153474552814	0.2029890137014112	1e-08	0.0528611205530475
H4C3	0.4919577189010604	0.0613882863858265	0.428462128222812	0.3623729721632602	0.1832088662897309	0.4403787433481048
H3C13	0.21241245360866678	1e-08	1e-08	0.0521539011428999	1e-08	0.1629790416838097
H2BC14	1e-08	1e-08	0.10593844582432159	1e-08	0.0528487185451147	0.0544424358260019
H2AC7	0.0488340472806199	1e-08	1e-08	1e-08	1e-08	0.0499589419344488
H4C4	1e-08	0.061692942844317	0.5536137714045196	1e-08	0.1227453975886535	0.5057877079964055
TRRAP	15.911757157268672	14.630147946681651	14.01973655037138	15.157686325699402	15.377477066074695	14.20314980934327
H1-4	0.0316459553788007	0.3475028960214196	0.2519908001691615	0.5283646530525301	0.06285438255175009	0.06474983283753219
DMAP1	17.713972350557377	17.86885157383307	16.76357160118594	18.21173761332263	19.40888541986705	15.4307711508325
SLF1	0.351965569096909	0.36237931942342677	0.3571987705603928	0.3117845498794399	0.28236746141971947	0.5041023563370154
H2BC6	0.26495063779910827	0.5818825021252282	0.10548764396975	0.7286009658388956	0.2104952916945845	0.1084215218577401
H4C11	0.2560962466387268	0.1278264981041632	0.1274529353619088	0.6287962811059142	1e-08	1e-08
HP1BP3	28.218734485512908	27.594556977909722	26.41172464439784	27.462047700305412	26.926128448244665	31.295646701043054
H4C15	0.4210147190872383	0.0373587657269117	0.1489983209414952	0.2848480277785957	0.1858241692720787	0.2201421105225714
KAT5	16.000709089763667	15.89867200853945	17.419428502890277	18.588061192814905	19.091364575398728	15.1720645420278
ZNHIT1	78.44932388293678	75.6333187852953	77.75380865243615	88.02147145332681	87.9374295374442	76.30636989800979
KAT6A	3.3311498652356124	3.4279290798722077	3.2353305023168506	3.699172102396239	3.431995039121833	3.8132260000550953
BRD8	17.43646136912835	18.174603764928513	18.936120767333698	19.5415238896169	20.270993399828534	20.11708653441177
H3-3A	108.28489539745624	123.02815419592875	124.57934028058891	130.30125367686827	132.2529721881025	129.03467946396432
H2BC7	0.1053080819370663	0.3679403134964445	0.6289114852530554	0.8791183484404674	0.3660303888452342	0.3232015569755043
MORF4L1	70.50757964876483	74.23158079111839	78.55771743170112	79.80007280328095	82.55839740165374	86.75358335716652
H2AC16	0.3100252259309069	0.412651494419249	1e-08	0.5074725192535283	0.20525474526235418	0.3171666733182853
GLYR1	22.775207283963162	24.280483275346732	23.789475892451865	27.24960857009013	26.60913997677104	25.664083401124426
H4-16	0.3626994131036337	0.7241432702794103	0.1203378448684042	0.7718016466462642	0.8404484041446397	0.24736947880164
H4C14	1e-08	0.1883504034565132	0.2503999492211238	0.4941449584044457	0.0624575746442264	0.2573642048138275
TGM2	866.7216856505914	812.2458845597166	832.8235631679689	1023.1263150271805	1037.0780727408116	858.1963612425877
ING3	1.8578812934925732	2.7306301160920343	2.879000268126128	2.622632947883404	2.54432395919112	3.9897607334296703
SPHK2	2.622241240061304	2.286047948874765	2.1789805196919665	2.9832323997956816	3.205063946616923	2.2638608060672243
MBTD1	3.067143153641077	2.9327916036135284	2.49143608346139	3.0738722625747137	2.9136778180742597	4.49229648314309
H2AC17	1.176228464418218	1.0720889025286544	0.5599292375396384	0.8538459526742117	1.9299002826207798	1.2556413382908707
H3C1	0.588315577238965	0.0489414508194089	0.2927904901128889	0.7703992208982697	0.4381865462047699	0.4012449751428177
H3C11	1e-08	1e-08	0.0493816713205005	0.1949018023985662	0.049269323942457505	1e-08
H2BC18	0.2340729330556032	0.1168339006779123	1e-08	0.2758666447295496	0.06973646375689939	0.526822581714771
H4C5	0.7858487167245398	1e-08	0.601689184342021	1.5436032832925282	0.4202242070723198	1.1131626196073798
H4C13	1e-08	1e-08	1e-08	1e-08	1e-08	0.0658373621616768
H2AC4	1e-08	1e-08	1e-08	1e-08	0.09386412992073499	1e-08
MPHOSPH8	4.184100324203518	5.472536836198431	4.663276775238745	6.010214425307788	5.189731109425454	7.151606842435802
H1-3	0.032094544810716705	1e-08	1e-08	0.09456254200780949	0.2231087331878811	1e-08
H3C12	1e-08	1e-08	0.0484171857478344	0.1910951267657817	1e-08	0.1492913495697397
SRCAP	7.367091877748799	6.542139827755146	6.776752715148968	10.298142583657032	9.634638725553753	9.247132408869906
H2BC12L	1e-08	1e-08	1e-08	0.1571317548352466	1e-08	0.0545590148962932
H4C12	0.5148394728034353	0.4497048253845433	0.2562232036216151	1.2008871520526645	0.4473704730330639	0.9875602924251521
H2BC13	0.276112637639869	0.4410155654103725	0.10993169063366409	0.5965896428297577	0.6032486831491142	0.3954620654456374
H2AW	12.550347591119332	12.626124032531912	13.609973177077556	17.74561712770083	20.4655069567176	18.43484589381164
H4C9	0.31366951898131207	0.06262532973868949	0.5619807300151672	0.8009629175522943	0.6853026588419409	0.6417898157070258
EPC1	3.57742561387508	3.7429761751297184	3.832767385249949	5.203129463165992	5.075279887103784	6.600120995448066
H2AC18	0.1869070194792959	0.18658351421208058	0.232547795955828	0.688372663265105	1.392112332651802	0.3824248548265504
EPC2	2.912300279748944	3.1886072664669043	2.8052548383200357	4.4481874728855235	4.694249561866721	6.955271206949031
H2BC17	0.5333053421866422	0.6920969589751108	0.3715785065315607	0.8904132307330644	1.5358943833924983	1.0366211030295707
H2BC15	0.6892627133150235	0.9632975942462264	0.503109850981188	2.391862135717829	1.8709613007078607	1.1752331874247655
H2AC11	2.3743445812301434	1.4624854180152793	2.061609245899679	4.316501471062364	2.909787727542786	5.426573651155652
SHPRH	0.5589430983713087	0.5128563351022065	0.4603717571869589	0.8197288177003881	0.7824972151501093	1.1713799638922255
H2AC19	0.09327850817646509	0.1862341069008221	0.1392673919263554	0.824500289079328	0.2779010841473447	0.7634173968634883
H4C8	0.5480396948851972	0.5470911284018039	1.2728153489748568	3.1696559321004	3.930703467071856	1.8688793708730256
KAT6B	2.0368282568665492	2.304779242419845	1.726294855605241	4.164361828107928	3.910462913079924	4.851666359275352
H2BC8	1.018624100515999	0.5592735709383584	1.2166671993443565	2.501040393028636	3.995751446257629	4.585187873431626
H3C8	0.502124183651536	0.5012550893600757	0.09995805025359379	1.4301312064406888	1.246632852697262	1.386964713099518
H3C10	1.5886134449930076	1.2789224347047194	1.2241774906366056	3.6237296316326018	2.595458807437856	3.2504144704264886
H2AC8	2.0714321909748468	1.442683874773293	1.006927425165796	3.5956930388153285	4.640464174630614	4.928250548988187
H2BC11	1.4528126190984438	1.81287254701894	1.3944146715376335	5.605456768462932	5.668024001463553	3.5033701119032266
H1-2	14.41171938421087	15.271068572764197	15.022968730137935	43.165014620623644	40.63552383289402	33.0426052243192
H2BC21	3.516314187211548	3.44315360548921	4.023850472150965	9.447522617298217	9.57521647170723	10.562809800564995
H2BC4	0.6364931092634805	1.3015276257893604	0.5517881695532268	3.428054206886571	3.77216916567686	4.127480936472212
H3C6	0.4243135339271646	0.1104989074944877	0.2019892943050399	1.277364701625492	1.3099433324715763	1.3777563329033564
H2AC13	0.4528247193293851	0.5022677258840353	0.3505599249095734	1.3341913706920034	1.9486760268998655	2.05891356851062
H2AC6	12.284724301633418	11.880228295534526	11.702216822732868	42.88778267065175	40.7930933295401	45.8524810074092
H2BC12	29.790964962554984	26.544027725488142	25.544181408379497	101.56349981404948	102.94809262773136	102.54817066732927
H2BC5	2.9810960130851183	4.143708666043292	4.563538902304981	15.713809369261375	15.083501871580692	15.750688732606244
