# Supplementary material for: Peptide-based Self-adaptive Implant Coating Sequentially Regulates Bone Regeneration to Enhance Interfacial Osseointegration
Source: Research Square preprint supplement (doi:10.21203/rs.3.rs-5132912/v1), 2024-10-01
Supplement: Supplementary file 745 [file 3_cytosolic small ribosomal subunit(GO_0022627).heatmap-data.xls]

id	S1	S2	S3	C1	C2	C3
RPSAP58	23.532797015282227	22.06662983964921	20.999540512840333	15.861064563885899	17.104378833209285	14.95903646935891
RPS18	2939.0138233683697	3050.765872392649	2941.9242564167657	2442.007629866757	2451.6048053152244	1732.668579370226
RPSA	1887.0930684367208	1777.1666838693982	1874.2220822281788	1488.428117526128	1457.0528960748425	1193.6771953446587
FAU	552.8399060086582	510.95367171981246	532.5353490100554	440.9115725053538	443.68224596485163	328.65967166105804
RPS15	1096.5985947192135	1042.3108866976677	1091.4634251280806	885.3609418539972	944.1035735222628	658.7096651675139
RPS2	2908.5769644602947	2703.40814573526	2811.979393656592	2325.347298211641	2352.4802328514124	1925.7043023725523
RPS14	349.3495682913157	366.2210762458837	356.97854594729324	301.5961308721416	288.75979695809485	260.3219770661293
RPS6	576.8437718053892	685.1193968656604	703.1082138607559	541.1076685565432	523.8414948210308	500.573170928596
RPS12	1179.4643281440765	1390.9021262254064	1210.6981427211465	1032.3360913202582	1037.4174170082115	967.6975590450152
RPS4X	882.9405974247893	1005.2850850853604	991.684666763844	806.5219964322978	798.6607265574993	771.3032062121655
RPS3A	398.1563752807231	431.9025892160423	435.1922923424055	351.71143721704027	336.3890728099495	370.042454535637
RPS20	297.0031915623664	330.124774422599	322.84361733985946	279.9909387538041	282.0251722462869	234.77223958878452
RPS19	310.40336481947264	311.042641255122	316.5174644885449	287.62689212103203	288.26058598925187	213.9642456520161
RPS8	1265.595589449008	1338.6948533028756	1361.993823658698	1167.1087588096873	1112.6758945716695	1095.5993773324635
RPS13	577.643649378727	655.0519319549082	636.2505658782869	578.086297832922	526.0145280457991	492.27275319376616
RPS9	634.5940465475151	582.993504704871	613.8104158789223	562.9665656029438	564.927120833178	438.8866892332903
RPS21	234.42616038585084	258.7637010834403	237.54717392978696	214.6409610195732	229.802747397698	181.72113295996084
RPS5	1068.6785360168044	989.0881576739692	964.2516428829756	903.3429791905464	899.9078091162131	790.2633301735809
RPS3	642.5839570971215	641.7740545046755	618.9634621509825	581.8799834440064	553.7993969748265	498.16528730789736
RPS15A	202.27266613014288	209.05508619578106	209.8957315410353	189.78564247587425	183.12444550121344	161.3519293349764
RPS17	1964.2060498825458	2007.3721076751035	2076.6364795603986	1816.8697160824079	1888.6430344472383	1521.2249074474428
UBA52	121.7287111574003	121.45179972284271	124.73427423723084	104.87670169138578	112.95225235742936	106.77760022790191
RPS7	538.1530922374027	627.6699669254101	621.2976655975999	564.2548007456487	507.63870312623493	521.8681365011582
RPS25	1284.3533795104097	1401.911866436572	1435.7434825719051	1219.0080147628962	1191.136361978909	1320.1104731909259
RACK1	1508.1942627033993	1513.5877270979815	1555.3948056312686	1431.0489721150475	1471.7770086565565	1336.8011007119826
RPS24	263.69241649150644	277.5772507868852	281.2231015128385	248.68852543257	254.2513099094724	270.9905880278701
RPS16	1300.22440402533	1337.732985390323	1343.0086922070786	1191.0690147368612	1188.4879637437186	1370.4292422761566
RPS27L	4.235133891281132	4.773064088761487	4.450766720185222	4.199463760961546	4.132993906349438	4.353540716903102
RPS27A	426.96841843667727	512.1623898969508	508.61486055533896	429.4539624940777	424.1293350882559	520.7918900674688
RPS27	998.2613763439446	982.7826814287608	1027.919191601943	958.5121637765568	994.6217442654536	915.3699639954496
RPS11	2005.3812463401127	1894.6077326396367	2006.3131255886772	2023.791333371021	2069.6030181438637	1631.1041990011363
RPS28	95.82009179204174	112.21661532832125	103.44529820928307	104.25919682878775	113.2148081358677	90.34528176297671
RPS26	143.1839675292662	147.75592708733316	153.34755857785015	139.42299720231438	142.64979041716882	162.3731023406344
RPS23	232.0441183182433	239.9299054576137	250.86123875015028	233.97375832668084	223.99817860320306	265.2971374818666
EIF2A	13.173555634283606	16.554051142481413	14.50592752349959	14.599427313204453	13.185868760959037	16.517456540603302
RPS29	26.768594527443266	28.98488713751053	28.817239482081572	29.12829720883385	30.82050111055507	27.78417325343731
DHX29	5.037686815220932	6.3738629564037845	5.755193056333206	5.714753575582462	5.289186860915492	8.543072009895663
RPS10	1.6019223737077155	2.413810877598034	2.0758276614799724	2.820044451592118	3.421825614731747	2.84474890121886
