# Supplementary material for: Peptide-based Self-adaptive Implant Coating Sequentially Regulates Bone Regeneration to Enhance Interfacial Osseointegration
Source: Research Square preprint supplement (doi:10.21203/rs.3.rs-5132912/v1), 2024-10-01
Supplement: Supplementary file 749 [file 4_TIM23 mitochondrial import inner membrane translocase com...(GO_0005744).heatmap-data.xls]

id	S1	S2	S3	C1	C2	C3
TIMM17B	50.580520042092324	51.57787175413159	45.86074887834885	37.4018311547325	37.30215591811782	27.656356384693904
TIMM10	20.00296757703499	21.58454315514896	20.03047388438966	15.172441455860563	16.078079773700875	11.702409363976976
SLC25A6	2.3515053062073856	2.073282218330413	2.391828512828929	1.6014587418207484	1.8238814222020423	1.3872125307711543
GRPEL2	5.780273631700848	6.722703456446356	5.932236182025223	4.4296038310703	3.869945291552862	5.393700519669192
TIMM44	16.999968343423852	17.28081646705303	18.682987553264226	15.209636737150836	13.90319623391849	11.474560990929035
DNAJC15	2.1202444091592407	2.156572875365338	2.0439201466775883	1.7019480991519524	1.7043655466596634	1.509819347265513
DNAJC19	10.667748971385151	13.141078301057785	11.117841432338134	8.614473717192958	9.735406788374535	9.030370668677564
HSPA9	75.4964902064353	80.04583793103247	81.42177043745734	60.56725881707284	60.56375599111761	68.30862983936403
TIMM21	7.021916487466937	7.841971975733683	8.72861791063825	5.52656673420537	6.758443223275673	7.634696009934236
GRPEL1	15.010806290426983	16.690414898231673	16.57623058883494	13.792846492942337	14.944331915533068	13.195711266594687
PAM16	0.1869070194792959	0.23322939026510078	0.3720764675293248	0.27534907130604197	0.2784224745303604	0.047803115603318805
TIMM23	54.9173630775772	58.060670708206594	58.76591986355989	58.0055577391333	52.66715769752443	49.652041362565825
ROMO1	192.0886329167773	191.863555448998	196.49634972319853	199.11533342587393	207.4810620120681	136.4202549892751
TIMM50	14.086851243080707	14.207692656597033	13.982759700116043	14.139848026887375	13.869081654362812	12.030122492462937
TIMM23B	0.9882286842679369	0.9067995796190933	0.9736994930955286	1.0882081939712331	0.7831352614348621	0.9803564458759987
TIMM17A	32.105271901453406	33.978410989554995	35.21624746205886	35.32642237143383	36.48521097257133	32.65951633187471
