# Supplementary material for: Peptide-based Self-adaptive Implant Coating Sequentially Regulates Bone Regeneration to Enhance Interfacial Osseointegration
Source: Research Square preprint supplement (doi:10.21203/rs.3.rs-5132912/v1), 2024-10-01
Supplement: Supplementary file 753 [file 5_manchette(GO_0002177).heatmap-data.xls]

id	S1	S2	S3	C1	C2	C3
SPAG17	0.0030758848935551	0.0030705610604248	0.0030615876192282	1e-08	1e-08	1e-08
CFAP221	0.007480219945372	0.018668167333127903	0.0037227302256932	1e-08	1e-08	1e-08
RIMBP3C	0.0042970008580255	1e-08	0.0042770275953918	1e-08	1e-08	1e-08
CEP131	12.003219746682323	11.553557106706696	11.927689471513235	9.445210876894691	9.242128301813182	6.93100629151092
RAN	139.2444184634043	154.01084108037423	155.41099446143753	134.7082098576467	134.39265740127098	128.78000770841902
STRBP	4.933114446957624	5.717495114788246	4.897753509778938	4.2807146104217235	4.172222956315236	5.887447947042904
C9orf24	0.0522672901954169	0.0894459770919253	0.0483083178665247	0.0696662255560457	0.0333681347776979	0.06492939687927919
RIMBP3	0.057113036401904405	0.085521269731606	0.0527870242141828	0.0400658166273874	0.09317994428003509	0.0417347442941341
IFT20	13.528837004779161	14.38531944307869	12.323386648408492	13.367535947578045	13.313176900387116	13.861444902528447
RIMBP3B	0.0043480126210049	0.021702394720897102	0.025966763473698903	0.017081137755600603	0.0388615254315682	0.0044481690933255
IQCG	1.4588235122326432	2.289624903576801	2.000592039859106	1.6158202228350382	1.8270209670448438	2.6034570096689365
SNAPIN	39.828709737854794	38.71868148999773	41.00292764471247	43.33572371795379	44.60852527300763	39.60303808752837
CCDC38	1e-08	1e-08	0.0070949138302493	0.0140012549605152	1e-08	1e-08
PACRG	0.0026416475703347	0.006153162437909	0.0070116332450548	0.002594428216591	0.0166147291480398	0.0072066442204975
MEIG1	0.3609472420741476	0.032756600166350104	0.0326608716375379	0.09668054338347849	0.3258655646655294	0.4028309236216429
PPP1R42	1e-08	1e-08	0.01134536193725	1e-08	0.0113195503199604	0.0233217997359898
SPEF2	0.2996928808001947	0.40476503886850057	0.4737703427114239	0.5345658577850784	0.3567077504579305	0.7416925590427513
LRGUK	0.0459977569015025	0.0350427952321522	0.0433742692167234	0.039231396304673705	0.0589028816576704	0.0582024692208378
LZTFL1	3.111272769103484	3.747266095050728	3.2982295567791544	4.163645471053181	3.7077185458817583	5.672363323849186
