# Supplementary material for: Peptide-based Self-adaptive Implant Coating Sequentially Regulates Bone Regeneration to Enhance Interfacial Osseointegration
Source: Research Square preprint supplement (doi:10.21203/rs.3.rs-5132912/v1), 2024-10-01
Supplement: Supplementary file 761 [file 7_U4_U6 x U5 tri-snRNP complex(GO_0046540).heatmap-data.xls]

id	S1	S2	S3	C1	C2	C3
PPIH	9.13021478056145	9.865695671753109	10.278187255190337	5.850044193622977	6.413597463319008	5.8430534477022675
LSM4	93.21970645698063	95.87432951302983	98.02364100572849	71.67233187941207	73.70608407825074	58.82312412817027
PRPF4	23.803726947000122	23.51720327056553	24.28351177479889	16.82001143085966	18.62353245669567	17.642013452724658
TXNL4B	7.582671073024465	7.984316400181588	7.8575934829215806	6.175860671699643	6.030551391240422	5.6320401423214586
LSM2	56.5160070013021	56.18637122725835	56.831155446302006	47.69449031849832	46.554907810196504	35.872609317896575
SNRPF	116.81274582373075	123.21116004810139	117.037596380553	100.33000963371943	94.00803107034801	80.15755889827655
SNRPE	27.37699418495492	28.2875242503796	29.203386266552577	19.84801120379328	20.6615311847412	26.996196942354118
SNRPD1	14.605880583974475	16.11593894521654	15.65551140141836	12.063931498403473	11.20070612734255	14.103165853059659
LSM3	14.969907675222261	15.758182317918132	15.254567072410312	13.071156314884197	12.745805780189277	12.819173405147804
SART1	34.20417362196757	33.109044663679235	34.767540590580076	32.173922937362995	31.677619536860472	22.31498960738716
RBM42	53.2403567182986	49.54817585460277	54.66310589071354	48.90589353386872	48.2238843371135	36.03509415938501
LSM5	19.26266100977355	18.7235467414154	20.409143201339273	15.757152996766017	16.209270201202145	18.557939760009916
SNRPD2	294.4769717167714	308.6013908686165	295.9323155209498	253.78721601111113	271.3868150120891	253.52735076759984
LSM6	5.111906719258744	5.840063691838125	7.106660348810103	5.653834068817395	4.937358381005057	5.191417278520422
PRPF6	98.57519846690228	91.31390267448404	93.42268058287179	89.28325099445523	88.62390206156651	73.5773572356383
LSM8	4.400268543648111	4.476972056015764	4.559972158984682	3.430823966818221	3.716769794395233	4.84316022839335
SNRNP27	17.040508808447914	18.33700126263789	17.918092502896844	14.761930152861234	14.041512458900328	18.917081057852574
USP39	31.72824790394073	28.439880184810793	30.36160837811673	27.338366762054488	28.77880756685577	25.014955928871856
SNRPG	72.570966963355	75.46850762905827	80.75849997706311	66.65746219665252	72.0379775656199	67.09430772472678
SNRNP40	42.855723042476704	42.76615225701522	44.1607813652806	40.24191012243053	39.40465157440836	38.463118764585154
SNRPA	84.76013334672899	85.95680682173592	83.88084229666651	78.1116628368362	83.3026423528253	70.77071974489427
SNRPB	290.8770996853689	282.53812367751374	289.8687089485769	282.7840373480452	291.2208058627803	222.22351640496393
PRPF18	4.926191168418049	6.7699416442701	5.956785972310701	5.030634101731304	5.216550183580115	6.336344294277897
SNU13	32.64075888244816	36.25784122424386	36.73120767933493	34.15020279931712	34.45680021140376	30.96286252183498
PRPF8	94.06528370892849	89.56956087292178	89.94343157194785	90.13002624397741	90.45437996606199	80.52122121455785
ZMAT2	52.94001832674049	63.54044440150322	58.345456314292	54.71855199416665	52.36581374931518	60.80979193422699
CD2BP2	22.600849772181242	22.05589407720033	22.85506603436017	24.460174956020065	23.444146674600237	18.065417136262916
EFTUD2	49.48884793034252	46.55351327539485	46.47523669529762	48.39694361611893	50.37816579175403	42.63963088046777
PRPF31	69.14394236162573	68.19249133752479	72.43796674516055	71.85895620269876	76.75953073239306	60.894009821914864
SNRPD3	24.740089762498275	27.6884860094122	26.79936776934609	27.275988517318968	27.37349635108485	24.53075808596091
LSM7	54.82001120884215	61.76825765334221	62.851803451041604	63.09062122345968	65.47640592323437	50.88593195626371
SNRNP200	67.39402613014633	65.74292725262846	64.93743378920293	68.1444017709305	69.62700546916739	62.759085314142524
DDX23	45.27482187690254	45.71569483260047	45.802886189690994	48.22921473771768	48.06109600373226	43.16414895370829
TXNL4A	19.969280961536843	21.599246511479645	21.06193453637785	23.478908639110124	21.703970537064958	22.67662998077733
PRPF3	13.205338755644306	14.613209255199362	14.46283949621814	15.625120813375107	15.298237895951965	17.981960852855376
SNRPN	0.224250173010323	0.061053288970351303	0.1623329583190696	0.3603954935157117	0.1754606063375049	0.278079740276332
