# Supplementary material for: Peptide-based Self-adaptive Implant Coating Sequentially Regulates Bone Regeneration to Enhance Interfacial Osseointegration
Source: Research Square preprint supplement (doi:10.21203/rs.3.rs-5132912/v1), 2024-10-01
Supplement: Supplementary file 765 [file 8_proteasome accessory complex(GO_0022624).heatmap-data.xls]

id	S1	S2	S3	C1	C2	C3
PSMD14	47.93526662363013	56.22962404452748	55.22684914482667	37.853174384025934	36.00282015140289	47.29966295105233
PSMD6	37.23071051835978	45.046943191035055	43.0902962992793	31.95079090319083	32.35799977387112	35.24863171013062
PSMC1	24.41570568678034	26.9971218402992	27.218149410808522	20.637630392115064	19.812324564020322	22.152349539945828
PSMD8	149.6782544742022	140.24734080722808	147.7414076274027	122.25253447340857	122.44398217557266	104.70246830882539
PSMC3	184.9194345632348	178.56913289623262	179.14177349989598	155.33052611502993	158.41157962129577	136.0441300722304
PSMD13	87.76244806992608	87.29939715448297	87.10336480328179	75.6836879240263	77.04434649186365	67.46331505065895
PSMD4	159.67185741788492	155.44523933738307	155.14029789539856	141.53010865850763	140.80042073989412	119.27958338093295
PSMC2	31.034715291141655	38.12211964559828	35.89471428803071	30.80762845447325	28.531782970597497	32.249657838451576
PSMD2	164.1294517700622	153.01241467669604	155.75224689654215	145.9992019575167	145.6783581842362	123.79882927515796
PSMC4	73.94932141268475	68.17983570749679	73.18159501764592	69.46187652432492	68.02333841942097	54.79304250768413
PSMD1	33.538833359995486	37.78717783737307	34.35047666065764	31.06385729133125	29.38280789957061	34.23490616641063
PSMD3	79.66930867422074	73.66035611924464	75.77741282309518	74.21219358166962	72.59832263022096	61.56746103781536
PSMD5	20.706585098988345	20.63397780744007	21.28488357472444	18.802719526328353	18.873600910832092	20.36967952481686
PSMD11	29.264267236189905	29.08839650858041	27.82976832421033	26.78854215057952	25.935287462709486	28.077649451960614
PSMC5	101.95819795534183	103.43720192156975	100.23879408125524	99.89878957464731	96.83674888110612	90.25631449971023
PSMC6	16.14898855957276	16.835431112406305	17.03486602968809	13.857892565484397	13.663934038461285	19.77406758534477
PSMD12	11.200454761708677	13.52244589552356	12.894347877796793	11.380911417445887	10.708506484476592	14.767888199840925
