# Supplementary material for: Peptide-based Self-adaptive Implant Coating Sequentially Regulates Bone Regeneration to Enhance Interfacial Osseointegration
Source: Research Square preprint supplement (doi:10.21203/rs.3.rs-5132912/v1), 2024-10-01
Supplement: Supplementary file 769 [file 9_mitochondrial matrix(GO_0005759).heatmap-data.xls]

id	S1	S2	S3	C1	C2	C3
PDE2A	0.311771664660332	0.2282368314469912	0.3465267775471969	0.051033131105821104	0.0258013824171851	0.0691065651273515
PCK2	31.716537079099393	30.017396197580062	31.84631228003379	10.518656712026521	10.312083159151232	7.578594409934717
ALDH1L2	2.724782221717633	2.6625145631155362	2.2892924367826	0.7748106198885498	0.71716625666046	0.9809188051456846
MTHFD2	53.72063999559893	55.0316708307385	57.96744453470982	20.233377162095206	18.503804804277046	20.54669695444343
PRODH	0.5366173778364705	0.7457625311129878	0.8064211070353305	0.2790134124260844	0.20898349626205048	0.1291713929483849
OGDHL	0.4169019439895722	0.3317379664517919	0.4269920460954099	0.1364832763169484	0.1800087115947138	0.1421684407596034
NT5M	0.9370936651279569	0.7681515687525956	0.8644887570326106	0.4339829243068717	0.3102052775324751	0.38191304427405237
GARS1	139.69221443003605	139.23785332589335	133.31087977078255	73.88063994918697	67.96571817678375	73.03680124224273
GPT2	18.259885681485322	18.261313046442332	19.327759180451764	10.805591023576179	10.296370188550426	9.749293086880225
NUDT2	22.81227408244825	24.93268325486105	24.22779016325067	15.08261968870737	15.227614297650724	12.318485663185351
NAT8L	1.2748780308167134	1.178247418472019	0.9660409908392237	0.6866297558427032	0.7514709463006799	0.4038952060882789
HAX1	104.06801954722307	94.96528333010485	99.20308215253509	61.492306366631134	65.43480243362447	55.4152221481463
RAD51	7.236809716504802	6.6383049882673335	7.5203448512744195	4.628491026721641	5.013260532109911	3.4401014140114943
IDH2	17.26059275799546	16.513537168847087	16.5661229120283	11.651148431033224	10.217078221616116	9.319077553793148
SDHAF4	4.926334759847157	3.5097177389563634	4.065241964928914	2.7086077174629146	2.4670474154906286	2.6060572286600503
SHMT2	73.31020444711282	65.10657003373812	68.771430644406	46.96353590635853	44.112925693503314	37.956648726626966
NUDT1	33.37638778616107	35.37268892360561	34.817144348631615	21.57324443664001	23.48592072375065	20.284827287504445
ABAT	0.1713390892057133	0.14253544288601	0.1339978153129257	0.10817768789394619	0.0891286427895988	0.050081691152961
DMGDH	0.0114850729527858	1e-08	0.017147527165938103	1e-08	1e-08	1e-08
MIPEP	4.936767489092915	4.77816469279452	4.449212398924257	3.3488994387594175	3.0327234856219443	2.784242392013885
ACSM3	0.1137808379787033	0.0631021722747709	0.1069601870835409	0.06828983852949759	0.0251098532478311	0.0388006018069577
AMT	1.0600678698472086	0.9461848608541517	0.8192855397300067	0.6491683986525105	0.7554957193369728	0.4848293043863891
LIAS	1.8838753545520308	2.373782858185604	2.4783037723731547	1.4102930907279485	1.4129516760694405	1.7924963618189191
ECI1	31.11930393946103	32.91320015123305	31.96163312795469	23.892088610226633	24.700371195578033	17.465072412804048
TARS2	18.265746536395568	17.934914061758498	17.692646043741135	13.21134905998385	13.349791945334886	10.834638399547545
MECR	10.643250710924843	8.95162758080995	9.683790623689857	6.876384462551985	7.437360448644463	6.102814414828224
NADK2	4.961944136850796	5.357711405344884	4.434912690020303	2.839966109447552	3.380073047601937	4.138116285365497
PYROXD2	0.22499452731385108	0.2322620905050444	0.1628717906082579	0.1632185062007292	0.1599621620115144	0.1124729981246754
OXCT1	16.21256143004043	16.985713033384204	18.257284026650957	11.363006417744574	11.483707337005438	13.409031832852214
GLUD1	40.9766558423349	44.20955761537604	43.79195856354085	30.0566731016322	29.573689163542085	31.34819652209449
ALDH2	2.0109755521112533	1.9112807518837895	1.7967983187693384	1.4326637449410349	1.3089631909592638	1.313792945496128
MRPL58	23.65554629891784	20.12118383067737	20.28856369855243	17.050705903028586	15.864449376949743	12.623291087196097
CCNB1	134.38337629171315	140.10595793961758	147.29588224644016	107.90686346087513	98.31110030908911	95.47425202763603
ABHD10	14.033676914702133	15.810461192767125	14.514594246435212	10.558611749208065	10.15003061620834	11.331424523182815
COQ3	5.527976052191902	5.106586541157941	6.159269693397024	4.063190452997182	4.389469176903753	3.762170028650972
TFB1M	2.5940811676024733	2.7346663790648944	2.3216512626646524	1.7841119681342132	1.7462971172167792	2.051705118415178
MCEE	3.6823950785307225	3.6198989939475257	2.9937771614326922	2.346630789245717	3.0707127818989903	1.9842605232880988
SARDH	0.017062370593594	0.1135521997065985	0.0226440784931639	0.0111715902448139	1e-08	0.0058184743266884
CDK1	22.85063034352557	26.723636046009087	24.382014056590055	17.077597197796745	15.184119797946773	22.26986131009268
GSR	12.871325960087733	14.57809697592159	14.976705933084933	10.52093880517343	11.412812745253513	9.48956246017234
PYCR1	60.49071553282207	56.69338543010046	57.58746139555304	43.42247012131283	45.24790434315156	40.80691358928227
ACADVL	160.1482517047901	152.27771135067968	152.40410008998802	124.11447972073107	122.89633188819299	98.42178291681924
HMGCL	39.071273417200736	38.148512694362886	36.884389528493	31.56453150085137	28.37228362401512	25.13825264623902
ALDH1B1	20.78110830079014	20.657371724690783	20.00033353791676	15.291534283057473	15.811465232539941	14.726501476980305
ISCA2	9.27316932871548	9.83508688598652	10.88206509431453	7.79010609509434	6.736705359158046	8.084985007946514
DLST	50.3351829398563	48.932455899668895	49.61934390556043	39.53646529126947	38.73576341995099	33.988124246214106
LONP1	30.69679728024069	27.351371464907412	29.529629862146088	23.53473178285865	25.467417364384232	17.136815134348304
BLOC1S1	3.1464065757139665	2.964005134073671	3.440548641077435	2.698453473795808	2.6845639451351158	1.8587922995895478
PPIF	43.40238606695846	41.15814781236446	46.82356880407938	34.7512140165688	37.4503081381531	27.465022404822303
ME2	7.718979068544147	8.082778404957219	8.141505463798637	5.3248481933546055	5.562298787743317	7.2930304513443325
ACADL	0.0076116722900721	0.0075984977555806	0.0454577006776734	1e-08	0.0075590551097535	1e-08
BOLA3	27.77732835075481	33.14966925834633	37.83204704334937	25.07718837808183	27.184233010827647	23.000012079497353
TRAP1	42.503548863604045	38.91861038682987	43.28152549040438	34.545852688462965	35.08285375880839	25.857843175774583
TIMM44	16.999968343423852	17.28081646705303	18.682987553264226	15.209636737150836	13.90319623391849	11.474560990929035
SIRT5	1.2143176691006818	1.123517162548306	1.1025458715294723	1.0820769608763778	0.8117923735813267	0.7090140350989569
MTRES1	4.0291915990329334	3.2672383534561242	4.399828470837768	3.009497974562678	2.822951130736535	3.1481974171362648
DTYMK	67.52626042908955	61.32826705742941	64.69630310844417	54.39438239827922	54.91921719305692	40.698657372905444
DECR1	11.649506132792428	12.214993109362615	13.138623853988921	10.515268712257084	9.280150237597901	8.981259823577435
HARS2	15.58035000530665	15.758267181352027	16.653704315955256	11.989078951653692	13.478749743519135	11.88596560767565
SSBP1	65.61739422524568	76.4538814582612	75.95050082940598	58.24311562116127	53.530400197127456	58.4824165768564
DHRS2	0.2991345041521122	0.12522638550227688	0.5858834787936331	0.2084943334453473	0.143741944903799	0.16782021142257708
ATG4D	7.712863148602028	6.592632372745981	5.554615491489334	5.432935149673732	5.106364267742649	5.011047086908369
GCSH	13.46159349357668	12.973447054359905	11.769790240970472	8.55066739906197	10.551895922823006	11.07220137249199
ACSM1	1e-08	0.0047007571991415	1e-08	1e-08	1e-08	1e-08
LRRK2	1e-08	0.0026273218394018	1e-08	1e-08	1e-08	1e-08
PDP1	21.895230216491424	23.91193311290709	24.678429894313275	17.54990131656148	16.66308609054744	21.86639403022646
POLRMT	19.02711632355421	17.722222315830727	17.167055336759613	15.532727138168857	15.321275448375014	12.168399040584475
NDUFAB1	38.75956908215882	43.25967511254768	42.844628161542985	35.21885475116472	34.07613624939983	30.39028328841727
GLRX2	6.221494362692837	6.887907939422934	7.6587306023796335	4.777824065603919	5.851277412436232	5.968245645219647
HSPA9	75.4964902064353	80.04583793103247	81.42177043745734	60.56725881707284	60.56375599111761	68.30862983936403
LIPT1	2.1668049370862343	2.639441567189668	2.6445657067765924	1.7607272588331375	1.8059972028922988	2.401443853684901
SUCLG1	62.43989221296215	63.34980100664296	64.27727007744954	56.43174220829825	48.23946890685401	48.14939582713812
PARS2	2.6110457129879867	2.859792146980642	2.9461317227375017	2.273675015593546	2.2465636170502243	2.2494242458261193
CHPF	23.15390607039022	21.561352780427146	22.21971186432236	19.477684030368206	19.890017568183872	14.550633583778675
OXCT2	0.1773108901590966	0.14977261202566108	0.2986698170227863	0.053581992357108504	0.2031752202884475	0.1255813339754218
HSD17B8	0.4588500225241466	0.2035803738588311	0.7865684987099583	0.3254680491998576	0.3544163236004008	0.026078879280009102
RARS2	12.950539313070596	13.68751243679113	13.038082964001415	10.763205871521619	9.704109532373883	11.724035134413267
PDSS1	1.7701736022451777	1.693480151759055	1.878184944044328	1.4427398451675209	1.2818290020567307	1.6097330192205435
COQ5	11.119625052409576	11.671626375899486	11.637516976380807	9.056012561816305	9.53164405811796	9.35340777316342
TMLHE	3.126028321191958	2.6471053102350903	2.696252315619656	2.536943349972709	2.213388326579701	2.1456662078363458
TP53	10.303805580047344	11.138647899132977	10.80181948196742	9.536819122527676	8.446788109913912	8.370375573457661
ALDH5A1	4.807649583518367	4.207827948922104	4.61748144240315	3.4490266126399662	3.7458592274286286	3.9672416938854904
THEM4	2.738365650877025	2.611452762518684	2.7611669073572576	1.9431916314282927	2.329498367000879	2.373663022978882
LACTB2	6.756761891671102	7.983291916138453	6.676620669874383	5.4498423964002765	6.17519497937242	5.943999801624205
PYCR2	32.332492871670475	31.72896914770292	32.32976216268736	27.43033905660821	27.412625132351	24.235434740914965
ETHE1	102.80378749191843	97.90662731084507	98.12547619227792	85.11234949809572	87.84864660092599	72.70967444815317
HAGH	9.928915372598732	7.73983701684071	8.66218342206493	7.995400270309608	8.053216493192988	5.641328324719994
TYMS	121.49495870878131	118.85234389651127	121.59164942913979	105.27800701780063	102.30111643746244	90.628390659669
STYXL1	18.77142431211195	17.737415790674362	18.2199136087328	15.090977202844888	15.41673394527793	14.612193200848537
HSPD1	173.53547611664513	186.36154100679448	183.4745076791363	135.30829828131016	134.3662291524731	178.36418322584962
ETFB	60.56713196765569	56.273115109113434	53.85215220653266	50.65735393306803	51.35052102145874	39.147935182391244
RPUSD3	19.950712004591743	18.11910801925031	19.90729332119451	16.350037374448426	17.729830542255897	14.040513898023061
ACOT11	0.9329054754874313	0.9409248120310136	0.8549240081183115	0.7140273334048741	0.8402002738293591	0.7141507458803225
KARS1	103.76324631409891	106.85872047652383	107.11057392382295	90.94689118784963	85.66236761235696	87.58773711109362
ACOT13	6.292485635946674	6.735201285111475	7.5227543964940224	6.123517248218418	5.626373604717545	5.354720636045664
ACAA2	50.58528661798	56.938465568741144	57.43289734766913	47.36546523356449	43.66769941704761	46.42134099861891
MDH2	155.40025855266964	146.97371790785257	150.77099604050642	131.4988022774056	124.6689831727214	121.67716587853167
ATP5F1B	472.1115923541421	456.75023953258886	462.6028553189288	398.8579863526342	383.76526862092084	379.2598661659034
MALSU1	7.777753323066182	8.943202080699294	7.7490878300822885	6.700507009710117	7.006867262180197	6.802623046341567
HYKK	0.7055838172083958	0.5879390045123473	0.7603457865766228	0.5383414862177209	0.4401130667859142	0.7158713830714752
SOD1	222.58990698867748	256.2617587943533	250.8319140983389	216.0421038628364	203.55834501901833	197.05700637159788
MRPS15	66.11810945720245	63.0295914874434	70.59701792140281	56.69729954384923	58.2644534412804	53.925765501090794
FH	24.133099828911032	27.24997037080149	26.519100549837166	21.24727514614232	21.69746746710361	23.02112748253299
ETFA	33.8164507801027	38.243769807977536	41.00192347842565	32.98757539591697	33.161283231354254	29.719998968121025
MYG1	38.29043549771939	36.23849035303418	35.45200671265397	35.36754082213217	34.0132881342387	24.080038949719054
MLYCD	0.6849260009383109	0.634221696438984	0.6057821825557158	0.6970419189872425	0.4698814646177565	0.4235449002394252
DLAT	15.07732119717111	15.663218729843646	16.348419426409315	13.264941038418574	12.823210651386633	13.935083324423466
FOXO3B	1.118353669014803	1.1665940715903917	1.0464494028196614	0.7445832029414113	1.0939842754838376	0.9941373841143608
ARL2BP	33.89860953521654	36.70622976048608	38.00903212495619	30.671494139874824	28.60207536763425	33.25605490409961
MTHFD1L	11.799838778230074	11.876657553977864	11.314272765786704	10.179627537365851	9.980714142323801	9.649269913563337
CARS2	6.679341872035638	7.0184239391747365	6.814779819937424	6.614705927795441	5.963208351223513	4.911006636759758
OGDH	28.20552124624217	25.972173907699926	27.229316614989933	24.21696298922725	25.074481587348206	20.236408774535462
C1QBP	155.84491119985876	147.85489775241044	157.2623002470587	149.58579187406963	137.03756022852806	107.47409891339721
BCKDK	23.72839690941618	21.452871406477293	21.327418630723745	20.022252919400398	20.214430337208103	16.6527665243018
FDX1	4.515284563904651	5.472225945080072	3.9108265416520567	3.687698141174781	3.6265913494374717	4.5868782835998765
CLPP	21.14371973648785	19.136712599942673	19.348226682953722	16.939432368882773	18.975800285004645	15.171138738724652
FDXR	16.406847890678435	13.293431570921305	15.113001081000062	13.963693161002405	14.32202279552727	10.15429821770196
RPS3	642.5839570971215	641.7740545046755	618.9634621509825	581.8799834440064	553.7993969748265	498.16528730789736
MRM3	11.955724695301582	13.042257098598958	13.864394099910847	11.74201574464237	12.788592760496028	8.841777437380772
SUCLG2	20.542211407807784	21.695229838796713	23.131953971644975	19.360913068634943	17.706124302739173	19.20372972825815
PRIMPOL	4.7282549175656445	4.7200710866242845	5.272951229142698	3.6296966408894558	4.063105369947385	5.0444778292315835
ACO2	37.16657435878659	34.7037161585929	35.37206763768295	33.478804428128164	33.121753055300864	26.2932789505865
GRPEL1	15.010806290426983	16.690414898231673	16.57623058883494	13.792846492942337	14.944331915533068	13.195711266594687
ACADS	7.9737017450647105	6.604230014079003	6.324508729997271	6.791094104567852	6.9535047257088	3.9384832934166067
NDUFS7	22.834534814156267	19.444975819094015	20.409546949143586	19.90226559339865	21.051676887790524	12.938139442823418
AADAT	3.1110902808435044	3.1472256225058266	3.3781410738008133	2.3202036454942205	2.8252347778346287	3.2848748732650646
PARK7	179.81398287703618	187.1913141221655	189.39866173010086	166.60286992205275	162.58184520697105	157.72465693936644
BDH1	2.6842594890324265	2.123166085275897	2.310239185070402	2.1987682586791104	2.005516879346587	2.030939199509117
UQCC2	22.888102529841976	24.378173832236	24.615835156562586	22.19322727800107	22.749146429434	18.156803426830663
GLRX5	49.90103665459362	46.343417943771584	46.99459748799242	44.81778202804764	41.14724744823536	39.985715967435006
DARS2	25.280461048605005	25.23670473188685	24.148544532123122	21.47129310697527	21.94992040102928	22.40911513132163
HADH	10.86800257796324	9.698694309984713	11.654894728471785	9.541845211061966	9.957371676464092	8.972494722206827
PDHA1	20.741438800095906	21.861757632696882	20.86428025237639	19.10754894072837	18.728074509300345	18.318750173239287
ALDH7A1	22.9139756476708	24.26743626509844	23.58262950096456	22.30932221680025	19.610076184911122	20.827055695453502
PPA2	18.280801485258024	18.828734739970773	19.070058262230162	18.261063074900814	17.04565125075199	14.574689734594415
OXA1L	43.07402256547143	43.14123474900525	45.81569295200786	40.61295620155648	38.756899885018846	38.064219454510656
TEFM	2.075446594426349	2.605932342578337	2.166794150726792	1.6397376637887524	2.088580971702933	2.378045170079766
DNAJA3	13.282858150328632	13.176993536217669	14.267788546819643	12.610579093281455	12.907063935611546	10.823880163220204
ACSS2	25.72218082243249	25.17764561253037	23.77714770398605	24.24826749980455	22.14661760400835	20.26814702168586
MRM2	16.88127328473544	17.421084993505954	17.137407117890792	16.019692052111733	16.067868277734068	13.890869940294913
ALAS1	31.538698654705392	31.94844799143001	30.768083162942986	29.107906127249212	28.077147754669852	27.08248752126165
PAM16	0.1869070194792959	0.23322939026510078	0.3720764675293248	0.27534907130604197	0.2784224745303604	0.047803115603318805
MMAA	0.3372245577205751	0.2042540195174237	0.4714284670000621	0.3088687945001773	0.206956613978587	0.33723990197193
PTPN1	30.225679495885412	29.692239567955852	30.035343712316855	27.570717434704697	29.463520276348042	23.916630192290764
ATP5F1D	94.3900591441318	89.32919666540563	95.79496369263003	92.50616917771205	92.8426990679795	66.68086429766379
NARS2	9.005056657407046	7.687481066918205	7.5409238630936075	7.242924358667473	7.609481443843602	7.063889038236282
SUPV3L1	10.46152659143336	12.508450947562078	12.127218142135241	10.292426350257253	10.63355464920914	10.84234955199768
NDUFB8	139.7423719279684	140.02336633030203	135.9908641622016	131.09727834844824	125.4605000837375	119.97393226368625
PCCB	29.418496462351303	26.17683713590798	30.643399553532934	28.56616941564458	26.14253067661965	23.438638138096252
LIPT2	0.4621829693323965	0.6186726646770668	0.5854986447709452	0.6086673747470197	0.5111457646843401	0.38686040237304137
CS	119.95582867008619	112.48996254424694	117.34875039419092	109.395300446111	104.04911755097119	104.82686452177396
NDUFS1	9.300905698862907	10.492655850944004	10.318821150661638	8.827185617749215	9.163088102690155	9.495676466383934
ALDH6A1	4.538309874612282	4.185698247091197	4.261606655592152	4.065824645471778	3.9045471552467466	3.8909348528733694
NDUFA10	12.643311680459712	12.428198251806716	12.485291279998346	12.091829310917596	11.653028223854669	10.573267889164965
NAXE	18.0211418619435	15.49786129951286	16.98437984969319	16.44716009752434	16.934072374204487	12.829665820571853
PITRM1	32.751320570602225	30.433867162783052	30.74525545412253	29.267131075846617	30.30046895390797	26.485557107889285
AURKAIP1	45.79967975851353	45.48585850524611	46.3719089699098	45.129352437360474	45.58307950028028	35.57453003275661
MRPL12	69.70538539457888	66.8003617535086	68.7671690467816	71.61085906901215	69.32158291812038	46.56429926513686
PDK1	6.065638868935789	6.3759857416125705	6.086410068085432	5.401595135688129	5.253442793957119	6.3580207853552935
ACP6	0.8927418910636726	0.9669192965487978	0.9002078352279922	0.7583513925513444	0.9580371062249424	0.8197868727931586
ARHGAP11B	5.585802574603053	5.178973895764012	5.16383875659588	4.345002332679602	4.298676817002505	6.0075216718172095
ALKBH7	20.745302734685446	16.904135984322302	20.17460703360393	20.014506661931062	19.892113909802248	13.217611472127365
PDK3	1.1486868300175201	1.02118933918552	1.272282216097601	0.9822236482637704	0.9364335285529505	1.256997918814208
ACSS1	7.435930270764519	7.585517439157911	8.186360023450396	7.8931552325910435	7.664244838777876	5.859094151043117
POLG2	5.966580961941235	6.223420848659204	6.455949896821238	5.519774002243467	5.01855613346112	6.6838229834046174
DGUOK	43.35076357769163	43.84354706236018	45.757627402563564	43.33401304650536	41.45735478665466	38.34327652200625
POLDIP2	40.20303272405646	39.891343566156095	41.4552573634118	39.61265786265572	39.74911698220854	33.2754553599123
NFS1	16.219946255576662	15.32400768613882	16.268171061272394	15.604745928022776	14.422215794855516	14.28961645562559
ACAT1	19.989454826556848	24.268273231059005	23.090421026487174	20.52261550794061	20.64616869128517	21.283272301425743
ATP5F1C	145.29238931976093	155.5723753966763	152.72516615660626	136.29060840002242	138.93911308956083	145.97517734886807
LARS2	5.94754843104267	5.90232917906465	6.228956812373554	5.519108843298644	5.77180281091696	5.502939079794516
NDUFAF1	5.74106361341978	5.681862077335452	6.467562508838871	5.8807818332175055	5.570686733446344	5.216979626140269
NDUFS8	87.2194458890405	78.87102446993931	86.74676104375382	85.1293741437062	83.05923896224743	67.86348105143121
BCL2L1	116.62770732888362	109.89823779202197	112.1586175621722	111.8795790371827	108.3209933546936	96.18602656502901
GFM2	10.693826478908646	11.822445610575492	10.609105909457705	9.771402289518845	9.606820334514495	11.569938251005519
PNPT1	6.58712854617318	7.607106945721267	6.077694583944148	5.878817298387174	5.6024271079555135	7.482654964659617
PRDX5	486.78392983729066	447.983088387071	471.9535142912543	475.29532968783866	460.9289835762732	379.9638186730772
HSD17B10	154.75978021195976	155.2664414894041	152.39293498270644	160.35003576724262	160.49609481670964	112.79045970537207
TSFM	8.930922568894752	10.494354447108792	11.166861990438742	10.25214784935642	9.570762405253982	8.942479617352094
ACADM	11.05621545722232	13.311576721235195	12.1648766525318	9.848004678401837	10.468856831884544	14.039260237464411
SDHAF1	12.70726763091439	10.607894169470827	11.700688369924677	10.84944649716801	13.059127286332027	9.036571618303112
TRMT2B	6.071934558447327	6.133489537592581	6.418948017164115	5.604964413894773	5.886580218613529	6.043582689084706
NDUFA9	12.297691643331424	12.475756636225126	12.934733107822632	12.013470328150591	11.712452736866064	11.806474647337826
ELAC2	23.45223984879109	21.801905819196765	23.86196763016367	22.930661308484588	23.50323364185101	18.77998315327606
ACADSB	2.3806593274302235	2.907965181751312	2.13644928622729	2.0160404210775766	2.085065918064816	2.9016844868903733
PPM1K	0.5102534403989955	0.5619682922693163	0.5492850787668814	0.4112555958867642	0.5507893563782136	0.5702360764291675
CCAR2	23.057636175598784	23.100245415048843	24.17977578870456	23.88233794538585	22.99482184580229	19.653992090678212
HIBADH	30.841739038260553	37.038157000672385	35.998909649651814	31.625524151524193	31.26018313076261	35.443573162773404
GADD45GIP1	11.037762286022097	9.23374762001846	8.253855779317668	8.849356689170627	9.395538417351268	8.843493478599955
TFB2M	8.055152560766839	8.8634485702361	8.198352280126596	8.898348406842501	7.389458112201566	7.569450291323728
FXN	0.9910807150739048	1.0036007895627324	1.1319611437735921	1.1869452299686232	0.9452853270574508	0.8388466627212786
ATP5PB	59.26868922918896	69.25102138497007	65.5396114990139	59.78223124222482	59.80012361607624	64.87076063497437
RIDA	5.879380607827831	10.630061121551787	8.514359037558398	7.732091786249502	7.21698109667147	8.596277021577965
NAXD	11.224445468755027	11.249766274895071	12.385873461494988	10.988588322682881	11.832403520159136	10.382394028861057
FPGS	24.640590117284017	21.400635250058972	22.85981421438773	22.321167887695264	23.97830726606803	19.33647098022532
TTC5	4.9421654042008045	4.881126102615912	5.112821061569509	4.254841503671212	5.090746412604147	4.889267743901447
CPS1	2.0448088856829507	2.0041556645069227	1.9654048737953262	1.6512342450356883	1.8337599092874128	2.2482762436133132
METTL17	20.845361325114276	21.11174192181181	19.738186459881184	19.84785486279244	19.557879741659242	19.419255651162324
DHTKD1	11.217762720334564	10.79943556012095	11.18958090117555	11.064529175607372	10.533004051145843	10.151233906311338
FLAD1	14.353056234558267	14.288190514257456	14.094791695056657	14.261872781166232	14.906806887508314	11.722334203337732
NDUFS2	47.71768292142952	46.75718709069189	48.59005516502451	47.745708732316004	48.46204181066447	40.72870173397511
PDK2	8.64001477375975	7.678851181335652	6.924636533642473	8.33639044659186	6.91491636925452	7.111012268559367
TOP3A	7.513091038632827	6.598236150024025	6.682944223771425	7.083038948717962	7.256698237599301	5.674237492079816
PDE12	2.7148566968801013	3.02481163125211	2.821319158907348	2.5375313231067462	2.5155887725518857	3.1963563221626416
SIRT3	6.18870574193619	6.127902266955895	6.176587899625695	6.1054611841241035	5.974282090018729	5.749471182791913
MMAB	1.6458055048194218	1.4424899996410125	1.7467864747015402	1.8864990417701715	1.4523436604299884	1.3264293562070057
ARL2	24.79846907027019	21.367665032472168	27.343028566236292	25.326254111834082	24.202440338746438	21.43302505792923
PUS1	4.305180744018292	4.247626124502058	4.157502449136936	4.321334096970405	4.480330336843476	3.468711522367645
ACSF3	2.5378011051717877	2.357627348783252	2.4691198274474924	2.6062131430477837	2.472705995225208	2.0352904595845183
YARS2	13.540891943914374	15.055931508481342	15.047061071887233	14.927985853296137	14.300156558566435	12.950148091411508
PIN4	8.549745055231893	9.113587317899713	8.30807184910708	9.05159306605242	8.250794507764844	7.827545311381919
BCAT2	31.996806648181558	31.272431383837485	32.381710349686735	33.4233212547329	31.001197233546602	28.62030868806372
QARS1	119.62704689422499	113.13846810688159	117.84669434417735	123.7585014919856	116.77096878344815	101.13625007607459
PRORP	7.0303415932820466	6.6672645682822695	7.150271787948066	6.588821909873872	6.116452435186222	7.6284138600628255
NDUFAF7	2.656342148464132	2.8292910619493927	2.8781284060785985	2.535609023063586	2.449959491137729	3.181213547277207
SDHAF3	5.650795752471738	6.972921508929992	7.994123279692876	6.217817590816026	6.910745839164116	7.038856670050027
ERAL1	28.63913364974305	29.561906304661925	27.98086709117765	27.675472260168277	29.78462501990496	26.890713981647703
NAGS	0.7331179577326904	0.6390794544643883	0.6577670145211613	0.5678979357782437	0.7998297184290495	0.6338073554370379
RNASEL	0.546531012411469	0.4869199983694099	0.5147438208764585	0.5367617537422997	0.4493761452363741	0.5410842421357251
POLG	14.930935769768217	12.971609715874653	14.300406758534765	14.938139124277157	14.855437976298672	11.85444168972145
TRMT61B	3.9729157400775468	4.137977395426358	4.080168314237981	3.3493185710732867	4.276140327965712	4.4755740368246935
IARS2	40.511776625669434	42.66024362980887	39.62823764327349	39.226359888022536	38.10173306041932	44.59195569283932
FASTKD3	5.8047779826918315	6.162002541596589	7.201900929116544	5.701017395859416	6.1401655157299055	7.193102200053105
MCAT	8.979725919695664	9.142279852846231	8.689380135808113	9.520077651359289	10.169666395308921	6.9477271201388975
HSPA1L	0.7844917674732471	0.4590785214950207	0.7090434294961658	0.8590286015148249	0.5910177180164747	0.4889174358465434
PDP2	3.2294936988029157	3.127565331071148	3.2179129848065324	3.137916170387572	3.1626726827900695	3.233364761976709
OAT	22.94218543784737	25.534723984721175	27.988869259616802	24.50743186279368	24.65674059953373	27.00504199263468
TRIT1	3.9844992948595017	4.59882388963532	4.050645512507309	4.410130420005055	3.561260063009178	4.6258935637362235
GFM1	6.064813678236262	6.424916197627393	6.580239089305521	6.093132309868549	5.764107225731523	7.157653494545662
AKR1B15	1e-08	0.0073275230964514	1e-08	0.0072090211836192	1e-08	1e-08
MRRF	3.528745256589061	3.9326415389497518	3.6139396480210335	3.780729626949237	3.492284751600068	3.789039847698189
TBRG4	34.583317489578675	33.78630374188937	32.19529030853488	36.41555246782144	37.15534865485002	26.92126597316716
PPTC7	3.317078484970083	3.35093462295	3.1733444119508425	3.0630002172559463	3.156276812514806	3.6775463135561353
DLD	16.626550228554176	19.673727739246228	16.700213614859493	16.15332893920118	15.21779514336001	22.01649893185668
PDSS2	2.4889127073785446	2.387381143136391	3.069752034820339	2.8907962669269853	2.6758921256547064	2.4410739577247216
MTG1	7.7465558946287185	7.435439841404785	7.413710360023554	8.043854270869916	8.148085476063153	6.6078858436662395
ISCU	7.542640346227483	7.544205831293755	7.762692627400527	7.5372723838397615	7.439593981741632	8.083475650755034
ECHS1	84.33106686412245	74.66463288044334	81.82313128477419	86.40552012080383	86.55650050525377	70.13224694209846
ALDH4A1	15.897037677946502	14.141011150252027	14.352261195180079	15.634867603605272	17.1138593562252	12.117249257762927
GCDH	2.904728706994112	3.007097436415866	2.7841444746011796	2.8263917154256437	3.29864974703082	2.668972324035837
AK3	10.557886422204735	12.791807595366866	12.024188453528653	11.512263965768026	10.769759156812288	13.504181471962223
GLUD2	0.1804010008394733	0.250123268916094	0.0598541604617092	0.39372516003654007	0.029858998650841403	0.0922782786435091
MARS2	2.0898451336641926	1.93838503046822	2.006425687505239	2.020166424438393	1.8466145476279128	2.2474092473683194
MTG2	6.7993535130873575	6.511542183782315	6.718817920240822	6.638586844597106	7.0269614539623495	6.635367109672711
EARS2	4.029825461427826	3.6775414422384207	4.230585233121895	3.919573182773701	4.384130688245672	3.799741067493525
ACAD10	5.365072468790337	5.640862244867423	5.297800529398083	5.9315476792715165	5.84690572738013	4.761394581727688
C2orf69	4.237487265550518	4.566948482713117	3.2775188026445234	3.624956849738005	3.471090587171738	5.177266730381113
GOT2	94.62184726429271	87.41325423612265	85.40685808984139	91.6574585437852	90.3716845493472	89.95022121376066
SHC1	223.7971103641272	211.02093173346086	226.8964903905956	236.1292775941485	232.72289783248192	206.48315588122207
LYRM7	1.4617231230064973	1.6950626922598704	1.8096921901306695	1.329400095504869	1.495366072914736	2.2820121975894656
MAIP1	9.587900853480233	9.653959538441288	10.614693178206101	9.85562901085649	9.636737125080197	11.062382391735046
MTERF2	0.5820895951484869	0.5172638303436912	0.3817905685044048	0.4494168963359536	0.49453026515655557	0.5748449482406122
NDUFS3	76.33186096742544	81.5392871208653	81.9942163493842	82.51888998449273	82.2779907390426	81.22517625912911
CYP27A1	0.7658209237857294	0.4630042686657294	0.6763726479047855	0.6250109765721887	0.706968788493505	0.6289762557056858
MMUT	7.724794973611762	8.182105224500422	6.923857043084516	7.352007987810492	6.837548378427174	9.356416577889417
NUDT9	2.360719441590126	3.172923276953572	2.846365930127933	2.513622143202581	2.780247929321627	3.3556166402103385
LYRM4	3.4800884873133926	3.7338405766324896	3.588240208972419	3.8336161724787647	3.5731852755727065	3.759030317672957
TXN2	44.61156631331661	40.73244575836464	42.453752649481935	43.007071568008634	46.50029097457731	42.80998630367672
FASTKD2	2.8433649159124763	3.274558537653656	2.546396537750537	2.6361865472178603	2.647227723893541	3.689103599879312
FAHD1	9.899205884888419	9.873096446781851	9.441524072075914	10.305062884370185	10.179004696999852	9.786900668812034
METTL4	3.711466377589789	3.651052750911109	3.344307341568121	3.6252050915762632	3.0480105425726416	4.447077249213847
PCCA	0.9172188941290345	1.2761611751020656	1.0727226866678692	0.8811180624921487	1.1642164906119798	1.351806257797016
PARG	4.0199115328889015	5.153061535040896	5.28994742065103	4.425598064932574	4.699587913849751	5.963429295006256
PRDX3	46.85992211967514	55.4237709071869	56.82611371192718	55.20470908005816	52.89049748885161	58.01283934889743
SUOX	4.239920378184658	3.642686520232159	3.901204210524712	4.403487269048919	4.227188265880689	3.6749951156766967
ACAD8	4.811768835432106	5.461689701901069	5.064349979313385	5.574644532581316	5.287328943978684	5.164180625327833
IDH3B	53.01863656129135	52.89984584177007	55.372408308740816	58.11950265347811	60.36781600761933	50.04418794785874
GLS2	1.864260801625071	1.6574834724173166	1.9812346168197692	2.107484868896856	2.0056548578033704	1.6489369213335052
TRMT5	2.8479777559479884	3.708323964695688	3.0771305856025117	3.3281080031525474	2.705321371520555	4.057900595083317
NUBPL	0.6751021345286743	0.9152626639664216	0.9286294653556476	0.8318710733784506	0.7557958202979088	1.053383443259788
GLDC	0.0453649626650568	0.0517559338850059	0.025802345657446	1e-08	0.0836668179074883	0.0596699287039084
SUCLA2	7.692228374069991	8.656444904908062	7.351153886499256	7.357750408258048	6.537718221418964	11.297203111955714
COASY	31.737002479719248	30.548777500055344	30.05950767945185	34.22845781062267	33.09399347601859	29.806075173795833
ADPRS	23.162885171776328	24.9672192342898	20.812493872596285	27.23370504640111	24.449763331439883	20.884219632706372
IDH3A	7.25688654586419	7.8690345670504005	7.571740910721743	7.262495475761606	7.982128603535997	8.663348683971684
TRMT10C	7.129553969077384	8.365126144097326	7.985175347015168	6.961638328889327	6.807426708266809	11.341201122113137
FECH	9.82623873738302	9.386446648372178	10.296489998071461	10.488696855507843	10.235399863897173	10.417958910168156
PDHX	14.536712002612378	17.195066317176263	15.503984513026767	14.792012538469448	15.626840403573144	19.566841264296254
FASTKD5	13.504278067428586	13.367178390930647	13.07515883489585	14.175196398492275	13.515359885236998	14.595320913073262
HIBCH	7.8393183125313115	9.065472472929148	7.928420991672662	8.280441002633983	7.852572823898577	10.213458478983023
HSPE1	10.50764699039911	9.864555984709883	13.440677537528117	9.880681092324085	12.610821464485253	13.723010038672669
RPUSD4	14.593527090282281	14.3500911754439	14.318042326404688	16.32304455913904	16.33752370849711	13.720273100094953
TST	8.359387640594939	7.719589076071977	8.38503179952957	8.422107081613152	9.395611174277358	8.64033879321635
GUF1	4.377982401543293	3.985764614131328	3.868510640513973	3.9542121481346335	3.726616028521165	5.678515919159082
ATP5F1A	75.0895990717293	80.97613317155964	77.58318017860813	84.92468802755194	83.27602431121825	85.85896306753656
BCKDHA	41.775808871266065	36.265776227012644	42.91929705500578	44.005848621266864	43.8865141298969	43.79121213858057
MCCC2	14.851060863646605	14.046936469243528	14.552714693979096	15.461661829531185	15.123856332228433	16.867182957062113
D2HGDH	3.733789227497555	4.111679280422249	3.9169608424575615	4.405733480413824	4.348205168355776	4.117503282087984
MTERF1	2.155622770548442	2.2066008542206084	1.9334671201570448	1.85394970028514	2.0379185715895622	3.1957837170928745
TK2	8.00211667730881	8.465038223304457	7.9695818319108955	9.367433054753313	9.230192389063857	8.263089005926188
ACOT9	15.82107452898511	16.824340018742703	15.948469691443245	17.9004522632245	18.73605438811507	16.78738127222524
DHFR2	2.6588909198562547	3.1256111289510886	2.875320838646654	2.9286315824843188	3.023014687866227	3.5844817215552185
REXO2	47.896695075039176	59.18597198048501	52.44835394602458	60.7880644128869	57.16116317239607	58.200767965523646
ETFDH	2.4951141023066765	2.2546650140235562	2.6354133409017364	2.390562451109191	3.0613391711648057	2.7087108508208995
GPX1	295.6295713855548	281.6103799637469	283.48100216919204	328.65505013360405	333.1842792649533	290.8245988072884
MCCC1	7.790755996050253	7.46088295269529	8.187388848386107	8.592550368368101	8.91536912504009	8.437722077378108
ETFBKMT	0.16280230233686188	0.09480363988087599	0.1721734123052505	0.1598922062970125	0.1852547775270669	0.1422635626010248
OGG1	2.9716340713227765	2.976362511005485	3.577930291032748	3.554665100428169	3.667996260255692	3.338530184535535
PDK4	0.0069162441052808	1e-08	0.0137681821648937	0.0475482534385283	1e-08	1e-08
ISCA1	17.637603012171247	18.529771915722822	18.5008256159402	21.00317005770101	17.91804969415709	21.94281630661808
IVD	10.602316575794886	9.340853114221535	9.885287047191676	12.307602121923477	11.217026746499444	9.783418950142044
DGLUCY	2.3463001946946025	2.63810091953966	2.197728790315826	2.619693479030312	2.648934088445337	2.7692428297222866
NSUN4	4.157785708063973	3.6869427227343934	4.046634460138591	4.602099600686876	4.511304559180526	4.240542740667942
ACSS3	0.0029176949827923997	1e-08	1e-08	0.0028655412729639	1e-08	0.0029849040120159998
SDHAF2	26.501317948071353	28.82428029023369	30.72571936484836	34.38036395183427	30.63496150670995	32.439606656474766
GSTK1	84.1801134743327	84.75956056936552	88.08569062920695	99.55291204030163	96.70679480253452	95.52522478856132
ME3	2.877952607071203	3.7293378004389615	2.8508033180324954	3.7709436475114257	3.46951772598678	3.5104476272606067
TRUB2	7.963429094173405	8.042921552135871	7.748861839918091	9.581347528930436	9.785302498053163	7.694987546240375
METTL15	2.437788442308453	2.9411555529271216	2.4690265429267773	2.748911103914485	2.590827024675331	3.6023621483986967
FDX2	8.244362924420871	9.13908866641169	10.680101765474893	10.634858682182637	11.97555914395821	9.390995683804556
GSTZ1	5.892152412203499	4.868081123756407	5.612037028615563	7.561751245186413	6.5114679968131375	4.813134891720666
CBR4	1.1804486809559933	1.231012907394156	1.3952670433155048	1.3146179609710318	1.386859263864817	1.6605055174615377
DBT	1.5897516190893048	1.4927227923774586	1.5420756920343157	1.5480843939978388	1.5787621342843419	2.1899657587191776
BCO2	0.0083156557472842	0.0996150427997051	0.0082770029826014	0.1878410863801206	0.0165163342731977	0.0595503896347186
NR3C1	1.9928194799649743	1.9869322837842416	1.6857799106800442	1.8900390232833704	1.9220491875149628	2.7932520016046336
ABCE1	10.303014492400521	12.19126633120172	10.038286845366827	11.830493680830386	10.028175020085714	16.518451083360866
MPST	29.28305357129795	25.285166541051805	26.57853376485249	32.15126089265524	33.63204639683602	28.47350096942341
FASTK	27.240571180044928	25.856742023710144	22.945034956744948	28.742020634742715	30.00961067025793	29.599539076246305
MTERF4	3.0649880263420566	3.162086221064489	3.561260952874169	3.3796073072097115	3.670465507671763	4.331312204246989
FASTKD1	2.4564634331829245	2.3874240721528905	2.31584872475349	2.4890419165591746	2.4008118303699924	3.51561167755394
TWNK	8.784923093588251	7.771151981333648	8.154828194535813	10.191739570841692	9.98788610166394	8.667055701742708
FOXO3	3.4052629276318815	3.392553200671864	3.0785240520121286	3.949569756612519	3.7258285294196334	4.000583634256692
PDPR	9.183254245172877	9.01693603392173	9.159580709600897	10.38853958656276	10.871224799111921	11.30544874260881
BCKDHB	2.344136320191831	2.6329513463802017	2.286980280639957	2.775804794520355	2.6971702788559937	3.191568166959998
PDHB	40.60548580643428	46.40843710137271	45.762873573638686	54.43890297546203	49.58127665560215	54.61005215042311
MTRF1L	4.846380207144165	5.2212614098058765	4.629646194826041	5.62516028315599	5.781704818991701	6.1621066335143935
ACSF2	10.782455949464563	10.932637109306071	10.19572011586657	13.174856549261232	13.552867377765606	11.420153822655681
CLPX	5.500570098786397	5.880261838800169	6.182976804124984	7.125377818476756	5.954384734305347	7.982754585715798
ACOT2	12.786759818943397	11.155971026112345	13.092452592231894	16.12235624743458	16.14618398606527	12.344139893708567
TFAM	8.022637543273996	9.749999724756856	9.56860572564048	10.395331025658349	9.118705032912384	15.035988466021372
NUDT13	2.5961416739114043	2.8771687411396	2.584074294435662	3.414052696811988	3.200895023489536	3.184881920821116
SMDT1	11.95839902398024	9.788914824852588	9.998363780308257	13.26361600185595	13.696680031276143	11.744506928264805
WARS2	3.1705433037026274	3.3342345339157533	3.5283176111940495	4.209619004112327	3.7797540298248578	4.2549372268384165
TXNRD2	3.7561686316026224	3.458528494571566	3.2982722560580133	4.558195341148097	4.758880568440407	3.647213859823817
SOD2	115.38548634731288	125.68919827917125	123.90428657898852	146.82083751710485	146.52084542594085	159.50624363011835
MTHFD2L	0.4797022865891089	0.6181357941857033	0.5992767513316875	0.5792946406987851	0.6708296076174701	1.0265735818841644
SCO2	8.834423081761713	8.800797155578673	9.122424344412051	11.490509921957806	12.220679251449972	9.84588863106351
TP53AIP1	1e-08	1e-08	1e-08	1e-08	1e-08	0.0027797454665687
HOGA1	1e-08	1e-08	1e-08	0.0100164616568468	1e-08	1e-08
ACSM4	1e-08	1e-08	1e-08	1e-08	1e-08	0.0216935436624682
CA5A	1e-08	1e-08	1e-08	1e-08	0.029080780839639803	1e-08
EXD2	4.800469359512907	5.871097264157148	5.658342427661634	7.007658622188727	6.449309702197969	7.213401534865558
IBA57	1.2881536659077757	1.1153100790684574	1.2727152176614653	1.8712702244496224	1.7004268519266108	1.181834446344854
MTHFS	0.20532036460112268	0.4099299677289324	0.1737110972667565	0.4234655284389294	0.4281921844281841	0.3045723938872625
SIRT4	0.2187879369087804	0.46411964717029547	0.2903612865199562	0.4208009699059088	0.4526573233073514	0.4942862216354879
FARS2	1.0630122343941686	1.3203365334497712	1.2117184368295912	1.5918581343923466	1.6200783243524244	1.4212855281689383
PHYKPL	2.5623306838146367	2.824806566972653	2.0674422914757224	3.192466183372201	3.1985971744579422	3.2342697516449816
IDH3G	35.640154579945666	33.634375165982675	32.432920808976625	47.007697951397745	48.46008191493858	36.023788285479526
MRM1	1.6123380462217596	1.2610886510383144	1.1746793244284401	1.6107256571683954	1.9533447124884	1.6721515805312195
TRNT1	1.4799654824439181	1.7068644564012523	1.810250477338724	1.845602588504752	2.0824581886818514	3.0033601538831243
SARS2	8.563161929552194	7.591622165449627	8.176477785466384	12.101735740414725	11.074934171322267	9.027811203491936
NME4	39.91304659717517	38.36605417242576	36.530782322276	52.60227460628285	53.15384270934162	46.32888625254838
ATXN3	1.4616160822398225	1.4410282672004124	1.6672838586459404	2.05374508826839	1.6563049448040976	2.9091425804885493
AUH	1.4470067279461907	1.7756931752395784	1.5749101718395924	1.869791024420634	2.098482022098179	2.7935843072260216
AK4	15.851875238797655	15.444281494670328	14.528989542852639	19.7053849319433	20.12922355237134	24.137517483315193
BTD	1.506724558055681	1.8857806325073119	1.6959881877247016	2.5175678773439	2.4350523266297706	2.2836600480745624
AASS	3.993372104752647	5.342196708098889	4.250250055271783	5.887166902990812	5.986701713990594	9.246501612288176
PTCD1	0.009116173621199099	0.018200780085109603	0.0045369049456243	0.0223830397822291	0.0226328756653675	0.0512938621508525
ADHFE1	0.3283668124041688	0.7186350811799218	0.2639865584993492	0.7814356193302556	0.6898203740726433	1.0207126710745156
ARG2	5.134856865660793	4.553526005651968	3.9435042333380137	7.052619787737863	6.67835109798674	6.493092592186848
NSUN3	0.5111174524333546	0.59784852256346	0.4599230326925307	0.8315648298895709	0.7716305940934098	1.2966642042066066
ATP5F1E	0.5381213404773026	0.4132230338713532	0.5424869697364016	0.8401833045447336	0.8632639007169872	0.7834280257366069
PC	5.624798783351208	4.8039985020752844	4.992132800782996	9.349034881933953	9.33313498670444	7.280871831224682
ERBB4	0.0495254614260184	0.045484562540087	0.0414080177665221	0.1692678448953027	0.1219740894738345	0.2614379778625033
GLS	4.525048906353236	5.357884443337163	4.650647773189188	13.172690675729886	14.31324245302906	22.06445249573802
