# Supplementary material for: Peptide-based Self-adaptive Implant Coating Sequentially Regulates Bone Regeneration to Enhance Interfacial Osseointegration
Source: Research Square preprint supplement (doi:10.21203/rs.3.rs-5132912/v1), 2024-10-01
Supplement: Supplementary file 773 [file 10_cysteine-type endopeptidase activator activity involved i...(GO_0008656).heatmap-data.xls]

id	S1	S2	S3	C1	C2	C3
NLRP1	4.500033725765541	4.883583846635379	4.848989290470451	1.6362930708257395	1.5653408037789607	1.704452306592904
CTSV	10.316801366434161	12.663007763704632	12.332766625237307	6.181814014783505	7.021616958974946	7.401445324137515
ATP2A3	1.7262281972320415	1.489125318933125	1.8827539833841462	1.0459198093281192	1.1759531196830832	0.8849625662639716
CTSH	10.988114223005212	10.7911765660306	12.479640042457397	8.013865665930034	7.272205934443817	5.890148758575204
CTSL	50.870821285939364	66.09238824464282	58.259766572515744	37.55094962917382	40.061600600164844	37.19190137041729
NOD1	3.1824476585814314	2.9651434085177657	3.146106339539399	2.1815142219798838	2.399360779176884	2.2413772657378086
NLRP12	1e-08	1e-08	0.08889408357001409	1e-08	1e-08	0.0060911061717831
NKX3-1	3.9080621342397417	4.340667395580998	4.615003643012359	3.704054534123087	3.5871423333327583	3.594394463894397
CASP1	1.3216489721019615	1.533543461616297	1.3411324205147925	1.0451625507672253	0.8096669920523087	1.5979283567110762
PYCARD	1.5463036739583362	1.7078429435343552	1.6046104527498968	1.874095316300084	1.2088880379619633	0.9424221342059841
RACK1	1508.1942627033993	1513.5877270979815	1555.3948056312686	1431.0489721150475	1471.7770086565565	1336.8011007119826
RPS27L	4.235133891281132	4.773064088761487	4.450766720185222	4.199463760961546	4.132993906349438	4.353540716903102
BCL2L13	12.60035332206885	11.940874733385645	12.381123756005536	11.65332384321833	11.698133063634849	11.502816751343993
CTSK	2.6296634539877117	2.6861610540648964	2.9674468035321033	2.6577354092913144	2.5811192560707954	3.222029100873664
BEX3	69.37921440368079	73.82069203362838	76.38250247829241	78.34792732309226	81.50869643116874	75.38445980394516
CARD8	2.2292216024221347	1.9261754708002332	1.8391881861548363	2.211267938983813	1.9727521602226923	2.4072702757623547
BAD	28.323741632759578	28.68096384496632	27.17944047163405	34.47206028931749	34.14959197282853	24.146817111650286
APAF1	6.034861658459224	5.8925910044369605	5.527054235771885	5.829718269934263	6.081664622454385	7.5754932506911565
CASP8AP2	1.1639390940568821	1.7630463289357128	1.7103833188593707	2.3439648802510757	1.9653829420245132	5.213759222407144
CTSS	0.4049651972051412	0.7895786411058102	0.680202283920797	0.7830239030890569	1.0431175073203431	1.2623007673376372
