# Supplementary material for: Peptide-based Self-adaptive Implant Coating Sequentially Regulates Bone Regeneration to Enhance Interfacial Osseointegration
Source: Research Square preprint supplement (doi:10.21203/rs.3.rs-5132912/v1), 2024-10-01
Supplement: Supplementary file 781 [file 2_Notch binding(GO_0005112).heatmap-data.xls]

id	S1	S2	S3	C1	C2	C3
CHAC1	2.8751129893138563	2.6984190657361347	3.2001038213089363	0.390172180656791	0.5287478192229532	0.20111736796009008
DLL1	0.5198212417136535	0.3612744767091905	0.3340209593071214	0.15509755259035168	0.1895013765453888	0.1817528482397254
TCIM	0.7489309808700876	0.9379417178195313	0.8267715971822674	0.14710877129372368	0.2975015426301263	0.4597095914416482
JAG1	6.4192095468823025	6.797356431630613	7.002851643550764	3.994338342935936	3.934826582586267	3.8518841257136174
NOTCH1	3.0923460078660137	3.2922735471280418	3.010609145464009	2.1985525239608332	1.9852732353469176	1.7708582630903358
DLL4	0.10177322254630079	0.1523955998019424	0.2387789362800384	0.1285123126936255	0.0505348521464669	0.0148739477037763
DLL3	1.2447360221890615	1.1469983906561525	1.4295579714226054	0.9299254991908524	0.9086095023211348	1.0121965677321272
NOTCH2NLA	1.1315356100614022	1.086242948418971	0.9995339528379352	0.9095115115949827	0.8219491084599713	0.7046264518084364
CCN3	0.5763725084765012	0.3936775680650143	0.6642765844501922	0.3078625448463752	0.2610893667100916	0.5275809355440582
DNER	11.852412190021521	11.99220074437644	11.272148824449483	10.123523444828077	9.16578665050667	9.12927772551303
NOTCH2NLB	0.2218740323885628	0.1705473061329176	0.2142174368454746	0.1285657402285241	0.165255214448421	0.224715063306933
SNW1	36.732304068276385	43.21912515044248	41.92572346861556	34.95734374227041	35.07881477325177	39.11248370251028
HIF1AN	8.149904946492859	7.870147867138723	7.523200643750074	7.628175100783565	7.823591361399246	7.554209883187512
KCTD10	14.957182226390959	14.734829413977547	15.317353008860165	15.257213390808337	14.658343055612875	14.230081614096997
ADAM17	6.784228761250407	8.184352348022577	7.39899180111768	6.904850114630176	6.989332778943423	8.059077880834133
ATRNL1	0.0360019745226543	0.0728776357367074	0.0935681851683174	0.07562775939140469	0.0615747822110925	0.07775491691371819
GALNT11	10.675204476126435	10.56370073568908	9.941946377307001	10.955555085601004	11.153245364700101	10.938762936523077
NOTCH4	0.0701559508820174	0.033174252761503	0.0477783230878556	0.021758505133598203	0.1210074903218312	0.0453296858248817
DLK2	3.9218280725223376	3.3907043162456176	3.433075591461918	4.19562931532787	3.764314138090061	3.6718498052524637
AAK1	1.6256700386956304	1.7062905904910506	1.681385242568368	1.7018186761880953	1.7441947367513166	2.083412858975008
NCOR2	21.66283305741961	22.33608186032621	21.551152850971175	25.77194500298668	26.04864534734909	20.518756112247416
JAG2	12.545432888943681	11.464284550849376	12.15218275234926	14.668478385735574	14.53658976710943	12.39748248011469
CUL3	8.29951685991488	9.783819491204461	9.636632772075279	9.592159922538487	10.74386217702888	11.92807058907307
SNED1	0.11422338997404459	0.10704452413964319	0.1624177916175953	0.15797006534213628	0.1527883766736711	0.1764741855153594
MEGF10	1e-08	1e-08	1e-08	1e-08	1e-08	0.0028354267912941
