# Supplementary material for: Peptide-based Self-adaptive Implant Coating Sequentially Regulates Bone Regeneration to Enhance Interfacial Osseointegration
Source: Research Square preprint supplement (doi:10.21203/rs.3.rs-5132912/v1), 2024-10-01
Supplement: Supplementary file 785 [file 3_pyridoxal phosphate binding(GO_0030170).heatmap-data.xls]

id	S1	S2	S3	C1	C2	C3
PSAT1	76.02569701558674	83.35503868659886	81.86409437326512	23.48442908328672	24.94621950593289	25.871751524920402
SDSL	6.814724479033201	5.189863601772133	6.631536905282147	2.483967000286946	2.337269551806229	1.97651346664498
MOCOS	7.743141391949094	7.625174657549093	7.679079996612224	4.11494370845695	4.004841290283531	4.587219119341833
GPT2	18.259885681485322	18.261313046442332	19.327759180451764	10.805591023576179	10.296370188550426	9.749293086880225
MTARC1	0.9120516322209659	0.7433608860638563	0.9451589415530453	0.4790554701781656	0.4127454227097427	0.5698757395524165
SHMT2	73.31020444711282	65.10657003373812	68.771430644406	46.96353590635853	44.112925693503314	37.956648726626966
ABAT	0.1713390892057133	0.14253544288601	0.1339978153129257	0.10817768789394619	0.0891286427895988	0.050081691152961
KYNU	0.1415544321712811	0.1841580860193784	0.17634782389317968	0.1148070355249374	0.1061121395550695	0.1167864098687659
PYGM	0.1239758015475916	0.0687562376998333	0.13711059618855778	0.0473510123844414	0.088919131346371	0.0493234024242208
GOT1	38.163874210584	36.85344929064389	34.96611083521063	29.20876301429696	26.358734248084758	24.38415150518452
CTH	1.8736429030655304	1.8130896315042735	1.849349435379147	1.0507828817380789	1.3527586125500148	1.6444989681440125
SRR	6.702408696304678	7.769453740081173	7.166407548868478	5.736793618473778	4.648098409747524	5.680253314866525
SPTLC3	1e-08	0.022181944813019803	1e-08	1e-08	1e-08	1e-08
SDS	1e-08	1e-08	0.0154452398958824	1e-08	1e-08	1e-08
DDC	1e-08	0.0089982915549257	1e-08	1e-08	1e-08	1e-08
PNPO	9.416951676650896	8.78946455170377	8.872599787897574	7.609354990280751	7.310660693378641	7.2328603049873745
PYGL	103.91914538841512	110.09918284313311	109.80399650870878	92.84205025169958	94.18761411895059	84.54786192555989
PLPBP	9.555603048594541	9.703421500505648	11.074324095415701	8.800190080841189	8.58398475263671	8.875236659529476
AADAT	3.1110902808435044	3.1472256225058266	3.3781410738008133	2.3202036454942205	2.8252347778346287	3.2848748732650646
GPT	0.3037239004038559	0.09227772132227899	0.0920080470520884	0.14266274828537678	0.0524564163607925	0.13509574322677048
ALAS1	31.538698654705392	31.94844799143001	30.768083162942986	29.107906127249212	28.077147754669852	27.08248752126165
SPTLC1	16.36154776422369	17.509816818943314	18.968395405854498	15.512283482156494	15.181677979583757	17.54228887343643
PYGB	96.08773109073007	88.72731261731765	90.44949525661343	93.03899392518224	91.99835390271875	66.39658577378479
LOC102724560	6.670736998163888	3.1674089289709277	7.6353725235331495	8.898022208321958	2.9674773023981365	2.1183660801291637
NFS1	16.219946255576662	15.32400768613882	16.268171061272394	15.604745928022776	14.422215794855516	14.28961645562559
SHMT1	27.032441300508214	25.34232513626551	25.75613961792044	27.076042161535764	24.38419396308089	21.041744888325024
GCAT	8.826151829980905	7.504228415062008	8.77317357964426	8.491478294057112	8.96787035259088	6.228486524122682
MTARC2	5.683102066684231	5.773382003252264	6.37763604586688	5.548683991043477	5.466755547343247	5.962212947304495
KYAT3	11.533430823043261	12.45962466214668	12.309550804805705	11.102968004754636	11.646488721733038	13.200977760491927
OAT	22.94218543784737	25.534723984721175	27.988869259616802	24.50743186279368	24.65674059953373	27.00504199263468
GOT2	94.62184726429271	87.41325423612265	85.40685808984139	91.6574585437852	90.3716845493472	89.95022121376066
SGPL1	18.356862413094092	17.787068308687623	17.936759600289204	18.22374571091537	18.938239269588184	18.24078153634287
GLDC	0.0453649626650568	0.0517559338850059	0.025802345657446	1e-08	0.0836668179074883	0.0596699287039084
GAD1	1.4412182035032735	1.261650008100873	1.22485864881635	1.5080054540346222	1.3982265139338692	1.2589250653345871
SPTLC2	11.817248670015088	11.64114892038668	11.144483201458089	11.695580943320248	11.627464985723181	13.597256303966265
KYAT1	1.474917690803773	1.7746755028606935	1.4568980125973023	1.6964048475082592	1.9659576876597904	1.4170967575304039
CSAD	1.2049221513963828	1.191951230236621	1.4489539490175058	1.3493791882830681	1.3157107215990858	1.5227193824241059
CISD1	5.169828217775275	6.699722637034206	5.949502565893903	5.674760597476655	6.644117396204012	7.434520142038847
PDXDC1	9.566383635138024	8.634089080208598	9.391479971947756	10.466844143044364	10.785391145367253	10.503993599595765
PDXK	14.391652101104984	13.775200134105768	13.665260582237321	16.889577690827828	17.18486566018229	15.408676753930449
CBS	6.413777467948092	7.749891897082609	6.316122614836281	14.291864681525134	7.188465725998558	7.956103480710219
GADL1	1e-08	1e-08	1e-08	1e-08	0.0057147039924014	1e-08
AGXT	1e-08	1e-08	1e-08	0.0084345530848345	1e-08	1e-08
ACCSL	1e-08	1e-08	1e-08	0.0131013356272201	1e-08	1e-08
PHYKPL	2.5623306838146367	2.824806566972653	2.0674422914757224	3.192466183372201	3.1985971744579422	3.2342697516449816
ACCS	1.3373305717937871	1.5026990245651157	1.8069717114766395	2.423809823068655	2.239140156327024	2.2802267477085025
