# Supplementary material for: Peptide-based Self-adaptive Implant Coating Sequentially Regulates Bone Regeneration to Enhance Interfacial Osseointegration
Source: Research Square preprint supplement (doi:10.21203/rs.3.rs-5132912/v1), 2024-10-01
Supplement: Supplementary file 789 [file 4_actin monomer binding(GO_0003785).heatmap-data.xls]

id	S1	S2	S3	C1	C2	C3
CORO1A	5.035431585311256	5.783579581617001	4.713012995834008	2.585107528706313	2.3156294658618783	1.7415322208568074
NOS3	0.38159880015441777	0.3134302613298843	0.2355876952524577	0.08539239732124919	0.1295182957207271	0.049416331347108
MTSS1	0.8284633986594433	0.7692401396394417	0.9232075131851553	0.4573648514493421	0.3960377494486178	0.4461466908960157
PFN2	119.55058997721035	118.84569380399199	122.38575320545631	68.80395083519956	67.25205995365742	67.38818043085205
PFN4	0.1826799049617324	0.2532829351860202	0.2121358998291428	0.1694470247034804	0.12094473175605709	0.1557399567394188
TMSB10	5729.150991905731	5774.244529423281	6182.07304175207	4452.813019142095	4566.305879914912	3413.6407174061883
MTSS2	2.4829305385215523	2.3580508492931824	2.3734244024700994	1.5422168963037615	1.657172986193534	2.0961752069190887
COBL	0.8742996471303692	0.6647227549537984	0.7085820355950878	0.6539727343474553	0.4757934695199567	0.5482939939952882
TWF2	89.4525193402568	83.5673585937727	84.84369094029203	69.8039441248503	73.78583446460493	56.641171241852106
LOC122394733	0.0381984133943499	0.07626458649159429	0.6083336046721783	1e-08	1e-08	0.0781566213084936
MYL2	1e-08	0.0635051235025791	1e-08	1e-08	1e-08	1e-08
MYL3	1e-08	1e-08	0.028010850658634102	1e-08	1e-08	1e-08
LMOD2	1e-08	0.010871130216991499	1e-08	1e-08	1e-08	1e-08
LMOD3	1e-08	0.0050512598854652	1e-08	1e-08	1e-08	1e-08
PRKCE	0.8437585873107817	0.8162775272498647	0.8340711619168004	0.7755804079317936	0.5522257897150741	0.7328265478182084
TMSB15A	3.142632062128225	4.5881442947671776	2.658820815735972	2.93213454611597	2.8868398748807764	3.09445940600285
PFN1	1723.6518890652756	1650.1476274788308	1710.0162095772087	1599.443520401632	1679.7230514426387	1270.6193875855754
ABL2	5.009133280396871	4.541631345374524	4.602199449807632	4.335135594229548	4.242584685390283	4.903435373056585
ABL1	14.584829047290464	13.396667588871475	14.208540002768602	14.268143827747075	14.020548452181021	12.070752564586792
ABITRAM	10.459553491943337	11.555204363016665	10.11017506415164	9.701889279303337	9.00228305587432	12.436347107410683
PKNOX2	0.0059998555825382	1e-08	1e-08	1e-08	1e-08	0.0061380623455959
TMSB4X	958.2557104632097	1082.0675597631955	1057.7823374696734	1095.7135924874228	1125.6785116101755	973.8979733832736
TWF1	25.691931199394784	31.83822955071561	27.715227591271052	26.558155386895454	24.66741583358412	42.64861815091573
LIMA1	3.0806518945250914	2.9978672949659	2.5893473748979328	3.0569615847087563	3.2315866807289817	3.758592552731901
MRTFA	8.881764922069866	8.810850868808544	8.880756262197439	11.857521861370815	11.859275966439357	9.169148256913104
MYL4	0.0204309854004234	1e-08	1e-08	0.1805919497163089	0.0811589783317922	1e-08
TMSB15B	0.0909860442558213	0.0495428567677045	0.0493980717394047	0.1056068762564798	0.098571364098095	0.13539186804885509
COBLL1	0.1313573887611613	0.1931187678478174	0.1545189598358201	0.3002399786508024	0.2727577290159257	0.5106561813552843
