# Supplementary material for: Peptide-based Self-adaptive Implant Coating Sequentially Regulates Bone Regeneration to Enhance Interfacial Osseointegration
Source: Research Square preprint supplement (doi:10.21203/rs.3.rs-5132912/v1), 2024-10-01
Supplement: Supplementary file 793 [file 5_DNA binding, bending(GO_0008301).heatmap-data.xls]

id	S1	S2	S3	C1	C2	C3
HMGA1	642.0167020988642	589.0334385565993	617.5453260066582	366.4821656709323	378.2999131013855	311.2123714797673
FOXL1	4.753740949420352	4.821158803319335	5.62668472944327	2.947128593759821	3.30110400679854	2.992367760694403
HMGB2	169.33101144952764	199.37399990217614	208.03009629271864	111.23369922208613	115.2216514927887	126.74488575269608
HMGB1	53.64783124404269	61.71050378703546	61.2716868251693	39.8497156752474	40.0535932123512	47.43459738120872
FOXD1	3.5295811440244274	3.2958319744802926	3.6513335186265	2.979623231927603	2.904575130118844	2.119873638540169
HMGB3	26.25306469162502	30.828951088448765	30.678701614645824	22.448042146823077	22.84264559365122	23.247087580371062
FOXI1	0.08573274326373899	1e-08	1e-08	1e-08	1e-08	1e-08
FOXC1	1.0442367549636964	0.886377056183501	0.9149059390698007	0.8106309647764621	0.7513725099981812	0.7740310643999095
LEF1	0.42940275160545127	0.361681476745158	0.5609714255611171	0.4546745981668599	0.41310834166623067	0.288286734686394
HHEX	3.337086977534709	3.8504763829590214	4.543800299207447	3.9300861237166806	3.0127442535115274	3.354840816294168
HMGA2	14.564417314766887	15.679377963203732	14.050980697102341	13.493042738388501	14.30053623152647	17.198992790046194
TERF1	4.271720790126959	5.5113366461166935	4.623764404927994	4.6225677785716375	4.114815130945245	6.155821920928767
FOXD4	0.0113879199282652	0.056841006653543004	0.0340049400176834	0.0447374127362049	0.0565459532992996	0.0233004720819103
TOP2A	38.14715732375292	51.19326820779399	40.600782736229434	40.50652018936999	39.922257512330326	73.54927706855005
TOP1	31.401829210254686	34.55014068949969	33.94461544506241	36.28412133458627	36.139345266766	45.75858189316314
