# Supplementary material for: Peptide-based Self-adaptive Implant Coating Sequentially Regulates Bone Regeneration to Enhance Interfacial Osseointegration
Source: Research Square preprint supplement (doi:10.21203/rs.3.rs-5132912/v1), 2024-10-01
Supplement: Supplementary file 797 [file 6_FAD binding(GO_0071949).heatmap-data.xls]

id	S1	S2	S3	C1	C2	C3
CYB5R2	0.6356796495728703	0.7103500653217072	0.7460487431993943	0.158408762031368	0.1695990655367795	0.174713531965044
PRODH	0.5366173778364705	0.7457625311129878	0.8064211070353305	0.2790134124260844	0.20898349626205048	0.1291713929483849
NQO2	16.08859556499698	15.821433060347116	17.896230960215615	10.372683824007439	9.377452245171977	7.589215942951277
ACOX2	0.22529519844101809	0.12267559521180789	0.12231708557347659	0.1005763872451482	0.0508495075310725	0.041906350931856705
SQOR	82.62422514301782	84.30912817957554	85.33061627183295	62.186443719327514	61.167551406422874	52.614181305013936
TXNRD1	115.84499739143128	125.50184640373935	127.78861124574931	87.62025110771505	84.58636777607678	89.69704041673101
KDM1B	11.960200666016245	11.7936323387386	11.839966888399609	8.902823355194178	8.196028538606772	9.783027105038524
NDOR1	5.557946561027785	4.968344327568009	5.649816640287358	4.696111219702448	4.569820419002218	3.38738886312766
QSOX1	20.381261358486952	19.29263578373843	19.752036354065254	17.076767253469807	16.902083548462876	13.338323907324137
MICAL1	34.204479837821474	32.480912957345055	35.036045268123694	29.899295331925412	32.209628632717056	23.65440058481671
ERO1A	28.226984841001602	30.370518886400728	29.116208090893142	23.29668328277359	22.09064415834852	28.835242601056596
KMO	0.0042105525212368	1e-08	0.0041909810875555	1e-08	0.0041814462804925	1e-08
ACOXL	0.011716043876568799	0.0116957653504691	0.001457706929489	0.0129449455823933	0.0014543905479897	0.0014982491677389
CYB5R1	25.22741107932027	23.17823241855743	23.47684455783668	22.637711182332612	22.40303617151245	21.36851805206088
COQ6	4.052348523425391	3.786202823686344	4.076574816682755	4.213608606665297	3.616173657235787	3.3932731518128847
CRY1	5.721693504737022	5.598263930579036	6.720923036183419	5.458863254231647	5.392740146336429	6.347949571979072
DDO	0.10262114064041529	0.0866829803007471	0.1728593024322053	0.1317981000419464	0.1489479391230301	0.0484546317811136
XDH	0.6507242555552915	1.2548134394347261	0.8166646608482516	0.7542085850963668	1.035567109086551	0.7856248890081298
AOX1	2.419817584579378	2.708578354997199	2.547433658618534	2.4096367151323608	2.4413102188366023	2.60351947042012
CRY2	5.845076118316906	5.452908350851382	5.789048383653071	6.213283098732919	5.6664643800879775	4.834791641793637
MMACHC	2.0517661944106544	2.5578646454844685	2.5743593155139446	2.540149680472399	2.7263433655395084	1.911791433552261
AGPS	6.267789804199053	7.355840346047167	6.639055301281803	5.763343642921241	6.0085226994714676	8.508775430375522
STEAP3	11.423258010682627	11.852281753562597	12.015961154937859	12.337963126361712	12.287958931241711	11.08012251410792
ACOX1	4.689402025872363	4.42894248244497	4.538576292879377	4.767903987766825	4.637675333138948	4.46256454034766
MTRR	9.454518463386782	8.509118931709283	8.81583226506218	8.93757136501073	9.110848070395383	9.915734264836694
MICAL2	24.595560225582197	22.94341816900372	23.21801537937416	25.01510577499472	25.38871531719677	23.56664051712612
LDHD	3.256069487534452	3.3319493473594006	3.5660440624568985	3.719149561218624	4.125578128376748	2.819403668759676
ACOX3	3.0976320054424797	2.9235109683663385	3.404919287346614	3.4182716135564077	3.6835623811197458	2.8383535436205745
AIFM1	21.435067414991828	21.769970611294777	22.811372029169267	23.84257078811868	24.478770592040505	22.39742392151009
MICAL3	9.464643142877286	9.549204367166759	9.47432852640072	11.051602941017457	10.724747431783763	9.279217465157258
D2HGDH	3.733789227497555	4.111679280422249	3.9169608424575615	4.405733480413824	4.348205168355776	4.117503282087984
PCYOX1	23.54323787087233	24.741177110083925	22.598043447859485	25.724645509513522	24.98335342187865	27.65043011495979
CYB5R3	98.51911434714975	91.11426081809755	92.8017067820458	105.5447469001511	111.46181981160255	95.76108672668194
ERO1B	1.2707434861928495	1.3593705798222877	1.491239589584545	1.2867505673162039	1.430622015550292	1.9981139413870412
MTHFR	2.7078621892142185	2.7495817686997484	2.7646817467760205	3.5725780585787588	3.508582120186915	3.25770469899668
PRODH2	1e-08	1e-08	1e-08	0.0664227525553837	1e-08	1e-08
SQLE	13.22408444174311	13.55777975064577	12.981062956182912	17.13779728679648	16.46867037840588	17.960518078957648
DHCR24	72.23907347162071	66.58713683999687	69.39095184162734	114.18793223497103	112.8097820634108	106.44863992093107
