# Supplementary material for: Peptide-based Self-adaptive Implant Coating Sequentially Regulates Bone Regeneration to Enhance Interfacial Osseointegration
Source: Research Square preprint supplement (doi:10.21203/rs.3.rs-5132912/v1), 2024-10-01
Supplement: Supplementary file 801 [file 7_frizzled binding(GO_0005109).heatmap-data.xls]

id	S1	S2	S3	C1	C2	C3
WNT8B	0.0464652320393958	0.0463848083885443	0.023124631252697002	1e-08	1e-08	1e-08
WNT11	0.8344835190154605	0.5751937125540748	0.5438483024048743	0.23416203580952588	0.3452979142556756	0.1524474887788328
WNT4	0.0748500291789319	0.06292250778237199	0.054896295314849304	0.0270834052265328	0.0312979481197262	0.0040302307033484
FZD1	0.9176038958908487	1.1107591623597335	0.9421052643541502	0.5676861126056296	0.5811978178120709	0.5802453943909662
RSPO3	0.0091850953819347	0.0275075725332027	0.018284792580041502	0.0090209116950101	1e-08	1e-08
WNT10A	0.11108546500943879	0.1108931943722558	0.1879674933671504	0.0763698693319092	0.08825405317257329	0.056822167195738
WNT6	0.0289765766237535	0.014463216478336	0.0576837656320913	0.0142293147969866	1e-08	1e-08
CTHRC1	0.3933366204009735	0.33911184545508627	0.1779583300494706	0.12291546199005049	0.053266045030395504	0.2011985801021236
BAMBI	0.5007582633683917	0.3822699983753717	1.0555001677576408	0.4050176909512489	0.2779010841473447	0.2109442879491217
WNT2B	0.8720534720165559	0.9435967411753823	0.9792820445836901	0.6787838397132567	0.5591817910116299	0.9004596034610141
NDP	1e-08	1e-08	0.0144209489080228	1e-08	1e-08	1e-08
SFRP1	1e-08	1e-08	0.0055532344585329	1e-08	1e-08	1e-08
WNT9B	1e-08	1e-08	0.0035838749678894	1e-08	1e-08	1e-08
WNT5A	0.0050754856497078	0.0202667733472669	0.0033679325572843	0.0049847613645852	0.0016801401269692	0.0051923995020519
TMED2	64.530610536772	65.27189261770884	68.40574902009917	55.16651543406474	53.12092576263832	56.98765699988144
WNT10B	0.7259906710409925	0.7136694581035843	0.8550038078077762	0.5769422761945098	0.7264757151809093	0.6236528986343084
ZNRF3	2.0668051082887517	1.984696646979242	1.7083998824749183	1.745399428258718	1.7258195449848168	1.4778949612955985
RYK	22.470204561075068	22.07358209206188	23.200725313804703	18.96503427978861	19.81567339712509	20.91315526483584
DVL2	19.603886713295033	20.831203804074402	20.162093524599562	18.50733397114648	19.02553508624129	16.473527134936806
DVL1	30.06076088882853	29.57737839782681	30.06934000420403	28.184443292102692	28.52862765887297	23.604138275780425
SDCBP	32.181273636587086	36.509688840108254	34.57406598979307	29.304161177627964	28.908122869905142	39.085732149012536
FZD7	2.9482472182236945	2.4824310949808077	2.7724137255489905	2.8262247149031245	2.496505255779297	2.432924844427117
WNT3	1.4623469188930402	1.8153150281631696	1.2594652351727535	1.3766755089393707	1.2641243971770908	1.8293450199270656
WNT7B	22.69726736625893	20.90173463877772	21.71620848227812	21.93305452670997	22.79590061504567	20.17142893101024
RNF43	1e-08	0.0033202893718295	1e-08	0.0032665931925774	1e-08	1e-08
WNT3A	0.0777685002829545	0.0194084814568772	1e-08	1e-08	0.10297454280921639	0.0132599919342018
CCDC88C	2.3806161063681976	2.593607599291199	3.0365351237881915	2.857631966167084	2.909959416692983	2.6459250338589397
DVL3	14.66244519099951	14.495509204949697	13.615692738503952	16.07621671868618	16.673431546923855	16.10272426588812
WNT7A	3.444615780166045	3.5595202799214856	3.537066531136892	5.505620330859158	5.464869917533869	4.229993875028336
LRP6	3.5662375276799216	3.674045238583058	3.0660559181453495	4.78371545740248	4.5186573799902385	6.558644850153666
WNT9A	3.4284191590973463	3.087156105703416	3.1524339268994663	5.346572182957929	5.173267426042403	5.209269502329977
WNT5B	2.8208082160779164	2.7774394032921754	3.108292753984818	5.40193751097863	5.8961488060735405	5.015613834471644
