# Supplementary material for: Peptide-based Self-adaptive Implant Coating Sequentially Regulates Bone Regeneration to Enhance Interfacial Osseointegration
Source: Research Square preprint supplement (doi:10.21203/rs.3.rs-5132912/v1), 2024-10-01
Supplement: Supplementary file 805 [file 8_monocarboxylic acid transmembrane transporter activity(GO_0008028).heatmap-data.xls]

id	S1	S2	S3	C1	C2	C3
SLC16A14	3.0688841175370003	3.168718394033105	3.2071120343148443	0.2256994328006465	0.2995369809235221	0.17142771761820688
SLC16A6	0.1402960837557243	0.1344511245719319	0.0558575899524363	1e-08	1e-08	1e-08
SLC16A9	0.25839998210076387	0.3622314951640493	0.175114139680468	0.037797189828287	0.027299342890853902	0.1181148358317764
SLC16A4	0.0407950288585031	0.0339370178300023	0.0135351418497904	1e-08	0.020256517452181502	0.0069557990490223
SLC16A10	0.0706535107464288	0.0612507986447608	0.03886387514675	0.0346952936113759	0.0147716087154094	0.0513575682484032
SLC6A13	0.0108733385366147	1e-08	1e-08	1e-08	1e-08	1e-08
SLC16A1	26.782092636693204	31.05577392683509	30.673826075266383	24.05358960119925	23.29152219542421	27.879010637169944
SLC16A2	14.841856398630284	14.039222215286213	15.715689800025785	12.941139080278058	13.175459584237155	13.301202563913765
SLC6A12	1e-08	0.0478529328884383	0.021205821790326103	0.0104620181035158	1e-08	0.0326934085713031
SLC16A8	0.0406452307476396	1e-08	1e-08	1e-08	1e-08	0.020790752787897902
SLC16A3	173.27003086227487	162.4977773892666	163.9186103612551	163.31673393111393	170.99690982428552	139.8401804126026
SLC16A13	4.8043597309337205	5.030333688899562	6.018759524693111	4.298157137432572	5.538919645278231	5.6777052346123655
SLC16A5	9.011712229987356	8.822555961785017	7.835376816692411	9.4909463095901	10.680788569089815	9.500915913834021
SLC16A7	0.5902149337206405	0.5516216184223038	0.6930460843946109	0.7762468038632553	0.9038370795650829	1.8411846618388863
SLC16A11	1e-08	1e-08	1e-08	0.0409889918952996	1e-08	0.021348192058289802
