# Supplementary material for: Peptide-based Self-adaptive Implant Coating Sequentially Regulates Bone Regeneration to Enhance Interfacial Osseointegration
Source: Research Square preprint supplement (doi:10.21203/rs.3.rs-5132912/v1), 2024-10-01
Supplement: Supplementary file 809 [file 9_DNA polymerase binding(GO_0070182).heatmap-data.xls]

id	S1	S2	S3	C1	C2	C3
CDT1	45.46349883912313	42.98631097787253	42.953740935310094	26.58115859435739	26.144398961615664	19.128419894811504
RAD51	7.236809716504802	6.6383049882673335	7.5203448512744195	4.628491026721641	5.013260532109911	3.4401014140114943
HMGB1	53.64783124404269	61.71050378703546	61.2716868251693	39.8497156752474	40.0535932123512	47.43459738120872
ACD	23.480125093170642	21.52236650186404	22.132707343900492	16.536122160704156	17.032559539942493	16.088132882508603
LONP1	30.69679728024069	27.351371464907412	29.529629862146088	23.53473178285865	25.467417364384232	17.136815134348304
PAXX	28.295940076882	27.231550707512223	30.434749058302145	24.30881248729469	23.049624126500746	17.658751198711133
SMARCA4	5.301371565800988	4.775684017542062	4.479702401632123	3.9644438635758816	4.082098739548688	3.39440671594356
PTGES3	93.24760264328735	90.04678557609812	99.50966671924141	74.2289742328206	72.35296708515679	77.7574637853602
FANCI	17.933281372433587	19.04364289282373	16.529768044296805	12.921320747654752	12.813218460550832	17.166260070446967
NABP2	35.650202972694906	33.53159909560518	33.57124916284386	27.13571880075408	31.640912092375302	24.71510805310711
HSP90AB1	820.9612092438223	814.1342876790771	828.7675114506245	671.0532519517053	692.3043146403733	652.5260997388202
NAT10	36.60893447680053	34.530557821296576	35.85849399934712	31.33709804051652	32.67670368474143	28.602211582639672
FANCD2	7.698096468921689	8.418852656545187	7.787788772635992	6.813522675071558	6.401336613516178	8.103259536772807
POLG2	5.966580961941235	6.223420848659204	6.455949896821238	5.519774002243467	5.01855613346112	6.6838229834046174
RTEL1	0.09584514762984869	0.0956792554733875	0.023849917622562302	0.056479151687943104	0.08566433957168479	0.044123830969621004
SMG6	6.885798198221997	6.6488143668226325	5.961770198402031	6.20730451500992	6.625496205869997	5.512517403020494
HSP90AA1	168.1159154199381	218.43309286558292	185.98174191972402	164.42776654863044	156.91357148038608	238.58072486143644
PCNA	144.25169699590452	159.8896931268899	153.59270954802818	141.35848066659202	150.27316841061926	159.7950186550005
NHEJ1	2.3731130455277145	2.4182316672082864	2.4939908413439666	3.1933528831655935	2.8311107548558536	3.121428636865886
CDK2AP1	33.45588802262549	36.113895300684426	34.615681495473005	54.52389809504223	52.75488725230428	55.01376545085014
