# Supplementary material for: Peptide-based Self-adaptive Implant Coating Sequentially Regulates Bone Regeneration to Enhance Interfacial Osseointegration
Source: Research Square preprint supplement (doi:10.21203/rs.3.rs-5132912/v1), 2024-10-01
Supplement: Supplementary file 813 [file 10_Pyrimidine metabolism(hsa00240).heatmap-data.xls]

id	S1	S2	S3	C1	C2	C3
UPP1	51.407481270212344	50.59395815506146	53.211967776772426	21.18116732378923	20.593834813591737	16.51577398218477
NT5M	0.9370936651279569	0.7681515687525956	0.8644887570326106	0.4339829243068717	0.3102052775324751	0.38191304427405237
RRM2	76.66702101397529	79.567894238158	78.49797466636564	43.65649746024955	42.019063238080726	43.32329756919509
NUDT2	22.81227408244825	24.93268325486105	24.22779016325067	15.08261968870737	15.227614297650724	12.318485663185351
CDA	2.062619359664752	2.919547517966225	2.6045927028872153	2.025749974627125	1.4063374606294552	1.5432307999157937
NT5C	28.494921443156066	30.701784429509374	32.464664016064006	22.697475515959894	21.85059007220631	17.454512973218925
ASMTL	2.6753803727370897	2.6416142782275984	1.5299827636315702	1.328111071522183	1.5265019258827977	0.1393385935984238
RRM1	38.557752137538714	42.86499399337551	42.51128083907994	28.64046735115111	27.97247757950863	32.46605118917173
CTPS2	4.141103336473328	4.246324092667005	4.20955370520795	3.168092637638998	3.1402603002962732	3.059690021810851
DCK	10.58428067598912	12.312072896232385	13.730230037235867	8.794340643026368	7.895672986572603	10.756919600259344
CANT1	38.76138043285546	37.16372231411149	37.38934183766785	30.60166380662342	30.75447980864352	25.563315718529086
DTYMK	67.52626042908955	61.32826705742941	64.69630310844417	54.39438239827922	54.91921719305692	40.698657372905444
ENTPD6	28.39818376276053	26.681441112327537	28.63759542821463	23.599381342937132	23.509462586439767	18.350246448096854
NT5E	50.72666470403647	53.77282115456629	49.732296080112576	37.85078167829382	37.551129094785736	46.444555309183606
ENPP3	0.039647702777579404	1e-08	1e-08	1e-08	1e-08	1e-08
DPYS	1e-08	1e-08	0.0029666919031703	1e-08	1e-08	1e-08
HDDC2	15.977886582752847	18.29630183319115	16.96689736226075	15.00284015765079	13.18497560511575	12.505345159841735
DHODH	3.0791909907334083	2.6902135710367623	2.766320904214249	2.4856030342474282	2.2806296380703244	2.138437845492988
ENPP1	1.8951913519499544	2.3465045621987555	2.056356488548522	1.5752115990217275	1.6526483311561575	1.9080174602042068
TYMS	121.49495870878131	118.85234389651127	121.59164942913979	105.27800701780063	102.30111643746244	90.628390659669
ENTPD5	2.666392806231253	2.7486043111493097	2.9191282330208086	2.1862799707978207	2.0433296038588957	2.747277825467652
TK1	144.9186090963555	128.49410609143692	132.88919892300802	122.97952186079863	123.05275827997055	100.36702239918208
DCTPP1	27.710111562273212	27.11480144429514	26.40585033216529	26.94554412919737	26.13634895808965	18.532183321738106
CTPS1	24.172848463906888	24.00304176905077	24.352130569663768	23.189205081373927	21.580925581775666	20.6517734984028
ENTPD3	0.022571479107409902	1e-08	1e-08	1e-08	0.0089661856748644	1e-08
DUT	39.51061925682347	40.248053490219974	43.14074978057179	37.21878824895274	38.777888356406415	35.8292333300066
UMPS	5.675965774264	5.34844897584301	5.534056995056154	5.0376487887203085	4.7443712644301055	5.301114339015543
TYMP	34.81120418495302	36.51726886578733	34.916236529497546	35.47910199036818	37.35271629154629	26.425263485359697
NT5C3A	9.306034695008467	10.653341296666142	9.675938306547883	7.942981551610817	8.151316624116498	11.588860640342642
DCTD	22.82810298220821	23.29436218451364	22.577909786919854	21.574144433473087	24.028791898357174	22.21364890849077
NT5C2	10.408355158916073	10.27363104220852	10.25007205586624	9.967146535793807	10.146125105163861	10.870709215587889
NME7	12.672631736103275	11.941312590798672	10.407587701186687	10.601624748832064	10.635946215325381	14.349277749514702
UCKL1	10.914619390949118	11.499491256169676	10.708402943104845	12.84768919843704	11.714258781210965	9.543377263525093
CMPK1	35.3355910919391	38.11026838488641	37.96513236786343	35.395214010880245	33.09549156754742	46.334230274066954
UCK1	19.25532294936025	15.397901050378655	16.398923797230246	18.78905453976949	18.291791673591334	15.687421980904732
UCK2	17.24939531775461	17.490907553965233	18.079332791727605	18.858459955482825	18.52412785105081	17.798427199665138
NME6	4.2703691650593285	4.570108827931378	4.134150952174577	4.39648605650515	4.607493396468613	4.567030179340518
NT5C3B	38.4448178320648	36.208479648080115	36.97405503539115	40.470471284324105	41.31193156827715	35.06844519533214
NME3	13.550758197248955	15.859597868026858	15.138860875724403	19.595674872946653	17.331798427014935	11.066418957168304
NME2	1.1906944648103355	0.5447903910734209	0.5678891151857561	1.0232344200924728	0.6651357482231768	0.8882140887150521
NT5DC4	0.0039122561534898	0.003905484699381	1e-08	0.0153692685271882	1e-08	1e-08
TK2	8.00211667730881	8.465038223304457	7.9695818319108955	9.367433054753313	9.230192389063857	8.263089005926188
CAD	13.225399485938786	12.701439510186795	13.298686996844081	15.86570881879477	15.508258030181464	11.820633057958721
ENTPD4	9.652275112619042	9.344230834225835	9.799643056140368	9.479740394904209	10.761902282576607	12.034825193609413
NME1	21.405146405056612	22.376026752633773	23.382617037105543	25.187369346307143	26.694025530484858	24.377258311203782
RRM2B	3.703949892973853	4.28421514634934	3.819455596894014	3.943311973338154	3.751912489342052	6.184089573902512
ENTPD1	0.0061076328344347	0.0030485357723326998	0.0030396266982884	0.0014996222215694	0.0060654126360403	0.018744946756717902
ENTPD8	0.4121454310208352	0.3722480689353312	0.43953181820729187	0.5300668429515775	0.4580221507243274	0.4718343671586838
AK9	0.3068846610586365	0.2666704004291411	0.2722218171287299	0.2842209025605344	0.306342342007154	0.4473434438125809
NT5C1A	1e-08	1e-08	1e-08	1e-08	1e-08	0.002809786718854
NME4	39.91304659717517	38.36605417242576	36.530782322276	52.60227460628285	53.15384270934162	46.32888625254838
DPYD	1.5755072011991353	1.2588110663738266	1.424823835052289	2.488454017254726	2.5804490728604383	3.2296123524731533
