# Supplementary material for: Peptide-based Self-adaptive Implant Coating Sequentially Regulates Bone Regeneration to Enhance Interfacial Osseointegration
Source: Research Square preprint supplement (doi:10.21203/rs.3.rs-5132912/v1), 2024-10-01
Supplement: Supplementary file 821 [file 2_Aminoacyl-tRNA biosynthesis(hsa00970).heatmap-data.xls]

id	S1	S2	S3	C1	C2	C3
CARS1	50.413667485424874	50.163541085609246	51.132509159558104	22.92749523852521	21.82382227318832	20.645944837766613
YARS1	109.0672731782415	101.00906963189723	107.67426108660115	49.9111909840473	51.72557905087873	41.37563824144572
MARS1	118.22040238261685	116.16887218217367	118.74215518804915	61.60469776690481	60.3313307035523	51.72248224173492
GARS1	139.69221443003605	139.23785332589335	133.31087977078255	73.88063994918697	67.96571817678375	73.03680124224273
AARS1	139.80913495299205	133.55593760067902	140.04642025026757	77.18085461855036	76.67506521470068	67.08174900277339
SARS1	203.86371677970718	203.00245709155033	205.2405287461571	122.06908255856695	121.630577868983	111.48516311676765
TARS2	18.265746536395568	17.934914061758498	17.692646043741135	13.21134905998385	13.349791945334886	10.834638399547545
IARS1	50.473832858253424	53.834857608204544	50.86343732350301	35.62249627813572	35.04507488882671	39.29927352011962
LARS1	34.52589638203526	35.133787553059896	34.20666966621021	23.51026524937851	24.661668086207758	29.91065301424937
WARS1	40.134164390201	37.070398076396266	37.8037338192714	31.652500580762677	29.85095485223586	27.290826684659343
TARS1	124.43140546933292	138.3698589755905	136.61034261697077	97.15084109957203	92.68920064832191	118.8697290436828
NARS1	73.88649955868719	90.85253758880872	82.5990707647242	57.51949178204935	59.35250559686658	74.92428930670991
HARS2	15.58035000530665	15.758267181352027	16.653704315955256	11.989078951653692	13.478749743519135	11.88596560767565
FARSB	6.230399537080357	5.82785019762359	5.754246124698516	4.364660655660177	4.3219928945223645	5.291292626021866
EPRS1	38.40660465899109	47.35594269621325	40.457673779250534	30.413604137718863	28.959273283701023	41.24360087440915
PARS2	2.6110457129879867	2.859792146980642	2.9461317227375017	2.273675015593546	2.2465636170502243	2.2494242458261193
AARS2	6.762444545661079	6.436206090931291	6.127186287115683	5.842545573956832	5.562166920601284	4.166325893340009
DARS1	46.079253096985	56.41061471365175	51.36950391753078	42.1486701735569	38.3337111492028	44.24332629475478
RARS2	12.950539313070596	13.68751243679113	13.038082964001415	10.763205871521619	9.704109532373883	11.724035134413267
KARS1	103.76324631409891	106.85872047652383	107.11057392382295	90.94689118784963	85.66236761235696	87.58773711109362
CARS2	6.679341872035638	7.0184239391747365	6.814779819937424	6.614705927795441	5.963208351223513	4.911006636759758
DARS2	25.280461048605005	25.23670473188685	24.148544532123122	21.47129310697527	21.94992040102928	22.40911513132163
RARS1	39.470651452558776	47.88502529911104	46.89228570619489	35.21481361042002	37.43780597812118	45.95115202776592
GATB	5.351130334050712	5.6147339846302105	5.692502807253207	5.678808038835388	5.1679746075353625	3.95791151082624
NARS2	9.005056657407046	7.687481066918205	7.5409238630936075	7.242924358667473	7.609481443843602	7.063889038236282
QRSL1	3.2698631472870963	3.689199312032845	3.719616201165071	3.1126908388382604	2.9712718459808927	3.5871509560910186
LARS2	5.94754843104267	5.90232917906465	6.228956812373554	5.519108843298644	5.77180281091696	5.502939079794516
VARS1	33.94443687472968	32.813536248485484	32.90255202365568	33.4003974071528	32.93147163287584	28.828749278299668
YARS2	13.540891943914374	15.055931508481342	15.047061071887233	14.927985853296137	14.300156558566435	12.950148091411508
QARS1	119.62704689422499	113.13846810688159	117.84669434417735	123.7585014919856	116.77096878344815	101.13625007607459
FARSA	15.416293468698646	15.156226480254427	14.687594898814098	16.113190904865785	16.443273064297557	11.888349936643149
IARS2	40.511776625669434	42.66024362980887	39.62823764327349	39.226359888022536	38.10173306041932	44.59195569283932
MTFMT	3.3590877554737584	3.9621802081897215	3.719721770109589	3.6112297019270736	3.1908296595579566	4.165944199663218
HARS1	45.4382166078516	48.66517795299714	45.92692233251261	48.61899251050805	50.57100518005636	40.978377942659364
VARS2	13.141694172116635	12.112379158434235	11.668839930691595	13.177465379029973	12.183018085136974	11.64265604243217
MARS2	2.0898451336641926	1.93838503046822	2.006425687505239	2.020166424438393	1.8466145476279128	2.2474092473683194
EARS2	4.029825461427826	3.6775414422384207	4.230585233121895	3.919573182773701	4.384130688245672	3.799741067493525
PSTK	1.4824618560188203	1.7018803508749232	1.2542354198486652	1.4377632694758815	2.300334422119948	1.0047544223423754
GATC	9.790544633844165	9.456807494957697	9.101606484133745	9.436617762888817	10.551585107498239	10.743528041406007
SEPSECS	0.6976180738268024	0.8773986777933098	0.651222133937324	0.8477256490533935	0.6497405495557638	0.9193265815046232
TARS3	1.395080591256667	1.2713351928216845	1.2360608175492143	1.302674296325278	1.2699837432878232	1.735365328690563
WARS2	3.1705433037026274	3.3342345339157533	3.5283176111940495	4.209619004112327	3.7797540298248578	4.2549372268384165
FARS2	1.0630122343941686	1.3203365334497712	1.2117184368295912	1.5918581343923466	1.6200783243524244	1.4212855281689383
SARS2	8.563161929552194	7.591622165449627	8.176477785466384	12.101735740414725	11.074934171322267	9.027811203491936
