# Supplementary material for: Peptide-based Self-adaptive Implant Coating Sequentially Regulates Bone Regeneration to Enhance Interfacial Osseointegration
Source: Research Square preprint supplement (doi:10.21203/rs.3.rs-5132912/v1), 2024-10-01
Supplement: Supplementary file 825 [file 309_Steroid biosynthesis(hsa00100).heatmap-data.xls]

id	S1	S2	S3	C1	C2	C3
CYP27B1	3.632906510226897	3.207356288455093	2.947160846077292	3.3204790709689966	3.3366874432699736	2.073127189725043
CEL	0.1882807585241878	0.06265163184693759	0.0312342737331683	0.0513653500798405	0.0103877443969398	0.11771089120632429
LBR	19.03313711518709	19.74060577936343	19.294363799639505	15.209562442847677	16.342960200995183	22.734893721817546
LIPA	26.241667900192695	28.060721759208132	29.339927372242183	28.075092558648073	26.890656662315315	26.85414080309225
CYP51A1	29.564241850956932	30.562525317615993	33.44675557209714	32.259501920283974	30.88457343956437	35.398323100207364
CYP24A1	0.1294396268883902	0.1409624589653281	0.1405505074224876	0.2947009129640971	0.0818012711357409	0.0963063848133954
TM7SF2	14.583366124144076	14.211502701068628	15.033993319015806	16.694301921827382	15.924541663168252	13.86977725408283
NSDHL	16.47549463531996	17.481452516841824	17.013148194611677	18.010647761277045	20.293014631993692	16.974125200911974
CYP2R1	0.6940667526266838	0.8546723335493548	0.8335591568590054	0.7551326533064183	0.788325476738542	1.0608300966080844
EBP	54.34902790084465	56.1334399371998	57.776280386125244	60.574264365210574	64.81196501105522	59.994682191440965
SOAT2	0.0360424977179684	1e-08	1e-08	1e-08	0.023862234408213803	0.0491636477936689
SOAT1	7.683315159223044	7.805709070626782	7.360097773238013	7.832996407640755	7.670699095384826	10.25558918933938
SC5D	3.1690055841869342	3.36014336588202	3.637394184300809	3.4923368085349926	3.4824171844550684	5.109484335226362
FDFT1	13.763175788438724	12.946129768238112	13.191605379467136	17.17453713281266	15.428802978970912	14.601925265897952
HSD17B7	4.5579362946124835	4.408301237010708	4.607415995417647	6.010453488754076	5.104570595449916	5.7233453822395415
SQLE	13.22408444174311	13.55777975064577	12.981062956182912	17.13779728679648	16.46867037840588	17.960518078957648
MSMO1	7.061170705707079	7.926197389430256	6.390343664369231	9.148450664364502	7.874786653636444	12.258291864351756
LSS	18.72616971037612	19.45181370106333	19.108439532882304	27.96493099152992	27.90247515678808	20.970206931787494
DHCR24	72.23907347162071	66.58713683999687	69.39095184162734	114.18793223497103	112.8097820634108	106.44863992093107
DHCR7	28.269972899209026	24.934290343757066	26.576312284305732	47.52060066572315	47.388121965563705	45.82723237258648
