# Supplementary material for: Peptide-based Self-adaptive Implant Coating Sequentially Regulates Bone Regeneration to Enhance Interfacial Osseointegration
Source: Research Square preprint supplement (doi:10.21203/rs.3.rs-5132912/v1), 2024-10-01
Supplement: Supplementary file 829 [file 310_ECM-receptor interaction(hsa04512).heatmap-data.xls]

id	S1	S2	S3	C1	C2	C3
VTN	0.015316958962556	0.0152904478451781	0.0609830210280227	1e-08	1e-08	1e-08
VWF	0.014102704797914	0.028156580709240903	0.0393040095198729	1e-08	0.0028010514042031	0.0144275611248974
ITGA5	36.15573073753843	32.93859819922859	36.0393287014967	26.952065897499295	26.783319254513703	22.010269811849653
COMP	0.10157162098334489	0.13181455941736409	0.2527487251599843	0.1097316268051471	0.0806955910737803	0.072737932922505
LAMC2	78.6568234286656	78.52462717767261	80.40389339650194	63.104999838995745	61.96056064037764	52.55535337605877
SDC1	24.528616693366182	23.66682222052927	25.211459044463968	20.0993658084314	19.31487534145264	16.827739117417888
ITGA7	0.3266946148041475	0.2140222648315043	0.2743673137663718	0.11029389169961899	0.2737431053785896	0.16711002622672788
CHAD	1e-08	0.036548708178992605	1e-08	1e-08	1e-08	1e-08
DMP1	0.027196689239002102	1e-08	1e-08	1e-08	1e-08	1e-08
GP1BA	1e-08	1e-08	0.0197212462632388	1e-08	1e-08	1e-08
TNN	0.0048586442202723	1e-08	1e-08	1e-08	1e-08	1e-08
CD36	0.0042341750821346	1e-08	1e-08	1e-08	1e-08	1e-08
LAMC3	1e-08	0.0032495527965311	1e-08	1e-08	1e-08	1e-08
SV2B	1e-08	0.001796026176859	1e-08	1e-08	1e-08	1e-08
ITGA6	32.079809839682945	34.556399619494854	31.99606132740349	25.363121427329972	25.12856805029925	29.224493219380303
LAMA3	0.7939627973308852	0.8562591282569147	0.7793267017970055	0.7624904511820101	0.6181114860287154	0.6097513330890303
ITGA3	473.4087770191462	451.9850576059925	460.7880083101432	409.2592789913013	405.5662592604847	323.7915939659069
HSPG2	1.1522169634825739	1.196297392861926	1.4290645648413718	1.0555320812691162	1.2293752098765223	0.8431747828694461
CD47	6.497156986989082	7.329447789611441	6.7432390084036005	5.336414546009111	5.056900540324752	6.679488021805918
ITGA2B	0.9664338894971789	0.9075901209241128	1.3823458659013812	1.1108673976030956	0.8815511035010338	0.6884251887690368
ITGB5	60.82205507644223	60.49901056104875	62.30227260391504	56.22014350949679	53.46909397880343	46.52119480330781
ITGB1	337.2789188970054	386.8464948052394	348.68269417592273	291.6110530987299	280.3792962268746	349.7521774433717
THBS4	0.0253103342003213	0.0063166390488464	1e-08	0.0062144853419766	1e-08	0.006473347217116
COL6A2	59.41395844759738	57.21065156498445	58.43016870033693	52.25941153716671	54.12379314194629	45.309784100410894
LAMA5	54.84860323883368	57.11894535531015	57.350435445749646	52.88749311241597	54.55279970437275	41.411996030077894
SV2A	9.149808395496704	7.668569630047323	7.184752708786122	6.590643203964191	7.4040654330894276	7.226499182791541
COL9A3	1e-08	0.1203310878746748	0.10152105758443919	0.0273196395003947	0.08287371081609199	0.028457629456331603
TNXB	0.1182641797147757	0.1144819240888282	0.11414735980250669	0.11615020400225369	0.096092718997204	0.09715735442680419
RELN	1e-08	1e-08	0.0127039358538902	1e-08	1e-08	0.0043524280537357
SDC4	339.72510957926914	330.6974467366145	340.47980806663395	303.6787353425055	297.86794195738173	319.52666005040453
LAMB3	170.87538243582406	169.38369170990205	173.08956576344465	168.9112169364439	169.41038345829807	134.45655037045503
ITGB4	28.644248366289144	28.31564446852408	30.30682326149277	29.094809474286517	29.83772920018568	22.170231763507722
COL6A1	19.11010774668801	20.141795832737202	20.773007387526295	21.22442495126461	20.24320554436856	15.300769827582668
COL9A2	0.9799780480015449	0.6309628647269646	0.9119338515126473	0.94537580535258	0.8695489123204112	0.6406840544585434
CD44	208.8386877811705	208.1178700157634	206.515549146202	201.34151941475548	206.81675958258012	208.3310823602338
ITGB7	1e-08	1e-08	0.0327255466110775	1e-08	1e-08	0.0336357265499259
COL1A1	0.3020356928270785	0.2847622016229852	0.3006317712882215	0.2677971081120606	0.3915985254651652	0.2360363988767544
ITGA2	5.871478884824919	6.634794514984272	5.382720723102617	5.354854068691374	5.37362812435544	7.478361003201793
LAMA2	0.0738332302356793	0.06586443420353909	0.06254471539394789	0.09719888861733719	0.06552254154804929	0.0514273954655106
HMMR	8.918364643343994	14.005625354729881	13.41399781506583	9.545631943509822	8.897717922811124	21.018531028893726
AGRN	146.26343977596645	143.15603290741296	147.3069844096269	166.29728637550346	168.8869148097065	123.29454993677443
LAMB1	12.640369856706153	13.21882574725776	13.004814694042155	14.22391903044015	13.321385889436499	14.103217477911652
LAMC1	49.15109823641468	48.260173998015354	48.64125403772383	53.66801155444585	54.341909523451825	49.01078967209474
COL4A4	0.7915094788787531	0.8383922999418014	0.9141238055845397	0.9672509843331565	0.8860428411828692	0.898339659437494
COL4A6	0.035469308380891705	0.017703963431943803	0.023536296715301403	0.0261264726767363	0.0293534346369732	0.030238622967682
DAG1	36.03778629623213	35.59831007799515	37.12235119960798	42.75058334125879	43.07019850437648	36.763575459890816
THBS2	1e-08	1e-08	0.003550001978074	1e-08	0.0141676718067384	1e-08
COL4A3	0.1301673916016525	0.1963569358612849	0.2792788272288563	0.1818178028624023	0.2843886701988681	0.3639865140938417
GP6	1e-08	1e-08	1e-08	1e-08	0.0109052990648649	1e-08
ITGA8	1e-08	1e-08	1e-08	0.0137455424226018	1e-08	1e-08
LAMB2	35.85272163066848	35.925692716774776	35.97704916106363	47.84046831717729	50.03402411353289	39.60234382612465
SPP1	0.0142316437217806	0.0426210133193024	0.0708274213796893	0.13977243826297178	0.028266519256129902	0.1455946116375367
FRAS1	0.019281195515156602	0.0059224139867221	0.0147627505805688	0.018936543724288903	0.023566656592771403	0.022760004598531003
COL4A2	62.189987393667096	62.75346557049428	64.68138089710024	95.90923391640041	98.7064003803381	72.01410306088415
THBS3	2.9746889248734263	3.3507331878566986	2.53855203436952	4.592938406072667	4.241581538070603	4.176578067574994
THBS1	48.88344186293622	51.828011909993535	50.826783410535825	72.73989374150118	76.36521004506032	73.95435639962
ITGB3	56.463605555810794	55.53308925325314	55.157994095143856	81.91132479556963	83.89136922692305	84.98879627560113
ITGA11	1e-08	0.025058171196523402	0.0317990127268167	0.123264589625353	0.0543885654680894	0.0583632482411785
ITGAV	17.995640516428463	21.161855801644595	18.22117607502983	29.382039426865568	29.662011472684284	46.96465000537877
ITGB8	0.1942695810851496	0.1915091659052768	0.1450249357969457	0.4078285899307168	0.4823166168469907	1.0955795128643617
COL4A1	8.99435601909717	9.871565511078577	9.790260307571485	16.68373716298592	16.482981854282688	15.75469896020097
ITGA1	0.2134214918560626	0.3056834354458166	0.277081909957801	0.4852847774648168	0.430803621869808	0.5007526800322321
COL4A5	0.7003988573498348	0.8876927659265613	0.8509248654921319	1.6185392950964475	1.4695350669641571	1.443602398031407
FN1	648.6842079306692	692.4591130329909	680.8880931928622	1348.3974658506463	1359.7890207798928	1188.2794037785443
ITGB6	0.0536637872314505	0.1392843345728837	0.2563888294739885	0.4005544801352133	0.5275988818621535	0.6752690899931001
TNC	45.737991037442484	49.38816389420429	48.22971116048011	99.34960669010097	99.58858683521909	80.65334287546042
ITGA10	0.044505655127083904	0.0488714844994383	0.0398689066844212	0.1704694208103614	0.128174183047587	0.0910616800735129
NPNT	6.116920707695272	7.159149413623388	6.277441128682607	16.510488624844793	15.11327599963415	19.77148796792401
