# Supplementary material for: Peptide-based Self-adaptive Implant Coating Sequentially Regulates Bone Regeneration to Enhance Interfacial Osseointegration
Source: Research Square preprint supplement (doi:10.21203/rs.3.rs-5132912/v1), 2024-10-01
Supplement: Supplementary file 833 [file 311_ATP-dependent chromatin remodeling(hsa03082).heatmap-data.xls]

id	S1	S2	S3	C1	C2	C3
MACROH2A2	1.2633153222595164	0.8235942770396605	1.2702742358313845	0.4937613054941938	0.4608670087412487	0.3428858471898509
DPF1	3.5175998101908816	2.610160900589204	2.639979429628148	1.5426167834083648	1.541154569612446	1.5587639663535366
H2AC20	2.0670439766756346	1.0568973595171147	2.509068226891828	1.1883485903734443	0.5507391832596165	0.412616289944436
H2AZ1	430.4370766258313	478.8136695168592	476.0976063881149	316.14634893702373	303.45289058804025	308.10238680093505
BCL7C	11.276575411638733	11.104333163000582	12.930942558536575	9.203086053165984	8.68542216561402	7.167003275917392
SMARCD2	26.936348465373303	24.67538797078993	25.814342334912325	20.342114687017055	19.74194193127676	16.53601221590174
TFPT	28.215177037984787	27.8400114070423	26.518154688991146	20.788138848455116	23.779577731215124	15.383580560381235
CECR2	0.06896410844973039	0.0409347160767635	0.0909063193220829	0.053086754007976404	0.0333181899718639	0.0362297697997911
SMARCD3	21.51484929244514	19.895554490423823	19.273359620300344	17.706034862942406	15.137516946287471	13.65826720951053
RUVBL2	87.5320438024513	80.35906957869692	85.92989325296384	71.2298530639085	72.01488800644688	52.888654885645295
ACTG1	2524.863258273455	2333.5870698742074	2403.045828109124	2010.1510994502476	2096.981779976071	1596.2915682901662
SMARCA4	5.301371565800988	4.775684017542062	4.479702401632123	3.9644438635758816	4.082098739548688	3.39440671594356
H2AX	74.27804309685656	68.57421373620386	71.53479571188596	58.63067060925413	57.63828874914055	54.35105010622366
MRGBP	31.828542033666288	31.059746433277986	32.01388700680071	24.860141479483328	25.694842385678054	25.54386394010307
MEAF6	13.868474439323997	14.075649405021105	15.307521907296762	11.38235529975828	11.51985696275709	11.85109905601399
H2AC14	0.3139331068039855	0.7312427140076397	0.1041579679113078	0.2055476986220173	0.1558814948683635	0.2141097182904951
ACTL6A	43.85281143740594	55.56752523662471	54.766495234032114	41.11418471159103	41.078951060262945	45.74709454398153
RUVBL1	30.66537614658104	32.258362243655185	35.53571217540885	29.38445223694441	26.970890357745294	25.66988105515617
POLE3	38.35732762587956	41.667292606879776	39.98251094007771	33.42243482380784	33.98088073611915	34.073181087673525
ACTR6	8.101052308451724	8.330357308159572	7.620980543600424	5.337021486420037	6.464519757839731	8.346334182744801
BRD9	14.835912675766702	15.15640500621457	15.890347919695177	13.423697753921164	13.950393009158566	11.563133599267784
MORF4L2	142.95978875246178	160.83635118833686	154.6398481889884	121.61936024059113	122.32532353287077	146.7046314117945
ACTB	4407.849949629919	4078.6853602884253	4191.890244775874	3757.026175948939	3880.6547691106707	3316.945535142073
ACTR5	9.436070464517911	8.541213376402546	9.139155388851552	7.097004048126747	8.933859433315504	7.412634469107803
BCL7A	2.5135659658812104	2.509215396962014	2.7638596297569653	2.4363239081901087	2.3066890579490433	2.0531339234487507
H2AJ	118.82266446289947	116.77238329772321	112.47278690334376	108.49271146412121	105.87403407459307	89.95750327177318
HDAC2	10.063747567439284	11.931407083490624	11.620276353621964	8.761853722007187	8.867035208368817	11.99417021505051
DPF2	18.30259478855963	15.893804147488039	18.855855531693155	16.168033247942507	15.938678230835016	14.713498349467367
H2AC15	0.20084967946061438	0.6516316131680984	0.2998741307607814	0.1479446165283471	0.2493265785394524	0.4109525146220794
UCHL5	3.864799120227643	4.41359679922634	4.128801716019805	2.8385064323072706	3.215147982261223	4.7680507081771495
CHD4	63.59296055472143	60.644769925292046	61.8748265912966	57.409912160228004	58.02788199253594	50.601403809125884
CDK2AP2	85.79303196280117	79.061961167306	79.3503098923786	79.08789900213154	78.3924523470003	61.22252999858418
EP400	8.477428340365774	8.197725198845676	7.675515113336419	7.5874511365545185	7.2374132555376995	7.0762483372080505
H2AZ2	39.65215992772788	40.748211345910896	39.86667197365289	35.13160143877897	36.26104939387408	38.52802887945367
YEATS4	11.451714815077267	12.939210145764612	14.860247084212748	11.646908925032717	11.490490063539191	13.416423536238268
SMARCA2	5.192750826811741	5.7744111871687815	5.3954037468695	4.930293499193361	5.350282546269833	5.034153031796634
RBBP7	42.0600876379597	45.991883637090844	43.68803587875443	38.90930131040235	39.632823437021855	44.76855509292646
H2AB3	2.2334755221745475	1.4303156882281411	1.0066840296097976	1.572735454921764	1.7995387760945656	0.7760118461391551
MACROH2A1	15.995749589323	15.632035306037272	14.967952261949637	14.158867110743001	15.577634402243751	14.223247740253337
INO80E	13.98960609170734	12.217042293259674	12.622485579933725	12.861951933395165	12.579570217126705	12.14716155735677
VPS72	39.989336896827524	37.49297852402562	37.98842084698045	36.96518411275222	39.80821335064153	35.330302106147926
H2AC21	0.2505569417214908	1e-08	1e-08	1e-08	0.1990599343389431	1e-08
HDAC1	88.19942615121153	91.37697713838847	92.53724488176043	88.17790377382121	94.07712505372992	83.76201223157923
SMARCC1	41.21495909450058	40.14584591274237	39.42380347193205	40.020141454574215	39.33800358643104	39.40953028327658
H2AB2	0.1264231521985593	0.2944767672822644	0.0838903449674831	0.2897144340645354	0.167398964985541	0.0431117786743975
H2AB1	0.1272846386871355	0.5082572897872522	0.08446199972024279	0.4583678539628973	0.2106745892088048	0.043405555632996404
SMARCE1	19.532571865141026	23.235343421498676	20.47668599120766	20.475303736658738	20.843120184787068	21.81303976892861
BRD7	14.334696570445965	15.370601923364617	14.978347255959806	14.405779996313141	13.818972173295725	16.381684800671835
MTA1	23.58130434799006	24.081210200458973	22.99245734650416	24.55152446702233	24.869032579671202	21.370613604929733
H2AC7	0.0488340472806199	1e-08	1e-08	1e-08	1e-08	0.0499589419344488
TRRAP	15.911757157268672	14.630147946681651	14.01973655037138	15.157686325699402	15.377477066074695	14.20314980934327
MTA2	33.37513680891166	29.878254451068422	30.8765586283762	33.051894515736564	33.09960426843332	28.480212518484322
DMAP1	17.713972350557377	17.86885157383307	16.76357160118594	18.21173761332263	19.40888541986705	15.4307711508325
BAZ2A	22.4964203956998	22.501583200225078	22.148715919380003	22.992666546800372	23.450599802273175	22.062883964845106
NFRKB	6.799446036024048	6.081363338727171	6.553044669397818	7.383220430496112	6.583808043059522	6.022322168643563
DPF3	0.4202401299114214	0.5370416282147895	0.4687415940767306	0.4223640051942273	0.5131435862142948	0.533636582543857
GATAD2A	12.611356319134734	11.515148275215045	11.162184225842037	12.77891689315619	12.966086622554748	11.25383758740558
BICRA	3.666358714736536	4.094908494825601	4.014248429467151	4.104937578876592	4.433470298375937	3.9229096306719384
PHF10	23.81352279503772	26.21608015506393	26.516972253812625	25.464769127776304	27.64365471283957	27.93642611100958
KAT5	16.000709089763667	15.89867200853945	17.419428502890277	18.588061192814905	19.091364575398728	15.1720645420278
MTA3	8.188980758403241	8.333165273278569	8.466707763816933	8.503070026620705	9.151107341363504	9.134953589742265
SMARCD1	34.532335839429955	33.465909184907176	33.093710823746186	37.02157560554915	36.94489573742643	34.726623862565106
PHF6	11.844554742276328	13.405968075326687	12.869491354309508	11.860830536003245	12.42423342240179	17.223531607972426
ZNHIT1	78.44932388293678	75.6333187852953	77.75380865243615	88.02147145332681	87.9374295374442	76.30636989800979
SMARCC2	38.271706073199866	37.41742162880454	36.75514444403444	41.41144469947597	42.92862027212825	38.91899524033528
BRD8	17.43646136912835	18.174603764928513	18.936120767333698	19.5415238896169	20.270993399828534	20.11708653441177
BAZ1B	30.10372084075843	30.25120719024456	28.007510085490146	30.95868250756796	30.43509256486209	35.995629918789504
ACTR8	3.311044193815142	3.714542588473855	3.2830989345510586	3.9104896991839277	3.6409802687029846	3.8346548235352738
MORF4L1	70.50757964876483	74.23158079111839	78.55771743170112	79.80007280328095	82.55839740165374	86.75358335716652
H2AC16	0.3100252259309069	0.412651494419249	1e-08	0.5074725192535283	0.20525474526235418	0.3171666733182853
ARID1A	15.206902174145869	16.39259823254613	15.687097354147244	17.214612953394457	18.84269515636375	17.083862210872216
YY2	0.1989534952173406	0.2798583288177386	0.3600522101872369	0.1509887442346917	0.3502522352597798	0.6198608321496434
MBD2	16.621698856453815	17.574572202934707	18.0870218206612	19.44441491887221	18.900913677444958	20.59278814372256
INO80C	4.895191264302146	5.205151277443544	5.104458278398298	5.506551709670527	6.238126190663155	5.447246312645769
SMARCB1	17.877726737241645	15.803765111142042	16.740656232574043	20.328294116711433	20.20624274445227	17.604594167964876
BCL7B	34.128015778113266	35.907498884889435	33.122230625795886	38.766294084112474	38.935730897120145	41.46591351559256
ING3	1.8578812934925732	2.7306301160920343	2.879000268126128	2.622632947883404	2.54432395919112	3.9897607334296703
INO80	4.662238814981016	4.872718199315238	4.220093080010584	5.369306705467817	5.484357236447023	5.447855461269596
SS18	37.07304586450371	40.76427046969257	36.87683519293268	41.0124831765381	42.65597382210668	53.9350659707519
SS18L1	2.6946488464298963	2.9759633079060017	2.8039032834063446	3.0128276932624765	3.48801477397757	3.706155427912134
MCRS1	23.29758310631331	21.7532086671822	21.085748850502313	28.690802047779933	28.227776229694904	22.84115066884864
H2AC17	1.176228464418218	1.0720889025286544	0.5599292375396384	0.8538459526742117	1.9299002826207798	1.2556413382908707
BICRAL	3.886631032546353	3.632250473331149	3.2494516249076466	4.272673849278803	3.9704509275998863	4.943532607827144
CHRAC1	23.35943992274541	24.451388451948322	24.349955889204356	27.99955536941031	29.009915041608558	32.082454147541846
SMARCA5	8.871156649627668	9.900896798776007	8.946062492373436	10.055920449156348	10.193913396568588	15.349108146586094
YY1	16.348191746647583	16.662350978607506	17.28897763167669	19.275396520109783	20.91382089844553	22.39848387379735
RBBP4	20.155819452524433	19.227641080303396	20.02787424416755	24.63225658880613	23.73578910316952	25.866362544015512
H2AC4	1e-08	1e-08	1e-08	1e-08	0.09386412992073499	1e-08
GATAD2B	8.446138906836216	7.917587293689723	8.12654978843809	10.281958277070935	10.017786311148793	10.958100514449695
CHD3	47.86431740556858	46.0584062757965	44.96731217213329	62.58414386918282	64.76887828632239	52.03513135219409
ARID1B	5.126142985706208	5.494774034982287	5.590975744020938	6.702548392473621	6.544567838570305	7.877647897394157
MBD3	16.509998482238345	14.677398476069511	13.495004413155497	21.711743886002306	21.58818553117073	15.333203939941178
SRCAP	7.367091877748799	6.542139827755146	6.776752715148968	10.298142583657032	9.634638725553753	9.247132408869906
INO80B	0.189795294604611	0.2105186546762044	0.1889130886164448	0.269248337094209	0.2722536448759338	0.5177792876271415
H2AW	12.550347591119332	12.626124032531912	13.609973177077556	17.74561712770083	20.4655069567176	18.43484589381164
RSF1	1.6675951034675875	2.458046539705193	2.1720612090240383	3.3736701725635343	3.443671620443291	6.966200304566708
EPC1	3.57742561387508	3.7429761751297184	3.832767385249949	5.203129463165992	5.075279887103784	6.600120995448066
ARID2	2.5644018333986445	2.482051350474952	2.1196698256607642	3.7203556621143	3.4961417046480783	6.130942244596888
CDK2AP1	33.45588802262549	36.113895300684426	34.615681495473005	54.52389809504223	52.75488725230428	55.01376545085014
H2AC18	0.1869070194792959	0.18658351421208058	0.232547795955828	0.688372663265105	1.392112332651802	0.3824248548265504
BAZ2B	0.6196882840253195	0.6077245842260794	0.48432447628568	1.4529524029736816	1.1311309108881498	2.94212326807761
EPC2	2.912300279748944	3.1886072664669043	2.8052548383200357	4.4481874728855235	4.694249561866721	6.955271206949031
SMARCA1	24.071757387460107	28.136615953387825	22.90166469125948	40.24686560151106	40.04822067933857	62.21759123609165
INO80D	0.9153716476727565	0.7690289090473358	0.7156627183852645	1.4879643156076008	1.4850717981563892	2.699654885402469
PBRM1	4.511368652999358	4.6576103785412535	4.202398989963462	6.853301035634821	6.74541699157646	8.937033343646938
H2AC11	2.3743445812301434	1.4624854180152793	2.061609245899679	4.316501471062364	2.909787727542786	5.426573651155652
BPTF	3.4917439230656497	4.239159519756388	3.393937687767848	6.502995935803452	5.914994748442661	9.708442366457232
BAZ1A	3.3424540837733665	4.178974271626639	3.5541218314423477	6.317210495240532	6.452489991176303	10.30004363648531
H2AC19	0.09327850817646509	0.1862341069008221	0.1392673919263554	0.824500289079328	0.2779010841473447	0.7634173968634883
H2AC8	2.0714321909748468	1.442683874773293	1.006927425165796	3.5956930388153285	4.640464174630614	4.928250548988187
H2AC13	0.4528247193293851	0.5022677258840353	0.3505599249095734	1.3341913706920034	1.9486760268998655	2.05891356851062
H2AC6	12.284724301633418	11.880228295534526	11.702216822732868	42.88778267065175	40.7930933295401	45.8524810074092
