# Supplementary material for: Peptide-based Self-adaptive Implant Coating Sequentially Regulates Bone Regeneration to Enhance Interfacial Osseointegration
Source: Research Square preprint supplement (doi:10.21203/rs.3.rs-5132912/v1), 2024-10-01
Supplement: Supplementary file 837 [file 312_Cholesterol metabolism(hsa04979).heatmap-data.xls]

id	S1	S2	S3	C1	C2	C3
NPC1	15.503402819047317	14.997809382087153	16.028040516456173	11.405807717511628	12.19460982197274	10.943932288745572
OSBPL5	11.111342859374252	10.68950170675797	10.288403189580599	9.568663789829538	8.707920949644283	6.522749425611804
VDAC2	85.73351228948842	82.02997423680823	87.40969701423589	71.60245378550874	69.75210639353578	57.01410794202104
VDAC1	176.68281256827518	179.14782918872524	185.85235127006945	145.3980420973357	139.06145742601024	137.1906799871411
APOA2	1e-08	1e-08	0.0522987314828929	1e-08	1e-08	1e-08
STAR	1e-08	1e-08	0.0386582462306296	1e-08	1e-08	1e-08
CD36	0.0042341750821346	1e-08	1e-08	1e-08	1e-08	1e-08
ANGPTL4	80.7545119200478	71.12765989721267	78.36301321422914	68.43844346510471	68.05107884766367	49.95458768949804
NPC2	115.00213149725916	121.99009509144048	122.91935606624506	97.99294154685627	101.9431851903026	95.04427678437952
STARD3	16.39006229548493	15.255868974216272	16.426387550856845	14.787119387351915	13.85956982832331	12.60461586281095
VDAC3	47.657302975468	57.374427555214815	54.38337285618781	45.492716561363494	45.01235121363443	50.42634735413969
VAPA	15.114370615686527	16.634386234926335	17.084545118407554	13.949394266516538	14.079243964185824	15.72883933963655
TSPO	99.7322250260462	93.23344477097407	104.89262366002744	101.21376662382501	104.43393801123979	75.30375593703019
LDLRAP1	5.559301794109032	5.6668437988019	5.603554163531343	5.994010835603407	5.672394853654724	4.582707880424351
LIPA	26.241667900192695	28.060721759208132	29.339927372242183	28.075092558648073	26.890656662315315	26.85414080309225
VAPB	22.223634965374842	21.200714523535588	21.28757701178541	21.19527741883895	20.992730212594246	21.332891490835266
LRPAP1	9.355602993674891	8.865775279248284	8.965641027361976	9.81123235001762	10.24748905393682	6.910029076326801
CYP27A1	0.7658209237857294	0.4630042686657294	0.6763726479047855	0.6250109765721887	0.706968788493505	0.6289762557056858
APOE	0.1941594353325854	0.26430460180999027	0.4392203144452739	0.5027250797622834	0.3856345267827789	0.10834468166506979
CIDEB	0.018303801533402303	1e-08	0.024291625857806202	0.029961027817271002	1e-08	0.0249672371303958
SCARB1	6.685297311700148	5.696679405697172	5.9772422536545085	6.489766675296176	7.215679187894177	6.250967170670217
PLTP	0.8033986878424576	0.7649923772695308	1.3778831494956927	1.2503216077370056	1.190630269609939	0.9104178663935296
LRP1	14.850089435632096	16.20053192906385	15.500348562861916	18.320135061374806	19.230668678264824	14.14042324147918
SOAT2	0.0360424977179684	1e-08	1e-08	1e-08	0.023862234408213803	0.0491636477936689
SOAT1	7.683315159223044	7.805709070626782	7.360097773238013	7.832996407640755	7.670699095384826	10.25558918933938
APOC1	3.6572189912949735	3.711234218931977	3.640219514769227	4.363647724884647	3.872065825880661	4.45265044842952
SORT1	23.950451415144826	22.87190556295233	22.64716873547141	28.077116024596037	28.78280463002514	29.69215248645493
ABCB11	1e-08	1e-08	1e-08	0.0032003469025278	1e-08	1e-08
LCAT	3.163113788403793	2.310062188569589	2.7341464051718303	3.2700768744411848	3.9513594673450334	3.3381650074381737
LIPG	0.0573660476517775	0.0127259536629891	0.0338366849467889	0.07094745481868979	0.0464195888415373	0.0543402575826841
PCSK9	1e-08	1e-08	0.006815955554823	0.08070446404240869	0.0408026422778889	1e-08
MYLIP	1.4800633489873027	1.400145498631927	1.3729146736448798	2.412531266343609	2.2239867953590085	1.87882269292372
NCEH1	22.74798691562037	24.30067037840125	24.653686131142962	36.08948620228574	35.94991677116787	41.64372787201713
LDLR	8.695818097400482	9.54549950435953	8.402929254008493	14.89043702556333	15.97391822841297	13.792178861319114
ABCA1	0.8207665493446245	1.144217792231785	1.0289301215112439	1.5322861422833474	1.4780983634443416	2.068582035091347
LIPC	0.22202618326967968	0.3495122093439567	0.250743374476356	0.7841681421628239	0.530027345828769	0.7294706482405298
APOA1	1e-08	1e-08	1e-08	0.0187578128727147	0.0189671845391976	0.019539162827123403
