# Supplementary material for: Peptide-based Self-adaptive Implant Coating Sequentially Regulates Bone Regeneration to Enhance Interfacial Osseointegration
Source: Research Square preprint supplement (doi:10.21203/rs.3.rs-5132912/v1), 2024-10-01
Supplement: Supplementary file 841 [file 313_Vitamin digestion and absorption(hsa04977).heatmap-data.xls]

id	S1	S2	S3	C1	C2	C3
SLC52A3	0.1550286997797459	0.2785686591457675	0.3780548201965988	0.0913545382764521	0.1231656276737687	0.1427398155269967
SLC19A3	0.3882475234839128	0.2189084060900468	0.250472235577712	0.222429429976799	0.23562225444883128	0.1176861776053991
AWAT2	0.0462066129927944	1e-08	1e-08	1e-08	1e-08	1e-08
SLC19A2	1.7525486376409407	1.975038715216896	1.8466135254929998	1.3581515600538903	1.3733110355692588	2.038044289381956
PLB1	0.0898137821352909	1e-08	0.0536377899846186	0.0264625144493545	0.0490561137847548	1e-08
TCN2	2.5109873922530457	2.245769117381127	3.2117904712870065	3.1133160729286486	2.516196460092313	1.731924844716592
MMACHC	2.0517661944106544	2.5578646454844685	2.5743593155139446	2.540149680472399	2.7263433655395084	1.911791433552261
ABCC1	10.202609150545527	10.551882659361555	10.377436939389654	10.782719889652434	11.257868351665536	9.812072059669024
SLC19A1	3.1452124585165806	2.8206163103898247	2.9184464856081074	3.374695130920774	3.4924519385900084	2.766836243848528
SCARB1	6.685297311700148	5.696679405697172	5.9772422536545085	6.489766675296176	7.215679187894177	6.250967170670217
SLC23A1	0.0831009743413953	0.0331828621004467	0.0248144183912825	0.016323116403750403	0.0660212194737769	0.11051976933446639
LMBRD1	7.496418555456461	8.69235279796178	7.984883460845905	8.95209914228391	7.456331036203389	10.243595529623892
SLC46A1	4.685166557021856	4.542787717525409	4.544387025765545	5.2215465068776705	5.472766812984201	4.525532782171858
SLC5A6	7.197197203190617	6.394141233216593	6.7834286563643875	8.71287125297563	8.230600386497246	7.7041271873056365
BTD	1.506724558055681	1.8857806325073119	1.6959881877247016	2.5175678773439	2.4350523266297706	2.2836600480745624
CUBN	0.0087793948748999	0.0052585235228975	0.0087385865591128	0.017244916194317502	0.024412357602058003	0.016166923252899
APOA1	1e-08	1e-08	1e-08	0.0187578128727147	0.0189671845391976	0.019539162827123403
