# Supplementary material for: Peptide-based Self-adaptive Implant Coating Sequentially Regulates Bone Regeneration to Enhance Interfacial Osseointegration
Source: Research Square preprint supplement (doi:10.21203/rs.3.rs-5132912/v1), 2024-10-01
Supplement: Supplementary file 845 [file 314_Fat digestion and absorption(hsa04975).heatmap-data.xls]

id	S1	S2	S3	C1	C2	C3
SLC27A1	6.665336905764459	6.690834443690558	6.578966238329384	4.785158365874828	4.6973422724930405	3.66245607030869
MOGAT2	1e-08	1e-08	0.029397690382912803	1e-08	1e-08	1e-08
CD36	0.0042341750821346	1e-08	1e-08	1e-08	1e-08	1e-08
MOGAT3	1e-08	0.0825645660357318	0.010290418461142	0.020307336646758	1e-08	1e-08
DGAT2	6.388809487872837	4.930530903822689	5.921239841320876	5.302486750606517	5.103517688821532	4.244804483675674
AGPAT1	30.01534537504336	30.785158238527437	29.473876485448823	25.36017515671553	27.571304739289488	24.9864761173462
AGPAT2	54.57914382399589	49.724503882519514	49.06607865660237	50.34429281610339	49.002443813418644	38.89428880450366
CEL	0.1882807585241878	0.06265163184693759	0.0312342737331683	0.0513653500798405	0.0103877443969398	0.11771089120632429
ACAT1	19.989454826556848	24.268273231059005	23.090421026487174	20.52261550794061	20.64616869128517	21.283272301425743
DGAT1	8.411530024020319	8.35830502848857	8.012603352837068	8.565499323652958	7.7315277167213825	7.759950751762179
PLPP2	49.910672654345206	47.72887162007724	47.57280612164885	50.45831407924808	52.42775710270318	41.92540202000639
GOT2	94.62184726429271	87.41325423612265	85.40685808984139	91.6574585437852	90.3716845493472	89.95022121376066
SLC27A4	19.478450546801362	18.16325628565643	19.571537481677737	21.810322670201224	21.427802493553123	18.14203104275139
MTTP	1e-08	0.0061494663285332	1e-08	1e-08	0.0122350807885796	1e-08
SCARB1	6.685297311700148	5.696679405697172	5.9772422536545085	6.489766675296176	7.215679187894177	6.250967170670217
PLPP1	9.415105376437408	8.356021770034321	8.099028507721652	10.812693239449265	8.681187869291557	9.631982830805581
PLA2G12A	2.9586745813991246	2.9630811949690674	2.9069230829123307	3.604114693558044	3.416867997538027	3.6126654463021657
ACAT2	28.051011177436187	26.527927254455076	27.92062453438769	36.84473360524055	33.49371793828904	31.80334579054429
NPC1L1	1e-08	1e-08	1e-08	0.0045330298194996	1e-08	1e-08
PLA2G10	1e-08	1e-08	1e-08	0.0156095664428972	1e-08	1e-08
ABCA1	0.8207665493446245	1.144217792231785	1.0289301215112439	1.5322861422833474	1.4780983634443416	2.068582035091347
PLPP3	2.602393160774743	2.430773190447027	2.794793832085816	8.564424234912616	7.775880936210808	8.267264511783134
APOA1	1e-08	1e-08	1e-08	0.0187578128727147	0.0189671845391976	0.019539162827123403
