# Supplementary material for: Peptide-based Self-adaptive Implant Coating Sequentially Regulates Bone Regeneration to Enhance Interfacial Osseointegration
Source: Research Square preprint supplement (doi:10.21203/rs.3.rs-5132912/v1), 2024-10-01
Supplement: Supplementary file 849 [file 315_Bile secretion(hsa04976).heatmap-data.xls]

id	S1	S2	S3	C1	C2	C3
ATP1A3	17.274058021280037	16.51830382031173	16.334752934606385	12.520406066953244	12.666905368672955	10.76168557169405
ADCY7	4.047303654674049	4.401625939995487	4.643499998574463	3.7846483354705134	3.158819765024795	3.3588067697385333
SLC10A2	0.0074344455263033	1e-08	1e-08	1e-08	1e-08	1e-08
ADCY4	1e-08	1e-08	0.0066818412622348	1e-08	1e-08	1e-08
ADCY5	0.41734394353771487	0.2930717420580717	0.23205329933481939	0.299639273177872	0.2343836964818354	0.1855056708175017
ADCY9	2.90008528261828	2.401899946048604	2.84714573743382	2.1534058856199856	2.5741663206705803	2.305500421016828
CFTR	1e-08	0.016383701556019602	1e-08	1e-08	0.0040746715484536	1e-08
BAAT	0.0268883868022846	0.0335523068100671	0.0066908585783781995	1e-08	0.026702515370163202	0.0137538859981478
AQP1	0.10852009284582209	0.1444430132607683	0.1800261100936184	0.1243436734873932	0.1347124043306845	0.12027151280515459
SLC9A3	0.9146162545860849	0.7608610053490833	0.8835894984990946	0.8146052962310912	0.9171986226764028	0.6467231054826675
ADCY8	1e-08	0.004722185106602	0.0376670094042032	1e-08	0.028185987890727803	1e-08
SLC9A1	8.721958390919871	8.422722094528813	8.494230274749885	8.625955582800545	8.338620240558328	8.324891339346296
ATP1A1	103.79521529443588	102.17464250378912	104.53014332598435	105.9292741223	106.65179741969263	98.40096747139964
SLC27A5	0.6307573756430039	0.6392060267802776	0.894175694724397	0.8916794497052595	0.6833423289317672	0.6257327568689222
ABCB1	0.0347536943022727	0.0043367014244304	0.0043240277887478	0.0127996829178545	0.0301992720257798	0.0044442896592654
RXRA	9.65808036854049	8.54714017012854	8.995052302742804	9.888723141876484	10.039540777101736	8.026648848063408
ADCY3	9.37190888822393	9.319372517785517	9.5320220892348	9.548266220442011	10.539944966788632	9.457535046990072
GNAS	237.20036142999922	241.5142957472041	238.38227385026582	267.7413351837627	268.2104567542184	215.1116677080019
PRKACA	11.868676778266261	11.826407645278815	11.67631037129775	12.646900834114655	13.004199851654588	12.127228771507024
SCARB1	6.685297311700148	5.696679405697172	5.9772422536545085	6.489766675296176	7.215679187894177	6.250967170670217
SLC4A5	0.317533773147257	0.252059707049638	0.2665547840095835	0.2216820870837456	0.3039409697433325	0.4187801813767857
ABCG2	0.0134478280416394	1e-08	0.022308859876612002	0.0088049685838805	0.0222581053915709	0.018343462330143202
AQP4	1e-08	1e-08	0.0170903884783807	0.0042158278121372	0.0042628841122222	0.0351314202538006
ATP1B1	24.00624858942968	27.319306627686142	27.060481889338437	29.029900780772913	28.661934260236432	31.41190391022848
SLC4A2	51.32039514994741	48.46718182408724	49.025350493310604	57.51996111444413	58.5432255474241	53.852856040011616
EPHX1	19.292438788870548	16.76756526933797	17.798194759661467	22.82604910338955	22.547471346866423	16.84957399232296
ABCC2	0.1946531655940796	0.11931700132991789	0.0407891403708618	0.1576344844910109	0.2170471124740539	0.12926437934088159
SLC2A1	62.528348170589574	57.57844812597744	59.043772912512885	72.67216280766127	71.14448167719048	68.35072811031698
ATP1B2	0.0583263777122158	0.0072781867963289	0.0870828928438803	0.0429628465562413	0.1520483436011087	0.0969636278938512
HMGCR	9.279629116810494	10.23478783860901	9.501940356803255	11.194543689439682	11.917839650262986	12.428807466862892
ABCB4	0.0031100698168227	0.0031046868152172	0.0154780282210859	0.0183268144051099	0.0185313753340012	0.006363410421221
PRKACB	2.974838042444816	3.1606779184505536	2.8900656437939203	3.2532511739306695	3.23740729658379	5.749002091530388
ADCY6	6.324472718664228	5.974965612132277	5.93875030220696	7.765820274037135	7.99595430531301	6.958471041485095
ATP1B3	58.143967559841364	63.696901018327644	60.00772859554783	70.86431843780365	69.03065692035788	87.81790252992299
SLCO1A2	1e-08	1e-08	1e-08	1e-08	0.0018437070256514	1e-08
ABCB11	1e-08	1e-08	1e-08	0.0032003469025278	1e-08	1e-08
SLC51A	1e-08	1e-08	1e-08	1e-08	1e-08	0.0178175311794188
AQP8	1e-08	1e-08	1e-08	1e-08	0.018212966994929	1e-08
CA2	0.7653375468947355	0.7003451349650635	0.8093913628344779	1.7382070644226804	0.9817273641261512	1.092891626005197
SLC22A1	0.011005471340307599	0.032959248094909	0.0109543157812157	0.08106554782375179	0.0273234695659673	0.0675538463762322
ABCC3	25.79882481730869	24.74218587964794	25.084606408348233	39.508371581141404	40.10719301152929	37.6165424820645
NCEH1	22.74798691562037	24.30067037840125	24.653686131142962	36.08948620228574	35.94991677116787	41.64372787201713
UGT2B7	1.3848620547684707	2.034988602647595	1.9297949152517664	2.7855003597247046	2.541533899410703	4.023605271001765
ABCC4	7.3273292617718475	7.993908993300314	7.09259570811536	10.81309277958514	11.659577545782534	13.96417235463738
LDLR	8.695818097400482	9.54549950435953	8.402929254008493	14.89043702556333	15.97391822841297	13.792178861319114
FXYD2	0.07282269717285429	1e-08	1e-08	0.5006468656202937	0.7955121491527792	0.7077515457380257
