# Supplementary material for: Peptide-based Self-adaptive Implant Coating Sequentially Regulates Bone Regeneration to Enhance Interfacial Osseointegration
Source: Research Square preprint supplement (doi:10.21203/rs.3.rs-5132912/v1), 2024-10-01
Supplement: Supplementary file 853 [file 316_Neutrophil extracellular trap formation(hsa04613).heatmap-data.xls]

id	S1	S2	S3	C1	C2	C3
RAC2	1.0125358436643108	1.206905443799017	1.3387584229109966	0.17810807999529168	0.4052162000340227	0.340133029602255
H2BC9	9.757294341978419	10.49380764543431	12.555768390944927	4.235528139180963	3.5333136670162397	4.301658694745401
MACROH2A2	1.2633153222595164	0.8235942770396605	1.2702742358313845	0.4937613054941938	0.4608670087412487	0.3428858471898509
PLCG2	3.6010171855636486	3.4542062563947313	3.627187313289421	1.9842491430547082	1.866548581638628	1.9816389741296392
C5AR1	0.1807047062112569	0.21222580544395858	0.1163830803422125	0.0208793740170892	0.0422248424355333	0.09787090098554
VWF	0.014102704797914	0.028156580709240903	0.0393040095198729	1e-08	0.0028010514042031	0.0144275611248974
H2AC20	2.0670439766756346	1.0568973595171147	2.509068226891828	1.1883485903734443	0.5507391832596165	0.412616289944436
H2AZ1	430.4370766258313	478.8136695168592	476.0976063881149	316.14634893702373	303.45289058804025	308.10238680093505
H3-3B	175.77382955506508	185.9475855635937	188.4559004403793	126.56897181016372	124.616903085904	125.79400494609169
HDAC9	0.8100349185319151	0.9663254595470823	0.9287642067186932	0.5195464650817744	0.6603301823489308	0.687759744116397
SLC25A6	2.3515053062073856	2.073282218330413	2.391828512828929	1.6014587418207484	1.8238814222020423	1.3872125307711543
PLCB2	0.1618512890517932	0.1852157083680786	0.1650282153069318	0.14345007704751028	0.1215294225174392	0.09692461403830299
HMGB1	53.64783124404269	61.71050378703546	61.2716868251693	39.8497156752474	40.0535932123512	47.43459738120872
FCGR2A	0.0316459553788007	0.0063182442912985	0.012599549508458	1e-08	0.006285447255175	0.0064749922837532
TLR2	1.9306071049487503	2.7987476334506103	2.3442875697502803	1.637067739099299	1.3593697564725193	2.193632536525525
PPIF	43.40238606695846	41.15814781236446	46.82356880407938	34.7512140165688	37.4503081381531	27.465022404822303
MAPK12	26.5022155627648	28.55383491092374	26.18383437438121	21.50239227132135	23.244752454386372	17.611787944304393
VDAC2	85.73351228948842	82.02997423680823	87.40969701423589	71.60245378550874	69.75210639353578	57.01410794202104
VDAC1	176.68281256827518	179.14782918872524	185.85235127006945	145.3980420973357	139.06145742601024	137.1906799871411
HDAC11	8.549473388645165	7.093756392362177	7.906146239111411	7.037752677939242	6.420791871635479	5.032899819692626
ACTG1	2524.863258273455	2333.5870698742074	2403.045828109124	2010.1510994502476	2096.981779976071	1596.2915682901662
SLC25A5	343.26330319460214	327.64148994889666	330.23077341177486	274.0961914862126	267.05038738160846	247.7920977510693
ITGB2	1.065134860875409	0.9929264238066	1.1459340714732753	0.6307340809351086	1.0966605695833422	0.6249579698592378
H4C2	1e-08	0.4485457923552017	1e-08	1e-08	1e-08	1e-08
GP1BA	1e-08	1e-08	0.0197212462632388	1e-08	1e-08	1e-08
CLCN4	1e-08	0.018391970302011902	1e-08	1e-08	1e-08	1e-08
NCF2	1e-08	1e-08	0.0096948062389093	1e-08	1e-08	1e-08
H2AX	74.27804309685656	68.57421373620386	71.53479571188596	58.63067060925413	57.63828874914055	54.35105010622366
H3-5	1.028408012336934	1.8077580053653852	0.4673083346326002	0.373270184221132	0.8436817270254219	0.5489204111469068
H3C7	0.3024942490257026	0.0503284552151007	0.0501813743378365	0.0495145341822268	0.050067207569056	0.0515770449930545
H2AC14	0.3139331068039855	0.7312427140076397	0.1041579679113078	0.2055476986220173	0.1558814948683635	0.2141097182904951
SLC25A4	3.3395181381460426	3.818030998173072	3.750724535610728	3.0526741652111107	2.9466955672216977	2.8739681940795747
H3C2	0.0974769532998676	0.3892329170255929	0.4366073404227424	0.2872036297184352	0.0484015669454279	0.1495835048330856
PLCG1	23.181639742492905	22.947678311994363	21.270020944848433	19.49185874827286	19.55380531199385	17.233474007002233
PIK3CD	10.520842032286366	10.32195863377419	10.440609418908075	9.467208322440625	9.006321630214382	7.905349865106062
CLCN5	1.8434515764666468	2.0720494462548147	1.7368356746832188	1.3774540657227607	1.5418943019873108	1.8571229774926399
ITGA2B	0.9664338894971789	0.9075901209241128	1.3823458659013812	1.1108673976030956	0.8815511035010338	0.6884251887690368
CASP4	33.905058246160884	43.23503473305509	44.436397630857286	36.74830352212235	34.77738826258425	31.784041859008013
AGER	1.54746076931437	1.442768440064311	1.5402678659123528	1.419435719059781	1.1018305290695423	1.388952027380369
ACTB	4407.849949629919	4078.6853602884253	4191.890244775874	3757.026175948939	3880.6547691106707	3316.945535142073
CASP1	1.3216489721019615	1.533543461616297	1.3411324205147925	1.0451625507672253	0.8096669920523087	1.5979283567110762
MAPK11	25.945657311091672	25.83905671629477	22.92371057482418	23.023721340496966	23.904664242890266	18.07137296966324
H4C1	1e-08	0.2473856014055696	1e-08	1e-08	1e-08	0.0633807445437037
H2AJ	118.82266446289947	116.77238329772321	112.47278690334376	108.49271146412121	105.87403407459307	89.95750327177318
HDAC6	23.541269431974094	20.896966845850425	21.88196162941401	20.411565220724633	21.26986663527981	16.359958347638468
HDAC2	10.063747567439284	11.931407083490624	11.620276353621964	8.761853722007187	8.867035208368817	11.99417021505051
H2AC15	0.20084967946061438	0.6516316131680984	0.2998741307607814	0.1479446165283471	0.2493265785394524	0.4109525146220794
MAPK3	30.186267577415766	26.628496525245662	27.505156891234012	24.884646538597426	26.651225419674017	23.00576305345838
VDAC3	47.657302975468	57.374427555214815	54.38337285618781	45.492716561363494	45.01235121363443	50.42634735413969
H2BK1	0.130394559806891	0.2169481071750414	1e-08	0.1280637531728799	0.0431644002253292	0.0444660750725461
HDAC10	12.855317770957905	11.990443288959709	11.182839835550482	10.614972697910536	11.273018650811457	10.392119560073105
MAP2K1	14.121196843096401	13.305742186958467	14.703191681694168	12.67297735528665	12.38579066697985	13.273361972532285
H2AZ2	39.65215992772788	40.748211345910896	39.86667197365289	35.13160143877897	36.26104939387408	38.52802887945367
HDAC5	13.050356719780131	12.16808993923774	12.08135554991587	12.286893325392843	12.160239649130725	9.699836471238088
CYBB	0.034946725172754205	0.029071866801052	0.023189527289888903	0.0228813710346305	0.040489338623432104	0.0119172482070013
ITGAM	0.046513442479362004	0.0051592239315749	0.0051441465393008996	0.0050757881585432	0.0051324432017251	0.0264360499321113
AKT1	67.67043383133128	64.8892333532084	64.81635966735655	65.56075740873789	65.7100648560409	52.27819116318971
GSDMD	23.12460485421884	21.994498097288137	23.886634077156945	24.501423143112845	23.740531097715866	15.84599594539059
PLCB3	24.981225745444174	24.643460763202462	25.192335746547986	24.97760969425877	24.59925378153344	20.701462936183344
H2AB3	2.2334755221745475	1.4303156882281411	1.0066840296097976	1.572735454921764	1.7995387760945656	0.7760118461391551
MACROH2A1	15.995749589323	15.632035306037272	14.967952261949637	14.158867110743001	15.577634402243751	14.223247740253337
RELA	51.02322864385954	50.4078009518317	51.73014999785515	47.46061429473936	50.88415585584048	46.17641116147316
PADI4	1e-08	0.0082489323411611	0.032899272087446904	0.0162310484512409	0.0082061133839129	0.0084535784427899
ITGAL	0.0229078089451031	1e-08	0.022801328968810902	0.0269979955916336	0.0045498988151423	0.0046871062631657
ELANE	0.1328679596846743	0.0147375630149731	1e-08	1e-08	0.10262737763117709	1e-08
HDAC3	46.04049036641004	44.826236607670616	45.02155748923955	43.4680599184604	45.11447745866853	41.645230787739905
H2BU1	0.6007871791760483	0.2726124215817955	1.3047154827837508	0.6973295588996948	0.5423946503314404	0.78225170739466
H2AC21	0.2505569417214908	1e-08	1e-08	1e-08	0.1990599343389431	1e-08
HDAC1	88.19942615121153	91.37697713838847	92.53724488176043	88.17790377382121	94.07712505372992	83.76201223157923
ATG7	5.758542112310468	5.603855652849966	5.932186993078432	5.958822407111711	5.958681929156955	4.995839350979722
H3C4	0.21241245360866678	0.1855392035541772	0.8192723058098392	0.0782308467143498	0.5273602573158568	0.5704266208933342
H2AB2	0.1264231521985593	0.2944767672822644	0.0838903449674831	0.2897144340645354	0.167398964985541	0.0431117786743975
H2AB1	0.1272846386871355	0.5082572897872522	0.08446199972024279	0.4583678539628973	0.2106745892088048	0.043405555632996404
H2BC10	1e-08	1e-08	0.257153474552814	0.2029890137014112	1e-08	0.0528611205530475
PRKCA	5.288426492888212	5.1611103080297545	4.902404813286455	5.0953771978852815	4.8693354413060925	5.410245679034612
H4C3	0.4919577189010604	0.0613882863858265	0.428462128222812	0.3623729721632602	0.1832088662897309	0.4403787433481048
H3C13	0.21241245360866678	1e-08	1e-08	0.0521539011428999	1e-08	0.1629790416838097
H2BC14	1e-08	1e-08	0.10593844582432159	1e-08	0.0528487185451147	0.0544424358260019
H2AC7	0.0488340472806199	1e-08	1e-08	1e-08	1e-08	0.0499589419344488
H4C4	1e-08	0.061692942844317	0.5536137714045196	1e-08	0.1227453975886535	0.5057877079964055
H2BC6	0.26495063779910827	0.5818825021252282	0.10548764396975	0.7286009658388956	0.2104952916945845	0.1084215218577401
SRC	18.695711869711882	16.67799092013365	17.95370442273358	18.263160123851442	19.61320624820945	16.818518503451376
C5	0.192383975508538	0.2296261823751949	0.2497692188956299	0.2382351312206824	0.17028733486375489	0.2866661232158048
MAPK13	5.894715443684889	4.8132486643267685	5.325831392320745	6.030874981729663	5.617144073353466	4.879292464639171
H4C11	0.2560962466387268	0.1278264981041632	0.1274529353619088	0.6287962811059142	1e-08	1e-08
HDAC8	5.869863828752415	6.057580777011683	6.300821073687383	6.034975137888391	5.8165872163640895	7.045171394758596
HAT1	9.351860605590185	12.358598988817567	9.66128868011165	8.716613112117303	10.04335131512434	14.098212398437553
H4C15	0.4210147190872383	0.0373587657269117	0.1489983209414952	0.2848480277785957	0.1858241692720787	0.2201421105225714
RAC1	192.4323195868288	188.0851426165568	182.69490714426672	194.4098013032829	203.11326733492766	192.39594326859694
SELPLG	0.017815002140998702	0.026676245983111302	0.0531965636113546	0.1224758502161233	0.017691852345574802	1e-08
MAPK14	8.898040760197173	8.840458601784714	8.95131105655794	9.47213618660808	9.319096047273852	9.927933895166685
PIK3R2	25.85651846281309	21.71386627392937	22.98954558559088	27.34254230518675	27.697450458555195	22.11812463690845
NCF1	0.07384836882317619	1e-08	0.128633929851919	0.1269245649459899	0.1466757437234317	0.018887374927034
MTOR	17.43791000989527	16.22195775425965	16.96361593003945	19.06882769177519	18.02720080985493	18.310245752362093
H3-3A	108.28489539745624	123.02815419592875	124.57934028058891	130.30125367686827	132.2529721881025	129.03467946396432
AKT3	7.84361764666577	8.140711913229794	7.7698727509062175	7.876046160037467	7.560465447100352	10.754089294438671
MAPK1	24.737439319196145	24.363453272320648	24.854819038726852	26.640312239483784	26.39671756274589	29.39665383183318
H2BC7	0.1053080819370663	0.3679403134964445	0.6289114852530554	0.8791183484404674	0.3660303888452342	0.3232015569755043
H2AC16	0.3100252259309069	0.412651494419249	1e-08	0.5074725192535283	0.20525474526235418	0.3171666733182853
PIK3CB	4.117862198729201	3.9348745427944256	4.062191066436056	4.249712102743539	4.370041495902933	4.993684585764318
RAF1	24.188207225981447	25.216731915158054	25.35094627486336	29.171681955686772	27.26390558654606	28.071835873675738
AKT2	14.74755765213101	13.420879274663324	13.71401272263325	16.59828407897986	16.673018612154493	14.197314363494481
H4-16	0.3626994131036337	0.7241432702794103	0.1203378448684042	0.7718016466462642	0.8404484041446397	0.24736947880164
H4C14	1e-08	0.1883504034565132	0.2503999492211238	0.4941449584044457	0.0624575746442264	0.2573642048138275
PLCB1	0.1036859342844137	0.08625539418075119	0.09632371684442899	0.1154102165174413	0.0480522912083807	0.3323662599219371
CLCN3	5.9313824309337	6.323365924412428	5.384020033723989	6.284422384818772	5.973614168419122	8.78542626982651
AZU1	0.0549181114622187	0.027411533634244402	0.13665708818572908	0.2427139841060425	0.027269244398140702	0.16854943857708218
CAMP	0.042141057399519705	0.042068118183180604	0.5033420198048988	0.45526553352998417	0.3766476587174672	0.25867062204638497
H2AC17	1.176228464418218	1.0720889025286544	0.5599292375396384	0.8538459526742117	1.9299002826207798	1.2556413382908707
MAP2K2	43.77814888644871	38.948064723045825	40.82335838002566	52.937431501723964	55.43871140538867	41.31867796815921
H3C1	0.588315577238965	0.0489414508194089	0.2927904901128889	0.7703992208982697	0.4381865462047699	0.4012449751428177
TLR4	0.3230671035514016	0.4293629605285149	0.3215654238594944	0.41477362594798417	0.3536903119956086	0.6032784152379764
PRKCG	2.0484242667154944	1.7211721033961973	1.786992018293527	1.9108298088951843	2.466250698511177	2.4030738175931945
H3C11	1e-08	1e-08	0.0493816713205005	0.1949018023985662	0.049269323942457505	1e-08
H2BC18	0.2340729330556032	0.1168339006779123	1e-08	0.2758666447295496	0.06973646375689939	0.526822581714771
NFKB1	17.736141654869254	17.716582314937785	17.209442606993733	22.673880817937057	21.569518483868627	20.79305520914216
H4C5	0.7858487167245398	1e-08	0.601689184342021	1.5436032832925282	0.4202242070723198	1.1131626196073798
SLC25A31	1e-08	1e-08	1e-08	1e-08	1e-08	0.0134171007248914
H4C13	1e-08	1e-08	1e-08	1e-08	1e-08	0.0658373621616768
H2AC4	1e-08	1e-08	1e-08	1e-08	0.09386412992073499	1e-08
MAP3K7	8.901955876966003	9.67981053768756	8.28489056769084	10.629704469578995	9.989174323050761	16.06847530482123
HDAC7	13.10587285886532	11.820996503222506	12.472146889906332	17.409670826698374	17.382902027457703	14.804409769188725
CYBA	221.30218191164818	210.640678173561	214.9849500113924	292.2437594859667	300.2903194329364	272.071394195246
H3C12	1e-08	1e-08	0.0484171857478344	0.1910951267657817	1e-08	0.1492913495697397
CR1	1e-08	1e-08	1e-08	0.0024615351027493	1e-08	0.0102562464039725
HDAC4	0.4026361551584853	0.3842500003979431	0.4272209664228069	0.5791392958478999	0.5748495697564665	0.5297435998942747
H2BC12L	1e-08	1e-08	1e-08	0.1571317548352466	1e-08	0.0545590148962932
PIK3CA	0.9386441939114141	0.9448280515475597	0.9576382197662141	1.3699951519724383	1.5820752310069575	3.4622920705073765
PIK3R1	1.0647512721566739	1.315736078018312	1.2681612462317517	1.5660400579085167	1.5527221577081847	2.1124587807760267
H4C12	0.5148394728034353	0.4497048253845433	0.2562232036216151	1.2008871520526645	0.4473704730330639	0.9875602924251521
H2BC13	0.276112637639869	0.4410155654103725	0.10993169063366409	0.5965896428297577	0.6032486831491142	0.3954620654456374
H2AW	12.550347591119332	12.626124032531912	13.609973177077556	17.74561712770083	20.4655069567176	18.43484589381164
PIK3R3	0.0489059678068064	0.117984841639917	0.0283958793962099	0.2081376465886177	0.1092777519695744	0.15426691322419409
ITGB3	56.463605555810794	55.53308925325314	55.157994095143856	81.91132479556963	83.89136922692305	84.98879627560113
H4C9	0.31366951898131207	0.06262532973868949	0.5619807300151672	0.8009629175522943	0.6853026588419409	0.6417898157070258
H2AC18	0.1869070194792959	0.18658351421208058	0.232547795955828	0.688372663265105	1.392112332651802	0.3824248548265504
LOC102724334	1e-08	1e-08	1e-08	0.056359860106037	0.056988939951874804	1e-08
H2BC17	0.5333053421866422	0.6920969589751108	0.3715785065315607	0.8904132307330644	1.5358943833924983	1.0366211030295707
H2BC15	0.6892627133150235	0.9632975942462264	0.503109850981188	2.391862135717829	1.8709613007078607	1.1752331874247655
H2AC11	2.3743445812301434	1.4624854180152793	2.061609245899679	4.316501471062364	2.909787727542786	5.426573651155652
H2AC19	0.09327850817646509	0.1862341069008221	0.1392673919263554	0.824500289079328	0.2779010841473447	0.7634173968634883
PLCB4	0.6483358712562786	1.0309189727716481	0.8596614599459318	2.162665161884072	1.9476586816669104	4.0269983353223475
C3	218.70628401430224	219.98649033112076	228.2339200654437	429.7340848674146	428.5117155427994	374.8991409681197
H4C8	0.5480396948851972	0.5470911284018039	1.2728153489748568	3.1696559321004	3.930703467071856	1.8688793708730256
H2BC8	1.018624100515999	0.5592735709383584	1.2166671993443565	2.501040393028636	3.995751446257629	4.585187873431626
H3C8	0.502124183651536	0.5012550893600757	0.09995805025359379	1.4301312064406888	1.246632852697262	1.386964713099518
H3C10	1.5886134449930076	1.2789224347047194	1.2241774906366056	3.6237296316326018	2.595458807437856	3.2504144704264886
H2AC8	2.0714321909748468	1.442683874773293	1.006927425165796	3.5956930388153285	4.640464174630614	4.928250548988187
H2BC11	1.4528126190984438	1.81287254701894	1.3944146715376335	5.605456768462932	5.668024001463553	3.5033701119032266
H2BC21	3.516314187211548	3.44315360548921	4.023850472150965	9.447522617298217	9.57521647170723	10.562809800564995
H2BC4	0.6364931092634805	1.3015276257893604	0.5517881695532268	3.428054206886571	3.77216916567686	4.127480936472212
H3C6	0.4243135339271646	0.1104989074944877	0.2019892943050399	1.277364701625492	1.3099433324715763	1.3777563329033564
H2AC13	0.4528247193293851	0.5022677258840353	0.3505599249095734	1.3341913706920034	1.9486760268998655	2.05891356851062
H2AC6	12.284724301633418	11.880228295534526	11.702216822732868	42.88778267065175	40.7930933295401	45.8524810074092
H2BC12	29.790964962554984	26.544027725488142	25.544181408379497	101.56349981404948	102.94809262773136	102.54817066732927
H2BC5	2.9810960130851183	4.143708666043292	4.563538902304981	15.713809369261375	15.083501871580692	15.750688732606244
