# Supplementary material for: Peptide-based Self-adaptive Implant Coating Sequentially Regulates Bone Regeneration to Enhance Interfacial Osseointegration
Source: Research Square preprint supplement (doi:10.21203/rs.3.rs-5132912/v1), 2024-10-01
Supplement: Supplementary file 857 [file 317_Alcoholism(hsa05034).heatmap-data.xls]

id	S1	S2	S3	C1	C2	C3
H2BC9	9.757294341978419	10.49380764543431	12.555768390944927	4.235528139180963	3.5333136670162397	4.301658694745401
MACROH2A2	1.2633153222595164	0.8235942770396605	1.2702742358313845	0.4937613054941938	0.4608670087412487	0.3428858471898509
ATF4	88.59865210318637	90.22393941736252	94.15933392013181	44.35863505661207	46.15516893582139	44.00387387583949
H2AC20	2.0670439766756346	1.0568973595171147	2.509068226891828	1.1883485903734443	0.5507391832596165	0.412616289944436
H2AZ1	430.4370766258313	478.8136695168592	476.0976063881149	316.14634893702373	303.45289058804025	308.10238680093505
GNB3	1.1315087487492939	1.1781331012638963	0.7508328516899162	0.6691596567890199	0.7128766784649279	0.6347981632071398
H3-3B	175.77382955506508	185.9475855635937	188.4559004403793	126.56897181016372	124.616903085904	125.79400494609169
HDAC9	0.8100349185319151	0.9663254595470823	0.9287642067186932	0.5195464650817744	0.6603301823489308	0.687759744116397
CAMKK1	3.1797617556585496	3.1077815020324686	3.3914462456272805	2.398056377256869	2.226428490847132	2.390080730954884
GRIN3B	3.0102551799737536	3.0114659599240245	2.4136562423217987	1.9772817140558567	2.305961686466952	1.9543593643675023
CREB3L1	0.0641477473164615	1e-08	0.023943597233958003	1e-08	1e-08	0.0082031829834413
CREB3L4	3.8232387246170494	4.4780244538182625	3.762223606182364	3.0615221249183415	3.2359174455578303	2.955703763260939
SHC4	0.0574960292684482	0.019132177707779703	0.0524597125417091	0.0329398377456984	0.0047582238513108	0.024508527974768102
HDAC11	8.549473388645165	7.093756392362177	7.906146239111411	7.037752677939242	6.420791871635479	5.032899819692626
H4C2	1e-08	0.4485457923552017	1e-08	1e-08	1e-08	1e-08
GNG3	0.10355659633312339	1e-08	1e-08	1e-08	1e-08	1e-08
GNGT2	1e-08	0.020892658685932503	1e-08	1e-08	1e-08	1e-08
DDC	1e-08	0.0089982915549257	1e-08	1e-08	1e-08	1e-08
GRIN2B	0.0008089669952615	1e-08	1e-08	1e-08	1e-08	1e-08
H2AX	74.27804309685656	68.57421373620386	71.53479571188596	58.63067060925413	57.63828874914055	54.35105010622366
H3-5	1.028408012336934	1.8077580053653852	0.4673083346326002	0.373270184221132	0.8436817270254219	0.5489204111469068
H3C7	0.3024942490257026	0.0503284552151007	0.0501813743378365	0.0495145341822268	0.050067207569056	0.0515770449930545
H2AC14	0.3139331068039855	0.7312427140076397	0.1041579679113078	0.2055476986220173	0.1558814948683635	0.2141097182904951
GNAI1	0.8116092798065243	0.8173956820270513	0.9249491877264673	0.5589145358587307	0.6295375763484393	0.8573264942858229
MAOA	3.017415974454812	2.8536568338917787	3.138217552845387	2.6194223457422083	2.4306441386450803	2.33191654785552
GNAI3	18.588143899709664	20.33459505340041	20.406736763939126	15.107755123718277	15.32561125916332	18.21622861271502
ADCY5	0.41734394353771487	0.2930717420580717	0.23205329933481939	0.299639273177872	0.2343836964818354	0.1855056708175017
CREB3L2	7.777031027032177	7.368723816939418	7.448871487610469	5.742018360811608	6.170292391268156	6.691333734291398
H3C2	0.0974769532998676	0.3892329170255929	0.4366073404227424	0.2872036297184352	0.0484015669454279	0.1495835048330856
GNG7	1e-08	0.0282205002795229	0.016882820885056403	0.0111056512921771	0.0056148103630224	1e-08
GNG10	0.041474379713765504	0.1449090554236621	0.041281598647612404	1e-08	0.0823753492143669	1e-08
GNG2	0.0561458503451802	0.0467072276146153	0.0139712258460781	0.0045951959752057	0.0232323936174278	0.043079382079489005
SLC29A3	1.8551477949620991	1.564886630941489	1.5695459977435808	1.4575895784779183	1.3172614515915293	1.5372837926533205
CREB3L3	0.0769872094223066	0.0480337270329593	0.2011520477282521	0.0567082981283309	0.1051256481724306	0.039380311833955
H4C1	1e-08	0.2473856014055696	1e-08	1e-08	1e-08	0.0633807445437037
CALM3	313.2010095734073	307.3988139986096	309.528967597347	271.34764464782694	276.5775590497652	265.0769999533574
H2AJ	118.82266446289947	116.77238329772321	112.47278690334376	108.49271146412121	105.87403407459307	89.95750327177318
HDAC6	23.541269431974094	20.896966845850425	21.88196162941401	20.411565220724633	21.26986663527981	16.359958347638468
GNG5	111.39431668777151	107.49993549122236	110.53821437043571	98.35660919120475	92.36590417046176	99.07116535504592
HDAC2	10.063747567439284	11.931407083490624	11.620276353621964	8.761853722007187	8.867035208368817	11.99417021505051
H2AC15	0.20084967946061438	0.6516316131680984	0.2998741307607814	0.1479446165283471	0.2493265785394524	0.4109525146220794
MAPK3	30.186267577415766	26.628496525245662	27.505156891234012	24.884646538597426	26.651225419674017	23.00576305345838
GRIN2D	2.127811263774151	2.059236467570844	2.1869365245860224	1.9025053520690736	2.237908781800785	1.5029406298271906
HRAS	100.45161469623527	97.23902980514923	102.75876935336592	97.0059477919542	98.61871008138664	71.07847567054743
CALM2	105.74646153345559	119.92259853591777	115.96219752708413	92.83782570110435	99.0652361830926	112.05536323941703
CALM1	80.49321486246487	89.29413605905106	86.1509976180294	73.45463255477034	70.44815910900925	83.85267580635822
CAMKK2	9.174983846849768	8.557597364862227	7.915826091359067	8.04147138895924	7.566796124142019	7.2572463682196995
GNAI2	235.3102066883315	222.78086971718253	221.4414328600765	206.2647494095028	214.8521670112772	186.0703240062316
H2BK1	0.130394559806891	0.2169481071750414	1e-08	0.1280637531728799	0.0431644002253292	0.0444660750725461
GNB2	251.29866457143072	233.068670655262	250.6519944584048	237.01674329703567	235.27749588642448	186.1318486058725
HDAC10	12.855317770957905	11.990443288959709	11.182839835550482	10.614972697910536	11.273018650811457	10.392119560073105
CALML4	1.1176515040082344	1.019164598541392	1.208726706900415	0.8232550890893484	1.1739596716623537	1.0224604810467788
MAP2K1	14.121196843096401	13.305742186958467	14.703191681694168	12.67297735528665	12.38579066697985	13.273361972532285
H2AZ2	39.65215992772788	40.748211345910896	39.86667197365289	35.13160143877897	36.26104939387408	38.52802887945367
HDAC5	13.050356719780131	12.16808993923774	12.08135554991587	12.286893325392843	12.160239649130725	9.699836471238088
SHC2	1.2386874337173108	0.9042224148935004	0.8784624638543999	0.9276162187082525	0.9687232445316518	0.8712142100381043
GNB1	210.64194633837425	206.58714972581706	206.2625934327632	198.90226003885502	195.5943675171693	180.93587283913746
GRIN2C	0.0146605698146433	0.0058540839195336996	0.0145924246355611	0.0086391111111443	0.017471068817363003	0.0029996633184093
GNGT1	0.3767830510456306	0.9027141498944539	0.5625475285224947	0.3700480424662641	0.7483569116373278	0.5011009460444721
H2AB3	2.2334755221745475	1.4303156882281411	1.0066840296097976	1.572735454921764	1.7995387760945656	0.7760118461391551
MACROH2A1	15.995749589323	15.632035306037272	14.967952261949637	14.158867110743001	15.577634402243751	14.223247740253337
GNG8	1e-08	0.039758408618752204	0.0066070446436277	0.019557719178587403	1e-08	0.0135815959736508
ATF6B	39.491970661415	36.810523821187324	37.656393916227444	37.19325155587133	36.214446726904846	35.04582929221133
HDAC3	46.04049036641004	44.826236607670616	45.02155748923955	43.4680599184604	45.11447745866853	41.645230787739905
H2BU1	0.6007871791760483	0.2726124215817955	1.3047154827837508	0.6973295588996948	0.5423946503314404	0.78225170739466
H2AC21	0.2505569417214908	1e-08	1e-08	1e-08	0.1990599343389431	1e-08
GRB2	44.03523148232001	41.60420222658865	42.914097017962696	44.33920500686435	43.42100273303917	37.794321249319324
HDAC1	88.19942615121153	91.37697713838847	92.53724488176043	88.17790377382121	94.07712505372992	83.76201223157923
H3C4	0.21241245360866678	0.1855392035541772	0.8192723058098392	0.0782308467143498	0.5273602573158568	0.5704266208933342
SLC29A1	38.75752782156061	36.50579623095828	36.03606690776552	35.821969049061536	37.7651722778603	37.24111520281691
PPP1CC	29.4275898448069	34.58106551685553	31.486517079500516	30.201491484536728	29.2679799217944	35.649614123684714
GRIN1	0.0452249219540878	0.0677199626137454	0.0180058890505838	0.071066434393739	0.0538947525439194	0.0046266770213489
H2AB2	0.1264231521985593	0.2944767672822644	0.0838903449674831	0.2897144340645354	0.167398964985541	0.0431117786743975
H2AB1	0.1272846386871355	0.5082572897872522	0.08446199972024279	0.4583678539628973	0.2106745892088048	0.043405555632996404
H2BC10	1e-08	1e-08	0.257153474552814	0.2029890137014112	1e-08	0.0528611205530475
GNG11	39.04506930747562	40.13042521218409	43.60143891332979	41.28819196923095	41.41315130298432	40.05418894344024
H4C3	0.4919577189010604	0.0613882863858265	0.428462128222812	0.3623729721632602	0.1832088662897309	0.4403787433481048
PPP1CA	222.6408916554499	202.7111394215264	222.66306563349372	226.9715821088327	220.40441223676484	201.74715510922144
H3C13	0.21241245360866678	1e-08	1e-08	0.0521539011428999	1e-08	0.1629790416838097
H2BC14	1e-08	1e-08	0.10593844582432159	1e-08	0.0528487185451147	0.0544424358260019
H2AC7	0.0488340472806199	1e-08	1e-08	1e-08	1e-08	0.0499589419344488
H4C4	1e-08	0.061692942844317	0.5536137714045196	1e-08	0.1227453975886535	0.5057877079964055
BDNF	1.1930003705998267	1.4356078702037582	1.1374879008440737	1.0614683560094074	1.1495628123301591	1.5709163900113636
GNG4	2.9011178417351524	2.5328572655004997	2.628235344415125	2.7188703939307595	2.671087471542978	2.7415765413287394
CREB3	44.08381730059603	44.62242410682983	47.12674151223446	47.62866954058586	46.32514310406186	44.366937858604324
SHC1	223.7971103641272	211.02093173346086	226.8964903905956	236.1292775941485	232.72289783248192	206.48315588122207
H2BC6	0.26495063779910827	0.5818825021252282	0.10548764396975	0.7286009658388956	0.2104952916945845	0.1084215218577401
H4C11	0.2560962466387268	0.1278264981041632	0.1274529353619088	0.6287962811059142	1e-08	1e-08
HDAC8	5.869863828752415	6.057580777011683	6.300821073687383	6.034975137888391	5.8165872163640895	7.045171394758596
HAT1	9.351860605590185	12.358598988817567	9.66128868011165	8.716613112117303	10.04335131512434	14.098212398437553
H4C15	0.4210147190872383	0.0373587657269117	0.1489983209414952	0.2848480277785957	0.1858241692720787	0.2201421105225714
GNAS	237.20036142999922	241.5142957472041	238.38227385026582	267.7413351837627	268.2104567542184	215.1116677080019
NRAS	32.30903255313639	33.42553335750039	32.84649855598537	30.521503560304282	32.5888152931595	40.54503389644024
GNB5	4.992151277664575	4.828241253503262	4.924410757563821	5.375839640107412	5.196742964181127	4.985079951858425
PRKACA	11.868676778266261	11.826407645278815	11.67631037129775	12.646900834114655	13.004199851654588	12.127228771507024
ADORA2A	0.035732232400453603	0.0089176039513126	0.10669840590914459	0.1052805334405454	0.0887130501689873	0.0091388390123991
ADORA2B	8.492122079978248	8.233129809957763	8.918442113481134	9.672753212235827	9.294667551125293	8.53401214959721
CALML6	0.0554685155971407	0.1661175062333613	0.0441685516176236	0.0871632169345926	0.1432211871886315	0.0907939709320941
PPP1CB	20.46577135566999	24.93974971189001	23.389051959959556	21.26267302950936	23.03227644946297	30.983881385173042
GNG12	38.64534635033546	39.70453151483419	36.92708653850902	37.65194890468091	38.61158341016804	50.45055968101496
H3-3A	108.28489539745624	123.02815419592875	124.57934028058891	130.30125367686827	132.2529721881025	129.03467946396432
SLC29A2	3.020424736666917	2.6069497204171026	2.9424195632120522	3.2188970648245965	3.4404844083754194	2.8569055757940287
MAPK1	24.737439319196145	24.363453272320648	24.854819038726852	26.640312239483784	26.39671756274589	29.39665383183318
H2BC7	0.1053080819370663	0.3679403134964445	0.6289114852530554	0.8791183484404674	0.3660303888452342	0.3232015569755043
H2AC16	0.3100252259309069	0.412651494419249	1e-08	0.5074725192535283	0.20525474526235418	0.3171666733182853
RAF1	24.188207225981447	25.216731915158054	25.35094627486336	29.171681955686772	27.26390558654606	28.071835873675738
H4-16	0.3626994131036337	0.7241432702794103	0.1203378448684042	0.7718016466462642	0.8404484041446397	0.24736947880164
CREB1	1.9832153683608467	2.0791616069895094	1.925424231102378	1.844242372102932	2.085815392447396	3.280985027307997
H4C14	1e-08	0.1883504034565132	0.2503999492211238	0.4941449584044457	0.0624575746442264	0.2573642048138275
GNAO1	0.018346499144100303	0.0152622886594596	0.0152176858642671	0.0210216459265979	0.0030366208777302998	0.0656918652508222
KRAS	11.269330966763619	11.66190713369311	10.856289971568216	11.76610994720155	11.277972809890512	17.023575070713086
PKIA	2.6639203839248293	3.1636613905475754	3.240133663365456	3.625609159444652	2.970492150880181	4.02331786875973
TH	1e-08	0.005939391733459	0.0059220343628502	1e-08	0.0059085612659134	0.0304336641884483
H2AC17	1.176228464418218	1.0720889025286544	0.5599292375396384	0.8538459526742117	1.9299002826207798	1.2556413382908707
H3C1	0.588315577238965	0.0489414508194089	0.2927904901128889	0.7703992208982697	0.4381865462047699	0.4012449751428177
H3C11	1e-08	1e-08	0.0493816713205005	0.1949018023985662	0.049269323942457505	1e-08
H2BC18	0.2340729330556032	0.1168339006779123	1e-08	0.2758666447295496	0.06973646375689939	0.526822581714771
PRKACB	2.974838042444816	3.1606779184505536	2.8900656437939203	3.2532511739306695	3.23740729658379	5.749002091530388
GNB4	6.493464079052721	6.033110068896692	5.653505185986793	6.911297371685934	6.374112740044049	9.941549205060463
H4C5	0.7858487167245398	1e-08	0.601689184342021	1.5436032832925282	0.4202242070723198	1.1131626196073798
H4C13	1e-08	1e-08	1e-08	1e-08	1e-08	0.0658373621616768
H2AC4	1e-08	1e-08	1e-08	1e-08	0.09386412992073499	1e-08
ARAF	27.15444854886904	24.41651436174513	26.699018230617284	34.497617264546236	35.22755947885714	30.9606050394961
CAMK4	0.8855878108953944	1.1384002925364376	0.9019231967383092	1.198691860337094	1.073315816050144	2.011670326743376
HDAC7	13.10587285886532	11.820996503222506	12.472146889906332	17.409670826698374	17.382902027457703	14.804409769188725
H3C12	1e-08	1e-08	0.0484171857478344	0.1910951267657817	1e-08	0.1492913495697397
ATF2	7.91668852058225	8.27501631285516	7.265184565481813	9.971259869354482	9.543270222997048	15.446473031100787
BRAF	2.199477266802425	2.078607937787018	1.743322296011609	2.4318428287912015	2.654570924839076	4.114238383268856
HDAC4	0.4026361551584853	0.3842500003979431	0.4272209664228069	0.5791392958478999	0.5748495697564665	0.5297435998942747
CREB5	0.599767836926338	0.7222177438498092	0.5764588104751205	0.8890927627790255	0.740804634356355	1.3441313883778456
H2BC12L	1e-08	1e-08	1e-08	0.1571317548352466	1e-08	0.0545590148962932
H4C12	0.5148394728034353	0.4497048253845433	0.2562232036216151	1.2008871520526645	0.4473704730330639	0.9875602924251521
H2BC13	0.276112637639869	0.4410155654103725	0.10993169063366409	0.5965896428297577	0.6032486831491142	0.3954620654456374
H2AW	12.550347591119332	12.626124032531912	13.609973177077556	17.74561712770083	20.4655069567176	18.43484589381164
H4C9	0.31366951898131207	0.06262532973868949	0.5619807300151672	0.8009629175522943	0.6853026588419409	0.6417898157070258
SOS1	2.080211476712667	2.6011998682049398	2.1545563909334815	3.551231269245069	3.2204259374674096	5.888567067593386
SOS2	3.554032723200676	3.6201027792230063	2.466357581282573	4.569629643161701	5.002320252812752	7.664995400313128
H2AC18	0.1869070194792959	0.18658351421208058	0.232547795955828	0.688372663265105	1.392112332651802	0.3824248548265504
LOC102724334	1e-08	1e-08	1e-08	0.056359860106037	0.056988939951874804	1e-08
GNG13	0.1264231521985593	0.0757226047297251	0.30200521588293927	0.5214859733161639	0.4519771884609607	0.9829483357762628
H2BC17	0.5333053421866422	0.6920969589751108	0.3715785065315607	0.8904132307330644	1.5358943833924983	1.0366211030295707
H2BC15	0.6892627133150235	0.9632975942462264	0.503109850981188	2.391862135717829	1.8709613007078607	1.1752331874247655
H2AC11	2.3743445812301434	1.4624854180152793	2.061609245899679	4.316501471062364	2.909787727542786	5.426573651155652
H2AC19	0.09327850817646509	0.1862341069008221	0.1392673919263554	0.824500289079328	0.2779010841473447	0.7634173968634883
H4C8	0.5480396948851972	0.5470911284018039	1.2728153489748568	3.1696559321004	3.930703467071856	1.8688793708730256
FOSB	0.7059267422922998	0.7310490073310815	0.7814468136990889	1.4125346161542711	1.4807158259999182	1.4038790827434002
H2BC8	1.018624100515999	0.5592735709383584	1.2166671993443565	2.501040393028636	3.995751446257629	4.585187873431626
H3C8	0.502124183651536	0.5012550893600757	0.09995805025359379	1.4301312064406888	1.246632852697262	1.386964713099518
H3C10	1.5886134449930076	1.2789224347047194	1.2241774906366056	3.6237296316326018	2.595458807437856	3.2504144704264886
H2AC8	2.0714321909748468	1.442683874773293	1.006927425165796	3.5956930388153285	4.640464174630614	4.928250548988187
H2BC11	1.4528126190984438	1.81287254701894	1.3944146715376335	5.605456768462932	5.668024001463553	3.5033701119032266
H2BC21	3.516314187211548	3.44315360548921	4.023850472150965	9.447522617298217	9.57521647170723	10.562809800564995
H2BC4	0.6364931092634805	1.3015276257893604	0.5517881695532268	3.428054206886571	3.77216916567686	4.127480936472212
H3C6	0.4243135339271646	0.1104989074944877	0.2019892943050399	1.277364701625492	1.3099433324715763	1.3777563329033564
H2AC13	0.4528247193293851	0.5022677258840353	0.3505599249095734	1.3341913706920034	1.9486760268998655	2.05891356851062
H2AC6	12.284724301633418	11.880228295534526	11.702216822732868	42.88778267065175	40.7930933295401	45.8524810074092
H2BC12	29.790964962554984	26.544027725488142	25.544181408379497	101.56349981404948	102.94809262773136	102.54817066732927
H2BC5	2.9810960130851183	4.143708666043292	4.563538902304981	15.713809369261375	15.083501871580692	15.750688732606244
