# Supplementary material for: Peptide-based Self-adaptive Implant Coating Sequentially Regulates Bone Regeneration to Enhance Interfacial Osseointegration
Source: Research Square preprint supplement (doi:10.21203/rs.3.rs-5132912/v1), 2024-10-01
Supplement: Supplementary file 861 [file 318_Systemic lupus erythematosus(hsa05322).heatmap-data.xls]

id	S1	S2	S3	C1	C2	C3
H2BC9	9.757294341978419	10.49380764543431	12.555768390944927	4.235528139180963	3.5333136670162397	4.301658694745401
MACROH2A2	1.2633153222595164	0.8235942770396605	1.2702742358313845	0.4937613054941938	0.4608670087412487	0.3428858471898509
H2AC20	2.0670439766756346	1.0568973595171147	2.509068226891828	1.1883485903734443	0.5507391832596165	0.412616289944436
H2AZ1	430.4370766258313	478.8136695168592	476.0976063881149	316.14634893702373	303.45289058804025	308.10238680093505
H3-3B	175.77382955506508	185.9475855635937	188.4559004403793	126.56897181016372	124.616903085904	125.79400494609169
C4A	0.0642482182520041	0.11453037639146739	0.0593817534637159	0.027042768370392503	0.0546892208327555	0.051643571480054905
FCGR2A	0.0316459553788007	0.0063182442912985	0.012599549508458	1e-08	0.006285447255175	0.0064749922837532
C8G	0.08480826997655899	0.1693229516771379	0.140690100708804	0.08329231969132819	0.112296017260448	0.0867618327692471
H4C2	1e-08	0.4485457923552017	1e-08	1e-08	1e-08	1e-08
GRIN2B	0.0008089669952615	1e-08	1e-08	1e-08	1e-08	1e-08
H2AX	74.27804309685656	68.57421373620386	71.53479571188596	58.63067060925413	57.63828874914055	54.35105010622366
H3-5	1.028408012336934	1.8077580053653852	0.4673083346326002	0.373270184221132	0.8436817270254219	0.5489204111469068
H3C7	0.3024942490257026	0.0503284552151007	0.0501813743378365	0.0495145341822268	0.050067207569056	0.0515770449930545
SNRPD1	14.605880583974475	16.11593894521654	15.65551140141836	12.063931498403473	11.20070612734255	14.103165853059659
H2AC14	0.3139331068039855	0.7312427140076397	0.1041579679113078	0.2055476986220173	0.1558814948683635	0.2141097182904951
HLA-DMA	1.4127468158675236	0.6141635985443854	0.9072129645431388	0.7832627026904869	0.6788617373315741	0.6760225198906668
H3C2	0.0974769532998676	0.3892329170255929	0.4366073404227424	0.2872036297184352	0.0484015669454279	0.1495835048330856
C4B	0.02294579866143	0.022906083278293403	0.1644417611302903	0.0360570211605234	0.0227871811803148	0.0328640945782167
C2	0.053878558432917605	0.1411864055277054	0.013407037573224	0.0264577438518334	0.0200647982091241	0.055119653670241
ACTN4	144.1333476397766	142.24476658192253	139.95369766136784	129.33162903224692	134.14704241833945	107.35690624080556
H4C1	1e-08	0.2473856014055696	1e-08	1e-08	1e-08	0.0633807445437037
H2AJ	118.82266446289947	116.77238329772321	112.47278690334376	108.49271146412121	105.87403407459307	89.95750327177318
CD80	1e-08	0.0272512908946946	0.009057223731418	0.0089368660270442	1e-08	0.0093091277517606
H2AC15	0.20084967946061438	0.6516316131680984	0.2998741307607814	0.1479446165283471	0.2493265785394524	0.4109525146220794
H2BK1	0.130394559806891	0.2169481071750414	1e-08	0.1280637531728799	0.0431644002253292	0.0444660750725461
ACTN1	135.34646003379467	129.0787434430689	135.86440639350025	128.91881255637043	125.39015510835567	106.302593171664
CD40	61.430166781689884	62.3018783914509	63.32283052217959	60.07131200978458	59.950720077998724	50.65835699153115
H2AZ2	39.65215992772788	40.748211345910896	39.86667197365289	35.13160143877897	36.26104939387408	38.52802887945367
SNRPB	290.8770996853689	282.53812367751374	289.8687089485769	282.7840373480452	291.2208058627803	222.22351640496393
H2AB3	2.2334755221745475	1.4303156882281411	1.0066840296097976	1.572735454921764	1.7995387760945656	0.7760118461391551
MACROH2A1	15.995749589323	15.632035306037272	14.967952261949637	14.158867110743001	15.577634402243751	14.223247740253337
ELANE	0.1328679596846743	0.0147375630149731	1e-08	1e-08	0.10262737763117709	1e-08
H2BU1	0.6007871791760483	0.2726124215817955	1.3047154827837508	0.6973295588996948	0.5423946503314404	0.78225170739466
H2AC21	0.2505569417214908	1e-08	1e-08	1e-08	0.1990599343389431	1e-08
H3C4	0.21241245360866678	0.1855392035541772	0.8192723058098392	0.0782308467143498	0.5273602573158568	0.5704266208933342
H2AB2	0.1264231521985593	0.2944767672822644	0.0838903449674831	0.2897144340645354	0.167398964985541	0.0431117786743975
H2AB1	0.1272846386871355	0.5082572897872522	0.08446199972024279	0.4583678539628973	0.2106745892088048	0.043405555632996404
C6	0.022030402758174403	1e-08	1e-08	1e-08	0.0218781131394194	1e-08
H2BC10	1e-08	1e-08	0.257153474552814	0.2029890137014112	1e-08	0.0528611205530475
SNRPD3	24.740089762498275	27.6884860094122	26.79936776934609	27.275988517318968	27.37349635108485	24.53075808596091
HLA-DOB	0.1314762642170537	1e-08	1e-08	0.0553397723213123	0.018652495368864	0.0576449314628256
H4C3	0.4919577189010604	0.0613882863858265	0.428462128222812	0.3623729721632602	0.1832088662897309	0.4403787433481048
H3C13	0.21241245360866678	1e-08	1e-08	0.0521539011428999	1e-08	0.1629790416838097
H2BC14	1e-08	1e-08	0.10593844582432159	1e-08	0.0528487185451147	0.0544424358260019
H2AC7	0.0488340472806199	1e-08	1e-08	1e-08	1e-08	0.0499589419344488
H4C4	1e-08	0.061692942844317	0.5536137714045196	1e-08	0.1227453975886535	0.5057877079964055
H2BC6	0.26495063779910827	0.5818825021252282	0.10548764396975	0.7286009658388956	0.2104952916945845	0.1084215218577401
C5	0.192383975508538	0.2296261823751949	0.2497692188956299	0.2382351312206824	0.17028733486375489	0.2866661232158048
H4C11	0.2560962466387268	0.1278264981041632	0.1274529353619088	0.6287962811059142	1e-08	1e-08
C1R	8.085411694212116	8.643182266108699	8.332876178262032	9.337805393762357	8.702596238434788	8.076342946754504
H4C15	0.4210147190872383	0.0373587657269117	0.1489983209414952	0.2848480277785957	0.1858241692720787	0.2201421105225714
TRIM21	15.72834559864495	15.354207278129405	15.885838014540141	18.68327575688251	15.734658295534336	15.247930770644349
H3-3A	108.28489539745624	123.02815419592875	124.57934028058891	130.30125367686827	132.2529721881025	129.03467946396432
H2BC7	0.1053080819370663	0.3679403134964445	0.6289114852530554	0.8791183484404674	0.3660303888452342	0.3232015569755043
H2AC16	0.3100252259309069	0.412651494419249	1e-08	0.5074725192535283	0.20525474526235418	0.3171666733182853
H4-16	0.3626994131036337	0.7241432702794103	0.1203378448684042	0.7718016466462642	0.8404484041446397	0.24736947880164
H4C14	1e-08	0.1883504034565132	0.2503999492211238	0.4941449584044457	0.0624575746442264	0.2573642048138275
TNF	37.26898480257136	34.67084001646473	37.89350928658885	43.03124937868369	45.516154962361774	41.80204959517536
H2AC17	1.176228464418218	1.0720889025286544	0.5599292375396384	0.8538459526742117	1.9299002826207798	1.2556413382908707
H3C1	0.588315577238965	0.0489414508194089	0.2927904901128889	0.7703992208982697	0.4381865462047699	0.4012449751428177
C1S	4.996392949405059	4.894277903125638	4.9901130844781125	6.34493260877964	6.07763761620736	5.729739715592055
H3C11	1e-08	1e-08	0.0493816713205005	0.1949018023985662	0.049269323942457505	1e-08
HLA-DMB	0.018475795618038703	1e-08	1e-08	1e-08	0.018348077951864702	0.0756055153013914
H2BC18	0.2340729330556032	0.1168339006779123	1e-08	0.2758666447295496	0.06973646375689939	0.526822581714771
C7	0.0043571406880889	1e-08	1e-08	0.004279256841501	0.0216350656325347	1e-08
SSB	36.33645141734002	42.19250798762043	38.16135353540526	42.218393120583684	41.80108983756372	66.91496665536974
H4C5	0.7858487167245398	1e-08	0.601689184342021	1.5436032832925282	0.4202242070723198	1.1131626196073798
H4C13	1e-08	1e-08	1e-08	1e-08	1e-08	0.0658373621616768
H2AC4	1e-08	1e-08	1e-08	1e-08	0.09386412992073499	1e-08
HLA-DPA1	0.056926544887122704	1e-08	0.056661939103751405	0.06988622413148589	0.0565330285122598	0.087356770982522
H3C12	1e-08	1e-08	0.0484171857478344	0.1910951267657817	1e-08	0.1492913495697397
RO60	1.7623523553030631	2.2743440492927594	2.1507534208836026	2.7969536624266613	2.67344767295414	4.93589739860924
H2BC12L	1e-08	1e-08	1e-08	0.1571317548352466	1e-08	0.0545590148962932
H4C12	0.5148394728034353	0.4497048253845433	0.2562232036216151	1.2008871520526645	0.4473704730330639	0.9875602924251521
H2BC13	0.276112637639869	0.4410155654103725	0.10993169063366409	0.5965896428297577	0.6032486831491142	0.3954620654456374
H2AW	12.550347591119332	12.626124032531912	13.609973177077556	17.74561712770083	20.4655069567176	18.43484589381164
H4C9	0.31366951898131207	0.06262532973868949	0.5619807300151672	0.8009629175522943	0.6853026588419409	0.6417898157070258
H2AC18	0.1869070194792959	0.18658351421208058	0.232547795955828	0.688372663265105	1.392112332651802	0.3824248548265504
LOC102724334	1e-08	1e-08	1e-08	0.056359860106037	0.056988939951874804	1e-08
H2BC17	0.5333053421866422	0.6920969589751108	0.3715785065315607	0.8904132307330644	1.5358943833924983	1.0366211030295707
H2BC15	0.6892627133150235	0.9632975942462264	0.503109850981188	2.391862135717829	1.8709613007078607	1.1752331874247655
H2AC11	2.3743445812301434	1.4624854180152793	2.061609245899679	4.316501471062364	2.909787727542786	5.426573651155652
H2AC19	0.09327850817646509	0.1862341069008221	0.1392673919263554	0.824500289079328	0.2779010841473447	0.7634173968634883
C3	218.70628401430224	219.98649033112076	228.2339200654437	429.7340848674146	428.5117155427994	374.8991409681197
H4C8	0.5480396948851972	0.5470911284018039	1.2728153489748568	3.1696559321004	3.930703467071856	1.8688793708730256
H2BC8	1.018624100515999	0.5592735709383584	1.2166671993443565	2.501040393028636	3.995751446257629	4.585187873431626
H3C8	0.502124183651536	0.5012550893600757	0.09995805025359379	1.4301312064406888	1.246632852697262	1.386964713099518
H3C10	1.5886134449930076	1.2789224347047194	1.2241774906366056	3.6237296316326018	2.595458807437856	3.2504144704264886
H2AC8	2.0714321909748468	1.442683874773293	1.006927425165796	3.5956930388153285	4.640464174630614	4.928250548988187
H2BC11	1.4528126190984438	1.81287254701894	1.3944146715376335	5.605456768462932	5.668024001463553	3.5033701119032266
H2BC21	3.516314187211548	3.44315360548921	4.023850472150965	9.447522617298217	9.57521647170723	10.562809800564995
H2BC4	0.6364931092634805	1.3015276257893604	0.5517881695532268	3.428054206886571	3.77216916567686	4.127480936472212
H3C6	0.4243135339271646	0.1104989074944877	0.2019892943050399	1.277364701625492	1.3099433324715763	1.3777563329033564
H2AC13	0.4528247193293851	0.5022677258840353	0.3505599249095734	1.3341913706920034	1.9486760268998655	2.05891356851062
H2AC6	12.284724301633418	11.880228295534526	11.702216822732868	42.88778267065175	40.7930933295401	45.8524810074092
H2BC12	29.790964962554984	26.544027725488142	25.544181408379497	101.56349981404948	102.94809262773136	102.54817066732927
H2BC5	2.9810960130851183	4.143708666043292	4.563538902304981	15.713809369261375	15.083501871580692	15.750688732606244
