# Supplementary material for: Peptide-based Self-adaptive Implant Coating Sequentially Regulates Bone Regeneration to Enhance Interfacial Osseointegration
Source: Research Square preprint supplement (doi:10.21203/rs.3.rs-5132912/v1), 2024-10-01
Supplement: Supplementary file 865 [file 3_Glycine, serine and threonine metabolism(hsa00260).heatmap-data.xls]

id	S1	S2	S3	C1	C2	C3
PHGDH	45.76461523776405	41.610531537069136	44.54668962896144	12.314874224157125	12.643208433981197	9.974991831151183
PSAT1	76.02569701558674	83.35503868659886	81.86409437326512	23.48442908328672	24.94621950593289	25.871751524920402
SDSL	6.814724479033201	5.189863601772133	6.631536905282147	2.483967000286946	2.337269551806229	1.97651346664498
SHMT2	73.31020444711282	65.10657003373812	68.771430644406	46.96353590635853	44.112925693503314	37.956648726626966
DMGDH	0.0114850729527858	1e-08	0.017147527165938103	1e-08	1e-08	1e-08
AMT	1.0600678698472086	0.9461848608541517	0.8192855397300067	0.6491683986525105	0.7554957193369728	0.4848293043863891
SARDH	0.017062370593594	0.1135521997065985	0.0226440784931639	0.0111715902448139	1e-08	0.0058184743266884
CTH	1.8736429030655304	1.8130896315042735	1.849349435379147	1.0507828817380789	1.3527586125500148	1.6444989681440125
SRR	6.702408696304678	7.769453740081173	7.166407548868478	5.736793618473778	4.648098409747524	5.680253314866525
GAMT	25.51363102072282	23.602834390013214	24.228997114038002	19.10570879868234	20.907436724040465	16.34070575235854
PSPH	16.42062682805814	15.22239130867482	16.691266238504213	12.434043676723126	13.581897771990956	11.32823989768535
AOC3	0.07862782061757269	0.0932089260988427	0.0733709472027168	0.0096528020071113	0.06344348726686619	0.07541157852772959
PGAM4	1.7979016665681504	1.4858505695042807	1.3348243013864527	1.490768068840276	1.0829920066475813	0.9648873107931428
GCSH	13.46159349357668	12.973447054359905	11.769790240970472	8.55066739906197	10.551895922823006	11.07220137249199
SDS	1e-08	1e-08	0.0154452398958824	1e-08	1e-08	1e-08
MAOA	3.017415974454812	2.8536568338917787	3.138217552845387	2.6194223457422083	2.4306441386450803	2.33191654785552
GATM	0.050415716504283704	0.06710460362013419	0.016727131445945502	1e-08	0.016689075856352	0.0601732174918969
ALDH7A1	22.9139756476708	24.26743626509844	23.58262950096456	22.30932221680025	19.610076184911122	20.827055695453502
ALAS1	31.538698654705392	31.94844799143001	30.768083162942986	29.107906127249212	28.077147754669852	27.08248752126165
PGAM1	288.77457830060644	265.6219054325179	274.17576032887786	259.21648024035267	258.9292777222058	228.4457691031679
GRHPR	48.18645549189871	42.989792045094454	45.92740282098018	43.71486644670863	46.21202336623872	33.911339897987766
BPGM	7.001827013286968	7.7165579798042865	7.852850967335598	6.426061189250765	6.735511827139487	7.622288475785737
AOC2	0.5023867812769047	0.5758160802458366	0.7130365197805855	0.5116809203388583	0.5451096627260767	0.5996191669121562
LOC102724560	6.670736998163888	3.1674089289709277	7.6353725235331495	8.898022208321958	2.9674773023981365	2.1183660801291637
SHMT1	27.032441300508214	25.34232513626551	25.75613961792044	27.076042161535764	24.38419396308089	21.041744888325024
GCAT	8.826151829980905	7.504228415062008	8.77317357964426	8.491478294057112	8.96787035259088	6.228486524122682
PIPOX	0.06310480479674699	0.0104992717974069	0.020937167080144602	1e-08	0.041779056620124405	0.0322792185556194
DLD	16.626550228554176	19.673727739246228	16.700213614859493	16.15332893920118	15.21779514336001	22.01649893185668
GLDC	0.0453649626650568	0.0517559338850059	0.025802345657446	1e-08	0.0836668179074883	0.0596699287039084
CHDH	0.0064739790702147	0.0290824466293654	0.0354413323046274	0.0635824767169744	0.022502267498543702	0.029803947818965403
CBS	6.413777467948092	7.749891897082609	6.316122614836281	14.291864681525134	7.188465725998558	7.956103480710219
AGXT	1e-08	1e-08	1e-08	0.0084345530848345	1e-08	1e-08
GLYCTK	1.1053171582365096	1.1369676567644942	1.0290651669003124	1.7335932393838045	1.5651279799067888	1.5005383655539242
GNMT	1e-08	1e-08	1e-08	0.0227325145966729	0.022986251263116802	1e-08
