# Supplementary material for: Peptide-based Self-adaptive Implant Coating Sequentially Regulates Bone Regeneration to Enhance Interfacial Osseointegration
Source: Research Square preprint supplement (doi:10.21203/rs.3.rs-5132912/v1), 2024-10-01
Supplement: Supplementary file 869 [file 4_One carbon pool by folate(hsa00670).heatmap-data.xls]

id	S1	S2	S3	C1	C2	C3
ALDH1L1	0.8333147746050747	0.6104870381164699	0.608702938344065	0.2376055950126072	0.16017181096565788	0.22000264604160968
ALDH1L2	2.724782221717633	2.6625145631155362	2.2892924367826	0.7748106198885498	0.71716625666046	0.9809188051456846
MTHFD2	53.72063999559893	55.0316708307385	57.96744453470982	20.233377162095206	18.503804804277046	20.54669695444343
SHMT2	73.31020444711282	65.10657003373812	68.771430644406	46.96353590635853	44.112925693503314	37.956648726626966
AMT	1.0600678698472086	0.9461848608541517	0.8192855397300067	0.6491683986525105	0.7554957193369728	0.4848293043863891
FTCD	0.035931997755622905	0.040353529824407104	1e-08	0.0088224355891866	0.00446046006296	0.0045949703762973
GART	42.409464453803494	43.13951873691579	43.64088975615208	33.69147261926379	31.88765670897029	32.08345674599142
TYMS	121.49495870878131	118.85234389651127	121.59164942913979	105.27800701780063	102.30111643746244	90.628390659669
MTHFD1L	11.799838778230074	11.876657553977864	11.314272765786704	10.179627537365851	9.980714142323801	9.649269913563337
SHMT1	27.032441300508214	25.34232513626551	25.75613961792044	27.076042161535764	24.38419396308089	21.041744888325024
MTFMT	3.3590877554737584	3.9621802081897215	3.719721770109589	3.6112297019270736	3.1908296595579566	4.165944199663218
ATIC	49.45674245259114	47.47747819731818	45.75776004037328	50.141575837756136	47.699734379719246	46.09257670188343
MTHFD1	51.95065218098649	54.54875822145132	54.16141159405317	52.627377049851674	57.57486433742315	52.40413179312384
DHFR	11.648768336369473	12.561178584583901	12.106987221853508	11.964826591148368	11.378910871240617	14.25110722820849
DHFR2	2.6588909198562547	3.1256111289510886	2.875320838646654	2.9286315824843188	3.023014687866227	3.5844817215552185
MTR	5.104141206966332	6.011341202044077	5.1190995216815764	5.780532034521081	5.218950862903571	6.995419870647055
MTHFD2L	0.4797022865891089	0.6181357941857033	0.5992767513316875	0.5792946406987851	0.6708296076174701	1.0265735818841644
MTHFR	2.7078621892142185	2.7495817686997484	2.7646817467760205	3.5725780585787588	3.508582120186915	3.25770469899668
MTHFS	0.20532036460112268	0.4099299677289324	0.1737110972667565	0.4234655284389294	0.4281921844281841	0.3045723938872625
ST20-MTHFS	0.0768684020157906	0.09865973990579259	0.0765111025397878	0.0862792867055381	0.3053481038162183	0.15727812905289448
