# Supplementary material for: Peptide-based Self-adaptive Implant Coating Sequentially Regulates Bone Regeneration to Enhance Interfacial Osseointegration
Source: Research Square preprint supplement (doi:10.21203/rs.3.rs-5132912/v1), 2024-10-01
Supplement: Supplementary file 873 [file 5_DNA replication(hsa03030).heatmap-data.xls]

id	S1	S2	S3	C1	C2	C3
PRIM1	19.497238197358698	22.154135958824572	19.981492840903922	11.946466339925474	12.062429908654178	14.718048812220418
PRIM2	3.860348124671536	4.495362998615348	4.3396568048728135	2.9095565192193877	2.5118296654577508	2.5589849426950972
RNASEH2A	18.5292447740538	14.97288541147602	16.228239369933974	12.965573843070775	12.281604010247174	8.668132220894583
RNASEH2B	2.7966815204429465	2.692722312731122	2.613476584940474	1.9665655704441376	2.026862107823269	2.2177782442461984
RFC5	6.894579369461903	7.146728327150125	7.235555323882181	5.412740648641306	5.555254166472755	5.480336752320203
POLA2	8.164908735542308	7.988714397494506	8.450133848493227	6.24165891589584	6.3492616869964005	6.574924936327026
SSBP1	65.61739422524568	76.4538814582612	75.95050082940598	58.24311562116127	53.530400197127456	58.4824165768564
RPA2	33.72152724665198	34.862710825649145	34.49643856415036	28.10000799775895	27.96144917385325	24.857930535900913
RPA3	25.053311650916882	25.403805948831746	24.33552717241256	19.095889064392892	19.970218832848722	20.34540405813648
MCM2	47.173846360986175	46.781682691085976	45.16730167794749	39.706994195719204	40.10807450836403	30.70793891058804
LIG1	24.95699928173343	24.486666979213172	23.776275281505306	20.79404683911066	20.623206648478973	17.320625567664596
RFC4	19.28568827143869	23.29583900375547	21.35718867218325	15.016576277226969	15.184188956562101	21.391206865976546
POLD3	8.710272971321015	9.164494997321198	8.659270697130841	6.645489746129735	7.176036400156419	7.792321902520124
POLE2	4.3419384711429885	4.877671008187639	4.759694252182284	3.741235508484705	4.0129638705721415	3.743087629970144
POLD2	78.30809179154527	68.9751451420984	70.31819470656735	63.10618556790187	65.59954755327014	50.50292920329064
POLD1	25.468447961302537	21.61232660220085	23.92633890097145	20.90683873075364	21.165907782318442	16.91761598120156
RPA1	42.2071128461772	42.985067536897375	42.88681875000015	35.191322742422685	35.57501966452199	35.752262902912776
POLE3	38.35732762587956	41.667292606879776	39.98251094007771	33.42243482380784	33.98088073611915	34.073181087673525
POLD4	38.10784567823917	33.93242414024353	36.59904047706674	32.878287112767225	32.19403560388764	28.08110757790093
RFC3	2.653323273469381	2.9339447249325645	3.0708674549237465	2.303541607851067	1.8959550661526008	3.1245546778682565
RFC2	46.17361620424091	48.37476164928064	45.784038408369206	40.91302878778926	43.43750693895373	37.63762728185344
MCM6	21.600571176451687	24.31903194658661	23.90448725329429	20.380220382023644	19.50053978558684	20.910069363219367
MCM7	134.13055254648745	124.56680671053749	126.40555898310501	119.34067452282669	114.1122071590938	103.41995850409043
POLE	10.821686687074441	10.79733690581266	10.11305620598118	9.268275136455562	9.603713432822307	9.046806622091712
RNASEH1	9.074045541910548	8.587718544320117	8.98270848406011	8.223945615611578	7.6379960549399195	8.033688074937634
DNA2	3.3031817333868982	3.3447211258178373	3.350652628595652	2.324620649009298	2.705764597189205	3.901228116180036
MCM5	30.555185836276802	28.55766463659076	29.108443821781922	28.78719420816689	28.548037912778145	22.87154963858673
RPA4	0.06385990490542609	0.031874691969563704	0.015890775373648202	0.0313592086487436	0.0475638476906032	1e-08
FEN1	41.570700942111095	40.56148146751901	43.44327160799347	42.987301514835856	40.142369057767844	39.67200127217254
POLE4	15.91491037298491	14.980809973416314	13.422988912313045	15.028402848302207	14.970685404541006	13.378245994561256
MCM4	26.514848475854667	26.67128128772049	27.216339789684593	26.89565431876405	25.698133589643966	26.241353504041662
PCNA	144.25169699590452	159.8896931268899	153.59270954802818	141.35848066659202	150.27316841061926	159.7950186550005
MCM3	31.760917599875842	32.991419515312955	31.882738687173312	36.35253380903511	33.43776914840223	32.12576537132603
RNASEH2C	6.854858747825551	7.491574601001519	7.010440954878134	8.91478588824701	8.976887637655627	6.781570868882617
RFC1	5.513594411309245	6.611976659442751	5.908558183354704	7.440053223343797	6.142852146738169	9.796832183760456
POLA1	1.5890173021031697	1.8170943164717532	1.4772596319967588	2.0280054465263317	1.9892292792798976	2.516823456746256
