# Supplementary material for: Peptide-based Self-adaptive Implant Coating Sequentially Regulates Bone Regeneration to Enhance Interfacial Osseointegration
Source: Research Square preprint supplement (doi:10.21203/rs.3.rs-5132912/v1), 2024-10-01
Supplement: Supplementary file 877 [file 6_Glutathione metabolism(hsa00480).heatmap-data.xls]

id	S1	S2	S3	C1	C2	C3
CHAC1	2.8751129893138563	2.6984190657361347	3.2001038213089363	0.390172180656791	0.5287478192229532	0.20111736796009008
ODC1	63.721372954337724	67.98156052825054	68.67909736956574	34.93383527287309	32.98579752377649	33.152349558659985
RRM2	76.66702101397529	79.567894238158	78.49797466636564	43.65649746024955	42.019063238080726	43.32329756919509
IDH2	17.26059275799546	16.513537168847087	16.5661229120283	11.651148431033224	10.217078221616116	9.319077553793148
GSTM4	5.644801181092335	6.027212600608424	5.875823241312126	4.122387319291884	3.8603908548595864	2.993180851053966
GPX8	10.433685079228141	12.775882538312677	12.798041063567332	7.853346846002174	7.4463407650398254	9.056954862532368
GSTM2	0.0879160529106471	0.1755277594239215	0.0625052898358327	0.037004813246626404	0.0498904701091551	1e-08
SMS	52.54857052156662	52.80441752324514	54.29670287189568	36.90553796409138	36.734257970556754	37.67278451209394
RRM1	38.557752137538714	42.86499399337551	42.51128083907994	28.64046735115111	27.97247757950863	32.46605118917173
TXNDC12	82.82438955291249	92.51356318242415	93.18856552619363	66.52269331305314	63.6320844503751	66.59462120745168
GSR	12.871325960087733	14.57809697592159	14.976705933084933	10.52093880517343	11.412812745253513	9.48956246017234
GSTO1	92.84892615538928	87.8684325110443	87.45942720227075	74.60353359536118	71.22726417832475	72.7047077707094
LAP3	20.17007120713212	21.26065818455621	22.545176248854037	17.5949379861095	17.141929599064305	17.65886539874469
GSTP1	446.71677010895706	400.21179636048083	412.8922657817193	363.50262687312136	356.77884988709326	312.9694483478547
MGST3	105.68974688799555	106.01163263161517	106.47780766747795	91.73600300129183	90.31173622469936	81.26568396123928
MGST2	3.5057000015201583	3.276682670077712	3.0919629551486656	2.997700798221481	2.7959264690302423	2.6171421019356123
MGST1	20.11998310469668	22.78658204857324	24.021101361745767	19.497567331919612	17.657892264001973	19.934349895041183
ANPEP	0.0067954694851613	0.061053288970351303	1e-08	1e-08	0.0134969789490388	0.0069520032569083
GGCT	24.14720501967277	27.56796125134738	23.997232541383326	22.07744862946712	19.161638609617757	23.94720950688936
IDH1	35.891665416868065	37.61000681501753	37.115759771759684	33.507460041258945	31.891123017642705	32.29792391331402
GSTA4	2.492278763586854	2.1921929728892438	1.5959710711798434	1.5234118855743775	1.7827285941208602	2.2287487229608924
PRDX6	131.58576961243458	127.68016838562033	131.34084292290436	119.52196729061163	117.95831748269602	115.78647610517712
GSTT2B	7.3224871550538175	8.220762491158274	9.082871799978035	7.891084152549815	8.62014861022729	6.261608771221138
LANCL1	20.41182753975832	21.024034098506984	18.624738022350773	17.42678291630121	17.818706354246988	23.199265850637737
GCLM	4.285421891229793	4.546596262004288	4.676915737162044	4.258605699678145	4.383588144992436	4.958582399416812
GSS	54.58000673911234	49.882650111775924	50.98174618907635	56.2657723749494	57.36577808521245	45.84012157344875
GPX4	602.2431176550065	572.8883863435203	588.1992300047433	662.2067310941426	664.6858619650188	485.891992760284
G6PD	97.47786032674816	91.75544460582813	92.28119874775257	100.26909186238008	102.28928893491731	91.6552405244549
SRM	39.47264448361809	35.416981541841714	37.20109556249248	39.87140377982651	38.86645023717864	38.76799653093842
GGT1	0.7647500308735778	0.5598460106117856	0.4990058254181456	1.0431668023072356	0.5400629640577536	0.4954985263201735
GCLC	7.139101611927282	7.699487978742222	7.086449389402424	7.126747317570767	7.141548372780731	9.751408080409364
GPX1	295.6295713855548	281.6103799637469	283.48100216919204	328.65505013360405	333.1842792649533	290.8245988072884
GGT7	15.428098513700288	14.081275442925875	14.94688204570199	16.977814655423366	16.82440975972158	15.633166675505414
GSTO2	0.0550394774323009	0.052981920203552704	0.021522151579463602	0.0656389956483569	0.0507547918134929	0.0402195132147891
GSTK1	84.1801134743327	84.75956056936552	88.08569062920695	99.55291204030163	96.70679480253452	95.52522478856132
RRM2B	3.703949892973853	4.28421514634934	3.819455596894014	3.943311973338154	3.751912489342052	6.184089573902512
OPLAH	3.752705359342328	4.175165391520501	3.678235142037007	4.85039587001134	4.96712210754457	3.77467486726947
PGD	76.01522436543912	74.1645097284748	73.6169746199286	93.26121697968183	92.03189079165955	78.06502302105245
CHAC2	3.1714689479998137	3.892292635227182	3.472400066030461	3.0964566136534764	4.372310243251556	5.286665414029656
GSTM3	2.132846136062594	1.8577325661300343	1.9785969096533784	2.373622032903452	2.346113420784437	2.6579315415925846
GPX3	1e-08	1e-08	0.030416689733608903	0.0600249791926872	1e-08	0.0625252990467949
GGT5	1e-08	1e-08	1e-08	0.0530973506932418	0.0089483441530802	1e-08
