# Supplementary material for: Peptide-based Self-adaptive Implant Coating Sequentially Regulates Bone Regeneration to Enhance Interfacial Osseointegration
Source: Research Square preprint supplement (doi:10.21203/rs.3.rs-5132912/v1), 2024-10-01
Supplement: Supplementary file 881 [file 7_Arginine and proline metabolism(hsa00330).heatmap-data.xls]

id	S1	S2	S3	C1	C2	C3
PRODH	0.5366173778364705	0.7457625311129878	0.8064211070353305	0.2790134124260844	0.20898349626205048	0.1291713929483849
NOS3	0.38159880015441777	0.3134302613298843	0.2355876952524577	0.08539239732124919	0.1295182957207271	0.049416331347108
ODC1	63.721372954337724	67.98156052825054	68.67909736956574	34.93383527287309	32.98579752377649	33.152349558659985
P4HA3	0.4859582346461695	0.5733202320334843	0.5936310854217864	0.3688008739311229	0.2851721100341267	0.19208157978788098
P4HA1	53.1177247713761	60.8428140019339	59.88047092429737	33.640103014536706	33.343444644649644	41.089030344859
NOS2	0.0059213982579924	1e-08	0.0058938744752475	1e-08	1e-08	1e-08
SMS	52.54857052156662	52.80441752324514	54.29670287189568	36.90553796409138	36.734257970556754	37.67278451209394
ALDH2	2.0109755521112533	1.9112807518837895	1.7967983187693384	1.4326637449410349	1.3089631909592638	1.313792945496128
P4HA2	45.84511111317773	46.37110255855634	47.18884838206992	33.41708925992499	35.109189357070356	30.387773774000657
GOT1	38.163874210584	36.85344929064389	34.96611083521063	29.20876301429696	26.358734248084758	24.38415150518452
PYCR1	60.49071553282207	56.69338543010046	57.58746139555304	43.42247012131283	45.24790434315156	40.80691358928227
ALDH1B1	20.78110830079014	20.657371724690783	20.00033353791676	15.291534283057473	15.811465232539941	14.726501476980305
GAMT	25.51363102072282	23.602834390013214	24.228997114038002	19.10570879868234	20.907436724040465	16.34070575235854
CKMT1A	0.3222312827072628	0.3735563829988944	0.2483097994780427	0.32668014283499247	0.0929043340367375	0.1807779481768245
AZIN2	0.2218034617707548	0.3655179915339289	0.2803459979320471	0.2800783490765656	0.1538395076478657	0.1764876703112634
AOC1	1e-08	0.0080071764851078	1e-08	1e-08	1e-08	1e-08
LAP3	20.17007120713212	21.26065818455621	22.545176248854037	17.5949379861095	17.141929599064305	17.65886539874469
MAOA	3.017415974454812	2.8536568338917787	3.138217552845387	2.6194223457422083	2.4306441386450803	2.33191654785552
PYCR2	32.332492871670475	31.72896914770292	32.32976216268736	27.43033905660821	27.412625132351	24.235434740914965
SAT2	33.400210159372875	31.752372153401495	30.938950639810038	25.55045407183104	29.83801214265168	25.355610261265774
AGMAT	0.3299256059734292	0.6988742970612596	0.36043029408081	0.395156309612602	0.2876882302158619	0.370454771840259
GATM	0.050415716504283704	0.06710460362013419	0.016727131445945502	1e-08	0.016689075856352	0.0601732174918969
ALDH7A1	22.9139756476708	24.26743626509844	23.58262950096456	22.30932221680025	19.610076184911122	20.827055695453502
CKB	16.8756713680513	17.977320640833973	18.040855028987085	16.524934254468405	17.56966805432022	13.208205927786565
ALDH3A2	25.646334789181356	29.0681111378375	28.142010194167444	25.20594866964349	23.723677421394765	26.64431329590549
SMOX	36.29444636912232	34.362131619493454	34.849286197636275	36.32540898173556	34.33537616455218	29.258743514396684
ALDH9A1	33.54277049219136	35.05153791617357	36.32466467696353	33.91268013730011	33.477551722633066	32.42697049163805
L3HYPDH	0.993608185147212	1.355038811845419	0.8430731866581725	0.97584740810806	0.7279227058535747	1.3497733770451816
CNDP2	34.252577244876456	32.17933493563651	35.005326921815325	35.734178477302045	35.19252894435967	29.50775629165075
OAT	22.94218543784737	25.534723984721175	27.988869259616802	24.50743186279368	24.65674059953373	27.00504199263468
ALDH4A1	15.897037677946502	14.141011150252027	14.352261195180079	15.634867603605272	17.1138593562252	12.117249257762927
GOT2	94.62184726429271	87.41325423612265	85.40685808984139	91.6574585437852	90.3716845493472	89.95022121376066
CARNS1	0.1226132947132379	0.1372375635792347	0.07026739559972159	0.047438809686447904	0.21032257439646118	0.0912274196490607
ALDH18A1	43.101241537070464	42.61906248215674	41.3295362077056	44.877069617247194	42.958722530099905	42.84797413263162
SRM	39.47264448361809	35.416981541841714	37.20109556249248	39.87140377982651	38.86645023717864	38.76799653093842
PYCR3	6.900766750318848	7.149199325004673	6.230777671768003	8.29977211915223	7.955770587213408	6.312584623189427
HOGA1	1e-08	1e-08	1e-08	0.0100164616568468	1e-08	1e-08
CKMT1B	1e-08	1e-08	1e-08	1e-08	0.0108908931347924	1e-08
PRODH2	1e-08	1e-08	1e-08	0.0664227525553837	1e-08	1e-08
AMD1	13.834812325894532	15.910764378521401	15.1260814494794	16.838718171269367	17.602482746889514	24.547904115278506
ARG2	5.134856865660793	4.553526005651968	3.9435042333380137	7.052619787737863	6.67835109798674	6.493092592186848
SAT1	14.85530239768703	17.183176939873867	17.441214549106007	33.388678446143714	31.995409479370892	35.03497855888017
