# Supplementary material for: Peptide-based Self-adaptive Implant Coating Sequentially Regulates Bone Regeneration to Enhance Interfacial Osseointegration
Source: Research Square preprint supplement (doi:10.21203/rs.3.rs-5132912/v1), 2024-10-01
Supplement: Supplementary file 885 [file 8_Mismatch repair(hsa03430).heatmap-data.xls]

id	S1	S2	S3	C1	C2	C3
EXO1	8.018279045766027	9.034926808526093	8.672480490980208	5.8536080914511	6.138165341166898	6.940983527847895
RFC5	6.894579369461903	7.146728327150125	7.235555323882181	5.412740648641306	5.555254166472755	5.480336752320203
SSBP1	65.61739422524568	76.4538814582612	75.95050082940598	58.24311562116127	53.530400197127456	58.4824165768564
RPA2	33.72152724665198	34.862710825649145	34.49643856415036	28.10000799775895	27.96144917385325	24.857930535900913
MLH1	16.94982395272323	17.87514440111426	17.765465409854215	13.829188625624715	13.639690135164972	14.21969124242476
RPA3	25.053311650916882	25.403805948831746	24.33552717241256	19.095889064392892	19.970218832848722	20.34540405813648
LIG1	24.95699928173343	24.486666979213172	23.776275281505306	20.79404683911066	20.623206648478973	17.320625567664596
RFC4	19.28568827143869	23.29583900375547	21.35718867218325	15.016576277226969	15.184188956562101	21.391206865976546
POLD3	8.710272971321015	9.164494997321198	8.659270697130841	6.645489746129735	7.176036400156419	7.792321902520124
POLD2	78.30809179154527	68.9751451420984	70.31819470656735	63.10618556790187	65.59954755327014	50.50292920329064
POLD1	25.468447961302537	21.61232660220085	23.92633890097145	20.90683873075364	21.165907782318442	16.91761598120156
RPA1	42.2071128461772	42.985067536897375	42.88681875000015	35.191322742422685	35.57501966452199	35.752262902912776
PMS2	5.893023930662395	5.416989591401348	5.007462606115794	4.561185380912021	4.665058494700778	4.596596172512703
POLD4	38.10784567823917	33.93242414024353	36.59904047706674	32.878287112767225	32.19403560388764	28.08110757790093
RFC3	2.653323273469381	2.9339447249325645	3.0708674549237465	2.303541607851067	1.8959550661526008	3.1245546778682565
MSH6	25.041083050435617	25.706453332483626	24.97145016337988	20.59966107332186	20.938456732871558	23.97306208952377
RFC2	46.17361620424091	48.37476164928064	45.784038408369206	40.91302878778926	43.43750693895373	37.63762728185344
RPA4	0.06385990490542609	0.031874691969563704	0.015890775373648202	0.0313592086487436	0.0475638476906032	1e-08
PCNA	144.25169699590452	159.8896931268899	153.59270954802818	141.35848066659202	150.27316841061926	159.7950186550005
MSH2	5.040457928311226	5.774000188713592	5.2270894891001385	4.8129834928260955	4.973933620975567	7.252831887317727
MSH3	5.5999220568384125	6.530328168815019	5.545995152695007	6.116420078653678	6.340560394287753	7.541066339470657
MLH3	1.5758069392830991	1.8547778119921343	1.5274555781374117	1.7811865242104998	1.6058472099424541	2.3905873742522337
RFC1	5.513594411309245	6.611976659442751	5.908558183354704	7.440053223343797	6.142852146738169	9.796832183760456
