# Supplementary material for: Peptide-based Self-adaptive Implant Coating Sequentially Regulates Bone Regeneration to Enhance Interfacial Osseointegration
Source: Research Square preprint supplement (doi:10.21203/rs.3.rs-5132912/v1), 2024-10-01
Supplement: Supplementary file 889 [file 9_Cysteine and methionine metabolism(hsa00270).heatmap-data.xls]

id	S1	S2	S3	C1	C2	C3
PHGDH	45.76461523776405	41.610531537069136	44.54668962896144	12.314874224157125	12.643208433981197	9.974991831151183
PSAT1	76.02569701558674	83.35503868659886	81.86409437326512	23.48442908328672	24.94621950593289	25.871751524920402
SDSL	6.814724479033201	5.189863601772133	6.631536905282147	2.483967000286946	2.337269551806229	1.97651346664498
MAT1A	0.11039610491629509	0.20571604256952508	0.16116167300934028	0.0578254826856266	0.08039751342501489	0.045175639940725
DNMT3B	4.023587168058511	3.882377580176199	4.229757946605637	2.4513004797523346	2.5961842564728395	2.476366074569333
ENOPH1	16.272776590341394	18.034979691079446	16.41135387577391	10.885541140561976	11.185151356310651	12.378686495841457
SMS	52.54857052156662	52.80441752324514	54.29670287189568	36.90553796409138	36.734257970556754	37.67278451209394
GOT1	38.163874210584	36.85344929064389	34.96611083521063	29.20876301429696	26.358734248084758	24.38415150518452
CTH	1.8736429030655304	1.8130896315042735	1.849349435379147	1.0507828817380789	1.3527586125500148	1.6444989681440125
BCAT1	0.9597175158860248	1.1764224390143478	1.125908139939831	0.803210375769768	0.6262559517404952	1.056419140413207
CDO1	1e-08	1e-08	0.0917001110464535	1e-08	1e-08	1e-08
SDS	1e-08	1e-08	0.0154452398958824	1e-08	1e-08	1e-08
APIP	19.59199643313169	21.67646801255143	22.071580385784298	16.38217794610591	17.75758496127911	18.30991556600197
IL4I1	0.0708689177608997	0.08085286182523489	0.2620038488435662	0.1292610971131141	0.0402165882099409	0.0103573495473857
MDH2	155.40025855266964	146.97371790785257	150.77099604050642	131.4988022774056	124.6689831727214	121.67716587853167
LDHC	0.0708545164384528	1e-08	1e-08	0.011598006655296299	1e-08	0.0120811172956704
MDH1	89.01029287381458	109.05377348676672	101.69385884404967	90.63809453310235	91.5531058042436	95.1273393242192
LOC102724560	6.670736998163888	3.1674089289709277	7.6353725235331495	8.898022208321958	2.9674773023981365	2.1183660801291637
AHCY	121.77959880562172	110.55534881995133	117.12279715790767	113.43802514968345	114.84006949030568	99.59841652242828
LDHB	368.94327488409607	419.7333121103852	413.3839148111448	359.89612907509826	360.30762694747193	441.0417953822654
BCAT2	31.996806648181558	31.272431383837485	32.381710349686735	33.4233212547329	31.001197233546602	28.62030868806372
LDHA	1885.7170748439594	2008.5737169125264	2026.353548622692	1965.254271972459	1891.2933728800895	1959.0143687947948
DNMT1	28.17233115941933	26.04347951317272	26.97152872733087	27.62708005976372	27.88863263993	24.509664777432004
KYAT3	11.533430823043261	12.45962466214668	12.309550804805705	11.102968004754636	11.646488721733038	13.200977760491927
GCLM	4.285421891229793	4.546596262004288	4.676915737162044	4.258605699678145	4.383588144992436	4.958582399416812
GOT2	94.62184726429271	87.41325423612265	85.40685808984139	91.6574585437852	90.3716845493472	89.95022121376066
GSS	54.58000673911234	49.882650111775924	50.98174618907635	56.2657723749494	57.36577808521245	45.84012157344875
DNMT3A	1.8269944839573948	1.7890341111272041	1.9185096711162348	1.7882953625494664	1.8021470629569902	2.0935367443978086
MRI1	3.788523235060885	3.324645670381596	3.054367502198573	3.59225344002864	3.4951435632762107	3.3624913938041323
MAT2A	95.79324278852815	99.60787198466369	90.30557809037987	92.96950414455335	97.92308503552886	103.70708127226456
SRM	39.47264448361809	35.416981541841714	37.20109556249248	39.87140377982651	38.86645023717864	38.76799653093842
MTAP	2.9932648843880005	2.8770918394586302	2.803585043779369	2.811292876257383	2.8361770263549477	3.506046483256858
AHCYL1	40.73189251836735	41.66228812782657	38.875951443314385	40.978670717674106	42.73545714019159	45.40379961788943
KYAT1	1.474917690803773	1.7746755028606935	1.4568980125973023	1.6964048475082592	1.9659576876597904	1.4170967575304039
TST	8.359387640594939	7.719589076071977	8.38503179952957	8.422107081613152	9.395611174277358	8.64033879321635
GCLC	7.139101611927282	7.699487978742222	7.086449389402424	7.126747317570767	7.141548372780731	9.751408080409364
MTR	5.104141206966332	6.011341202044077	5.1190995216815764	5.780532034521081	5.218950862903571	6.995419870647055
MAT2B	30.595078154360046	30.8804547860884	32.33380857407632	33.65921806973977	35.054842597279894	39.03286202633136
MPST	29.28305357129795	25.285166541051805	26.57853376485249	32.15126089265524	33.63204639683602	28.47350096942341
LACC1	0.7352135602026918	0.860633225857173	0.7448639304137069	0.743561820870053	0.8648578424061892	1.3252153262580215
CBS	6.413777467948092	7.749891897082609	6.316122614836281	14.291864681525134	7.188465725998558	7.956103480710219
AHCYL2	4.24659567864258	4.203621608705895	3.8070771632927967	5.461083748111031	5.022671879091862	5.253789839183093
AMD1	13.834812325894532	15.910764378521401	15.1260814494794	16.838718171269367	17.602482746889514	24.547904115278506
ADI1	5.11627372251674	4.670471863677383	5.295804699959587	7.097797309313768	7.341233618797657	6.477978917071419
GNMT	1e-08	1e-08	1e-08	0.0227325145966729	0.022986251263116802	1e-08
