# Supplementary material for: Peptide-based Self-adaptive Implant Coating Sequentially Regulates Bone Regeneration to Enhance Interfacial Osseointegration
Source: Research Square preprint supplement (doi:10.21203/rs.3.rs-5132912/v1), 2024-10-01
Supplement: Supplementary file 893 [file 10_Influenza Viral RNA Transcription and Replication(R-HSA-168273).heatmap-data.xls]

id	S1	S2	S3	C1	C2	C3
RPL39L	8.472604996629375	9.071823075905481	10.099464225251996	4.630321193197212	5.8694689244673075	6.116371306501456
NUP37	13.496553581883452	15.199446155621965	13.591246499349783	8.77128205033827	8.240908111821536	9.870167489767384
POLR2G	118.76487257317855	120.47662664929658	121.31544666963599	87.38869077795538	89.14581625914424	77.8222472569665
NUP107	10.658919664461056	12.741506203966665	11.33544655435345	7.868910323940513	7.077937547006284	9.611737095538246
RPL26L1	20.57337062990481	23.57774983703852	22.313480701833242	16.863760119167683	17.790295122336076	14.260665282333353
RPS18	2939.0138233683697	3050.765872392649	2941.9242564167657	2442.007629866757	2451.6048053152244	1732.668579370226
RPSA	1887.0930684367208	1777.1666838693982	1874.2220822281788	1488.428117526128	1457.0528960748425	1193.6771953446587
RPL26	1000.098935336472	1034.0111571422542	1015.0022474466564	781.7785782349533	821.6947604394038	711.5815363153158
FAU	552.8399060086582	510.95367171981246	532.5353490100554	440.9115725053538	443.68224596485163	328.65967166105804
RAE1	28.538967632932525	27.0310866896356	28.602218477797948	22.57176023374374	21.7712262881256	20.08121288479429
RPL35A	444.9744821947991	455.8205854328598	491.38945939494903	409.8011474859657	381.1023492719529	254.1691125028461
RPS15	1096.5985947192135	1042.3108866976677	1091.4634251280806	885.3609418539972	944.1035735222628	658.7096651675139
RPL24	795.1480603591147	892.5992414001828	930.6721855391178	732.0144141534827	737.0050624428751	581.5594369259356
RPS2	2908.5769644602947	2703.40814573526	2811.979393656592	2325.347298211641	2352.4802328514124	1925.7043023725523
RPL12	1746.3606313776543	1770.317825578628	1837.5970795272567	1435.5499204618302	1472.483387846823	1305.8216773388388
RPLP0	1659.8085657931358	1516.2772532900474	1565.1702789847207	1334.5387467215255	1369.4972090331985	1028.0634779977638
RPL37A	295.076895616937	311.40136742688975	303.9625115241484	266.7483450346286	264.06323537700786	189.185391803588
RPS14	349.3495682913157	366.2210762458837	356.97854594729324	301.5961308721416	288.75979695809485	260.3219770661293
RPS6	576.8437718053892	685.1193968656604	703.1082138607559	541.1076685565432	523.8414948210308	500.573170928596
RPL8	1975.0415218230348	1971.6462858038167	1992.1103067510167	1720.1217981298369	1778.9639873963438	1236.7819182614985
POLR2D	13.911012368656001	13.294741319306029	14.048092670014801	10.865794279391208	11.109809783877383	11.090823400918152
RPS12	1179.4643281440765	1390.9021262254064	1210.6981427211465	1032.3360913202582	1037.4174170082115	967.6975590450152
RPL36	396.0427981765342	383.9238445594786	397.4861394528692	323.62213630218395	361.98685891218736	264.33302708492647
RPL7	451.2568593370724	521.2668001479825	506.3348912854126	394.4169867486322	386.5067534836086	416.6672988948283
RPL36A	0.4909072178800825	0.5227280401973141	0.06515005988933309	0.1928529005073855	0.0325009240592821	0.2678481601873211
RPL10A	647.3099093447588	667.4127753756953	681.1683112328237	557.526751159356	540.5101937015827	523.2464332441033
RPL18	1064.5782153684731	1066.5635418603715	1100.341838059299	963.4950404964636	960.6711665541122	701.0108352739047
NUP43	8.907293303892684	9.178590847633712	8.776786018020811	6.839470823871419	7.156587384193145	7.830316237053982
RPL10	673.099844007422	649.4385685763456	665.1187117590868	566.1418673969733	565.6965015968461	490.61719766735183
RPL23	275.4683648520426	288.71818361865724	289.4409541450515	247.5395014500441	236.34551804469385	218.03141324569478
RPL18A	1300.6961234852206	1240.7989172263956	1267.6319194505909	1126.6726955125612	1119.2746292437075	887.868719956636
RPL32	368.69382274405723	383.7942625430861	377.8943238087016	328.01316105843983	327.3442170552769	275.5341735660912
RPL27	877.3686797953015	939.9543918618268	965.266590362192	795.8415407401835	852.4529825995603	644.9644103181204
RPS4X	882.9405974247893	1005.2850850853604	991.684666763844	806.5219964322978	798.6607265574993	771.3032062121655
RPL11	777.3859522709358	872.0363423490418	932.340428878032	757.6562618916063	713.0220191158662	661.5280388967213
RPL37	150.23130927689033	157.46640062676516	153.46437939807714	134.6908431928843	140.64575932338064	107.20851667532665
RPL21	807.1800454810306	862.2720945484785	861.0661090270357	697.676792109908	681.4301275233901	720.2559798423372
RPL28	196.0187764002504	192.63459768909905	190.8865315817496	173.4986267757269	185.0671878501004	118.27117428113685
RPL7A	1985.746110636384	1955.79311286734	2008.6278569935155	1778.5608154761892	1724.7709287396242	1455.5520738330217
RPL9	438.582807483606	453.9475115536814	473.1383504725754	398.3514205594696	396.82477429918106	344.4583392810293
RPS3A	398.1563752807231	431.9025892160423	435.1922923424055	351.71143721704027	336.3890728099495	370.042454535637
RPS20	297.0031915623664	330.124774422599	322.84361733985946	279.9909387538041	282.0251722462869	234.77223958878452
RPL3	1280.7619306791005	1308.8172363921924	1312.318259252441	1168.2753311509273	1153.5860141918088	960.812029304133
RPL5	1061.5788144426117	1240.4038689855738	1222.237909565295	983.2133746398064	946.5259222519568	1035.7929956140872
RPS19	310.40336481947264	311.042641255122	316.5174644885449	287.62689212103203	288.26058598925187	213.9642456520161
RPL13	447.3742367219069	438.31950256548583	455.0826035566913	402.21098507244415	412.44147524710337	315.1941363354265
RPL6	186.7616594638392	219.01568711593205	220.59898594089424	178.8355049508524	168.4286092551591	180.63857888129172
RPL35	1708.5517085912093	1641.458677624742	1755.454257099344	1458.7896814698736	1413.6225113097848	1434.380621297683
AAAS	31.944702838752463	29.88546888770718	29.50507828625156	28.41638809882073	26.155254679025113	22.549169304454065
RPL22	298.6226258868205	321.36360582366314	332.0434408114053	277.9986113324522	275.35331054938064	253.94990476337162
RPL41	2225.4190914719375	2248.084540844138	2301.1417337680027	1998.0634031449522	2060.7947368740206	1699.8223585439819
NUP58	10.355515524634292	11.275141707450867	10.356323972052897	8.6974876857714	8.35020030111242	10.166470046358501
RPS8	1265.595589449008	1338.6948533028756	1361.993823658698	1167.1087588096873	1112.6758945716695	1095.5993773324635
NUP155	11.8992270940444	12.9034196529047	11.310807587139992	9.9506446564992	9.574140241914973	11.217481339869352
RPS13	577.643649378727	655.0519319549082	636.2505658782869	578.086297832922	526.0145280457991	492.27275319376616
RPS9	634.5940465475151	582.993504704871	613.8104158789223	562.9665656029438	564.927120833178	438.8866892332903
RPS21	234.42616038585084	258.7637010834403	237.54717392978696	214.6409610195732	229.802747397698	181.72113295996084
RPS5	1068.6785360168044	989.0881576739692	964.2516428829756	903.3429791905464	899.9078091162131	790.2633301735809
RPS3	642.5839570971215	641.7740545046755	618.9634621509825	581.8799834440064	553.7993969748265	498.16528730789736
RPL34	101.4937261683842	108.15176939600072	99.58544803837289	91.19412132401841	91.55349695362594	82.94160754818873
RPS15A	202.27266613014288	209.05508619578106	209.8957315410353	189.78564247587425	183.12444550121344	161.3519293349764
RPL29	736.9151889437987	718.4773346493572	740.7972418401507	672.3810030970515	651.0690733415196	567.669548950683
RPL19	984.9838272926588	1035.311652920721	1076.736343431338	920.2735316660968	904.6532586697124	841.957747384206
RPL4	670.0731870881708	688.4694076955118	714.7922511730103	607.0781617768	590.1136540745152	591.1122235518476
RPS17	1964.2060498825458	2007.3721076751035	2076.6364795603986	1816.8697160824079	1888.6430344472383	1521.2249074474428
IPO5	39.67593137749319	40.17376076066362	38.405572844533886	33.83683701411408	32.16664800916823	36.33381970379622
RPL14	75.82941919133062	82.39453420851552	75.53600499374265	69.39409218799554	67.76327175303132	65.23295125518136
RPL22L1	5.971000909043628	5.777663183410519	7.011988213362512	6.224355779649691	5.214517063230592	4.809138205519581
RPL30	1121.8914031048498	1190.692186114006	1149.6298655418748	1020.8930446947932	1066.5569789075225	911.3111099786056
NUP62	33.00657185472498	32.32678781044616	32.88236657186696	29.59147859820223	28.50074485034579	27.025515340479703
GTF2F2	4.79401329838559	5.438777059877468	5.020999242734184	3.970449093172968	4.1112022335341845	5.186789019701697
NUP93	12.869597420742412	13.356615092056726	13.63973696358202	11.623970813092132	12.592683187830675	10.56763461453949
UBA52	121.7287111574003	121.45179972284271	124.73427423723084	104.87670169138578	112.95225235742936	106.77760022790191
POLR2C	56.1500072634938	50.316462261954264	51.20934268214047	46.11935481184961	47.62962895001654	45.642752110656346
RPL17	32.67298216482981	32.616430610919856	31.413444395826463	28.24177483596776	27.031901902507624	30.76157614239912
RPS7	538.1530922374027	627.6699669254101	621.2976655975999	564.2548007456487	507.63870312623493	521.8681365011582
RPL39	1610.3549698401298	1593.0966048487976	1586.7247040995248	1421.826066744038	1391.527635486288	1461.9097952601353
RPL38	314.3513087065547	336.78037339985923	332.18055938074286	288.4805261855938	286.7970637387619	303.41215619547364
NUP88	14.24854930276536	14.460295510170093	13.48826298008875	11.991041927541797	12.294736966558887	13.695160471745316
RPL27A	244.7040765053541	240.695106737574	253.83778959842812	235.8208972514309	235.6934467600104	194.25321644508722
NUP85	18.30863587812673	19.024215330043464	18.68921175414595	17.491245963885355	17.96525166621282	15.22840218346903
RPS25	1284.3533795104097	1401.911866436572	1435.7434825719051	1219.0080147628962	1191.136361978909	1320.1104731909259
RPL31	223.94213277384304	232.5421865653912	222.37215927464652	197.21548720543706	204.65211237583696	212.8766191573221
RPL15	173.55391299647192	167.95507020433004	175.1331793231044	162.56235303004655	157.48053448104605	148.060480459369
RPL13A	2239.869098051186	2248.3682279068244	2319.465746151882	2154.535551821368	2194.6047559207086	1822.3289533633047
GTF2F1	47.93199624653836	45.904829315692865	46.397269316841104	45.85799782546493	46.154956252421854	36.21608214916333
POLR2J	41.54980203126645	39.825502650051774	43.507644341819	38.08261084903432	40.07538709459465	36.141059970333146
POLR2K	40.237802850620646	44.71004757858539	44.42232417997516	38.38206967186464	36.5905037421629	44.09733012054537
PARP1	81.51527762457334	80.09920081822145	82.3640180270623	75.97534481468172	77.9363013762368	71.46689264135647
RPS24	263.69241649150644	277.5772507868852	281.2231015128385	248.68852543257	254.2513099094724	270.9905880278701
RPS16	1300.22440402533	1337.732985390323	1343.0086922070786	1191.0690147368612	1188.4879637437186	1370.4292422761566
RPS27L	4.235133891281132	4.773064088761487	4.450766720185222	4.199463760961546	4.132993906349438	4.353540716903102
RPS27A	426.96841843667727	512.1623898969508	508.61486055533896	429.4539624940777	424.1293350882559	520.7918900674688
POLR2I	116.43114790201719	118.4745233450888	108.55939578157799	101.15359030595656	114.11885284202792	111.75125152648626
RPLP1	715.169900393452	767.2355412355148	775.6355671084198	736.6387950623724	788.3653428672684	625.2134793076809
RPS27	998.2613763439446	982.7826814287608	1027.919191601943	958.5121637765568	994.6217442654536	915.3699639954496
POLR2H	31.104221548887377	32.740052868693326	32.19584073888305	29.015423776505706	31.194824821238704	31.47214288162684
SEC13	46.273339037476404	46.28152891398286	44.34179483958358	46.69472368635697	46.118133481760566	38.97062784733534
RPS11	2005.3812463401127	1894.6077326396367	2006.3131255886772	2023.791333371021	2069.6030181438637	1631.1041990011363
NUP98	27.101682397575733	27.08001150864912	26.64543214159141	26.263418407820303	26.760558171863014	25.394998014821578
RPL23A	906.323987436792	1013.3033691317452	1016.117790483976	911.7845419669004	963.6256990633034	983.1500621965856
POLR2F	16.0689497499328	15.678625471626745	15.941546322813124	16.509875079883532	15.146452721972413	14.953078628970585
POLR2E	80.50283762879647	78.72359720823975	79.17551463351349	82.66355445137239	84.94709076174543	65.42467395930375
NDC1	13.571372361305825	13.11271449599444	13.205085290637564	12.18882189895939	12.053651429137856	14.82964838429992
HSP90AA1	168.1159154199381	218.43309286558292	185.98174191972402	164.42776654863044	156.91357148038608	238.58072486143644
NUP133	13.06957492990141	14.039916089980787	13.322978803800432	12.601123162874776	13.140697441403141	14.075123293306222
NUP54	5.375077492252539	6.618619979379727	6.285737251596398	5.490157727255657	5.412403784951597	7.110196124902792
NUP160	15.010438572546326	16.65803615754994	15.834169570171328	14.54084133735755	15.26489196139505	17.079689309242134
RPS28	95.82009179204174	112.21661532832125	103.44529820928307	104.25919682878775	113.2148081358677	90.34528176297671
NUP214	11.18899928860837	10.729759944579433	10.541764669728183	10.695337469020524	11.208547895558153	10.358412856820703
RPS26	143.1839675292662	147.75592708733316	153.34755857785015	139.42299720231438	142.64979041716882	162.3731023406344
RPS23	232.0441183182433	239.9299054576137	250.86123875015028	233.97375832668084	223.99817860320306	265.2971374818666
NUP188	23.41690374724002	23.293338526481715	22.62393601969792	23.70345307335184	23.42893147135061	22.693333308830148
NUP205	26.092084496410486	26.75217930460173	23.975784214329412	24.756425680465888	24.469112086382108	28.62181048251384
RPLP2	1075.6204077777645	1136.0219445434273	1254.5573526376636	1228.356101574094	1096.5585399594493	1190.5116157484488
GRSF1	10.520844364184955	11.290976774651964	11.437960546779285	10.91629085863127	10.796265269296029	12.148703508618876
POLR2A	76.57226249661443	77.51909431948494	78.72505080794168	80.04192676697926	80.61651161013376	77.47535526129165
POM121	9.37791420277611	9.078939156731707	9.23398042093627	9.846776296577275	9.611049032323281	8.918651590649414
NUP35	4.783533195256374	5.848235788163744	5.291402458136588	4.393701730474834	5.365911030336483	6.557983913463696
NUP210	18.364768891394753	18.1010368707679	17.44915446479192	19.346334853955412	19.686876104004845	16.415557040417482
POLR2B	25.326418587556965	27.89239771593259	25.183675350681362	24.67002757983149	25.30737022307241	31.072489083930762
RPL36AL	135.2110467232195	166.05483357836212	157.09855122702098	158.5931165608964	152.24086818738462	163.2770229410896
RPS29	26.768594527443266	28.98488713751053	28.817239482081572	29.12829720883385	30.82050111055507	27.78417325343731
NUP42	7.319655374717926	9.07361204477337	9.821769947417858	8.890472823341371	9.008109567861716	9.658912709781896
POLR2L	229.80595537874214	225.0658194786528	234.4257951632776	255.6870114034997	262.66314916360113	209.9404350082357
NUP50	15.651328793547261	17.704508578095286	15.828286663576387	16.89361555760866	16.342795542346927	19.13309400423584
NUP153	14.672706265504848	14.120891121041986	13.414507954839172	14.493454245026596	14.70719681121856	16.476757760373733
DNAJC3	4.845343808625592	4.880664761624387	4.147336126094612	4.468479083789483	4.971278117527684	6.453748411769363
SEH1L	9.849405801266439	10.842821978794714	11.04038866628888	11.3460923553673	11.165752708066654	14.48505066695425
RPL3L	1e-08	1e-08	1e-08	1e-08	1e-08	0.039289224011671404
TPR	5.3527395820385655	9.303993418276534	6.897146281080477	10.539502539667424	10.310631674761275	25.15118036344993
RANBP2	2.248632269066708	3.3250215005232757	2.5144555469540557	4.254693627612012	4.293460852873582	9.785811961426099
RPS10	1.6019223737077155	2.413810877598034	2.0758276614799724	2.820044451592118	3.421825614731747	2.84474890121886
