# Supplementary material for: Peptide-based Self-adaptive Implant Coating Sequentially Regulates Bone Regeneration to Enhance Interfacial Osseointegration
Source: Research Square preprint supplement (doi:10.21203/rs.3.rs-5132912/v1), 2024-10-01
Supplement: Supplementary file 897 [file 1190_HATs acetylate histones(R-HSA-3214847).heatmap-data.xls]

id	S1	S2	S3	C1	C2	C3
H2BC9	9.757294341978419	10.49380764543431	12.555768390944927	4.235528139180963	3.5333136670162397	4.301658694745401
H2AC20	2.0670439766756346	1.0568973595171147	2.509068226891828	1.1883485903734443	0.5507391832596165	0.412616289944436
TADA2A	5.569838667954227	5.872276670258841	5.398737946441382	4.0374640335167005	4.258456072357857	4.232294967643457
RUVBL2	87.5320438024513	80.35906957869692	85.92989325296384	71.2298530639085	72.01488800644688	52.888654885645295
TAF12	10.765192228305558	12.068212932437197	13.566766913055089	9.208536460266378	9.623853460984105	9.725338759906046
H4C2	1e-08	0.4485457923552017	1e-08	1e-08	1e-08	1e-08
MRGBP	31.828542033666288	31.059746433277986	32.01388700680071	24.860141479483328	25.694842385678054	25.54386394010307
MEAF6	13.868474439323997	14.075649405021105	15.307521907296762	11.38235529975828	11.51985696275709	11.85109905601399
H3C7	0.3024942490257026	0.0503284552151007	0.0501813743378365	0.0495145341822268	0.050067207569056	0.0515770449930545
H2AC14	0.3139331068039855	0.7312427140076397	0.1041579679113078	0.2055476986220173	0.1558814948683635	0.2141097182904951
ELP4	3.2957819160059896	3.6021681401361785	3.920268978669336	2.614174033442548	3.0147571929515617	3.0996926815358954
H3C2	0.0974769532998676	0.3892329170255929	0.4366073404227424	0.2872036297184352	0.0484015669454279	0.1495835048330856
ACTL6A	43.85281143740594	55.56752523662471	54.766495234032114	41.11418471159103	41.078951060262945	45.74709454398153
RUVBL1	30.66537614658104	32.258362243655185	35.53571217540885	29.38445223694441	26.970890357745294	25.66988105515617
ELP2	9.691351604648316	10.06939936844344	10.606049782905027	8.471890903556037	8.549251114272286	8.82183125388332
MORF4L2	142.95978875246178	160.83635118833686	154.6398481889884	121.61936024059113	122.32532353287077	146.7046314117945
ELP3	11.818380267687745	12.87509476270594	12.685073277591902	10.361204092813537	10.947480029279827	10.755502856379504
PHF20	13.905985105842861	15.507903474279837	14.332036056165636	11.75172935065319	12.427304782127905	13.528309174824324
ACTB	4407.849949629919	4078.6853602884253	4191.890244775874	3757.026175948939	3880.6547691106707	3316.945535142073
H4C1	1e-08	0.2473856014055696	1e-08	1e-08	1e-08	0.0633807445437037
ELP1	11.972606387743415	14.34809478313817	12.577623373428068	11.438801233499161	11.218241258944287	11.287486285964075
H2AC15	0.20084967946061438	0.6516316131680984	0.2998741307607814	0.1479446165283471	0.2493265785394524	0.4109525146220794
EP400	8.477428340365774	8.197725198845676	7.675515113336419	7.5874511365545185	7.2374132555376995	7.0762483372080505
TAF10	9.489541923130114	10.072207496225714	10.476776834471178	8.615396720091027	9.079392219765001	9.35319236858611
WDR5	19.492415839615823	17.820174510703122	17.536363876840817	17.103258584080866	16.490723787581523	16.386623087503548
TADA3	38.59274647813928	33.83082684564112	34.888159839150624	36.052032162989136	32.52584627732758	29.90838878245974
YEATS4	11.451714815077267	12.939210145764612	14.860247084212748	11.646908925032717	11.490490063539191	13.416423536238268
RBBP7	42.0600876379597	45.991883637090844	43.68803587875443	38.90930131040235	39.632823437021855	44.76855509292646
KANSL2	14.032222934794072	14.406066766155565	14.18637532764279	13.214472947546447	13.445352864132596	13.80786562252745
MBIP	7.7678122264694895	8.810409676732824	7.160101184670049	6.857160704818732	7.969251747335781	8.085889521453607
TADA1	6.4877509742945785	7.389877374642093	8.267140369752385	6.908599040555285	6.891310234180528	7.609679690053505
H2BU1	0.6007871791760483	0.2726124215817955	1.3047154827837508	0.6973295588996948	0.5423946503314404	0.78225170739466
VPS72	39.989336896827524	37.49297852402562	37.98842084698045	36.96518411275222	39.80821335064153	35.330302106147926
H2AC21	0.2505569417214908	1e-08	1e-08	1e-08	0.1990599343389431	1e-08
KAT14	3.607592842195764	3.836730959690261	3.948732968694869	3.8094189720073848	3.606070658296811	3.8716103044324846
H3C4	0.21241245360866678	0.1855392035541772	0.8192723058098392	0.0782308467143498	0.5273602573158568	0.5704266208933342
BRPF1	6.690330687767324	6.7082375852114176	7.100241496698844	7.117093807300163	7.020531514314537	6.2400770015119384
TADA2B	3.824588962654039	3.9361444664535545	3.5303644912929237	3.836714836999125	3.7981507052935086	3.6378687812633137
H2BC10	1e-08	1e-08	0.257153474552814	0.2029890137014112	1e-08	0.0528611205530475
H4C3	0.4919577189010604	0.0613882863858265	0.428462128222812	0.3623729721632602	0.1832088662897309	0.4403787433481048
H3C13	0.21241245360866678	1e-08	1e-08	0.0521539011428999	1e-08	0.1629790416838097
H2BC14	1e-08	1e-08	0.10593844582432159	1e-08	0.0528487185451147	0.0544424358260019
H2AC7	0.0488340472806199	1e-08	1e-08	1e-08	1e-08	0.0499589419344488
H4C4	1e-08	0.061692942844317	0.5536137714045196	1e-08	0.1227453975886535	0.5057877079964055
TRRAP	15.911757157268672	14.630147946681651	14.01973655037138	15.157686325699402	15.377477066074695	14.20314980934327
ELP5	13.41639219460735	12.780102959025784	15.037390290213631	14.290087042196852	13.63328271315333	13.802765923968296
DMAP1	17.713972350557377	17.86885157383307	16.76357160118594	18.21173761332263	19.40888541986705	15.4307711508325
H2BC6	0.26495063779910827	0.5818825021252282	0.10548764396975	0.7286009658388956	0.2104952916945845	0.1084215218577401
SUPT3H	0.7945526832021821	0.9499411248241538	0.8468494938875898	0.8494075532977041	0.7052661747403958	1.1125806285740616
DR1	7.257092966212242	7.119287679223333	6.86096823797919	6.627248121115471	6.664575039077651	8.559291498504633
YEATS2	18.11206937754153	17.75442643667825	16.90763676656269	18.02990572044748	17.980173187383013	18.615464567904503
H4C11	0.2560962466387268	0.1278264981041632	0.1274529353619088	0.6287962811059142	1e-08	1e-08
HAT1	9.351860605590185	12.358598988817567	9.66128868011165	8.716613112117303	10.04335131512434	14.098212398437553
SAP130	12.486244690430217	11.883843702803405	11.804568573281555	12.697094417064777	12.366597809556842	12.682297070879768
H4C15	0.4210147190872383	0.0373587657269117	0.1489983209414952	0.2848480277785957	0.1858241692720787	0.2201421105225714
KAT7	6.386123280567553	5.572977819112377	6.047445740193124	6.579420693081546	5.704671289904508	6.800108197931037
SUPT20H	8.804924913626932	9.459375325816001	8.1866869117573	8.530863494260084	9.02858796579318	10.773551165123282
JADE3	8.604759099552675	8.340595054989487	8.296336957552741	8.676568985237516	8.8031726966707	9.569334389736035
KAT5	16.000709089763667	15.89867200853945	17.419428502890277	18.588061192814905	19.091364575398728	15.1720645420278
TAF9	26.533282564920174	31.287957931288574	28.06755683360416	29.53230740162603	27.87362390081181	34.87816584931524
ENY2	16.39753041849773	18.588839875476523	17.184375570011834	17.824477719716107	17.40105213609136	20.964669078955538
KAT8	6.374928317822271	6.536150153366207	6.202169405257631	7.720301571099482	6.340380406077641	6.619846937803704
KAT6A	3.3311498652356124	3.4279290798722077	3.2353305023168506	3.699172102396239	3.431995039121833	3.8132260000550953
BRD8	17.43646136912835	18.174603764928513	18.936120767333698	19.5415238896169	20.270993399828534	20.11708653441177
SUPT7L	4.971582048393006	5.63137375508847	5.58343100021937	5.825084009634329	5.863924453481651	6.20795780738375
USP22	67.20860713842247	64.92542980110802	66.52516279394693	85.36962537578923	65.79742316406502	69.70776021046518
ELP6	6.590653628557554	6.22443331840509	6.039462764241603	7.230836640321934	6.383736121820168	7.381394008412729
H2BC7	0.1053080819370663	0.3679403134964445	0.6289114852530554	0.8791183484404674	0.3660303888452342	0.3232015569755043
MORF4L1	70.50757964876483	74.23158079111839	78.55771743170112	79.80007280328095	82.55839740165374	86.75358335716652
H2AC16	0.3100252259309069	0.412651494419249	1e-08	0.5074725192535283	0.20525474526235418	0.3171666733182853
H4-16	0.3626994131036337	0.7241432702794103	0.1203378448684042	0.7718016466462642	0.8404484041446397	0.24736947880164
KANSL1	4.217676878820448	4.096088588631743	4.21858403706001	4.655011698724972	4.604644773096919	5.176860558250192
H4C14	1e-08	0.1883504034565132	0.2503999492211238	0.4941449584044457	0.0624575746442264	0.2573642048138275
TAF5L	5.613655363671268	5.1125488732594695	5.573662576380373	6.312192619422896	5.970081706337786	6.932274513957147
ING3	1.8578812934925732	2.7306301160920343	2.879000268126128	2.622632947883404	2.54432395919112	3.9897607334296703
MSL2	3.0207305193915452	3.4742922198480737	2.6864750499174224	3.6848242176037607	3.335931776765208	3.8639600803000014
MSL3	2.732042422953957	2.84283528190364	2.7994713304921652	3.286063916889564	3.3477254749305385	3.464122072194118
MCRS1	23.29758310631331	21.7532086671822	21.085748850502313	28.690802047779933	28.227776229694904	22.84115066884864
H2AC17	1.176228464418218	1.0720889025286544	0.5599292375396384	0.8538459526742117	1.9299002826207798	1.2556413382908707
MSL1	14.94757331096037	15.783070880472504	14.409629268296554	17.453822132461912	18.41465395124737	18.822847152588626
H3C1	0.588315577238965	0.0489414508194089	0.2927904901128889	0.7703992208982697	0.4381865462047699	0.4012449751428177
HCFC1	13.206637629524437	13.721945604434692	13.697397751879897	17.505535650548083	17.23280167024202	14.66451117775859
H3C11	1e-08	1e-08	0.0493816713205005	0.1949018023985662	0.049269323942457505	1e-08
H2BC18	0.2340729330556032	0.1168339006779123	1e-08	0.2758666447295496	0.06973646375689939	0.526822581714771
TAF6L	7.041824969903204	5.76452214035403	6.778747391162301	8.918223087663954	7.824882688480655	7.801551451728183
H4C5	0.7858487167245398	1e-08	0.601689184342021	1.5436032832925282	0.4202242070723198	1.1131626196073798
JADE2	12.415787656991128	11.473597826531401	11.717139099677935	15.4086585606978	16.163506371769287	13.312514757089605
H4C13	1e-08	1e-08	1e-08	1e-08	1e-08	0.0658373621616768
H2AC4	1e-08	1e-08	1e-08	1e-08	0.09386412992073499	1e-08
KANSL3	11.171381068181002	11.46364085327001	10.651508982689005	14.782832029055292	14.140361721082323	13.246112614498157
BRD1	2.795288206997773	2.735956386630201	2.9996326883016335	4.06899290971961	3.4657504930138887	3.285259500506128
CREBBP	6.002527795994773	6.323460720774111	5.794236162760662	8.129802151010177	7.910459202141568	7.653098678401292
KAT2A	10.002786993509039	11.390502861426347	11.035077657869094	14.273979405818903	14.687437106481832	13.590369481379312
ZZZ3	3.432351987345647	4.137615791398663	3.3965156940614283	4.410744028470934	4.354179745868563	7.342981322370352
JADE1	3.0865734059448324	3.370872290717787	2.984212755083437	3.9541190487608158	3.7704882773008097	4.9244995450275235
NCOA1	1.6698631397598254	1.5467736991642516	1.2174024625949142	1.9667723466265492	1.6929337545703766	2.301543172018312
ING5	3.033138332570188	2.710615418992995	2.874620950867916	3.9537993262236975	3.892722306069122	3.755651399568232
H3C12	1e-08	1e-08	0.0484171857478344	0.1910951267657817	1e-08	0.1492913495697397
EP300	12.692399625523615	12.31926142049435	11.554735011479789	16.577974828181958	15.878379141632841	17.46587934871418
ATF2	7.91668852058225	8.27501631285516	7.265184565481813	9.971259869354482	9.543270222997048	15.446473031100787
ATXN7L3	17.83340378249022	17.75145377587274	17.669016144507868	25.038132654559682	25.414158874016344	23.23844801022179
ATXN7	3.478702998983789	3.567563956584531	3.1377237109256852	4.297099819242298	4.323039159368045	5.503553740644198
SGF29	2.8652183035443395	2.6255711584309704	3.334529466105728	4.199357478608754	4.3921486090166475	3.953387349449927
OGT	31.87119283852371	33.71510986061826	31.207667142148892	41.871121905306346	42.42086799598271	53.89057249413509
CLOCK	0.623043882612518	0.6751599128115304	0.5569090914128798	0.9480532028551226	0.8812931053272074	1.920573960172575
H4C12	0.5148394728034353	0.4497048253845433	0.2562232036216151	1.2008871520526645	0.4473704730330639	0.9875602924251521
H2BC13	0.276112637639869	0.4410155654103725	0.10993169063366409	0.5965896428297577	0.6032486831491142	0.3954620654456374
NCOA2	1.5995892370582854	1.5206519966917447	1.3846586596270025	1.9095502943684355	1.982281948437636	2.8533085154765896
H2AW	12.550347591119332	12.626124032531912	13.609973177077556	17.74561712770083	20.4655069567176	18.43484589381164
H4C9	0.31366951898131207	0.06262532973868949	0.5619807300151672	0.8009629175522943	0.6853026588419409	0.6417898157070258
EPC1	3.57742561387508	3.7429761751297184	3.832767385249949	5.203129463165992	5.075279887103784	6.600120995448066
BRPF3	7.228602102508348	7.595694545128943	7.706871019949328	11.748139874287375	11.055670109123959	11.440936861086932
ING4	10.722266750361289	9.774043469530108	9.620216371223089	14.189126254583647	16.94705065800311	15.475403978901387
KAT2B	3.5451721921155066	3.7327407197395663	3.314675137213298	5.227853783470281	4.92164032188933	6.325501417215151
H2AC18	0.1869070194792959	0.18658351421208058	0.232547795955828	0.688372663265105	1.392112332651802	0.3824248548265504
H2BC17	0.5333053421866422	0.6920969589751108	0.3715785065315607	0.8904132307330644	1.5358943833924983	1.0366211030295707
H2BC15	0.6892627133150235	0.9632975942462264	0.503109850981188	2.391862135717829	1.8709613007078607	1.1752331874247655
H2AC11	2.3743445812301434	1.4624854180152793	2.061609245899679	4.316501471062364	2.909787727542786	5.426573651155652
H2AC19	0.09327850817646509	0.1862341069008221	0.1392673919263554	0.824500289079328	0.2779010841473447	0.7634173968634883
H4C8	0.5480396948851972	0.5470911284018039	1.2728153489748568	3.1696559321004	3.930703467071856	1.8688793708730256
KAT6B	2.0368282568665492	2.304779242419845	1.726294855605241	4.164361828107928	3.910462913079924	4.851666359275352
H2BC8	1.018624100515999	0.5592735709383584	1.2166671993443565	2.501040393028636	3.995751446257629	4.585187873431626
H3C8	0.502124183651536	0.5012550893600757	0.09995805025359379	1.4301312064406888	1.246632852697262	1.386964713099518
H3C10	1.5886134449930076	1.2789224347047194	1.2241774906366056	3.6237296316326018	2.595458807437856	3.2504144704264886
H2AC8	2.0714321909748468	1.442683874773293	1.006927425165796	3.5956930388153285	4.640464174630614	4.928250548988187
H2BC11	1.4528126190984438	1.81287254701894	1.3944146715376335	5.605456768462932	5.668024001463553	3.5033701119032266
H2BC21	3.516314187211548	3.44315360548921	4.023850472150965	9.447522617298217	9.57521647170723	10.562809800564995
H2BC4	0.6364931092634805	1.3015276257893604	0.5517881695532268	3.428054206886571	3.77216916567686	4.127480936472212
H3C6	0.4243135339271646	0.1104989074944877	0.2019892943050399	1.277364701625492	1.3099433324715763	1.3777563329033564
H2AC13	0.4528247193293851	0.5022677258840353	0.3505599249095734	1.3341913706920034	1.9486760268998655	2.05891356851062
H2AC6	12.284724301633418	11.880228295534526	11.702216822732868	42.88778267065175	40.7930933295401	45.8524810074092
H2BC12	29.790964962554984	26.544027725488142	25.544181408379497	101.56349981404948	102.94809262773136	102.54817066732927
H2BC5	2.9810960130851183	4.143708666043292	4.563538902304981	15.713809369261375	15.083501871580692	15.750688732606244
