# Supplementary material for: Peptide-based Self-adaptive Implant Coating Sequentially Regulates Bone Regeneration to Enhance Interfacial Osseointegration
Source: Research Square preprint supplement (doi:10.21203/rs.3.rs-5132912/v1), 2024-10-01
Supplement: Supplementary file 901 [file 1191_Pre-NOTCH Transcription and Translation(R-HSA-1912408).heatmap-data.xls]

id	S1	S2	S3	C1	C2	C3
H2BC9	9.757294341978419	10.49380764543431	12.555768390944927	4.235528139180963	3.5333136670162397	4.301658694745401
NOTCH1	3.0923460078660137	3.2922735471280418	3.010609145464009	2.1985525239608332	1.9852732353469176	1.7708582630903358
H2AC20	2.0670439766756346	1.0568973595171147	2.509068226891828	1.1883485903734443	0.5507391832596165	0.412616289944436
H3-3B	175.77382955506508	185.9475855635937	188.4559004403793	126.56897181016372	124.616903085904	125.79400494609169
SIRT6	8.831036161647626	9.444511941529653	8.515708796535884	7.165362112206088	6.919561054852141	5.946902798171777
NOTCH3	1.0731111011181396	0.9165807265441382	0.8453594361446791	0.7805839339686127	0.6753188299297169	0.6868777677254756
H4C2	1e-08	0.4485457923552017	1e-08	1e-08	1e-08	1e-08
H2AX	74.27804309685656	68.57421373620386	71.53479571188596	58.63067060925413	57.63828874914055	54.35105010622366
H3C7	0.3024942490257026	0.0503284552151007	0.0501813743378365	0.0495145341822268	0.050067207569056	0.0515770449930545
H2AC14	0.3139331068039855	0.7312427140076397	0.1041579679113078	0.2055476986220173	0.1558814948683635	0.2141097182904951
TP53	10.303805580047344	11.138647899132977	10.80181948196742	9.536819122527676	8.446788109913912	8.370375573457661
H3C2	0.0974769532998676	0.3892329170255929	0.4366073404227424	0.2872036297184352	0.0484015669454279	0.1495835048330856
CCND1	113.0731507347212	112.6486459939688	114.34916772390781	96.82489262312707	97.14694997291795	97.89416169740011
H4C1	1e-08	0.2473856014055696	1e-08	1e-08	1e-08	0.0633807445437037
H2AJ	118.82266446289947	116.77238329772321	112.47278690334376	108.49271146412121	105.87403407459307	89.95750327177318
SNW1	36.732304068276385	43.21912515044248	41.92572346861556	34.95734374227041	35.07881477325177	39.11248370251028
H2AZ2	39.65215992772788	40.748211345910896	39.86667197365289	35.13160143877897	36.26104939387408	38.52802887945367
JUN	31.603883584212213	29.930884210821148	31.78426297363337	29.02627454680305	32.06126860670186	25.197432333622505
E2F1	16.637520510583563	17.449788729575616	16.062551055419874	17.076657463020695	17.046596530727424	13.970857462672551
H2BU1	0.6007871791760483	0.2726124215817955	1.3047154827837508	0.6973295588996948	0.5423946503314404	0.78225170739466
H3C4	0.21241245360866678	0.1855392035541772	0.8192723058098392	0.0782308467143498	0.5273602573158568	0.5704266208933342
H2AB1	0.1272846386871355	0.5082572897872522	0.08446199972024279	0.4583678539628973	0.2106745892088048	0.043405555632996404
H2BC10	1e-08	1e-08	0.257153474552814	0.2029890137014112	1e-08	0.0528611205530475
H4C3	0.4919577189010604	0.0613882863858265	0.428462128222812	0.3623729721632602	0.1832088662897309	0.4403787433481048
H3C13	0.21241245360866678	1e-08	1e-08	0.0521539011428999	1e-08	0.1629790416838097
H2BC14	1e-08	1e-08	0.10593844582432159	1e-08	0.0528487185451147	0.0544424358260019
H2AC7	0.0488340472806199	1e-08	1e-08	1e-08	1e-08	0.0499589419344488
H4C4	1e-08	0.061692942844317	0.5536137714045196	1e-08	0.1227453975886535	0.5057877079964055
AGO1	4.015041451588544	4.326110018917572	3.6226039613371896	3.794700582231638	4.126912381297016	4.265930161238458
H2BC6	0.26495063779910827	0.5818825021252282	0.10548764396975	0.7286009658388956	0.2104952916945845	0.1084215218577401
NOTCH2	23.738712877898934	23.64698912249145	22.151597484528605	23.459682396279604	23.874753908499503	24.006614983419446
H4C11	0.2560962466387268	0.1278264981041632	0.1274529353619088	0.6287962811059142	1e-08	1e-08
H4C15	0.4210147190872383	0.0373587657269117	0.1489983209414952	0.2848480277785957	0.1858241692720787	0.2201421105225714
MAMLD1	4.370513020774672	4.859163540378011	4.476223062079217	4.752946826850444	4.8385973038202055	4.850183571423684
RUNX1	4.533212286510183	4.688933489206883	4.566504164743128	4.638511948632383	4.616063870083889	5.2904917529059885
MOV10	24.880299728435745	23.908073238917304	25.90845736943688	27.26586988298916	27.95416372939498	23.706471890115083
NOTCH4	0.0701559508820174	0.033174252761503	0.0477783230878556	0.021758505133598203	0.1210074903218312	0.0453296858248817
TFDP2	4.113200618863115	4.482354549397568	4.169116364670892	4.68287875486801	4.774919818720301	4.422442920599127
TFDP1	33.17983685313176	32.74620288920528	34.004147019426505	37.10866015836992	37.61235634378373	34.58949381515459
H3-3A	108.28489539745624	123.02815419592875	124.57934028058891	130.30125367686827	132.2529721881025	129.03467946396432
H2BC7	0.1053080819370663	0.3679403134964445	0.6289114852530554	0.8791183484404674	0.3660303888452342	0.3232015569755043
H4-16	0.3626994131036337	0.7241432702794103	0.1203378448684042	0.7718016466462642	0.8404484041446397	0.24736947880164
MAML1	7.136243276284335	6.669727303965298	6.749428434360618	8.166157929522008	8.072281663433763	7.469068930993152
H4C14	1e-08	0.1883504034565132	0.2503999492211238	0.4941449584044457	0.0624575746442264	0.2573642048138275
PRKCI	8.943913467748908	10.032404515484803	9.287854845824413	10.22051919145549	9.059222461895539	13.628453154892814
ELF3	24.012128847540286	23.505992874390245	24.550514123255184	29.244579277890768	31.45692750495471	26.10873659057093
H3C1	0.588315577238965	0.0489414508194089	0.2927904901128889	0.7703992208982697	0.4381865462047699	0.4012449751428177
H3C11	1e-08	1e-08	0.0493816713205005	0.1949018023985662	0.049269323942457505	1e-08
AGO4	3.5384828302328377	3.55045748742996	3.3235260171699643	4.261685428889203	3.985159407673255	4.6246865798504135
E2F3	4.957386521512676	4.49516554309573	4.4710635714393065	5.35565039074972	5.749107291802162	6.421184019520133
H4C5	0.7858487167245398	1e-08	0.601689184342021	1.5436032832925282	0.4202242070723198	1.1131626196073798
H4C13	1e-08	1e-08	1e-08	1e-08	1e-08	0.0658373621616768
H2AC4	1e-08	1e-08	1e-08	1e-08	0.09386412992073499	1e-08
CREBBP	6.002527795994773	6.323460720774111	5.794236162760662	8.129802151010177	7.910459202141568	7.653098678401292
KAT2A	10.002786993509039	11.390502861426347	11.035077657869094	14.273979405818903	14.687437106481832	13.590369481379312
H3C12	1e-08	1e-08	0.0484171857478344	0.1910951267657817	1e-08	0.1492913495697397
EP300	12.692399625523615	12.31926142049435	11.554735011479789	16.577974828181958	15.878379141632841	17.46587934871418
MAML3	0.7387182858127682	0.8464209189930628	0.8185926809721545	1.2079981297771452	1.058858325391629	1.0721753347416496
AGO2	5.509098756063461	5.148330792276103	4.880504810816714	6.769449882203014	7.036790536552233	7.998656114886553
AGO3	0.6468115701234404	0.6901000262352669	0.6331782937769176	0.8309801255169178	0.852625086024174	1.117718007067361
H4C12	0.5148394728034353	0.4497048253845433	0.2562232036216151	1.2008871520526645	0.4473704730330639	0.9875602924251521
H2BC13	0.276112637639869	0.4410155654103725	0.10993169063366409	0.5965896428297577	0.6032486831491142	0.3954620654456374
TNRC6B	1.856101292056844	1.9447344611658364	1.5276166003366443	2.6348577030823623	2.3928089000095523	2.6832263591102405
TNRC6A	4.36863591480181	4.69125051368779	4.024605407620792	5.898486199395497	5.512688803339414	8.408426621835828
RBPJ	4.820620088599472	5.302676987465363	4.5484525458135945	6.254751713239413	6.942281959062987	9.646391311910868
H4C9	0.31366951898131207	0.06262532973868949	0.5619807300151672	0.8009629175522943	0.6853026588419409	0.6417898157070258
TNRC6C	0.6317980368972874	0.5786416279971905	0.5769505939023993	0.9146589391170601	0.8301617146250314	1.0000155818552836
KAT2B	3.5451721921155066	3.7327407197395663	3.314675137213298	5.227853783470281	4.92164032188933	6.325501417215151
H2AC18	0.1869070194792959	0.18658351421208058	0.232547795955828	0.688372663265105	1.392112332651802	0.3824248548265504
LOC102724334	1e-08	1e-08	1e-08	0.056359860106037	0.056988939951874804	1e-08
H2BC17	0.5333053421866422	0.6920969589751108	0.3715785065315607	0.8904132307330644	1.5358943833924983	1.0366211030295707
H2BC15	0.6892627133150235	0.9632975942462264	0.503109850981188	2.391862135717829	1.8709613007078607	1.1752331874247655
H2AC19	0.09327850817646509	0.1862341069008221	0.1392673919263554	0.824500289079328	0.2779010841473447	0.7634173968634883
H4C8	0.5480396948851972	0.5470911284018039	1.2728153489748568	3.1696559321004	3.930703467071856	1.8688793708730256
MAML2	0.2206480661639501	0.3779303527781721	0.2542996778278503	0.547462659169525	0.5235881290896957	0.7365949124374118
H2BC8	1.018624100515999	0.5592735709383584	1.2166671993443565	2.501040393028636	3.995751446257629	4.585187873431626
H3C8	0.502124183651536	0.5012550893600757	0.09995805025359379	1.4301312064406888	1.246632852697262	1.386964713099518
H3C10	1.5886134449930076	1.2789224347047194	1.2241774906366056	3.6237296316326018	2.595458807437856	3.2504144704264886
H2AC8	2.0714321909748468	1.442683874773293	1.006927425165796	3.5956930388153285	4.640464174630614	4.928250548988187
H2BC11	1.4528126190984438	1.81287254701894	1.3944146715376335	5.605456768462932	5.668024001463553	3.5033701119032266
H2BC21	3.516314187211548	3.44315360548921	4.023850472150965	9.447522617298217	9.57521647170723	10.562809800564995
H2BC4	0.6364931092634805	1.3015276257893604	0.5517881695532268	3.428054206886571	3.77216916567686	4.127480936472212
H3C6	0.4243135339271646	0.1104989074944877	0.2019892943050399	1.277364701625492	1.3099433324715763	1.3777563329033564
H2AC6	12.284724301633418	11.880228295534526	11.702216822732868	42.88778267065175	40.7930933295401	45.8524810074092
H2BC12	29.790964962554984	26.544027725488142	25.544181408379497	101.56349981404948	102.94809262773136	102.54817066732927
H2BC5	2.9810960130851183	4.143708666043292	4.563538902304981	15.713809369261375	15.083501871580692	15.750688732606244
