# Supplementary material for: Peptide-based Self-adaptive Implant Coating Sequentially Regulates Bone Regeneration to Enhance Interfacial Osseointegration
Source: Research Square preprint supplement (doi:10.21203/rs.3.rs-5132912/v1), 2024-10-01
Supplement: Supplementary file 905 [file 1192_HDACs deacetylate histones(R-HSA-3214815).heatmap-data.xls]

id	S1	S2	S3	C1	C2	C3
H2BC9	9.757294341978419	10.49380764543431	12.555768390944927	4.235528139180963	3.5333136670162397	4.301658694745401
H2AC20	2.0670439766756346	1.0568973595171147	2.509068226891828	1.1883485903734443	0.5507391832596165	0.412616289944436
HMG20B	61.519687586593726	57.67139664188776	59.670317490079405	47.9386706399925	48.75736505631775	37.27513966001149
TBL1X	6.72172082190458	5.621525362031284	5.596997050410999	4.879247454713363	4.6104519261229715	4.545520083996612
SAP30	10.874810372153739	11.513239739826759	11.705569456798244	9.097312113898074	9.987972344008533	7.594941740818631
KDM1A	39.394224269150364	39.429122023451576	37.83641062394909	32.38960715541656	30.61045406062632	28.58223124492015
H4C2	1e-08	0.4485457923552017	1e-08	1e-08	1e-08	1e-08
H3C7	0.3024942490257026	0.0503284552151007	0.0501813743378365	0.0495145341822268	0.050067207569056	0.0515770449930545
H2AC14	0.3139331068039855	0.7312427140076397	0.1041579679113078	0.2055476986220173	0.1558814948683635	0.2141097182904951
H3C2	0.0974769532998676	0.3892329170255929	0.4366073404227424	0.2872036297184352	0.0484015669454279	0.1495835048330856
H4C1	1e-08	0.2473856014055696	1e-08	1e-08	1e-08	0.0633807445437037
HDAC2	10.063747567439284	11.931407083490624	11.620276353621964	8.761853722007187	8.867035208368817	11.99417021505051
H2AC15	0.20084967946061438	0.6516316131680984	0.2998741307607814	0.1479446165283471	0.2493265785394524	0.4109525146220794
SAP18	36.09173709760442	43.11685264403061	43.02502782932351	36.74506806058788	40.01133642731835	31.66218350123784
CHD4	63.59296055472143	60.644769925292046	61.8748265912966	57.409912160228004	58.02788199253594	50.601403809125884
HDAC10	12.855317770957905	11.990443288959709	11.182839835550482	10.614972697910536	11.273018650811457	10.392119560073105
SUDS3	6.837660035283692	6.324707862467362	6.427352366535254	6.073025580656378	5.476123634784675	6.049768061704791
RBBP7	42.0600876379597	45.991883637090844	43.68803587875443	38.90930131040235	39.632823437021855	44.76855509292646
HDAC3	46.04049036641004	44.826236607670616	45.02155748923955	43.4680599184604	45.11447745866853	41.645230787739905
BRMS1	34.483022930296634	32.48713279507821	32.88764192389778	35.92324798378964	34.07419573889611	25.812688687640463
H2BU1	0.6007871791760483	0.2726124215817955	1.3047154827837508	0.6973295588996948	0.5423946503314404	0.78225170739466
GPS2	51.39907001410968	46.84927746812211	53.92158284013253	51.41628612102176	51.233048036735475	44.99999816493507
H2AC21	0.2505569417214908	1e-08	1e-08	1e-08	0.1990599343389431	1e-08
HDAC1	88.19942615121153	91.37697713838847	92.53724488176043	88.17790377382121	94.07712505372992	83.76201223157923
H3C4	0.21241245360866678	0.1855392035541772	0.8192723058098392	0.0782308467143498	0.5273602573158568	0.5704266208933342
H2BC10	1e-08	1e-08	0.257153474552814	0.2029890137014112	1e-08	0.0528611205530475
H4C3	0.4919577189010604	0.0613882863858265	0.428462128222812	0.3623729721632602	0.1832088662897309	0.4403787433481048
H3C13	0.21241245360866678	1e-08	1e-08	0.0521539011428999	1e-08	0.1629790416838097
MTA1	23.58130434799006	24.081210200458973	22.99245734650416	24.55152446702233	24.869032579671202	21.370613604929733
H2BC14	1e-08	1e-08	0.10593844582432159	1e-08	0.0528487185451147	0.0544424358260019
H2AC7	0.0488340472806199	1e-08	1e-08	1e-08	1e-08	0.0499589419344488
H4C4	1e-08	0.061692942844317	0.5536137714045196	1e-08	0.1227453975886535	0.5057877079964055
MTA2	33.37513680891166	29.878254451068422	30.8765586283762	33.051894515736564	33.09960426843332	28.480212518484322
H2BC6	0.26495063779910827	0.5818825021252282	0.10548764396975	0.7286009658388956	0.2104952916945845	0.1084215218577401
H4C11	0.2560962466387268	0.1278264981041632	0.1274529353619088	0.6287962811059142	1e-08	1e-08
HDAC8	5.869863828752415	6.057580777011683	6.300821073687383	6.034975137888391	5.8165872163640895	7.045171394758596
H4C15	0.4210147190872383	0.0373587657269117	0.1489983209414952	0.2848480277785957	0.1858241692720787	0.2201421105225714
GATAD2A	12.611356319134734	11.515148275215045	11.162184225842037	12.77891689315619	12.966086622554748	11.25383758740558
MTA3	8.188980758403241	8.333165273278569	8.466707763816933	8.503070026620705	9.151107341363504	9.134953589742265
NCOR2	21.66283305741961	22.33608186032621	21.551152850971175	25.77194500298668	26.04864534734909	20.518756112247416
PHF21A	13.066870237450372	13.399300795520524	12.577751523220241	13.936986766714663	14.300316390238777	15.20243165344422
H2BC7	0.1053080819370663	0.3679403134964445	0.6289114852530554	0.8791183484404674	0.3660303888452342	0.3232015569755043
H2AC16	0.3100252259309069	0.412651494419249	1e-08	0.5074725192535283	0.20525474526235418	0.3171666733182853
H4-16	0.3626994131036337	0.7241432702794103	0.1203378448684042	0.7718016466462642	0.8404484041446397	0.24736947880164
H4C14	1e-08	0.1883504034565132	0.2503999492211238	0.4941449584044457	0.0624575746442264	0.2573642048138275
H2AC17	1.176228464418218	1.0720889025286544	0.5599292375396384	0.8538459526742117	1.9299002826207798	1.2556413382908707
H3C1	0.588315577238965	0.0489414508194089	0.2927904901128889	0.7703992208982697	0.4381865462047699	0.4012449751428177
H3C11	1e-08	1e-08	0.0493816713205005	0.1949018023985662	0.049269323942457505	1e-08
H2BC18	0.2340729330556032	0.1168339006779123	1e-08	0.2758666447295496	0.06973646375689939	0.526822581714771
NCOR1	9.41821603643428	9.405701168950538	8.158743932788306	10.220300035038997	10.268457397021614	13.115931607411357
RBBP4	20.155819452524433	19.227641080303396	20.02787424416755	24.63225658880613	23.73578910316952	25.866362544015512
H4C5	0.7858487167245398	1e-08	0.601689184342021	1.5436032832925282	0.4202242070723198	1.1131626196073798
H4C13	1e-08	1e-08	1e-08	1e-08	1e-08	0.0658373621616768
H2AC4	1e-08	1e-08	1e-08	1e-08	0.09386412992073499	1e-08
SAP30L	3.165014106088815	3.067081372549101	3.358719453437814	3.95871223651028	4.102871260556287	4.074177160916195
TBL1XR1	7.4258469596693635	8.611108943364034	7.816808938921374	8.595642960554304	9.282091569971037	14.215457085386841
GATAD2B	8.446138906836216	7.917587293689723	8.12654978843809	10.281958277070935	10.017786311148793	10.958100514449695
CHD3	47.86431740556858	46.0584062757965	44.96731217213329	62.58414386918282	64.76887828632239	52.03513135219409
MBD3	16.509998482238345	14.677398476069511	13.495004413155497	21.711743886002306	21.58818553117073	15.333203939941178
H3C12	1e-08	1e-08	0.0484171857478344	0.1910951267657817	1e-08	0.1492913495697397
RCOR1	8.492333347631861	8.909946322055529	7.3924802187738665	11.066836248835717	10.717288035211492	12.19237701376242
ARID4A	0.9097263070707389	1.2535051880082086	0.9150628361208737	1.4503074891145014	1.3774242793782923	3.257386627987076
H4C12	0.5148394728034353	0.4497048253845433	0.2562232036216151	1.2008871520526645	0.4473704730330639	0.9875602924251521
H2BC13	0.276112637639869	0.4410155654103725	0.10993169063366409	0.5965896428297577	0.6032486831491142	0.3954620654456374
REST	3.3520574010764363	3.193875963567077	2.9323312423473973	4.0297223840440015	4.296020868536907	6.133962327090139
H2AW	12.550347591119332	12.626124032531912	13.609973177077556	17.74561712770083	20.4655069567176	18.43484589381164
ARID4B	1.446769380456264	2.438323139197139	2.2731874634506983	3.7701906724026286	3.303492164481068	7.252838433599584
H4C9	0.31366951898131207	0.06262532973868949	0.5619807300151672	0.8009629175522943	0.6853026588419409	0.6417898157070258
H2AC18	0.1869070194792959	0.18658351421208058	0.232547795955828	0.688372663265105	1.392112332651802	0.3824248548265504
H2BC17	0.5333053421866422	0.6920969589751108	0.3715785065315607	0.8904132307330644	1.5358943833924983	1.0366211030295707
H2BC15	0.6892627133150235	0.9632975942462264	0.503109850981188	2.391862135717829	1.8709613007078607	1.1752331874247655
H2AC11	2.3743445812301434	1.4624854180152793	2.061609245899679	4.316501471062364	2.909787727542786	5.426573651155652
H2AC19	0.09327850817646509	0.1862341069008221	0.1392673919263554	0.824500289079328	0.2779010841473447	0.7634173968634883
H4C8	0.5480396948851972	0.5470911284018039	1.2728153489748568	3.1696559321004	3.930703467071856	1.8688793708730256
H2BC8	1.018624100515999	0.5592735709383584	1.2166671993443565	2.501040393028636	3.995751446257629	4.585187873431626
H3C8	0.502124183651536	0.5012550893600757	0.09995805025359379	1.4301312064406888	1.246632852697262	1.386964713099518
H3C10	1.5886134449930076	1.2789224347047194	1.2241774906366056	3.6237296316326018	2.595458807437856	3.2504144704264886
H2AC8	2.0714321909748468	1.442683874773293	1.006927425165796	3.5956930388153285	4.640464174630614	4.928250548988187
H2BC11	1.4528126190984438	1.81287254701894	1.3944146715376335	5.605456768462932	5.668024001463553	3.5033701119032266
H2BC21	3.516314187211548	3.44315360548921	4.023850472150965	9.447522617298217	9.57521647170723	10.562809800564995
H2BC4	0.6364931092634805	1.3015276257893604	0.5517881695532268	3.428054206886571	3.77216916567686	4.127480936472212
H3C6	0.4243135339271646	0.1104989074944877	0.2019892943050399	1.277364701625492	1.3099433324715763	1.3777563329033564
H2AC13	0.4528247193293851	0.5022677258840353	0.3505599249095734	1.3341913706920034	1.9486760268998655	2.05891356851062
H2AC6	12.284724301633418	11.880228295534526	11.702216822732868	42.88778267065175	40.7930933295401	45.8524810074092
H2BC12	29.790964962554984	26.544027725488142	25.544181408379497	101.56349981404948	102.94809262773136	102.54817066732927
H2BC5	2.9810960130851183	4.143708666043292	4.563538902304981	15.713809369261375	15.083501871580692	15.750688732606244
