# Supplementary material for: Peptide-based Self-adaptive Implant Coating Sequentially Regulates Bone Regeneration to Enhance Interfacial Osseointegration
Source: Research Square preprint supplement (doi:10.21203/rs.3.rs-5132912/v1), 2024-10-01
Supplement: Supplementary file 917 [file 1195_RUNX1 regulates genes involved in megakaryocyte different...(R-HSA-8936459).heatmap-data.xls]

id	S1	S2	S3	C1	C2	C3
H2BC9	9.757294341978419	10.49380764543431	12.555768390944927	4.235528139180963	3.5333136670162397	4.301658694745401
NR4A3	0.10053667639481749	0.09690188280279409	0.1035200294163053	0.0340481377088252	0.030985360834078903	0.060292874681468704
H2AC20	2.0670439766756346	1.0568973595171147	2.509068226891828	1.1883485903734443	0.5507391832596165	0.412616289944436
H3-3B	175.77382955506508	185.9475855635937	188.4559004403793	126.56897181016372	124.616903085904	125.79400494609169
ZFPM1	1.0533758753121907	0.9375288742902679	0.8716276011228584	0.7453722387871993	0.7310055872261484	0.7166958170824524
PRKCQ	0.1351191830996421	0.2264146275168007	0.0720488202583547	0.0900490942810271	0.0335462935097453	0.09380005852641139
H4C2	1e-08	0.4485457923552017	1e-08	1e-08	1e-08	1e-08
GP1BA	1e-08	1e-08	0.0197212462632388	1e-08	1e-08	1e-08
H2AX	74.27804309685656	68.57421373620386	71.53479571188596	58.63067060925413	57.63828874914055	54.35105010622366
H3C7	0.3024942490257026	0.0503284552151007	0.0501813743378365	0.0495145341822268	0.050067207569056	0.0515770449930545
H2AC14	0.3139331068039855	0.7312427140076397	0.1041579679113078	0.2055476986220173	0.1558814948683635	0.2141097182904951
H3C2	0.0974769532998676	0.3892329170255929	0.4366073404227424	0.2872036297184352	0.0484015669454279	0.1495835048330856
ITGA2B	0.9664338894971789	0.9075901209241128	1.3823458659013812	1.1108673976030956	0.8815511035010338	0.6884251887690368
H4C1	1e-08	0.2473856014055696	1e-08	1e-08	1e-08	0.0633807445437037
H2AJ	118.82266446289947	116.77238329772321	112.47278690334376	108.49271146412121	105.87403407459307	89.95750327177318
ASH2L	9.173614182494317	8.382204522952662	8.351264320326768	7.490014589259587	8.062237410906826	7.113206502793092
NFE2	0.3111614169604721	0.09939931809099349	0.07433162614060339	0.0855678383968717	0.16068543867989898	0.08913213743927159
CBFB	30.929054661897958	30.93105307301109	33.229446188087486	26.481612515375268	27.32962871444501	31.06428534821948
DPY30	7.1497462837423305	8.519061673131425	8.68980835783364	7.3034655973022735	7.197921123191584	7.4736328004043004
WDR5	19.492415839615823	17.820174510703122	17.536363876840817	17.103258584080866	16.490723787581523	16.386623087503548
H2AZ2	39.65215992772788	40.748211345910896	39.86667197365289	35.13160143877897	36.26104939387408	38.52802887945367
SIN3B	9.659471203150545	9.319982299124419	9.945338382148044	10.091035040020541	9.659592809798095	7.603288235616943
H2BU1	0.6007871791760483	0.2726124215817955	1.3047154827837508	0.6973295588996948	0.5423946503314404	0.78225170739466
HDAC1	88.19942615121153	91.37697713838847	92.53724488176043	88.17790377382121	94.07712505372992	83.76201223157923
H3C4	0.21241245360866678	0.1855392035541772	0.8192723058098392	0.0782308467143498	0.5273602573158568	0.5704266208933342
PRMT1	168.82223939572032	156.8844129527173	156.45467229506505	166.3291896429364	167.21074034441378	147.02522686362732
H2AB1	0.1272846386871355	0.5082572897872522	0.08446199972024279	0.4583678539628973	0.2106745892088048	0.043405555632996404
H2BC10	1e-08	1e-08	0.257153474552814	0.2029890137014112	1e-08	0.0528611205530475
H4C3	0.4919577189010604	0.0613882863858265	0.428462128222812	0.3623729721632602	0.1832088662897309	0.4403787433481048
H3C13	0.21241245360866678	1e-08	1e-08	0.0521539011428999	1e-08	0.1629790416838097
H2BC14	1e-08	1e-08	0.10593844582432159	1e-08	0.0528487185451147	0.0544424358260019
H2AC7	0.0488340472806199	1e-08	1e-08	1e-08	1e-08	0.0499589419344488
H4C4	1e-08	0.061692942844317	0.5536137714045196	1e-08	0.1227453975886535	0.5057877079964055
RBBP5	8.997371987717496	9.12857888850409	7.85791853863674	8.08118859911426	8.407264726592457	9.684818027646774
AGO1	4.015041451588544	4.326110018917572	3.6226039613371896	3.794700582231638	4.126912381297016	4.265930161238458
H2BC6	0.26495063779910827	0.5818825021252282	0.10548764396975	0.7286009658388956	0.2104952916945845	0.1084215218577401
H4C11	0.2560962466387268	0.1278264981041632	0.1274529353619088	0.6287962811059142	1e-08	1e-08
H4C15	0.4210147190872383	0.0373587657269117	0.1489983209414952	0.2848480277785957	0.1858241692720787	0.2201421105225714
RUNX1	4.533212286510183	4.688933489206883	4.566504164743128	4.638511948632383	4.616063870083889	5.2904917529059885
MOV10	24.880299728435745	23.908073238917304	25.90845736943688	27.26586988298916	27.95416372939498	23.706471890115083
KMT2B	7.058555703364625	6.975392688841053	6.935200883423866	7.753213778416589	7.718360558793153	6.8954274822582935
H3-3A	108.28489539745624	123.02815419592875	124.57934028058891	130.30125367686827	132.2529721881025	129.03467946396432
PRMT6	9.682777894153144	10.804313232205212	8.55009270764735	10.452268586704491	10.6066813733742	11.11124006820232
H2BC7	0.1053080819370663	0.3679403134964445	0.6289114852530554	0.8791183484404674	0.3660303888452342	0.3232015569755043
SETD1B	4.072664440667011	4.2970382669679	3.9027515333924416	4.761610715419212	4.783494401324791	4.3626513978404615
SIN3A	12.798033828206638	12.467590614303058	11.657719740354334	13.831413602809475	13.830802989024372	14.591005670775138
H4-16	0.3626994131036337	0.7241432702794103	0.1203378448684042	0.7718016466462642	0.8404484041446397	0.24736947880164
H4C14	1e-08	0.1883504034565132	0.2503999492211238	0.4941449584044457	0.0624575746442264	0.2573642048138275
SETD1A	4.91903599214925	5.048514685022286	4.842477892403153	6.096004081425876	5.8024405099680525	5.249644269666698
KMT2D	5.367627363180875	5.669728834425727	5.275804538947137	6.5489499762787	6.608942444042275	5.755156339241373
H3C1	0.588315577238965	0.0489414508194089	0.2927904901128889	0.7703992208982697	0.4381865462047699	0.4012449751428177
H3C11	1e-08	1e-08	0.0493816713205005	0.1949018023985662	0.049269323942457505	1e-08
AGO4	3.5384828302328377	3.55045748742996	3.3235260171699643	4.261685428889203	3.985159407673255	4.6246865798504135
H4C5	0.7858487167245398	1e-08	0.601689184342021	1.5436032832925282	0.4202242070723198	1.1131626196073798
H4C13	1e-08	1e-08	1e-08	1e-08	1e-08	0.0658373621616768
H2AC4	1e-08	1e-08	1e-08	1e-08	0.09386412992073499	1e-08
MYL9	43.57990854874422	41.639363805616654	42.247305189744345	54.37252816531309	58.530494835899674	49.21134117906941
H3C12	1e-08	1e-08	0.0484171857478344	0.1910951267657817	1e-08	0.1492913495697397
EP300	12.692399625523615	12.31926142049435	11.554735011479789	16.577974828181958	15.878379141632841	17.46587934871418
AGO3	0.6468115701234404	0.6901000262352669	0.6331782937769176	0.8309801255169178	0.852625086024174	1.117718007067361
H4C12	0.5148394728034353	0.4497048253845433	0.2562232036216151	1.2008871520526645	0.4473704730330639	0.9875602924251521
H2BC13	0.276112637639869	0.4410155654103725	0.10993169063366409	0.5965896428297577	0.6032486831491142	0.3954620654456374
TNRC6B	1.856101292056844	1.9447344611658364	1.5276166003366443	2.6348577030823623	2.3928089000095523	2.6832263591102405
TNRC6A	4.36863591480181	4.69125051368779	4.024605407620792	5.898486199395497	5.512688803339414	8.408426621835828
KMT2A	6.508592544477455	6.424373751239643	5.571312436959153	8.47222301064555	8.122453130877863	10.256315336445672
THBS1	48.88344186293622	51.828011909993535	50.826783410535825	72.73989374150118	76.36521004506032	73.95435639962
H4C9	0.31366951898131207	0.06262532973868949	0.5619807300151672	0.8009629175522943	0.6853026588419409	0.6417898157070258
TNRC6C	0.6317980368972874	0.5786416279971905	0.5769505939023993	0.9146589391170601	0.8301617146250314	1.0000155818552836
KAT2B	3.5451721921155066	3.7327407197395663	3.314675137213298	5.227853783470281	4.92164032188933	6.325501417215151
H2AC18	0.1869070194792959	0.18658351421208058	0.232547795955828	0.688372663265105	1.392112332651802	0.3824248548265504
LOC102724334	1e-08	1e-08	1e-08	0.056359860106037	0.056988939951874804	1e-08
KMT2C	2.8719540429826087	2.979967721060445	2.7741138560745164	4.24204239299246	4.282366528183284	5.698195912250728
H2BC17	0.5333053421866422	0.6920969589751108	0.3715785065315607	0.8904132307330644	1.5358943833924983	1.0366211030295707
H2BC15	0.6892627133150235	0.9632975942462264	0.503109850981188	2.391862135717829	1.8709613007078607	1.1752331874247655
H2AC19	0.09327850817646509	0.1862341069008221	0.1392673919263554	0.824500289079328	0.2779010841473447	0.7634173968634883
H4C8	0.5480396948851972	0.5470911284018039	1.2728153489748568	3.1696559321004	3.930703467071856	1.8688793708730256
H2BC8	1.018624100515999	0.5592735709383584	1.2166671993443565	2.501040393028636	3.995751446257629	4.585187873431626
H3C8	0.502124183651536	0.5012550893600757	0.09995805025359379	1.4301312064406888	1.246632852697262	1.386964713099518
H3C10	1.5886134449930076	1.2789224347047194	1.2241774906366056	3.6237296316326018	2.595458807437856	3.2504144704264886
H2AC8	2.0714321909748468	1.442683874773293	1.006927425165796	3.5956930388153285	4.640464174630614	4.928250548988187
H2BC11	1.4528126190984438	1.81287254701894	1.3944146715376335	5.605456768462932	5.668024001463553	3.5033701119032266
H2BC21	3.516314187211548	3.44315360548921	4.023850472150965	9.447522617298217	9.57521647170723	10.562809800564995
H2BC4	0.6364931092634805	1.3015276257893604	0.5517881695532268	3.428054206886571	3.77216916567686	4.127480936472212
H3C6	0.4243135339271646	0.1104989074944877	0.2019892943050399	1.277364701625492	1.3099433324715763	1.3777563329033564
H2AC6	12.284724301633418	11.880228295534526	11.702216822732868	42.88778267065175	40.7930933295401	45.8524810074092
H2BC12	29.790964962554984	26.544027725488142	25.544181408379497	101.56349981404948	102.94809262773136	102.54817066732927
H2BC5	2.9810960130851183	4.143708666043292	4.563538902304981	15.713809369261375	15.083501871580692	15.750688732606244
