# Supplementary material for: Peptide-based Self-adaptive Implant Coating Sequentially Regulates Bone Regeneration to Enhance Interfacial Osseointegration
Source: Research Square preprint supplement (doi:10.21203/rs.3.rs-5132912/v1), 2024-10-01
Supplement: Supplementary file 925 [file 1197_Estrogen-dependent gene expression(R-HSA-9018519).heatmap-data.xls]

id	S1	S2	S3	C1	C2	C3
H2BC9	9.757294341978419	10.49380764543431	12.555768390944927	4.235528139180963	3.5333136670162397	4.301658694745401
GREB1	0.0978103766822831	0.055119970585867505	0.0690911695139808	0.018592655806818303	0.0219335463519092	0.0274367579490512
H2AC20	2.0670439766756346	1.0568973595171147	2.509068226891828	1.1883485903734443	0.5507391832596165	0.412616289944436
H3-3B	175.77382955506508	185.9475855635937	188.4559004403793	126.56897181016372	124.616903085904	125.79400494609169
POLR2G	118.76487257317855	120.47662664929658	121.31544666963599	87.38869077795538	89.14581625914424	77.8222472569665
FKBP4	41.96287092353821	37.99543511833709	40.77841214350085	31.9334393428404	32.9808846624202	27.726459494665804
KDM1A	39.394224269150364	39.429122023451576	37.83641062394909	32.38960715541656	30.61045406062632	28.58223124492015
H4C2	1e-08	0.4485457923552017	1e-08	1e-08	1e-08	1e-08
PTGES3	93.24760264328735	90.04678557609812	99.50966671924141	74.2289742328206	72.35296708515679	77.7574637853602
H2AX	74.27804309685656	68.57421373620386	71.53479571188596	58.63067060925413	57.63828874914055	54.35105010622366
POLR2D	13.911012368656001	13.294741319306029	14.048092670014801	10.865794279391208	11.109809783877383	11.090823400918152
H3C7	0.3024942490257026	0.0503284552151007	0.0501813743378365	0.0495145341822268	0.050067207569056	0.0515770449930545
H2AC14	0.3139331068039855	0.7312427140076397	0.1041579679113078	0.2055476986220173	0.1558814948683635	0.2141097182904951
KCTD6	1.4358356790326565	1.8611042901667423	2.162448745603856	1.4101700717838308	1.2542037107700266	1.7611541484317184
HSP90AB1	820.9612092438223	814.1342876790771	828.7675114506245	671.0532519517053	692.3043146403733	652.5260997388202
H3C2	0.0974769532998676	0.3892329170255929	0.4366073404227424	0.2872036297184352	0.0484015669454279	0.1495835048330856
CCND1	113.0731507347212	112.6486459939688	114.34916772390781	96.82489262312707	97.14694997291795	97.89416169740011
GTF2F2	4.79401329838559	5.438777059877468	5.020999242734184	3.970449093172968	4.1112022335341845	5.186789019701697
GTF2A2	19.09834419199675	21.450034716232263	19.27517410690117	17.80850493243399	17.62871136304174	16.65238257229326
TLE3	3.1131698866395228	3.359232849049002	3.662811383894332	3.0265987746545053	3.1111921239213793	2.6896347968881225
H4C1	1e-08	0.2473856014055696	1e-08	1e-08	1e-08	0.0633807445437037
H2AJ	118.82266446289947	116.77238329772321	112.47278690334376	108.49271146412121	105.87403407459307	89.95750327177318
KPNA2	127.89395317059429	132.97537779029835	122.7537548297094	106.7543144402989	105.38993370505783	123.72288735530883
CARM1	19.58433276512104	16.53906482651377	19.05194316005589	17.267946552685327	16.573309389066196	14.811805821318055
POLR2C	56.1500072634938	50.316462261954264	51.20934268214047	46.11935481184961	47.62962895001654	45.642752110656346
CBFB	30.929054661897958	30.93105307301109	33.229446188087486	26.481612515375268	27.32962871444501	31.06428534821948
GPAM	2.196568871435457	2.2777326072099164	2.3492767268328865	2.0576382809585754	1.7587616844375	2.3911731796385656
H2AZ2	39.65215992772788	40.748211345910896	39.86667197365289	35.13160143877897	36.26104939387408	38.52802887945367
GTF2F1	47.93199624653836	45.904829315692865	46.397269316841104	45.85799782546493	46.154956252421854	36.21608214916333
POLR2J	41.54980203126645	39.825502650051774	43.507644341819	38.08261084903432	40.07538709459465	36.141059970333146
POLR2K	40.237802850620646	44.71004757858539	44.42232417997516	38.38206967186464	36.5905037421629	44.09733012054537
EBAG9	4.654162091552973	5.307382288621252	5.0178591029099415	3.8612435161592984	4.263165676306643	5.650277555415284
TBP	12.016802204804579	10.924931393946128	11.533769100585921	10.537501333002721	10.28219010290025	10.948996304389876
JUN	31.603883584212213	29.930884210821148	31.78426297363337	29.02627454680305	32.06126860670186	25.197432333622505
KANK1	1.8431132297060215	1.618666529503562	1.528014327633953	1.3725194285167228	1.5500241651107307	1.7017860914354699
BCL2	0.5095479844046161	0.5086660407360614	0.4330164654046824	0.5169637537925491	0.3819061377608752	0.4548953224894085
USF2	25.06611028316077	22.787169712541214	23.884743466918827	25.293116591172762	24.353362424974165	17.47750911153693
GATA3	0.1933530510095613	0.0148475775940637	0.0666188054153542	0.0657335347877517	0.0886229861688158	0.0684716426005136
POLR2I	116.43114790201719	118.4745233450888	108.55939578157799	101.15359030595656	114.11885284202792	111.75125152648626
POLR2H	31.104221548887377	32.740052868693326	32.19584073888305	29.015423776505706	31.194824821238704	31.47214288162684
RAD21	67.14239820191732	76.9507076422269	67.55503016993373	59.41282931877552	60.64363315383776	83.1550042171218
CDK9	30.26156591518386	27.21530438485059	28.902889490656552	30.15408599862965	28.75744491319824	24.56579072930971
H2BU1	0.6007871791760483	0.2726124215817955	1.3047154827837508	0.6973295588996948	0.5423946503314404	0.78225170739466
GTF2A1	5.398095259799119	5.661552946033897	5.451251475048838	4.786885291785378	4.505731719924212	6.778585288404778
POLR2F	16.0689497499328	15.678625471626745	15.941546322813124	16.509875079883532	15.146452721972413	14.953078628970585
POLR2E	80.50283762879647	78.72359720823975	79.17551463351349	82.66355445137239	84.94709076174543	65.42467395930375
HDAC1	88.19942615121153	91.37697713838847	92.53724488176043	88.17790377382121	94.07712505372992	83.76201223157923
HSP90AA1	168.1159154199381	218.43309286558292	185.98174191972402	164.42776654863044	156.91357148038608	238.58072486143644
H3C4	0.21241245360866678	0.1855392035541772	0.8192723058098392	0.0782308467143498	0.5273602573158568	0.5704266208933342
FOS	0.5681831053562628	1.0162327412349514	0.6715812158102672	0.8835424510159339	0.6582979917254592	0.6902595876304319
PRMT1	168.82223939572032	156.8844129527173	156.45467229506505	166.3291896429364	167.21074034441378	147.02522686362732
H2AB1	0.1272846386871355	0.5082572897872522	0.08446199972024279	0.4583678539628973	0.2106745892088048	0.043405555632996404
H2BC10	1e-08	1e-08	0.257153474552814	0.2029890137014112	1e-08	0.0528611205530475
H4C3	0.4919577189010604	0.0613882863858265	0.428462128222812	0.3623729721632602	0.1832088662897309	0.4403787433481048
H3C13	0.21241245360866678	1e-08	1e-08	0.0521539011428999	1e-08	0.1629790416838097
H2BC14	1e-08	1e-08	0.10593844582432159	1e-08	0.0528487185451147	0.0544424358260019
CITED1	0.11924591498756029	0.0170056542792474	0.0169559566367245	1e-08	0.06766949180332059	0.08713768197868979
H2AC7	0.0488340472806199	1e-08	1e-08	1e-08	1e-08	0.0499589419344488
H4C4	1e-08	0.061692942844317	0.5536137714045196	1e-08	0.1227453975886535	0.5057877079964055
AXIN1	7.649404687520466	6.705148936547087	6.92334354257653	7.972907062133823	7.505277036478879	6.06778462076563
SP1	19.17980375200089	18.79561774759205	17.931599853860604	18.874980236445737	18.05097231941661	19.86580920895673
AGO1	4.015041451588544	4.326110018917572	3.6226039613371896	3.794700582231638	4.126912381297016	4.265930161238458
H2BC6	0.26495063779910827	0.5818825021252282	0.10548764396975	0.7286009658388956	0.2104952916945845	0.1084215218577401
POLR2A	76.57226249661443	77.51909431948494	78.72505080794168	80.04192676697926	80.61651161013376	77.47535526129165
CTSD	299.74902408367524	276.2916046174764	278.8497588949219	307.7101911070855	316.4765831139875	257.3818533890191
POLR2B	25.326418587556965	27.89239771593259	25.183675350681362	24.67002757983149	25.30737022307241	31.072489083930762
H4C11	0.2560962466387268	0.1278264981041632	0.1274529353619088	0.6287962811059142	1e-08	1e-08
H4C15	0.4210147190872383	0.0373587657269117	0.1489983209414952	0.2848480277785957	0.1858241692720787	0.2201421105225714
CCNT1	7.013703240237992	7.168181330200764	6.977490624065548	6.649575541654056	6.76703691779946	8.812249026654227
KDM4B	5.699353227173962	5.61803117101806	5.64829302949128	6.293222424258483	6.476224268955238	5.118537677579306
RUNX1	4.533212286510183	4.688933489206883	4.566504164743128	4.638511948632383	4.616063870083889	5.2904917529059885
POLR2L	229.80595537874214	225.0658194786528	234.4257951632776	255.6870114034997	262.66314916360113	209.9404350082357
MOV10	24.880299728435745	23.908073238917304	25.90845736943688	27.26586988298916	27.95416372939498	23.706471890115083
SMC1A	30.004311175549738	29.75458228699002	29.043518277568676	31.44105469388722	31.645040300708892	31.79108711982769
KAT5	16.000709089763667	15.89867200853945	17.419428502890277	18.588061192814905	19.091364575398728	15.1720645420278
USF1	20.29521809941169	20.656828480445604	20.939295352995384	25.40995834488148	23.44391200873435	17.510074175025025
DDX5	122.6738799630077	137.38011179102975	133.93492767540474	135.25352755615472	139.8601175019003	150.22916844048456
H3-3A	108.28489539745624	123.02815419592875	124.57934028058891	130.30125367686827	132.2529721881025	129.03467946396432
TGFA	66.57918920739209	62.50756127075168	66.43384799428713	71.95088905212842	71.39310319712197	71.95215408296141
H2BC7	0.1053080819370663	0.3679403134964445	0.6289114852530554	0.8791183484404674	0.3660303888452342	0.3232015569755043
ZNF217	20.100567826629682	20.36573527986048	18.090165629366012	20.070103340981188	19.99003768024769	25.309253480342218
MED1	11.315065018411461	10.761955783758054	8.745513423706702	11.154799596051333	10.396737534679547	13.10663850505293
FOXA1	0.27279233664098357	0.14485116320589458	0.23686166306421388	0.2394144466657755	0.2593786634514369	0.2672005431847125
H4-16	0.3626994131036337	0.7241432702794103	0.1203378448684042	0.7718016466462642	0.8404484041446397	0.24736947880164
H4C14	1e-08	0.1883504034565132	0.2503999492211238	0.4941449584044457	0.0624575746442264	0.2573642048138275
MYC	24.91087149744401	26.45259962434277	24.207987759560925	30.009462100701462	29.747716894812694	28.298782530584962
MYB	0.2298540291221363	0.24295361198299428	0.1211218047046804	0.31869935783088027	0.11413256298179489	0.5463749740713749
H3C1	0.588315577238965	0.0489414508194089	0.2927904901128889	0.7703992208982697	0.4381865462047699	0.4012449751428177
H3C11	1e-08	1e-08	0.0493816713205005	0.1949018023985662	0.049269323942457505	1e-08
AGO4	3.5384828302328377	3.55045748742996	3.3235260171699643	4.261685428889203	3.985159407673255	4.6246865798504135
YY1	16.348191746647583	16.662350978607506	17.28897763167669	19.275396520109783	20.91382089844553	22.39848387379735
H4C5	0.7858487167245398	1e-08	0.601689184342021	1.5436032832925282	0.4202242070723198	1.1131626196073798
H4C13	1e-08	1e-08	1e-08	1e-08	1e-08	0.0658373621616768
H2AC4	1e-08	1e-08	1e-08	1e-08	0.09386412992073499	1e-08
CREBBP	6.002527795994773	6.323460720774111	5.794236162760662	8.129802151010177	7.910459202141568	7.653098678401292
CXXC5	0.2645802846710693	0.3127764531455657	0.2286990878404841	0.3829381696245802	0.3249818923478733	0.3632742117374937
SMC3	3.973491732302672	5.177759830119289	4.69125783544755	6.440618331534438	5.464414829072561	13.750015358420027
NCOA1	1.6698631397598254	1.5467736991642516	1.2174024625949142	1.9667723466265492	1.6929337545703766	2.301543172018312
JUND	40.256562686462544	38.318027488745585	40.030889204767384	54.52501414576271	53.99247625047056	51.44682237453393
H3C12	1e-08	1e-08	0.0484171857478344	0.1910951267657817	1e-08	0.1492913495697397
EP300	12.692399625523615	12.31926142049435	11.554735011479789	16.577974828181958	15.878379141632841	17.46587934871418
ATF2	7.91668852058225	8.27501631285516	7.265184565481813	9.971259869354482	9.543270222997048	15.446473031100787
AGO2	5.509098756063461	5.148330792276103	4.880504810816714	6.769449882203014	7.036790536552233	7.998656114886553
CHD1	1.6587774894653975	2.4207774741394683	1.7585175660334114	2.6815944088817854	2.876257030723654	5.899051820718462
NRIP1	0.9047064803977884	1.2051461878450758	0.9836685356977909	1.3073346727789528	1.4592699956024962	2.470088895949185
AGO3	0.6468115701234404	0.6901000262352669	0.6331782937769176	0.8309801255169178	0.852625086024174	1.117718007067361
STAG2	6.253576595095664	7.8523822925807245	6.969136376143825	9.473056973637984	9.196507559976652	15.603970876665132
STAG1	4.244213618799924	4.236867583670164	3.815784335603916	5.048210576647127	5.508622411121542	7.7216201822785315
H4C12	0.5148394728034353	0.4497048253845433	0.2562232036216151	1.2008871520526645	0.4473704730330639	0.9875602924251521
H2BC13	0.276112637639869	0.4410155654103725	0.10993169063366409	0.5965896428297577	0.6032486831491142	0.3954620654456374
NCOA2	1.5995892370582854	1.5206519966917447	1.3846586596270025	1.9095502943684355	1.982281948437636	2.8533085154765896
TNRC6B	1.856101292056844	1.9447344611658364	1.5276166003366443	2.6348577030823623	2.3928089000095523	2.6832263591102405
TNRC6A	4.36863591480181	4.69125051368779	4.024605407620792	5.898486199395497	5.512688803339414	8.408426621835828
POU2F1	1.7940871060704136	1.581166721042174	1.0962182154276112	2.0477057170662216	1.941986674985769	2.7126971600755603
H4C9	0.31366951898131207	0.06262532973868949	0.5619807300151672	0.8009629175522943	0.6853026588419409	0.6417898157070258
TNRC6C	0.6317980368972874	0.5786416279971905	0.5769505939023993	0.9146589391170601	0.8301617146250314	1.0000155818552836
KAT2B	3.5451721921155066	3.7327407197395663	3.314675137213298	5.227853783470281	4.92164032188933	6.325501417215151
H2AC18	0.1869070194792959	0.18658351421208058	0.232547795955828	0.688372663265105	1.392112332651802	0.3824248548265504
LOC102724334	1e-08	1e-08	1e-08	0.056359860106037	0.056988939951874804	1e-08
H2BC17	0.5333053421866422	0.6920969589751108	0.3715785065315607	0.8904132307330644	1.5358943833924983	1.0366211030295707
H2BC15	0.6892627133150235	0.9632975942462264	0.503109850981188	2.391862135717829	1.8709613007078607	1.1752331874247655
H2AC19	0.09327850817646509	0.1862341069008221	0.1392673919263554	0.824500289079328	0.2779010841473447	0.7634173968634883
NCOA3	8.318408620437632	7.6879770509833385	6.9799257341278125	12.650970232988477	12.52599708040584	15.617120870169517
NR5A2	0.48828054450540237	0.5209465951121698	0.6986406932575654	1.0010658636908099	0.9213198803750224	1.201989507038235
H4C8	0.5480396948851972	0.5470911284018039	1.2728153489748568	3.1696559321004	3.930703467071856	1.8688793708730256
FOSB	0.7059267422922998	0.7310490073310815	0.7814468136990889	1.4125346161542711	1.4807158259999182	1.4038790827434002
ERBB4	0.0495254614260184	0.045484562540087	0.0414080177665221	0.1692678448953027	0.1219740894738345	0.2614379778625033
H2BC8	1.018624100515999	0.5592735709383584	1.2166671993443565	2.501040393028636	3.995751446257629	4.585187873431626
H3C8	0.502124183651536	0.5012550893600757	0.09995805025359379	1.4301312064406888	1.246632852697262	1.386964713099518
H3C10	1.5886134449930076	1.2789224347047194	1.2241774906366056	3.6237296316326018	2.595458807437856	3.2504144704264886
H2AC8	2.0714321909748468	1.442683874773293	1.006927425165796	3.5956930388153285	4.640464174630614	4.928250548988187
H2BC11	1.4528126190984438	1.81287254701894	1.3944146715376335	5.605456768462932	5.668024001463553	3.5033701119032266
H2BC21	3.516314187211548	3.44315360548921	4.023850472150965	9.447522617298217	9.57521647170723	10.562809800564995
H2BC4	0.6364931092634805	1.3015276257893604	0.5517881695532268	3.428054206886571	3.77216916567686	4.127480936472212
H3C6	0.4243135339271646	0.1104989074944877	0.2019892943050399	1.277364701625492	1.3099433324715763	1.3777563329033564
H2AC6	12.284724301633418	11.880228295534526	11.702216822732868	42.88778267065175	40.7930933295401	45.8524810074092
H2BC12	29.790964962554984	26.544027725488142	25.544181408379497	101.56349981404948	102.94809262773136	102.54817066732927
H2BC5	2.9810960130851183	4.143708666043292	4.563538902304981	15.713809369261375	15.083501871580692	15.750688732606244
