# Supplementary material for: Peptide-based Self-adaptive Implant Coating Sequentially Regulates Bone Regeneration to Enhance Interfacial Osseointegration
Source: Research Square preprint supplement (doi:10.21203/rs.3.rs-5132912/v1), 2024-10-01
Supplement: Supplementary file 969 [file 9_Response of EIF2AK1 (HRI) to heme deficiency(R-HSA-9648895).heatmap-data.xls]

id	S1	S2	S3	C1	C2	C3
CHAC1	2.8751129893138563	2.6984190657361347	3.2001038213089363	0.390172180656791	0.5287478192229532	0.20111736796009008
ASNS	1.0784875639239917	1.1535223701728927	1.433855275945149	0.3480260067574769	0.3519106185862138	0.2285470571111966
TRIB3	48.48802409900728	44.50729557465153	46.48851644617983	18.210473520654183	18.67003852733614	12.500248960502566
DDIT3	23.82711342916973	28.956714489243108	27.735725705628774	10.652011680040998	8.146417575752215	11.138975793177417
ATF3	5.9786765630439405	4.771192810049847	5.293521125676711	1.9714935244908007	2.1402067471180017	2.124736302215622
ATF4	88.59865210318637	90.22393941736252	94.15933392013181	44.35863505661207	46.15516893582139	44.00387387583949
PPP1R15A	57.84402107110133	53.76594228237109	57.1004562778257	33.23461218133705	30.51129109163003	26.465691054474362
CEBPG	10.957662619074616	12.743494894965156	12.089108662429057	6.2146372927021645	6.140139541003793	7.279730091876835
GRB10	5.269683929177653	5.287439146920043	5.339874355262467	3.5061464475637	3.490025736654986	3.340040480327823
CEBPB	47.979441638209124	45.926759516544344	47.13315593192989	33.232419860759705	33.849748256415076	27.811815102217786
EIF2S2	82.19941675281851	95.57578344599179	92.76913334705135	60.870610340001484	59.12831586858099	82.11251398535569
EIF2S1	23.292566154910052	26.418387118004468	26.29940797403509	20.8565093164042	21.32151504139772	26.87752053617839
EIF2S3	42.36144374651234	44.52479079316	42.350981225781254	38.73155848686255	37.382397176725185	44.88500050036874
EIF2AK1	51.36663000224849	48.13366372403854	51.11179149482855	61.621028721828324	59.77456265550172	62.02326883448176
ATF5	17.381489711990273	14.895763109293107	15.614574222812477	22.469024680023495	22.299248719475866	23.10076431830019
