# Supplementary material for: Peptide-based Self-adaptive Implant Coating Sequentially Regulates Bone Regeneration to Enhance Interfacial Osseointegration
Source: Research Square preprint supplement (doi:10.21203/rs.3.rs-5132912/v1), 2024-10-01
Supplement: Supplementary file 973 [file 10_Pancreatic cancer subtypes(WP5390).heatmap-data.xls]

id	S1	S2	S3	C1	C2	C3
LGALS4	0.1944646090985089	0.15252916298318858	0.15208340866804448	0.0409261253586504	1e-08	0.028420595930361302
TNS4	0.3531892359781599	0.3580869534648535	0.329575821870923	0.10839874674283209	0.12604997649226998	0.1185597620536112
KRT15	6.379120537056985	6.276151675254142	6.37446703417204	2.2034712320280256	2.435908013542961	1.4388172497121272
CTSV	10.316801366434161	12.663007763704632	12.332766625237307	6.181814014783505	7.021616958974946	7.401445324137515
CDH17	1e-08	0.0065738471063616	0.0065546355903995	1e-08	1e-08	1e-08
ANXA8L1	2.2540458554007237	2.053410530947269	1.4957124065938348	1.1129258730236626	1.6023979444628547	0.8820642385162337
LEMD1	0.0759309826009639	1e-08	1e-08	1e-08	1e-08	1e-08
FAM3D	0.0617615946574486	1e-08	1e-08	1e-08	1e-08	1e-08
LY6D	1e-08	1e-08	0.0330969312054623	1e-08	1e-08	1e-08
BTNL8	1e-08	1e-08	0.019127783134946903	1e-08	1e-08	1e-08
SCEL	0.0776836001843923	0.0077549232677042	0.0463935109037266	0.015259008718665	0.023143985919320303	0.06357843866267969
FAM83A	0.1626593237267496	0.2693995040399231	0.2686122054506549	0.2432583922745056	0.27901483344257677	0.1285866034011197
KRT17	0.3776026845561452	0.22944729220674778	0.1634119676986899	0.24186067195800978	0.4239044830237018	0.016795695752517402
KRT7	221.9138539493164	205.17890722421572	212.99137263552484	222.29010340457424	226.21961110910055	175.9432061104962
VSIG2	0.206540651435656	0.2577289519791957	0.0171317266433249	0.1014243705225434	0.3076693401893892	0.0528245890322783
LYZ	0.0167150160490712	1e-08	0.0166373213979136	0.0164162347959866	1e-08	0.017100047105079803
CTSE	0.0334599638913338	1e-08	1e-08	0.0109539620582266	1e-08	0.0228204804761029
S100A2	62.705303366954034	63.72790146991239	64.57926076797789	75.20557884767223	71.74652191170556	54.551607916548384
SLC2A1	62.528348170589574	57.57844812597744	59.043772912512885	72.67216280766127	71.14448167719048	68.35072811031698
PLA2G10	1e-08	1e-08	1e-08	0.0156095664428972	1e-08	1e-08
GPR87	1e-08	1e-08	1e-08	1e-08	1e-08	0.06826271672891869
CST6	1e-08	1e-08	1e-08	0.1652714623379733	1e-08	1e-08
FGFBP1	0.018434768706969702	0.11041711704482489	1e-08	0.2896837991460555	0.036614659295505	0.15087524485755088
AREG	12.129757519629521	12.552012130170036	13.017550172814863	17.9586049541606	14.871986342692347	15.8160100177081
MYO1A	1e-08	0.0058623660330723	1e-08	0.0057675589144117	0.005831935394745	0.0060078042198936
