# Supplementary material for: Peptide-based Self-adaptive Implant Coating Sequentially Regulates Bone Regeneration to Enhance Interfacial Osseointegration
Source: Research Square preprint supplement (doi:10.21203/rs.3.rs-5132912/v1), 2024-10-01
Supplement: Supplementary file 981 [file 2_Photodynamic therapy-induced unfolded protein response(WP3613).heatmap-data.xls]

id	S1	S2	S3	C1	C2	C3
ASNS	1.0784875639239917	1.1535223701728927	1.433855275945149	0.3480260067574769	0.3519106185862138	0.2285470571111966
TRIB3	48.48802409900728	44.50729557465153	46.48851644617983	18.210473520654183	18.67003852733614	12.500248960502566
DDIT3	23.82711342916973	28.956714489243108	27.735725705628774	10.652011680040998	8.146417575752215	11.138975793177417
ATF3	5.9786765630439405	4.771192810049847	5.293521125676711	1.9714935244908007	2.1402067471180017	2.124736302215622
ATF4	88.59865210318637	90.22393941736252	94.15933392013181	44.35863505661207	46.15516893582139	44.00387387583949
PPP1R15A	57.84402107110133	53.76594228237109	57.1004562778257	33.23461218133705	30.51129109163003	26.465691054474362
BBC3	10.366750878675045	9.07221062815539	9.442164384796548	6.29005341573159	6.651730644610119	5.02932531698688
ERN1	1.2707515573334494	1.2890862120727504	1.2079723331086776	0.8484854766050826	0.8647653145115457	0.8440799364431845
XBP1	75.6685300555349	78.62125044822915	83.88747360171679	53.546925628264084	59.66643776538122	53.14391067490551
WARS1	40.134164390201	37.070398076396266	37.8037338192714	31.652500580762677	29.85095485223586	27.290826684659343
NARS1	73.88649955868719	90.85253758880872	82.5990707647242	57.51949178204935	59.35250559686658	74.92428930670991
CALR	527.4669433172439	521.3095014194232	548.4485764079171	439.3309907290474	437.5993165700157	390.81734514469923
PDIA6	117.68353720176488	127.23113796554769	129.97468982912883	108.88997793525488	105.27462743186847	100.11760471787592
EDEM1	11.257377655514588	10.864236571399767	11.581130333780905	8.808853598953775	9.878549847332092	10.718326542716575
HSPA5	278.9832131122925	302.36074563115443	307.66029380990756	261.20796872710076	262.357325018502	259.00132253284215
DNAJB11	50.7978206800449	52.908084923138134	52.01280055581026	45.63910692147646	44.4594272210897	51.4241908627702
UBE2E1	29.2130796981751	34.143584818132105	36.148985065814045	29.945697725543454	30.30566602139233	34.23996442803387
ATF6	10.85861027680858	10.846118028327766	10.877259118842783	10.289394261690825	10.131519423984212	11.55760949930674
EIF2A	13.173555634283606	16.554051142481413	14.50592752349959	14.599427313204453	13.185868760959037	16.517456540603302
HSP90B1	193.20900727853828	244.90479945689512	212.39567297053065	214.9892874938543	209.06751536181784	311.38116488708727
DNAJC3	4.845343808625592	4.880664761624387	4.147336126094612	4.468479083789483	4.971278117527684	6.453748411769363
DNAJB9	4.249108583844231	4.355280340884853	4.970267296731623	5.178368304923301	4.26080373504449	6.620958336854358
NFE2L2	18.240434331241378	22.19620543359793	20.34617620350509	22.26798946557487	20.626551811525	31.151750624522005
EIF2AK3	3.293019407584524	3.4693866715692003	3.328139153349925	3.965573531557769	3.934369204163323	5.042945655612604
BCL2L11	2.5868978560780245	2.153092978253084	2.1725494696795122	3.255216748466705	2.8965648542483167	3.192325166003507
