# Supplementary material for: Peptide-based Self-adaptive Implant Coating Sequentially Regulates Bone Regeneration to Enhance Interfacial Osseointegration
Source: Research Square preprint supplement (doi:10.21203/rs.3.rs-5132912/v1), 2024-10-01
Supplement: Supplementary file 985 [file 3_Unfolded protein response(WP4925).heatmap-data.xls]

id	S1	S2	S3	C1	C2	C3
TXNIP	15.424427381842097	16.594913173996513	15.915790211008323	2.70380493286412	2.7939073263141743	2.554078538120628
DDIT3	23.82711342916973	28.956714489243108	27.735725705628774	10.652011680040998	8.146417575752215	11.138975793177417
IL1B	21.813987280558802	24.65651720713093	24.915829990258	8.87479295667819	8.75344160968632	11.125800090576883
ATF4	88.59865210318637	90.22393941736252	94.15933392013181	44.35863505661207	46.15516893582139	44.00387387583949
PPP1R15A	57.84402107110133	53.76594228237109	57.1004562778257	33.23461218133705	30.51129109163003	26.465691054474362
BBC3	10.366750878675045	9.07221062815539	9.442164384796548	6.29005341573159	6.651730644610119	5.02932531698688
ERN1	1.2707515573334494	1.2890862120727504	1.2079723331086776	0.8484854766050826	0.8647653145115457	0.8440799364431845
XBP1	75.6685300555349	78.62125044822915	83.88747360171679	53.546925628264084	59.66643776538122	53.14391067490551
MBTPS2	3.047349380925597	2.8016167936406062	2.5982795412702044	1.5734615562352086	2.097259285948236	2.2521972046967127
PMAIP1	9.269155518412592	10.17783807901029	11.64200565874484	6.748428690964104	7.05082389665882	9.110801559034417
TP53	10.303805580047344	11.138647899132977	10.80181948196742	9.536819122527676	8.446788109913912	8.370375573457661
RTCB	70.13960939513056	66.5948779056378	69.37157306762042	57.97025118221694	58.29880033500347	52.28317289373207
CASP1	1.3216489721019615	1.533543461616297	1.3411324205147925	1.0451625507672253	0.8096669920523087	1.5979283567110762
TNFRSF10B	36.454767629998976	36.92025757517612	35.690070786768906	31.055489761375153	31.692886716918306	31.743665438314103
HSPA5	278.9832131122925	302.36074563115443	307.66029380990756	261.20796872710076	262.357325018502	259.00132253284215
EIF2S1	23.292566154910052	26.418387118004468	26.29940797403509	20.8565093164042	21.32151504139772	26.87752053617839
BCL2	0.5095479844046161	0.5086660407360614	0.4330164654046824	0.5169637537925491	0.3819061377608752	0.4548953224894085
ATF6	10.85861027680858	10.846118028327766	10.877259118842783	10.289394261690825	10.131519423984212	11.55760949930674
CASP2	19.598433743952533	18.84557519183425	17.65648968020343	19.31768261728581	18.132205269080025	20.647757778376192
BID	23.193232539494748	22.695444114098873	25.85120695834941	28.99936594900801	28.431096378628048	23.593490348614726
MBTPS1	38.40282116401135	37.73969574015393	36.1350960009341	43.73897119559862	44.27391571491382	39.64371528392451
NFE2L2	18.240434331241378	22.19620543359793	20.34617620350509	22.26798946557487	20.626551811525	31.151750624522005
EIF2AK3	3.293019407584524	3.4693866715692003	3.328139153349925	3.965573531557769	3.934369204163323	5.042945655612604
BCL2L11	2.5868978560780245	2.153092978253084	2.1725494696795122	3.255216748466705	2.8965648542483167	3.192325166003507
