# Supplementary material for: Peptide-based Self-adaptive Implant Coating Sequentially Regulates Bone Regeneration to Enhance Interfacial Osseointegration
Source: Research Square preprint supplement (doi:10.21203/rs.3.rs-5132912/v1), 2024-10-01
Supplement: Supplementary file 989 [file 4_DNA replication(WP466).heatmap-data.xls]

id	S1	S2	S3	C1	C2	C3
CDT1	45.46349883912313	42.98631097787253	42.953740935310094	26.58115859435739	26.144398961615664	19.128419894811504
PRIM1	19.497238197358698	22.154135958824572	19.981492840903922	11.946466339925474	12.062429908654178	14.718048812220418
PRIM2	3.860348124671536	4.495362998615348	4.3396568048728135	2.9095565192193877	2.5118296654577508	2.5589849426950972
ORC6	24.750053496390407	27.13142573409298	27.03808324304013	18.636323778396243	20.5969752566542	17.578237132309734
CDC45	16.69627253285415	15.49520830939762	16.02404277065304	12.422289023115235	12.039276775987096	11.86493642549901
ORC5	5.34406489945408	6.146361381894174	5.450950711197496	4.295384982808178	4.193127806408444	4.558120477511191
RFC5	6.894579369461903	7.146728327150125	7.235555323882181	5.412740648641306	5.555254166472755	5.480336752320203
POLA2	8.164908735542308	7.988714397494506	8.450133848493227	6.24165891589584	6.3492616869964005	6.574924936327026
RPA2	33.72152724665198	34.862710825649145	34.49643856415036	28.10000799775895	27.96144917385325	24.857930535900913
RPA3	25.053311650916882	25.403805948831746	24.33552717241256	19.095889064392892	19.970218832848722	20.34540405813648
MCM2	47.173846360986175	46.781682691085976	45.16730167794749	39.706994195719204	40.10807450836403	30.70793891058804
CDK2	38.11021380188248	37.02222919360828	40.00233560235851	30.45209700655518	30.491133342967746	32.27632004583815
RFC4	19.28568827143869	23.29583900375547	21.35718867218325	15.016576277226969	15.184188956562101	21.391206865976546
POLD3	8.710272971321015	9.164494997321198	8.659270697130841	6.645489746129735	7.176036400156419	7.792321902520124
ORC1	7.9608610123537185	7.307048617684064	7.057778989499228	5.9594971237253915	6.677887022816168	5.676761638359058
POLE2	4.3419384711429885	4.877671008187639	4.759694252182284	3.741235508484705	4.0129638705721415	3.743087629970144
POLD2	78.30809179154527	68.9751451420984	70.31819470656735	63.10618556790187	65.59954755327014	50.50292920329064
POLD1	25.468447961302537	21.61232660220085	23.92633890097145	20.90683873075364	21.165907782318442	16.91761598120156
RPA1	42.2071128461772	42.985067536897375	42.88681875000015	35.191322742422685	35.57501966452199	35.752262902912776
CDC6	13.071757088811351	14.453452161648357	14.306327995049157	11.347823927203725	11.662850230102476	12.391865485739785
UBC	442.107031939594	448.6088960965473	454.3967619453684	400.0069558189911	403.9642498818897	348.23699230563625
POLD4	38.10784567823917	33.93242414024353	36.59904047706674	32.878287112767225	32.19403560388764	28.08110757790093
RFC3	2.653323273469381	2.9339447249325645	3.0708674549237465	2.303541607851067	1.8959550661526008	3.1245546778682565
GMNN	6.631498713731654	7.643060712893249	7.264892983454976	6.483701885643597	5.496923146740817	6.625773478062301
RFC2	46.17361620424091	48.37476164928064	45.784038408369206	40.91302878778926	43.43750693895373	37.63762728185344
MCM6	21.600571176451687	24.31903194658661	23.90448725329429	20.380220382023644	19.50053978558684	20.910069363219367
DBF4	6.398394569046812	6.285286135609852	6.1312703138395905	4.2295022168083936	4.784232373494766	6.998897823328371
MCM7	134.13055254648745	124.56680671053749	126.40555898310501	119.34067452282669	114.1122071590938	103.41995850409043
POLE	10.821686687074441	10.79733690581266	10.11305620598118	9.268275136455562	9.603713432822307	9.046806622091712
UBA52	121.7287111574003	121.45179972284271	124.73427423723084	104.87670169138578	112.95225235742936	106.77760022790191
MCM10	5.307699471811644	5.374593925838448	4.443162210212204	4.4589696067171	4.135714683950156	4.750521137747168
MCM5	30.555185836276802	28.55766463659076	29.108443821781922	28.78719420816689	28.548037912778145	22.87154963858673
RPA4	0.06385990490542609	0.031874691969563704	0.015890775373648202	0.0313592086487436	0.0475638476906032	1e-08
ORC2	8.225120774665898	8.817680830841464	7.7017801986159515	7.534895590337316	6.982722778087504	8.812346968173465
ORC3	6.564534318202722	8.08840558560423	6.789145531901037	6.160495758268633	6.052491557410322	8.347340592735273
MCM4	26.514848475854667	26.67128128772049	27.216339789684593	26.89565431876405	25.698133589643966	26.241353504041662
PCNA	144.25169699590452	159.8896931268899	153.59270954802818	141.35848066659202	150.27316841061926	159.7950186550005
MCM3	31.760917599875842	32.991419515312955	31.882738687173312	36.35253380903511	33.43776914840223	32.12576537132603
CDC7	3.2558788623089066	3.566825627341169	3.2828324899075016	3.301500703053642	3.1983787278253972	5.241446867197398
ORC4	3.0623098456626088	3.769599114121928	3.453064692053641	3.3510930521890483	3.813831833537736	5.3857275175507535
RFC1	5.513594411309245	6.611976659442751	5.908558183354704	7.440053223343797	6.142852146738169	9.796832183760456
POLA1	1.5890173021031697	1.8170943164717532	1.4772596319967588	2.0280054465263317	1.9892292792798976	2.516823456746256
