# Supplementary material for: Peptide-based Self-adaptive Implant Coating Sequentially Regulates Bone Regeneration to Enhance Interfacial Osseointegration
Source: Research Square preprint supplement (doi:10.21203/rs.3.rs-5132912/v1), 2024-10-01
Supplement: Supplementary file 993 [file 519_IL6 signaling pathway(WP364).heatmap-data.xls]

id	S1	S2	S3	C1	C2	C3
VAV1	0.0171939064536528	0.0085820783245632	1e-08	1e-08	1e-08	1e-08
IL6R	3.008851797610129	2.9513417124260264	3.102889835356637	2.657356356502255	2.415714080537024	2.3660490208338985
PRKCD	19.60026341700598	17.568479056795795	18.687053637409107	17.370156133975346	17.38264130478525	14.031354754867516
MAPK3	30.186267577415766	26.628496525245662	27.505156891234012	24.884646538597426	26.651225419674017	23.00576305345838
IRF1	16.61054897645088	16.317158633713333	16.78331896144207	15.820320444274602	15.88605533458478	12.33271920753252
MAP2K1	14.121196843096401	13.305742186958467	14.703191681694168	12.67297735528665	12.38579066697985	13.273361972532285
AKT1	67.67043383133128	64.8892333532084	64.81635966735655	65.56075740873789	65.7100648560409	52.27819116318971
BCL2L1	116.62770732888362	109.89823779202197	112.1586175621722	111.8795790371827	108.3209933546936	96.18602656502901
JUNB	25.368081540299766	21.37066793116753	25.15534210083556	23.992357402407666	23.989848200397148	19.68709518770954
NR2F6	24.2469294730422	22.16006006565074	23.364426399246238	22.407285745275612	23.643398908355422	19.98336313656203
GRB2	44.03523148232001	41.60420222658865	42.914097017962696	44.33920500686435	43.42100273303917	37.794321249319324
HDAC1	88.19942615121153	91.37697713838847	92.53724488176043	88.17790377382121	94.07712505372992	83.76201223157923
SOCS3	4.75730240373284	5.962719080670008	6.129439767354437	5.4596287298226605	5.89677179415374	5.164307996984078
SHC1	223.7971103641272	211.02093173346086	226.8964903905956	236.1292775941485	232.72289783248192	206.48315588122207
TIMP1	184.4159989599184	176.8717618835437	184.0839431605196	188.6263464025295	194.17103531363392	174.02153242353486
RAC1	192.4323195868288	188.0851426165568	182.69490714426672	194.4098013032829	203.11326733492766	192.39594326859694
PIK3R2	25.85651846281309	21.71386627392937	22.98954558559088	27.34254230518675	27.697450458555195	22.11812463690845
TYK2	12.80481184193634	11.091406054730474	11.22566151302966	14.215632631386784	13.063548644611952	11.260765002185396
BAD	28.323741632759578	28.68096384496632	27.17944047163405	34.47206028931749	34.14959197282853	24.146817111650286
MAPK1	24.737439319196145	24.363453272320648	24.854819038726852	26.640312239483784	26.39671756274589	29.39665383183318
PTPN11	19.315152874329065	19.30498989281096	16.90533535443934	19.58034906989315	19.01574187679634	26.60377416197198
IL6	68.41040791012442	72.96230289906282	75.0409597765699	85.19108955574318	85.51981125502422	85.1271801523523
JAK1	51.21529053553064	52.93195836654869	50.75836866253628	60.90803924495447	60.50497237921918	65.76809839475429
GSK3B	9.121083688666296	10.469493661390802	8.645458512899884	10.548489745137926	10.63444777081141	12.949070128013375
MAP2K2	43.77814888644871	38.948064723045825	40.82335838002566	52.937431501723964	55.43871140538867	41.31867796815921
STAT3	43.36917093877085	38.82163495603324	42.0722056659596	52.499067564016755	52.24474703750722	47.25033761233117
NLK	4.069182683402841	4.139047576441444	4.587050865101927	4.457309730197132	5.056533530966156	6.154811171744293
JAK2	0.5811797786646756	0.6752305833512866	0.535991231251703	0.7320316135262432	0.5999878795104704	1.333577458749883
MAP2K4	5.311212618145938	4.822120501823402	4.888738544300416	5.301600719230394	5.907207424020872	7.750373106472592
MAP3K7	8.901955876966003	9.67981053768756	8.28489056769084	10.629704469578995	9.989174323050761	16.06847530482123
STAT1	21.103180941710423	23.60795978891389	21.195401928251844	26.633101223433556	28.14018109633531	31.185156513411844
CREBBP	6.002527795994773	6.323460720774111	5.794236162760662	8.129802151010177	7.910459202141568	7.653098678401292
NCOA1	1.6698631397598254	1.5467736991642516	1.2174024625949142	1.9667723466265492	1.6929337545703766	2.301543172018312
PIK3R1	1.0647512721566739	1.315736078018312	1.2681612462317517	1.5660400579085167	1.5527221577081847	2.1124587807760267
RPS6KB1	4.136225711824949	4.112332780207527	3.8416988251174238	5.165323845984381	5.277080948865244	7.554113322289154
SOS1	2.080211476712667	2.6011998682049398	2.1545563909334815	3.551231269245069	3.2204259374674096	5.888567067593386
GAB1	0.206160719237108	0.2595415684976299	0.2143225516777906	0.3914527982830528	0.3946847132831661	0.6292137459801109
IL6ST	8.443611199721742	11.48711123195535	9.852449685113625	25.03710402451431	23.57736237489961	46.60254850339923
PRDM1	0.1301777002562499	0.1447196993414977	0.1325174404146004	0.462006165430885	0.5259256469970717	0.6446945664313591
