# Supplementary material for: Peptide-based Self-adaptive Implant Coating Sequentially Regulates Bone Regeneration to Enhance Interfacial Osseointegration
Source: Research Square preprint supplement (doi:10.21203/rs.3.rs-5132912/v1), 2024-10-01
Supplement: Supplementary file 997 [file 520_SREBF and miR33 in cholesterol and lipid homeostasis(WP2011).heatmap-data.xls]

id	S1	S2	S3	C1	C2	C3
SIRT6	8.831036161647626	9.444511941529653	8.515708796535884	7.165362112206088	6.919561054852141	5.946902798171777
PPARGC1A	1e-08	0.032094139005498803	0.051200548346763304	0.016840061597948403	0.0085140188120873	0.0065780793510935
NR1H3	9.246092818777258	6.74039420207042	8.286263455781517	7.3824324343919585	7.568392382792287	6.23196712649854
MTOR	17.43791000989527	16.22195775425965	16.96361593003945	19.06882769177519	18.02720080985493	18.310245752362093
MED15	16.497679483828232	14.926720914477157	15.526284341073076	18.110244048885416	18.58485085589148	16.253561731436417
SIRT1	6.860024757265882	6.060557940991199	5.374513196585053	6.402180152016035	6.506980923628873	7.968286902586821
PPARA	2.991025324125015	2.880154605042756	2.7861123795234266	3.5289721990945604	3.441311699505588	3.4367727671910786
HMGCR	9.279629116810494	10.23478783860901	9.501940356803255	11.194543689439682	11.917839650262986	12.428807466862892
PRKAA1	12.26893654648324	14.397949852999803	12.624766207861057	15.26929548762509	16.035927266225933	21.879603658568612
HMGCS1	6.020016333857907	6.779564218695173	7.343216685328428	9.574995715100453	8.30312296739834	10.640602690067572
SREBF2	21.873194662302673	21.21224727963821	20.7089185659623	31.35404513390411	31.82256542408833	29.35569600094828
FASN	20.359860959182072	20.021529819178816	19.50099229920212	32.491232279171186	33.41924109205174	23.6094164957962
LDLR	8.695818097400482	9.54549950435953	8.402929254008493	14.89043702556333	15.97391822841297	13.792178861319114
ABCA1	0.8207665493446245	1.144217792231785	1.0289301215112439	1.5322861422833474	1.4780983634443416	2.068582035091347
SREBF1	12.023439427506279	12.388747139602161	12.540341966117913	24.61305104943269	23.267004279090468	20.754813795517602
SCD	42.0660773211909	41.021530659455074	42.366810393724926	80.03070777904676	81.22579489936763	82.27621724329224
