# Supplementary material for: Peptide-based Self-adaptive Implant Coating Sequentially Regulates Bone Regeneration to Enhance Interfacial Osseointegration
Source: Research Square preprint supplement (doi:10.21203/rs.3.rs-5132912/v1), 2024-10-01
Supplement: Supplementary file 1005 [file 522_Statin inhibition of cholesterol production(WP430).heatmap-data.xls]

id	S1	S2	S3	C1	C2	C3
PDIA2	0.059087457243454704	0.117970363196962	1e-08	0.0145078243214828	1e-08	0.0151121424356873
APOA2	1e-08	1e-08	0.0522987314828929	1e-08	1e-08	1e-08
ACSS1	7.435930270764519	7.585517439157911	8.186360023450396	7.8931552325910435	7.664244838777876	5.859094151043117
DGAT1	8.411530024020319	8.35830502848857	8.012603352837068	8.565499323652958	7.7315277167213825	7.759950751762179
APOE	0.1941594353325854	0.26430460180999027	0.4392203144452739	0.5027250797622834	0.3856345267827789	0.10834468166506979
MTTP	1e-08	0.0061494663285332	1e-08	1e-08	0.0122350807885796	1e-08
SCARB1	6.685297311700148	5.696679405697172	5.9772422536545085	6.489766675296176	7.215679187894177	6.250967170670217
PLTP	0.8033986878424576	0.7649923772695308	1.3778831494956927	1.2503216077370056	1.190630269609939	0.9104178663935296
LRP1	14.850089435632096	16.20053192906385	15.500348562861916	18.320135061374806	19.230668678264824	14.14042324147918
SOAT1	7.683315159223044	7.805709070626782	7.360097773238013	7.832996407640755	7.670699095384826	10.25558918933938
APOC1	3.6572189912949735	3.711234218931977	3.640219514769227	4.363647724884647	3.872065825880661	4.45265044842952
FDFT1	13.763175788438724	12.946129768238112	13.191605379467136	17.17453713281266	15.428802978970912	14.601925265897952
HMGCR	9.279629116810494	10.23478783860901	9.501940356803255	11.194543689439682	11.917839650262986	12.428807466862892
LCAT	3.163113788403793	2.310062188569589	2.7341464051718303	3.2700768744411848	3.9513594673450334	3.3381650074381737
SQLE	13.22408444174311	13.55777975064577	12.981062956182912	17.13779728679648	16.46867037840588	17.960518078957648
LDLR	8.695818097400482	9.54549950435953	8.402929254008493	14.89043702556333	15.97391822841297	13.792178861319114
ABCA1	0.8207665493446245	1.144217792231785	1.0289301215112439	1.5322861422833474	1.4780983634443416	2.068582035091347
LIPC	0.22202618326967968	0.3495122093439567	0.250743374476356	0.7841681421628239	0.530027345828769	0.7294706482405298
APOA1	1e-08	1e-08	1e-08	0.0187578128727147	0.0189671845391976	0.019539162827123403
