# Supplementary material for: Peptide-based Self-adaptive Implant Coating Sequentially Regulates Bone Regeneration to Enhance Interfacial Osseointegration
Source: Research Square preprint supplement (doi:10.21203/rs.3.rs-5132912/v1), 2024-10-01
Supplement: Supplementary file 1009 [file 523_Cholesterol metabolism(WP5304).heatmap-data.xls]

id	S1	S2	S3	C1	C2	C3
NPC1	15.503402819047317	14.997809382087153	16.028040516456173	11.405807717511628	12.19460982197274	10.943932288745572
OSBPL5	11.111342859374252	10.68950170675797	10.288403189580599	9.568663789829538	8.707920949644283	6.522749425611804
VDAC1	176.68281256827518	179.14782918872524	185.85235127006945	145.3980420973357	139.06145742601024	137.1906799871411
APOA2	1e-08	1e-08	0.0522987314828929	1e-08	1e-08	1e-08
STAR	1e-08	1e-08	0.0386582462306296	1e-08	1e-08	1e-08
CD36	0.0042341750821346	1e-08	1e-08	1e-08	1e-08	1e-08
NPC2	115.00213149725916	121.99009509144048	122.91935606624506	97.99294154685627	101.9431851903026	95.04427678437952
STARD3	16.39006229548493	15.255868974216272	16.426387550856845	14.787119387351915	13.85956982832331	12.60461586281095
VAPA	15.114370615686527	16.634386234926335	17.084545118407554	13.949394266516538	14.079243964185824	15.72883933963655
LBR	19.03313711518709	19.74060577936343	19.294363799639505	15.209562442847677	16.342960200995183	22.734893721817546
TSPO	99.7322250260462	93.23344477097407	104.89262366002744	101.21376662382501	104.43393801123979	75.30375593703019
LDLRAP1	5.559301794109032	5.6668437988019	5.603554163531343	5.994010835603407	5.672394853654724	4.582707880424351
DGAT1	8.411530024020319	8.35830502848857	8.012603352837068	8.565499323652958	7.7315277167213825	7.759950751762179
LIPA	26.241667900192695	28.060721759208132	29.339927372242183	28.075092558648073	26.890656662315315	26.85414080309225
LRPAP1	9.355602993674891	8.865775279248284	8.965641027361976	9.81123235001762	10.24748905393682	6.910029076326801
PMVK	35.44298945645652	32.8391337150363	33.43982702205004	37.6545394272924	37.61144811856632	26.732123589351
CYP27A1	0.7658209237857294	0.4630042686657294	0.6763726479047855	0.6250109765721887	0.706968788493505	0.6289762557056858
SAR1B	3.6179575278788425	4.091256657738946	3.88131226862327	3.346871446254704	3.7271241207766246	4.8454743577471335
APOE	0.1941594353325854	0.26430460180999027	0.4392203144452739	0.5027250797622834	0.3856345267827789	0.10834468166506979
CYP51A1	29.564241850956932	30.562525317615993	33.44675557209714	32.259501920283974	30.88457343956437	35.398323100207364
CIDEB	0.018303801533402303	1e-08	0.024291625857806202	0.029961027817271002	1e-08	0.0249672371303958
TM7SF2	14.583366124144076	14.211502701068628	15.033993319015806	16.694301921827382	15.924541663168252	13.86977725408283
SLC27A4	19.478450546801362	18.16325628565643	19.571537481677737	21.810322670201224	21.427802493553123	18.14203104275139
MTTP	1e-08	0.0061494663285332	1e-08	1e-08	0.0122350807885796	1e-08
MGAT1	10.832921721815813	10.34988634345453	10.399850014101006	12.382723316314676	12.166528047615227	9.560828835754208
NSDHL	16.47549463531996	17.481452516841824	17.013148194611677	18.010647761277045	20.293014631993692	16.974125200911974
SCARB1	6.685297311700148	5.696679405697172	5.9772422536545085	6.489766675296176	7.215679187894177	6.250967170670217
FDPS	60.67931110379367	60.135022802826136	58.601549036693484	69.79360873406785	70.19391614199577	56.33001976605403
PLTP	0.8033986878424576	0.7649923772695308	1.3778831494956927	1.2503216077370056	1.190630269609939	0.9104178663935296
EBP	54.34902790084465	56.1334399371998	57.776280386125244	60.574264365210574	64.81196501105522	59.994682191440965
LRP1	14.850089435632096	16.20053192906385	15.500348562861916	18.320135061374806	19.230668678264824	14.14042324147918
SOAT1	7.683315159223044	7.805709070626782	7.360097773238013	7.832996407640755	7.670699095384826	10.25558918933938
APOC1	3.6572189912949735	3.711234218931977	3.640219514769227	4.363647724884647	3.872065825880661	4.45265044842952
SC5D	3.1690055841869342	3.36014336588202	3.637394184300809	3.4923368085349926	3.4824171844550684	5.109484335226362
FDFT1	13.763175788438724	12.946129768238112	13.191605379467136	17.17453713281266	15.428802978970912	14.601925265897952
MVK	1.9637806371937618	1.5856028120573817	1.6154628831893425	2.0421296437122503	2.3574544142754457	1.9262922232239024
HMGCR	9.279629116810494	10.23478783860901	9.501940356803255	11.194543689439682	11.917839650262986	12.428807466862892
ACAT2	28.051011177436187	26.527927254455076	27.92062453438769	36.84473360524055	33.49371793828904	31.80334579054429
MVD	40.384571025702314	37.97374566218153	38.7366150973658	50.9397892064889	52.49494577138415	41.728452800758284
HSD17B7	4.5579362946124835	4.408301237010708	4.607415995417647	6.010453488754076	5.104570595449916	5.7233453822395415
SORT1	23.950451415144826	22.87190556295233	22.64716873547141	28.077116024596037	28.78280463002514	29.69215248645493
ABCB11	1e-08	1e-08	1e-08	0.0032003469025278	1e-08	1e-08
NPC1L1	1e-08	1e-08	1e-08	0.0045330298194996	1e-08	1e-08
LCAT	3.163113788403793	2.310062188569589	2.7341464051718303	3.2700768744411848	3.9513594673450334	3.3381650074381737
SQLE	13.22408444174311	13.55777975064577	12.981062956182912	17.13779728679648	16.46867037840588	17.960518078957648
LIPG	0.0573660476517775	0.0127259536629891	0.0338366849467889	0.07094745481868979	0.0464195888415373	0.0543402575826841
MSMO1	7.061170705707079	7.926197389430256	6.390343664369231	9.148450664364502	7.874786653636444	12.258291864351756
LSS	18.72616971037612	19.45181370106333	19.108439532882304	27.96493099152992	27.90247515678808	20.970206931787494
HMGCS1	6.020016333857907	6.779564218695173	7.343216685328428	9.574995715100453	8.30312296739834	10.640602690067572
PCSK9	1e-08	1e-08	0.006815955554823	0.08070446404240869	0.0408026422778889	1e-08
MYLIP	1.4800633489873027	1.400145498631927	1.3729146736448798	2.412531266343609	2.2239867953590085	1.87882269292372
IDI1	3.245940339685257	3.960393738229792	3.443875813161056	5.095221048246382	5.470901009803949	6.426528117767623
DHCR24	72.23907347162071	66.58713683999687	69.39095184162734	114.18793223497103	112.8097820634108	106.44863992093107
LDLR	8.695818097400482	9.54549950435953	8.402929254008493	14.89043702556333	15.97391822841297	13.792178861319114
ABCA1	0.8207665493446245	1.144217792231785	1.0289301215112439	1.5322861422833474	1.4780983634443416	2.068582035091347
DHCR7	28.269972899209026	24.934290343757066	26.576312284305732	47.52060066572315	47.388121965563705	45.82723237258648
LIPC	0.22202618326967968	0.3495122093439567	0.250743374476356	0.7841681421628239	0.530027345828769	0.7294706482405298
APOA1	1e-08	1e-08	1e-08	0.0187578128727147	0.0189671845391976	0.019539162827123403
