# Supplementary material for: Peptide-based Self-adaptive Implant Coating Sequentially Regulates Bone Regeneration to Enhance Interfacial Osseointegration
Source: Research Square preprint supplement (doi:10.21203/rs.3.rs-5132912/v1), 2024-10-01
Supplement: Supplementary file 1013 [file 524_Pregnane X receptor pathway(WP2876).heatmap-data.xls]

id	S1	S2	S3	C1	C2	C3
NR1I2	1e-08	0.0337687732410998	1e-08	1e-08	1e-08	1e-08
PPARGC1A	1e-08	0.032094139005498803	0.051200548346763304	0.016840061597948403	0.0085140188120873	0.0065780793510935
DNAJC7	38.35539272356337	45.28684793050975	42.272781328193524	37.89368064719813	39.18824859770324	39.64704256118278
PSMC5	101.95819795534183	103.43720192156975	100.23879408125524	99.89878957464731	96.83674888110612	90.25631449971023
SRPX2	0.0224845351397377	0.033668422191745	1e-08	0.0441652371068674	1e-08	0.0038337528959627998
HSP90AA1	168.1159154199381	218.43309286558292	185.98174191972402	164.42776654863044	156.91357148038608	238.58072486143644
ABCB1	0.0347536943022727	0.0043367014244304	0.0043240277887478	0.0127996829178545	0.0301992720257798	0.0044442896592654
SRC	18.695711869711882	16.67799092013365	17.95370442273358	18.263160123851442	19.61320624820945	16.818518503451376
RXRA	9.65808036854049	8.54714017012854	8.995052302742804	9.888723141876484	10.039540777101736	8.026648848063408
ABCC2	0.1946531655940796	0.11931700132991789	0.0407891403708618	0.1576344844910109	0.2170471124740539	0.12926437934088159
CYP2C19	1e-08	1e-08	1e-08	1e-08	0.0059872275258082	1e-08
NCOA1	1.6698631397598254	1.5467736991642516	1.2174024625949142	1.9667723466265492	1.6929337545703766	2.301543172018312
NRIP1	0.9047064803977884	1.2051461878450758	0.9836685356977909	1.3073346727789528	1.4592699956024962	2.470088895949185
NCOA2	1.5995892370582854	1.5206519966917447	1.3846586596270025	1.9095502943684355	1.982281948437636	2.8533085154765896
ABCC3	25.79882481730869	24.74218587964794	25.084606408348233	39.508371581141404	40.10719301152929	37.6165424820645
ABCC4	7.3273292617718475	7.993908993300314	7.09259570811536	10.81309277958514	11.659577545782534	13.96417235463738
FOXO1	1.13898603431302	1.127656491911847	1.0987013147842088	1.7953266739593154	1.8944971604355447	2.0954826787175342
CYP3A5	0.1349453815451713	0.261499392915242	0.102713865546641	0.4053957381890177	0.3429144350395044	0.41822195334925877
NCOA3	8.318408620437632	7.6879770509833385	6.9799257341278125	12.650970232988477	12.52599708040584	15.617120870169517
