# Supplementary material for: Peptide-based Self-adaptive Implant Coating Sequentially Regulates Bone Regeneration to Enhance Interfacial Osseointegration
Source: Research Square preprint supplement (doi:10.21203/rs.3.rs-5132912/v1), 2024-10-01
Supplement: Supplementary file 1017 [file 525_Cholesterol synthesis disorders(WP5193).heatmap-data.xls]

id	S1	S2	S3	C1	C2	C3
LBR	19.03313711518709	19.74060577936343	19.294363799639505	15.209562442847677	16.342960200995183	22.734893721817546
PMVK	35.44298945645652	32.8391337150363	33.43982702205004	37.6545394272924	37.61144811856632	26.732123589351
CYP51A1	29.564241850956932	30.562525317615993	33.44675557209714	32.259501920283974	30.88457343956437	35.398323100207364
FDPS	60.67931110379367	60.135022802826136	58.601549036693484	69.79360873406785	70.19391614199577	56.33001976605403
EBP	54.34902790084465	56.1334399371998	57.776280386125244	60.574264365210574	64.81196501105522	59.994682191440965
SC5D	3.1690055841869342	3.36014336588202	3.637394184300809	3.4923368085349926	3.4824171844550684	5.109484335226362
FDFT1	13.763175788438724	12.946129768238112	13.191605379467136	17.17453713281266	15.428802978970912	14.601925265897952
MVK	1.9637806371937618	1.5856028120573817	1.6154628831893425	2.0421296437122503	2.3574544142754457	1.9262922232239024
HMGCR	9.279629116810494	10.23478783860901	9.501940356803255	11.194543689439682	11.917839650262986	12.428807466862892
MVD	40.384571025702314	37.97374566218153	38.7366150973658	50.9397892064889	52.49494577138415	41.728452800758284
SQLE	13.22408444174311	13.55777975064577	12.981062956182912	17.13779728679648	16.46867037840588	17.960518078957648
MSMO1	7.061170705707079	7.926197389430256	6.390343664369231	9.148450664364502	7.874786653636444	12.258291864351756
LSS	18.72616971037612	19.45181370106333	19.108439532882304	27.96493099152992	27.90247515678808	20.970206931787494
HMGCS1	6.020016333857907	6.779564218695173	7.343216685328428	9.574995715100453	8.30312296739834	10.640602690067572
IDI1	3.245940339685257	3.960393738229792	3.443875813161056	5.095221048246382	5.470901009803949	6.426528117767623
DHCR24	72.23907347162071	66.58713683999687	69.39095184162734	114.18793223497103	112.8097820634108	106.44863992093107
DHCR7	28.269972899209026	24.934290343757066	26.576312284305732	47.52060066572315	47.388121965563705	45.82723237258648
