# Supplementary material for: Peptide-based Self-adaptive Implant Coating Sequentially Regulates Bone Regeneration to Enhance Interfacial Osseointegration
Source: Research Square preprint supplement (doi:10.21203/rs.3.rs-5132912/v1), 2024-10-01
Supplement: Supplementary file 1021 [file 526_Cholesterol metabolism with Bloch and Kandutsch-Russell p...(WP4718).heatmap-data.xls]

id	S1	S2	S3	C1	C2	C3
ELOVL3	1.0173438188625619	0.9569916399110194	0.9541949080060267	0.5187939797898993	0.6314445166545127	0.5303966832867844
ACSL1	7.982282062739182	7.989729464821125	8.660721961687905	6.971437513323657	7.519906818197487	6.989443656069688
NR1H3	9.246092818777258	6.74039420207042	8.286263455781517	7.3824324343919585	7.568392382792287	6.23196712649854
ABCG1	0.0238453358894836	0.0584281414543487	0.0431536247321634	0.0298061244785691	0.0301388156739134	0.0487892184867713
LBR	19.03313711518709	19.74060577936343	19.294363799639505	15.209562442847677	16.342960200995183	22.734893721817546
ELOVL5	36.75165300621799	39.28998329587296	37.6345652092078	34.508785970971005	33.343568249752124	40.072789142440655
CYP46A1	0.0181459910660227	0.0271718700396281	0.036123279920424405	0.0089108205449982	0.0540616397248386	0.0092819973539413
ELOVL4	1.5622678007331425	1.7163453145941014	1.793604884965249	1.6885882571862505	1.198488744640092	1.995704307255316
PMVK	35.44298945645652	32.8391337150363	33.43982702205004	37.6545394272924	37.61144811856632	26.732123589351
CYP27A1	0.7658209237857294	0.4630042686657294	0.6763726479047855	0.6250109765721887	0.706968788493505	0.6289762557056858
CYP51A1	29.564241850956932	30.562525317615993	33.44675557209714	32.259501920283974	30.88457343956437	35.398323100207364
TM7SF2	14.583366124144076	14.211502701068628	15.033993319015806	16.694301921827382	15.924541663168252	13.86977725408283
NSDHL	16.47549463531996	17.481452516841824	17.013148194611677	18.010647761277045	20.293014631993692	16.974125200911974
FDPS	60.67931110379367	60.135022802826136	58.601549036693484	69.79360873406785	70.19391614199577	56.33001976605403
EBP	54.34902790084465	56.1334399371998	57.776280386125244	60.574264365210574	64.81196501105522	59.994682191440965
NR1H2	35.822070610405106	30.583862905100986	34.290903607194785	39.56554789453907	39.25985312365935	33.177610908818636
SOAT2	0.0360424977179684	1e-08	1e-08	1e-08	0.023862234408213803	0.0491636477936689
SOAT1	7.683315159223044	7.805709070626782	7.360097773238013	7.832996407640755	7.670699095384826	10.25558918933938
ACSL3	7.649790217901742	9.46878665382566	7.6897969600451646	8.144619854855526	8.519359656027861	12.45855905007055
SC5D	3.1690055841869342	3.36014336588202	3.637394184300809	3.4923368085349926	3.4824171844550684	5.109484335226362
FDFT1	13.763175788438724	12.946129768238112	13.191605379467136	17.17453713281266	15.428802978970912	14.601925265897952
FADS1	31.064512991785964	28.55244305065065	29.3260733145787	36.224328684737934	36.62865898468388	33.93466778651813
ACOT2	12.786759818943397	11.155971026112345	13.092452592231894	16.12235624743458	16.14618398606527	12.344139893708567
ACSL4	10.29993725611364	12.415002598145271	10.610332064934004	11.82445738153351	11.741050060941125	17.94439303283648
MVK	1.9637806371937618	1.5856028120573817	1.6154628831893425	2.0421296437122503	2.3574544142754457	1.9262922232239024
HMGCR	9.279629116810494	10.23478783860901	9.501940356803255	11.194543689439682	11.917839650262986	12.428807466862892
ACAT2	28.051011177436187	26.527927254455076	27.92062453438769	36.84473360524055	33.49371793828904	31.80334579054429
MVD	40.384571025702314	37.97374566218153	38.7366150973658	50.9397892064889	52.49494577138415	41.728452800758284
HSD17B7	4.5579362946124835	4.408301237010708	4.607415995417647	6.010453488754076	5.104570595449916	5.7233453822395415
SQLE	13.22408444174311	13.55777975064577	12.981062956182912	17.13779728679648	16.46867037840588	17.960518078957648
MSMO1	7.061170705707079	7.926197389430256	6.390343664369231	9.148450664364502	7.874786653636444	12.258291864351756
LSS	18.72616971037612	19.45181370106333	19.108439532882304	27.96493099152992	27.90247515678808	20.970206931787494
GGPS1	4.568438645542021	5.154241165847593	4.961062034893919	6.197749325358845	6.162391728375957	8.372766487306567
HMGCS1	6.020016333857907	6.779564218695173	7.343216685328428	9.574995715100453	8.30312296739834	10.640602690067572
SREBF2	21.873194662302673	21.21224727963821	20.7089185659623	31.35404513390411	31.82256542408833	29.35569600094828
FASN	20.359860959182072	20.021529819178816	19.50099229920212	32.491232279171186	33.41924109205174	23.6094164957962
FADS2	4.328044268067331	4.008474659695435	4.584519064576544	6.659171766573384	7.181940489407905	5.685702723878699
MYLIP	1.4800633489873027	1.400145498631927	1.3729146736448798	2.412531266343609	2.2239867953590085	1.87882269292372
IDI1	3.245940339685257	3.960393738229792	3.443875813161056	5.095221048246382	5.470901009803949	6.426528117767623
DHCR24	72.23907347162071	66.58713683999687	69.39095184162734	114.18793223497103	112.8097820634108	106.44863992093107
ABCA1	0.8207665493446245	1.144217792231785	1.0289301215112439	1.5322861422833474	1.4780983634443416	2.068582035091347
DHCR7	28.269972899209026	24.934290343757066	26.576312284305732	47.52060066572315	47.388121965563705	45.82723237258648
SREBF1	12.023439427506279	12.388747139602161	12.540341966117913	24.61305104943269	23.267004279090468	20.754813795517602
SCD	42.0660773211909	41.021530659455074	42.366810393724926	80.03070777904676	81.22579489936763	82.27621724329224
