# Supplementary material for: Peptide-based Self-adaptive Implant Coating Sequentially Regulates Bone Regeneration to Enhance Interfacial Osseointegration
Source: Research Square preprint supplement (doi:10.21203/rs.3.rs-5132912/v1), 2024-10-01
Supplement: Supplementary file 1025 [file 527_Enterocyte cholesterol metabolism(WP5333).heatmap-data.xls]

id	S1	S2	S3	C1	C2	C3
CD36	0.0042341750821346	1e-08	1e-08	1e-08	1e-08	1e-08
LBR	19.03313711518709	19.74060577936343	19.294363799639505	15.209562442847677	16.342960200995183	22.734893721817546
DGAT1	8.411530024020319	8.35830502848857	8.012603352837068	8.565499323652958	7.7315277167213825	7.759950751762179
PMVK	35.44298945645652	32.8391337150363	33.43982702205004	37.6545394272924	37.61144811856632	26.732123589351
SAR1B	3.6179575278788425	4.091256657738946	3.88131226862327	3.346871446254704	3.7271241207766246	4.8454743577471335
CYP51A1	29.564241850956932	30.562525317615993	33.44675557209714	32.259501920283974	30.88457343956437	35.398323100207364
TM7SF2	14.583366124144076	14.211502701068628	15.033993319015806	16.694301921827382	15.924541663168252	13.86977725408283
SLC27A4	19.478450546801362	18.16325628565643	19.571537481677737	21.810322670201224	21.427802493553123	18.14203104275139
MTTP	1e-08	0.0061494663285332	1e-08	1e-08	0.0122350807885796	1e-08
MGAT1	10.832921721815813	10.34988634345453	10.399850014101006	12.382723316314676	12.166528047615227	9.560828835754208
NSDHL	16.47549463531996	17.481452516841824	17.013148194611677	18.010647761277045	20.293014631993692	16.974125200911974
FDPS	60.67931110379367	60.135022802826136	58.601549036693484	69.79360873406785	70.19391614199577	56.33001976605403
EBP	54.34902790084465	56.1334399371998	57.776280386125244	60.574264365210574	64.81196501105522	59.994682191440965
SC5D	3.1690055841869342	3.36014336588202	3.637394184300809	3.4923368085349926	3.4824171844550684	5.109484335226362
FDFT1	13.763175788438724	12.946129768238112	13.191605379467136	17.17453713281266	15.428802978970912	14.601925265897952
MVK	1.9637806371937618	1.5856028120573817	1.6154628831893425	2.0421296437122503	2.3574544142754457	1.9262922232239024
HMGCR	9.279629116810494	10.23478783860901	9.501940356803255	11.194543689439682	11.917839650262986	12.428807466862892
ACAT2	28.051011177436187	26.527927254455076	27.92062453438769	36.84473360524055	33.49371793828904	31.80334579054429
MVD	40.384571025702314	37.97374566218153	38.7366150973658	50.9397892064889	52.49494577138415	41.728452800758284
HSD17B7	4.5579362946124835	4.408301237010708	4.607415995417647	6.010453488754076	5.104570595449916	5.7233453822395415
NPC1L1	1e-08	1e-08	1e-08	0.0045330298194996	1e-08	1e-08
SQLE	13.22408444174311	13.55777975064577	12.981062956182912	17.13779728679648	16.46867037840588	17.960518078957648
MSMO1	7.061170705707079	7.926197389430256	6.390343664369231	9.148450664364502	7.874786653636444	12.258291864351756
LSS	18.72616971037612	19.45181370106333	19.108439532882304	27.96493099152992	27.90247515678808	20.970206931787494
HMGCS1	6.020016333857907	6.779564218695173	7.343216685328428	9.574995715100453	8.30312296739834	10.640602690067572
IDI1	3.245940339685257	3.960393738229792	3.443875813161056	5.095221048246382	5.470901009803949	6.426528117767623
DHCR24	72.23907347162071	66.58713683999687	69.39095184162734	114.18793223497103	112.8097820634108	106.44863992093107
LDLR	8.695818097400482	9.54549950435953	8.402929254008493	14.89043702556333	15.97391822841297	13.792178861319114
ABCA1	0.8207665493446245	1.144217792231785	1.0289301215112439	1.5322861422833474	1.4780983634443416	2.068582035091347
DHCR7	28.269972899209026	24.934290343757066	26.576312284305732	47.52060066572315	47.388121965563705	45.82723237258648
APOA1	1e-08	1e-08	1e-08	0.0187578128727147	0.0189671845391976	0.019539162827123403
