# Supplementary material for: Peptide-based Self-adaptive Implant Coating Sequentially Regulates Bone Regeneration to Enhance Interfacial Osseointegration
Source: Research Square preprint supplement (doi:10.21203/rs.3.rs-5132912/v1), 2024-10-01
Supplement: Supplementary file 1029 [file 528_miRNA targets in ECM and membrane receptors(WP2911).heatmap-data.xls]

id	S1	S2	S3	C1	C2	C3
COL5A1	1e-08	0.0023166566582426	0.0092395157707384	1e-08	1e-08	1e-08
ITGB5	60.82205507644223	60.49901056104875	62.30227260391504	56.22014350949679	53.46909397880343	46.52119480330781
COL6A2	59.41395844759738	57.21065156498445	58.43016870033693	52.25941153716671	54.12379314194629	45.309784100410894
TNXB	0.1182641797147757	0.1144819240888282	0.11414735980250669	0.11615020400225369	0.096092718997204	0.09715735442680419
COL6A1	19.11010774668801	20.141795832737202	20.773007387526295	21.22442495126461	20.24320554436856	15.300769827582668
COL5A3	1e-08	0.0079750707654401	0.0198793957120218	0.0039230532952718	1e-08	0.0163458353642783
LAMC1	49.15109823641468	48.260173998015354	48.64125403772383	53.66801155444585	54.341909523451825	49.01078967209474
THBS2	1e-08	1e-08	0.003550001978074	1e-08	0.0141676718067384	1e-08
LAMB2	35.85272163066848	35.925692716774776	35.97704916106363	47.84046831717729	50.03402411353289	39.60234382612465
COL3A1	1e-08	1e-08	1e-08	1e-08	0.0180205532416128	0.0046410036769706
COL4A2	62.189987393667096	62.75346557049428	64.68138089710024	95.90923391640041	98.7064003803381	72.01410306088415
SDC2	0.4051710768122612	0.3855102713400724	0.27095896812514597	0.6279811156299001	0.5092498431286753	0.4080275857635593
THBS1	48.88344186293622	51.828011909993535	50.826783410535825	72.73989374150118	76.36521004506032	73.95435639962
COL5A2	0.5456852354055244	0.4877743928250874	0.4792489270400001	0.8546874920032788	0.6517124531099696	0.7552863402763522
ITGA11	1e-08	0.025058171196523402	0.0317990127268167	0.123264589625353	0.0543885654680894	0.0583632482411785
COL4A1	8.99435601909717	9.871565511078577	9.790260307571485	16.68373716298592	16.482981854282688	15.75469896020097
ITGA1	0.2134214918560626	0.3056834354458166	0.277081909957801	0.4852847774648168	0.430803621869808	0.5007526800322321
FN1	648.6842079306692	692.4591130329909	680.8880931928622	1348.3974658506463	1359.7890207798928	1188.2794037785443
ITGB6	0.0536637872314505	0.1392843345728837	0.2563888294739885	0.4005544801352133	0.5275988818621535	0.6752690899931001
