# Supplementary material for: Peptide-based Self-adaptive Implant Coating Sequentially Regulates Bone Regeneration to Enhance Interfacial Osseointegration
Source: Research Square preprint supplement (doi:10.21203/rs.3.rs-5132912/v1), 2024-10-01
Supplement: Supplementary file 1033 [file 5_One-carbon metabolism(WP241).heatmap-data.xls]

id	S1	S2	S3	C1	C2	C3
ALDH1L1	0.8333147746050747	0.6104870381164699	0.608702938344065	0.2376055950126072	0.16017181096565788	0.22000264604160968
MTHFD2	53.72063999559893	55.0316708307385	57.96744453470982	20.233377162095206	18.503804804277046	20.54669695444343
MAT1A	0.11039610491629509	0.20571604256952508	0.16116167300934028	0.0578254826856266	0.08039751342501489	0.045175639940725
DNMT3B	4.023587168058511	3.882377580176199	4.229757946605637	2.4513004797523346	2.5961842564728395	2.476366074569333
SHMT2	73.31020444711282	65.10657003373812	68.771430644406	46.96353590635853	44.112925693503314	37.956648726626966
AMT	1.0600678698472086	0.9461848608541517	0.8192855397300067	0.6491683986525105	0.7554957193369728	0.4848293043863891
FTCD	0.035931997755622905	0.040353529824407104	1e-08	0.0088224355891866	0.00446046006296	0.0045949703762973
GLRX	7.466662904071232	9.280152287995037	8.99053442603204	7.673145558916949	6.498397530084798	4.502255312127003
GART	42.409464453803494	43.13951873691579	43.64088975615208	33.69147261926379	31.88765670897029	32.08345674599142
TYMS	121.49495870878131	118.85234389651127	121.59164942913979	105.27800701780063	102.30111643746244	90.628390659669
MTHFD1L	11.799838778230074	11.876657553977864	11.314272765786704	10.179627537365851	9.980714142323801	9.649269913563337
SHMT1	27.032441300508214	25.34232513626551	25.75613961792044	27.076042161535764	24.38419396308089	21.041744888325024
TCN2	2.5109873922530457	2.245769117381127	3.2117904712870065	3.1133160729286486	2.516196460092313	1.731924844716592
AHCY	121.77959880562172	110.55534881995133	117.12279715790767	113.43802514968345	114.84006949030568	99.59841652242828
DNMT1	28.17233115941933	26.04347951317272	26.97152872733087	27.62708005976372	27.88863263993	24.509664777432004
MTFMT	3.3590877554737584	3.9621802081897215	3.719721770109589	3.6112297019270736	3.1908296595579566	4.165944199663218
ATIC	49.45674245259114	47.47747819731818	45.75776004037328	50.141575837756136	47.699734379719246	46.09257670188343
MTHFD1	51.95065218098649	54.54875822145132	54.16141159405317	52.627377049851674	57.57486433742315	52.40413179312384
DNMT3A	1.8269944839573948	1.7890341111272041	1.9185096711162348	1.7882953625494664	1.8021470629569902	2.0935367443978086
DHFR	11.648768336369473	12.561178584583901	12.106987221853508	11.964826591148368	11.378910871240617	14.25110722820849
MTRR	9.454518463386782	8.509118931709283	8.81583226506218	8.93757136501073	9.110848070395383	9.915734264836694
MTR	5.104141206966332	6.011341202044077	5.1190995216815764	5.780532034521081	5.218950862903571	6.995419870647055
MAT2B	30.595078154360046	30.8804547860884	32.33380857407632	33.65921806973977	35.054842597279894	39.03286202633136
CHDH	0.0064739790702147	0.0290824466293654	0.0354413323046274	0.0635824767169744	0.022502267498543702	0.029803947818965403
MTHFR	2.7078621892142185	2.7495817686997484	2.7646817467760205	3.5725780585787588	3.508582120186915	3.25770469899668
MTHFS	0.20532036460112268	0.4099299677289324	0.1737110972667565	0.4234655284389294	0.4281921844281841	0.3045723938872625
AHCYL2	4.24659567864258	4.203621608705895	3.8070771632927967	5.461083748111031	5.022671879091862	5.253789839183093
