# Supplementary material for: Peptide-based Self-adaptive Implant Coating Sequentially Regulates Bone Regeneration to Enhance Interfacial Osseointegration
Source: Research Square preprint supplement (doi:10.21203/rs.3.rs-5132912/v1), 2024-10-01
Supplement: Supplementary file 1041 [file 7_Hypertrophy model(WP516).heatmap-data.xls]

id	S1	S2	S3	C1	C2	C3
EIF4EBP1	103.83757906347591	101.58349371329103	115.37502690256163	45.459841475577804	43.724222459702794	35.24551300617273
ATF3	5.9786765630439405	4.771192810049847	5.293521125676711	1.9714935244908007	2.1402067471180017	2.124736302215622
HBEGF	8.692582905587201	8.951675961604975	8.978080273523807	3.993709659795473	3.671169840233159	4.678723902741452
NR4A3	0.10053667639481749	0.09690188280279409	0.1035200294163053	0.0340481377088252	0.030985360834078903	0.060292874681468704
VEGFA	52.8221932172177	53.90969328907113	55.16925447982757	29.466907288227016	29.70459398691235	30.768174254897772
ANKRD1	0.9739525971051021	0.9722668454961912	1.274102047109495	0.3416225651120121	0.4974274075240741	0.7401736831293766
IFRD1	27.263299843795444	32.07367861285443	32.70831914262448	17.230233742693688	16.45981124497018	22.8684439060817
CCN1	120.0005357992727	117.02066079164048	118.16953515495884	90.57136773154487	92.26632845656191	81.30256931556168
IL1A	0.035528339547954604	0.2482678610040203	0.3064809627128734	0.1279419616910226	0.035282742666353305	0.0121155855047878
WDR1	138.54914006615894	128.56716960880354	131.31618102114516	117.80927709984144	119.23971362041733	95.5008598967568
IL18	13.929750592227753	16.01516489361667	14.787904992001804	11.605347083955841	13.36234984017051	14.757998266895767
IL1R1	5.945410838993674	5.495210221214002	5.113630499835576	5.110596869113894	5.295281639300068	5.6540811374382525
DUSP14	10.65755299028803	10.631034360666913	11.292142983375474	11.332684960639817	11.354785262320373	10.911322712267665
EIF4E	7.408556172129497	10.219859733299312	11.114854607259042	9.052383209543068	9.878448218973118	12.781964454228117
MSTN	1e-08	1e-08	1e-08	1e-08	1e-08	0.0451916653504237
JUND	40.256562686462544	38.318027488745585	40.030889204767384	54.52501414576271	53.99247625047056	51.44682237453393
ADAM10	12.118556430062625	14.886629942531878	12.519510757581976	15.98654859563801	16.599401540067117	25.348624122109875
ZEB1	0.9325460786701633	1.0582907681113125	1.003798668655921	1.4439230096186986	1.3212757353825821	3.0174610032014177
