# Supplementary material for: Peptide-based Self-adaptive Implant Coating Sequentially Regulates Bone Regeneration to Enhance Interfacial Osseointegration
Source: Research Square preprint supplement (doi:10.21203/rs.3.rs-5132912/v1), 2024-10-01
Supplement: Supplementary file 1045 [file 8_Urea cycle and associated pathways(WP4595).heatmap-data.xls]

id	S1	S2	S3	C1	C2	C3
NOS3	0.38159880015441777	0.3134302613298843	0.2355876952524577	0.08539239732124919	0.1295182957207271	0.049416331347108
NOS2	0.0059213982579924	1e-08	0.0058938744752475	1e-08	1e-08	1e-08
GLUD1	40.9766558423349	44.20955761537604	43.79195856354085	30.0566731016322	29.573689163542085	31.34819652209449
GOT1	38.163874210584	36.85344929064389	34.96611083521063	29.20876301429696	26.358734248084758	24.38415150518452
SLC25A15	5.507727925750634	4.847520997310523	5.157740710444531	4.27620960537854	3.754319153545128	3.3074094374111973
PYCR1	60.49071553282207	56.69338543010046	57.58746139555304	43.42247012131283	45.24790434315156	40.80691358928227
MDH2	155.40025855266964	146.97371790785257	150.77099604050642	131.4988022774056	124.6689831727214	121.67716587853167
FH	24.133099828911032	27.24997037080149	26.519100549837166	21.24727514614232	21.69746746710361	23.02112748253299
GPT	0.3037239004038559	0.09227772132227899	0.0920080470520884	0.14266274828537678	0.0524564163607925	0.13509574322677048
MDH1	89.01029287381458	109.05377348676672	101.69385884404967	90.63809453310235	91.5531058042436	95.1273393242192
ASL	38.259007589580285	38.87805202574468	38.23063569162516	40.029571411755484	37.68563568169001	31.536091695443197
CPS1	2.0448088856829507	2.0041556645069227	1.9654048737953262	1.6512342450356883	1.8337599092874128	2.2482762436133132
LDHB	368.94327488409607	419.7333121103852	413.3839148111448	359.89612907509826	360.30762694747193	441.0417953822654
NAGS	0.7331179577326904	0.6390794544643883	0.6577670145211613	0.5678979357782437	0.7998297184290495	0.6338073554370379
OAT	22.94218543784737	25.534723984721175	27.988869259616802	24.50743186279368	24.65674059953373	27.00504199263468
ALDH4A1	15.897037677946502	14.141011150252027	14.352261195180079	15.634867603605272	17.1138593562252	12.117249257762927
GOT2	94.62184726429271	87.41325423612265	85.40685808984139	91.6574585437852	90.3716845493472	89.95022121376066
ASS1	38.00613337388176	35.941666261721224	36.43563466050421	39.00897789789072	40.271894702980646	34.61931118933435
SLC25A12	8.118900460562875	9.8156663066174	9.24087341055303	9.741688497164922	8.962722375619414	9.743846648056682
GLS2	1.864260801625071	1.6574834724173166	1.9812346168197692	2.107484868896856	2.0056548578033704	1.6489369213335052
SLC25A13	15.848219051147236	15.863336456495455	16.644239666510565	19.51372200772337	17.685716315470053	19.78878139771454
