# Supplementary material for: Peptide-based Self-adaptive Implant Coating Sequentially Regulates Bone Regeneration to Enhance Interfacial Osseointegration
Source: Research Square preprint supplement (doi:10.21203/rs.3.rs-5132912/v1), 2024-10-01
Supplement: Supplementary file 1049 [file 9_Imatinib and chronic myeloid leukemia(WP3640).heatmap-data.xls]

id	S1	S2	S3	C1	C2	C3
LYL1	0.99217839067107	0.755436429400195	0.7197518947159517	0.4459316261664697	0.3173063681250236	0.309671174860392
GADD45A	48.92650410677261	47.75685524555219	51.11936985045921	26.721655627804466	24.220969664753344	21.59689154728401
PIM1	9.60095601875585	8.002278657630775	8.66672820601637	4.91375324554898	4.986900343524586	4.779090291276524
GAB2	2.3494329422054046	2.4069066880977537	2.0896618790198493	1.4026255535217775	1.6529611020199737	1.2017761325650633
PDGFRB	0.07383870955057109	0.047695296239772804	0.021616328436424102	0.0127974506763272	0.0301940053250428	0.0044435145843336
SKP2	5.512617473637811	5.467648512131856	5.632214602376339	4.360696176754051	4.409369586409436	5.740452143120263
ABL1	14.584829047290464	13.396667588871475	14.208540002768602	14.268143827747075	14.020548452181021	12.070752564586792
CDKN1B	21.599794989853148	21.0777449115823	20.01880527117349	19.854235750091775	20.85549011908259	21.273056124418602
FLT1	0.0082468176202371	1e-08	1e-08	1e-08	1e-08	0.0084367832736983
ABCB1	0.0347536943022727	0.0043367014244304	0.0043240277887478	0.0127996829178545	0.0301992720257798	0.0044442896592654
SPRED2	11.104554630122372	10.782282164875117	10.695109523067766	10.843291678131429	11.44827627287764	11.675005776435833
PIM2	16.3715227540436	14.006733751439834	14.754288476925646	15.19477856682885	17.76022239201416	14.378782535576967
ABCG2	0.0134478280416394	1e-08	0.022308859876612002	0.0088049685838805	0.0222581053915709	0.018343462330143202
BCR	10.416704052490141	10.090782787609184	10.357321158092857	12.671834708557352	12.802336697083613	9.270574747911265
NOP2	25.82056105558184	26.51183994475265	24.56185699474969	30.41084698269728	31.128986236989284	26.736102937451015
MYC	24.91087149744401	26.45259962434277	24.207987759560925	30.009462100701462	29.747716894812694	28.298782530584962
FOXO3	3.4052629276318815	3.392553200671864	3.0785240520121286	3.949569756612519	3.7258285294196334	4.000583634256692
PDGFRA	1e-08	1e-08	1e-08	0.0121285211917788	1e-08	1e-08
