# Supplementary material for: Peptide-based Self-adaptive Implant Coating Sequentially Regulates Bone Regeneration to Enhance Interfacial Osseointegration
Source: Research Square preprint supplement (doi:10.21203/rs.3.rs-5132912/v1), 2024-10-01
Supplement: Supplementary file 1053 [file TFs_S-vs-C.xls]

TFs	Group	Gene_number	Genes
AF_4	ALL	1	AFF4
AF_4	DEG	0	--
AF_4	Up	0	--
AF_4	Down	0	--
AP_2	ALL	2	TFAP2A;TFAP2C
AP_2	DEG	0	--
AP_2	Up	0	--
AP_2	Down	0	--
ARID	ALL	5	KDM5A;ARID3A;KDM5B;KDM5C;ARID1B
ARID	DEG	0	--
ARID	Up	0	--
ARID	Down	0	--
Androgen_rcpt	ALL	1	AR
Androgen_rcpt	DEG	0	--
Androgen_rcpt	Up	0	--
Androgen_rcpt	Down	0	--
CBF	ALL	1	CBFB
CBF	DEG	0	--
CBF	Up	0	--
CBF	Down	0	--
CG_1	ALL	1	CAMTA2
CG_1	DEG	0	--
CG_1	Up	0	--
CG_1	Down	0	--
COE	ALL	2	EBF1;EBF3
COE	DEG	0	--
COE	Up	0	--
COE	Down	0	--
COUP_TF	ALL	2	NR2F1;NR2F2
COUP_TF	DEG	0	--
COUP_TF	Up	0	--
COUP_TF	Down	0	--
CP2	ALL	4	GRHL1;GRHL3;GRHL2;UBP1
CP2	DEG	0	--
CP2	Up	0	--
CP2	Down	0	--
CUT	ALL	2	ONECUT1;CUX1
CUT	DEG	0	--
CUT	Up	0	--
CUT	Down	0	--
Cnucl_rcpt	ALL	1	PPARG
Cnucl_rcpt	DEG	0	--
Cnucl_rcpt	Up	0	--
Cnucl_rcpt	Down	0	--
DM	ALL	1	DMRT1
DM	DEG	0	--
DM	Up	0	--
DM	Down	0	--
E2F	ALL	8	E2F1;E2F3;E2F8;E2F2;E2F4;E2F6;E2F7;TFDP1
E2F	DEG	0	--
E2F	Up	0	--
E2F	Down	0	--
ETS	ALL	22	EHF;ELF2;ELF5;ELK3;ERF;ETV1;ETV7;FLI1;GABPA;ELF1;ELF3;ELK1;ELK4;ERG;ETS1;ETS2;ETV4;ETV5;SPDEF;SPI1;SPIB;ETV6
ETS	DEG	0	--
ETS	Up	0	--
ETS	Down	0	--
Ecdysone_rcpt	ALL	2	NR1H3;NR1H2
Ecdysone_rcpt	DEG	0	--
Ecdysone_rcpt	Up	0	--
Ecdysone_rcpt	Down	0	--
Fork_head	ALL	12	FOXA2;FOXD2;FOXG1;FOXH1;FOXK1;FOXM1;FOXO3;FOXO4;FOXP1;FOXP2;FOXR2;FOXO1
Fork_head	DEG	0	--
Fork_head	Up	0	--
Fork_head	Down	0	--
GCR	ALL	1	NR3C1
GCR	DEG	0	--
GCR	Up	0	--
GCR	Down	0	--
HMG	ALL	12	HBP1;LEF1;SOX10;SOX2;SOX4;SOX17;SOX3;SOX9;TCF7L2;UBTF;HMG20A;WDHD1
HMG	DEG	0	--
HMG	Up	0	--
HMG	Down	0	--
HSF	ALL	2	HSF1;HSF2
HSF	DEG	0	--
HSF	Up	0	--
HSF	Down	0	--
Homeobox	ALL	42	BARHL1;BARX2;CDX2;DLX2;HNF1B;HOXA1;HOXA13;HOXA4;HOXA5;HOXA6;HOXA7;HOXA9;HOXB13;HOXB4;HOXC6;HOXC8;ISL1;LHX2;MEIS2;MSX1;NANOG;NKX2-1;NKX2-5;NKX3-1;PBX1;PDX1;PITX1;ZEB1;ZFHX3;DLX4;DUX4;EMX1;MEIS1;PBX2;PBX3;SIX5;HOXB7;SIX2;TLX1;HOXC11;SIX1;MIXL1
Homeobox	DEG	1	HNF1B
Homeobox	Up	0	--
Homeobox	Down	1	HNF1B
IRF	ALL	5	IRF1;IRF2;IRF4;IRF5;IRF3
IRF	DEG	0	--
IRF	Up	0	--
IRF	Down	0	--
MBD	ALL	3	MBD3;MBD4;MECP2
MBD	DEG	0	--
MBD	Up	0	--
MBD	Down	0	--
MH1	ALL	4	SMAD1;SMAD2;SMAD3;SMAD4
MH1	DEG	0	--
MH1	Up	0	--
MH1	Down	0	--
MYB	ALL	9	MYB;MYBL2;NCOR1;NCOR2;ZZZ3;MYBL1;RCOR1;SNAPC4;TERF1
MYB	DEG	0	--
MYB	Up	0	--
MYB	Down	0	--
NF-YA	ALL	1	NFYA
NF-YA	DEG	0	--
NF-YA	Up	0	--
NF-YA	Down	0	--
NF-YB/C	ALL	3	NFYB;NFYC;DRAP1
NF-YB/C	DEG	0	--
NF-YB/C	Up	0	--
NF-YB/C	Down	0	--
NFI	ALL	2	NFIC;NFIA
NFI	DEG	0	--
NFI	Up	0	--
NFI	Down	0	--
NGFIB-like	ALL	1	NR4A1
NGFIB-like	DEG	0	--
NGFIB-like	Up	0	--
NGFIB-like	Down	0	--
Nrf1	ALL	1	NRF1
Nrf1	DEG	0	--
Nrf1	Up	0	--
Nrf1	Down	0	--
Oestrogen_rcpt	ALL	1	ESR1
Oestrogen_rcpt	DEG	0	--
Oestrogen_rcpt	Up	0	--
Oestrogen_rcpt	Down	0	--
P53	ALL	3	TP53;TP63;TP73
P53	DEG	0	--
P53	Up	0	--
P53	Down	0	--
PAX	ALL	3	PAX5;PAX3;PAX6
PAX	DEG	0	--
PAX	Up	0	--
PAX	Down	0	--
POU	ALL	4	POU2F1;POU2F2;POU5F1;POU3F2
POU	DEG	0	--
POU	Up	0	--
POU	Down	0	--
Progesterone_rcpt	ALL	1	PGR
Progesterone_rcpt	DEG	0	--
Progesterone_rcpt	Up	0	--
Progesterone_rcpt	Down	0	--
RFX	ALL	4	RFX2;RFX5;RFX3;ARID2
RFX	DEG	0	--
RFX	Up	0	--
RFX	Down	0	--
RHD	ALL	8	NFAT5;NFATC1;NFKB2;RELA;NFATC3;REL;NFKB1;RELB
RHD	DEG	2	NFAT5;REL
RHD	Up	0	--
RHD	Down	2	NFAT5;REL
ROR_rcpt	ALL	1	RORA
ROR_rcpt	DEG	0	--
ROR_rcpt	Up	0	--
ROR_rcpt	Down	0	--
Retinoic_acid_rcpt	ALL	3	ESRRA;NR2C2;NR5A2
Retinoic_acid_rcpt	DEG	0	--
Retinoic_acid_rcpt	Up	0	--
Retinoic_acid_rcpt	Down	0	--
Runt	ALL	3	RUNX1;RUNX3;RUNX2
Runt	DEG	0	--
Runt	Up	0	--
Runt	Down	0	--
SAND	ALL	2	GMEB1;GMEB2
SAND	DEG	0	--
SAND	Up	0	--
SAND	Down	0	--
SRF	ALL	4	MEF2C;SRF;MEF2A;MEF2B
SRF	DEG	1	MEF2C
SRF	Up	1	MEF2C
SRF	Down	0	--
STAT	ALL	7	STAT2;STAT4;STAT5B;STAT1;STAT3;STAT5A;STAT6
STAT	DEG	0	--
STAT	Up	0	--
STAT	Down	0	--
T-box	ALL	4	EOMES;TBX3;TBX21;TBX5
T-box	DEG	1	EOMES
T-box	Up	1	EOMES
T-box	Down	0	--
TEA	ALL	2	TEAD4;TEAD1
TEA	DEG	0	--
TEA	Up	0	--
TEA	Down	0	--
TF family	ALL	1	TF
TF family	DEG	0	--
TF family	Up	0	--
TF family	Down	0	--
TF_Otx	ALL	1	OTX2
TF_Otx	DEG	0	--
TF_Otx	Up	0	--
TF_Otx	Down	0	--
TF_bZIP	ALL	30	ATF2;BACH1;CEBPA;CEBPB;CEBPD;CREB1;CREM;DBP;FOS;FOSL1;FOSL2;MAF;MAFB;MAFF;MAFG;MAFK;NFE2;NFE2L2;XBP1;ATF1;ATF3;ATF5;BACH2;BATF;CREB3;JUN;JUNB;JUND;BATF3;NFIL3
TF_bZIP	DEG	3	ATF3;FOSL1;MAF
TF_bZIP	Up	2	ATF3;FOSL1
TF_bZIP	Down	1	MAF
THAP	ALL	2	THAP1;THAP11
THAP	DEG	0	--
THAP	Up	0	--
THAP	Down	0	--
TIG	ALL	1	RBPJ
TIG	DEG	0	--
TIG	Up	0	--
TIG	Down	0	--
TSC22	ALL	1	TSC22D4
TSC22	DEG	0	--
TSC22	Up	0	--
TSC22	Down	0	--
ThyrH_rcpt	ALL	9	HNF4A;HNF4G;RARA;RARG;RXRG;ESR2;RXRA;VDR;NR3C2
ThyrH_rcpt	DEG	1	NR3C2
ThyrH_rcpt	Up	1	NR3C2
ThyrH_rcpt	Down	0	--
ZBTB	ALL	14	ZBTB10;ZBTB17;ZBTB2;ZBTB7A;ZBTB7B;BCL6;MYNN;ZBTB26;PATZ1;ZBTB16;ZBTB6;ZBTB42;ZBTB12;ZBTB48
ZBTB	DEG	0	--
ZBTB	Up	0	--
ZBTB	Down	0	--
bHLH	ALL	39	ASCL1;ASCL2;CLOCK;ID3;LYL1;MAX;MNT;MYOD1;TAL1;TCF21;TCF3;AHR;ARNT;ARNTL;ATOH1;BHLHE40;HAND1;HAND2;HES1;HES4;HEY1;MITF;MXI1;MYC;SREBF1;SREBF2;TCF12;TCF4;TFAP4;TFE3;USF1;USF2;TWIST1;AHRR;MYF5;MYOG;NEUROG2;MYCN;NEUROD1
bHLH	DEG	3	CLOCK;HEY1;LYL1
bHLH	Up	2	HEY1;LYL1
bHLH	Down	1	CLOCK
chromosome_remodelling_factor	ALL	38	BRD3;BRD7;CBX3;CBX4;CBX8;CENPA;CHD1;CHD3;CHD4;EZH1;FOXA1;FOXP3;KAT2B;KDM4A;MBD2;RB1;SETDB1;SMARCC2;YY1;BMI1;BRD4;EED;HDAC1;HDAC2;HDAC8;KAT2A;KLF1;PCGF2;SMARCA4;SMARCB1;SMARCC1;EZH2;INO80;SMARCE1;SUPT5H;ARID1A;JMJD1C;BPTF
chromosome_remodelling_factor	DEG	1	JMJD1C
chromosome_remodelling_factor	Up	0	--
chromosome_remodelling_factor	Down	1	JMJD1C
other	ALL	159	ASXL1;RING1;CBFA2T3;PCGF1;SKI;DPF1;ZNF322;YAP1;POU2AF1;LARP7;ZSCAN31;ZNF350;GTF3C5;ZBTB14;TAZ;KDM2B;ZNF595;CBX2;ZMYM3;ERCC8;ZNF280A;HEXIM1;KMT2D;CRY1;MAML3;APC;CDK12;ZBTB18;ILF3;BCL3;BCOR;BDP1;BRCA1;BRD2;BRF1;CARM1;CASZ1;CDK2;CDK8;CDK9;CEBPZ;CHD7;CIITA;CTNNB1;EGLN2;ELL2;EP300;EPAS1;ERMAP;EWSR1;FANCD2;GTF2I;GTF3C1;GTF3C2;HCFC1;HIRA;HMGN1;HMGN3;HNRNPL;ICE1;ICE2;JAZF1;JMJD6;KAT5;KMT2A;KMT2B;L3MBTL2;…
other	DEG	6	APC;ATRX;HIF1A;NIPBL;NPAT;TET2
other	Up	0	--
other	Down	6	APC;ATRX;HIF1A;NIPBL;NPAT;TET2
zf-BED	ALL	1	ZBED4
zf-BED	DEG	0	--
zf-BED	Up	0	--
zf-BED	Down	0	--
zf-C2H2	ALL	141	CTCF;GFI1B;GLI1;GLIS1;GLIS3;HIVEP1;IKZF1;KLF10;KLF3;KLF5;MAZ;MZF1;PRDM1;PRDM14;SNAI2;ZFAT;ZFP42;ZFX;ZKSCAN1;ZNF12;ZNF143;ZNF217;ZNF236;ZNF250;ZNF263;ZNF266;ZNF280D;ZNF384;ZNF76;ZNF84;BCL11A;CTCFL;EGR1;EGR2;GLI2;GLIS2;HINFP;KLF4;KLF9;MECOM;REPIN1;REST;SALL4;SP1;SP2;SP3;SP4;VEZF1;ZNF281;ZNF711;ZNF83;ZNF92;ZNF22;ZNF354A;OVOL2;ZNF134;ZNF419;ZNF184;ZNF257;ZNF502;PRDM6;ZNF778;KLF15;ZNF436;PLAG1;ZNF335;…
zf-C2H2	DEG	2	PRDM1;ZNF708
zf-C2H2	Up	0	--
zf-C2H2	Down	2	PRDM1;ZNF708
zf-GATA	ALL	7	GATA1;GATA2;GATA3;GATA4;GATA6;GATAD1;MTA3
zf-GATA	DEG	0	--
zf-GATA	Up	0	--
zf-GATA	Down	0	--
zf-MIZ	ALL	3	PIAS1;PIAS4;ZMIZ1
zf-MIZ	DEG	0	--
zf-MIZ	Up	0	--
zf-MIZ	Down	0	--
