# Supplementary material for: Peptide-based Self-adaptive Implant Coating Sequentially Regulates Bone Regeneration to Enhance Interfacial Osseointegration
Source: Research Square preprint supplement (doi:10.21203/rs.3.rs-5132912/v1), 2024-10-01
Supplement: Supplementary file 1057 [file Target_Statistics_diff-S-vs-C_TF_regulation.xls]

Family	TF	targets_up_down	targets_num
RHD	REL|Down;NFAT5|Down	Down	153
RHD	REL|Down;NFAT5|Down	Up	123
TF_bZIP	ATF3|Up;FOSL1|Up;MAF|Down	Down	207
TF_bZIP	MAF|Down;ATF3|Up;FOSL1|Up	Up	183
ThyrH_rcpt	NR3C2|Up	Down	16
ThyrH_rcpt	NR3C2|Up	Up	7
bHLH	HEY1|Up;LYL1|Up	Down	51
bHLH	HEY1|Up;LYL1|Up	Up	49
chromosome_remodelling_factor	JMJD1C|Down	Down	173
chromosome_remodelling_factor	JMJD1C|Down	Up	155
other	NIPBL|Down;ATRX|Down;NPAT|Down;TET2|Down	Up	124
other	NPAT|Down;NIPBL|Down;TET2|Down	Down	119
zf-C2H2	ZNF708|Down	Up	1
