# Supplementary material for: Peptide-based Self-adaptive Implant Coating Sequentially Regulates Bone Regeneration to Enhance Interfacial Osseointegration
Source: Research Square preprint supplement (doi:10.21203/rs.3.rs-5132912/v1), 2024-10-01
Supplement: Supplementary file 1061 [file diff-S-vs-C_TF_regulation.xls]

TF_id	TF_up_down	Target	Target_up_down	Function
ATF3	Up	ACBD7	Up	Regulates
ATF3	Up	ACHE	Up	Regulates
ATF3	Up	ADAM8	Up	Regulates
ATF3	Up	ADAMTS5	Down	Regulates
ATF3	Up	ADAMTS7	Down	Regulates
ATF3	Up	ADAMTSL4	Up	Regulates
ATF3	Up	ADAT3	Down	Regulates
ATF3	Up	ADM2	Up	Regulates
ATF3	Up	AGL	Down	Regulates
ATF3	Up	AHI1	Down	Regulates
ATF3	Up	AKR1B1	Down	Regulates
ATF3	Up	ALDH1L2	Up	Regulates
ATF3	Up	ALDH3B1	Up	Regulates
ATF3	Up	ALOX5AP	Up	Regulates
ATF3	Up	ALOXE3	Up	Regulates
ATF3	Up	ALPK3	Down	Regulates
ATF3	Up	ANK1	Down	Regulates
ATF3	Up	ANKRD2	Down	Regulates
ATF3	Up	ANKRD24	Up	Regulates
ATF3	Up	APLN	Up	Regulates
ATF3	Up	ARHGAP29	Down	Regulates
ATF3	Up	ARHGAP42	Down	Regulates
ATF3	Up	ARID4B	Down	Regulates
ATF3	Up	ARL4C	Down	Regulates
ATF3	Up	ARRDC4	Up	Regulates
ATF3	Up	ARSG	Up	Regulates
ATF3	Up	ASH1L	Down	Regulates
ATF3	Up	ASNS	Up	Regulates
ATF3	Up	ATF3	Up	Regulates
ATF3	Up	ATF4	Up	Regulates
ATF3	Up	ATRX	Down	Regulates
ATF3	Up	AVPR2	Up	Regulates
ATF3	Up	B3GNT3	Up	Regulates
ATF3	Up	BAZ1A	Down	Regulates
ATF3	Up	BAZ2B	Down	Regulates
ATF3	Up	BEGAIN	Up	Regulates
ATF3	Up	BMPR1B	Down	Regulates
ATF3	Up	BMPR2	Down	Regulates
ATF3	Up	BTBD19	Down	Regulates
ATF3	Up	BTC	Down	Regulates
ATF3	Up	C15orf62	Down	Regulates
ATF3	Up	C16orf74	Up	Regulates
ATF3	Up	C1orf21	Up	Regulates
ATF3	Up	C6orf132	Up	Regulates
ATF3	Up	C6orf141	Up	Regulates
ATF3	Up	CACNB4	Down	Regulates
ATF3	Up	CARS1	Up	Regulates
ATF3	Up	CCDC92	Down	Regulates
ATF3	Up	CCL20	Up	Regulates
ATF3	Up	CD22	Up	Regulates
ATF3	Up	CD274	Up	Regulates
ATF3	Up	CD2AP	Down	Regulates
ATF3	Up	CD68	Up	Regulates
ATF3	Up	CDC42BPA	Down	Regulates
ATF3	Up	CDC42EP5	Up	Regulates
ATF3	Up	CDH16	Down	Regulates
ATF3	Up	CDH5	Down	Regulates
ATF3	Up	CDK18	Up	Regulates
ATF3	Up	CDKN1C	Up	Regulates
ATF3	Up	CEP162	Down	Regulates
ATF3	Up	CEP350	Down	Regulates
ATF3	Up	CHAC1	Up	Regulates
ATF3	Up	CHD5	Up	Regulates
ATF3	Up	CHRNA3	Up	Regulates
ATF3	Up	CITED4	Down	Regulates
ATF3	Up	CKLF	Down	Regulates
ATF3	Up	CLDN1	Down	Regulates
ATF3	Up	CLDN2	Down	Regulates
ATF3	Up	CLDN4	Down	Regulates
ATF3	Up	CMTM1	Down	Regulates
ATF3	Up	COBLL1	Down	Regulates
ATF3	Up	COL13A1	Up	Regulates
ATF3	Up	COL7A1	Down	Regulates
ATF3	Up	CORO1A	Up	Regulates
ATF3	Up	CORO2B	Up	Regulates
ATF3	Up	CPA4	Up	Regulates
ATF3	Up	CPED1	Up	Regulates
ATF3	Up	CREBRF	Down	Regulates
ATF3	Up	CYB5R2	Up	Regulates
ATF3	Up	CYP27C1	Down	Regulates
ATF3	Up	CYP3A5	Down	Regulates
ATF3	Up	DACT3	Up	Regulates
ATF3	Up	DDIT3	Up	Regulates
ATF3	Up	DDN	Up	Regulates
ATF3	Up	DGKH	Down	Regulates
ATF3	Up	DKKL1	Up	Regulates
ATF3	Up	DMC1	Up	Regulates
ATF3	Up	DNAH17	Down	Regulates
ATF3	Up	DNAJB14	Down	Regulates
ATF3	Up	DNAJC13	Down	Regulates
ATF3	Up	DNHD1	Down	Regulates
ATF3	Up	DOCK2	Down	Regulates
ATF3	Up	DOK3	Down	Regulates
ATF3	Up	DST	Down	Regulates
ATF3	Up	DUSP15	Up	Regulates
ATF3	Up	ECM1	Up	Regulates
ATF3	Up	EFCAB2	Down	Regulates
ATF3	Up	EFNA1	Down	Regulates
ATF3	Up	EIF4EBP1	Up	Regulates
ATF3	Up	ENDOD1	Up	Regulates
ATF3	Up	EOMES	Up	Regulates
ATF3	Up	ERCC6L2	Down	Regulates
ATF3	Up	ESCO1	Down	Regulates
ATF3	Up	ETNK1	Down	Regulates
ATF3	Up	EXPH5	Down	Regulates
ATF3	Up	EYS	Down	Regulates
ATF3	Up	F3	Up	Regulates
ATF3	Up	FA2H	Up	Regulates
ATF3	Up	FAM107B	Up	Regulates
ATF3	Up	FAM135A	Down	Regulates
ATF3	Up	FAM167A	Up	Regulates
ATF3	Up	FAM214A	Down	Regulates
ATF3	Up	FAR2	Down	Regulates
ATF3	Up	FAXDC2	Down	Regulates
ATF3	Up	FER	Down	Regulates
ATF3	Up	FIGN	Down	Regulates
ATF3	Up	FMNL1	Up	Regulates
ATF3	Up	FNDC5	Up	Regulates
ATF3	Up	FOSL1	Up	Regulates
ATF3	Up	FOXF2	Up	Regulates
ATF3	Up	FRMD4A	Down	Regulates
ATF3	Up	FUT1	Up	Regulates
ATF3	Up	FXYD2	Down	Regulates
ATF3	Up	GAB1	Down	Regulates
ATF3	Up	GJB7	Down	Regulates
ATF3	Up	GPCPD1	Up	Regulates
ATF3	Up	GPR137C	Down	Regulates
ATF3	Up	GPSM3	Up	Regulates
ATF3	Up	GREB1	Up	Regulates
ATF3	Up	GSDMA	Up	Regulates
ATF3	Up	MACROH2A2	Up	Regulates
ATF3	Up	HAVCR1	Down	Regulates
ATF3	Up	HBEGF	Up	Regulates
ATF3	Up	HES2	Up	Regulates
ATF3	Up	HEY1	Up	Regulates
ATF3	Up	H1-2	Down	Regulates
ATF3	Up	H2AC6	Down	Regulates
ATF3	Up	H2AC8	Down	Regulates
ATF3	Up	H2AC11	Down	Regulates
ATF3	Up	H2AC13	Down	Regulates
ATF3	Up	H2BC4	Down	Regulates
ATF3	Up	H2BC5	Down	Regulates
ATF3	Up	H2BC8	Down	Regulates
ATF3	Up	H2BC9	Up	Regulates
ATF3	Up	H2BC11	Down	Regulates
ATF3	Up	H2BC12	Down	Regulates
ATF3	Up	H2BC15	Down	Regulates
ATF3	Up	H3C6	Down	Regulates
ATF3	Up	H3C8	Down	Regulates
ATF3	Up	H3C10	Down	Regulates
ATF3	Up	H4C8	Down	Regulates
ATF3	Up	H2BC21	Down	Regulates
ATF3	Up	HSD17B6	Up	Regulates
ATF3	Up	HSH2D	Up	Regulates
ATF3	Up	HTR1D	Up	Regulates
ATF3	Up	ICAM4	Down	Regulates
ATF3	Up	ID2	Up	Regulates
ATF3	Up	IGIP	Down	Regulates
ATF3	Up	IGSF10	Down	Regulates
ATF3	Up	IL11	Up	Regulates
ATF3	Up	IL22RA1	Up	Regulates
ATF3	Up	IL6ST	Down	Regulates
ATF3	Up	INHBE	Up	Regulates
ATF3	Up	INO80D	Down	Regulates
ATF3	Up	IQCD	Down	Regulates
ATF3	Up	IRAK3	Down	Regulates
ATF3	Up	JAK3	Up	Regulates
ATF3	Up	JAM2	Down	Regulates
ATF3	Up	JDP2	Up	Regulates
ATF3	Up	JMJD1C	Down	Regulates
ATF3	Up	KANK3	Up	Regulates
ATF3	Up	KAT6B	Down	Regulates
ATF3	Up	KBTBD11	Up	Regulates
ATF3	Up	KCNMA1	Down	Regulates
ATF3	Up	KIAA1109	Down	Regulates
ATF3	Up	ELAPOR1	Down	Regulates
ATF3	Up	RESF1	Down	Regulates
ATF3	Up	KIAA2026	Down	Regulates
ATF3	Up	KIF21A	Down	Regulates
ATF3	Up	KIF21B	Up	Regulates
ATF3	Up	KLF2	Up	Regulates
ATF3	Up	KLRC4	Down	Regulates
ATF3	Up	KRT15	Up	Regulates
ATF3	Up	LCP1	Up	Regulates
ATF3	Up	LGALS4	Up	Regulates
ATF3	Up	LHX6	Up	Regulates
ATF3	Up	LIPC	Down	Regulates
ATF3	Up	LIPH	Down	Regulates
ATF3	Up	LMO4	Up	Regulates
ATF3	Up	LONRF2	Down	Regulates
ATF3	Up	LRG1	Up	Regulates
ATF3	Up	LRP3	Up	Regulates
ATF3	Up	LRRN4	Down	Regulates
ATF3	Up	LTB	Down	Regulates
ATF3	Up	LYL1	Up	Regulates
ATF3	Up	LYNX1	Down	Regulates
ATF3	Up	LYPD3	Up	Regulates
ATF3	Up	LYPD6	Up	Regulates
ATF3	Up	MAF	Down	Regulates
ATF3	Up	MAP1A	Up	Regulates
ATF3	Up	MAP3K1	Down	Regulates
ATF3	Up	MAP3K7CL	Up	Regulates
ATF3	Up	MARS1	Up	Regulates
ATF3	Up	MATK	Up	Regulates
ATF3	Up	MATN4	Up	Regulates
ATF3	Up	MBNL2	Down	Regulates
ATF3	Up	MDFI	Up	Regulates
ATF3	Up	MDGA1	Down	Regulates
ATF3	Up	MDK	Up	Regulates
ATF3	Up	MGARP	Down	Regulates
ATF3	Up	MKLN1	Down	Regulates
ATF3	Up	MMP9	Up	Regulates
ATF3	Up	MPZL3	Up	Regulates
ATF3	Up	MTHFD2	Up	Regulates
ATF3	Up	MUC1	Down	Regulates
ATF3	Up	MXD1	Down	Regulates
ATF3	Up	MYCL	Up	Regulates
ATF3	Up	MYO7A	Down	Regulates
ATF3	Up	N4BP2	Down	Regulates
ATF3	Up	NAT16	Up	Regulates
ATF3	Up	NDUFA4L2	Up	Regulates
ATF3	Up	NEGR1	Down	Regulates
ATF3	Up	NEK11	Down	Regulates
ATF3	Up	NEURL3	Down	Regulates
ATF3	Up	NFAT5	Down	Regulates
ATF3	Up	NGFR	Up	Regulates
ATF3	Up	NIPBL	Down	Regulates
ATF3	Up	NKD1	Up	Regulates
ATF3	Up	NLRP1	Up	Regulates
ATF3	Up	NOS3	Up	Regulates
ATF3	Up	NPAT	Down	Regulates
ATF3	Up	NPHS1	Down	Regulates
ATF3	Up	NPTXR	Down	Regulates
ATF3	Up	NR3C2	Up	Regulates
ATF3	Up	NREP	Down	Regulates
ATF3	Up	NT5M	Up	Regulates
ATF3	Up	NTM	Up	Regulates
ATF3	Up	NTNG2	Up	Regulates
ATF3	Up	NTSR1	Up	Regulates
ATF3	Up	OGDHL	Up	Regulates
ATF3	Up	OSGIN1	Up	Regulates
ATF3	Up	PBLD	Down	Regulates
ATF3	Up	PCK2	Up	Regulates
ATF3	Up	PDCD1LG2	Up	Regulates
ATF3	Up	PDE2A	Up	Regulates
ATF3	Up	PDE6B	Down	Regulates
ATF3	Up	PDZD4	Up	Regulates
ATF3	Up	PGAP1	Down	Regulates
ATF3	Up	PGF	Up	Regulates
ATF3	Up	PGM2L1	Down	Regulates
ATF3	Up	PHGDH	Up	Regulates
ATF3	Up	PIBF1	Down	Regulates
ATF3	Up	PIK3IP1	Down	Regulates
ATF3	Up	PLA2G4B	Down	Regulates
ATF3	Up	PLAUR	Up	Regulates
ATF3	Up	PLCB4	Down	Regulates
ATF3	Up	PLXNB3	Up	Regulates
ATF3	Up	PMEPA1	Down	Regulates
ATF3	Up	PPP1R3F	Down	Regulates
ATF3	Up	PRODH	Up	Regulates
ATF3	Up	PRR19	Down	Regulates
ATF3	Up	PSAT1	Up	Regulates
ATF3	Up	PSD3	Down	Regulates
ATF3	Up	PSD4	Down	Regulates
ATF3	Up	PSTPIP2	Up	Regulates
ATF3	Up	PTAFR	Up	Regulates
ATF3	Up	PTH1R	Up	Regulates
ATF3	Up	PTPN13	Down	Regulates
ATF3	Up	PTPRG	Down	Regulates
ATF3	Up	QPRT	Down	Regulates
ATF3	Up	RAB11FIP4	Up	Regulates
ATF3	Up	RAB17	Down	Regulates
ATF3	Up	RAB3IL1	Up	Regulates
ATF3	Up	RASGRF1	Up	Regulates
ATF3	Up	RASGRP1	Down	Regulates
ATF3	Up	RASGRP2	Up	Regulates
ATF3	Up	RBM25	Down	Regulates
ATF3	Up	RC3H1	Down	Regulates
ATF3	Up	REL	Down	Regulates
ATF3	Up	REV3L	Down	Regulates
ATF3	Up	RGS2	Up	Regulates
ATF3	Up	RHOB	Down	Regulates
ATF3	Up	ROBO4	Up	Regulates
ATF3	Up	RSF1	Down	Regulates
ATF3	Up	S100A3	Down	Regulates
ATF3	Up	S100A4	Down	Regulates
ATF3	Up	SAT1	Down	Regulates
ATF3	Up	SCAF11	Down	Regulates
ATF3	Up	SCARA5	Down	Regulates
ATF3	Up	SCN1B	Up	Regulates
ATF3	Up	SCN4B	Up	Regulates
ATF3	Up	SDSL	Up	Regulates
ATF3	Up	SEMA3C	Down	Regulates
ATF3	Up	SEMA7A	Up	Regulates
ATF3	Up	SERPINE1	Up	Regulates
ATF3	Up	SERPINE2	Up	Regulates
ATF3	Up	SETX	Down	Regulates
ATF3	Up	SGK2	Down	Regulates
ATF3	Up	SH2D2A	Up	Regulates
ATF3	Up	SIRPB2	Up	Regulates
ATF3	Up	SKIL	Down	Regulates
ATF3	Up	SLC16A14	Up	Regulates
ATF3	Up	SLC16A6	Up	Regulates
ATF3	Up	SLC1A4	Up	Regulates
ATF3	Up	SLC1A5	Up	Regulates
ATF3	Up	SLC2A12	Down	Regulates
ATF3	Up	SLC37A1	Up	Regulates
ATF3	Up	SLC37A2	Up	Regulates
ATF3	Up	SLC3A2	Up	Regulates
ATF3	Up	SLC44A2	Up	Regulates
ATF3	Up	SLC5A3	Down	Regulates
ATF3	Up	SLC6A16	Down	Regulates
ATF3	Up	SLC7A11	Up	Regulates
ATF3	Up	SLC7A5	Up	Regulates
ATF3	Up	SLC7A6	Down	Regulates
ATF3	Up	SMAD6	Down	Regulates
ATF3	Up	SNCG	Up	Regulates
ATF3	Up	SNX29	Down	Regulates
ATF3	Up	SP6	Up	Regulates
ATF3	Up	SPOCD1	Up	Regulates
ATF3	Up	SPTBN4	Up	Regulates
ATF3	Up	SREK1	Down	Regulates
ATF3	Up	SSPN	Down	Regulates
ATF3	Up	STARD4	Down	Regulates
ATF3	Up	STARD6	Up	Regulates
ATF3	Up	STEAP1	Up	Regulates
ATF3	Up	SYDE2	Down	Regulates
ATF3	Up	SYNE2	Down	Regulates
ATF3	Up	SYNE3	Up	Regulates
ATF3	Up	SYNGR4	Up	Regulates
ATF3	Up	SYT12	Down	Regulates
ATF3	Up	SYT8	Down	Regulates
ATF3	Up	TAOK1	Down	Regulates
ATF3	Up	TET2	Down	Regulates
ATF3	Up	TGM4	Down	Regulates
ATF3	Up	THBD	Up	Regulates
ATF3	Up	TMEM80	Down	Regulates
ATF3	Up	TMEM92	Up	Regulates
ATF3	Up	TMIE	Up	Regulates
ATF3	Up	TMTC3	Down	Regulates
ATF3	Up	TNFRSF17	Down	Regulates
ATF3	Up	TNFSF14	Down	Regulates
ATF3	Up	TNS4	Up	Regulates
ATF3	Up	TP53I11	Up	Regulates
ATF3	Up	TRIB2	Down	Regulates
ATF3	Up	TRIM2	Down	Regulates
ATF3	Up	TRPM8	Down	Regulates
ATF3	Up	TTC3	Down	Regulates
ATF3	Up	TTYH2	Up	Regulates
ATF3	Up	TUBE1	Up	Regulates
ATF3	Up	UCN2	Down	Regulates
ATF3	Up	UHRF1BP1L	Down	Regulates
ATF3	Up	UPP1	Up	Regulates
ATF3	Up	USP34	Down	Regulates
ATF3	Up	UTRN	Down	Regulates
ATF3	Up	VPS13A	Down	Regulates
ATF3	Up	VPS13B	Down	Regulates
ATF3	Up	VPS13C	Down	Regulates
ATF3	Up	VSIG1	Down	Regulates
ATF3	Up	VWA5A	Up	Regulates
ATF3	Up	WNT11	Up	Regulates
ATF3	Up	YARS1	Up	Regulates
ATF3	Up	ZBED6	Down	Regulates
ATF3	Up	ZBTB20	Down	Regulates
ATF3	Up	ZHX1-C8orf76	Down	Regulates
ATF3	Up	ZNF185	Up	Regulates
ATF3	Up	ZNF385C	Up	Regulates
ATF3	Up	ZNF407	Down	Regulates
ATF3	Up	ZNF433	Up	Regulates
ATF3	Up	ZNF652	Down	Regulates
ATF3	Up	ZNF69	Down	Regulates
ATF3	Up	ZNF708	Down	Regulates
ATF3	Up	ZNF713	Down	Regulates
ATRX	Down	SLC7A5	Up	Regulates
FOSL1	Up	ADAM8	Up	Regulates
FOSL1	Up	ADAMTS7	Down	Regulates
FOSL1	Up	ADAMTSL4	Up	Regulates
FOSL1	Up	ADAT3	Down	Regulates
FOSL1	Up	AHI1	Down	Regulates
FOSL1	Up	AKR1B1	Down	Regulates
FOSL1	Up	ALDH3B1	Up	Regulates
FOSL1	Up	ALOX5AP	Up	Regulates
FOSL1	Up	ALOXE3	Up	Regulates
FOSL1	Up	ANK1	Down	Regulates
FOSL1	Up	ANKRD2	Down	Regulates
FOSL1	Up	ARHGAP29	Down	Regulates
FOSL1	Up	ARHGAP42	Down	Regulates
FOSL1	Up	ARSG	Up	Regulates
FOSL1	Up	ATF3	Up	Regulates
FOSL1	Up	BAZ1A	Down	Regulates
FOSL1	Up	BEGAIN	Up	Regulates
FOSL1	Up	BMPR1B	Down	Regulates
FOSL1	Up	BTBD19	Down	Regulates
FOSL1	Up	C16orf74	Up	Regulates
FOSL1	Up	C1orf21	Up	Regulates
FOSL1	Up	C6orf132	Up	Regulates
FOSL1	Up	CARS1	Up	Regulates
FOSL1	Up	CCL20	Up	Regulates
FOSL1	Up	CD22	Up	Regulates
FOSL1	Up	CD274	Up	Regulates
FOSL1	Up	CD68	Up	Regulates
FOSL1	Up	CDC42BPA	Down	Regulates
FOSL1	Up	CDH5	Down	Regulates
FOSL1	Up	CDKN1C	Up	Regulates
FOSL1	Up	CEP162	Down	Regulates
FOSL1	Up	CHD5	Up	Regulates
FOSL1	Up	CLDN2	Down	Regulates
FOSL1	Up	CLDN4	Down	Regulates
FOSL1	Up	COL13A1	Up	Regulates
FOSL1	Up	COL7A1	Down	Regulates
FOSL1	Up	CORO2B	Up	Regulates
FOSL1	Up	CPA4	Up	Regulates
FOSL1	Up	CYP27C1	Down	Regulates
FOSL1	Up	DDIT3	Up	Regulates
FOSL1	Up	DOCK2	Down	Regulates
FOSL1	Up	DOK3	Down	Regulates
FOSL1	Up	DST	Down	Regulates
FOSL1	Up	ECM1	Up	Regulates
FOSL1	Up	EIF4E3	Up	Regulates
FOSL1	Up	EIF4EBP1	Up	Regulates
FOSL1	Up	ENDOD1	Up	Regulates
FOSL1	Up	ESCO1	Down	Regulates
FOSL1	Up	EYS	Down	Regulates
FOSL1	Up	F3	Up	Regulates
FOSL1	Up	FA2H	Up	Regulates
FOSL1	Up	FAM107B	Up	Regulates
FOSL1	Up	FAM167A	Up	Regulates
FOSL1	Up	FER	Down	Regulates
FOSL1	Up	FMNL1	Up	Regulates
FOSL1	Up	FOSL1	Up	Regulates
FOSL1	Up	FRMD4A	Down	Regulates
FOSL1	Up	FXYD2	Down	Regulates
FOSL1	Up	GPSM3	Up	Regulates
FOSL1	Up	GREB1	Up	Regulates
FOSL1	Up	HBEGF	Up	Regulates
FOSL1	Up	H1-2	Down	Regulates
FOSL1	Up	H2AC6	Down	Regulates
FOSL1	Up	H2BC4	Down	Regulates
FOSL1	Up	H2BC5	Down	Regulates
FOSL1	Up	H4C8	Down	Regulates
FOSL1	Up	HSH2D	Up	Regulates
FOSL1	Up	HTR1D	Up	Regulates
FOSL1	Up	ICAM4	Down	Regulates
FOSL1	Up	IL1B	Up	Regulates
FOSL1	Up	IL6ST	Down	Regulates
FOSL1	Up	IQCD	Down	Regulates
FOSL1	Up	JMJD1C	Down	Regulates
FOSL1	Up	KCNMA1	Down	Regulates
FOSL1	Up	RESF1	Down	Regulates
FOSL1	Up	KLF2	Up	Regulates
FOSL1	Up	KRT15	Up	Regulates
FOSL1	Up	LGALS4	Up	Regulates
FOSL1	Up	LIPH	Down	Regulates
FOSL1	Up	LYL1	Up	Regulates
FOSL1	Up	LYNX1	Down	Regulates
FOSL1	Up	MAP3K1	Down	Regulates
FOSL1	Up	MAP3K7CL	Up	Regulates
FOSL1	Up	MBNL2	Down	Regulates
FOSL1	Up	MDGA1	Down	Regulates
FOSL1	Up	MDK	Up	Regulates
FOSL1	Up	MXD1	Down	Regulates
FOSL1	Up	N4BP2	Down	Regulates
FOSL1	Up	NFAT5	Down	Regulates
FOSL1	Up	NLRP1	Up	Regulates
FOSL1	Up	NT5M	Up	Regulates
FOSL1	Up	NTSR1	Up	Regulates
FOSL1	Up	PBLD	Down	Regulates
FOSL1	Up	PDCD1LG2	Up	Regulates
FOSL1	Up	PDE2A	Up	Regulates
FOSL1	Up	PGF	Up	Regulates
FOSL1	Up	PGM2L1	Down	Regulates
FOSL1	Up	PIK3IP1	Down	Regulates
FOSL1	Up	PLAUR	Up	Regulates
FOSL1	Up	PMEPA1	Down	Regulates
FOSL1	Up	PSAT1	Up	Regulates
FOSL1	Up	PSD4	Down	Regulates
FOSL1	Up	PSTPIP2	Up	Regulates
FOSL1	Up	RAB17	Down	Regulates
FOSL1	Up	RAB3IL1	Up	Regulates
FOSL1	Up	RASGRF1	Up	Regulates
FOSL1	Up	RBM25	Down	Regulates
FOSL1	Up	REV3L	Down	Regulates
FOSL1	Up	ROBO4	Up	Regulates
FOSL1	Up	S100A3	Down	Regulates
FOSL1	Up	S100A4	Down	Regulates
FOSL1	Up	SAMD9	Down	Regulates
FOSL1	Up	SAT1	Down	Regulates
FOSL1	Up	SDSL	Up	Regulates
FOSL1	Up	SEMA3C	Down	Regulates
FOSL1	Up	SEMA7A	Up	Regulates
FOSL1	Up	SERPINE1	Up	Regulates
FOSL1	Up	SIRPB2	Up	Regulates
FOSL1	Up	SLC16A6	Up	Regulates
FOSL1	Up	SLC1A4	Up	Regulates
FOSL1	Up	SLC1A5	Up	Regulates
FOSL1	Up	SLC2A12	Down	Regulates
FOSL1	Up	SLC37A2	Up	Regulates
FOSL1	Up	SLC3A2	Up	Regulates
FOSL1	Up	SLC7A11	Up	Regulates
FOSL1	Up	SLC7A5	Up	Regulates
FOSL1	Up	SMAD6	Down	Regulates
FOSL1	Up	SNCG	Up	Regulates
FOSL1	Up	SNX29	Down	Regulates
FOSL1	Up	SP6	Up	Regulates
FOSL1	Up	SPOCD1	Up	Regulates
FOSL1	Up	SPTBN4	Up	Regulates
FOSL1	Up	SSPN	Down	Regulates
FOSL1	Up	STEAP1	Up	Regulates
FOSL1	Up	SYNE2	Down	Regulates
FOSL1	Up	SYNE3	Up	Regulates
FOSL1	Up	SYT12	Down	Regulates
FOSL1	Up	SYT8	Down	Regulates
FOSL1	Up	TGM4	Down	Regulates
FOSL1	Up	THBD	Up	Regulates
FOSL1	Up	TMEM80	Down	Regulates
FOSL1	Up	TMEM92	Up	Regulates
FOSL1	Up	TMIE	Up	Regulates
FOSL1	Up	TNFRSF17	Down	Regulates
FOSL1	Up	TNFSF14	Down	Regulates
FOSL1	Up	TNS4	Up	Regulates
FOSL1	Up	TRPM8	Down	Regulates
FOSL1	Up	TTC3	Down	Regulates
FOSL1	Up	UCN2	Down	Regulates
FOSL1	Up	UHRF1BP1L	Down	Regulates
FOSL1	Up	UPP1	Up	Regulates
FOSL1	Up	UTRN	Down	Regulates
FOSL1	Up	VSIG1	Down	Regulates
FOSL1	Up	VWA5A	Up	Regulates
FOSL1	Up	YARS1	Up	Regulates
FOSL1	Up	ZBED2	Down	Regulates
FOSL1	Up	ZBTB20	Down	Regulates
FOSL1	Up	ZNF652	Down	Regulates
HEY1	Up	BTBD19	Down	Regulates
HEY1	Up	ESCO1	Down	Regulates
HEY1	Up	GSDMA	Up	Regulates
HEY1	Up	H1-2	Down	Regulates
HEY1	Up	H2AC6	Down	Regulates
HEY1	Up	H2AC8	Down	Regulates
HEY1	Up	H2BC4	Down	Regulates
HEY1	Up	H2BC8	Down	Regulates
HEY1	Up	H3C6	Down	Regulates
HEY1	Up	H2BC21	Down	Regulates
HEY1	Up	MUC1	Down	Regulates
HEY1	Up	QPRT	Down	Regulates
HEY1	Up	RC3H1	Down	Regulates
HEY1	Up	SH2D2A	Up	Regulates
HEY1	Up	SLC1A5	Up	Regulates
HEY1	Up	SYNE2	Down	Regulates
HEY1	Up	TUBE1	Up	Regulates
JMJD1C	Down	ACHE	Up	Regulates
JMJD1C	Down	ADAM8	Up	Regulates
JMJD1C	Down	ADAMTS5	Down	Regulates
JMJD1C	Down	ADAMTS7	Down	Regulates
JMJD1C	Down	ADAMTSL4	Up	Regulates
JMJD1C	Down	ADAT3	Down	Regulates
JMJD1C	Down	ADM2	Up	Regulates
JMJD1C	Down	AGL	Down	Regulates
JMJD1C	Down	AHI1	Down	Regulates
JMJD1C	Down	AKR1B1	Down	Regulates
JMJD1C	Down	ALDH1L2	Up	Regulates
JMJD1C	Down	ALDH3B1	Up	Regulates
JMJD1C	Down	ALOX5AP	Up	Regulates
JMJD1C	Down	ALOXE3	Up	Regulates
JMJD1C	Down	ANK1	Down	Regulates
JMJD1C	Down	ANKRD2	Down	Regulates
JMJD1C	Down	ANKRD24	Up	Regulates
JMJD1C	Down	ARID4B	Down	Regulates
JMJD1C	Down	ARL15	Down	Regulates
JMJD1C	Down	ARSG	Up	Regulates
JMJD1C	Down	ASH1L	Down	Regulates
JMJD1C	Down	ASNS	Up	Regulates
JMJD1C	Down	ATF3	Up	Regulates
JMJD1C	Down	ATF4	Up	Regulates
JMJD1C	Down	ATRX	Down	Regulates
JMJD1C	Down	AVPR2	Up	Regulates
JMJD1C	Down	B3GNT3	Up	Regulates
JMJD1C	Down	BAZ1A	Down	Regulates
JMJD1C	Down	BAZ2B	Down	Regulates
JMJD1C	Down	BEGAIN	Up	Regulates
JMJD1C	Down	BMPR2	Down	Regulates
JMJD1C	Down	BTBD19	Down	Regulates
JMJD1C	Down	C15orf62	Down	Regulates
JMJD1C	Down	C16orf74	Up	Regulates
JMJD1C	Down	C1orf21	Up	Regulates
JMJD1C	Down	C6orf132	Up	Regulates
JMJD1C	Down	CACNB4	Down	Regulates
JMJD1C	Down	CARS1	Up	Regulates
JMJD1C	Down	CCDC146	Down	Regulates
JMJD1C	Down	CCDC92	Down	Regulates
JMJD1C	Down	CCL2	Down	Regulates
JMJD1C	Down	CCL20	Up	Regulates
JMJD1C	Down	CD22	Up	Regulates
JMJD1C	Down	CD274	Up	Regulates
JMJD1C	Down	CD2AP	Down	Regulates
JMJD1C	Down	CD68	Up	Regulates
JMJD1C	Down	CDC42EP5	Up	Regulates
JMJD1C	Down	CDH16	Down	Regulates
JMJD1C	Down	CDH3	Up	Regulates
JMJD1C	Down	CDH5	Down	Regulates
JMJD1C	Down	CDK18	Up	Regulates
JMJD1C	Down	CDKN1C	Up	Regulates
JMJD1C	Down	CEP162	Down	Regulates
JMJD1C	Down	CEP350	Down	Regulates
JMJD1C	Down	CHAC1	Up	Regulates
JMJD1C	Down	CHD5	Up	Regulates
JMJD1C	Down	CITED4	Down	Regulates
JMJD1C	Down	CKLF	Down	Regulates
JMJD1C	Down	CLDN1	Down	Regulates
JMJD1C	Down	CLDN4	Down	Regulates
JMJD1C	Down	CMTM1	Down	Regulates
JMJD1C	Down	COL13A1	Up	Regulates
JMJD1C	Down	COL7A1	Down	Regulates
JMJD1C	Down	CORO1A	Up	Regulates
JMJD1C	Down	CORO2B	Up	Regulates
JMJD1C	Down	CPED1	Up	Regulates
JMJD1C	Down	CREBRF	Down	Regulates
JMJD1C	Down	CYB5R2	Up	Regulates
JMJD1C	Down	DACT3	Up	Regulates
JMJD1C	Down	DDIT3	Up	Regulates
JMJD1C	Down	DDN	Up	Regulates
JMJD1C	Down	DGKH	Down	Regulates
JMJD1C	Down	DKKL1	Up	Regulates
JMJD1C	Down	DMC1	Up	Regulates
JMJD1C	Down	DNAH17	Down	Regulates
JMJD1C	Down	DNAJB14	Down	Regulates
JMJD1C	Down	DNAJC13	Down	Regulates
JMJD1C	Down	DOCK2	Down	Regulates
JMJD1C	Down	DOK3	Down	Regulates
JMJD1C	Down	DST	Down	Regulates
JMJD1C	Down	DUSP15	Up	Regulates
JMJD1C	Down	ECM1	Up	Regulates
JMJD1C	Down	EFCAB2	Down	Regulates
JMJD1C	Down	EFNA1	Down	Regulates
JMJD1C	Down	EIF4EBP1	Up	Regulates
JMJD1C	Down	ERCC6L2	Down	Regulates
JMJD1C	Down	ESCO1	Down	Regulates
JMJD1C	Down	ETNK1	Down	Regulates
JMJD1C	Down	EYS	Down	Regulates
JMJD1C	Down	F3	Up	Regulates
JMJD1C	Down	FA2H	Up	Regulates
JMJD1C	Down	FAM107B	Up	Regulates
JMJD1C	Down	FAM135A	Down	Regulates
JMJD1C	Down	FAM167A	Up	Regulates
JMJD1C	Down	FAM214A	Down	Regulates
JMJD1C	Down	FAR2	Down	Regulates
JMJD1C	Down	FAXDC2	Down	Regulates
JMJD1C	Down	FER	Down	Regulates
JMJD1C	Down	FMNL1	Up	Regulates
JMJD1C	Down	FOSL1	Up	Regulates
JMJD1C	Down	FRMD4A	Down	Regulates
JMJD1C	Down	FUT1	Up	Regulates
JMJD1C	Down	FXYD2	Down	Regulates
JMJD1C	Down	GAB1	Down	Regulates
JMJD1C	Down	GJB7	Down	Regulates
JMJD1C	Down	GPCPD1	Up	Regulates
JMJD1C	Down	GPSM3	Up	Regulates
JMJD1C	Down	GREB1	Up	Regulates
JMJD1C	Down	GSDMA	Up	Regulates
JMJD1C	Down	HBEGF	Up	Regulates
JMJD1C	Down	HES2	Up	Regulates
JMJD1C	Down	HEY1	Up	Regulates
JMJD1C	Down	H1-2	Down	Regulates
JMJD1C	Down	H2AC6	Down	Regulates
JMJD1C	Down	H2AC8	Down	Regulates
JMJD1C	Down	H2AC11	Down	Regulates
JMJD1C	Down	H2AC13	Down	Regulates
JMJD1C	Down	H2BC4	Down	Regulates
JMJD1C	Down	H2BC5	Down	Regulates
JMJD1C	Down	H2BC8	Down	Regulates
JMJD1C	Down	H2BC9	Up	Regulates
JMJD1C	Down	H2BC11	Down	Regulates
JMJD1C	Down	H2BC12	Down	Regulates
JMJD1C	Down	H2BC15	Down	Regulates
JMJD1C	Down	H3C6	Down	Regulates
JMJD1C	Down	H3C8	Down	Regulates
JMJD1C	Down	H3C10	Down	Regulates
JMJD1C	Down	H4C8	Down	Regulates
JMJD1C	Down	H2BC21	Down	Regulates
JMJD1C	Down	HMGN5	Down	Regulates
JMJD1C	Down	HSD17B6	Up	Regulates
JMJD1C	Down	HSH2D	Up	Regulates
JMJD1C	Down	HTR1D	Up	Regulates
JMJD1C	Down	ICAM4	Down	Regulates
JMJD1C	Down	ID2	Up	Regulates
JMJD1C	Down	IGIP	Down	Regulates
JMJD1C	Down	IGSF10	Down	Regulates
JMJD1C	Down	IL1B	Up	Regulates
JMJD1C	Down	IL6ST	Down	Regulates
JMJD1C	Down	INHBE	Up	Regulates
JMJD1C	Down	INO80D	Down	Regulates
JMJD1C	Down	IQCD	Down	Regulates
JMJD1C	Down	IRAK3	Down	Regulates
JMJD1C	Down	JAK3	Up	Regulates
JMJD1C	Down	JDP2	Up	Regulates
JMJD1C	Down	JMJD1C	Down	Regulates
JMJD1C	Down	KANK3	Up	Regulates
JMJD1C	Down	KAT6B	Down	Regulates
JMJD1C	Down	KBTBD11	Up	Regulates
JMJD1C	Down	KCNMA1	Down	Regulates
JMJD1C	Down	KCNQ4	Up	Regulates
JMJD1C	Down	KIAA1109	Down	Regulates
JMJD1C	Down	ELAPOR1	Down	Regulates
JMJD1C	Down	RESF1	Down	Regulates
JMJD1C	Down	KIAA2026	Down	Regulates
JMJD1C	Down	KIF21A	Down	Regulates
JMJD1C	Down	KIF21B	Up	Regulates
JMJD1C	Down	KLF2	Up	Regulates
JMJD1C	Down	KLRC4	Down	Regulates
JMJD1C	Down	LCP1	Up	Regulates
JMJD1C	Down	LHX6	Up	Regulates
JMJD1C	Down	LIPC	Down	Regulates
JMJD1C	Down	LMO4	Up	Regulates
JMJD1C	Down	LRG1	Up	Regulates
JMJD1C	Down	LRP3	Up	Regulates
JMJD1C	Down	LRRN4	Down	Regulates
JMJD1C	Down	LTB	Down	Regulates
JMJD1C	Down	LYL1	Up	Regulates
JMJD1C	Down	LYPD3	Up	Regulates
JMJD1C	Down	MAP3K1	Down	Regulates
JMJD1C	Down	MAP3K7CL	Up	Regulates
JMJD1C	Down	MARS1	Up	Regulates
JMJD1C	Down	MATK	Up	Regulates
JMJD1C	Down	MATN4	Up	Regulates
JMJD1C	Down	MBNL2	Down	Regulates
JMJD1C	Down	MDFI	Up	Regulates
JMJD1C	Down	MDGA1	Down	Regulates
JMJD1C	Down	MDK	Up	Regulates
JMJD1C	Down	MGARP	Down	Regulates
JMJD1C	Down	MKLN1	Down	Regulates
JMJD1C	Down	MMP9	Up	Regulates
JMJD1C	Down	MPZL3	Up	Regulates
JMJD1C	Down	MTHFD2	Up	Regulates
JMJD1C	Down	MUC1	Down	Regulates
JMJD1C	Down	MXD1	Down	Regulates
JMJD1C	Down	MYCL	Up	Regulates
JMJD1C	Down	MYO7A	Down	Regulates
JMJD1C	Down	N4BP2	Down	Regulates
JMJD1C	Down	NAT16	Up	Regulates
JMJD1C	Down	NDUFA4L2	Up	Regulates
JMJD1C	Down	NEGR1	Down	Regulates
JMJD1C	Down	NEK11	Down	Regulates
JMJD1C	Down	NEURL3	Down	Regulates
JMJD1C	Down	NFAT5	Down	Regulates
JMJD1C	Down	NIPAL2	Down	Regulates
JMJD1C	Down	NIPBL	Down	Regulates
JMJD1C	Down	NKD1	Up	Regulates
JMJD1C	Down	NLRP1	Up	Regulates
JMJD1C	Down	NLRP3	Up	Regulates
JMJD1C	Down	NOS3	Up	Regulates
JMJD1C	Down	NPAT	Down	Regulates
JMJD1C	Down	NPHS1	Down	Regulates
JMJD1C	Down	NPTXR	Down	Regulates
JMJD1C	Down	NR3C2	Up	Regulates
JMJD1C	Down	NREP	Down	Regulates
JMJD1C	Down	NT5M	Up	Regulates
JMJD1C	Down	NTNG2	Up	Regulates
JMJD1C	Down	NTSR1	Up	Regulates
JMJD1C	Down	OGDHL	Up	Regulates
JMJD1C	Down	OSGIN1	Up	Regulates
JMJD1C	Down	PBLD	Down	Regulates
JMJD1C	Down	PCK2	Up	Regulates
JMJD1C	Down	PDE2A	Up	Regulates
JMJD1C	Down	PDE6B	Down	Regulates
JMJD1C	Down	PGAP1	Down	Regulates
JMJD1C	Down	PGF	Up	Regulates
JMJD1C	Down	PGM2L1	Down	Regulates
JMJD1C	Down	PHGDH	Up	Regulates
JMJD1C	Down	PIBF1	Down	Regulates
JMJD1C	Down	PIK3IP1	Down	Regulates
JMJD1C	Down	PLA2G4B	Down	Regulates
JMJD1C	Down	PLAUR	Up	Regulates
JMJD1C	Down	PLXNB3	Up	Regulates
JMJD1C	Down	PMEPA1	Down	Regulates
JMJD1C	Down	PMFBP1	Down	Regulates
JMJD1C	Down	PPP2R2C	Up	Regulates
JMJD1C	Down	PRR19	Down	Regulates
JMJD1C	Down	PSAT1	Up	Regulates
JMJD1C	Down	PSD3	Down	Regulates
JMJD1C	Down	PSD4	Down	Regulates
JMJD1C	Down	PSTPIP2	Up	Regulates
JMJD1C	Down	PTAFR	Up	Regulates
JMJD1C	Down	PTGFRN	Up	Regulates
JMJD1C	Down	PTPRG	Down	Regulates
JMJD1C	Down	QPRT	Down	Regulates
JMJD1C	Down	RAB11FIP4	Up	Regulates
JMJD1C	Down	RAB17	Down	Regulates
JMJD1C	Down	RAB3IL1	Up	Regulates
JMJD1C	Down	RASGRF1	Up	Regulates
JMJD1C	Down	RASGRP2	Up	Regulates
JMJD1C	Down	RBM25	Down	Regulates
JMJD1C	Down	RC3H1	Down	Regulates
JMJD1C	Down	REL	Down	Regulates
JMJD1C	Down	REV3L	Down	Regulates
JMJD1C	Down	RGS2	Up	Regulates
JMJD1C	Down	RHOB	Down	Regulates
JMJD1C	Down	RSF1	Down	Regulates
JMJD1C	Down	S100A3	Down	Regulates
JMJD1C	Down	S100A4	Down	Regulates
JMJD1C	Down	SAMSN1	Up	Regulates
JMJD1C	Down	SAT1	Down	Regulates
JMJD1C	Down	SCAF11	Down	Regulates
JMJD1C	Down	SCN1B	Up	Regulates
JMJD1C	Down	SDSL	Up	Regulates
JMJD1C	Down	SEMA3C	Down	Regulates
JMJD1C	Down	SEMA7A	Up	Regulates
JMJD1C	Down	SERPINE1	Up	Regulates
JMJD1C	Down	SETX	Down	Regulates
JMJD1C	Down	SGK2	Down	Regulates
JMJD1C	Down	SH2D2A	Up	Regulates
JMJD1C	Down	SIRPB2	Up	Regulates
JMJD1C	Down	SKIL	Down	Regulates
JMJD1C	Down	SLC16A6	Up	Regulates
JMJD1C	Down	SLC16A9	Up	Regulates
JMJD1C	Down	SLC1A4	Up	Regulates
JMJD1C	Down	SLC1A5	Up	Regulates
JMJD1C	Down	SLC37A1	Up	Regulates
JMJD1C	Down	SLC37A2	Up	Regulates
JMJD1C	Down	SLC3A2	Up	Regulates
JMJD1C	Down	SLC44A2	Up	Regulates
JMJD1C	Down	SLC5A3	Down	Regulates
JMJD1C	Down	SLC6A16	Down	Regulates
JMJD1C	Down	SLC7A11	Up	Regulates
JMJD1C	Down	SLC7A5	Up	Regulates
JMJD1C	Down	SLC7A6	Down	Regulates
JMJD1C	Down	SMAD6	Down	Regulates
JMJD1C	Down	SNCG	Up	Regulates
JMJD1C	Down	SNX29	Down	Regulates
JMJD1C	Down	SP6	Up	Regulates
JMJD1C	Down	SPOCD1	Up	Regulates
JMJD1C	Down	SPTBN4	Up	Regulates
JMJD1C	Down	SREK1	Down	Regulates
JMJD1C	Down	SSPN	Down	Regulates
JMJD1C	Down	STARD4	Down	Regulates
JMJD1C	Down	STARD6	Up	Regulates
JMJD1C	Down	STEAP1	Up	Regulates
JMJD1C	Down	SYDE2	Down	Regulates
JMJD1C	Down	SYNE2	Down	Regulates
JMJD1C	Down	SYNE3	Up	Regulates
JMJD1C	Down	SYNGR4	Up	Regulates
JMJD1C	Down	SYT12	Down	Regulates
JMJD1C	Down	SYT8	Down	Regulates
JMJD1C	Down	TAOK1	Down	Regulates
JMJD1C	Down	TCEA3	Up	Regulates
JMJD1C	Down	TET2	Down	Regulates
JMJD1C	Down	THBD	Up	Regulates
JMJD1C	Down	TM6SF1	Up	Regulates
JMJD1C	Down	TMEM80	Down	Regulates
JMJD1C	Down	TMEM92	Up	Regulates
JMJD1C	Down	TMIE	Up	Regulates
JMJD1C	Down	TMTC3	Down	Regulates
JMJD1C	Down	TNFAIP6	Down	Regulates
JMJD1C	Down	TNFSF14	Down	Regulates
JMJD1C	Down	TNFSF15	Down	Regulates
JMJD1C	Down	TNS4	Up	Regulates
JMJD1C	Down	TP53I11	Up	Regulates
JMJD1C	Down	TRIB2	Down	Regulates
JMJD1C	Down	TRIM2	Down	Regulates
JMJD1C	Down	TTC3	Down	Regulates
JMJD1C	Down	TTYH2	Up	Regulates
JMJD1C	Down	UCN2	Down	Regulates
JMJD1C	Down	UHRF1BP1L	Down	Regulates
JMJD1C	Down	UPP1	Up	Regulates
JMJD1C	Down	USP34	Down	Regulates
JMJD1C	Down	UTRN	Down	Regulates
JMJD1C	Down	VPS13A	Down	Regulates
JMJD1C	Down	VPS13B	Down	Regulates
JMJD1C	Down	VPS13C	Down	Regulates
JMJD1C	Down	VWA5A	Up	Regulates
JMJD1C	Down	WNT11	Up	Regulates
JMJD1C	Down	YARS1	Up	Regulates
JMJD1C	Down	ZBED6	Down	Regulates
JMJD1C	Down	ZBTB20	Down	Regulates
JMJD1C	Down	ZHX1-C8orf76	Down	Regulates
JMJD1C	Down	ZNF185	Up	Regulates
JMJD1C	Down	ZNF385C	Up	Regulates
JMJD1C	Down	ZNF407	Down	Regulates
JMJD1C	Down	ZNF652	Down	Regulates
LYL1	Up	ADAM8	Up	Regulates
LYL1	Up	ADAMTS7	Down	Regulates
LYL1	Up	ADAMTSL4	Up	Regulates
LYL1	Up	ADAT3	Down	Regulates
LYL1	Up	AHI1	Down	Regulates
LYL1	Up	ALOX5AP	Up	Regulates
LYL1	Up	ANK1	Down	Regulates
LYL1	Up	ARSG	Up	Regulates
LYL1	Up	ASNS	Up	Regulates
LYL1	Up	ATF3	Up	Regulates
LYL1	Up	AVPR2	Up	Regulates
LYL1	Up	BTBD19	Down	Regulates
LYL1	Up	C15orf62	Down	Regulates
LYL1	Up	CARS1	Up	Regulates
LYL1	Up	CD22	Up	Regulates
LYL1	Up	CDH5	Down	Regulates
LYL1	Up	CITED4	Down	Regulates
LYL1	Up	COL7A1	Down	Regulates
LYL1	Up	CORO1A	Up	Regulates
LYL1	Up	DNAJB14	Down	Regulates
LYL1	Up	DOK3	Down	Regulates
LYL1	Up	FAM107B	Up	Regulates
LYL1	Up	FAM214A	Down	Regulates
LYL1	Up	FAR2	Down	Regulates
LYL1	Up	FMNL1	Up	Regulates
LYL1	Up	FNDC5	Up	Regulates
LYL1	Up	FOSL1	Up	Regulates
LYL1	Up	FRMD4A	Down	Regulates
LYL1	Up	GAB1	Down	Regulates
LYL1	Up	HBEGF	Up	Regulates
LYL1	Up	H2AC8	Down	Regulates
LYL1	Up	H2BC8	Down	Regulates
LYL1	Up	H3C6	Down	Regulates
LYL1	Up	H4C8	Down	Regulates
LYL1	Up	HSH2D	Up	Regulates
LYL1	Up	ICAM4	Down	Regulates
LYL1	Up	IL1B	Up	Regulates
LYL1	Up	IQCD	Down	Regulates
LYL1	Up	JAK3	Up	Regulates
LYL1	Up	ELAPOR1	Down	Regulates
LYL1	Up	KIF21B	Up	Regulates
LYL1	Up	KLF2	Up	Regulates
LYL1	Up	LCP1	Up	Regulates
LYL1	Up	LRP3	Up	Regulates
LYL1	Up	LTB	Down	Regulates
LYL1	Up	LYL1	Up	Regulates
LYL1	Up	MAP3K1	Down	Regulates
LYL1	Up	MAP3K7CL	Up	Regulates
LYL1	Up	MDFI	Up	Regulates
LYL1	Up	MDGA1	Down	Regulates
LYL1	Up	MTHFD2	Up	Regulates
LYL1	Up	MUC1	Down	Regulates
LYL1	Up	NEGR1	Down	Regulates
LYL1	Up	NFAT5	Down	Regulates
LYL1	Up	NIPAL2	Down	Regulates
LYL1	Up	NLRP3	Up	Regulates
LYL1	Up	NOS3	Up	Regulates
LYL1	Up	NT5M	Up	Regulates
LYL1	Up	NTNG2	Up	Regulates
LYL1	Up	PCK2	Up	Regulates
LYL1	Up	PIBF1	Down	Regulates
LYL1	Up	PLAUR	Up	Regulates
LYL1	Up	PRR19	Down	Regulates
LYL1	Up	PSD3	Down	Regulates
LYL1	Up	PSD4	Down	Regulates
LYL1	Up	PTAFR	Up	Regulates
LYL1	Up	PTPRG	Down	Regulates
LYL1	Up	QPRT	Down	Regulates
LYL1	Up	RAB11FIP4	Up	Regulates
LYL1	Up	RASGRP2	Up	Regulates
LYL1	Up	RGS2	Up	Regulates
LYL1	Up	S100A4	Down	Regulates
LYL1	Up	SAT1	Down	Regulates
LYL1	Up	SCN1B	Up	Regulates
LYL1	Up	SEMA7A	Up	Regulates
LYL1	Up	SH2D2A	Up	Regulates
LYL1	Up	SLC1A4	Up	Regulates
LYL1	Up	SLC1A5	Up	Regulates
LYL1	Up	SLC37A1	Up	Regulates
LYL1	Up	SLC37A2	Up	Regulates
LYL1	Up	SYNE3	Up	Regulates
LYL1	Up	SYNGR4	Up	Regulates
LYL1	Up	SYT12	Down	Regulates
LYL1	Up	TP53I11	Up	Regulates
LYL1	Up	UCN2	Down	Regulates
LYL1	Up	USP34	Down	Regulates
LYL1	Up	UTRN	Down	Regulates
LYL1	Up	VPS13B	Down	Regulates
LYL1	Up	YARS1	Up	Regulates
LYL1	Up	ZHX1-C8orf76	Down	Regulates
LYL1	Up	ZNF652	Down	Regulates
MAF	Down	ACBD7	Up	Regulates
MAF	Down	ACHE	Up	Regulates
MAF	Down	ADAM8	Up	Regulates
MAF	Down	ADAMTSL4	Up	Regulates
MAF	Down	ADAT3	Down	Regulates
MAF	Down	ADM2	Up	Regulates
MAF	Down	AGL	Down	Regulates
MAF	Down	AHI1	Down	Regulates
MAF	Down	AKR1B1	Down	Regulates
MAF	Down	ALDH3B1	Up	Regulates
MAF	Down	ALOX5AP	Up	Regulates
MAF	Down	ALOXE3	Up	Regulates
MAF	Down	ANK1	Down	Regulates
MAF	Down	ANKRD24	Up	Regulates
MAF	Down	ARID4B	Down	Regulates
MAF	Down	ARL15	Down	Regulates
MAF	Down	ARL4C	Down	Regulates
MAF	Down	ARSG	Up	Regulates
MAF	Down	ASH1L	Down	Regulates
MAF	Down	ASNS	Up	Regulates
MAF	Down	ATF3	Up	Regulates
MAF	Down	ATF4	Up	Regulates
MAF	Down	ATRX	Down	Regulates
MAF	Down	AVPR2	Up	Regulates
MAF	Down	B3GNT3	Up	Regulates
MAF	Down	BAZ1A	Down	Regulates
MAF	Down	BAZ2B	Down	Regulates
MAF	Down	BEGAIN	Up	Regulates
MAF	Down	BMPR2	Down	Regulates
MAF	Down	BTBD19	Down	Regulates
MAF	Down	C15orf62	Down	Regulates
MAF	Down	C1orf21	Up	Regulates
MAF	Down	CARS1	Up	Regulates
MAF	Down	CCDC146	Down	Regulates
MAF	Down	CCDC92	Down	Regulates
MAF	Down	CD274	Up	Regulates
MAF	Down	CD2AP	Down	Regulates
MAF	Down	CD68	Up	Regulates
MAF	Down	CDC42EP5	Up	Regulates
MAF	Down	CDH16	Down	Regulates
MAF	Down	CDKN1C	Up	Regulates
MAF	Down	CEP162	Down	Regulates
MAF	Down	CEP350	Down	Regulates
MAF	Down	CHAC1	Up	Regulates
MAF	Down	CHD5	Up	Regulates
MAF	Down	CHIC1	Down	Regulates
MAF	Down	CITED4	Down	Regulates
MAF	Down	CKLF	Down	Regulates
MAF	Down	CLDN4	Down	Regulates
MAF	Down	CMTM1	Down	Regulates
MAF	Down	COL7A1	Down	Regulates
MAF	Down	CORO1A	Up	Regulates
MAF	Down	CREBRF	Down	Regulates
MAF	Down	DACT3	Up	Regulates
MAF	Down	DDIT3	Up	Regulates
MAF	Down	DGKH	Down	Regulates
MAF	Down	DKKL1	Up	Regulates
MAF	Down	DMC1	Up	Regulates
MAF	Down	DNAH17	Down	Regulates
MAF	Down	DNAJB14	Down	Regulates
MAF	Down	DNAJC13	Down	Regulates
MAF	Down	DOCK2	Down	Regulates
MAF	Down	DOK3	Down	Regulates
MAF	Down	DST	Down	Regulates
MAF	Down	ECM1	Up	Regulates
MAF	Down	EFCAB2	Down	Regulates
MAF	Down	EFNA1	Down	Regulates
MAF	Down	EIF4E3	Up	Regulates
MAF	Down	EIF4EBP1	Up	Regulates
MAF	Down	ENDOD1	Up	Regulates
MAF	Down	ERCC6L2	Down	Regulates
MAF	Down	ESCO1	Down	Regulates
MAF	Down	ETNK1	Down	Regulates
MAF	Down	EXPH5	Down	Regulates
MAF	Down	F3	Up	Regulates
MAF	Down	FA2H	Up	Regulates
MAF	Down	FAM107B	Up	Regulates
MAF	Down	FAM135A	Down	Regulates
MAF	Down	FAM167A	Up	Regulates
MAF	Down	FAM214A	Down	Regulates
MAF	Down	FAR2	Down	Regulates
MAF	Down	FAXDC2	Down	Regulates
MAF	Down	FER	Down	Regulates
MAF	Down	FMNL1	Up	Regulates
MAF	Down	FOSL1	Up	Regulates
MAF	Down	GJB7	Down	Regulates
MAF	Down	GPCPD1	Up	Regulates
MAF	Down	GPR137C	Down	Regulates
MAF	Down	GPSM3	Up	Regulates
MAF	Down	GSDMA	Up	Regulates
MAF	Down	MACROH2A2	Up	Regulates
MAF	Down	H1-2	Down	Regulates
MAF	Down	H2AC6	Down	Regulates
MAF	Down	H2AC8	Down	Regulates
MAF	Down	H2AC11	Down	Regulates
MAF	Down	H2AC13	Down	Regulates
MAF	Down	H2BC4	Down	Regulates
MAF	Down	H2BC5	Down	Regulates
MAF	Down	H2BC8	Down	Regulates
MAF	Down	H2BC9	Up	Regulates
MAF	Down	H2BC11	Down	Regulates
MAF	Down	H2BC12	Down	Regulates
MAF	Down	H2BC15	Down	Regulates
MAF	Down	H3C6	Down	Regulates
MAF	Down	H3C8	Down	Regulates
MAF	Down	H3C10	Down	Regulates
MAF	Down	H4C8	Down	Regulates
MAF	Down	H2BC21	Down	Regulates
MAF	Down	HMGN5	Down	Regulates
MAF	Down	HSD17B6	Up	Regulates
MAF	Down	HSH2D	Up	Regulates
MAF	Down	ICAM4	Down	Regulates
MAF	Down	ID2	Up	Regulates
MAF	Down	IL11	Up	Regulates
MAF	Down	IL6ST	Down	Regulates
MAF	Down	INHBE	Up	Regulates
MAF	Down	INO80D	Down	Regulates
MAF	Down	IQCD	Down	Regulates
MAF	Down	JAK3	Up	Regulates
MAF	Down	JMJD1C	Down	Regulates
MAF	Down	KANK3	Up	Regulates
MAF	Down	KAT6B	Down	Regulates
MAF	Down	KCNQ4	Up	Regulates
MAF	Down	KIAA1109	Down	Regulates
MAF	Down	ELAPOR1	Down	Regulates
MAF	Down	RESF1	Down	Regulates
MAF	Down	KIAA2026	Down	Regulates
MAF	Down	KIF21A	Down	Regulates
MAF	Down	KIF21B	Up	Regulates
MAF	Down	KLF2	Up	Regulates
MAF	Down	KSR2	Down	Regulates
MAF	Down	LCP1	Up	Regulates
MAF	Down	LIPC	Down	Regulates
MAF	Down	LMO4	Up	Regulates
MAF	Down	LRP3	Up	Regulates
MAF	Down	LTB	Down	Regulates
MAF	Down	LYL1	Up	Regulates
MAF	Down	LYPD3	Up	Regulates
MAF	Down	MAF	Down	Regulates
MAF	Down	MAP1A	Up	Regulates
MAF	Down	MAP3K1	Down	Regulates
MAF	Down	MAP3K7CL	Up	Regulates
MAF	Down	MARS1	Up	Regulates
MAF	Down	MBNL2	Down	Regulates
MAF	Down	MDGA1	Down	Regulates
MAF	Down	MDK	Up	Regulates
MAF	Down	MGARP	Down	Regulates
MAF	Down	MKLN1	Down	Regulates
MAF	Down	MPZL3	Up	Regulates
MAF	Down	MTHFD2	Up	Regulates
MAF	Down	MUC1	Down	Regulates
MAF	Down	MXD1	Down	Regulates
MAF	Down	N4BP2	Down	Regulates
MAF	Down	NAT16	Up	Regulates
MAF	Down	NDUFA4L2	Up	Regulates
MAF	Down	NEK11	Down	Regulates
MAF	Down	NEURL3	Down	Regulates
MAF	Down	NFAT5	Down	Regulates
MAF	Down	NIPBL	Down	Regulates
MAF	Down	NKD1	Up	Regulates
MAF	Down	NLRP1	Up	Regulates
MAF	Down	NOS3	Up	Regulates
MAF	Down	NPAT	Down	Regulates
MAF	Down	NPHS1	Down	Regulates
MAF	Down	NPTXR	Down	Regulates
MAF	Down	NR3C2	Up	Regulates
MAF	Down	NREP	Down	Regulates
MAF	Down	NT5M	Up	Regulates
MAF	Down	NTNG2	Up	Regulates
MAF	Down	PBLD	Down	Regulates
MAF	Down	PCK2	Up	Regulates
MAF	Down	PDE2A	Up	Regulates
MAF	Down	PDE6B	Down	Regulates
MAF	Down	PGAP1	Down	Regulates
MAF	Down	PGM2L1	Down	Regulates
MAF	Down	PHGDH	Up	Regulates
MAF	Down	PIBF1	Down	Regulates
MAF	Down	PIK3IP1	Down	Regulates
MAF	Down	PLA2G4B	Down	Regulates
MAF	Down	PLAUR	Up	Regulates
MAF	Down	PMEPA1	Down	Regulates
MAF	Down	PPP1R3F	Down	Regulates
MAF	Down	PRR19	Down	Regulates
MAF	Down	PSAT1	Up	Regulates
MAF	Down	PSD4	Down	Regulates
MAF	Down	PSTPIP2	Up	Regulates
MAF	Down	PTGFRN	Up	Regulates
MAF	Down	PTPRG	Down	Regulates
MAF	Down	QPRT	Down	Regulates
MAF	Down	RAB11FIP4	Up	Regulates
MAF	Down	RASGRP1	Down	Regulates
MAF	Down	RASGRP2	Up	Regulates
MAF	Down	RBM25	Down	Regulates
MAF	Down	RC3H1	Down	Regulates
MAF	Down	REL	Down	Regulates
MAF	Down	REV3L	Down	Regulates
MAF	Down	RGS2	Up	Regulates
MAF	Down	RHOB	Down	Regulates
MAF	Down	RSF1	Down	Regulates
MAF	Down	S100A3	Down	Regulates
MAF	Down	S100A4	Down	Regulates
MAF	Down	SAMD9	Down	Regulates
MAF	Down	SAMSN1	Up	Regulates
MAF	Down	SAT1	Down	Regulates
MAF	Down	SCAF11	Down	Regulates
MAF	Down	SCN1B	Up	Regulates
MAF	Down	SEMA7A	Up	Regulates
MAF	Down	SERPINE1	Up	Regulates
MAF	Down	SERPINE2	Up	Regulates
MAF	Down	SETX	Down	Regulates
MAF	Down	SH2D2A	Up	Regulates
MAF	Down	SKIL	Down	Regulates
MAF	Down	SLC16A14	Up	Regulates
MAF	Down	SLC16A6	Up	Regulates
MAF	Down	SLC16A9	Up	Regulates
MAF	Down	SLC1A4	Up	Regulates
MAF	Down	SLC1A5	Up	Regulates
MAF	Down	SLC37A1	Up	Regulates
MAF	Down	SLC3A2	Up	Regulates
MAF	Down	SLC44A2	Up	Regulates
MAF	Down	SLC5A3	Down	Regulates
MAF	Down	SLC6A16	Down	Regulates
MAF	Down	SLC7A11	Up	Regulates
MAF	Down	SLC7A5	Up	Regulates
MAF	Down	SLC7A6	Down	Regulates
MAF	Down	SMAD6	Down	Regulates
MAF	Down	SNX29	Down	Regulates
MAF	Down	SPTBN4	Up	Regulates
MAF	Down	SREK1	Down	Regulates
MAF	Down	STARD4	Down	Regulates
MAF	Down	STARD6	Up	Regulates
MAF	Down	SYDE2	Down	Regulates
MAF	Down	SYNE2	Down	Regulates
MAF	Down	SYNGR4	Up	Regulates
MAF	Down	SYT8	Down	Regulates
MAF	Down	TAOK1	Down	Regulates
MAF	Down	TET2	Down	Regulates
MAF	Down	TM6SF1	Up	Regulates
MAF	Down	TMEM80	Down	Regulates
MAF	Down	TMIE	Up	Regulates
MAF	Down	TMTC3	Down	Regulates
MAF	Down	TNS4	Up	Regulates
MAF	Down	TP53I11	Up	Regulates
MAF	Down	TPPP	Up	Regulates
MAF	Down	TRIB2	Down	Regulates
MAF	Down	TRIM2	Down	Regulates
MAF	Down	TTC3	Down	Regulates
MAF	Down	TTYH2	Up	Regulates
MAF	Down	TUBE1	Up	Regulates
MAF	Down	UCN2	Down	Regulates
MAF	Down	UHRF1BP1L	Down	Regulates
MAF	Down	UPP1	Up	Regulates
MAF	Down	USP34	Down	Regulates
MAF	Down	UTRN	Down	Regulates
MAF	Down	VPS13A	Down	Regulates
MAF	Down	VPS13B	Down	Regulates
MAF	Down	VPS13C	Down	Regulates
MAF	Down	VWA5A	Up	Regulates
MAF	Down	YARS1	Up	Regulates
MAF	Down	ZBED2	Down	Regulates
MAF	Down	ZBED6	Down	Regulates
MAF	Down	ZBTB20	Down	Regulates
MAF	Down	ZHX1-C8orf76	Down	Regulates
MAF	Down	ZNF185	Up	Regulates
MAF	Down	ZNF385C	Up	Regulates
MAF	Down	ZNF407	Down	Regulates
MAF	Down	ZNF433	Up	Regulates
MAF	Down	ZNF652	Down	Regulates
MAF	Down	ZNF708	Down	Regulates
MAF	Down	ZNF713	Down	Regulates
MAF	Down	ZNF844	Up	Regulates
MAF	Down	ZNF888	Down	Regulates
NFAT5	Down	ANKRD24	Up	Regulates
NFAT5	Down	ATF3	Up	Regulates
NFAT5	Down	C15orf62	Down	Regulates
NFAT5	Down	COL17A1	Up	Regulates
NFAT5	Down	MKLN1	Down	Regulates
NFAT5	Down	MUC1	Down	Regulates
NFAT5	Down	PLAUR	Up	Regulates
NFAT5	Down	S100A3	Down	Regulates
NFAT5	Down	S100A4	Down	Regulates
NFAT5	Down	SLC7A6	Down	Regulates
NIPBL	Down	ADAM8	Up	Regulates
NIPBL	Down	ARID4B	Down	Regulates
NIPBL	Down	ARRDC4	Up	Regulates
NIPBL	Down	ASH1L	Down	Regulates
NIPBL	Down	ATF3	Up	Regulates
NIPBL	Down	ATF4	Up	Regulates
NIPBL	Down	BAZ2B	Down	Regulates
NIPBL	Down	BTBD19	Down	Regulates
NIPBL	Down	C6orf141	Up	Regulates
NIPBL	Down	CCDC146	Down	Regulates
NIPBL	Down	CCDC92	Down	Regulates
NIPBL	Down	CD68	Up	Regulates
NIPBL	Down	CDH3	Up	Regulates
NIPBL	Down	CKLF	Down	Regulates
NIPBL	Down	COL17A1	Up	Regulates
NIPBL	Down	CREBRF	Down	Regulates
NIPBL	Down	DACT3	Up	Regulates
NIPBL	Down	DDIT3	Up	Regulates
NIPBL	Down	DKKL1	Up	Regulates
NIPBL	Down	DMC1	Up	Regulates
NIPBL	Down	DNAJB14	Down	Regulates
NIPBL	Down	DST	Down	Regulates
NIPBL	Down	DUSP15	Up	Regulates
NIPBL	Down	EFNA1	Down	Regulates
NIPBL	Down	EXPH5	Down	Regulates
NIPBL	Down	F3	Up	Regulates
NIPBL	Down	FA2H	Up	Regulates
NIPBL	Down	FAM107B	Up	Regulates
NIPBL	Down	FAM135A	Down	Regulates
NIPBL	Down	FAM214A	Down	Regulates
NIPBL	Down	FAXDC2	Down	Regulates
NIPBL	Down	FOSL1	Up	Regulates
NIPBL	Down	GPCPD1	Up	Regulates
NIPBL	Down	GPR137C	Down	Regulates
NIPBL	Down	GPSM3	Up	Regulates
NIPBL	Down	H1-2	Down	Regulates
NIPBL	Down	H2AC6	Down	Regulates
NIPBL	Down	H2AC8	Down	Regulates
NIPBL	Down	H2AC11	Down	Regulates
NIPBL	Down	H2BC4	Down	Regulates
NIPBL	Down	H2BC5	Down	Regulates
NIPBL	Down	H2BC8	Down	Regulates
NIPBL	Down	H2BC9	Up	Regulates
NIPBL	Down	H2BC11	Down	Regulates
NIPBL	Down	H2BC12	Down	Regulates
NIPBL	Down	H2BC15	Down	Regulates
NIPBL	Down	H3C6	Down	Regulates
NIPBL	Down	H3C8	Down	Regulates
NIPBL	Down	H4C8	Down	Regulates
NIPBL	Down	H2BC21	Down	Regulates
NIPBL	Down	ID2	Up	Regulates
NIPBL	Down	IL6ST	Down	Regulates
NIPBL	Down	INHBE	Up	Regulates
NIPBL	Down	INO80D	Down	Regulates
NIPBL	Down	IQCD	Down	Regulates
NIPBL	Down	JMJD1C	Down	Regulates
NIPBL	Down	KAT6B	Down	Regulates
NIPBL	Down	KIAA2026	Down	Regulates
NIPBL	Down	LGALS4	Up	Regulates
NIPBL	Down	LMO4	Up	Regulates
NIPBL	Down	LYNX1	Down	Regulates
NIPBL	Down	MAP1A	Up	Regulates
NIPBL	Down	MARS1	Up	Regulates
NIPBL	Down	MDFI	Up	Regulates
NIPBL	Down	MDK	Up	Regulates
NIPBL	Down	MMP9	Up	Regulates
NIPBL	Down	MUC1	Down	Regulates
NIPBL	Down	MXD1	Down	Regulates
NIPBL	Down	NEK11	Down	Regulates
NIPBL	Down	NFAT5	Down	Regulates
NIPBL	Down	NKD1	Up	Regulates
NIPBL	Down	OSGIN1	Up	Regulates
NIPBL	Down	PHGDH	Up	Regulates
NIPBL	Down	PMEPA1	Down	Regulates
NIPBL	Down	PPP1R3F	Down	Regulates
NIPBL	Down	PRODH	Up	Regulates
NIPBL	Down	PRR19	Down	Regulates
NIPBL	Down	PTPRG	Down	Regulates
NIPBL	Down	QPRT	Down	Regulates
NIPBL	Down	RAB17	Down	Regulates
NIPBL	Down	RASGRF1	Up	Regulates
NIPBL	Down	RBM25	Down	Regulates
NIPBL	Down	REV3L	Down	Regulates
NIPBL	Down	SEMA3C	Down	Regulates
NIPBL	Down	SKIL	Down	Regulates
NIPBL	Down	SLC1A5	Up	Regulates
NIPBL	Down	SLC3A2	Up	Regulates
NIPBL	Down	SLC7A5	Up	Regulates
NIPBL	Down	SMAD6	Down	Regulates
NIPBL	Down	SNX29	Down	Regulates
NIPBL	Down	SPTBN4	Up	Regulates
NIPBL	Down	SSPN	Down	Regulates
NIPBL	Down	TNS4	Up	Regulates
NIPBL	Down	TRIM2	Down	Regulates
NIPBL	Down	UPP1	Up	Regulates
NIPBL	Down	USP34	Down	Regulates
NIPBL	Down	UTRN	Down	Regulates
NIPBL	Down	VPS13B	Down	Regulates
NIPBL	Down	VWA5A	Up	Regulates
NIPBL	Down	YARS1	Up	Regulates
NIPBL	Down	ZBTB20	Down	Regulates
NIPBL	Down	ZHX1-C8orf76	Down	Regulates
NPAT	Down	H1-2	Down	Regulates
NPAT	Down	H2AC6	Down	Regulates
NPAT	Down	H2AC8	Down	Regulates
NPAT	Down	H2AC11	Down	Regulates
NPAT	Down	H2AC13	Down	Regulates
NPAT	Down	H2BC4	Down	Regulates
NPAT	Down	H2BC5	Down	Regulates
NPAT	Down	H2BC8	Down	Regulates
NPAT	Down	H2BC9	Up	Regulates
NPAT	Down	H2BC11	Down	Regulates
NPAT	Down	H2BC12	Down	Regulates
NPAT	Down	H2BC15	Down	Regulates
NPAT	Down	H3C6	Down	Regulates
NPAT	Down	H3C8	Down	Regulates
NPAT	Down	H3C10	Down	Regulates
NPAT	Down	H4C8	Down	Regulates
NR3C2	Up	ATF4	Up	Regulates
NR3C2	Up	DDIT3	Up	Regulates
NR3C2	Up	DNAJB14	Down	Regulates
NR3C2	Up	H1-2	Down	Regulates
NR3C2	Up	H2AC6	Down	Regulates
NR3C2	Up	H2AC8	Down	Regulates
NR3C2	Up	H2AC11	Down	Regulates
NR3C2	Up	H2AC13	Down	Regulates
NR3C2	Up	H2BC4	Down	Regulates
NR3C2	Up	H2BC5	Down	Regulates
NR3C2	Up	H2BC8	Down	Regulates
NR3C2	Up	H2BC11	Down	Regulates
NR3C2	Up	H2BC12	Down	Regulates
NR3C2	Up	H3C6	Down	Regulates
NR3C2	Up	H3C10	Down	Regulates
NR3C2	Up	H4C8	Down	Regulates
NR3C2	Up	H2BC21	Down	Regulates
NR3C2	Up	ID2	Up	Regulates
NR3C2	Up	PCK2	Up	Regulates
NR3C2	Up	RHOB	Down	Regulates
NR3C2	Up	SLC1A5	Up	Regulates
NR3C2	Up	SLC3A2	Up	Regulates
NR3C2	Up	SLC7A5	Up	Regulates
REL	Down	ACBD7	Up	Regulates
REL	Down	ACHE	Up	Regulates
REL	Down	ADAM8	Up	Regulates
REL	Down	ADAMTS7	Down	Regulates
REL	Down	ADAMTSL4	Up	Regulates
REL	Down	ADAT3	Down	Regulates
REL	Down	ADM2	Up	Regulates
REL	Down	AGL	Down	Regulates
REL	Down	AHI1	Down	Regulates
REL	Down	AKR1B1	Down	Regulates
REL	Down	ALDH3B1	Up	Regulates
REL	Down	ALOX5AP	Up	Regulates
REL	Down	ALOXE3	Up	Regulates
REL	Down	ANK1	Down	Regulates
REL	Down	ARHGAP42	Down	Regulates
REL	Down	ARID4B	Down	Regulates
REL	Down	ARL15	Down	Regulates
REL	Down	ARL4C	Down	Regulates
REL	Down	ARSG	Up	Regulates
REL	Down	ASH1L	Down	Regulates
REL	Down	ASNS	Up	Regulates
REL	Down	ATF3	Up	Regulates
REL	Down	ATF4	Up	Regulates
REL	Down	ATRX	Down	Regulates
REL	Down	AVPR2	Up	Regulates
REL	Down	BAZ1A	Down	Regulates
REL	Down	BAZ2B	Down	Regulates
REL	Down	BMPR2	Down	Regulates
REL	Down	BTBD19	Down	Regulates
REL	Down	C15orf62	Down	Regulates
REL	Down	C1orf21	Up	Regulates
REL	Down	CARS1	Up	Regulates
REL	Down	CCDC92	Down	Regulates
REL	Down	CD274	Up	Regulates
REL	Down	CD2AP	Down	Regulates
REL	Down	CD68	Up	Regulates
REL	Down	CDC42EP5	Up	Regulates
REL	Down	CDH16	Down	Regulates
REL	Down	CDK18	Up	Regulates
REL	Down	CDKN1C	Up	Regulates
REL	Down	CEP162	Down	Regulates
REL	Down	CEP350	Down	Regulates
REL	Down	CHAC1	Up	Regulates
REL	Down	CHIC1	Down	Regulates
REL	Down	CITED4	Down	Regulates
REL	Down	CKLF	Down	Regulates
REL	Down	COL13A1	Up	Regulates
REL	Down	CORO1A	Up	Regulates
REL	Down	CPED1	Up	Regulates
REL	Down	CREBRF	Down	Regulates
REL	Down	CYB5R2	Up	Regulates
REL	Down	DDIT3	Up	Regulates
REL	Down	DDN	Up	Regulates
REL	Down	DGKH	Down	Regulates
REL	Down	DMC1	Up	Regulates
REL	Down	DNAJB14	Down	Regulates
REL	Down	DOCK2	Down	Regulates
REL	Down	DOK3	Down	Regulates
REL	Down	DST	Down	Regulates
REL	Down	EFNA1	Down	Regulates
REL	Down	EIF4EBP1	Up	Regulates
REL	Down	ENDOD1	Up	Regulates
REL	Down	ERCC6L2	Down	Regulates
REL	Down	ESCO1	Down	Regulates
REL	Down	ETNK1	Down	Regulates
REL	Down	EXPH5	Down	Regulates
REL	Down	F3	Up	Regulates
REL	Down	FAM107B	Up	Regulates
REL	Down	FAM135A	Down	Regulates
REL	Down	FAM167A	Up	Regulates
REL	Down	FAM214A	Down	Regulates
REL	Down	FAR2	Down	Regulates
REL	Down	FAXDC2	Down	Regulates
REL	Down	FER	Down	Regulates
REL	Down	FMNL1	Up	Regulates
REL	Down	FNDC5	Up	Regulates
REL	Down	FOSL1	Up	Regulates
REL	Down	FRMD4A	Down	Regulates
REL	Down	FXYD2	Down	Regulates
REL	Down	GAB1	Down	Regulates
REL	Down	GJB7	Down	Regulates
REL	Down	GPCPD1	Up	Regulates
REL	Down	GPR137C	Down	Regulates
REL	Down	GPSM3	Up	Regulates
REL	Down	GSDMA	Up	Regulates
REL	Down	HBEGF	Up	Regulates
REL	Down	HES2	Up	Regulates
REL	Down	HEY1	Up	Regulates
REL	Down	H1-2	Down	Regulates
REL	Down	H2AC6	Down	Regulates
REL	Down	H2AC8	Down	Regulates
REL	Down	H2AC11	Down	Regulates
REL	Down	H2AC13	Down	Regulates
REL	Down	H2BC4	Down	Regulates
REL	Down	H2BC5	Down	Regulates
REL	Down	H2BC8	Down	Regulates
REL	Down	H2BC9	Up	Regulates
REL	Down	H2BC11	Down	Regulates
REL	Down	H2BC12	Down	Regulates
REL	Down	H2BC15	Down	Regulates
REL	Down	H3C6	Down	Regulates
REL	Down	H3C8	Down	Regulates
REL	Down	H3C10	Down	Regulates
REL	Down	H4C8	Down	Regulates
REL	Down	H2BC21	Down	Regulates
REL	Down	HMGN5	Down	Regulates
REL	Down	HSD17B6	Up	Regulates
REL	Down	HSH2D	Up	Regulates
REL	Down	ICAM4	Down	Regulates
REL	Down	ID2	Up	Regulates
REL	Down	IGIP	Down	Regulates
REL	Down	IL1B	Up	Regulates
REL	Down	IL6ST	Down	Regulates
REL	Down	INHBE	Up	Regulates
REL	Down	INO80D	Down	Regulates
REL	Down	IQCD	Down	Regulates
REL	Down	IRAK3	Down	Regulates
REL	Down	JAK3	Up	Regulates
REL	Down	JAM2	Down	Regulates
REL	Down	JDP2	Up	Regulates
REL	Down	JMJD1C	Down	Regulates
REL	Down	KANK3	Up	Regulates
REL	Down	KAT6B	Down	Regulates
REL	Down	KIAA1109	Down	Regulates
REL	Down	ELAPOR1	Down	Regulates
REL	Down	RESF1	Down	Regulates
REL	Down	KIAA2026	Down	Regulates
REL	Down	KIF21A	Down	Regulates
REL	Down	KIF21B	Up	Regulates
REL	Down	KLF2	Up	Regulates
REL	Down	KSR2	Down	Regulates
REL	Down	LCP1	Up	Regulates
REL	Down	LIPC	Down	Regulates
REL	Down	LIPH	Down	Regulates
REL	Down	LMO4	Up	Regulates
REL	Down	LRG1	Up	Regulates
REL	Down	LRP3	Up	Regulates
REL	Down	LTB	Down	Regulates
REL	Down	LYL1	Up	Regulates
REL	Down	LYPD3	Up	Regulates
REL	Down	MAP1A	Up	Regulates
REL	Down	MAP3K1	Down	Regulates
REL	Down	MAP3K7CL	Up	Regulates
REL	Down	MARS1	Up	Regulates
REL	Down	MDK	Up	Regulates
REL	Down	MKLN1	Down	Regulates
REL	Down	MMP9	Up	Regulates
REL	Down	MPZL3	Up	Regulates
REL	Down	MTHFD2	Up	Regulates
REL	Down	MUC1	Down	Regulates
REL	Down	MXD1	Down	Regulates
REL	Down	MYCL	Up	Regulates
REL	Down	MYO7A	Down	Regulates
REL	Down	N4BP2	Down	Regulates
REL	Down	NAT16	Up	Regulates
REL	Down	NEK11	Down	Regulates
REL	Down	NEURL3	Down	Regulates
REL	Down	NFAT5	Down	Regulates
REL	Down	NIPAL2	Down	Regulates
REL	Down	NIPBL	Down	Regulates
REL	Down	NKD1	Up	Regulates
REL	Down	NLRP1	Up	Regulates
REL	Down	NOS3	Up	Regulates
REL	Down	NPAT	Down	Regulates
REL	Down	NR3C2	Up	Regulates
REL	Down	NREP	Down	Regulates
REL	Down	NT5M	Up	Regulates
REL	Down	NTNG2	Up	Regulates
REL	Down	OGDHL	Up	Regulates
REL	Down	OSGIN1	Up	Regulates
REL	Down	PBLD	Down	Regulates
REL	Down	PCK2	Up	Regulates
REL	Down	PDCD1LG2	Up	Regulates
REL	Down	PDE2A	Up	Regulates
REL	Down	PDE6B	Down	Regulates
REL	Down	PGAP1	Down	Regulates
REL	Down	PGF	Up	Regulates
REL	Down	PGM2L1	Down	Regulates
REL	Down	PIBF1	Down	Regulates
REL	Down	PIK3IP1	Down	Regulates
REL	Down	PLAUR	Up	Regulates
REL	Down	PMEPA1	Down	Regulates
REL	Down	PPP1R3F	Down	Regulates
REL	Down	PRODH	Up	Regulates
REL	Down	PRR19	Down	Regulates
REL	Down	PSAT1	Up	Regulates
REL	Down	PSD4	Down	Regulates
REL	Down	PTAFR	Up	Regulates
REL	Down	PTH1R	Up	Regulates
REL	Down	PTPN13	Down	Regulates
REL	Down	QPRT	Down	Regulates
REL	Down	RAB17	Down	Regulates
REL	Down	RAB3IL1	Up	Regulates
REL	Down	RASGRF1	Up	Regulates
REL	Down	RASGRP1	Down	Regulates
REL	Down	RBM25	Down	Regulates
REL	Down	RC3H1	Down	Regulates
REL	Down	REV3L	Down	Regulates
REL	Down	RGS2	Up	Regulates
REL	Down	RHOB	Down	Regulates
REL	Down	RSF1	Down	Regulates
REL	Down	S100A3	Down	Regulates
REL	Down	S100A4	Down	Regulates
REL	Down	SAMD9	Down	Regulates
REL	Down	SAMSN1	Up	Regulates
REL	Down	SAT1	Down	Regulates
REL	Down	SCAF11	Down	Regulates
REL	Down	SCN1B	Up	Regulates
REL	Down	SCN4B	Up	Regulates
REL	Down	SDSL	Up	Regulates
REL	Down	SEMA7A	Up	Regulates
REL	Down	SERPINE1	Up	Regulates
REL	Down	SETX	Down	Regulates
REL	Down	SH2D2A	Up	Regulates
REL	Down	SKIL	Down	Regulates
REL	Down	SLC16A6	Up	Regulates
REL	Down	SLC16A9	Up	Regulates
REL	Down	SLC1A4	Up	Regulates
REL	Down	SLC1A5	Up	Regulates
REL	Down	SLC37A1	Up	Regulates
REL	Down	SLC37A2	Up	Regulates
REL	Down	SLC3A2	Up	Regulates
REL	Down	SLC44A2	Up	Regulates
REL	Down	SLC5A3	Down	Regulates
REL	Down	SLC6A16	Down	Regulates
REL	Down	SLC7A11	Up	Regulates
REL	Down	SLC7A5	Up	Regulates
REL	Down	SLC7A6	Down	Regulates
REL	Down	SMAD6	Down	Regulates
REL	Down	SNCG	Up	Regulates
REL	Down	SNX29	Down	Regulates
REL	Down	SPOCD1	Up	Regulates
REL	Down	SPTBN4	Up	Regulates
REL	Down	SREK1	Down	Regulates
REL	Down	STARD4	Down	Regulates
REL	Down	STARD6	Up	Regulates
REL	Down	STEAP1	Up	Regulates
REL	Down	SYNE2	Down	Regulates
REL	Down	SYNE3	Up	Regulates
REL	Down	SYNGR4	Up	Regulates
REL	Down	SYT8	Down	Regulates
REL	Down	TAOK1	Down	Regulates
REL	Down	TET2	Down	Regulates
REL	Down	TMEM80	Down	Regulates
REL	Down	TMIE	Up	Regulates
REL	Down	TMTC3	Down	Regulates
REL	Down	TNFAIP6	Down	Regulates
REL	Down	TNFRSF17	Down	Regulates
REL	Down	TP53I11	Up	Regulates
REL	Down	TRIB2	Down	Regulates
REL	Down	TRIM2	Down	Regulates
REL	Down	TTC3	Down	Regulates
REL	Down	TUBE1	Up	Regulates
REL	Down	UHRF1BP1L	Down	Regulates
REL	Down	UPP1	Up	Regulates
REL	Down	USP34	Down	Regulates
REL	Down	UTRN	Down	Regulates
REL	Down	VPS13A	Down	Regulates
REL	Down	VPS13B	Down	Regulates
REL	Down	VPS13C	Down	Regulates
REL	Down	YARS1	Up	Regulates
REL	Down	ZBED6	Down	Regulates
REL	Down	ZBTB20	Down	Regulates
REL	Down	ZHX1-C8orf76	Down	Regulates
REL	Down	ZNF185	Up	Regulates
REL	Down	ZNF385C	Up	Regulates
REL	Down	ZNF407	Down	Regulates
REL	Down	ZNF433	Up	Regulates
REL	Down	ZNF652	Down	Regulates
REL	Down	ZNF69	Down	Regulates
REL	Down	ZNF708	Down	Regulates
REL	Down	ZNF713	Down	Regulates
REL	Down	ZNF844	Up	Regulates
REL	Down	ZNF888	Down	Regulates
TET2	Down	ACHE	Up	Regulates
TET2	Down	ADAMTS5	Down	Regulates
TET2	Down	ADAMTS7	Down	Regulates
TET2	Down	ADAMTSL4	Up	Regulates
TET2	Down	ADAT3	Down	Regulates
TET2	Down	ADM2	Up	Regulates
TET2	Down	AKR1B1	Down	Regulates
TET2	Down	ALDH3B1	Up	Regulates
TET2	Down	ALPK3	Down	Regulates
TET2	Down	ANKRD2	Down	Regulates
TET2	Down	ARID4B	Down	Regulates
TET2	Down	ARSG	Up	Regulates
TET2	Down	ATF4	Up	Regulates
TET2	Down	B3GNT3	Up	Regulates
TET2	Down	BMPR1B	Down	Regulates
TET2	Down	BTBD19	Down	Regulates
TET2	Down	BTC	Down	Regulates
TET2	Down	C15orf62	Down	Regulates
TET2	Down	C16orf74	Up	Regulates
TET2	Down	C6orf132	Up	Regulates
TET2	Down	C6orf141	Up	Regulates
TET2	Down	CARS1	Up	Regulates
TET2	Down	CCDC74B	Up	Regulates
TET2	Down	CCDC92	Down	Regulates
TET2	Down	CD68	Up	Regulates
TET2	Down	CDC42EP5	Up	Regulates
TET2	Down	CDK18	Up	Regulates
TET2	Down	CFAP44	Down	Regulates
TET2	Down	CHAC1	Up	Regulates
TET2	Down	CKLF	Down	Regulates
TET2	Down	CMTM1	Down	Regulates
TET2	Down	COL13A1	Up	Regulates
TET2	Down	COL17A1	Up	Regulates
TET2	Down	COL7A1	Down	Regulates
TET2	Down	CORO2B	Up	Regulates
TET2	Down	CPED1	Up	Regulates
TET2	Down	CXCL6	Down	Regulates
TET2	Down	CYB5R2	Up	Regulates
TET2	Down	CYP27C1	Down	Regulates
TET2	Down	CYYR1	Down	Regulates
TET2	Down	DACT3	Up	Regulates
TET2	Down	DDIT3	Up	Regulates
TET2	Down	DDN	Up	Regulates
TET2	Down	DKKL1	Up	Regulates
TET2	Down	DNHD1	Down	Regulates
TET2	Down	DOCK2	Down	Regulates
TET2	Down	DOK3	Down	Regulates
TET2	Down	ECM1	Up	Regulates
TET2	Down	EFNA1	Down	Regulates
TET2	Down	EIF4EBP1	Up	Regulates
TET2	Down	FA2H	Up	Regulates
TET2	Down	FAM107B	Up	Regulates
TET2	Down	FAM167A	Up	Regulates
TET2	Down	FAR2	Down	Regulates
TET2	Down	FER	Down	Regulates
TET2	Down	FIGN	Down	Regulates
TET2	Down	FMNL1	Up	Regulates
TET2	Down	FNDC5	Up	Regulates
TET2	Down	FOSL1	Up	Regulates
TET2	Down	FRMD4A	Down	Regulates
TET2	Down	FUT1	Up	Regulates
TET2	Down	FXYD2	Down	Regulates
TET2	Down	GPC4	Up	Regulates
TET2	Down	GREB1	Up	Regulates
TET2	Down	GSDMA	Up	Regulates
TET2	Down	MACROH2A2	Up	Regulates
TET2	Down	HBEGF	Up	Regulates
TET2	Down	H3C6	Down	Regulates
TET2	Down	HSH2D	Up	Regulates
TET2	Down	HTR1D	Up	Regulates
TET2	Down	ICAM4	Down	Regulates
TET2	Down	IGIP	Down	Regulates
TET2	Down	INHBE	Up	Regulates
TET2	Down	IQCD	Down	Regulates
TET2	Down	IRAK3	Down	Regulates
TET2	Down	JDP2	Up	Regulates
TET2	Down	KANK3	Up	Regulates
TET2	Down	KBTBD11	Up	Regulates
TET2	Down	KCNMA1	Down	Regulates
TET2	Down	ELAPOR1	Down	Regulates
TET2	Down	KIF21B	Up	Regulates
TET2	Down	LCP1	Up	Regulates
TET2	Down	LGALS4	Up	Regulates
TET2	Down	LIPC	Down	Regulates
TET2	Down	LRG1	Up	Regulates
TET2	Down	LTB	Down	Regulates
TET2	Down	LYL1	Up	Regulates
TET2	Down	LYPD3	Up	Regulates
TET2	Down	LYPD6	Up	Regulates
TET2	Down	MAP1A	Up	Regulates
TET2	Down	MAP3K7CL	Up	Regulates
TET2	Down	MARS1	Up	Regulates
TET2	Down	MATN4	Up	Regulates
TET2	Down	MDFI	Up	Regulates
TET2	Down	MDK	Up	Regulates
TET2	Down	MGARP	Down	Regulates
TET2	Down	MTHFD2	Up	Regulates
TET2	Down	MUC1	Down	Regulates
TET2	Down	MYO7A	Down	Regulates
TET2	Down	NAT16	Up	Regulates
TET2	Down	NDUFA4L2	Up	Regulates
TET2	Down	NEURL3	Down	Regulates
TET2	Down	NKD1	Up	Regulates
TET2	Down	NLRP1	Up	Regulates
TET2	Down	NOS3	Up	Regulates
TET2	Down	NR3C2	Up	Regulates
TET2	Down	NT5M	Up	Regulates
TET2	Down	NUPR1	Up	Regulates
TET2	Down	OSGIN1	Up	Regulates
TET2	Down	PDCD1LG2	Up	Regulates
TET2	Down	PDE2A	Up	Regulates
TET2	Down	PGF	Up	Regulates
TET2	Down	PHGDH	Up	Regulates
TET2	Down	PIK3IP1	Down	Regulates
TET2	Down	PLA2G4B	Down	Regulates
TET2	Down	PLA2R1	Down	Regulates
TET2	Down	PLCB4	Down	Regulates
TET2	Down	PLXNB3	Up	Regulates
TET2	Down	PMEPA1	Down	Regulates
TET2	Down	PMFBP1	Down	Regulates
TET2	Down	PPP1R3F	Down	Regulates
TET2	Down	PPP1R9A	Down	Regulates
TET2	Down	PRR19	Down	Regulates
TET2	Down	PSD3	Down	Regulates
TET2	Down	PSD4	Down	Regulates
TET2	Down	PSTPIP2	Up	Regulates
TET2	Down	PTAFR	Up	Regulates
TET2	Down	PTGFRN	Up	Regulates
TET2	Down	PTPRG	Down	Regulates
TET2	Down	QPRT	Down	Regulates
TET2	Down	RAB11FIP4	Up	Regulates
TET2	Down	RAB17	Down	Regulates
TET2	Down	RAB3IL1	Up	Regulates
TET2	Down	RASGRP2	Up	Regulates
TET2	Down	RHOB	Down	Regulates
TET2	Down	ROBO4	Up	Regulates
TET2	Down	S100A3	Down	Regulates
TET2	Down	S100A4	Down	Regulates
TET2	Down	SCN1B	Up	Regulates
TET2	Down	SEMA7A	Up	Regulates
TET2	Down	SERPINE1	Up	Regulates
TET2	Down	SERPINE2	Up	Regulates
TET2	Down	SGK2	Down	Regulates
TET2	Down	SLC1A5	Up	Regulates
TET2	Down	SLC2A12	Down	Regulates
TET2	Down	SLC37A1	Up	Regulates
TET2	Down	SLC37A2	Up	Regulates
TET2	Down	SLC44A2	Up	Regulates
TET2	Down	SLC6A16	Down	Regulates
TET2	Down	SLC7A5	Up	Regulates
TET2	Down	SLC7A6	Down	Regulates
TET2	Down	SMAD6	Down	Regulates
TET2	Down	SNCG	Up	Regulates
TET2	Down	SNX29	Down	Regulates
TET2	Down	SP6	Up	Regulates
TET2	Down	SPOCD1	Up	Regulates
TET2	Down	SSPN	Down	Regulates
TET2	Down	SYNE2	Down	Regulates
TET2	Down	SYNE3	Up	Regulates
TET2	Down	SYNGR4	Up	Regulates
TET2	Down	SYT8	Down	Regulates
TET2	Down	TCEA3	Up	Regulates
TET2	Down	TGM4	Down	Regulates
TET2	Down	TMEM80	Down	Regulates
TET2	Down	TMEM92	Up	Regulates
TET2	Down	TMIE	Up	Regulates
TET2	Down	TNS4	Up	Regulates
TET2	Down	TP53I11	Up	Regulates
TET2	Down	TPPP	Up	Regulates
TET2	Down	TRIB2	Down	Regulates
TET2	Down	TRIM2	Down	Regulates
TET2	Down	TTC3	Down	Regulates
TET2	Down	TTYH2	Up	Regulates
TET2	Down	TUBE1	Up	Regulates
TET2	Down	UCN2	Down	Regulates
TET2	Down	UPP1	Up	Regulates
TET2	Down	UTRN	Down	Regulates
TET2	Down	VPS13B	Down	Regulates
TET2	Down	VWA5A	Up	Regulates
TET2	Down	YARS1	Up	Regulates
TET2	Down	ZBED2	Down	Regulates
TET2	Down	ZNF385C	Up	Regulates
TET2	Down	ZNF433	Up	Regulates
TET2	Down	ZNF888	Down	Regulates
ZNF708	Down	CYB5R2	Up	Regulates
