# Supplementary material for: Peptide-based Self-adaptive Implant Coating Sequentially Regulates Bone Regeneration to Enhance Interfacial Osseointegration
Source: Research Square preprint supplement (doi:10.21203/rs.3.rs-5132912/v1), 2024-10-01
Supplement: Supplementary file 1065 [file Figure 1+Figure S3.xlsx]

## Sheet: HPLC+MS
(DOPA)4-PEG5-DBCO						(2-Azido)-Y5-PVGLIG-K23						(2-Azido)-K15-PVGLIG-K23
HPLC			MS			HPLC			MS			HPLC			MS
0	0		305.62	10130		0	0		300.27	14420		0	0		301.1	39150
0.000833	0		317.8	2371		0.000833	0		302.37	131100		0.000833	0		305.31	3490
0.001667	0		332.39	4336		0.001667	0		318.18	80450		0.001667	0		314.16	5249
0.0025	0		347.37	7735		0.0025	0		341.25	52470		0.0025	0		314.8	28000
0.003333	0		361.46	37650		0.003333	0		343.29	26070		0.003333	0		331.18	6750
0.004167	0		372.49	5861		0.004167	0		346.29	55420		0.004167	0		333.8	22410
0.005	0		403.47	10730		0.005	0		348.39	4305		0.005	0		341.57	8095
0.005833	0		412.08	13770		0.005833	0		358.21	26490		0.005833	0		345.4	2451
0.006667	0		430.95	4262		0.006667	0		364.33	21790		0.006667	0		365.8	22870
0.0075	0		441.85	7010		0.0075	0		386.26	13100		0.0075	0		369.3	21140
0.008333	0		458.24	50140		0.008333	0		387.79	4406		0.008333	0		372.62	3967
0.009167	0		459.83	40230		0.009167	0		394.1	22360		0.009167	0		378.35	3047
0.01	0		461.04	6459		0.01	0		397.42	25880		0.01	0		385.37	24800
0.010833	0		471.18	8751		0.010833	0		409.85	17290		0.010833	0		408.95	8485
0.011667	0		511.16	4820		0.011667	0		412.14	11700		0.011667	0		410.29	7915
0.0125	0		525.82	10750		0.0125	0		415.84	5350		0.0125	0		410.99	16450
0.013333	0		527.99	37080		0.013333	0		428.21	11790		0.013333	0		412.65	45800
0.014167	0		533.54	555000		0.014167	0		429.87	28180		0.014167	0		413.35	30550
0.015	0		536.22	38230		0.015	0		437.26	43220		0.015	0		416.16	16220
0.015833	0		552.54	397900		0.015833	0		441.34	3921		0.015833	0		426.42	95190
0.016667	0		557.96	4342		0.016667	0		451.22	147200		0.016667	0		427.51	29690
0.0175	0		563.83	16380		0.0175	0		460.21	6784		0.0175	0		428.14	42520
0.018333	0		571.1	38600		0.018333	0		463.08	23720		0.018333	0		429.48	17180
0.019167	0		572.05	2791		0.019167	0		471.88	282800		0.019167	0		431.14	14610
0.02	0		576.07	7642		0.02	0		480.11	49100		0.02	0		437.13	26650
0.020833	0		583.78	15320		0.020833	0		500.25	75350		0.020833	0		439.24	13070
0.021667	0		603.49	12520		0.021667	0		505.29	45010		0.021667	0		443.38	23430
0.0225	0		607.63	4974		0.0225	0		507.4	16680		0.0225	0		461.93	9174
0.023333	0		634.42	20230		0.023333	0		512.56	43890		0.023333	0		462.57	4822
0.024167	0		648.19	7594		0.024167	0		515.94	354000		0.024167	0		465.25	20630
0.025	0		673.12	249200		0.025	0		519.64	20330		0.025	0		478.89	7298
0.025833	0		673.31	216700		0.025833	0		531.56	27150		0.025833	0		482.08	19480
0.026667	0		678.1	6869		0.026667	0		535.58	30080		0.026667	0		483.8	22920
0.0275	0		688.81	253200		0.0275	0		542.4	156800		0.0275	0		484.44	14380
0.028333	0		689.51	507700		0.028333	0		542.78	159300		0.028333	0		488.65	7111
0.029167	0		692.06	21550		0.029167	0		552.67	37840		0.029167	0		510.01	40080
0.03	0		696.78	113600		0.03	0		557.96	57290		0.03	0		515.3	12560
0.030833	0		702.14	614600		0.030833	0		564.59	78790		0.030833	0		518.43	26040
0.031667	0		704.69	6969		0.031667	0		565.48	55910		0.031667	0		520.21	7694
0.0325	0		721.07	31940		0.0325	0		570.14	43360		0.0325	0		522.76	6408
0.033333	0		760.23	8373		0.033333	0		571.67	129100		0.033333	0		526.08	12280
0.034167	0		765.58	2863		0.034167	0		580.53	113900		0.034167	0		528.76	6269
0.035	0		792.68	6930		0.035	0		583.27	67410		0.035	0		541.57	8022
0.035833	0		799.82	23340000		0.035833	0		589.27	345300		0.035833	0		557.51	7698
0.036667	0		806.14	30670		0.036667	0		595.9	355700		0.036667	0		559.49	5795
0.0375	0		807.67	96060		0.0375	0		599.02	10750000		0.0375	0		560.19	10220
0.038333	0		810.79	1844000		0.038333	0		601.51	643700		0.038333	0		565.74	12680
0.039167	0		818.64	504700		0.039167	0		605.47	1099000		0.039167	0		566.7	11270
0.04	0		827.94	769000		0.04	0		608.27	374300		0.04	0		573.14	45670
0.040833	0		833.36	17920		0.040833	0		614.07	107000		0.040833	0		577.15	18180
0.041667	0		834.58	6706		0.041667	0		628.36	1267000		0.041667	0		584.1	55850
0.0425	0		849.43	9077		0.0425	0		650.74	641800		0.0425	0		591.31	36830
0.043333	0		850.45	67930		0.043333	0		656.54	50650		0.043333	0		625.23	154600
0.044167	0		852.88	10720		0.044167	0		663.11	99350		0.044167	0		626	138600
0.045	0		857.02	13850		0.045	0		664.64	49520		0.045	0		631.74	100500
0.045833	0		872.64	3614		0.045833	0		677.59	122000		0.045833	0		633.59	76920
0.046667	0		885.97	657300		0.046667	0		691.3	508700		0.046667	0		643.66	123700
0.0475	0		936.02	3684		0.0475	0		691.74	680800		0.0475	0		648.51	75420
0.048333	0		953.36	15130		0.048333	0		699.27	118300		0.048333	0		659.22	53830
0.049167	0		959.61	5971		0.049167	0		700.86	1345000		0.049167	0		661.13	53450
0.05	0		963.62	164400		0.05	0		701.82	768100		0.05	0		670.19	328800
0.050833	0		965.92	27630		0.050833	0		707.3	1574000		0.050833	0		674.91	131200
0.051667	0		973	15630		0.051667	0		718.65	48440000		0.051667	0		678.92	156000
0.0525	0		987.4	10020		0.0525	0		721.65	1700000		0.0525	0		686.26	109100
0.053333	0		1004.87	5219		0.053333	0		726.3	2616000		0.053333	0		693.34	390700
0.054167	0		1026.36	3870		0.054167	0		730.07	1450000		0.054167	0		695.7	109100
0.055	0		1057.47	4995		0.055	0		732.74	849100		0.055	0		700.8	293800
0.055833	0		1115.98	12710		0.055833	0		735.68	261100		0.055833	0		704.37	76360
0.056667	0		1134.79	15270		0.056667	0		742.44	119100		0.056667	0		712.59	608300
0.0575	0		1166.02	12060		0.0575	0		746.01	284000		0.0575	0		715.21	24020000
0.058333	0		1183.23	6923		0.058333	0		748.3	172700		0.058333	0		728.66	540900
0.059167	0		1192.54	3162		0.059167	0		760.23	170000		0.059167	0		744.48	109100
0.06	0		1254.48	6319		0.06	0		765.65	72470		0.06	0		755.51	120800
0.060833	0		1269.4	1146		0.060833	0		767.37	67390		0.060833	0		758.12	159900
0.061667	0		1307.63	16090		0.061667	0		771.39	64650		0.061667	0		763.93	143600
0.0625	0		1315.15	1736		0.0625	0		778.97	106700		0.0625	0		765.97	80110
0.063333	0		1401.44	1254		0.063333	0		779.8	50550		0.063333	0		769.09	126200
0.064167	0		1403.86	79920		0.064167	0		791.92	73020		0.064167	0		770.62	112800
0.065	0		1418.58	3018		0.065	0		799.31	96540		0.065	0		775.4	106300
0.065833	0		1419.21	2195		0.065833	0		806.33	43400		0.065833	0		794.09	710900
0.066667	0		1463.12	2366		0.066667	0		809.39	27440		0.066667	0		808.62	165400
0.0675	0		1500.2	3714		0.0675	0		812.96	398000		0.0675	0		810.54	75500
0.068333	0		1521.74	6744		0.068333	0		820.93	43940		0.068333	0		812.39	116700
0.069167	0		1538.37	4473		0.069167	0		832.34	45360		0.069167	0		813.34	125800
0.07	0		1540.85	20080		0.07	0		845.1	72770		0.07	0		831.32	198400
0.070833	0		1543.97	4445		0.070833	0		852.94	16760		0.070833	0		832.22	261800
0.071667	0		1580.36	2680		0.071667	0		864.23	330500		0.071667	0		834.32	33340000
0.0725	0		1597.94	1795000		0.0725	0		874.68	44920		0.0725	0		840.7	2369000
0.073333	0		1598.96	1691000		0.073333	0		881.57	95490		0.073333	0		844.14	778900
0.074167	0		1599.92	878900		0.074167	0		883.48	1109000		0.074167	0		861.23	367100
0.075	0		1600.94	281100		0.075	0		898.15	26620000		0.075	0		883.8	384600
0.075833	0		1601.96	65530		0.075833	0		901.84	776800		0.075833	0		901.72	500000
0.076667	0		1619.8	80400		0.076667	0		912.3	907600		0.076667	0		906.05	69950
0.0775	0		1621.01	92220		0.0775	0		915.93	312700		0.0775	0		907.26	27860
0.078333	0		1655.8	12480		0.078333	0		918.29	86530		0.078333	0		909.24	31880
0.079167	0		1683	1098		0.079167	0		922.69	1752000		0.079167	0		928.37	100800
0.08	0		1686.51	8477		0.08	0		925.24	28310		0.08	0		929.58	15310
0.080833	0		1692.05	3762		0.080833	0		928.3	41450		0.080833	0		932.77	108000
0.081667	0		1703.65	5523		0.081667	0		936.91	142800		0.081667	0		942.39	29300
0.0825	0		1751.38	2089		0.0825	0		954.38	52830		0.0825	0		943.92	48360
0.083333	0		1783.68	2196		0.083333	0		970.32	150100		0.083333	0		965.66	49360
0.084167	0		1820.07	1627		0.084167	0		979.56	73120		0.084167	0		966.17	13690
0.085	0		1834.41	1076		0.085	0		1010.04	12090		0.085	0		970.64	69830
0.085833	0		1835.68	8095		0.085833	0		1037.83	31700		0.085833	0		974.85	47710
0.086667	0		1858.37	1701		0.086667	0		1046.18	53220		0.086667	0		976.25	18680
0.0875	0		1888.9	1267		0.0875	0		1057.85	23830		0.0875	0		992.25	273700
0.088333	0		1907.7	1108		0.088333	0		1066.01	27600		0.088333	0		994.61	44870
0.089167	0		1967.11	1406		0.089167	0		1083.6	112000		0.089167	0		1000.98	27330000
0.09	0		1984.52	1013		0.09	0		1088.64	38020		0.09	0		1003.53	94970
0.090833	0		1988.4	1595		0.090833	0		1093.42	13330		0.090833	0		1042.74	83610
0.091667	0		1997.33	76070		0.091667	0		1104.89	35910		0.091667	0		1053.9	34000
0.0925	0					0.0925	0		1111.14	11780		0.0925	0		1072.7	297200
0.093333	0					0.093333	0		1116.81	25070		0.093333	0		1077.74	48720
0.094167	0					0.094167	0		1118.85	3397		0.094167	0		1094.76	7372
0.095	0					0.095	0		1148.24	61520		0.095	0		1108.46	189300
0.095833	0					0.095833	0		1159.2	24630		0.095833	0		1140.84	3933
0.096667	0					0.096667	0		1163.98	35810		0.096667	0		1144.86	14020
0.0975	0					0.0975	0		1166.4	20020		0.0975	0		1151.42	35460
0.098333	0					0.098333	0		1169.02	53200		0.098333	0		1157.35	16740
0.099167	0					0.099167	0		1174.37	29600		0.099167	0		1176.28	22850
0.1	0					0.1	0		1178.19	302900		0.1	0		1182.34	16560
0.100833	0					0.100833	0		1179.28	79170		0.100833	0		1190.81	40280
0.101667	0					0.101667	0		1182.59	34560		0.101667	0		1214.52	10620
0.1025	0					0.1025	0		1183.36	34560		0.1025	0		1220.71	10200
0.103333	0					0.103333	0		1184.06	34940		0.103333	0		1284.69	108400
0.104167	0					0.104167	0		1188.65	122300		0.104167	0		1286.86	4907
0.105	0					0.105	0		1190.88	15800		0.105	0		1427.63	3659
0.105833	0					0.105833	0		1197.19	13500000		0.105833	0		1502.75	16050
0.106667	0					0.106667	0		1197.63	13600000		0.106667	0		1506.76	15750
0.1075	0					0.1075	0		1202.03	372500		0.1075	0		1515.18	13640
0.108333	0					0.108333	0		1221.09	111600		0.108333	0		1648.47	28420
0.109167	0					0.109167	0		1224.91	65110		0.109167	0		1667.78	2169000
0.11	0					0.11	0		1232.5	54580		0.11	0		1695.68	21100
0.110833	0					0.110833	0		1238.3	29420		0.110833	0		1821.28	1743
0.111667	0					0.111667	0		1242.18	191700		0.111667	0		1896.23	23340
0.1125	0					0.1125	0		1264.24	13630		0.1125	0		1910.12	14320
0.113333	0					0.113333	0		1293.87	27740		0.113333	0		1916.75	10670
0.114167	0					0.114167	0		1338.73	25080		0.114167	0		1962.78	19040
0.115	0					0.115	0		1339.88	13640		0.115	0		1976.36	12890
0.115833	0					0.115833	0		1343.89	10770		0.115833	0		1990.83	31480
0.116667	0					0.116667	0		1355.62	19200		0.116667	0		1995.61	7923
0.1175	0					0.1175	0		1417.05	11870		0.1175	0
0.118333	0					0.118333	0		1424.44	36890		0.118333	0
0.119167	0					0.119167	0		1430.3	25610		0.119167	0
0.12	0					0.12	0		1430.68	25610		0.12	0
0.120833	0					0.120833	0		1435.85	21050		0.120833	0
0.121667	0					0.121667	0		1440.75	30340		0.121667	0
0.1225	0					0.1225	0		1445.53	20640		0.1225	0
0.123333	0					0.123333	0		1448.84	21770		0.123333	0
0.124167	0					0.124167	0		1450.88	18060		0.124167	0
0.125	0					0.125	0		1462.74	21210		0.125	0
0.125833	0					0.125833	0		1463.95	49020		0.125833	0
0.126667	0					0.126667	0		1469.94	51560		0.126667	0
0.1275	0					0.1275	0		1476.56	25140		0.1275	0
0.128333	0					0.128333	0		1491.15	31430		0.128333	0
0.129167	0					0.129167	0		1523.46	9110		0.129167	0
0.13	0					0.13	0		1534.35	21310		0.13	0
0.130833	0					0.130833	0		1568.51	24190		0.130833	0
0.131667	0					0.131667	0		1581.82	30080		0.131667	0
0.1325	0					0.1325	0		1584.56	1326		0.1325	0
0.133333	0					0.133333	0		1590.74	33810		0.133333	0
0.134167	0					0.134167	0		1596.35	7174		0.134167	0
0.135	0					0.135	0		1606.03	15800		0.135	0
0.135833	0					0.135833	0		1606.93	23040		0.135833	0
0.136667	0					0.136667	0		1609.28	13030		0.136667	0
0.1375	0					0.1375	0		1625.79	9866		0.1375	0
0.138333	0					0.138333	0		1631.71	2003		0.138333	0
0.139167	0					0.139167	0		1640.19	6421		0.139167	0
0.14	0					0.14	0		1645.6	8868		0.14	0
0.140833	0					0.140833	0		1648.85	1319		0.140833	0
0.141667	0					0.141667	0		1669.81	6730		0.141667	0
0.1425	0					0.1425	0		1675.61	15400		0.1425	0
0.143333	0					0.143333	0		1684.09	10910		0.143333	0
0.144167	0					0.144167	0		1708.81	10310		0.144167	0
0.145	0					0.145	0		1710.34	16360		0.145	0
0.145833	0					0.145833	0		1712.51	5212		0.145833	0
0.146667	0					0.146667	0		1733.66	3358		0.146667	0
0.1475	0					0.1475	0		1754.69	12950		0.1475	0
0.148333	0					0.148333	0		1762.4	7663		0.148333	0
0.149167	0					0.149167	0		1765.46	13560		0.149167	0
0.15	0					0.15	0		1769.47	8153		0.15	0
0.150833	0					0.150833	0		1790.37	5175		0.150833	0
0.151667	0					0.151667	0		1804.58	12670		0.151667	0
0.1525	0					0.1525	0		1811.02	25410		0.1525	0
0.153333	0					0.153333	0		1814.97	14290		0.153333	0
0.154167	0					0.154167	0		1820.07	62920		0.154167	0
0.155	0					0.155	0		1825.42	19780		0.155	0
0.155833	0					0.155833	0		1833.52	29480		0.155833	0
0.156667	0					0.156667	0		1835.87	6006		0.156667	0
0.1575	0					0.1575	0		1839.32	12290		0.1575	0
0.158333	0					0.158333	0		1840.78	9272		0.158333	0
0.159167	0					0.159167	0		1846.45	2385		0.159167	0
0.16	0					0.16	0		1848.56	10750		0.16	0
0.160833	0					0.160833	0		1862.64	21830		0.160833	0
0.161667	0					0.161667	0		1878.13	2457		0.161667	0
0.1625	0					0.1625	0		1886.16	3343		0.1625	0
0.163333	0					0.163333	0		1891.45	26000		0.163333	0
0.164167	0					0.164167	0		1900.24	5163		0.164167	0
0.165	0					0.165	0		1909.49	9515		0.165	0
0.165833	0					0.165833	0		1927.33	22930		0.165833	0
0.166667	0					0.166667	0		1992.93	6103		0.166667	0
0.1675	0					0.1675	0					0.1675	0
0.168333	0					0.168333	0					0.168333	0
0.169167	0					0.169167	0					0.169167	0
0.17	0					0.17	0					0.17	0
0.170833	0					0.170833	0					0.170833	0
0.171667	0					0.171667	0					0.171667	0
0.1725	0					0.1725	0					0.1725	0
0.173333	0					0.173333	0					0.173333	0
0.174167	0					0.174167	0					0.174167	0
0.175	0					0.175	0					0.175	0
0.175833	0					0.175833	0					0.175833	0
0.176667	0					0.176667	0					0.176667	0
0.1775	0					0.1775	0					0.1775	0
0.178333	0					0.178333	0					0.178333	0
0.179167	0					0.179167	0					0.179167	0
0.18	0					0.18	0					0.18	0
0.180833	0					0.180833	0					0.180833	0
0.181667	0					0.181667	0					0.181667	0
0.1825	0					0.1825	0					0.1825	0
0.183333	0					0.183333	0					0.183333	0
0.184167	0					0.184167	0					0.184167	0
0.185	0					0.185	0					0.185	0
0.185833	0					0.185833	0					0.185833	0
0.186667	0					0.186667	0					0.186667	0
0.1875	0					0.1875	0					0.1875	0
0.188333	0					0.188333	0					0.188333	0
0.189167	0					0.189167	0					0.189167	0
0.19	0					0.19	0					0.19	0
0.190833	0					0.190833	0					0.190833	0
0.191667	0					0.191667	0					0.191667	0
0.1925	0					0.1925	0					0.1925	0
0.193333	0					0.193333	0					0.193333	0
0.194167	0					0.194167	0					0.194167	0
0.195	0					0.195	0					0.195	0
0.195833	0					0.195833	0					0.195833	0
0.196667	0					0.196667	0					0.196667	0
0.1975	0					0.1975	0					0.1975	0
0.198333	0					0.198333	0					0.198333	0
0.199167	0					0.199167	0					0.199167	0
0.2	0					0.2	0					0.2	0
0.200833	0					0.200833	0					0.200833	0
0.201667	0					0.201667	0					0.201667	0
0.2025	0					0.2025	0					0.2025	0
0.203333	0					0.203333	0					0.203333	0
0.204167	0					0.204167	0					0.204167	0
0.205	0					0.205	0					0.205	0
0.205833	0					0.205833	0					0.205833	0
0.206667	0					0.206667	0					0.206667	0
0.2075	0					0.2075	0					0.2075	0
0.208333	0					0.208333	0					0.208333	0
0.209167	0					0.209167	0					0.209167	0
0.21	0					0.21	0					0.21	0
0.210833	0					0.210833	0					0.210833	0
0.211667	0					0.211667	0					0.211667	0
0.2125	0					0.2125	0					0.2125	0
0.213333	0					0.213333	0					0.213333	0
0.214167	0					0.214167	0					0.214167	0
0.215	0					0.215	0					0.215	0
0.215833	0					0.215833	0					0.215833	0
0.216667	0					0.216667	0					0.216667	0
0.2175	0					0.2175	0					0.2175	0
0.218333	0					0.218333	0					0.218333	0
0.219167	0					0.219167	0					0.219167	0
0.22	0					0.22	0					0.22	0
0.220833	0					0.220833	0					0.220833	0
0.221667	0					0.221667	0					0.221667	0
0.2225	0					0.2225	0					0.2225	0
0.223333	0					0.223333	0					0.223333	0
0.224167	0					0.224167	0					0.224167	0
0.225	0					0.225	0					0.225	0
0.225833	0					0.225833	0					0.225833	0
0.226667	0					0.226667	0					0.226667	0
0.2275	0					0.2275	0					0.2275	0
0.228333	0					0.228333	0					0.228333	0
0.229167	0					0.229167	0					0.229167	0
0.23	0					0.23	0					0.23	0
0.230833	0					0.230833	0					0.230833	0
0.231667	0					0.231667	0					0.231667	0
0.2325	0					0.2325	0					0.2325	0
0.233333	0					0.233333	0					0.233333	0
0.234167	0					0.234167	0					0.234167	0
0.235	0					0.235	0					0.235	0
0.235833	0					0.235833	0					0.235833	0
0.236667	0					0.236667	0					0.236667	0
0.2375	0					0.2375	0					0.2375	0
0.238333	0					0.238333	0					0.238333	0
0.239167	0					0.239167	0					0.239167	0
0.24	0					0.24	0					0.24	0
0.240833	0					0.240833	0					0.240833	0
0.241667	0					0.241667	0					0.241667	0
0.2425	0					0.2425	0					0.2425	0
0.243333	0					0.243333	0					0.243333	0
0.244167	0					0.244167	0					0.244167	0
0.245	0					0.245	0					0.245	0
0.245833	0					0.245833	0					0.245833	0
0.246667	0					0.246667	0					0.246667	0
0.2475	0					0.2475	0					0.2475	0
0.248333	0					0.248333	0					0.248333	0
0.249167	0					0.249167	0					0.249167	0
0.25	0					0.25	0					0.25	0
0.250833	0					0.250833	0					0.250833	0
0.251667	0					0.251667	0					0.251667	0
0.2525	0					0.2525	0					0.2525	0
0.253333	0					0.253333	0					0.253333	0
0.254167	0					0.254167	0					0.254167	0
0.255	0					0.255	0					0.255	0
0.255833	0					0.255833	0					0.255833	0
0.256667	0					0.256667	0					0.256667	0
0.2575	0					0.2575	0					0.2575	0
0.258333	0					0.258333	0					0.258333	0
0.259167	0					0.259167	0					0.259167	0
0.26	0					0.26	0					0.26	0
0.260833	0					0.260833	0					0.260833	0
0.261667	0					0.261667	0					0.261667	0
0.2625	0					0.2625	0					0.2625	0
0.263333	0					0.263333	0					0.263333	0
0.264167	0					0.264167	0					0.264167	0
0.265	0					0.265	0					0.265	0
0.265833	0					0.265833	0					0.265833	0
0.266667	0					0.266667	0					0.266667	0
0.2675	0					0.2675	0					0.2675	0
0.268333	0					0.268333	0					0.268333	0
0.269167	0					0.269167	0					0.269167	0
0.27	0					0.27	0					0.27	0
0.270833	0					0.270833	0					0.270833	0
0.271667	0					0.271667	0					0.271667	0
0.2725	0					0.2725	0					0.2725	0
0.273333	0					0.273333	0					0.273333	0
0.274167	0					0.274167	0					0.274167	0
0.275	0					0.275	0					0.275	0
0.275833	0					0.275833	0					0.275833	0
0.276667	0					0.276667	0					0.276667	0
0.2775	0					0.2775	0					0.2775	0
0.278333	0					0.278333	0					0.278333	0
0.279167	0					0.279167	0					0.279167	0
0.28	0					0.28	0					0.28	0
0.280833	0					0.280833	0					0.280833	0
0.281667	0					0.281667	0					0.281667	0
0.2825	0					0.2825	0					0.2825	0
0.283333	0					0.283333	0					0.283333	0
0.284167	0					0.284167	0					0.284167	0
0.285	0					0.285	0					0.285	0
0.285833	0					0.285833	0					0.285833	0
0.286667	0					0.286667	0					0.286667	0
0.2875	0					0.2875	0					0.2875	0
0.288333	0					0.288333	0					0.288333	0
0.289167	0					0.289167	0					0.289167	0
0.29	0					0.29	0					0.29	0
0.290833	0					0.290833	0					0.290833	0
0.291667	0					0.291667	0					0.291667	0
0.2925	0					0.2925	0					0.2925	0
0.293333	0					0.293333	0					0.293333	0
0.294167	0					0.294167	0					0.294167	0
0.295	0					0.295	0					0.295	0
0.295833	0					0.295833	0					0.295833	0
0.296667	0					0.296667	0					0.296667	0
0.2975	0					0.2975	0					0.2975	0
0.298333	0					0.298333	0					0.298333	0
0.299167	0					0.299167	0					0.299167	0
0.3	0					0.3	0					0.3	0
0.300833	0					0.300833	0					0.300833	0
0.301667	0					0.301667	0					0.301667	0
0.3025	0					0.3025	0					0.3025	0
0.303333	0					0.303333	0					0.303333	0
0.304167	0					0.304167	0					0.304167	0
0.305	0					0.305	0					0.305	0
0.305833	0					0.305833	0					0.305833	0
0.306667	0					0.306667	0					0.306667	0
0.3075	0					0.3075	0					0.3075	0
0.308333	0					0.308333	0					0.308333	0
0.309167	0					0.309167	0					0.309167	0
0.31	0					0.31	0					0.31	0
0.310833	0					0.310833	0					0.310833	0
0.311667	0					0.311667	0					0.311667	0
0.3125	0					0.3125	0					0.3125	0
0.313333	0					0.313333	0					0.313333	0
0.314167	0					0.314167	0					0.314167	0
0.315	0					0.315	0					0.315	0
0.315833	0					0.315833	0					0.315833	0
0.316667	0					0.316667	0					0.316667	0
0.3175	0					0.3175	0					0.3175	0
0.318333	0					0.318333	0					0.318333	0
0.319167	0					0.319167	0					0.319167	0
0.32	0					0.32	0					0.32	0
0.320833	0					0.320833	0					0.320833	0
0.321667	0					0.321667	0					0.321667	0
0.3225	0					0.3225	0					0.3225	0
0.323333	0					0.323333	0					0.323333	0
0.324167	0					0.324167	0					0.324167	0
0.325	0					0.325	0					0.325	0
0.325833	0					0.325833	0					0.325833	0
0.326667	0					0.326667	0					0.326667	0
0.3275	0					0.3275	0					0.3275	0
0.328333	0					0.328333	0					0.328333	0
0.329167	0					0.329167	0					0.329167	0
0.33	0					0.33	0					0.33	0
0.330833	0					0.330833	0					0.330833	0
0.331667	0					0.331667	0					0.331667	0
0.3325	0					0.3325	0					0.3325	0
0.333333	0					0.333333	0					0.333333	0
0.334167	0					0.334167	0					0.334167	0
0.335	0					0.335	0					0.335	0
0.335833	0					0.335833	0					0.335833	0
0.336667	0					0.336667	0					0.336667	0
0.3375	0					0.3375	0					0.3375	0
0.338333	0					0.338333	0					0.338333	0
0.339167	0					0.339167	0					0.339167	0
0.34	0					0.34	0					0.34	0
0.340833	0					0.340833	0					0.340833	0
0.341667	0					0.341667	0					0.341667	0
0.3425	0					0.3425	0					0.3425	0
0.343333	0					0.343333	0					0.343333	0
0.344167	0					0.344167	0					0.344167	0
0.345	0					0.345	0					0.345	0
0.345833	0					0.345833	0					0.345833	0
0.346667	0					0.346667	0					0.346667	0
0.3475	0					0.3475	0					0.3475	0
0.348333	0					0.348333	0					0.348333	0
0.349167	0					0.349167	0					0.349167	0
0.35	0					0.35	0					0.35	0
0.350833	0					0.350833	0					0.350833	0
0.351667	0					0.351667	0					0.351667	0
0.3525	0					0.3525	0					0.3525	0
0.353333	0					0.353333	0					0.353333	0
0.354167	0					0.354167	0					0.354167	0
0.355	0					0.355	0					0.355	0
0.355833	0					0.355833	0					0.355833	0
0.356667	0					0.356667	0					0.356667	0
0.3575	0					0.3575	0					0.3575	0
0.358333	0					0.358333	0					0.358333	0
0.359167	0					0.359167	0					0.359167	0
0.36	0					0.36	0					0.36	0
0.360833	0					0.360833	0					0.360833	0
0.361667	0					0.361667	0					0.361667	0
0.3625	0					0.3625	0					0.3625	0
0.363333	0					0.363333	0					0.363333	0
0.364167	0					0.364167	0					0.364167	0
0.365	0					0.365	0					0.365	0
0.365833	0					0.365833	0					0.365833	0
0.366667	0					0.366667	0					0.366667	0
0.3675	0					0.3675	0					0.3675	0
0.368333	0					0.368333	0					0.368333	0
0.369167	0					0.369167	0					0.369167	0
0.37	0					0.37	0					0.37	0
0.370833	0					0.370833	0					0.370833	0
0.371667	0					0.371667	0					0.371667	0
0.3725	0					0.3725	0					0.3725	0
0.373333	0					0.373333	0					0.373333	0
0.374167	0					0.374167	0					0.374167	0
0.375	0					0.375	0					0.375	0
0.375833	0					0.375833	0					0.375833	0
0.376667	0					0.376667	0					0.376667	0
0.3775	0					0.3775	0					0.3775	0
0.378333	0					0.378333	0					0.378333	0
0.379167	0					0.379167	0					0.379167	0
0.38	0					0.38	0					0.38	0
0.380833	0					0.380833	0					0.380833	0
0.381667	0					0.381667	0					0.381667	0
0.3825	0					0.3825	0					0.3825	0
0.383333	0					0.383333	0					0.383333	0
0.384167	0					0.384167	0					0.384167	0
0.385	0					0.385	0					0.385	0
0.385833	0					0.385833	0					0.385833	0
0.386667	0					0.386667	0					0.386667	0
0.3875	0					0.3875	0					0.3875	0
0.388333	0					0.388333	0					0.388333	0
0.389167	0					0.389167	0					0.389167	0
0.39	0					0.39	0					0.39	0
0.390833	0					0.390833	0					0.390833	0
0.391667	0					0.391667	0					0.391667	0
0.3925	0					0.3925	0					0.3925	0
0.393333	0					0.393333	0					0.393333	0
0.394167	0					0.394167	0					0.394167	0
0.395	0					0.395	0					0.395	0
0.395833	0					0.395833	0					0.395833	0
0.396667	0					0.396667	0					0.396667	0
0.3975	0					0.3975	0					0.3975	0
0.398333	0					0.398333	0					0.398333	0
0.399167	0					0.399167	0					0.399167	0
0.4	0					0.4	0					0.4	0
0.400833	0					0.400833	0					0.400833	0
0.401667	0					0.401667	0					0.401667	0
0.4025	0					0.4025	0					0.4025	0
0.403333	0					0.403333	0					0.403333	0
0.404167	0					0.404167	0					0.404167	0
0.405	0					0.405	0					0.405	0
0.405833	0					0.405833	0					0.405833	0
0.406667	0					0.406667	0					0.406667	0
0.4075	0					0.4075	0					0.4075	0
0.408333	0					0.408333	0					0.408333	0
0.409167	0					0.409167	0					0.409167	0
0.41	0					0.41	0					0.41	0
0.410833	0					0.410833	0					0.410833	0
0.411667	0					0.411667	0					0.411667	0
0.4125	0					0.4125	0					0.4125	0
0.413333	0					0.413333	0					0.413333	0
0.414167	0					0.414167	0					0.414167	0
0.415	0					0.415	0					0.415	0
0.415833	0					0.415833	0					0.415833	0
0.416667	0					0.416667	0					0.416667	0
0.4175	0					0.4175	0					0.4175	0
0.418333	0					0.418333	0					0.418333	0
0.419167	0					0.419167	0					0.419167	0
0.42	0					0.42	0					0.42	0
0.420833	0					0.420833	0					0.420833	0
0.421667	0					0.421667	0					0.421667	0
0.4225	0					0.4225	0					0.4225	0
0.423333	0					0.423333	0					0.423333	0
0.424167	0					0.424167	0					0.424167	0
0.425	0					0.425	0					0.425	0
0.425833	0					0.425833	0					0.425833	0
0.426667	0					0.426667	0					0.426667	0
0.4275	0					0.4275	0					0.4275	0
0.428333	0					0.428333	0					0.428333	0
0.429167	0					0.429167	0					0.429167	0
0.43	0					0.43	0					0.43	0
0.430833	0					0.430833	0					0.430833	0
0.431667	0					0.431667	0					0.431667	0
0.4325	0					0.4325	0					0.4325	0
0.433333	0					0.433333	0					0.433333	0
0.434167	0					0.434167	0					0.434167	0
0.435	0					0.435	0					0.435	0
0.435833	0					0.435833	0					0.435833	0
0.436667	0					0.436667	0					0.436667	0
0.4375	0					0.4375	0					0.4375	0
0.438333	0					0.438333	0					0.438333	0
0.439167	0					0.439167	0					0.439167	0
0.44	0					0.44	0					0.44	0
0.440833	0					0.440833	0					0.440833	0
0.441667	0					0.441667	0					0.441667	0
0.4425	0					0.4425	0					0.4425	0
0.443333	0					0.443333	0					0.443333	0
0.444167	0					0.444167	0					0.444167	0
0.445	0					0.445	0					0.445	0
0.445833	0					0.445833	0					0.445833	0
0.446667	0					0.446667	0					0.446667	0
0.4475	0					0.4475	0					0.4475	0
0.448333	0					0.448333	0					0.448333	0
0.449167	0					0.449167	0					0.449167	0
0.45	0					0.45	0					0.45	0
0.450833	0					0.450833	0					0.450833	0
0.451667	0					0.451667	0					0.451667	0
0.4525	0					0.4525	0					0.4525	0
0.453333	0					0.453333	0					0.453333	0
0.454167	0					0.454167	0					0.454167	0
0.455	0					0.455	0					0.455	0
0.455833	0					0.455833	0					0.455833	0
0.456667	0					0.456667	0					0.456667	0
0.4575	0					0.4575	0					0.4575	0
0.458333	0					0.458333	0					0.458333	0
0.459167	0					0.459167	0					0.459167	0
0.46	0					0.46	0					0.46	0
0.460833	0					0.460833	0					0.460833	0
0.461667	0					0.461667	0					0.461667	0
0.4625	0					0.4625	0					0.4625	0
0.463333	0					0.463333	0					0.463333	0
0.464167	0					0.464167	0					0.464167	0
0.465	0					0.465	0					0.465	0
0.465833	0					0.465833	0					0.465833	0
0.466667	0					0.466667	0					0.466667	0
0.4675	0					0.4675	0					0.4675	0
0.468333	0					0.468333	0					0.468333	0
0.469167	0					0.469167	0					0.469167	0
0.47	0					0.47	0					0.47	0
0.470833	0					0.470833	0					0.470833	0
0.471667	0					0.471667	0					0.471667	0
0.4725	0					0.4725	0					0.4725	0
0.473333	0					0.473333	0					0.473333	0
0.474167	0					0.474167	0					0.474167	0
0.475	0					0.475	0					0.475	0
0.475833	0					0.475833	0					0.475833	0
0.476667	0					0.476667	0					0.476667	0
0.4775	0					0.4775	0					0.4775	0
0.478333	0					0.478333	0					0.478333	0
0.479167	0					0.479167	0					0.479167	0
0.48	0					0.48	0					0.48	0
0.480833	0					0.480833	0					0.480833	0
0.481667	0					0.481667	0					0.481667	0
0.4825	0					0.4825	0					0.4825	0
0.483333	0					0.483333	0					0.483333	0
0.484167	0					0.484167	0					0.484167	0
0.485	0					0.485	0					0.485	0
0.485833	0					0.485833	0					0.485833	0
0.486667	0					0.486667	0					0.486667	0
0.4875	0					0.4875	0					0.4875	0
0.488333	0					0.488333	0					0.488333	0
0.489167	0					0.489167	0					0.489167	0
0.49	0					0.49	0					0.49	0
0.490833	0					0.490833	0					0.490833	0
0.491667	0					0.491667	0					0.491667	0
0.4925	0					0.4925	0					0.4925	0
0.493333	0					0.493333	0					0.493333	0
0.494167	0					0.494167	0					0.494167	0
0.495	0					0.495	0					0.495	0
0.495833	0					0.495833	0					0.495833	0
0.496667	0					0.496667	0					0.496667	0
0.4975	0					0.4975	0					0.4975	0
0.498333	0					0.498333	0					0.498333	0
0.499167	0					0.499167	0					0.499167	0
0.5	0					0.5	0					0.5	0
0.500833	0					0.500833	0					0.500833	0
0.501667	0					0.501667	0					0.501667	0
0.5025	0					0.5025	0					0.5025	0
0.503333	0					0.503333	0					0.503333	0
0.504167	0					0.504167	0					0.504167	0
0.505	0					0.505	0					0.505	0
0.505833	0					0.505833	0					0.505833	0
0.506667	0					0.506667	0					0.506667	0
0.5075	0					0.5075	0					0.5075	0
0.508333	0					0.508333	0					0.508333	0
0.509167	0					0.509167	0					0.509167	0
0.51	0					0.51	0					0.51	0
0.510833	0					0.510833	0					0.510833	0
0.511667	0					0.511667	0					0.511667	0
0.5125	0					0.5125	0					0.5125	0
0.513333	0					0.513333	0					0.513333	0
0.514167	0					0.514167	0					0.514167	0
0.515	0					0.515	0					0.515	0
0.515833	0					0.515833	0					0.515833	0
0.516667	0					0.516667	0					0.516667	0
0.5175	0					0.5175	0					0.5175	0
0.518333	0					0.518333	0					0.518333	0
0.519167	0					0.519167	0					0.519167	0
0.52	0					0.52	0					0.52	0
0.520833	0					0.520833	0					0.520833	0
0.521667	0					0.521667	0					0.521667	0
0.5225	0					0.5225	0					0.5225	0
0.523333	0					0.523333	0					0.523333	0
0.524167	0					0.524167	0					0.524167	0
0.525	0					0.525	0					0.525	0
0.525833	0					0.525833	0					0.525833	0
0.526667	0					0.526667	0					0.526667	0
0.5275	0					0.5275	0					0.5275	0
0.528333	0					0.528333	0					0.528333	0
0.529167	0					0.529167	0					0.529167	0
0.53	0					0.53	0					0.53	0
0.530833	0					0.530833	0					0.530833	0
0.531667	0					0.531667	0					0.531667	0
0.5325	0					0.5325	0					0.5325	0
0.533333	0					0.533333	0					0.533333	0
0.534167	0					0.534167	0					0.534167	0
0.535	0					0.535	0					0.535	0
0.535833	0					0.535833	0					0.535833	0
0.536667	0					0.536667	0					0.536667	0
0.5375	0					0.5375	0					0.5375	0
0.538333	0					0.538333	0					0.538333	0
0.539167	0					0.539167	0					0.539167	0
0.54	0					0.54	0					0.54	0
0.540833	0					0.540833	0					0.540833	0
0.541667	0					0.541667	0					0.541667	0
0.5425	0					0.5425	0					0.5425	0
0.543333	0					0.543333	0					0.543333	0
0.544167	0					0.544167	0					0.544167	0
0.545	0					0.545	0					0.545	0
0.545833	0					0.545833	0					0.545833	0
0.546667	0					0.546667	0					0.546667	0
0.5475	0					0.5475	0					0.5475	0
0.548333	0					0.548333	0					0.548333	0
0.549167	0					0.549167	0					0.549167	0
0.55	0					0.55	0					0.55	0
0.550833	0					0.550833	0					0.550833	0
0.551667	0					0.551667	0					0.551667	0
0.5525	0					0.5525	0					0.5525	0
0.553333	0					0.553333	0					0.553333	0
0.554167	0					0.554167	0					0.554167	0
0.555	0					0.555	0					0.555	0
0.555833	0					0.555833	0					0.555833	0
0.556667	0					0.556667	0					0.556667	0
0.5575	0					0.5575	0					0.5575	0
0.558333	0					0.558333	0					0.558333	0
0.559167	0					0.559167	0					0.559167	0
0.56	0					0.56	0					0.56	0
0.560833	0					0.560833	0					0.560833	0
0.561667	0					0.561667	0					0.561667	0
0.5625	0					0.5625	0					0.5625	0
0.563333	0					0.563333	0					0.563333	0
0.564167	0					0.564167	0					0.564167	0
0.565	0					0.565	0					0.565	0
0.565833	0					0.565833	0					0.565833	0
0.566667	0					0.566667	0					0.566667	0
0.5675	0					0.5675	0					0.5675	0
0.568333	0					0.568333	0					0.568333	0
0.569167	0					0.569167	0					0.569167	0
0.57	0					0.57	0					0.57	0
0.570833	0					0.570833	0					0.570833	0
0.571667	0					0.571667	0					0.571667	0
0.5725	0					0.5725	0					0.5725	0
0.573333	0					0.573333	0					0.573333	0
0.574167	0					0.574167	0					0.574167	0
0.575	0					0.575	0					0.575	0
0.575833	0					0.575833	0					0.575833	0
0.576667	0					0.576667	0					0.576667	0
0.5775	0					0.5775	0					0.5775	0
0.578333	0					0.578333	0					0.578333	0
0.579167	0					0.579167	0					0.579167	0
0.58	0					0.58	0					0.58	0
0.580833	0					0.580833	0					0.580833	0
0.581667	0					0.581667	0					0.581667	0
0.5825	0					0.5825	0					0.5825	0
0.583333	0					0.583333	0					0.583333	0
0.584167	0					0.584167	0					0.584167	0
0.585	0					0.585	0					0.585	0
0.585833	0					0.585833	0					0.585833	0
0.586667	0					0.586667	0					0.586667	0
0.5875	0					0.5875	0					0.5875	0
0.588333	0					0.588333	0					0.588333	0
0.589167	0					0.589167	0					0.589167	0
0.59	0					0.59	0					0.59	0
0.590833	0					0.590833	0					0.590833	0
0.591667	0					0.591667	0					0.591667	0
0.5925	0					0.5925	0					0.5925	0
0.593333	0					0.593333	0					0.593333	0
0.594167	0					0.594167	0					0.594167	0
0.595	0					0.595	0					0.595	0
0.595833	0					0.595833	0					0.595833	0
0.596667	0					0.596667	0					0.596667	0
0.5975	0					0.5975	0					0.5975	0
0.598333	0					0.598333	0					0.598333	0
0.599167	0					0.599167	0					0.599167	0
0.6	0					0.6	0					0.6	0
0.600833	0					0.600833	0					0.600833	0
0.601667	0					0.601667	0					0.601667	0
0.6025	0					0.6025	0					0.6025	0
0.603333	0					0.603333	0					0.603333	0
0.604167	0					0.604167	0					0.604167	0
0.605	0					0.605	0					0.605	0
0.605833	0					0.605833	0					0.605833	0
0.606667	0					0.606667	0					0.606667	0
0.6075	0					0.6075	0					0.6075	0
0.608333	0					0.608333	0					0.608333	0
0.609167	0					0.609167	0					0.609167	0
0.61	0					0.61	0					0.61	0
0.610833	0					0.610833	0					0.610833	0
0.611667	0					0.611667	0					0.611667	0
0.6125	0					0.6125	0					0.6125	0
0.613333	0					0.613333	0					0.613333	0
0.614167	0					0.614167	0					0.614167	0
0.615	0					0.615	0					0.615	0
0.615833	0					0.615833	0					0.615833	0
0.616667	0					0.616667	0					0.616667	0
0.6175	0					0.6175	0					0.6175	0
0.618333	0					0.618333	0					0.618333	0
0.619167	0					0.619167	0					0.619167	0
0.62	0					0.62	0					0.62	0
0.620833	0					0.620833	0					0.620833	0
0.621667	0					0.621667	0					0.621667	0
0.6225	0					0.6225	0					0.6225	0
0.623333	0					0.623333	0					0.623333	0
0.624167	0					0.624167	0					0.624167	0
0.625	0					0.625	0					0.625	0
0.625833	0					0.625833	0					0.625833	0
0.626667	0					0.626667	0					0.626667	0
0.6275	0					0.6275	0					0.6275	0
0.628333	0					0.628333	0					0.628333	0
0.629167	0					0.629167	0					0.629167	0
0.63	0					0.63	0					0.63	0
0.630833	0					0.630833	0					0.630833	0
0.631667	0					0.631667	0					0.631667	0
0.6325	0					0.6325	0					0.6325	0
0.633333	0					0.633333	0					0.633333	0
0.634167	0					0.634167	0					0.634167	0
0.635	0					0.635	0					0.635	0
0.635833	0					0.635833	0					0.635833	0
0.636667	0					0.636667	0					0.636667	0
0.6375	0					0.6375	0					0.6375	0
0.638333	0					0.638333	0					0.638333	0
0.639167	0					0.639167	0					0.639167	0
0.64	0					0.64	0					0.64	0
0.640833	0					0.640833	0					0.640833	0
0.641667	0					0.641667	0					0.641667	0
0.6425	0					0.6425	0					0.6425	0
0.643333	0					0.643333	0					0.643333	0
0.644167	0					0.644167	0					0.644167	0
0.645	0					0.645	0					0.645	0
0.645833	0					0.645833	0					0.645833	0
0.646667	0					0.646667	0					0.646667	0
0.6475	0					0.6475	0					0.6475	0
0.648333	0					0.648333	0					0.648333	0
0.649167	0					0.649167	0					0.649167	0
0.65	0					0.65	0					0.65	0
0.650833	0					0.650833	0					0.650833	0
0.651667	0					0.651667	0					0.651667	0
0.6525	0					0.6525	0					0.6525	0
0.653333	0					0.653333	0					0.653333	0
0.654167	0					0.654167	0					0.654167	0
0.655	0					0.655	0					0.655	0
0.655833	0					0.655833	0					0.655833	0
0.656667	0					0.656667	0					0.656667	0
0.6575	0					0.6575	0					0.6575	0
0.658333	0					0.658333	0					0.658333	0
0.659167	0					0.659167	0					0.659167	0
0.66	0					0.66	0					0.66	0
0.660833	0					0.660833	0					0.660833	0
0.661667	0					0.661667	0					0.661667	0
0.6625	0					0.6625	0					0.6625	0
0.663333	0					0.663333	0					0.663333	0
0.664167	0					0.664167	0					0.664167	0
0.665	0					0.665	0					0.665	0
0.665833	0					0.665833	0					0.665833	0
0.666667	0					0.666667	0					0.666667	0
0.6675	0					0.6675	0					0.6675	0
0.668333	0					0.668333	0					0.668333	0
0.669167	0					0.669167	0					0.669167	0
0.67	0					0.67	0					0.67	0
0.670833	0					0.670833	0					0.670833	0
0.671667	0					0.671667	0					0.671667	0
0.6725	0					0.6725	0					0.6725	0
0.673333	0					0.673333	0					0.673333	0
0.674167	0					0.674167	0					0.674167	0
0.675	0					0.675	0					0.675	0
0.675833	0					0.675833	0					0.675833	0
0.676667	0					0.676667	0					0.676667	0
0.6775	0					0.6775	0					0.6775	0
0.678333	0					0.678333	0					0.678333	0
0.679167	0					0.679167	0					0.679167	0
0.68	0					0.68	0					0.68	0
0.680833	0					0.680833	0					0.680833	0
0.681667	0					0.681667	0					0.681667	0
0.6825	0					0.6825	0					0.6825	0
0.683333	0					0.683333	0					0.683333	0
0.684167	0					0.684167	0					0.684167	0
0.685	0					0.685	0					0.685	0
0.685833	0					0.685833	0					0.685833	0
0.686667	0					0.686667	0					0.686667	0
0.6875	0					0.6875	0					0.6875	0
0.688333	0					0.688333	0					0.688333	0
0.689167	0					0.689167	0					0.689167	0
0.69	0					0.69	0					0.69	0
0.690833	0					0.690833	0					0.690833	0
0.691667	0					0.691667	0					0.691667	0
0.6925	0					0.6925	0					0.6925	0
0.693333	0					0.693333	0					0.693333	0
0.694167	0					0.694167	0					0.694167	0
0.695	0					0.695	0					0.695	0
0.695833	0					0.695833	0					0.695833	0
0.696667	0					0.696667	0					0.696667	0
0.6975	0					0.6975	0					0.6975	0
0.698333	0					0.698333	0					0.698333	0
0.699167	0					0.699167	0					0.699167	0
0.7	0					0.7	0					0.7	0
0.700833	0					0.700833	0					0.700833	0
0.701667	0					0.701667	0					0.701667	0
0.7025	0					0.7025	0					0.7025	0
0.703333	0					0.703333	0					0.703333	0
0.704167	0					0.704167	0					0.704167	0
0.705	0					0.705	0					0.705	0
0.705833	0					0.705833	0					0.705833	0
0.706667	0					0.706667	0					0.706667	0
0.7075	0					0.7075	0					0.7075	0
0.708333	0					0.708333	0					0.708333	0
0.709167	0					0.709167	0					0.709167	0
0.71	0					0.71	0					0.71	0
0.710833	0					0.710833	0					0.710833	0
0.711667	0					0.711667	0					0.711667	0
0.7125	0					0.7125	0					0.7125	0
0.713333	0					0.713333	0					0.713333	0
0.714167	0					0.714167	0					0.714167	0
0.715	0					0.715	0					0.715	0
0.715833	0					0.715833	0					0.715833	0
0.716667	0					0.716667	0					0.716667	0
0.7175	0					0.7175	0					0.7175	0
0.718333	0					0.718333	0					0.718333	0
0.719167	0					0.719167	0					0.719167	0
0.72	0					0.72	0					0.72	0
0.720833	0					0.720833	0					0.720833	0
0.721667	0					0.721667	0					0.721667	0
0.7225	0					0.7225	0					0.7225	0
0.723333	0					0.723333	0					0.723333	0
0.724167	0					0.724167	0					0.724167	0
0.725	0					0.725	0					0.725	0
0.725833	0					0.725833	0					0.725833	0
0.726667	0					0.726667	0					0.726667	0
0.7275	0					0.7275	0					0.7275	0
0.728333	0					0.728333	0					0.728333	0
0.729167	0					0.729167	0					0.729167	0
0.73	0					0.73	0					0.73	0
0.730833	0					0.730833	0					0.730833	0
0.731667	0					0.731667	0					0.731667	0
0.7325	0					0.7325	0					0.7325	0
0.733333	0					0.733333	0					0.733333	0
0.734167	0					0.734167	0					0.734167	0
0.735	0					0.735	0					0.735	0
0.735833	0					0.735833	0					0.735833	0
0.736667	0					0.736667	0					0.736667	0
0.7375	0					0.7375	0					0.7375	0
0.738333	0					0.738333	0					0.738333	0
0.739167	0					0.739167	0					0.739167	0
0.74	0					0.74	0					0.74	0
0.740833	0					0.740833	0					0.740833	0
0.741667	0					0.741667	0					0.741667	0
0.7425	0					0.7425	0					0.7425	0
0.743333	0					0.743333	0					0.743333	0
0.744167	0					0.744167	0					0.744167	0
0.745	0					0.745	0					0.745	0
0.745833	0					0.745833	0					0.745833	0
0.746667	0					0.746667	0					0.746667	0
0.7475	0					0.7475	0					0.7475	0
0.748333	0					0.748333	0					0.748333	0
0.749167	0					0.749167	0					0.749167	0
0.75	0					0.75	0					0.75	0
0.750833	0					0.750833	0					0.750833	0
0.751667	0					0.751667	0					0.751667	0
0.7525	0					0.7525	0					0.7525	0
0.753333	0					0.753333	0					0.753333	0
0.754167	0					0.754167	0					0.754167	0
0.755	0					0.755	0					0.755	0
0.755833	0					0.755833	0					0.755833	0
0.756667	0					0.756667	0					0.756667	0
0.7575	0					0.7575	0					0.7575	0
0.758333	0					0.758333	0					0.758333	0
0.759167	0					0.759167	0					0.759167	0
0.76	0					0.76	0					0.76	0
0.760833	0					0.760833	0					0.760833	0
0.761667	0					0.761667	0					0.761667	0
0.7625	0					0.7625	0					0.7625	0
0.763333	0					0.763333	0					0.763333	0
0.764167	0					0.764167	0					0.764167	0
0.765	0					0.765	0					0.765	0
0.765833	0					0.765833	0					0.765833	0
0.766667	0					0.766667	0					0.766667	0
0.7675	0					0.7675	0					0.7675	0
0.768333	0					0.768333	0					0.768333	0
0.769167	0					0.769167	0					0.769167	0
0.77	0					0.77	0					0.77	0
0.770833	0					0.770833	0					0.770833	0
0.771667	0					0.771667	0					0.771667	0
0.7725	0					0.7725	0					0.7725	0
0.773333	0					0.773333	0					0.773333	0
0.774167	0					0.774167	0					0.774167	0
0.775	0					0.775	0					0.775	0
0.775833	0					0.775833	0					0.775833	0
0.776667	0					0.776667	0					0.776667	0
0.7775	0					0.7775	0					0.7775	0
0.778333	0					0.778333	0					0.778333	0
0.779167	0					0.779167	0					0.779167	0
0.78	0					0.78	0					0.78	0
0.780833	0					0.780833	0					0.780833	0
0.781667	0					0.781667	0					0.781667	0
0.7825	0					0.7825	0					0.7825	0
0.783333	0					0.783333	0					0.783333	0
0.784167	0					0.784167	0					0.784167	0
0.785	0					0.785	0					0.785	0
0.785833	0					0.785833	0					0.785833	0
0.786667	0					0.786667	0					0.786667	0
0.7875	0					0.7875	0					0.7875	0
0.788333	0					0.788333	0					0.788333	0
0.789167	0					0.789167	0					0.789167	0
0.79	0					0.79	0					0.79	0
0.790833	0					0.790833	0					0.790833	0
0.791667	0					0.791667	0					0.791667	0
0.7925	0					0.7925	0					0.7925	0
0.793333	0					0.793333	0					0.793333	0
0.794167	0					0.794167	0					0.794167	0
0.795	0					0.795	0					0.795	0
0.795833	0					0.795833	0					0.795833	0
0.796667	0					0.796667	0					0.796667	0
0.7975	0					0.7975	0					0.7975	0
0.798333	0					0.798333	0					0.798333	0
0.799167	0					0.799167	0					0.799167	0
0.8	0					0.8	0					0.8	0
0.800833	0					0.800833	0					0.800833	0
0.801667	0					0.801667	0					0.801667	0
0.8025	0					0.8025	0					0.8025	0
0.803333	0					0.803333	0					0.803333	0
0.804167	0					0.804167	0					0.804167	0
0.805	0					0.805	0					0.805	0
0.805833	0					0.805833	0					0.805833	0
0.806667	0					0.806667	0					0.806667	0
0.8075	0					0.8075	0					0.8075	0
0.808333	0					0.808333	0					0.808333	0
0.809167	0					0.809167	0					0.809167	0
0.81	0					0.81	0					0.81	0
0.810833	0					0.810833	0					0.810833	0
0.811667	0					0.811667	0					0.811667	0
0.8125	0					0.8125	0					0.8125	0
0.813333	0					0.813333	0					0.813333	0
0.814167	0					0.814167	0					0.814167	0
0.815	0					0.815	0					0.815	0
0.815833	0					0.815833	0					0.815833	0
0.816667	0					0.816667	0					0.816667	0
0.8175	0					0.8175	0					0.8175	0
0.818333	0					0.818333	0					0.818333	0
0.819167	0					0.819167	0					0.819167	0
0.82	0					0.82	0					0.82	0
0.820833	0					0.820833	0					0.820833	0
0.821667	0					0.821667	0					0.821667	0
0.8225	0					0.8225	0					0.8225	0
0.823333	0					0.823333	0					0.823333	0
0.824167	0					0.824167	0					0.824167	0
0.825	0					0.825	0					0.825	0
0.825833	0					0.825833	0					0.825833	0
0.826667	0					0.826667	0					0.826667	0
0.8275	0					0.8275	0					0.8275	0
0.828333	0					0.828333	0					0.828333	0
0.829167	0					0.829167	0					0.829167	0
0.83	0					0.83	0					0.83	0
0.830833	0					0.830833	0					0.830833	0
0.831667	0					0.831667	0					0.831667	0
0.8325	0					0.8325	0					0.8325	0
0.833333	0					0.833333	0					0.833333	0
0.834167	0					0.834167	0					0.834167	0
0.835	0					0.835	0					0.835	0
0.835833	0					0.835833	0					0.835833	0
0.836667	0					0.836667	0					0.836667	0
0.8375	0					0.8375	0					0.8375	0
0.838333	0					0.838333	0					0.838333	0
0.839167	0					0.839167	0					0.839167	0
0.84	0					0.84	0					0.84	0
0.840833	0					0.840833	0					0.840833	0
0.841667	0					0.841667	0					0.841667	0
0.8425	0					0.8425	0					0.8425	0
0.843333	0					0.843333	0					0.843333	0
0.844167	0					0.844167	0					0.844167	0
0.845	0					0.845	0					0.845	0
0.845833	0					0.845833	0					0.845833	0
0.846667	0					0.846667	0					0.846667	0
0.8475	0					0.8475	0					0.8475	0
0.848333	0					0.848333	0					0.848333	0
0.849167	0					0.849167	0					0.849167	0
0.85	0					0.85	0					0.85	0
0.850833	0					0.850833	0					0.850833	0
0.851667	0					0.851667	0					0.851667	0
0.8525	0					0.8525	0					0.8525	0
0.853333	0					0.853333	0					0.853333	0
0.854167	0					0.854167	0					0.854167	0
0.855	0					0.855	0					0.855	0
0.855833	0					0.855833	0					0.855833	0
0.856667	0					0.856667	0					0.856667	0
0.8575	0					0.8575	0					0.8575	0
0.858333	0					0.858333	0					0.858333	0
0.859167	0					0.859167	0					0.859167	0
0.86	0					0.86	0					0.86	0
0.860833	0					0.860833	0					0.860833	0
0.861667	0					0.861667	0					0.861667	0
0.8625	0					0.8625	0					0.8625	0
0.863333	0					0.863333	0					0.863333	0
0.864167	0					0.864167	0					0.864167	0
0.865	0					0.865	0					0.865	0
0.865833	0					0.865833	0					0.865833	0
0.866667	0					0.866667	0					0.866667	0
0.8675	0					0.8675	0					0.8675	0
0.868333	0					0.868333	0					0.868333	0
0.869167	0					0.869167	0					0.869167	0
0.87	0					0.87	0					0.87	0
0.870833	0					0.870833	0					0.870833	0
0.871667	0					0.871667	0					0.871667	0
0.8725	0					0.8725	0					0.8725	0
0.873333	0					0.873333	0					0.873333	0
0.874167	0					0.874167	0					0.874167	0
0.875	0					0.875	0					0.875	0
0.875833	0					0.875833	0					0.875833	0
0.876667	0					0.876667	0					0.876667	0
0.8775	0					0.8775	0					0.8775	0
0.878333	0					0.878333	0					0.878333	0
0.879167	0					0.879167	0					0.879167	0
0.88	0					0.88	0					0.88	0
0.880833	0					0.880833	0					0.880833	0
0.881667	0					0.881667	0					0.881667	0
0.8825	0					0.8825	0					0.8825	0
0.883333	0					0.883333	0					0.883333	0
0.884167	0					0.884167	0					0.884167	0
0.885	0					0.885	0					0.885	0
0.885833	0					0.885833	0					0.885833	0
0.886667	0					0.886667	0					0.886667	0
0.8875	0					0.8875	0					0.8875	0
0.888333	0					0.888333	0					0.888333	0
0.889167	0					0.889167	0					0.889167	0
0.89	0					0.89	0					0.89	0
0.890833	0					0.890833	0					0.890833	0
0.891667	0					0.891667	0					0.891667	0
0.8925	0					0.8925	0					0.8925	0
0.893333	0					0.893333	0					0.893333	0
0.894167	0					0.894167	0					0.894167	0
0.895	0					0.895	0					0.895	0
0.895833	0					0.895833	0					0.895833	0
0.896667	0					0.896667	0					0.896667	0
0.8975	0					0.8975	0					0.8975	0
0.898333	0					0.898333	0					0.898333	0
0.899167	0					0.899167	0					0.899167	0
0.9	0					0.9	0					0.9	0
0.900833	0					0.900833	0					0.900833	0
0.901667	0					0.901667	0					0.901667	0
0.9025	0					0.9025	0					0.9025	0
0.903333	0					0.903333	0					0.903333	0
0.904167	0					0.904167	0					0.904167	0
0.905	0					0.905	0					0.905	0
0.905833	0					0.905833	0					0.905833	0
0.906667	0					0.906667	0					0.906667	0
0.9075	0					0.9075	0					0.9075	0
0.908333	0					0.908333	0					0.908333	0
0.909167	0					0.909167	0					0.909167	0
0.91	0					0.91	0					0.91	0
0.910833	0					0.910833	0					0.910833	0
0.911667	0					0.911667	0					0.911667	0
0.9125	0					0.9125	0					0.9125	0
0.913333	0					0.913333	0					0.913333	0
0.914167	0					0.914167	0					0.914167	0
0.915	0					0.915	0					0.915	0
0.915833	0					0.915833	0					0.915833	0
0.916667	0					0.916667	0					0.916667	0
0.9175	0					0.9175	0					0.9175	0
0.918333	0					0.918333	0					0.918333	0
0.919167	0					0.919167	0					0.919167	0
0.92	0					0.92	0					0.92	0
0.920833	0					0.920833	0					0.920833	0
0.921667	0					0.921667	0					0.921667	0
0.9225	0					0.9225	0					0.9225	0
0.923333	0					0.923333	0					0.923333	0
0.924167	0					0.924167	0					0.924167	0
0.925	0					0.925	0					0.925	0
0.925833	0					0.925833	0					0.925833	0
0.926667	0					0.926667	0					0.926667	0
0.9275	0					0.9275	0					0.9275	0
0.928333	0					0.928333	0					0.928333	0
0.929167	0					0.929167	0					0.929167	0
0.93	0					0.93	0					0.93	0
0.930833	0					0.930833	0					0.930833	0
0.931667	0					0.931667	0					0.931667	0
0.9325	0					0.9325	0					0.9325	0
0.933333	0					0.933333	0					0.933333	0
0.934167	0					0.934167	0					0.934167	0
0.935	0					0.935	0					0.935	0
0.935833	0					0.935833	0					0.935833	0
0.936667	0					0.936667	0					0.936667	0
0.9375	0					0.9375	0					0.9375	0
0.938333	0					0.938333	0					0.938333	0
0.939167	0					0.939167	0					0.939167	0
0.94	0					0.94	0					0.94	0
0.940833	0					0.940833	0					0.940833	0
0.941667	0					0.941667	0					0.941667	0
0.9425	0					0.9425	0					0.9425	0
0.943333	0					0.943333	0					0.943333	0
0.944167	0					0.944167	0					0.944167	0
0.945	0					0.945	0					0.945	0
0.945833	0					0.945833	0					0.945833	0
0.946667	0					0.946667	0					0.946667	0
0.9475	0					0.9475	0					0.9475	0
0.948333	0					0.948333	0					0.948333	0
0.949167	0					0.949167	0					0.949167	0
0.95	0					0.95	0					0.95	0
0.950833	0					0.950833	0					0.950833	0
0.951667	0					0.951667	0					0.951667	0
0.9525	0					0.9525	0					0.9525	0
0.953333	0					0.953333	0					0.953333	0
0.954167	0					0.954167	0					0.954167	0
0.955	0					0.955	0					0.955	0
0.955833	0					0.955833	0					0.955833	0
0.956667	0					0.956667	0					0.956667	0
0.9575	0					0.9575	0					0.9575	0
0.958333	0					0.958333	0					0.958333	0
0.959167	0					0.959167	0					0.959167	0
0.96	0					0.96	0					0.96	0
0.960833	0					0.960833	0					0.960833	0
0.961667	0					0.961667	0					0.961667	0
0.9625	0					0.9625	0					0.9625	0
0.963333	0					0.963333	0					0.963333	0
0.964167	0					0.964167	0					0.964167	0
0.965	0					0.965	0					0.965	0
0.965833	0					0.965833	0					0.965833	0
0.966667	0					0.966667	0					0.966667	0
0.9675	0					0.9675	0					0.9675	0
0.968333	0					0.968333	0					0.968333	0
0.969167	0					0.969167	0					0.969167	0
0.97	0					0.97	0					0.97	0
0.970833	0					0.970833	0					0.970833	0
0.971667	0					0.971667	0					0.971667	0
0.9725	0					0.9725	0					0.9725	0
0.973333	0					0.973333	0					0.973333	0
0.974167	0					0.974167	0					0.974167	0
0.975	0					0.975	0					0.975	0
0.975833	0					0.975833	0					0.975833	0
0.976667	0					0.976667	0					0.976667	0
0.9775	0					0.9775	0					0.9775	0
0.978333	0					0.978333	0					0.978333	0
0.979167	0					0.979167	0					0.979167	0
0.98	0					0.98	0					0.98	0
0.980833	0					0.980833	0					0.980833	0
0.981667	0					0.981667	0					0.981667	0
0.9825	0					0.9825	0					0.9825	0
0.983333	0					0.983333	0					0.983333	0
0.984167	0					0.984167	0					0.984167	0
0.985	0					0.985	0					0.985	0
0.985833	0					0.985833	0					0.985833	0
0.986667	0					0.986667	0					0.986667	0
0.9875	0					0.9875	0					0.9875	0
0.988333	0					0.988333	0					0.988333	0
0.989167	0					0.989167	0					0.989167	0
0.99	0					0.99	0					0.99	0
0.990833	0					0.990833	0					0.990833	0
0.991667	0					0.991667	0					0.991667	0
0.9925	0					0.9925	0					0.9925	0
0.993333	0					0.993333	0					0.993333	0
0.994167	0					0.994167	0					0.994167	0
0.995	0					0.995	0					0.995	0
0.995833	0					0.995833	0					0.995833	0
0.996667	0					0.996667	0					0.996667	0
0.9975	0					0.9975	0					0.9975	0
0.998333	0					0.998333	0					0.998333	0
0.999167	0					0.999167	0					0.999167	0
1	0					1	0					1	0
1.00083	0					1.00083	0					1.00083	0
1.00167	0					1.00167	0					1.00167	0
1.0025	0					1.0025	0					1.0025	0
1.00333	0					1.00333	0					1.00333	0
1.00417	0					1.00417	0					1.00417	0
1.005	0					1.005	0					1.005	0
1.00583	0					1.00583	0					1.00583	0
1.00667	0					1.00667	0					1.00667	0
1.0075	0					1.0075	0					1.0075	0
1.00833	0					1.00833	0					1.00833	0
1.00917	0					1.00917	0					1.00917	0
1.01	0					1.01	0					1.01	0
1.01083	0					1.01083	0					1.01083	0
1.01167	0					1.01167	0					1.01167	0
1.0125	0					1.0125	0					1.0125	0
1.01333	0					1.01333	0					1.01333	0
1.01417	0					1.01417	0					1.01417	0
1.015	0					1.015	0					1.015	0
1.01583	0					1.01583	0					1.01583	0
1.01667	0					1.01667	0					1.01667	0
1.0175	0					1.0175	0					1.0175	0
1.01833	0					1.01833	0					1.01833	0
1.01917	0					1.01917	0					1.01917	0
1.02	0					1.02	0					1.02	0
1.02083	0					1.02083	0					1.02083	0
1.02167	0					1.02167	0					1.02167	0
1.0225	0					1.0225	0					1.0225	0
1.02333	0					1.02333	0					1.02333	0
1.02417	0					1.02417	0					1.02417	0
1.025	0					1.025	0					1.025	0
1.02583	0					1.02583	0					1.02583	0
1.02667	0					1.02667	0					1.02667	0
1.0275	0					1.0275	0					1.0275	0
1.02833	0					1.02833	0					1.02833	0
1.02917	0					1.02917	0					1.02917	0
1.03	0					1.03	0					1.03	0
1.03083	0					1.03083	0					1.03083	0
1.03167	0					1.03167	0					1.03167	0
1.0325	0					1.0325	0					1.0325	0
1.03333	0					1.03333	0					1.03333	0
1.03417	0					1.03417	0					1.03417	0
1.035	0					1.035	0					1.035	0
1.03583	0					1.03583	0					1.03583	0
1.03667	0					1.03667	0					1.03667	0
1.0375	0					1.0375	0					1.0375	0
1.03833	0					1.03833	0					1.03833	0
1.03917	0					1.03917	0					1.03917	0
1.04	0					1.04	0					1.04	0
1.04083	0					1.04083	0					1.04083	0
1.04167	0					1.04167	0					1.04167	0
1.0425	0					1.0425	0					1.0425	0
1.04333	0					1.04333	0					1.04333	0
1.04417	0					1.04417	0					1.04417	0
1.045	0					1.045	0					1.045	0
1.04583	0					1.04583	0					1.04583	0
1.04667	0					1.04667	0					1.04667	0
1.0475	0					1.0475	0					1.0475	0
1.04833	0					1.04833	0					1.04833	0
1.04917	0					1.04917	0					1.04917	0
1.05	0					1.05	0					1.05	0
1.05083	0					1.05083	0					1.05083	0
1.05167	0					1.05167	0					1.05167	0
1.0525	0					1.0525	0					1.0525	0
1.05333	0					1.05333	0					1.05333	0
1.05417	0					1.05417	0					1.05417	0
1.055	0					1.055	0					1.055	0
1.05583	0					1.05583	0					1.05583	0
1.05667	0					1.05667	0					1.05667	0
1.0575	0					1.0575	0					1.0575	0
1.05833	0					1.05833	0					1.05833	0
1.05917	0					1.05917	0					1.05917	0
1.06	0					1.06	0					1.06	0
1.06083	0					1.06083	0					1.06083	0
1.06167	0					1.06167	0					1.06167	0
1.0625	0					1.0625	0					1.0625	0
1.06333	0					1.06333	0					1.06333	0
1.06417	0					1.06417	0					1.06417	0
1.065	0					1.065	0					1.065	0
1.06583	0					1.06583	0					1.06583	0
1.06667	0					1.06667	0					1.06667	0
1.0675	0					1.0675	0					1.0675	0
1.06833	0					1.06833	0					1.06833	0
1.06917	0					1.06917	0					1.06917	0
1.07	0					1.07	0					1.07	0
1.07083	0					1.07083	0					1.07083	0
1.07167	0					1.07167	0					1.07167	0
1.0725	0					1.0725	0					1.0725	0
1.07333	0					1.07333	0					1.07333	0
1.07417	0					1.07417	0					1.07417	0
1.075	0					1.075	0					1.075	0
1.07583	0					1.07583	0					1.07583	0
1.07667	0					1.07667	0					1.07667	0
1.0775	0					1.0775	0					1.0775	0
1.07833	0					1.07833	0					1.07833	0
1.07917	0					1.07917	0					1.07917	0
1.08	0					1.08	0					1.08	0
1.08083	0					1.08083	0					1.08083	0
1.08167	0					1.08167	0					1.08167	0
1.0825	0					1.0825	0					1.0825	0
1.08333	0					1.08333	0					1.08333	0
1.08417	0					1.08417	0					1.08417	0
1.085	0					1.085	0					1.085	0
1.08583	0					1.08583	0					1.08583	0
1.08667	0					1.08667	0					1.08667	0
1.0875	0					1.0875	0					1.0875	0
1.08833	0					1.08833	0					1.08833	0
1.08917	0					1.08917	0					1.08917	0
1.09	0					1.09	0					1.09	0
1.09083	0					1.09083	0					1.09083	0
1.09167	0					1.09167	0					1.09167	0
1.0925	0					1.0925	0					1.0925	0
1.09333	0					1.09333	0					1.09333	0
1.09417	0					1.09417	0					1.09417	0
1.095	0					1.095	0					1.095	0
1.09583	0					1.09583	0					1.09583	0
1.09667	0					1.09667	0					1.09667	0
1.0975	0					1.0975	0					1.0975	0
1.09833	0					1.09833	0					1.09833	0
1.09917	0					1.09917	0					1.09917	0
1.1	0					1.1	0					1.1	0
1.10083	0					1.10083	0					1.10083	0
1.10167	0					1.10167	0					1.10167	0
1.1025	0					1.1025	0					1.1025	0
1.10333	0					1.10333	0					1.10333	0
1.10417	0					1.10417	0					1.10417	0
1.105	0					1.105	0					1.105	0
1.10583	0					1.10583	0					1.10583	0
1.10667	0					1.10667	0					1.10667	0
1.1075	0					1.1075	0					1.1075	0
1.10833	0					1.10833	0					1.10833	0
1.10917	0					1.10917	0					1.10917	0
1.11	0					1.11	0					1.11	0
1.11083	0					1.11083	0					1.11083	0
1.11167	0					1.11167	0					1.11167	0
1.1125	0					1.1125	0					1.1125	0
1.11333	0					1.11333	0					1.11333	0
1.11417	0					1.11417	0					1.11417	0
1.115	0					1.115	0					1.115	0
1.11583	0					1.11583	0					1.11583	0
1.11667	0					1.11667	0					1.11667	0
1.1175	0					1.1175	0					1.1175	0
1.11833	0					1.11833	0					1.11833	0
1.11917	0					1.11917	0					1.11917	0
1.12	0					1.12	0					1.12	0
1.12083	0					1.12083	0					1.12083	0
1.12167	0					1.12167	0					1.12167	0
1.1225	0					1.1225	0					1.1225	0
1.12333	0					1.12333	0					1.12333	0
1.12417	0					1.12417	0					1.12417	0
1.125	0					1.125	0					1.125	0
1.12583	0					1.12583	0					1.12583	0
1.12667	0					1.12667	0					1.12667	0
1.1275	0					1.1275	0					1.1275	0
1.12833	0					1.12833	0					1.12833	0
1.12917	0					1.12917	0					1.12917	0
1.13	0					1.13	0					1.13	0
1.13083	0					1.13083	0					1.13083	0
1.13167	0					1.13167	0					1.13167	0
1.1325	0					1.1325	0					1.1325	0
1.13333	0					1.13333	0					1.13333	0
1.13417	0					1.13417	0					1.13417	0
1.135	0					1.135	0					1.135	0
1.13583	0					1.13583	0					1.13583	0
1.13667	0					1.13667	0					1.13667	0
1.1375	0					1.1375	0					1.1375	0
1.13833	0					1.13833	0					1.13833	0
1.13917	0					1.13917	0					1.13917	0
1.14	0					1.14	0					1.14	0
1.14083	0					1.14083	0					1.14083	0
1.14167	0					1.14167	0					1.14167	0
1.1425	0					1.1425	0					1.1425	0
1.14333	0					1.14333	0					1.14333	0
1.14417	0					1.14417	0					1.14417	0
1.145	0					1.145	0					1.145	0
1.14583	0					1.14583	0					1.14583	0
1.14667	0					1.14667	0					1.14667	0
1.1475	0					1.1475	0					1.1475	0
1.14833	0					1.14833	0					1.14833	0
1.14917	0					1.14917	0					1.14917	0
1.15	0					1.15	0					1.15	0
1.15083	0					1.15083	0					1.15083	0
1.15167	0					1.15167	0					1.15167	0
1.1525	0					1.1525	0					1.1525	0
1.15333	0					1.15333	0					1.15333	0
1.15417	0					1.15417	0					1.15417	0
1.155	0					1.155	0					1.155	0
1.15583	0					1.15583	0					1.15583	0
1.15667	0					1.15667	0					1.15667	0
1.1575	0					1.1575	0					1.1575	0
1.15833	0					1.15833	0					1.15833	0
1.15917	0					1.15917	0					1.15917	0
1.16	0					1.16	0					1.16	0
1.16083	0					1.16083	0					1.16083	0
1.16167	0					1.16167	0					1.16167	0
1.1625	0					1.1625	0					1.1625	0
1.16333	0					1.16333	0					1.16333	0
1.16417	0					1.16417	0					1.16417	0
1.165	0					1.165	0					1.165	0
1.16583	0					1.16583	0					1.16583	0
1.16667	0					1.16667	0					1.16667	0
1.1675	0					1.1675	0					1.1675	0
1.16833	0					1.16833	0					1.16833	0
1.16917	0					1.16917	0					1.16917	0
1.17	0					1.17	0					1.17	0
1.17083	0					1.17083	0					1.17083	0
1.17167	0					1.17167	0					1.17167	0
1.1725	0					1.1725	0					1.1725	0
1.17333	0					1.17333	0					1.17333	0
1.17417	0					1.17417	0					1.17417	0
1.175	0					1.175	0					1.175	0
1.17583	0					1.17583	0					1.17583	0
1.17667	0					1.17667	0					1.17667	0
1.1775	0					1.1775	0					1.1775	0
1.17833	0					1.17833	0					1.17833	0
1.17917	0					1.17917	0					1.17917	0
1.18	0					1.18	0					1.18	0
1.18083	0					1.18083	0					1.18083	0
1.18167	0					1.18167	0					1.18167	0
1.1825	0					1.1825	0					1.1825	0
1.18333	0					1.18333	0					1.18333	0
1.18417	0					1.18417	0					1.18417	0
1.185	0					1.185	0					1.185	0
1.18583	0					1.18583	0					1.18583	0
1.18667	0					1.18667	0					1.18667	0
1.1875	0					1.1875	0					1.1875	0
1.18833	0					1.18833	0					1.18833	0
1.18917	0					1.18917	0					1.18917	0
1.19	0					1.19	0					1.19	0
1.19083	0					1.19083	0					1.19083	0
1.19167	0					1.19167	0					1.19167	0
1.1925	0					1.1925	0					1.1925	0
1.19333	0					1.19333	0					1.19333	0
1.19417	0					1.19417	0					1.19417	0
1.195	0					1.195	0					1.195	0
1.19583	0					1.19583	0					1.19583	0
1.19667	0					1.19667	0					1.19667	0
1.1975	0					1.1975	0					1.1975	0
1.19833	0					1.19833	0					1.19833	0
1.19917	0					1.19917	0					1.19917	0
1.2	0					1.2	0					1.2	0
1.20083	0					1.20083	0					1.20083	0
1.20167	0					1.20167	0					1.20167	0
1.2025	0					1.2025	0					1.2025	0
1.20333	0					1.20333	0					1.20333	0
1.20417	0					1.20417	0					1.20417	0
1.205	0					1.205	0					1.205	0
1.20583	0					1.20583	0					1.20583	0
1.20667	0					1.20667	0					1.20667	0
1.2075	0					1.2075	0					1.2075	0
1.20833	0					1.20833	0					1.20833	0
1.20917	0					1.20917	0					1.20917	0
1.21	0					1.21	0					1.21	0
1.21083	0					1.21083	0					1.21083	0
1.21167	0					1.21167	0					1.21167	0
1.2125	0					1.2125	0					1.2125	0
1.21333	0					1.21333	0					1.21333	0
1.21417	0					1.21417	0					1.21417	0
1.215	0					1.215	0					1.215	0
1.21583	0					1.21583	0					1.21583	0
1.21667	0					1.21667	0					1.21667	0
1.2175	0					1.2175	0					1.2175	0
1.21833	0					1.21833	0					1.21833	0
1.21917	0					1.21917	0					1.21917	0
1.22	0					1.22	0					1.22	0
1.22083	0					1.22083	0					1.22083	0
1.22167	0					1.22167	0					1.22167	0
1.2225	0					1.2225	0					1.2225	0
1.22333	0					1.22333	0					1.22333	0
1.22417	0					1.22417	0					1.22417	0
1.225	0					1.225	0					1.225	0
1.22583	0					1.22583	0					1.22583	0
1.22667	0					1.22667	0					1.22667	0
1.2275	0					1.2275	0					1.2275	0
1.22833	0					1.22833	0					1.22833	0
1.22917	0					1.22917	0					1.22917	0
1.23	0					1.23	0					1.23	0
1.23083	0					1.23083	0					1.23083	0
1.23167	0					1.23167	0					1.23167	0
1.2325	0					1.2325	0					1.2325	0
1.23333	0					1.23333	0					1.23333	0
1.23417	0					1.23417	0					1.23417	0
1.235	0					1.235	0					1.235	0
1.23583	0					1.23583	0					1.23583	0
1.23667	0					1.23667	0					1.23667	0
1.2375	0					1.2375	0					1.2375	0
1.23833	0					1.23833	0					1.23833	0
1.23917	0					1.23917	0					1.23917	0
1.24	0					1.24	0					1.24	0
1.24083	0					1.24083	0					1.24083	0
1.24167	0					1.24167	0					1.24167	0
1.2425	0					1.2425	0					1.2425	0
1.24333	0					1.24333	0					1.24333	0
1.24417	0					1.24417	0					1.24417	0
1.245	0					1.245	0					1.245	0
1.24583	0					1.24583	0					1.24583	0
1.24667	0					1.24667	0					1.24667	0
1.2475	0					1.2475	0					1.2475	0
1.24833	0					1.24833	0					1.24833	0
1.24917	0					1.24917	0					1.24917	0
1.25	0					1.25	0					1.25	0
1.25083	0					1.25083	0					1.25083	0
1.25167	0					1.25167	0					1.25167	0
1.2525	0					1.2525	0					1.2525	0
1.25333	0					1.25333	0					1.25333	0
1.25417	0					1.25417	0					1.25417	0
1.255	0					1.255	0					1.255	0
1.25583	0					1.25583	0					1.25583	0
1.25667	0					1.25667	0					1.25667	0
1.2575	0					1.2575	0					1.2575	0
1.25833	0					1.25833	0					1.25833	0
1.25917	0					1.25917	0					1.25917	0
1.26	0					1.26	0					1.26	0
1.26083	0					1.26083	0					1.26083	0
1.26167	0					1.26167	0					1.26167	0
1.2625	0					1.2625	0					1.2625	0
1.26333	0					1.26333	0					1.26333	0
1.26417	0					1.26417	0					1.26417	0
1.265	0					1.265	0					1.265	0
1.26583	0					1.26583	0					1.26583	0
1.26667	0					1.26667	0					1.26667	0
1.2675	0					1.2675	0					1.2675	0
1.26833	0					1.26833	0					1.26833	0
1.26917	0					1.26917	0					1.26917	0
1.27	0					1.27	0					1.27	0
1.27083	0					1.27083	0					1.27083	0
1.27167	0					1.27167	0					1.27167	0
1.2725	0					1.2725	0					1.2725	0
1.27333	0					1.27333	0					1.27333	0
1.27417	0					1.27417	0					1.27417	0
1.275	0					1.275	0					1.275	0
1.27583	0					1.27583	0					1.27583	0
1.27667	0					1.27667	0					1.27667	0
1.2775	0					1.2775	0					1.2775	0
1.27833	0					1.27833	0					1.27833	0
1.27917	0					1.27917	0					1.27917	0
1.28	0					1.28	0					1.28	0
1.28083	0					1.28083	0					1.28083	0
1.28167	0					1.28167	0					1.28167	0
1.2825	0					1.2825	0					1.2825	0
1.28333	0					1.28333	0					1.28333	0
1.28417	0					1.28417	0					1.28417	0
1.285	0					1.285	0					1.285	0
1.28583	0					1.28583	0					1.28583	0
1.28667	0					1.28667	0					1.28667	0
1.2875	0					1.2875	0					1.2875	0
1.28833	0					1.28833	0					1.28833	0
1.28917	0					1.28917	0					1.28917	0
1.29	0					1.29	0					1.29	0
1.29083	0					1.29083	0					1.29083	0
1.29167	0					1.29167	0					1.29167	0
1.2925	0					1.2925	0					1.2925	0
1.29333	0					1.29333	0					1.29333	0
1.29417	0					1.29417	0					1.29417	0
1.295	0					1.295	0					1.295	0
1.29583	0					1.29583	0					1.29583	0
1.29667	0					1.29667	0					1.29667	0
1.2975	0					1.2975	0					1.2975	0
1.29833	0					1.29833	0					1.29833	0
1.29917	0					1.29917	0					1.29917	0
1.3	0					1.3	0					1.3	0
1.30083	0					1.30083	0					1.30083	0
1.30167	0					1.30167	0					1.30167	0
1.3025	0					1.3025	0					1.3025	0
1.30333	0					1.30333	0					1.30333	0
1.30417	0					1.30417	0					1.30417	0
1.305	0					1.305	0					1.305	0
1.30583	0					1.30583	0					1.30583	0
1.30667	0					1.30667	0					1.30667	0
1.3075	0					1.3075	0					1.3075	0
1.30833	0					1.30833	0					1.30833	0
1.30917	0					1.30917	0					1.30917	0
1.31	0					1.31	0					1.31	0
1.31083	0					1.31083	0					1.31083	0
1.31167	0					1.31167	0					1.31167	0
1.3125	0					1.3125	0					1.3125	0
1.31333	0					1.31333	0					1.31333	0
1.31417	0					1.31417	0					1.31417	0
1.315	0					1.315	0					1.315	0
1.31583	0					1.31583	0					1.31583	0
1.31667	0					1.31667	0					1.31667	0
1.3175	0					1.3175	0					1.3175	0
1.31833	0					1.31833	0					1.31833	0
1.31917	0					1.31917	0					1.31917	0
1.32	0					1.32	0					1.32	0
1.32083	0					1.32083	0					1.32083	0
1.32167	0					1.32167	0					1.32167	0
1.3225	0					1.3225	0					1.3225	0
1.32333	0					1.32333	0					1.32333	0
1.32417	0					1.32417	0					1.32417	0
1.325	0					1.325	0					1.325	0
1.32583	0					1.32583	0					1.32583	0
1.32667	0					1.32667	0					1.32667	0
1.3275	0					1.3275	0					1.3275	0
1.32833	0					1.32833	0					1.32833	0
1.32917	0					1.32917	0					1.32917	0
1.33	0					1.33	0					1.33	0
1.33083	0					1.33083	0					1.33083	0
1.33167	0					1.33167	0					1.33167	0
1.3325	0					1.3325	0					1.3325	0
1.33333	0					1.33333	0					1.33333	0
1.33417	0					1.33417	0					1.33417	0
1.335	0					1.335	0					1.335	0
1.33583	0					1.33583	0					1.33583	0
1.33667	0					1.33667	0					1.33667	0
1.3375	0					1.3375	0					1.3375	0
1.33833	0					1.33833	0					1.33833	0
1.33917	0					1.33917	0					1.33917	0
1.34	0					1.34	0					1.34	0
1.34083	0					1.34083	0					1.34083	0
1.34167	0					1.34167	0					1.34167	0
1.3425	0					1.3425	0					1.3425	0
1.34333	0					1.34333	0					1.34333	0
1.34417	0					1.34417	0					1.34417	0
1.345	0					1.345	0					1.345	0
1.34583	0					1.34583	0					1.34583	0
1.34667	0					1.34667	0					1.34667	0
1.3475	0					1.3475	0					1.3475	0
1.34833	0					1.34833	0					1.34833	0
1.34917	0					1.34917	0					1.34917	0
1.35	0					1.35	0					1.35	0
1.35083	0					1.35083	0					1.35083	0
1.35167	0					1.35167	0					1.35167	0
1.3525	0					1.3525	0					1.3525	0
1.35333	0					1.35333	0					1.35333	0
1.35417	0					1.35417	0					1.35417	0
1.355	0					1.355	0					1.355	0
1.35583	0					1.35583	0					1.35583	0
1.35667	0					1.35667	0					1.35667	0
1.3575	0					1.3575	0					1.3575	0
1.35833	0					1.35833	0					1.35833	0
1.35917	0					1.35917	0					1.35917	0
1.36	0					1.36	0					1.36	0
1.36083	0					1.36083	0					1.36083	0
1.36167	0					1.36167	0					1.36167	0
1.3625	0					1.3625	0					1.3625	0
1.36333	0					1.36333	0					1.36333	0
1.36417	0					1.36417	0					1.36417	0
1.365	0					1.365	0					1.365	0
1.36583	0					1.36583	0					1.36583	0
1.36667	0					1.36667	0					1.36667	0
1.3675	0					1.3675	0					1.3675	0
1.36833	0					1.36833	0					1.36833	0
1.36917	0					1.36917	0					1.36917	0
1.37	0					1.37	0					1.37	0
1.37083	0					1.37083	0					1.37083	0
1.37167	0					1.37167	0					1.37167	0
1.3725	0					1.3725	0					1.3725	0
1.37333	0					1.37333	0					1.37333	0
1.37417	0					1.37417	0					1.37417	0
1.375	0					1.375	0					1.375	0
1.37583	0					1.37583	0					1.37583	0
1.37667	0					1.37667	0					1.37667	0
1.3775	0					1.3775	0					1.3775	0
1.37833	0					1.37833	0					1.37833	0
1.37917	0					1.37917	0					1.37917	0
1.38	0					1.38	0					1.38	0
1.38083	0					1.38083	0					1.38083	0
1.38167	0					1.38167	0					1.38167	0
1.3825	0					1.3825	0					1.3825	0
1.38333	0					1.38333	0					1.38333	0
1.38417	0					1.38417	0					1.38417	0
1.385	0					1.385	0					1.385	0
1.38583	0					1.38583	0					1.38583	0
1.38667	0					1.38667	0					1.38667	0
1.3875	0					1.3875	0					1.3875	0
1.38833	0					1.38833	0					1.38833	0
1.38917	0					1.38917	0					1.38917	0
1.39	0					1.39	0					1.39	0
1.39083	0					1.39083	0					1.39083	0
1.39167	0					1.39167	0					1.39167	0
1.3925	0					1.3925	0					1.3925	0
1.39333	0					1.39333	0					1.39333	0
1.39417	0					1.39417	0					1.39417	0
1.395	0					1.395	0					1.395	0
1.39583	0					1.39583	0					1.39583	0
1.39667	0					1.39667	0					1.39667	0
1.3975	0					1.3975	0					1.3975	0
1.39833	0					1.39833	0					1.39833	0
1.39917	0					1.39917	0					1.39917	0
1.4	0					1.4	0					1.4	0
1.40083	0					1.40083	0					1.40083	0
1.40167	0					1.40167	0					1.40167	0
1.4025	0					1.4025	0					1.4025	0
1.40333	0					1.40333	0					1.40333	0
1.40417	0					1.40417	0					1.40417	0
1.405	0					1.405	0					1.405	0
1.40583	0					1.40583	0					1.40583	0
1.40667	0					1.40667	0					1.40667	0
1.4075	0					1.4075	0					1.4075	0
1.40833	0					1.40833	0					1.40833	0
1.40917	0					1.40917	0					1.40917	0
1.41	0					1.41	0					1.41	0
1.41083	0					1.41083	0					1.41083	0
1.41167	0					1.41167	0					1.41167	0
1.4125	0					1.4125	0					1.4125	0
1.41333	0					1.41333	0					1.41333	0
1.41417	0					1.41417	0					1.41417	0
1.415	0					1.415	0					1.415	0
1.41583	0					1.41583	0					1.41583	0
1.41667	0					1.41667	0					1.41667	0
1.4175	0					1.4175	0					1.4175	0
1.41833	0					1.41833	0					1.41833	0
1.41917	0					1.41917	0					1.41917	0
1.42	0					1.42	0					1.42	0
1.42083	0					1.42083	0					1.42083	0
1.42167	0					1.42167	0					1.42167	0
1.4225	0					1.4225	0					1.4225	0
1.42333	0					1.42333	0					1.42333	0
1.42417	0					1.42417	0					1.42417	0
1.425	0					1.425	0					1.425	0
1.42583	0					1.42583	0					1.42583	0
1.42667	0					1.42667	0					1.42667	0
1.4275	0					1.4275	0					1.4275	0
1.42833	0					1.42833	0					1.42833	0
1.42917	0					1.42917	0					1.42917	0
1.43	0					1.43	0					1.43	0
1.43083	0					1.43083	0					1.43083	0
1.43167	0					1.43167	0					1.43167	0
1.4325	0					1.4325	0					1.4325	0
1.43333	0					1.43333	0					1.43333	0
1.43417	0					1.43417	0					1.43417	0
1.435	0					1.435	0					1.435	0
1.43583	0					1.43583	0					1.43583	0
1.43667	0					1.43667	0					1.43667	0
1.4375	0					1.4375	0					1.4375	0
1.43833	0					1.43833	0					1.43833	0
1.43917	0					1.43917	0					1.43917	0
1.44	0					1.44	0					1.44	0
1.44083	0					1.44083	0					1.44083	0
1.44167	0					1.44167	0					1.44167	0
1.4425	0					1.4425	0					1.4425	0
1.44333	0					1.44333	0					1.44333	0
1.44417	0					1.44417	0					1.44417	0
1.445	0					1.445	0					1.445	0
1.44583	0					1.44583	0					1.44583	0
1.44667	0					1.44667	0					1.44667	0
1.4475	0					1.4475	0					1.4475	0
1.44833	0					1.44833	0					1.44833	0
1.44917	0					1.44917	0					1.44917	0
1.45	0					1.45	0					1.45	0
1.45083	0					1.45083	0					1.45083	0
1.45167	0					1.45167	0					1.45167	0
1.4525	0					1.4525	0					1.4525	0
1.45333	0					1.45333	0					1.45333	0
1.45417	0					1.45417	0					1.45417	0
1.455	0					1.455	0					1.455	0
1.45583	0					1.45583	0					1.45583	0
1.45667	0					1.45667	0					1.45667	0
1.4575	0					1.4575	0					1.4575	0
1.45833	0					1.45833	0					1.45833	0
1.45917	0					1.45917	0					1.45917	0
1.46	0					1.46	0					1.46	0
1.46083	0					1.46083	0					1.46083	0
1.46167	0					1.46167	0					1.46167	0
1.4625	0					1.4625	0					1.4625	0
1.46333	0					1.46333	0					1.46333	0
1.46417	0					1.46417	0					1.46417	0
1.465	0					1.465	0					1.465	0
1.46583	0					1.46583	0					1.46583	0
1.46667	0					1.46667	0					1.46667	0
1.4675	0					1.4675	0					1.4675	0
1.46833	0					1.46833	0					1.46833	0
1.46917	0					1.46917	0					1.46917	0
1.47	0					1.47	0					1.47	0
1.47083	0					1.47083	0					1.47083	0
1.47167	0					1.47167	0					1.47167	0
1.4725	0					1.4725	0					1.4725	0
1.47333	0					1.47333	0					1.47333	0
1.47417	0					1.47417	0					1.47417	0
1.475	0					1.475	0					1.475	0
1.47583	0					1.47583	0					1.47583	0
1.47667	0					1.47667	0					1.47667	0
1.4775	0					1.4775	0					1.4775	0
1.47833	0					1.47833	0					1.47833	0
1.47917	0					1.47917	0					1.47917	0
1.48	0					1.48	0					1.48	0
1.48083	0					1.48083	0					1.48083	0
1.48167	0					1.48167	0					1.48167	0
1.4825	0					1.4825	0					1.4825	0
1.48333	0					1.48333	0					1.48333	0
1.48417	0					1.48417	0					1.48417	0
1.485	0					1.485	0					1.485	0
1.48583	0					1.48583	0					1.48583	0
1.48667	0					1.48667	0					1.48667	0
1.4875	0					1.4875	0					1.4875	0
1.48833	0					1.48833	0					1.48833	0
1.48917	0					1.48917	0					1.48917	0
1.49	0					1.49	0					1.49	0
1.49083	0					1.49083	0					1.49083	0
1.49167	0					1.49167	0					1.49167	0
1.4925	0					1.4925	0					1.4925	0
1.49333	0					1.49333	0					1.49333	0
1.49417	0					1.49417	0					1.49417	0
1.495	0					1.495	0					1.495	0
1.49583	0					1.49583	0					1.49583	0
1.49667	0					1.49667	0					1.49667	0
1.4975	0					1.4975	0					1.4975	0
1.49833	0					1.49833	0					1.49833	0
1.49917	0					1.49917	0					1.49917	0
1.5	0					1.5	0					1.5	0
1.50083	0					1.50083	0					1.50083	0
1.50167	0					1.50167	0					1.50167	0
1.5025	0					1.5025	0					1.5025	0
1.50333	0					1.50333	0					1.50333	0
1.50417	0					1.50417	0					1.50417	0
1.505	0					1.505	0					1.505	0
1.50583	0					1.50583	0					1.50583	0
1.50667	0					1.50667	0					1.50667	0
1.5075	0					1.5075	0					1.5075	0
1.50833	0					1.50833	0					1.50833	0
1.50917	0					1.50917	0					1.50917	0
1.51	0					1.51	0					1.51	0
1.51083	0					1.51083	0					1.51083	0
1.51167	0					1.51167	0					1.51167	0
1.5125	0					1.5125	0					1.5125	0
1.51333	0					1.51333	0					1.51333	0
1.51417	0					1.51417	0					1.51417	0
1.515	0					1.515	0					1.515	0
1.51583	0					1.51583	0					1.51583	0
1.51667	0					1.51667	0					1.51667	0
1.5175	0					1.5175	0					1.5175	0
1.51833	0					1.51833	0					1.51833	0
1.51917	0					1.51917	0					1.51917	0
1.52	0					1.52	0					1.52	0
1.52083	0					1.52083	0					1.52083	0
1.52167	0					1.52167	0					1.52167	0
1.5225	0					1.5225	0					1.5225	0
1.52333	0					1.52333	0					1.52333	0
1.52417	0					1.52417	0					1.52417	0
1.525	0					1.525	0					1.525	0
1.52583	0					1.52583	0					1.52583	0
1.52667	0					1.52667	0					1.52667	0
1.5275	0					1.5275	0					1.5275	0
1.52833	0					1.52833	0					1.52833	0
1.52917	0					1.52917	0					1.52917	0
1.53	0					1.53	0					1.53	0
1.53083	0					1.53083	0					1.53083	0
1.53167	0					1.53167	0					1.53167	0
1.5325	0					1.5325	0					1.5325	0
1.53333	0					1.53333	0					1.53333	0
1.53417	0					1.53417	0					1.53417	0
1.535	0					1.535	0					1.535	0
1.53583	0					1.53583	0					1.53583	0
1.53667	0					1.53667	0					1.53667	0
1.5375	0					1.5375	0					1.5375	0
1.53833	0					1.53833	0					1.53833	0
1.53917	0					1.53917	0					1.53917	0
1.54	0					1.54	0					1.54	0
1.54083	0					1.54083	0					1.54083	0
1.54167	0					1.54167	0					1.54167	0
1.5425	0					1.5425	0					1.5425	0
1.54333	0					1.54333	0					1.54333	0
1.54417	0					1.54417	0					1.54417	0
1.545	0					1.545	0					1.545	0
1.54583	0					1.54583	0					1.54583	0
1.54667	0					1.54667	0					1.54667	0
1.5475	0					1.5475	0					1.5475	0
1.54833	0					1.54833	0					1.54833	0
1.54917	0					1.54917	0					1.54917	0
1.55	0					1.55	0					1.55	0
1.55083	0					1.55083	0					1.55083	0
1.55167	0					1.55167	0					1.55167	0
1.5525	0					1.5525	0					1.5525	0
1.55333	0					1.55333	0					1.55333	0
1.55417	0					1.55417	0					1.55417	0
1.555	0					1.555	0					1.555	0
1.55583	0					1.55583	0					1.55583	0
1.55667	0					1.55667	0					1.55667	0
1.5575	0					1.5575	0					1.5575	0
1.55833	0					1.55833	0					1.55833	0
1.55917	0					1.55917	0					1.55917	0
1.56	0					1.56	0					1.56	0
1.56083	0					1.56083	0					1.56083	0
1.56167	0					1.56167	0					1.56167	0
1.5625	0					1.5625	0					1.5625	0
1.56333	0					1.56333	0					1.56333	0
1.56417	0					1.56417	0					1.56417	0
1.565	0					1.565	0					1.565	0
1.56583	0					1.56583	0					1.56583	0
1.56667	0					1.56667	0					1.56667	0
1.5675	0					1.5675	0					1.5675	0
1.56833	0					1.56833	0					1.56833	0
1.56917	0					1.56917	0					1.56917	0
1.57	0					1.57	0					1.57	0
1.57083	0					1.57083	0					1.57083	0
1.57167	0					1.57167	0					1.57167	0
1.5725	0					1.5725	0					1.5725	0
1.57333	0					1.57333	0					1.57333	0
1.57417	0					1.57417	0					1.57417	0
1.575	0					1.575	0					1.575	0
1.57583	0					1.57583	0					1.57583	0
1.57667	0					1.57667	0					1.57667	0
1.5775	0					1.5775	0					1.5775	0
1.57833	0					1.57833	0					1.57833	0
1.57917	0					1.57917	0					1.57917	0
1.58	0					1.58	0					1.58	0
1.58083	0					1.58083	0					1.58083	0
1.58167	0					1.58167	0					1.58167	0
1.5825	0					1.5825	0					1.5825	0
1.58333	0					1.58333	0					1.58333	0
1.58417	0					1.58417	0					1.58417	0
1.585	0					1.585	0					1.585	0
1.58583	0					1.58583	0					1.58583	0
1.58667	0					1.58667	0					1.58667	0
1.5875	0					1.5875	0					1.5875	0
1.58833	0					1.58833	0					1.58833	0
1.58917	0					1.58917	0					1.58917	0
1.59	0					1.59	0					1.59	0
1.59083	0					1.59083	0					1.59083	0
1.59167	0					1.59167	0					1.59167	0
1.5925	0					1.5925	0					1.5925	0
1.59333	0					1.59333	0					1.59333	0
1.59417	0					1.59417	0					1.59417	0
1.595	0					1.595	0					1.595	0
1.59583	0					1.59583	0					1.59583	0
1.59667	0					1.59667	0					1.59667	0
1.5975	0					1.5975	0					1.5975	0
1.59833	0					1.59833	0					1.59833	0
1.59917	0					1.59917	0					1.59917	0
1.6	0					1.6	0					1.6	0
1.60083	0					1.60083	0					1.60083	0
1.60167	0					1.60167	0					1.60167	0
1.6025	0					1.6025	0					1.6025	0
1.60333	0					1.60333	0					1.60333	0
1.60417	0					1.60417	0					1.60417	0
1.605	0					1.605	0					1.605	0
1.60583	0					1.60583	0					1.60583	0
1.60667	0					1.60667	0					1.60667	0
1.6075	0					1.6075	0					1.6075	0
1.60833	0					1.60833	0					1.60833	0
1.60917	0					1.60917	0					1.60917	0
1.61	0					1.61	0					1.61	0
1.61083	0					1.61083	0					1.61083	0
1.61167	0					1.61167	0					1.61167	0
1.6125	0					1.6125	0					1.6125	0
1.61333	0					1.61333	0					1.61333	0
1.61417	0					1.61417	0					1.61417	0
1.615	0					1.615	0					1.615	0
1.61583	0					1.61583	0					1.61583	0
1.61667	0					1.61667	0					1.61667	0
1.6175	0					1.6175	0					1.6175	0
1.61833	0					1.61833	0					1.61833	0
1.61917	0					1.61917	0					1.61917	0
1.62	0					1.62	0					1.62	0
1.62083	0					1.62083	0					1.62083	0
1.62167	0					1.62167	0					1.62167	0
1.6225	0					1.6225	0					1.6225	0
1.62333	0					1.62333	0					1.62333	0
1.62417	0					1.62417	0					1.62417	0
1.625	0					1.625	0					1.625	0
1.62583	0					1.62583	0					1.62583	0
1.62667	0					1.62667	0					1.62667	0
1.6275	0					1.6275	0					1.6275	0
1.62833	0					1.62833	0					1.62833	0
1.62917	0					1.62917	0					1.62917	0
1.63	0					1.63	0					1.63	0
1.63083	0					1.63083	0					1.63083	0
1.63167	0					1.63167	0					1.63167	0
1.6325	0					1.6325	0					1.6325	0
1.63333	0					1.63333	0					1.63333	0
1.63417	0					1.63417	0					1.63417	0
1.635	0					1.635	0					1.635	0
1.63583	0					1.63583	0					1.63583	0
1.63667	0					1.63667	0					1.63667	0
1.6375	0					1.6375	0					1.6375	0
1.63833	0					1.63833	0					1.63833	0
1.63917	0					1.63917	0					1.63917	0
1.64	0					1.64	0					1.64	0
1.64083	0					1.64083	0					1.64083	0
1.64167	0					1.64167	0					1.64167	0
1.6425	0					1.6425	0					1.6425	0
1.64333	0					1.64333	0					1.64333	0
1.64417	0					1.64417	0					1.64417	0
1.645	0					1.645	0					1.645	0
1.64583	0					1.64583	0					1.64583	0
1.64667	0					1.64667	0					1.64667	0
1.6475	0					1.6475	0					1.6475	0
1.64833	0					1.64833	0					1.64833	0
1.64917	0					1.64917	0					1.64917	0
1.65	0					1.65	0					1.65	0
1.65083	0					1.65083	0					1.65083	0
1.65167	0					1.65167	0					1.65167	0
1.6525	0					1.6525	0					1.6525	0
1.65333	0					1.65333	0					1.65333	0
1.65417	0					1.65417	0					1.65417	0
1.655	0					1.655	0					1.655	0
1.65583	0					1.65583	0					1.65583	0
1.65667	0					1.65667	0					1.65667	0
1.6575	0					1.6575	0					1.6575	0
1.65833	0					1.65833	0					1.65833	0
1.65917	0					1.65917	0					1.65917	0
1.66	0					1.66	0					1.66	0
1.66083	0					1.66083	0					1.66083	0
1.66167	0					1.66167	0					1.66167	0
1.6625	0					1.6625	0					1.6625	0
1.66333	0					1.66333	0					1.66333	0
1.66417	0					1.66417	0					1.66417	0
[truncated: 22,818 more rows]

## Sheet: AFM
TiO2	DOPA	DOPA-P1	DOPA-P2	DOPA-P1@P2
3.05	5.85	7.82	8.47	8.34
2.33	5.02	8.42	9.21	9.03
2.43	6.22	8.68	8.27	9.02

## Sheet: CA
TiO2	DOPA	DOPA-P1	DOPA-P2	DOPA-P1@P2
81.1	67.2	56.7	56.7	55.6
84.4	62.5	61.3	55.1	54.2
77.7	70.3	55.8	59.3	60.2

## Sheet: 1H-NMR
-0.2323	1.55675
-0.232071	1.48472
-0.231842	1.41269
-0.231612	1.34065
-0.231383	1.26862
-0.231154	1.32465
-0.230925	1.38067
-0.230696	1.4367
-0.230466	1.49272
-0.230237	1.61118
-0.230008	1.72963
-0.229779	1.84809
-0.22955	1.96654
-0.22932	1.91532
-0.229091	1.86409
-0.228862	1.81287
-0.228633	1.76165
-0.228404	1.65315
-0.228174	1.54465
-0.227945	1.58982
-0.227716	1.63499
-0.227487	1.7762
-0.227258	1.91742
-0.227028	1.75129
-0.226799	1.58517
-0.22657	1.48787
-0.226341	1.39058
-0.226112	1.44695
-0.225882	1.50333
-0.225653	1.56291
-0.225424	1.62248
-0.225195	1.68206
-0.224966	1.74164
-0.224736	1.89686
-0.224507	2.05208
-0.224278	1.89996
-0.224049	1.74784
-0.22382	1.68216
-0.22359	1.61648
-0.223361	1.70447
-0.223132	1.79246
-0.222903	1.82763
-0.222674	1.86279
-0.222444	1.994
-0.222215	1.97154
-0.221986	1.9747
-0.221757	2.13152
-0.221528	2.33636
-0.221298	2.28509
-0.221069	1.91212
-0.22084	1.53915
-0.220611	1.6624
-0.220382	1.78566
-0.220152	1.98255
-0.219923	2.17944
-0.219694	2.28029
-0.219465	2.02257
-0.219236	1.56316
-0.219006	1.25742
-0.218777	1.34546
-0.218548	1.4335
-0.218319	1.28143
-0.21809	0.975686
-0.21786	0.910056
-0.217631	1.10054
-0.217402	1.24681
-0.217173	1.23941
-0.216944	1.33445
-0.216714	1.42949
-0.216485	1.45731
-0.216256	1.48512
-0.216027	1.51293
-0.215798	1.54075
-0.215568	1.6662
-0.215339	1.79166
-0.21511	1.90111
-0.214881	2.01056
-0.214652	2.19685
-0.214422	2.12702
-0.214193	1.80747
-0.213964	1.64159
-0.213735	1.95839
-0.213506	2.27518
-0.213276	2.29424
-0.213047	2.3133
-0.212818	2.43161
-0.212589	2.54991
-0.21236	2.52095
-0.21213	2.23587
-0.211901	1.82753
-0.211672	1.67531
-0.211443	1.67036
-0.211214	1.6654
-0.210984	1.71167
-0.210755	1.75795
-0.210526	1.95789
-0.210297	2.15783
-0.210068	2.2091
-0.209838	2.26038
-0.209609	2.02032
-0.20938	1.78026
-0.209151	1.62984
-0.208922	1.73554
-0.208692	1.93728
-0.208463	1.98535
-0.208234	1.95819
-0.208005	1.93103
-0.207776	2.18559
-0.207546	2.44016
-0.207317	2.47062
-0.207088	2.24497
-0.206859	1.93288
-0.20663	1.77445
-0.2064	1.90566
-0.206171	2.19054
-0.205942	2.25132
-0.205713	2.05598
-0.205484	1.81902
-0.205254	1.83818
-0.205025	1.85094
-0.204796	1.60758
-0.204567	1.31459
-0.204338	1.17528
-0.204108	1.44575
-0.203879	1.71623
-0.20365	1.87145
-0.203421	2.02667
-0.203192	2.02822
-0.202962	2.02977
-0.202733	1.96689
-0.202504	1.90401
-0.202275	1.84113
-0.202046	1.77826
-0.201816	1.83383
-0.201587	1.88941
-0.201358	1.94498
-0.201129	2.00056
-0.2009	1.9905
-0.20067	1.98045
-0.200441	1.97039
-0.200212	1.96034
-0.199983	1.87345
-0.199754	1.78656
-0.199524	1.69967
-0.199295	1.61278
-0.199066	1.53399
-0.198837	1.45521
-0.198607	1.37642
-0.198378	1.29763
-0.198149	1.29568
-0.19792	1.29373
-0.197691	1.30139
-0.197461	1.30904
-0.197232	1.52639
-0.197003	1.89741
-0.196774	2.34527
-0.196545	2.48578
-0.196315	2.34136
-0.196086	2.04328
-0.195857	1.96609
-0.195628	1.88891
-0.195399	1.62083
-0.195169	1.35276
-0.19494	1.20954
-0.194711	1.37367
-0.194482	1.51859
-0.194253	1.50983
-0.194023	1.60673
-0.193794	1.70362
-0.193565	1.83733
-0.193336	1.97104
-0.193107	2.17199
-0.192877	2.21926
-0.192648	2.05843
-0.192419	1.59027
-0.19219	1.1125
-0.191961	0.942071
-0.191731	1.03296
-0.191502	1.12385
-0.191273	1.23396
-0.191044	1.34406
-0.190815	1.27487
-0.190585	1.20569
-0.190356	1.13651
-0.190127	1.06733
-0.189898	1.17263
-0.189669	1.27793
-0.189439	1.38322
-0.18921	1.48852
-0.188981	1.79551
-0.188752	2.1025
-0.188523	2.00291
-0.188293	1.74964
-0.188064	1.68546
-0.187835	1.92862
-0.187606	2.07574
-0.187377	2.06919
-0.187147	2.05943
-0.186918	2.04968
-0.186689	2.03032
-0.18646	2.01096
-0.186231	1.9756
-0.186001	1.94023
-0.185772	1.90486
-0.185543	1.8695
-0.185314	1.90456
-0.185085	1.93963
-0.184855	1.85944
-0.184626	1.47191
-0.184397	1.05417
-0.184168	0.943771
-0.183939	1.35841
-0.183709	1.77305
-0.18348	1.87075
-0.183251	1.96844
-0.183022	1.91247
-0.182793	1.85649
-0.182563	1.85654
-0.182334	1.85659
-0.182105	1.85664
-0.181876	1.85669
-0.181647	1.82793
-0.181417	1.79916
-0.181188	1.7704
-0.180959	1.74164
-0.18073	1.93178
-0.180501	2.12191
-0.180271	2.00471
-0.180042	1.88751
-0.179813	1.78951
-0.179584	1.69152
-0.179355	1.74719
-0.179125	1.80287
-0.178896	1.83293
-0.178667	1.86299
-0.178438	2.04673
-0.178209	2.23046
-0.177979	2.23812
-0.17775	2.24577
-0.177521	1.96529
-0.177292	1.68481
-0.177063	1.57531
-0.176833	1.77315
-0.176604	2.12466
-0.176375	2.16883
-0.176146	2.00811
-0.175917	1.84739
-0.175687	1.9748
-0.175458	2.1022
-0.175229	1.99911
-0.175	1.89601
-0.174771	1.94658
-0.174541	1.99716
-0.174312	1.9805
-0.174083	1.96384
-0.173854	1.94718
-0.173625	1.93053
-0.173395	1.90796
-0.173166	1.8854
-0.172937	1.86284
-0.172708	1.84028
-0.172479	1.68966
-0.172249	1.53905
-0.17202	1.38843
-0.171791	1.23781
-0.171562	1.37532
-0.171333	1.51283
-0.171103	1.65035
-0.170874	1.78786
-0.170645	1.74609
-0.170416	1.70432
-0.170187	1.66255
-0.169957	1.62078
-0.169728	1.66155
-0.169499	1.70232
-0.16927	1.74309
-0.169041	1.78386
-0.168811	1.61653
-0.168582	1.4492
-0.168353	1.29788
-0.168124	1.14656
-0.167895	0.905604
-0.167665	0.920761
-0.167436	1.15042
-0.167207	1.38007
-0.166978	1.43365
-0.166749	1.48722
-0.166519	1.5408
-0.16629	1.59437
-0.166061	1.62223
-0.165832	1.6501
-0.165603	1.83163
-0.165373	2.01316
-0.165144	1.9738
-0.164915	1.93443
-0.164686	2.13517
-0.164457	2.33591
-0.164227	2.26133
-0.163998	1.93063
-0.163769	1.75359
-0.16354	1.83268
-0.163311	2.02062
-0.163081	2.20855
-0.162852	2.15638
-0.162623	2.10421
-0.162394	2.12767
-0.162165	2.15113
-0.161935	2.4147
-0.161706	2.67827
-0.161477	2.67612
-0.161248	2.41785
-0.161019	2.29724
-0.160789	2.43276
-0.16056	2.55386
-0.160331	2.41885
-0.160102	2.29024
-0.159873	2.41775
-0.159643	2.48123
-0.159414	2.39104
-0.159185	2.40329
-0.158956	2.41555
-0.158727	2.34977
-0.158497	2.28399
-0.158268	2.21821
-0.158039	2.15243
-0.15781	1.95859
-0.157581	1.76475
-0.157351	1.57091
-0.157122	1.37707
-0.156893	1.51298
-0.156664	1.6489
-0.156435	1.7752
-0.156205	1.90151
-0.155976	2.04703
-0.155747	2.03888
-0.155518	2.01471
-0.155289	2.14422
-0.155059	2.2007
-0.15483	2.00106
-0.154601	1.86865
-0.154372	1.88991
-0.154143	1.78631
-0.153913	1.68271
-0.153684	1.58872
-0.153455	1.49472
-0.153226	1.64564
-0.152997	1.79656
-0.152767	1.60493
-0.152538	1.41329
-0.152309	1.40733
-0.15208	1.6575
-0.151851	1.90126
-0.151621	2.14502
-0.151392	2.17189
-0.151163	1.94263
-0.150934	1.61733
-0.150705	1.29203
-0.150475	1.28688
-0.150246	1.53784
-0.150017	1.87845
-0.149788	2.21906
-0.149559	2.1947
-0.149329	1.81177
-0.1491	1.30399
-0.148871	0.949874
-0.148642	0.979938
-0.148413	1.26612
-0.148183	1.50428
-0.147954	1.58877
-0.147725	1.58151
-0.147496	1.57426
-0.147267	1.5574
-0.147037	1.54055
-0.146808	1.49808
-0.146579	1.45561
-0.14635	1.56681
-0.146121	1.67801
-0.145891	1.89486
-0.145662	2.11171
-0.145433	2.07244
-0.145204	2.03317
-0.144975	1.99711
-0.144745	1.96104
-0.144516	1.92497
-0.144287	1.88891
-0.144058	2.02252
-0.143829	2.15613
-0.143599	1.93118
-0.14337	1.70622
-0.143141	1.7598
-0.142912	1.81337
-0.142683	1.86695
-0.142453	1.92052
-0.142224	1.94208
-0.141995	1.96364
-0.141766	1.9852
-0.141537	2.00676
-0.141307	1.84904
-0.141078	1.69132
-0.140849	1.53359
-0.14062	1.37587
-0.140391	1.39453
-0.140161	1.41319
-0.139932	1.43185
-0.139703	1.4505
-0.139474	1.67726
-0.139245	1.90401
-0.139015	2.11476
-0.138786	2.32551
-0.138557	2.45942
-0.138328	2.33721
-0.138099	2.00051
-0.137869	1.6638
-0.13764	1.58962
-0.137411	1.51543
-0.137182	1.44125
-0.136953	1.36707
-0.136723	1.5426
-0.136494	1.71813
-0.136265	1.89366
-0.136036	2.06919
-0.135807	2.04303
-0.135577	2.01686
-0.135348	1.9907
-0.135119	1.96454
-0.13489	2.12406
-0.13466	2.28359
-0.134431	2.22861
-0.134202	1.91752
-0.133973	1.65445
-0.133744	1.39138
-0.133514	1.31719
-0.133285	1.49913
-0.133056	1.7772
-0.132827	1.90161
-0.132598	1.67386
-0.132368	1.29243
-0.132139	1.19594
-0.13191	1.45801
-0.131681	1.72008
-0.131452	1.62358
-0.131222	1.44545
-0.130993	1.42099
-0.130764	1.5438
-0.130535	1.6666
-0.130306	1.56851
-0.130076	1.47041
-0.129847	1.52599
-0.129618	1.58156
-0.129389	1.68636
-0.12916	1.79116
-0.12893	1.88635
-0.128701	1.98155
-0.128472	1.9871
-0.128243	1.83898
-0.128014	1.62363
-0.127784	1.6644
-0.127555	1.87645
-0.127326	1.93483
-0.127097	1.74669
-0.126868	1.55855
-0.126638	1.68096
-0.126409	1.95704
-0.12618	2.04423
-0.125951	1.8753
-0.125722	1.67356
-0.125492	1.62548
-0.125263	1.58382
-0.125034	1.38848
-0.124805	1.28918
-0.124576	1.54845
-0.124346	2.12787
-0.124117	2.55361
-0.123888	2.60959
-0.123659	2.40945
-0.12343	2.34377
-0.1232	2.27809
-0.122971	2.1996
-0.122742	2.12111
-0.122513	1.88896
-0.122284	1.6568
-0.122054	1.53429
-0.121825	1.41179
-0.121596	1.5454
-0.121367	1.67901
-0.121138	1.66855
-0.120908	1.6581
-0.120679	1.64765
-0.12045	1.63719
-0.120221	1.61873
-0.119992	1.60027
-0.119762	1.73549
-0.119533	1.8707
-0.119304	2.24282
-0.119075	2.61494
-0.118846	2.64771
-0.118616	2.32191
-0.118387	1.8686
-0.118158	1.77385
-0.117929	1.90641
-0.1177	2.03898
-0.11747	1.83538
-0.117241	1.47812
-0.117012	1.26172
-0.116783	1.40388
-0.116554	1.91742
-0.116324	2.43096
-0.116095	2.70758
-0.115866	2.62564
-0.115637	2.39644
-0.115408	2.16723
-0.115178	1.93163
-0.114949	1.69602
-0.11472	1.41079
-0.114491	1.38167
-0.114262	1.46461
-0.114032	1.54755
-0.113803	1.41599
-0.113574	1.28443
-0.113345	1.40899
-0.113116	1.68721
-0.112886	1.89021
-0.112657	1.83708
-0.112428	1.59507
-0.112199	1.35306
-0.11197	1.19749
-0.11174	1.29803
-0.111511	1.69632
-0.111282	2.0946
-0.111053	2.212
-0.110824	2.02207
-0.110594	1.91857
-0.110365	1.96874
-0.110136	2.09575
-0.109907	2.22276
-0.109678	2.24412
-0.109448	1.95814
-0.109219	1.74739
-0.10899	1.84399
-0.108761	1.83493
-0.108532	1.67221
-0.108302	1.64074
-0.108073	1.60928
-0.107844	1.56821
-0.107615	1.52714
-0.107386	1.25977
-0.107156	0.992394
-0.106927	1.23726
-0.106698	1.78946
-0.106469	2.07274
-0.10624	1.84379
-0.10601	1.73969
-0.105781	1.94293
-0.105552	2.14457
-0.105323	2.19255
-0.105094	2.34617
-0.104864	2.49979
-0.104635	2.6438
-0.104406	2.78782
-0.104177	2.93184
-0.103948	3.07585
-0.103718	2.97375
-0.103489	2.87166
-0.10326	2.76956
-0.103031	2.66746
-0.102802	2.74465
-0.102572	2.82184
-0.102343	2.89902
-0.102114	2.97621
-0.101885	2.95255
-0.101656	2.92888
-0.101426	2.90522
-0.101197	2.88156
-0.100968	2.8579
-0.100739	2.83424
-0.10051	2.81058
-0.10028	2.78692
-0.100051	2.77346
-0.099822	2.76001
-0.0995928	2.74655
-0.0993636	2.73309
-0.0991344	2.71964
-0.0989052	2.70618
-0.098676	2.68312
-0.0984468	2.66006
-0.0982176	2.38568
-0.0979884	1.95764
-0.0977592	1.45276
-0.09753	1.25521
-0.0973008	1.3266
-0.0970716	1.55165
-0.0968424	1.70947
-0.0966132	1.8673
-0.096384	1.84989
-0.0961548	1.83248
-0.0959256	1.81507
-0.0956964	1.79766
-0.0954672	1.78026
-0.095238	1.76285
-0.0950088	1.74544
-0.0947796	1.72803
-0.0945504	1.84349
-0.0943212	1.95894
-0.094092	2.07439
-0.0938628	2.18984
-0.0936336	2.02357
-0.0934044	1.85729
-0.0931752	1.69102
-0.092946	1.52474
-0.0927168	1.74864
-0.0924876	1.97254
-0.0922584	2.18684
-0.0920292	2.40114
-0.0918	2.35932
-0.0915708	2.16383
-0.0913416	2.25647
-0.0911124	2.50279
-0.0908832	2.41615
-0.090654	2.02217
-0.0904248	1.63779
-0.0901956	1.56076
-0.0899664	1.71423
-0.0897372	1.8677
-0.089508	1.73303
-0.0892788	1.59837
-0.0890496	1.5601
-0.0888204	1.52184
-0.0885912	1.48357
-0.088362	1.4453
-0.0881328	1.46466
-0.0879036	1.48402
-0.0876743	1.50338
-0.0874451	1.52274
-0.0872159	1.52289
-0.0869867	1.52304
-0.0867575	1.52319
-0.0865283	1.52334
-0.0862991	1.68356
-0.0860699	1.84379
-0.0858407	2.00401
-0.0856115	2.16423
-0.0853823	2.02672
-0.0851531	1.88921
-0.0849239	1.47637
-0.0846947	1.06353
-0.0844655	1.03486
-0.0842363	1.51844
-0.0840071	2.17489
-0.0837779	2.524
-0.0835487	2.56257
-0.0833195	2.29379
-0.0830903	1.99621
-0.0828611	2.00596
-0.0826319	2.00611
-0.0824027	1.85259
-0.0821735	1.80472
-0.0819443	1.75685
-0.0817151	1.78956
-0.0814859	1.82228
-0.0812567	1.85499
-0.0810275	1.88771
-0.0807983	1.93323
-0.0805691	1.97875
-0.0803399	1.71693
-0.0801107	1.45511
-0.0798815	1.70552
-0.0796523	1.95594
-0.0794231	1.89901
-0.0791939	1.53474
-0.0789647	1.433
-0.0787355	1.84349
-0.0785063	2.11951
-0.0782771	2.0882
-0.0780479	1.95324
-0.0778187	1.81827
-0.0775895	1.68331
-0.0773603	1.54835
-0.0771311	1.24691
-0.0769019	1.25281
-0.0766727	1.39318
-0.0764435	1.53354
-0.0762143	1.59067
-0.0759851	1.6478
-0.0757559	1.70492
-0.0755267	1.76205
-0.0752975	1.53104
-0.0750683	1.30004
-0.0748391	1.58126
-0.0746099	1.86249
-0.0743807	2.01411
-0.0741515	2.16573
-0.0739223	2.18289
-0.0736931	1.89271
-0.0734639	1.57691
-0.0732347	1.26112
-0.0730055	1.62403
-0.0727763	1.98695
-0.0725471	2.15618
-0.0723179	2.01807
-0.0720887	2.03362
-0.0718595	2.04918
-0.0716303	2.25042
-0.0714011	2.14432
-0.0711719	2.01902
-0.0709427	2.20105
-0.0707135	2.61319
-0.0704843	2.71799
-0.0702551	2.50264
-0.0700259	2.28729
-0.0697967	2.18079
-0.0695675	2.07429
-0.0693383	1.96779
-0.0691091	1.86129
-0.0688799	1.65395
-0.0686507	1.4466
-0.0684215	1.5466
-0.0681923	1.64659
-0.0679631	1.65055
-0.0677339	1.6545
-0.0675047	1.65845
-0.0672755	1.6624
-0.0670463	1.70152
-0.0668171	1.74064
-0.0665879	1.77976
-0.0663587	1.81887
-0.0661295	1.93483
-0.0659003	2.05078
-0.0656711	2.16673
-0.0654419	2.28269
-0.0652127	2.18094
-0.0649835	2.07919
-0.0647543	1.97745
-0.0645251	1.8757
-0.0642959	1.85079
-0.0640667	1.82588
-0.0638375	1.80097
-0.0636083	1.77605
-0.0633791	1.93803
-0.0631499	2.1
-0.0629207	2.24277
-0.0626915	2.38553
-0.0624623	2.69478
-0.0622331	2.69668
-0.0620039	2.56412
-0.0617747	2.43156
-0.0615455	2.47187
-0.0613163	2.51219
-0.0610871	2.55251
-0.0608579	2.59283
-0.0606287	2.61394
-0.0603995	2.63505
-0.0601703	2.63695
-0.0599411	2.63885
-0.0597119	2.73555
-0.0594827	2.5249
-0.0592535	2.29504
-0.0590243	2.37253
-0.0587951	2.43081
-0.0585659	2.18174
-0.0583367	2.12476
-0.0581075	2.06779
-0.0578783	2.18049
-0.0576491	2.29319
-0.0574199	2.40589
-0.0571907	2.5186
-0.0569615	2.40079
-0.0567323	2.28299
-0.0565031	2.16518
-0.0562739	2.04738
-0.0560447	1.99721
-0.0558154	1.94703
-0.0555862	1.89686
-0.055357	1.84669
-0.0551278	2.04623
-0.0548986	2.24577
-0.0546694	2.13797
-0.0544402	2.03017
-0.054211	2.10646
-0.0539818	2.18274
-0.0537526	2.25903
-0.0535234	2.33531
-0.0532942	2.418
-0.053065	2.50069
-0.0528358	2.28564
-0.0526066	2.07059
-0.0523774	2.22136
-0.0521482	2.5258
-0.051919	2.61894
-0.0516898	2.40474
-0.0514606	2.13932
-0.0512314	2.02757
-0.0510022	2.13032
-0.050773	2.54041
-0.0505438	2.82404
-0.0503146	2.80032
-0.0500854	2.46607
-0.0498562	2.13182
-0.049627	1.95764
-0.0493978	1.93713
-0.0491686	1.92622
-0.0489394	1.76165
-0.0487102	1.60908
-0.048481	1.61018
-0.0482518	1.82258
-0.0480226	2.34231
-0.0477934	2.76601
-0.0475642	2.67747
-0.047335	2.29759
-0.0471058	2.07139
-0.0468766	2.18134
-0.0466474	2.29129
-0.0464182	2.41085
-0.046189	2.5304
-0.0459598	2.71399
-0.0457306	2.89757
-0.0455014	2.9563
-0.0452722	2.70768
-0.045043	2.4277
-0.0448138	2.3014
-0.0445846	2.37678
-0.0443554	2.45217
-0.0441262	2.646
-0.043897	2.83984
-0.0436678	2.72634
-0.0434386	2.61284
-0.0432094	2.48333
-0.0429802	2.35382
-0.042751	2.24352
-0.0425218	2.13322
-0.0422926	1.97169
-0.0420634	2.11751
-0.0418342	2.27293
-0.041605	2.12101
-0.0413758	1.7622
-0.0411466	1.55705
-0.0409174	1.66245
-0.0406882	1.92152
-0.040459	2.03012
-0.0402298	1.98505
-0.0400006	1.85354
-0.0397714	2.02937
-0.0395422	2.38448
-0.039313	2.58593
-0.0390838	2.58568
-0.0388546	2.58543
-0.0386254	2.53715
-0.0383962	2.48888
-0.038167	2.44061
-0.0379378	2.39234
-0.0377086	2.69283
-0.0374794	2.99331
-0.0372502	2.97365
-0.037021	2.64665
-0.0367918	2.36768
-0.0365626	2.39604
-0.0363334	2.33796
-0.0361042	2.12621
-0.035875	2.06814
-0.0356458	2.3174
-0.0354166	2.57627
-0.0351874	2.5278
-0.0349582	2.25843
-0.034729	2.29639
-0.0344998	2.53605
-0.0342706	2.62204
-0.0340414	2.39069
-0.0338122	2.15933
-0.033583	2.22571
-0.0333538	2.29209
-0.0331246	2.38408
-0.0328954	2.47608
-0.0326662	2.56807
-0.032437	2.66006
-0.0322078	2.56957
-0.0319786	2.47908
-0.0317494	2.21571
-0.0315202	2.25968
-0.031291	2.52775
-0.0310618	2.79582
-0.0308326	2.76296
-0.0306034	2.42275
-0.0303742	2.27548
-0.030145	2.43556
-0.0299158	2.59563
-0.0296866	2.44836
-0.0294574	2.17944
-0.0292282	2.21786
-0.028999	2.55721
-0.0287698	2.89657
-0.0285406	2.79092
-0.0283114	2.37793
-0.0280822	2.05138
-0.027853	1.8785
-0.0276238	1.91372
-0.0273946	1.94893
-0.0271654	1.99375
-0.0269362	2.03857
-0.026707	2.13422
-0.0264778	2.22986
-0.0262486	2.32551
-0.0260194	2.42115
-0.0257902	2.3183
-0.025561	2.21546
-0.0253318	2.11261
-0.0251026	2.00976
-0.0248734	1.89411
-0.0246442	1.77846
-0.024415	1.98295
-0.0241857	2.49478
-0.0239565	2.92978
-0.0237273	3.05744
-0.0234981	2.86495
-0.0232689	2.67247
-0.0230397	2.62905
-0.0228105	2.58563
-0.0225813	2.54221
-0.0223521	2.49879
-0.0221229	2.50019
-0.0218937	2.50159
-0.0216645	2.50299
-0.0214353	2.50439
-0.0212061	2.43696
-0.0209769	2.36953
-0.0207477	2.3021
-0.0205185	2.23466
-0.0202893	2.44896
-0.0200601	2.66326
-0.0198309	2.87756
-0.0196017	3.09186
-0.0193725	3.11287
-0.0191433	3.13388
-0.0189141	3.15489
-0.0186849	3.1759
-0.0184557	3.19691
-0.0182265	3.21792
-0.0179973	3.23893
-0.0177681	3.25994
-0.0175389	3.21211
-0.0173097	3.16429
-0.0170805	3.11647
-0.0168513	3.06865
-0.0166221	3.20011
-0.0163929	3.33157
-0.0161637	3.46303
-0.0159345	3.59449
-0.0157053	3.50445
-0.0154761	3.41441
-0.0152469	3.32437
-0.0150177	3.23432
-0.0147885	3.394
-0.0145593	3.55367
-0.0143301	3.406
-0.0141009	3.25834
-0.0138717	3.57648
-0.0136425	3.89463
-0.0134133	4.21277
-0.0131841	4.53092
-0.0129549	4.30482
-0.0127257	4.07871
-0.0124965	4.15995
-0.0122673	4.24119
-0.0120381	4.56534
-0.0118089	4.88949
-0.0115797	4.90629
-0.0113505	4.9231
-0.0111213	4.95912
-0.0108921	4.99513
-0.0106629	5.33849
-0.0104337	5.68185
-0.0102045	6.11965
-0.00997531	6.55745
-0.0097461	6.99525
-0.0095169	7.43305
-0.0092877	8.42791
-0.0090585	9.42277
-0.0088293	10.4176
-0.0086001	11.4125
-0.0083709	11.9587
-0.0081417	12.505
-0.0079125	13.0512
-0.0076833	13.5975
-0.0074541	14.6688
-0.0072249	15.7401
-0.0069957	16.3311
-0.0067665	16.9222
-0.00653729	17.5709
-0.00630809	18.7318
-0.00607889	20.3986
-0.00584969	22.3727
-0.00562049	24.8335
-0.00539129	28.0113
-0.00516209	32.0472
-0.00493289	37.2099
-0.00470369	44.1311
-0.00447449	53.2037
-0.00424529	64.7734
-0.00401609	79.1092
-0.00378689	96.3263
-0.00355769	116.31
-0.00332848	137.496
-0.00309928	157.147
-0.00287008	173.451
-0.00264088	186.17
-0.00241168	195.765
-0.00218248	202.593
-0.00195328	206.694
-0.00172408	208.438
-0.00149488	207.954
-0.00126568	204.09
-0.00103648	195.442
-0.000807276	182.594
-0.000578076	166.992
-0.000348875	150.059
-0.000119674	132.114
0.000109526	113.861
0.000338727	96.6464
0.000567928	81.7876
0.000797129	69.3908
0.00102633	58.9404
0.00125553	50.5134
0.00148473	44.0329
0.00171393	39.1787
0.00194313	35.4514
0.00217233	32.2748
0.00240153	29.6104
0.00263073	27.4791
0.00285994	25.6551
0.00308914	24.1193
0.00331834	23.0957
0.00354754	22.2449
0.00377674	21.3942
0.00400594	20.2681
0.00423514	19.142
0.00446434	18.0704
0.00469354	16.9988
0.00492274	15.9271
0.00515194	14.8555
0.00538114	13.9759
0.00561034	13.0964
0.00583954	12.5241
0.00606875	11.9519
0.00629795	11.3857
0.00652715	10.8195
0.00675635	10.0804
0.00698555	9.64867
0.00721475	9.24254
0.00744395	8.8364
0.00767315	8.27659
0.00790235	8.02413
0.00813155	8.04058
0.00836075	8.05704
0.00858995	7.78537
0.00881915	7.51369
0.00904835	7.33806
0.00927756	7.16243
0.00950676	6.9868
0.00973596	6.81117
0.00996516	6.67836
0.0101944	6.54555
0.0104236	6.41274
0.0106528	6.27992
0.010882	6.3264
0.0111112	6.37287
0.0113404	6.40013
0.0115696	6.42739
0.0117988	6.22415
0.012028	5.71356
0.0122572	5.20298
0.0124864	4.99974
0.0127156	4.93736
0.0129448	4.87498
0.013174	4.83181
0.0134032	4.78864
0.0136324	4.74157
0.0138616	4.6945
0.0140908	4.64742
0.01432	4.60035
0.0145492	4.85422
0.0147784	5.10809
0.0150076	5.05461
0.0152368	5.00114
0.015466	4.8164
0.0156952	4.63167
0.0159244	4.44693
0.0161536	4.2622
0.0163828	4.28876
0.016612	4.31532
0.0168412	4.34188
0.0170704	4.36845
0.0172996	4.40861
0.0175288	4.44878
0.017758	4.29686
0.0179872	4.45228
0.0182164	4.70375
0.0184456	4.64787
0.0186748	4.47675
0.018904	4.30562
0.0191332	4.23213
0.0193624	4.15865
0.0195916	4.08517
0.0198208	4.01168
0.02005	4.09187
0.0202792	4.17206
0.0205084	3.9449
0.0207376	3.71775
0.0209668	3.57413
0.021196	3.43051
0.0214252	3.2869
0.0216544	3.14328
0.0218836	3.23017
0.0221128	3.31706
0.022342	3.30151
0.0225712	2.97861
0.0228004	2.73094
0.0230296	2.99551
0.0232588	3.26009
0.023488	3.52466
0.0237172	3.5011
0.0239464	3.47754
0.0241756	3.45398
0.0244048	3.43041
0.024634	3.49289
0.0248632	3.55537
0.0250924	3.61785
0.0253216	3.68033
0.0255508	3.61475
0.02578	3.54917
0.0260092	3.48359
0.0262384	3.41801
0.0264676	3.39085
0.0266968	3.36368
0.026926	3.5094
0.0271552	3.34778
0.0273844	3.02608
0.0276136	2.70438
0.0278428	2.67082
0.028072	2.63725
0.0283012	2.62655
0.0285304	2.61584
0.0287596	2.91248
0.0289888	3.20911
0.029218	3.31366
0.0294472	3.41821
0.0296764	3.21542
0.0299056	3.01262
0.0301348	3.00192
0.030364	2.99121
0.0305932	3.28785
0.0308224	3.58449
0.0310516	3.42651
0.0312808	3.26854
0.03151	3.11057
0.0317392	2.9526
0.0319684	2.71619
0.0321976	2.47978
0.0324268	2.5315
0.032656	2.58323
0.0328852	2.55811
0.0331144	2.22566
0.0333436	1.89321
0.0335728	1.8681
0.033802	2.15993
0.0340312	2.45177
0.0342604	2.62835
0.0344896	2.49759
0.0347188	2.41165
0.034948	2.32571
0.0351772	2.5279
0.0354064	2.73009
0.0356356	2.78477
0.0358648	2.83944
0.036094	2.87491
0.0363232	2.91038
0.0365524	2.80498
0.0367816	2.39224
0.0370108	1.9795
0.03724	1.8741
0.0374692	2.04563
0.0376984	2.21716
0.0379276	2.10055
0.0381568	1.98395
0.038386	1.9762
0.0386152	1.96844
0.0388444	2.24882
0.0390736	2.5292
0.0393028	2.79837
0.0395321	2.76021
0.0397613	2.58758
0.0399905	2.41495
0.0402197	2.4152
0.0404489	2.41545
0.0406781	2.4157
0.0409073	2.41595
0.0411365	2.48023
0.0413657	2.54451
0.0415949	2.60879
0.0418241	2.67307
0.0420533	2.73735
0.0422825	2.80163
0.0425117	2.86591
0.0427409	2.93018
0.0429701	2.81368
0.0431993	2.69718
0.0434285	2.58067
0.0436577	2.46417
0.0438869	2.46292
0.0441161	2.46167
0.0443453	2.17229
0.0445745	1.8829
0.0448037	1.91687
0.0450329	2.25818
0.0452621	2.70193
0.0454913	3.14568
0.0457205	3.31411
0.0459497	2.9703
0.0461789	2.43441
0.0464081	2.20585
0.0466373	2.54416
0.0468665	2.88246
0.0470957	2.71494
0.0473249	2.24007
0.0475541	2.13017
0.0477833	2.32761
0.0480125	2.35217
0.0482417	2.37673
0.0484709	2.4285
0.0487001	2.78762
0.0489293	2.8586
0.0491585	2.62224
0.0493877	2.27703
0.0496169	2.23917
0.0498461	2.31655
0.0500753	2.39394
0.0503045	2.25883
0.0505337	2.12371
0.0507629	1.9886
0.0509921	1.85349
0.0512213	1.64795
0.0514505	1.4424
0.0516797	1.72988
0.0519089	2.01736
0.0521381	2.43931
0.0523673	2.55391
0.0525965	2.32916
0.0528257	2.1044
0.0530549	2.05253
0.0532841	2.00066
0.0535133	1.94878
0.0537425	1.89691
0.0539717	1.89906
0.0542009	1.90121
0.0544301	1.90336
0.0546593	1.90551
0.0548885	1.9845
0.0551177	2.06349
0.0553469	2.31535
0.0555761	2.25988
0.0558053	1.9803
0.0560345	1.70072
0.0562637	1.70927
0.0564929	1.71783
0.0567221	2.00811
0.0569513	2.29839
0.0571805	2.28134
0.0574097	2.26428
0.0576389	2.23939
0.0578681	2.21451
0.0580973	2.18962
0.0583265	2.16473
0.0585557	2.19747
0.0587849	2.23021
0.0590141	2.28216
0.0592433	2.33411
0.0594725	2.21478
0.0597017	2.40279
0.0599309	2.5908
0.0601601	2.47147
0.0603893	2.31373
0.0606185	2.15598
0.0608477	2.28636
0.0610769	2.41675
0.0613061	2.2646
0.0615353	2.11246
0.0617645	2.24845
0.0619937	2.38443
0.0622229	2.53963
0.0624521	2.38749
0.0626813	2.40822
0.0629105	2.42895
0.0631397	2.27201
0.0633689	2.11506
0.0635981	1.95811
0.0638273	1.80117
0.0640565	1.89393
0.0642857	1.9867
0.0645149	1.79134
0.0647441	1.59597
0.0649733	1.6067
0.0652025	1.92477
0.0654317	2.24284
0.0656609	2.25357
0.0658901	2.00178
0.0661193	1.74999
0.0663485	1.78633
0.0665777	1.82268
0.0668069	1.77738
0.0670361	1.73208
0.0672653	1.99413
0.0674945	2.25618
0.0677237	2.20448
0.0679529	2.15278
0.0681821	2.10108
0.0684113	2.04938
0.0686405	1.89844
0.0688697	1.74749
0.0690989	1.7118
0.0693281	1.98345
0.0695573	2.2551
0.0697865	2.21941
0.0700157	2.06846
0.0702449	1.91752
0.0704741	1.97307
0.0707033	2.02862
0.0709325	2.08417
0.0711617	2.13972
0.071391	2.33614
0.0716202	2.53255
0.0718494	2.21673
0.0720786	1.90091
0.0723078	1.82067
0.072537	1.74044
0.0727662	1.6602
0.0729954	1.57996
0.0732246	1.93513
0.0734538	2.29029
0.073683	2.24847
0.0739122	1.69442
0.0741414	1.39168
0.0743706	1.60117
0.0745998	1.79786
0.074829	1.99455
0.0750582	1.92872
0.0752874	1.86289
0.0755166	1.79706
0.0757458	1.73123
0.075975	1.79436
0.0762042	1.85749
0.0764334	1.92062
0.0766626	1.98375
0.0768918	2.23256
0.077121	2.48138
0.0773502	2.61494
0.0775794	2.44116
0.0778086	2.00966
0.0780378	1.8855
0.078267	2.08149
0.0784962	2.27748
0.0787254	2.43506
0.0789546	2.59263
0.0791838	2.73099
0.079413	2.86936
0.0796422	2.60193
0.0798714	2.02717
0.0801006	1.75975
0.0803298	1.79967
0.080559	2.06369
0.0807882	2.32771
0.0810174	2.47648
0.0812466	2.3179
0.0814758	2.28419
0.081705	2.25047
0.0819342	2.19755
0.0821634	2.14462
0.0823926	2.07249
0.0826218	2.00036
0.082851	1.92822
0.0830802	1.85609
0.0833094	1.8713
0.0835386	1.88651
0.0837678	1.90171
0.083997	1.91692
0.0842262	1.85529
0.0844554	1.79366
0.0846846	1.73203
0.0849138	1.67041
0.085143	1.78326
0.0853722	1.89611
0.0856014	2.00896
0.0858306	2.12181
0.0860598	2.23466
0.086289	2.34752
0.0865182	2.46037
0.0867474	2.57322
0.0869766	2.43886
0.0872058	2.3045
0.087435	2.17014
0.0876642	2.03577
0.0878934	1.92062
0.0881226	1.80547
0.0883518	1.69031
0.088581	1.57516
0.0888102	1.64569
0.0890394	1.71623
0.0892686	2.07489
0.0894978	2.43356
0.089727	2.58092
0.0899562	2.42095
0.0901854	2.14572
0.0904146	1.8705
0.0906438	1.89541
0.090873	2.22766
0.0911022	2.38703
0.0913314	2.54641
0.0915606	2.49448
0.0917898	2.44256
0.092019	2.39064
0.0922482	2.33871
0.0924774	2.28839
0.0927066	2.23807
0.0929358	2.47588
0.093165	2.71369
0.0933942	2.90667
0.0936234	2.79232
0.0938526	2.33861
0.0940818	1.8849
0.094311	2.03827
0.0945402	2.19165
0.0947694	2.34502
0.0949986	2.49839
0.0952278	2.61974
0.095457	2.7411
0.0956862	2.86245
0.0959154	2.98381
0.0961446	2.83464
0.0963738	2.68547
0.096603	2.36342
0.0968322	2.34872
0.0970614	2.62214
0.0972906	2.89557
0.0975198	2.66316
0.097749	2.12341
0.0979782	1.91822
0.0982074	2.02037
0.0984366	1.94963
0.0986658	1.8789
0.098895	2.01306
0.0991242	2.45457
0.0993534	2.72319
0.0995826	2.47958
0.0998118	1.91262
0.100041	1.653
0.10027	1.70072
0.100499	1.74844
0.100729	1.85379
0.100958	1.95914
0.101187	2.23737
0.101416	2.20825
0.101645	1.93823
0.101875	1.6682
0.102104	1.89121
0.102333	2.11421
0.102562	2.14512
0.102791	2.17604
0.103021	2.20695
0.10325	2.23787
0.103479	1.91022
0.103708	1.58257
0.103937	1.38938
0.104167	1.50353
0.104396	1.50243
0.104625	1.50133
0.104854	1.51944
0.105083	1.53754
0.105313	1.78496
0.105542	2.03237
0.105771	2.27979
0.106	2.5272
0.106229	2.3072
0.106459	2.0872
0.106688	1.8672
0.106917	1.64719
0.107146	1.55205
0.107375	1.45691
0.107605	1.6691
0.107834	1.8813
0.108063	1.99746
0.108292	2.11361
0.108521	2.22976
0.108751	2.34592
0.10898	2.14262
0.109209	1.93933
0.109438	1.56316
0.109667	1.49432
0.109897	1.80967
0.110126	2.12501
0.110355	2.17144
0.110584	2.21786
0.110813	2.19705
0.111043	2.48358
0.111272	2.77011
0.111501	2.7493
0.11173	2.39554
0.111959	2.04178
0.112189	1.97615
0.112418	1.91052
0.112647	1.94973
0.112876	1.98895
0.113105	2.04738
0.113335	2.10581
0.113564	2.1002
0.113793	2.40194
0.114022	2.70368
0.114251	2.69808
0.114481	2.37233
0.11471	2.04658
0.114939	2.21386
0.115168	2.38113
0.115397	2.33711
0.115627	2.29309
0.115856	2.24907
0.116085	2.20505
0.116314	2.28309
0.116543	2.36112
0.116773	2.43916
0.117002	2.51719
0.117231	2.49919
0.11746	2.48118
0.117689	2.44396
0.117919	2.40674
0.118148	2.50079
0.118377	2.28749
0.118606	1.95894
0.118835	1.63039
0.119065	1.4427
0.119294	1.56236
0.119523	1.81647
0.119752	2.07059
0.119982	2.0916
0.120211	2.11261
0.12044	2.13362
0.120669	2.15463
0.120898	2.25247
0.121128	2.35032
0.121357	2.33291
0.121586	2.00816
0.121815	1.57776
0.122044	1.45471
0.122274	1.6518
0.122503	1.84889
0.122732	1.6586
0.122961	1.46831
0.12319	1.59817
0.12342	2.03537
0.123649	2.3174
0.123878	2.29209
0.124107	2.29559
0.124336	2.29909
0.124566	2.12331
0.124795	1.79386
0.125024	1.62448
0.125253	1.76245
0.125482	2.02847
0.125712	2.14082
0.125941	2.19555
0.12617	2.25027
0.126399	2.17054
0.126628	1.93713
0.126858	1.60768
0.127087	1.58557
0.127316	1.76655
0.127545	1.79386
0.127774	1.73474
0.128004	1.98295
0.128233	2.28559
0.128462	2.28089
0.128691	2.10971
0.12892	1.93853
0.12915	2.00266
0.129379	2.06679
0.129608	1.97725
0.129837	1.88771
0.130066	2.02547
0.130296	2.16323
0.130525	2.301
0.130754	2.43876
0.130983	2.56202
0.131212	2.68527
0.131442	2.55241
0.131671	2.41955
0.1319	2.27068
0.132129	2.12181
0.132358	2.22906
0.132588	2.33631
0.132817	2.3075
0.133046	2.27869
0.133275	1.99375
0.133504	1.70882
0.133734	1.55835
0.133963	1.40788
0.134192	1.51353
0.134421	1.61918
0.13465	1.72403
0.13488	1.82888
0.135109	1.78006
0.135338	1.73123
0.135567	1.86169
0.135796	1.99215
0.136026	2.12261
0.136255	2.25307
0.136484	2.19945
0.136713	2.14582
0.136942	2.08259
0.137172	2.01937
0.137401	2.02657
0.13763	1.8801
0.137859	1.64719
0.138088	1.72163
0.138318	2.15593
0.138547	2.59023
0.138776	2.67237
0.139005	2.44716
0.139234	2.13232
0.139464	2.12481
0.139693	2.16533
0.139922	2.05218
0.140151	1.98225
0.14038	1.91232
0.14061	2.17214
0.140839	2.43196
0.141068	2.58933
0.141297	2.43936
0.141526	2.3086
0.141756	2.17784
0.141985	1.90902
0.142214	1.64019
0.142443	1.35216
0.142672	1.37147
0.142902	1.54765
0.143131	1.72383
0.14336	1.6631
0.143589	1.60237
0.143818	1.6489
0.144048	1.69542
0.144277	1.74194
0.144506	1.78846
0.144735	1.98545
0.144964	2.18244
0.145194	2.12331
0.145423	2.06419
0.145652	1.78726
0.145881	1.51033
0.14611	1.41909
0.14634	1.63519
0.146569	1.89291
0.146798	2.15063
0.147027	2.06899
0.147256	1.98735
0.147486	2.06739
0.147715	2.14742
0.147944	2.22746
0.148173	2.3075
0.148402	2.18584
0.148632	2.06419
0.148861	1.94253
0.14909	1.82087
0.149319	1.95774
0.149548	2.0946
0.149778	2.23146
0.150007	2.36833
0.150236	2.22346
0.150465	2.07859
0.150694	1.93373
0.150924	1.78886
0.151153	1.81047
0.151382	1.83208
0.151611	1.85369
0.15184	1.8753
0.15207	2.01536
0.152299	2.15543
0.152528	2.29549
0.152757	2.43556
0.152986	2.36312
0.153216	2.29069
0.153445	2.0838
0.153674	1.8769
0.153903	1.85249
0.154132	2.13542
0.154362	2.26468
0.154591	2.0866
0.15482	1.83808
0.155049	1.58957
0.155278	1.68041
0.155508	1.77125
0.155737	1.8685
0.155966	1.96574
0.156195	2.1014
0.156424	1.92972
0.156654	1.68781
0.156883	1.75324
0.157112	1.98515
0.157341	2.21706
0.15757	1.91112
0.1578	1.60518
0.158029	1.58737
0.158258	1.8769
0.158487	2.21446
0.158716	2.55201
0.158946	2.62064
0.159175	2.38193
0.159404	2.04718
0.159633	1.71242
0.159862	1.81947
0.160092	1.92652
0.160321	2.01646
0.16055	2.10641
0.160779	1.95944
0.161008	1.81247
0.161238	1.72313
0.161467	1.94113
0.161696	2.3128
0.161925	2.37713
0.162154	1.96444
0.162384	1.55175
0.162613	1.51043
0.162842	1.77645
0.163071	1.89521
0.1633	2.01396
0.16353	2.15193
0.163759	2.28989
0.163988	2.22596
0.164217	2.16203
0.164446	2.0981
0.164676	2.03417
0.164905	2.0983
0.165134	2.16243
0.165363	2.20735
0.165592	2.25227
0.165822	2.29079
0.166051	2.02197
0.16628	1.75314
0.166509	1.79166
0.166738	1.84619
0.166968	1.90071
0.167197	1.97445
0.167426	2.04818
0.167655	2.22676
0.167884	2.40534
0.168114	2.22536
0.168343	2.04538
0.168572	2.15993
0.168801	2.27448
0.16903	2.38904
0.16926	2.50359
0.169489	2.29479
0.169718	2.086
0.169947	2.13332
0.170176	2.18064
0.170406	2.25037
0.170635	2.3201
0.170864	2.13372
0.171093	1.94733
0.171322	1.74654
0.171552	1.54575
0.171781	1.68431
0.17201	1.82288
0.172239	2.00306
0.172468	1.8759
0.172698	1.76795
0.172927	1.66
0.173156	1.62088
0.173385	1.58176
0.173614	1.54265
0.173844	1.50353
0.174073	1.79416
0.174302	2.0848
0.174531	2.18974
0.17476	1.98735
0.17499	1.67981
0.175219	1.37227
0.175448	1.31444
0.175677	1.56396
0.175906	1.79106
0.176136	1.71082
0.176365	1.39368
0.176594	1.07653
0.176823	1.11315
0.177052	1.662
0.177282	2.21085
0.177511	2.24747
0.17774	1.95434
0.177969	1.6612
0.178198	1.69462
0.178428	1.72803
0.178657	1.77385
0.178886	1.81967
0.179115	2.1024
0.179344	2.38513
0.179574	2.3189
0.179803	1.94533
0.180032	1.72543
0.180261	1.81287
0.18049	1.82348
0.18072	1.83408
0.180949	1.86389
0.181178	1.89371
0.181407	1.85309
0.181636	1.81247
0.181866	1.57976
0.182095	1.6544
0.182324	1.97497
0.182553	1.9882
0.182783	1.74852
0.183012	1.6625
0.183241	1.93185
0.18347	2.2012
0.183699	2.21763
0.183929	2.08039
0.184158	2.0488
0.184387	2.17089
0.184616	2.1489
0.184845	1.97324
0.185075	1.75277
0.185304	1.83963
0.185533	2.16981
0.185762	2.34632
0.185991	2.26791
0.186221	1.88215
0.18645	1.4868
0.186679	1.39878
0.186908	1.42282
0.187137	1.44685
0.187367	1.4901
0.187596	1.53334
0.187825	1.56058
0.188054	1.58782
0.188283	1.61506
0.188513	1.64229
0.188742	1.82
0.188971	1.99771
0.1892	2.17541
0.189429	2.35312
0.189659	2.16723
0.189888	1.98135
0.190117	2.04838
0.190346	2.26908
0.190575	2.38413
0.190805	2.19185
0.191034	1.94193
0.191263	1.84569
0.191492	1.90952
0.191721	1.97334
0.191951	1.89311
0.19218	1.81287
0.192409	2.01436
0.192638	2.21586
0.192867	2.25087
0.193097	1.97855
0.193326	1.6642
0.193555	1.6572
0.193784	1.98955
0.194013	2.01456
0.194243	1.68741
0.194472	1.36026
0.194701	1.39488
0.19493	1.73684
0.195159	2.11401
0.195389	2.33751
0.195618	2.3081
0.195847	2.27869
0.196076	2.01877
0.196305	1.75885
0.196535	1.58217
0.196764	1.71283
0.196993	1.83916
0.197222	1.96549
0.197451	2.18787
0.197681	2.25658
0.19791	2.09157
0.198139	1.7729
0.198368	1.6047
0.198597	1.74384
0.198827	1.91179
0.199056	1.92607
0.199285	1.78989
0.199514	1.6537
0.199743	1.74481
0.199973	1.83593
0.200202	1.92705
0.200431	2.01817
0.20066	2.11488
0.200889	2.2116
0.201119	2.29872
0.201348	2.38583
0.201577	2.13039
0.201806	1.72128
0.202035	1.66753
0.202265	1.92112
0.202494	2.20032
0.202723	2.17219
0.202952	1.99038
0.203181	2.11591
0.203411	2.3599
0.20364	2.29654
0.203869	1.98027
0.204098	1.81767
0.204327	1.96144
0.204557	2.10521
0.204786	2.0953
0.205015	2.0854
0.205244	2.04348
0.205473	1.84789
0.205703	1.56586
0.205932	1.59117
0.206161	1.79896
0.20639	2.00676
0.206619	1.8848
0.206849	1.76285
0.207078	1.93543
0.207307	2.26168
0.207536	2.34782
0.207765	1.92172
0.207995	1.47922
0.208224	1.34406
0.208453	1.46501
0.208682	1.58597
0.208911	1.6685
0.209141	1.75104
0.20937	1.83358
0.209599	1.91612
0.209828	1.78576
0.210057	1.6554
0.210287	1.52504
0.210516	1.39468
0.210745	1.36356
0.210974	1.33245
0.211203	1.30134
0.211433	1.27022
0.211662	1.56966
0.211891	1.8691
0.21212	1.70752
0.212349	1.54595
0.212579	1.4324
0.212808	1.31884
0.213037	1.56386
0.213266	1.80887
0.213495	1.96424
0.213725	2.11961
0.213954	2.12131
0.214183	2.12301
0.214412	2.12471
0.214641	2.12642
0.214871	2.28179
0.2151	2.43716
0.215329	2.68057
0.215558	2.92398
0.215787	2.80883
0.216017	2.69368
0.216246	2.42165
0.216475	2.14963
0.216704	1.8776
0.216933	1.60558
0.217163	1.53844
0.217392	1.47131
0.217621	1.6603
0.21785	1.84929
0.218079	2.02227
0.218309	2.19525
0.218538	2.11211
0.218767	2.02897
0.218996	2.0876
0.219225	2.14622
0.219455	2.05438
0.219684	1.80887
0.219913	1.72983
0.220142	1.95814
0.220371	2.17684
0.220601	2.0882
0.22083	1.89871
0.221059	1.70922
0.221288	1.75665
0.221517	1.80407
0.221747	1.82588
0.221976	1.84769
0.222205	1.8695
0.222434	1.89131
0.222663	1.95914
0.222893	2.02697
0.223122	1.94113
0.223351	1.85529
0.22358	1.651
0.223809	1.4467
0.224039	1.49853
0.224268	1.55035
0.224497	1.64699
0.224726	1.74364
0.224955	1.99075
0.225185	2.39154
0.225414	2.7475
0.225643	2.79612
0.225872	2.58222
[truncated: 40,585 more rows]

## Sheet: XPS
TiO2				DOPA				DOPA-P1				DOPA-P2				DOPA-P1@P2
1350.08		234485		1350.08		234034		1350.08		194589		1350.08		203379		1350.08		191910
1349.08		238948		1349.08		226312		1349.08		191319		1349.08		203902		1349.08		191669
1348.08		241281		1348.08		230515		1348.08		192015		1348.08		204116		1348.08		195306
1347.08		235760		1347.08		226798		1347.08		192630		1347.08		204324		1347.08		195935
1346.08		238330		1346.08		230146		1346.08		192778		1346.08		208372		1346.08		196357
1345.08		235896		1345.08		226754		1345.08		191364		1345.08		204836		1345.08		197418
1344.08		234347		1344.08		224651		1344.08		192868		1344.08		207651		1344.08		200744
1343.08		237912		1343.08		228601		1343.08		196903		1343.08		203297		1343.08		194093
1342.08		237664		1342.08		223107		1342.08		193233		1342.08		206515		1342.08		193827
1341.08		236248		1341.08		223820		1341.08		191549		1341.08		206308		1341.08		192802
1340.08		233522		1340.08		228064		1340.08		192723		1340.08		205925		1340.08		195813
1339.08		233102		1339.08		224990		1339.08		194121		1339.08		208749		1339.08		200176
1338.08		236619		1338.08		224147		1338.08		192122		1338.08		207158		1338.08		195133
1337.08		236175		1337.08		226853		1337.08		190670		1337.08		205800		1337.08		195505
1336.08		236917		1336.08		223588		1336.08		194137		1336.08		201100		1336.08		195452
1335.08		239221		1335.08		229944		1335.08		193926		1335.08		209537		1335.08		193394
1334.08		235032		1334.08		231620		1334.08		194584		1334.08		206802		1334.08		195822
1333.08		232747		1333.08		229599		1333.08		192612		1333.08		203578		1333.08		197709
1332.08		235301		1332.08		228414		1332.08		193031		1332.08		206722		1332.08		192424
1331.08		236785		1331.08		230180		1331.08		188396		1331.08		204619		1331.08		195598
1330.08		234809		1330.08		226899		1330.08		190184		1330.08		203652		1330.08		193671
1329.08		238346		1329.08		224460		1329.08		193059		1329.08		206599		1329.08		193931
1328.08		233712		1328.08		220656		1328.08		191866		1328.08		203900		1328.08		198406
1327.08		236230		1327.08		225466		1327.08		194585		1327.08		205194		1327.08		196982
1326.08		238061		1326.08		224935		1326.08		195325		1326.08		204315		1326.08		194941
1325.08		232979		1325.08		228946		1325.08		191315		1325.08		205722		1325.08		198449
1324.08		232987		1324.08		227710		1324.08		194818		1324.08		208313		1324.08		196585
1323.08		237300		1323.08		223563		1323.08		191742		1323.08		206875		1323.08		194942
1322.08		230695		1322.08		228638		1322.08		191603		1322.08		206127		1322.08		196327
1321.08		232503		1321.08		229783		1321.08		191677		1321.08		210039		1321.08		197748
1320.08		235114		1320.08		229299		1320.08		193154		1320.08		207674		1320.08		197704
1319.08		238660		1319.08		229727		1319.08		195925		1319.08		216044		1319.08		199417
1318.08		234814		1318.08		225981		1318.08		195237		1318.08		212647		1318.08		197925
1317.08		234460		1317.08		227630		1317.08		192872		1317.08		212523		1317.08		197435
1316.08		236758		1316.08		226921		1316.08		194991		1316.08		206647		1316.08		197578
1315.08		234207		1315.08		231322		1315.08		195444		1315.08		209015		1315.08		202033
1314.08		232684		1314.08		225318		1314.08		195110		1314.08		205075		1314.08		199742
1313.08		233685		1313.08		227996		1313.08		198969		1313.08		208534		1313.08		197940
1312.08		235962		1312.08		224846		1312.08		197074		1312.08		208777		1312.08		200088
1311.08		236390		1311.08		227023		1311.08		194973		1311.08		210541		1311.08		202770
1310.08		232948		1310.08		226795		1310.08		197398		1310.08		209327		1310.08		199325
1309.08		234839		1309.08		227327		1309.08		194982		1309.08		213341		1309.08		199487
1308.08		238413		1308.08		227636		1308.08		195432		1308.08		209533		1308.08		199564
1307.08		235445		1307.08		224838		1307.08		199433		1307.08		212984		1307.08		203215
1306.08		236475		1306.08		229366		1306.08		196486		1306.08		210892		1306.08		198482
1305.08		237473		1305.08		228052		1305.08		198108		1305.08		209936		1305.08		199448
1304.08		239304		1304.08		229764		1304.08		197878		1304.08		215080		1304.08		203250
1303.08		237101		1303.08		234230		1303.08		198364		1303.08		212231		1303.08		203629
1302.08		232074		1302.08		232084		1302.08		193323		1302.08		210768		1302.08		202650
1301.08		234252		1301.08		228865		1301.08		197506		1301.08		208508		1301.08		204262
1300.08		232884		1300.08		231829		1300.08		193689		1300.08		212091		1300.08		206327
1299.08		233928		1299.08		229549		1299.08		197150		1299.08		211295		1299.08		201929
1298.08		236448		1298.08		231010		1298.08		195675		1298.08		213749		1298.08		205205
1297.08		237527		1297.08		231748		1297.08		198864		1297.08		214808		1297.08		206216
1296.08		237714		1296.08		232277		1296.08		199764		1296.08		214626		1296.08		205107
1295.08		238869		1295.08		235318		1295.08		197227		1295.08		215862		1295.08		205342
1294.08		238395		1294.08		232299		1294.08		198934		1294.08		212792		1294.08		201698
1293.08		238481		1293.08		234975		1293.08		197448		1293.08		218857		1293.08		205301
1292.08		235644		1292.08		232684		1292.08		200381		1292.08		215266		1292.08		206790
1291.08		238530		1291.08		231304		1291.08		201657		1291.08		217494		1291.08		203002
1290.08		239095		1290.08		231318		1290.08		198795		1290.08		218542		1290.08		205613
1289.08		242570		1289.08		233083		1289.08		202487		1289.08		217118		1289.08		208746
1288.08		236853		1288.08		232855		1288.08		201222		1288.08		221380		1288.08		205425
1287.08		242868		1287.08		234100		1287.08		205873		1287.08		218898		1287.08		208454
1286.08		244576		1286.08		236993		1286.08		205248		1286.08		218385		1286.08		205234
1285.08		244711		1285.08		234864		1285.08		202495		1285.08		218220		1285.08		210724
1284.08		244481		1284.08		238247		1284.08		201812		1284.08		218440		1284.08		210843
1283.08		243281		1283.08		236135		1283.08		205613		1283.08		218270		1283.08		207294
1282.08		243959		1282.08		236398		1282.08		202232		1282.08		220944		1282.08		209524
1281.08		243268		1281.08		238541		1281.08		205418		1281.08		218315		1281.08		207448
1280.08		242971		1280.08		238246		1280.08		205716		1280.08		219872		1280.08		208371
1279.08		244125		1279.08		239037		1279.08		204110		1279.08		221946		1279.08		213213
1278.08		248059		1278.08		239631		1278.08		204960		1278.08		222321		1278.08		210138
1277.08		249770		1277.08		236679		1277.08		204424		1277.08		222016		1277.08		209074
1276.08		246668		1276.08		240957		1276.08		204531		1276.08		223635		1276.08		210750
1275.08		247777		1275.08		242127		1275.08		208362		1275.08		225164		1275.08		215157
1274.08		250308		1274.08		245083		1274.08		211331		1274.08		223775		1274.08		220014
1273.08		247540		1273.08		242106		1273.08		210093		1273.08		224882		1273.08		214694
1272.08		249118		1272.08		244310		1272.08		212076		1272.08		227963		1272.08		218335
1271.08		247548		1271.08		242820		1271.08		209435		1271.08		221623		1271.08		213302
1270.08		252790		1270.08		242437		1270.08		210203		1270.08		229277		1270.08		212664
1269.08		250666		1269.08		249690		1269.08		207631		1269.08		225607		1269.08		216616
1268.08		251217		1268.08		238691		1268.08		210921		1268.08		226594		1268.08		216406
1267.08		251848		1267.08		245949		1267.08		210477		1267.08		224820		1267.08		218256
1266.08		255350		1266.08		245416		1266.08		211782		1266.08		228749		1266.08		218920
1265.08		251694		1265.08		240136		1265.08		212085		1265.08		231229		1265.08		219848
1264.08		252659		1264.08		247136		1264.08		213079		1264.08		231276		1264.08		217536
1263.08		251005		1263.08		249624		1263.08		212436		1263.08		230764		1263.08		222139
1262.08		254550		1262.08		249505		1262.08		213650		1262.08		231013		1262.08		220234
1261.08		254510		1261.08		251932		1261.08		214297		1261.08		236173		1261.08		219741
1260.08		256837		1260.08		250979		1260.08		214926		1260.08		232291		1260.08		217758
1259.08		256878		1259.08		247479		1259.08		211077		1259.08		231647		1259.08		220872
1258.08		258013		1258.08		254915		1258.08		218948		1258.08		233593		1258.08		218565
1257.08		260232		1257.08		248097		1257.08		214621		1257.08		234959		1257.08		223735
1256.08		262495		1256.08		251640		1256.08		217780		1256.08		239116		1256.08		224965
1255.08		262295		1255.08		256832		1255.08		215273		1255.08		238965		1255.08		222740
1254.08		258494		1254.08		252252		1254.08		218782		1254.08		233721		1254.08		223432
1253.08		263413		1253.08		256832		1253.08		224152		1253.08		242239		1253.08		226729
1252.08		258644		1252.08		256202		1252.08		220468		1252.08		239177		1252.08		225050
1251.08		263189		1251.08		258648		1251.08		220771		1251.08		240050		1251.08		225079
1250.08		262359		1250.08		254489		1250.08		223104		1250.08		239126		1250.08		225847
1249.08		265645		1249.08		258250		1249.08		219771		1249.08		243176		1249.08		226681
1248.08		267763		1248.08		255997		1248.08		224448		1248.08		239130		1248.08		226981
1247.08		268665		1247.08		262155		1247.08		225481		1247.08		243497		1247.08		227422
1246.08		270693		1246.08		262527		1246.08		229047		1246.08		240141		1246.08		233305
1245.08		269284		1245.08		263019		1245.08		224586		1245.08		249544		1245.08		232009
1244.08		269313		1244.08		262026		1244.08		230498		1244.08		246555		1244.08		231908
1243.08		270968		1243.08		265355		1243.08		224357		1243.08		248555		1243.08		230528
1242.08		272392		1242.08		263077		1242.08		230558		1242.08		249447		1242.08		232180
1241.08		271660		1241.08		267599		1241.08		223196		1241.08		247678		1241.08		235051
1240.08		275953		1240.08		265144		1240.08		231623		1240.08		246667		1240.08		235366
1239.08		277437		1239.08		266926		1239.08		229383		1239.08		250779		1239.08		237237
1238.08		274138		1238.08		264854		1238.08		229629		1238.08		249279		1238.08		233291
1237.08		275144		1237.08		266582		1237.08		226847		1237.08		249383		1237.08		231537
1236.08		273965		1236.08		264517		1236.08		226932		1236.08		249663		1236.08		232191
1235.08		278395		1235.08		271816		1235.08		229206		1235.08		249238		1235.08		234858
1234.08		276005		1234.08		268771		1234.08		232471		1234.08		251581		1234.08		233491
1233.08		285021		1233.08		269802		1233.08		236457		1233.08		252082		1233.08		234604
1232.08		284173		1232.08		272201		1232.08		233317		1232.08		253714		1232.08		238460
1231.08		284108		1231.08		275556		1231.08		233222		1231.08		259113		1231.08		242912
1230.08		289163		1230.08		279669		1230.08		235907		1230.08		256248		1230.08		244892
1229.08		286156		1229.08		283874		1229.08		241281		1229.08		264082		1229.08		248463
1228.08		289855		1228.08		283710		1228.08		245345		1228.08		261708		1228.08		250304
1227.08		292348		1227.08		281157		1227.08		245240		1227.08		266424		1227.08		250511
1226.08		288523		1226.08		288120		1226.08		242772		1226.08		262402		1226.08		252631
1225.08		294799		1225.08		285654		1225.08		246559		1225.08		262370		1225.08		250051
1224.08		293340		1224.08		285450		1224.08		246476		1224.08		268150		1224.08		248553
1223.08		295112		1223.08		282695		1223.08		241498		1223.08		263900		1223.08		252291
1222.08		295899		1222.08		284597		1222.08		245207		1222.08		264521		1222.08		245438
1221.08		288760		1221.08		284057		1221.08		241032		1221.08		258563		1221.08		246862
1220.08		288216		1220.08		275766		1220.08		235234		1220.08		256271		1220.08		240442
1219.08		283041		1219.08		281122		1219.08		238178		1219.08		253443		1219.08		237689
1218.08		284684		1218.08		271236		1218.08		228507		1218.08		250976		1218.08		232472
1217.08		277475		1217.08		268160		1217.08		227435		1217.08		249314		1217.08		229488
1216.08		273460		1216.08		262390		1216.08		220871		1216.08		243625		1216.08		223559
1215.08		276790		1215.08		261924		1215.08		221149		1215.08		239379		1215.08		222352
1214.08		272512		1214.08		263323		1214.08		216522		1214.08		236893		1214.08		223869
1213.08		268545		1213.08		259356		1213.08		218138		1213.08		233073		1213.08		220466
1212.08		266442		1212.08		257180		1212.08		216227		1212.08		229627		1212.08		216016
1211.08		264533		1211.08		253013		1211.08		214063		1211.08		230976		1211.08		215542
1210.08		264939		1210.08		255217		1210.08		211727		1210.08		228725		1210.08		218226
1209.08		261928		1209.08		256008		1209.08		208434		1209.08		232288		1209.08		213992
1208.08		263525		1208.08		255214		1208.08		215451		1208.08		232123		1208.08		214409
1207.08		262743		1207.08		252336		1207.08		213805		1207.08		228822		1207.08		215010
1206.08		258460		1206.08		260326		1206.08		214943		1206.08		228081		1206.08		219471
1205.08		266083		1205.08		247223		1205.08		211967		1205.08		228013		1205.08		219457
1204.08		266019		1204.08		256208		1204.08		213414		1204.08		231493		1204.08		218041
1203.08		267393		1203.08		256284		1203.08		209653		1203.08		227252		1203.08		218343
1202.08		269105		1202.08		253182		1202.08		213812		1202.08		230071		1202.08		217543
1201.08		266599		1201.08		255746		1201.08		215032		1201.08		229847		1201.08		216795
1200.08		262346		1200.08		259610		1200.08		211568		1200.08		229762		1200.08		216894
1199.08		265114		1199.08		257943		1199.08		211073		1199.08		226253		1199.08		222435
1198.08		267146		1198.08		256429		1198.08		215374		1198.08		232020		1198.08		218551
1197.08		274045		1197.08		259183		1197.08		212115		1197.08		232916		1197.08		219475
1196.08		270708		1196.08		260316		1196.08		213530		1196.08		229100		1196.08		216428
1195.08		264428		1195.08		262676		1195.08		213275		1195.08		235879		1195.08		217405
1194.08		268350		1194.08		258526		1194.08		219103		1194.08		231081		1194.08		218431
1193.08		273588		1193.08		258306		1193.08		218209		1193.08		235196		1193.08		219114
1192.08		269830		1192.08		260777		1192.08		214907		1192.08		238444		1192.08		219910
1191.08		271720		1191.08		261861		1191.08		215871		1191.08		233597		1191.08		218966
1190.08		267423		1190.08		263926		1190.08		217427		1190.08		229906		1190.08		217501
1189.08		266192		1189.08		258829		1189.08		214461		1189.08		234705		1189.08		219852
1188.08		265536		1188.08		263993		1188.08		213204		1188.08		234979		1188.08		220759
1187.08		268975		1187.08		259477		1187.08		214830		1187.08		236076		1187.08		223519
1186.08		269145		1186.08		261700		1186.08		216808		1186.08		232918		1186.08		222746
1185.08		272986		1185.08		261652		1185.08		216040		1185.08		239367		1185.08		218981
1184.08		269106		1184.08		265236		1184.08		216393		1184.08		236016		1184.08		222015
1183.08		271190		1183.08		262281		1183.08		217106		1183.08		235998		1183.08		225419
1182.08		273082		1182.08		263242		1182.08		216873		1182.08		235787		1182.08		222858
1181.08		269171		1181.08		260906		1181.08		219847		1181.08		236654		1181.08		221257
1180.08		270293		1180.08		270385		1180.08		220003		1180.08		235981		1180.08		223234
1179.08		273449		1179.08		267729		1179.08		222067		1179.08		237247		1179.08		223338
1178.08		270341		1178.08		264341		1178.08		219867		1178.08		237430		1178.08		223887
1177.08		273220		1177.08		268089		1177.08		221768		1177.08		237963		1177.08		222340
1176.08		274022		1176.08		267972		1176.08		218272		1176.08		237434		1176.08		221786
1175.08		272915		1175.08		266815		1175.08		218621		1175.08		242595		1175.08		224565
1174.08		272277		1174.08		264492		1174.08		219912		1174.08		237464		1174.08		228403
1173.08		272232		1173.08		267167		1173.08		220793		1173.08		239897		1173.08		224885
1172.08		271933		1172.08		267150		1172.08		218455		1172.08		240209		1172.08		224666
1171.08		275113		1171.08		265910		1171.08		221543		1171.08		236620		1171.08		228881
1170.08		273841		1170.08		267377		1170.08		222782		1170.08		239666		1170.08		222244
1169.08		276819		1169.08		268855		1169.08		222193		1169.08		240463		1169.08		225463
1168.08		274308		1168.08		272255		1168.08		224276		1168.08		240742		1168.08		225083
1167.08		278159		1167.08		267491		1167.08		221382		1167.08		239531		1167.08		226061
1166.08		278812		1166.08		269908		1166.08		224844		1166.08		242614		1166.08		229887
1165.08		280940		1165.08		267532		1165.08		224496		1165.08		243548		1165.08		221575
1164.08		282774		1164.08		271012		1164.08		222521		1164.08		240333		1164.08		227354
1163.08		277633		1163.08		272126		1163.08		226739		1163.08		239948		1163.08		225768
1162.08		278576		1162.08		274701		1162.08		224819		1162.08		240211		1162.08		226089
1161.08		278413		1161.08		271793		1161.08		224637		1161.08		241066		1161.08		229198
1160.08		277227		1160.08		271298		1160.08		224944		1160.08		244129		1160.08		229520
1159.08		278255		1159.08		271962		1159.08		227601		1159.08		242500		1159.08		232111
1158.08		277435		1158.08		273667		1158.08		224882		1158.08		245391		1158.08		226858
1157.08		284985		1157.08		276284		1157.08		226373		1157.08		243560		1157.08		225878
1156.08		278535		1156.08		272045		1156.08		229122		1156.08		243871		1156.08		225818
1155.08		283479		1155.08		275731		1155.08		229334		1155.08		241664		1155.08		228776
1154.08		280124		1154.08		279495		1154.08		228198		1154.08		238449		1154.08		226485
1153.08		280507		1153.08		276485		1153.08		227407		1153.08		238481		1153.08		226476
1152.08		282434		1152.08		270769		1152.08		229546		1152.08		243945		1152.08		230252
1151.08		283903		1151.08		274242		1151.08		226619		1151.08		241644		1151.08		230674
1150.08		279263		1150.08		275300		1150.08		226798		1150.08		241953		1150.08		226963
1149.08		281911		1149.08		276760		1149.08		230507		1149.08		244757		1149.08		229574
1148.08		279720		1148.08		270580		1148.08		225981		1148.08		245651		1148.08		232419
1147.08		281276		1147.08		272264		1147.08		230594		1147.08		240222		1147.08		231598
1146.08		283668		1146.08		271348		1146.08		226615		1146.08		240450		1146.08		225454
1145.08		282149		1145.08		273033		1145.08		227379		1145.08		240256		1145.08		228283
1144.08		278805		1144.08		275555		1144.08		228879		1144.08		241866		1144.08		227851
1143.08		284630		1143.08		275785		1143.08		234394		1143.08		244938		1143.08		228085
1142.08		283297		1142.08		276457		1142.08		232361		1142.08		243946		1142.08		230303
1141.08		283071		1141.08		273670		1141.08		230825		1141.08		243700		1141.08		227854
1140.08		283862		1140.08		274754		1140.08		227998		1140.08		246271		1140.08		227692
1139.08		286810		1139.08		278091		1139.08		233715		1139.08		244879		1139.08		231678
1138.08		285353		1138.08		277142		1138.08		229205		1138.08		245930		1138.08		229729
1137.08		290430		1137.08		274979		1137.08		229167		1137.08		248310		1137.08		232043
1136.08		288453		1136.08		277459		1136.08		235778		1136.08		241994		1136.08		230926
1135.08		288512		1135.08		275604		1135.08		233929		1135.08		244995		1135.08		230831
1134.08		289733		1134.08		277513		1134.08		232856		1134.08		245088		1134.08		233655
1133.08		289556		1133.08		283036		1133.08		232742		1133.08		243718		1133.08		231382
1132.08		292950		1132.08		276466		1132.08		235185		1132.08		243933		1132.08		231928
1131.08		288903		1131.08		275869		1131.08		233294		1131.08		246304		1131.08		231412
1130.08		287840		1130.08		276654		1130.08		232627		1130.08		246611		1130.08		232751
1129.08		288669		1129.08		279623		1129.08		232668		1129.08		244063		1129.08		232033
1128.08		286973		1128.08		276939		1128.08		235256		1128.08		246060		1128.08		230654
1127.08		284562		1127.08		276491		1127.08		235738		1127.08		243537		1127.08		232047
1126.08		288331		1126.08		281653		1126.08		232697		1126.08		246388		1126.08		231047
1125.08		289596		1125.08		278218		1125.08		237869		1125.08		246218		1125.08		229163
1124.08		284866		1124.08		271031		1124.08		231794		1124.08		244012		1124.08		233318
1123.08		282099		1123.08		275970		1123.08		233393		1123.08		244349		1123.08		233880
1122.08		284152		1122.08		272852		1122.08		233528		1122.08		245999		1122.08		230005
1121.08		284449		1121.08		272101		1121.08		234090		1121.08		248463		1121.08		230224
1120.08		285111		1120.08		265585		1120.08		233348		1120.08		243433		1120.08		231085
1119.08		281938		1119.08		274314		1119.08		231109		1119.08		243530		1119.08		229947
1118.08		276843		1118.08		271990		1118.08		232807		1118.08		239423		1118.08		234258
1117.08		281995		1117.08		272462		1117.08		235839		1117.08		237612		1117.08		229200
1116.08		283252		1116.08		266826		1116.08		231543		1116.08		241627		1116.08		226451
1115.08		279336		1115.08		275046		1115.08		234187		1115.08		242521		1115.08		226534
1114.08		282388		1114.08		273413		1114.08		233994		1114.08		244285		1114.08		232884
1113.08		281499		1113.08		270894		1113.08		233130		1113.08		242463		1113.08		230150
1112.08		280473		1112.08		271359		1112.08		232631		1112.08		246633		1112.08		227008
1111.08		277730		1111.08		276148		1111.08		235376		1111.08		236354		1111.08		230763
1110.08		284152		1110.08		271662		1110.08		235326		1110.08		237181		1110.08		230074
1109.08		285159		1109.08		276429		1109.08		238944		1109.08		242344		1109.08		232355
1108.08		288177		1108.08		279733		1108.08		237196		1108.08		244882		1108.08		232141
1107.08		297223		1107.08		283531		1107.08		240010		1107.08		246414		1107.08		233255
1106.08		294898		1106.08		284025		1106.08		237325		1106.08		246556		1106.08		236171
1105.08		292763		1105.08		280532		1105.08		239319		1105.08		243672		1105.08		234340
1104.08		288219		1104.08		283144		1104.08		235322		1104.08		241180		1104.08		230012
1103.08		288673		1103.08		274944		1103.08		237183		1103.08		244983		1103.08		228886
1102.08		286875		1102.08		273183		1102.08		238202		1102.08		242285		1102.08		225122
1101.08		284040		1101.08		270123		1101.08		237732		1101.08		236736		1101.08		228802
1100.08		282189		1100.08		268429		1100.08		233084		1100.08		237766		1100.08		223278
1099.08		269939		1099.08		268749		1099.08		231991		1099.08		233102		1099.08		225350
1098.08		268090		1098.08		263553		1098.08		228420		1098.08		234481		1098.08		224200
1097.08		266941		1097.08		257283		1097.08		226149		1097.08		232446		1097.08		223409
1096.08		267526		1096.08		256973		1096.08		225291		1096.08		232684		1096.08		218762
1095.08		261662		1095.08		256429		1095.08		228216		1095.08		230860		1095.08		223113
1094.08		258947		1094.08		257289		1094.08		222655		1094.08		231579		1094.08		220163
1093.08		260102		1093.08		250398		1093.08		223252		1093.08		233008		1093.08		220621
1092.08		260996		1092.08		256612		1092.08		222303		1092.08		231010		1092.08		221196
1091.08		261286		1091.08		259341		1091.08		226909		1091.08		231858		1091.08		220005
1090.08		264993		1090.08		256843		1090.08		223348		1090.08		231221		1090.08		223267
1089.08		260632		1089.08		254909		1089.08		225071		1089.08		232024		1089.08		223747
1088.08		261303		1088.08		254684		1088.08		224403		1088.08		231247		1088.08		222630
1087.08		261010		1087.08		255881		1087.08		224427		1087.08		232906		1087.08		222257
1086.08		260695		1086.08		255196		1086.08		227189		1086.08		231665		1086.08		221067
1085.08		261813		1085.08		252414		1085.08		223266		1085.08		229367		1085.08		219166
1084.08		257750		1084.08		256436		1084.08		224275		1084.08		234489		1084.08		221635
1083.08		256453		1083.08		253561		1083.08		226726		1083.08		229684		1083.08		219749
1082.08		258292		1082.08		255293		1082.08		224907		1082.08		232571		1082.08		223229
1081.08		259219		1081.08		252944		1081.08		224679		1081.08		230280		1081.08		220078
1080.08		260471		1080.08		255682		1080.08		226445		1080.08		230252		1080.08		223721
1079.08		259539		1079.08		251636		1079.08		225680		1079.08		231170		1079.08		222011
1078.08		258826		1078.08		255148		1078.08		227365		1078.08		234414		1078.08		224943
1077.08		263763		1077.08		258326		1077.08		226230		1077.08		231937		1077.08		221737
1076.08		268308		1076.08		259751		1076.08		226189		1076.08		231834		1076.08		220434
1075.08		267354		1075.08		262293		1075.08		231894		1075.08		235182		1075.08		226283
1074.08		264317		1074.08		260671		1074.08		231290		1074.08		236389		1074.08		227809
1073.08		270777		1073.08		262290		1073.08		233155		1073.08		235955		1073.08		227611
1072.08		277192		1072.08		265475		1072.08		230929		1072.08		239892		1072.08		226851
1071.08		273330		1071.08		263858		1071.08		231844		1071.08		237295		1071.08		227372
1070.08		270081		1070.08		264119		1070.08		234753		1070.08		239575		1070.08		224556
1069.08		270294		1069.08		261857		1069.08		234022		1069.08		235975		1069.08		229237
1068.08		267316		1068.08		260310		1068.08		231696		1068.08		235849		1068.08		224295
1067.08		266772		1067.08		261837		1067.08		233071		1067.08		239011		1067.08		225691
1066.08		267756		1066.08		260686		1066.08		234880		1066.08		239273		1066.08		224782
1065.08		263354		1065.08		256082		1065.08		231544		1065.08		237556		1065.08		226453
1064.08		261010		1064.08		252981		1064.08		230013		1064.08		233509		1064.08		224379
1063.08		263157		1063.08		254288		1063.08		229096		1063.08		233596		1063.08		225158
1062.08		260704		1062.08		256689		1062.08		233838		1062.08		235617		1062.08		230701
1061.08		264713		1061.08		255066		1061.08		231538		1061.08		240686		1061.08		227608
1060.08		260586		1060.08		257942		1060.08		228698		1060.08		239357		1060.08		227443
1059.08		263174		1059.08		256955		1059.08		232834		1059.08		235159		1059.08		227771
1058.08		262649		1058.08		256252		1058.08		232736		1058.08		233779		1058.08		226641
1057.08		259745		1057.08		258153		1057.08		232688		1057.08		236475		1057.08		229367
1056.08		262775		1056.08		253907		1056.08		234578		1056.08		236600		1056.08		227997
1055.08		261509		1055.08		255591		1055.08		234179		1055.08		236898		1055.08		223452
1054.08		267417		1054.08		261694		1054.08		234085		1054.08		233816		1054.08		226110
1053.08		262180		1053.08		259645		1053.08		235644		1053.08		239770		1053.08		227690
1052.08		263549		1052.08		262344		1052.08		234297		1052.08		241291		1052.08		228099
1051.08		263928		1051.08		260427		1051.08		235404		1051.08		237823		1051.08		229032
1050.08		265126		1050.08		263315		1050.08		235791		1050.08		239225		1050.08		228855
1049.08		267488		1049.08		261965		1049.08		236867		1049.08		241558		1049.08		229643
1048.08		266898		1048.08		259972		1048.08		235986		1048.08		239296		1048.08		229027
1047.08		270011		1047.08		262953		1047.08		235086		1047.08		240078		1047.08		229018
1046.08		272168		1046.08		263905		1046.08		239627		1046.08		239195		1046.08		229665
1045.08		276864		1045.08		263916		1045.08		234220		1045.08		242657		1045.08		231741
1044.08		278271		1044.08		267979		1044.08		235294		1044.08		240586		1044.08		231778
1043.08		270984		1043.08		267691		1043.08		234001		1043.08		238555		1043.08		229356
1042.08		270648		1042.08		263759		1042.08		240606		1042.08		244414		1042.08		232286
1041.08		272499		1041.08		266473		1041.08		236469		1041.08		241785		1041.08		232024
1040.08		270966		1040.08		267573		1040.08		236422		1040.08		244721		1040.08		233608
1039.08		266164		1039.08		267835		1039.08		245690		1039.08		240734		1039.08		235428
1038.08		269911		1038.08		267606		1038.08		240585		1038.08		243139		1038.08		237814
1037.08		271877		1037.08		262732		1037.08		238005		1037.08		242180		1037.08		231784
1036.08		276193		1036.08		270860		1036.08		237295		1036.08		242089		1036.08		236753
1035.08		270836		1035.08		268440		1035.08		242980		1035.08		243126		1035.08		235059
1034.08		271330		1034.08		267590		1034.08		236098		1034.08		245619		1034.08		235470
1033.08		271689		1033.08		270830		1033.08		239506		1033.08		245552		1033.08		232250
1032.08		272709		1032.08		266146		1032.08		238976		1032.08		247247		1032.08		235670
1031.08		273978		1031.08		270047		1031.08		240116		1031.08		245322		1031.08		234788
1030.08		271648		1030.08		266323		1030.08		239104		1030.08		245957		1030.08		235205
1029.08		270181		1029.08		272502		1029.08		241084		1029.08		244130		1029.08		235764
1028.08		270772		1028.08		269381		1028.08		243087		1028.08		244587		1028.08		235820
1027.08		274806		1027.08		269120		1027.08		242452		1027.08		244419		1027.08		231140
1026.08		277545		1026.08		268304		1026.08		245634		1026.08		249166		1026.08		237913
1025.08		275347		1025.08		274554		1025.08		245894		1025.08		250552		1025.08		236585
1024.08		278194		1024.08		268926		1024.08		243854		1024.08		250737		1024.08		241540
1023.08		280370		1023.08		272383		1023.08		246871		1023.08		250450		1023.08		241436
1022.08		289183		1022.08		278635		1022.08		245433		1022.08		253088		1022.08		239580
1021.08		291974		1021.08		281984		1021.08		244657		1021.08		250753		1021.08		245591
1020.08		283026		1020.08		277994		1020.08		245589		1020.08		249054		1020.08		235635
1019.08		279943		1019.08		271823		1019.08		242221		1019.08		247300		1019.08		238474
1018.08		279244		1018.08		276434		1018.08		247610		1018.08		250875		1018.08		239856
1017.08		280325		1017.08		274897		1017.08		246874		1017.08		249590		1017.08		240802
1016.08		278675		1016.08		278507		1016.08		246141		1016.08		251740		1016.08		239398
1015.08		279177		1015.08		281887		1015.08		246349		1015.08		251032		1015.08		239117
1014.08		280717		1014.08		275625		1014.08		250756		1014.08		246232		1014.08		236403
1013.08		279441		1013.08		277780		1013.08		248240		1013.08		249742		1013.08		241614
1012.08		282182		1012.08		279093		1012.08		246339		1012.08		251344		1012.08		239518
1011.08		281307		1011.08		275809		1011.08		250400		1011.08		248853		1011.08		240461
1010.08		283594		1010.08		277658		1010.08		244635		1010.08		250157		1010.08		239830
1009.08		285305		1009.08		275363		1009.08		246300		1009.08		246191		1009.08		237818
1008.08		281379		1008.08		278402		1008.08		246894		1008.08		251055		1008.08		241796
1007.08		283035		1007.08		279537		1007.08		244156		1007.08		248527		1007.08		241906
1006.08		281249		1006.08		276383		1006.08		247389		1006.08		252670		1006.08		237644
1005.08		285965		1005.08		277727		1005.08		250546		1005.08		252058		1005.08		242554
1004.08		289137		1004.08		275375		1004.08		252692		1004.08		251976		1004.08		243905
1003.08		289661		1003.08		278899		1003.08		256242		1003.08		252651		1003.08		242010
1002.08		286558		1002.08		282668		1002.08		255731		1002.08		254229		1002.08		244007
1001.08		292021		1001.08		283757		1001.08		258699		1001.08		255744		1001.08		248191
1000.08		294432		1000.08		284782		1000.08		260389		1000.08		255818		1000.08		244796
999.08		288793		999.08		282628		999.08		256640		999.08		259534		999.08		242970
998.08		294181		998.08		287892		998.08		254338		998.08		255195		998.08		247819
997.08		286046		997.08		284468		997.08		256768		997.08		257440		997.08		242843
996.08		293553		996.08		283680		996.08		260182		996.08		252199		996.08		244514
995.08		301950		995.08		284698		995.08		253816		995.08		255661		995.08		248860
994.08		293038		994.08		286490		994.08		250053		994.08		256479		994.08		245782
993.08		289346		993.08		282591		993.08		252168		993.08		255129		993.08		241968
992.08		288957		992.08		277070		992.08		243719		992.08		249181		992.08		242284
991.08		283621		991.08		270993		991.08		245440		991.08		245889		991.08		237210
990.08		275161		990.08		268796		990.08		241486		990.08		245081		990.08		239799
989.08		274409		989.08		270327		989.08		237771		989.08		238617		989.08		236266
988.08		273808		988.08		269032		988.08		239590		988.08		243077		988.08		228583
987.08		272471		987.08		262988		987.08		237180		987.08		242619		987.08		236241
986.08		267558		986.08		266115		986.08		237029		986.08		236767		986.08		231157
985.08		266382		985.08		262391		985.08		236561		985.08		240321		985.08		231094
984.08		267539		984.08		258275		984.08		239461		984.08		239475		984.08		230880
983.08		271162		983.08		263607		983.08		236319		983.08		239335		983.08		229692
982.08		267615		982.08		262845		982.08		240293		982.08		243894		982.08		231800
981.08		274749		981.08		266783		981.08		249983		981.08		245125		981.08		237391
980.08		274365		980.08		269692		980.08		252563		980.08		247801		980.08		237755
979.08		286091		979.08		280816		979.08		257687		979.08		252125		979.08		245400
978.08		291869		978.08		289981		978.08		264456		978.08		257212		978.08		250725
977.08		306288		977.08		302838		977.08		275874		977.08		262757		977.08		256713
976.08		322580		976.08		311556		976.08		277811		976.08		271102		976.08		261257
975.08		329371		975.08		319456		975.08		275628		975.08		280008		975.08		262210
974.08		332254		974.08		318635		974.08		268273		974.08		277898		974.08		262667
973.08		314545		973.08		302111		973.08		263257		973.08		266269		973.08		254107
972.08		292836		972.08		284561		972.08		257946		972.08		256388		972.08		250994
971.08		281464		971.08		275734		971.08		246079		971.08		249348		971.08		244143
970.08		273979		970.08		264100		970.08		242689		970.08		243156		970.08		235491
969.08		259734		969.08		253370		969.08		233967		969.08		235645		969.08		229944
968.08		257323		968.08		248173		968.08		227749		968.08		225453		968.08		225915
967.08		251028		967.08		243430		967.08		220546		967.08		224215		967.08		219242
966.08		241049		966.08		236273		966.08		219782		966.08		220278		966.08		216856
965.08		235953		965.08		232065		965.08		215613		965.08		218742		965.08		214623
964.08		229543		964.08		226533		964.08		214779		964.08		212414		964.08		208888
963.08		228617		963.08		222757		963.08		210158		963.08		214268		963.08		210095
962.08		227314		962.08		225095		962.08		209721		962.08		214047		962.08		209452
961.08		223017		961.08		220428		961.08		211002		961.08		213018		961.08		210828
960.08		226006		960.08		226905		960.08		208456		960.08		211928		960.08		213837
959.08		227609		959.08		226362		959.08		212263		959.08		211389		959.08		213536
958.08		223797		958.08		227221		958.08		210488		958.08		215450		958.08		213661
957.08		225002		957.08		226253		957.08		213573		957.08		210761		957.08		210713
956.08		221793		956.08		226842		956.08		212791		956.08		214671		956.08		213220
955.08		226270		955.08		228521		955.08		218167		955.08		215691		955.08		210139
954.08		229016		954.08		226625		954.08		214383		954.08		216417		954.08		211384
953.08		229831		953.08		227788		953.08		214249		953.08		216337		953.08		209353
952.08		228031		952.08		228008		952.08		216056		952.08		219819		952.08		213928
951.08		227401		951.08		224868		951.08		215040		951.08		215778		951.08		212929
950.08		229594		950.08		228345		950.08		213613		950.08		215707		950.08		213035
949.08		229275		949.08		224002		949.08		215406		949.08		218550		949.08		216361
948.08		227345		948.08		230216		948.08		217099		948.08		216881		948.08		210589
947.08		236201		947.08		230500		947.08		213192		947.08		218293		947.08		212849
946.08		232954		946.08		229123		946.08		217005		946.08		217042		946.08		216754
945.08		232665		945.08		230145		945.08		218313		945.08		216069		945.08		216234
944.08		235075		944.08		231939		944.08		220391		944.08		219833		944.08		215209
943.08		232093		943.08		230758		943.08		215685		943.08		219255		943.08		214518
942.08		234824		942.08		229184		942.08		219790		942.08		221499		942.08		216648
941.08		233720		941.08		232004		941.08		220150		941.08		221066		941.08		221754
940.08		233855		940.08		232212		940.08		219022		940.08		220349		940.08		219356
939.08		234908		939.08		232560		939.08		218661		939.08		220821		939.08		217657
938.08		236652		938.08		234038		938.08		220888		938.08		226665		938.08		220802
937.08		236935		937.08		232825		937.08		224885		937.08		219575		937.08		218539
936.08		239377		936.08		236734		936.08		222481		936.08		220352		936.08		220409
935.08		234892		935.08		234683		935.08		221043		935.08		223596		935.08		216319
934.08		234620		934.08		236773		934.08		223634		934.08		225969		934.08		219674
933.08		238948		933.08		238542		933.08		219716		933.08		221507		933.08		222876
932.08		235872		932.08		235716		932.08		225399		932.08		221769		932.08		221120
931.08		242800		931.08		234781		931.08		224336		931.08		225821		931.08		221957
930.08		238598		930.08		240865		930.08		225151		930.08		226889		930.08		225444
929.08		240493		929.08		235220		929.08		225399		929.08		225531		929.08		224295
928.08		239086		928.08		240339		928.08		222821		928.08		226688		928.08		226287
927.08		247519		927.08		239334		927.08		222608		927.08		228427		927.08		224348
926.08		242239		926.08		237532		926.08		226187		926.08		230502		926.08		228610
925.08		243030		925.08		236690		925.08		227469		925.08		228600		925.08		223828
924.08		241544		924.08		239955		924.08		221411		924.08		226634		924.08		221779
923.08		243793		923.08		241012		923.08		227909		923.08		230911		923.08		230033
922.08		244048		922.08		239134		922.08		224233		922.08		225712		922.08		224515
921.08		242576		921.08		244477		921.08		226193		921.08		226442		921.08		225342
920.08		244007		920.08		239985		920.08		229496		920.08		227140		920.08		224566
919.08		244993		919.08		243678		919.08		229700		919.08		234053		919.08		227434
918.08		245050		918.08		239763		918.08		227417		918.08		231729		918.08		228935
917.08		243329		917.08		240367		917.08		229008		917.08		230294		917.08		227444
916.08		248759		916.08		245785		916.08		229355		916.08		233906		916.08		226842
915.08		248771		915.08		244905		915.08		228049		915.08		231601		915.08		228085
914.08		244354		914.08		244881		914.08		228740		914.08		233940		914.08		230494
913.08		245867		913.08		242298		913.08		236136		913.08		235456		913.08		230574
912.08		250833		912.08		246344		912.08		233247		912.08		231974		912.08		230602
911.08		246799		911.08		244192		911.08		231410		911.08		237362		911.08		227501
910.08		247438		910.08		246576		910.08		227995		910.08		236981		910.08		228813
909.08		249611		909.08		246304		909.08		230803		909.08		234196		909.08		231316
908.08		250414		908.08		250280		908.08		236989		908.08		234771		908.08		236553
907.08		248874		907.08		243519		907.08		231998		907.08		238981		907.08		230687
906.08		248907		906.08		248871		906.08		232188		906.08		236831		906.08		232441
905.08		251909		905.08		249683		905.08		232787		905.08		238093		905.08		231753
904.08		254560		904.08		248416		904.08		236148		904.08		237150		904.08		236332
903.08		253677		903.08		250582		903.08		233524		903.08		238453		903.08		232521
902.08		251467		902.08		249052		902.08		237292		902.08		238550		902.08		233326
901.08		257636		901.08		255231		901.08		236797		901.08		243639		901.08		234382
900.08		256642		900.08		252624		900.08		237736		900.08		238706		900.08		235758
899.08		256025		899.08		252297		899.08		236263		899.08		238332		899.08		234983
898.08		257225		898.08		250462		898.08		237750		898.08		240379		898.08		234895
897.08		260126		897.08		252249		897.08		239010		897.08		238767		897.08		233248
896.08		258740		896.08		255171		896.08		236758		896.08		241287		896.08		234224
895.08		255975		895.08		252422		895.08		237280		895.08		238560		895.08		241151
894.08		255635		894.08		253335		894.08		241379		894.08		240249		894.08		236636
893.08		255112		893.08		253749		893.08		236830		893.08		241205		893.08		240324
892.08		255033		892.08		253225		892.08		238803		892.08		243964		892.08		236221
891.08		259216		891.08		256139		891.08		238866		891.08		240537		891.08		241762
890.08		259586		890.08		253926		890.08		240395		890.08		241403		890.08		241876
889.08		260827		889.08		258646		889.08		242128		889.08		241950		889.08		238106
888.08		258281		888.08		255957		888.08		242099		888.08		243027		888.08		237224
887.08		258319		887.08		252756		887.08		241882		887.08		247494		887.08		244696
886.08		261231		886.08		257371		886.08		240675		886.08		242714		886.08		240902
885.08		262248		885.08		259904		885.08		239731		885.08		245260		885.08		243904
884.08		264069		884.08		257131		884.08		243007		884.08		244836		884.08		240772
883.08		265854		883.08		255555		883.08		238810		883.08		247969		883.08		241140
882.08		262211		882.08		262283		882.08		242925		882.08		243565		882.08		240874
881.08		260704		881.08		262413		881.08		245021		881.08		246434		881.08		244384
880.08		261519		880.08		257365		880.08		245928		880.08		250262		880.08		245058
879.08		262898		879.08		261182		879.08		238497		879.08		249447		879.08		249255
878.08		258165		878.08		259550		878.08		241098		878.08		249334		878.08		246653
877.08		261124		877.08		256641		877.08		242034		877.08		248642		877.08		244058
876.08		264434		876.08		259841		876.08		242653		876.08		250768		876.08		250119
875.08		260774		875.08		259212		875.08		245300		875.08		253112		875.08		245075
874.08		261048		874.08		262145		874.08		244856		874.08		252922		874.08		242606
873.08		264555		873.08		260334		873.08		246344		873.08		253413		873.08		252186
872.08		263724		872.08		258663		872.08		244120		872.08		249772		872.08		245707
871.08		264254		871.08		264248		871.08		247268		871.08		250941		871.08		247114
870.08		266602		870.08		264308		870.08		246763		870.08		253383		870.08		249653
869.08		266507		869.08		259081		869.08		247500		869.08		249595		869.08		245659
868.08		264722		868.08		265230		868.08		250213		868.08		256836		868.08		245576
867.08		269390		867.08		262352		867.08		245406		867.08		252322		867.08		251901
866.08		267666		866.08		267885		866.08		251480		866.08		259193		866.08		248576
865.08		270444		865.08		264135		865.08		250166		865.08		256771		865.08		248115
864.08		268981		864.08		260986		864.08		248040		864.08		253094		864.08		250037
863.08		270438		863.08		265949		863.08		248192		863.08		256323		863.08		252592
862.08		267074		862.08		266601		862.08		250063		862.08		257813		862.08		250346
861.08		274091		861.08		264779		861.08		254475		861.08		260406		861.08		248194
860.08		271145		860.08		270246		860.08		255347		860.08		254461		860.08		251548
859.08		271675		859.08		266636		859.08		253178		859.08		257158		859.08		252968
858.08		269133		858.08		269528		858.08		249846		858.08		257643		858.08		250511
857.08		274681		857.08		267162		857.08		255794		857.08		259246		857.08		254297
856.08		271441		856.08		270041		856.08		251942		856.08		257807		856.08		254323
855.08		275389		855.08		271387		855.08		251514		855.08		259181		855.08		253765
854.08		275656		854.08		267038		854.08		255010		854.08		263686		854.08		250950
853.08		272566		853.08		268065		853.08		255889		853.08		259873		853.08		255600
852.08		278498		852.08		272036		852.08		255711		852.08		261885		852.08		259076
851.08		275936		851.08		267541		851.08		255897		851.08		263503		851.08		259278
850.08		273855		850.08		277262		850.08		254508		850.08		260249		850.08		259943
849.08		276279		849.08		279023		849.08		258035		849.08		264879		849.08		258692
848.08		279964		848.08		274969		848.08		254341		848.08		266499		848.08		256909
847.08		278019		847.08		280155		847.08		255718		847.08		262350		847.08		260392
846.08		277201		846.08		270766		846.08		259872		846.08		263438		846.08		262825
845.08		281353		845.08		274407		845.08		260157		845.08		265285		845.08		259040
844.08		276871		844.08		276285		844.08		260729		844.08		266802		844.08		261591
843.08		282111		843.08		276811		843.08		260530		843.08		264458		843.08		259235
842.08		284337		842.08		278619		842.08		260160		842.08		265110		842.08		264617
841.08		285472		841.08		279583		841.08		260084		841.08		270276		841.08		259388
840.08		285554		840.08		280133		840.08		261920		840.08		268737		840.08		264129
839.08		286307		839.08		280900		839.08		259960		839.08		267221		839.08		261803
838.08		279918		838.08		282261		838.08		259355		838.08		266549		838.08		260172
837.08		285326		837.08		280733		837.08		263639		837.08		269253		837.08		262572
836.08		287011		836.08		285163		836.08		263997		836.08		272657		836.08		265352
835.08		285087		835.08		277401		835.08		263575		835.08		268310		835.08		263951
834.08		286468		834.08		279177		834.08		266471		834.08		267759		834.08		264905
833.08		289510		833.08		278455		833.08		264847		833.08		269130		833.08		266363
832.08		286514		832.08		284656		832.08		264215		832.08		272089		832.08		265064
831.08		290188		831.08		284330		831.08		266473		831.08		272560		831.08		269497
830.08		291429		830.08		281246		830.08		262364		830.08		273560		830.08		265679
829.08		287261		829.08		290316		829.08		268203		829.08		272095		829.08		266204
828.08		284656		828.08		283812		828.08		263553		828.08		273931		828.08		265894
827.08		290563		827.08		282811		827.08		266475		827.08		272407		827.08		273848
826.08		286196		826.08		284923		826.08		265775		826.08		273672		826.08		270793
825.08		285849		825.08		283950		825.08		266670		825.08		274737		825.08		271663
824.08		292599		824.08		284870		824.08		264815		824.08		275935		824.08		270564
823.08		295197		823.08		286507		823.08		268425		823.08		274148		823.08		272200
822.08		290566		822.08		286685		822.08		270061		822.08		271945		822.08		269503
821.08		290802		821.08		289931		821.08		269843		821.08		277996		821.08		269767
820.08		293146		820.08		286172		820.08		272479		820.08		279604		820.08		270480
819.08		294126		819.08		286179		819.08		268907		819.08		277904		819.08		270767
818.08		294825		818.08		291196		818.08		269888		818.08		280068		818.08		273170
817.08		292766		817.08		293553		817.08		273114		817.08		278033		817.08		272605
816.08		296203		816.08		290125		816.08		268956		816.08		277981		816.08		272822
815.08		296946		815.08		291325		815.08		273814		815.08		279993		815.08		276099
814.08		296725		814.08		292048		814.08		271728		814.08		278087		814.08		276953
813.08		295207		813.08		287641		813.08		269903		813.08		279092		813.08		274641
812.08		296946		812.08		290962		812.08		275915		812.08		281968		812.08		274913
811.08		294862		811.08		289562		811.08		272826		811.08		283699		811.08		277706
810.08		301333		810.08		293479		810.08		276637		810.08		281232		810.08		275291
809.08		302199		809.08		295188		809.08		275437		809.08		285543		809.08		278579
808.08		302241		808.08		295148		808.08		276467		808.08		285299		808.08		279605
807.08		306098		807.08		297138		807.08		278853		807.08		279074		807.08		281222
806.08		303469		806.08		297124		806.08		275370		806.08		282125		806.08		277746
805.08		300729		805.08		293910		805.08		276677		805.08		282179		805.08		276072
804.08		301821		804.08		296659		804.08		275690		804.08		283931		804.08		279711
803.08		303758		803.08		294232		803.08		275853		803.08		287313		803.08		283278
802.08		302164		802.08		295045		802.08		273440		802.08		286533		802.08		279987
801.08		303870		801.08		295568		801.08		275204		801.08		287080		801.08		277873
800.08		308188		800.08		295040		800.08		279465		800.08		289591		800.08		281498
799.08		304004		799.08		301222		799.08		278025		799.08		286580		799.08		283559
798.08		303243		798.08		297950		798.08		280860		798.08		289207		798.08		281833
797.08		306002		797.08		295948		797.08		280273		797.08		290036		797.08		283152
796.08		310445		796.08		307453		796.08		286229		796.08		286715		796.08		287071
795.08		320681		795.08		311856		795.08		292933		795.08		292957		795.08		287543
794.08		312640		794.08		302543		794.08		282599		794.08		292394		794.08		289038
793.08		310400		793.08		301563		793.08		279079		793.08		290466		793.08		283369
792.08		310920		792.08		300282		792.08		280268		792.08		292684		792.08		279516
791.08		307200		791.08		300836		791.08		280702		791.08		288226		791.08		284922
790.08		311485		790.08		301670		790.08		282311		790.08		292717		790.08		287135
789.08		309740		789.08		303646		789.08		279514		789.08		293042		789.08		286889
788.08		307321		788.08		306500		788.08		283788		788.08		295854		788.08		284159
787.08		310342		787.08		301088		787.08		282157		787.08		293216		787.08		287523
786.08		310783		786.08		304654		786.08		280257		786.08		293714		786.08		289429
785.08		311260		785.08		303472		785.08		282118		785.08		292213		785.08		283118
784.08		307733		784.08		307871		784.08		281743		784.08		301415		784.08		285282
783.08		314979		783.08		308555		783.08		284629		783.08		296300		783.08		289439
782.08		315447		782.08		307187		782.08		279686		782.08		297475		782.08		291098
781.08		318258		781.08		310774		781.08		291314		781.08		301684		781.08		296661
780.08		334064		780.08		322781		780.08		297320		780.08		302645		780.08		292467
779.08		328159		779.08		319086		779.08		298042		779.08		300525		779.08		289285
778.08		318715		778.08		308936		778.08		282320		778.08		298782		778.08		292920
777.08		315305		777.08		309142		777.08		281464		777.08		292099		777.08		289213
776.08		312456		776.08		307532		776.08		286510		776.08		297421		776.08		291692
775.08		312520		775.08		300891		775.08		284158		775.08		296087		775.08		294416
774.08		318096		774.08		311874		774.08		286685		774.08		295188		774.08		292896
773.08		312183		773.08		312776		773.08		285516		773.08		301512		773.08		294860
772.08		315997		772.08		310909		772.08		284735		772.08		296875		772.08		294658
771.08		315386		771.08		311745		771.08		284600		771.08		304391		771.08		296987
770.08		317102		770.08		307962		770.08		283794		770.08		299163		770.08		293880
769.08		315379		769.08		306874		769.08		288997		769.08		300807		769.08		294894
768.08		315382		768.08		309127		768.08		289651		768.08		304686		768.08		295982
767.08		317036		767.08		314929		767.08		287773		767.08		307504		767.08		297866
766.08		321329		766.08		314696		766.08		284759		766.08		300124		766.08		295318
765.08		320461		765.08		317354		765.08		289467		765.08		298289		765.08		297602
764.08		319447		764.08		311902		764.08		293117		764.08		303887		764.08		296480
763.08		323326		763.08		315660		763.08		292156		763.08		307153		763.08		299237
762.08		319998		762.08		316088		762.08		290230		762.08		304889		762.08		297622
761.08		323421		761.08		314059		761.08		294331		761.08		299543		761.08		296107
760.08		320622		760.08		319728		760.08		295322		760.08		306607		760.08		299935
759.08		323927		759.08		316136		759.08		291476		759.08		303344		759.08		302081
758.08		326922		758.08		315317		758.08		291695		758.08		304376		758.08		300499
757.08		324005		757.08		316955		757.08		294148		757.08		309614		757.08		302533
756.08		324706		756.08		320335		756.08		290623		756.08		306551		756.08		304452
755.08		330210		755.08		319875		755.08		293049		755.08		309195		755.08		302910
754.08		324748		754.08		317936		754.08		294172		754.08		310763		754.08		302502
753.08		327225		753.08		322190		753.08		296007		753.08		308589		753.08		304892
752.08		326832		752.08		323659		752.08		293137		752.08		309902		752.08		300904
751.08		328478		751.08		318839		751.08		297255		751.08		309795		751.08		304556
750.08		329104		750.08		324803		750.08		293308		750.08		313541		750.08		305740
749.08		332866		749.08		318121		749.08		299310		749.08		315639		749.08		306214
748.08		332466		748.08		325931		748.08		298843		748.08		311438		748.08		308174
747.08		329438		747.08		323722		747.08		297430		747.08		312975		747.08		307996
746.08		334108		746.08		322915		746.08		297599		746.08		312302		746.08		306466
745.08		330763		745.08		322325		745.08		296230		745.08		310843		745.08		309299
744.08		328102		744.08		319430		744.08		301525		744.08		316317		744.08		308490
743.08		333449		743.08		323731		743.08		296753		743.08		316516		743.08		309530
742.08		334094		742.08		324201		742.08		303335		742.08		311630		742.08		307452
741.08		331338		741.08		326716		741.08		300461		741.08		313099		741.08		305377
740.08		335480		740.08		328574		740.08		299789		740.08		319057		740.08		304534
739.08		333020		739.08		330346		739.08		301350		739.08		316454		739.08		310744
738.08		332799		738.08		326106		738.08		301867		738.08		313002		738.08		305543
737.08		333857		737.08		330036		737.08		302406		737.08		317976		737.08		311411
736.08		340159		736.08		333294		736.08		301977		736.08		316217		736.08		312907
735.08		341614		735.08		333606		735.08		305012		735.08		321224		735.08		311994
734.08		339119		734.08		331338		734.08		301370		734.08		319812		734.08		315602
733.08		338653		733.08		328758		733.08		304245		733.08		323180		733.08		312008
732.08		340677		732.08		331085		732.08		303055		732.08		317475		732.08		310241
731.08		338374		731.08		335238		731.08		304145		731.08		320640		731.08		313043
730.08		343424		730.08		334072		730.08		304526		730.08		321923		730.08		320707
729.08		337776		729.08		335154		729.08		300583		729.08		321610		729.08		317744
728.08		340883		728.08		332717		728.08		305338		728.08		324489		728.08		315788
727.08		340963		727.08		336796		727.08		311237		727.08		326362		727.08		315001
726.08		343860		726.08		336997		726.08		311992		726.08		325556		726.08		318610
725.08		344064		725.08		338424		725.08		308571		725.08		324426		725.08		319322
724.08		342864		724.08		334249		724.08		310543		724.08		324488		724.08		319285
723.08		343345		723.08		338067		723.08		307616		723.08		323215		723.08		316688
722.08		342883		722.08		338782		722.08		308017		722.08		328943		722.08		315432
721.08		344374		721.08		340891		721.08		309228		721.08		328427		721.08		320564
720.08		344067		720.08		340066		720.08		304661		720.08		325508		720.08		321907
719.08		344118		719.08		340044		719.08		309197		719.08		325912		719.08		321230
718.08		346381		718.08		336791		718.08		308191		718.08		331591		718.08		319481
717.08		345568		717.08		340859		717.08		310147		717.08		328819		717.08		321682
716.08		348364		716.08		342626		716.08		309443		716.08		327205		716.08		324386
715.08		344099		715.08		341037		715.08		309554		715.08		330792		715.08		323701
714.08		349072		714.08		339566		714.08		313577		714.08		330025		714.08		322265
713.08		354298		713.08		341963		713.08		312597		713.08		333226		713.08		321988
712.08		349039		712.08		347114		712.08		311616		712.08		329933		712.08		322327
711.08		353245		711.08		347754		711.08		314819		711.08		331313		711.08		327150
710.08		356113		710.08		340870		710.08		312612		710.08		334507		710.08		322663
709.08		348501		709.08		341111		709.08		310797		709.08		332327		709.08		327657
708.08		353076		708.08		345283		708.08		312403		708.08		331418		708.08		321481
707.08		352627		707.08		346091		707.08		309769		707.08		334178		707.08		324566
706.08		352857		706.08		340072		706.08		312106		706.08		333439		706.08		323493
705.08		355971		705.08		343852		705.08		311279		705.08		332558		705.08		327307
704.08		353847		704.08		344657		704.08		313234		704.08		334443		704.08		323977
703.08		357685		703.08		343708		703.08		314870		703.08		333056		703.08		328291
702.08		355876		702.08		342336		702.08		312056		702.08		336869		702.08		325710
701.08		355516		701.08		348142		701.08		315394		701.08		336975		701.08		328918
700.08		356360		700.08		342406		700.08		311997		700.08		336917		700.08		327928
699.08		353536		699.08		343405		699.08		318266		699.08		337252		699.08		327417
698.08		358718		698.08		343831		698.08		314352		698.08		331402		698.08		327846
697.08		359950		697.08		346052		697.08		311442		697.08		335834		697.08		328686
696.08		358932		696.08		345311		696.08		317436		696.08		340056		696.08		330754
695.08		361328		695.08		355846		695.08		318150		695.08		337270		695.08		334757
694.08		358678		694.08		352587		694.08		316782		694.08		343466		694.08		329431
693.08		355540		693.08		347791		693.08		316430		693.08		339029		693.08		330721
692.08		361364		692.08		348135		692.08		316219		692.08		344453		692.08		332157
691.08		360565		691.08		345731		691.08		319838		691.08		341798		691.08		330927
690.08		368706		690.08		348295		690.08		323146		690.08		347520		690.08		330796
689.08		366055		689.08		352820		689.08		316926		689.08		345125		689.08		333646
688.08		365584		688.08		352689		688.08		320270		688.08		344610		688.08		333610
687.08		363625		687.08		351544		687.08		319083		687.08		345715		687.08		337154
686.08		363766		686.08		353749		686.08		315437		686.08		341043		686.08		338512
685.08		358874		685.08		353847		685.08		321212		685.08		346412		685.08		336234
684.08		370847		684.08		356516		684.08		320256		684.08		344466		684.08		332751
683.08		367901		683.08		352820		683.08		319112		683.08		351068		683.08		333260
682.08		367694		682.08		358940		682.08		317726		682.08		340662		682.08		336951
681.08		369206		681.08		361957		681.08		323255		681.08		344877		681.08		336306
680.08		366418		680.08		357756		680.08		316858		680.08		349006		680.08		337675
679.08		366963		679.08		353521		679.08		319627		679.08		342613		679.08		336957
678.08		367845		678.08		358740		678.08		322699		678.08		344827		678.08		338006
677.08		368268		677.08		356906		677.08		321921		677.08		348867		677.08		341052
676.08		373934		676.08		356188		676.08		322263		676.08		345309		676.08		334908
675.08		373413		675.08		359285		675.08		321737		675.08		348891		675.08		335965
674.08		374426		674.08		357348		674.08		320002		674.08		349533		674.08		335236
673.08		367840		673.08		363769		673.08		326760		673.08		350261		673.08		338045
672.08		367759		672.08		359704		672.08		324074		672.08		351187		672.08		334529
671.08		373705		671.08		361511		671.08		328844		671.08		350933		671.08		340648
670.08		375091		670.08		360150		670.08		327613		670.08		349868		670.08		344496
669.08		374094		669.08		363769		669.08		323713		669.08		348543		669.08		342541
668.08		376589		668.08		362316		668.08		322631		668.08		353943		668.08		338334
667.08		375386		667.08		366997		667.08		327478		667.08		350141		667.08		342085
666.08		378247		666.08		360370		666.08		324019		666.08		352447		666.08		343635
665.08		374641		665.08		364097		665.08		327378		665.08		352056		665.08		340587
664.08		376701		664.08		361249		664.08		325567		664.08		355112		664.08		338503
663.08		380421		663.08		365000		663.08		325613		663.08		354189		663.08		344585
662.08		379422		662.08		365132		662.08		329280		662.08		353430		662.08		342059
661.08		380032		661.08		364097		661.08		324153		661.08		354143		661.08		341461
660.08		377685		660.08		361802		660.08		327018		660.08		351110		660.08		344274
659.08		377318		659.08		362725		659.08		329339		659.08		355984		659.08		345540
658.08		384380		658.08		364173		658.08		329151		658.08		356992		658.08		345203
657.08		377761		657.08		367896		657.08		331736		657.08		359209		657.08		345690
656.08		379654		656.08		370540		656.08		324378		656.08		358770		656.08		344208
655.08		384680		655.08		369679		655.08		327347		655.08		353069		655.08		347777
654.08		384396		654.08		369509		654.08		328027		654.08		355316		654.08		344815
653.08		383457		653.08		369411		653.08		330343		653.08		349180		653.08		349373
652.08		384277		652.08		367637		652.08		328944		652.08		356044		652.08		347303
651.08		383860		651.08		376464		651.08		327663		651.08		357423		651.08		349353
650.08		384170		650.08		370519		650.08		327943		650.08		360304		650.08		346195
649.08		384998		649.08		371090		649.08		332491		649.08		359054		649.08		350910
648.08		388796		648.08		370490		648.08		331036		648.08		360967		648.08		343153
647.08		385843		647.08		375555		647.08		335134		647.08		358135		647.08		349076
646.08		390979		646.08		373687		646.08		329668		646.08		365102		646.08		347038
645.08		386780		645.08		371417		645.08		330907		645.08		357885		645.08		345472
644.08		389311		644.08		373493		644.08		331304		644.08		358824		644.08		347488
643.08		387843		643.08		370493		643.08		330307		643.08		362042		643.08		349559
642.08		385675		642.08		377895		642.08		331877		642.08		359737		642.08		346293
641.08		389215		641.08		377325		641.08		328282		641.08		358799		641.08		350478
640.08		393073		640.08		379968		640.08		329639		640.08		364214		640.08		352075
639.08		386582		639.08		374892		639.08		333671		639.08		362040		639.08		343141
638.08		391512		638.08		376867		638.08		333362		638.08		358898		638.08		351519
637.08		394321		637.08		379551		637.08		332646		637.08		361748		637.08		350282
636.08		390450		636.08		375058		636.08		331620		636.08		362684		636.08		352468
635.08		391042		635.08		379723		635.08		332657		635.08		366201		635.08		345569
634.08		395359		634.08		381258		634.08		330590		634.08		363810		634.08		347525
633.08		393038		633.08		379243		633.08		330534		633.08		364650		633.08		352245
632.08		396211		632.08		375340		632.08		330878		632.08		363475		632.08		350439
631.08		396906		631.08		375292		631.08		334227		631.08		366911		631.08		352665
630.08		390740		630.08		382080		630.08		334062		630.08		364418		630.08		351775
629.08		392136		629.08		383199		629.08		328789		629.08		366239		629.08		346621
628.08		396972		628.08		377209		628.08		333514		628.08		365067		628.08		350097
627.08		397327		627.08		383286		627.08		336895		627.08		367711		627.08		349182
626.08		396772		626.08		381207		626.08		333741		626.08		367350		626.08		350173
625.08		398311		625.08		382239		625.08		333965		625.08		368975		625.08		347776
624.08		394471		624.08		384612		624.08		338083		624.08		365924		624.08		349134
623.08		400038		623.08		381675		623.08		333836		623.08		368814		623.08		345431
622.08		397566		622.08		381075		622.08		334119		622.08		369582		622.08		350193
621.08		396716		621.08		384846		621.08		332093		621.08		366693		621.08		350817
620.08		406637		620.08		383349		620.08		332414		620.08		371784		620.08		351847
619.08		398625		619.08		389946		619.08		329503		619.08		364749		619.08		354404
618.08		395910		618.08		383572		618.08		334312		618.08		367493		618.08		354844
617.08		399051		617.08		384621		617.08		337592		617.08		369025		617.08		351204
616.08		399704		616.08		382457		616.08		334498		616.08		373269		616.08		354059
615.08		402597		615.08		382248		615.08		333080		615.08		370121		615.08		352518
614.08		407217		614.08		385491		614.08		335647		614.08		367552		614.08		354423
613.08		402103		613.08		380377		613.08		334123		613.08		362937		613.08		351470
612.08		400167		612.08		388034		612.08		331586		612.08		370042		612.08		350232
611.08		406686		611.08		384550		611.08		331356		611.08		363395		611.08		346911
610.08		405357		610.08		386186		610.08		333049		610.08		368920		610.08		347139
609.08		403882		609.08		383178		609.08		328394		609.08		368056		609.08		353070
608.08		403173		608.08		384346		608.08		332623		608.08		365124		608.08		355349
607.08		400202		607.08		387269		607.08		330053		607.08		369767		607.08		353663
606.08		403470		606.08		385759		606.08		326964		606.08		364598		606.08		352023
605.08		405318		605.08		386905		605.08		328815		605.08		370558		605.08		352517
604.08		402627		604.08		384855		604.08		330330		604.08		369478		604.08		351346
603.08		401609		603.08		393065		603.08		330393		603.08		368137		603.08		352342
602.08		403649		602.08		389415		602.08		325968		602.08		367965		602.08		349387
601.08		405801		601.08		385804		601.08		330490		601.08		363555		601.08		348665
600.08		403160		600.08		389567		600.08		322943		600.08		365987		600.08		343592
599.08		406553		599.08		385140		599.08		327124		599.08		365486		599.08		342536
598.08		403501		598.08		386546		598.08		327557		598.08		364514		598.08		346262
597.08		403468		597.08		385536		597.08		331525		597.08		365643		597.08		347488
596.08		407371		596.08		385784		596.08		325872		596.08		368526		596.08		348152
595.08		415753		595.08		388133		595.08		326160		595.08		363575		595.08		345230
594.08		410346		594.08		390407		594.08		327749		594.08		363781		594.08		348924
593.08		405332		593.08		387974		593.08		327425		593.08		364086		593.08		347094
592.08		404268		592.08		388455		592.08		327891		592.08		368616		592.08		348790
591.08		409035		591.08		386080		591.08		326239		591.08		366577		591.08		348800
590.08		409670		590.08		394217		590.08		325872		590.08		367497		590.08		343984
589.08		408299		589.08		389485		589.08		326723		589.08		362426		589.08		346322
588.08		407592		588.08		395606		588.08		325348		588.08		363693		588.08		341013
587.08		404658		587.08		387451		587.08		326103		587.08		359552		587.08		345154
586.08		409599		586.08		388602		586.08		321923		586.08		366119		586.08		342912
585.08		408264		585.08		385800		585.08		321202		585.08		364197		585.08		339499
584.08		415719		584.08		390288		584.08		322000		584.08		361080		584.08		342925
583.08		410710		583.08		390864		583.08		323580		583.08		362120		583.08		341356
582.08		405766		582.08		390200		582.08		325461		582.08		362907		582.08		343594
581.08		407293		581.08		388547		581.08		322638		581.08		358252		581.08		346084
580.08		405576		580.08		389772		580.08		322024		580.08		360671		580.08		341260
579.08		415493		579.08		388412		579.08		327419		579.08		365272		579.08		346159
578.08		416056		578.08		392697		578.08		323010		578.08		360282		578.08		342878
577.08		411291		577.08		395263		577.08		322427		577.08		352137		577.08		338401
576.08		407837		576.08		384746		576.08		315549		576.08		355408		576.08		338696
575.08		404001		575.08		381408		575.08		316073		575.08		352201		575.08		331905
574.08		397047		574.08		374059		574.08		311990		574.08		346970		574.08		324522
573.08		394547		573.08		374538		573.08		313401		573.08		348026		573.08		324797
572.08		389373		572.08		375934		572.08		309247		572.08		344487		572.08		325842
571.08		391890		571.08		372646		571.08		309081		571.08		350379		571.08		323420
570.08		392571		570.08		374572		570.08		304341		570.08		346713		570.08		325731
569.08		394959		569.08		375538		569.08		305779		569.08		341939		569.08		323984
568.08		408433		568.08		378630		568.08		306150		568.08		348835		568.08		328085
567.08		412887		567.08		389042		567.08		307634		567.08		356069		567.08		332731
566.08		423297		566.08		395103		566.08		319305		566.08		362519		566.08		337725
565.08		432768		565.08		409983		565.08		319695		565.08		363663		565.08		342494
564.08		431441		564.08		405764		564.08		319827		564.08		363865		564.08		336801
563.08		421238		563.08		386015		563.08		311720		563.08		347590		563.08		328042
562.08		403151		562.08		378815		562.08		303328		562.08		342975		562.08		324123
561.08		395739		561.08		366901		561.08		300684		561.08		343863		561.08		317919
560.08		390432		560.08		359932		560.08		298514		560.08		336994		560.08		312996
559.08		384327		559.08		361883		559.08		300232		559.08		330721		559.08		311563
558.08		379298		558.08		359010		558.08		302622		558.08		332311		558.08		313023
557.08		378032		557.08		357950		557.08		301840		557.08		326651		557.08		311605
556.08		380744		556.08		357615		556.08		301580		556.08		327741		556.08		313066
555.08		376070		555.08		359138		555.08		295863		555.08		330211		555.08		309458
554.08		375655		554.08		350335		554.08		301413		554.08		329800		554.08		311955
553.08		371160		553.08		352627		553.08		298878		553.08		327997		553.08		305530
552.08		364059		552.08		348542		552.08		291486		552.08		321895		552.08		300140
551.08		360659		551.08		346556		551.08		285990		551.08		317196		551.08		306168
550.08		355721		550.08		340160		550.08		277301		550.08		311496		550.08		296984
549.08		357750		549.08		334502		549.08		273691		549.08		307214		549.08		292559
548.08		352574		548.08		336187		548.08		273302		548.08		308031		548.08		286309
547.08		353027		547.08		334554		547.08		271476		547.08		306356		547.08		285562
546.08		353037		546.08		326514		546.08		268903		546.08		304630		546.08		286061
545.08		348044		545.08		322522		545.08		265306		545.08		296018		545.08		280833
544.08		340720		544.08		317883		544.08		254665		544.08		295102		544.08		273827
543.08		338111		543.08		315387		543.08		247738		543.08		288051		543.08		269015
542.08		325851		542.08		313092		542.08		243643		542.08		280698		542.08		263840
541.08		322511		541.08		297978		541.08		234636		541.08		277010		541.08		254987
540.08		304469		540.08		290197		540.08		233412		540.08		264110		540.08		252805
539.08		295530		539.08		282024		539.08		227311		539.08		257650		539.08		242447
538.08		292256		538.08		272733		538.08		224007		538.08		253179		538.08		239333
537.08		290330		537.08		274009		537.08		221057		537.08		252996		537.08		238246
536.08		285793		536.08		269140		536.08		216370		536.08		247959		536.08		237376
535.08		292845		535.08		270300		535.08		219718		535.08		253331		535.08		234196
534.08		310810		534.08		305773		534.08		249316		534.08		285255		534.08		267334
533.08		403524		533.08		404042		533.08		344454		533.08		373073		533.08		340207
532.08		558440		532.08		557745		532.08		528616		532.08		499828		532.08		471727
531.08		724102		531.08		708841		531.08		645206		531.08		604535		531.08		572695
530.08		872768		530.08		780304		530.08		535736		530.08		600989		530.08		541865
529.08		607866		529.08		484301		529.08		309752		529.08		378967		529.08		339671
528.08		311571		528.08		268607		528.08		209433		528.08		246561		528.08		224241
527.08		262620		527.08		238901		527.08		189464		527.08		224523		527.08		209612
526.08		248581		526.08		229389		526.08		183412		526.08		218228		526.08		201395
525.08		241587		525.08		230957		525.08		182532		525.08		216069		525.08		203389
524.08		247692		524.08		229996		524.08		178435		524.08		215358		524.08		200983
523.08		242279		523.08		226008		523.08		179383		523.08		213657		523.08		199090
522.08		238673		522.08		223841		522.08		174978		522.08		212157		522.08		196746
521.08		239796		521.08		223148		521.08		176445		521.08		206902		521.08		196004
520.08		241342		520.08		224852		520.08		179761		520.08		209526		520.08		192057
519.08		236920		519.08		220938		519.08		177397		519.08		211207		519.08		200011
518.08		238851		518.08		220683		518.08		175943		518.08		209605		518.08		194143
517.08		235586		517.08		220135		517.08		174734		517.08		209450		517.08		195752
516.08		234663		516.08		218143		516.08		171548		516.08		207988		516.08		194253
515.08		238034		515.08		218854		515.08		172400		515.08		206390		515.08		194462
514.08		236195		514.08		222483		514.08		172647		514.08		208725		514.08		191220
513.08		237472		513.08		217945		513.08		170569		513.08		206372		513.08		194123
512.08		237797		512.08		221300		512.08		173813		512.08		205620		512.08		192234
511.08		238492		511.08		222038		511.08		170300		511.08		207160		511.08		187661
510.08		235904		510.08		220889		510.08		170617		510.08		205241		510.08		190020
509.08		240848		509.08		217224		509.08		169355		509.08		200837		509.08		189472
508.08		237433		508.08		217862		508.08		169943		508.08		204324		508.08		187845
507.08		237472		507.08		215257		507.08		170294		507.08		199890		507.08		185357
506.08		235808		506.08		217073		506.08		167680		506.08		203315		506.08		184189
505.08		234582		505.08		214870		505.08		165855		505.08		196539		505.08		185177
504.08		233705		504.08		217224		504.08		163273		504.08		202060		504.08		186330
503.08		228943		503.08		215747		503.08		161849		503.08		199779		503.08		181786
502.08		231714		502.08		211091		502.08		163738		502.08		194601		502.08		180052
501.08		230121		501.08		211180		501.08		163238		501.08		193844		501.08		181883
500.08		228944		500.08		208928		500.08		160567		500.08		192272		500.08		174935
499.08		228198		499.08		209973		499.08		159802		499.08		191934		499.08		175621
498.08		227288		498.08		210532		498.08		160411		498.08		193750		498.08		174835
497.08		225216		497.08		208488		497.08		157609		497.08		189090		497.08		175297
496.08		224423		496.08		207870		496.08		160907		496.08		190270		496.08		172140
495.08		229907		495.08		211252		495.08		156624		495.08		189423		495.08		176144
494.08		225745		494.08		208997		494.08		152679		494.08		185602		494.08		172470
493.08		219998		493.08		205204		493.08		156025		493.08		185563		493.08		169893
492.08		221757		492.08		203275		492.08		153963		492.08		185653		492.08		170696
491.08		220665		491.08		208211		491.08		152913		491.08		183141		491.08		171533
490.08		223592		490.08		208046		490.08		153381		490.08		187189		490.08		171050
489.08		223202		489.08		210003		489.08		151067		489.08		183326		489.08		170434
488.08		223095		488.08		206081		488.08		153774		488.08		183197		488.08		167863
487.08		227298		487.08		207861		487.08		150736		487.08		183482		487.08		169917
486.08		223782		486.08		203616		486.08		148510		486.08		180887		486.08		168028
485.08		226097		485.08		204832		485.08		149099		485.08		184153		485.08		167771
484.08		223148		484.08		207444		484.08		148498		484.08		182006		484.08		164990
483.08		221509		483.08		204970		483.08		146916		483.08		177643		483.08		163679
482.08		218500		482.08		202790		482.08		143581		482.08		175855		482.08		161794
481.08		218884		481.08		200500		481.08		145838		481.08		177030		481.08		159490
480.08		216302		480.08		197263		480.08		142005		480.08		175079		480.08		158587
479.08		216894		479.08		200740		479.08		140784		479.08		172980		479.08		156618
478.08		221582		478.08		200997		478.08		141834		478.08		173356		478.08		155526
477.08		224558		477.08		199695		477.08		137476		477.08		167576		477.08		154939
476.08		210997		476.08		190588		476.08		132736		476.08		164177		476.08		146449
475.08		202904		475.08		184572		475.08		131172		475.08		155044		475.08		142863
474.08		195573		474.08		177437		474.08		125017		474.08		153783		474.08		136197
473.08		201577		473.08		183677		473.08		126656		473.08		155556		473.08		136840
472.08		204645		472.08		190971		472.08		128284		472.08		157177		472.08		139428
471.08		205231		471.08		180256		471.08		122652		471.08		149830		471.08		133987
470.08		180289		470.08		161390		470.08		113182		470.08		134879		470.08		122949
469.08		163379		469.08		145704		469.08		107049		469.08		126104		469.08		110170
468.08		154143		468.08		141244		468.08		102223		468.08		117970		468.08		105447
467.08		154618		467.08		137303		467.08		103591		467.08		121159		467.08		111035
466.08		173745		466.08		163455		466.08		115618		466.08		140080		466.08		119514
465.08		240193		465.08		194248		465.08		146815		465.08		181608		465.08		157109
464.08		285440		464.08		226722		464.08		182772		464.08		197041		464.08		169219
463.08		230968		463.08		197410		463.08		126844		463.08		154740		463.08		136252
462.08		171335		462.08		149504		462.08		105118		462.08		122654		462.08		108939
461.08		152506		461.08		144079		461.08		104118		461.08		119717		461.08		108429
460.08		181667		460.08		182084		460.08		127336		460.08		151050		460.08		135262
459.08		373708		459.08		277574		459.08		231838		459.08		306582		459.08		257261
458.08		510797		458.08		323410		458.08		282852		458.08		300678		458.08		257296
457.08		213088		457.08		163951		457.08		106063		457.08		125259		457.08		113266
456.08		106021		456.08		90864.7		456.08		76840.9		456.08		81232.9		456.08		74783.7
455.08		89114.9		455.08		78528.2		455.08		70646.2		455.08		75190.2		455.08		72079.2
454.08		83688.8		454.08		73597.7		454.08		66686.3		454.08		69587.1		454.08		69621.6
453.08		72019.1		453.08		60651.7		453.08		62332		453.08		62329.4		453.08		62140.6
452.08		60731.6		452.08		58172.1		452.08		60389.5		452.08		58899.6		452.08		58550.9
451.08		58696.9		451.08		56412.7		451.08		58515		451.08		54972.1		451.08		55841.7
450.08		55923.6		450.08		56698.1		450.08		61566.4		450.08		56070.2		450.08		55677.4
449.08		56240.7		449.08		56124.3		449.08		60660.5		449.08		55673.1		449.08		56347.5
448.08		57681.1		448.08		55914.1		448.08		59045.7		448.08		56085.6		448.08		54026.6
447.08		57532.2		447.08		55798.1		447.08		60725.7		447.08		55128.9		447.08		56362.4
446.08		58106.9		446.08		55723.2		446.08		61642.4		446.08		54881.9		446.08		55993.8
445.08		58085		445.08		56026.8		445.08		62651.5		445.08		54954.3		445.08		55476
444.08		56123		444.08		55702.6		444.08		61714.6		444.08		55356.9		444.08		56999.3
443.08		57831.3		443.08		55919.2		443.08		59113		443.08		57473.4		443.08		56362.6
442.08		58844.5		442.08		57293.2		442.08		61083.6		442.08		57366		442.08		56327.9
441.08		60544.5		441.08		57767.9		441.08		62277.3		441.08		55201.2		441.08		58846.4
440.08		59613.2		440.08		56038		440.08		62561.1		440.08		57305.8		440.08		56746.8
439.08		63216.9		439.08		58239.9		439.08		62512.4		439.08		56140.2		439.08		56978.7
438.08		62662.3		438.08		57810.9		438.08		62587.2		438.08		57246.3		438.08		60800.5
437.08		61343		437.08		57475.3		437.08		62634.1		437.08		57965.6		437.08		57401.7
436.08		59111		436.08		56256.8		436.08		61190.7		436.08		59335		436.08		57755.8
435.08		59008.5		435.08		56695.9		435.08		63392.6		435.08		56936.5		435.08		57149.3
434.08		56200.5		434.08		57293.3		434.08		62564.3		434.08		58163.5		434.08		58183.2
433.08		56217.3		433.08		55290		433.08		64358.9		433.08		58208		433.08		56401.4
432.08		56196.4		432.08		57436.9		432.08		63028.3		432.08		59092.9		432.08		57982.3
431.08		57975.7		431.08		58274.6		431.08		63004.8		431.08		57024.5		431.08		58617.4
430.08		56243.2		430.08		55238		430.08		62547.1		430.08		59032.1		430.08		58306.4
429.08		57868.4		429.08		56268.8		429.08		62917.1		429.08		57972.4		429.08		58192.7
428.08		57305.7		428.08		58392.2		428.08		64211.6		428.08		58141.4		428.08		58986.3
427.08		59411.6		427.08		56623.5		427.08		64975.3		427.08		60966.3		427.08		59218.9
426.08		59424		426.08		56451.6		426.08		64695		426.08		59073.4		426.08		59782.6
425.08		57844.5		425.08		59163		425.08		64041.1		425.08		60877.8		425.08		59933.5
424.08		59310.3		424.08		58343.6		424.08		65370.7		424.08		59614.1		424.08		60063.4
423.08		57903.8		423.08		55934.1		423.08		64516.5		423.08		58324.4		423.08		60084
422.08		60869.1		422.08		60670.2		422.08		64350.1		422.08		59404.2		422.08		61111.7
421.08		59116.3		421.08		57143.6		421.08		64638.2		421.08		61323.1		421.08		60273.2
420.08		56188.3		420.08		57616.6		420.08		63313.8		420.08		60313.8		420.08		61017.2
419.08		55510		419.08		58261.9		419.08		64478.9		419.08		58014.2		419.08		60129.7
418.08		58610.7		418.08		58375		418.08		63764.3		418.08		58113.1		418.08		60910.3
417.08		59646.9		417.08		56423.8		417.08		62933.1		417.08		60658		417.08		57748.4
416.08		56877.6		416.08		57115.4		416.08		62519		416.08		58931.9		416.08		59340.3
415.08		59220.4		415.08		56689.6		415.08		61234.6		415.08		59356.5		415.08		60250.1
414.08		58170.1		414.08		59555.1		414.08		62082.2		414.08		59491		414.08		59687.3
413.08		58016.3		413.08		56345.7		413.08		64678.6		413.08		58531.3		413.08		59483.1
412.08		58422.4		412.08		55403.8		412.08		62930.8		412.08		58435.1		412.08		58249.2
411.08		58754		411.08		57395		411.08		59213.5		411.08		56151.4		411.08		56803.9
410.08		57551.2		410.08		56023.1		410.08		61515.9		410.08		55885.2		410.08		56776.4
409.08		57653.2		409.08		55717.6		409.08		63696.5		409.08		57418.6		409.08		56880
408.08		58066.8		408.08		56008.5		408.08		63033.6		408.08		58805.3		408.08		57904.3
407.08		60660.1		407.08		59385.5		407.08		66313.4		407.08		59119.1		407.08		60344.6
406.08		61240.1		406.08		56141.6		406.08		65459		406.08		57802.4		406.08		58450.1
405.08		58076.5		405.08		54392.4		405.08		60297.5		405.08		56728.9		405.08		55125.4
404.08		57459.1		404.08		54914.2		404.08		58935.6		404.08		54564.1		404.08		54160.8
403.08		58830.1		403.08		59013.4		403.08		63234.4		403.08		57201		403.08		56809.8
402.08		62646.8		402.08		64329.1		402.08		74357		402.08		66490.3		402.08		67063.3
401.08		61448		401.08		79231.7		401.08		105147		401.08		92939.6		401.08		87022
400.08		59664.6		400.08		102949		400.08		169485		400.08		160892		400.08		144429
399.08		58578.5		399.08		94589.1		399.08		140657		399.08		115201		399.08		124836
398.08		59213.1		398.08		63977.2		398.08		73256.5		398.08		68923.7		398.08		68760.8
397.08		59732.3		397.08		56741.8		397.08		60829.1		397.08		58648.9		397.08		56451
396.08		57036.9		396.08		55671.9		396.08		57377.7		396.08		56092.9		396.08		57138.5
395.08		57399.2		395.08		55345.6		395.08		60402.7		395.08		53924.4		395.08		53362.5
394.08		57713		394.08		54908.1		394.08		58798.6		394.08		54670.9		394.08		53930.3
393.08		56998.4		393.08		55418.4		393.08		57688.5		393.08		54626		393.08		55564.6
392.08		56347.4		392.08		54894.6		392.08		57513		392.08		54717.9		392.08		54091.2
391.08		57079.6		391.08		53840.7		391.08		58721.5		391.08		54414.6		391.08		53916.9
390.08		57729.8		390.08		54741.3		390.08		58881.2		390.08		55891		390.08		56038.9
389.08		57119.3		389.08		54385.3		389.08		59389.1		389.08		54915.7		389.08		54767.1
388.08		58437.8		388.08		55731		388.08		60165.5		388.08		52326.2		388.08		54675.8
387.08		60717.4		387.08		55956		387.08		59745.3		387.08		54729.2		387.08		56181.9
386.08		59571.6		386.08		56759.6		386.08		58942.4		386.08		55583.4		386.08		56512.6
385.08		58511.1		385.08		57424		385.08		59067.3		385.08		57254.5		385.08		56220.4
384.08		57733.9		384.08		55378.6		384.08		59949.4		384.08		57041.1		384.08		55353.2
383.08		60238.4		383.08		56960.9		383.08		60836		383.08		55945.6		383.08		55763.3
382.08		61111.3		382.08		55508		382.08		61521.1		382.08		56949.5		382.08		55226
381.08		59192.9		381.08		56951.6		381.08		59445.9		381.08		56717.9		381.08		55286.7
380.08		58742		380.08		57110.8		380.08		60217.7		380.08		56409.6		380.08		59811.1
379.08		59396.6		379.08		57947.2		379.08		60682.4		379.08		57249.3		379.08		57448
378.08		60008.3		378.08		59080.3		378.08		62293.7		378.08		56030.2		378.08		57197.3
377.08		60754		377.08		57802.7		377.08		62878.1		377.08		57762.5		377.08		57761.8
376.08		59989.8		376.08		58428.7		376.08		61558.6		376.08		57688.2		376.08		58721.7
375.08		59698.7		375.08		57980.3		375.08		64598.7		375.08		60128		375.08		57140.4
374.08		59706		374.08		57993.5		374.08		64101.7		374.08		59657.8		374.08		57278
373.08		59923.9		373.08		57272.3		373.08		62300.1		373.08		61055.4		373.08		57878.9
372.08		61834.9		372.08		57913.1		372.08		61680.9		372.08		57852		372.08		59502.2
371.08		62394.1		371.08		58918.7		371.08		63509.8		371.08		57935.2		371.08		58909
370.08		61890		370.08		59668.4		370.08		64472.4		370.08		60208.5		370.08		59835.8
369.08		59977.9		369.08		58733.5		369.08		63821.2		369.08		59859.7		369.08		58767.1
368.08		61235		368.08		61155.7		368.08		63750.7		368.08		59397.8		368.08		61691.4
367.08		61524.3		367.08		59369		367.08		61370.1		367.08		59768.9		367.08		60904.7
366.08		61865.9		366.08		59247.9		366.08		63465.7		366.08		59813.6		366.08		59647.7
365.08		63968.1		365.08		60343		365.08		63109.7		365.08		59264.5		365.08		59421.8
364.08		61082.8		364.08		60841.4		364.08		64468.7		364.08		60985.5		364.08		61182.3
363.08		64417.1		363.08		59032.8		363.08		63512.1		363.08		58514.7		363.08		62482.8
362.08		62337.2		362.08		59314.9		362.08		65214.6		362.08		59757.7		362.08		62129.9
361.08		60943.2		361.08		62167.1		361.08		63669		361.08		60901.5		361.08		62185.7
360.08		64243.7		360.08		62812.4		360.08		64932.3		360.08		60739.5		360.08		63148.8
359.08		62115.8		359.08		60653		359.08		65683.1		359.08		60475		359.08		63360.7
358.08		64491.3		358.08		59290.6		358.08		66090.4		358.08		60776.2		358.08		63171.1
357.08		64564.5		357.08		61708.7		357.08		66975.9		357.08		61347.3		357.08		62226.2
356.08		65577.6		356.08		63828.4		356.08		66402.6		356.08		62359		356.08		65587.3
355.08		63528.5		355.08		62868.1		355.08		67410.4		355.08		62958.7		355.08		63023.1
354.08		62914.1		354.08		59500		354.08		67720.2		354.08		62628.3		354.08		61794.4
353.08		64899.3		353.08		63867.9		353.08		66108.6		353.08		60650		353.08		64705.3
352.08		65536.5		352.08		67403.5		352.08		69789.9		352.08		62710.5		352.08		65703.2
351.08		67169.3		351.08		67730.4		351.08		72888.3		351.08		63675.7		351.08		66338.1
350.08		65556.9		350.08		65891.3		350.08		72981.6		350.08		65152.4		350.08		65700.5
349.08		60719.7		349.08		66798		349.08		68258.8		349.08		61670.3		349.08		64138.2
348.08		63385.9		348.08		67862.6		348.08		73001.1		348.08		64938.2		348.08		69268.2
347.08		66577		347.08		72270.4		347.08		77006		347.08		68996		347.08		68367
346.08		64892.9		346.08		70006.1		346.08		73386		346.08		68347.3		346.08		66622.4
345.08		62059		345.08		65753.6		345.08		69223.1		345.08		66459.2		345.08		68582.6
344.08		62993.2		344.08		65207.7		344.08		71543.4		344.08		66774.6		344.08		68375.5
343.08		64559.5		343.08		65623.9		343.08		69581.4		343.08		67251		343.08		68195.7
342.08		64414.1		342.08		63329.3		342.08		71727.2		342.08		67806.4		342.08		68742.3
341.08		65621		341.08		67640.5		341.08		71645.7		341.08		66444.9		341.08		68796.5
340.08		66559.6		340.08		65997.6		340.08		70634.7		340.08		66941.4		340.08		70649.8
339.08		65608.9		339.08		68515.6		339.08		73339.3		339.08		67159.5		339.08		67479.2
338.08		64365.5		338.08		66383.2		338.08		72010.8		338.08		67505.9		338.08		70471.2
337.08		65997.9		337.08		69292.4		337.08		71396.5		337.08		69711.5		337.08		70758.7
336.08		67137.4		336.08		64078.5		336.08		71466.4		336.08		70496.9		336.08		72493
335.08		67003.5		335.08		67545.5		335.08		71857.1		335.08		69653.3		335.08		72591.9
334.08		66926.8		334.08		66616.9		334.08		73840.5		334.08		68853.7		334.08		71581
333.08		68671.1		333.08		69034.1		333.08		74867.5		333.08		69353.4		333.08		70614.7
332.08		67433.1		332.08		68147.9		332.08		74958.5		332.08		71438.9		332.08		72761.1
331.08		70945.2		331.08		68433.1		331.08		72157.9		331.08		70390.3		331.08		73249.9
330.08		66512.3		330.08		69236		330.08		74582.4		330.08		72376.1		330.08		73233.8
329.08		67893.4		329.08		68840.7		329.08		75599.4		329.08		71121.9		329.08		73058.1
328.08		70403.1		328.08		70877.2		328.08		75142.2		328.08		73902.7		328.08		74514.5
327.08		69383.7		327.08		68470.5		327.08		77216.3		327.08		71944.4		327.08		74344
326.08		70339.8		326.08		68520.2		326.08		79778.4		326.08		73378.8		326.08		74154.8
325.08		71489.6		325.08		72782.6		325.08		78896.3		325.08		75073.5		325.08		72568.8
324.08		70792.3		324.08		71986.1		324.08		78820.4		324.08		72575.3		324.08		75737
323.08		72567		323.08		71584.5		323.08		79489.1		323.08		76283.9		323.08		78469.4
322.08		73430.2		322.08		72360.5		322.08		80115.5		322.08		77984.2		322.08		78416
321.08		72545		321.08		73947.8		321.08		79788.7		321.08		75806.6		321.08		77165.3
320.08		74176.4		320.08		74123.9		320.08		80583.8		320.08		77374.9		320.08		78406.8
319.08		76009.5		319.08		74916.3		319.08		82082.9		319.08		78558.9		319.08		79674.8
318.08		75046.4		318.08		74641.2		318.08		83043.5		318.08		78418.7		318.08		79046.9
317.08		76642.3		317.08		76251.5		317.08		82248.8		317.08		78933.7		317.08		80916
316.08		77175.9		316.08		75902.6		316.08		82160.8		316.08		80547.2		316.08		81931.5
315.08		75513.6		315.08		76460.8		315.08		83830.7		315.08		81120.3		315.08		82888.4
314.08		78503.2		314.08		77482.6		314.08		84700.2		314.08		82654		314.08		84252
313.08		77349		313.08		77480.8		313.08		85714.3		313.08		80985.4		313.08		84868.7
312.08		75648.1		312.08		77837.6		312.08		85067.3		312.08		80880.1		312.08		83415.8
311.08		77056.5		311.08		79194.2		311.08		87239.2		311.08		82776.2		311.08		85061.1
310.08		77770.5		310.08		79715.7		310.08		88414.4		310.08		83541.5		310.08		84623.6
309.08		78734.3		309.08		77276.3		309.08		88069.8		309.08		84184.5		309.08		84388.3
308.08		79229		308.08		77430.9		308.08		88820.5		308.08		81992.8		308.08		89572.7
307.08		80258.3		307.08		78847		307.08		90531.8		307.08		82260		307.08		85126.5
306.08		79690.1		306.08		79499.1		306.08		88221.2		306.08		85402.9		306.08		86028.2
305.08		80138.9		305.08		78536		305.08		87351.3		305.08		83067.4		305.08		85703.6
304.08		77940.6		304.08		80636.1		304.08		85982.8		304.08		83707.9		304.08		84446.8
303.08		78928.2		303.08		78545.5		303.08		81907.5		303.08		80853.1		303.08		85194.6
302.08		76903.5		302.08		78143.2		302.08		79843.5		302.08		79664.3		302.08		82244.2
301.08		76026		301.08		75206		301.08		79174.2		301.08		77418.7		301.08		81399.4
300.08		73463		300.08		73746.3		300.08		77096.9		300.08		76238.4		300.08		77680.6
299.08		73145.5		299.08		72060.6		299.08		76942.3		299.08		74455.4		299.08		74352.5
298.08		70587.2		298.08		70853.6		298.08		73993.5		298.08		72648.3		298.08		74274
297.08		71481.3		297.08		67714.1		297.08		70561.8		297.08		69196.3		297.08		71866.7
296.08		69903.3		296.08		68876.7		296.08		70918.2		296.08		69671.8		296.08		68465.9
295.08		65278.1		295.08		66764.2		295.08		70362.2		295.08		67269.1		295.08		65748
294.08		64753.7		294.08		64879		294.08		68142.8		294.08		65715.3		294.08		65422.4
293.08		66298.1		293.08		65371.1		293.08		68458.9		293.08		66339.4		293.08		63337.3
292.08		63451.1		292.08		64569		292.08		67678		292.08		65742.6		292.08		65160.2
291.08		67448.2		291.08		64545.5		291.08		70736.9		291.08		70250		291.08		64947.5
290.08		69613.9		290.08		70097.8		290.08		75326.7		290.08		73258.6		290.08		71570.8
289.08		85963.6		289.08		94040.4		289.08		99438.8		289.08		100092		289.08		93953.2
288.08		115004		288.08		118113		288.08		146835		288.08		131785		288.08		132991
287.08		126097		287.08		130469		287.08		164881		287.08		150593		287.08		152290
286.08		176960		286.08		199839		286.08		240951		286.08		227390		286.08		225483
285.08		295822		285.08		323637		285.08		348315		285.08		371904		285.08		371592
284.08		300420		284.08		291649		284.08		299574		284.08		299405		284.08		325058
283.08		120886		283.08		110203		283.08		116918		283.08		106339		283.08		118067
282.08		69877.2		282.08		65000.2		282.08		64302.6		282.08		66296.1		282.08		63717.5
281.08		61956.2		281.08		58548.2		281.08		56386.4		281.08		55416.4		281.08		55516.4
280.08		57060.7		280.08		54109.1		280.08		54979.2		280.08		55573.9		280.08		54499.9
279.08		56183.3		279.08		54667.9		279.08		55626.1		279.08		51930.8		279.08		52256.8
278.08		56056.2		278.08		53257.2		278.08		52150.6		278.08		52417.1		278.08		52506.2
277.08		54551.7		277.08		52861.1		277.08		49525.5		277.08		52031.5		277.08		53662.5
276.08		53463.7		276.08		52921.3		276.08		51383.3		276.08		50803		276.08		50821.5
275.08		56308.3		275.08		55224.4		275.08		52072.2		275.08		51104.6		275.08		51566.5
274.08		55296		274.08		52067.7		274.08		51192.3		274.08		52018		274.08		50827.3
273.08		55115.5		273.08		51817.5		273.08		51975.1		273.08		52417.7		273.08		49740.4
272.08		55989.9		272.08		52833.4		272.08		52941.4		272.08		52568.8		272.08		51738.1
271.08		56847.5		271.08		54570.3		271.08		52238.6		271.08		51662.6		271.08		51420.7
270.08		57541.2		270.08		53595.6		270.08		51801		270.08		53595.3		270.08		49503.3
269.08		56322.2		269.08		53860.8		269.08		51953.4		269.08		51701.1		269.08		50731.2
268.08		54984.2		268.08		53469.1		268.08		53648.1		268.08		53013.5		268.08		50280.2
267.08		56547.4		267.08		54174.7		267.08		53189.7		267.08		52482.2		267.08		51942.8
266.08		56130.4		266.08		54301.6		266.08		51882.9		266.08		52505		266.08		52031
265.08		55057.2		265.08		53279.5		265.08		52400.4		265.08		52226.2		265.08		51960.9
264.08		53970.3		264.08		53244.2		264.08		53153.7		264.08		51692.5		264.08		51238.8
263.08		53652.8		263.08		52314.3		263.08		52275.2		263.08		51397.7		263.08		50341.5
262.08		57136.4		262.08		53518.7		262.08		51061.7		262.08		52221.4		262.08		51087.7
261.08		56435.5		261.08		54808.8		261.08		53146.6		261.08		53575.4		261.08		52939.7
260.08		56881.3		260.08		53865		260.08		51516.2		260.08		53678.4		260.08		51248.1
259.08		55568.4		259.08		52827.3		259.08		51053.9		259.08		53107.6		259.08		52561.9
258.08		56326.4		258.08		54096.6		258.08		51383.1		258.08		52232.9		258.08		51809.5
257.08		55570.5		257.08		55516.3		257.08		50719.4		257.08		51852.2		257.08		51672.6
256.08		55730.6		256.08		55011.7		256.08		52764.2		256.08		51850.7		256.08		51194.5
255.08		57487.7		255.08		54493.1		255.08		53168.4		255.08		51033.6		255.08		53150.9
254.08		54748.7		254.08		54987.7		254.08		52114.1		254.08		51886.6		254.08		52955.4
253.08		57446.7		253.08		54569.7		253.08		53081.5		253.08		53878		253.08		52543.1
252.08		57371.3		252.08		54421.2		252.08		53597.5		252.08		52536.2		252.08		51641.6
251.08		57107.9		251.08		52168		251.08		52758.1		251.08		52749.3		251.08		50397.7
250.08		55074.4		250.08		54086.3		250.08		51823.9		250.08		54027.3		250.08		52717.6
249.08		56696.6		249.08		55160.1		249.08		51450.9		249.08		53726.1		249.08		50703.9
248.08		56343.7		248.08		55404		248.08		54111.5		248.08		51782.8		248.08		51639
247.08		55714.2		247.08		54557.9		247.08		52908.9		247.08		54056.9		247.08		50773.2
246.08		55444.2		246.08		54710.6		246.08		51906.8		246.08		53703.5		246.08		51485
245.08		54386.4		245.08		54798.6		245.08		53273.5		245.08		53707.6		245.08		51111.8
244.08		56989.6		244.08		53756.7		244.08		52949		244.08		53314.8		244.08		52365
243.08		56311.1		243.08		55340.1		243.08		52802.2		243.08		53061.3		243.08		50274.8
242.08		57418.4		242.08		53865.2		242.08		54938.2		242.08		52948.3		242.08		50774.5
241.08		56684.3		241.08		54319.3		241.08		55494.2		241.08		54541.5		241.08		51458.9
240.08		56548.4		240.08		54882.4		240.08		54285.4		240.08		54668.7		240.08		51750.3
239.08		56914.4		239.08		55551.7		239.08		51871.2		239.08		52158.6		239.08		53489.1
238.08		58425.6		238.08		54173.4		238.08		54007.2		238.08		53152.7		238.08		52208.9
237.08		58115.6		237.08		54898.9		237.08		54774.7		237.08		53765.1		237.08		51560.7
236.08		57576.5		236.08		56366.1		236.08		55036.7		236.08		53383.2		236.08		52677.1
235.08		57479.8		235.08		54507.2		235.08		52574.1		235.08		54880.4		235.08		51612.6
234.08		56585.2		234.08		54852.7		234.08		53733.6		234.08		52600.1		234.08		52517.9
233.08		56685.8		233.08		55453.9		233.08		55541.6		233.08		52939.5		233.08		52275.6
232.08		59110.5		232.08		55107.7		232.08		54685.7		232.08		55214.4		232.08		52977.3
231.08		58781.7		231.08		54368.8		231.08		53383.2		231.08		53852.5		231.08		55003.4
230.08		59417.4		230.08		56186.8		230.08		54304.7		230.08		54074.2		230.08		53997.5
229.08		56768.5		229.08		55278.3		229.08		53744.1		229.08		53952.5		229.08		52210.5
228.08		58706.3		228.08		57060.8		228.08		55191.4		228.08		54657.7		228.08		52920.7
227.08		61399.5		227.08		54901.4		227.08		54708.8		227.08		53631.6		227.08		54008
226.08		59449.5		226.08		55411.9		226.08		56367.3		226.08		54793		226.08		55465.6
225.08		57118.5		225.08		54870.6		225.08		54543.1		225.08		53453.2		225.08		54234.6
224.08		55700.1		224.08		57856.7		224.08		55071.4		224.08		51969.7		224.08		53659.1
223.08		59367.9		223.08		54156.4		223.08		56344.2		223.08		53768.9		223.08		53177
222.08		57247.8		222.08		56005.3		222.08		54774.8		222.08		54369.6		222.08		53336.7
221.08		59363.5		221.08		56526.5		221.08		53274.4		221.08		52992.3		221.08		52887.1
220.08		60495.5		220.08		56815.3		220.08		54635.5		220.08		53946.5		220.08		53601.2
219.08		60103.6		219.08		55434.2		219.08		53610.4		219.08		54097.2		219.08		53312.4
218.08		56880.7		218.08		55964.1		218.08		54407.7		218.08		54510.7		218.08		54060.5
217.08		59305.5		217.08		58500.8		217.08		55625.1		217.08		54510.7		217.08		52213.7
216.08		58656.4		216.08		54845.3		216.08		55065.7		216.08		55696.9		216.08		52072.3
215.08		58451.9		215.08		57252.6		215.08		54816.6		215.08		53518.3		215.08		53144.8
214.08		58375.8		214.08		55079.5		214.08		56199.2		214.08		53455.2		214.08		54198.9
213.08		59263.5		213.08		56978.5		213.08		54680.3		213.08		52482.9		213.08		52852.1
212.08		59862.7		212.08		55379.9		212.08		53880.2		212.08		55780.5		212.08		53033.8
211.08		59207.9		211.08		54939.7		211.08		56690.6		211.08		54304.2		211.08		52955.4
210.08		59282.3		210.08		57012.5		210.08		55560.4		210.08		55511.5		210.08		53589
209.08		59531.8		209.08		57193.3		209.08		54035.7		209.08		55009.7		209.08		52179.8
208.08		60214		208.08		56763.1		208.08		53754.4		208.08		55662.9		208.08		52589.4
207.08		58436.5		207.08		57634.7		207.08		54734.7		207.08		55925		207.08		53515.4
206.08		58353.2		206.08		58478.8		206.08		54466.3		206.08		54046.2		206.08		53494.2
205.08		58598.7		205.08		55832.4		205.08		55400.6		205.08		54081.4		205.08		54548.2
204.08		60109		204.08		56957.6		204.08		53911.1		204.08		54578.2		204.08		53122.5
203.08		58831		203.08		55918.1		203.08		55120		203.08		54291.8		203.08		55913.8
202.08		58457		202.08		57249.4		202.08		54000.8		202.08		55431.6		202.08		53275.9
201.08		59716.5		201.08		59546.6		201.08		54470.7		201.08		55327.9		201.08		54631
200.08		61285.4		200.08		57961		200.08		54083.2		200.08		54211.8		200.08		55288.3
199.08		60747.5		199.08		56786.6		199.08		53824.6		199.08		53581.2		199.08		52879.6
198.08		60947		198.08		57105.7		198.08		53251.7		198.08		55640.1		198.08		54367.1
197.08		59603.6		197.08		56628.7		197.08		54353.6		197.08		55039.7		197.08		53689.9
196.08		58453		196.08		57941		196.08		55194.9		196.08		56522.4		196.08		53641.6
195.08		60102.8		195.08		57556		195.08		52911		195.08		53996.5		195.08		54515.7
194.08		58795.9		194.08		58093.3		194.08		55613.2		194.08		54870.4		194.08		52775.5
193.08		60518.5		193.08		56118.3		193.08		56090.4		193.08		55291.7		193.08		53627.9
192.08		60687.5		192.08		59358.9		192.08		61024.4		192.08		57109.2		192.08		54931.4
191.08		65670.7		191.08		62173		191.08		64362.1		191.08		57408.4		191.08		55120.6
190.08		63347.5		190.08		60207.5		190.08		64068.9		190.08		58511		190.08		54136.7
189.08		61964.8		189.08		59017.4		189.08		58328.6		189.08		57587.9		189.08		56429
188.08		59873		188.08		58987.4		188.08		56563.7		188.08		56425.8		188.08		55225.1
187.08		60772		187.08		57300.6		187.08		55913		187.08		57271.6		187.08		54046.5
186.08		57935.5		186.08		57658.1		186.08		54631.1		186.08		55434		186.08		52510.3
185.08		62728.5		185.08		56004.9		185.08		54889.6		185.08		55555.6		185.08		53839.4
184.08		60364.7		184.08		58381		184.08		54580.4		184.08		52743.7		184.08		53053.3
183.08		61475.6		183.08		58074		183.08		53396.8		183.08		54737.9		183.08		53660.2
182.08		59488.7		182.08		57078.6		182.08		53124.1		182.08		55523.3		182.08		53346.1
181.08		58736.8		181.08		56229.9		181.08		53580.5		181.08		53907.4		181.08		54666.5
180.08		59983		180.08		58927.8		180.08		53849.2		180.08		54379.1		180.08		55593.7
179.08		61471.8		179.08		58125.1		179.08		54856.1		179.08		56299.2		179.08		54458.6
178.08		65002.9		178.08		59229.9		178.08		56747.4		178.08		54630.6		178.08		54424.5
177.08		61701.7		177.08		57549.6		177.08		56573.8		177.08		55819		177.08		53443.9
176.08		58829.7		176.08		58620.5		176.08		52368.6		176.08		55144.5		176.08		55462.1
175.08		58979.5		175.08		56464.8		175.08		54244.3		175.08		54148.2		175.08		53347.2
174.08		59616.3		174.08		56919.4		174.08		54750		174.08		56077.6		174.08		54151.2
173.08		59154.5		173.08		59476.9		173.08		53931.2		173.08		57211.8		173.08		53819
172.08		60356.6		172.08		55862.3		172.08		54271.2		172.08		57488.1		172.08		51765.7
171.08		60724.8		171.08		55670.3		171.08		53743.9		171.08		55772.1		171.08		53947.6
170.08		61806.4		170.08		57526.6		170.08		53407.6		170.08		54048.9		170.08		52573.8
169.08		61271.4		169.08		58119.8		169.08		54229.7		169.08		53288.6		169.08		53728.9
168.08		62775.7		168.08		56642.1		168.08		53323.4		168.08		55251.7		168.08		57662.8
167.08		62160		167.08		57558.3		167.08		53432.6		167.08		57263.7		167.08		55485.6
166.08		60830.8		166.08		56514.4		166.08		54911.7		166.08		52412.2		166.08		54113.4
165.08		57822.3		165.08		57741.2		165.08		54611.2		165.08		55921.2		165.08		53636.9
164.08		61215.9		164.08		61971.4		164.08		54551		164.08		54913.3		164.08		56043.8
163.08		62285.7		163.08		61129.5		163.08		53049.4		163.08		55977.8		163.08		55543.1
162.08		58900.8		162.08		57462		162.08		54600.9		162.08		53673.5		162.08		54417.7
161.08		61895		161.08		57674.2		161.08		53016.7		161.08		54930.1		161.08		51943.7
160.08		59927.7		160.08		56174.9		160.08		52883.2		160.08		54218		160.08		52103.3
159.08		58521.9		159.08		57272.7		159.08		55690.5		159.08		54606.9		159.08		53527.3
158.08		59539.2		158.08		56215.7		158.08		52634.1		158.08		57126		158.08		55283.2
157.08		58755.4		157.08		56855.9		157.08		54340.1		157.08		57209.4		157.08		53481.6
156.08		61668.1		156.08		58276.9		156.08		55135.4		156.08		54634.2		156.08		55584
155.08		61480.3		155.08		60507.9		155.08		53703.5		155.08		56450.7		155.08		54078.9
154.08		63026.3		154.08		61319.8		154.08		57845.6		154.08		56308.2		154.08		55084.2
153.08		67233.9		153.08		61269.1		153.08		56814.8		153.08		58543.1		153.08		55211.1
152.08		65800.6		152.08		60556.6		152.08		54214		152.08		55154.4		152.08		55328.3
151.08		62642.9		151.08		59899.3		151.08		54601.5		151.08		55605.5		151.08		54007.1
150.08		61540.2		150.08		57054.5		150.08		53121.6		150.08		53487.8		150.08		53667.4
149.08		60291		149.08		56615.6		149.08		51471.3		149.08		52718.8		149.08		52264.1
148.08		59615.4		148.08		58837.2		148.08		52857		148.08		54805.7		148.08		53990.4
147.08		60044.2		147.08		55722.3		147.08		51316.5		147.08		53257.4		147.08		51550.1
146.08		58808.7		146.08		56986.6		146.08		53455.2		146.08		55159.4		146.08		53265.2
145.08		59550.6		145.08		56267		145.08		53307.4		145.08		55116.7		145.08		53600.8
144.08		60302.7		144.08		56817.6		144.08		50587.1		144.08		55216.2		144.08		54007.9
143.08		59304.7		143.08		57096.1		143.08		52865.4		143.08		55762.5		143.08		56124.1
142.08		61555.4		142.08		56580.7		142.08		51381.9		142.08		54693.2		142.08		52246.2
141.08		61861.4		141.08		59720		141.08		51039		141.08		53611.7		141.08		52660
140.08		60704.5		140.08		58386		140.08		50696		140.08		54393		140.08		53351.3
139.08		62311.2		139.08		59594.2		139.08		51892.1		139.08		56887.1		139.08		51988.5
138.08		62493		138.08		57951		138.08		50458.6		138.08		56948.1		138.08		54497.4
137.08		60812.8		137.08		56502.3		137.08		51819.1		137.08		55191.6		137.08		53458.3
136.08		60619.8		136.08		57411.9		136.08		51125.6		136.08		53131.9		136.08		53414
135.08		61135.3		135.08		59820.9		135.08		55177.3		135.08		56048.3		135.08		51882.6
134.08		65827		134.08		61630.6		134.08		65831.1		134.08		56225.7		134.08		56420.6
133.08		68548.8		133.08		60981.3		133.08		69812.4		133.08		59430.8		133.08		56275.9
132.08		63111.2		132.08		58094.2		132.08		58070.1		132.08		55166.2		132.08		54360.8
131.08		62267.6		131.08		56087.5		131.08		50049		131.08		54085.4		131.08		52441.2
130.08		60514.2		130.08		55797.3		130.08		51214.5		130.08		53677.2		130.08		52794.9
129.08		59300.5		129.08		57931.4		129.08		50558.7		129.08		54210.3		129.08		50941.9
128.08		58292.8		128.08		53599.1		128.08		50280		128.08		53472.6		128.08		52122.7
127.08		61245.5		127.08		55879.7		127.08		50958.5		127.08		52075.9		127.08		50152.3
126.08		58445		126.08		55778		126.08		51761.5		126.08		49846.2		126.08		50559.8
125.08		59497.9		125.08		55295.1		125.08		48729.8		125.08		52755.9		125.08		50567.8
124.08		59182.7		124.08		55989.9		124.08		49448.2		124.08		53087.1		124.08		52693.9
123.08		58315.6		123.08		56381.9		123.08		50566.4		123.08		54547.8		123.08		49728.9
122.08		60995.7		122.08		54741.7		122.08		50014.9		122.08		53420.6		122.08		51669.1
121.08		61271.8		121.08		57198.8		121.08		49698.1		121.08		54934.9		121.08		51165.9
120.08		62469.6		120.08		58840.5		120.08		53132		120.08		55092.3		120.08		52038.2
119.08		65752.7		119.08		58127.2		119.08		54061.2		119.08		55896		119.08		52787.6
118.08		63899.2		118.08		59832.8		118.08		52441.2		118.08		54510.2		118.08		52271.3
117.08		62551.4		117.08		56851.7		117.08		51623.1		117.08		52250.7		117.08		51503
116.08		57433.9		116.08		54082.4		116.08		49587.1		116.08		53006.5		116.08		50377.1
115.08		58953.9		115.08		54611.3		115.08		47388.9		115.08		53086.5		115.08		51185.3
114.08		60050.6		114.08		55244.7		114.08		46835		114.08		49782.2		114.08		51124.2
113.08		58726.4		113.08		55717.3		113.08		48049.3		113.08		52712.9		113.08		50377
112.08		58350.8		112.08		54658.5		112.08		48386.7		112.08		51396.7		112.08		48713
111.08		59048.5		111.08		55246.6		111.08		46556.7		111.08		51210.7		111.08		49252.2
110.08		59498.2		110.08		54412.7		110.08		45685.7		110.08		52726.8		110.08		50861.3
109.08		58801.8		109.08		55583.9		109.08		48066.1		109.08		51853		109.08		49483.1
108.08		58834.1		108.08		57112.3		108.08		49091.9		108.08		53102.8		108.08		49328.9
107.08		59145.8		107.08		55109.5		107.08		48660.1		107.08		53090.4		107.08		49811
106.08		58279.2		106.08		53667.6		106.08		45335.7		106.08		52231.8		106.08		51178.9
105.08		56862.9		105.08		57284.3		105.08		46020		105.08		52067.9		105.08		48772.1
104.08		61091.2		104.08		56959.9		104.08		47979.3		104.08		52206.2		104.08		49540.5
103.08		64673.2		103.08		58120.6		103.08		50612.9		103.08		55522.5		103.08		51709.6
102.08		64890.8		102.08		62438		102.08		50508		102.08		53861.5		102.08		52464.8
101.08		60445.8		101.08		57127.6		101.08		48276.1		101.08		52758.4		101.08		50300.5
100.08		58302.1		100.08		56665.9		100.08		44813.2		100.08		50651.4		100.08		49798.1
99.08		57809.3		99.08		53586.7		99.08		46967.8		99.08		50310.9		99.08		48057.3
98.08		55868.9		98.08		53969.7		98.08		45010		98.08		49686.5		98.08		46486.9
97.08		56172		97.08		53128.6		97.08		45644.8		97.08		50412.8		97.08		47885.9
96.08		57085		96.08		52814.2		96.08		44862.8		96.08		51265.3		96.08		46838
95.08		55500.4		95.08		53889.6		95.08		44662.6		95.08		49041.3		95.08		47955.6
94.08		56994.7		94.08		54561.8		94.08		44012		94.08		48232.6		94.08		47535.7
93.08		58182.2		93.08		57481.5		93.08		45473.9		93.08		49433.4		93.08		47867.2
92.08		62704.5		92.08		56963.6		92.08		47068.3		92.08		51494.3		92.08		47928.7
91.08		60386.3		91.08		54994.8		91.08		44165.5		91.08		50331.9		91.08		46874.9
90.08		62704.9		90.08		59193.5		90.08		48869.1		90.08		53088.8		90.08		48127.6
89.08		63271.5		89.08		60675.2		89.08		50055.6		89.08		52271		89.08		50691.2
88.08		61415.7		88.08		57437.7		88.08		44709.8		88.08		50222.8		88.08		46901.1
87.08		57745.9		87.08		53594.6		87.08		45195.9		87.08		50585.1		87.08		48965.2
86.08		57235		86.08		52986.9		86.08		43413.5		86.08		49884.9		86.08		46991
85.08		56821.6		85.08		53972.9		85.08		43121.3		85.08		50235.5		85.08		46247.3
84.08		56430.2		84.08		53803.7		84.08		43934.4		84.08		49613.8		84.08		46260.2
83.08		56975.3		83.08		54382.2		83.08		43315		83.08		50290.3		83.08		45382.4
82.08		55816.2		82.08		54459.9		82.08		41841.7		82.08		49282.6		82.08		45130.1
81.08		56119.6		81.08		51637.5		81.08		41089		81.08		47586.2		81.08		45068.5
80.08		53303.3		80.08		52345		80.08		39764.7		80.08		47082.2		80.08		44600.5
79.08		53114.4		79.08		51024.9		79.08		39554.6		79.08		46794.4		79.08		43931.5
78.08		53999.6		78.08		50589.3		78.08		39741.9		78.08		46601.2		78.08		42844.3
77.08		53352		77.08		51934.2		77.08		39606.5		77.08		46305.1		77.08		43414.9
76.08		54063.2		76.08		52276.2		76.08		40790.3		76.08		45448		76.08		42979.7
75.08		55329.4		75.08		53436.6		75.08		42810.3		75.08		47271.1		75.08		43876.5
74.08		58525.1		74.08		54128		74.08		43214		74.08		45045.6		74.08		42919.9
73.08		54039.6		73.08		49517.8		73.08		40628.6		73.08		44706.1		73.08		40504.2
72.08		52002.1		72.08		46023.4		72.08		36450.6		72.08		41857.9		72.08		40391.7
71.08		49793.9		71.08		47904.6		71.08		35699.2		71.08		40818.3		71.08		39699
70.08		48764.5		70.08		45857.5		70.08		34974.3		70.08		40030.7		70.08		39743.1
69.08		49281.4		69.08		46466.7		69.08		35654.5		69.08		41462.9		69.08		38632.7
68.08		48886.4		68.08		45842.4		68.08		35258.2		68.08		41636.2		68.08		37978.5
67.08		49229.6		67.08		46605.7		67.08		35657.6		67.08		41381.8		67.08		39854.6
66.08		51084.1		66.08		46795.1		66.08		36686.4		66.08		41503.4		66.08		39276.1
65.08		52786.8		65.08		49576.2		65.08		37300.6		65.08		42942.9		65.08		39581.6
64.08		56627.3		64.08		55769.8		64.08		39619.1		64.08		48179.2		64.08		44511.7
63.08		69267.8		63.08		63472.5		63.08		46541.4		63.08		55087.7		63.08		49738.9
62.08		76400.3		62.08		69067.2		62.08		48967.4		62.08		62411		62.08		53535.7
61.08		71573.7		61.08		63139.6		61.08		45084.6		61.08		53172.9		61.08		49329.6
60.08		60321.5		60.08		54047		60.08		38494.5		60.08		46190		60.08		42656.9
59.08		52575.6		59.08		47915.8		59.08		36977.1		59.08		44389.4		59.08		39794.5
58.08		49528.3		58.08		45370		58.08		34451.5		58.08		40188.8		58.08		36107.8
57.08		44418		57.08		44353.3		57.08		31687.9		57.08		35667.8		57.08		34914.6
56.08		41925.7		56.08		41805.1		56.08		33238.4		56.08		34580.5		56.08		33191.2
55.08		42380.6		55.08		39338.1		55.08		30752.8		55.08		34682.7		55.08		31966.2
54.08		41844		54.08		38754.3		54.08		30038.8		54.08		32835.7		54.08		32794.4
53.08		40502.8		53.08		39938.5		53.08		29619.1		53.08		34304.1		53.08		32175.9
52.08		43230.6		52.08		39508		52.08		30318.2		52.08		34371.6		52.08		32246.8
51.08		43527.7		51.08		40850.5		51.08		29341.3		51.08		33932		51.08		32839
50.08		41624.1		50.08		41280.1		50.08		30140.1		50.08		35305.6		50.08		30627.5
49.08		41711.2		49.08		36214.2		49.08		28249.7		49.08		30558.2		49.08		31202.6
48.08		39661		48.08		35894		48.08		25338		48.08		28854.1		48.08		26556
47.08		34946.3		47.08		34121		47.08		25479.5		47.08		28603.5		47.08		25628.1
46.08		33754		46.08		32514.8		46.08		23034.1		46.08		27574.4		46.08		24816.3
45.08		34745.9		45.08		29516.8		45.08		24170.9		45.08		25969.7		45.08		23525
44.08		34025.3		44.08		30612.5		44.08		23605		44.08		27319.2		44.08		24227.3
43.08		34541.3		43.08		32218.3		43.08		23744.8		43.08		25906.9		43.08		24629.4
42.08		33732.5		42.08		31059.2		42.08		23067		42.08		25903.4		42.08		23839.9
41.08		36091.8		41.08		31721.1		41.08		24431.9		41.08		28926.6		41.08		25252.9
40.08		39052.4		40.08		35770.2		40.08		25394.1		40.08		30993.6		40.08		26670.3
39.08		49594		39.08		45192.8		39.08		31038.1		39.08		39098.8		39.08		36016.9
38.08		71362.7		38.08		66359.7		38.08		44423.9		38.08		57459.2		38.08		47692.9
37.08		94232		37.08		87463.5		37.08		54357.7		37.08		68368.2		37.08		60030.7
36.08		77461.7		36.08		67329.9		36.08		41459.4		36.08		53626.8		36.08		47249
35.08		47333.2		35.08		40071.2		35.08		26556		35.08		32094.3		35.08		29737.1
34.08		32543.3		34.08		28380.3		34.08		19863.8		34.08		23559.5		34.08		21503.2
33.08		25609.7		33.08		22809.2		33.08		16627		33.08		21283.7		33.08		18603
32.08		22076.5		32.08		17777.2		32.08		14081.6		32.08		14543.3		32.08		14859.8
31.08		16029.6		31.08		13687.9		31.08		12579.3		31.08		13305.1		31.08		12392.2
30.08		14860.1		30.08		14279.7		30.08		12736.3		30.08		12195.4		30.08		12197.1
29.08		16085.2		29.08		14353.4		29.08		13493.2		29.08		12541.6		29.08		11854.7
28.08		15523.7		28.08		15162.8		28.08		15578.6		28.08		14287.5		28.08		12727.5
27.08		16672		27.08		16105.3		27.08		16522.5		27.08		14472.6		27.08		14633.7
26.08		20605.5		26.08		18107.1		26.08		18281.9		26.08		16349		26.08		16016.2
25.08		23802.9		25.08		20944.5		25.08		19562.9		25.08		17513.6		25.08		16114.4
24.08		27267.5		24.08		24050.2		24.08		23568.8		24.08		20540.1		24.08		19684.5
23.08		32888.3		23.08		30534.8		23.08		23860.1		23.08		25126.2		23.08		23747.1
22.08		36667.3		22.08		33044.5		22.08		25518.2		22.08		25887.8		22.08		24929.6
21.08		31340.5		21.08		26858.8		21.08		18768.4		21.08		22129.5		21.08		19066.3
20.08		20720.9		20.08		19818.4		20.08		13629.4		20.08		15369.6		20.08		14369.6
19.08		15948.6		19.08		14535.2		19.08		11054.4		19.08		12435.5		19.08		12397.4
18.08		12741.6		18.08		10983.4		18.08		9920.77		18.08		10783.3		18.08		9466.78
17.08		9760.39		17.08		10763.2		17.08		9129.5		17.08		9593.89		17.08		8879.93
16.08		8760.97		16.08		8655.16		16.08		8486.76		16.08		7801.6		16.08		7993.15
15.08		8455.45		15.08		8249.77		15.08		8788.92		15.08		7528.82		15.08		7189.51
14.08		8089.6		14.08		7613.3		14.08		9469.11		14.08		7815.61		14.08		6966.59
13.08		8135.75		13.08		8541.09		13.08		7856.8		13.08		7297.17		13.08		6624.49
12.08		6522.91		12.08		6436.1		12.08		7617.79		12.08		6694.47		12.08		5942.81
11.08		7817.97		11.08		7108.79		11.08		6821		11.08		5252.98		11.08		5592.76
10.08		9110.97		10.08		8614.76		10.08		7936.16		10.08		6242.97		10.08		6375.73
9.08		8747.04		9.08		8056.13		9.08		8383.64		9.08		6477.91		9.08		6247.28
8.08		11367.1		8.08		9954.57		8.08		8446		8.08		9263.42		8.08		7945.6
7.08		14938.8		7.08		13117.8		7.08		9763.31		7.08		11650.4		7.08		10030.1
6.08		14808.8		6.08		14772.9		6.08		9769.57		6.08		11418.7		6.08		9978.63
5.08		13666.2		5.08		12028.8		5.08		8974.38		5.08		10472.6		5.08		9118.91
4.08		11164.4		4.08		10806.9		4.08		7226.03		4.08		8119.92		4.08		6268.66
3.08		5777.84		3.08		5177.49		3.08		3409.81		3.08		3870.18		3.08		3435.16
2.08		2130.12		2.08		2043.38		2.08		1452.75		2.08		1989.36		2.08		1394.36
1.08		1439.25		1.08		1131.16		1.08		798.423		1.08		915.85		1.08		1003.35
0.08		864.99		0.08		649.245		0.08		620.317		0.08		454.77		0.08		596.106
-0.92		360.152		-0.92		352.785		-0.92		190.193		-0.92		219.18		-0.92		187.058
-1.92		177.77		-1.92		160.82		-1.92		99.7868		-1.92		333.209		-1.92		157.437
-2.92		218.369		-2.92		134.567		-2.92		85.3782		-2.92		69.9924		-2.92		89.1388
-3.92		86.9723		-3.92		77.4915		-3.92		23.6732		-3.92		192.705		-3.92		124.17
-4.92		196.378		-4.92		97.043		-4.92		57.1663		-4.92		86.329		-4.92		130.912
-5.92		65.4753		-5.92		55.0396		-5.92		61.4686		-5.92		43.6488		-5.92		109.124
-6.92		65.4902		-6.92		119.591		-6.92		91.3265		-6.92		21.8295		-6.92		72.9753
-7.92		176.016		-7.92		111.988		-7.92		70.1792		-7.92		81.5696		-7.92		58.0187
-8.92		86.6921		-8.92		83.3491		-8.92		3.62461		-8.92		27.6107		-8.92		87.3674
-9.92		64.8692		-9.92		88.5736		-9.92		87.3827		-9.92		43.6909		-9.92		87.379

## Sheet: XPS-3W
B.E.		Smooth-0		Smooth-4
410.08		5588.7		5263.38
409.98		5481.48		5322.88
409.88		5498.99		5310.99
409.78		5464.9		5313.06
409.68		5458.75		5310.65
409.58		5457.62		5324.71
409.48		5474.45		5319.33
409.38		5462.37		5298.9
409.28		5465.87		5289.91
409.18		5477.92		5290.17
409.08		5466.81		5285.72
408.98		5453.65		5313.78
408.88		5470.62		5328.23
408.78		5473.42		5333.84
408.68		5471.03		5330.07
408.58		5471.1		5367.23
408.48		5480.45		5401.62
408.38		5471.72		5427.59
408.28		5470.27		5478.64
408.18		5460.01		5488.74
408.08		5444.89		5474.89
407.98		5455.67		5473.37
407.88		5455.14		5485.84
407.78		5450.08		5493.33
407.68		5471.28		5466.12
407.58		5476.18		5457.47
407.48		5492.97		5463.22
407.38		5507.82		5460.06
407.28		5524.44		5470.57
407.18		5528.9		5492.62
407.08		5555.45		5523.52
406.98		5572.78		5550.63
406.88		5581.62		5569.37
406.78		5618.25		5619.35
406.68		5598.18		5620.89
406.58		5590.93		5622.2
406.48		5591.35		5600.18
406.38		5574.14		5580.24
406.28		5564.33		5576.54
406.18		5538.14		5535.69
406.08		5528.2		5499.98
405.98		5499.14		5466.28
405.88		5475.87		5442.29
405.78		5454.6		5413.92
405.68		5405.8		5390.62
405.58		5376.38		5380.07
405.48		5337.85		5368.88
405.38		5311.59		5357
405.28		5293.51		5348.84
405.18		5300.06		5334.11
405.08		5285.94		5330.87
404.98		5263.49		5297.88
404.88		5263.57		5270.89
404.78		5251.71		5283.09
404.68		5250.67		5263.24
404.58		5243.17		5267.53
404.48		5239.86		5233.77
404.38		5265.03		5223.02
404.28		5260.34		5217.3
404.18		5255.6		5228.08
404.08		5278.99		5238.3
403.98		5301.83		5255.46
403.88		5291.76		5253.62
403.78		5312.29		5269.72
403.68		5330.43		5275.81
403.58		5334.55		5316.46
403.48		5336.69		5352.2
403.38		5358.12		5371.03
403.28		5379.63		5385.46
403.18		5390.62		5388.1
403.08		5417.66		5394.86
402.98		5457.71		5415.12
402.88		5514.49		5447.54
402.78		5573.15		5473.32
402.68		5616.3		5487.99
402.58		5685.02		5514.33
402.48		5758.36		5571.75
402.38		5832.96		5603.7
402.28		5906.47		5685.38
402.18		5997.33		5757.79
402.08		6083.73		5796.59
401.98		6184.67		5847.02
401.88		6290.58		5919.7
401.78		6374.27		5990.87
401.68		6502.21		6081.79
401.58		6639.98		6148.82
401.48		6779.5		6256.5
401.38		6971.31		6350.81
401.28		7208.07		6495.04
401.18		7482.37		6689.34
401.08		7808.8		6891.07
400.98		8248.1		7137.47
400.88		8722.91		7456.47
400.78		9249.99		7812.54
400.68		9847.13		8194.24
400.58		10496.2		8639.58
400.48		11190.3		9150.15
400.38		11894.4		9698.73
400.28		12573.7		10217.5
400.18		13217.3		10780.9
400.08		13770		11314.1
399.98		14201.6		11760.1
399.88		14507.7		12098.6
399.78		14694.4		12406.6
399.68		14700.8		12549.6
399.58		14586.8		12570.2
399.48		14332		12418.1
399.38		13911.4		12158.4
399.28		13397.2		11749.5
399.18		12795.6		11231
399.08		12101.9		10680.2
398.98		11372		10094.9
398.88		10644.3		9501.78
398.78		9926.04		8926.24
398.68		9256.64		8360.91
398.58		8649.92		7865.49
398.48		8103.52		7440.01
398.38		7616.2		7067.8
398.28		7180.47		6745.3
398.18		6821.17		6472
398.08		6541.02		6262.7
397.98		6315.39		6063.66
397.88		6121.38		5908.98
397.78		5965.22		5787.65
397.68		5829.47		5683.99
397.58		5721.37		5600.86
397.48		5639.44		5565.3
397.38		5563.11		5533.22
397.28		5503.16		5474.52
397.18		5454.09		5415.56
397.08		5406.6		5400.13
396.98		5383.44		5406.52
396.88		5371.12		5377.41
396.78		5341.42		5363.99
396.68		5316.05		5357.14
396.58		5291.7		5341.63
396.48		5257.27		5335.54
396.38		5264.43		5332.13
396.28		5261.26		5363.38
396.18		5250.05		5350.74
396.08		5253.14		5332.85
395.98		5243.93		5331.61
395.88		5238.63		5342.6
395.78		5232.44		5330.15
395.68		5239.07		5293.88
395.58		5229.26		5270.72
395.48		5241.06		5269.42
395.38		5240.74		5241.26
395.28		5244.36		5223.98
395.18		5268.45		5229.72
395.08		5268.57		5241.08
394.98		5265.71		5218.63
394.88		5256.64		5227.26
394.78		5258.19		5214.36
394.68		5279.09		5228.6
394.58		5274.99		5227.23
394.48		5275.86		5246.09
394.38		5264.41		5264.02
394.28		5277.35		5265.08
394.18		5277.85		5258.7
394.08		5284.7		5265.75
393.98		5286.04		5273.01
393.88		5266.05		5306.11
393.78		5252.33		5306.79
393.68		5245.26		5326.35
393.58		5260.28		5305.26
393.48		5241.28		5293.03
393.38		5221.11		5279.29
393.28		5219.52		5284.7
393.18		5211.17		5290.09
393.08		5209		5262.21
392.98		5187.71		5254.68
392.88		5195.04		5253.29
392.78		5183.98		5244.35
392.68		5180.88		5276.4
392.58		5191.08		5270.64
392.48		5173.89		5263.85
392.38		5196.91		5253.91
392.28		5234.84		5260.4
392.18		5292.46		5267.39
392.08		5215.02		5238.91

## Sheet: MMP-2
	(2-Azide)-PEG5-K15-PVGLIG-K23
	0 ug/ml			10 ug/ml
1	2.23	4.05	4.82	58.86	58.45	64.59
2	4.04	5.13	4.98	76.26	76.54	80.29
3	4.11	6.56	5.23	84.26	83.45	88.23
4	4.46	7.59	5.43	87.88	85.33	89.11
5	4.59	7.61	5.59	89.45	85.33	89.88
6	4.69	7.72	5.61	90.14	85.54	90.33
7	4.69	7.74	5.66	90.14	86.25	90.46
	(2-Azide)-PEG5-Y5-PVGLIG-K23
	0 ug/ml			10 ug/ml
1	5.23	6.25	4.02	66.66	62.45	68.69
2	6.24	8.33	5.08	81.36	77.54	83.99
3	6.31	8.46	5.23	85.28	83.39	86.93
4	6.46	8.79	5.63	87.58	85.53	89.11
5	6.59	8.91	5.95	89.85	87.73	91.43
6	6.69	9.04	6.02	91.24	89.22	92.43
7	6.69	9.11	6.23	92.14	90.25	92.66

## Sheet: P1 P2 Ratio
ALP							ARS
0:0	4:0	3:1	2:2	1:3	0:4		0:0	4:0	3:1	2:2	1:3	0:4
2.69	4.45	6.58	30.52	35.85	40.25		5.69	10.52	38.96	55.69	64.58	54.25
4.55	2.86	6.5	28.64	38.15	38.52		7.88	8.25	32.21	50.25	56.25	66.85
3.33	4.12	7.85	32.17	32.98	34.66		6.98	6.35	32.36	59.88	54.58	58.22
3.52333	3.81	6.97667	30.4433	35.66	37.81		6.85	8.37333	34.51	55.2733	58.47	59.7733
Junctions							Branches
0:0	4:0	3:1	2:2	1:3	0:4		0:0	4:0	3:1	2:2	1:3	0:4
1.19	8.62	8.23	6.95	4.25	1.21		1.23	5.63	5.36	4.55	3.65	1.23
0.78	7.65	8.01	6.92	3.99	1.33		0.99	5.24	5.96	4.36	3.25	1.04
1.02	7.58	7.07	6.45	4.65	1.25		0.78	6.23	5.26	4.82	3.01	1.23
0.996667	7.95	7.77	6.77333	4.29667	1.26333		1	5.7	5.52667	4.57667	3.30333	1.16667
