# Supplementary material for: Peptide-based Self-adaptive Implant Coating Sequentially Regulates Bone Regeneration to Enhance Interfacial Osseointegration
Source: Research Square preprint supplement (doi:10.21203/rs.3.rs-5132912/v1), 2024-10-01
Supplement: Supplementary file 1069 [file Figure 2.xlsx]

## Sheet: CCK-8
	Temperature(¡C)		RAW264.7
			1day						3day
	20.5		1	2	3	4	5		6	7	8	9	10
			0.5348	0.5657	0.5764	0.6235	0.6213		0.9282	1.1921	1.2072	1.2852	1.0855
			0.5478	0.6558	0.6052	0.6283	0.5802		0.9698	1.1359	1.2361	0.9966	1.2199
			0.5521	0.5598	0.5473	0.6025	0.6233		1.0196	1.1741	1.2217	1.1874	1.1258
			0.5602	0.5684	0.6606	0.5322	0.5814		0.9222	1.0828	0.9738	1.0212	1.1705
			0.4714	0.6396	0.5968	0.5995	0.6082		0.9301	1.0895	1.0535	1.2191	1.1644
			0.53326	0.59786	0.59726	0.5972	0.60288		0.95398	1.13488	1.13846	1.1419	1.15322
			BMSC
	Temperature(¡C)		1day						3day
			1	2	3	4	5		6	7	8	9	10
	21		0.4377	0.5165	0.4972	0.5116	0.4994		1.1905	1.0799	1.2118	1.1745	1.1702
			0.4446	0.4904	0.4721	0.5192	0.5298		0.9801	1.2106	1.1593	1.1909	1.1466
			0.4262	0.5061	0.5102	0.5041	0.4967		1.0047	1.1912	1.2829	1.2019	1.2407
			0.4183	0.5325	0.5167	0.4741	0.5308		1.0559	1.3074	1.1946	1.2286	1.2441
			0.4624	0.4766	0.5058	0.5265	0.5295		1.0145	1.2265	1.1819	1.2287	1.2746
			0.43784	0.50442	0.5004	0.5071	0.51724		1.04914	1.20312	1.2061	1.20492	1.21524
			HUVEC
	Temperature(¡C)		1day						3day
			1	2	3	4	5		6	7	8	9	10
	20.5		0.5472	0.5728	0.6261	0.6243	0.5871		1.0151	1.2529	1.2219	1.2482	1.25574
			0.4399	0.6246	0.6158	0.5929	0.6307		1.0257	1.1227	1.1585	1.1857	1.1142
			0.5364	0.5675	0.5393	0.6123	0.5746		0.9355	1.0817	1.2765	1.2362	1.2426
			0.4239	0.6956	0.6138	0.6102	0.6246		1.0292	1.1715	1.1276	1.1336	1.2295
			0.4908	0.5888	0.5736	0.5261	0.5918		0.9436	1.2306	1.0992	1.1532	1.1152
			0.48764	0.60986	0.59372	0.59316	0.60176		0.98982	1.17188	1.17674	1.19138	1.19145

## Sheet: LDH
	Temperature(¡C)																			Red Delete
RAW			Blank	Control	Max	1	2	3	4	5				1	2	3	4	5		1	2	3	4	5		TiO2	DOPA	DOPA-P1	DOPA-P2	DOPA-P1@P2		TiO2	DOPA	DOPA-P1	DOPA-P2	DOPA-P1@P2
	25.5		0.3906	0.5865	3.5966	0.7047	0.6897	0.7377	0.6962	0.6963		0.1959	3.206	0.3141	0.2991	0.3471	0.3056	0.3057		0.0392678	0.0342846	0.0502309	0.036444	0.0364772		0.0392678	0.0342846	0.0355028	0.036444	0.0364772		1.06706	0.931646	0.964749	0.990325	0.991228
			0.3757	0.5156	3.5548	0.6323	0.6215	0.6235	0.6258	0.6382		0.1399	3.1791	0.2566	0.2458	0.2478	0.2501	0.2625		0.0383983	0.0348447	0.0355028	0.0362595	0.0403396		0.0383983	0.0348447	0.0338366	0.0362595	0.0403396		1.04343	0.946867	0.919472	0.985314	1.09618
			0.3795	0.5727	3.6197	0.6793	0.6941	0.6758	0.6214	0.6806		0.1932	3.2402	0.2998	0.3146	0.2963	0.2419	0.3011		0.0349852	0.0398425	0.0338366	0.0159829	0.0354119		0.0349852	0.0398425	0.0404752	0.0411702	0.0354119		0.950686	1.08268	1.09987	1.11876	0.962279
			0.3943	0.5663	3.5879	0.6653	0.6874	0.6886	0.6907	0.6801		0.172	3.1936	0.271	0.2931	0.2943	0.2964	0.2858		0.0327641	0.0400781	0.0404752	0.0411702	0.0376622		0.0359221	0.0400781	0.035688	0.0379624	0.0376622		0.976145	1.08908	0.969783	1.03159	1.02343
			0.4149	0.5788	3.5686	0.6862	0.6632	0.6855	0.6923	0.6351		0.1639	3.1537	0.2713	0.2483	0.2706	0.2774	0.2202		0.0359221	0.0282293	0.035688	0.0379624	0.0188307		0.0352439	0.038123	0.0396122	0.0412337	0.0395791		0.957715	1.03595	1.07642	1.12048	1.07552
			0.4446	0.5626	3.5844	0.6691	0.6778	0.6823	0.6872	0.6822		0.118	3.1398	0.2245	0.2332	0.2377	0.2426	0.2376		0.0352439	0.038123	0.0396122	0.0412337	0.0395791		0.0367635
HUVEC	Temperature(¡C)
			Blank	Control	Max	1	2	3	4	5				1	2	3	4	5		1	2	3	4	5		TiO2	DOPA	DOPA-P1	DOPA-P2	DOPA-P1@P2		TiO2	DOPA	DOPA-P1	DOPA-P2	DOPA-P1@P2
	25.5		0.4426	0.5866	3.6346	0.6841	0.6852	0.6724	0.6838	0.6474		0.144	3.192	0.2415	0.2426	0.2298	0.2412	0.2048		0.0319882	0.0323491	0.0281496	0.0318898	0.0199475		0.0319882	0.0323491	0.0281496	0.0318898	0.0302989		1.05572	1.06763	0.92903	1.05247	0.999964
			0.3959	0.5841	3.5149	0.6225	0.6148	0.6728	0.6398	0.6729		0.1882	3.119	0.2266	0.2189	0.2769	0.2439	0.277		0.0131022	0.010475	0.0302648	0.019005	0.0302989		0.0268536	0.0319215	0.0302648	0.0297496	0.0274459		0.886257	1.05352	0.998837	0.981834	0.905807
			0.4024	0.5715	3.6102	0.6531	0.6685	0.6744	0.6619	0.6549		0.1691	3.2078	0.2507	0.2661	0.272	0.2595	0.2525		0.0268536	0.0319215	0.0338632	0.0297496	0.0274459		0.0282023	0.0303994	0.0338632	0.0347281	0.0330885		0.930768	1.00328	1.1176	1.14614	1.09203
			0.3924	0.5635	3.6129	0.6495	0.6562	0.6313	0.6694	0.6644		0.1711	3.2205	0.2571	0.2638	0.2389	0.277	0.272		0.0282023	0.0303994	0.0222339	0.0347281	0.0330885		0.0309838	0.0335994	0.0345383	0.0335323	0.0331634		1.02257	1.10889	1.13988	1.10668	1.0945
			0.4303	0.5564	3.5386	0.6488	0.6566	0.6594	0.6564	0.6553		0.1261	3.1083	0.2185	0.2263	0.2291	0.2261	0.225		0.0309838	0.0335994	0.0345383	0.0335323	0.0331634		0.0335017	0.0278906	0.030135	0.0282206	0.0282866		1.10567	0.92048	0.994554	0.931373	0.933552
			0.4306	0.5822	3.6119	0.6837	0.6667	0.6735	0.6677	0.6679		0.1519	3.1816	0.2534	0.2364	0.2432	0.2374	0.2376		0.0335017	0.0278906	0.030135	0.0282206	0.0282866		0.0303059
BMSC	Temperature(¡C)
			Blank	Control	Max	1	2	3	4	5				1	2	3	4	5		1	2	3	4	5		TiO2	DOPA	DOPA-P1	DOPA-P2	DOPA-P1@P2		TiO2	DOPA	DOPA-P1	DOPA-P2	DOPA-P1@P2
	25.5		0.5365	0.7264	3.5699	1.0042	0.8808	1.0003	0.9539	0.8812		0.1899	3.0334	0.4677	0.3443	0.4638	0.4174	0.3447		0.0976965	0.0542993	0.096325	0.080007	0.05444		0.0515986	0.0542993	0.0532758	0.0513132	0.05444		1.02176	1.07523	1.05497	1.0161	1.07802
			0.4928	0.7391	3.5415	0.8837	0.8704	0.8884	0.8829	0.8737		0.2463	3.0487	0.3909	0.3776	0.3956	0.3901	0.3809		0.0515986	0.0468527	0.0532758	0.0513132	0.0480303		0.0451078	0.0468527	0.0466681	0.0495458	0.0480303		0.893224	0.927776	0.92412	0.981105	0.951094
			0.4956	0.7297	3.6139	0.8598	0.8825	0.8643	0.8726	0.8749		0.2341	3.1183	0.3642	0.3869	0.3687	0.377	0.3793		0.0451078	0.0529783	0.0466681	0.0495458	0.0503432		0.0553455	0.0529783	0.052755	0.0547154	0.0503432		1.09595	1.04908	1.04465	1.08347	0.996896
			0.5208	0.7241	3.5807	0.8822	0.8613	0.8748	0.8804	0.8777		0.2033	3.0599	0.3614	0.3405	0.354	0.3596	0.3569		0.0553455	0.0480291	0.052755	0.0547154	0.0537702		0.0459477	0.0480291	0.0480313	0.0487857	0.0537702		0.909855	0.951072	0.951115	0.966054	1.06476
			0.5366	0.7868	3.5704	0.9147	0.9224	0.9205	0.9226	0.9225		0.2502	3.0338	0.3781	0.3858	0.3839	0.386	0.3859		0.0459477	0.0487139	0.0480313	0.0487857	0.0487498		0.0546737	0.0487139	0.0536663	0.0550905	0.0487498		1.08265	0.964632	1.0627	1.0909	0.965343
			0.5178	0.7068	3.5857	0.8642	0.8954	0.8613	0.8654	1.0014		0.189	3.0679	0.3464	0.3776	0.3435	0.3476	0.4836		0.0546737	0.0655111	0.0536663	0.0550905	0.102331		0.0505347
