# Supplementary material for: Peptide-based Self-adaptive Implant Coating Sequentially Regulates Bone Regeneration to Enhance Interfacial Osseointegration
Source: Research Square preprint supplement (doi:10.21203/rs.3.rs-5132912/v1), 2024-10-01
Supplement: Supplementary file 1073 [file Figure 3.xlsx]

## Sheet: ELISA
TNF-α						IL-10
TIO2	DOPA	DOPA-P1	DOPA-P2	DOPA-P1@P2		TIO2	DOPA	DOPA-CO	DOPA-P	DOPA-CO@P
9850.24	9363.21	3213.31	2823.73	3202.45		4.45	4.33	11.35	10.19	10.83
9223.36	8421.15	3629.23	3534.22	3313.83		3.61	3.96	10.02	10.86	10.82
9053.13	9353.79	3587.46	3612.73	2846.15		4.32	3.52	9.65	9.33	9.24
8715.62	8549.99	2858.13	3256.79	2867.88		3.64	4.65	9.75	9.28	9.66
8846.88	8929.75	3666.25	2856.75	3234.54		3.57	3.92	10.59	9.35	9.68

## Sheet: RT-qPCR
RT-qPCR数据分析报告
基因	分组	内参	目的基因	ΔCt	—ΔΔCt	相对表达量	相对均值
Ccr7	TiO2	19.97	22.83	2.86	0.07	1.04972	1.00435
		20.13	22.94	2.81	0.12	1.08673
		19.94	23.06	3.12	-0.19	0.876606
	DOPA	19.85	22.9	3.05	-0.12	0.920188	0.859609
		19.9	23.1	3.2	-0.27	0.82932
		19.97	23.17	3.2	-0.27	0.82932
	DOPA-P1	19.83	25.92	6.09	-3.16	0.111878	0.110101
		19.77	25.87	6.1	-3.17	0.111105
		19.7	25.85	6.15	-3.22	0.107321
	DOPA-P2	19.85	26.09	6.24	-3.31	0.10083	0.0954161
		19.83	26.04	6.21	-3.28	0.102949
		19.83	26.36	6.53	-3.6	0.0824692
	DOPA-P1@P2	19.79	26.07	6.28	-3.35	0.098073	0.100683
		19.86	26.15	6.29	-3.36	0.0973956
		19.8	25.96	6.16	-3.23	0.106579
Cd206	TiO2	19.97	26.31	6.34	-0.12	0.920188	1.00338
		20.13	26.39	6.26	-0.04	0.972655
		19.94	26	6.06	0.16	1.11729
	DOPA	19.85	26.22	6.37	-0.15	0.90125	0.978838
		19.9	26.12	6.22	-2.66454e-15	1
		19.97	26.14	6.17	0.05	1.03526
	DOPA-P1	19.83	22.83	3	3.22	9.31787	8.91519
		19.77	22.72	2.95	3.27	9.64646
		19.7	22.96	3.26	2.96	7.78124
	DOPA-P2	19.85	22.97	3.12	3.1	8.57419	8.6174
		19.83	22.99	3.16	3.06	8.33973
		19.83	22.89	3.06	3.16	8.9383
	DOPA-P1@P2	19.79	22.93	3.14	3.08	8.45614	8.15833
		19.86	23.15	3.29	2.93	7.6211
		19.8	22.95	3.15	3.07	8.39773
Vegf	TiO2	19.97	25.8	5.83	0.01	1.00696	1.01212
		20.13	25.7	5.57	0.27	1.20581
		19.94	26.06	6.12	-0.28	0.823591
	DOPA	19.85	25.68	5.83	0.01	1.00696	1.03911
		19.9	25.75	5.85	-0.01	0.993092
		19.97	25.65	5.68	0.16	1.11729
	DOPA-P1	19.83	22.66	2.83	3.01	8.05564	7.36449
		19.77	22.86	3.09	2.75	6.72717
		19.7	22.67	2.97	2.87	7.31065
	DOPA-P2	19.85	22.84	2.99	2.85	7.21	7.03024
		19.83	22.87	3.04	2.8	6.9644
		19.83	22.88	3.05	2.79	6.9163
	DOPA-P1@P2	19.79	22.76	2.97	2.87	7.31065	6.8785
		19.86	22.91	3.05	2.79	6.9163
		19.8	22.96	3.16	2.68	6.40856
Fgf-2	TiO2	19.97	25.65	5.68	-0.0566667	0.961483	1.00039
		20.13	25.73	5.6	0.0233333	1.0163
		19.94	25.53	5.59	0.0333333	1.02337
	DOPA	19.85	25.82	5.97	-0.346667	0.786399	0.929186
		19.9	25.61	5.71	-0.0866667	0.941696
		19.97	25.51	5.54	0.0833333	1.05946
	DOPA-P1	19.83	22.69	2.86	2.76333	6.78963	6.11111
		19.77	22.82	3.05	2.57333	5.95183
		19.7	22.84	3.14	2.48333	5.59188
	DOPA-P2	19.85	22.86	3.01	2.61333	6.11916	6.16175
		19.83	22.95	3.12	2.50333	5.66994
		19.83	22.71	2.88	2.74333	6.69616
	DOPA-P1@P2	19.79	22.92	3.13	2.49333	5.63077	6.1297
		19.86	22.82	2.96	2.66333	6.33495
		19.8	22.74	2.94	2.68333	6.42338
Col1a1	TiO2	19.97	26.33	6.36	-0.123333	0.918064	1.01186
		20.13	26.06	5.93	0.306667	1.23685
		19.94	26.36	6.42	-0.183333	0.880666
	DOPA	19.85	25.78	5.93	0.306667	1.23685	1.15031
		19.9	25.98	6.08	0.156667	1.11471
		19.97	26.07	6.1	0.136667	1.09936
	DOPA-P1	19.83	22.87	3.04	3.19667	9.16838	7.77209
		19.77	23.06	3.29	2.94667	7.70966
		19.7	23.25	3.55	2.68667	6.43824
	DOPA-P2	19.85	23.06	3.21	3.02667	8.14925	7.82265
		19.83	23.17	3.34	2.89667	7.44704
		19.83	23.09	3.26	2.97667	7.87165
	DOPA-P1@P2	19.79	22.88	3.09	3.14667	8.85607	8.33257
		19.86	23.14	3.28	2.95667	7.76328
		19.8	22.97	3.17	3.06667	8.37835
Opn	TiO2	19.77	22.69	2.92	-0.12	0.920188	1.00186
		19.85	22.56	2.71	0.09	1.06437
		20.03	22.8	2.77	0.03	1.02101
	DOPA	19.96	22.51	2.55	0.25	1.18921	1.24613
		19.97	22.41	2.44	0.36	1.28343
		20.04	22.5	2.46	0.34	1.26576
	DOPA-P1	20	19.8	-0.2	3	8	7.55935
		19.95	20.06	0.11	2.69	6.45313
		20.04	19.8	-0.24	3.04	8.22491
	DOPA-P2	20.02	20.13	0.11	2.69	6.45313	6.76368
		20.05	20.1	0.05	2.75	6.72717
		20.08	20.05	-0.03	2.83	7.11074
	DOPA-P1@P2	20.01	20.06	0.05	2.75	6.72717	7.39715
		20.17	20.07	-0.1	2.9	7.46426
		20.13	19.93	-0.2	3	8
Vegf	TiO2	19.99	22.58	2.59	-0.09	0.939523	1.00398
		20.15	22.74	2.59	-0.09	0.939523
		20.39	22.71	2.32	0.18	1.13288
	DOPA	20.34	22.61	2.27	0.23	1.17283	1.12912
		20.46	22.56	2.1	0.4	1.31951
		20.38	23.04	2.66	-0.16	0.895025
	DOPA-P1	20.06	20.23	0.17	2.33	5.02805	4.4233
		20.19	20.39	0.2	2.3	4.92458
		20.19	20.96	0.77	1.73	3.31728
	DOPA-P2	20.26	22.69	2.43	0.07	1.04972	1.05249
		20.52	22.9	2.38	0.12	1.08673
		20.41	22.88	2.47	0.03	1.02101
	DOPA-P1@P2	20.46	20.55	0.09	2.41	5.31474	4.32968
		20.14	20.69	0.55	1.95	3.86375
		20.07	20.64	0.57	1.93	3.81055
Fgf-2	TiO2	19.99	22.76	2.77	-0.24	0.846745	1.00968
		20.15	22.69	2.54	-0.01	0.993092
		20.39	22.67	2.28	0.25	1.18921
	DOPA	20.34	22.8	2.46	0.07	1.04972	1.03988
		20.46	22.83	2.37	0.16	1.11729
		20.38	22.98	2.6	-0.07	0.952638
	DOPA-P1	20.06	20.59	0.53	2	4	4.11992
		20.19	20.76	0.57	1.96	3.89062
		20.19	20.56	0.37	2.16	4.46915
	DOPA-P2	20.26	23.31	3.05	-0.52	0.697372	0.932689
		20.52	22.93	2.41	0.12	1.08673
		20.41	22.92	2.51	0.02	1.01396
	DOPA-P1@P2	20.46	20.52	0.06	2.47	5.54044	4.55389
		20.14	20.58	0.44	2.09	4.25748
		20.07	20.65	0.58	1.95	3.86375
Col1a1	TiO2	19.99	22.59	2.6	-0.106667	0.928731	1.00162
		20.15	22.63	2.48	0.0133333	1.00928
		20.39	22.79	2.4	0.0933333	1.06683
	DOPA	20.34	22.88	2.54	-0.0466667	0.968171	1.01609
		20.46	22.75	2.29	0.203333	1.15136
		20.38	22.98	2.6	-0.106667	0.928731
	DOPA-P1	20.06	22.8	2.74	-0.246667	0.842842	0.877117
		20.19	22.81	2.62	-0.126667	0.915945
		20.19	22.88	2.69	-0.196667	0.872564
	DOPA-P2	20.26	20.58	0.32	2.17333	4.51064	4.9112
		20.52	20.54	0.02	2.47333	5.55325
		20.41	20.68	0.27	2.22333	4.66971
	DOPA-P1@P2	20.46	20.19	-0.27	2.76333	6.78963	5.34087
		20.14	20.33	0.19	2.30333	4.93597
		20.07	20.46	0.39	2.10333	4.29701
Opn	TiO2	19.99	22.65	2.66	0.015	1.01045	1.09898
		20.15	22.84	2.69	-0.015	0.989657
		20.39	22.69	2.3	0.375	1.29684
	DOPA	20.34	22.89	2.55	0.125	1.09051	1.26179
		20.46	22.68	2.22	0.455	1.37078
		20.38	22.65	2.27	0.405	1.32409
	DOPA-P1	20.06	22.72	2.66	0.015	1.01045	1.07425
		20.19	22.68	2.49	0.185	1.13682
		20.19	22.76	2.57	0.105	1.07549
	DOPA-P2	20.26	20.22	-0.04	2.715	6.56593	6.784
		20.52	20.43	-0.09	2.765	6.79748
		20.41	20.28	-0.13	2.805	6.98858
	DOPA-P1@P2	20.46	20.45	-0.01	2.685	6.43081	5.7913
		20.14	20.44	0.3	2.375	5.18736
		20.07	20.22	0.15	2.525	5.75573

## Sheet: WB
	TiO2	DOPA	DOPA-P1	DOPA-P2	DOPA-P1@P2			TiO2	DOPA	DOPA-P1	DOPA-P2	DOPA-P1@P2
Inos	25017.9	28504.3	10429.5	7528.12	8756.44		Arg-1	15714	16919.1	29453.6	30079.7	29770.9
	26577.8	28005.2	12026.4	9154.08	10391.8			14132.7	14163.8	25983.7	27457.5	27759.4
	23010.9	25546.8	8078.12	7585.83	10120.3			13486.7	14235.6	29890.5	25141.8	24952.1
β-actin（Avg.）	27857.9	29900.7	28832.5	28216.6	27401.3		β-actin（Avg.）	27857.9	29900.7	28832.5	28216.6	27401.3
Inos/β-actin	0.898055	0.953299	0.361726	0.266798	0.319562		Arg-1/β-actin	0.56408	0.565845	1.02154	1.06603	1.08648
	0.954052	0.936609	0.417112	0.324422	0.379244			0.507313	0.473696	0.901194	0.973097	1.01307
	0.82601	0.854388	0.280174	0.268843	0.369337			0.484124	0.476098	1.03669	0.89103	0.910617

## Sheet: flow cytometry
	TiO2	DOPA	DOPA-P1	DOPA-P2	DOPA-P1@P2
CD86	78.6	74.9	26.1	24.9	24.6
	71.9	70.6	20.3	19.9	24.3
	82.3	79.8	21.6	24.8	19.8
CD206	7.27	7.21	24.6	25	27.3
	5.22	5.29	22.8	28.8	26.8
	6.07	5.88	26.6	25.6	23.7

## Sheet: IF-Arg-1
	Area	Mean	StdDev	%Area			TIO2	DOPA	DOPA-P1	DOPA-P2	DOPA-P1@P2
TIO2	455.11	3.38	6.16	0.04		Mean	3.38	3.28	11.3	11.19	11.98
DOPA	455.11	3.28	4.67	0.03			2.58	2.78	9.88	10.25	11.03
DOPA-P1	455.11	11.3	19.75	3.24			3.15	2.87	10.58	11.03	9.98
DOPA-P2	455.11	11.19	20.55	3.08			2.89	3.53	10.87	9.87	10.87
DOPA-P1@P2	455.11	11.98	21.76	3.83			3.56	3.02	9.99	9.62	10.52
							3.112
							1.08682	1.05466	3.63344	3.59807	3.85209
							0.829582	0.893891	3.17685	3.29582	3.54662
							1.01286	0.92283	3.40193	3.54662	3.209
							0.92926	1.13505	3.49518	3.17363	3.49518
							1.14469	0.971061	3.21222	3.09325	3.38264

## Sheet: IF-iNOS
	Area	Mean	StdDev	%Area			TIO2	DOPA	DOPA-P1	DOPA-P2	DOPA-P1@P2
TIO2	455.11	5.25	28.93	1.71		Mean	5.25	4.61	1.94	1.69	1.52
DOPA	455.11	4.61	27.03	1.6			5.55	5.62	1.52	1.92	1.82
DOPA-P1	455.11	1.94	13.82	0.4			4.82	5.36	1.691	1.59	1.84
DOPA-P2	455.11	1.69	11.93	0.3			5.03	5.46	1.95	1.58	1.86
DOPA-P1@P2	455.11	1.52	11.14	0.21			5.23	5.03	1.54	1.98	1.68
							5.176
							1.01351	0.889961	0.374517	0.326255	0.293436
							1.07143	1.08494	0.293436	0.370656	0.351351
							0.930502	1.03475	0.326448	0.30695	0.355212
							0.971042	1.05405	0.376448	0.305019	0.359073
							1.00965	0.971042	0.297297	0.382239	0.324324
