# Supplementary material for: Peptide-based Self-adaptive Implant Coating Sequentially Regulates Bone Regeneration to Enhance Interfacial Osseointegration
Source: Research Square preprint supplement (doi:10.21203/rs.3.rs-5132912/v1), 2024-10-01
Supplement: Supplementary file 1077 [file Figure 4.xlsx]

## Sheet: IF-CD86
CD86	TiO2	DOPA	P1	P2	P1@P2						Area	%Area	MinThr	MaxThr
	10.89	12.98	3.04	4.09	3.82					1	0.44	10.89	70	140
	12.94	10.88	2.66	3.66	4.21					2	0.57	12.98	70	140
	12.88	12.84	3.45	2.98	4.55					3	0.13	3.04	70	140
	11.01	9.98	2.82	4.05	3.02					4	0.18	4.09	70	140
	9.87	12.02	3.24	3.33	3.12					5	0.12	3.82	70	140
	11.518	11.74	3.042	3.622	3.744

## Sheet: IF-CD206
CD206	TiO2	DOPA	P1	P2	P1@P2					Area	%Area	MinThr	MaxThr
	1.28	1.65	6.13	6.34	8.29				1	0.06	1.28	70	140
	1.61	1.33	7.22	7.25	9.35				2	0.03	1.65	70	140
	1.14	1.21	7.44	8.61	8.01				3	0.27	6.13	70	140
	1.55	1.55	6.04	6.03	7.09				4	0.24	6.34	70	140
	1.09	1.44	8.09	6.88	9.06				5	0.37	8.29	70	140
	1.334	1.436	6.984	7.022	8.36

## Sheet: HE
Fibrous Th(μm)	TiO2	DOPA	P1	P2	P1@P2
	545.5	429.1	121	184.1	230.4
	597.1	487	165.7	100.6	209.4
	495.6	464.1	73.1	198.1	122.2
	592.7	452.4	170.1	98.8	85.9
	458.4	518.7	94.7	88.4	115.7
	537.86	470.26	124.92	134	152.72

## Sheet: IL-10
IL-10	TiO2	DOPA	P1	P2	P1@P2					Area	%Area
	1.97	3.39	11.94	12.98	16.39				1	3.67	1.97
	2.59	3.01	9.28	15.28	15.01				2	3.83	3.39
	3.66	2.41	15.25	14.89	12.33				3	3.06	11.94
	2.21	2.98	9.99	15.05	15.56				4	3.74	12.98
	1.99	3.55	12.04	10.88	13.44				5	3.64	17.39
	2.484	3.068	11.7	13.816	14.546

## Sheet: TNF-α
	TiO2	DOPA	P1	P2	P1@P2					Area	%Area
TNF-α	30.94	29.06	6.57	6.24	4.38				1	3.34	30.94
	26.84	33.66	4.21	6.55	3.22				2	3.22	29.06
	33.21	27.88	8.22	4.88	6.11				3	3.43	6.57
	25.29	26.55	6.33	5.71	6.41				4	3.35	6.24
	35.44	29.22	7.01	8.2	4.66				5	3.4	4.38
	30.344	29.274	6.468	6.316	4.956
