# Supplementary material for: Peptide-based Self-adaptive Implant Coating Sequentially Regulates Bone Regeneration to Enhance Interfacial Osseointegration
Source: Research Square preprint supplement (doi:10.21203/rs.3.rs-5132912/v1), 2024-10-01
Supplement: Supplementary file 1081 [file Figure 5+Figure S5.xlsx]

## Sheet: Transwell+wound+tube
	Transwell-间接 24h						Transwell-直接 24h
	TIO2	DOPA	DOPA-P1	DOPA-P2	DOPA-P1@P2		TIO2	DOPA	DOPA-P1	DOPA-P2	DOPA-P1@P2
	88	115	252	263	255		75	86	264	90	284
	70	90	230	240	252		81	72	255	70	239
	82	75	230	231	231		74	76	249	71	241
	80	93.3333	237.333	244.667	246		76.6667	78	256	77	254.667
	HH-间接						HH-直接
	TIO2	DOPA	DOPA-P1	DOPA-P2	DOPA-P1@P2		TIO2	DOPA	DOPA-P1	DOPA-P2	DOPA-P1@P2
0h	431	429	432	465	468		693.01	715.07	727.02	688.03	735.02	0h
24h	252	264	120	180	144		401.02	393.86	129.06	427.03	164.25	24h
	0.415313	0.384615	0.722222	0.612903	0.692308		0.421336	0.449201	0.822481	0.379344	0.776537
	41.5313	38.4615	72.2222	61.2903	69.2308		42.1336	44.9201	82.2481	37.9344	77.6537
	38.12	45.22	66.21	70.01	77.25		37.25	39.41	72.25	46.74	83.56
	36.36	32.41	75.44	63.14	61.56		44.36	41.25	85.25	43.58	81.66
	38.6704	38.6972	71.2907	64.8134	69.3469		41.2479	41.86	79.916	42.7515	80.9579
														TIO2	DOPA	DOPA-P1	DOPA-P2	DOPA-P1@P2
	CG-间接													CG-间接
	TIO2	DOPA	DOPA-P1	DOPA-P2	DOPA-P1@P2									TIO2			DOPA			DOPA-P1			DOPA-P2			DOPA-P1@P2
4h-Junctions	56	67	140	125	131		0.994142	1.18942	2.48535	2.21907	2.32558		4h-J	0.994142	0.905379	1.10066	1.18942	1.10066	1.18942	2.48535	2.14806	2.36109	2.21907	2.21907	2.52086	2.32558	2.4676	2.18356
	51	62	121	125	139		0.905379	1.10066	2.14806	2.21907	2.4676		24h-J	1.07423	0.948418	0.977451	0.803252	1.08391	0.967773	1.7807	1.82909	1.71296	1.74199	1.92587	1.63554	2.10975	1.74199	1.76135
	62	67	133	142	123		1.10066	1.18942	2.36109	2.52086	2.18356
	56.3333	65.3333	131.333	130.667	131
4h-Branches	69	84	113	105	111		0.962746	1.17204	1.57667	1.46505	1.54877		4h-B	0.962746	1.0046	1.03251	1.17204	1.07437	1.06042	1.57667	1.42319	1.67434	1.46505	1.70225	1.56272	1.54877	1.7162	1.50691
	72	77	102	122	123		1.0046	1.07437	1.42319	1.70225	1.7162		24h-B	1.00981	0.907361	1.08298	0.848822	0.99517	1.20006	1.5952	1.69764	1.50739	1.46349	1.66837	1.50739	1.66837	1.75618	1.53666
	74	76	120	112	108		1.03251	1.06042	1.67434	1.56272	1.50691
	71.6667	79	111.667	113	114
24h-Junctions	111	83	184	180	218		1.07423	0.803252	1.7807	1.74199	2.10975
	98	112	189	199	180		0.948418	1.08391	1.82909	1.92587	1.74199
	101	100	177	169	182		0.977451	0.967773	1.71296	1.63554	1.76135
	103.333	98.3333	183.333	182.667	193.333
24h-Branches	69	58	109	100	114		1.00981	0.848822	1.5952	1.46349	1.66837
	62	68	116	114	120		0.907361	0.99517	1.69764	1.66837	1.75618
	74	82	103	103	105		1.08298	1.20006	1.50739	1.50739	1.53666
	68.3333	69.3333	109.333	105.667	113
	CG-直接													CG-直接
	TIO2	DOPA	DOPA-P1	DOPA-P2	DOPA-P1@P2									TIO2			DOPA			DOPA-P1			DOPA-P2			DOPA-P1@P2
													4h-J	0.82	1.21	0.97	1.11	1.09	0.71	2.23	1.98	2.46	1.22	0.89	0.89	2.51	2.3	2.11
4h-Junctions													24h-J	0.75	1.25	1.01	1.23	1.14	0.99	3.25	2.88	2.99	1.24	1.32	1.02	3.33	2.98	3.01
													4h-B	0.71	1.18	1.11	0.82	0.93	1.15	1.56	1.61	1.44	0.91	0.91	1.22	1.75	1.56	1.42
4h-Branches													24h-B	0.88	1.22	0.91	0.92	0.91	1.18	1.66	1.68	1.44	1.12	1.22	1.05	1.77	1.55	1.64
24h-Junctions
24h-Branches

## Sheet: WB
	TiO2	DOPA	DOPA-P1	DOPA-P2	DOPA-P1@P2			TiO2	DOPA	DOPA-P1	DOPA-P2	DOPA-P1@P2
VEGF	35475.3	51093	107337	97640.3	118915		FGF-2	64914.6	58257.4	96342.3	117588	102225
	32784.2	39749.2	96216	112563	96881.9			56877.7	65338.3	112297	121487	105875
	50236.9	39667.9	109764	88756.6	96583.2			69897.3	51487.2	115866	106225	120258
β-actin（Avg.）	121666	119084	116590	116798	115702		β-actin（Avg.）	121666	119084	116590	116798	115702
VEGF/β-actin	0.29158	0.429052	0.920641	0.835973	1.02777		FGF-2/β-actin	0.533549	0.489215	0.826335	1.00676	0.883516
	0.269461	0.333793	0.825252	0.963739	0.837337			0.467491	0.548676	0.963182	1.04014	0.915066
	0.412909	0.33311	0.941453	0.759912	0.834756			0.574503	0.432362	0.993789	0.909476	1.03938
	0.32465	0.365318	0.895782	0.853208	0.899953			0.525181	0.490084	0.927769	0.98546	0.945986
COL-I	54259.6	76649.9	130865	112851	117239		OPN	54444.8	52433.5	97772.9	108468	111417
	68752.2	84587.3	130257	120823	125369			43687.3	46278.3	98369.3	123884	102523
	66538.9	70785.3	121258	106358	106358			43875.2	64369.9	118236	112321	125587
β-actin（Avg.）	118684	124799	120595	109923	110737		β-actin（Avg.）	118684	124799	120595	109923	110737
COL-I/β-actin	0.457176	0.614185	1.08516	1.02664	1.05871		OPN/β-actin	0.458736	0.420142	0.810757	0.986765	1.00614
	0.579287	0.677786	1.08013	1.09917	1.13213			0.368096	0.370821	0.815702	1.12701	0.925824
	0.560637	0.567192	1.0055	0.967572	0.960456			0.36968	0.515787	0.980443	1.02182	1.1341
	0.532367	0.619721	1.05693	1.03113	1.05043			0.398837	0.435583	0.868967	1.0452	1.02202

## Sheet: ALP
TIO2	DOPA	P1	P2	P1@P2				Area	%Area	MinThr	MaxThr
8.28	8.74	54.87	55.54	69.33			TIO2	0.07	8.28	0	140
8.36	5.21	58.85	60.22	56.57			DOPA	0.07	8.74	0	140
4.21	7.36	48.28	51.01	56.68			P1	0.47	54.87	0	140
6.95	7.10333	54	55.59	60.86			P2	0.49	55.54	0	140
							P1@P2	0.6	69.33	0	140

## Sheet: ARS
TIO2	DOPA	P1	P2	P1@P2				Area	%Area	MinThr	MaxThr
22.56	21.33	63.84	66.01	57.89			TIO2	0.21	22.56	0	127
18.21	21.35	56.21	70.52	63.57			DOPA	0.18	21.33	0	127
24.36	17.88	64.87	61.25	58.88			P1	0.55	63.84	0	127
21.71	20.1867	61.64	65.9267	60.1133			P2	0.53	66.01	0	127
							P1@P2	0.53	57.89	0	113

## Sheet: IF-OPN
	TIO2	DOPA	P1	P2	P1@P2
间接OPN	1.199	1.04	2.111	1.934	1.835
	0.846	1.217	1.789	1.906	1.921
	0.946	0.994	2.233	1.805	2.167
	0.866	0.969	2.054	2.218	2.132
	1.142	1.124	1.801	2.29	2.239
	4.999	5.344	9.988	10.153	10.294
