# Supplementary material for: Peptide-based Self-adaptive Implant Coating Sequentially Regulates Bone Regeneration to Enhance Interfacial Osseointegration
Source: Research Square preprint supplement (doi:10.21203/rs.3.rs-5132912/v1), 2024-10-01
Supplement: Supplementary file 1085 [file Figure 6+Figure S6.xlsx]

## Sheet: WB
	TiO2	DOPA	DOPA-P1	DOPA-P2	DOPA-P1@P2			TiO2	DOPA	DOPA-P1	DOPA-P2	DOPA-P1@P2
VEGF	49890.1	58251.2	135257	72434.8	113099		FGF-2	39871	37114	116757	33441.2	89116.1
	46879.7	58687.2	115653	66635.2	128365			39587.2	31874.3	108369	30587.3	112875
	68741.4	42741.3	132251	58365.2	128258			50214.3	39258.4	100258	38741.4	110746
β-actin（Avg.）	119130	106150	105347	104645	119527		β-actin（Avg.）	119130	106150	105347	104645	119527
VEGF/β-actin	0.418786	0.548761	1.28392	0.692193	0.946224		FGF-2/β-actin	0.334683	0.349636	1.1083	0.319567	0.745574
	0.393515	0.552869	1.09783	0.636772	1.07395			0.332302	0.300275	1.02869	0.292294	0.944351
	0.577026	0.402649	1.25538	0.557743	1.07305			0.421507	0.369837	0.951694	0.370216	0.92654
	0.463109	0.501426	1.21238	0.628903	1.03107			0.362831	0.339916	1.02956	0.327359	0.872155
COL-I	32406.3	31260.6	48373	109158	108441		OPN	37791.9	37230.7	50774.9	112767	110827
	26657.4	31895.2	36257.3	128874	108583			32568.6	40587.4	40754.3	120792	92365.3
	38582.1	24587.3	40257.9	109587	88874.6			42587.3	33526.6	40875.3	103366	93258.3
β-actin（Avg.）	105072	97177.9	105653	109491	98478.8		β-actin（Avg.）	105072	97177.9	105653	109491	98478.8
COL-I/β-actin	0.308419	0.321684	0.457849	0.996959	1.10116		OPN/β-actin	0.359675	0.383119	0.480584	1.02992	1.12539
	0.253705	0.328215	0.343174	1.17702	1.10261			0.309963	0.41766	0.385738	1.10322	0.93792
	0.367196	0.253013	0.38104	1.00088	0.902474			0.405314	0.345002	0.386884	0.944057	0.946989
	0.309773	0.30097	0.394021	1.05829	1.03541			0.358317	0.381927	0.417735	1.02573	1.00343

## Sheet: ALP
TIO2	DOPA	P1	P2	P1@P2
6.58	8.14	10.24	60.35	68.25
6.24	6.32	7.05	59.88	64.82
4.21	6.99	7.88	65.87	60.25
5.67667	7.15	8.39	62.0333	64.44

## Sheet: ARS
TIO2	DOPA	P1	P2	P1@P2
15.53	14.36	15.23	50.55	48.69
11.21	15.96	16.25	52.26	48.89
14.25	16.08	13.58	45.98	56.66
13.6633	15.4667	15.02	49.5967	51.4133

## Sheet: IF-COL-I
	TIO2	DOPA	P1	P2	P1@P2
间接COL-I	0.992	1.02	1.071	2.662	2.815
	0.967	1.099	1.089	2.934	2.915
	0.992	0.884	0.9033	2.533	2.386
	0.859	0.943	1.054	2.614	2.966
	1.189	0.994	0.791	2.99	2.567
	4.999	4.94	4.9083	13.733	13.649
