# Supplementary material for: Peptide-based Self-adaptive Implant Coating Sequentially Regulates Bone Regeneration to Enhance Interfacial Osseointegration
Source: Research Square preprint supplement (doi:10.21203/rs.3.rs-5132912/v1), 2024-10-01
Supplement: Supplementary file 1089 [file Figure 8+Figure S9.xlsx]

## Sheet: Micro-CT
	TIO2	DOPA	P1	P2	P1@P2			BMD (g/cm3)	BV/TV (%)	BS/BV (1/mm)	Tb.N (1/mm)	Tb.Th（mm）	Tb.Sp（mm）
BMD (g/cm3)	0.55218	0.49972	0.84215	0.89387	1.24445			0.453556	21.1594	22.2996	1.33658	0.15831	1.19945
	0.51587	0.57314	0.76192	0.91117	1.35146			0.46723	36.1066	12.9416	1.4687	0.24584	1.36573
	0.57126	0.52887	0.87698	0.92874	1.1888			0.474569	30.5955	14.8503	1.38683	0.220615	1.2768
	0.59327	0.57495	0.90225	1.01887	1.33293			0.518666	38.3868	11.5607	1.51922	0.252673	1.42125
	0.53247	0.59622	0.89758	1.04873	1.44279			0.447349	25.2767	17.63	1.26284	0.200158	1.2001
	0.55301	0.55458	0.856176	0.960276	1.31209
BV/TV (%)	20.1479	21.1148	33.1174	39.7875	59.4122			0.462846	30.8801	14.6944	1.36824	0.225692	1.28226
	18.7741	21.2588	34.4753	44.1121	62.2526			0.460224	34.8475	13.2205	1.4685	0.237301	1.34884
	19.1146	23.1479	38.1785	42.5531	57.3421			0.481846	28.9498	15.3445	1.33217	0.217313	1.24854
	23.7271	18.1417	32.1646	36.5579	65.5579			0.551218	39.6425	10.5216	1.53623	0.25805	1.48658
	18.1512	21.179	29.7721	45.1488	62.6529			0.468276	32.9608	13.7467	1.4484	0.227566	1.31658
	19.983	20.9684	33.5416	41.6319	61.4435
Tb.N (1/mm)	0.70118	0.68557	0.91853	1.36621	1.52563			0.509355	30.3712	14.9846	1.3495	0.225054	1.28361
	0.57547	0.68156	0.98117	1.21922	1.46452			0.474647	33.7227	14.0482	1.4885	0.226555	1.32731
	0.61202	0.59996	1.08593	1.18845	1.58452			0.472207	32.3772	13.4371	1.41442	0.228907	1.33015
	0.62141	0.65147	1.11578	1.36879	1.45687			0.511898	33.8879	12.8121	1.41798	0.238987	1.30803
	0.67471	0.72785	1.17896	1.36848	1.41526			0.476062	31.0098	14.4204	1.38166	0.224439	1.30504
	0.636958	0.669282	1.05607	1.30223	1.48936
Tb.Th（mm）	44.1587	56.2587	94.3587	110.876	130.458			0.496091	34.2991	12.5866	1.45594	0.23558	1.37798
	50.2206	51.1179	94.1179	114.886	127.557			0.476373	33.1812	13.1056	1.38992	0.238727	1.32643
	44.1187	45.2478	87.5877	107.224	115.386			0.477805	33.2797	12.7388	1.39643	0.23832	1.34177
	50.1179	49.5879	92.2588	121.554	134.554			0.474238	33.8181	13.3164	1.43814	0.235151	1.31581
	59.7749	53.8853	85.6688	108.888	133.998			0.459645	31.2523	14.4657	1.34749	0.231931	1.28219
	49.6782	51.2195	90.7984	112.685	128.391
Max force（N）	29.86	31.44	53.12	66.55	83.32
	33.13	35.54	50.98	62.47	83.95
	34.22	29.52	42.77	59.83	76.95
	28.66	30.29	49.87	68.78	80.46
	30.88	34.77	52.06	59.97	85.92
	31.35	32.312	49.76	63.52	82.12

## Sheet: MAR
TIO2	DOPA	P1	P2	P1@P2
6.886	6.384	11.033	13.981	17.383	um
5.49	7.099	14.704	12.176	18.021
7.106	4.925	11.958	11.021	18.393
5.598	6.577	10.099	10.589	14.211
5.324	6.35	10.705	9.298	13.367
7days
0.983714	0.912	1.57614	1.99729	2.48329	um/d
0.784286	1.01414	2.10057	1.73943	2.57443
1.01514	0.703571	1.70829	1.57443	2.62757
0.799714	0.939571	1.44271	1.51271	2.03014
0.760571	0.907143	1.52929	1.32829	1.90957
0.868686	0.895286	1.6714	1.63043	2.325

## Sheet: BIC
TIO2	DOPA	P1	P2	P1@P2
5.2	6.03	30.81	36.77	63.22
3.72	5.78	26.75	29.85	55.87
3.12	8.54	33.19	36.49	69.78
5.32	6.63	35.25	32.26	56.29
2.88	5.52	28.55	35.65	60.32
4.048	6.5	30.91	34.204	61.096

## Sheet: Maximal force
TiO2	DOPA	DOPA-P1	DOPA-P2	DOPA-P1@P2
29.86	31.44	53.12	66.55	83.32
33.13	35.54	50.98	62.47	83.95
34.22	29.52	42.77	59.83	76.95
28.66	30.29	49.87	68.78	80.46
30.88	34.77	52.06	59.97	85.92

## Sheet: Masson
组别		TIO2	DOPA	P1	P2	P1@P2				Area	%Area
	CVF (%)	11.48	12.32	29.01	27.16	33.15			1	4.42	11.48	Masson
		12.66	12.03	26.55	24.14	34.21			2	4.42	12.32
		10.2	10.22	32.01	27.58	27.81			3	4.42	29.01
		13.11	12.89	28.17	29.33	35.22			4	4.42	27.16
		9.81	10.13	26.58	31.14	35.12			5	4.42	33.15
		11.452	11.518	28.464	27.87	33.102

## Sheet: OPN+COL-I
组别		TIO2	DOPA	P1	P2	P1@P2					Area	%Area
	COL-I	6.13	8.95	25.7	29.93	37.16				1	1.52	6.13	COL-I
		4.22	7.25	22.36	27.88	35.25				2	0.71	8.95
		7.61	6.55	27.36	24.33	31.68				3	0.88	25.7
		5.92	8.17	25.34	30.57	32.68				4	0.97	29.93
		7.64	6.88	25.55	28.69	38.55				5	0.83	37.16
		6.304	7.56	25.262	28.28	35.064
										1	0.37	9.42	OPN
	OPN	9.42	11.3	35.98	31.43	45.49				2	0.35	11.3
		9.52	7.88	30.25	28.33	40.12				3	0.59	35.98
		5.44	8.66	36.12	36.58	39.89				4	0.63	31.43
		11.02	13.01	39.25	29.87	48.25				5	0.97	45.49
		9.12	10.58	38.25	30.55	42.15
		8.904	10.286	35.97	31.352	43.18
