# Supplementary figures and images for: Peptide-based Self-adaptive Implant Coating Sequentially Regulates Bone Regeneration to Enhance Interfacial Osseointegration (part 1 of 6)
Source: Research Square preprint supplement (doi:10.21203/rs.3.rs-5132912/v1), 2024-10-01

Boxplot for FPKM Values

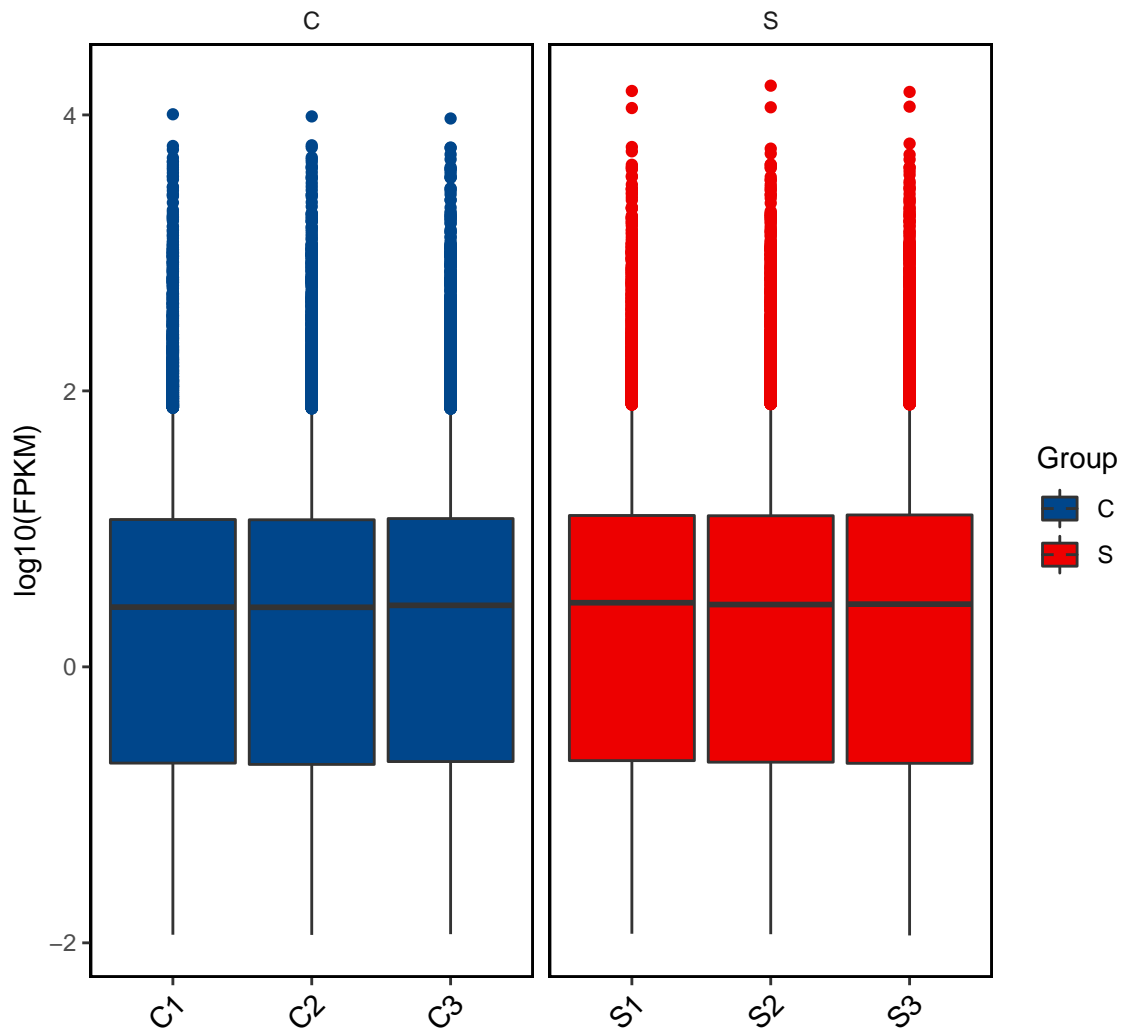

Supplement: Supplementary file 1 [file FPKM_boxplot.pdf › Source data/1.RNA-Seq source data/1.BMSCs/result/1.3.gene_expression/FPKM_boxplot.pdf]

# Gene expression in each sample

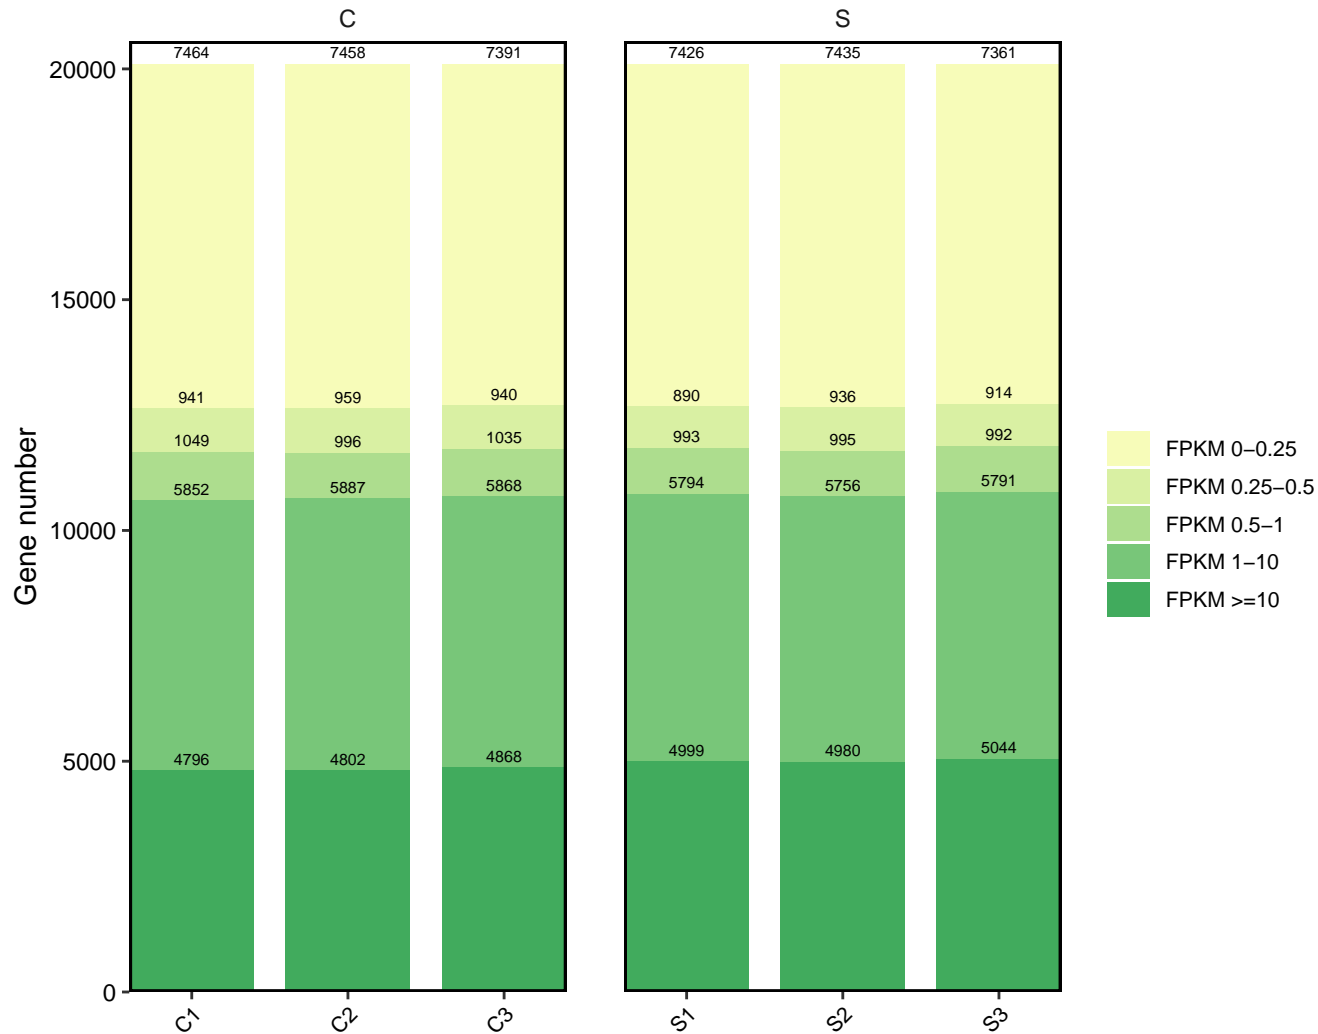

Supplement: Supplementary file 2 [file FPKM_region.pdf › Source data/1.RNA-Seq source data/1.BMSCs/result/1.3.gene_expression/FPKM_region.pdf]

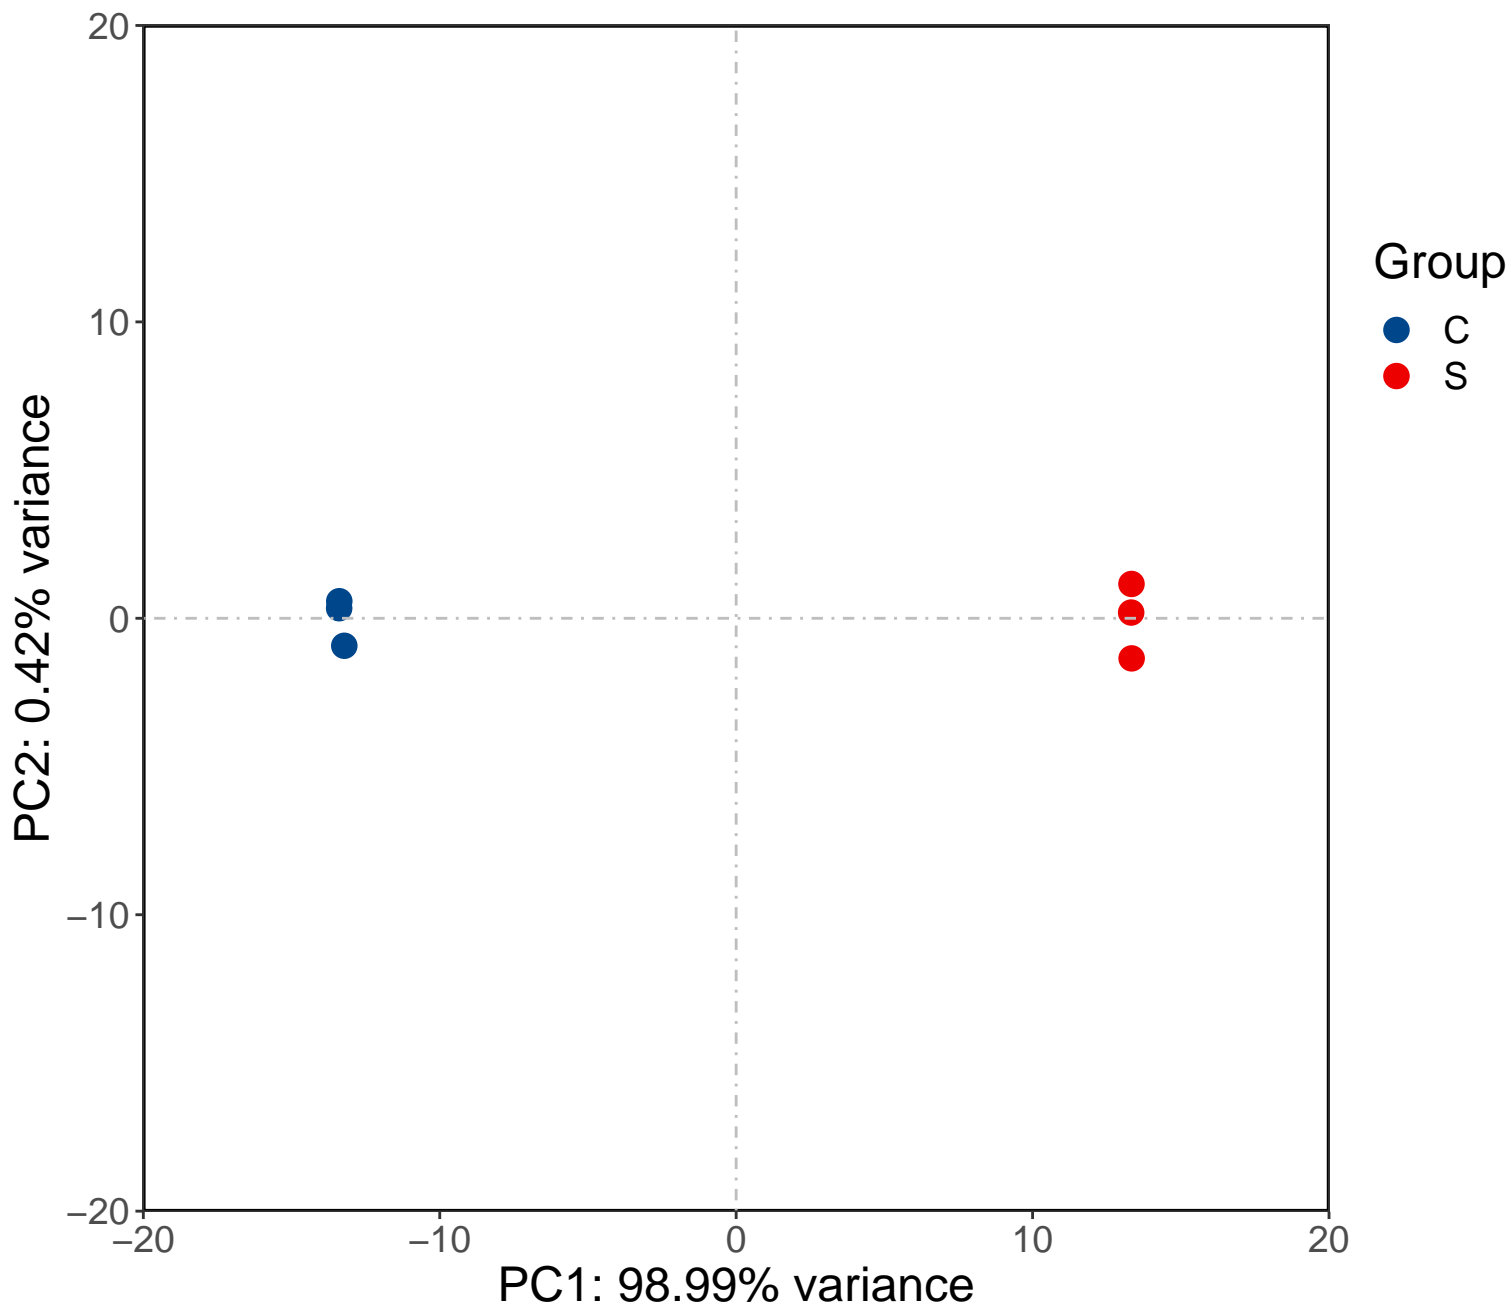

Supplement: Supplementary file 3 [file PCA_1.pdf › Source data/1.RNA-Seq source data/1.BMSCs/result/1.3.gene_expression/PCA_1.pdf]

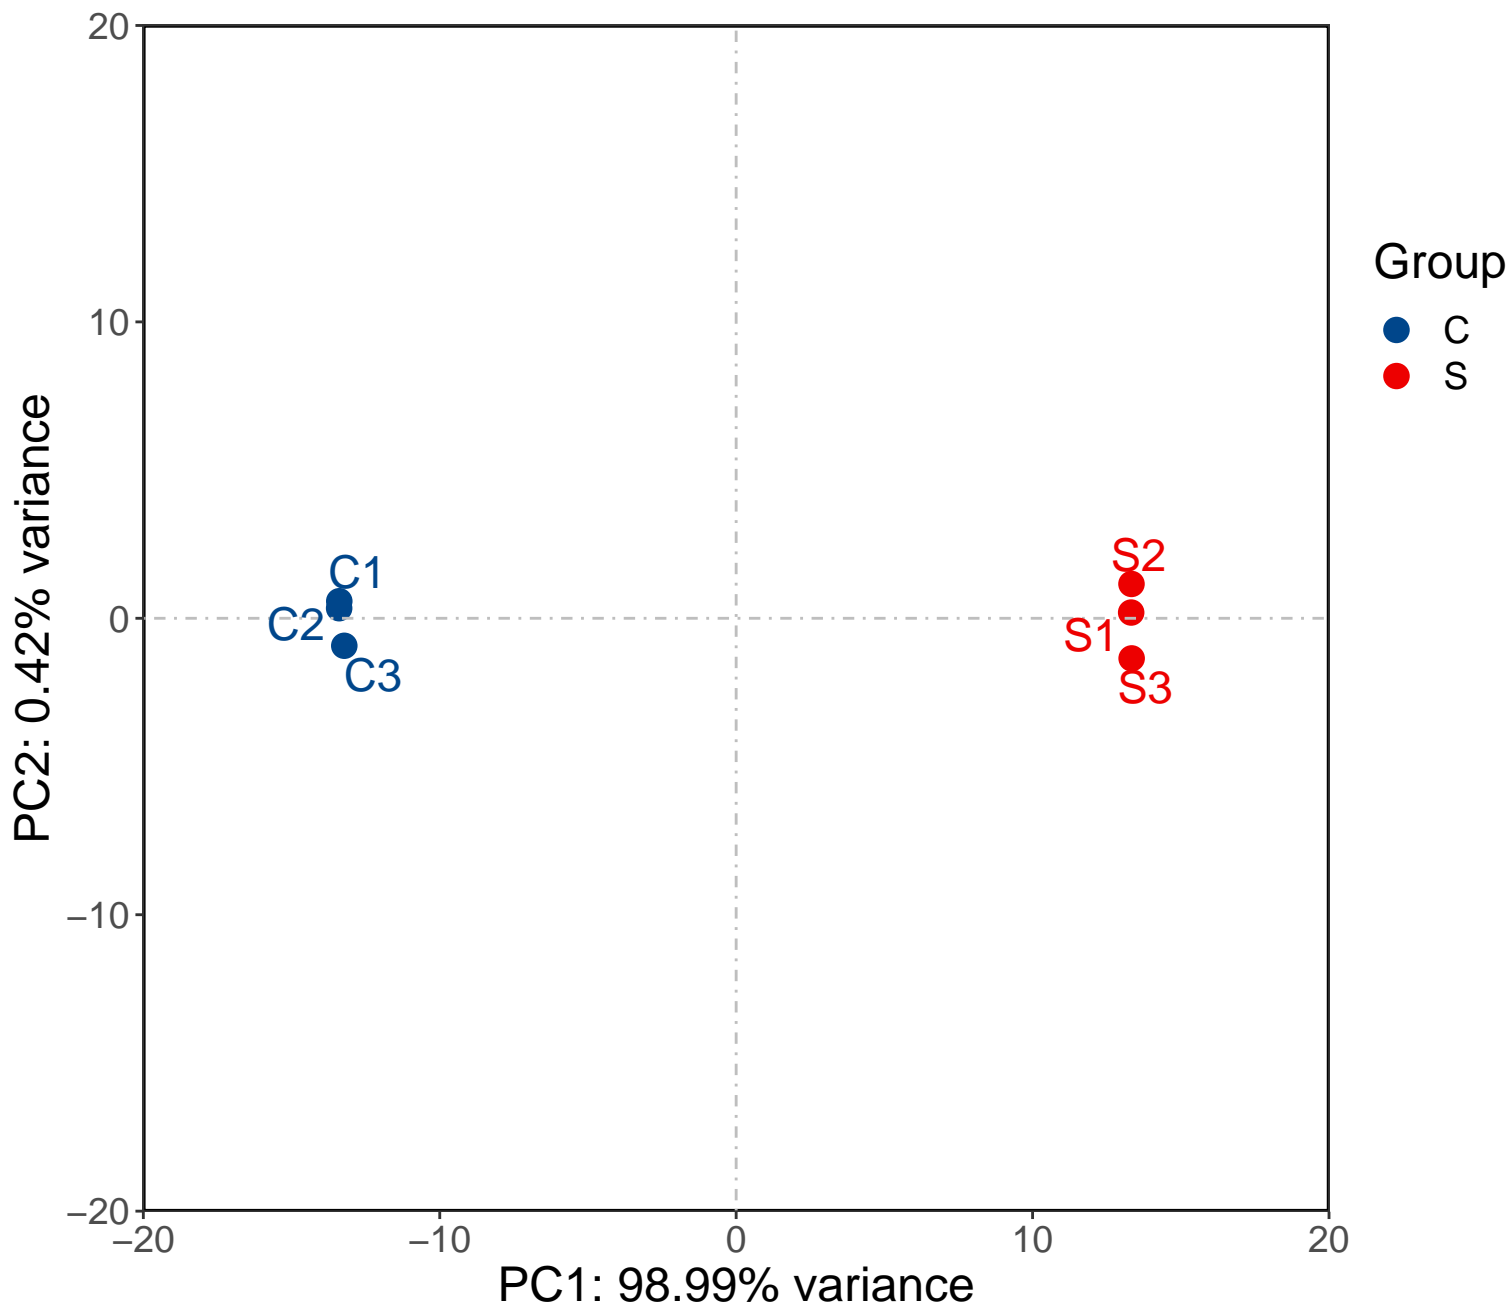

Supplement: Supplementary file 4 [file PCA_2.pdf › Source data/1.RNA-Seq source data/1.BMSCs/result/1.3.gene_expression/PCA_2.pdf]

PCA 3D figure

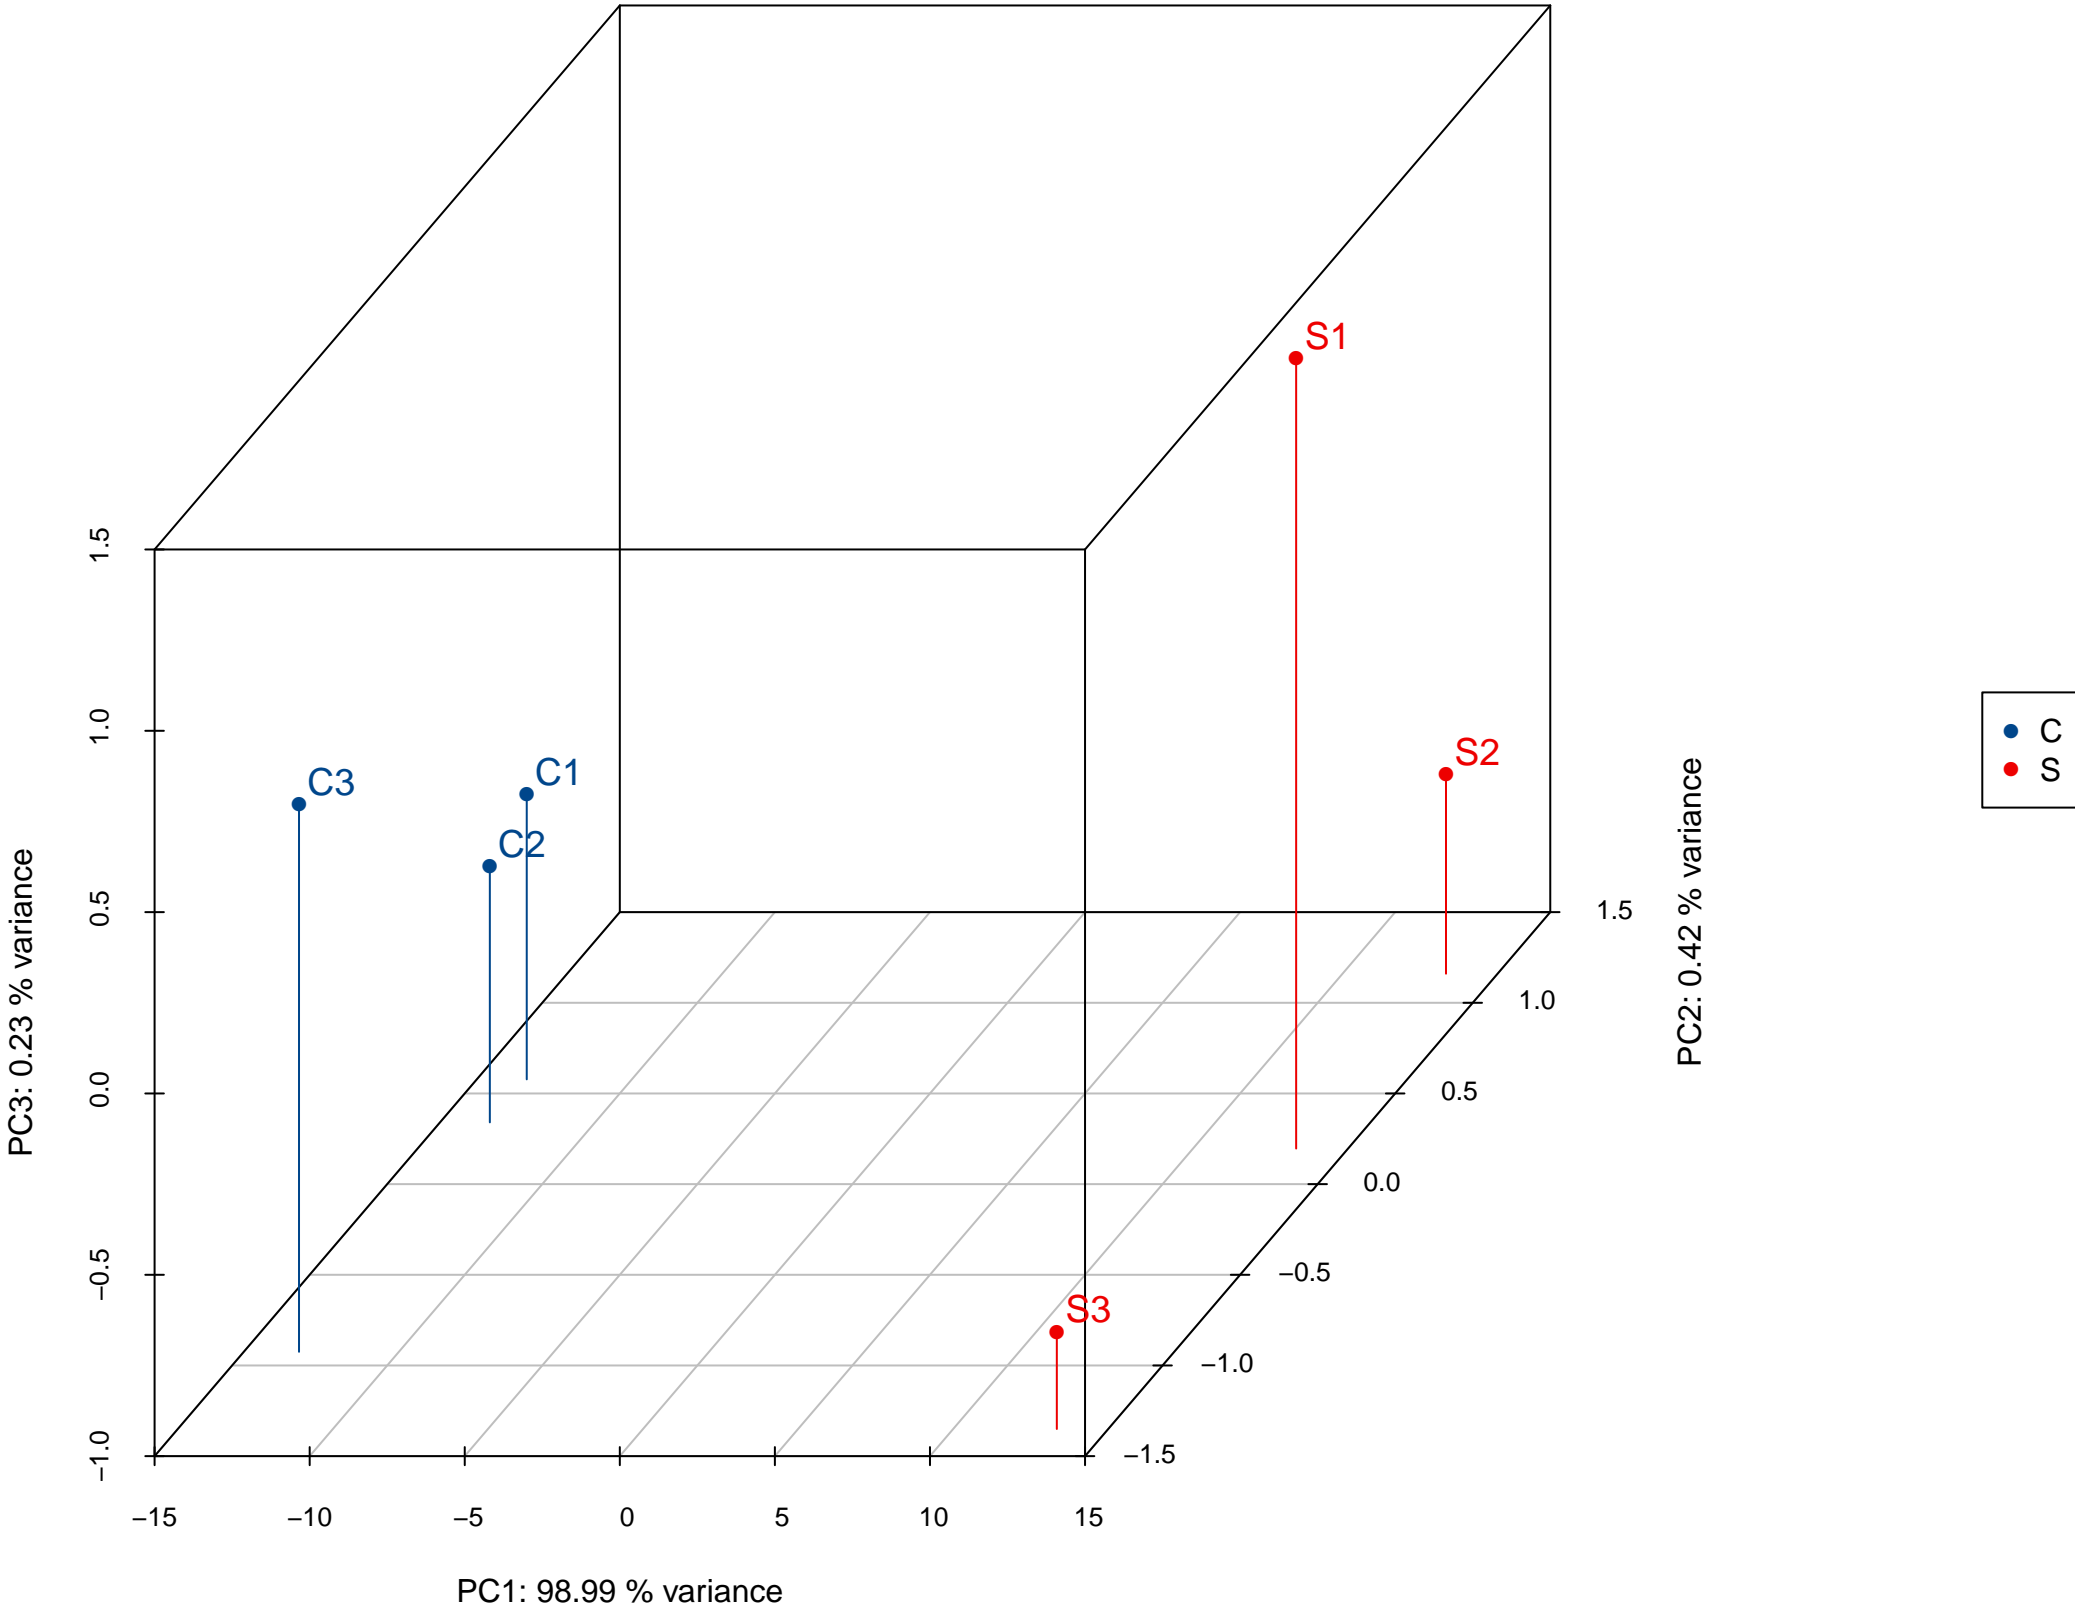

Supplement: Supplementary file 5 [file PCA_3D.pdf › Source data/1.RNA-Seq source data/1.BMSCs/result/1.3.gene_expression/PCA_3D.pdf]

Sample-to-Sample distances

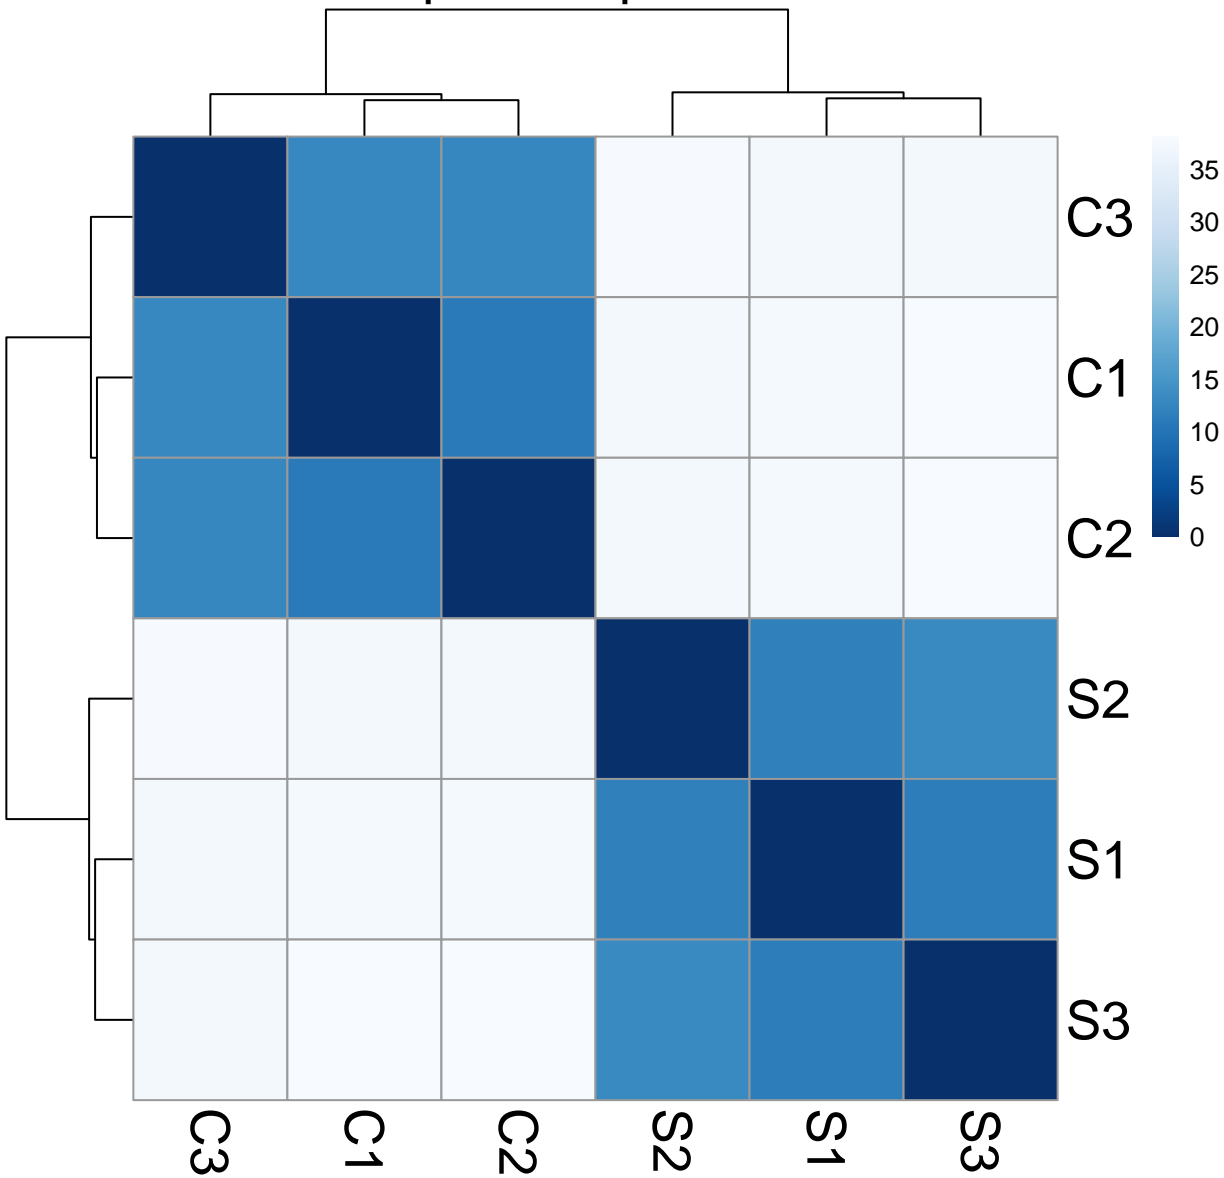

Supplement: Supplementary file 6 [file Sample-to-Sample_distances_heatmap.pdf › Source data/1.RNA-Seq source data/1.BMSCs/result/1.3.gene_expression/Sample-to-Sample_distances_heatmap.pdf]

Gene expression in each sample

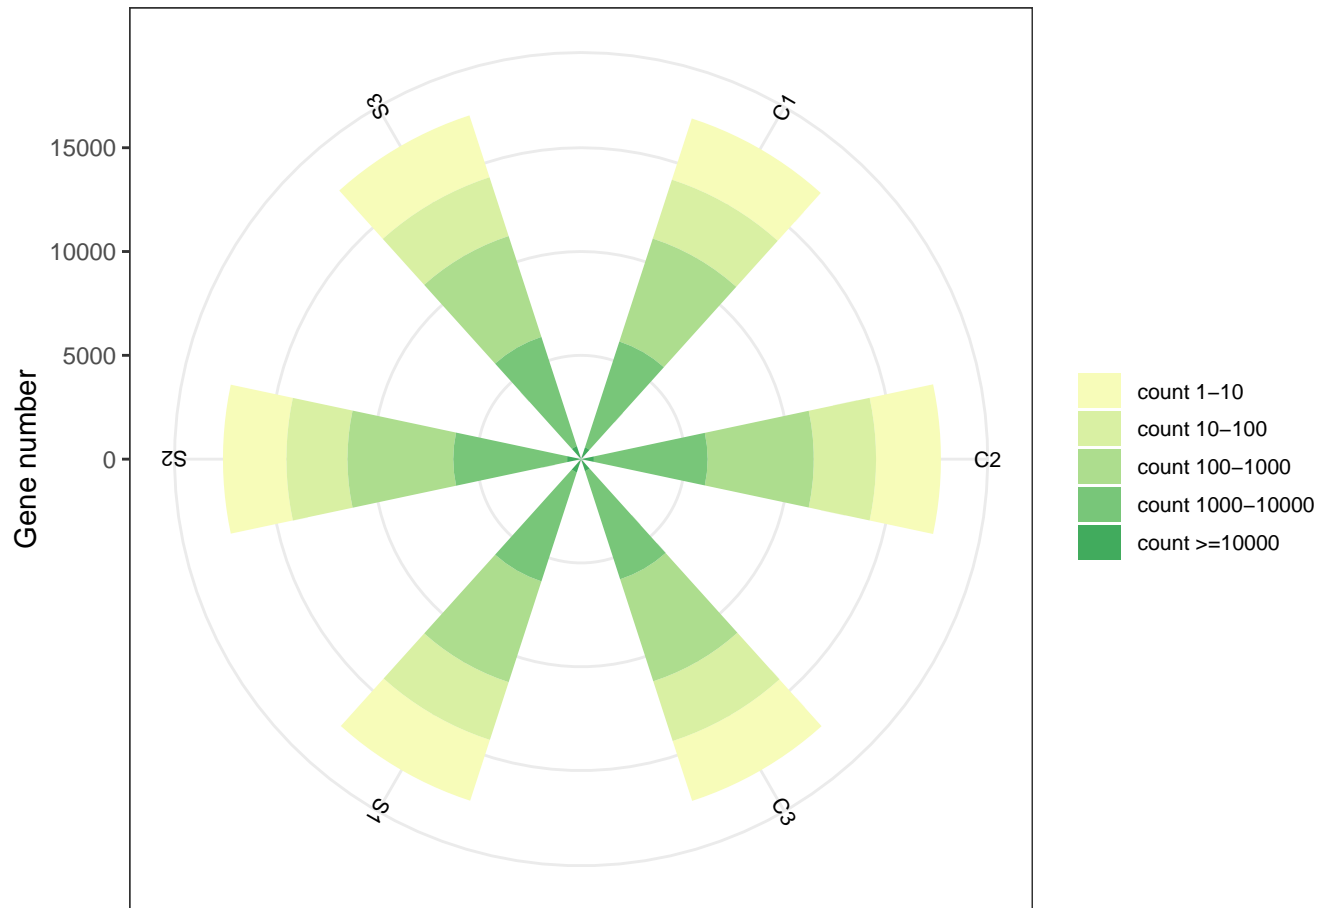

Supplement: Supplementary file 7 [file count_region.pdf › Source data/1.RNA-Seq source data/1.BMSCs/result/1.3.gene_expression/count_region.pdf]

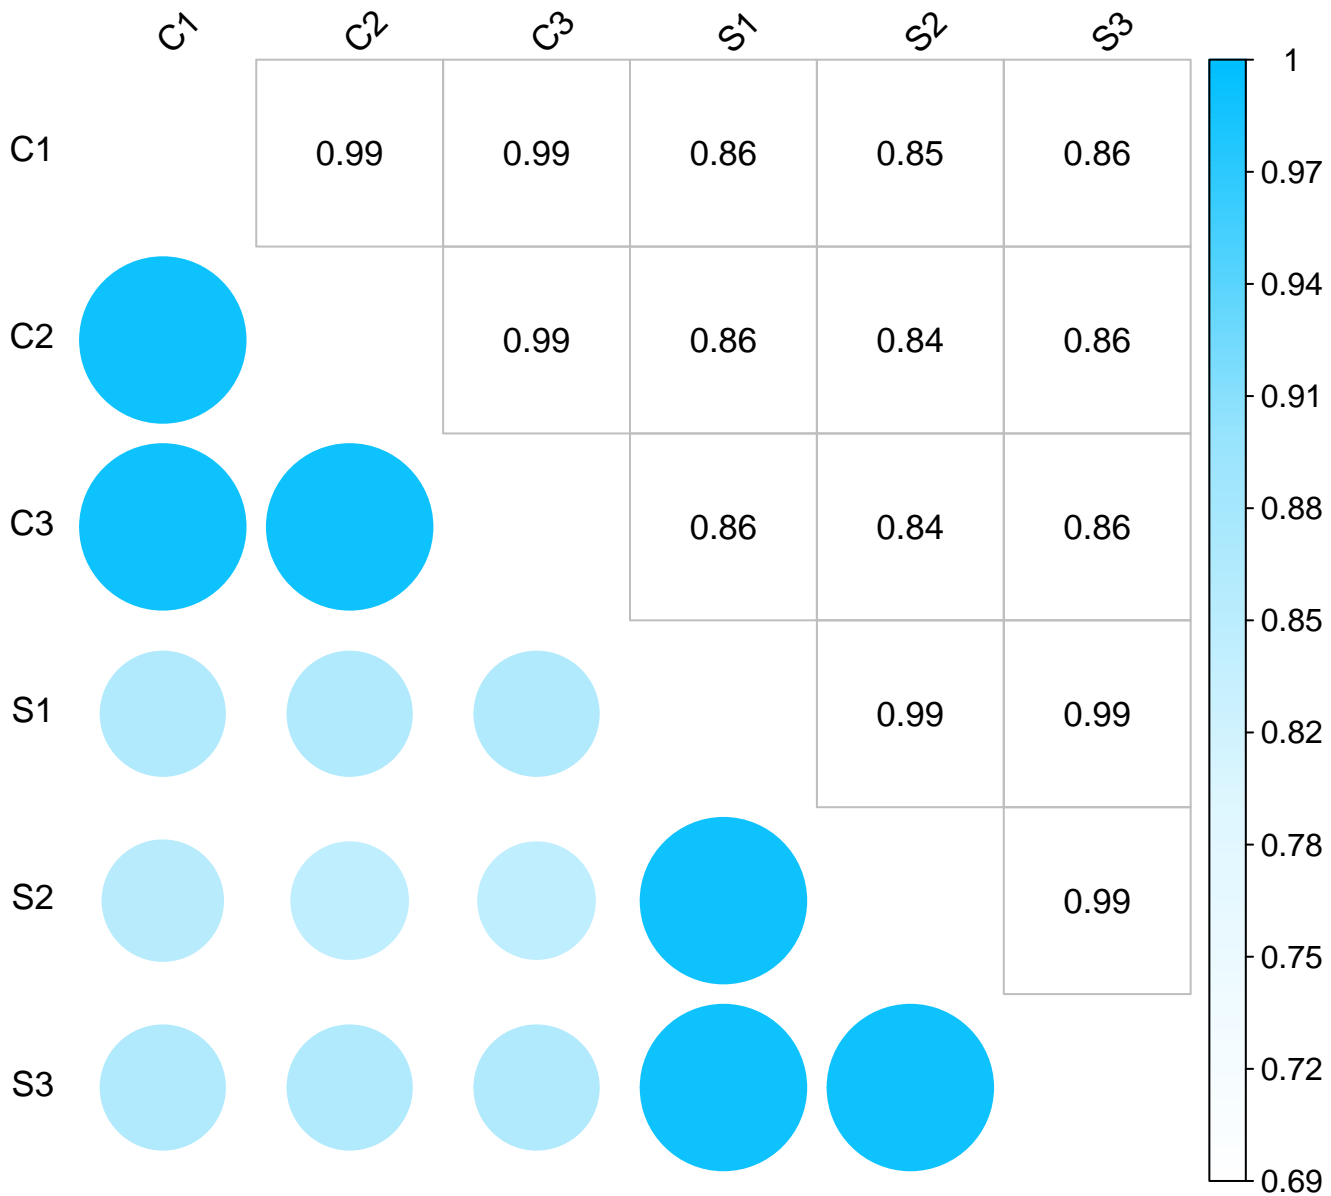

Supplement: Supplementary file 8 [file heatmap-coefficient_matrix.pdf › Source data/1.RNA-Seq source data/1.BMSCs/result/1.3.gene_expression/heatmap-coefficient_matrix.pdf]

# S-vs-C: q-value<0.05 && |log<sub>2</sub> FC|>1

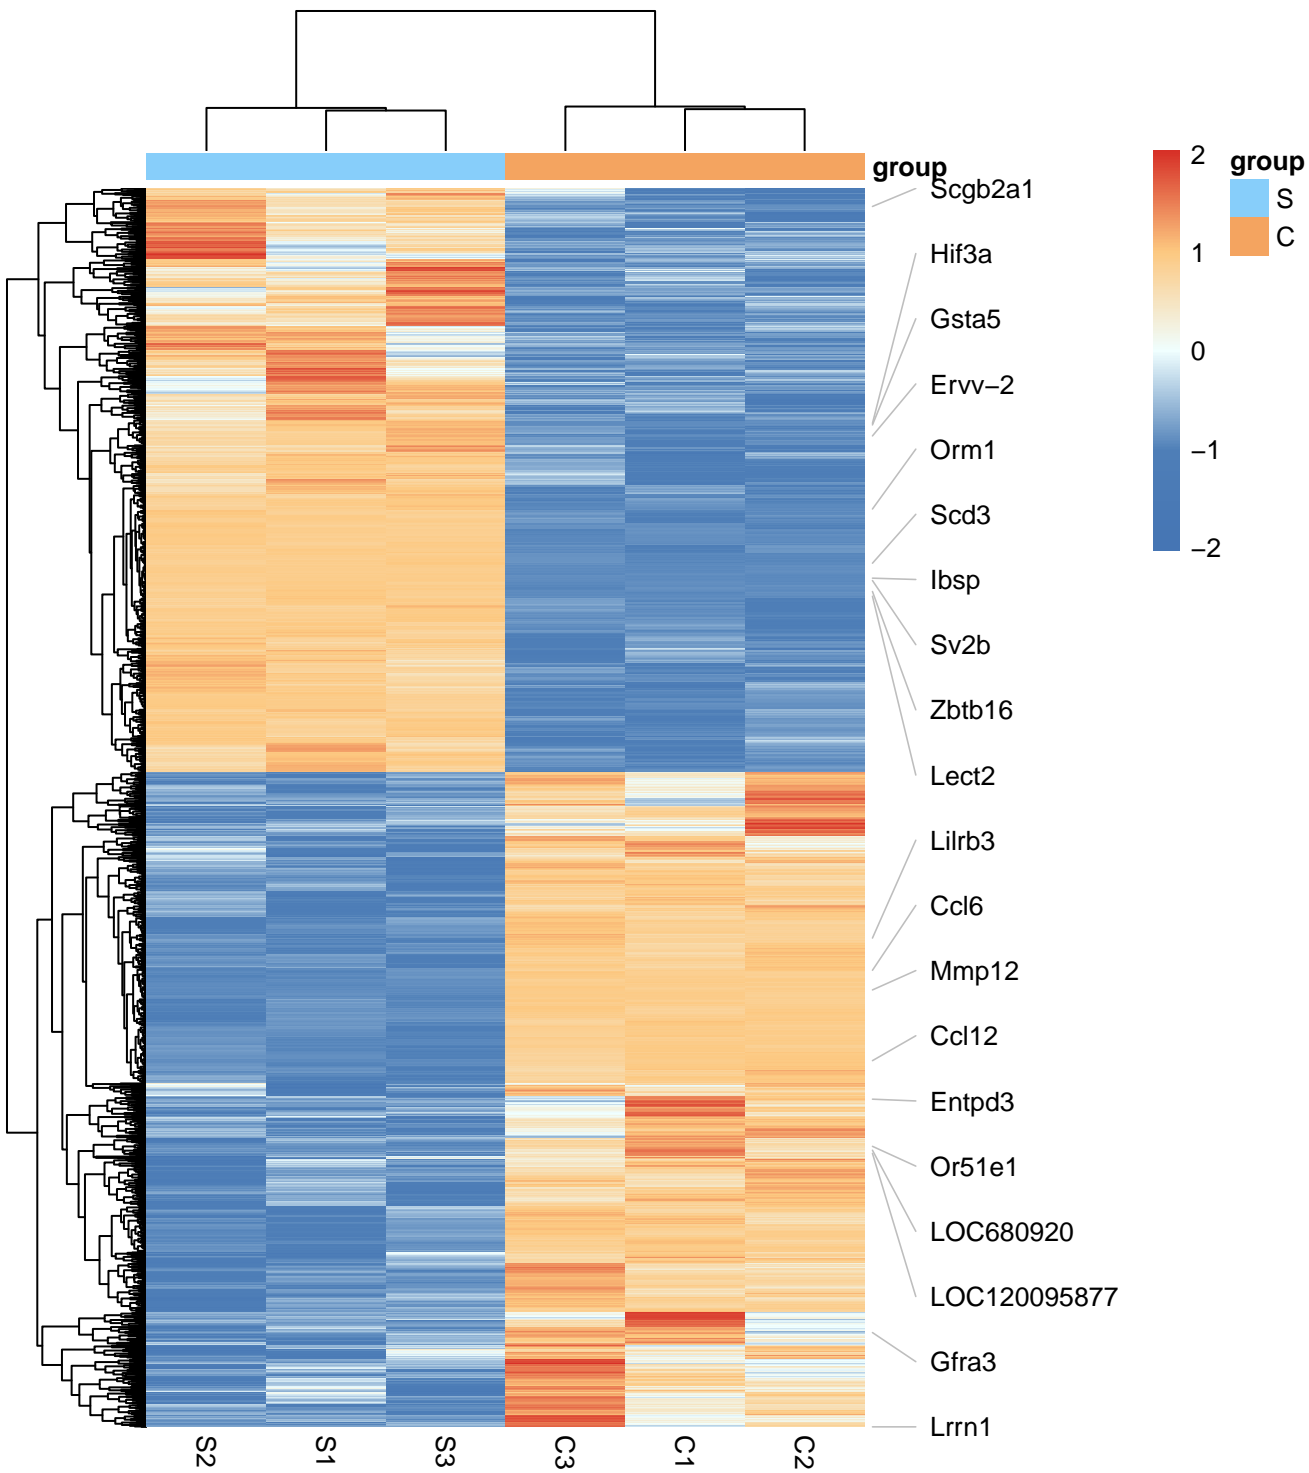

Supplement: Supplementary file 9 [file S-vs-C-heatmap-q-val-0.05-FC-2.gene.pdf › Source data/1.RNA-Seq source data/1.BMSCs/result/1.4.different_expressed_gene/S-vs-C/S-vs-C-heatmap-q-val-0.05-FC-2.gene.pdf]

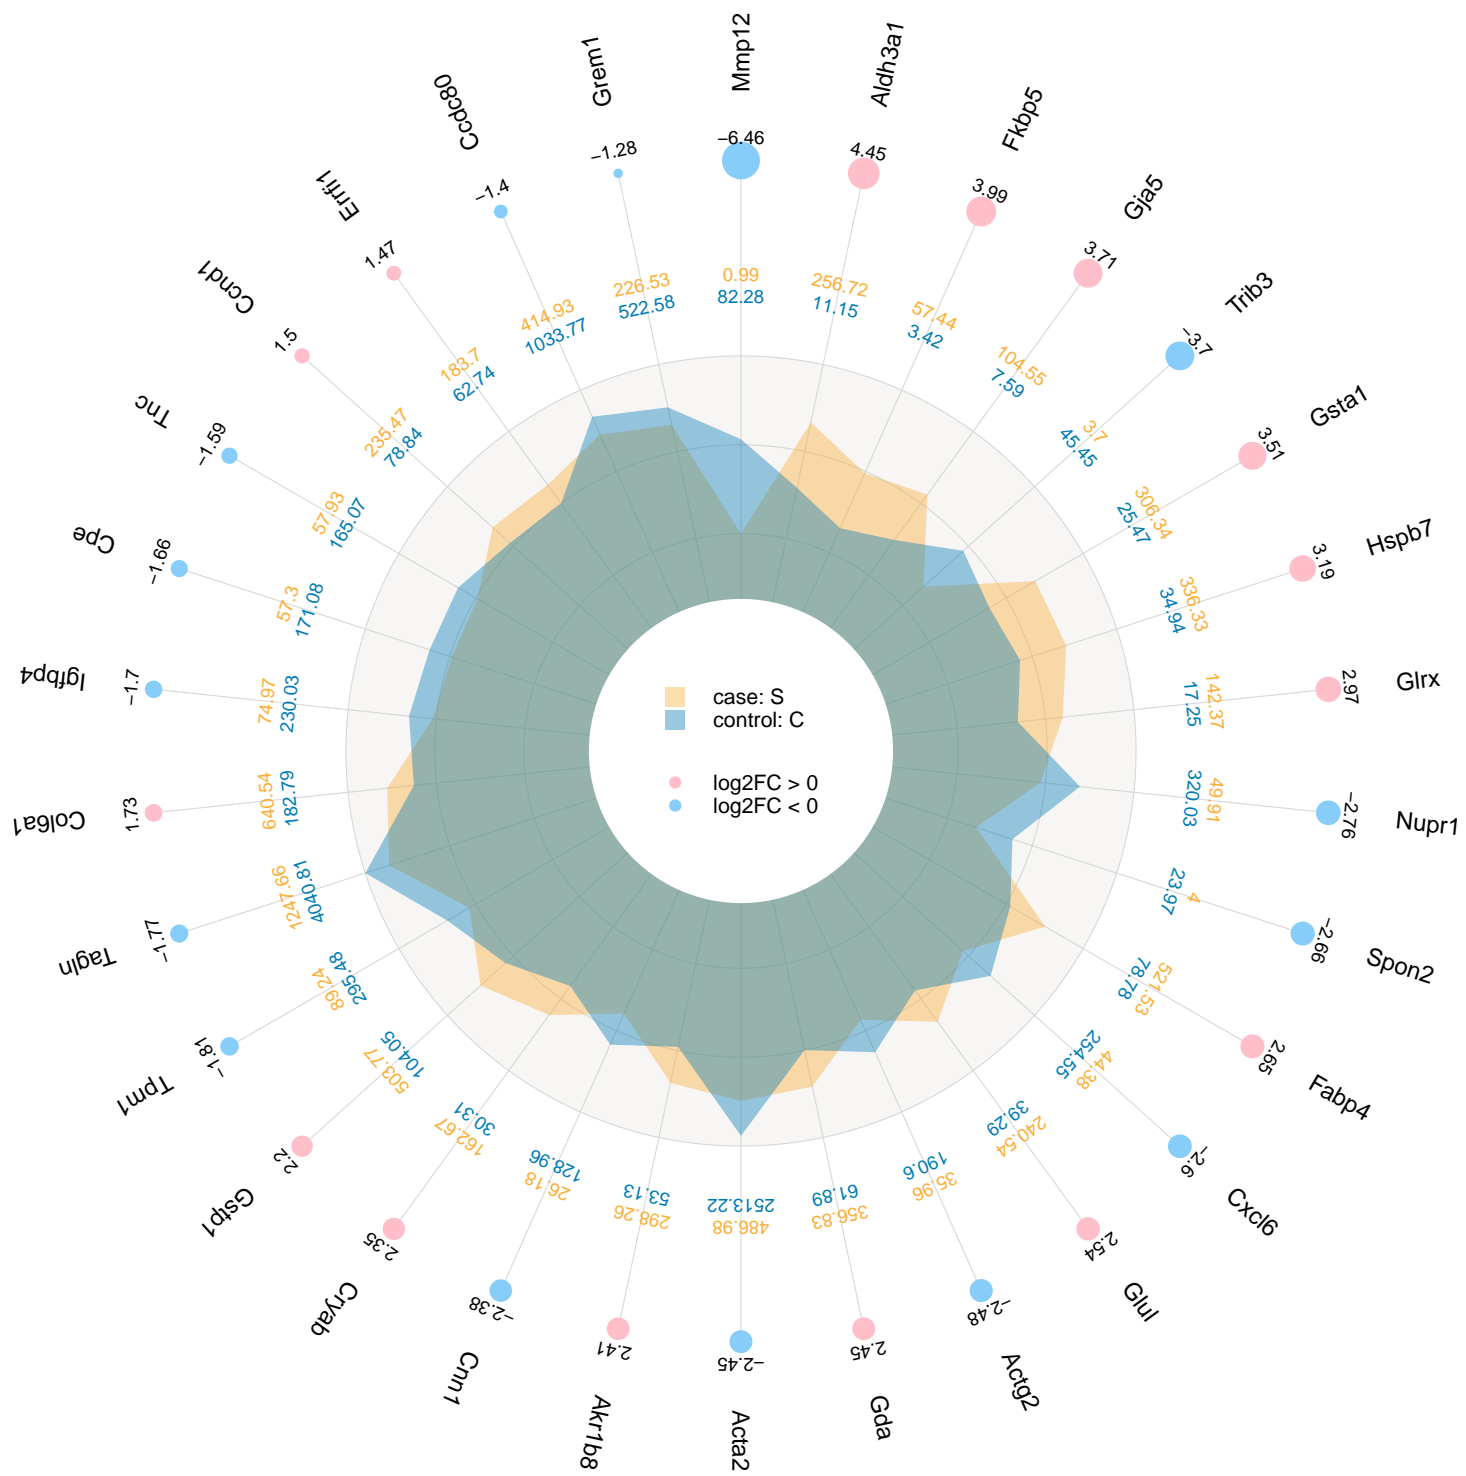

Supplement: Supplementary file 10 [file S-vs-C-radar.pdf › Source data/1.RNA-Seq source data/1.BMSCs/result/1.4.different_expressed_gene/S-vs-C/S-vs-C-radar.pdf]

# S-vs-C: q-value<0.05 && |log<sub>2</sub> FC|>1

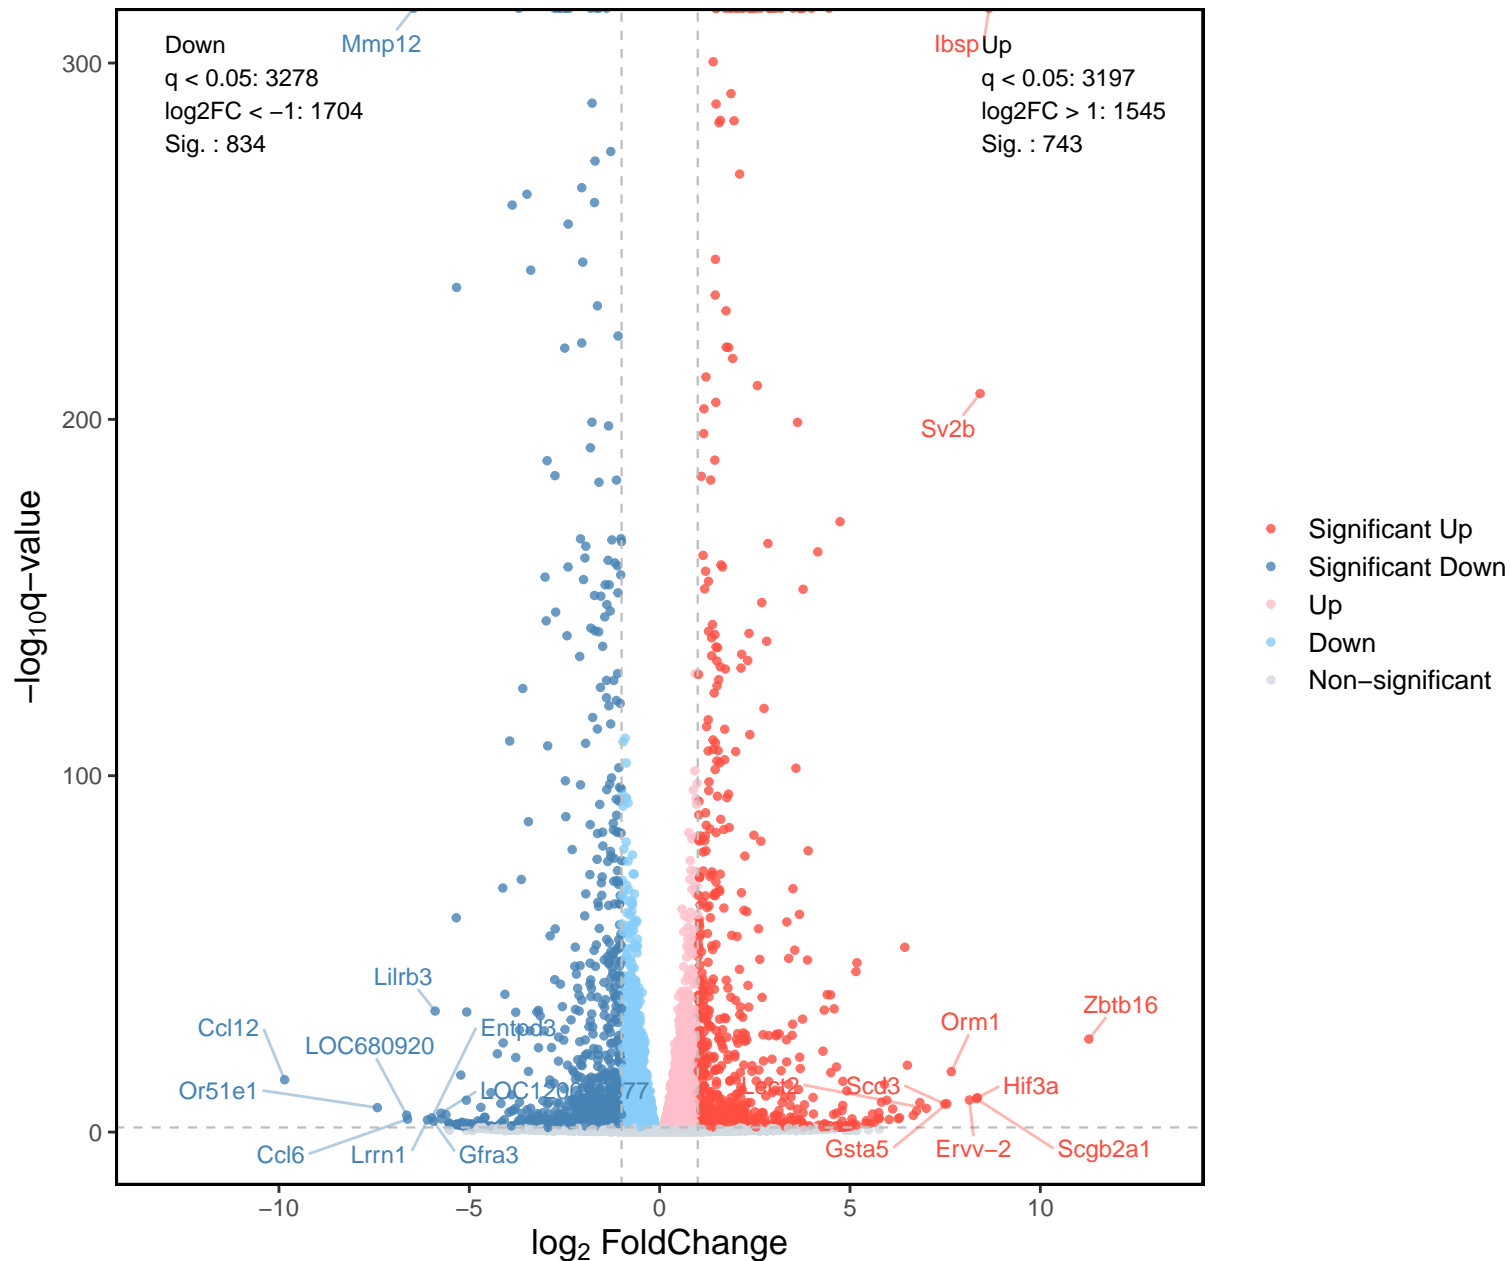

Supplement: Supplementary file 11 [file S-vs-C-volcano-q-val-0.05-FC-2.gene.pdf › Source data/1.RNA-Seq source data/1.BMSCs/result/1.4.different_expressed_gene/S-vs-C/S-vs-C-volcano-q-val-0.05-FC-2.gene.pdf]

Statistic of Differently Expressed gene

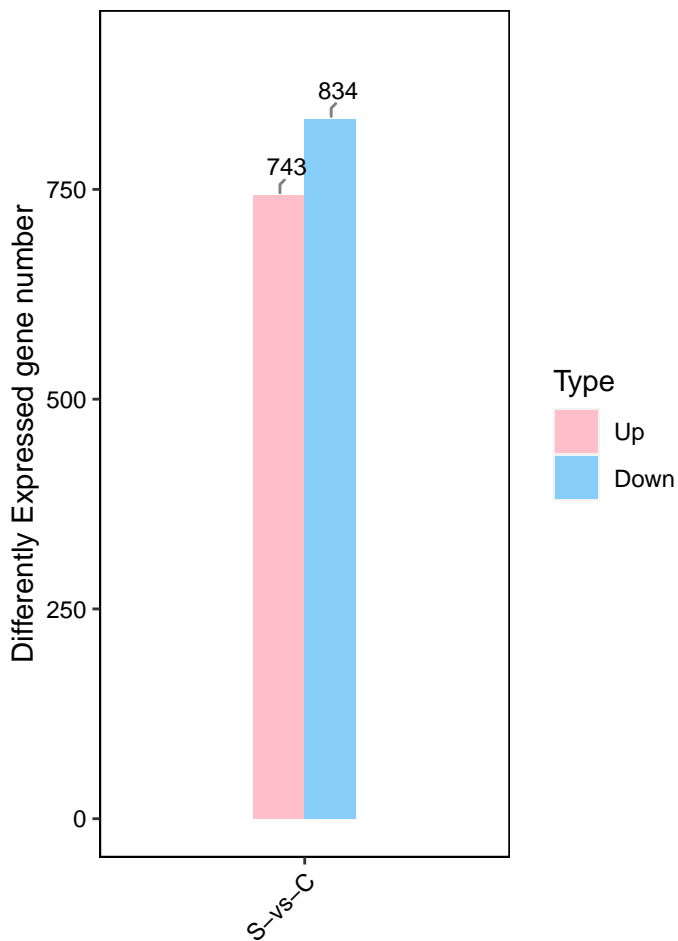

Supplement: Supplementary file 12 [file gene_diff_stat_barplot.pdf › Source data/1.RNA-Seq source data/1.BMSCs/result/1.4.different_expressed_gene/gene_diff_stat_barplot.pdf]

# spindle organization(GO:0007051)

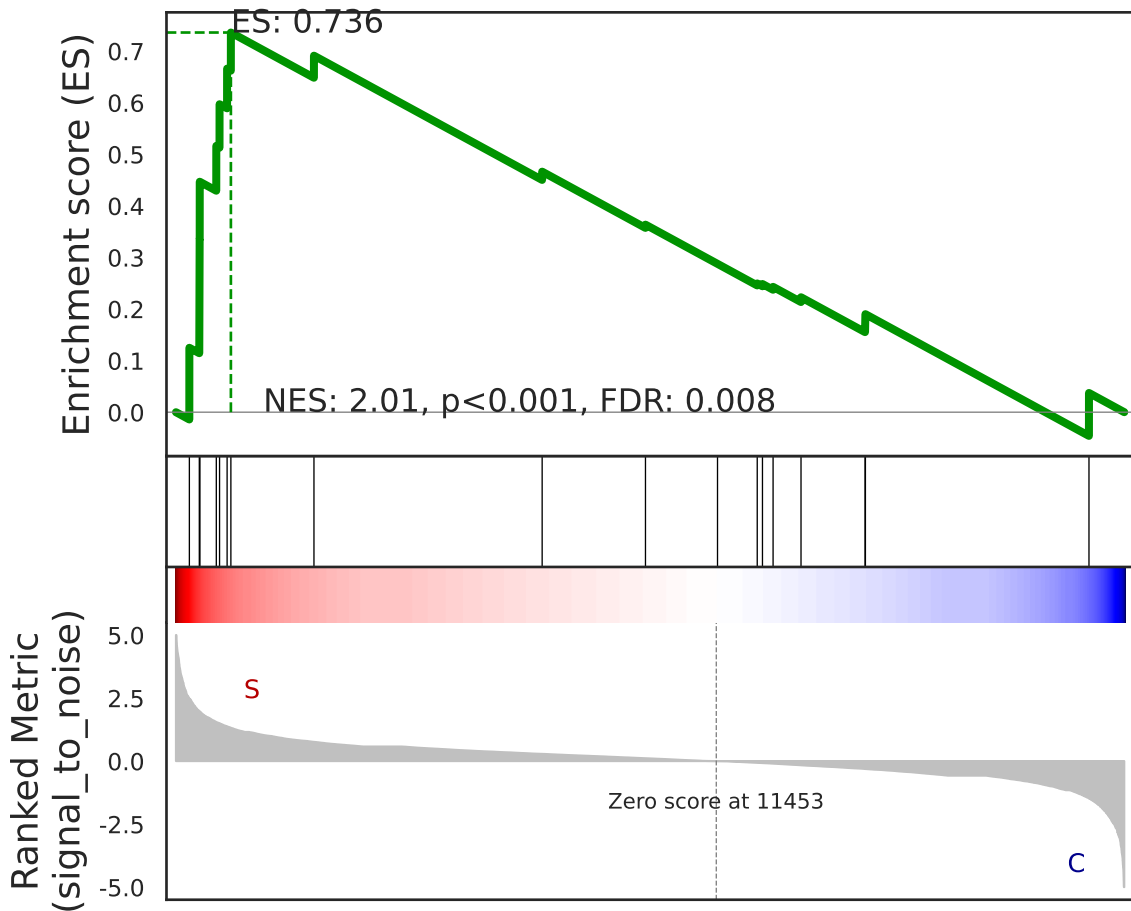

Supplement: Supplementary file 13 [file 10_spindle organization(GO_0007051).gsea.pdf › Source data/1.RNA-Seq source data/1.BMSCs/result/1.6.GSEA/S-vs-C/go/BP/10_spindle organization(GO_0007051).gsea.pdf]

# spindle organization(GO:0007051)

## Heatmap of the Analyzed GeneSet

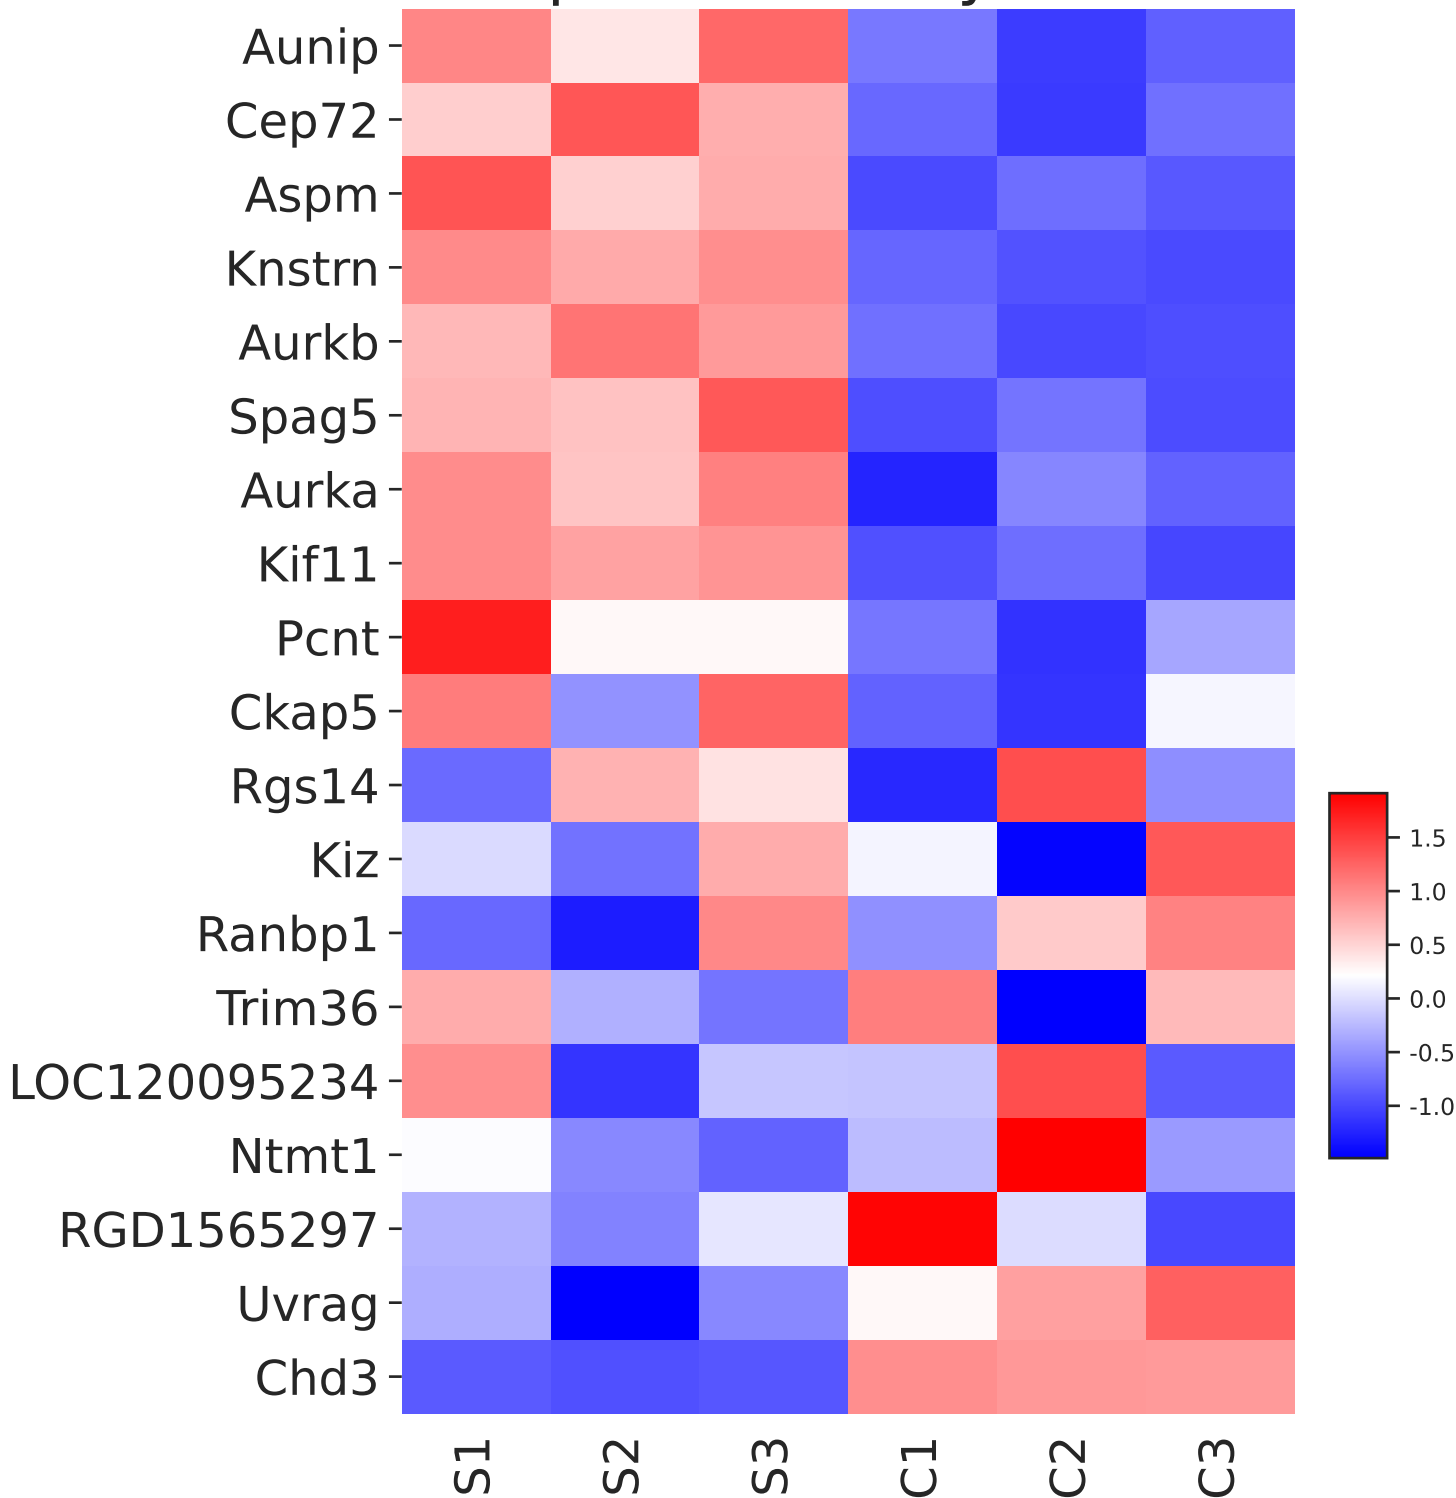

Supplement: Supplementary file 14 [file 10_spindle organization(GO_0007051).heatmap.pdf › Source data/1.RNA-Seq source data/1.BMSCs/result/1.6.GSEA/S-vs-C/go/BP/10_spindle organization(GO_0007051).heatmap.pdf]

calcium-mediated signaling using intracellular calcium so...(GO:0035584)

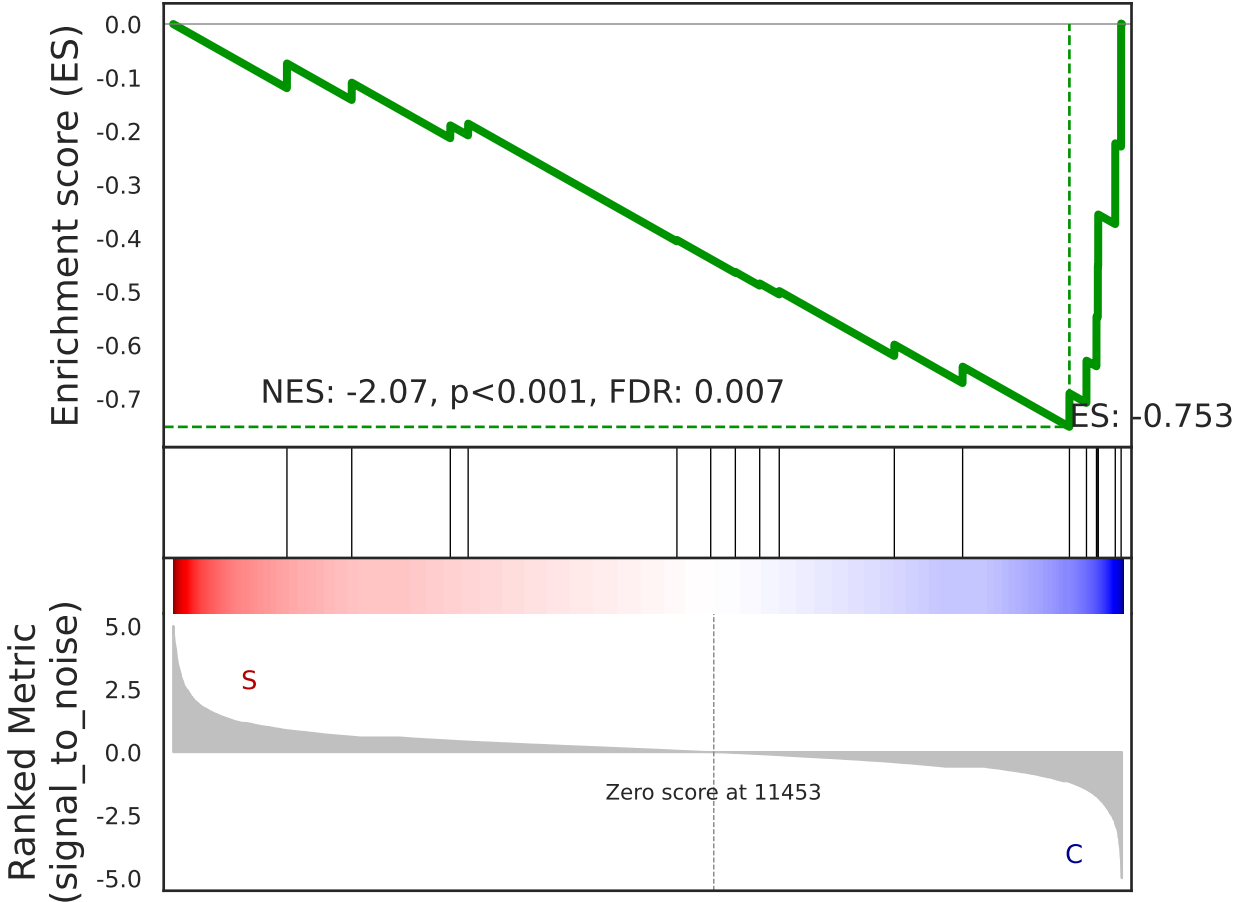

Supplement: Supplementary file 15 [file 1957_calcium-mediated signaling using intracellular calcium so...(GO_0035584).gsea.pdf › Source data/1.RNA-Seq source data/1.BMSCs/result/1.6.GSEA/S-vs-C/go/BP/1957_calcium-mediated signaling using intracellular calcium so...(GO_0035584).gsea.pdf]

# cholesterol biosynthetic process(GO:0006695)

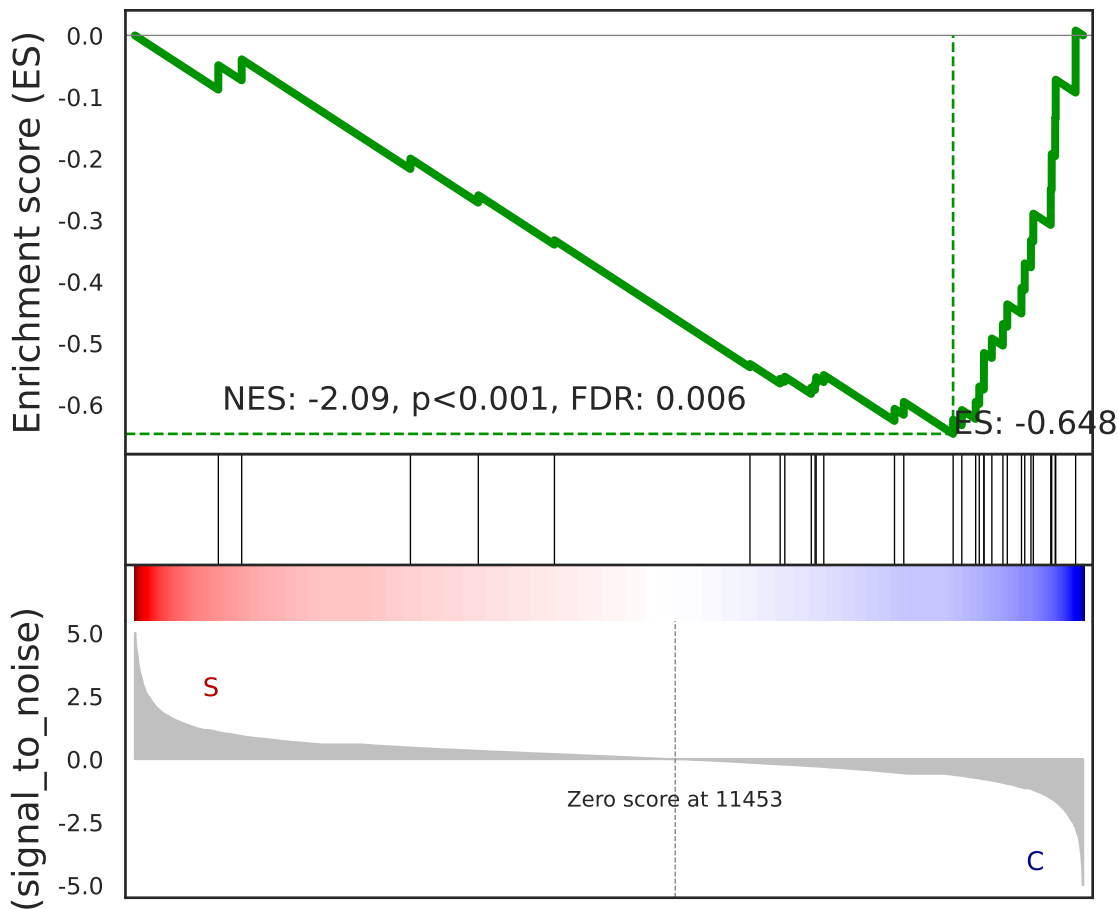

Supplement: Supplementary file 17 [file 1958_cholesterol biosynthetic process(GO_0006695).gsea.pdf › Source data/1.RNA-Seq source data/1.BMSCs/result/1.6.GSEA/S-vs-C/go/BP/1958_cholesterol biosynthetic process(GO_0006695).gsea.pdf]

cholesterol biosynthetic process(GO:0006695)  
Heatmap of the Analyzed GeneSet

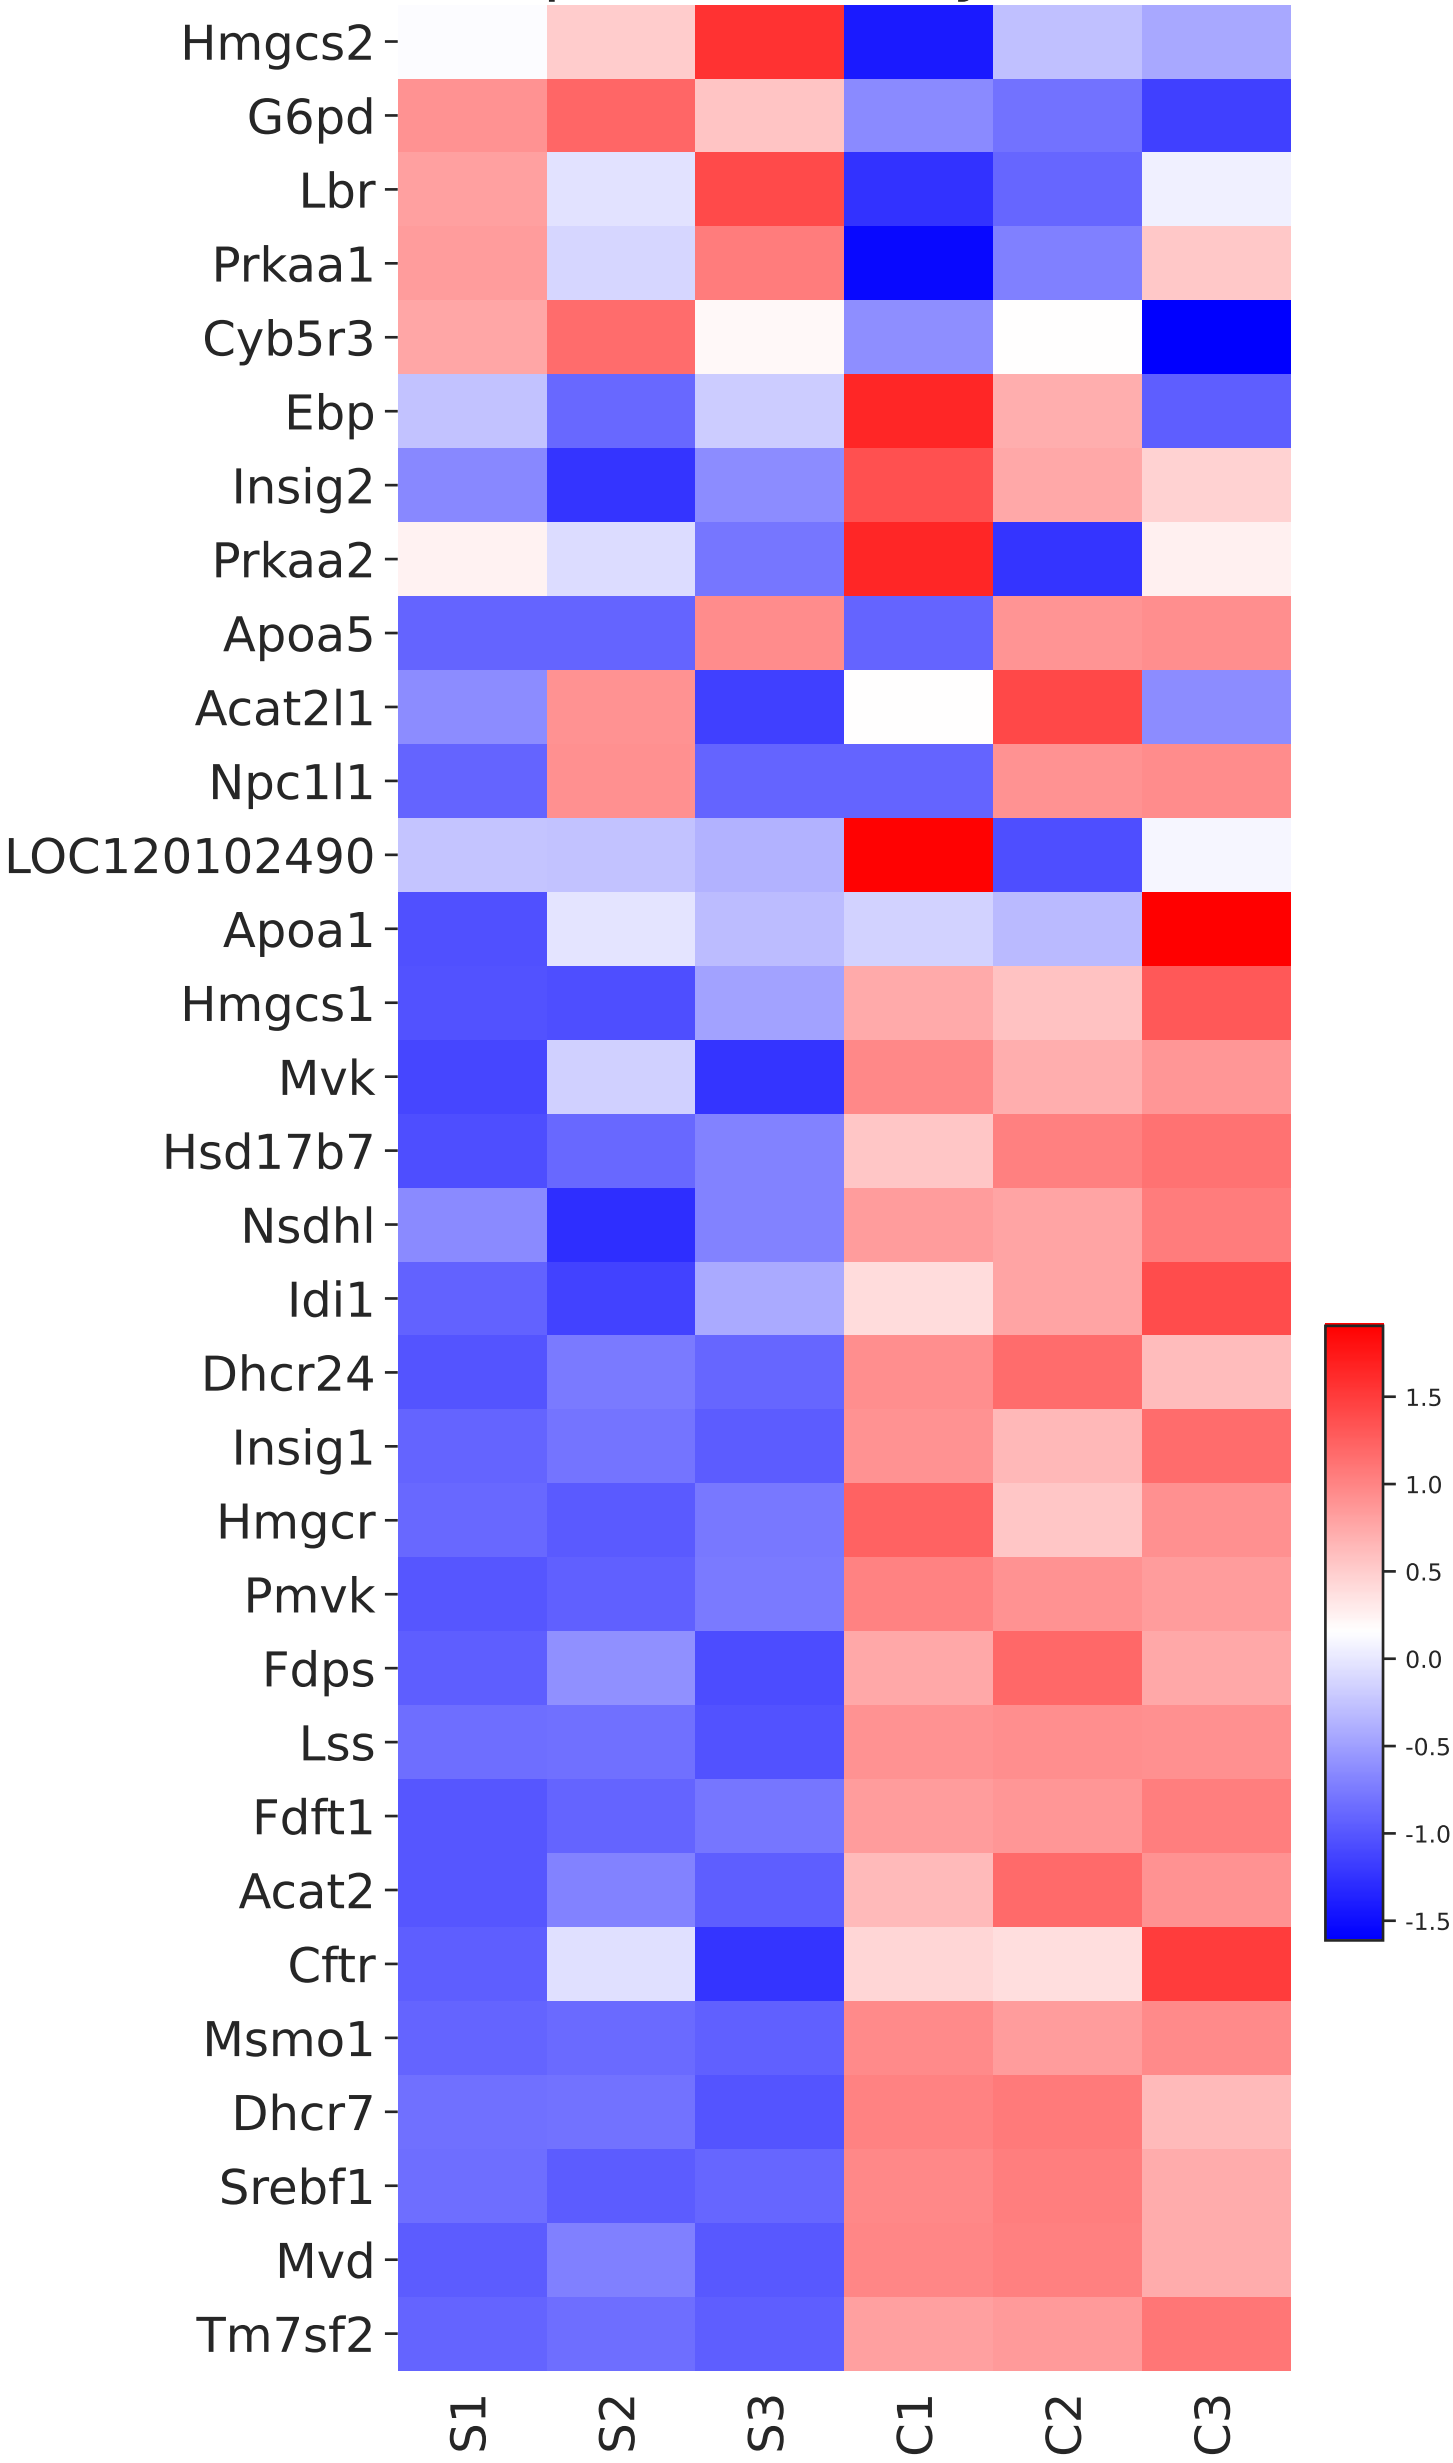

Supplement: Supplementary file 18 [file 1958_cholesterol biosynthetic process(GO_0006695).heatmap.pdf › Source data/1.RNA-Seq source data/1.BMSCs/result/1.6.GSEA/S-vs-C/go/BP/1958_cholesterol biosynthetic process(GO_0006695).heatmap.pdf]

# lymphocyte chemotaxis(GO:0048247)

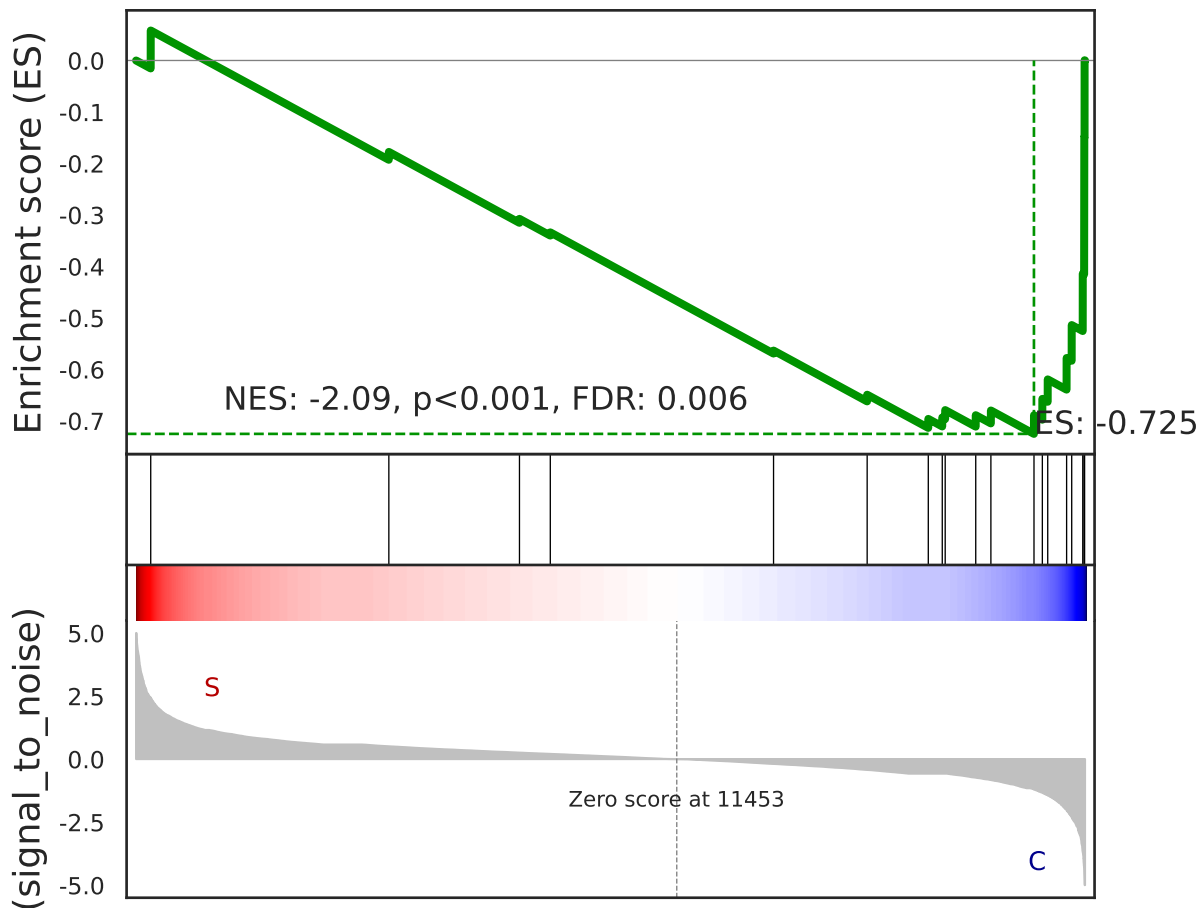

Supplement: Supplementary file 19 [file 1959_lymphocyte chemotaxis(GO_0048247).gsea.pdf › Source data/1.RNA-Seq source data/1.BMSCs/result/1.6.GSEA/S-vs-C/go/BP/1959_lymphocyte chemotaxis(GO_0048247).gsea.pdf]

# lymphocyte chemotaxis(GO:0048247)

## Heatmap of the Analyzed GeneSet

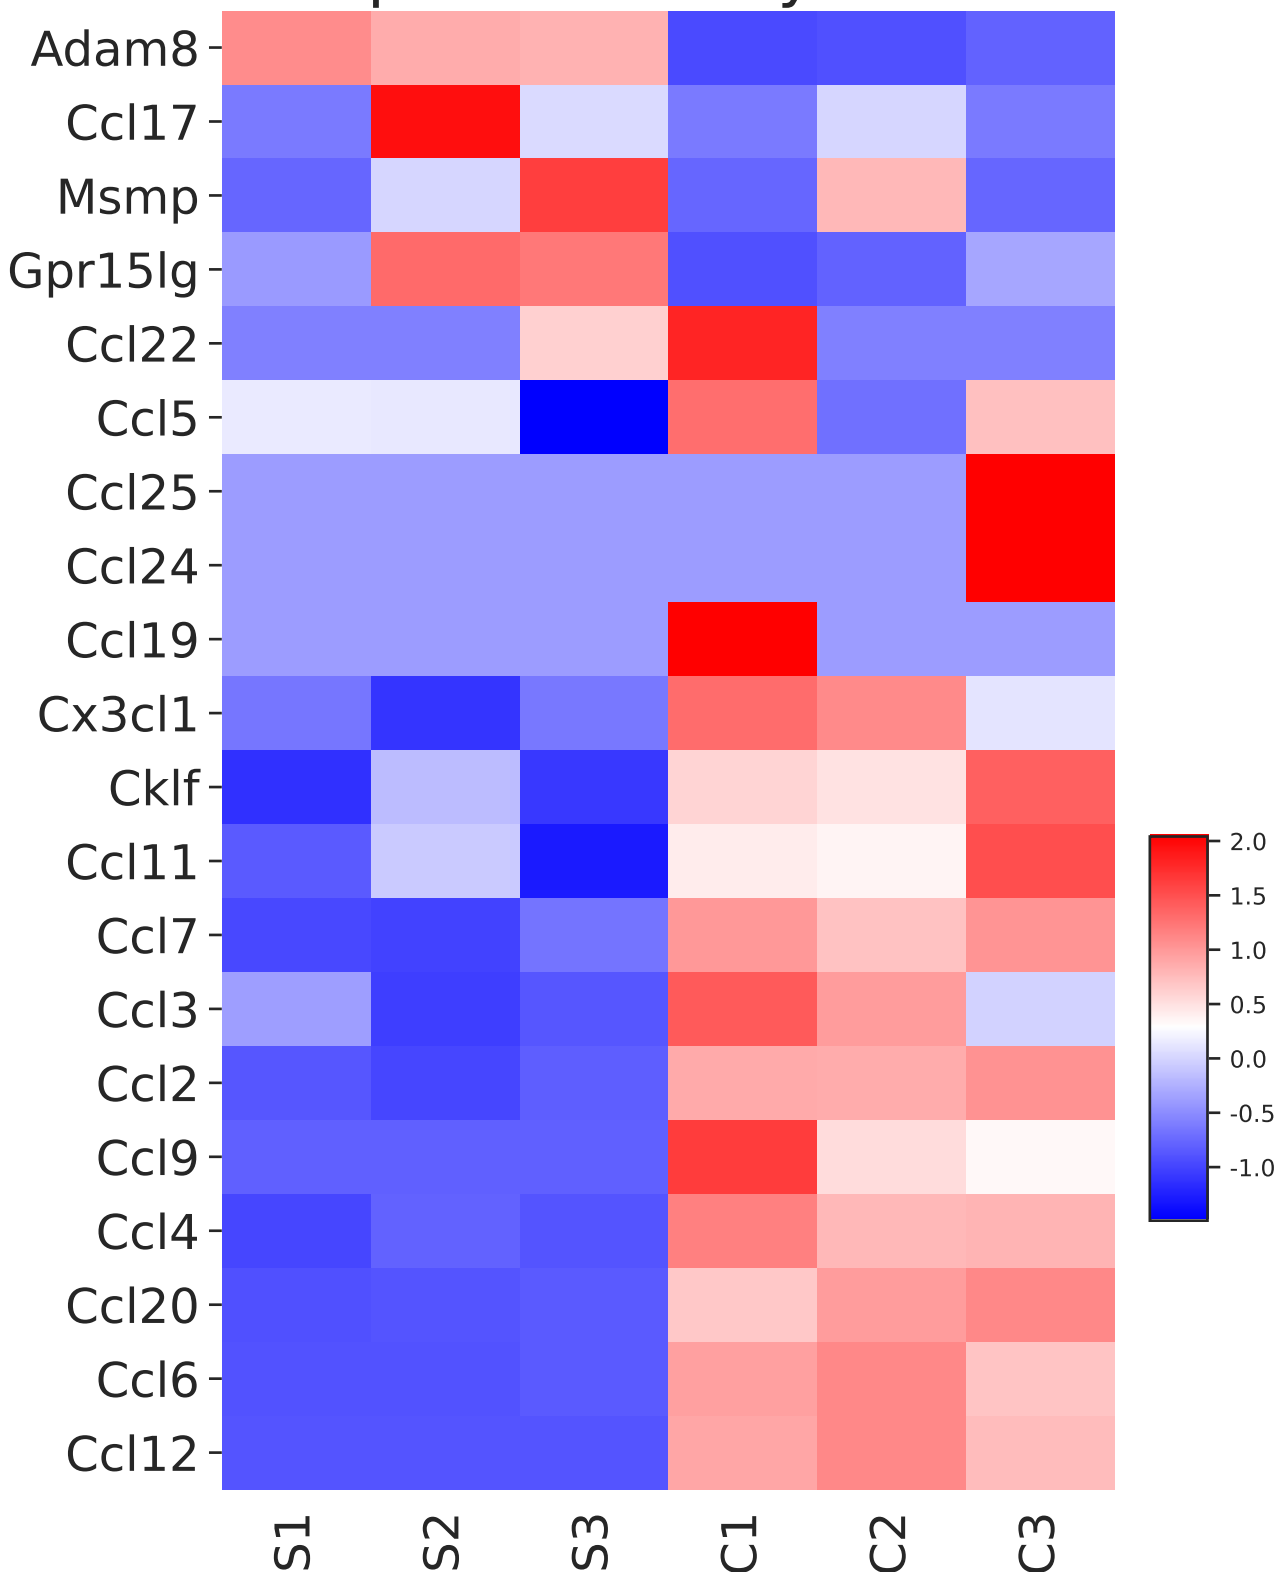

Supplement: Supplementary file 20 [file 1959_lymphocyte chemotaxis(GO_0048247).heatmap.pdf › Source data/1.RNA-Seq source data/1.BMSCs/result/1.6.GSEA/S-vs-C/go/BP/1959_lymphocyte chemotaxis(GO_0048247).heatmap.pdf]

# neuron remodeling(GO:0016322)

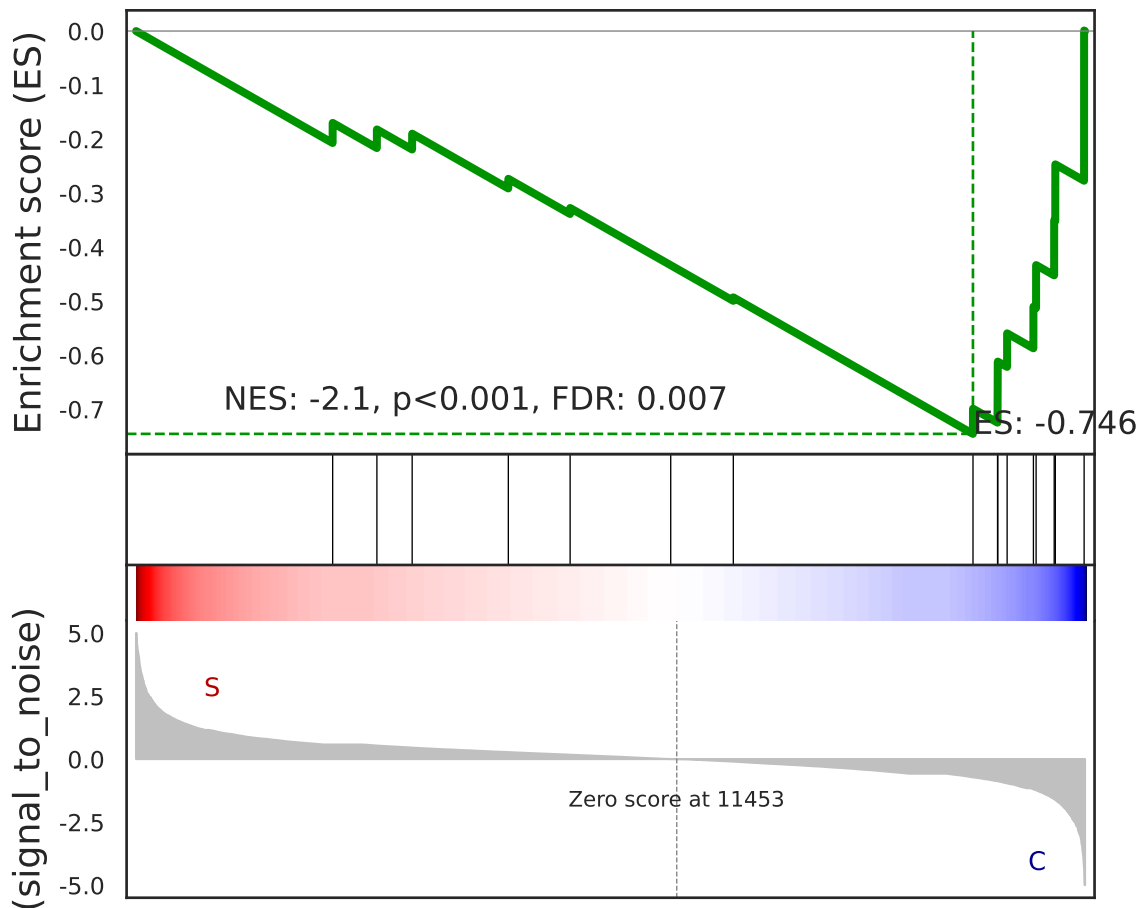

Supplement: Supplementary file 21 [file 1960_neuron remodeling(GO_0016322).gsea.pdf › Source data/1.RNA-Seq source data/1.BMSCs/result/1.6.GSEA/S-vs-C/go/BP/1960_neuron remodeling(GO_0016322).gsea.pdf]

# neuron remodeling(GO:0016322)

## Heatmap of the Analyzed GeneSet

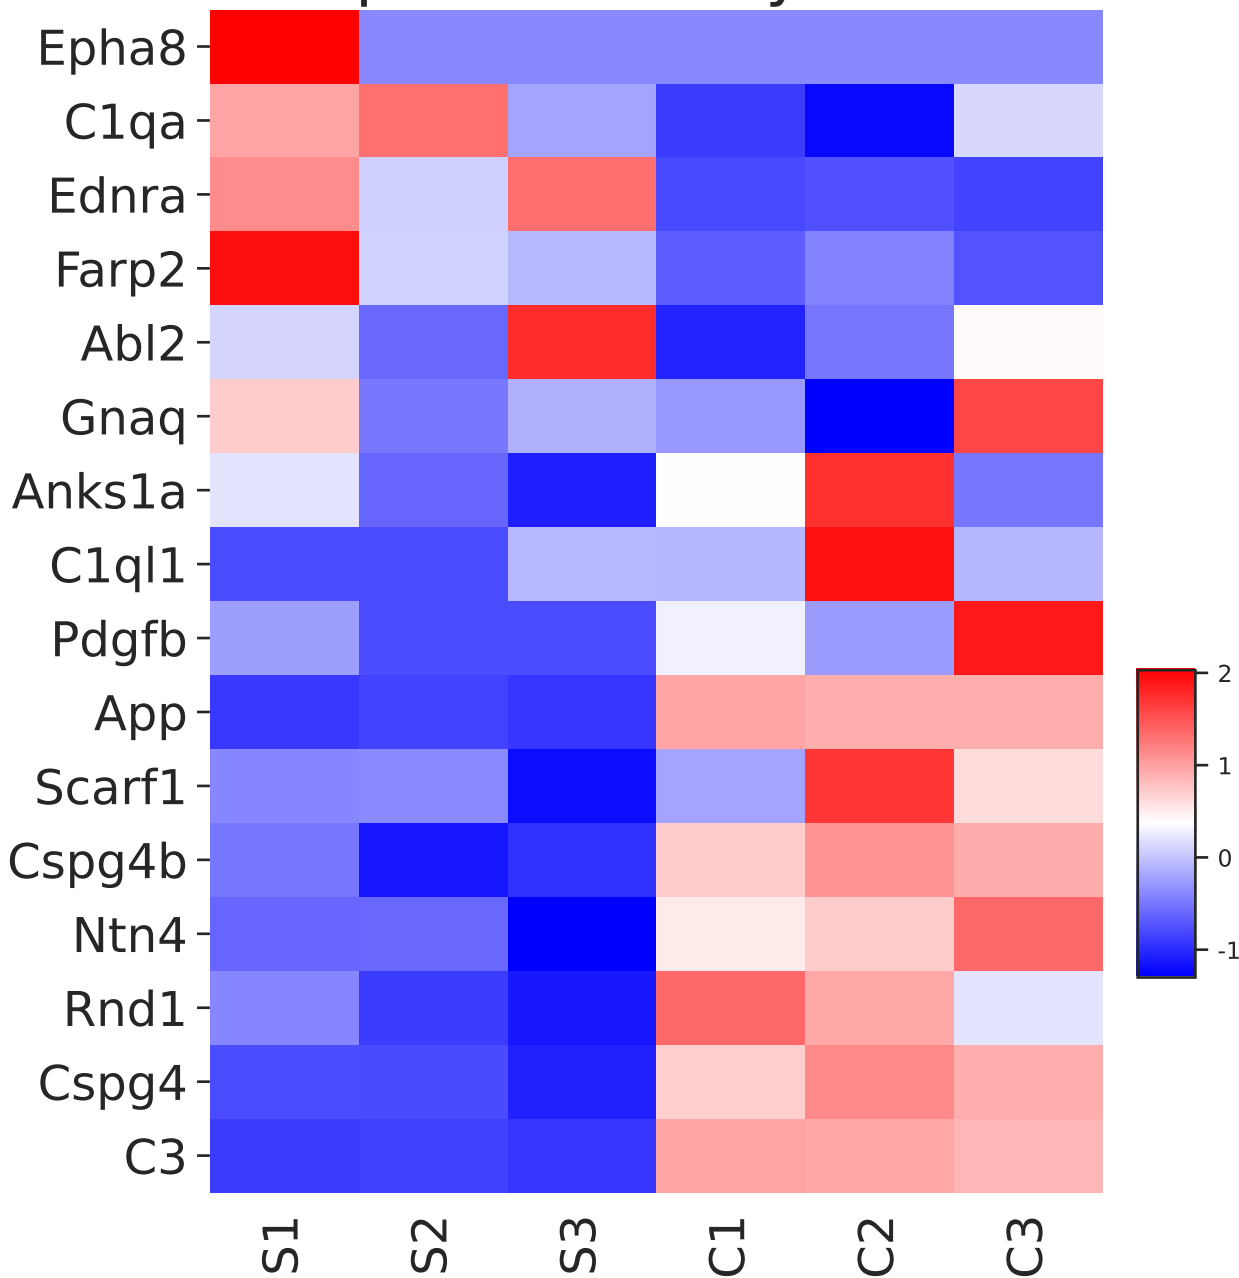

Supplement: Supplementary file 22 [file 1960_neuron remodeling(GO_0016322).heatmap.pdf › Source data/1.RNA-Seq source data/1.BMSCs/result/1.6.GSEA/S-vs-C/go/BP/1960_neuron remodeling(GO_0016322).heatmap.pdf]

# sterol biosynthetic process(GO:0016126)

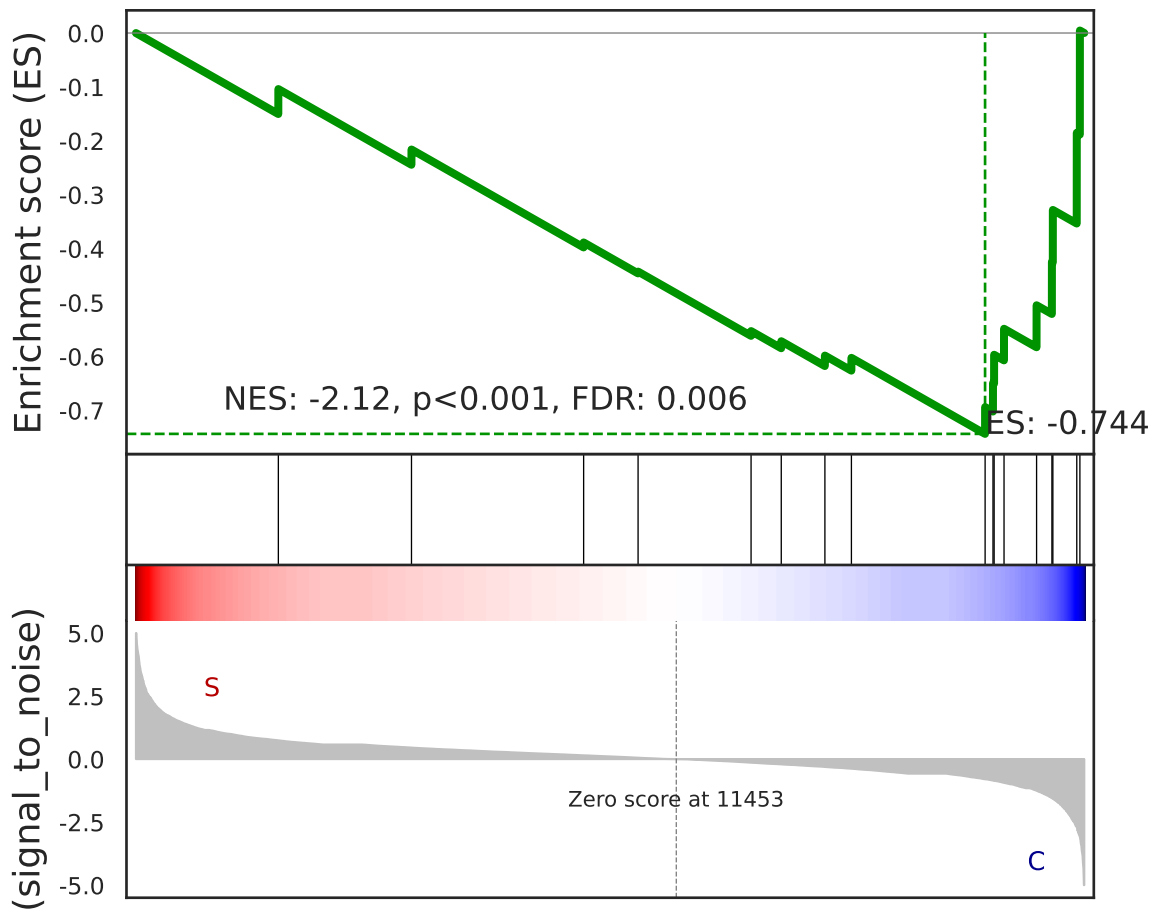

Supplement: Supplementary file 23 [file 1961_sterol biosynthetic process(GO_0016126).gsea.pdf › Source data/1.RNA-Seq source data/1.BMSCs/result/1.6.GSEA/S-vs-C/go/BP/1961_sterol biosynthetic process(GO_0016126).gsea.pdf]

# sterol biosynthetic process(GO:0016126)

## Heatmap of the Analyzed GeneSet

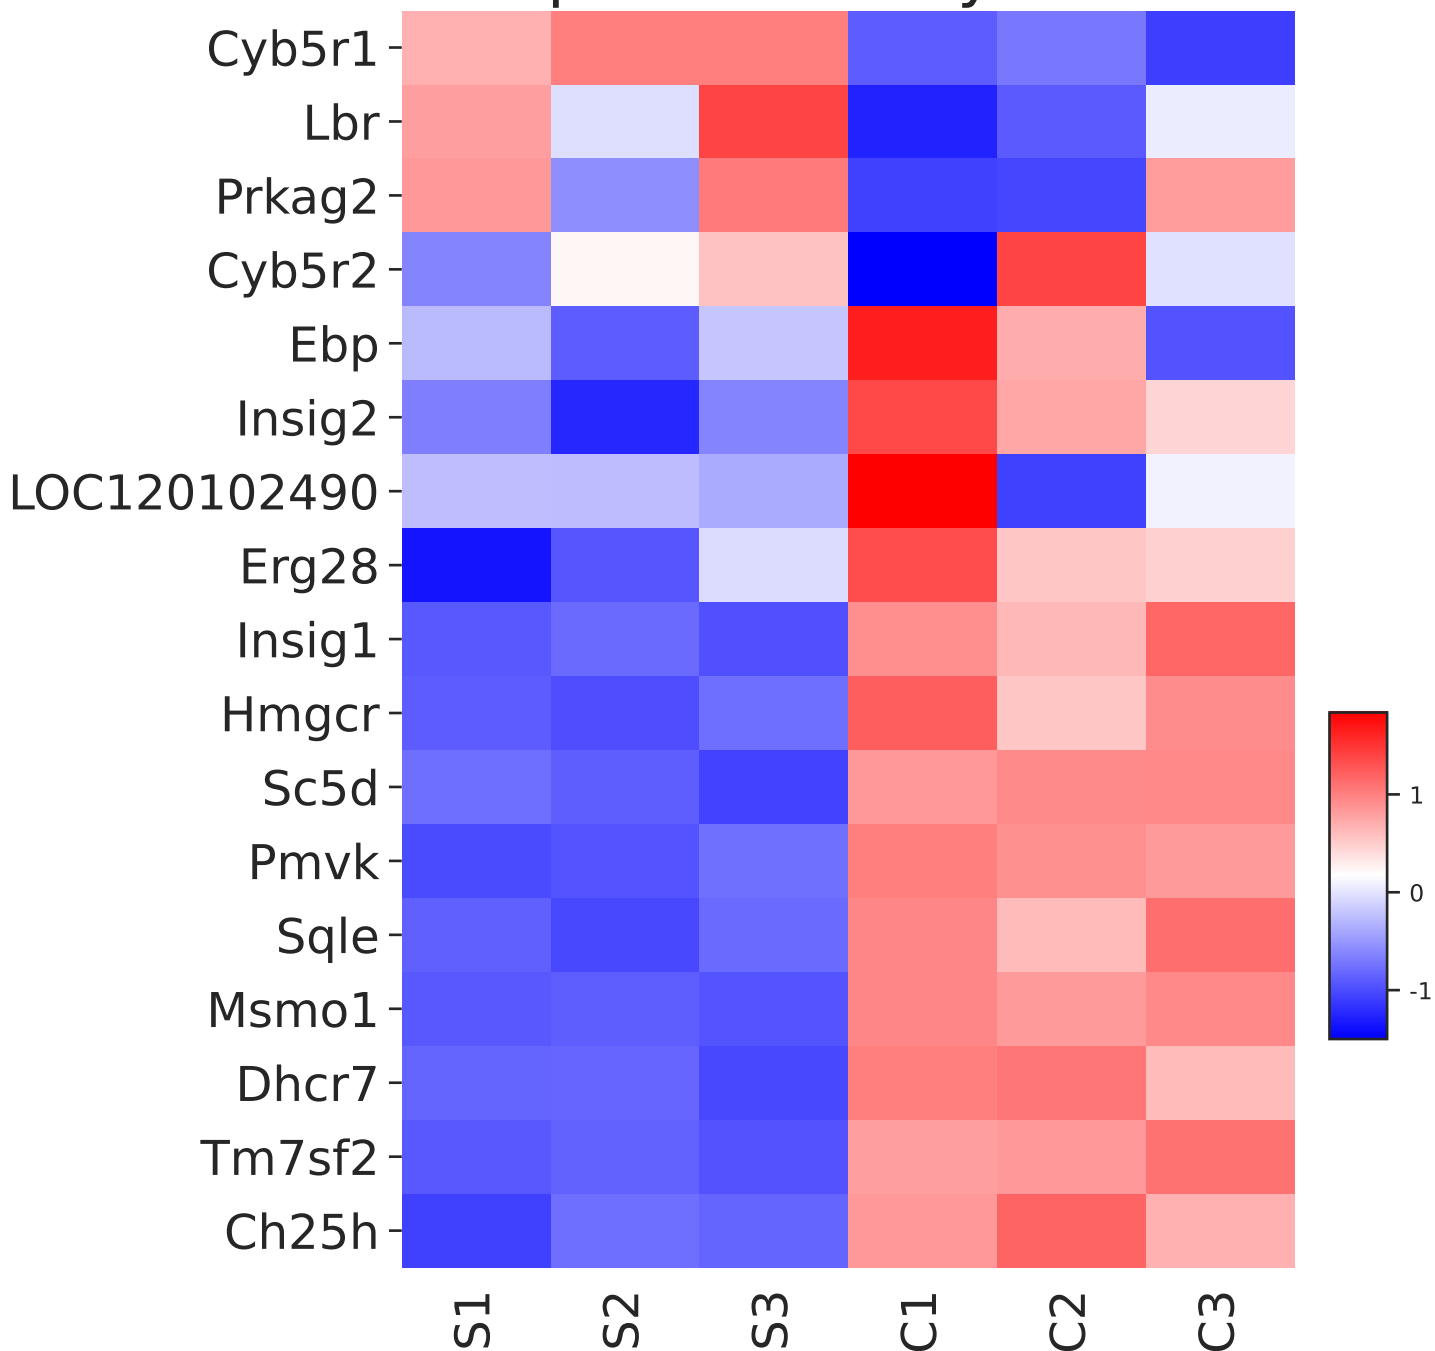

Supplement: Supplementary file 24 [file 1961_sterol biosynthetic process(GO_0016126).heatmap.pdf › Source data/1.RNA-Seq source data/1.BMSCs/result/1.6.GSEA/S-vs-C/go/BP/1961_sterol biosynthetic process(GO_0016126).heatmap.pdf]

# positive regulation of interleukin-10 production(GO:0032733)

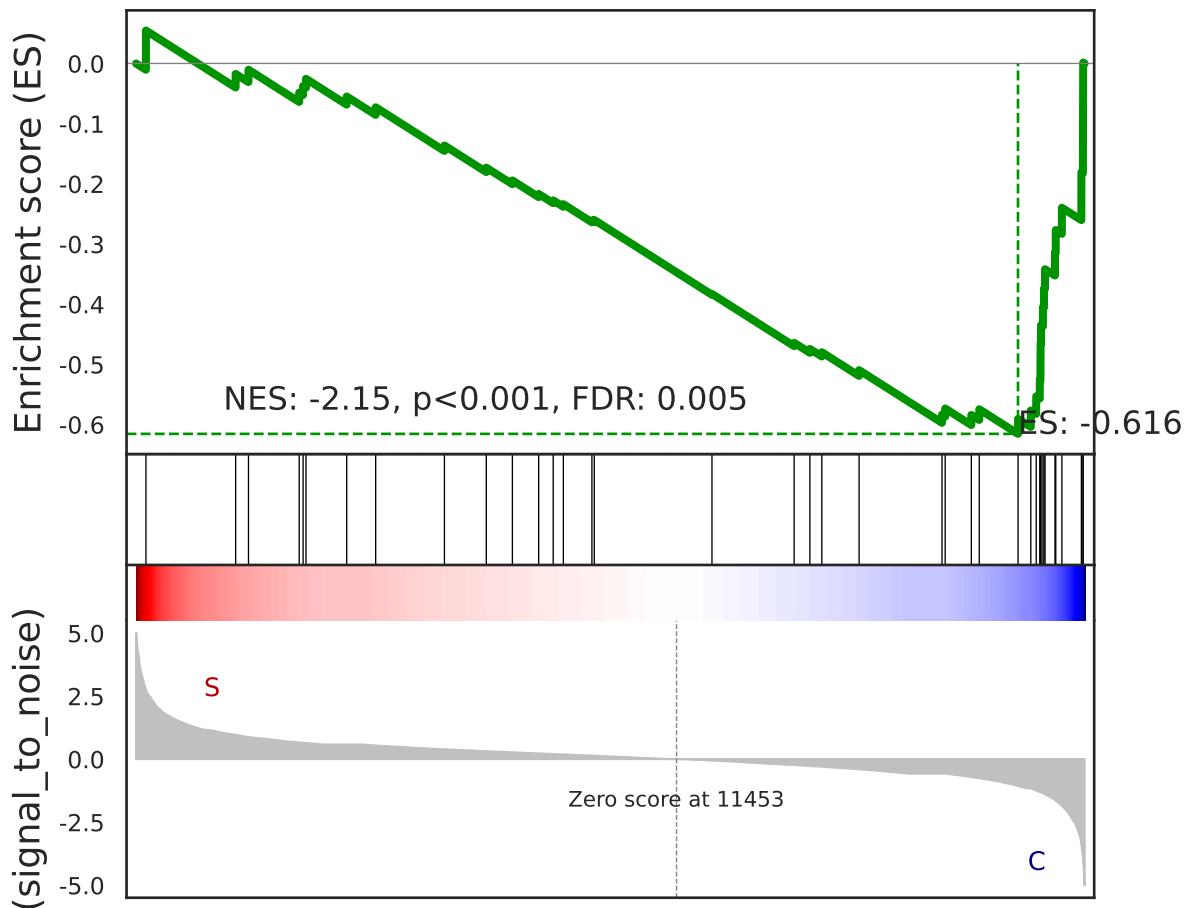

Supplement: Supplementary file 25 [file 1962_positive regulation of interleukin-10 production(GO_0032733).gsea.pdf › Source data/1.RNA-Seq source data/1.BMSCs/result/1.6.GSEA/S-vs-C/go/BP/1962_positive regulation of interleukin-10 production(GO_0032733).gsea.pdf]

positive regulation of interleukin-10 production(GO:0032733)

Heatmap of the Analyzed GeneSet

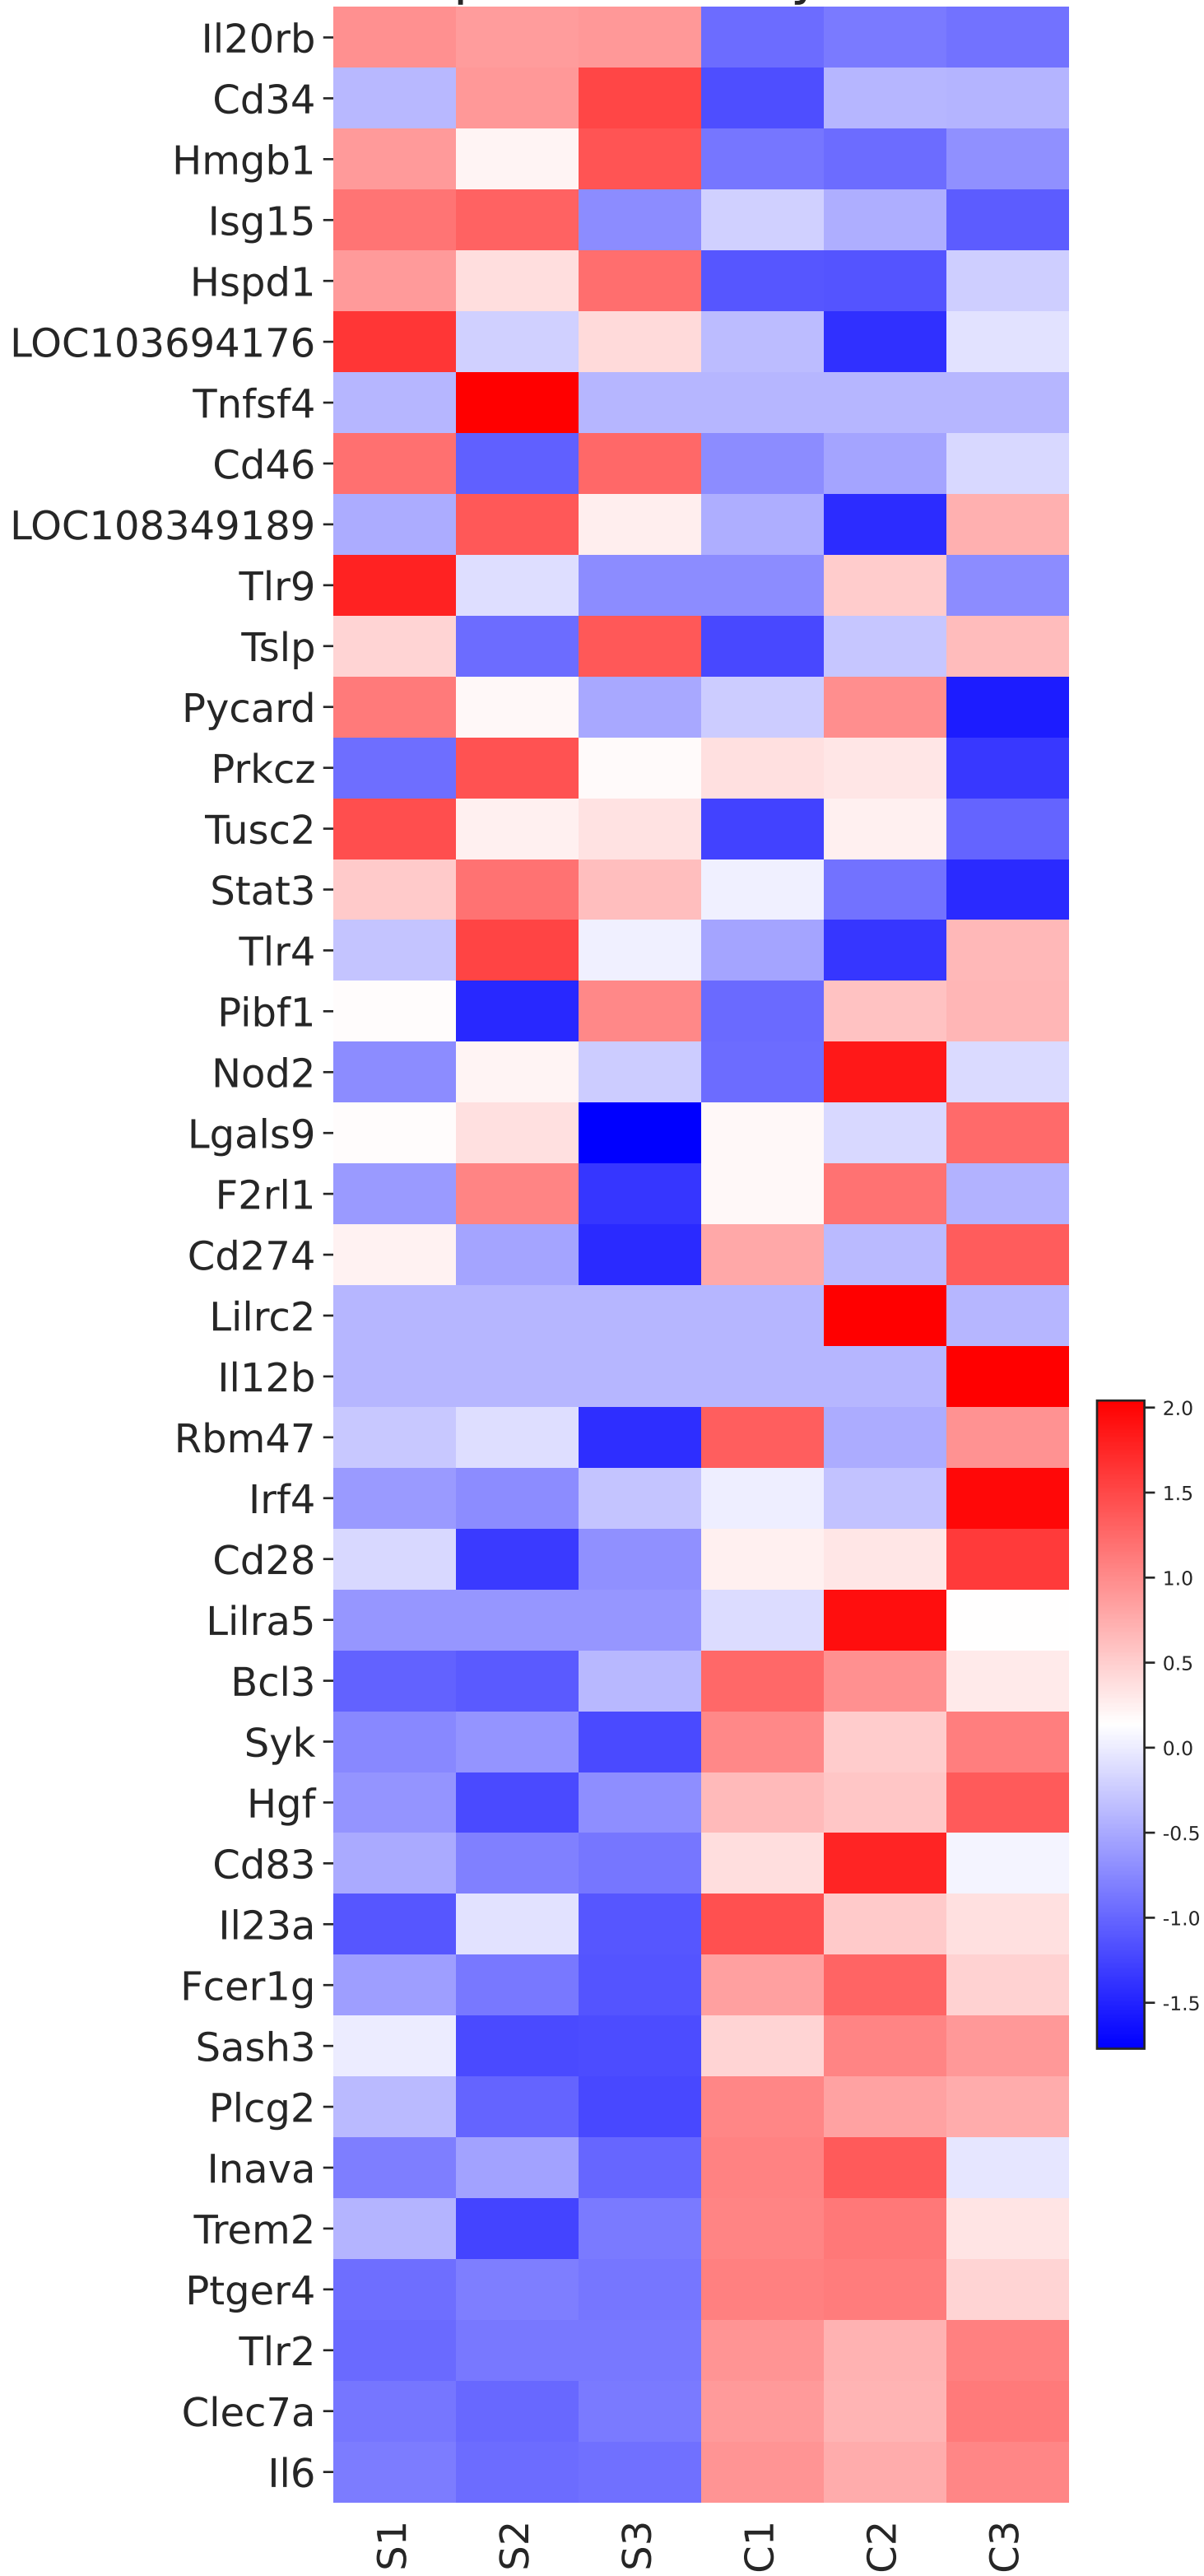

Supplement: Supplementary file 26 [file 1962_positive regulation of interleukin-10 production(GO_0032733).heatmap.pdf › Source data/1.RNA-Seq source data/1.BMSCs/result/1.6.GSEA/S-vs-C/go/BP/1962_positive regulation of interleukin-10 production(GO_0032733).heatmap.pdf]

# phagocytosis, engulfment(GO:0006911)

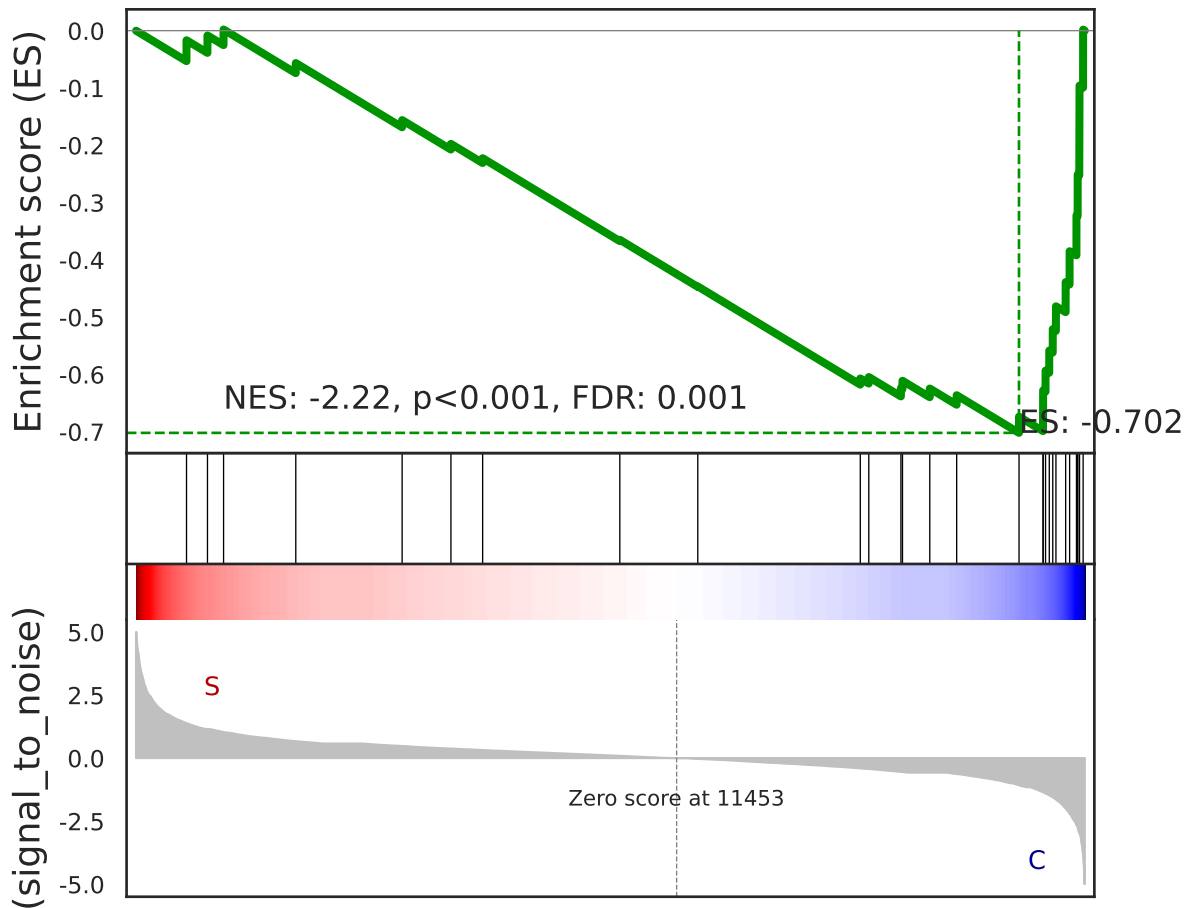

Supplement: Supplementary file 27 [file 1963_phagocytosis, engulfment(GO_0006911).gsea.pdf › Source data/1.RNA-Seq source data/1.BMSCs/result/1.6.GSEA/S-vs-C/go/BP/1963_phagocytosis, engulfment(GO_0006911).gsea.pdf]

phagocytosis, engulfment(GO:0006911)  
Heatmap of the Analyzed GeneSet

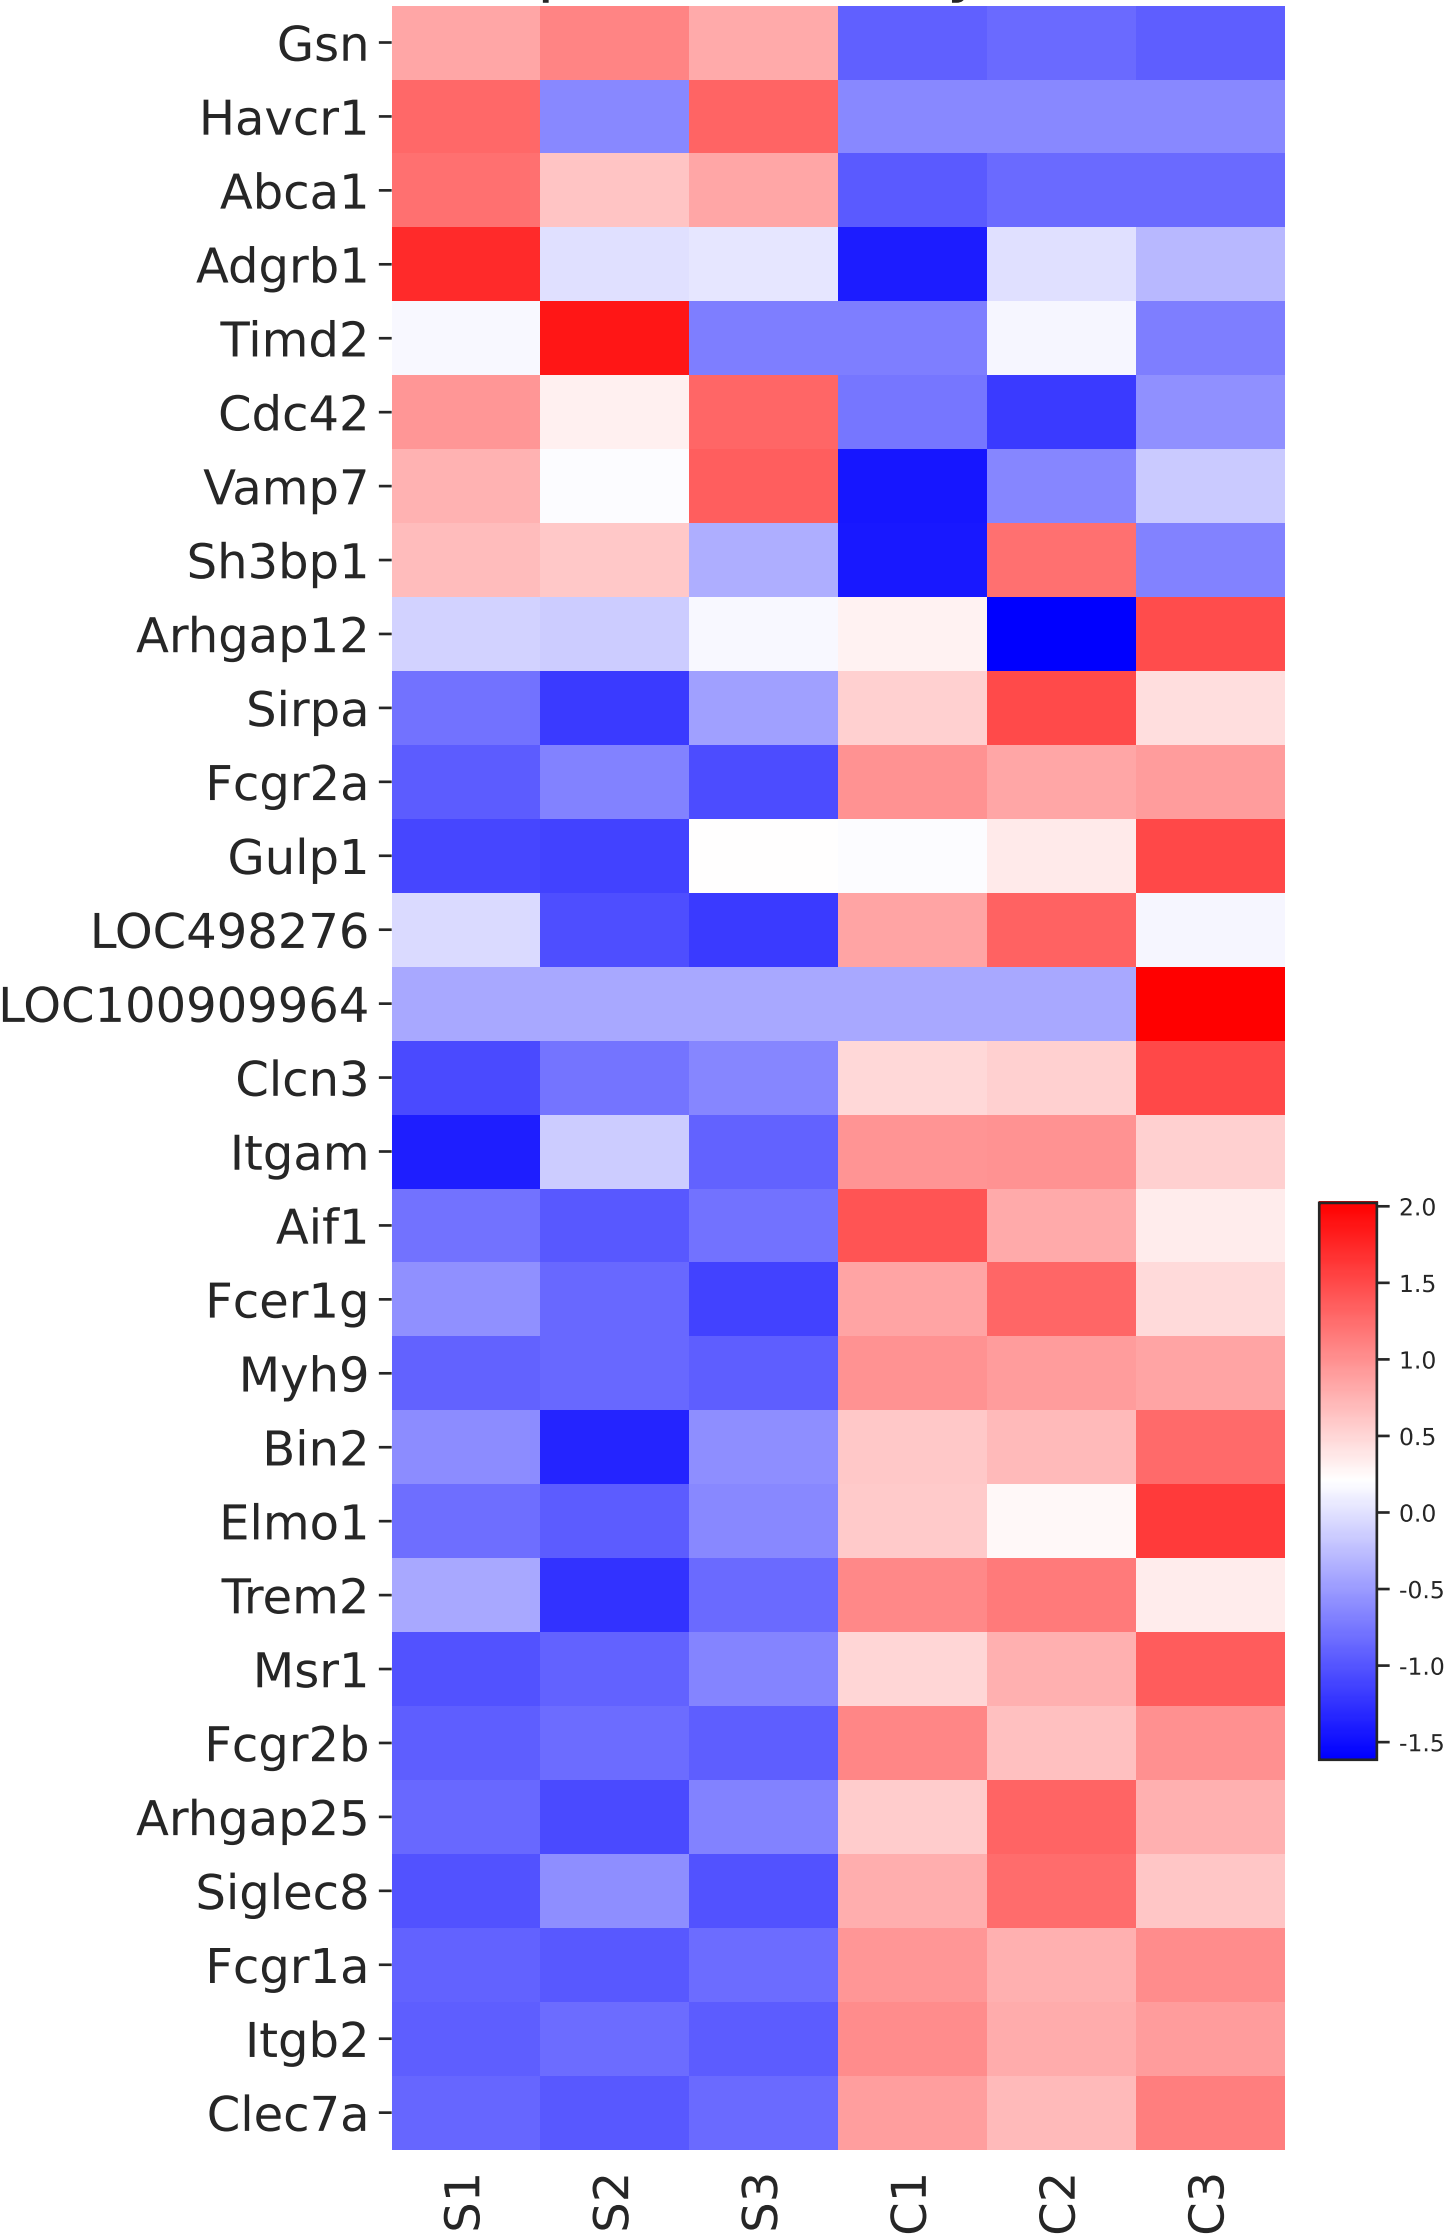

Supplement: Supplementary file 28 [file 1963_phagocytosis, engulfment(GO_0006911).heatmap.pdf › Source data/1.RNA-Seq source data/1.BMSCs/result/1.6.GSEA/S-vs-C/go/BP/1963_phagocytosis, engulfment(GO_0006911).heatmap.pdf]

# monocyte chemotaxis(GO:0002548)

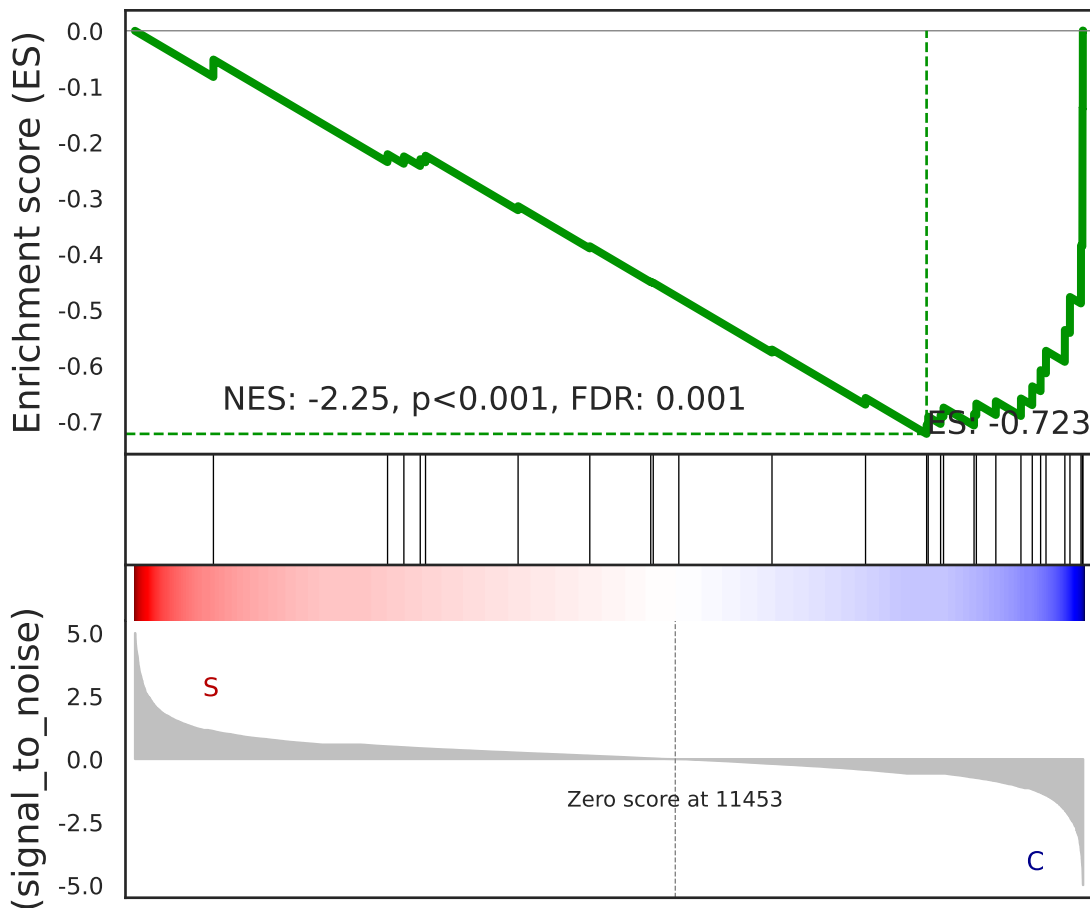

Supplement: Supplementary file 29 [file 1964_monocyte chemotaxis(GO_0002548).gsea.pdf › Source data/1.RNA-Seq source data/1.BMSCs/result/1.6.GSEA/S-vs-C/go/BP/1964_monocyte chemotaxis(GO_0002548).gsea.pdf]

monocyte chemotaxis(GO:0002548)  
Heatmap of the Analyzed GeneSet

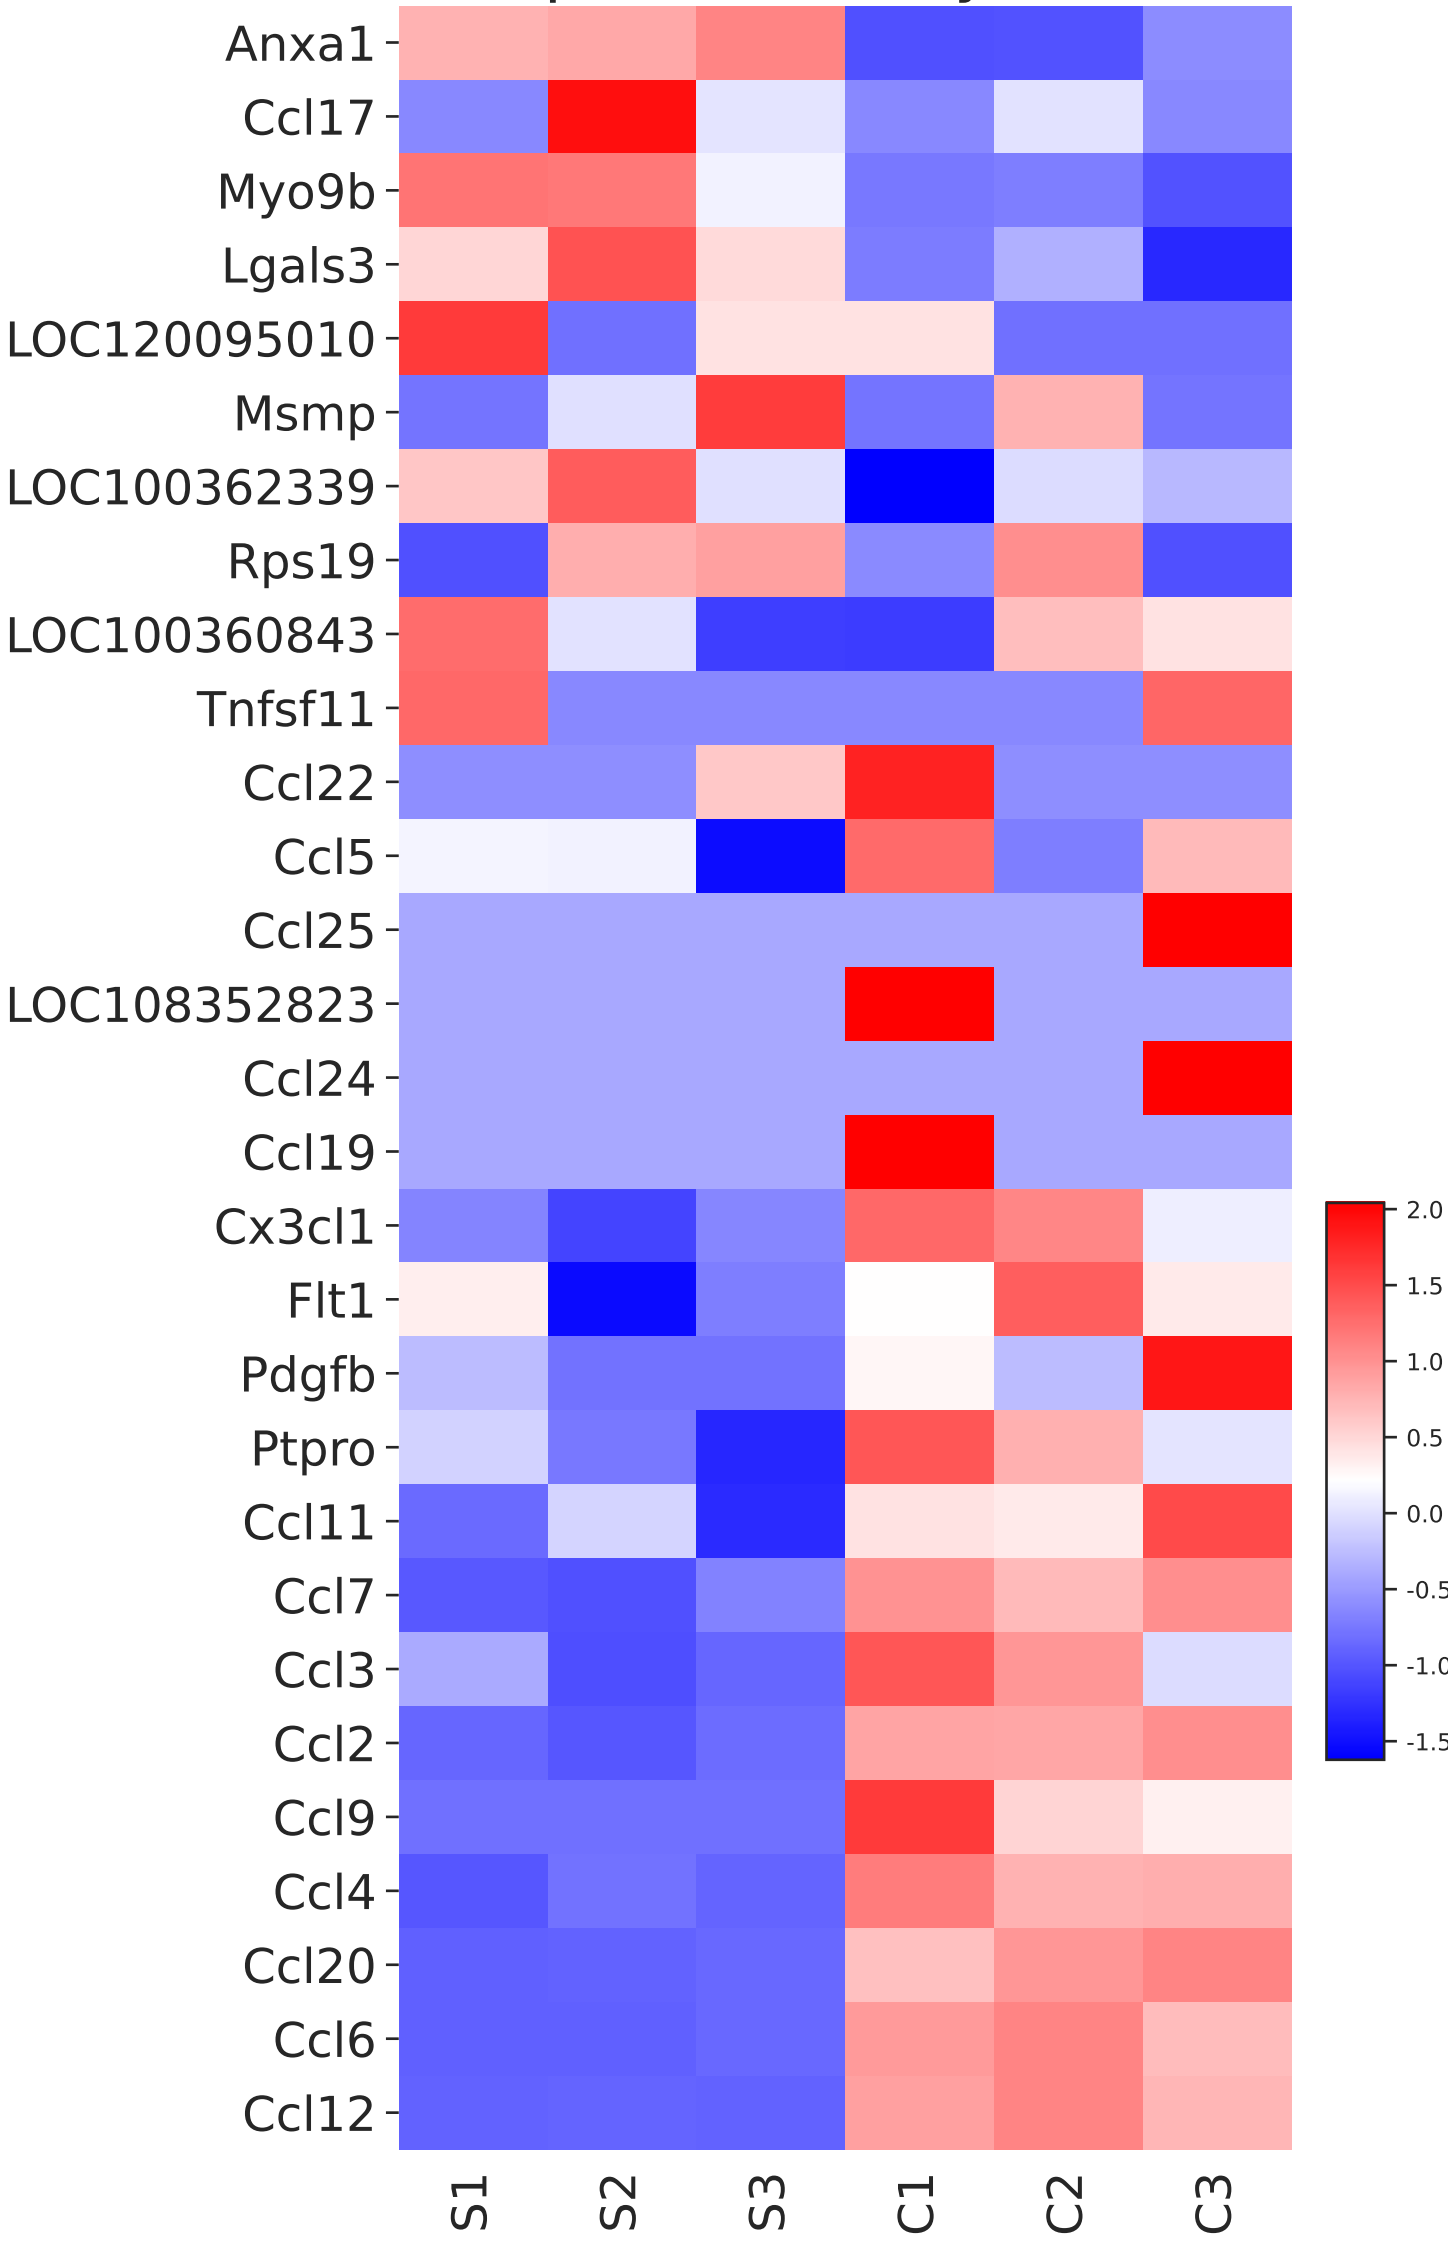

Supplement: Supplementary file 30 [file 1964_monocyte chemotaxis(GO_0002548).heatmap.pdf › Source data/1.RNA-Seq source data/1.BMSCs/result/1.6.GSEA/S-vs-C/go/BP/1964_monocyte chemotaxis(GO_0002548).heatmap.pdf]

# chemokine-mediated signaling pathway(GO:0070098)

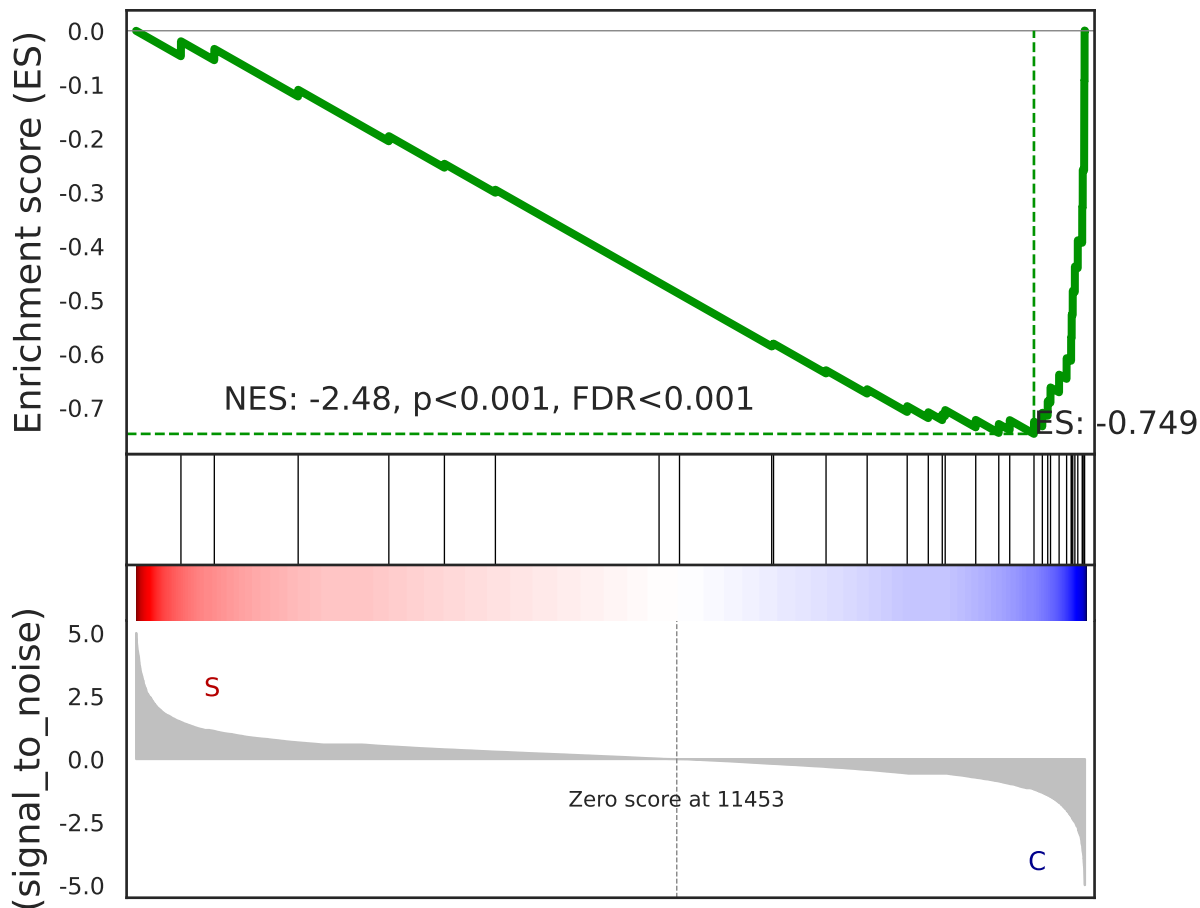

Supplement: Supplementary file 31 [file 1965_chemokine-mediated signaling pathway(GO_0070098).gsea.pdf › Source data/1.RNA-Seq source data/1.BMSCs/result/1.6.GSEA/S-vs-C/go/BP/1965_chemokine-mediated signaling pathway(GO_0070098).gsea.pdf]

chemokine-mediated signaling pathway(GO:0070098)  
Heatmap of the Analyzed GeneSet

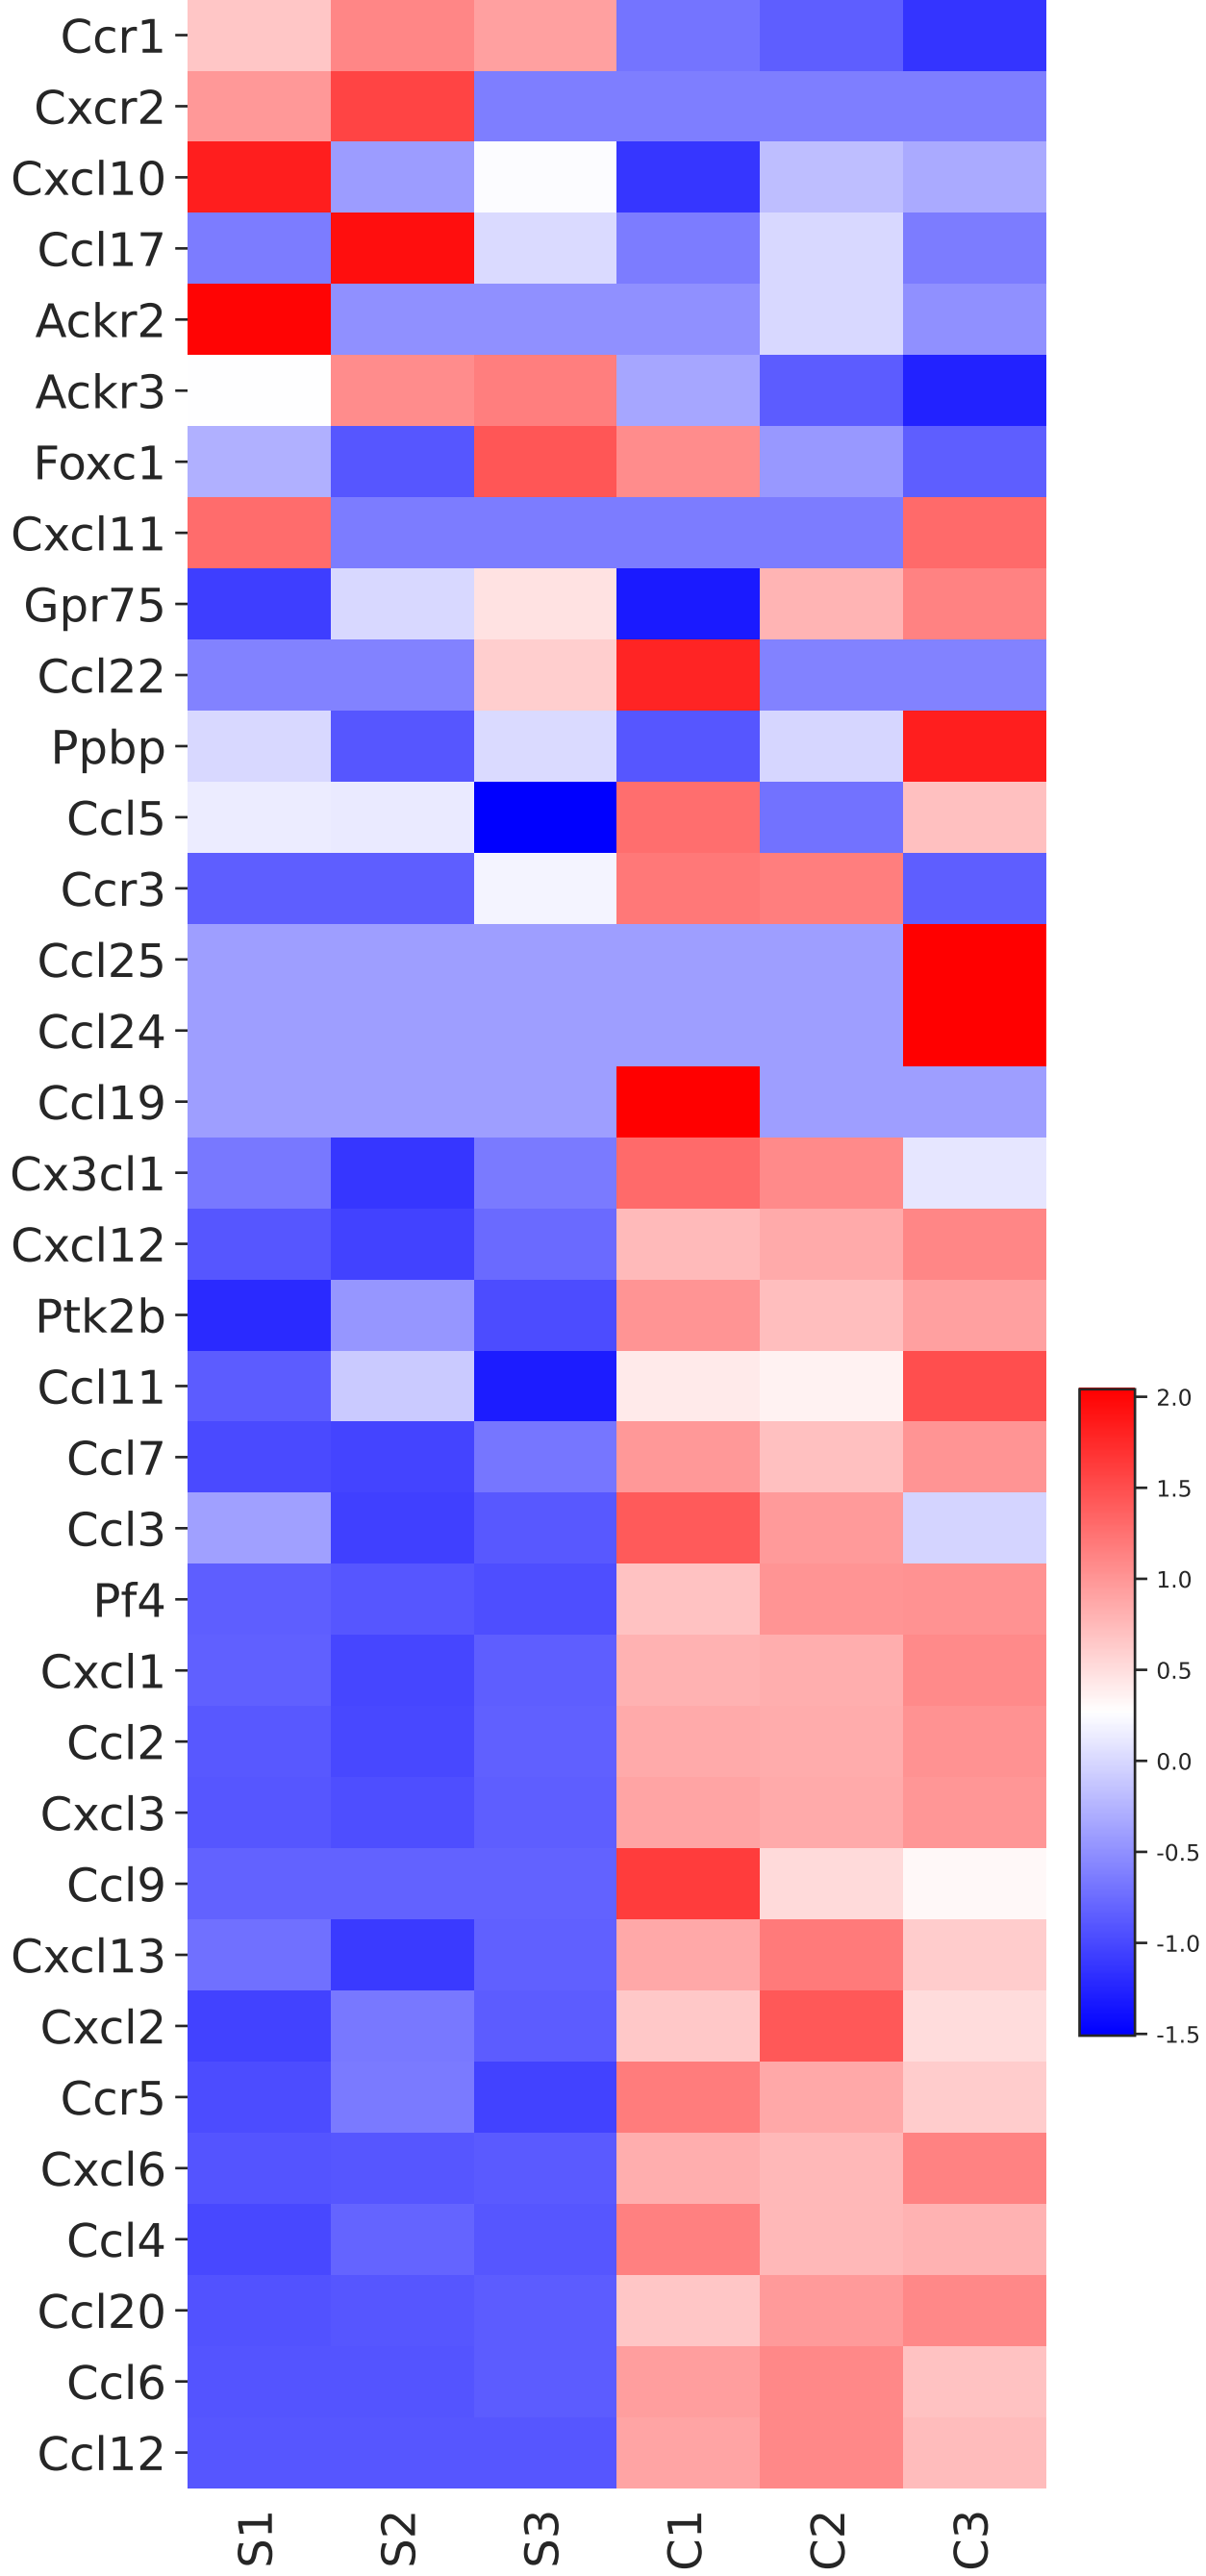

Supplement: Supplementary file 32 [file 1965_chemokine-mediated signaling pathway(GO_0070098).heatmap.pdf › Source data/1.RNA-Seq source data/1.BMSCs/result/1.6.GSEA/S-vs-C/go/BP/1965_chemokine-mediated signaling pathway(GO_0070098).heatmap.pdf]

# neutrophil chemotaxis(GO:0030593)

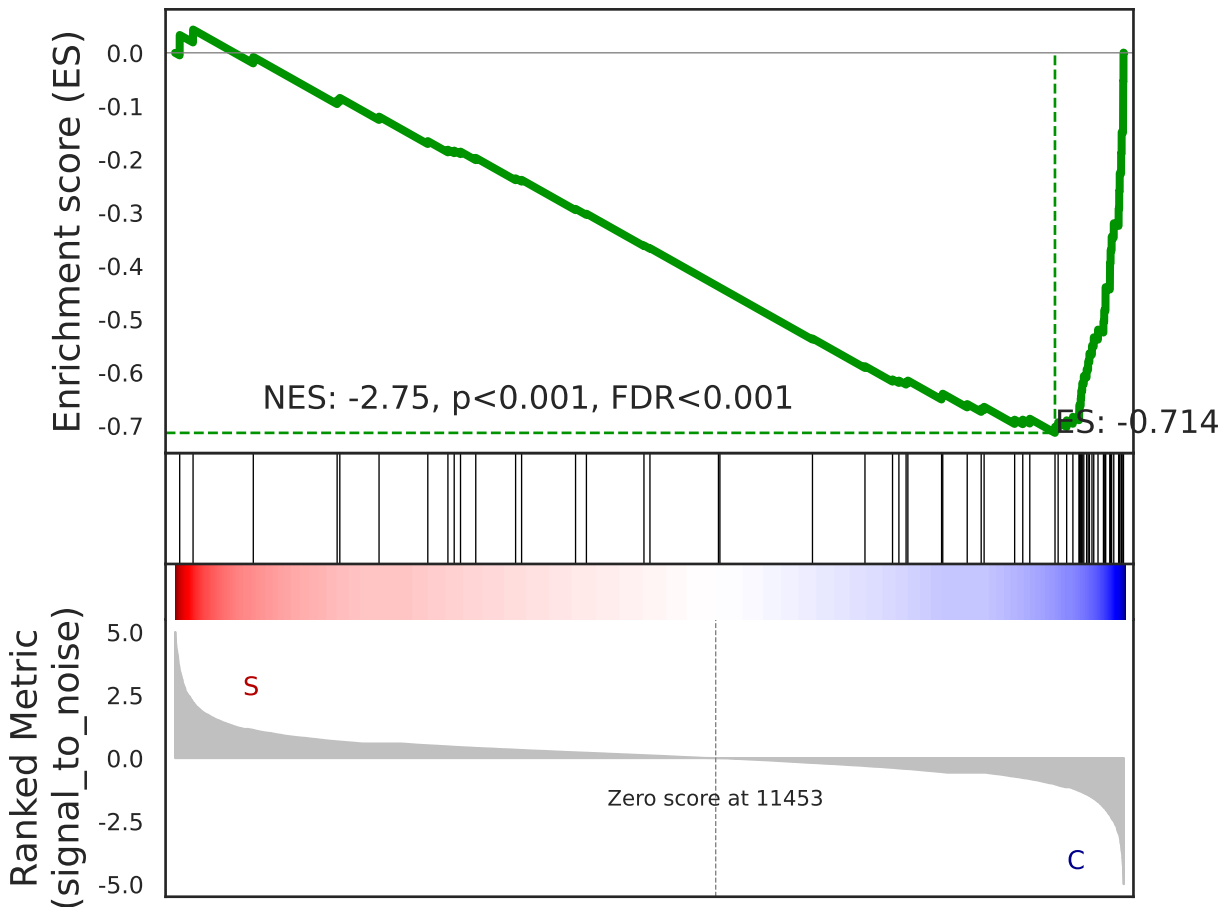

Supplement: Supplementary file 33 [file 1966_neutrophil chemotaxis(GO_0030593).gsea.pdf › Source data/1.RNA-Seq source data/1.BMSCs/result/1.6.GSEA/S-vs-C/go/BP/1966_neutrophil chemotaxis(GO_0030593).gsea.pdf]

neutrophil chemotaxis(GO:0030593)  
Heatmap of the Analyzed GeneSet

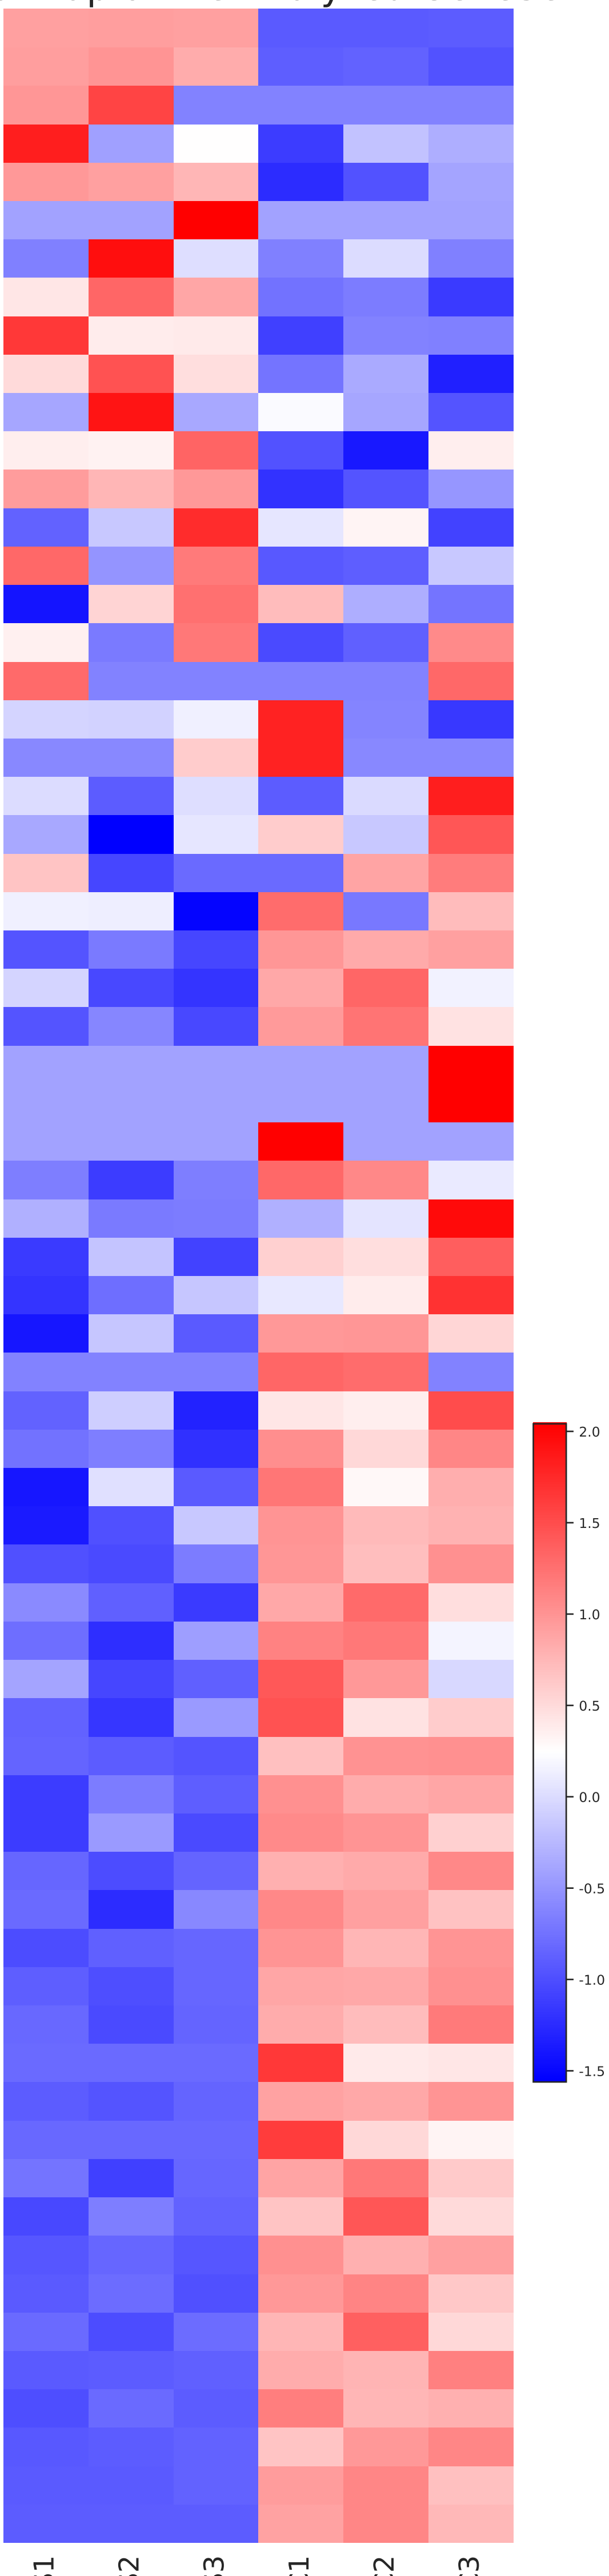

Supplement: Supplementary file 34 [file 1966_neutrophil chemotaxis(GO_0030593).heatmap.pdf › Source data/1.RNA-Seq source data/1.BMSCs/result/1.6.GSEA/S-vs-C/go/BP/1966_neutrophil chemotaxis(GO_0030593).heatmap.pdf]

# chromosome segregation(GO:0007059)

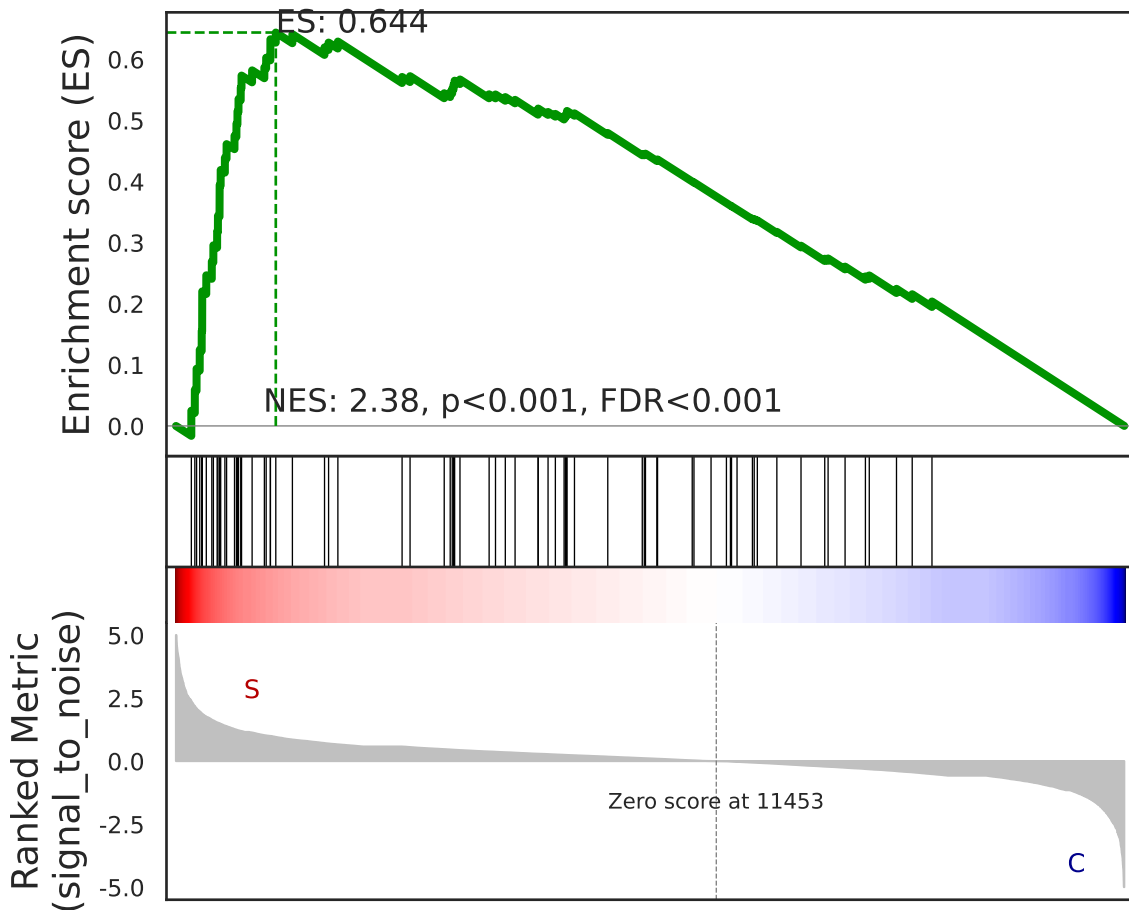

Supplement: Supplementary file 35 [file 1_chromosome segregation(GO_0007059).gsea.pdf › Source data/1.RNA-Seq source data/1.BMSCs/result/1.6.GSEA/S-vs-C/go/BP/1_chromosome segregation(GO_0007059).gsea.pdf]

chromosome segregation(GO:0007059)  
Heatmap of the Analyzed GeneSet

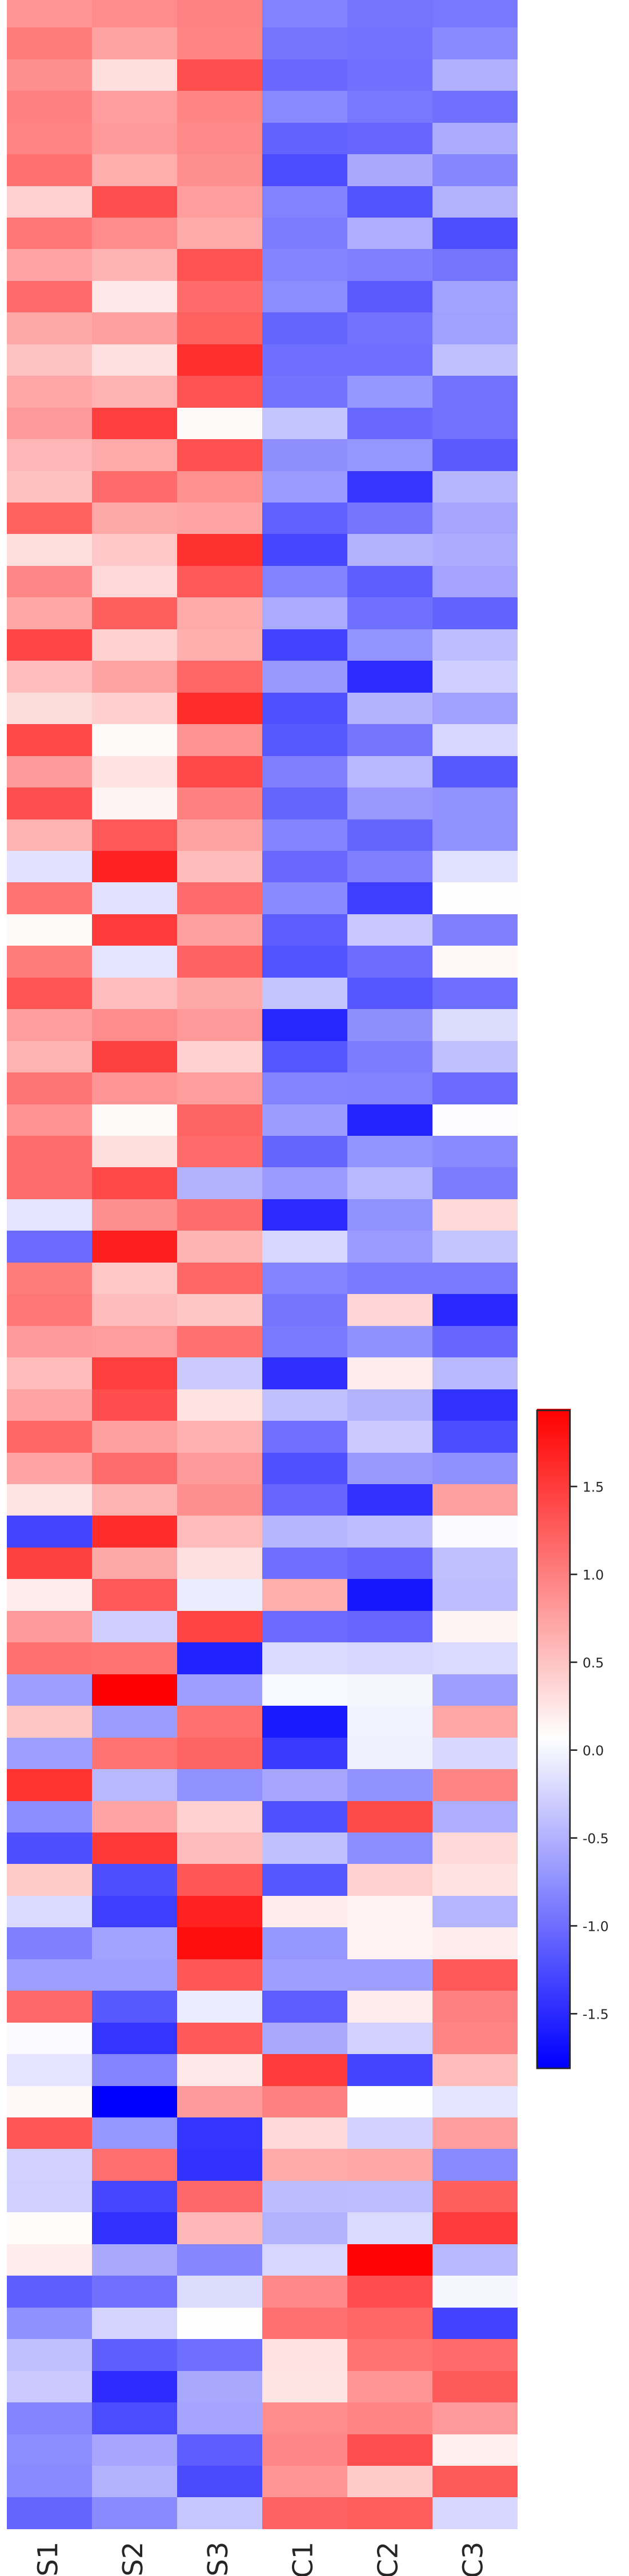

Supplement: Supplementary file 36 [file 1_chromosome segregation(GO_0007059).heatmap.pdf › Source data/1.RNA-Seq source data/1.BMSCs/result/1.6.GSEA/S-vs-C/go/BP/1_chromosome segregation(GO_0007059).heatmap.pdf]

# mitotic sister chromatid segregation(GO:0000070)

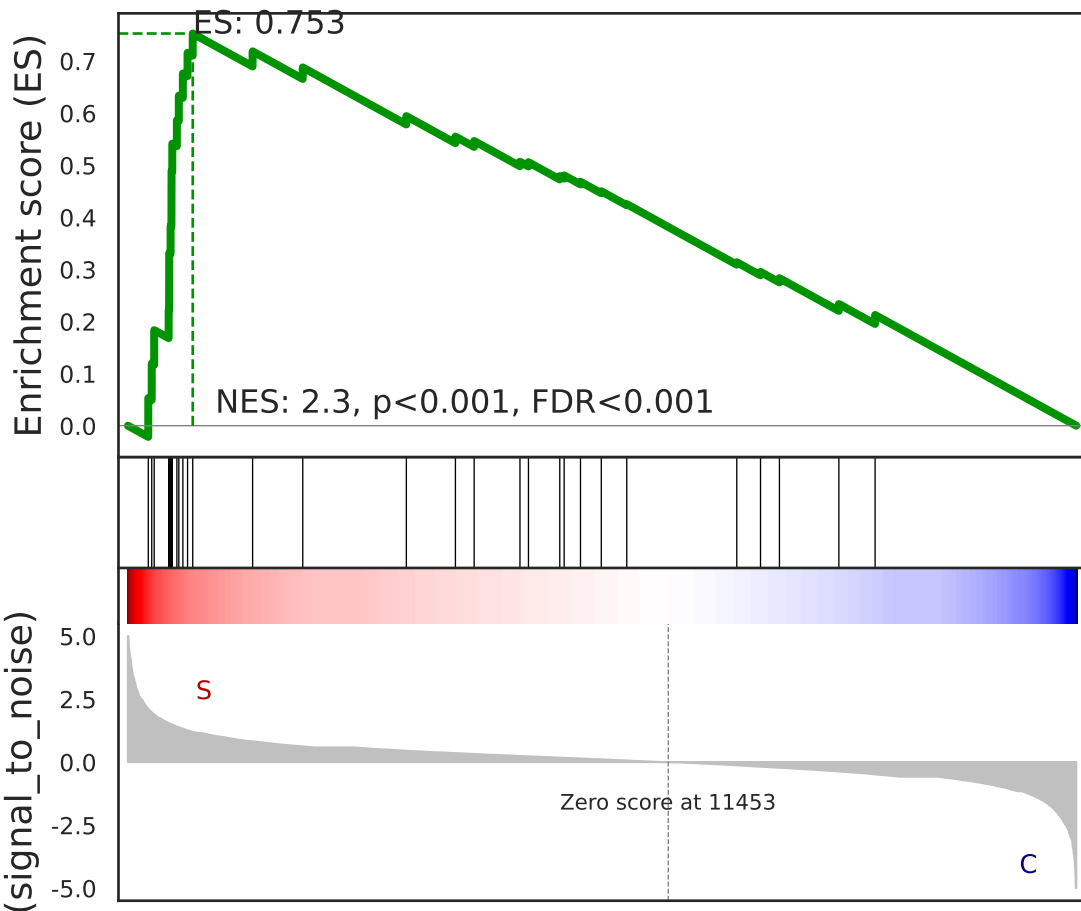

Supplement: Supplementary file 37 [file 2_mitotic sister chromatid segregation(GO_0000070).gsea.pdf › Source data/1.RNA-Seq source data/1.BMSCs/result/1.6.GSEA/S-vs-C/go/BP/2_mitotic sister chromatid segregation(GO_0000070).gsea.pdf]

mitotic sister chromatid segregation(GO:0000070)  
Heatmap of the Analyzed GeneSet

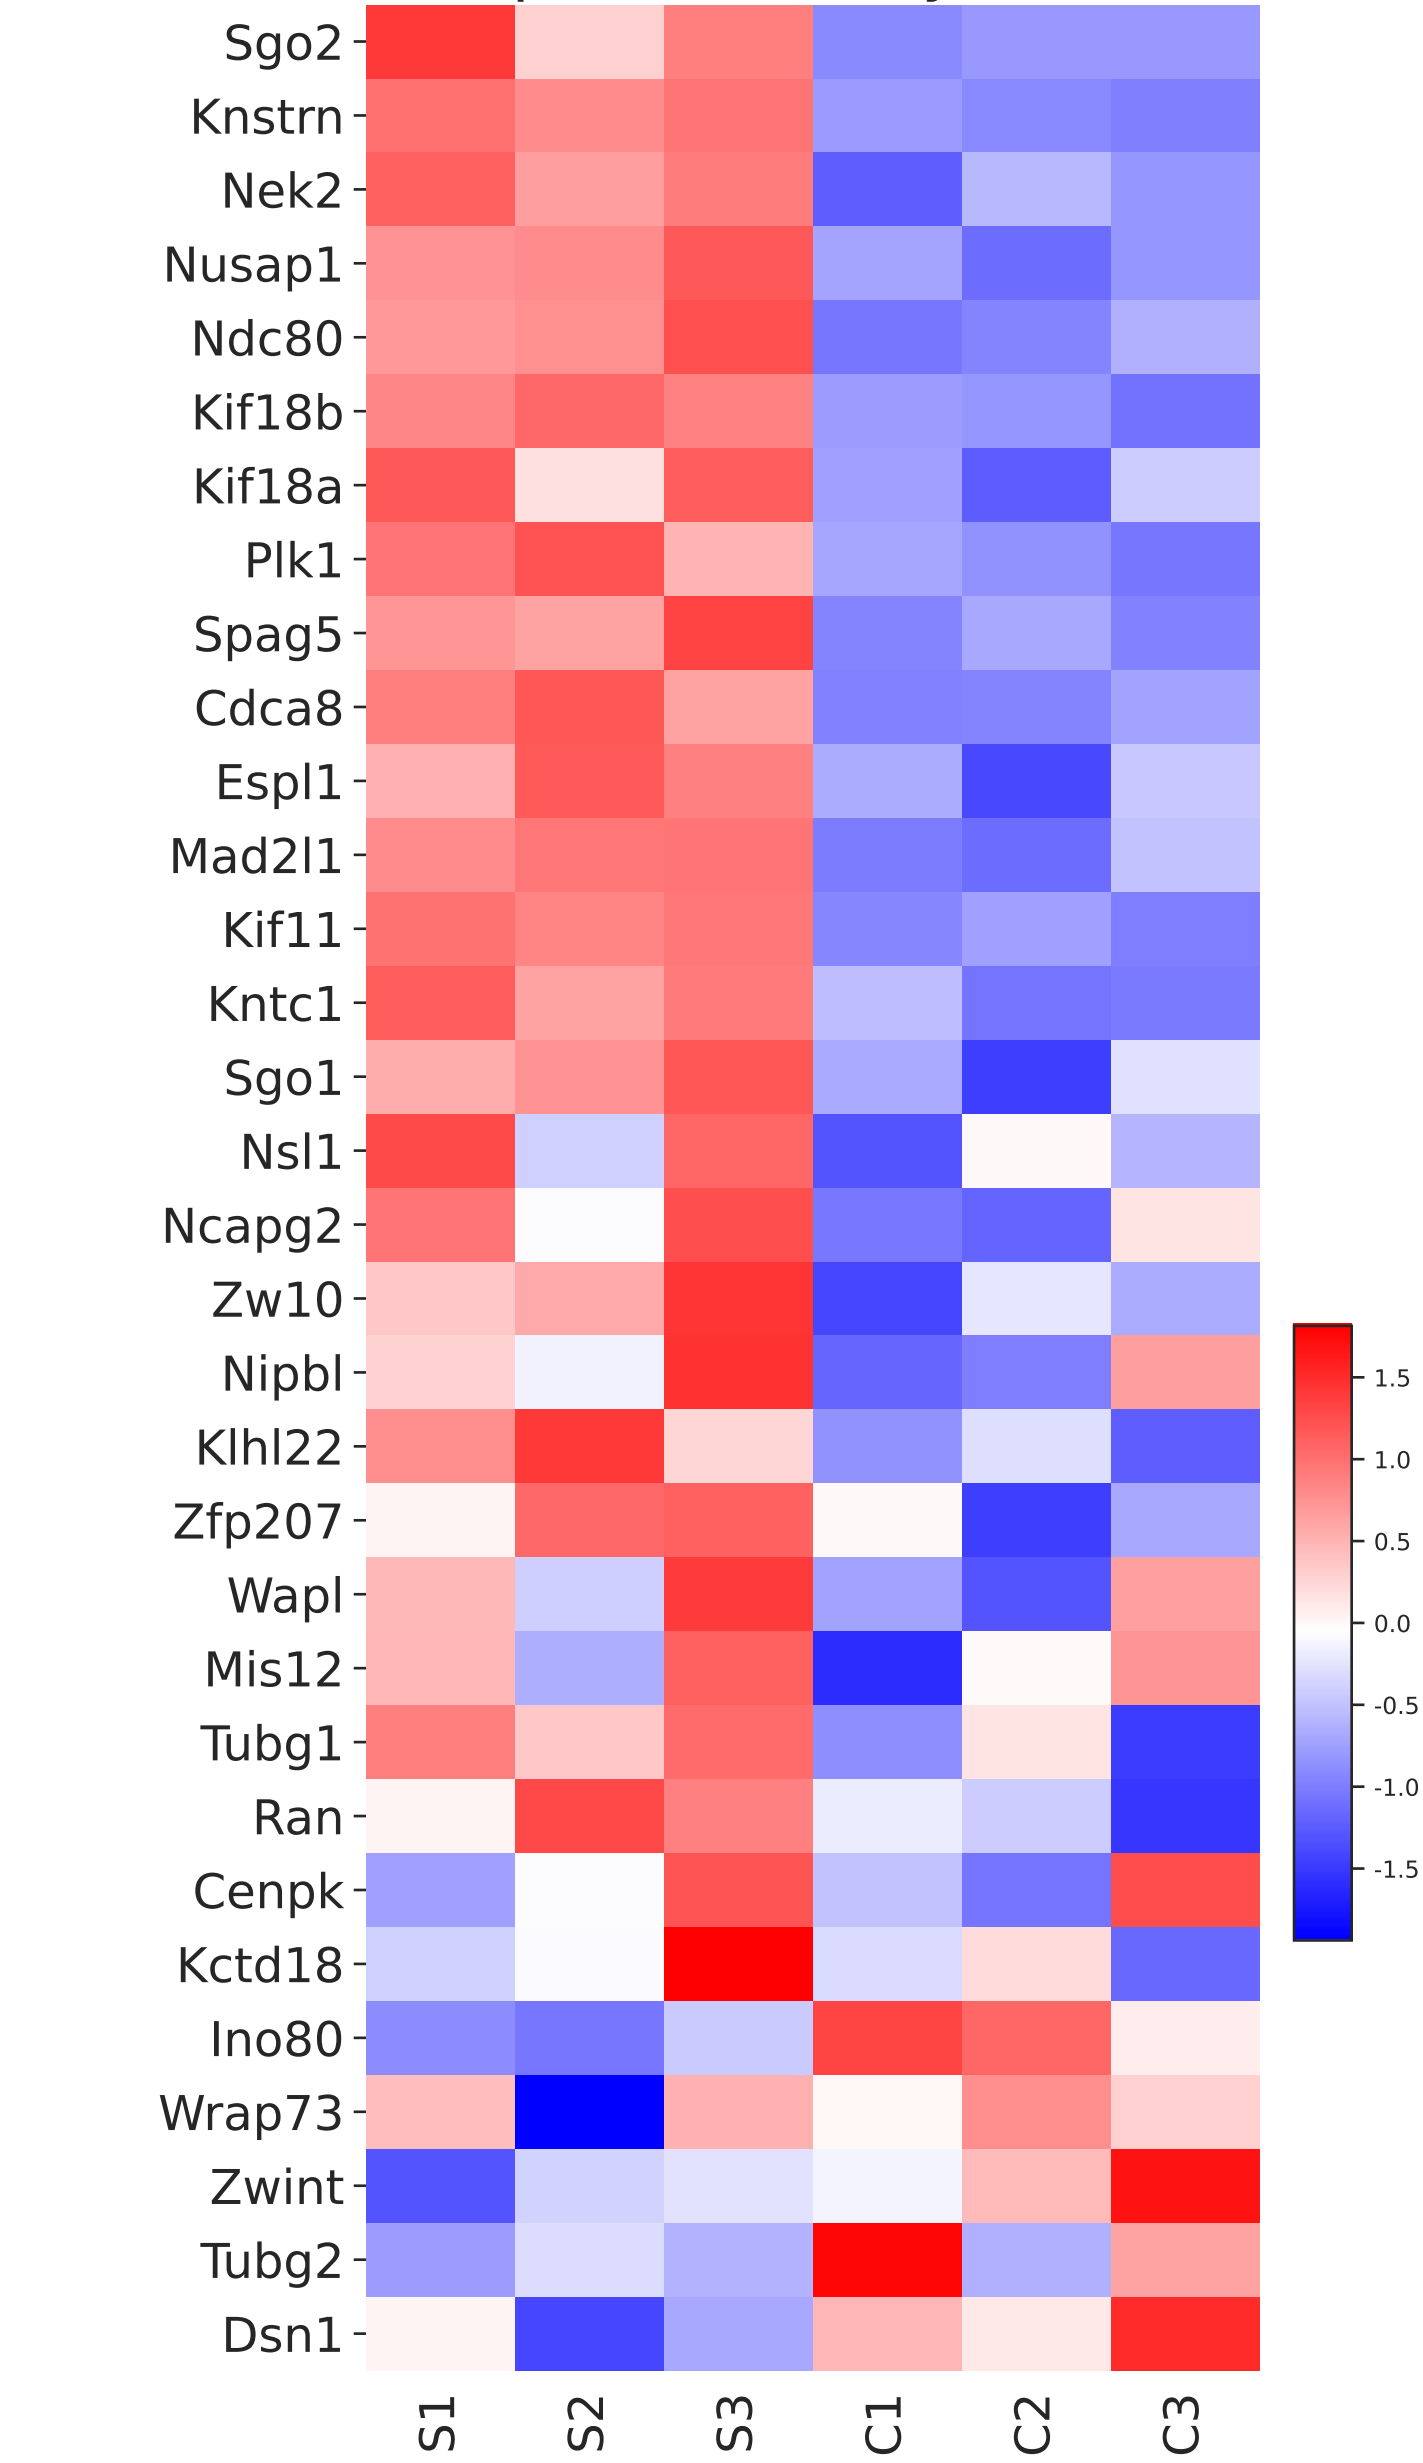

Supplement: Supplementary file 38 [file 2_mitotic sister chromatid segregation(GO_0000070).heatmap.pdf › Source data/1.RNA-Seq source data/1.BMSCs/result/1.6.GSEA/S-vs-C/go/BP/2_mitotic sister chromatid segregation(GO_0000070).heatmap.pdf]

# xenobiotic metabolic process(GO:0006805)

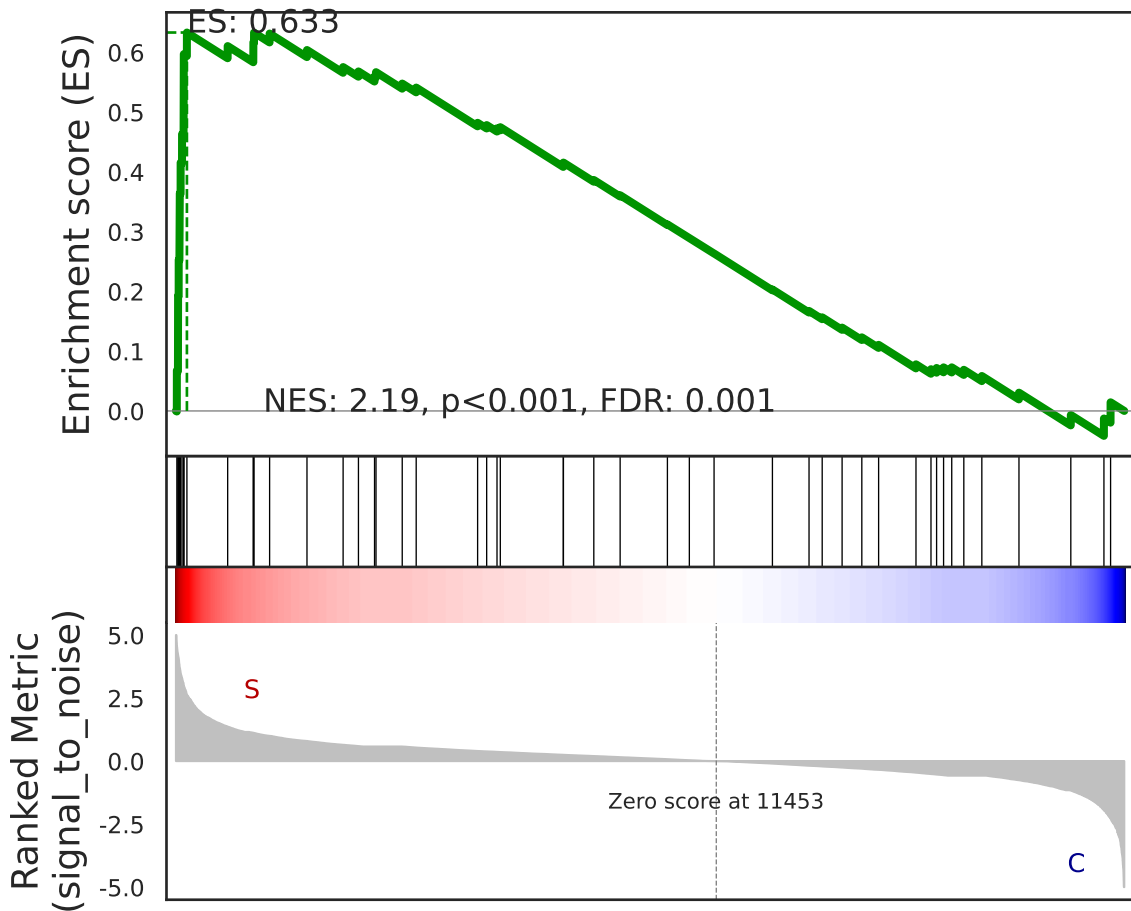

Supplement: Supplementary file 39 [file 3_xenobiotic metabolic process(GO_0006805).gsea.pdf › Source data/1.RNA-Seq source data/1.BMSCs/result/1.6.GSEA/S-vs-C/go/BP/3_xenobiotic metabolic process(GO_0006805).gsea.pdf]

xenobiotic metabolic process(GO:0006805)  
Heatmap of the Analyzed GeneSet

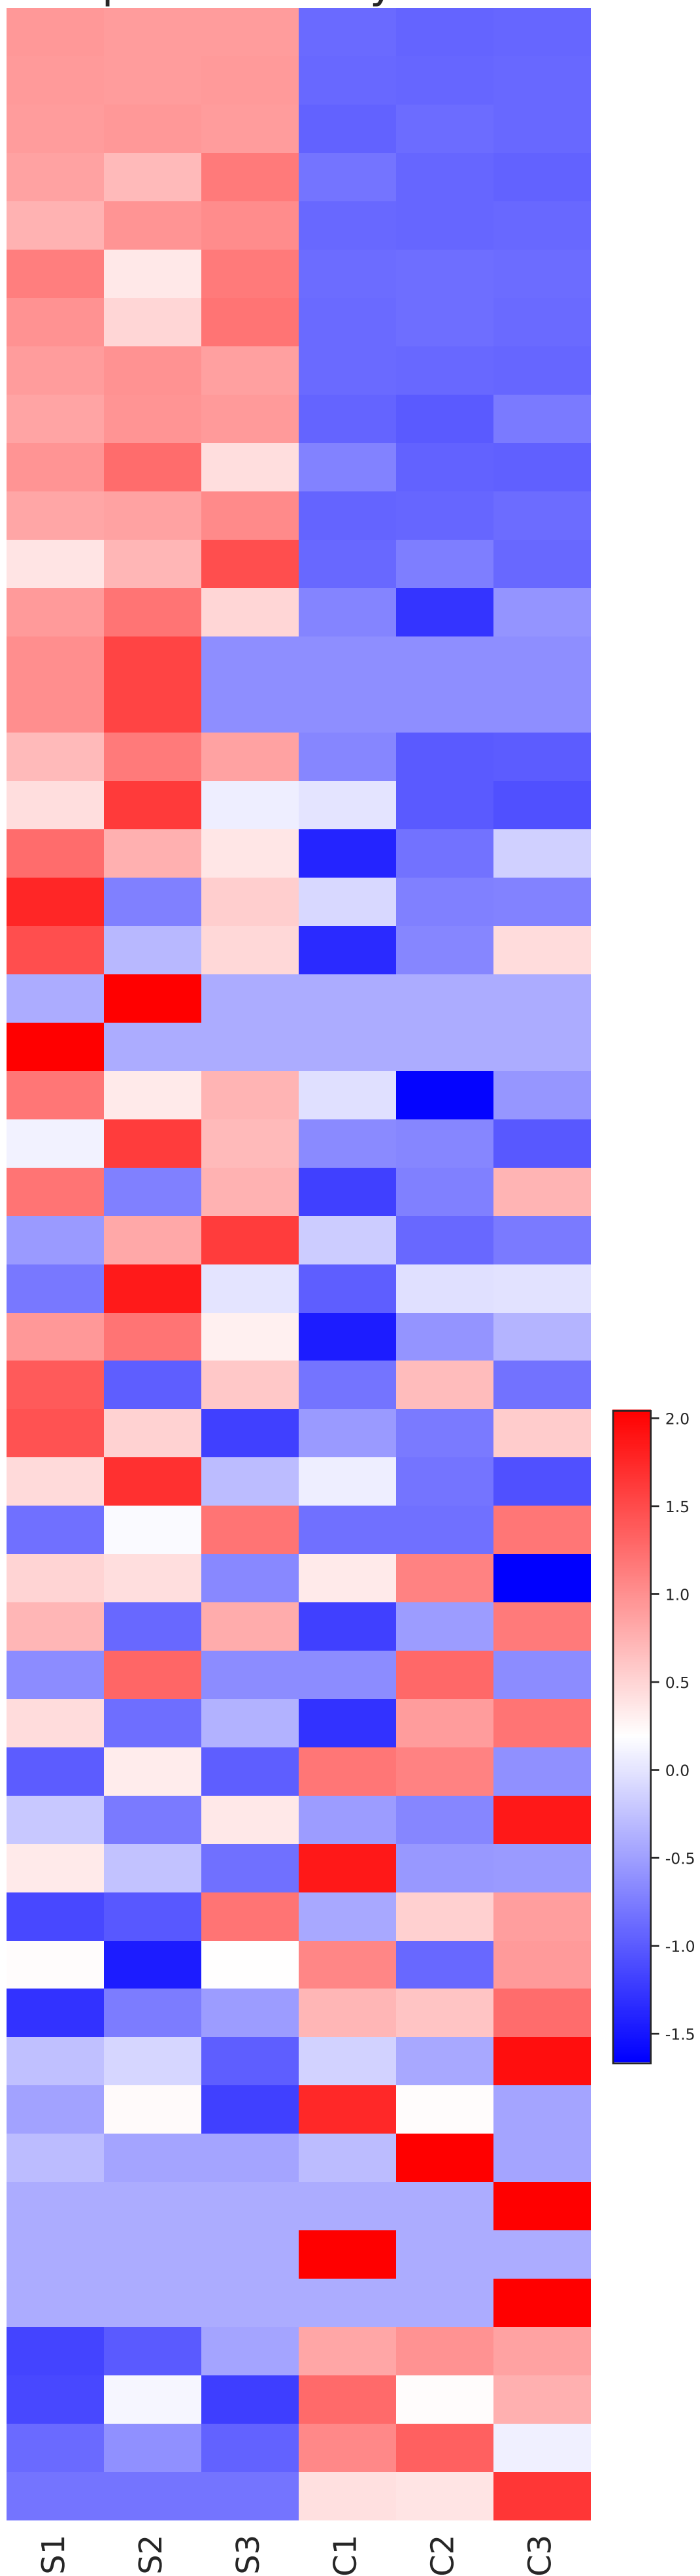

Supplement: Supplementary file 40 [file 3_xenobiotic metabolic process(GO_0006805).heatmap.pdf › Source data/1.RNA-Seq source data/1.BMSCs/result/1.6.GSEA/S-vs-C/go/BP/3_xenobiotic metabolic process(GO_0006805).heatmap.pdf]

# iron ion transport(GO:0006826)

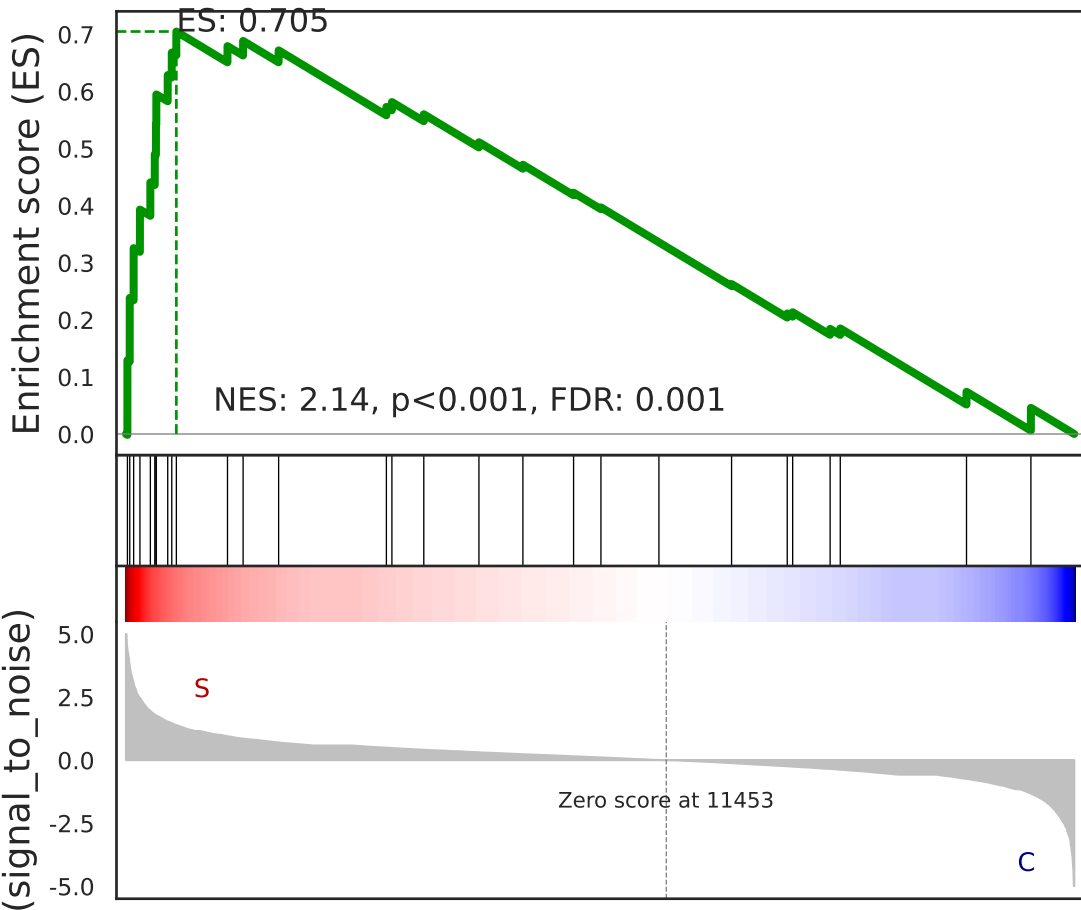

Supplement: Supplementary file 41 [file 4_iron ion transport(GO_0006826).gsea.pdf › Source data/1.RNA-Seq source data/1.BMSCs/result/1.6.GSEA/S-vs-C/go/BP/4_iron ion transport(GO_0006826).gsea.pdf]

iron ion transport(GO:0006826)  
Heatmap of the Analyzed GeneSet

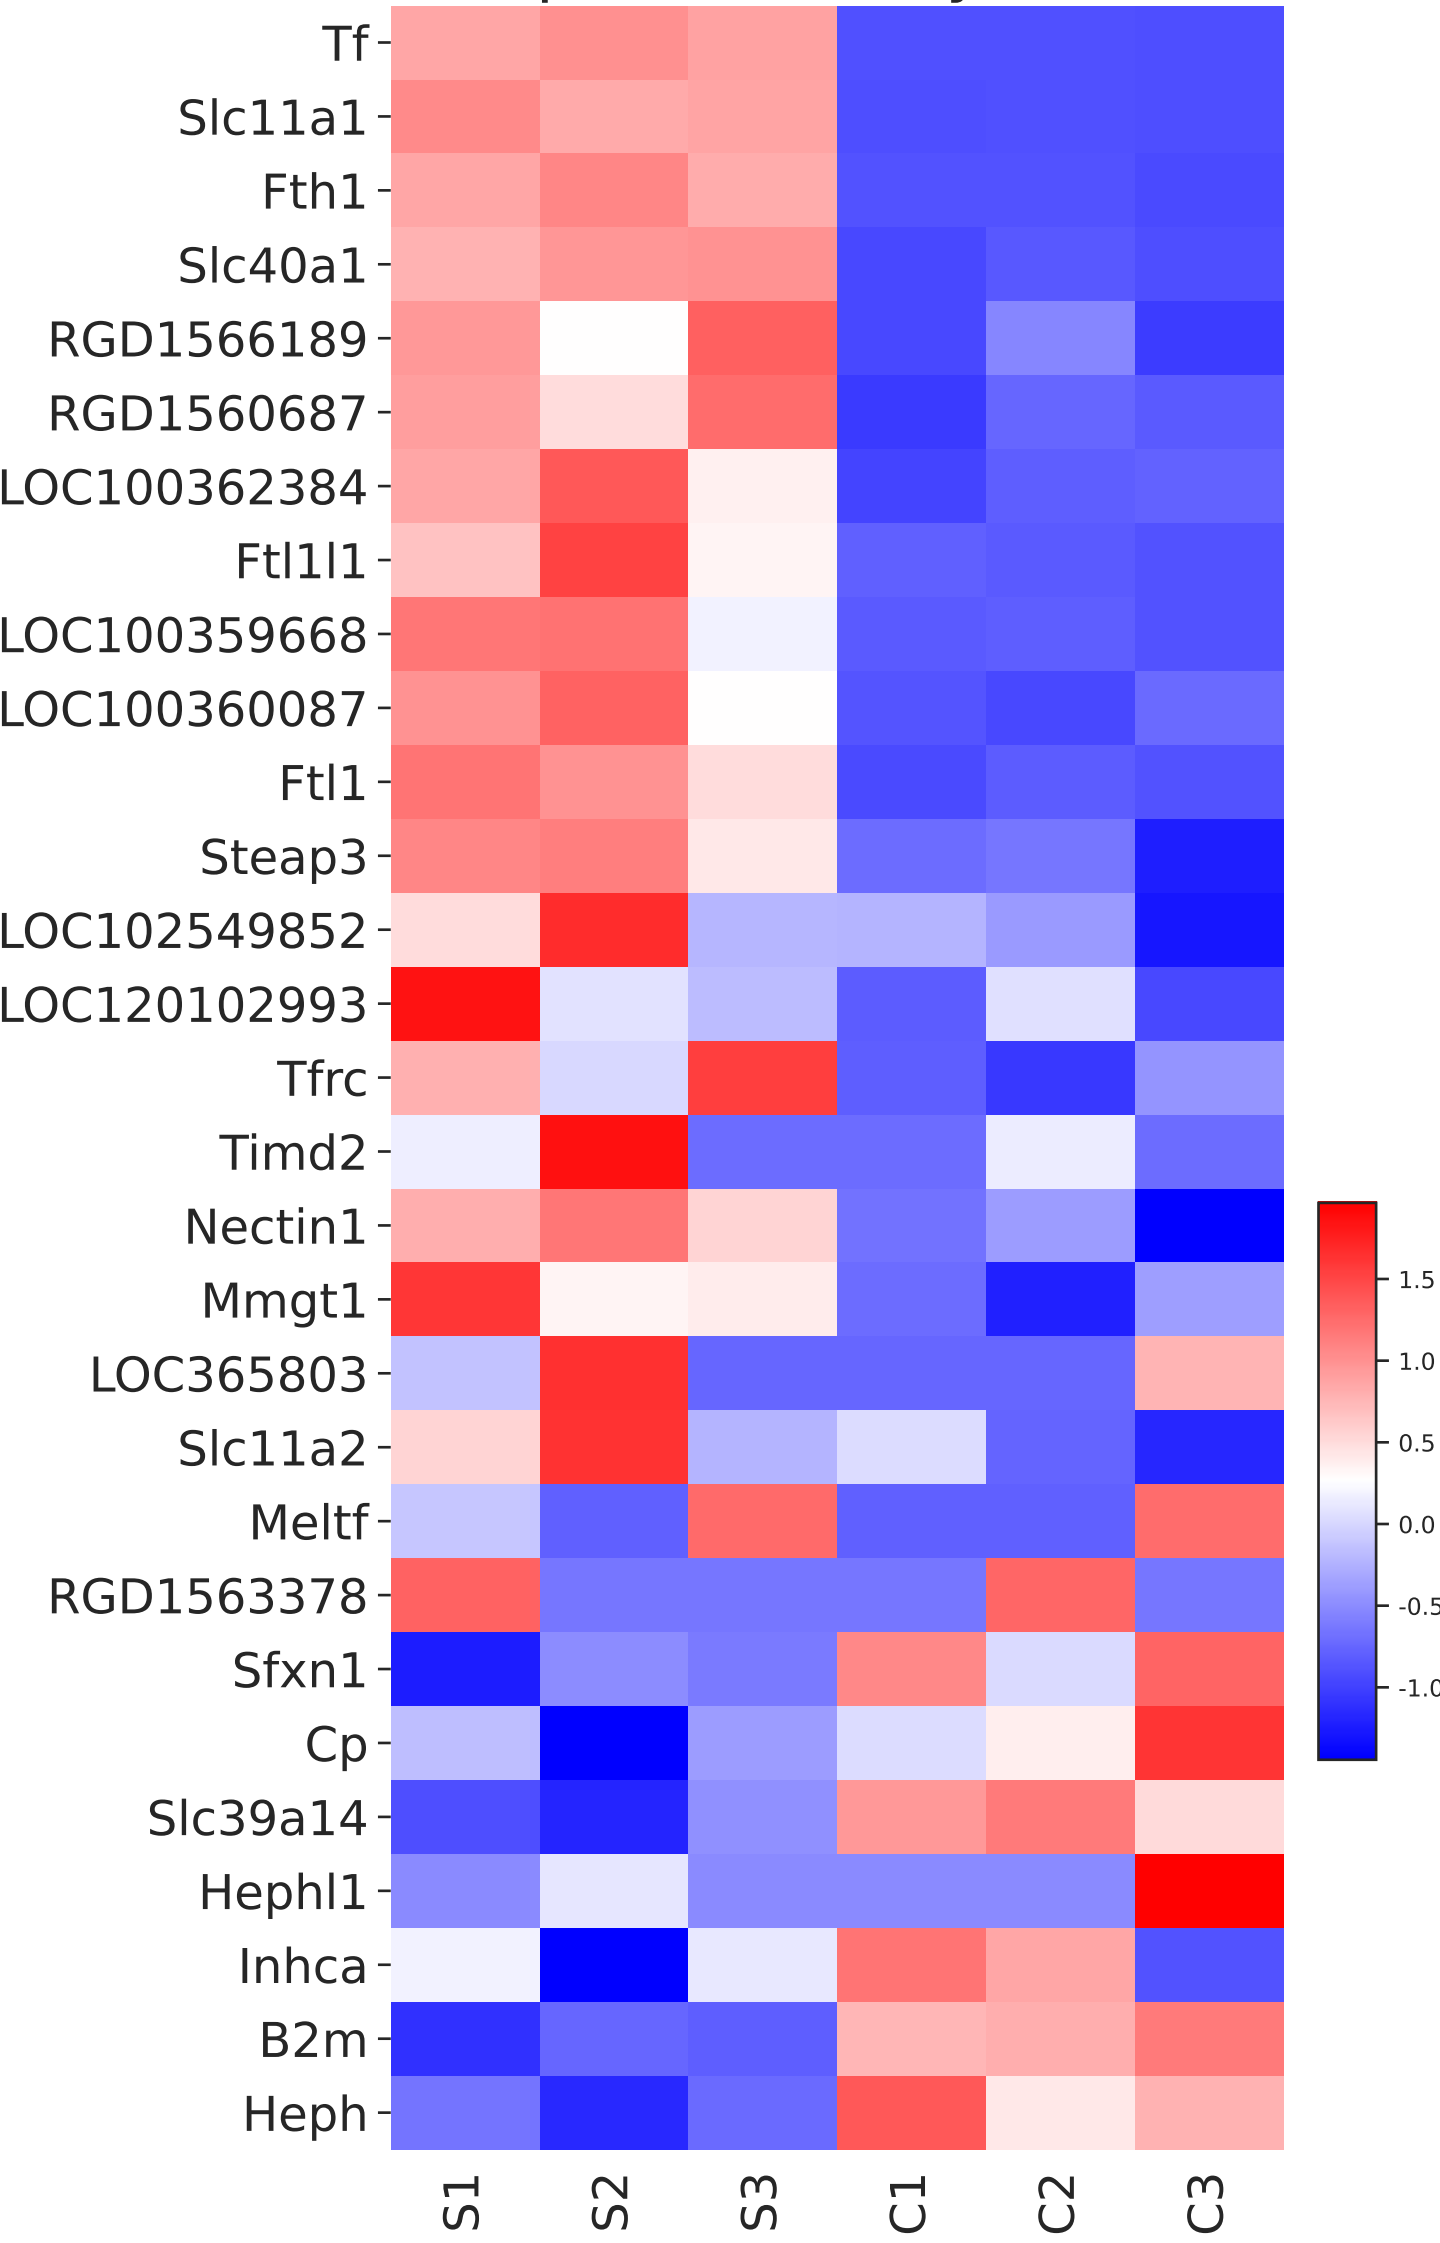

Supplement: Supplementary file 42 [file 4_iron ion transport(GO_0006826).heatmap.pdf › Source data/1.RNA-Seq source data/1.BMSCs/result/1.6.GSEA/S-vs-C/go/BP/4_iron ion transport(GO_0006826).heatmap.pdf]

# glutathione metabolic process(GO:0006749)

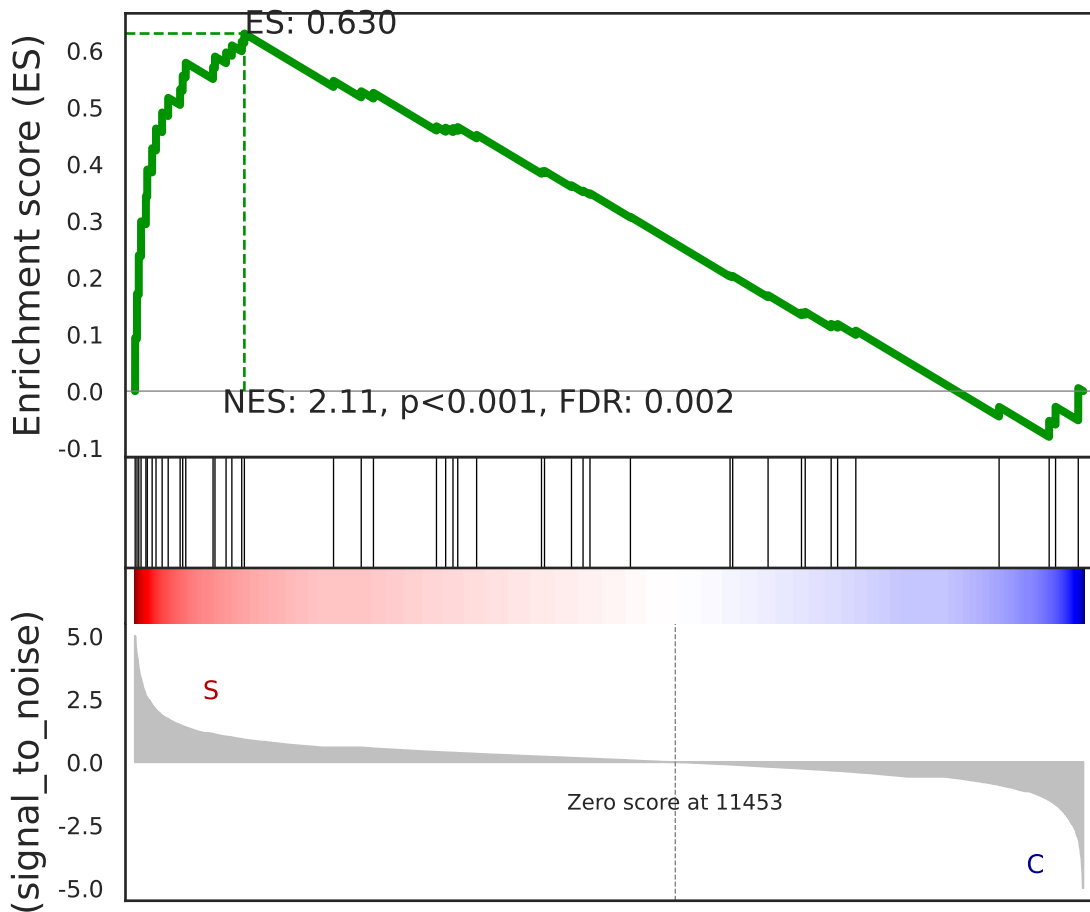

Supplement: Supplementary file 43 [file 5_glutathione metabolic process(GO_0006749).gsea.pdf › Source data/1.RNA-Seq source data/1.BMSCs/result/1.6.GSEA/S-vs-C/go/BP/5_glutathione metabolic process(GO_0006749).gsea.pdf]

glutathione metabolic process(GO:0006749)  
Heatmap of the Analyzed GeneSet

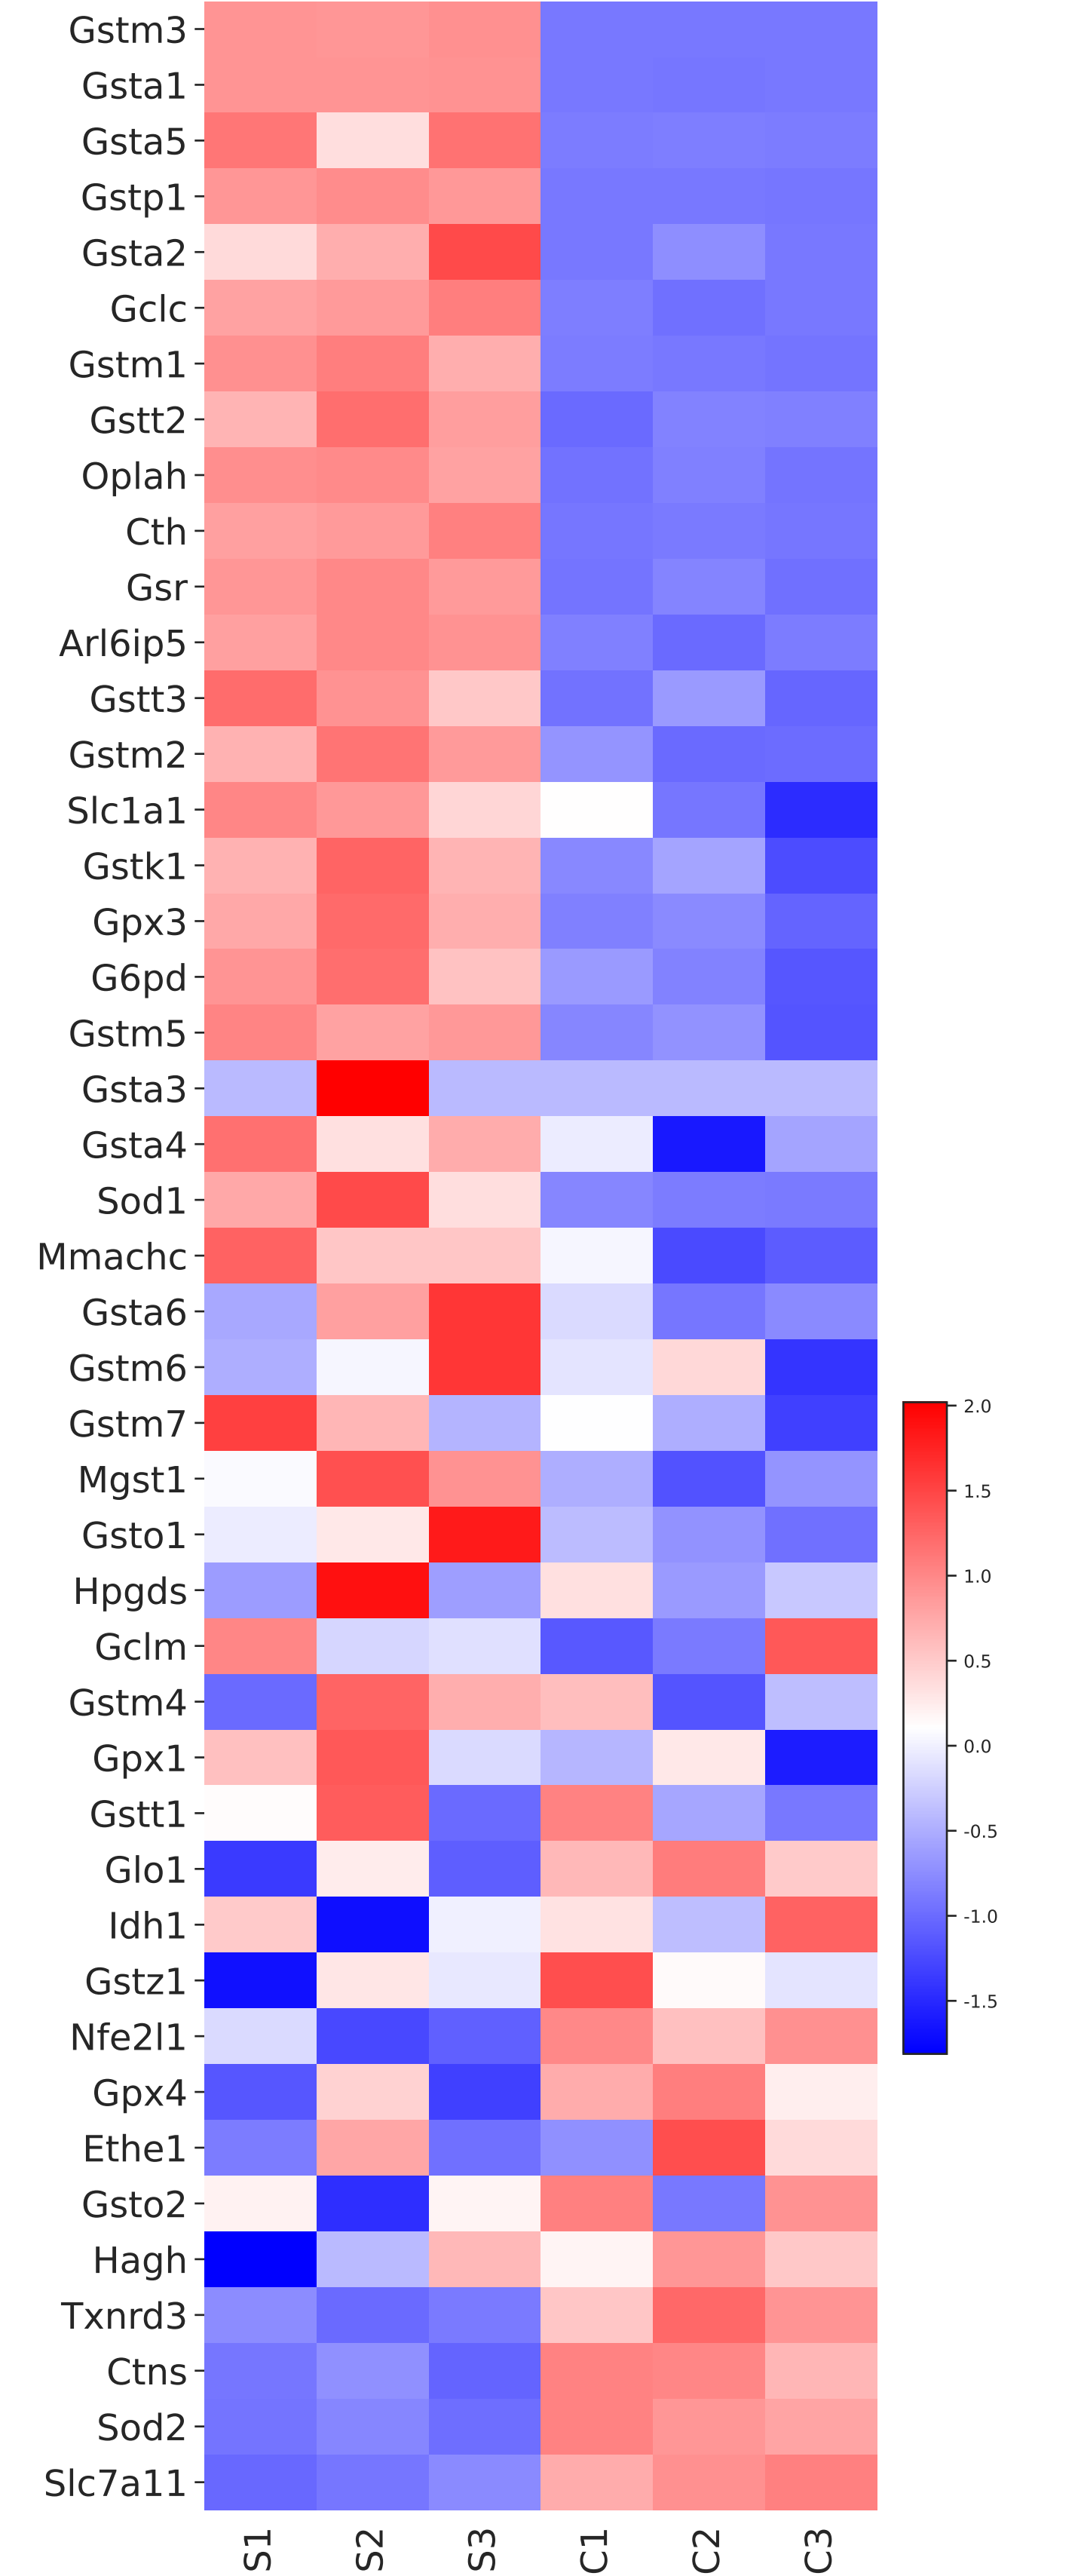

Supplement: Supplementary file 44 [file 5_glutathione metabolic process(GO_0006749).heatmap.pdf › Source data/1.RNA-Seq source data/1.BMSCs/result/1.6.GSEA/S-vs-C/go/BP/5_glutathione metabolic process(GO_0006749).heatmap.pdf]

# DNA replication(GO:0006260)

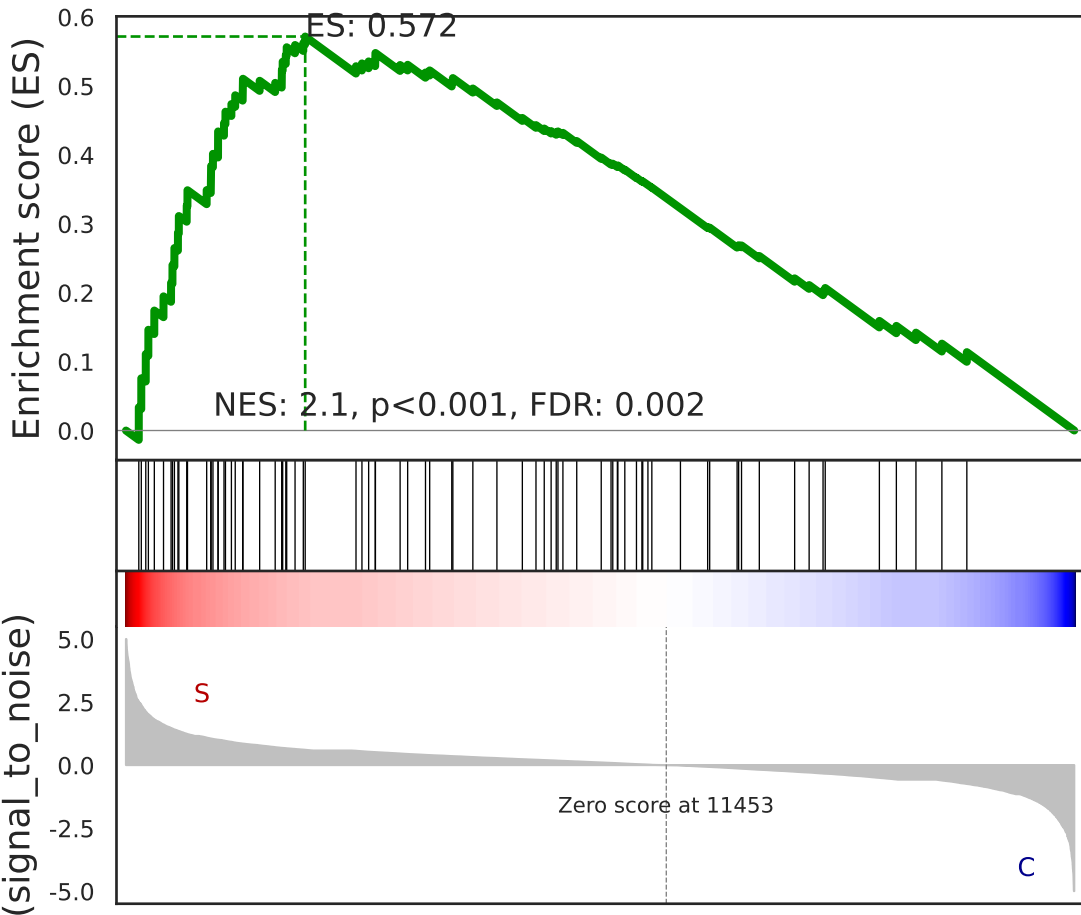

Supplement: Supplementary file 45 [file 6_DNA replication(GO_0006260).gsea.pdf › Source data/1.RNA-Seq source data/1.BMSCs/result/1.6.GSEA/S-vs-C/go/BP/6_DNA replication(GO_0006260).gsea.pdf]

DNA replication(GO:0006260)  
Heatmap of the Analyzed GeneSet

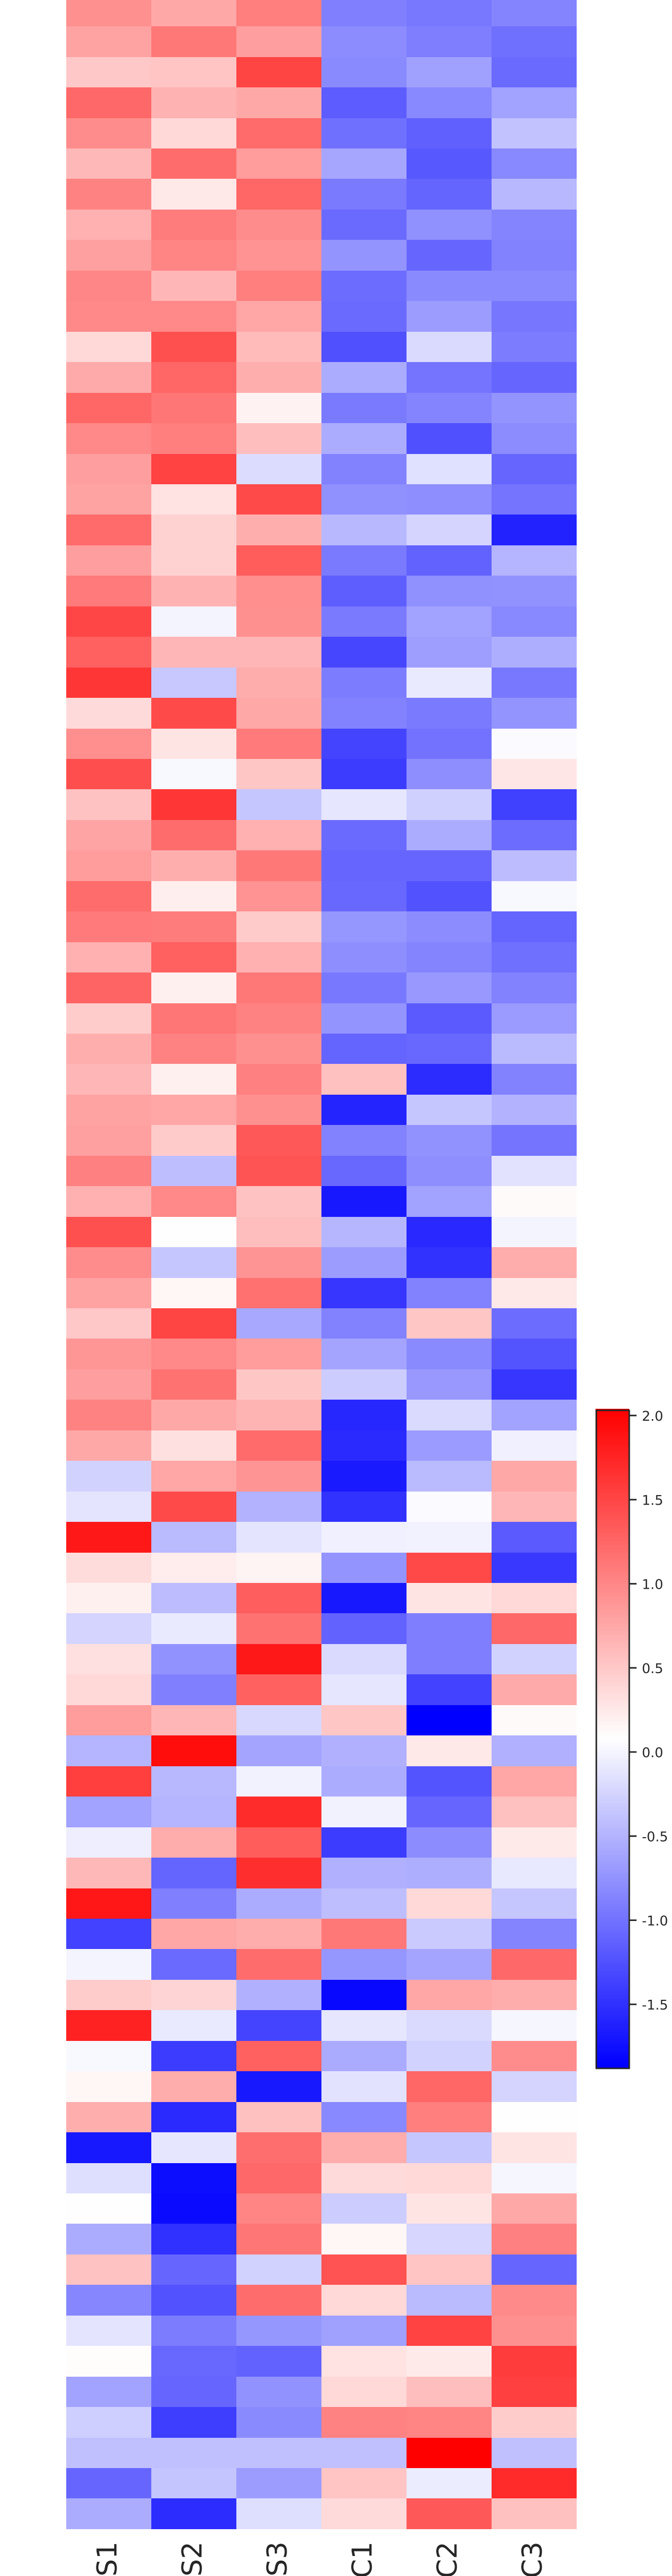

Supplement: Supplementary file 46 [file 6_DNA replication(GO_0006260).heatmap.pdf › Source data/1.RNA-Seq source data/1.BMSCs/result/1.6.GSEA/S-vs-C/go/BP/6_DNA replication(GO_0006260).heatmap.pdf]

# xenobiotic catabolic process(GO:0042178)

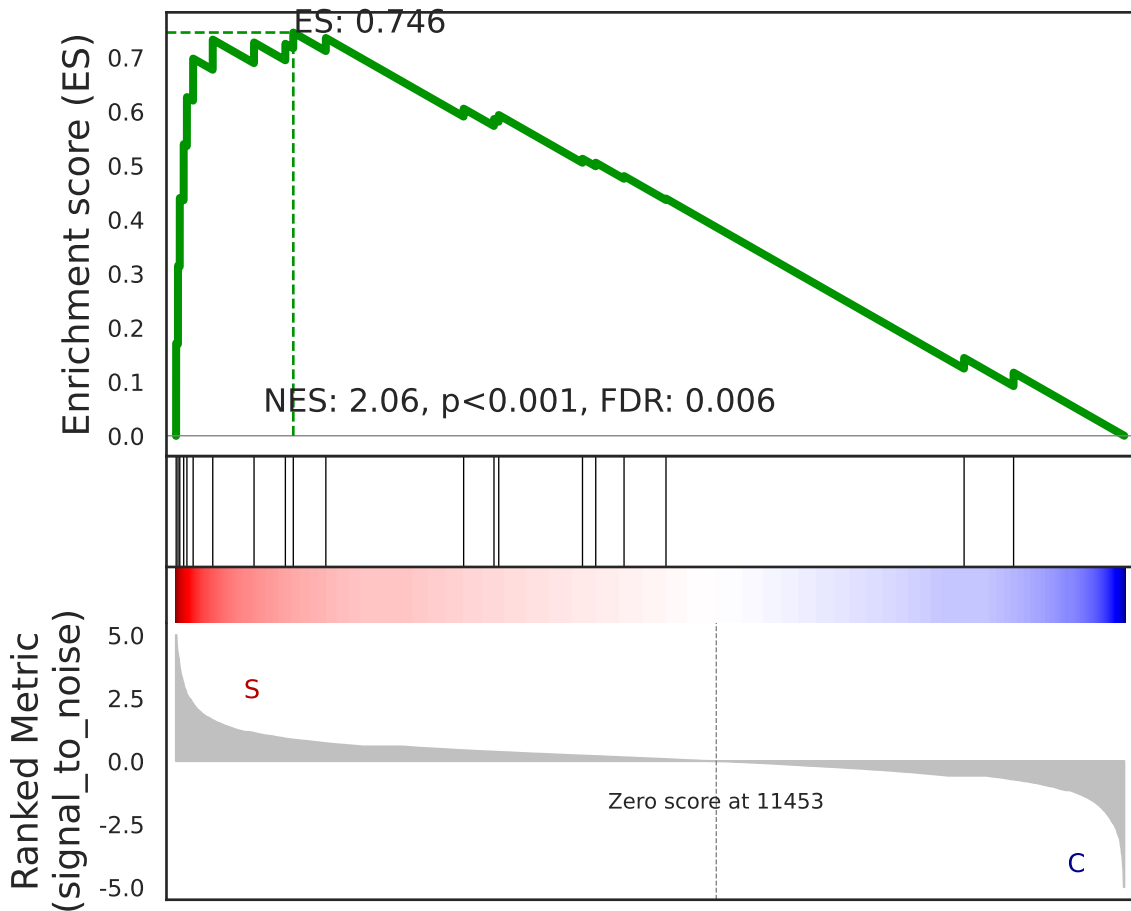

Supplement: Supplementary file 47 [file 7_xenobiotic catabolic process(GO_0042178).gsea.pdf › Source data/1.RNA-Seq source data/1.BMSCs/result/1.6.GSEA/S-vs-C/go/BP/7_xenobiotic catabolic process(GO_0042178).gsea.pdf]

xenobiotic catabolic process(GO:0042178)  
Heatmap of the Analyzed GeneSet

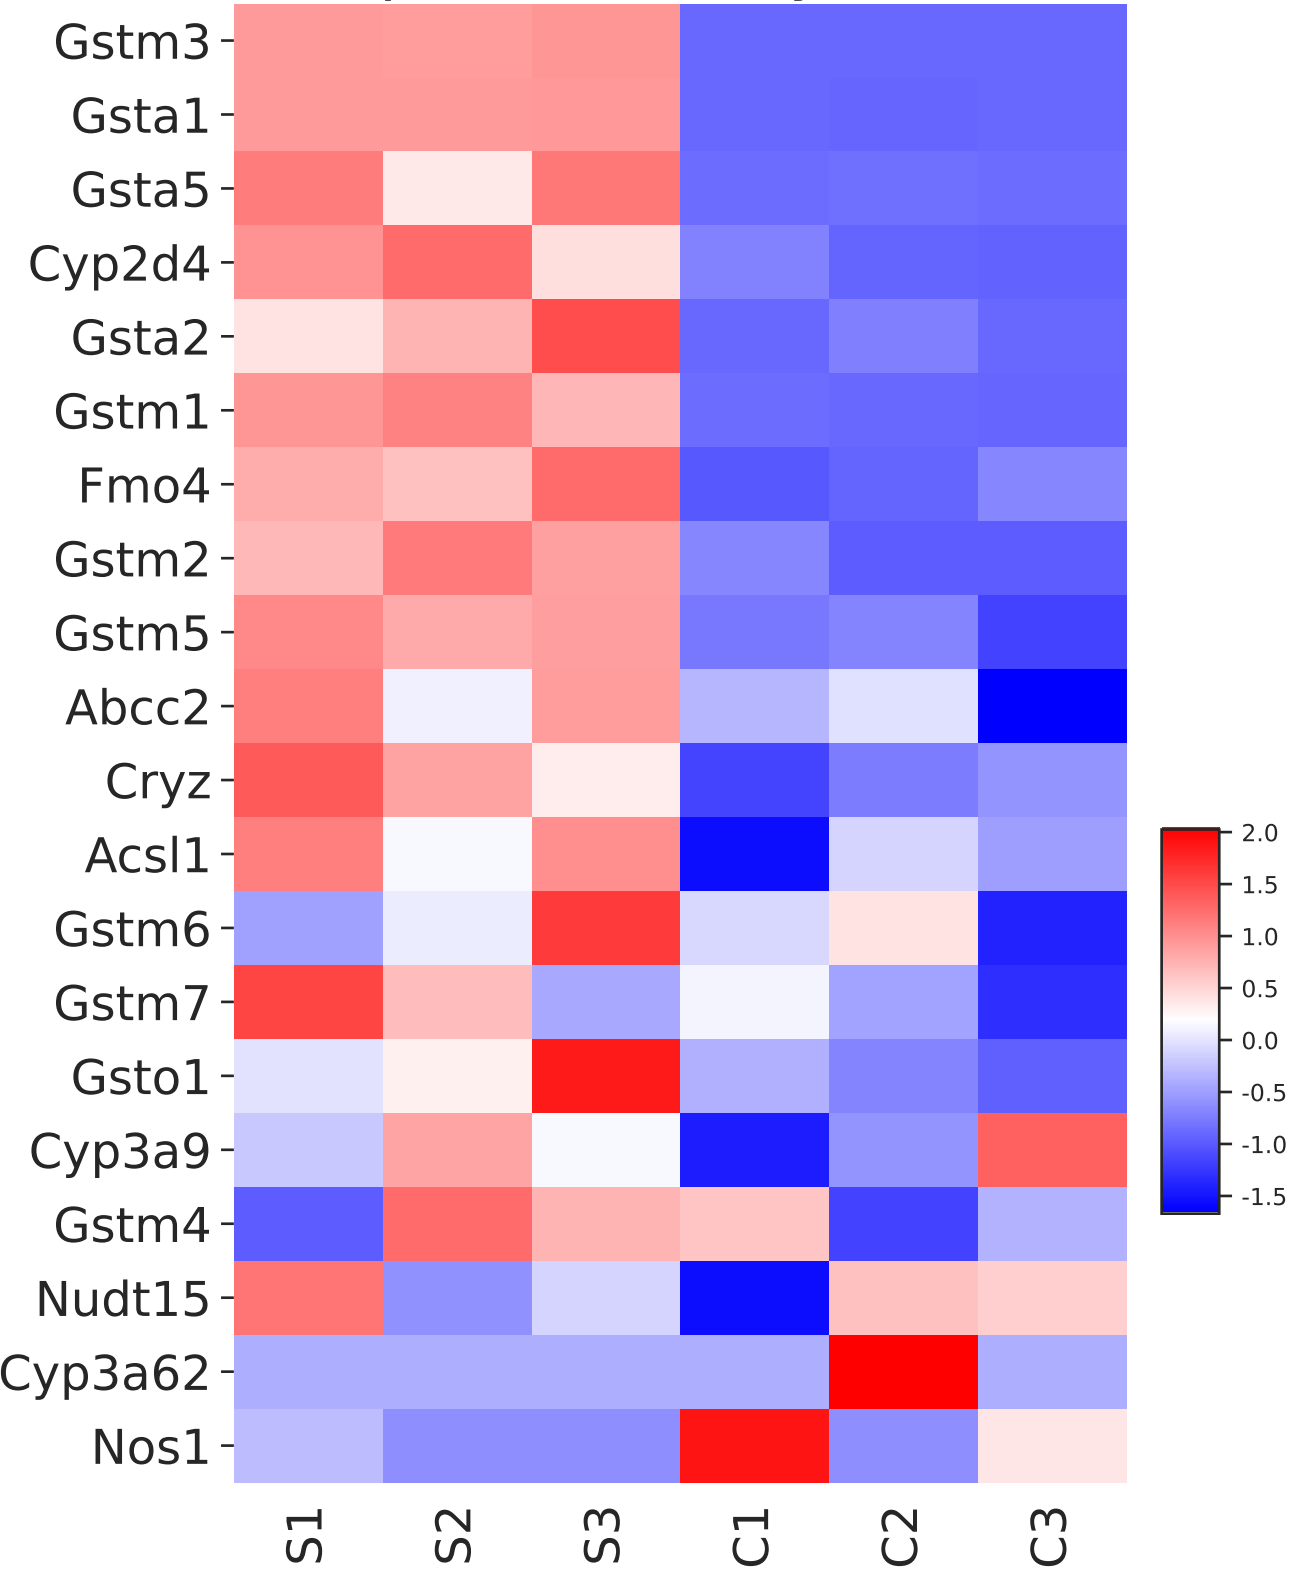

Supplement: Supplementary file 48 [file 7_xenobiotic catabolic process(GO_0042178).heatmap.pdf › Source data/1.RNA-Seq source data/1.BMSCs/result/1.6.GSEA/S-vs-C/go/BP/7_xenobiotic catabolic process(GO_0042178).heatmap.pdf]

# cellular iron ion homeostasis(GO:0006879)

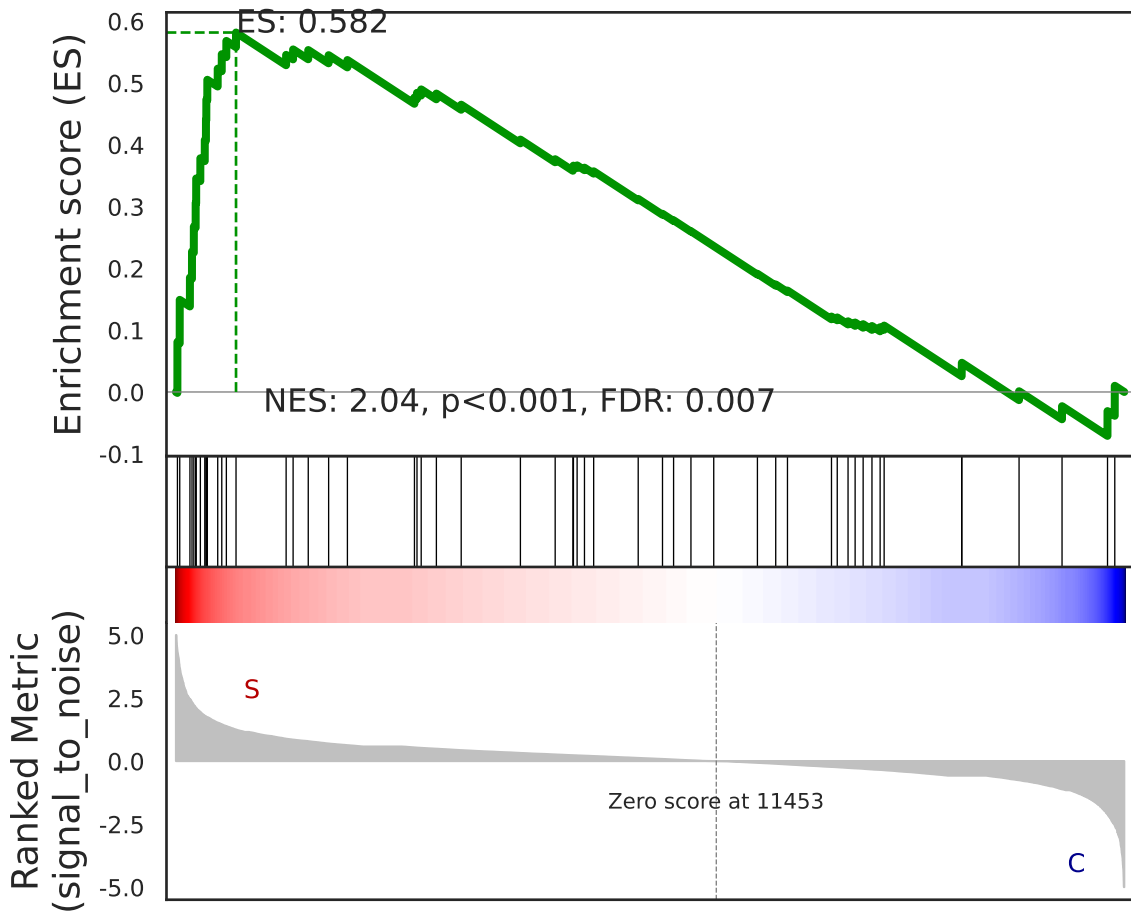

Supplement: Supplementary file 49 [file 8_cellular iron ion homeostasis(GO_0006879).gsea.pdf › Source data/1.RNA-Seq source data/1.BMSCs/result/1.6.GSEA/S-vs-C/go/BP/8_cellular iron ion homeostasis(GO_0006879).gsea.pdf]

cellular iron ion homeostasis(GO:0006879)  
Heatmap of the Analyzed GeneSet

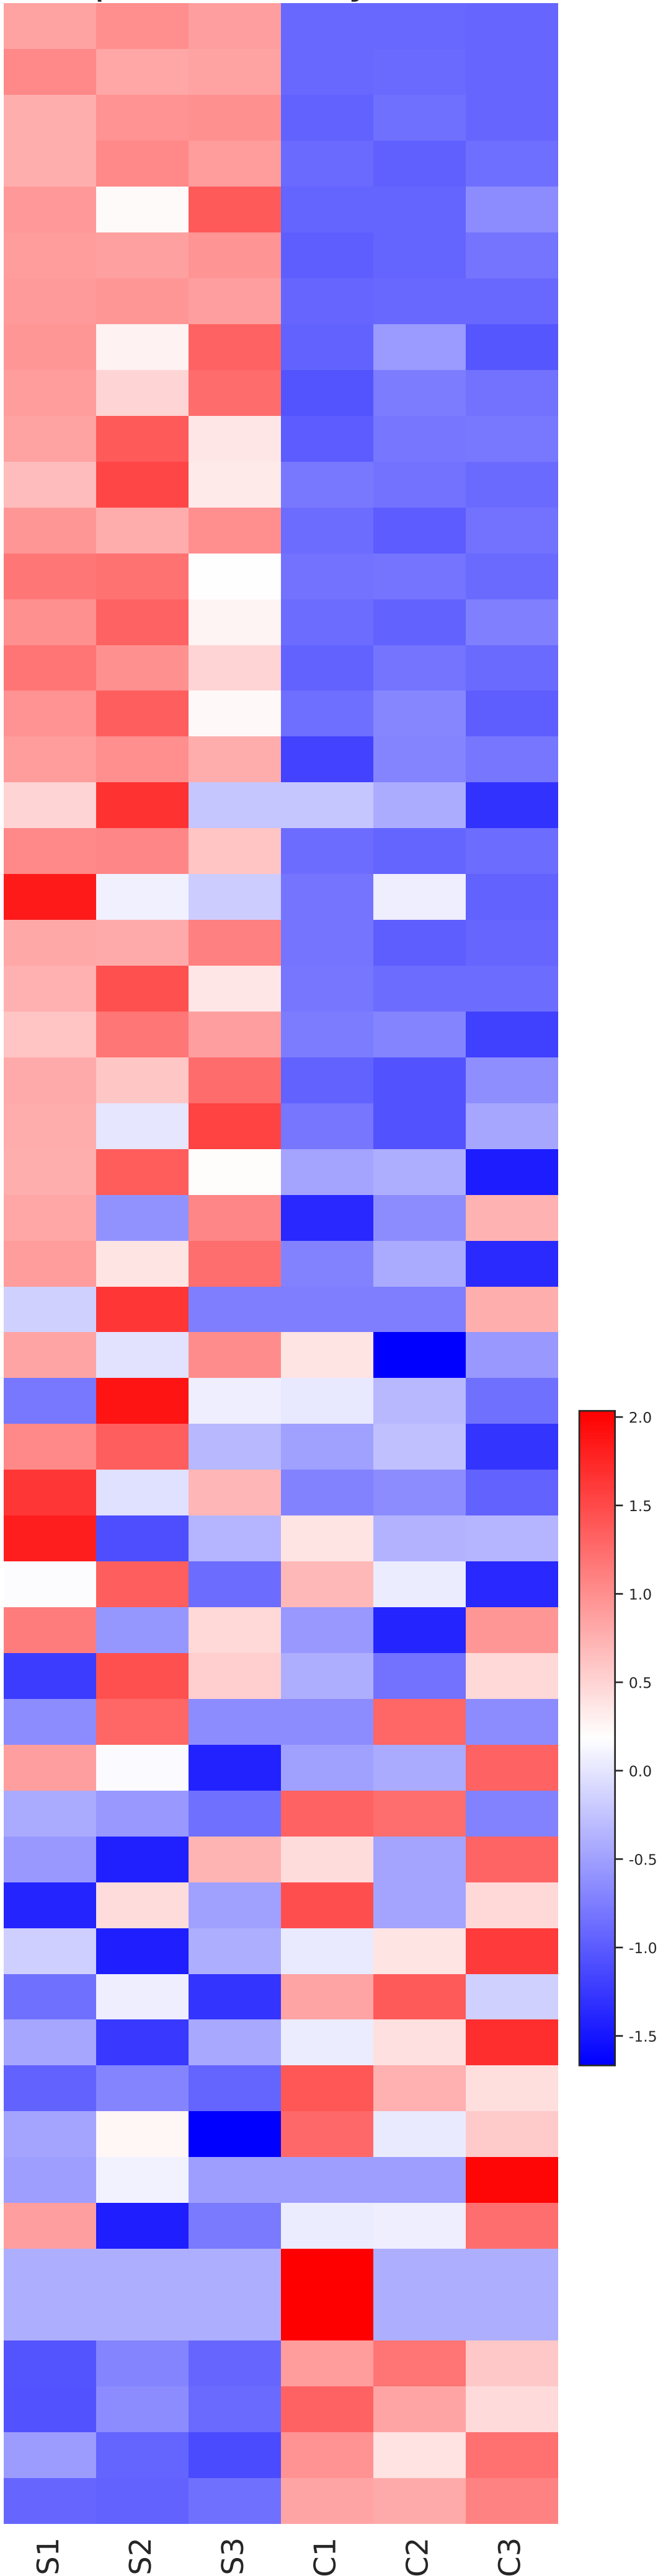

Supplement: Supplementary file 50 [file 8_cellular iron ion homeostasis(GO_0006879).heatmap.pdf › Source data/1.RNA-Seq source data/1.BMSCs/result/1.6.GSEA/S-vs-C/go/BP/8_cellular iron ion homeostasis(GO_0006879).heatmap.pdf]

# cell division(GO:0051301)

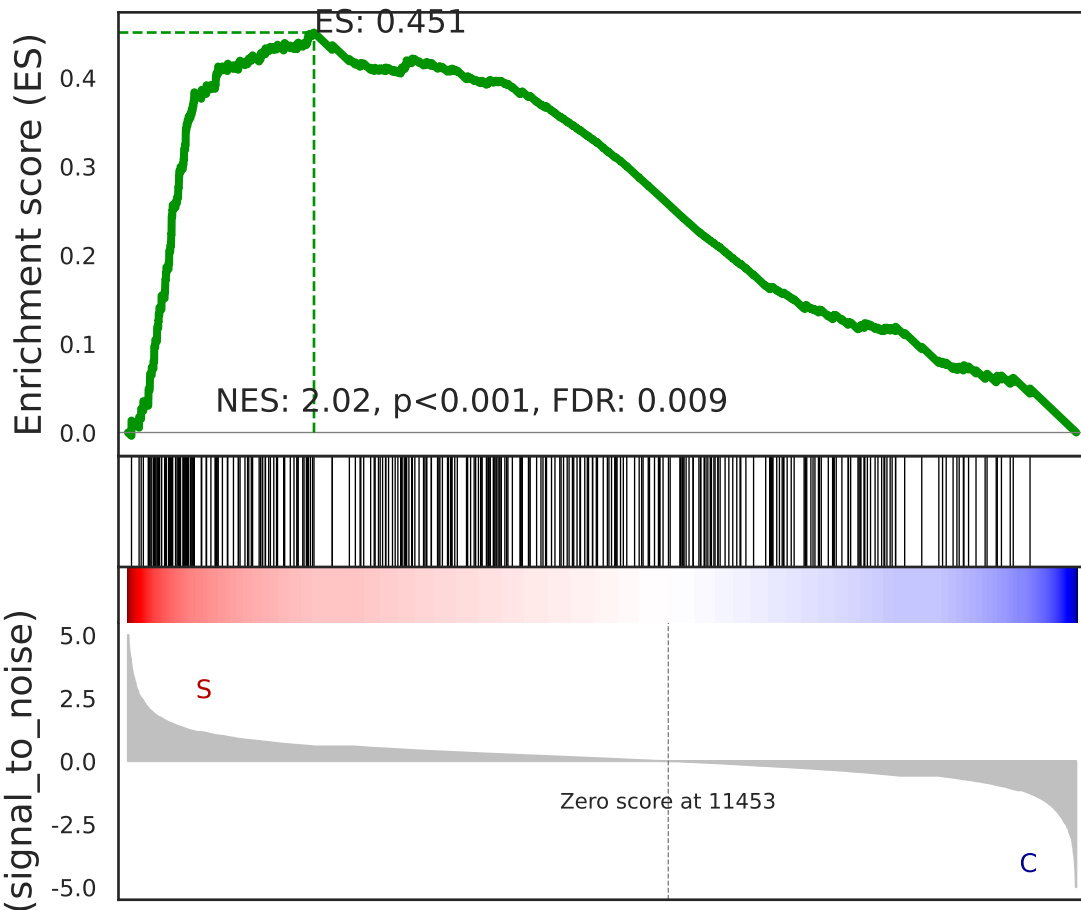

Supplement: Supplementary file 51 [file 9_cell division(GO_0051301).gsea.pdf › Source data/1.RNA-Seq source data/1.BMSCs/result/1.6.GSEA/S-vs-C/go/BP/9_cell division(GO_0051301).gsea.pdf]

cell division(GO:0051301)

Heatmap of the Analyzed GeneSet

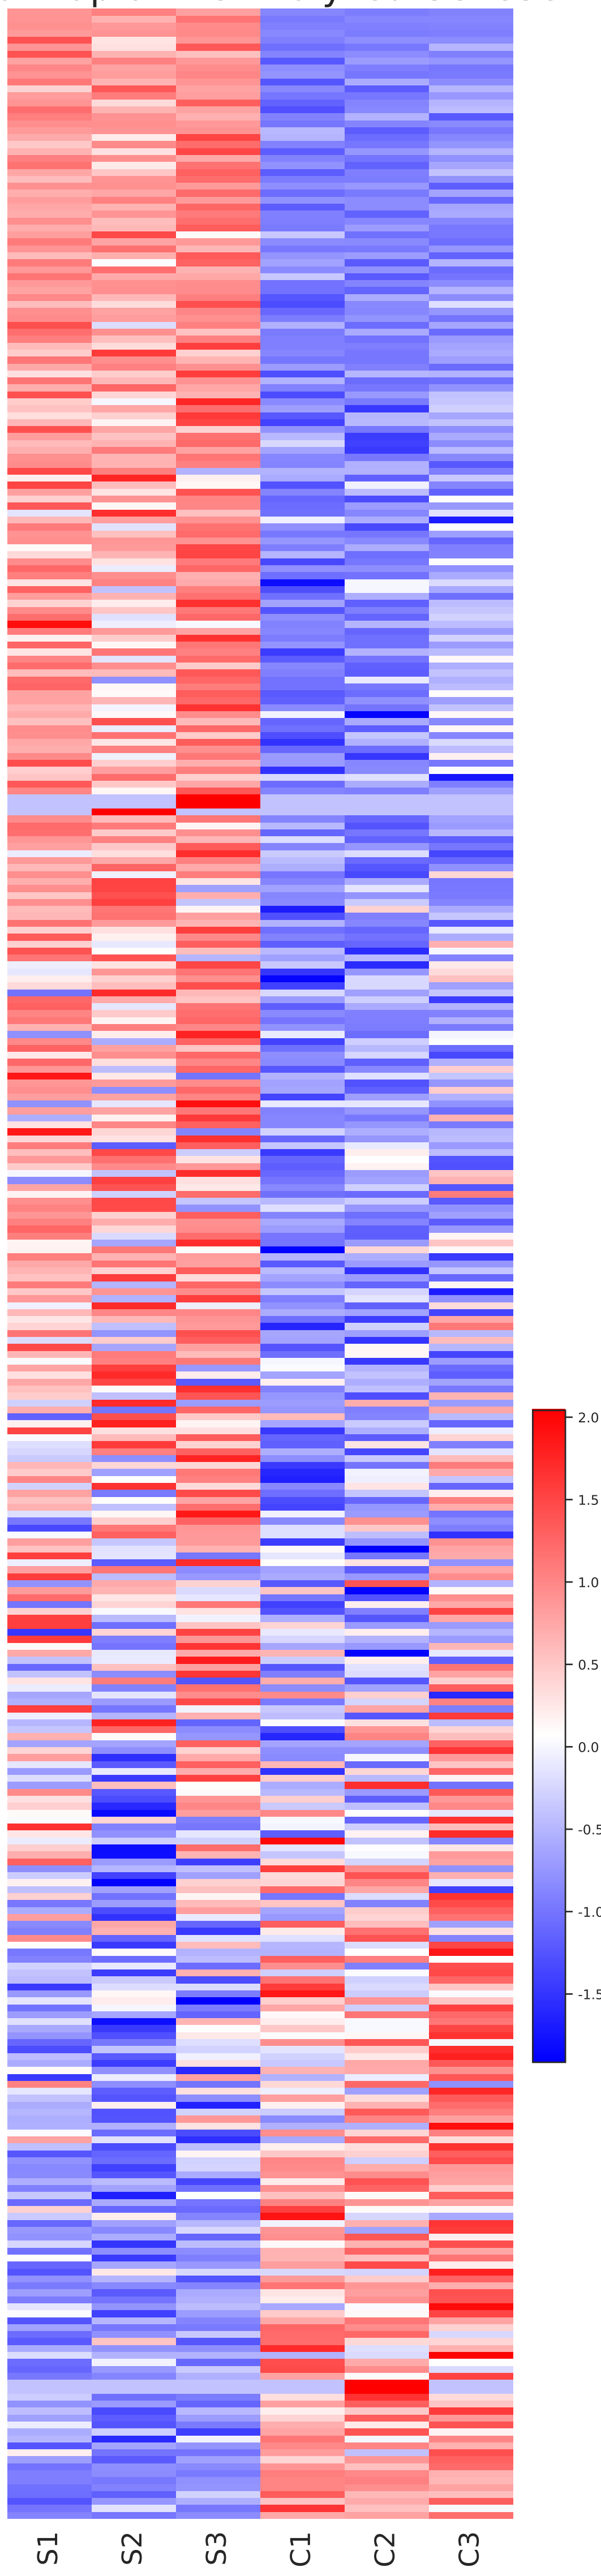

Supplement: Supplementary file 52 [file 9_cell division(GO_0051301).heatmap.pdf › Source data/1.RNA-Seq source data/1.BMSCs/result/1.6.GSEA/S-vs-C/go/BP/9_cell division(GO_0051301).heatmap.pdf]

# site of DNA damage(GO:0090734)

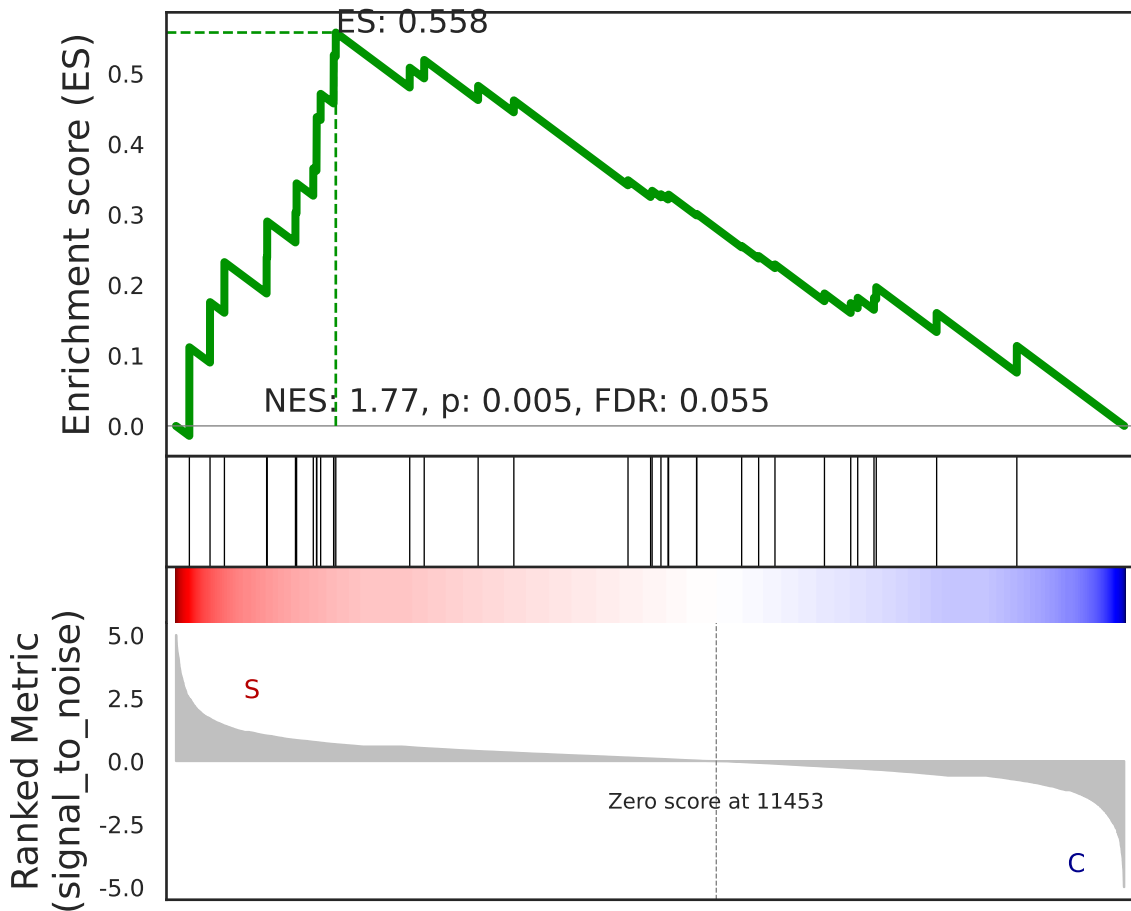

Supplement: Supplementary file 53 [file 10_site of DNA damage(GO_0090734).gsea.pdf › Source data/1.RNA-Seq source data/1.BMSCs/result/1.6.GSEA/S-vs-C/go/CC/10_site of DNA damage(GO_0090734).gsea.pdf]

site of DNA damage(GO:0090734)  
Heatmap of the Analyzed GeneSet

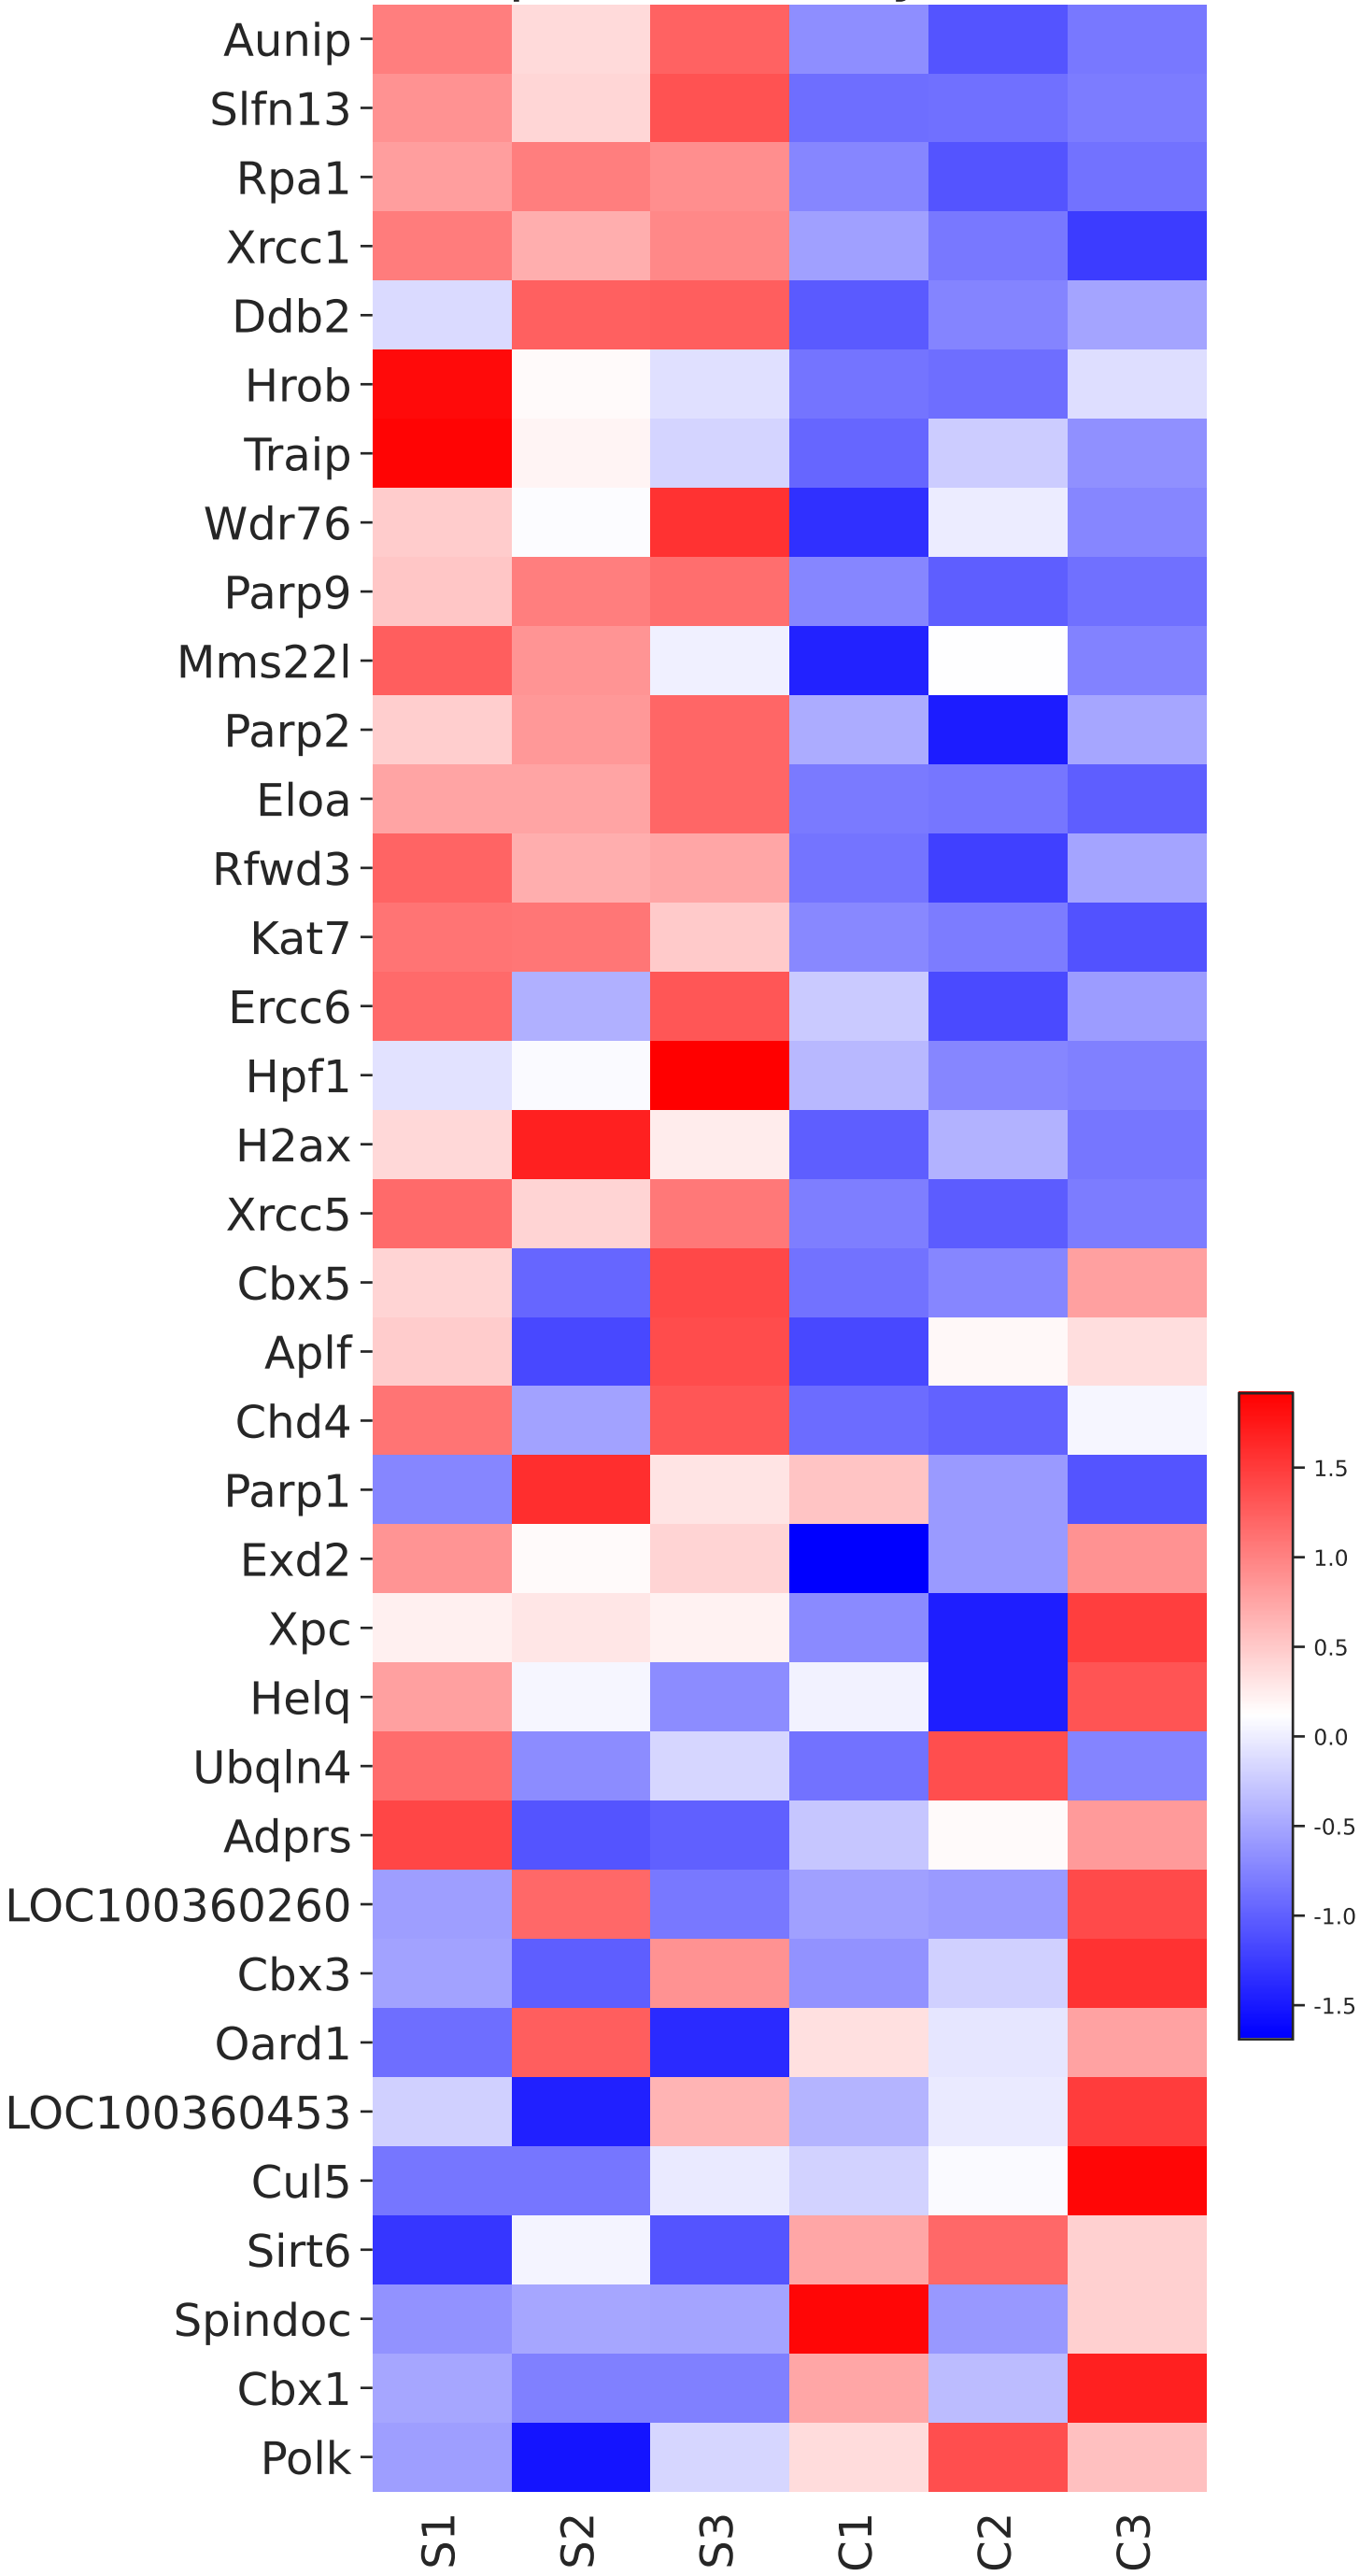

Supplement: Supplementary file 54 [file 10_site of DNA damage(GO_0090734).heatmap.pdf › Source data/1.RNA-Seq source data/1.BMSCs/result/1.6.GSEA/S-vs-C/go/CC/10_site of DNA damage(GO_0090734).heatmap.pdf]

# chromosome, centromeric region(GO:0000775)

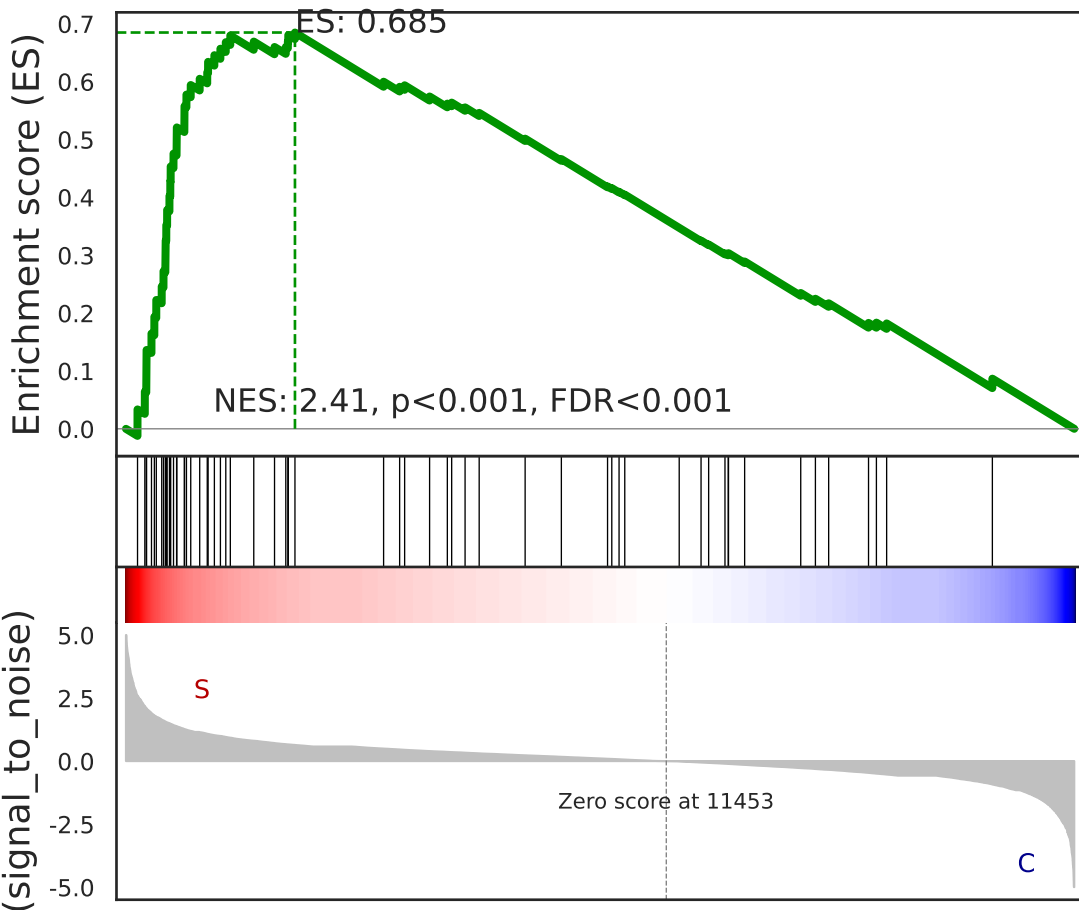

Supplement: Supplementary file 55 [file 1_chromosome, centromeric region(GO_0000775).gsea.pdf › Source data/1.RNA-Seq source data/1.BMSCs/result/1.6.GSEA/S-vs-C/go/CC/1_chromosome, centromeric region(GO_0000775).gsea.pdf]

chromosome, centromeric region(GO:0000775)  
Heatmap of the Analyzed GeneSet

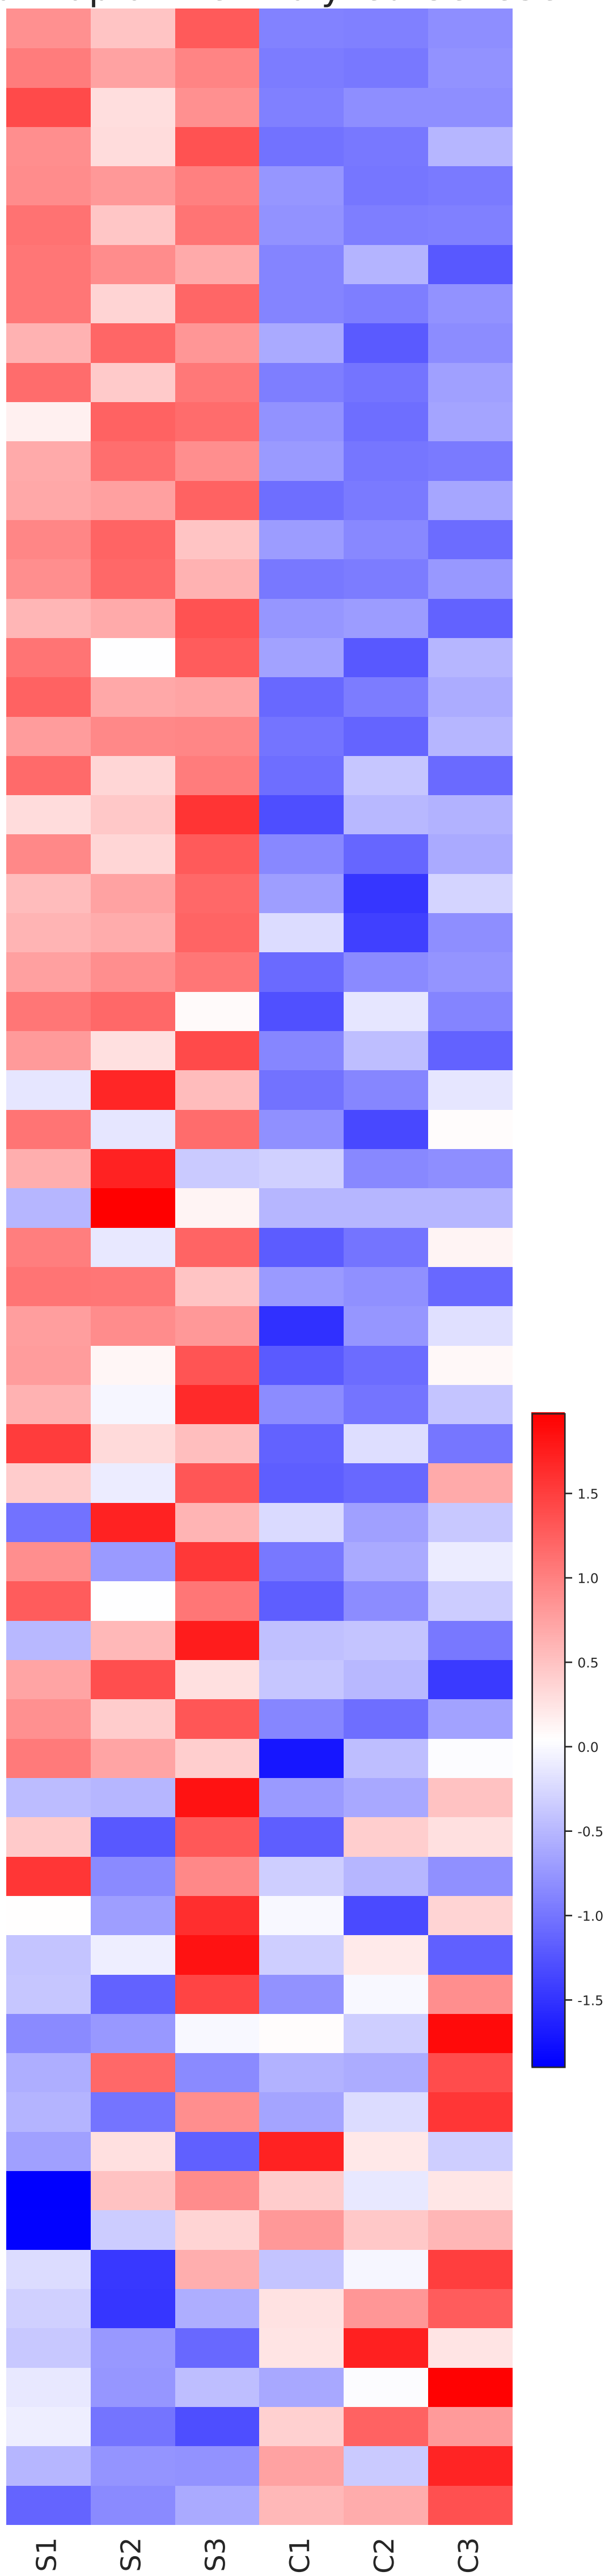

Supplement: Supplementary file 56 [file 1_chromosome, centromeric region(GO_0000775).heatmap.pdf › Source data/1.RNA-Seq source data/1.BMSCs/result/1.6.GSEA/S-vs-C/go/CC/1_chromosome, centromeric region(GO_0000775).heatmap.pdf]

# autolysosome(GO:0044754)

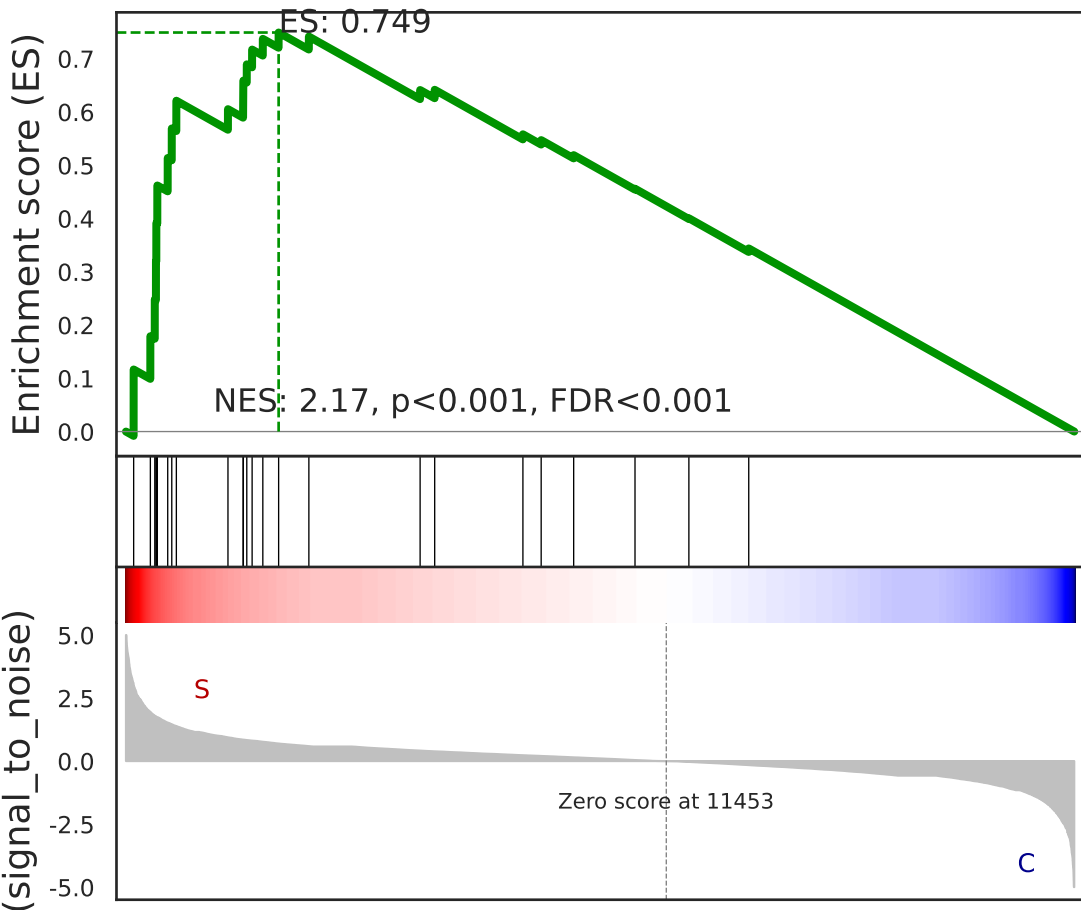

Supplement: Supplementary file 57 [file 2_autolysosome(GO_0044754).gsea.pdf › Source data/1.RNA-Seq source data/1.BMSCs/result/1.6.GSEA/S-vs-C/go/CC/2_autolysosome(GO_0044754).gsea.pdf]

# autolysosome(GO:0044754)

## Heatmap of the Analyzed GeneSet

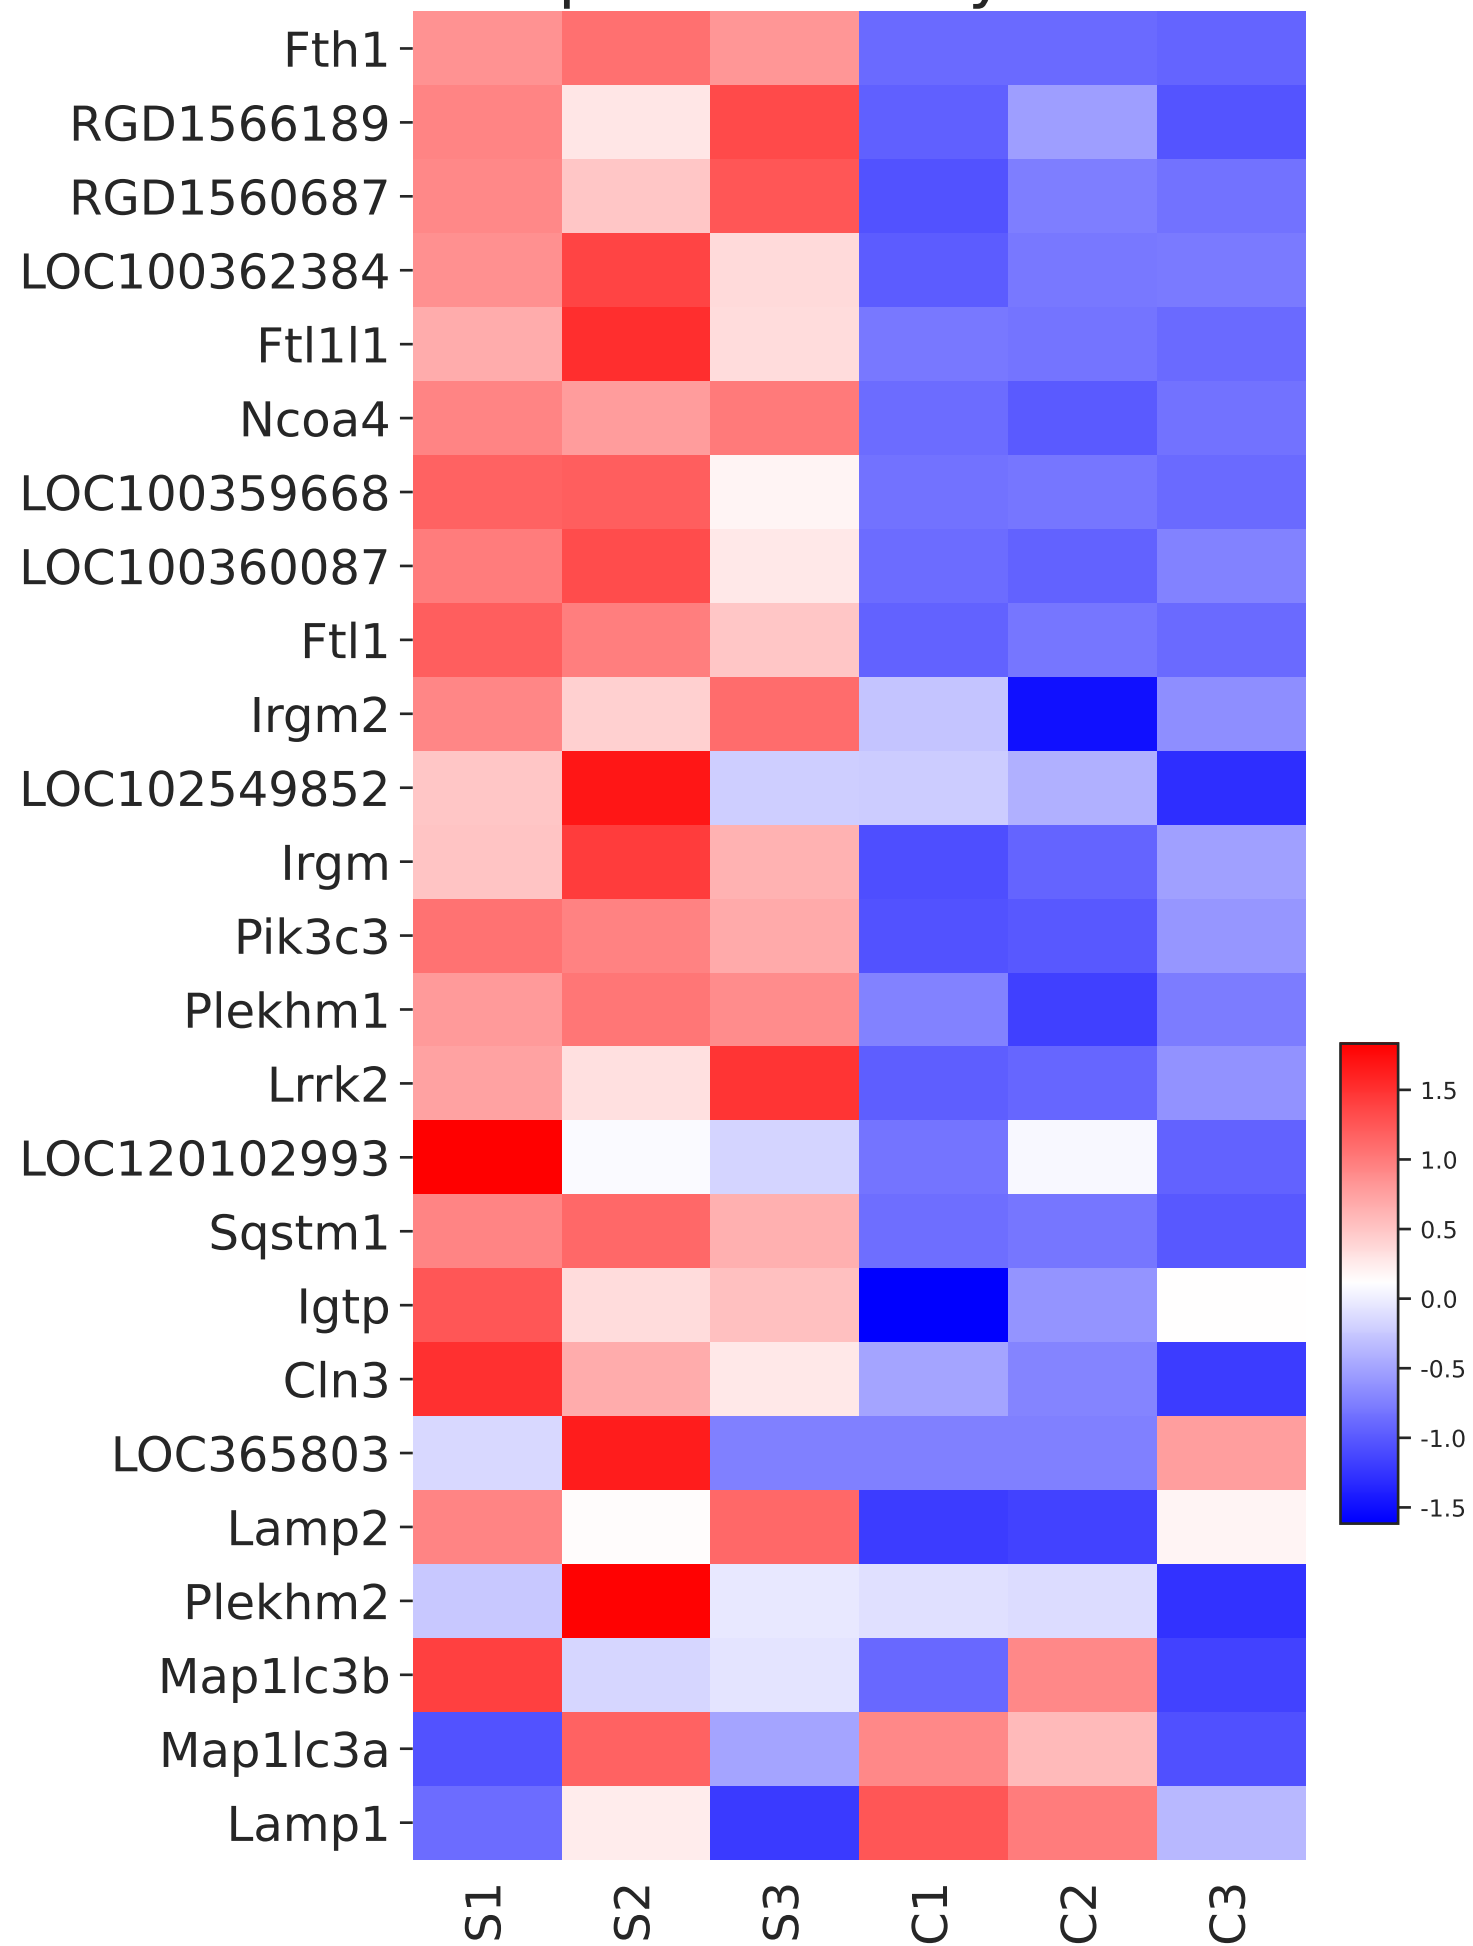

Supplement: Supplementary file 58 [file 2_autolysosome(GO_0044754).heatmap.pdf › Source data/1.RNA-Seq source data/1.BMSCs/result/1.6.GSEA/S-vs-C/go/CC/2_autolysosome(GO_0044754).heatmap.pdf]

# external side of plasma membrane(GO:0009897)

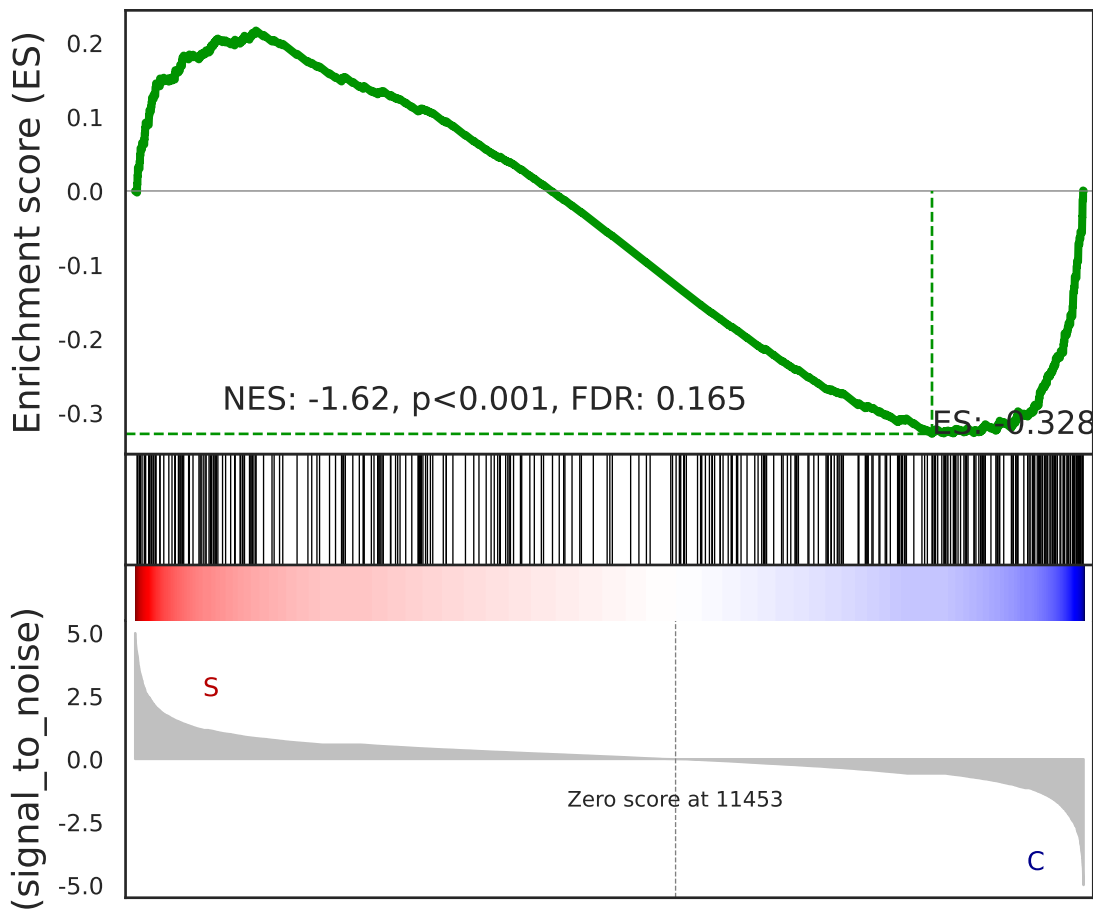

Supplement: Supplementary file 59 [file 389_external side of plasma membrane(GO_0009897).gsea.pdf › Source data/1.RNA-Seq source data/1.BMSCs/result/1.6.GSEA/S-vs-C/go/CC/389_external side of plasma membrane(GO_0009897).gsea.pdf]

external side of plasma membrane(GO:0009897)

Heatmap of the Analyzed GeneSet

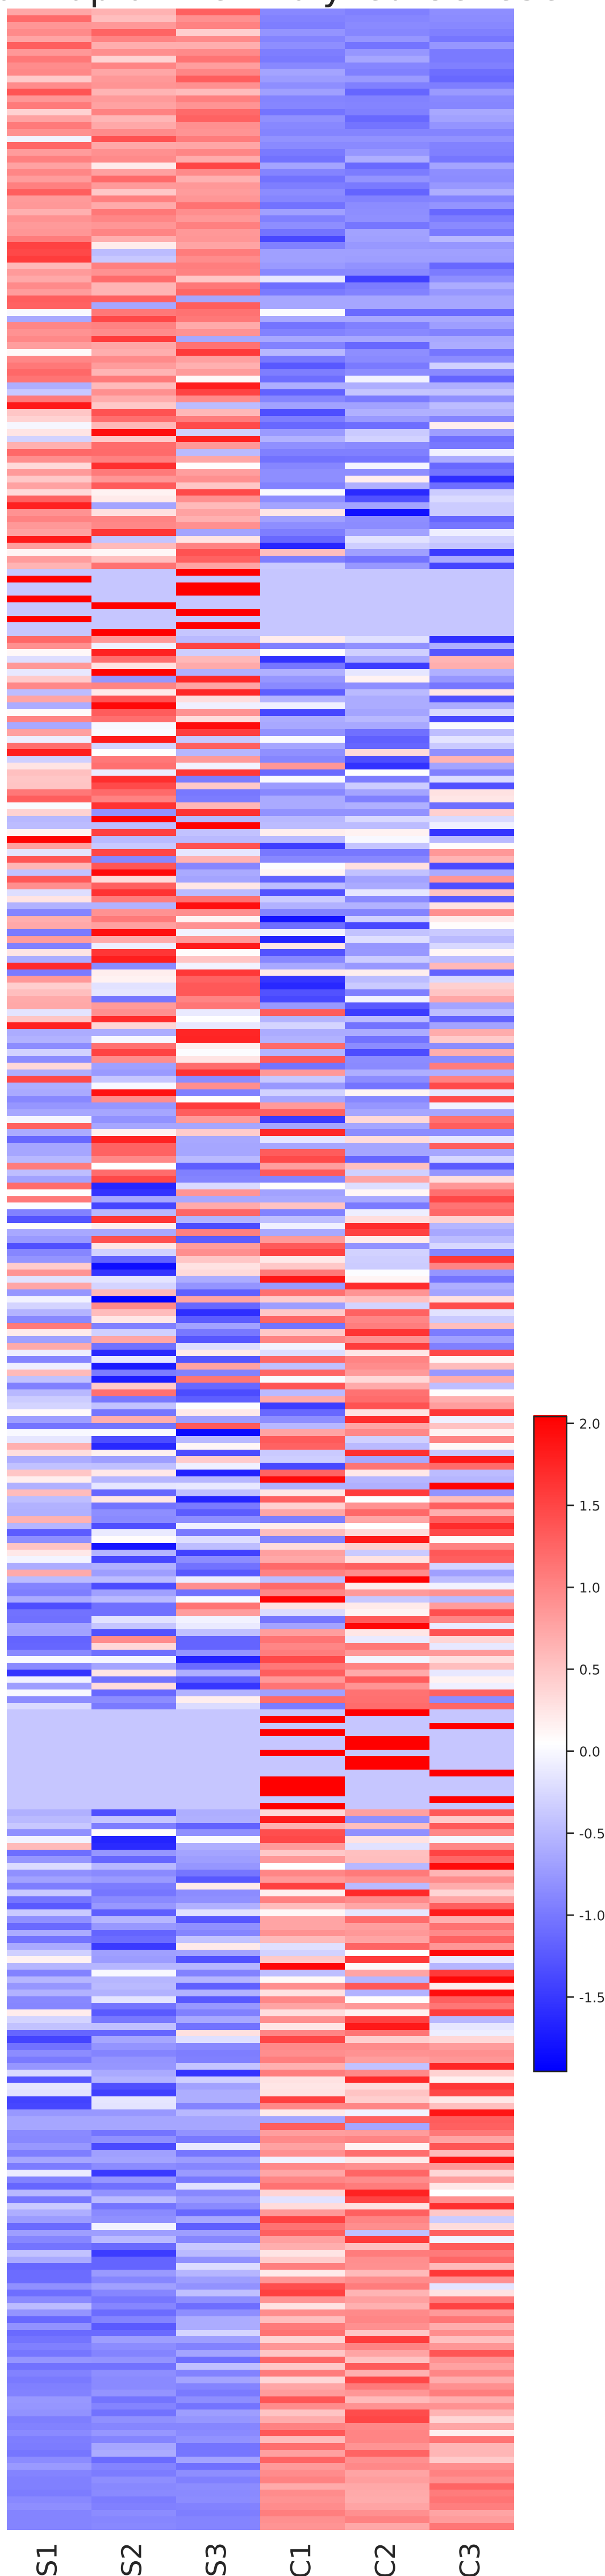

Supplement: Supplementary file 60 [file 389_external side of plasma membrane(GO_0009897).heatmap.pdf › Source data/1.RNA-Seq source data/1.BMSCs/result/1.6.GSEA/S-vs-C/go/CC/389_external side of plasma membrane(GO_0009897).heatmap.pdf]

# basement membrane(GO:0005604)

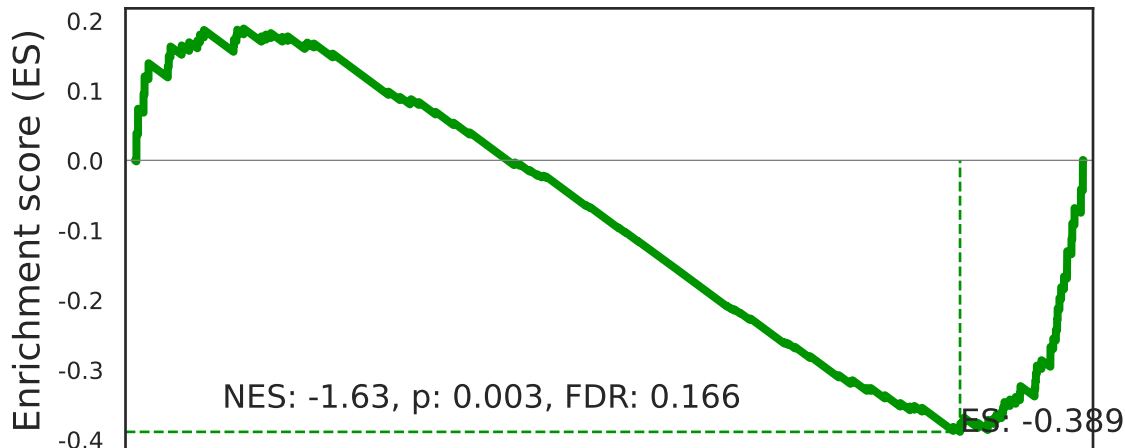

Ranked Metric  
(signal\_to\_noise)

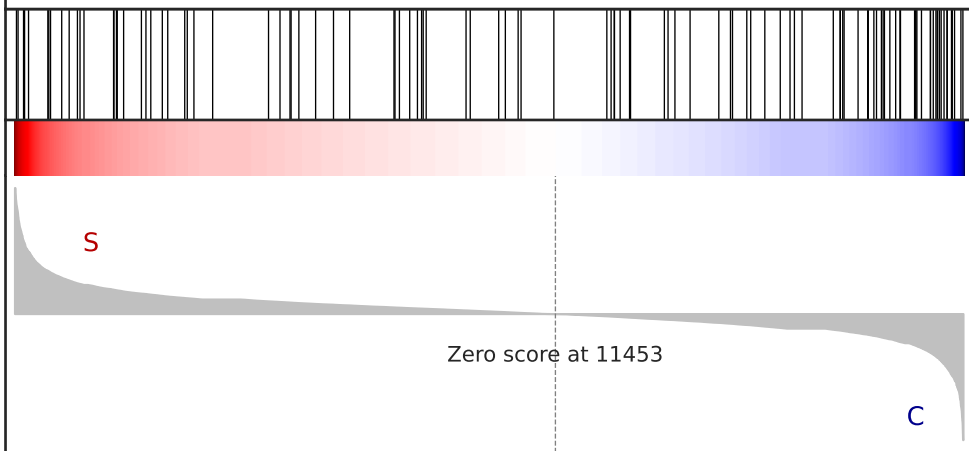

Supplement: Supplementary file 61 [file 390_basement membrane(GO_0005604).gsea.pdf › Source data/1.RNA-Seq source data/1.BMSCs/result/1.6.GSEA/S-vs-C/go/CC/390_basement membrane(GO_0005604).gsea.pdf]

basement membrane(GO:0005604)  
Heatmap of the Analyzed GeneSet

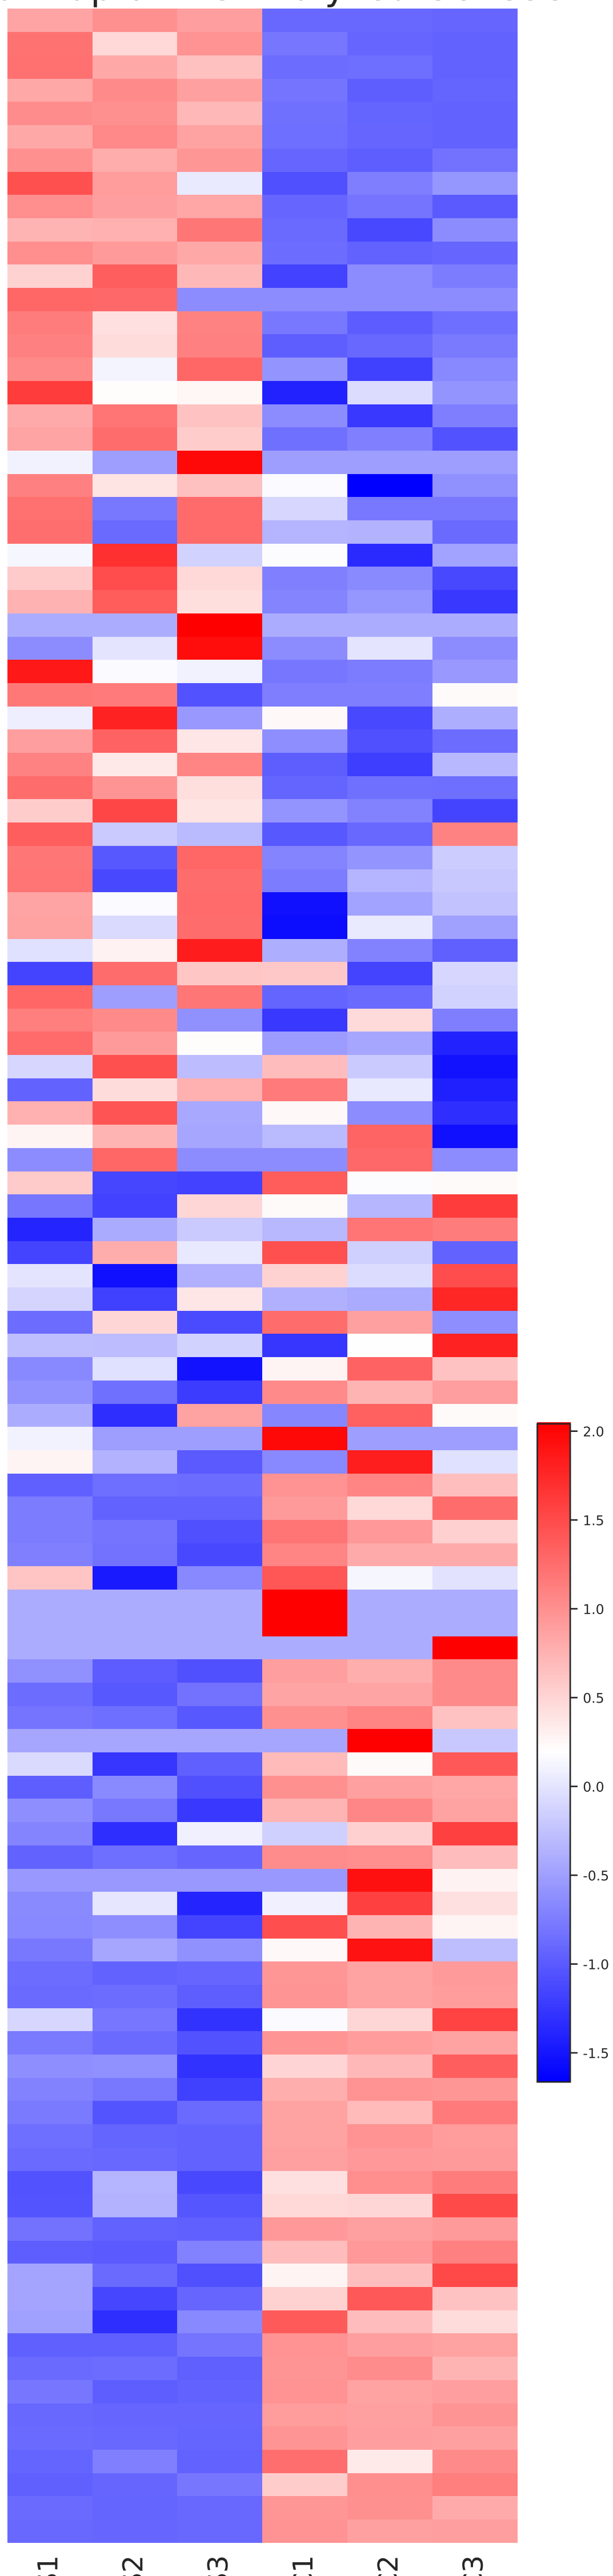

Supplement: Supplementary file 62 [file 390_basement membrane(GO_0005604).heatmap.pdf › Source data/1.RNA-Seq source data/1.BMSCs/result/1.6.GSEA/S-vs-C/go/CC/390_basement membrane(GO_0005604).heatmap.pdf]

# plasma membrane raft(GO:0044853)

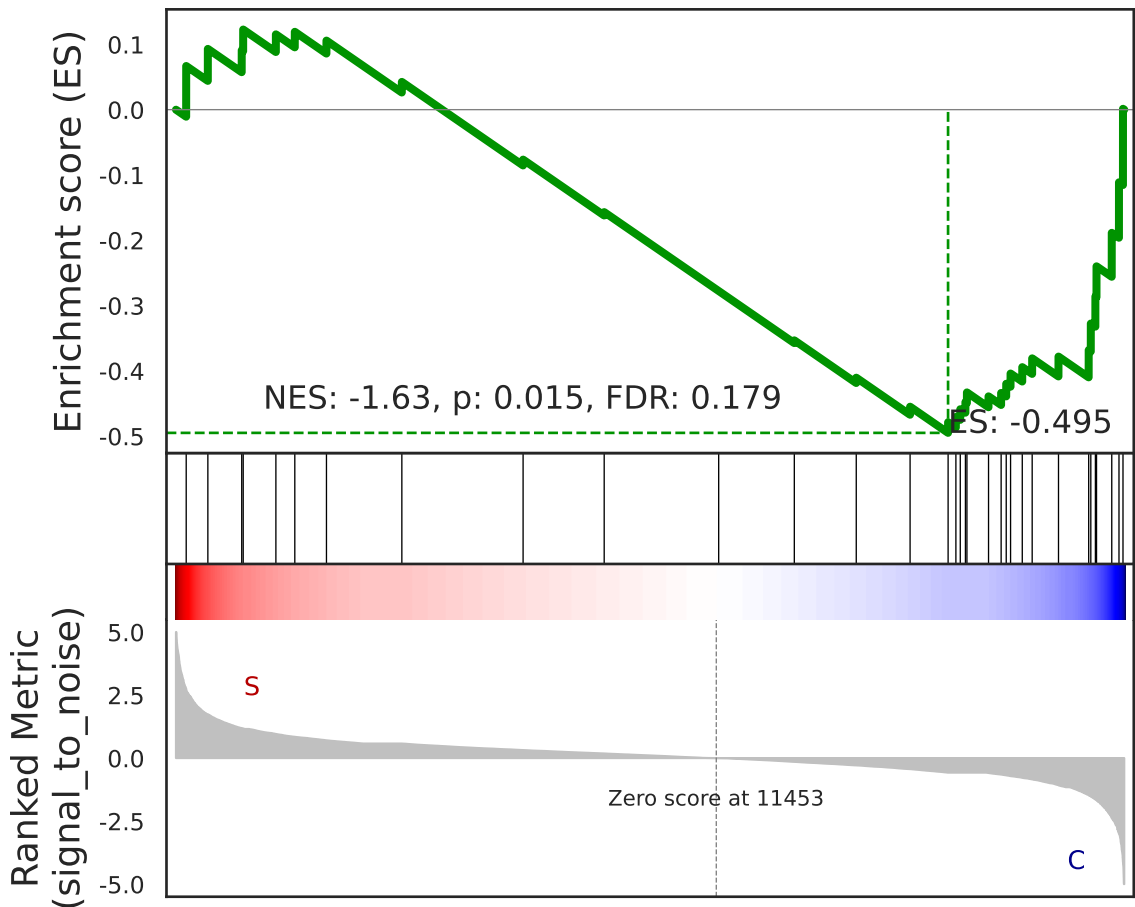

Supplement: Supplementary file 63 [file 391_plasma membrane raft(GO_0044853).gsea.pdf › Source data/1.RNA-Seq source data/1.BMSCs/result/1.6.GSEA/S-vs-C/go/CC/391_plasma membrane raft(GO_0044853).gsea.pdf]

plasma membrane raft(GO:0044853)  
Heatmap of the Analyzed GeneSet

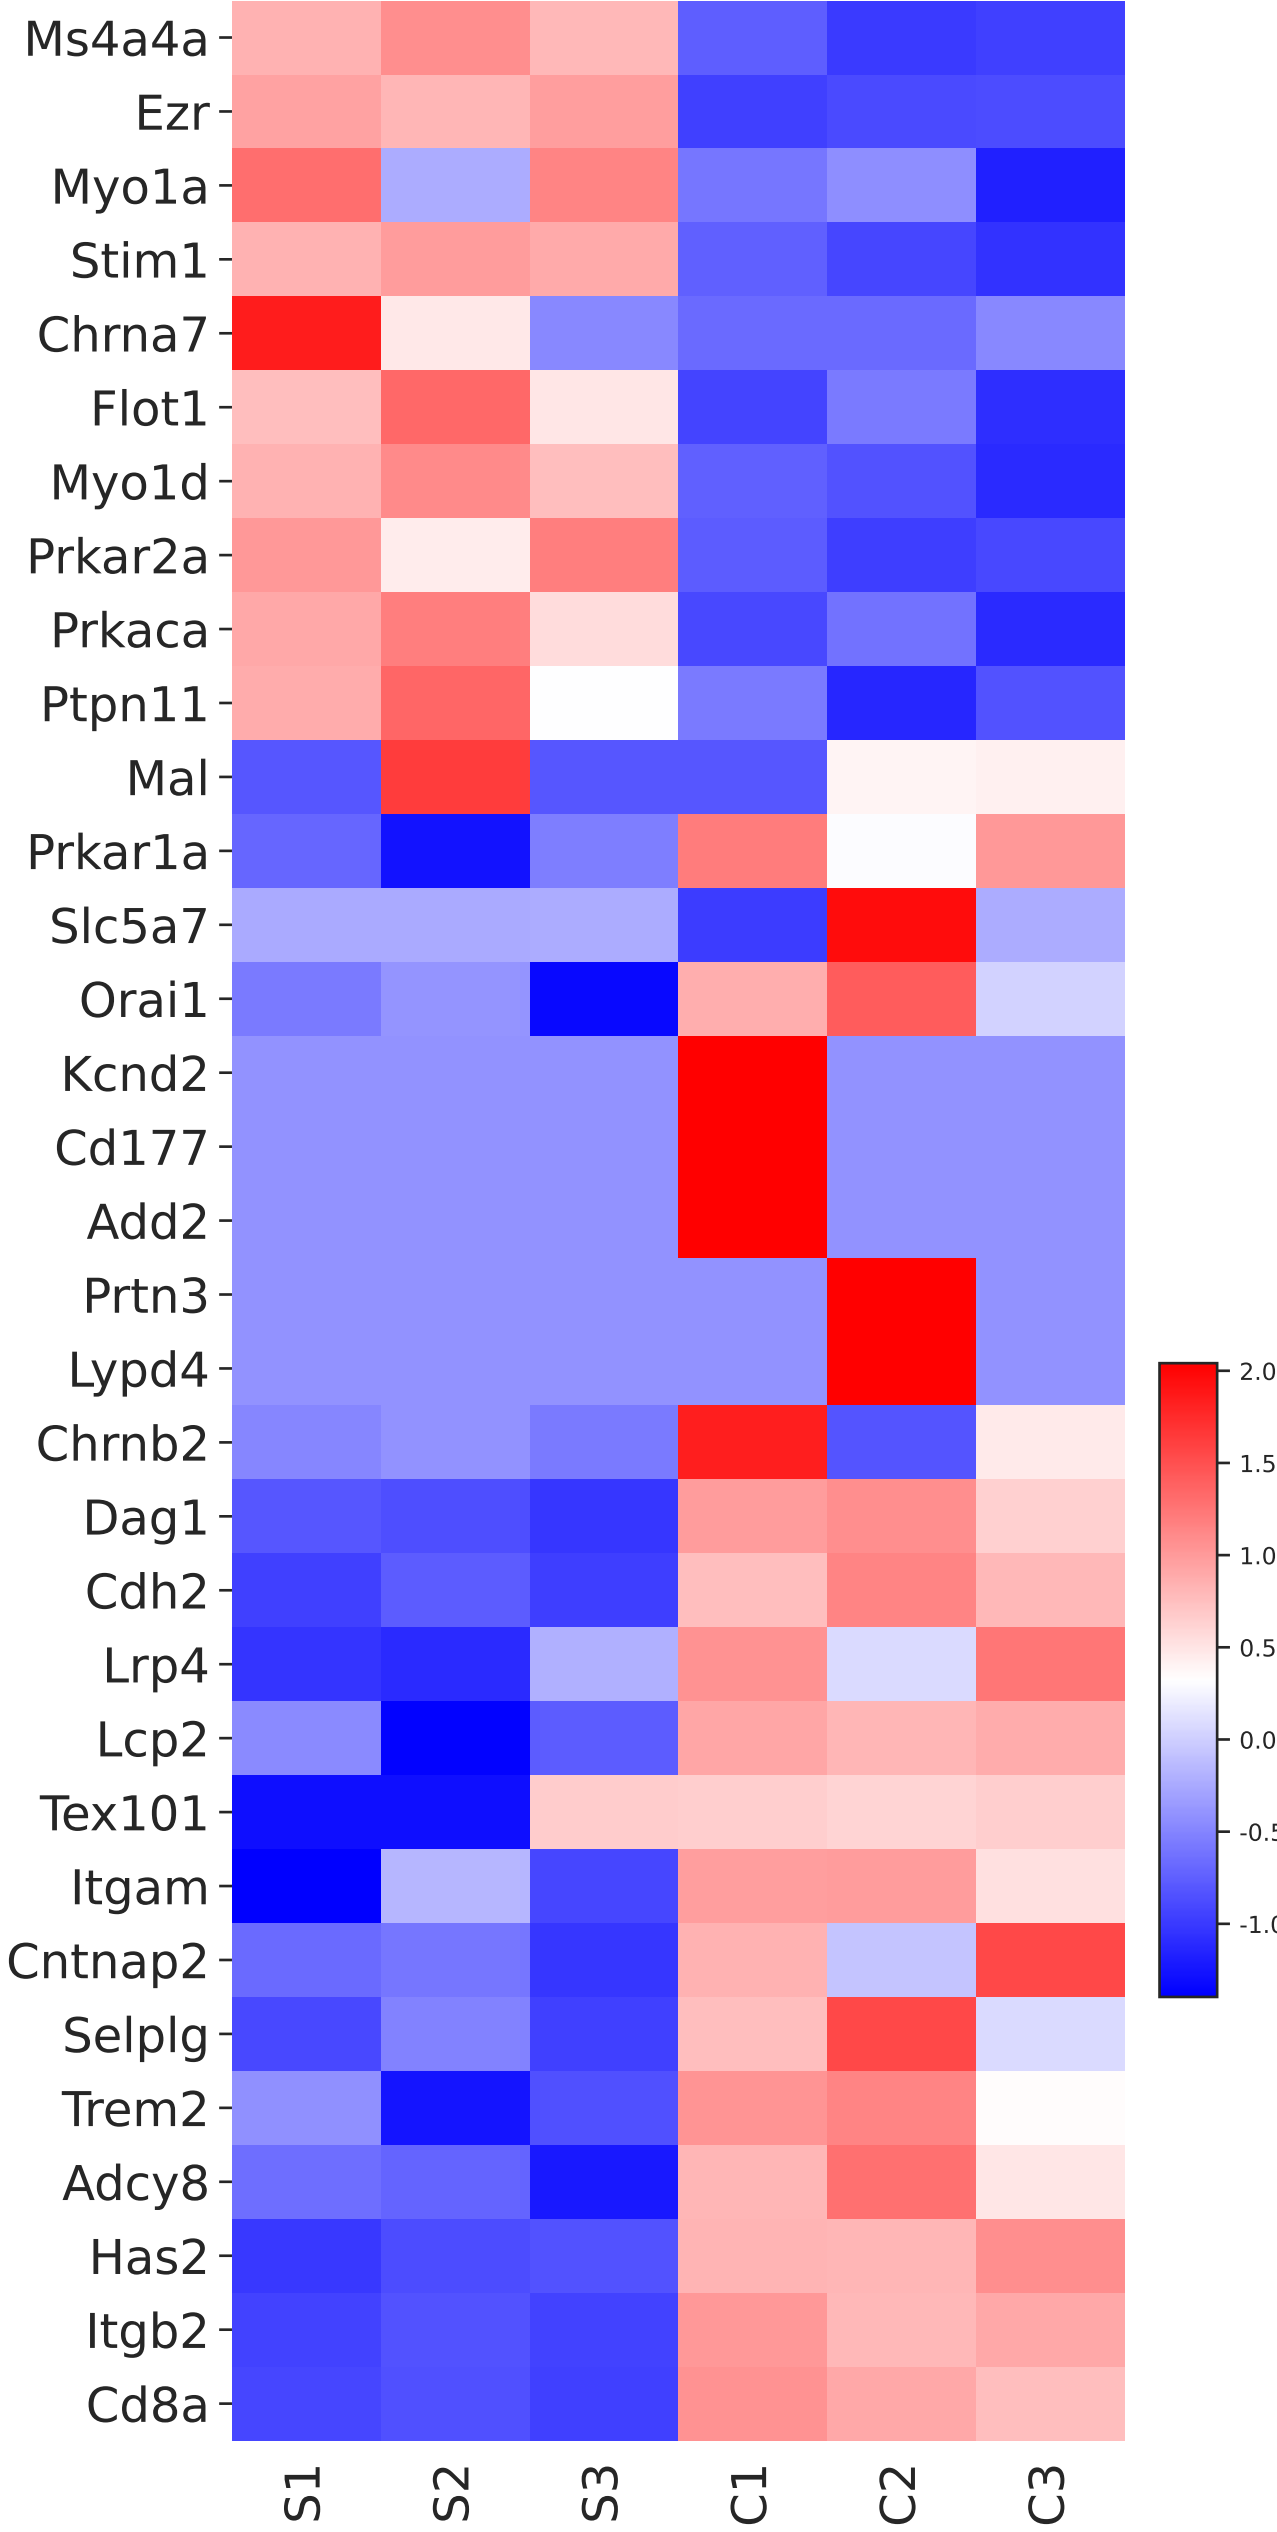

Supplement: Supplementary file 64 [file 391_plasma membrane raft(GO_0044853).heatmap.pdf › Source data/1.RNA-Seq source data/1.BMSCs/result/1.6.GSEA/S-vs-C/go/CC/391_plasma membrane raft(GO_0044853).heatmap.pdf]

# actin filament(GO:0005884)

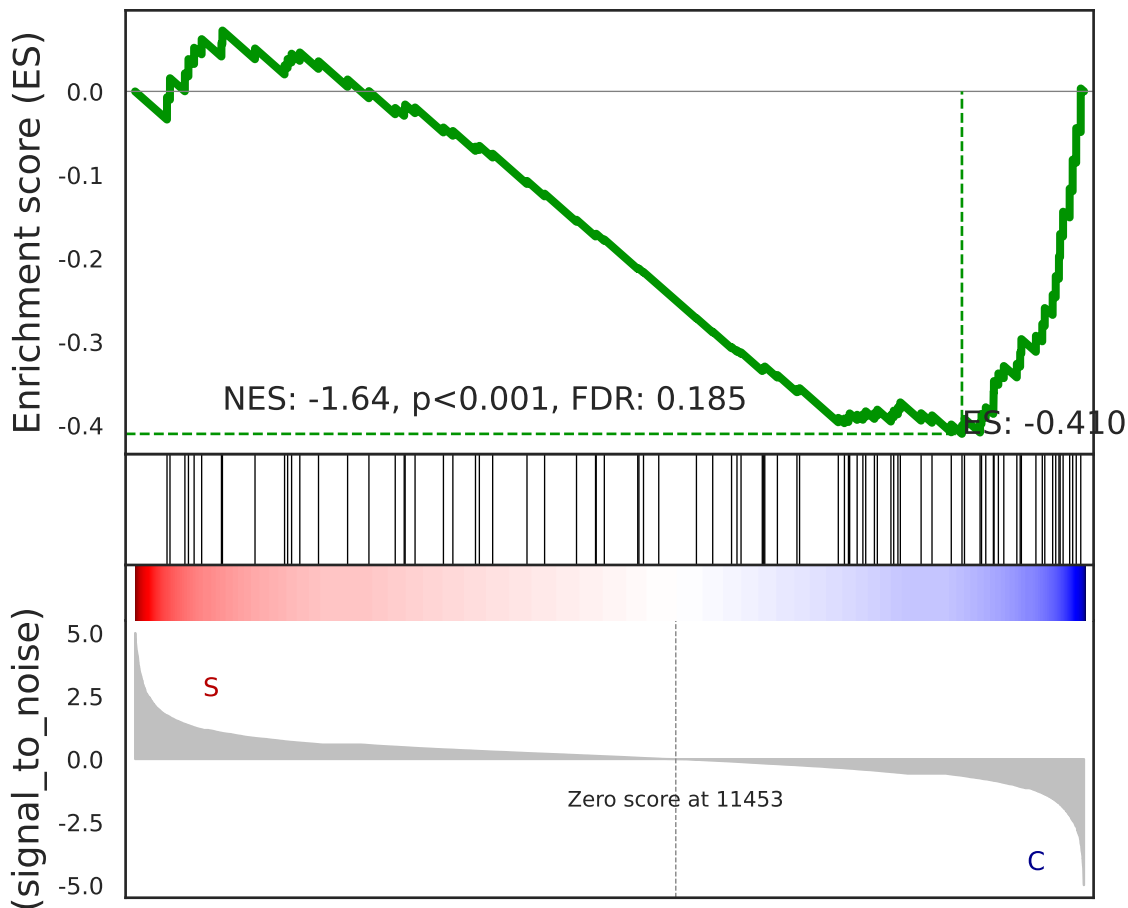

Supplement: Supplementary file 65 [file 392_actin filament(GO_0005884).gsea.pdf › Source data/1.RNA-Seq source data/1.BMSCs/result/1.6.GSEA/S-vs-C/go/CC/392_actin filament(GO_0005884).gsea.pdf]

actin filament(GO:0005884)

Heatmap of the Analyzed GeneSet

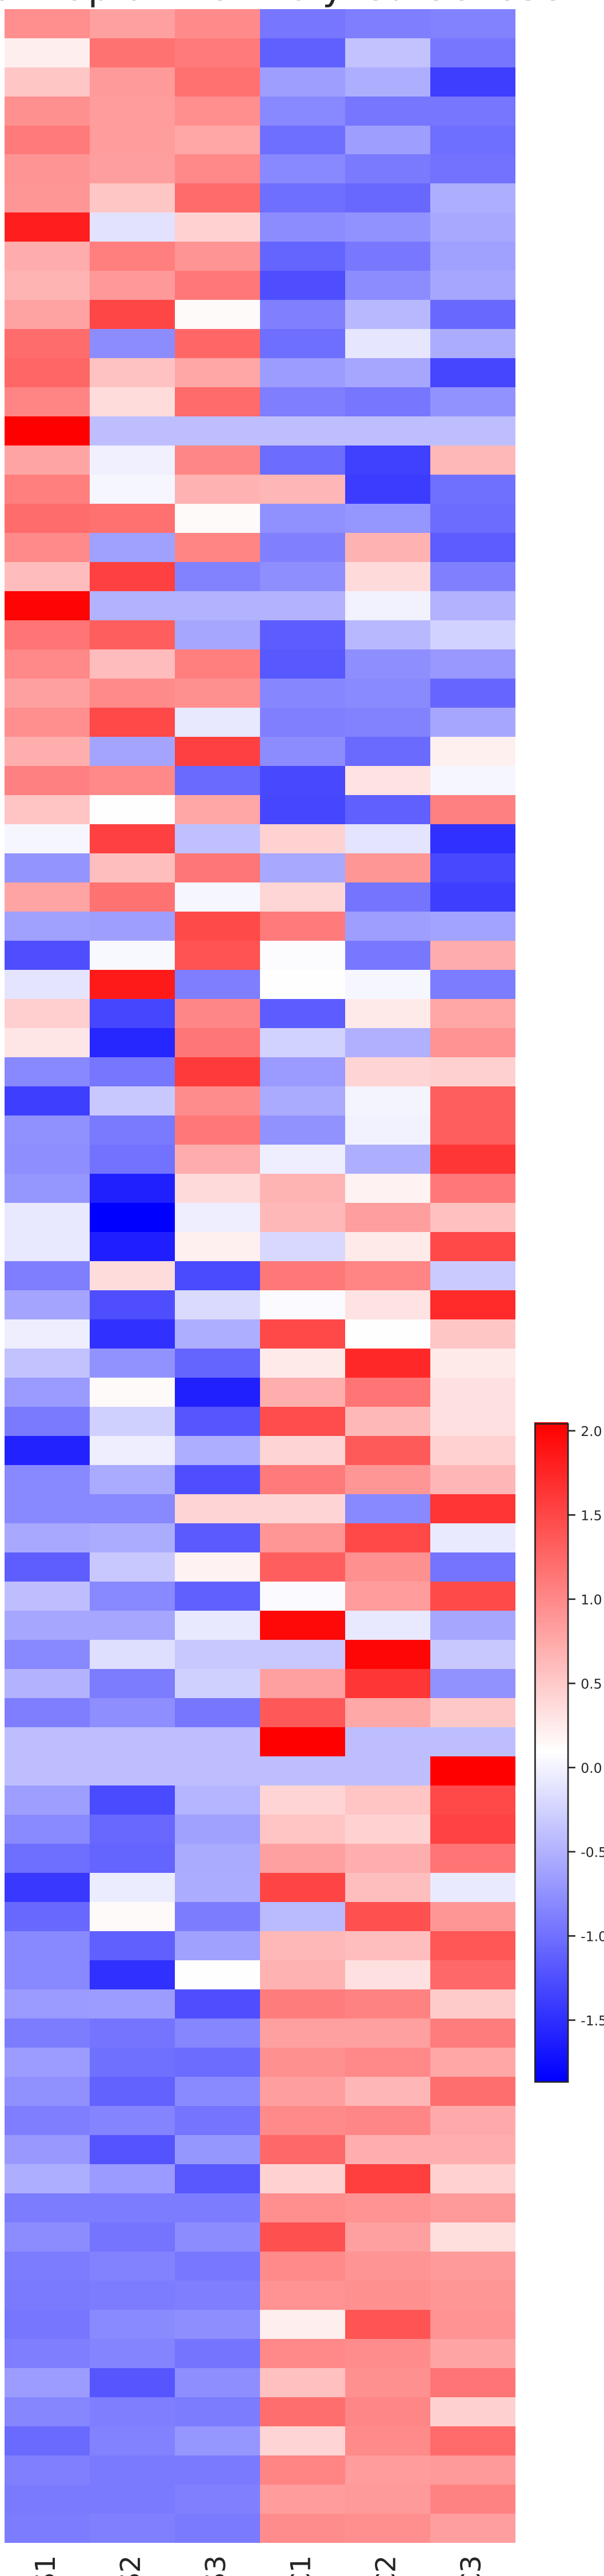

Supplement: Supplementary file 66 [file 392_actin filament(GO_0005884).heatmap.pdf › Source data/1.RNA-Seq source data/1.BMSCs/result/1.6.GSEA/S-vs-C/go/CC/392_actin filament(GO_0005884).heatmap.pdf]

# dense core granule(GO:0031045)

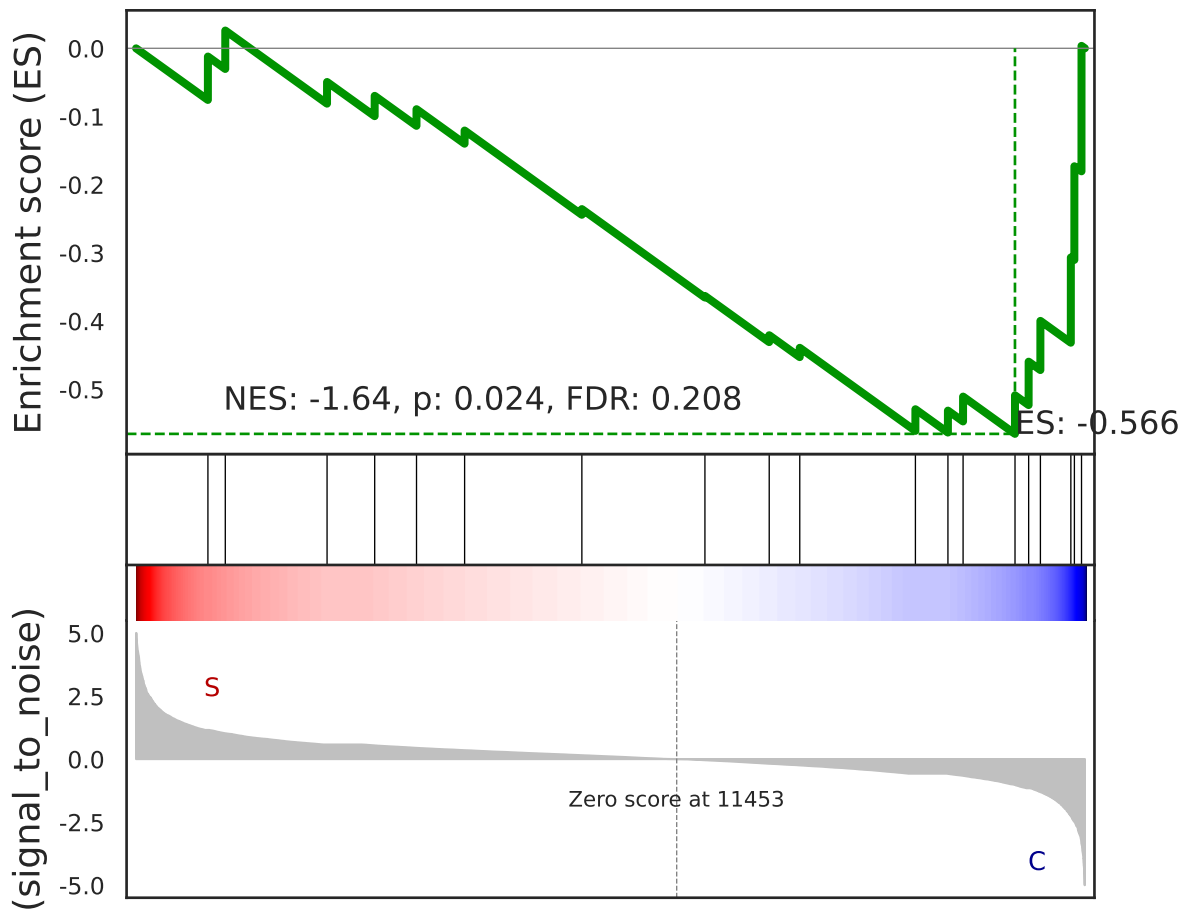

Supplement: Supplementary file 67 [file 393_dense core granule(GO_0031045).gsea.pdf › Source data/1.RNA-Seq source data/1.BMSCs/result/1.6.GSEA/S-vs-C/go/CC/393_dense core granule(GO_0031045).gsea.pdf]

# dense core granule(GO:0031045)

## Heatmap of the Analyzed GeneSet

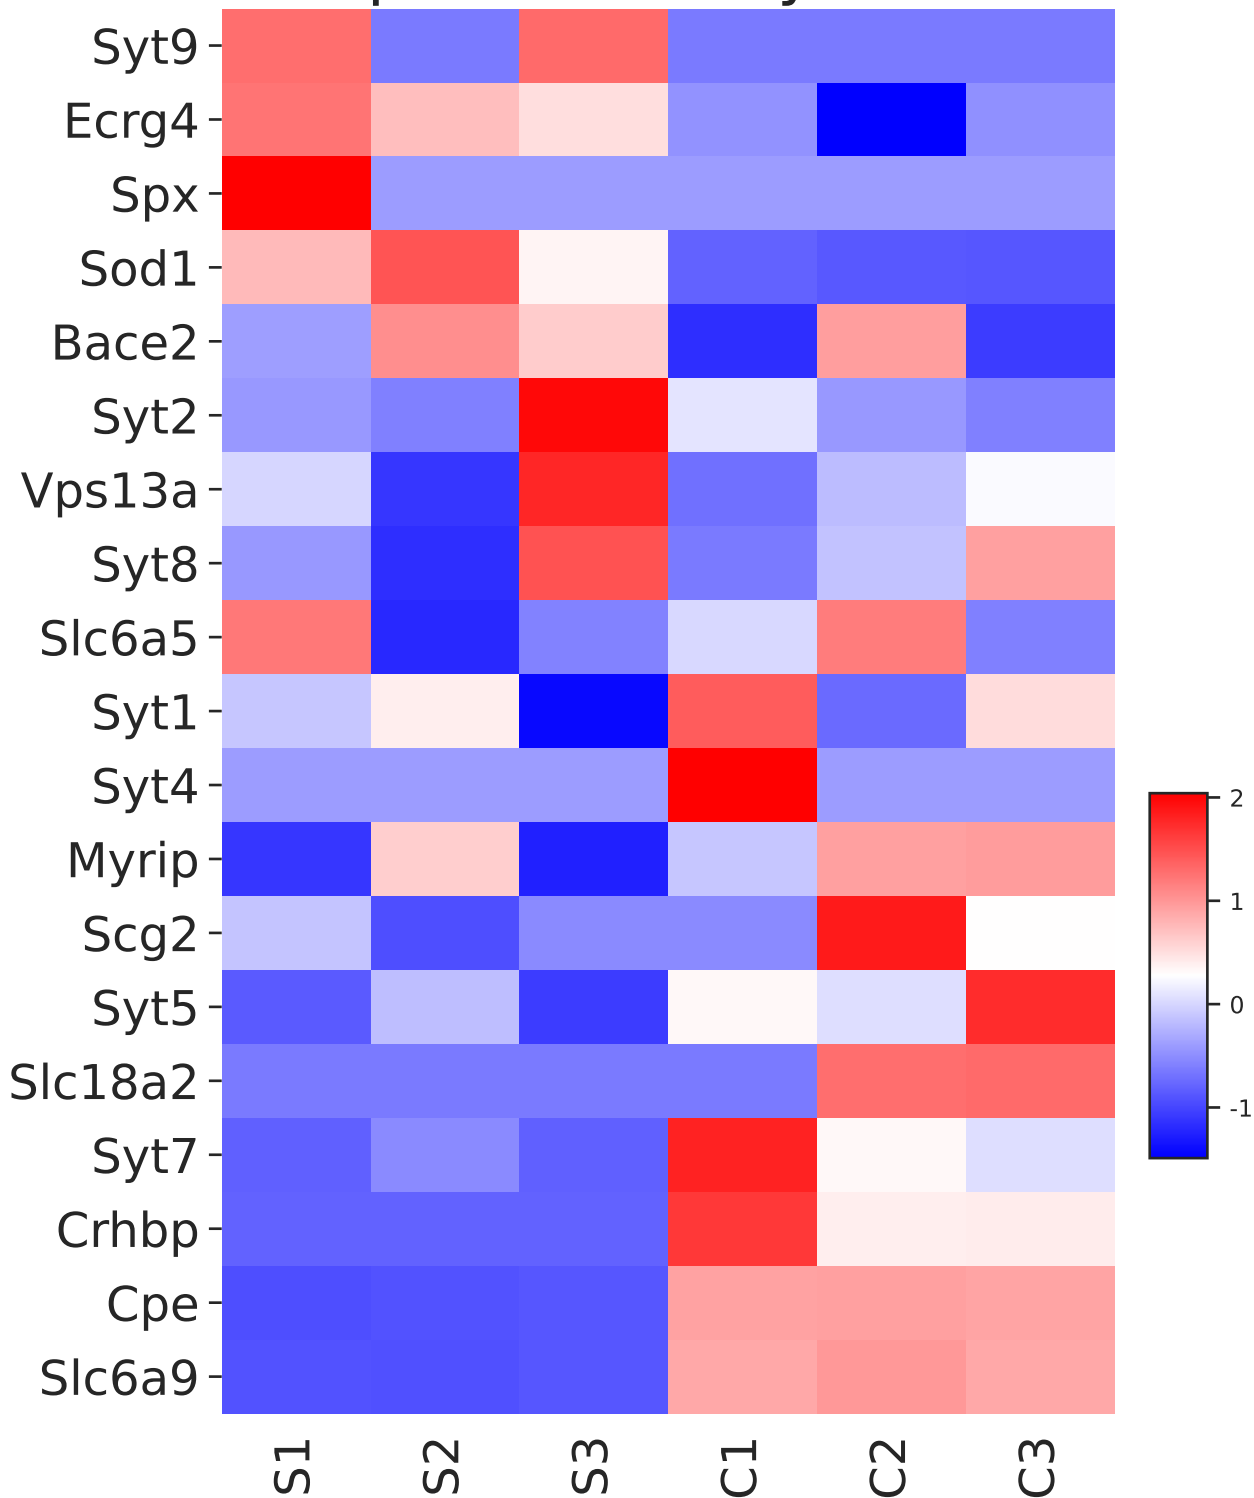

Supplement: Supplementary file 68 [file 393_dense core granule(GO_0031045).heatmap.pdf › Source data/1.RNA-Seq source data/1.BMSCs/result/1.6.GSEA/S-vs-C/go/CC/393_dense core granule(GO_0031045).heatmap.pdf]

# myosin II complex(GO:0016460)

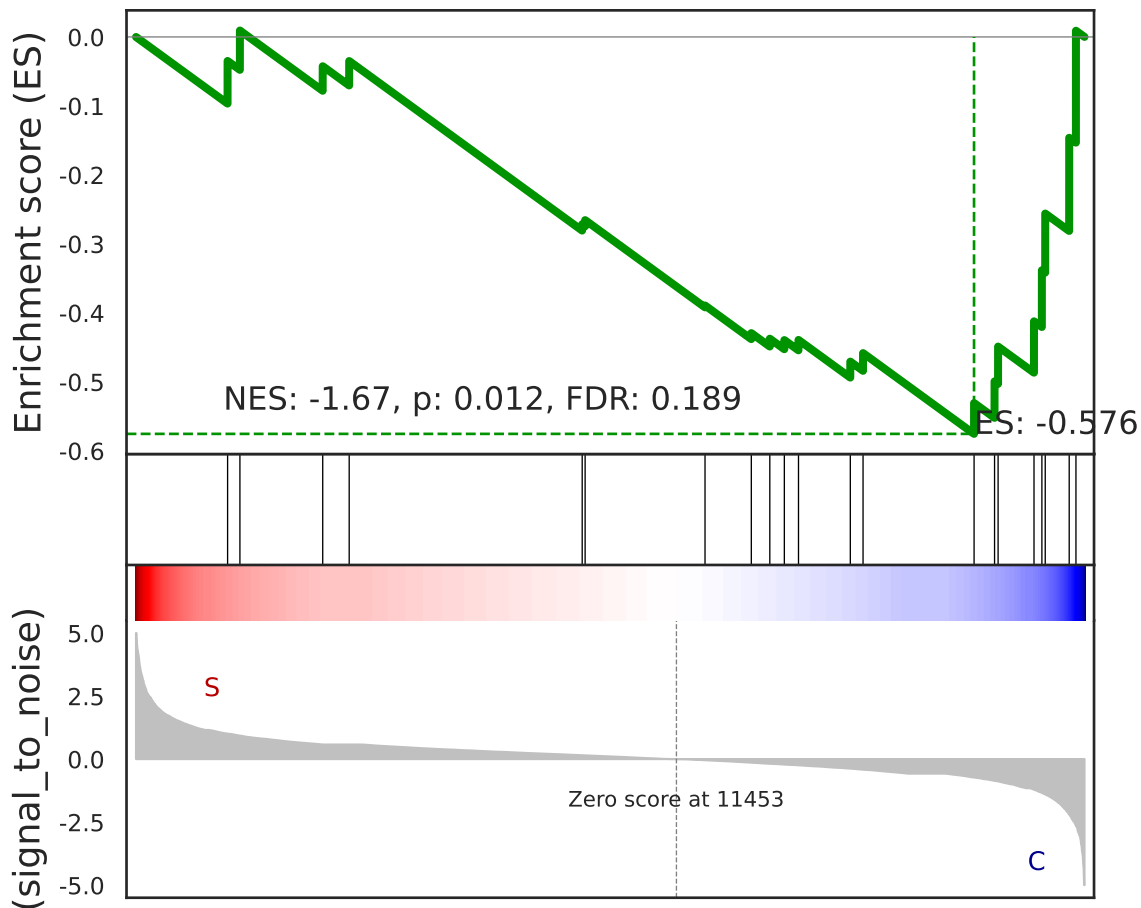

Supplement: Supplementary file 69 [file 394_myosin II complex(GO_0016460).gsea.pdf › Source data/1.RNA-Seq source data/1.BMSCs/result/1.6.GSEA/S-vs-C/go/CC/394_myosin II complex(GO_0016460).gsea.pdf]

# myosin II complex(GO:0016460)

## Heatmap of the Analyzed GeneSet

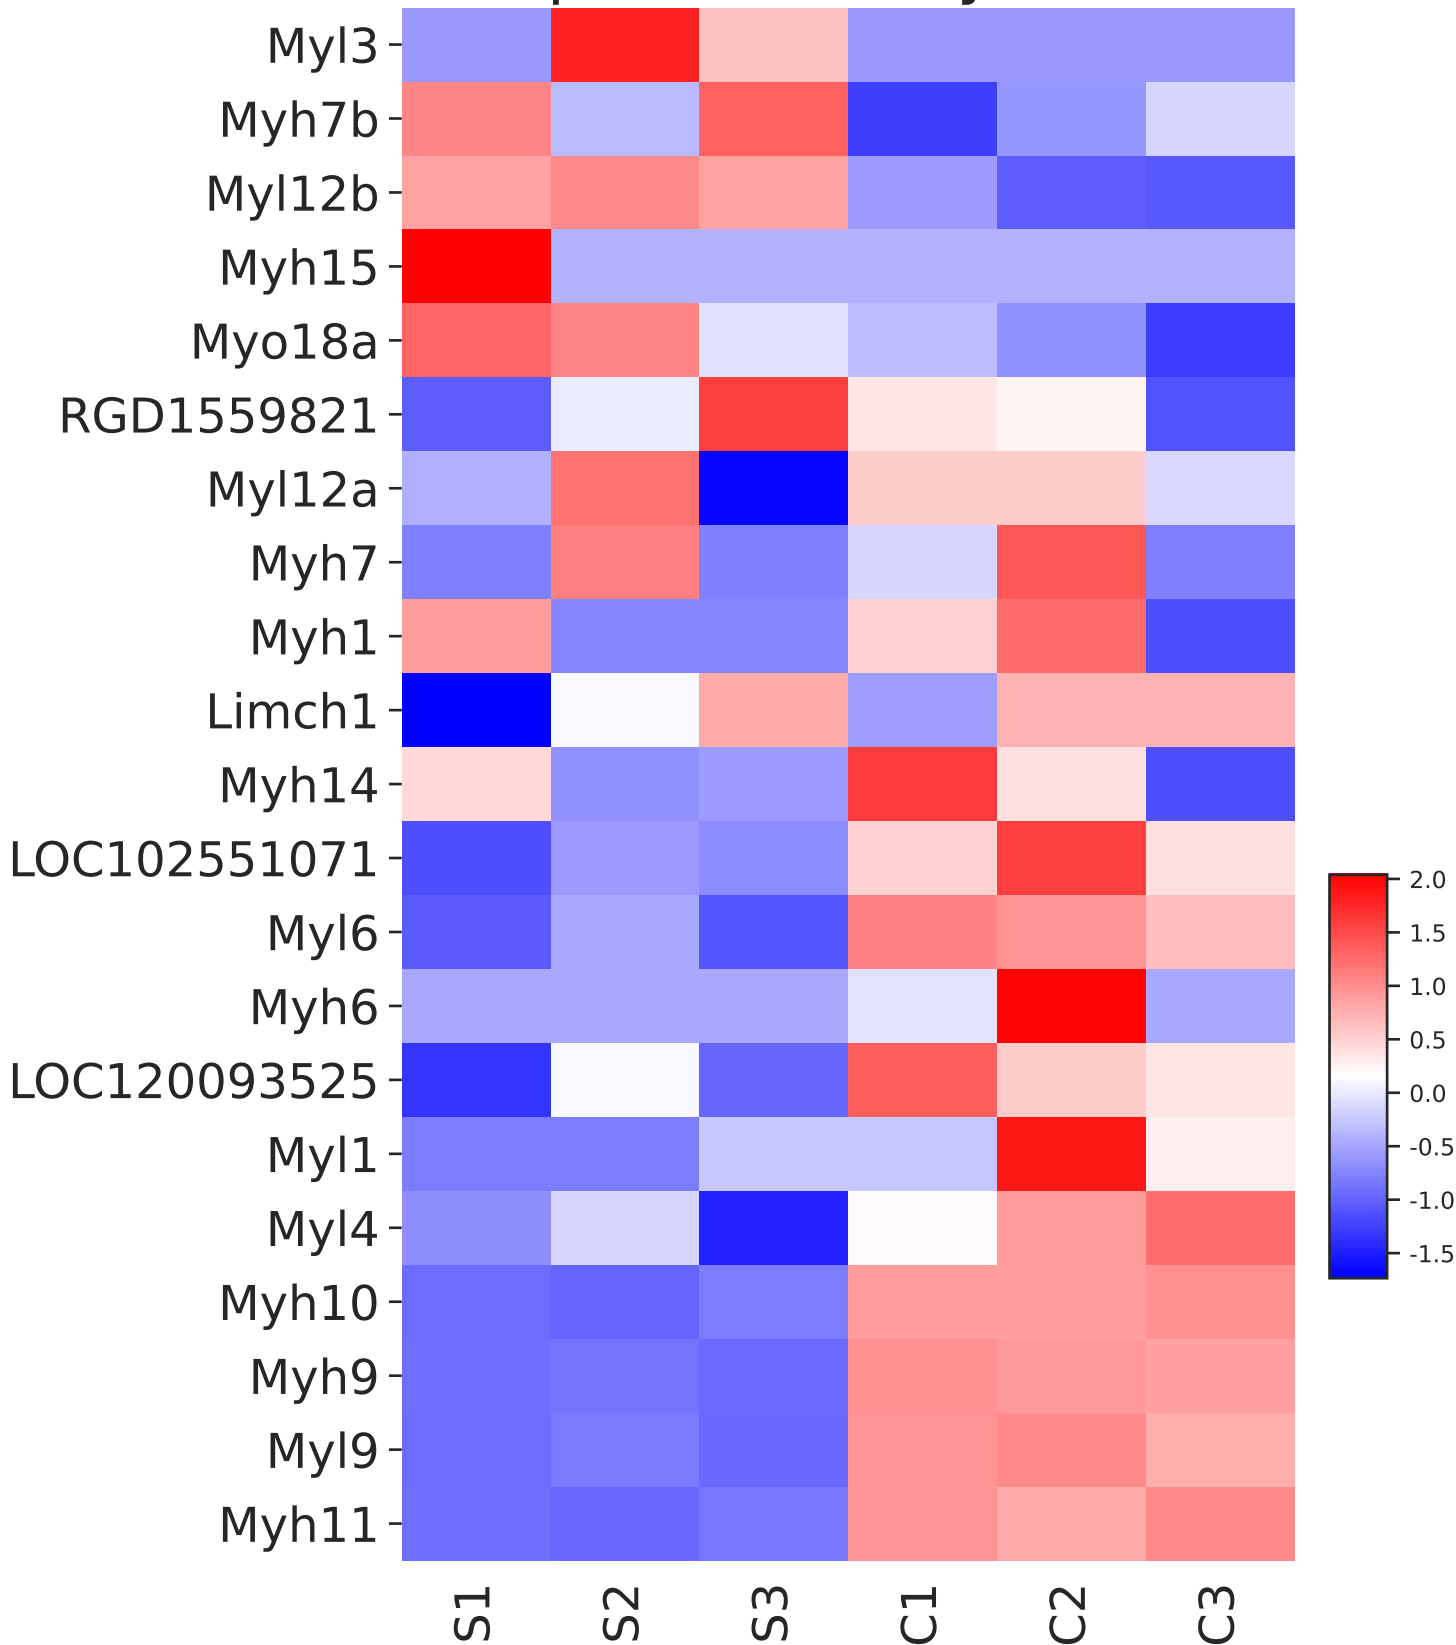

Supplement: Supplementary file 70 [file 394_myosin II complex(GO_0016460).heatmap.pdf › Source data/1.RNA-Seq source data/1.BMSCs/result/1.6.GSEA/S-vs-C/go/CC/394_myosin II complex(GO_0016460).heatmap.pdf]

# extracellular matrix(GO:0031012)

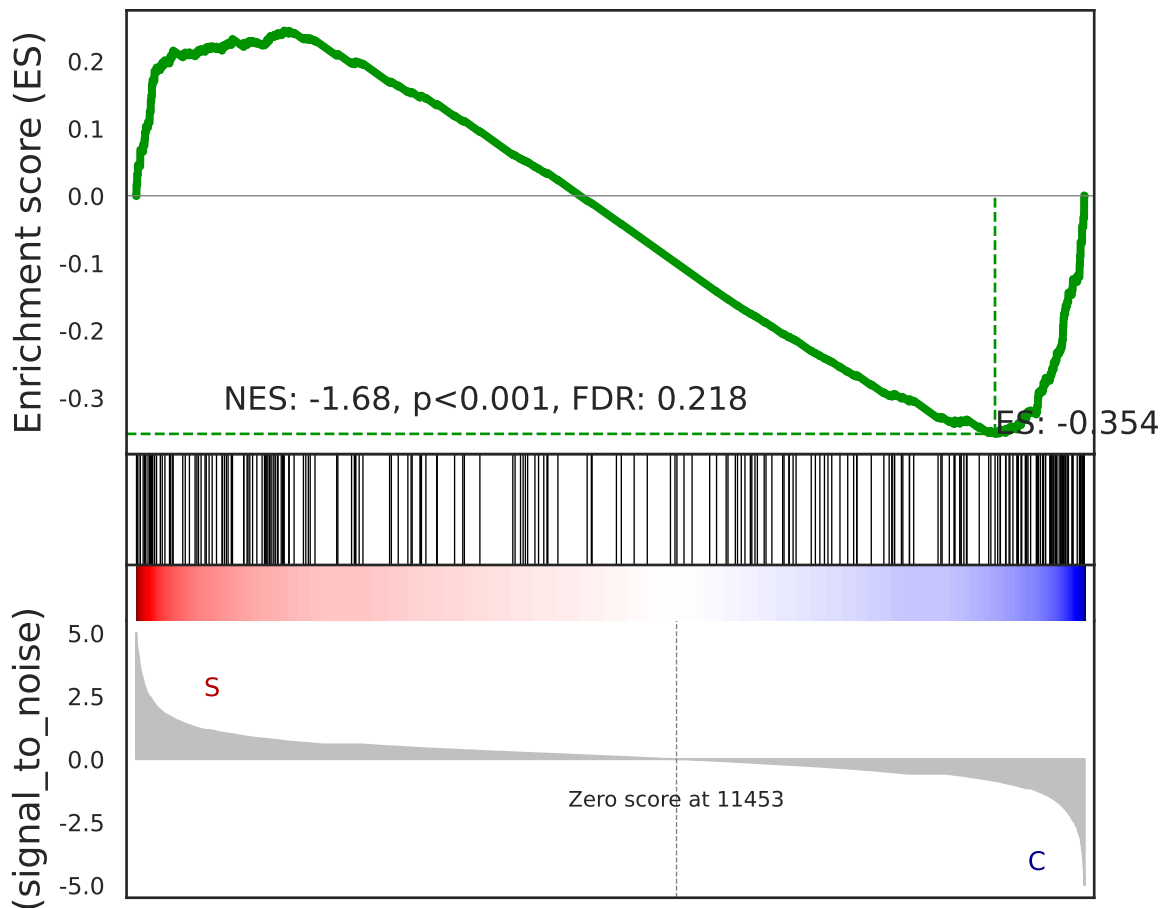

Supplement: Supplementary file 71 [file 395_extracellular matrix(GO_0031012).gsea.pdf › Source data/1.RNA-Seq source data/1.BMSCs/result/1.6.GSEA/S-vs-C/go/CC/395_extracellular matrix(GO_0031012).gsea.pdf]

extracellular matrix(GO:0031012)  
Heatmap of the Analyzed GeneSet

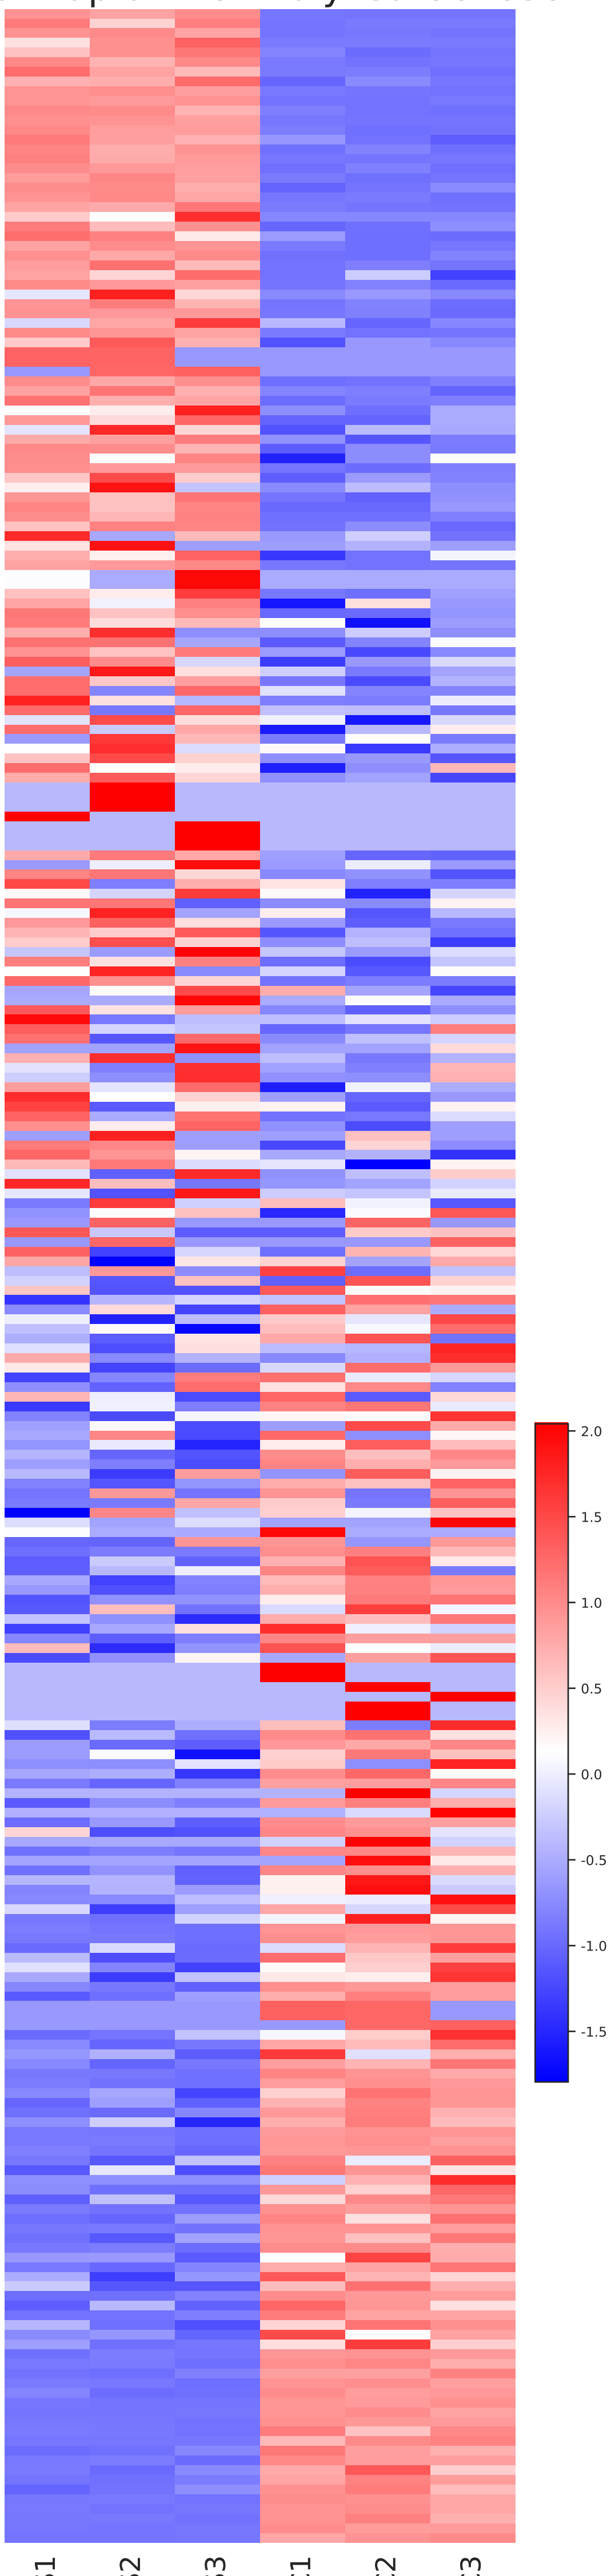

Supplement: Supplementary file 72 [file 395_extracellular matrix(GO_0031012).heatmap.pdf › Source data/1.RNA-Seq source data/1.BMSCs/result/1.6.GSEA/S-vs-C/go/CC/395_extracellular matrix(GO_0031012).heatmap.pdf]

# stress fiber(GO:0001725)

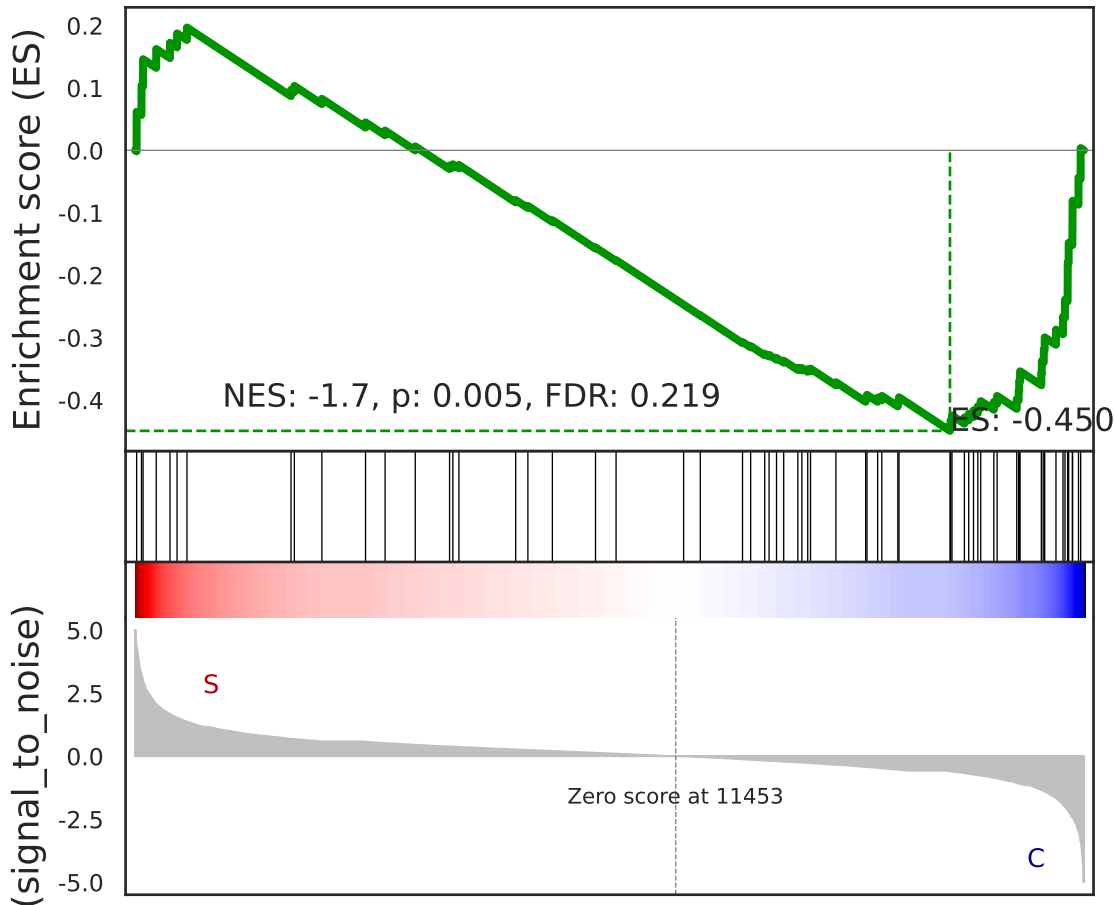

Supplement: Supplementary file 73 [file 396_stress fiber(GO_0001725).gsea.pdf › Source data/1.RNA-Seq source data/1.BMSCs/result/1.6.GSEA/S-vs-C/go/CC/396_stress fiber(GO_0001725).gsea.pdf]

stress fiber(GO:0001725)  
Heatmap of the Analyzed GeneSet

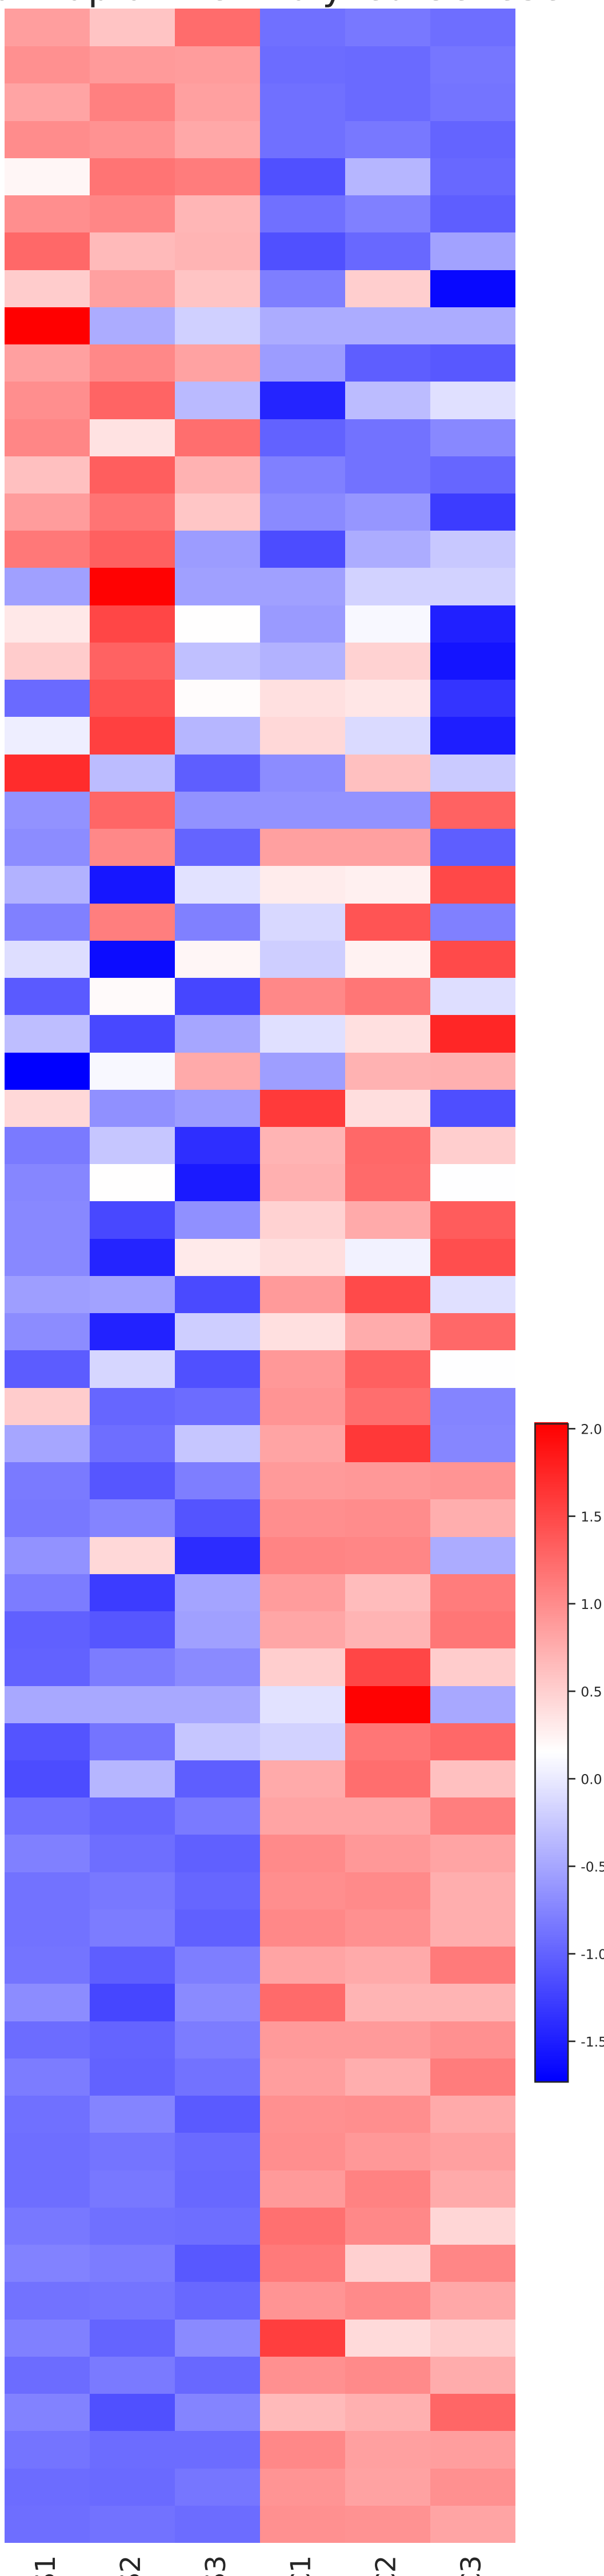

Supplement: Supplementary file 74 [file 396_stress fiber(GO_0001725).heatmap.pdf › Source data/1.RNA-Seq source data/1.BMSCs/result/1.6.GSEA/S-vs-C/go/CC/396_stress fiber(GO_0001725).heatmap.pdf]

# myosin complex(GO:0016459)

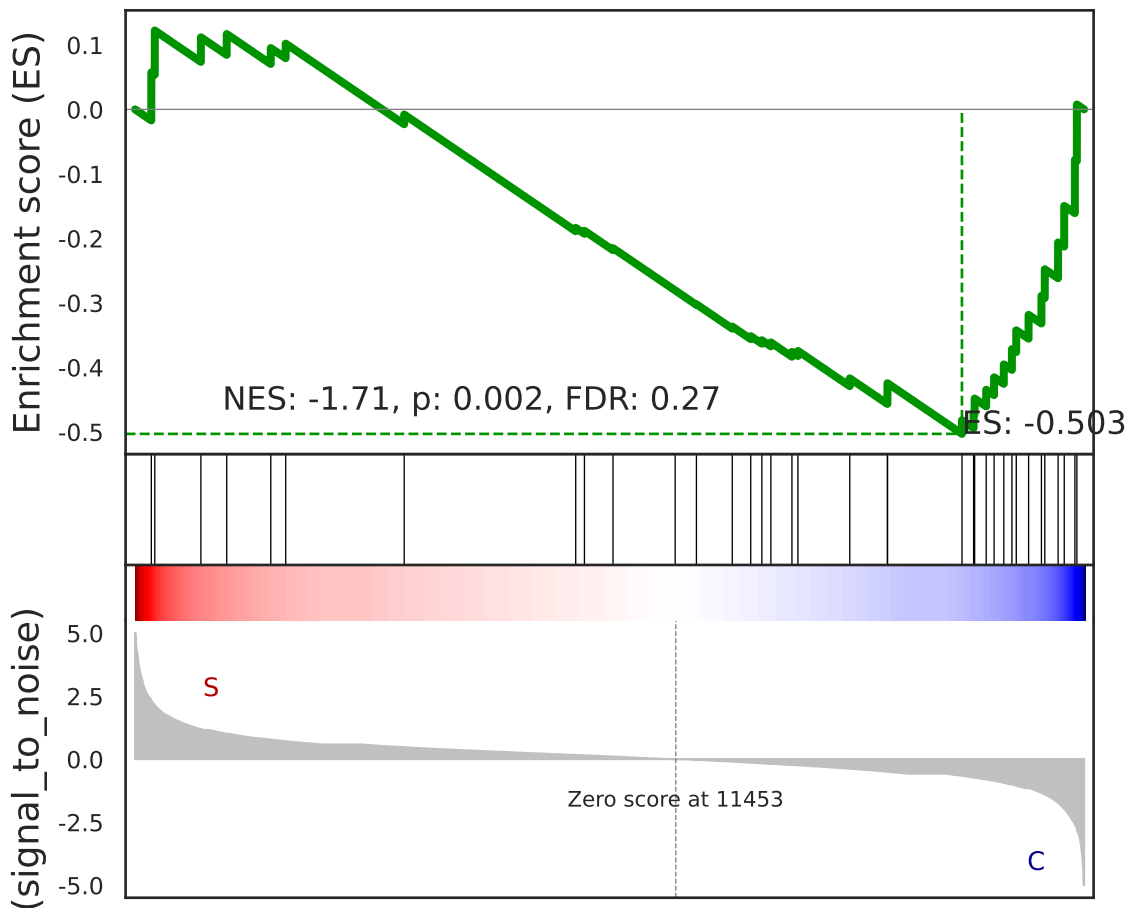

Supplement: Supplementary file 75 [file 397_myosin complex(GO_0016459).gsea.pdf › Source data/1.RNA-Seq source data/1.BMSCs/result/1.6.GSEA/S-vs-C/go/CC/397_myosin complex(GO_0016459).gsea.pdf]

myosin complex(GO:0016459)  
Heatmap of the Analyzed GeneSet

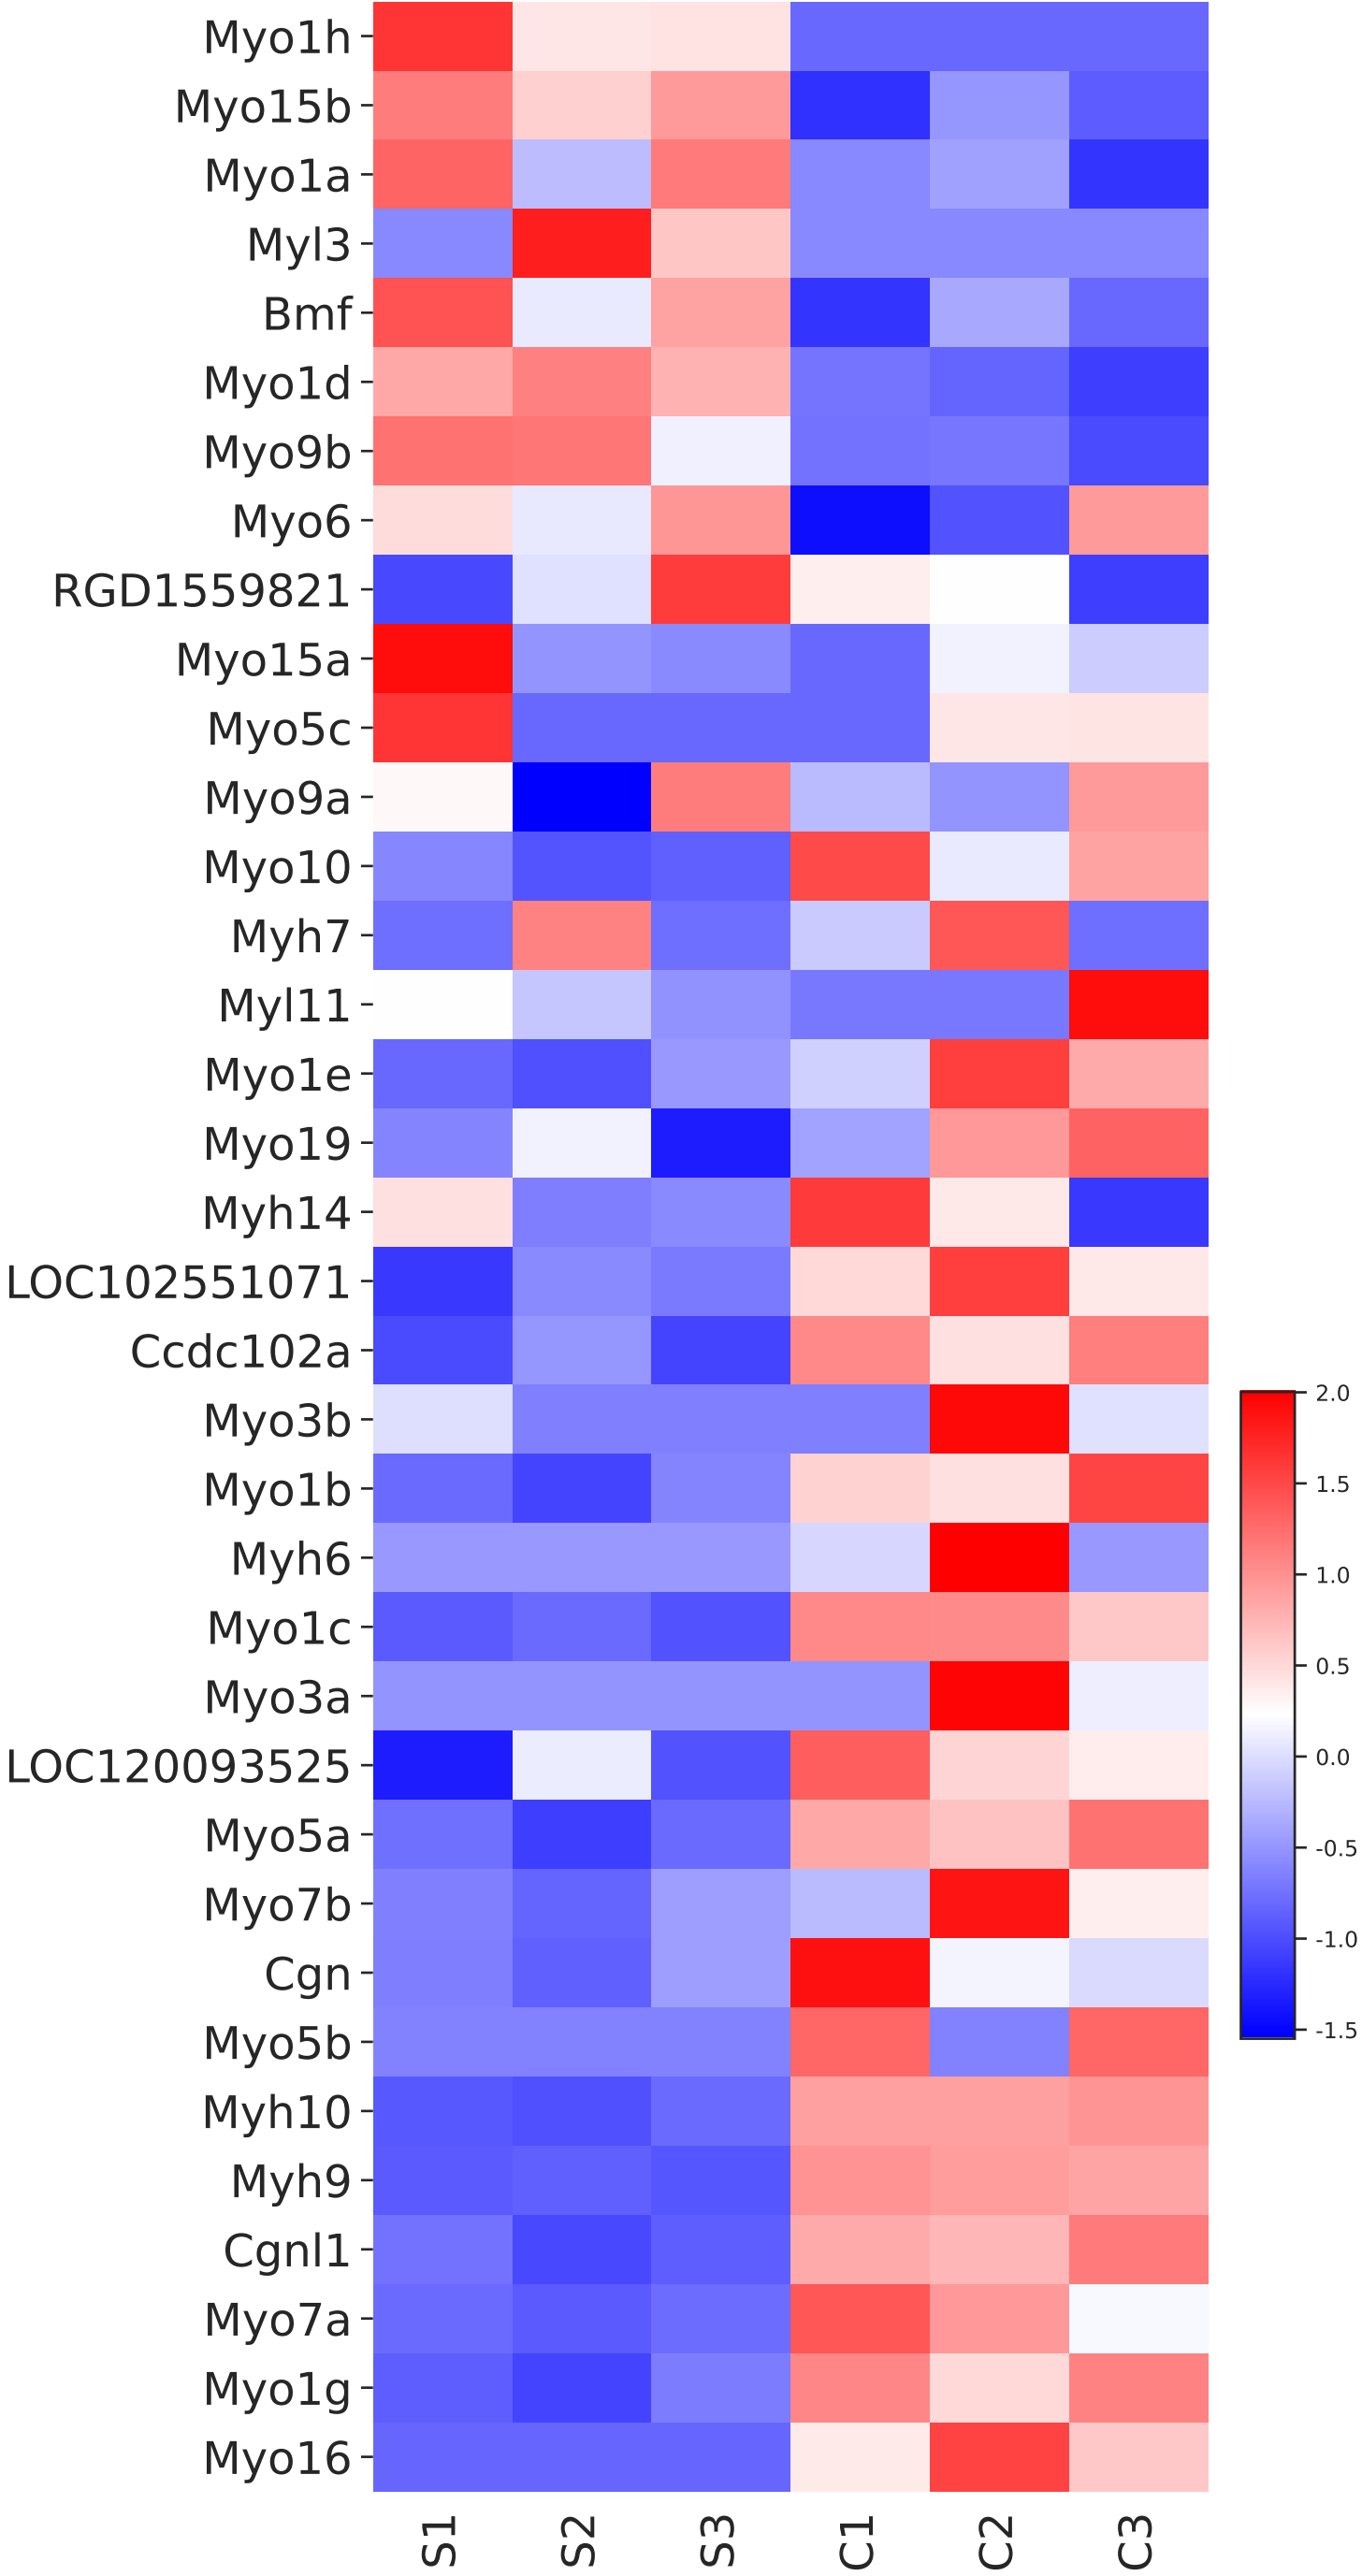

Supplement: Supplementary file 76 [file 397_myosin complex(GO_0016459).heatmap.pdf › Source data/1.RNA-Seq source data/1.BMSCs/result/1.6.GSEA/S-vs-C/go/CC/397_myosin complex(GO_0016459).heatmap.pdf]

# myosin filament(GO:0032982)

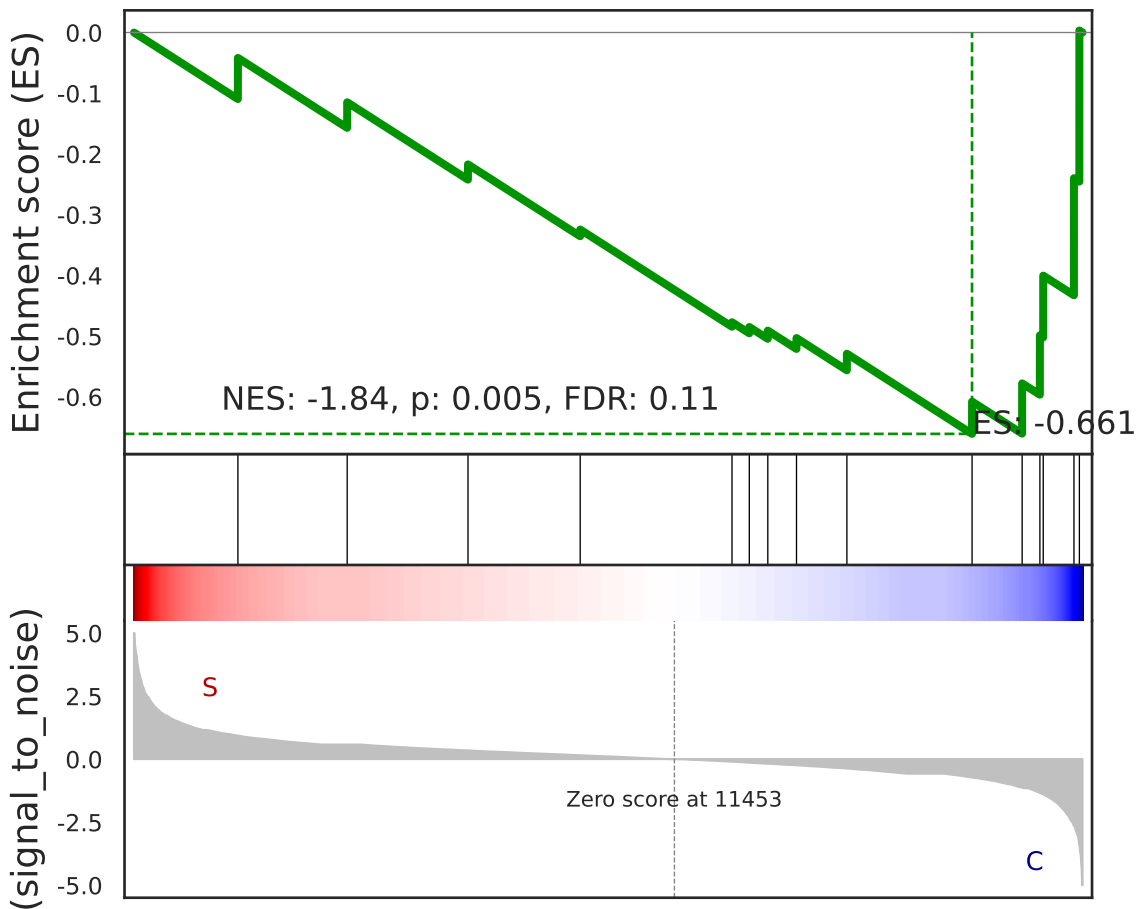

Supplement: Supplementary file 77 [file 398_myosin filament(GO_0032982).gsea.pdf › Source data/1.RNA-Seq source data/1.BMSCs/result/1.6.GSEA/S-vs-C/go/CC/398_myosin filament(GO_0032982).gsea.pdf]

# myosin filament(GO:0032982)

## Heatmap of the Analyzed GeneSet

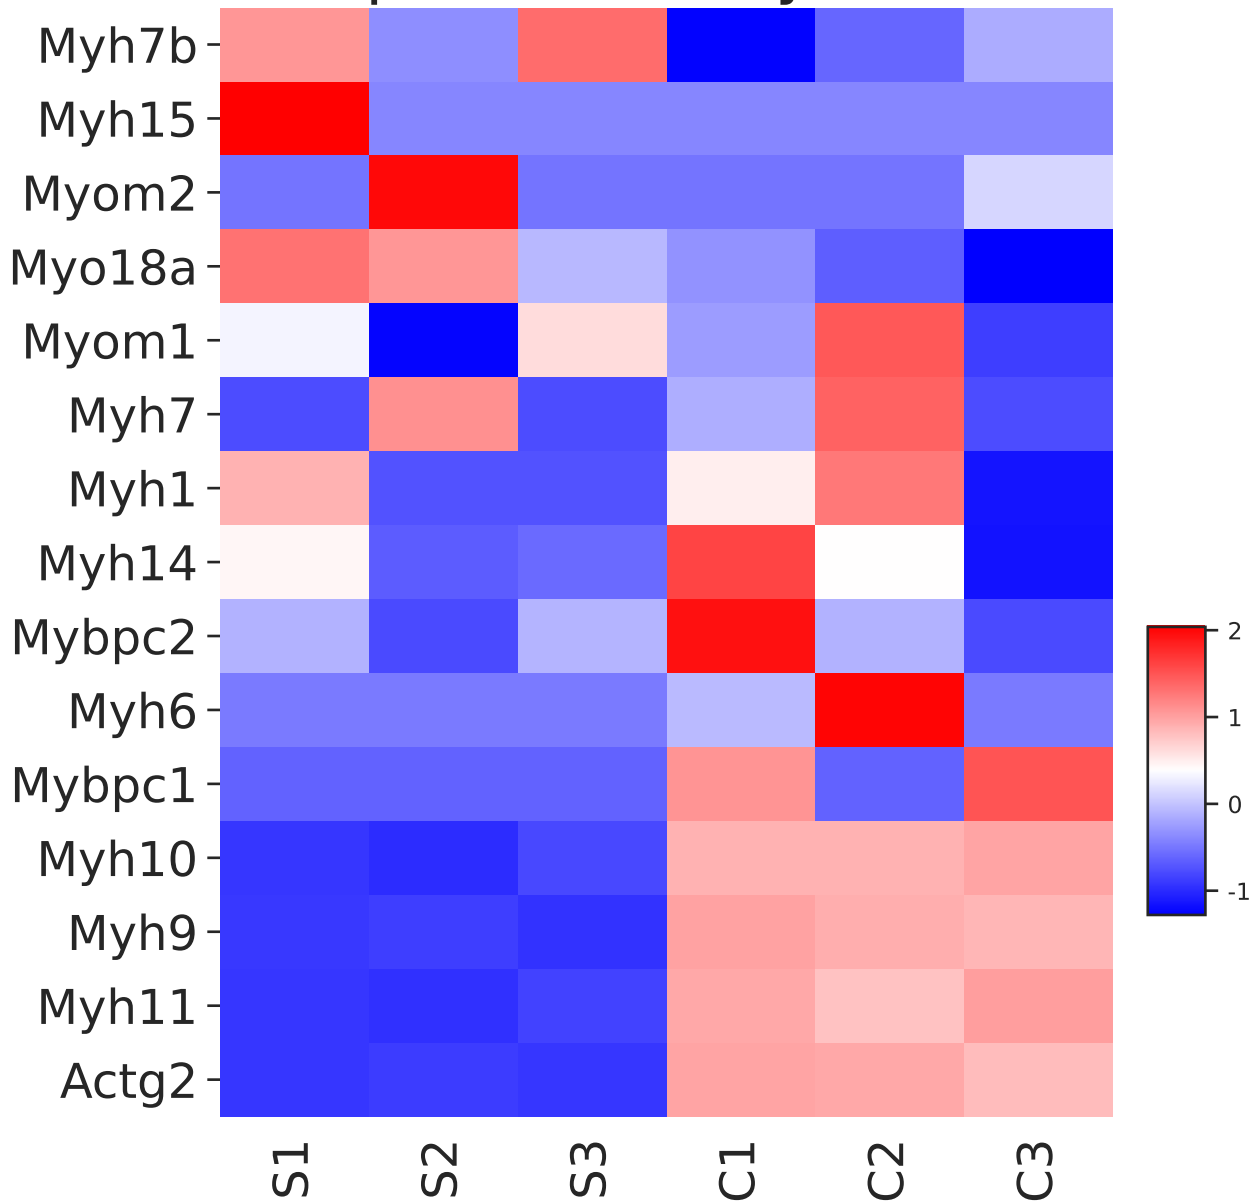

Supplement: Supplementary file 78 [file 398_myosin filament(GO_0032982).heatmap.pdf › Source data/1.RNA-Seq source data/1.BMSCs/result/1.6.GSEA/S-vs-C/go/CC/398_myosin filament(GO_0032982).heatmap.pdf]

# kinetochore(GO:0000776)

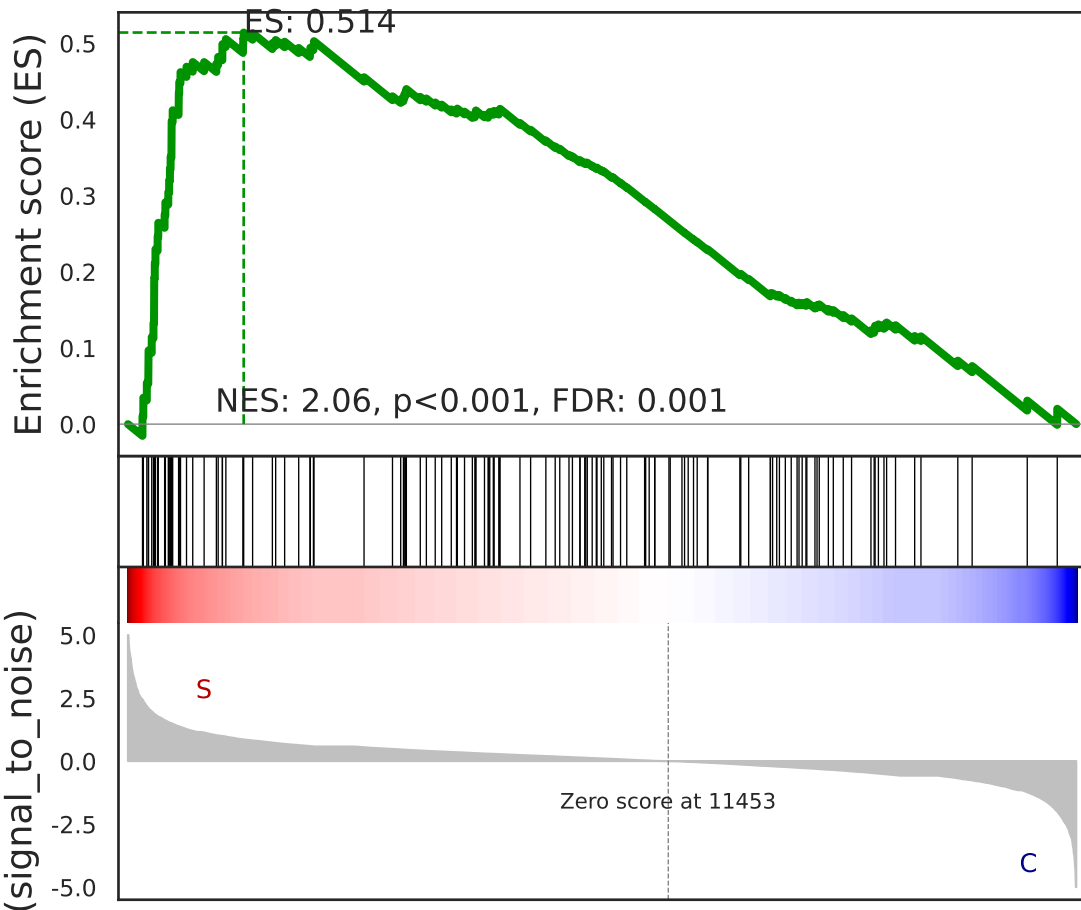

Supplement: Supplementary file 79 [file 3_kinetochore(GO_0000776).gsea.pdf › Source data/1.RNA-Seq source data/1.BMSCs/result/1.6.GSEA/S-vs-C/go/CC/3_kinetochore(GO_0000776).gsea.pdf]

kinetochore(GO:0000776)

Heatmap of the Analyzed GeneSet

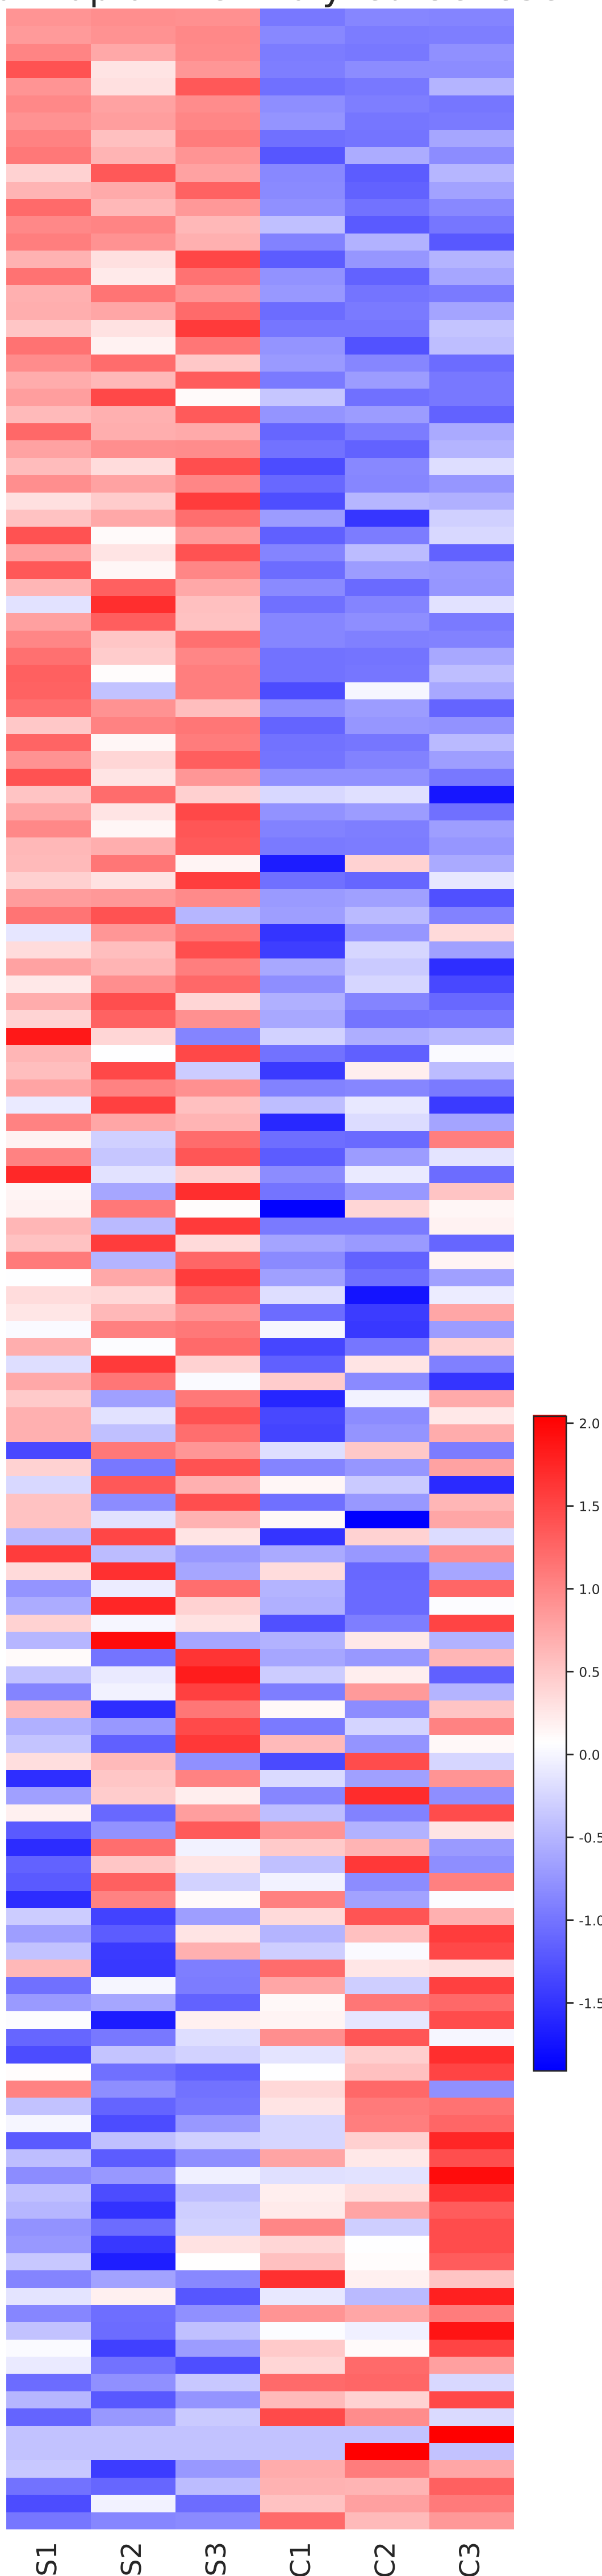

Supplement: Supplementary file 80 [file 3_kinetochore(GO_0000776).heatmap.pdf › Source data/1.RNA-Seq source data/1.BMSCs/result/1.6.GSEA/S-vs-C/go/CC/3_kinetochore(GO_0000776).heatmap.pdf]

# outer kinetochore(GO:0000940)

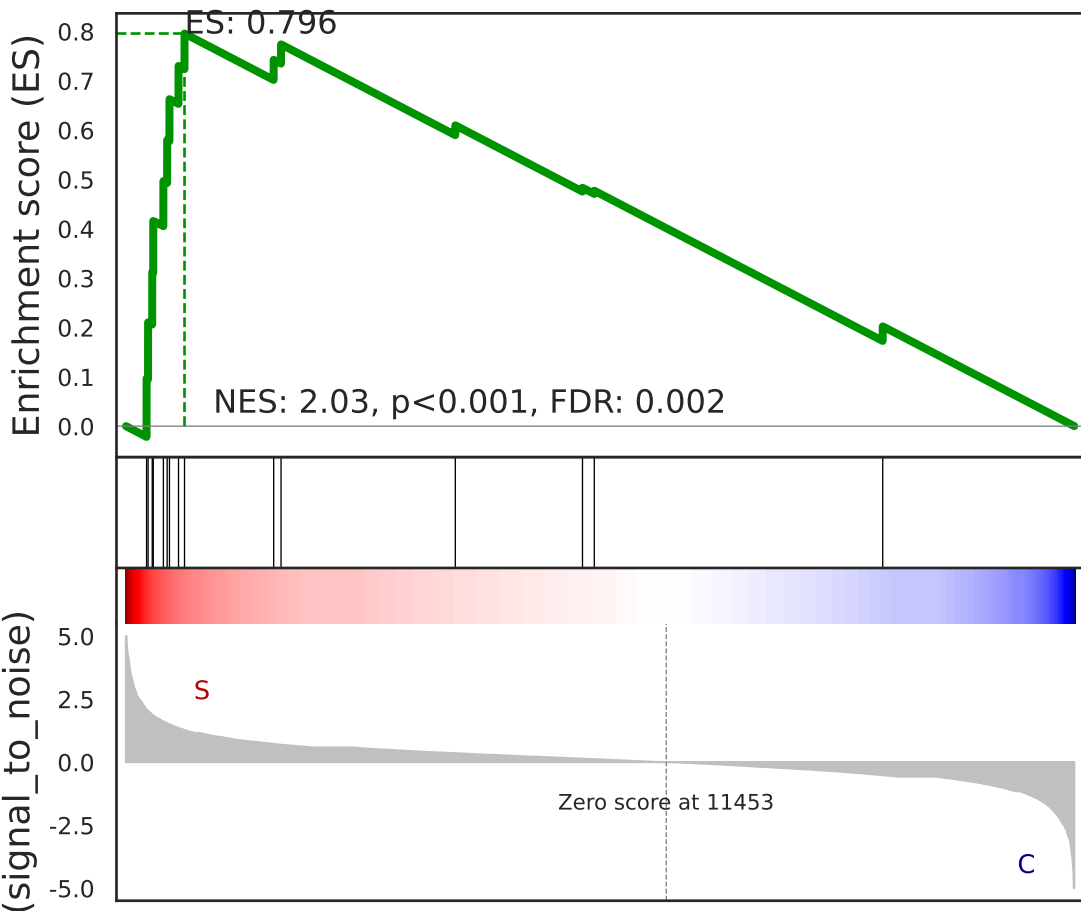

Supplement: Supplementary file 81 [file 4_outer kinetochore(GO_0000940).gsea.pdf › Source data/1.RNA-Seq source data/1.BMSCs/result/1.6.GSEA/S-vs-C/go/CC/4_outer kinetochore(GO_0000940).gsea.pdf]

# outer kinetochore(GO:0000940)

## Heatmap of the Analyzed GeneSet

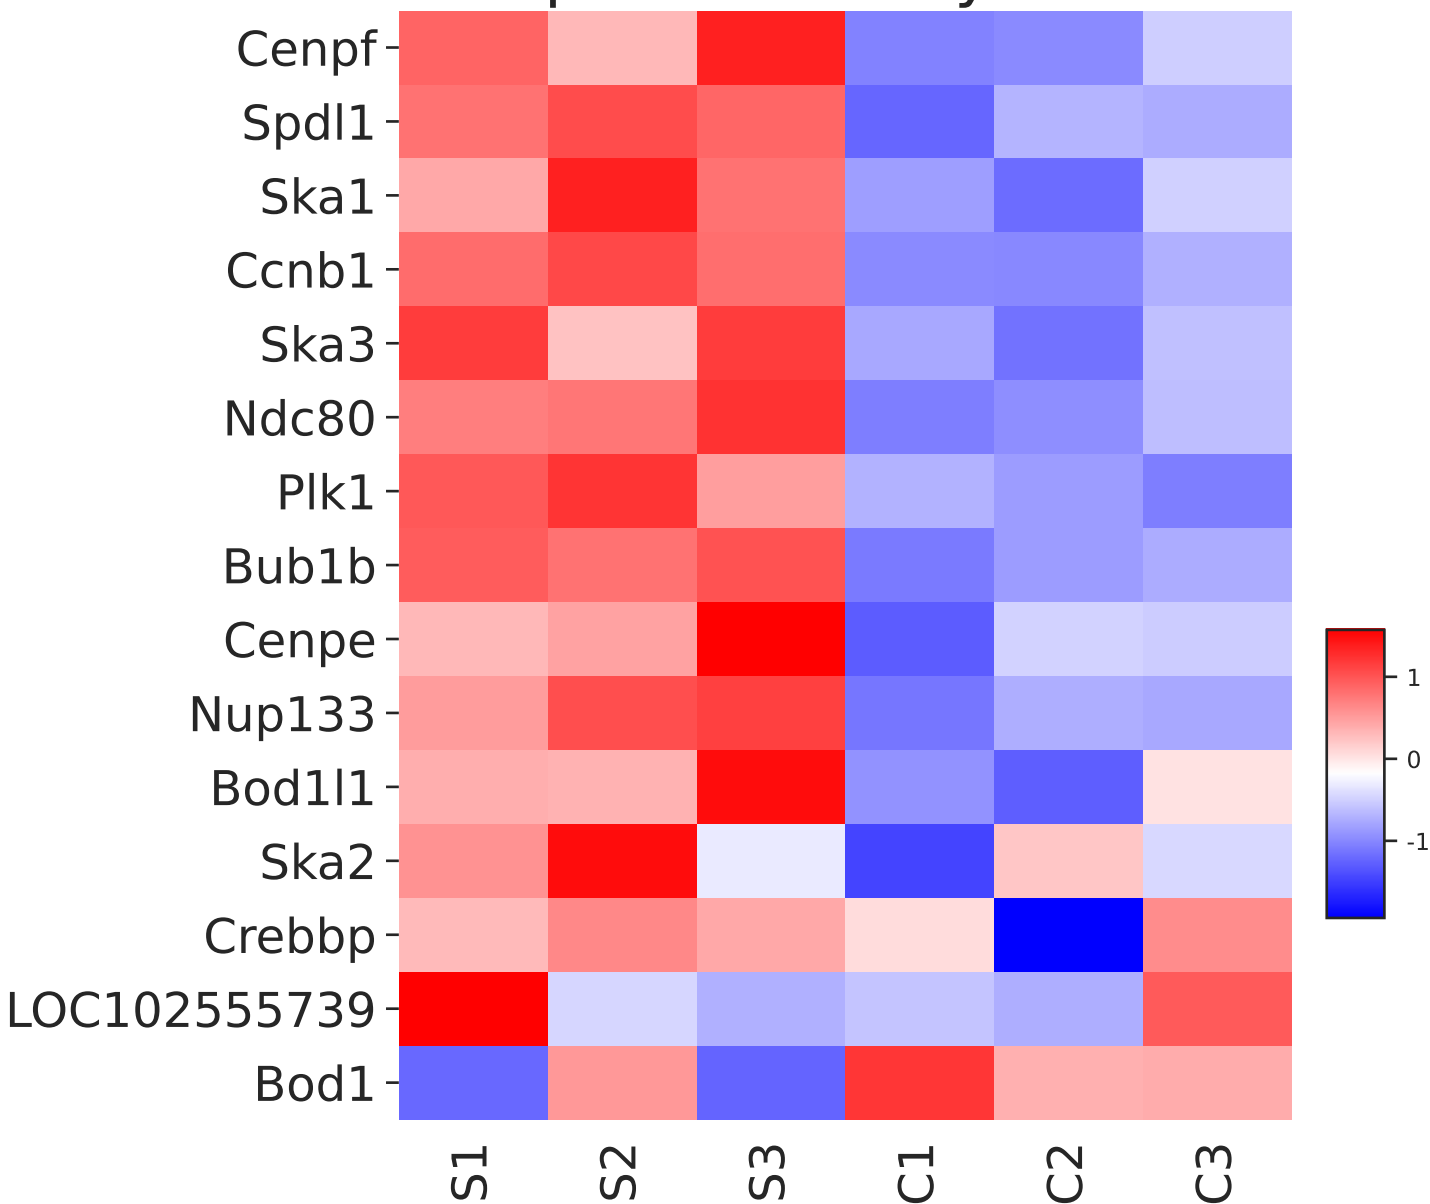

Supplement: Supplementary file 82 [file 4_outer kinetochore(GO_0000940).heatmap.pdf › Source data/1.RNA-Seq source data/1.BMSCs/result/1.6.GSEA/S-vs-C/go/CC/4_outer kinetochore(GO_0000940).heatmap.pdf]

# extrinsic component of plasma membrane(GO:0019897)

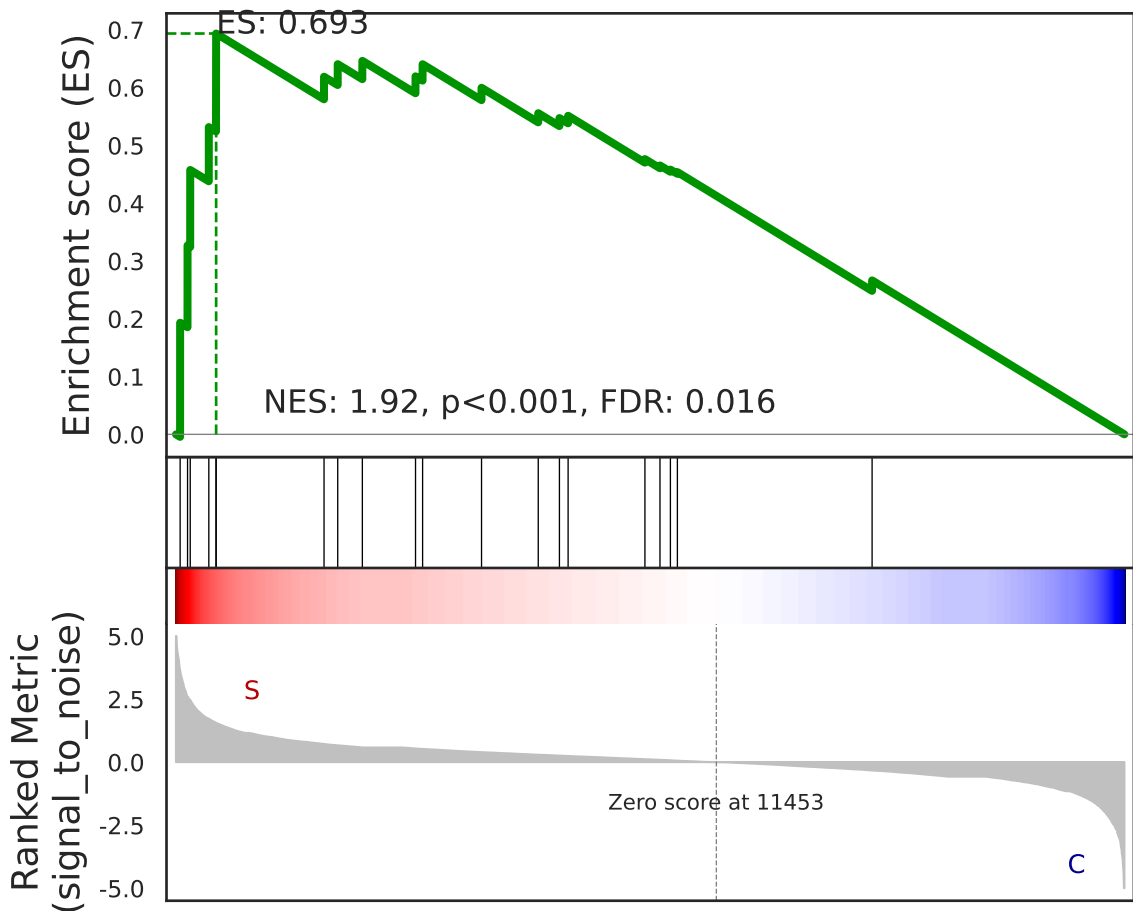

Supplement: Supplementary file 83 [file 5_extrinsic component of plasma membrane(GO_0019897).gsea.pdf › Source data/1.RNA-Seq source data/1.BMSCs/result/1.6.GSEA/S-vs-C/go/CC/5_extrinsic component of plasma membrane(GO_0019897).gsea.pdf]

extrinsic component of plasma membrane(GO:0019897)

Heatmap of the Analyzed GeneSet

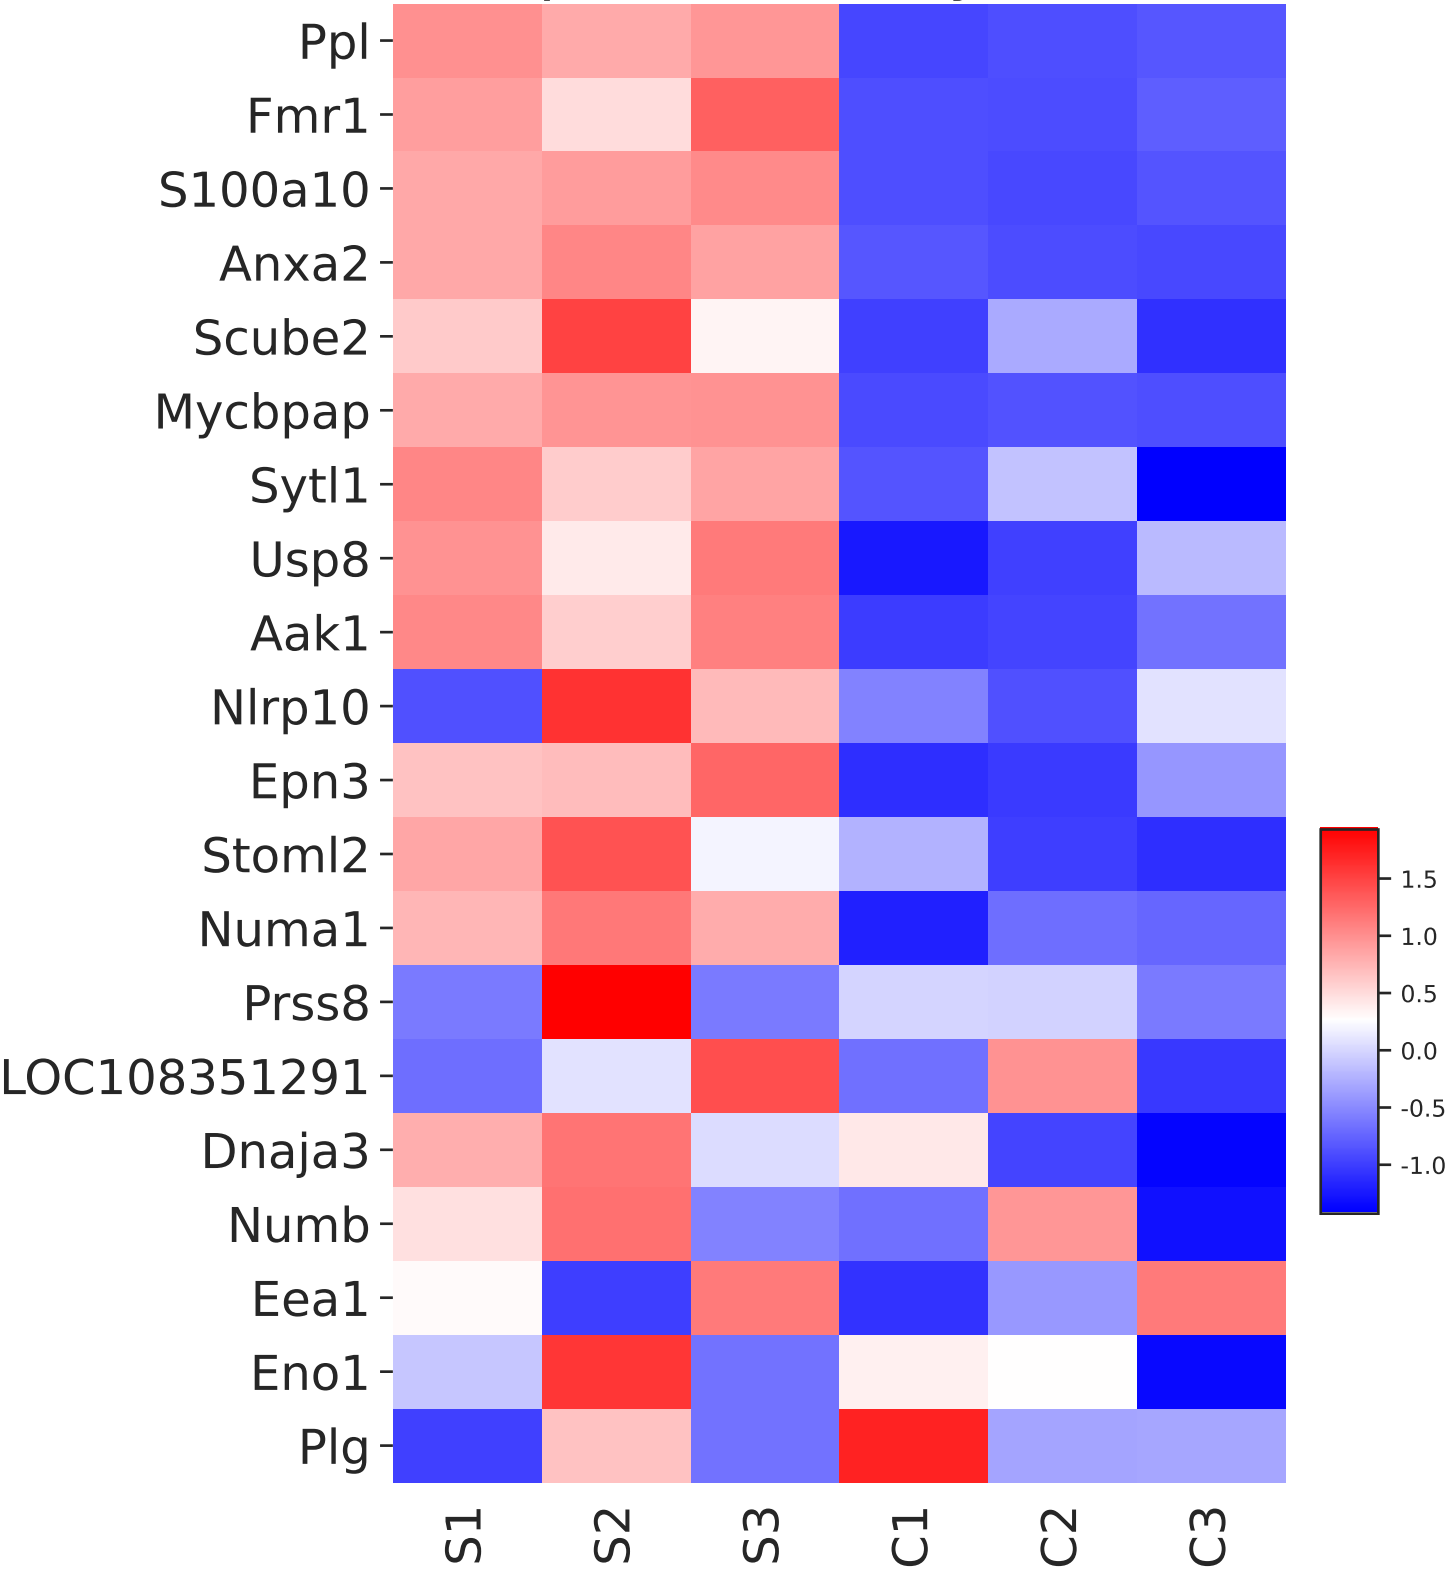

Supplement: Supplementary file 84 [file 5_extrinsic component of plasma membrane(GO_0019897).heatmap.pdf › Source data/1.RNA-Seq source data/1.BMSCs/result/1.6.GSEA/S-vs-C/go/CC/5_extrinsic component of plasma membrane(GO_0019897).heatmap.pdf]

# cyclin-dependent protein kinase holoenzyme complex(GO:0000307)

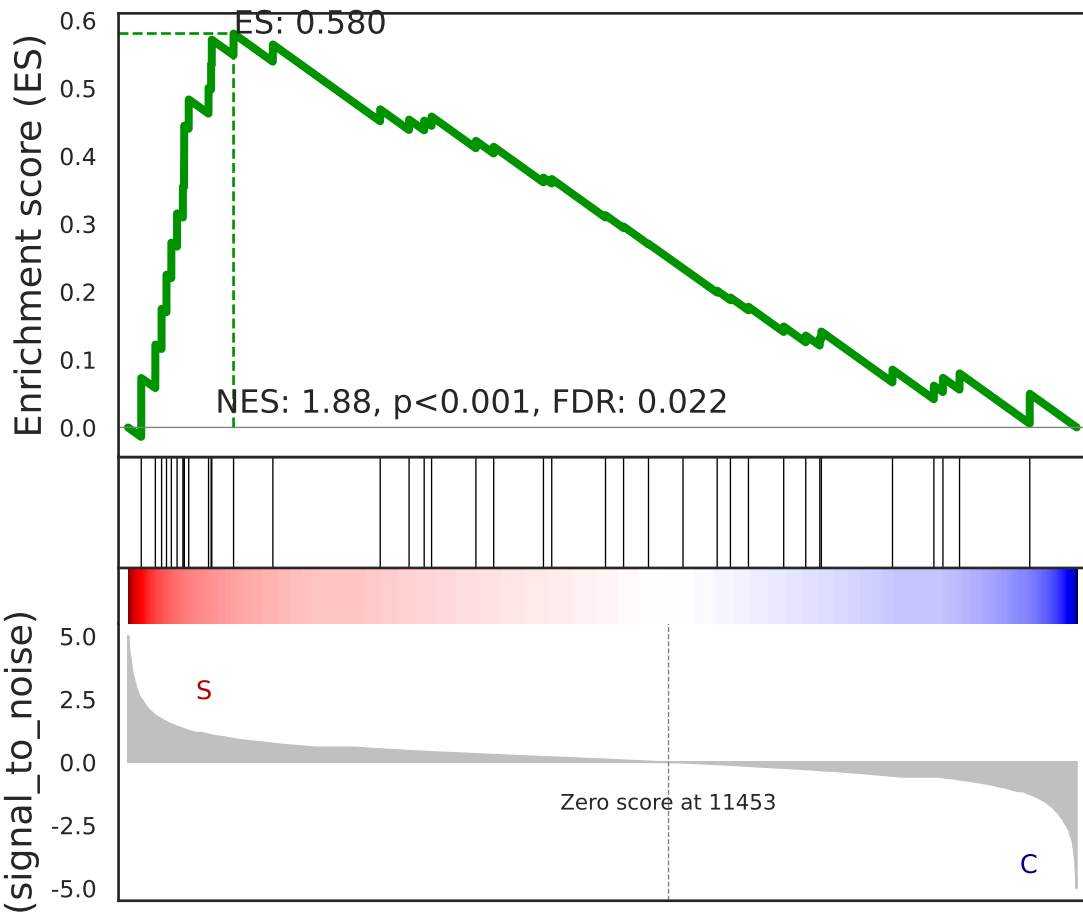

Supplement: Supplementary file 85 [file 6_cyclin-dependent protein kinase holoenzyme complex(GO_0000307).gsea.pdf › Source data/1.RNA-Seq source data/1.BMSCs/result/1.6.GSEA/S-vs-C/go/CC/6_cyclin-dependent protein kinase holoenzyme complex(GO_0000307).gsea.pdf]

cyclin-dependent protein kinase holoenzyme complex(GO:0000307)

Heatmap of the Analyzed GeneSet

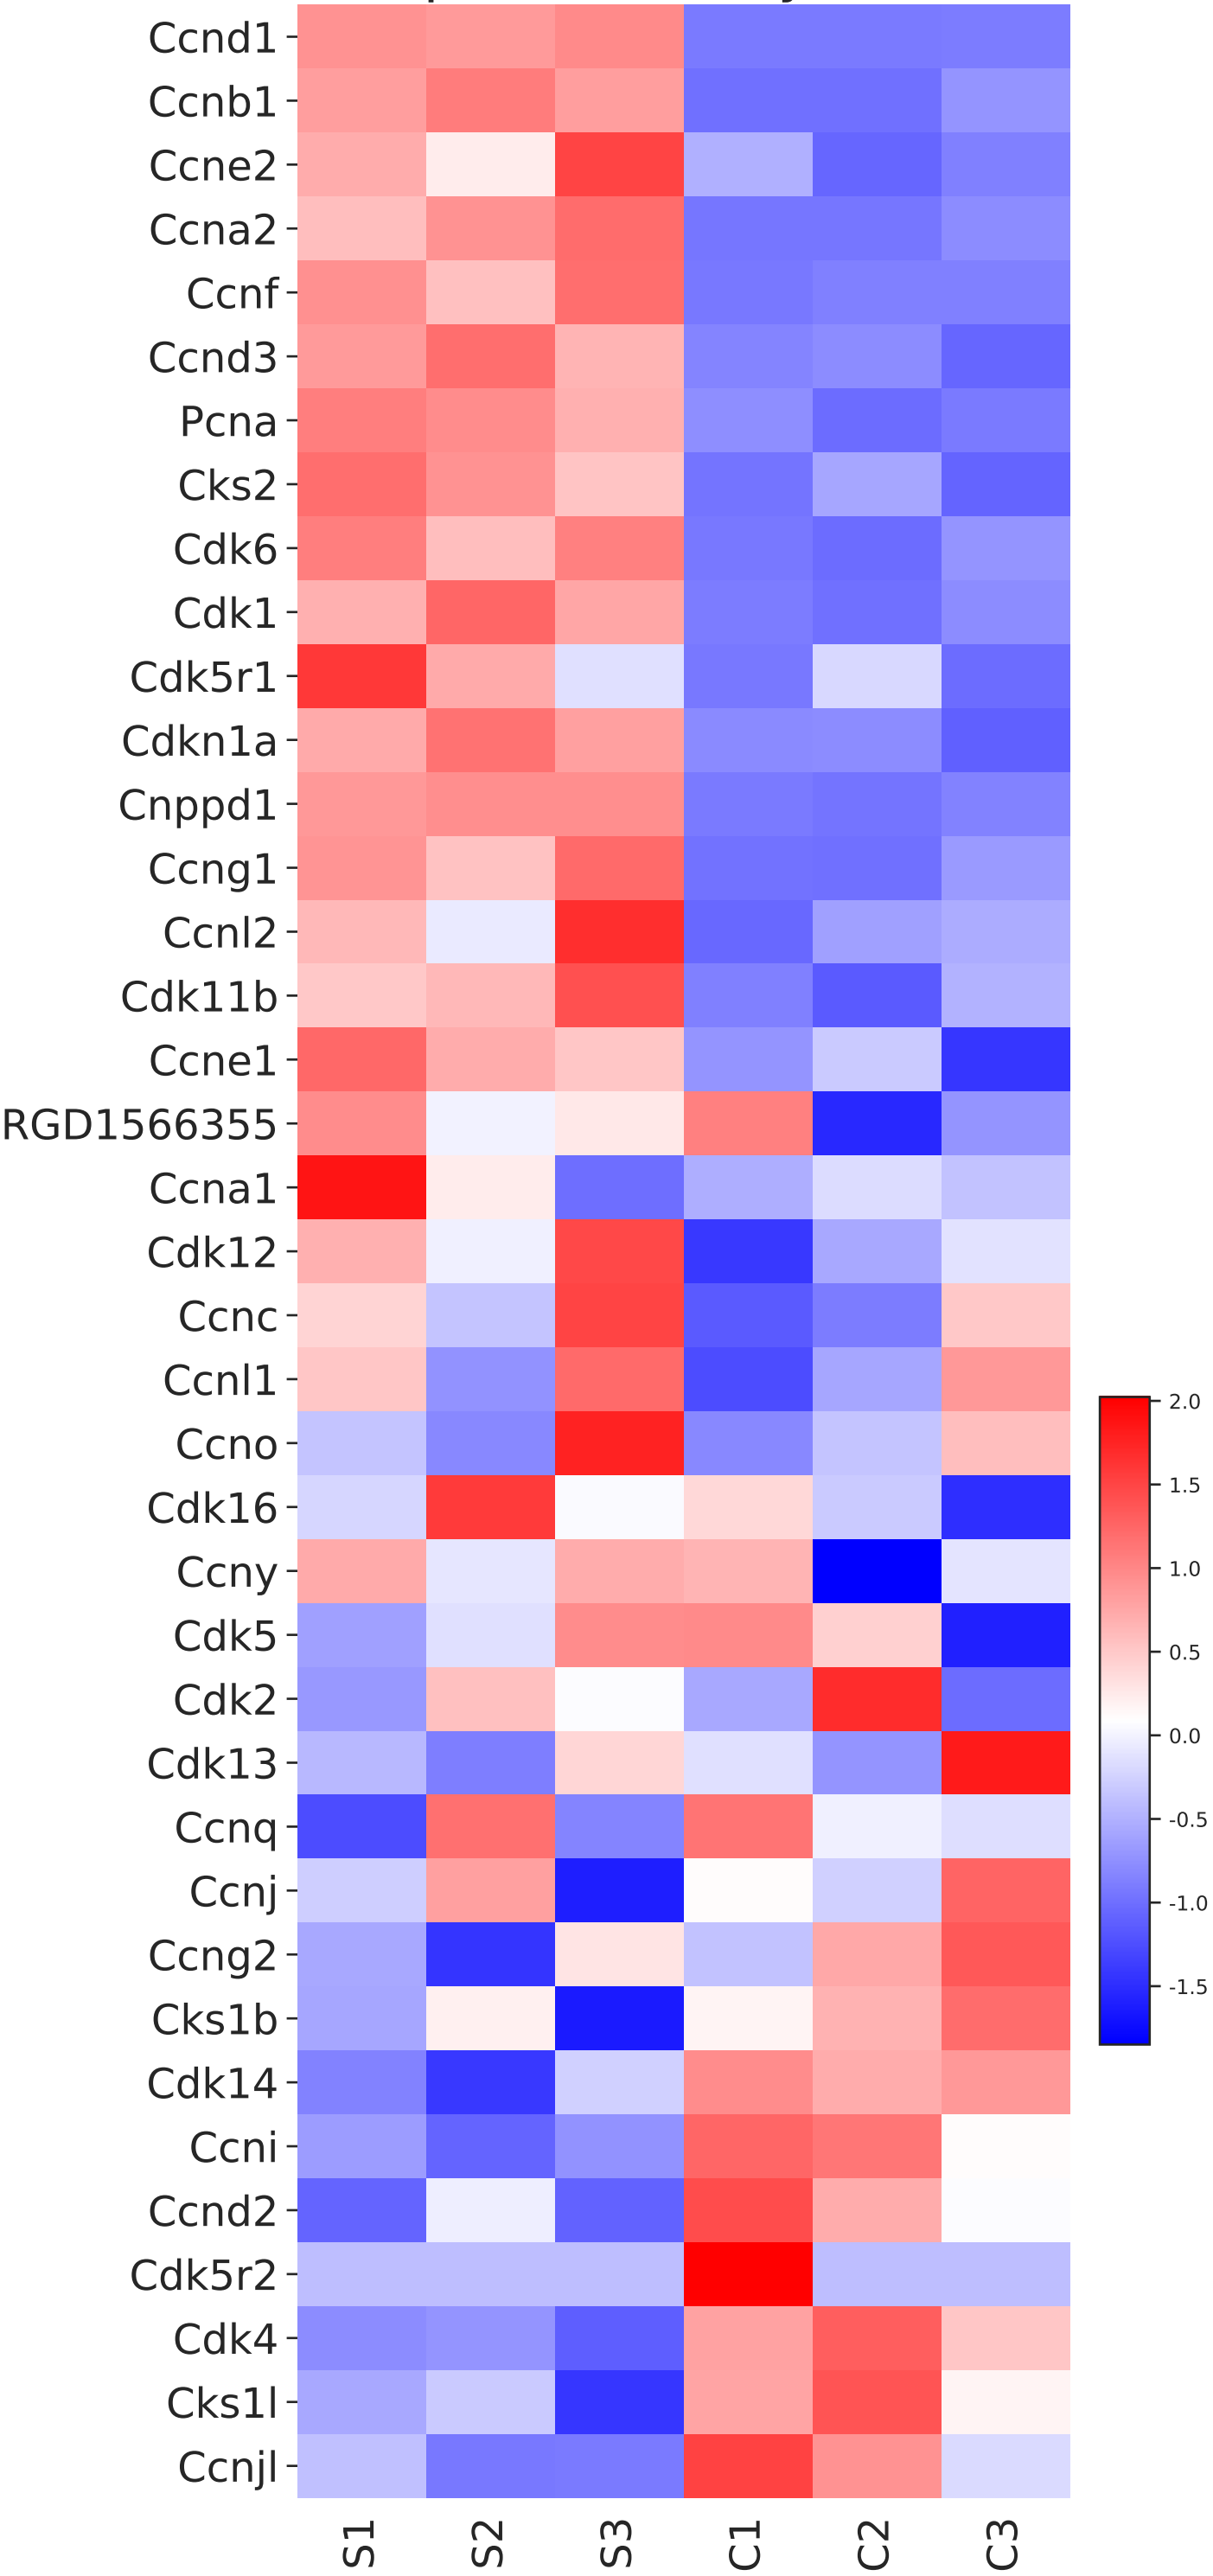

Supplement: Supplementary file 86 [file 6_cyclin-dependent protein kinase holoenzyme complex(GO_0000307).heatmap.pdf › Source data/1.RNA-Seq source data/1.BMSCs/result/1.6.GSEA/S-vs-C/go/CC/6_cyclin-dependent protein kinase holoenzyme complex(GO_0000307).heatmap.pdf]

# mitotic spindle pole(GO:0097431)

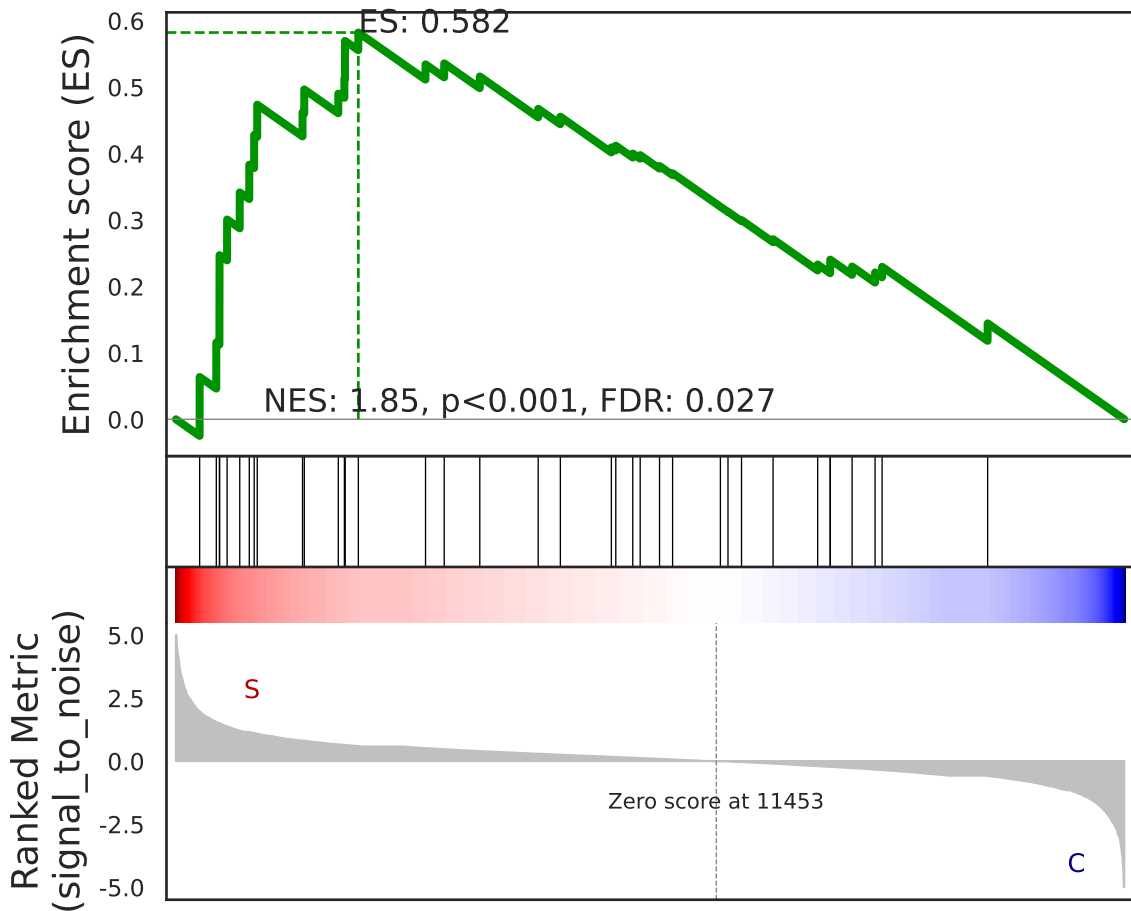

Supplement: Supplementary file 87 [file 7_mitotic spindle pole(GO_0097431).gsea.pdf › Source data/1.RNA-Seq source data/1.BMSCs/result/1.6.GSEA/S-vs-C/go/CC/7_mitotic spindle pole(GO_0097431).gsea.pdf]

mitotic spindle pole(GO:0097431)  
Heatmap of the Analyzed GeneSet

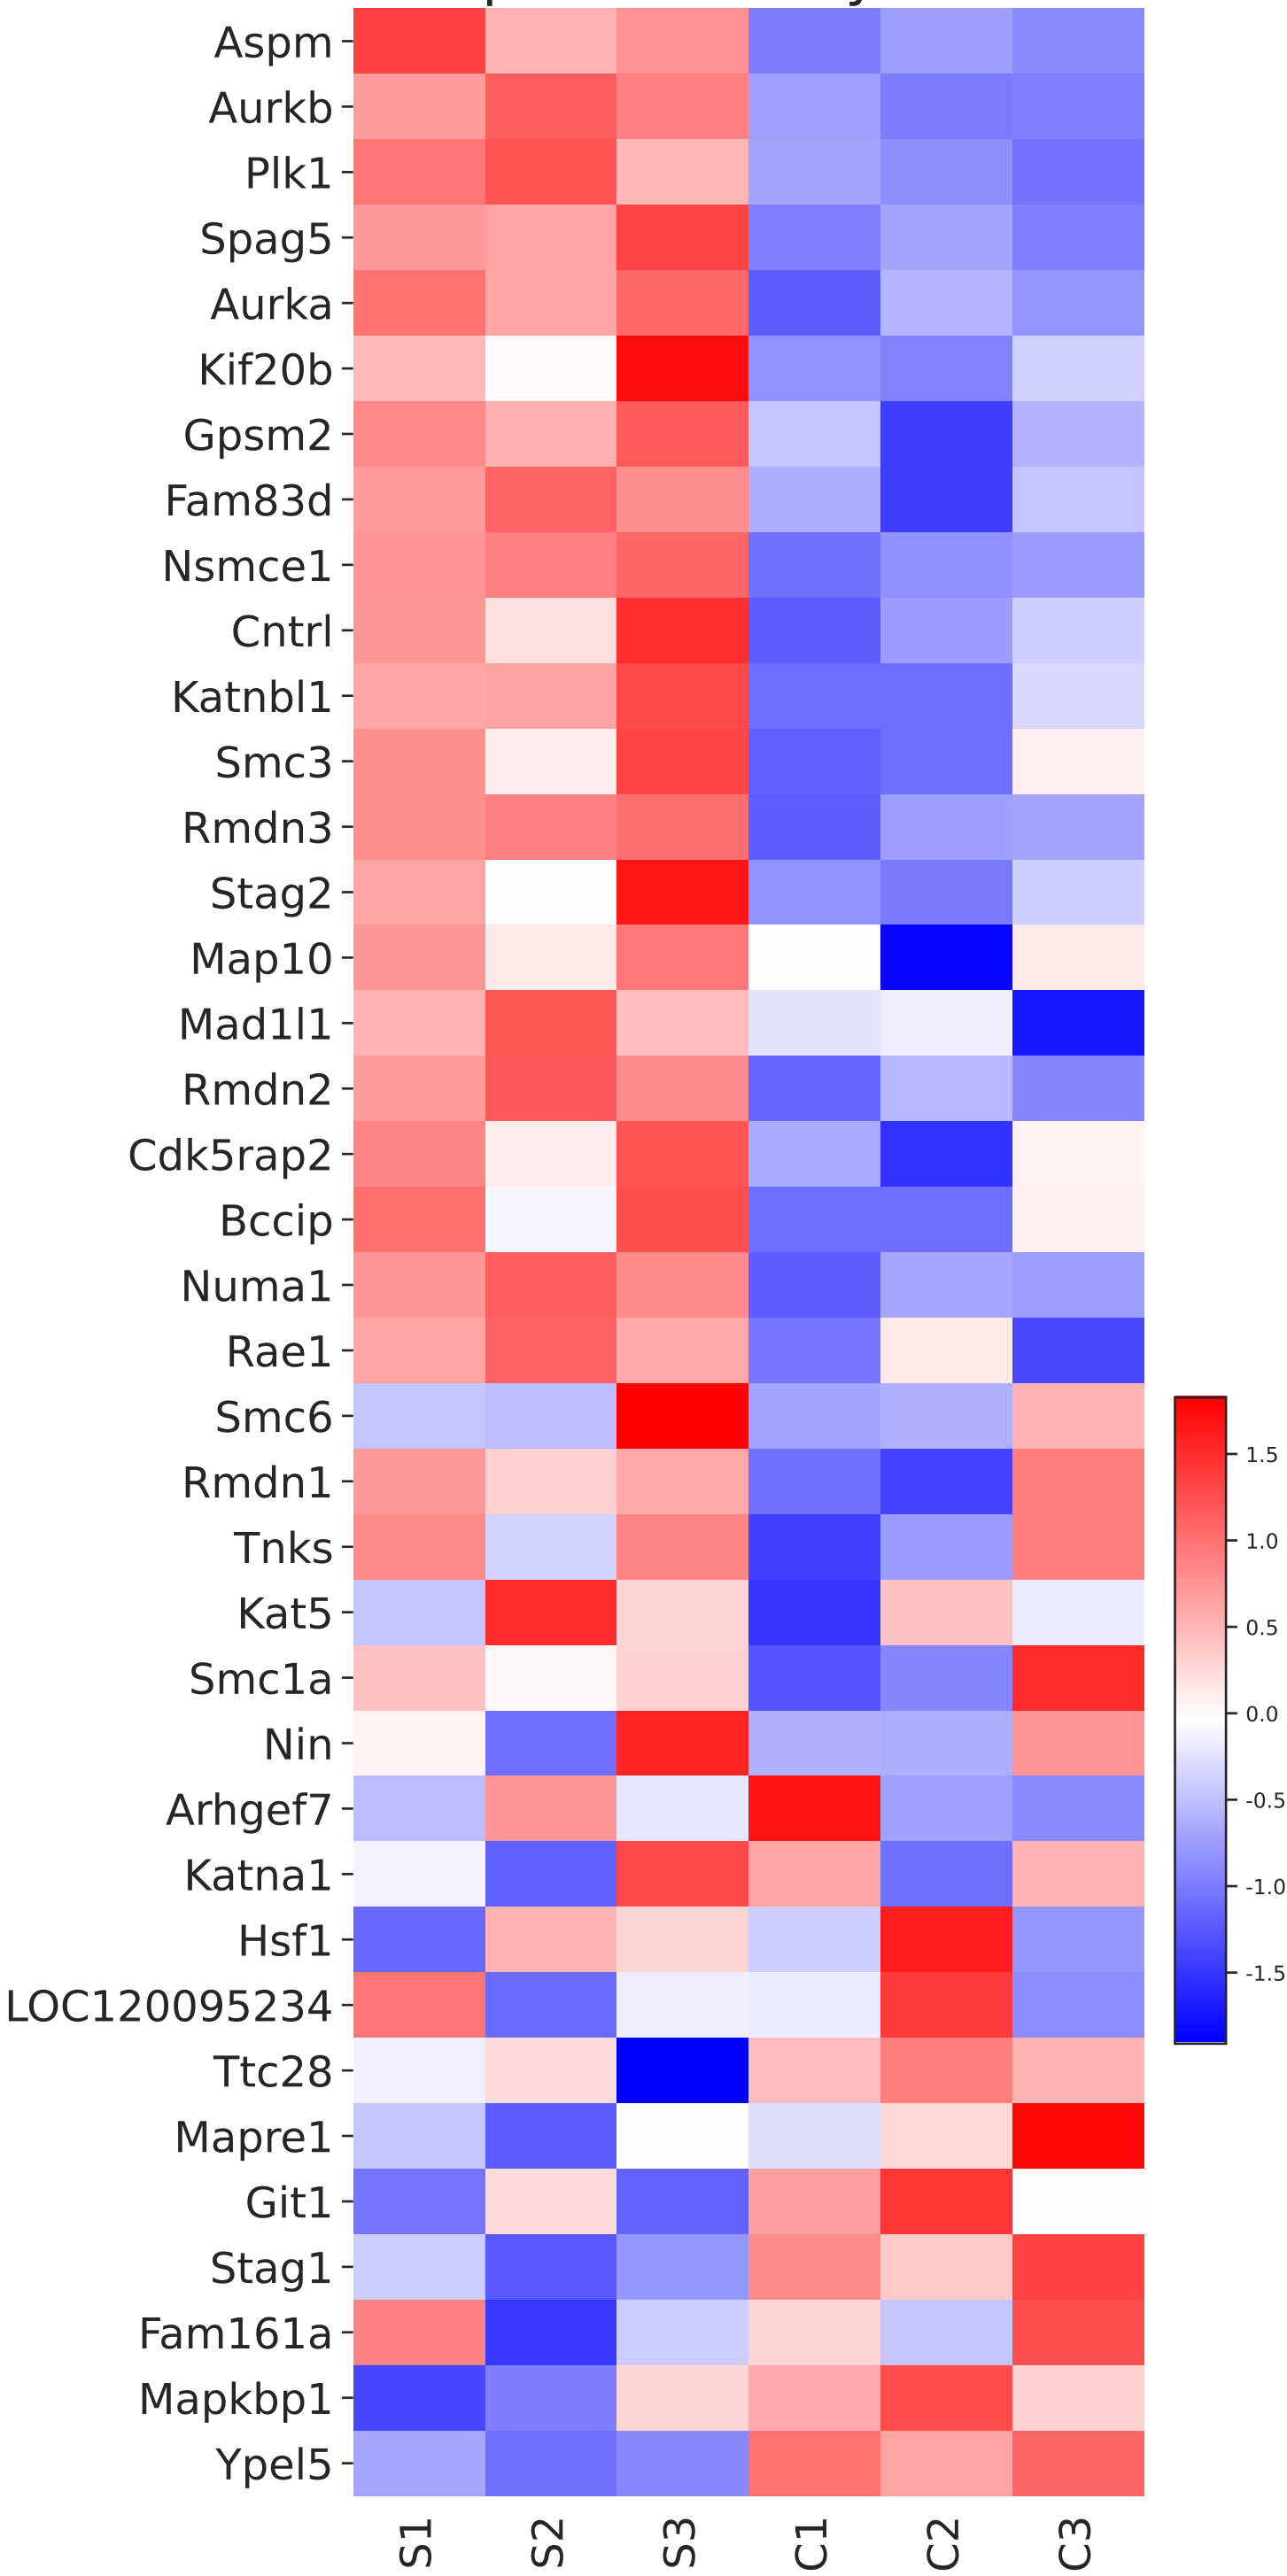

Supplement: Supplementary file 88 [file 7_mitotic spindle pole(GO_0097431).heatmap.pdf › Source data/1.RNA-Seq source data/1.BMSCs/result/1.6.GSEA/S-vs-C/go/CC/7_mitotic spindle pole(GO_0097431).heatmap.pdf]

# mitochondrial respiratory chain complex I(GO:0005747)

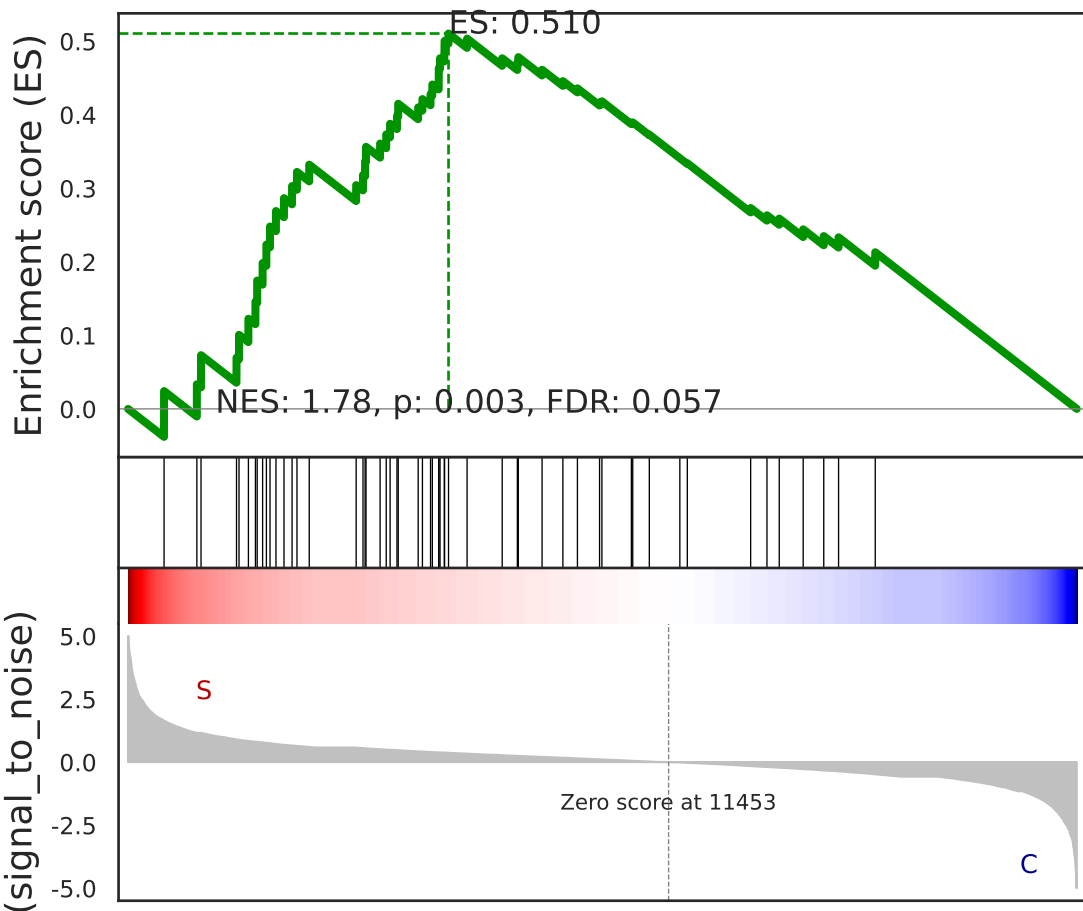

Supplement: Supplementary file 89 [file 8_mitochondrial respiratory chain complex I(GO_0005747).gsea.pdf › Source data/1.RNA-Seq source data/1.BMSCs/result/1.6.GSEA/S-vs-C/go/CC/8_mitochondrial respiratory chain complex I(GO_0005747).gsea.pdf]

# mitochondrial respiratory chain complex I(GO:0005747)

## Heatmap of the Analyzed GeneSet

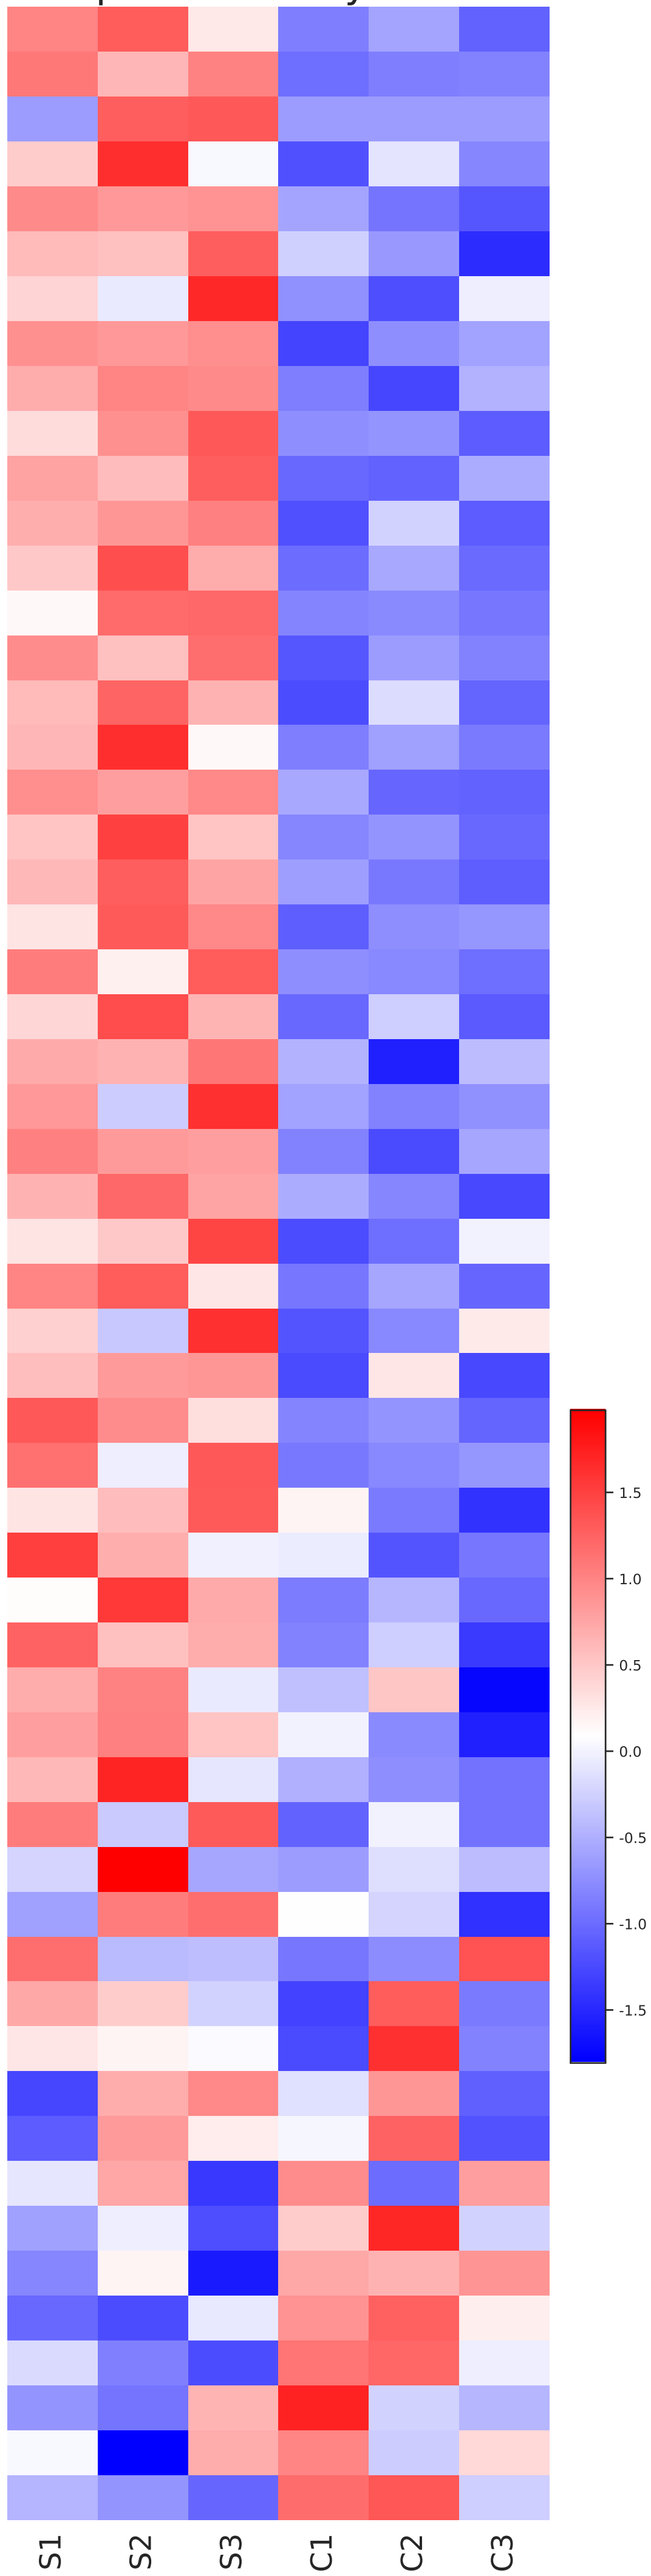

Supplement: Supplementary file 90 [file 8_mitochondrial respiratory chain complex I(GO_0005747).heatmap.pdf › Source data/1.RNA-Seq source data/1.BMSCs/result/1.6.GSEA/S-vs-C/go/CC/8_mitochondrial respiratory chain complex I(GO_0005747).heatmap.pdf]

# presynaptic active zone cytoplasmic component(GO:0098831)

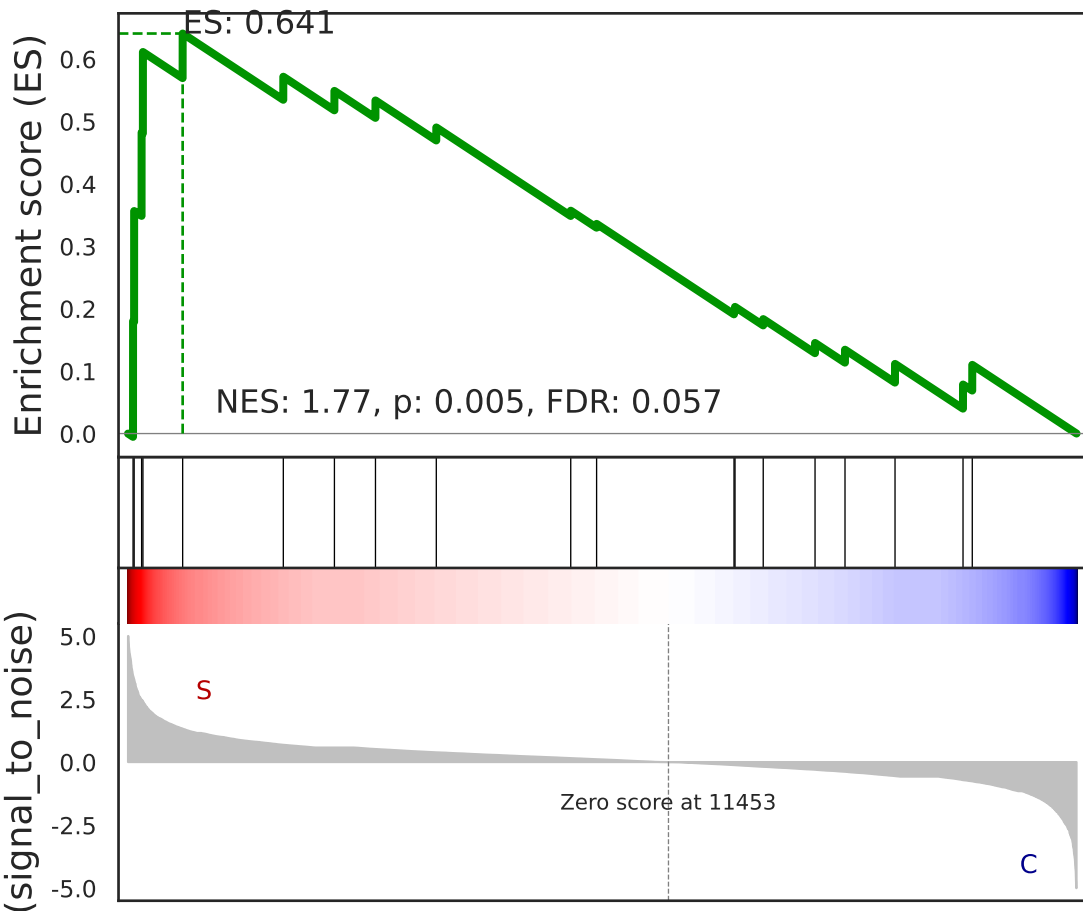

Supplement: Supplementary file 91 [file 9_presynaptic active zone cytoplasmic component(GO_0098831).gsea.pdf › Source data/1.RNA-Seq source data/1.BMSCs/result/1.6.GSEA/S-vs-C/go/CC/9_presynaptic active zone cytoplasmic component(GO_0098831).gsea.pdf]

presynaptic active zone cytoplasmic component(GO:0098831)  
Heatmap of the Analyzed GeneSet

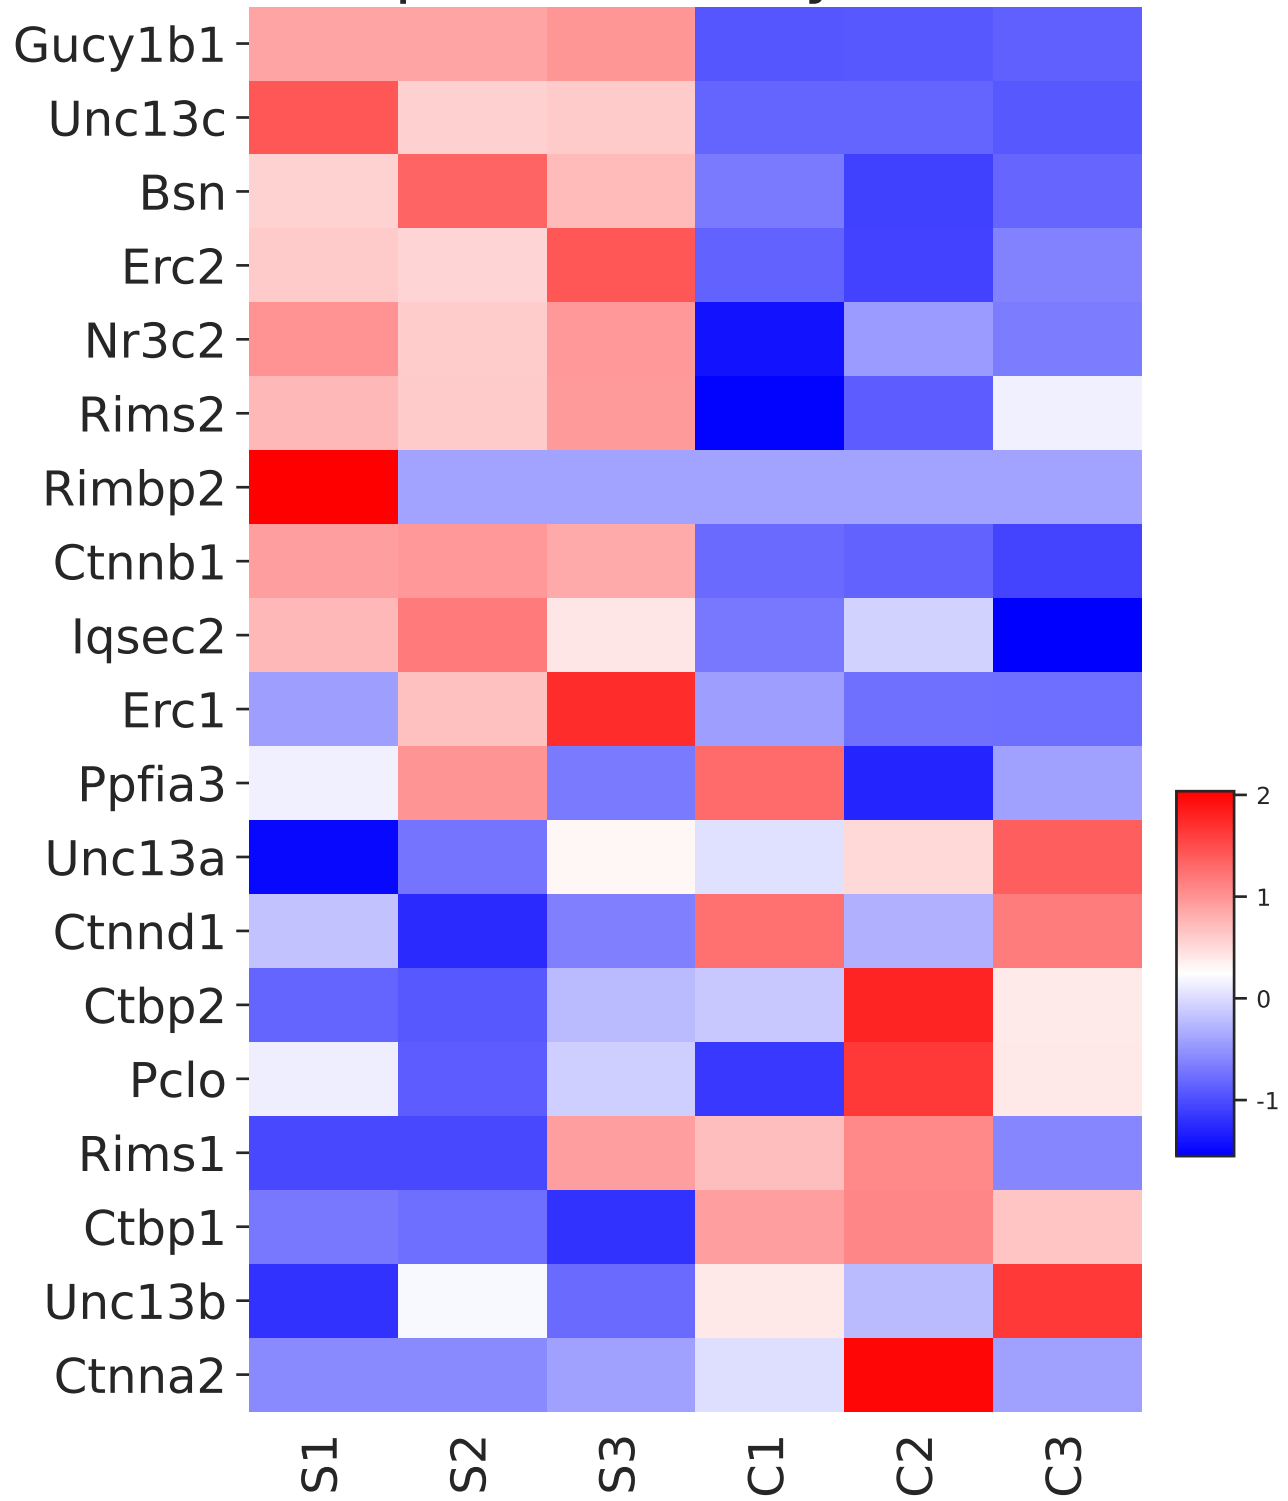

Supplement: Supplementary file 92 [file 9_presynaptic active zone cytoplasmic component(GO_0098831).heatmap.pdf › Source data/1.RNA-Seq source data/1.BMSCs/result/1.6.GSEA/S-vs-C/go/CC/9_presynaptic active zone cytoplasmic component(GO_0098831).heatmap.pdf]

# nucleotide binding(GO:0000166)

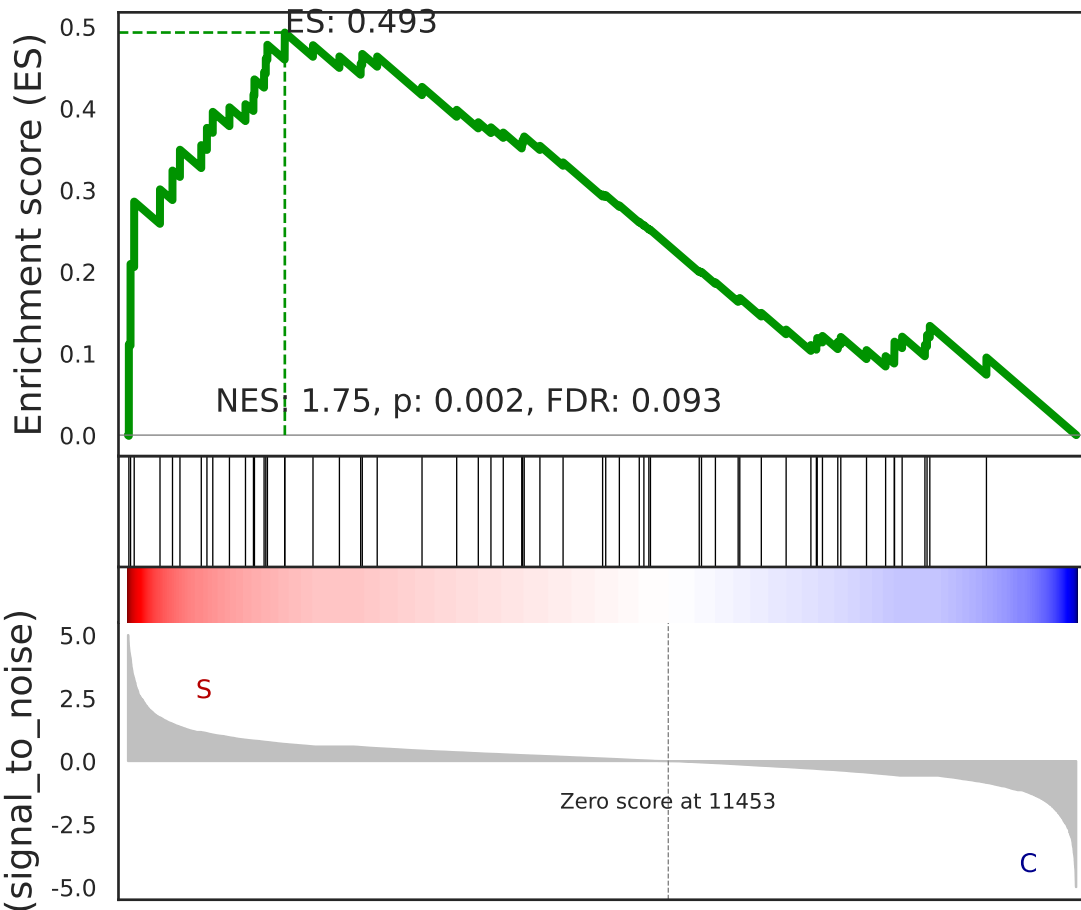

Supplement: Supplementary file 93 [file 10_nucleotide binding(GO_0000166).gsea.pdf › Source data/1.RNA-Seq source data/1.BMSCs/result/1.6.GSEA/S-vs-C/go/MF/10_nucleotide binding(GO_0000166).gsea.pdf]

nucleotide binding(GO:0000166)  
Heatmap of the Analyzed GeneSet

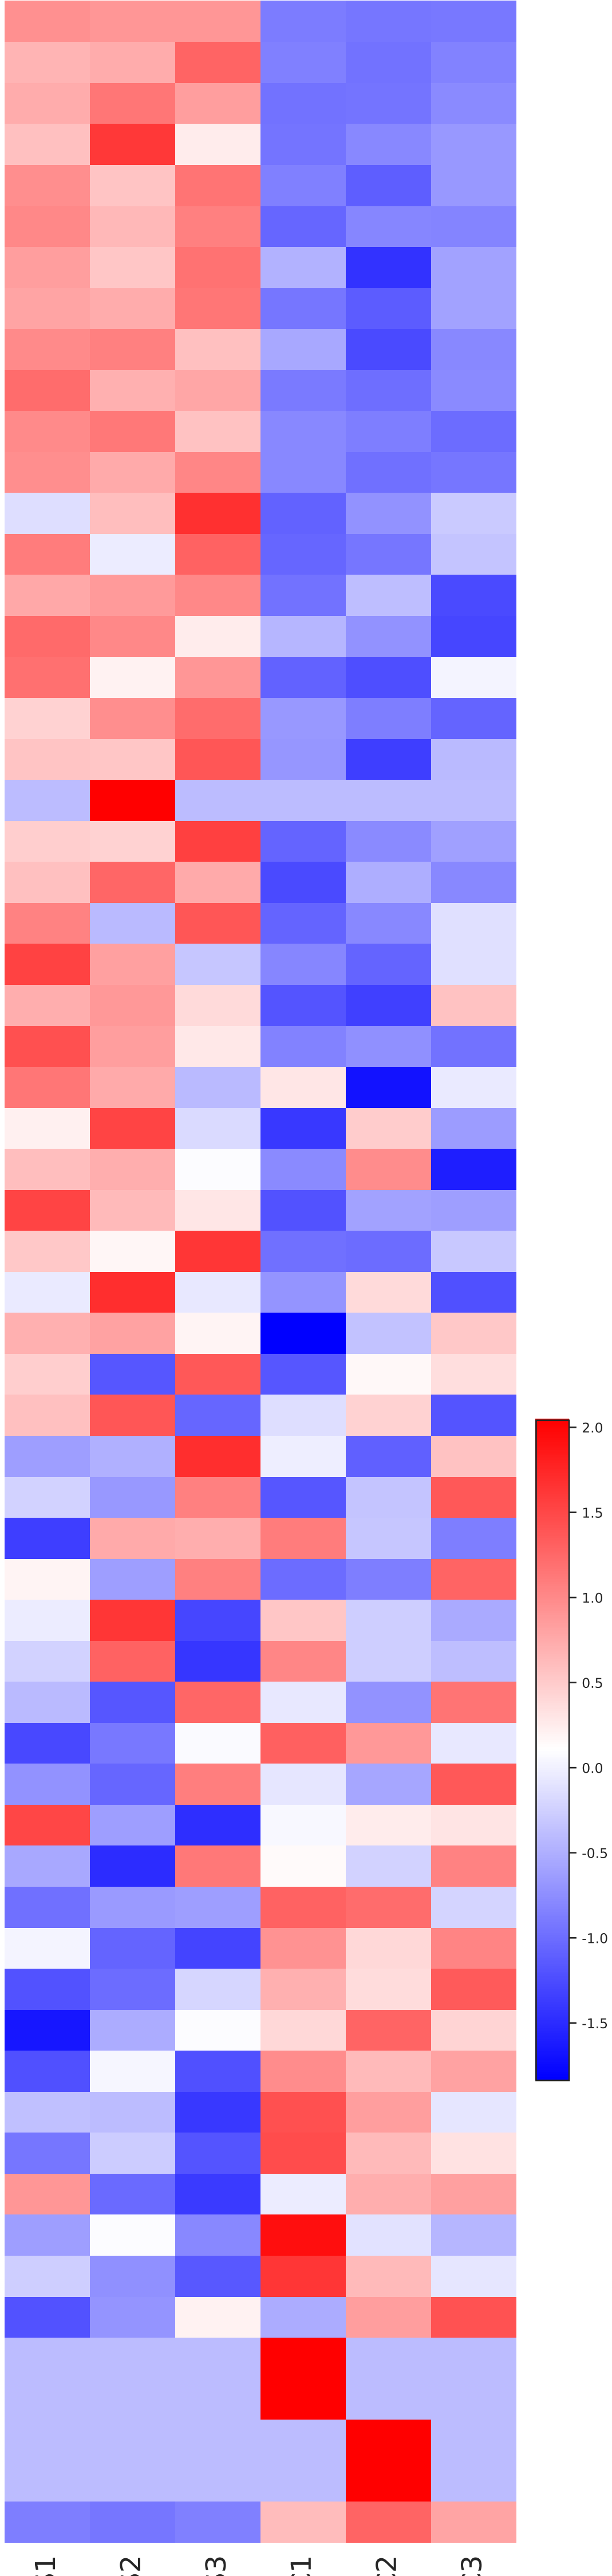

Supplement: Supplementary file 94 [file 10_nucleotide binding(GO_0000166).heatmap.pdf › Source data/1.RNA-Seq source data/1.BMSCs/result/1.6.GSEA/S-vs-C/go/MF/10_nucleotide binding(GO_0000166).heatmap.pdf]

# ferric iron binding(GO:0008199)

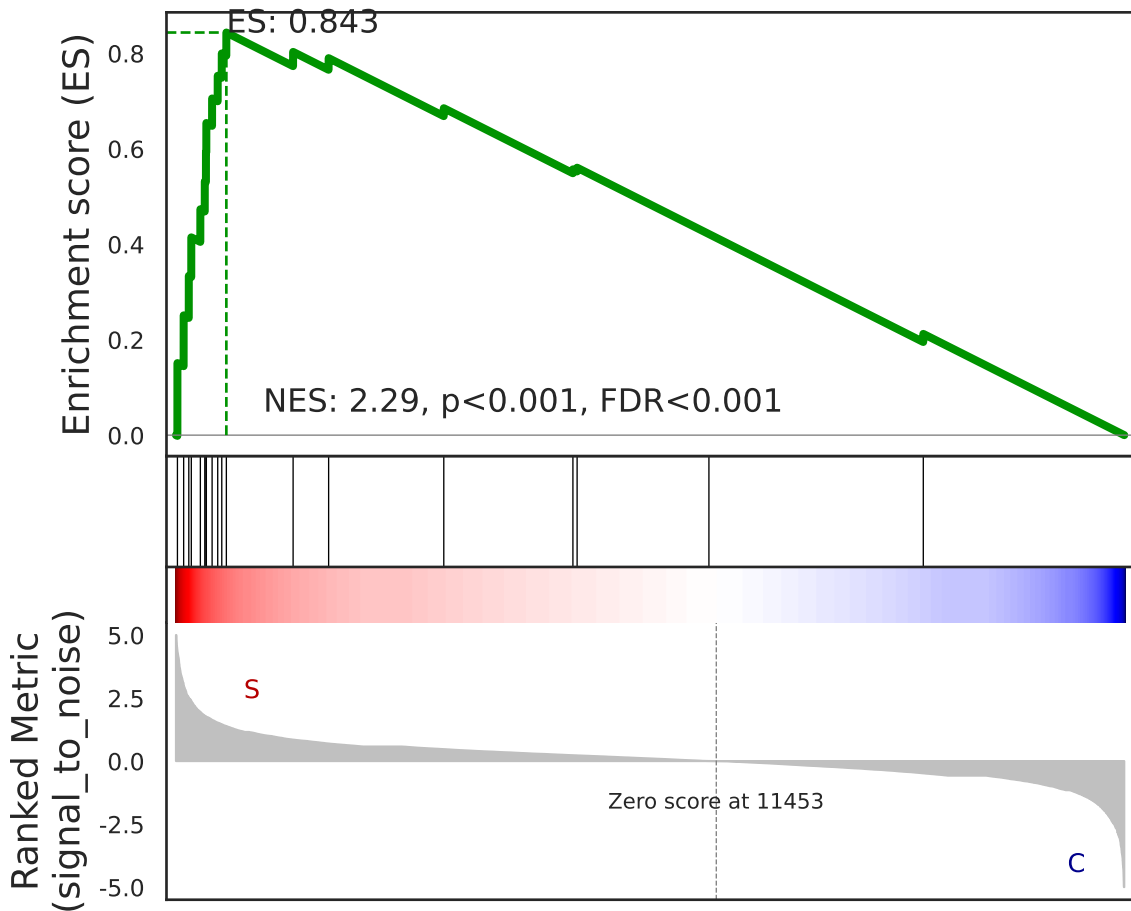

Supplement: Supplementary file 95 [file 1_ferric iron binding(GO_0008199).gsea.pdf › Source data/1.RNA-Seq source data/1.BMSCs/result/1.6.GSEA/S-vs-C/go/MF/1_ferric iron binding(GO_0008199).gsea.pdf]

# ferric iron binding(GO:0008199)

## Heatmap of the Analyzed GeneSet

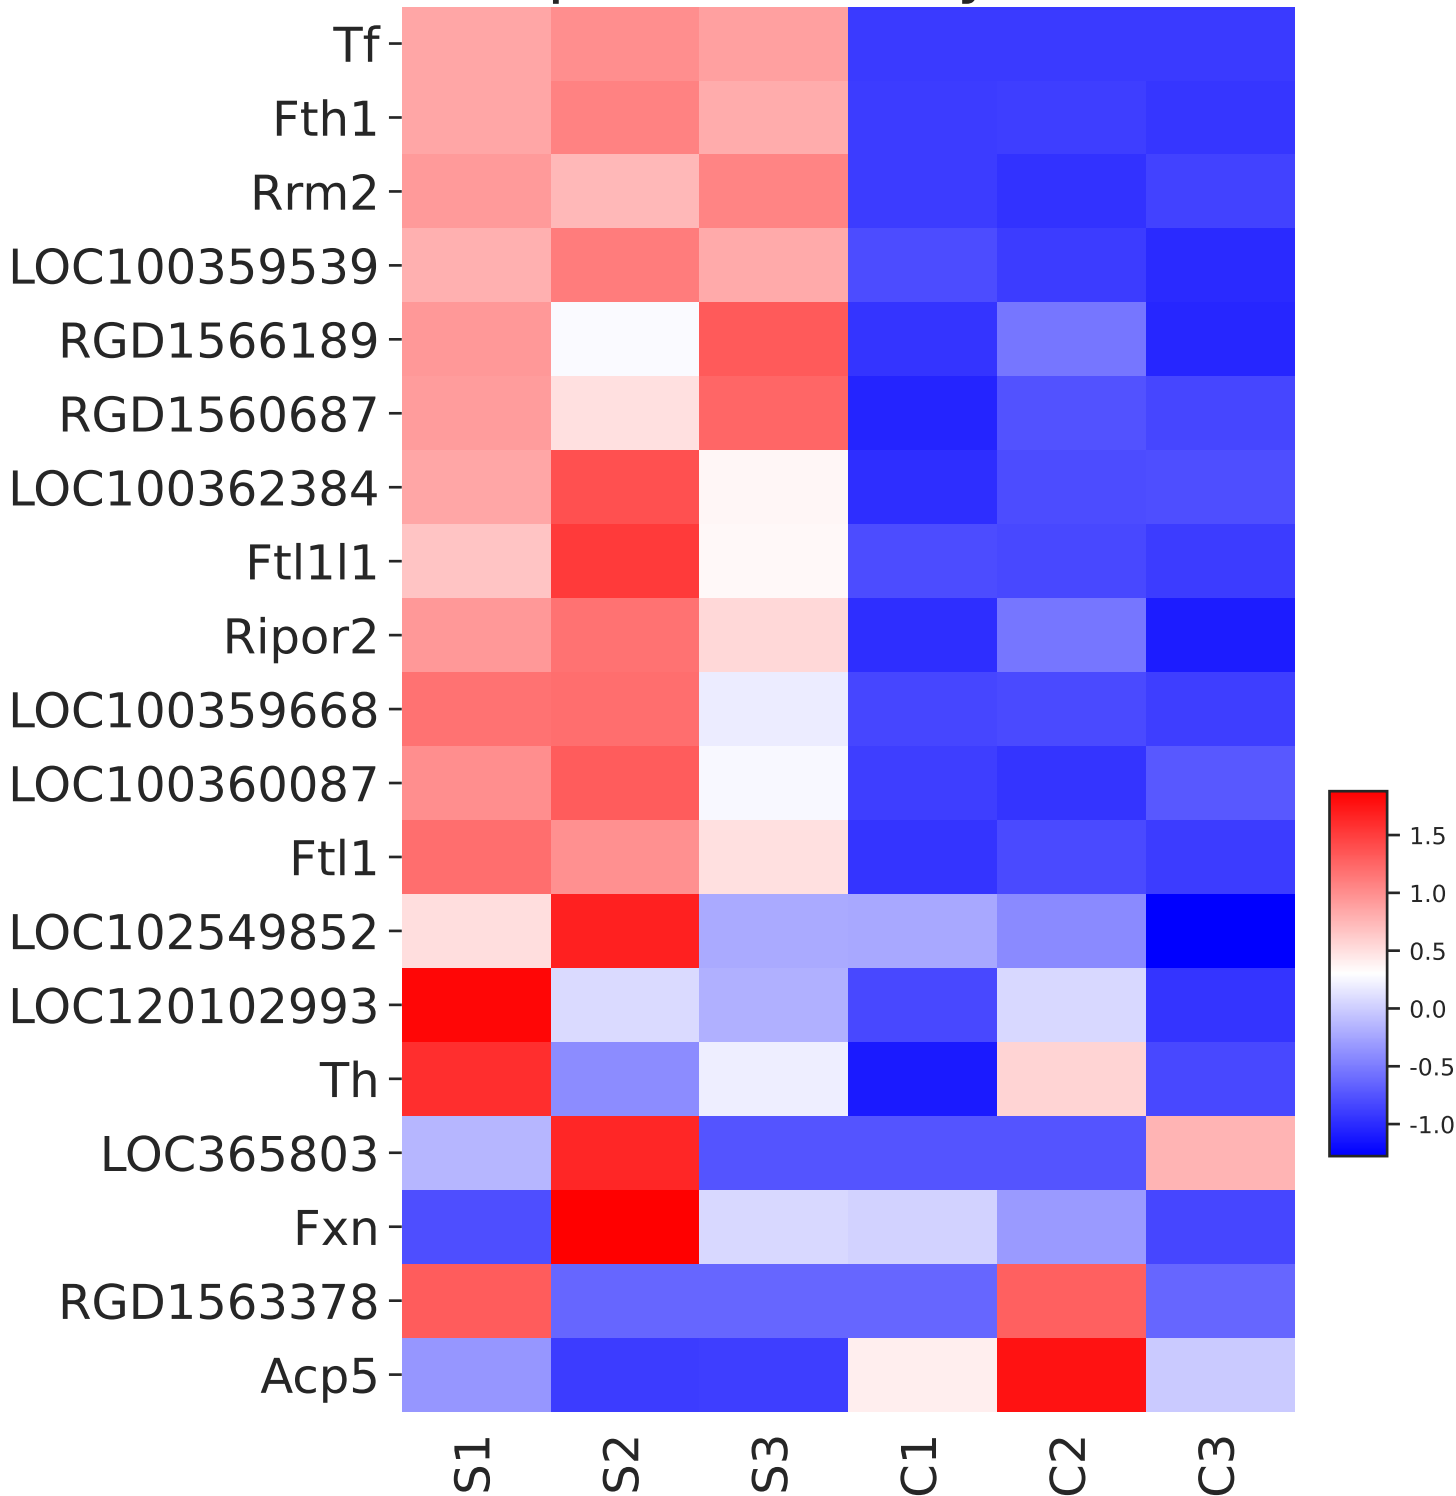

Supplement: Supplementary file 96 [file 1_ferric iron binding(GO_0008199).heatmap.pdf › Source data/1.RNA-Seq source data/1.BMSCs/result/1.6.GSEA/S-vs-C/go/MF/1_ferric iron binding(GO_0008199).heatmap.pdf]

# glutathione transferase activity(GO:0004364)

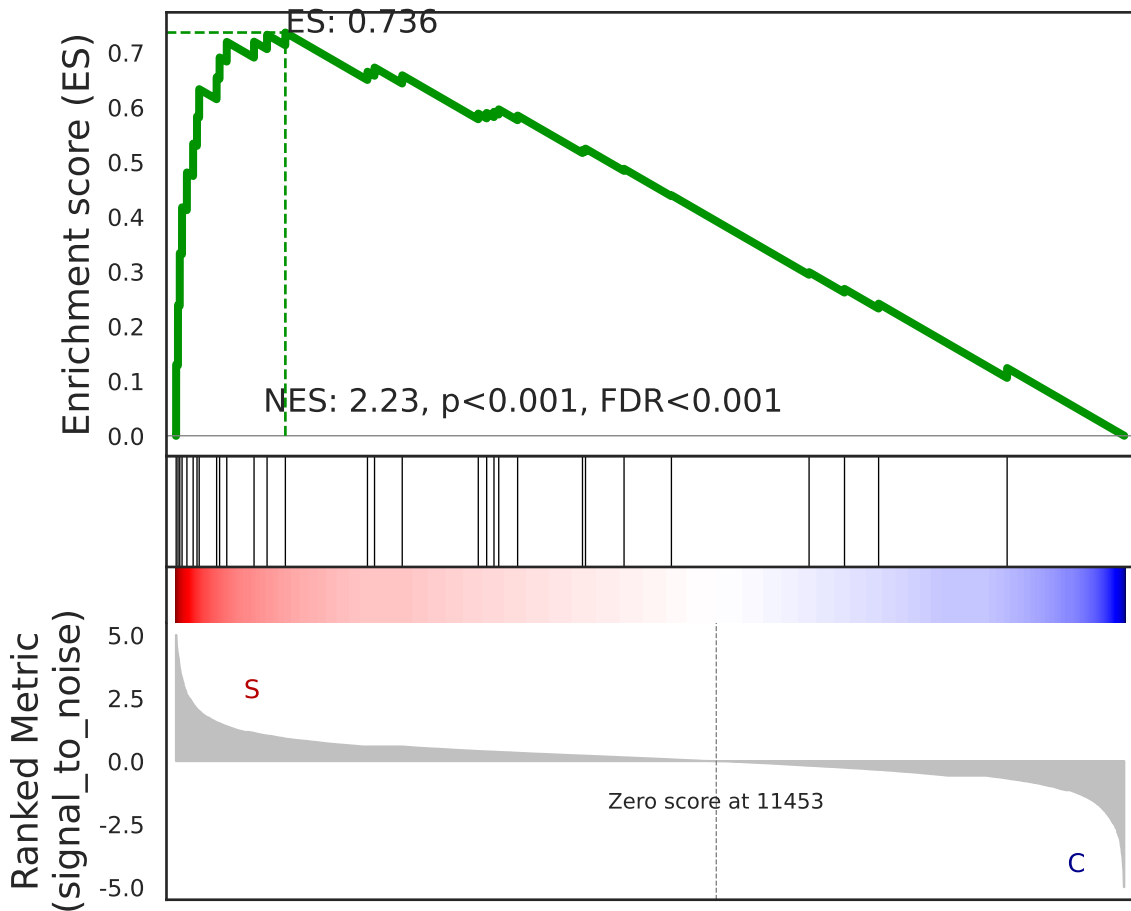

Supplement: Supplementary file 97 [file 2_glutathione transferase activity(GO_0004364).gsea.pdf › Source data/1.RNA-Seq source data/1.BMSCs/result/1.6.GSEA/S-vs-C/go/MF/2_glutathione transferase activity(GO_0004364).gsea.pdf]

glutathione transferase activity(GO:0004364)  
Heatmap of the Analyzed GeneSet

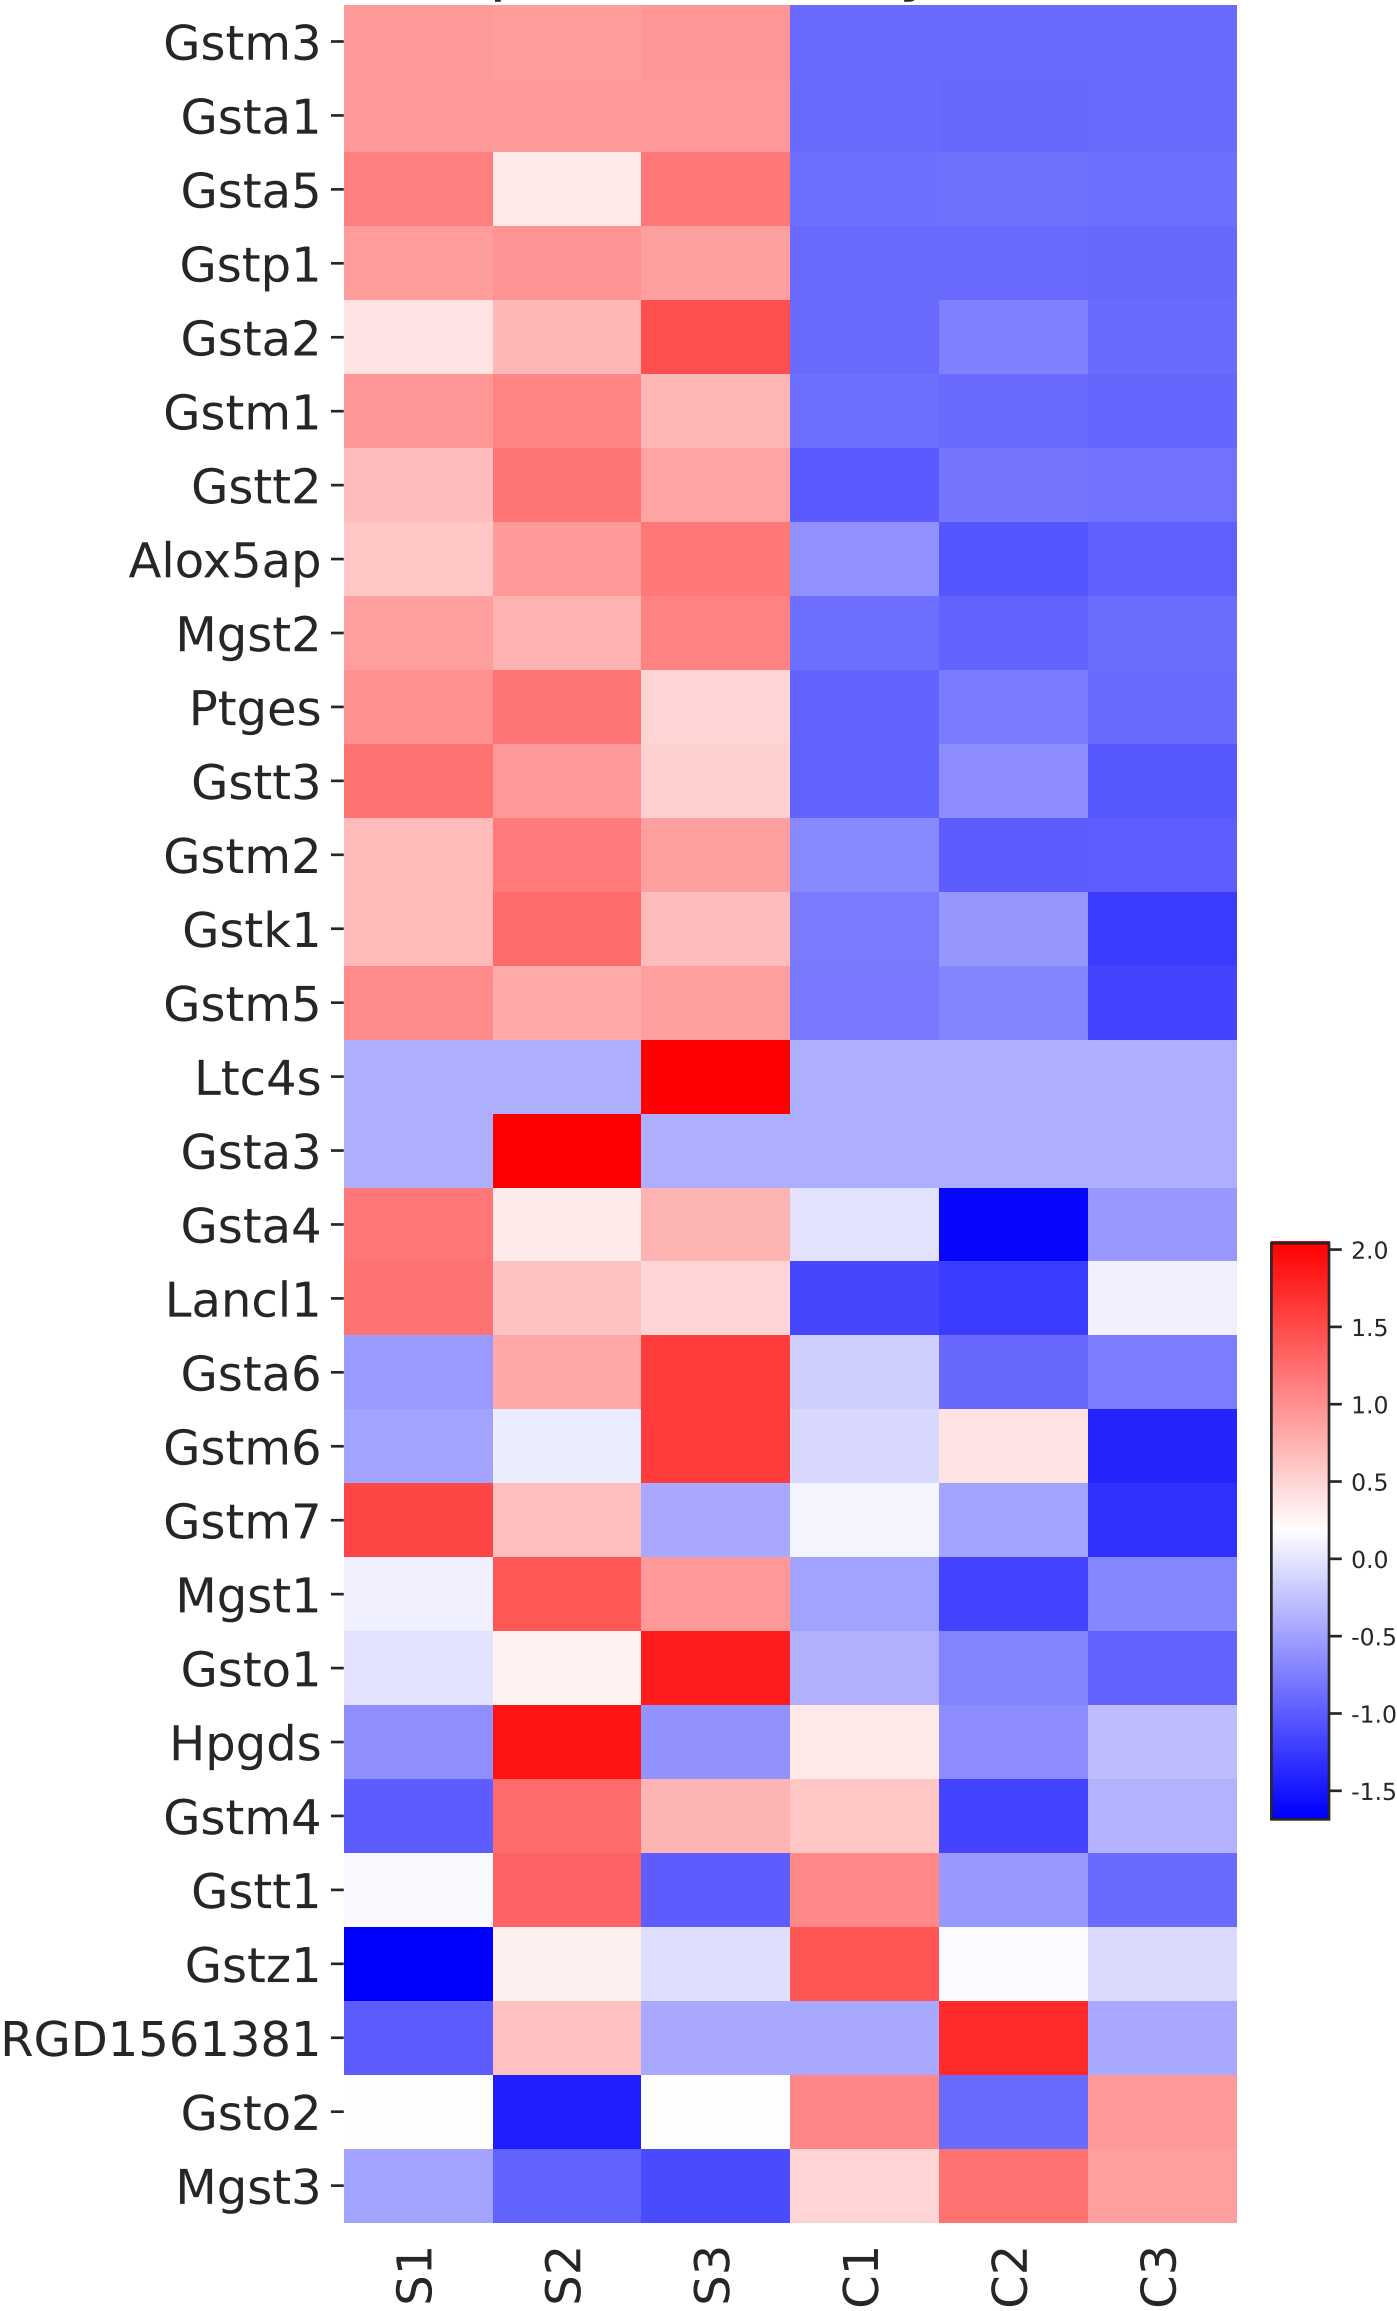

Supplement: Supplementary file 98 [file 2_glutathione transferase activity(GO_0004364).heatmap.pdf › Source data/1.RNA-Seq source data/1.BMSCs/result/1.6.GSEA/S-vs-C/go/MF/2_glutathione transferase activity(GO_0004364).heatmap.pdf]

# glutathione binding(GO:0043295)

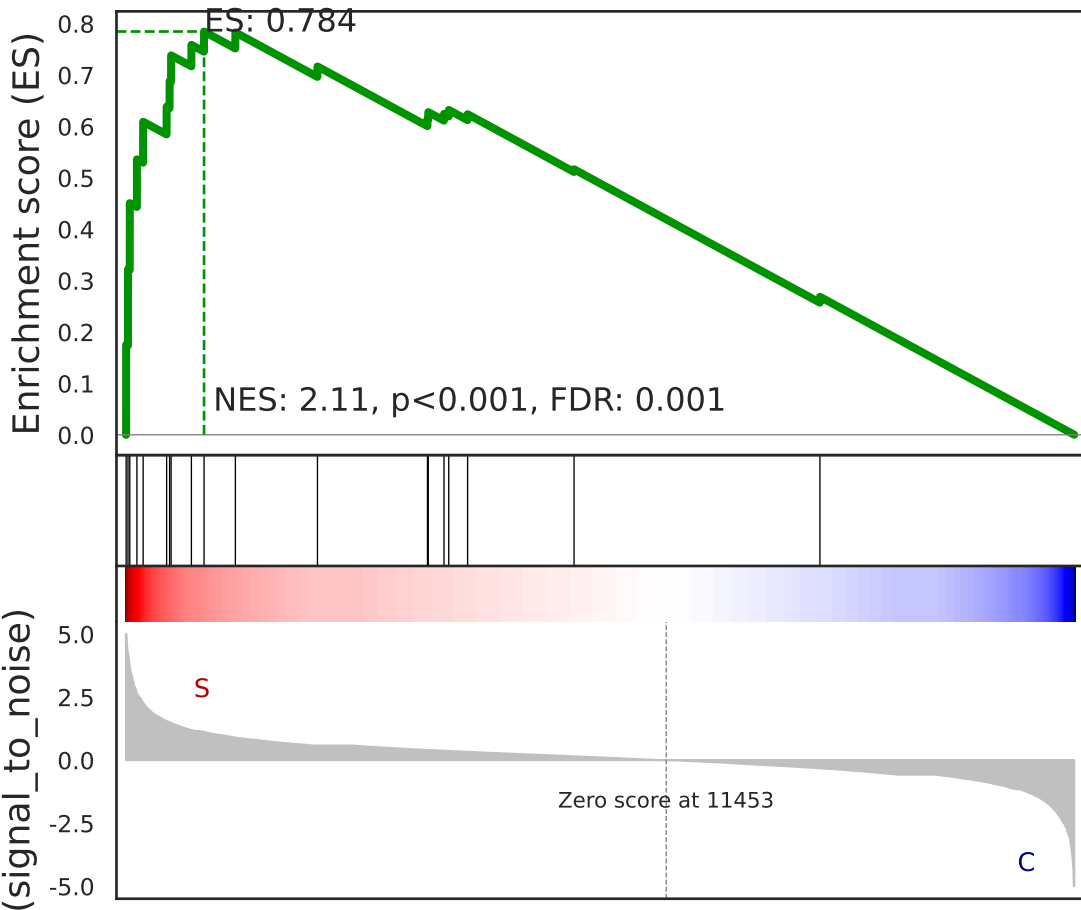

Supplement: Supplementary file 99 [file 3_glutathione binding(GO_0043295).gsea.pdf › Source data/1.RNA-Seq source data/1.BMSCs/result/1.6.GSEA/S-vs-C/go/MF/3_glutathione binding(GO_0043295).gsea.pdf]

# glutathione binding(GO:0043295)

## Heatmap of the Analyzed GeneSet

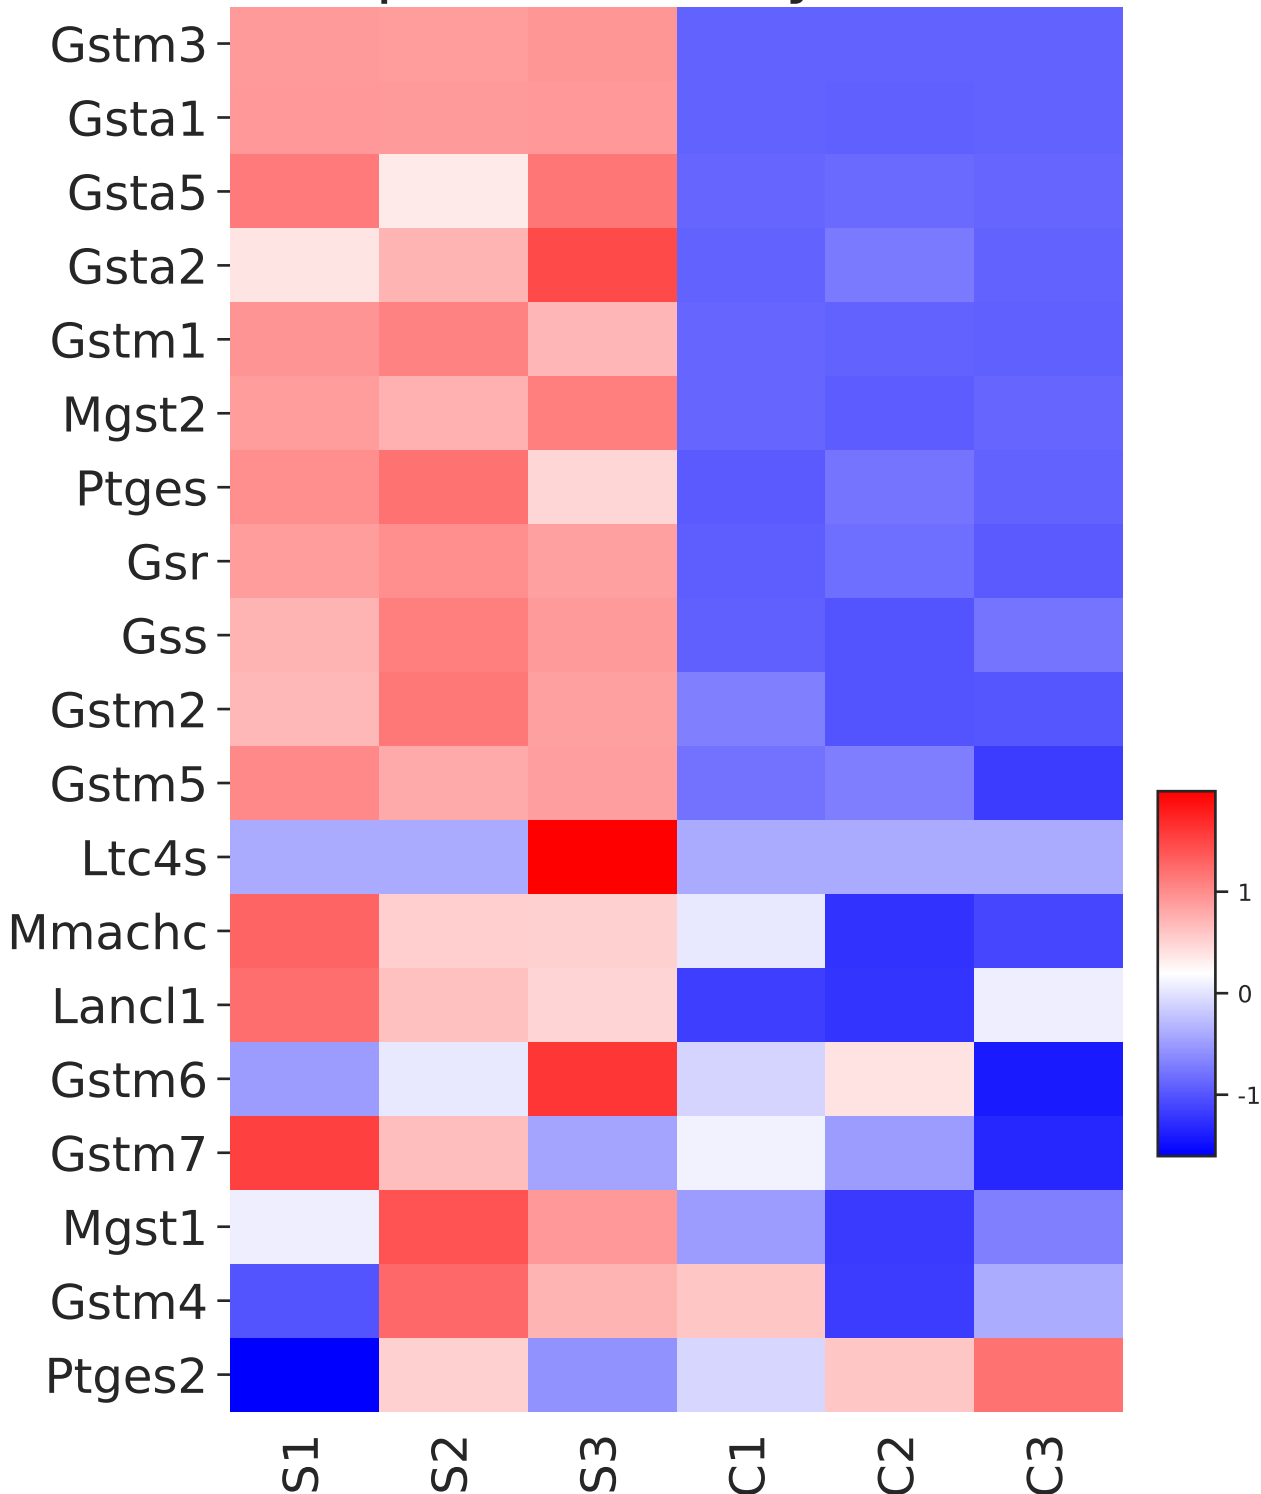

Supplement: Supplementary file 100 [file 3_glutathione binding(GO_0043295).heatmap.pdf › Source data/1.RNA-Seq source data/1.BMSCs/result/1.6.GSEA/S-vs-C/go/MF/3_glutathione binding(GO_0043295).heatmap.pdf]

# glutathione peroxidase activity(GO:0004602)

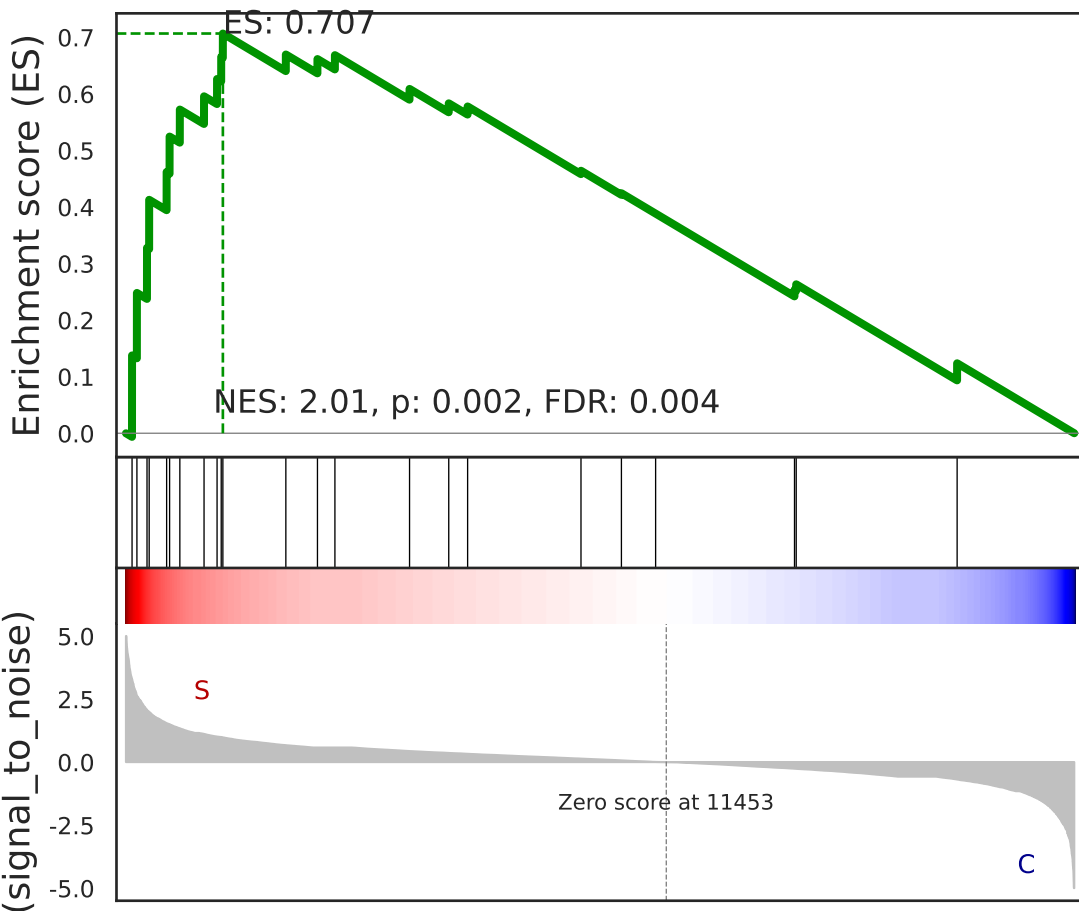

Supplement: Supplementary file 101 [file 4_glutathione peroxidase activity(GO_0004602).gsea.pdf › Source data/1.RNA-Seq source data/1.BMSCs/result/1.6.GSEA/S-vs-C/go/MF/4_glutathione peroxidase activity(GO_0004602).gsea.pdf]
