# Supplementary figures and images for: Peptide-based Self-adaptive Implant Coating Sequentially Regulates Bone Regeneration to Enhance Interfacial Osseointegration (part 2 of 6)
Source: Research Square preprint supplement (doi:10.21203/rs.3.rs-5132912/v1), 2024-10-01

glutathione peroxidase activity(GO:0004602)

Heatmap of the Analyzed GeneSet

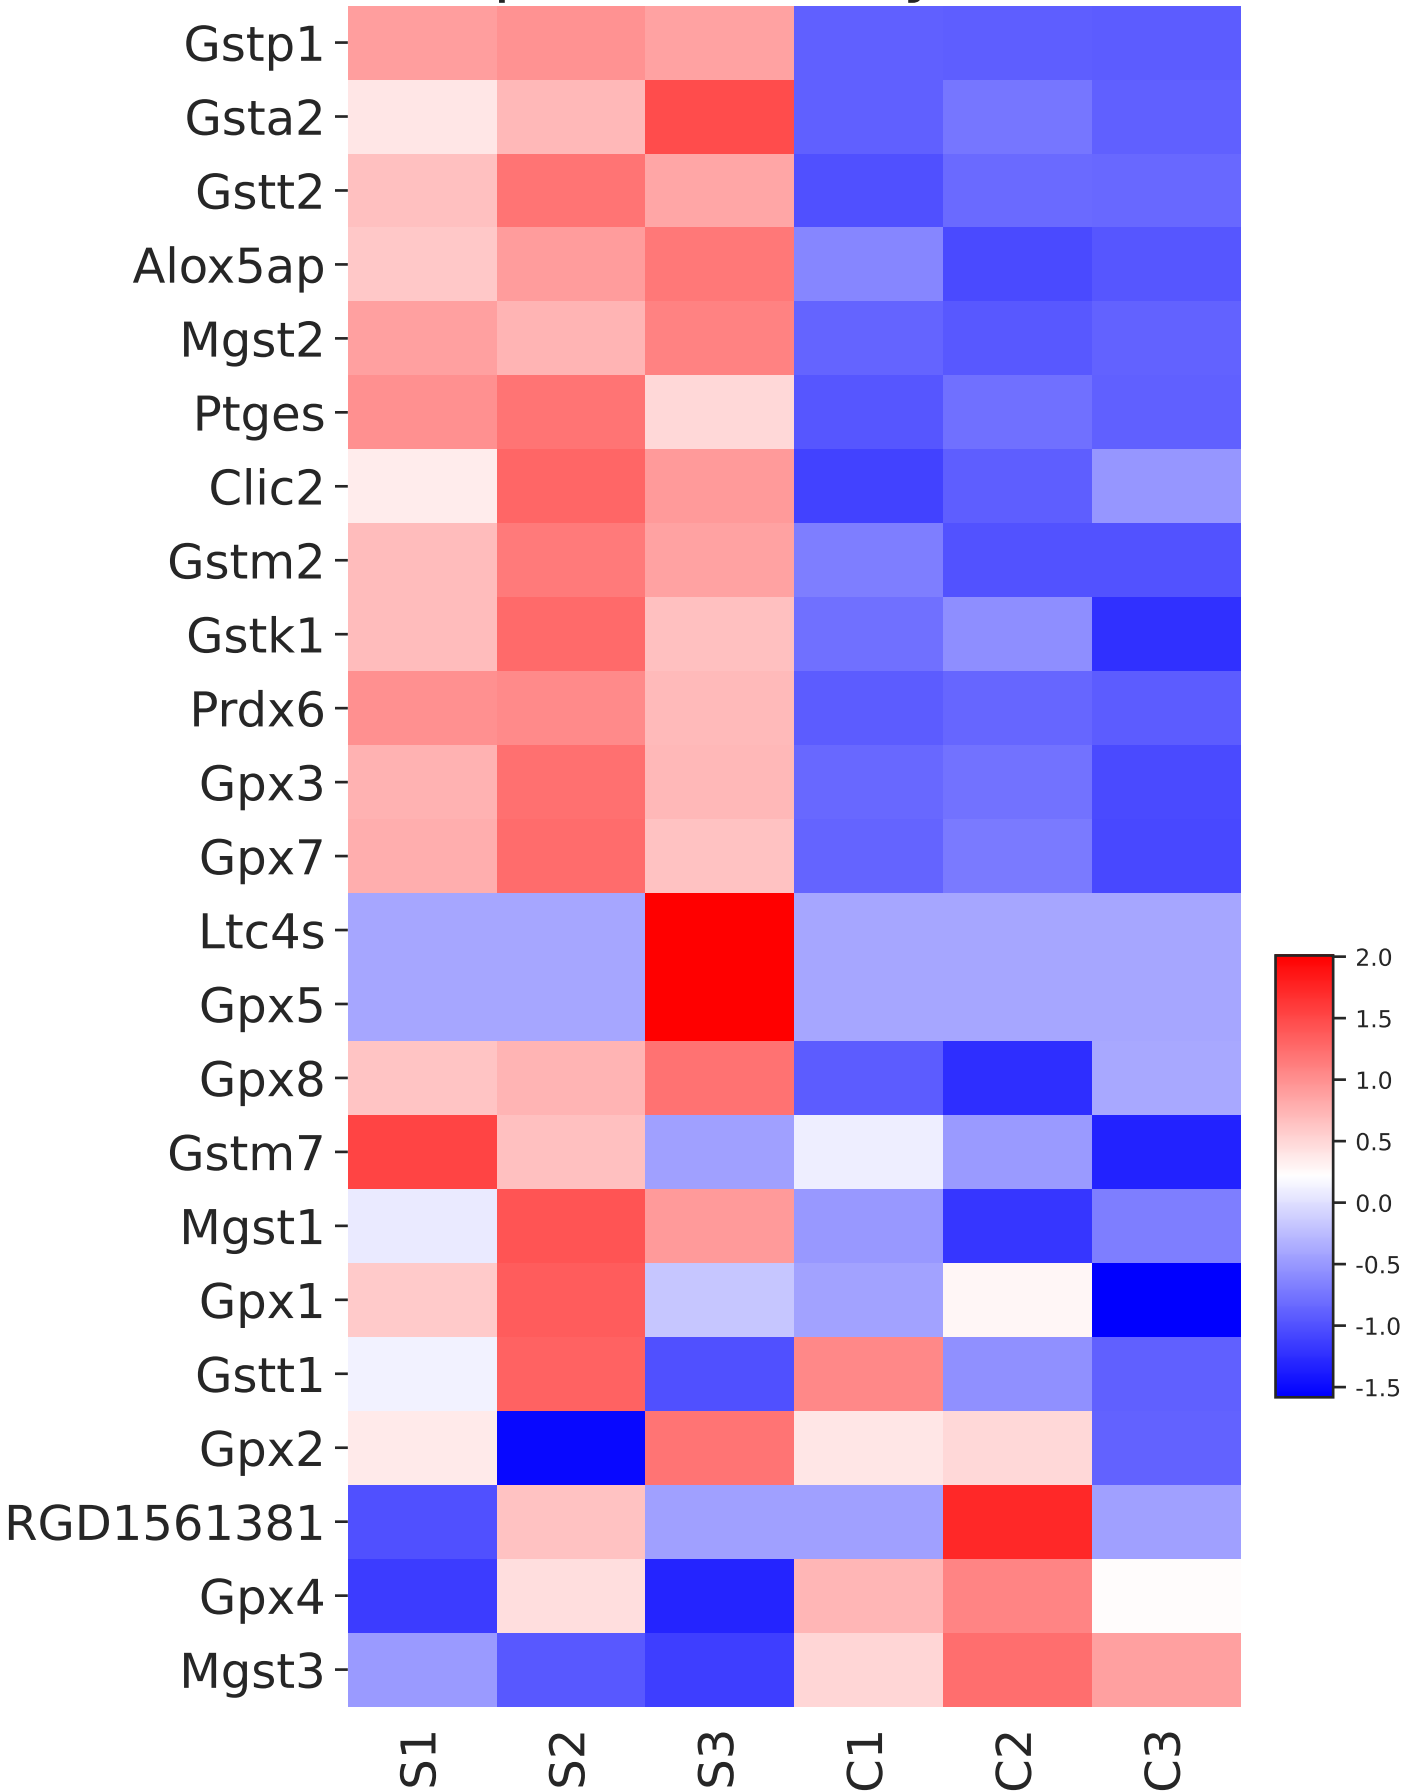

Supplement: Supplementary file 102 [file 4_glutathione peroxidase activity(GO_0004602).heatmap.pdf › Source data/1.RNA-Seq source data/1.BMSCs/result/1.6.GSEA/S-vs-C/go/MF/4_glutathione peroxidase activity(GO_0004602).heatmap.pdf]

# serine-type endopeptidase activity(GO:0004252)

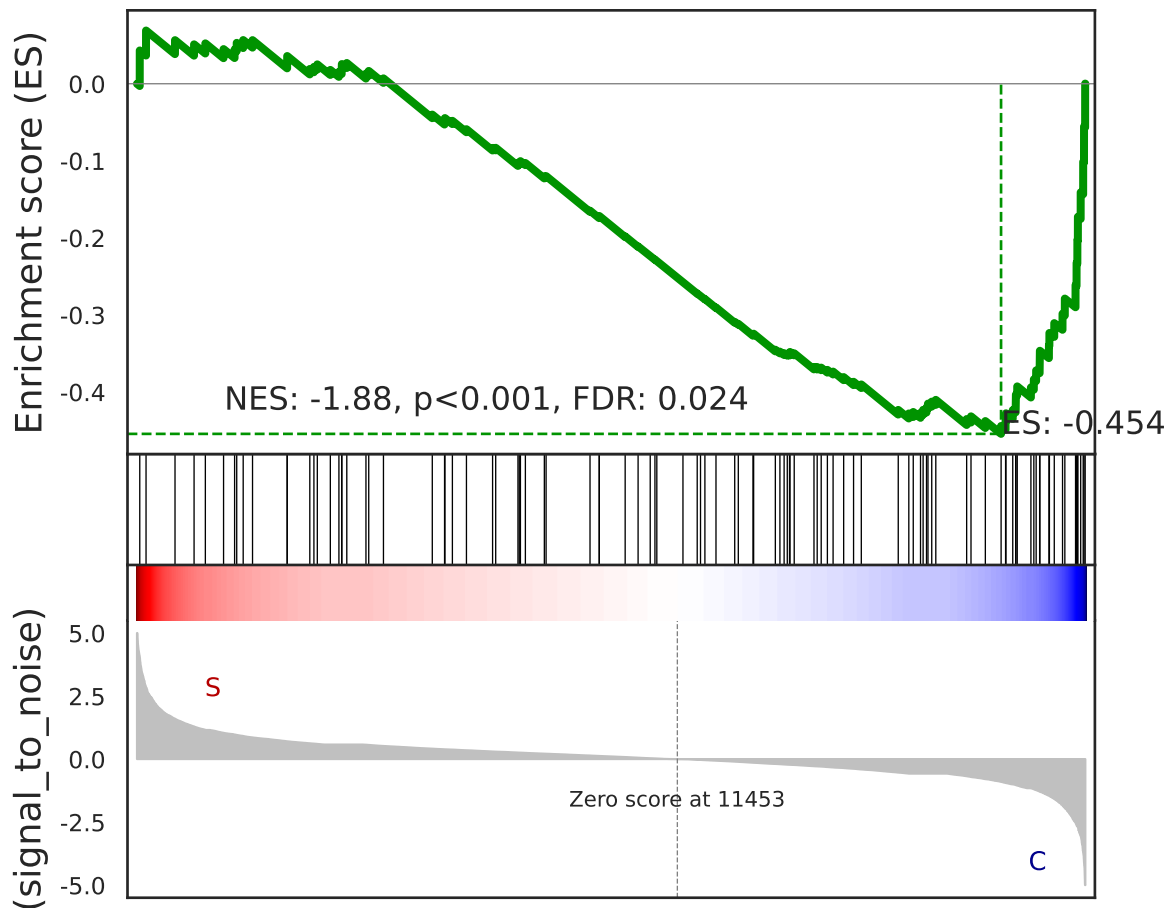

Supplement: Supplementary file 103 [file 500_serine-type endopeptidase activity(GO_0004252).gsea.pdf › Source data/1.RNA-Seq source data/1.BMSCs/result/1.6.GSEA/S-vs-C/go/MF/500_serine-type endopeptidase activity(GO_0004252).gsea.pdf]

serine-type endopeptidase activity(GO:0004252)  
Heatmap of the Analyzed GeneSet

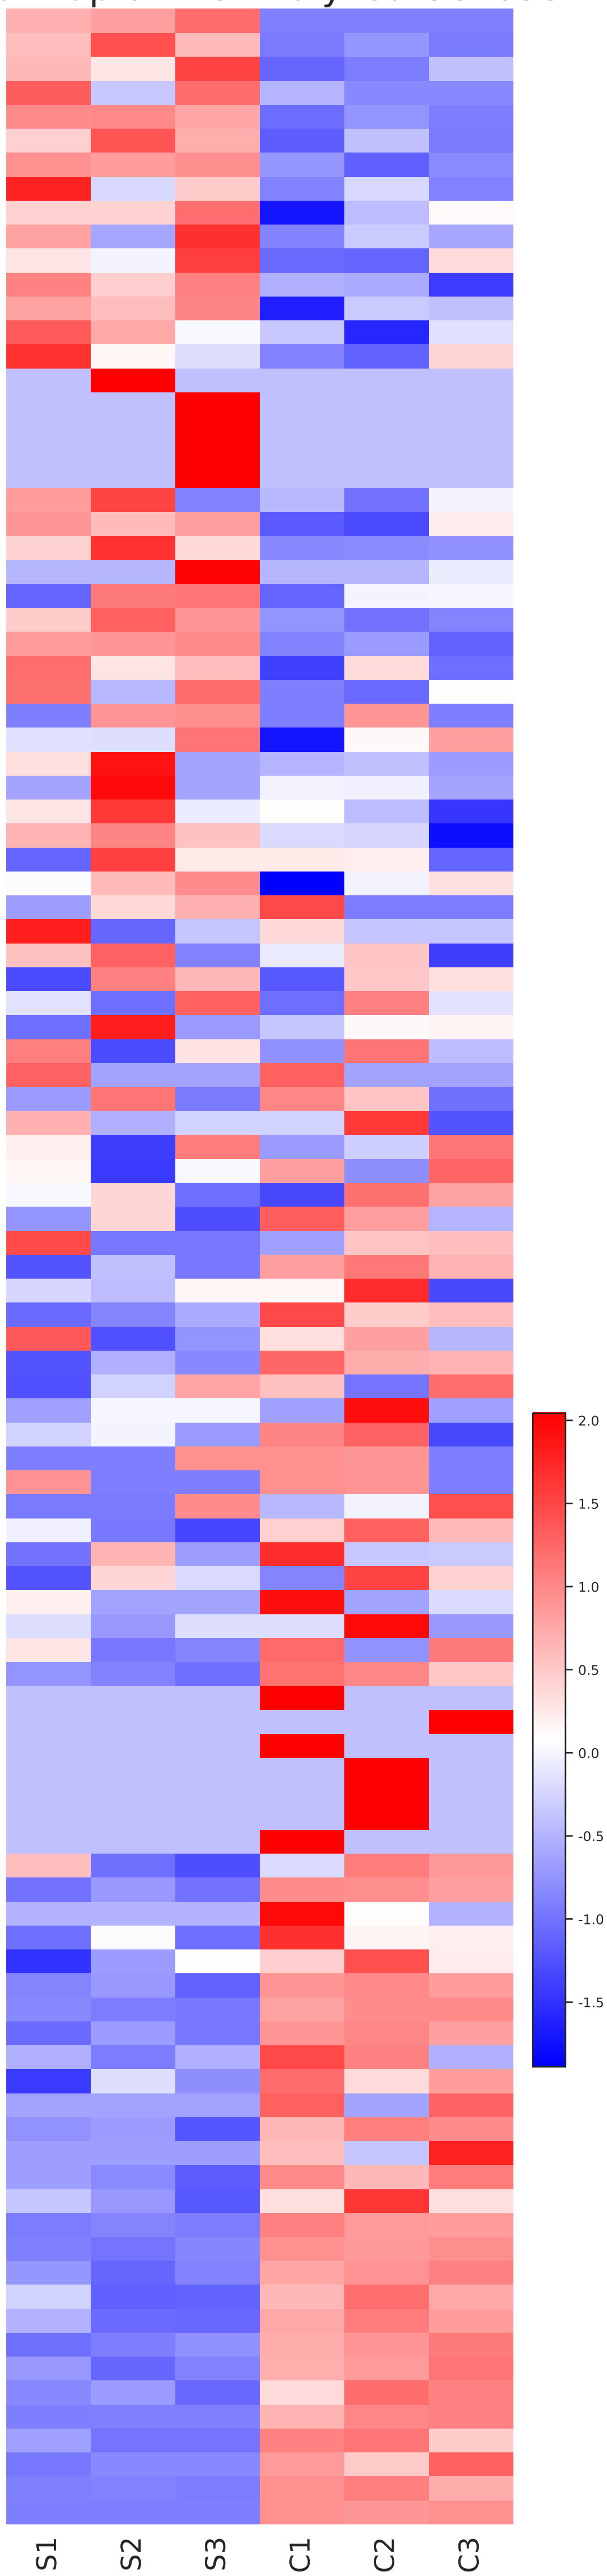

Supplement: Supplementary file 104 [file 500_serine-type endopeptidase activity(GO_0004252).heatmap.pdf › Source data/1.RNA-Seq source data/1.BMSCs/result/1.6.GSEA/S-vs-C/go/MF/500_serine-type endopeptidase activity(GO_0004252).heatmap.pdf]

# extracellular matrix structural constituent(GO:0005201)

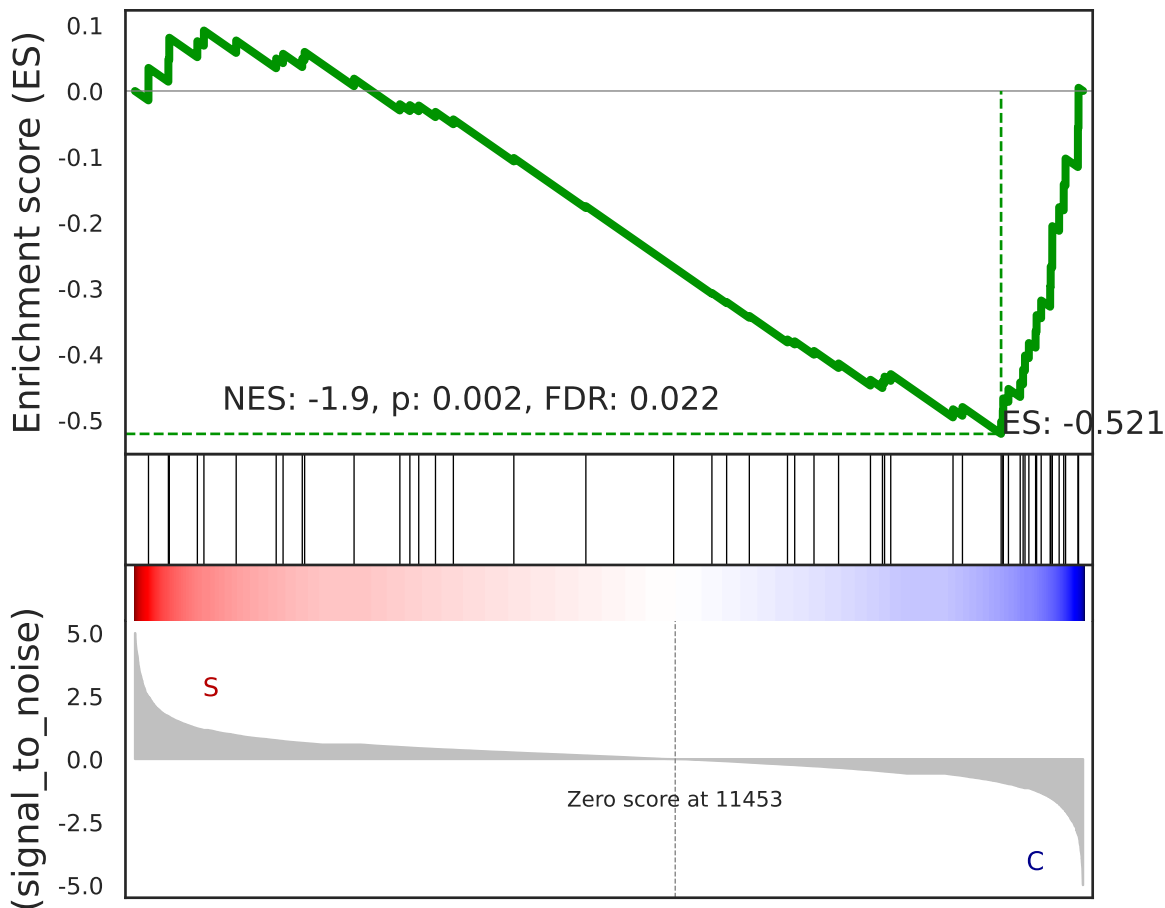

Supplement: Supplementary file 105 [file 501_extracellular matrix structural constituent(GO_0005201).gsea.pdf › Source data/1.RNA-Seq source data/1.BMSCs/result/1.6.GSEA/S-vs-C/go/MF/501_extracellular matrix structural constituent(GO_0005201).gsea.pdf]

extracellular matrix structural constituent(GO:0005201)  
Heatmap of the Analyzed GeneSet

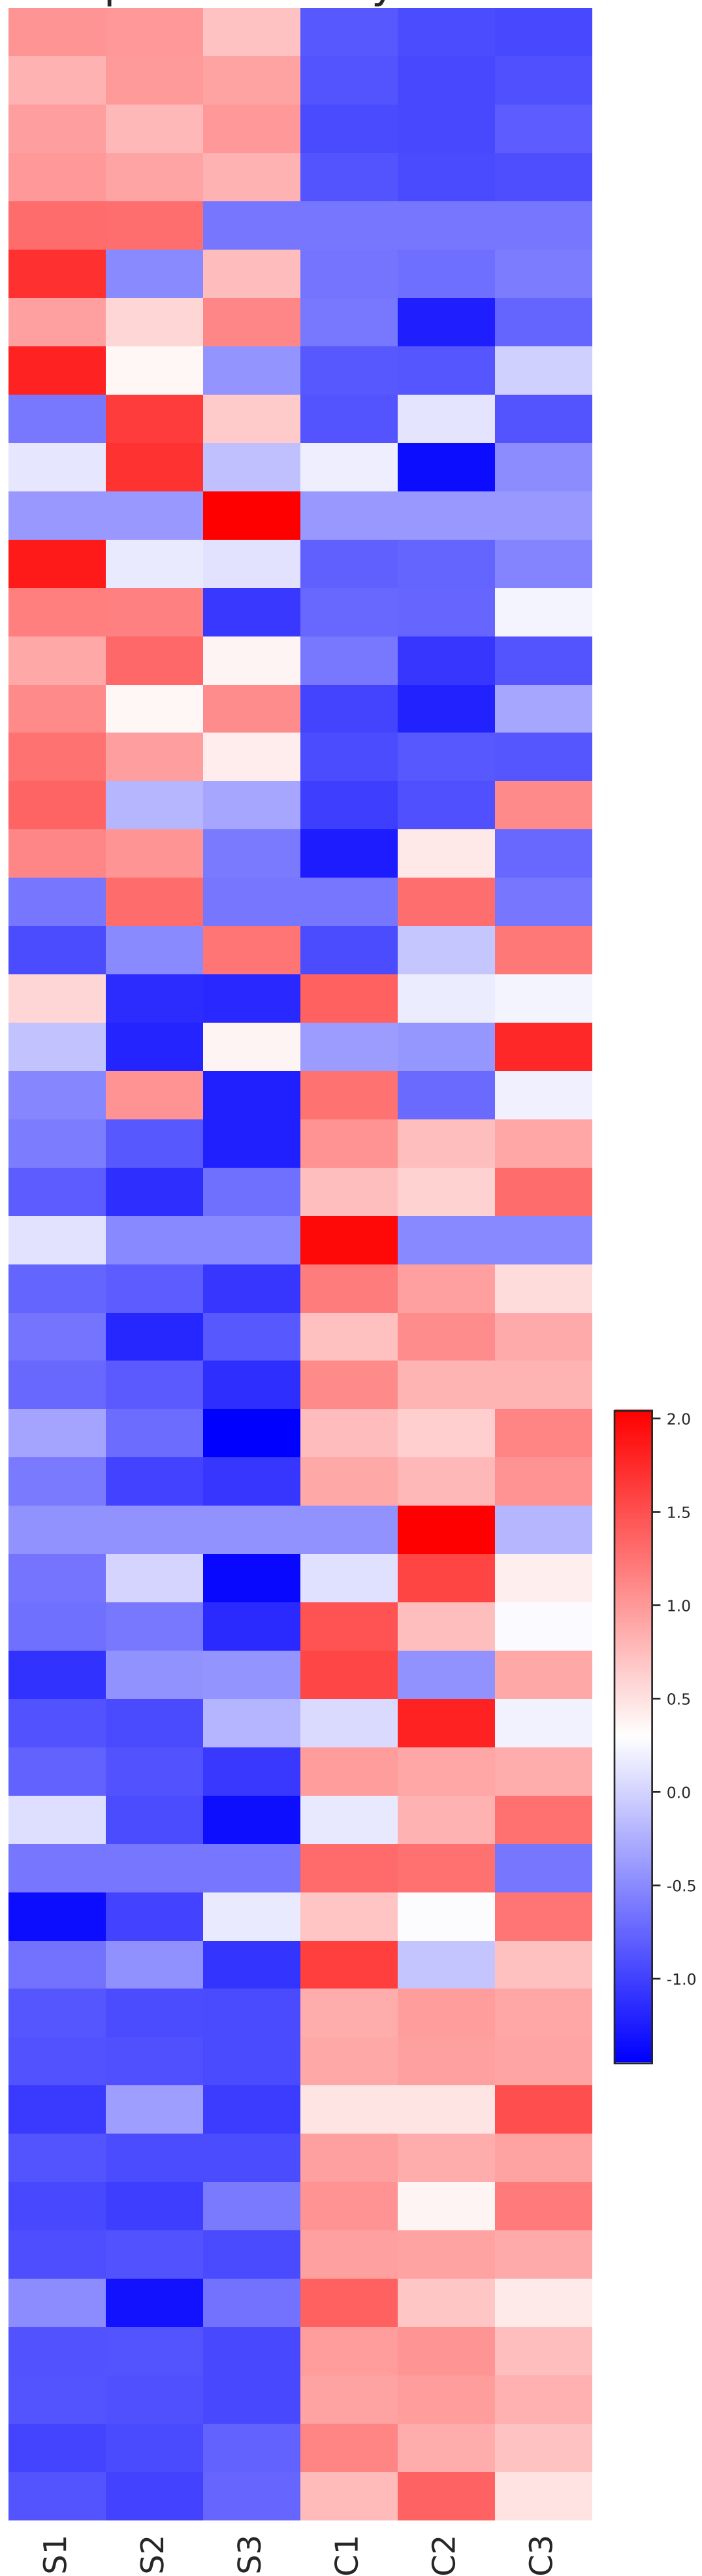

Supplement: Supplementary file 106 [file 501_extracellular matrix structural constituent(GO_0005201).heatmap.pdf › Source data/1.RNA-Seq source data/1.BMSCs/result/1.6.GSEA/S-vs-C/go/MF/501_extracellular matrix structural constituent(GO_0005201).heatmap.pdf]

# SH2 domain binding(GO:0042169)

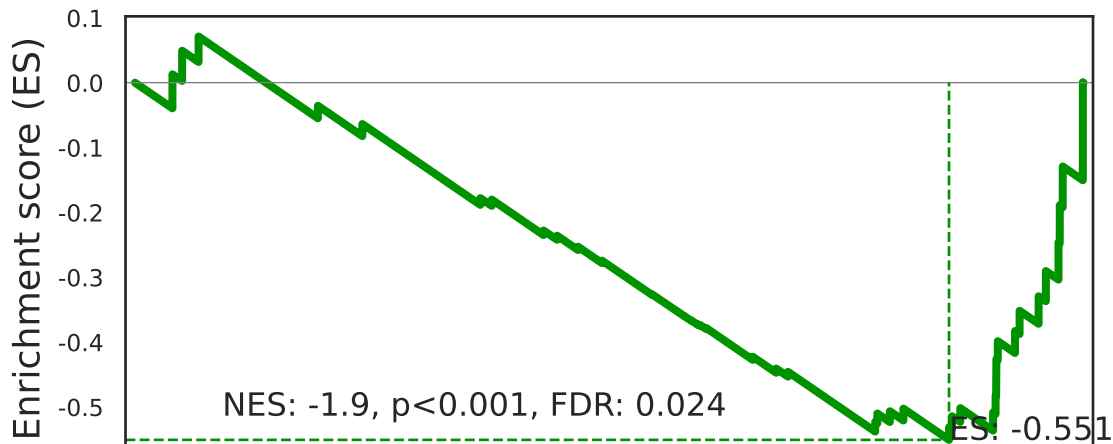

Ranked Metric  
(signal\_to\_noise)

5.0

2.5

0.0

-2.5

-5.0

S

Zero score at 11453

C

Supplement: Supplementary file 107 [file 502_SH2 domain binding(GO_0042169).gsea.pdf › Source data/1.RNA-Seq source data/1.BMSCs/result/1.6.GSEA/S-vs-C/go/MF/502_SH2 domain binding(GO_0042169).gsea.pdf]

SH2 domain binding(GO:0042169)  
Heatmap of the Analyzed GeneSet

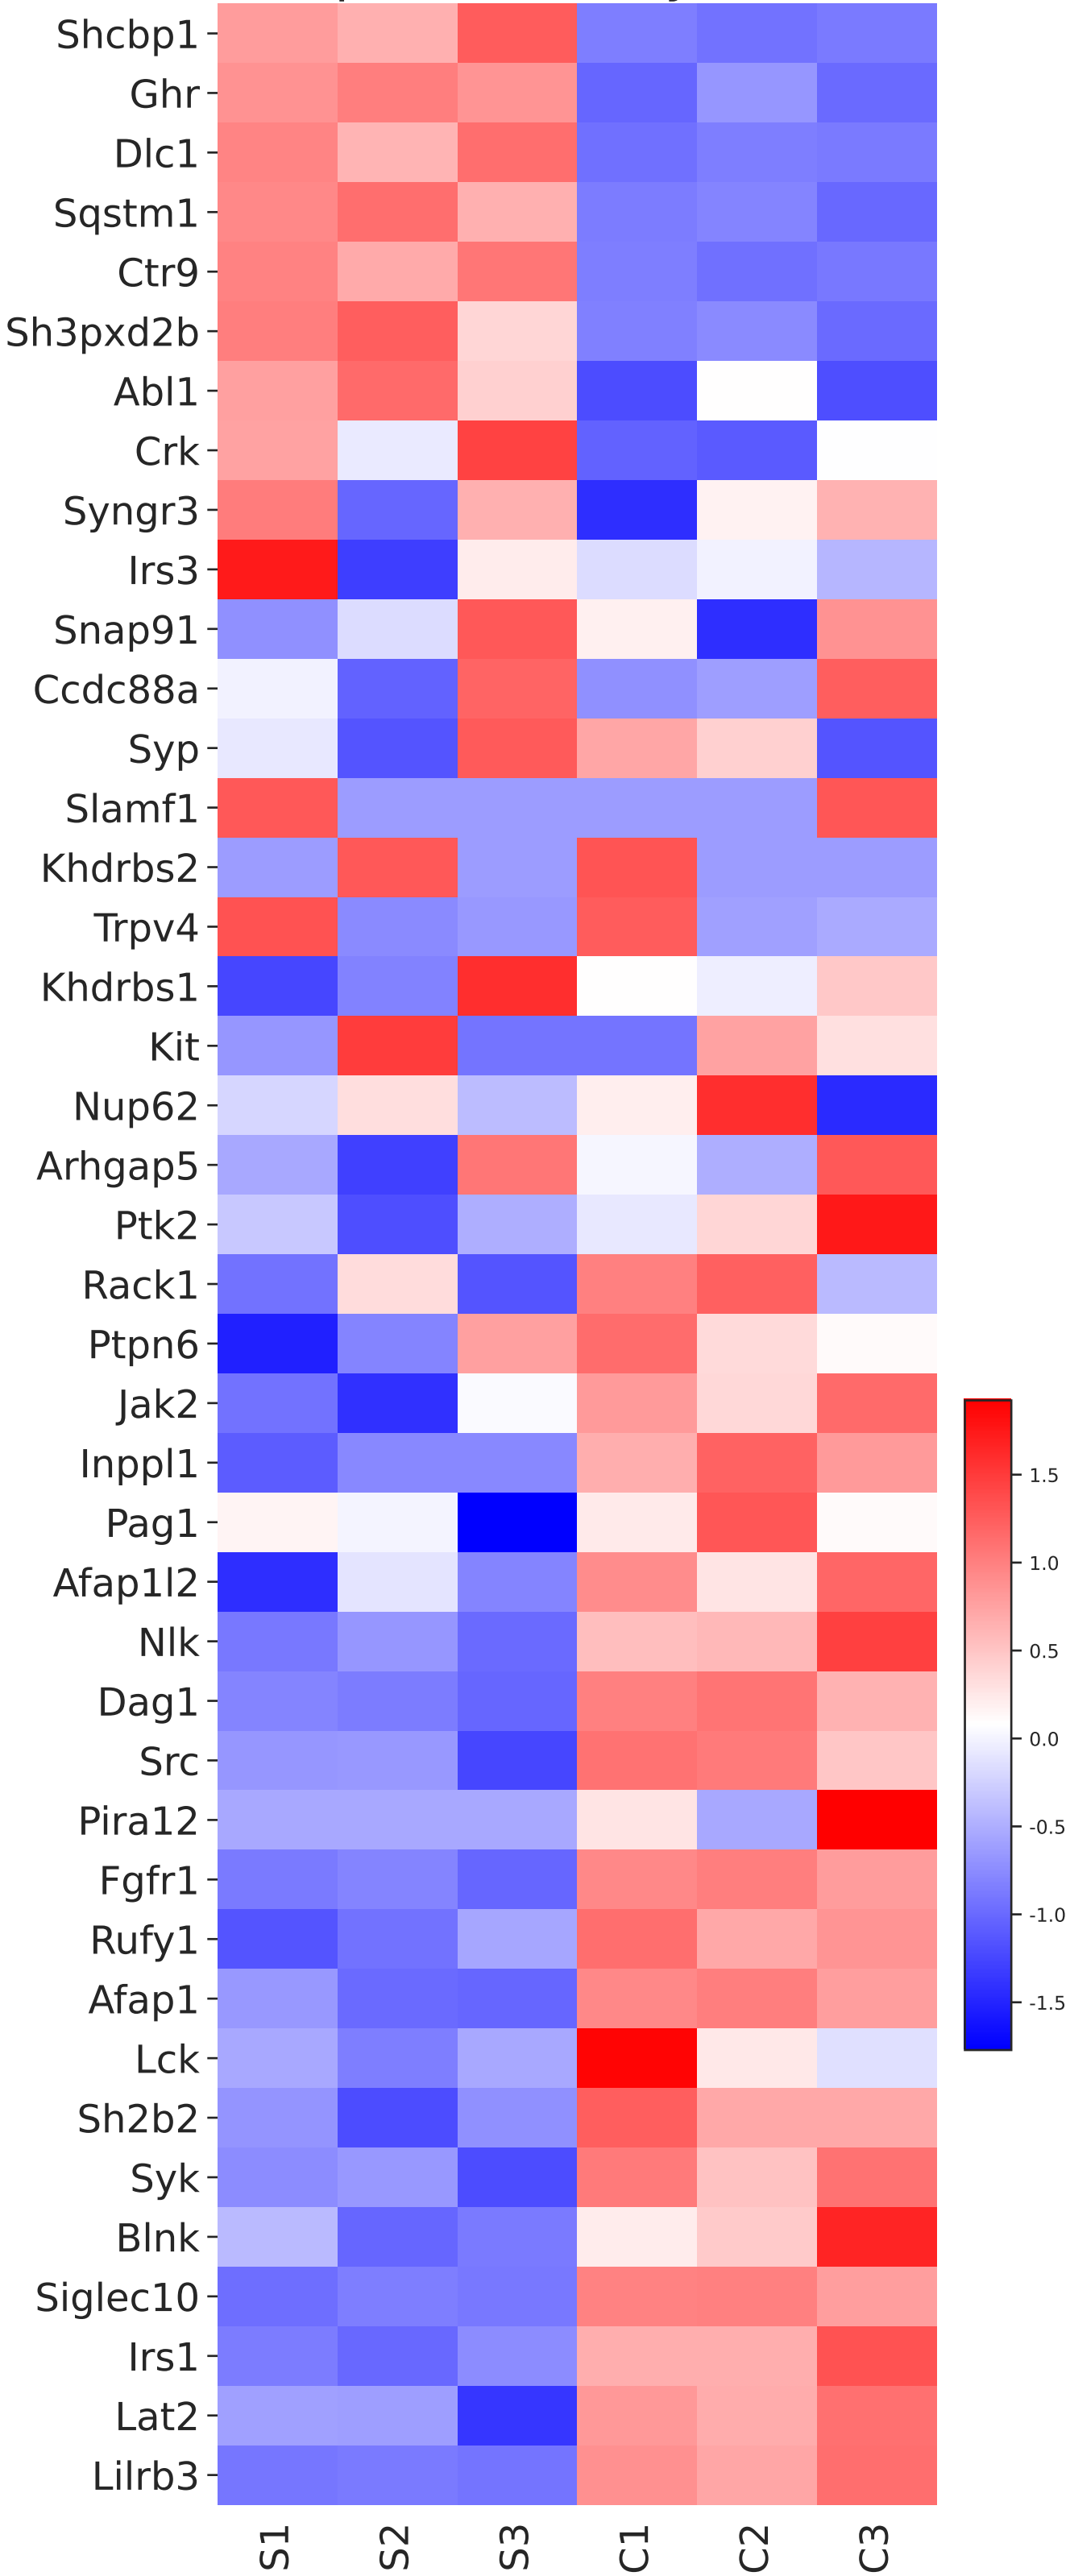

Supplement: Supplementary file 108 [file 502_SH2 domain binding(GO_0042169).heatmap.pdf › Source data/1.RNA-Seq source data/1.BMSCs/result/1.6.GSEA/S-vs-C/go/MF/502_SH2 domain binding(GO_0042169).heatmap.pdf]

# heparan sulfate proteoglycan binding(GO:0043395)

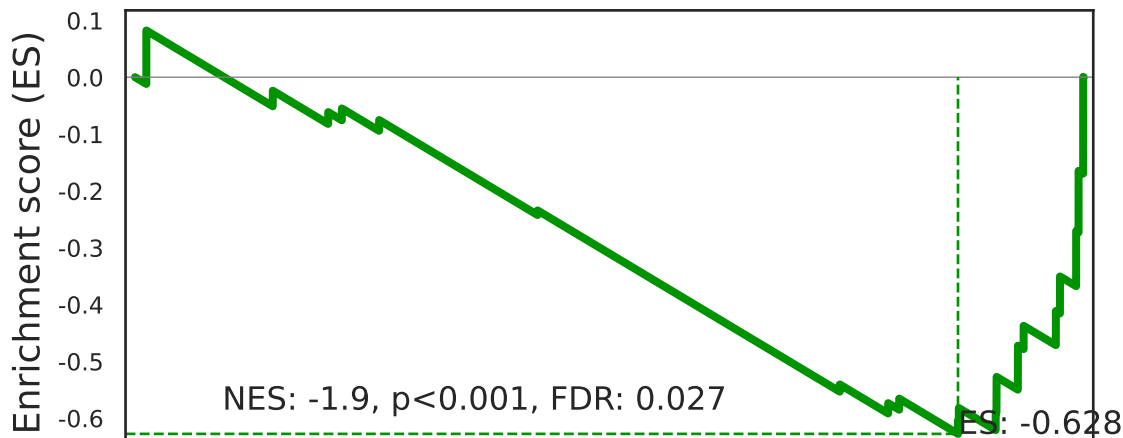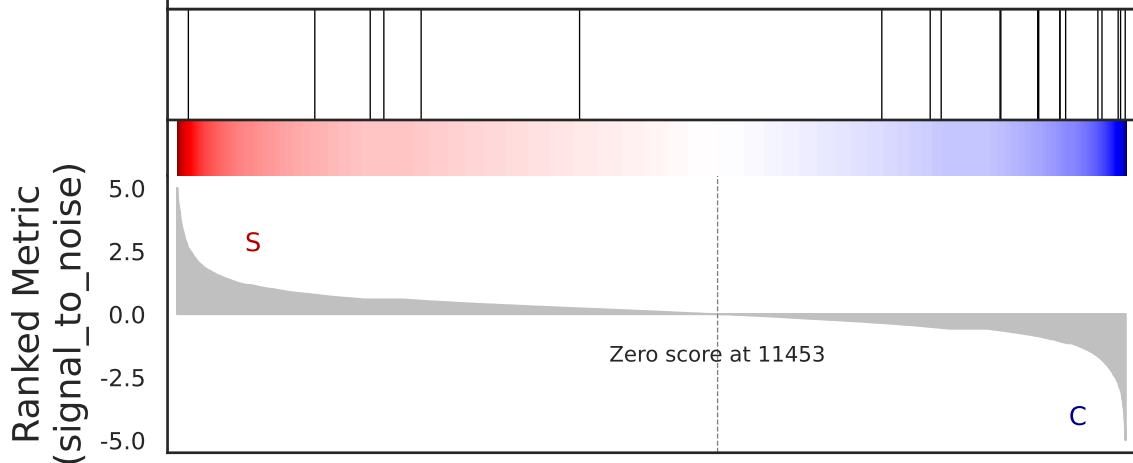

Supplement: Supplementary file 109 [file 503_heparan sulfate proteoglycan binding(GO_0043395).gsea.pdf › Source data/1.RNA-Seq source data/1.BMSCs/result/1.6.GSEA/S-vs-C/go/MF/503_heparan sulfate proteoglycan binding(GO_0043395).gsea.pdf]

heparan sulfate proteoglycan binding(GO:0043395)

Heatmap of the Analyzed GeneSet

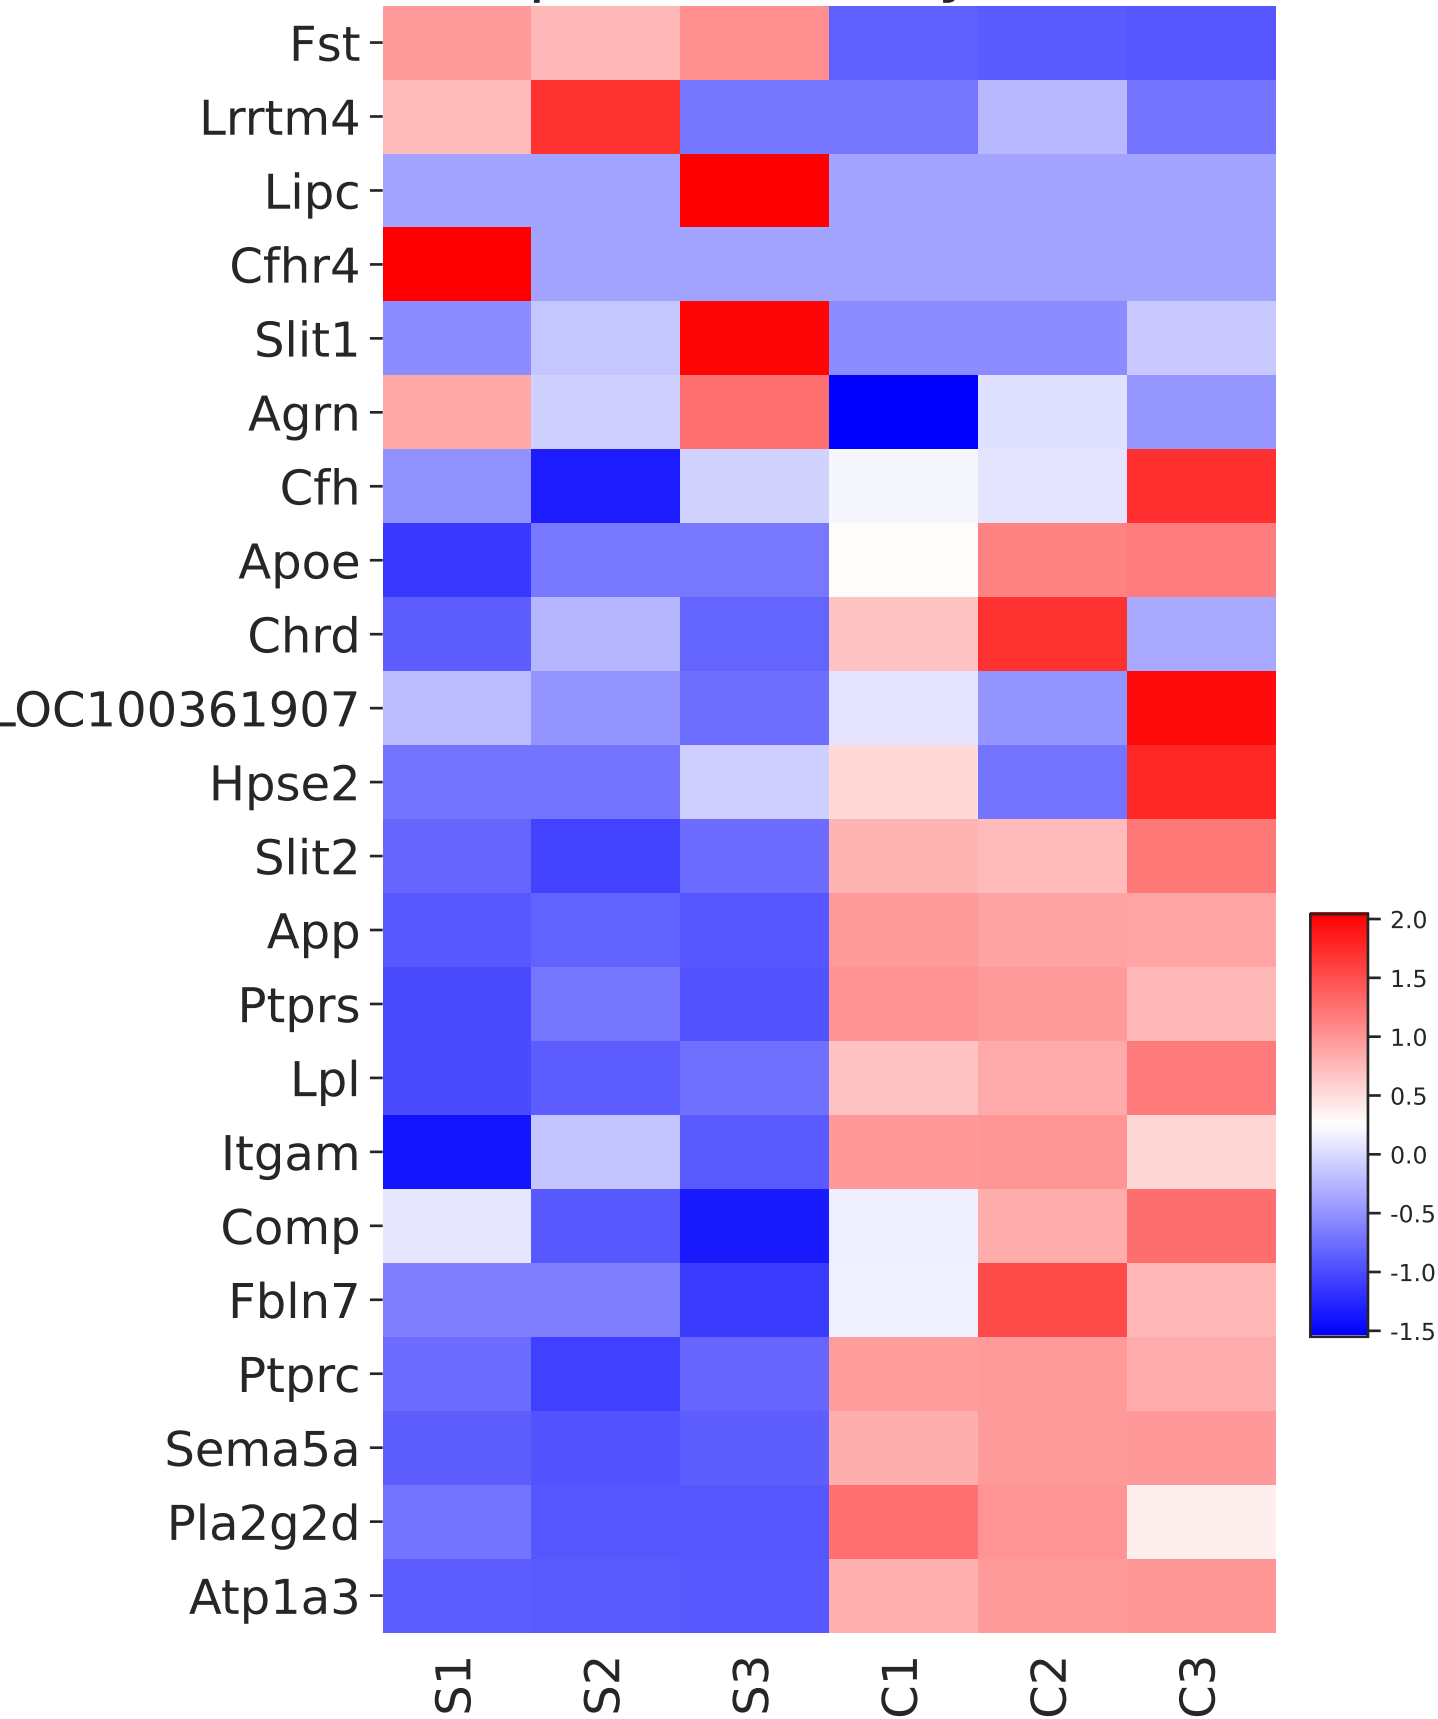

Supplement: Supplementary file 110 [file 503_heparan sulfate proteoglycan binding(GO_0043395).heatmap.pdf › Source data/1.RNA-Seq source data/1.BMSCs/result/1.6.GSEA/S-vs-C/go/MF/503_heparan sulfate proteoglycan binding(GO_0043395).heatmap.pdf]

**transmembrane receptor protein tyrosine kinase adaptor ac...(GO:0005068)**

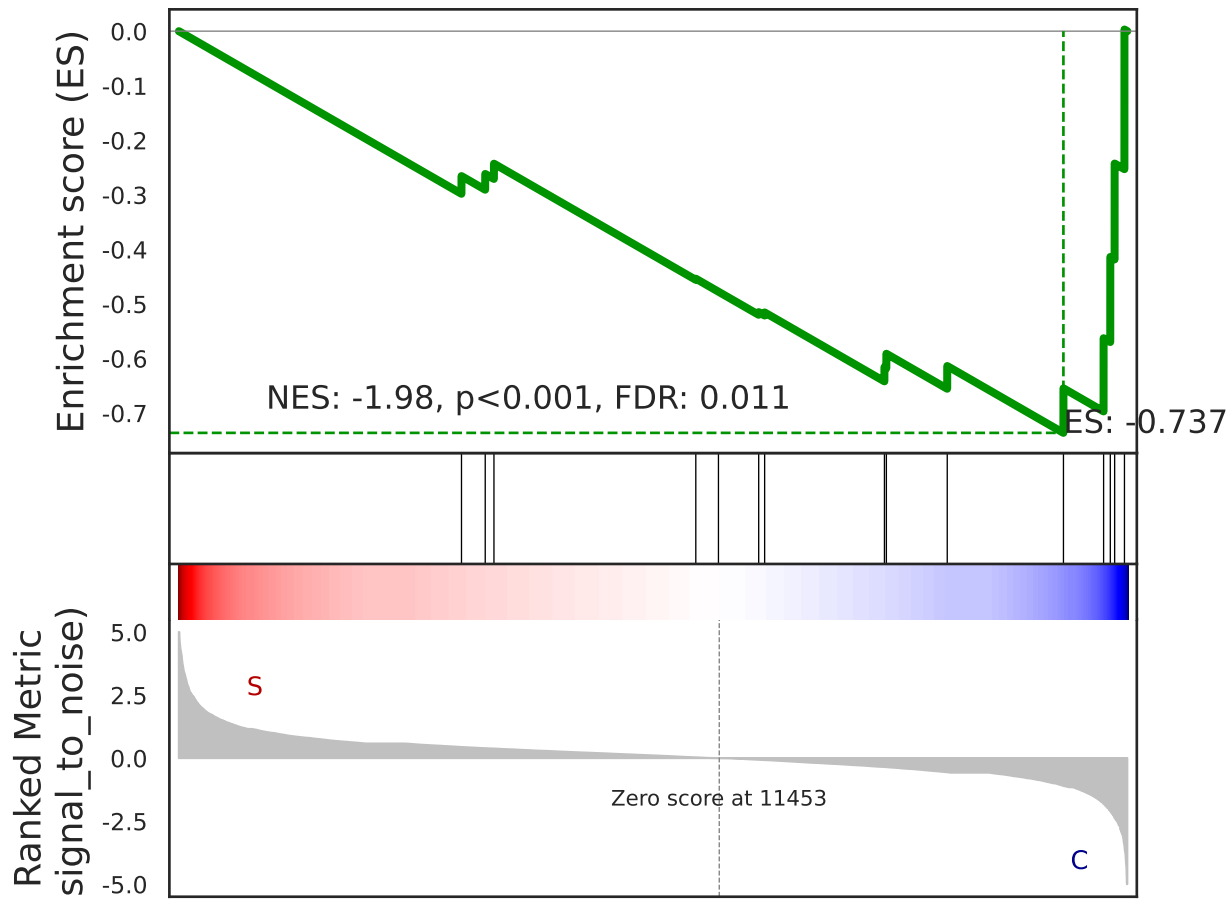

Supplement: Supplementary file 111 [file 504_transmembrane receptor protein tyrosine kinase adaptor ac...(GO_0005068).gsea.pdf › Source data/1.RNA-Seq source data/1.BMSCs/result/1.6.GSEA/S-vs-C/go/MF/504_transmembrane receptor protein tyrosine kinase adaptor ac...(GO_0005068).gsea.pdf]

# 3',5'-cyclic-AMP phosphodiesterase activity(GO:0004115)

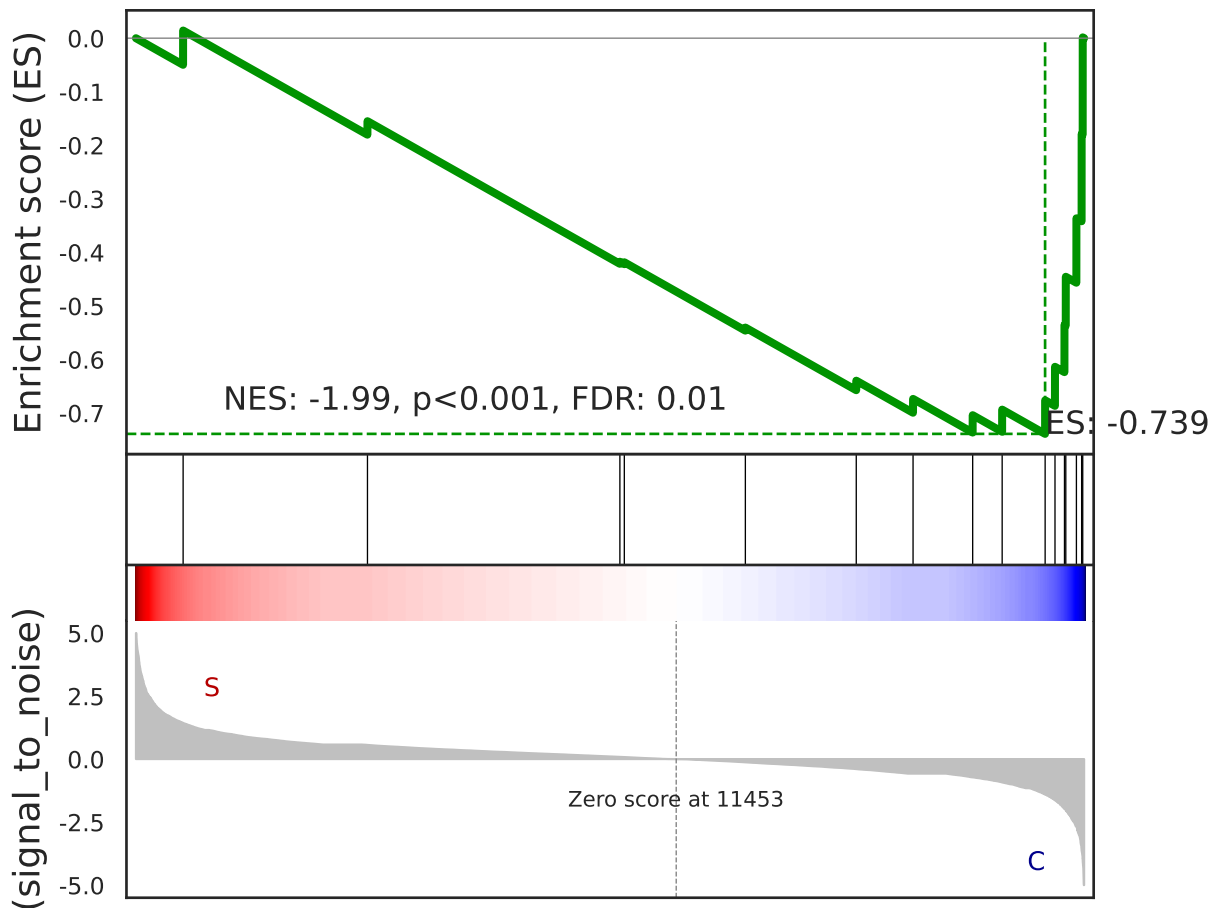

Supplement: Supplementary file 113 [file 505_3',5'-cyclic-AMP phosphodiesterase activity(GO_0004115).gsea.pdf › Source data/1.RNA-Seq source data/1.BMSCs/result/1.6.GSEA/S-vs-C/go/MF/505_3',5'-cyclic-AMP phosphodiesterase activity(GO_0004115).gsea.pdf]

# 3',5'-cyclic-AMP phosphodiesterase activity(GO:0004115)

## Heatmap of the Analyzed GeneSet

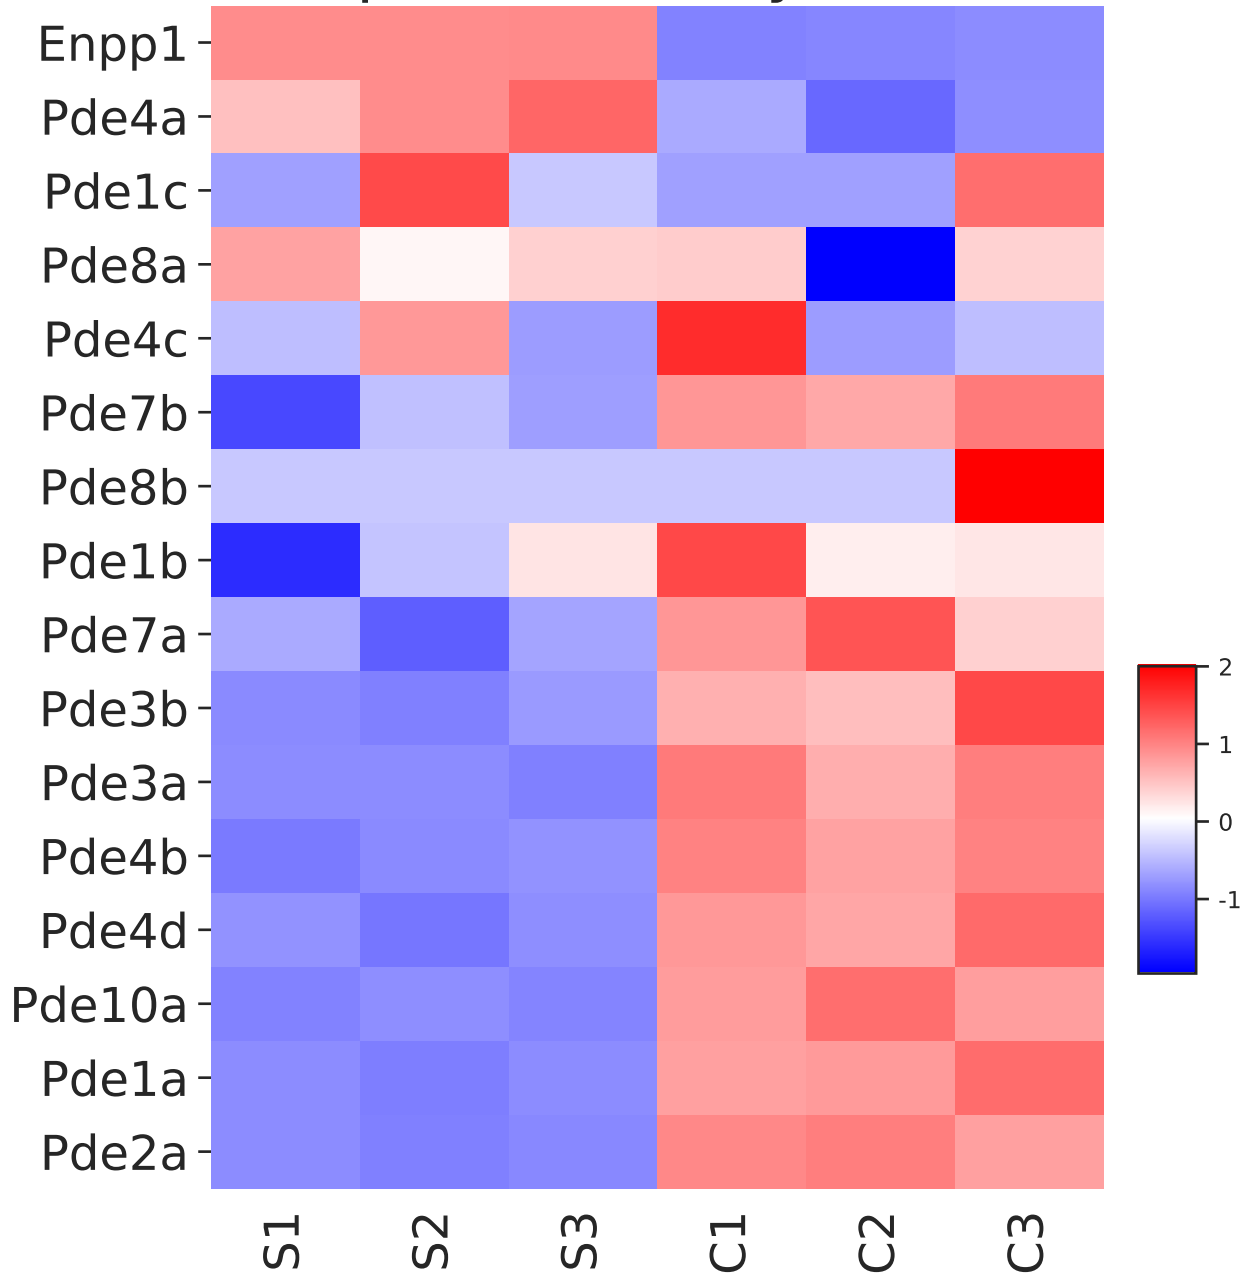

Supplement: Supplementary file 114 [file 505_3',5'-cyclic-AMP phosphodiesterase activity(GO_0004115).heatmap.pdf › Source data/1.RNA-Seq source data/1.BMSCs/result/1.6.GSEA/S-vs-C/go/MF/505_3',5'-cyclic-AMP phosphodiesterase activity(GO_0004115).heatmap.pdf]

# 3',5'-cyclic-GMP phosphodiesterase activity(GO:0047555)

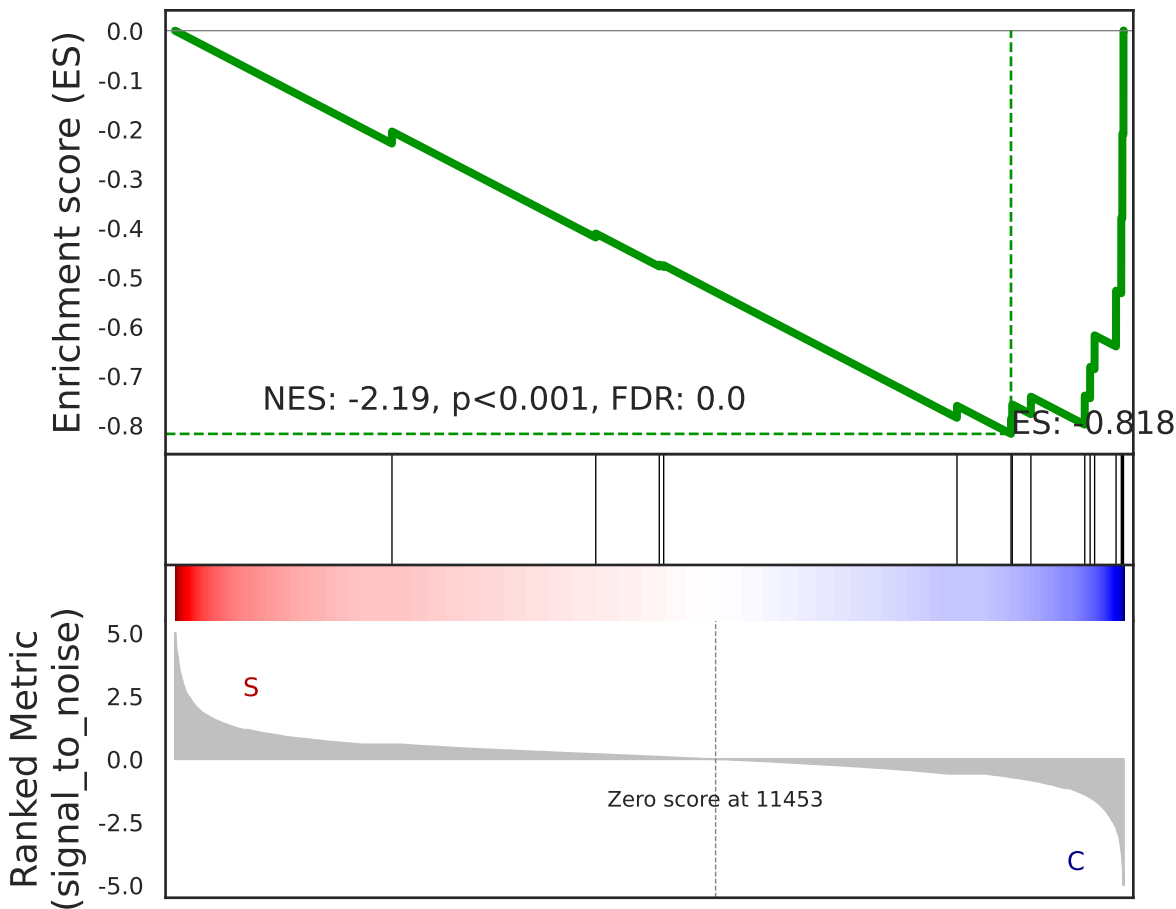

Supplement: Supplementary file 115 [file 506_3',5'-cyclic-GMP phosphodiesterase activity(GO_0047555).gsea.pdf › Source data/1.RNA-Seq source data/1.BMSCs/result/1.6.GSEA/S-vs-C/go/MF/506_3',5'-cyclic-GMP phosphodiesterase activity(GO_0047555).gsea.pdf]

# 3',5'-cyclic-GMP phosphodiesterase activity(GO:0047555)

## Heatmap of the Analyzed GeneSet

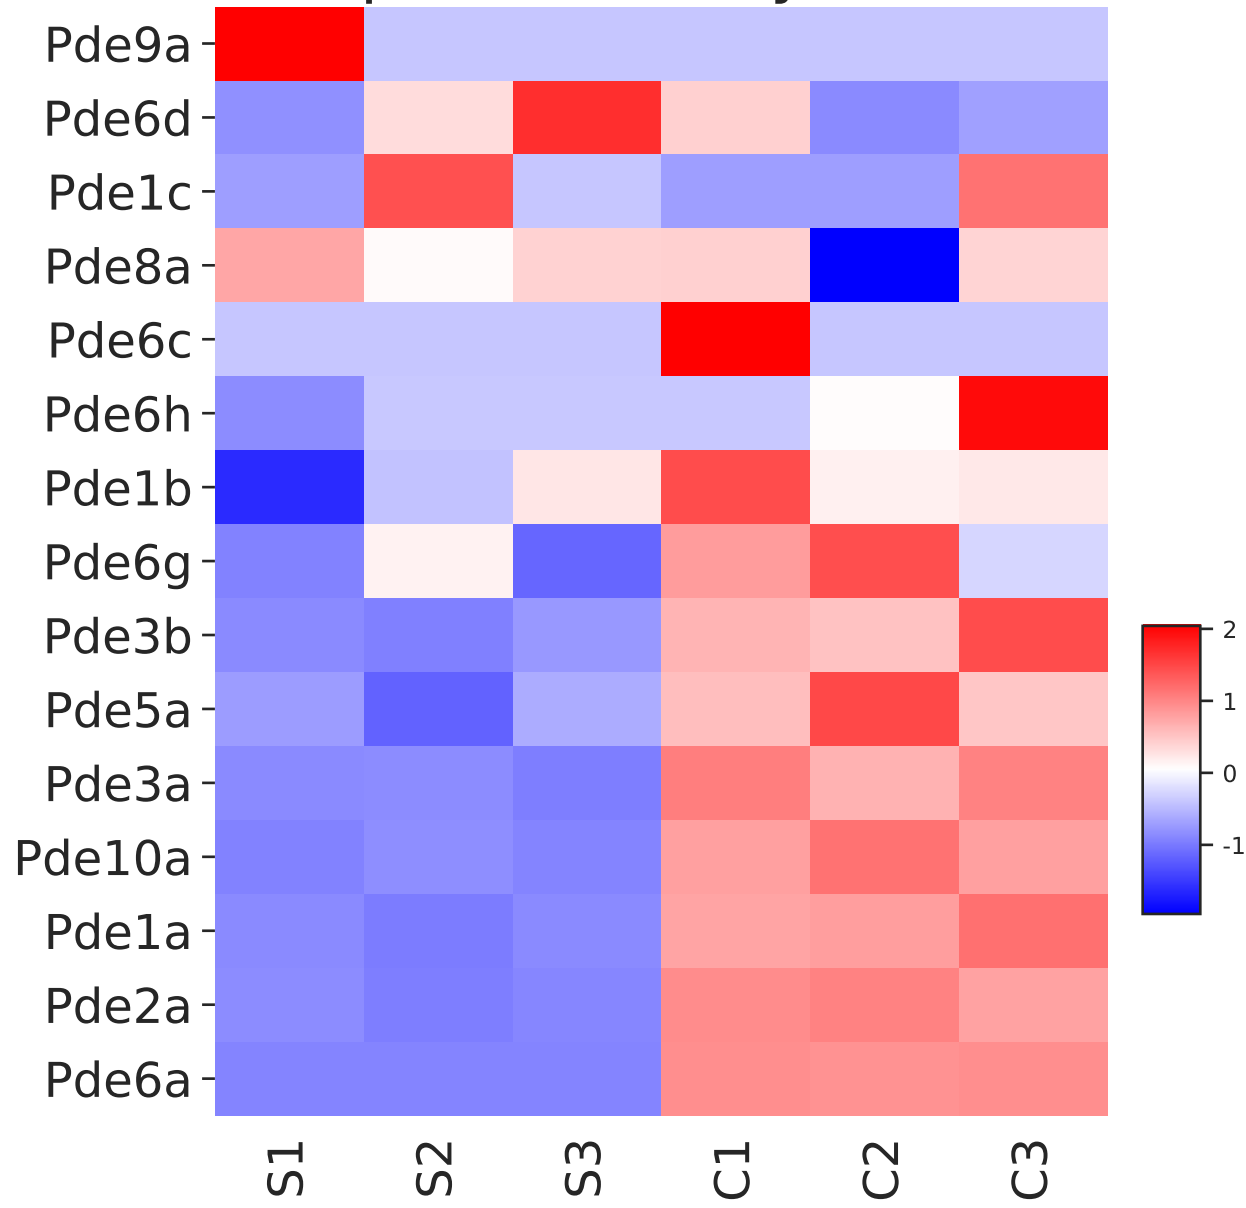

Supplement: Supplementary file 116 [file 506_3',5'-cyclic-GMP phosphodiesterase activity(GO_0047555).heatmap.pdf › Source data/1.RNA-Seq source data/1.BMSCs/result/1.6.GSEA/S-vs-C/go/MF/506_3',5'-cyclic-GMP phosphodiesterase activity(GO_0047555).heatmap.pdf]

# CCR chemokine receptor binding(GO:0048020)

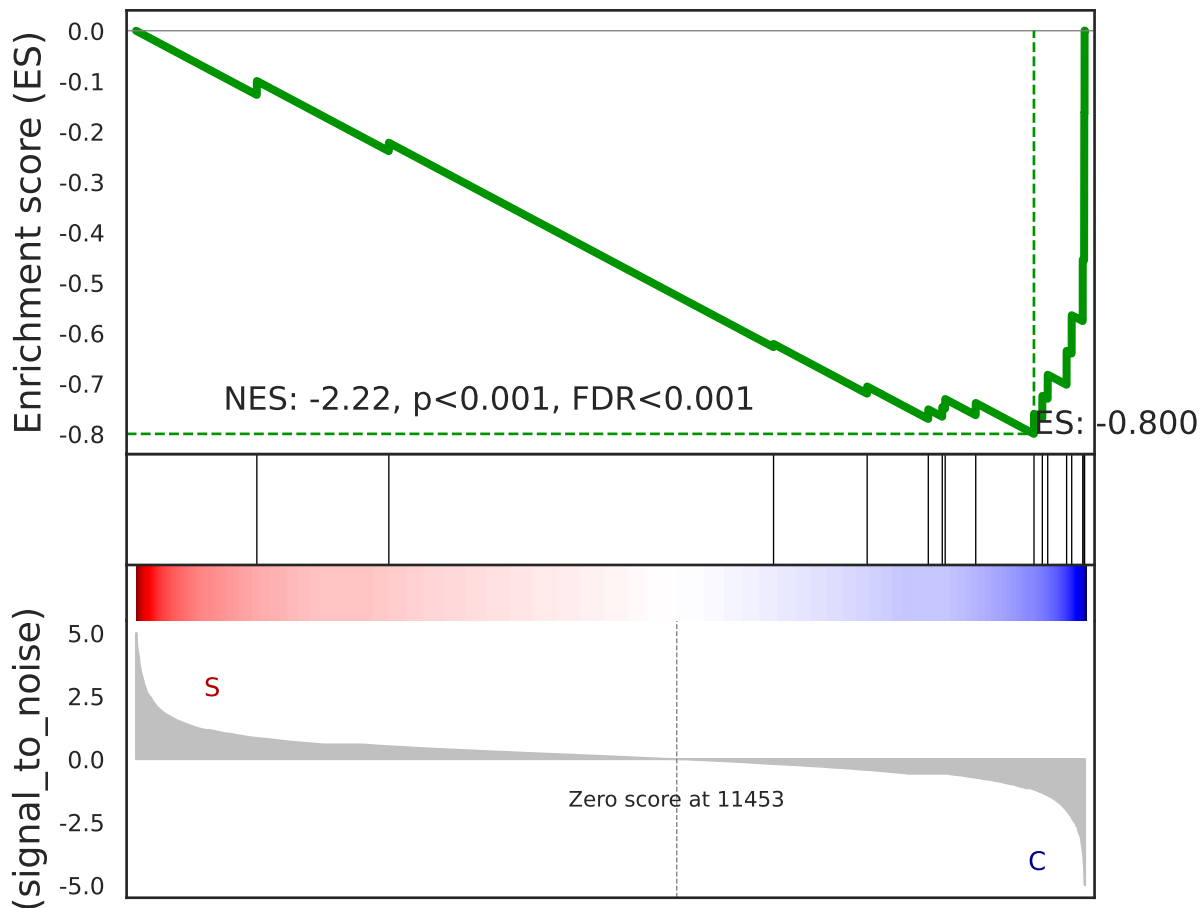

Supplement: Supplementary file 117 [file 507_CCR chemokine receptor binding(GO_0048020).gsea.pdf › Source data/1.RNA-Seq source data/1.BMSCs/result/1.6.GSEA/S-vs-C/go/MF/507_CCR chemokine receptor binding(GO_0048020).gsea.pdf]

# CCR chemokine receptor binding(GO:0048020)

## Heatmap of the Analyzed GeneSet

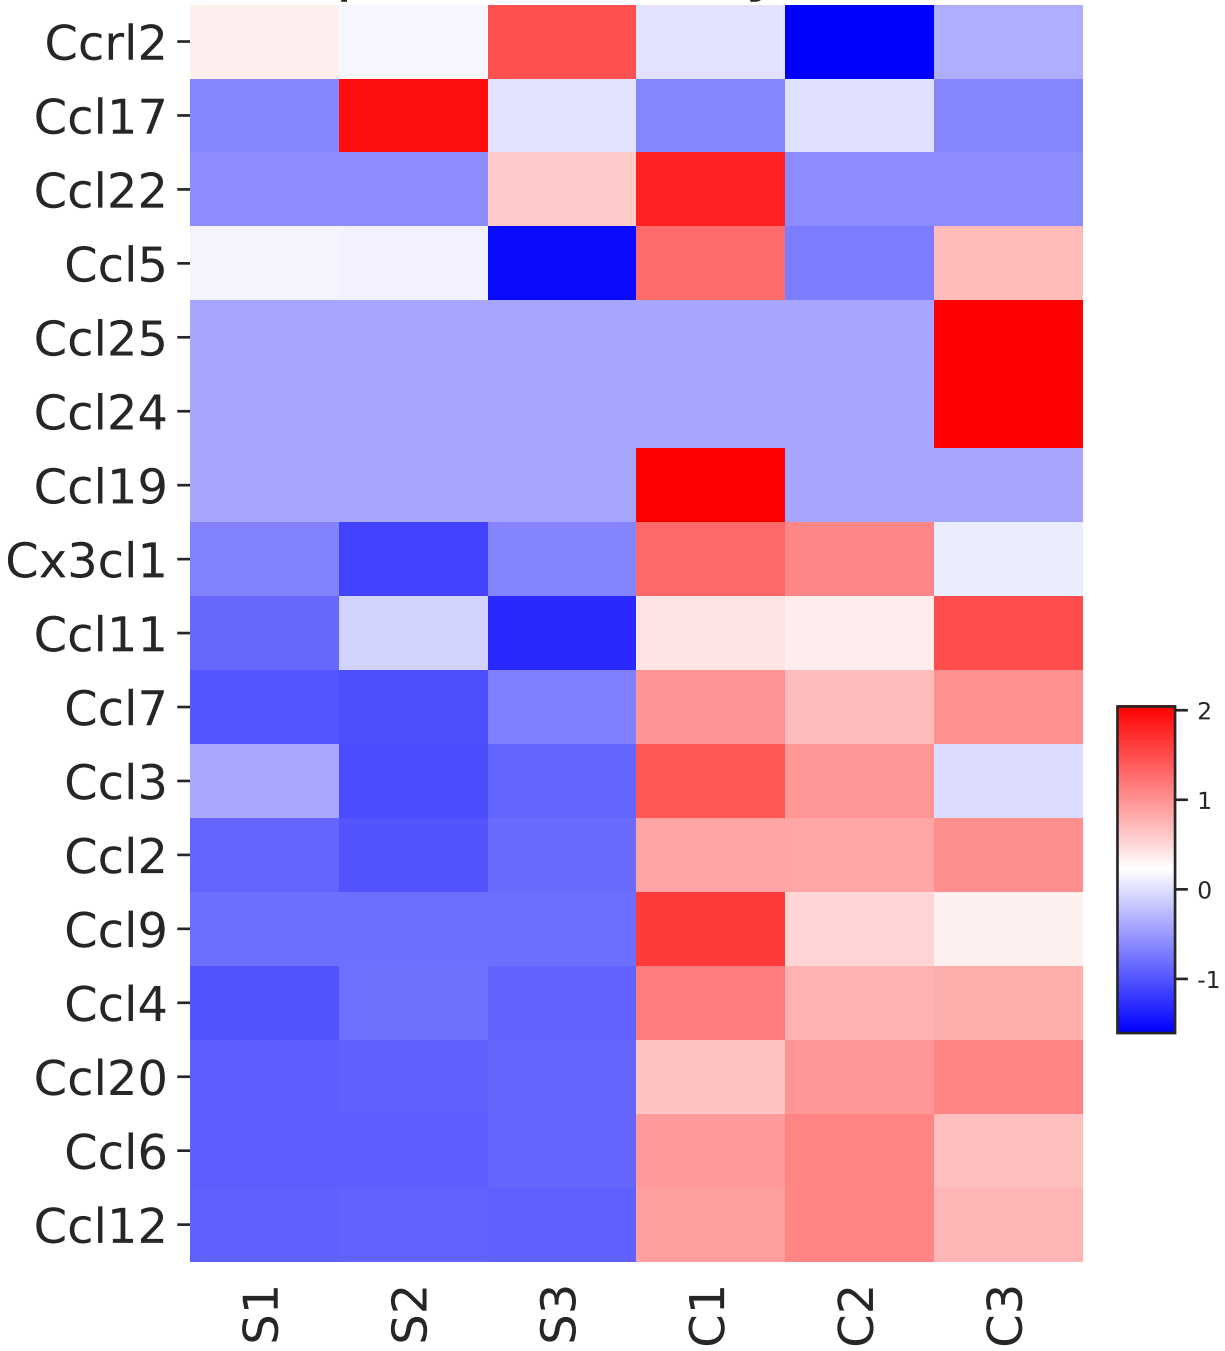

Supplement: Supplementary file 118 [file 507_CCR chemokine receptor binding(GO_0048020).heatmap.pdf › Source data/1.RNA-Seq source data/1.BMSCs/result/1.6.GSEA/S-vs-C/go/MF/507_CCR chemokine receptor binding(GO_0048020).heatmap.pdf]

# 3',5'-cyclic-nucleotide phosphodiesterase activity(GO:0004114)

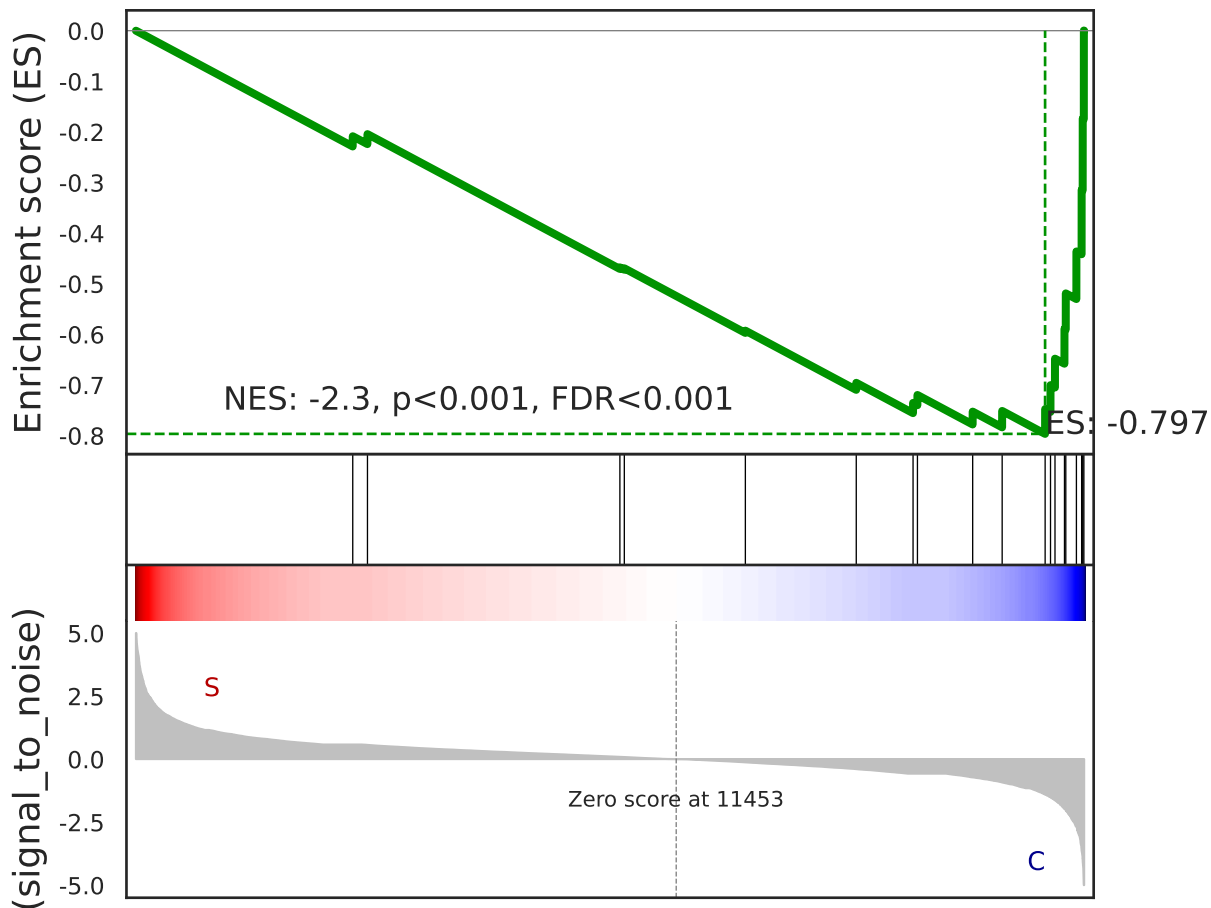

Supplement: Supplementary file 119 [file 508_3',5'-cyclic-nucleotide phosphodiesterase activity(GO_0004114).gsea.pdf › Source data/1.RNA-Seq source data/1.BMSCs/result/1.6.GSEA/S-vs-C/go/MF/508_3',5'-cyclic-nucleotide phosphodiesterase activity(GO_0004114).gsea.pdf]

3',5'-cyclic-nucleotide phosphodiesterase activity(GO:0004114)  
Heatmap of the Analyzed GeneSet

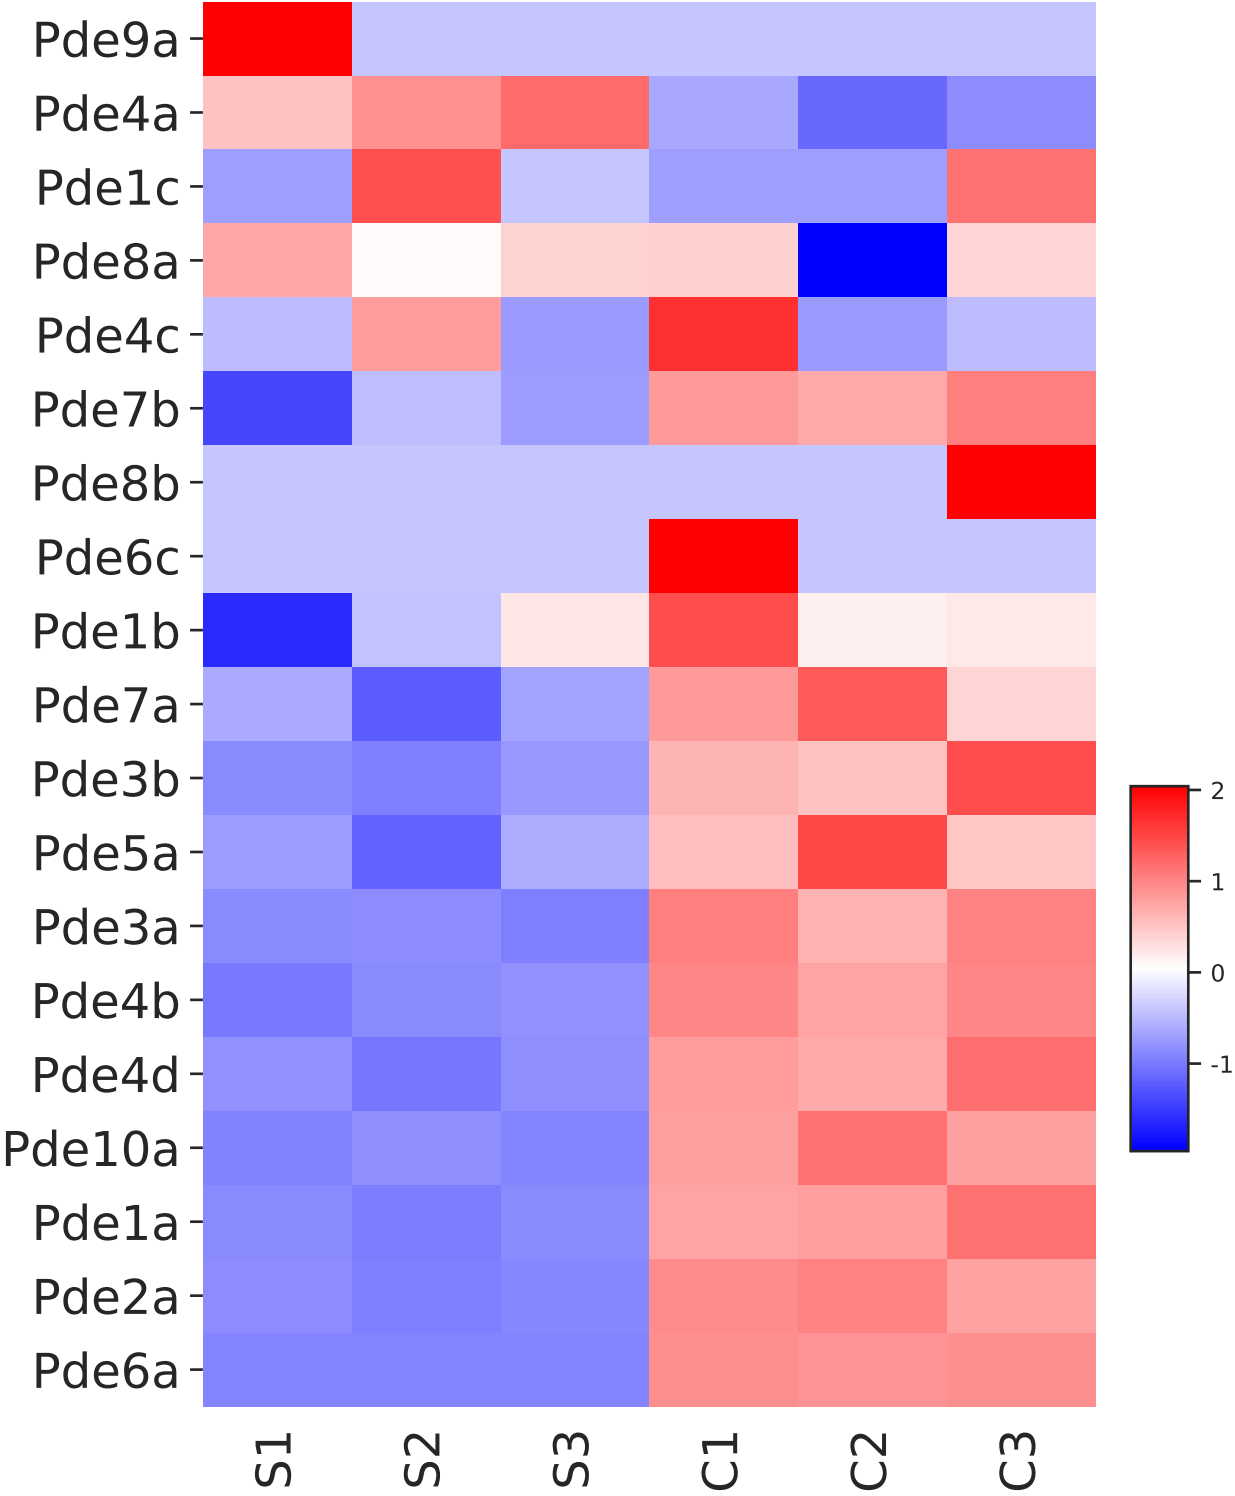

Supplement: Supplementary file 120 [file 508_3',5'-cyclic-nucleotide phosphodiesterase activity(GO_0004114).heatmap.pdf › Source data/1.RNA-Seq source data/1.BMSCs/result/1.6.GSEA/S-vs-C/go/MF/508_3',5'-cyclic-nucleotide phosphodiesterase activity(GO_0004114).heatmap.pdf]

# chemokine activity(GO:0008009)

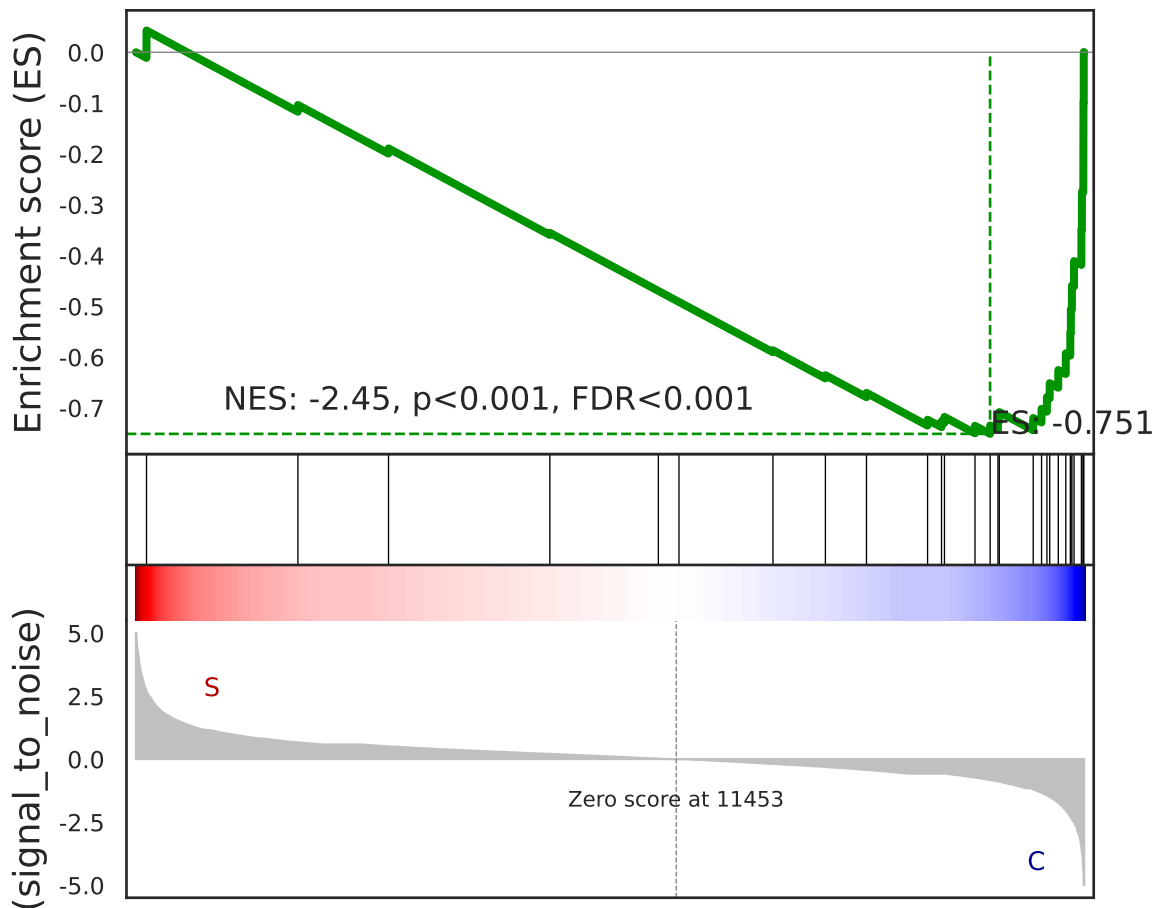

Supplement: Supplementary file 121 [file 509_chemokine activity(GO_0008009).gsea.pdf › Source data/1.RNA-Seq source data/1.BMSCs/result/1.6.GSEA/S-vs-C/go/MF/509_chemokine activity(GO_0008009).gsea.pdf]

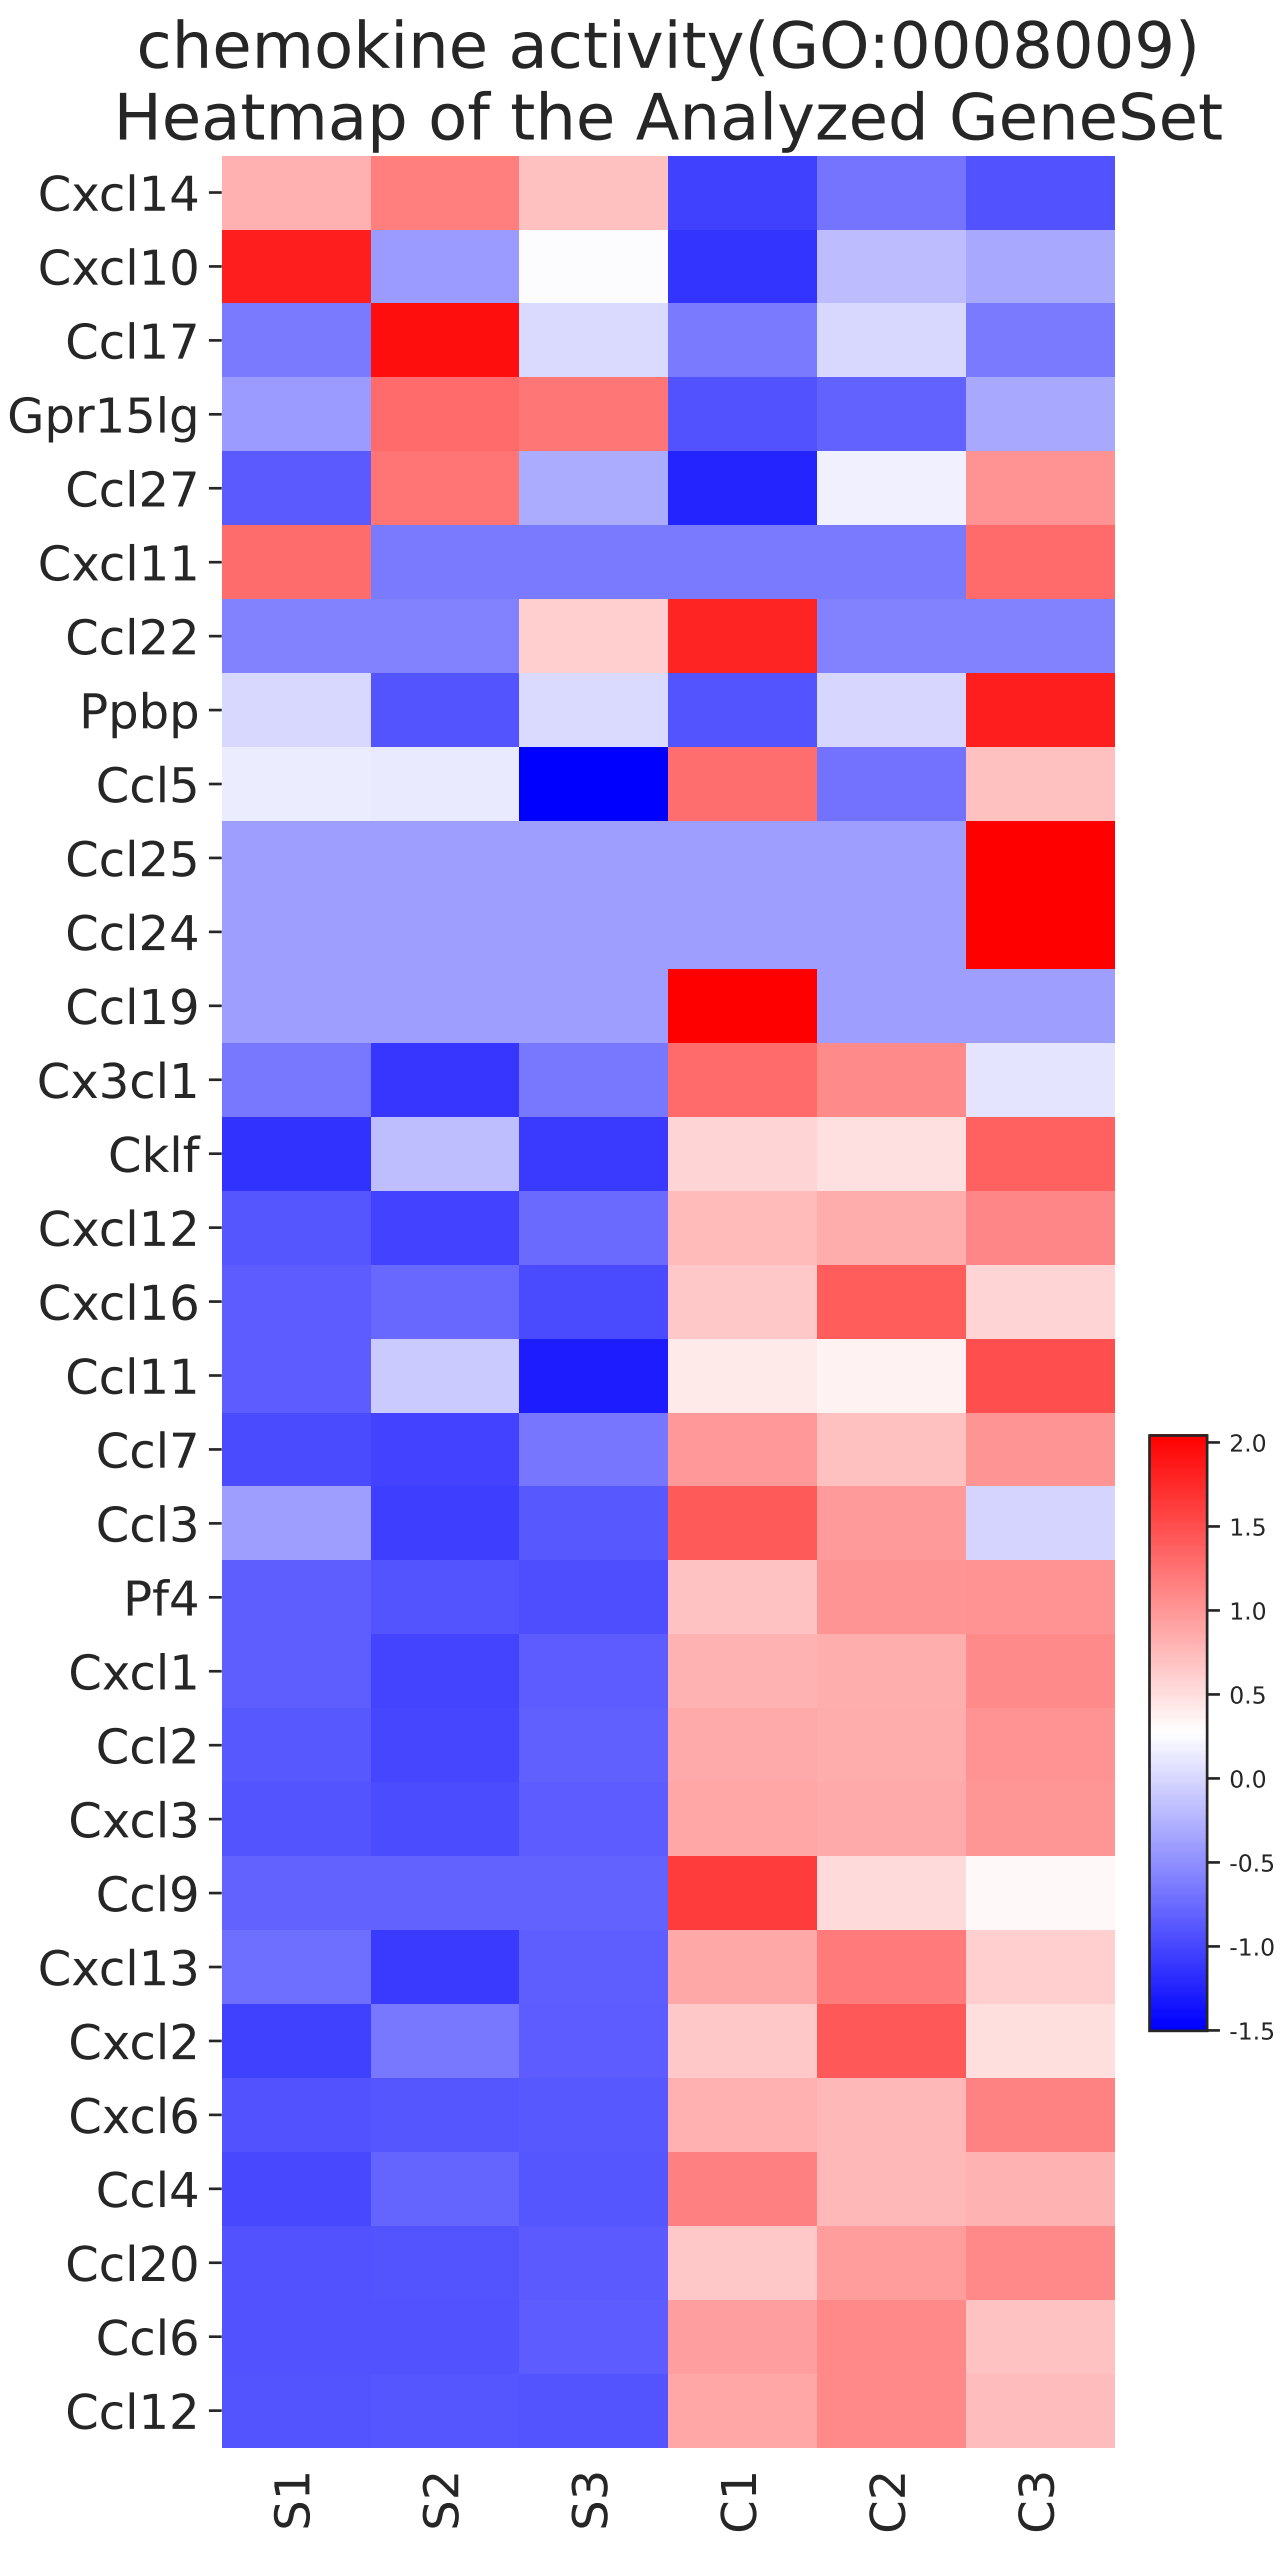

Supplement: Supplementary file 122 [file 509_chemokine activity(GO_0008009).heatmap.pdf › Source data/1.RNA-Seq source data/1.BMSCs/result/1.6.GSEA/S-vs-C/go/MF/509_chemokine activity(GO_0008009).heatmap.pdf]

**ferrous iron binding(GO:0008198)**

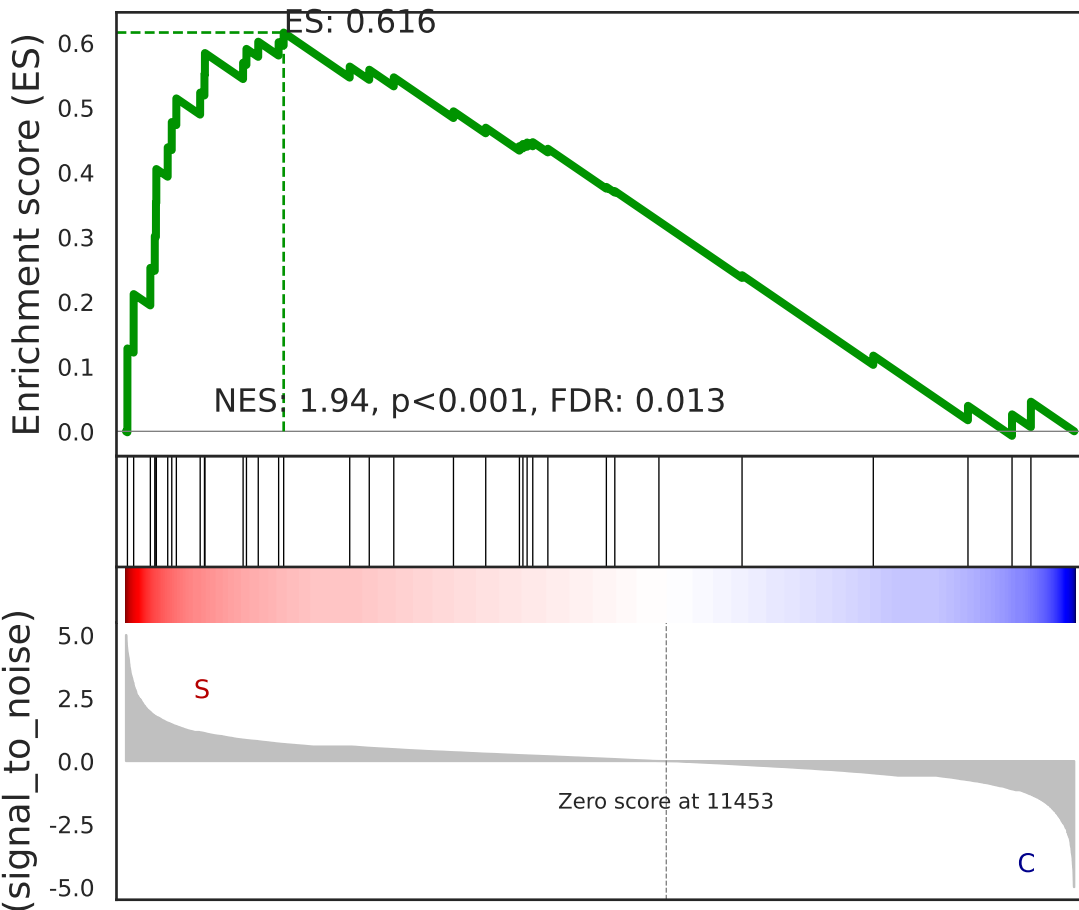

Supplement: Supplementary file 123 [file 5_ferrous iron binding(GO_0008198).gsea.pdf › Source data/1.RNA-Seq source data/1.BMSCs/result/1.6.GSEA/S-vs-C/go/MF/5_ferrous iron binding(GO_0008198).gsea.pdf]

ferrous iron binding(GO:0008198)  
Heatmap of the Analyzed GeneSet

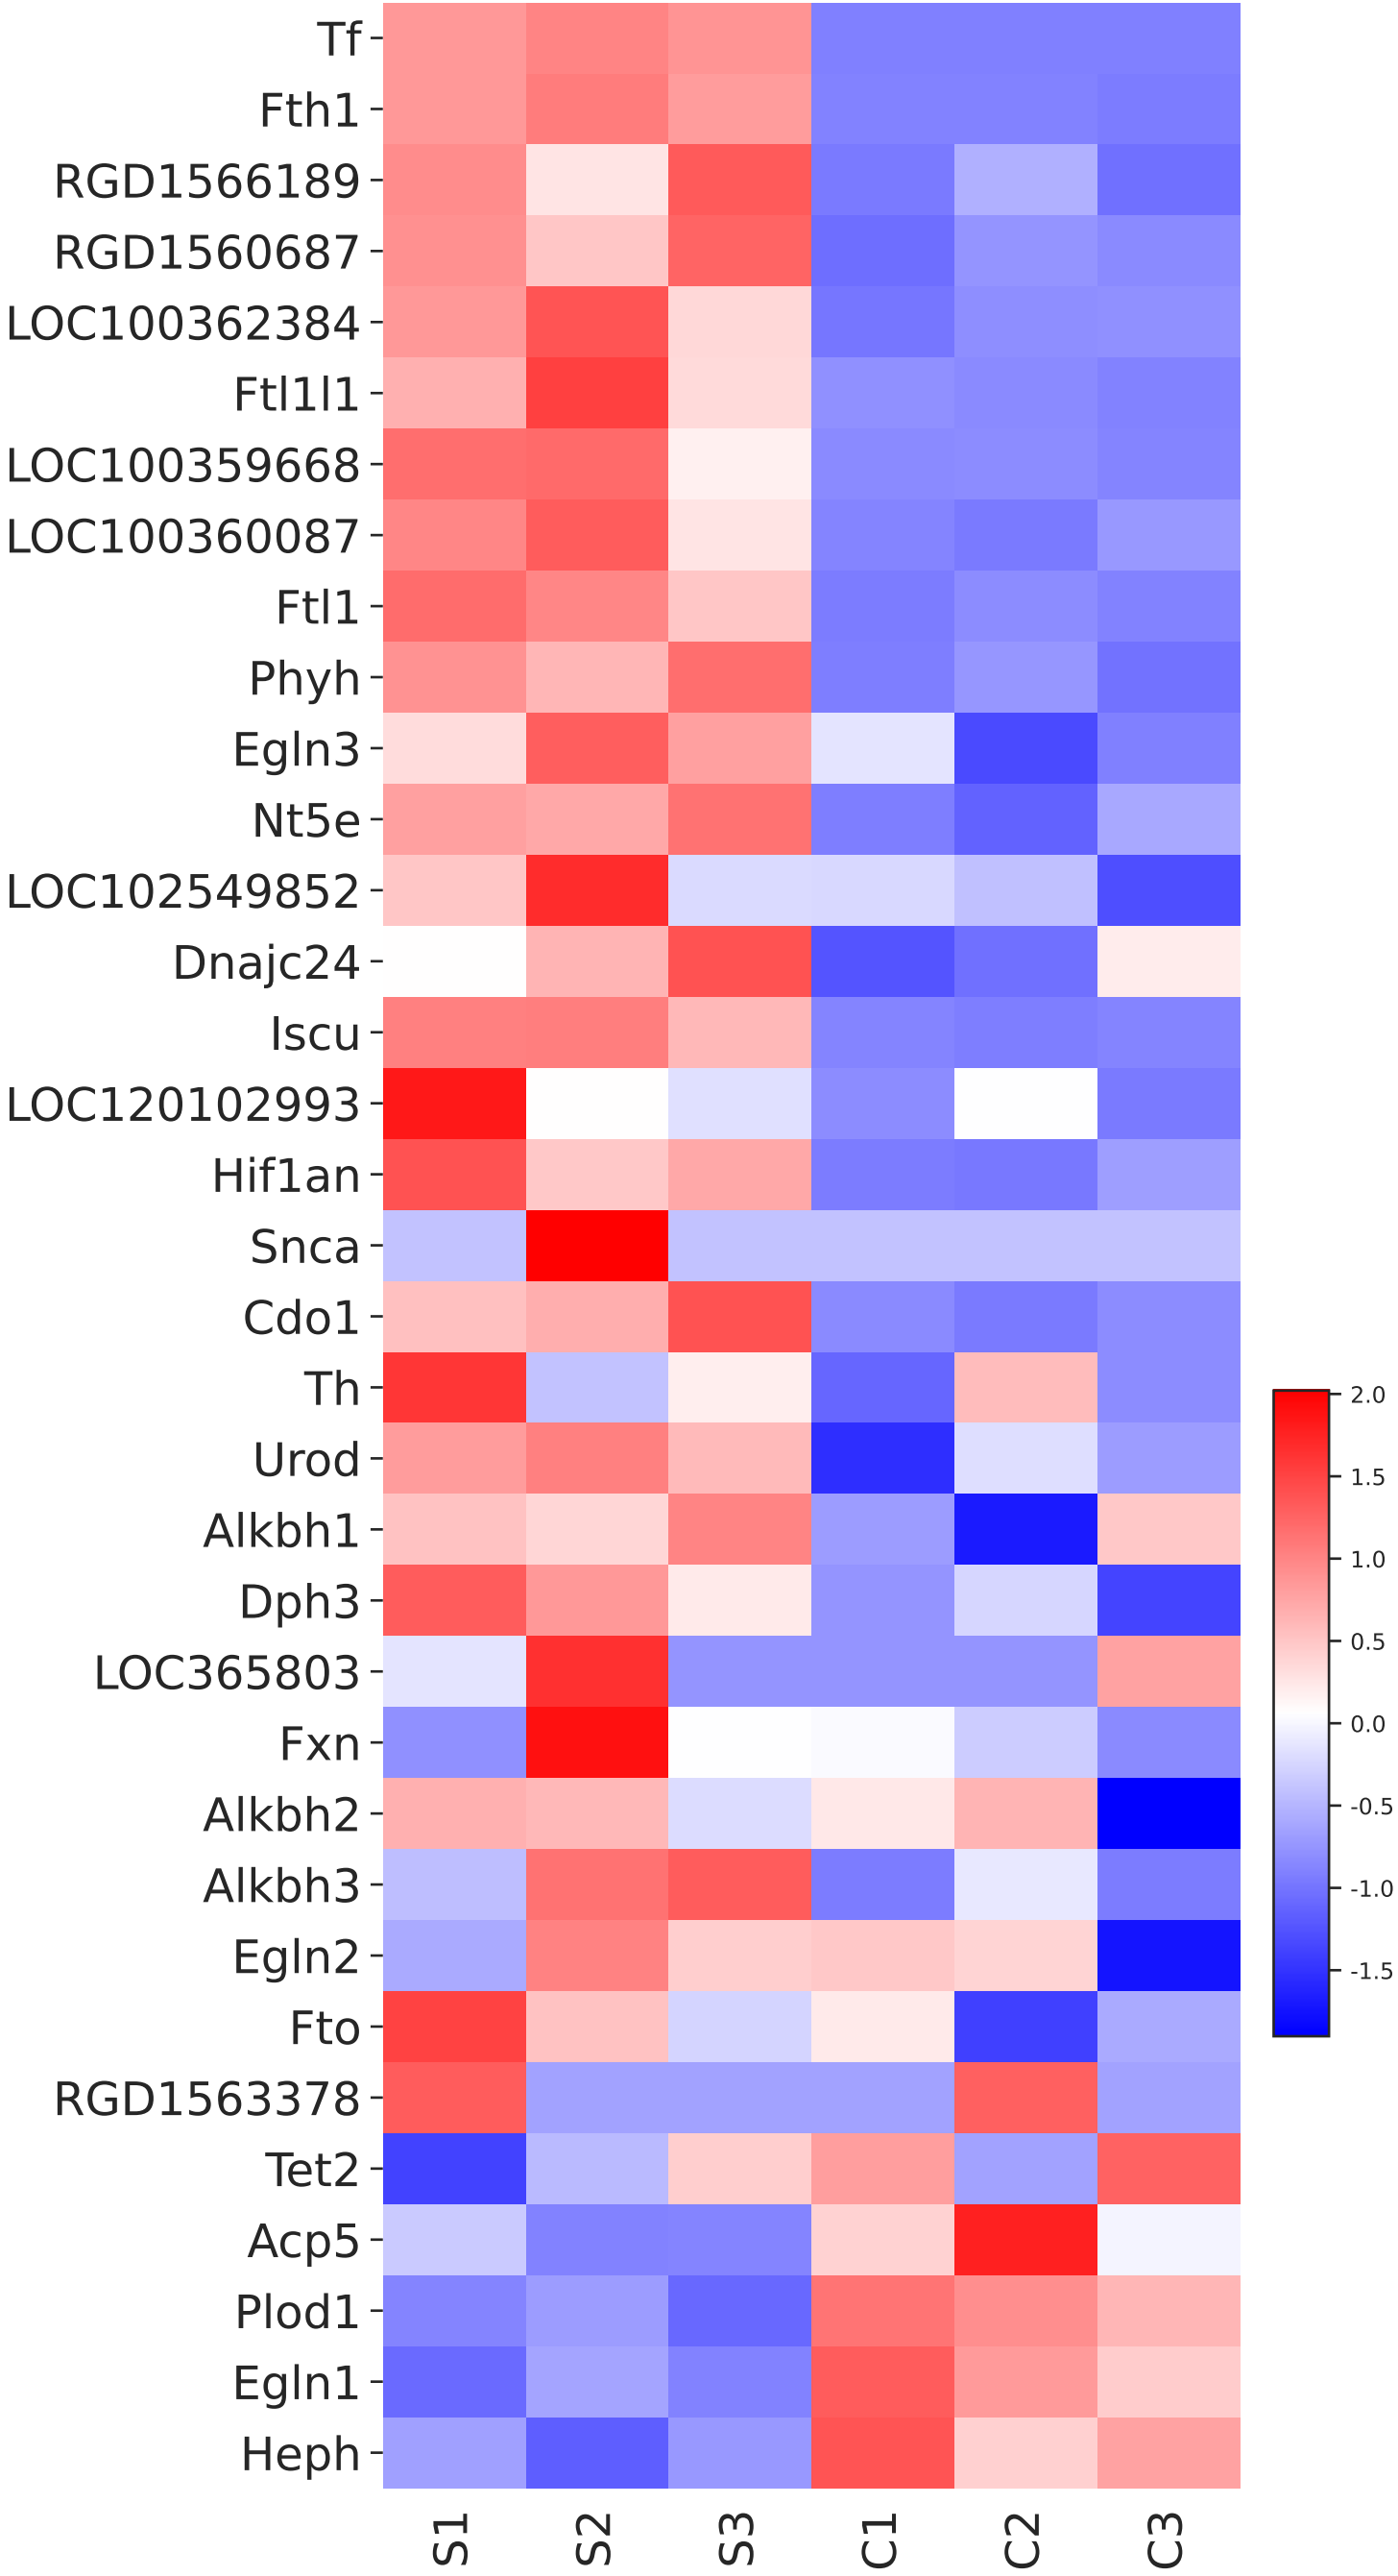

Supplement: Supplementary file 124 [file 5_ferrous iron binding(GO_0008198).heatmap.pdf › Source data/1.RNA-Seq source data/1.BMSCs/result/1.6.GSEA/S-vs-C/go/MF/5_ferrous iron binding(GO_0008198).heatmap.pdf]

# C2H2 zinc finger domain binding(GO:0070742)

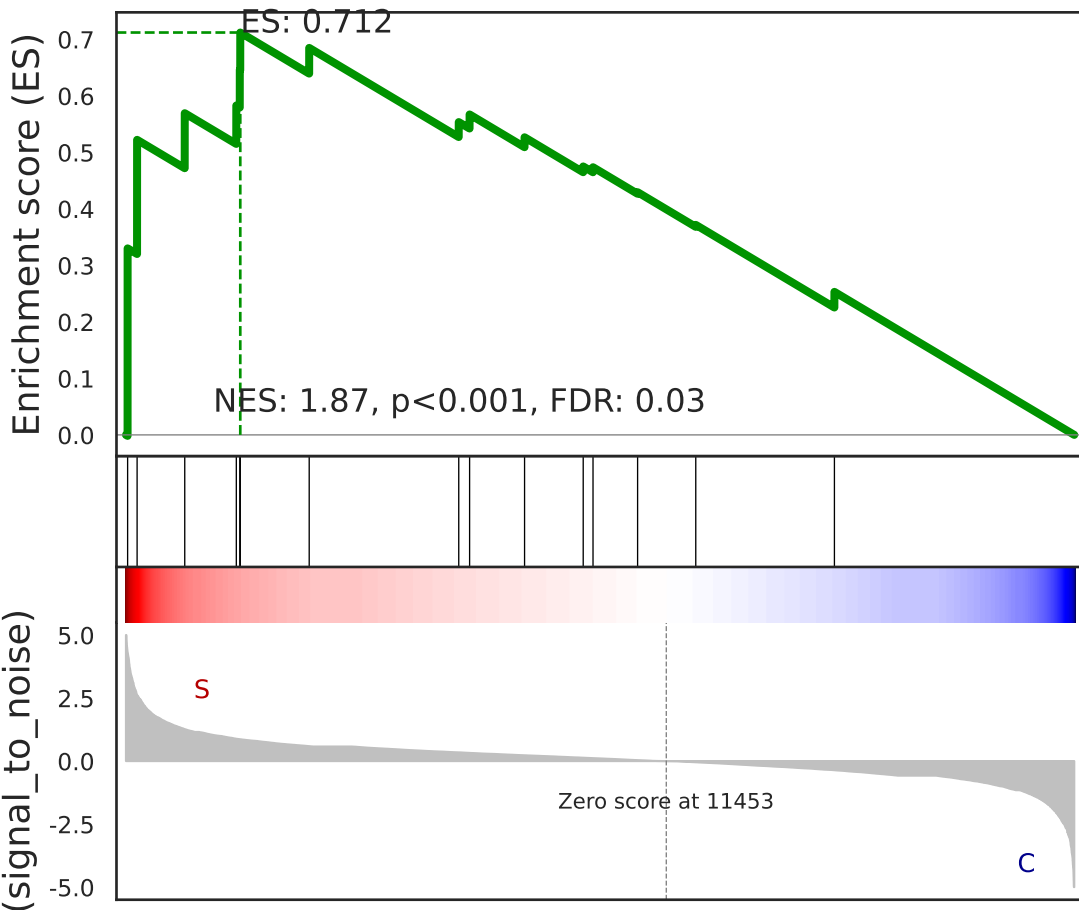

Supplement: Supplementary file 125 [file 6_C2H2 zinc finger domain binding(GO_0070742).gsea.pdf › Source data/1.RNA-Seq source data/1.BMSCs/result/1.6.GSEA/S-vs-C/go/MF/6_C2H2 zinc finger domain binding(GO_0070742).gsea.pdf]

# C2H2 zinc finger domain binding(GO:0070742)

## Heatmap of the Analyzed GeneSet

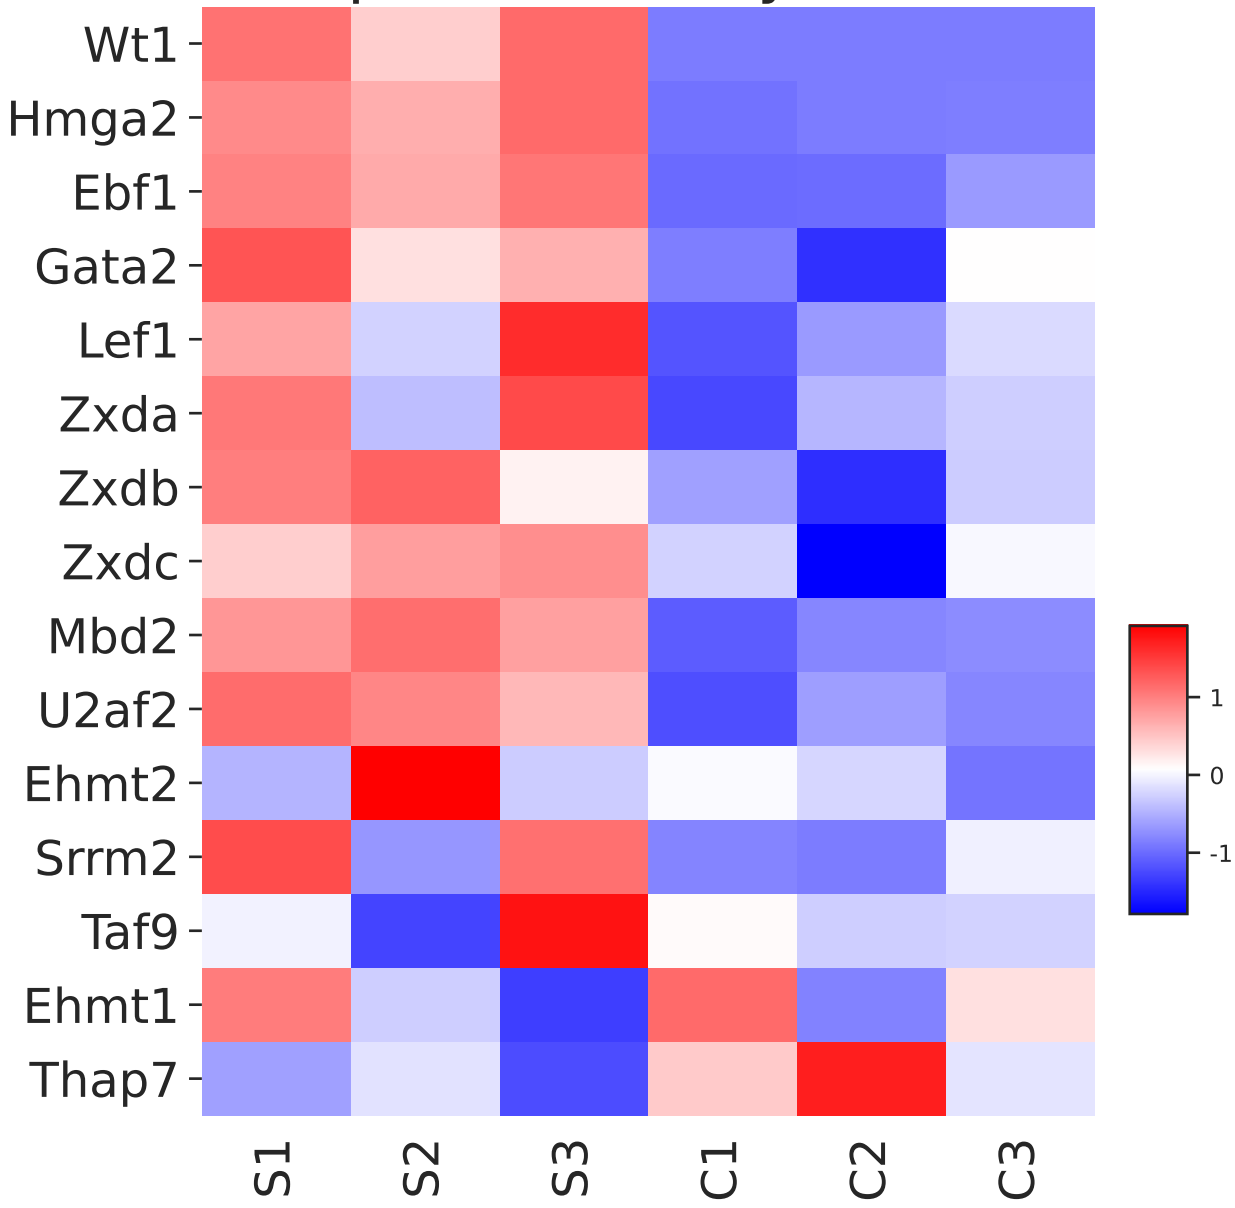

Supplement: Supplementary file 126 [file 6_C2H2 zinc finger domain binding(GO_0070742).heatmap.pdf › Source data/1.RNA-Seq source data/1.BMSCs/result/1.6.GSEA/S-vs-C/go/MF/6_C2H2 zinc finger domain binding(GO_0070742).heatmap.pdf]

# alditol:NADP+ 1-oxidoreductase activity(GO:0004032)

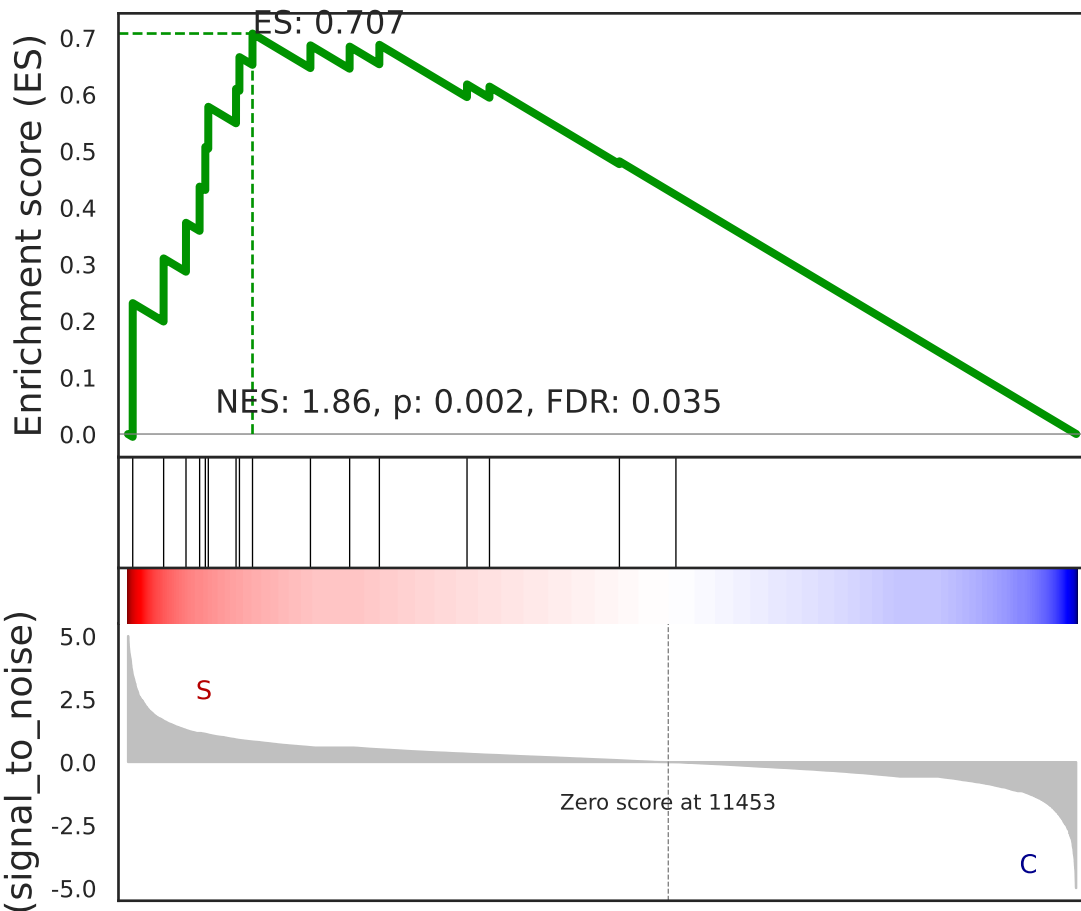

Supplement: Supplementary file 127 [file 7_alditol_NADP+ 1-oxidoreductase activity(GO_0004032).gsea.pdf › Source data/1.RNA-Seq source data/1.BMSCs/result/1.6.GSEA/S-vs-C/go/MF/7_alditol_NADP+ 1-oxidoreductase activity(GO_0004032).gsea.pdf]

alditol:NADP+ 1-oxidoreductase activity(GO:0004032)

Heatmap of the Analyzed GeneSet

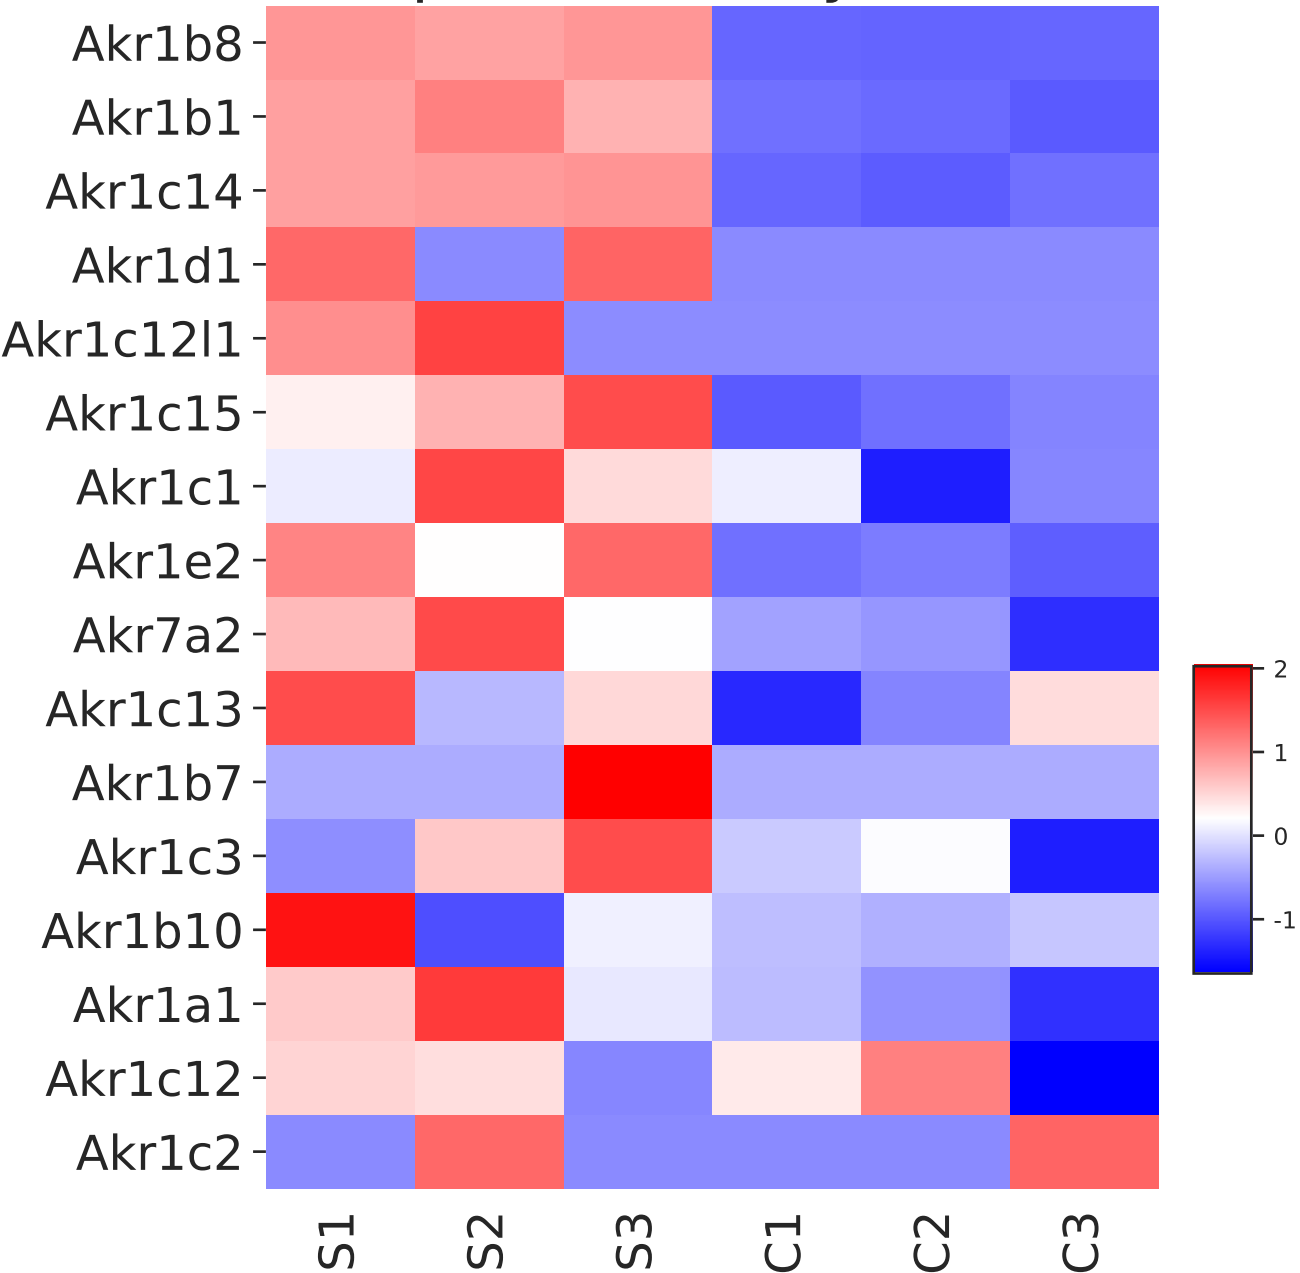

Supplement: Supplementary file 128 [file 7_alditol_NADP+ 1-oxidoreductase activity(GO_0004032).heatmap.pdf › Source data/1.RNA-Seq source data/1.BMSCs/result/1.6.GSEA/S-vs-C/go/MF/7_alditol_NADP+ 1-oxidoreductase activity(GO_0004032).heatmap.pdf]

# single-stranded DNA binding(GO:0003697)

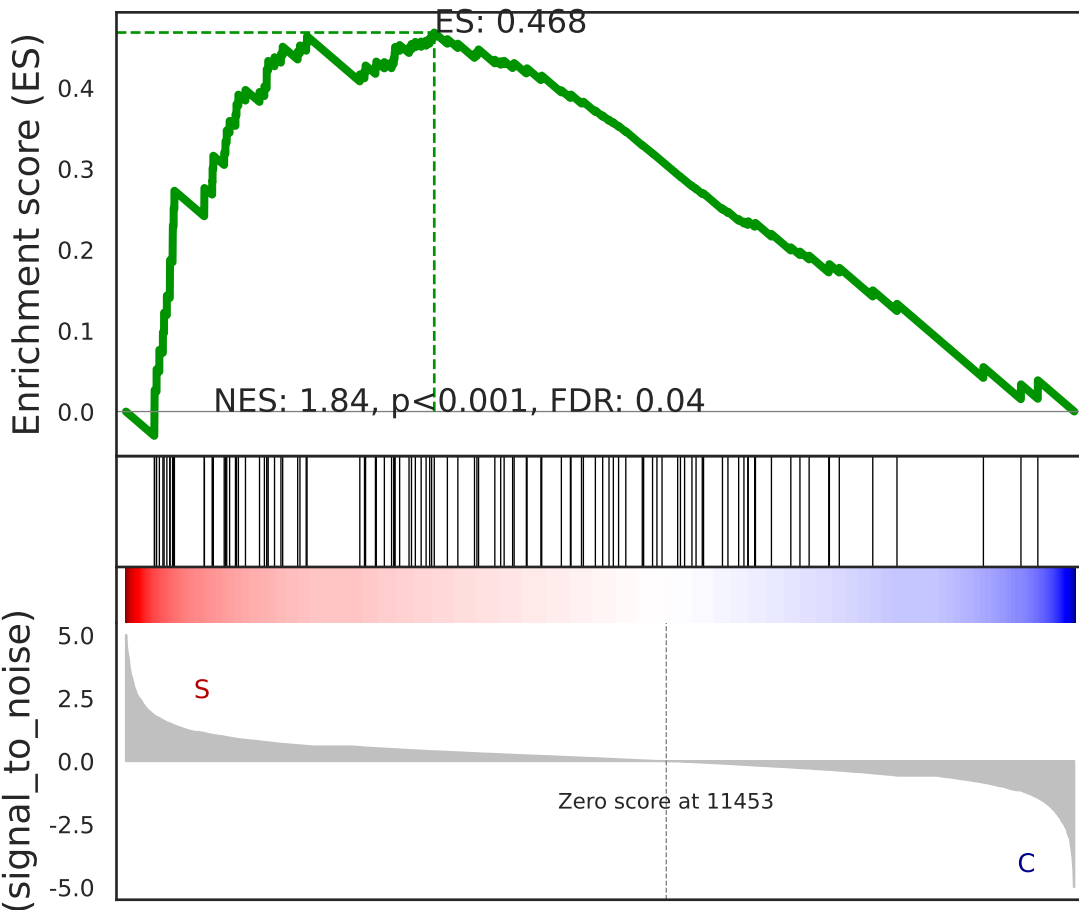

Supplement: Supplementary file 129 [file 8_single-stranded DNA binding(GO_0003697).gsea.pdf › Source data/1.RNA-Seq source data/1.BMSCs/result/1.6.GSEA/S-vs-C/go/MF/8_single-stranded DNA binding(GO_0003697).gsea.pdf]

single-stranded DNA binding(GO:0003697)  
Heatmap of the Analyzed GeneSet

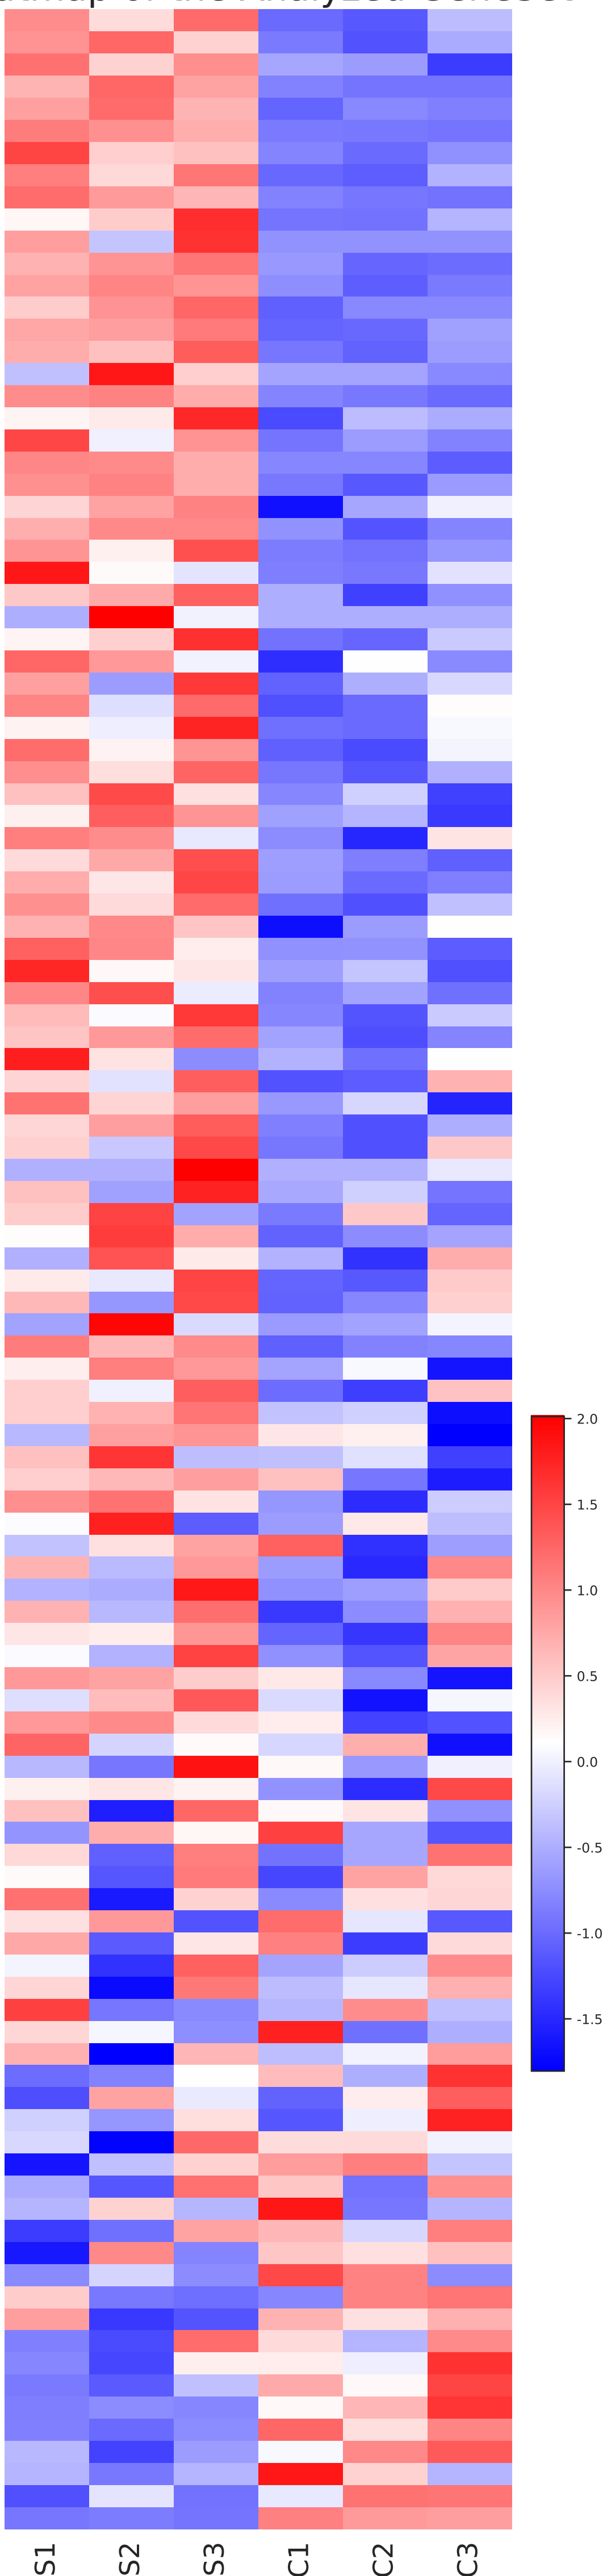

Supplement: Supplementary file 130 [file 8_single-stranded DNA binding(GO_0003697).heatmap.pdf › Source data/1.RNA-Seq source data/1.BMSCs/result/1.6.GSEA/S-vs-C/go/MF/8_single-stranded DNA binding(GO_0003697).heatmap.pdf]

# nucleotidyltransferase activity(GO:0016779)

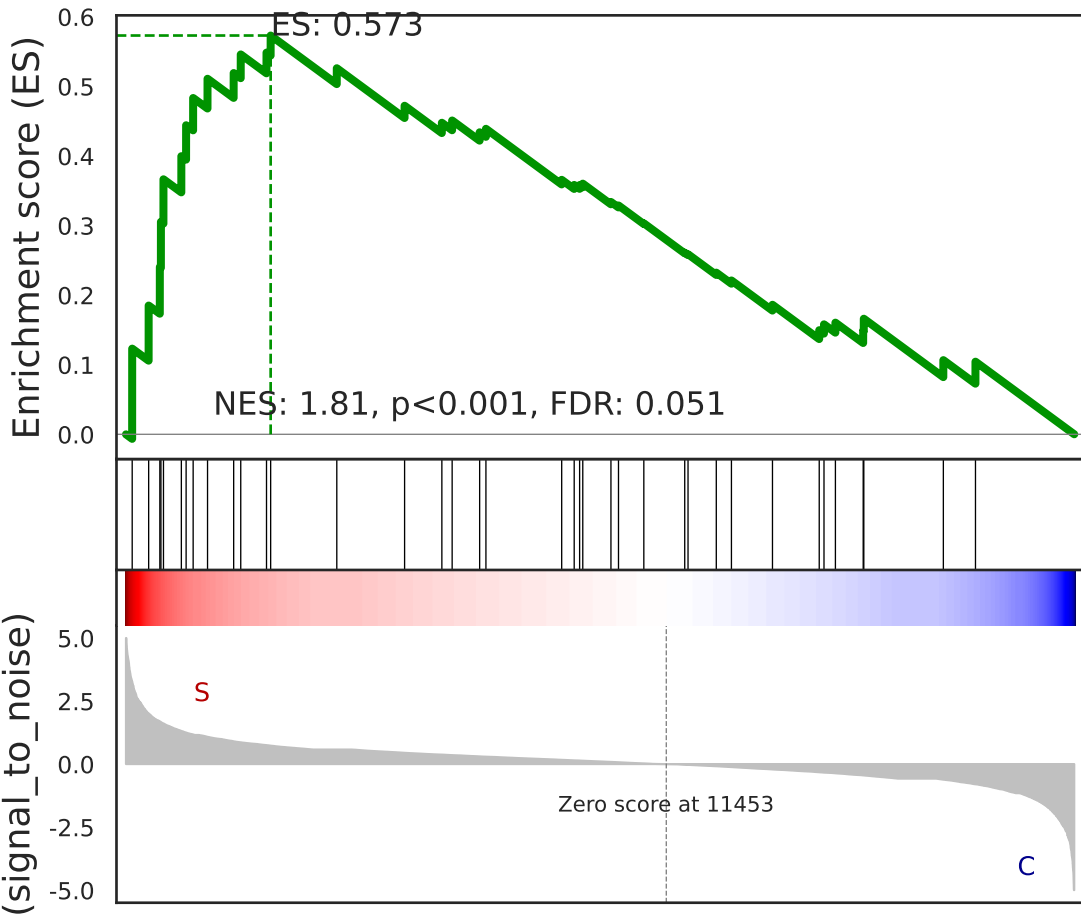

Supplement: Supplementary file 131 [file 9_nucleotidyltransferase activity(GO_0016779).gsea.pdf › Source data/1.RNA-Seq source data/1.BMSCs/result/1.6.GSEA/S-vs-C/go/MF/9_nucleotidyltransferase activity(GO_0016779).gsea.pdf]

# nucleotidyltransferase activity(GO:0016779)

## Heatmap of the Analyzed GeneSet

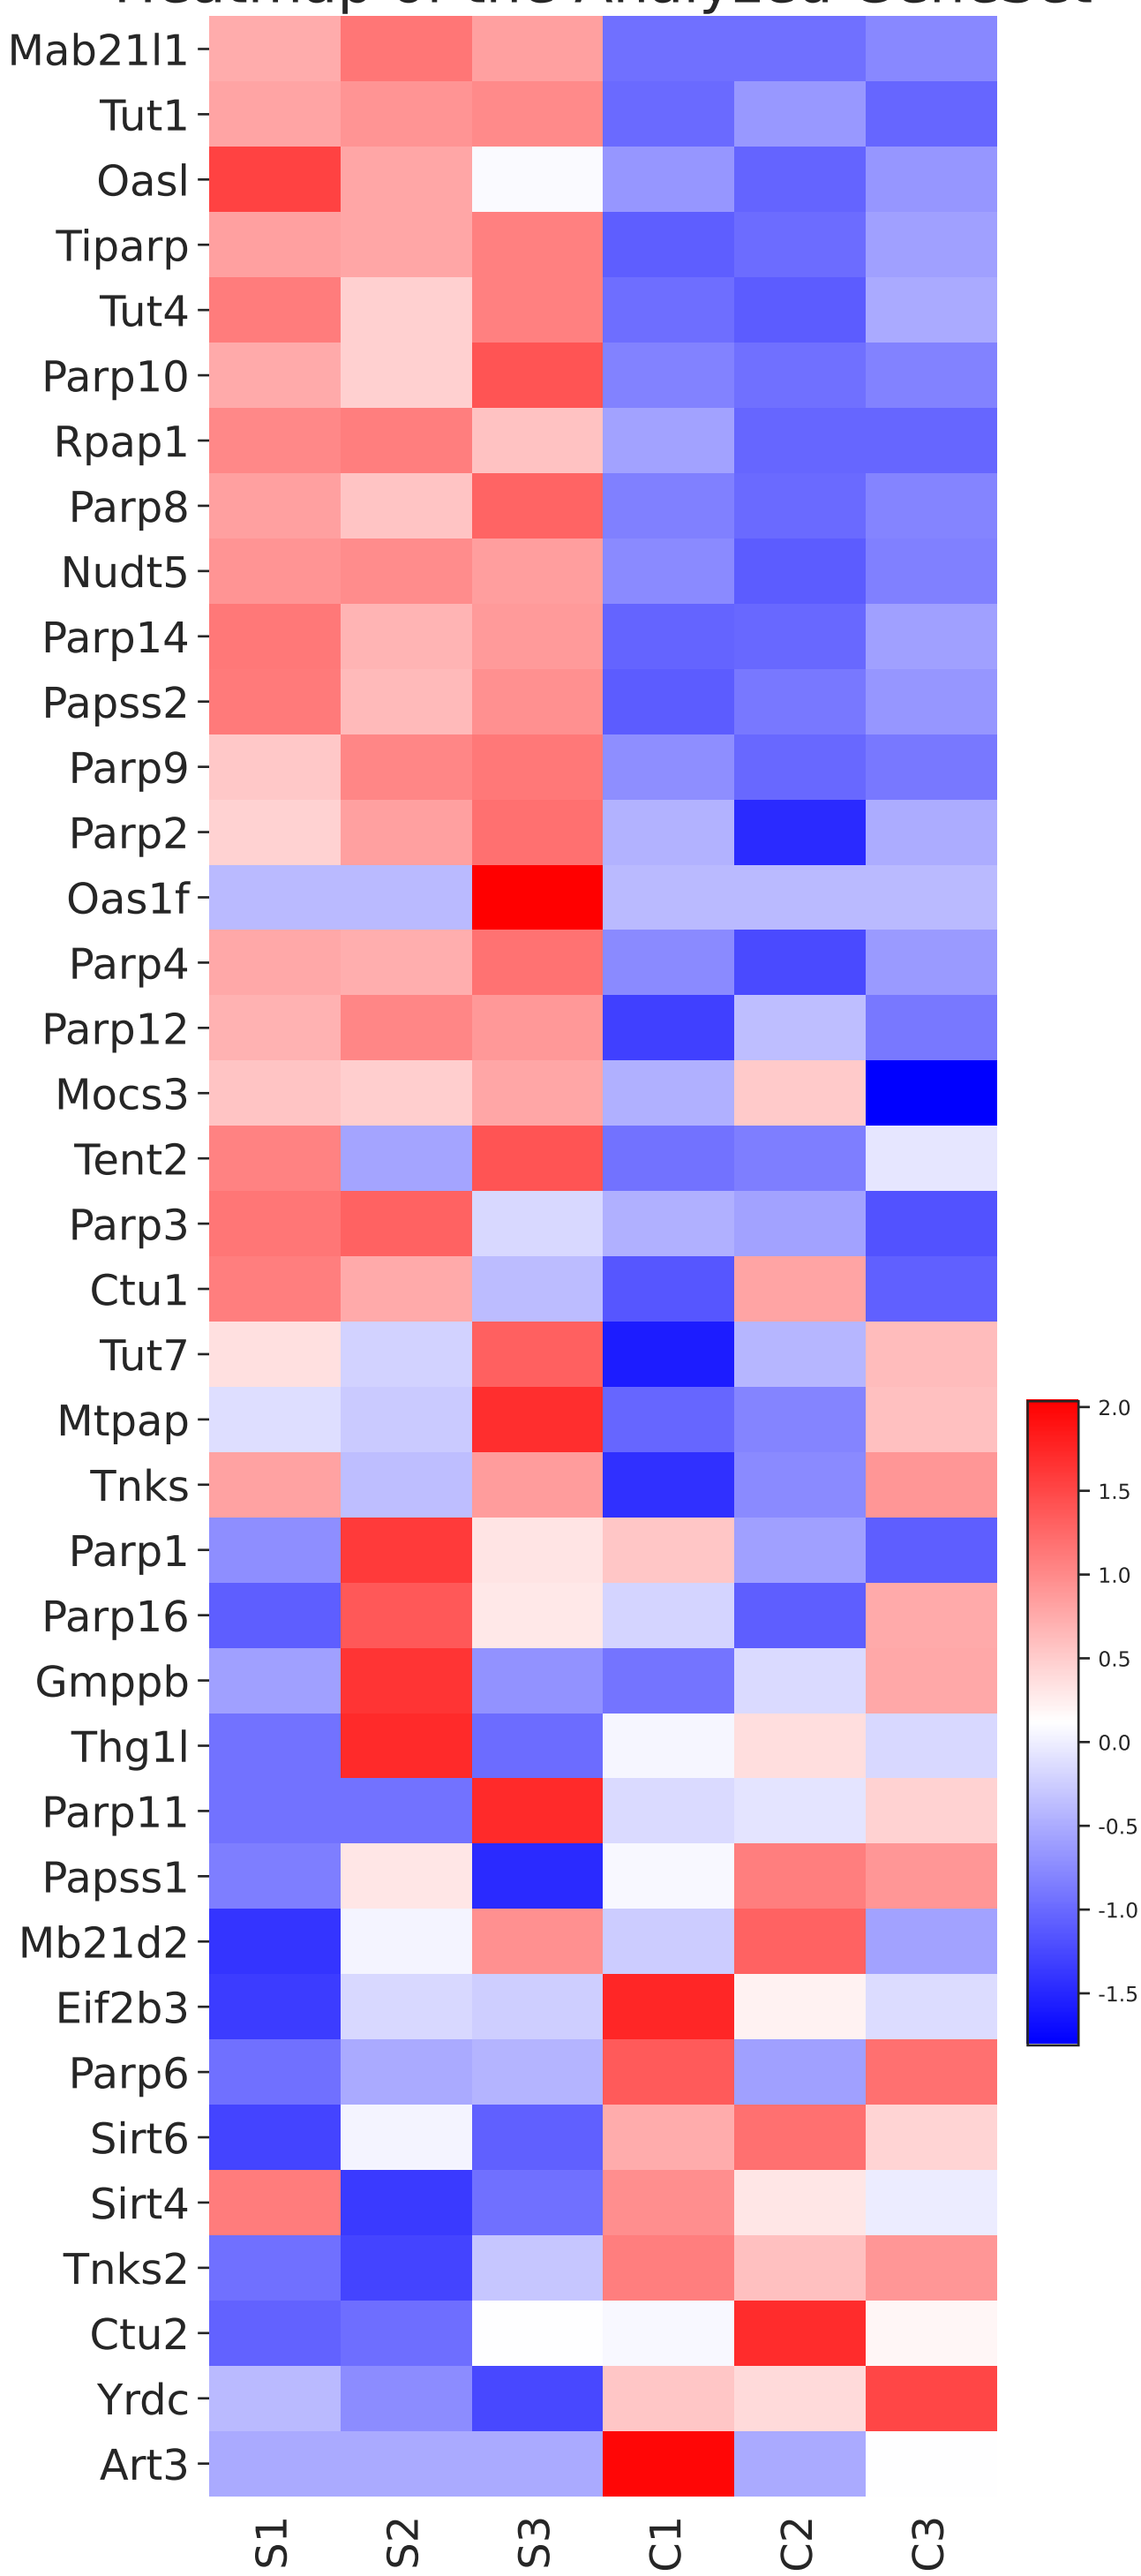

Supplement: Supplementary file 132 [file 9_nucleotidyltransferase activity(GO_0016779).heatmap.pdf › Source data/1.RNA-Seq source data/1.BMSCs/result/1.6.GSEA/S-vs-C/go/MF/9_nucleotidyltransferase activity(GO_0016779).heatmap.pdf]

# Mismatch repair(rno03430)

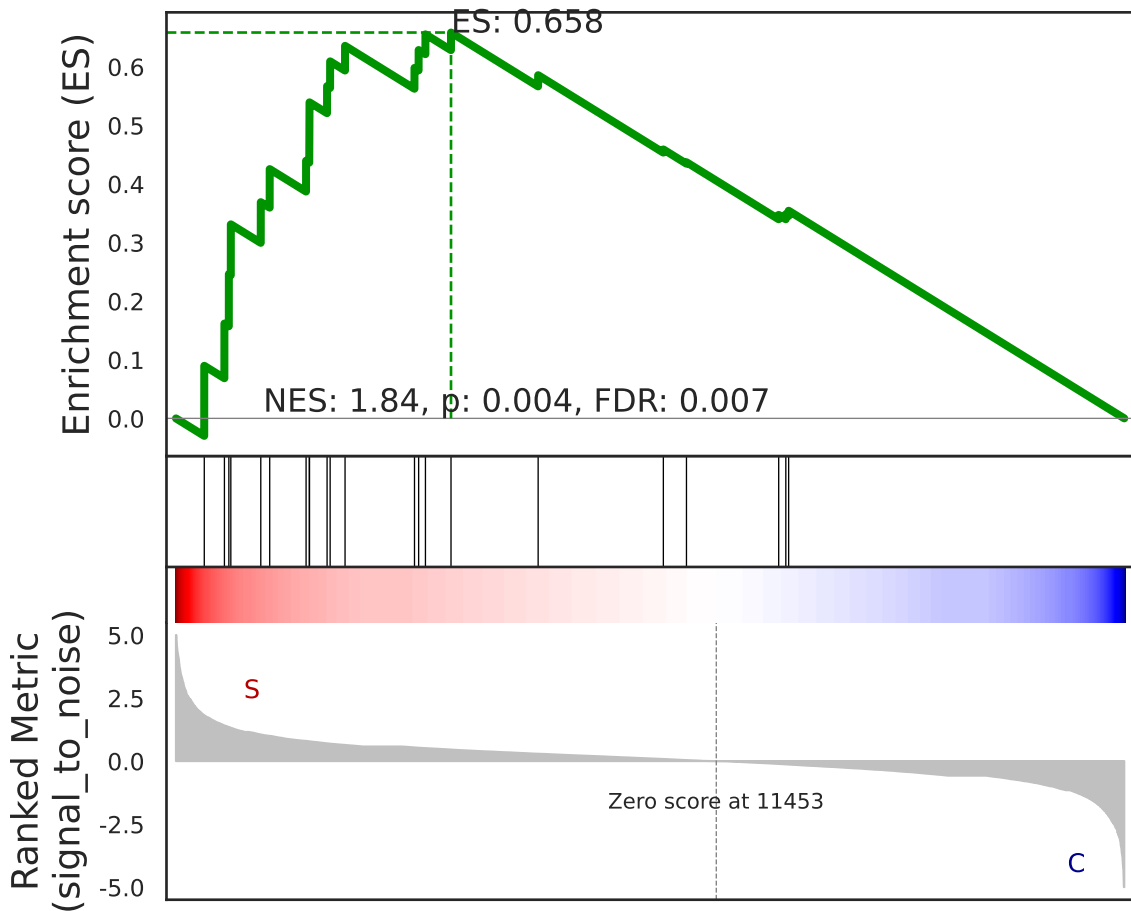

Supplement: Supplementary file 133 [file 10_Mismatch repair(rno03430).gsea.pdf › Source data/1.RNA-Seq source data/1.BMSCs/result/1.6.GSEA/S-vs-C/kegg/10_Mismatch repair(rno03430).gsea.pdf]

# Mismatch repair(rno03430)

## Heatmap of the Analyzed GeneSet

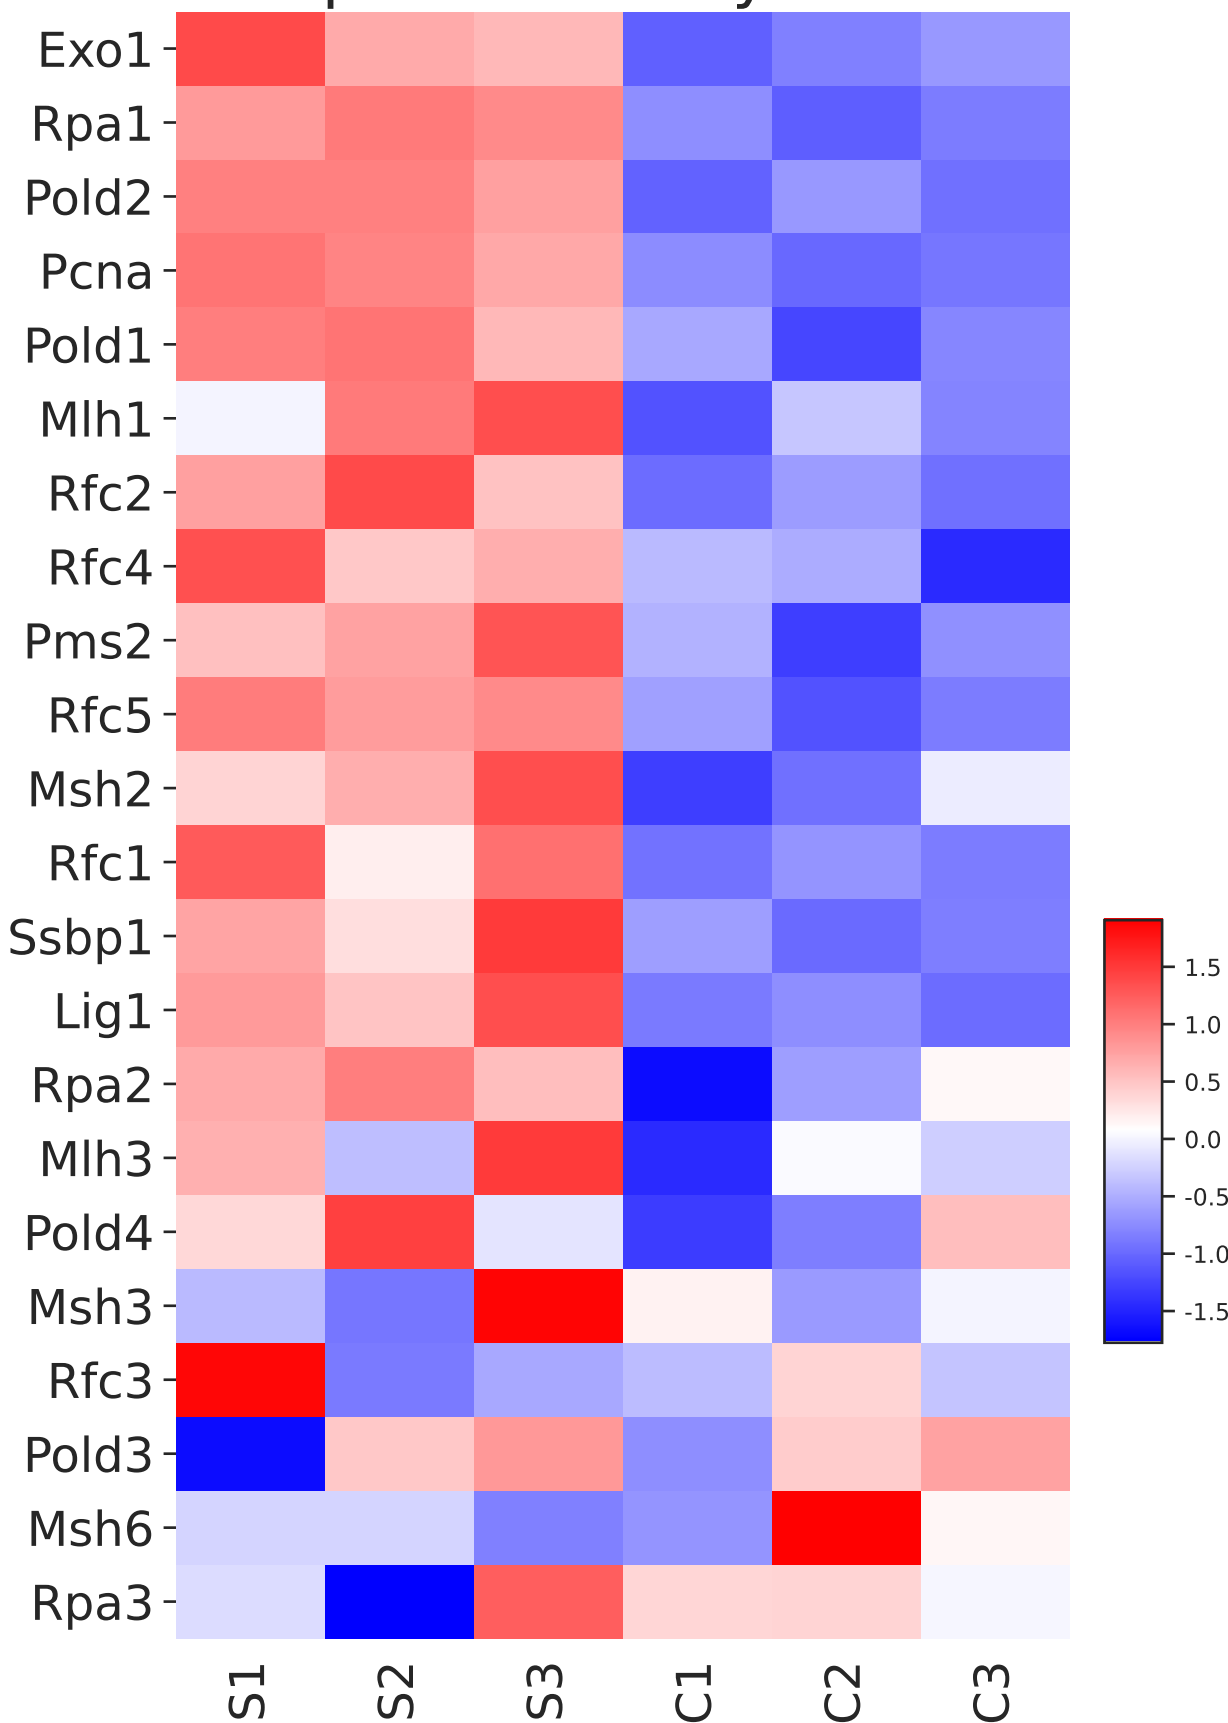

Supplement: Supplementary file 134 [file 10_Mismatch repair(rno03430).heatmap.pdf › Source data/1.RNA-Seq source data/1.BMSCs/result/1.6.GSEA/S-vs-C/kegg/10_Mismatch repair(rno03430).heatmap.pdf]

# Drug metabolism - cytochrome P450(rno00982)

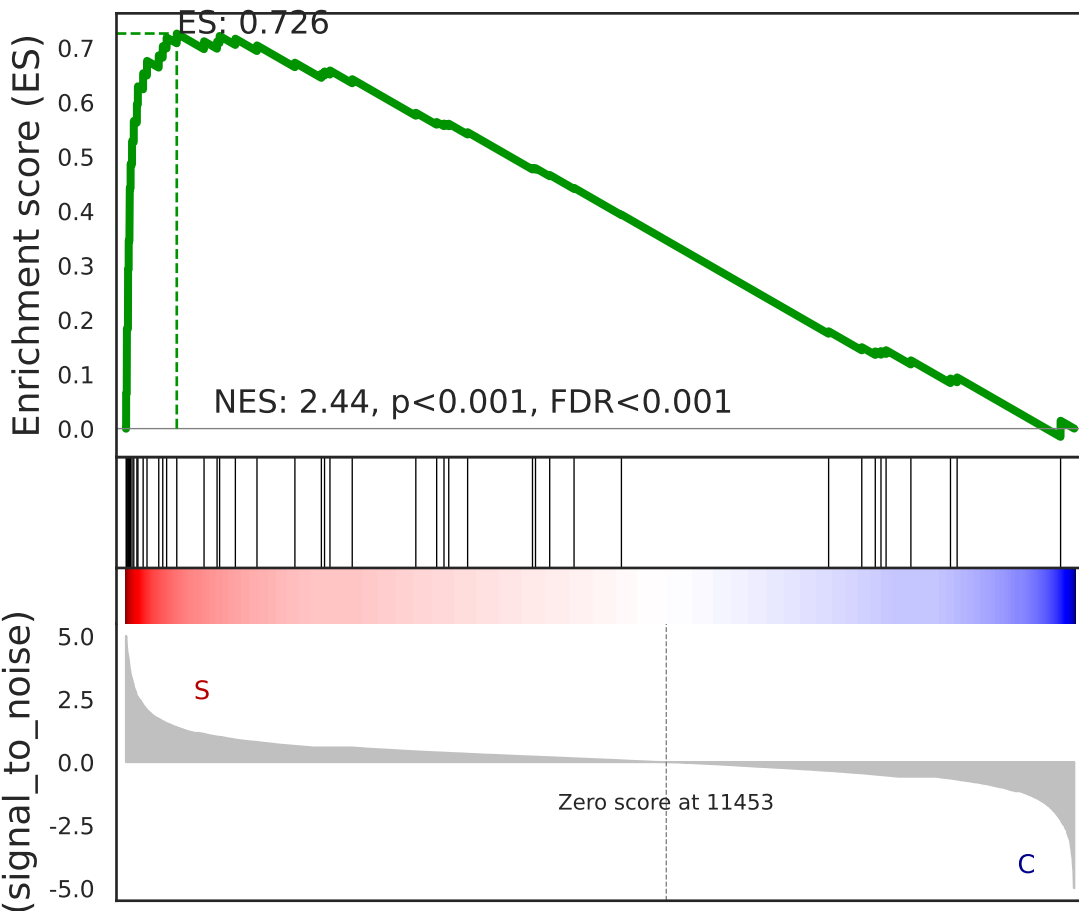

Supplement: Supplementary file 135 [file 1_Drug metabolism - cytochrome P450(rno00982).gsea.pdf › Source data/1.RNA-Seq source data/1.BMSCs/result/1.6.GSEA/S-vs-C/kegg/1_Drug metabolism - cytochrome P450(rno00982).gsea.pdf]

# Drug metabolism - cytochrome P450(rno00982)

## Heatmap of the Analyzed GeneSet

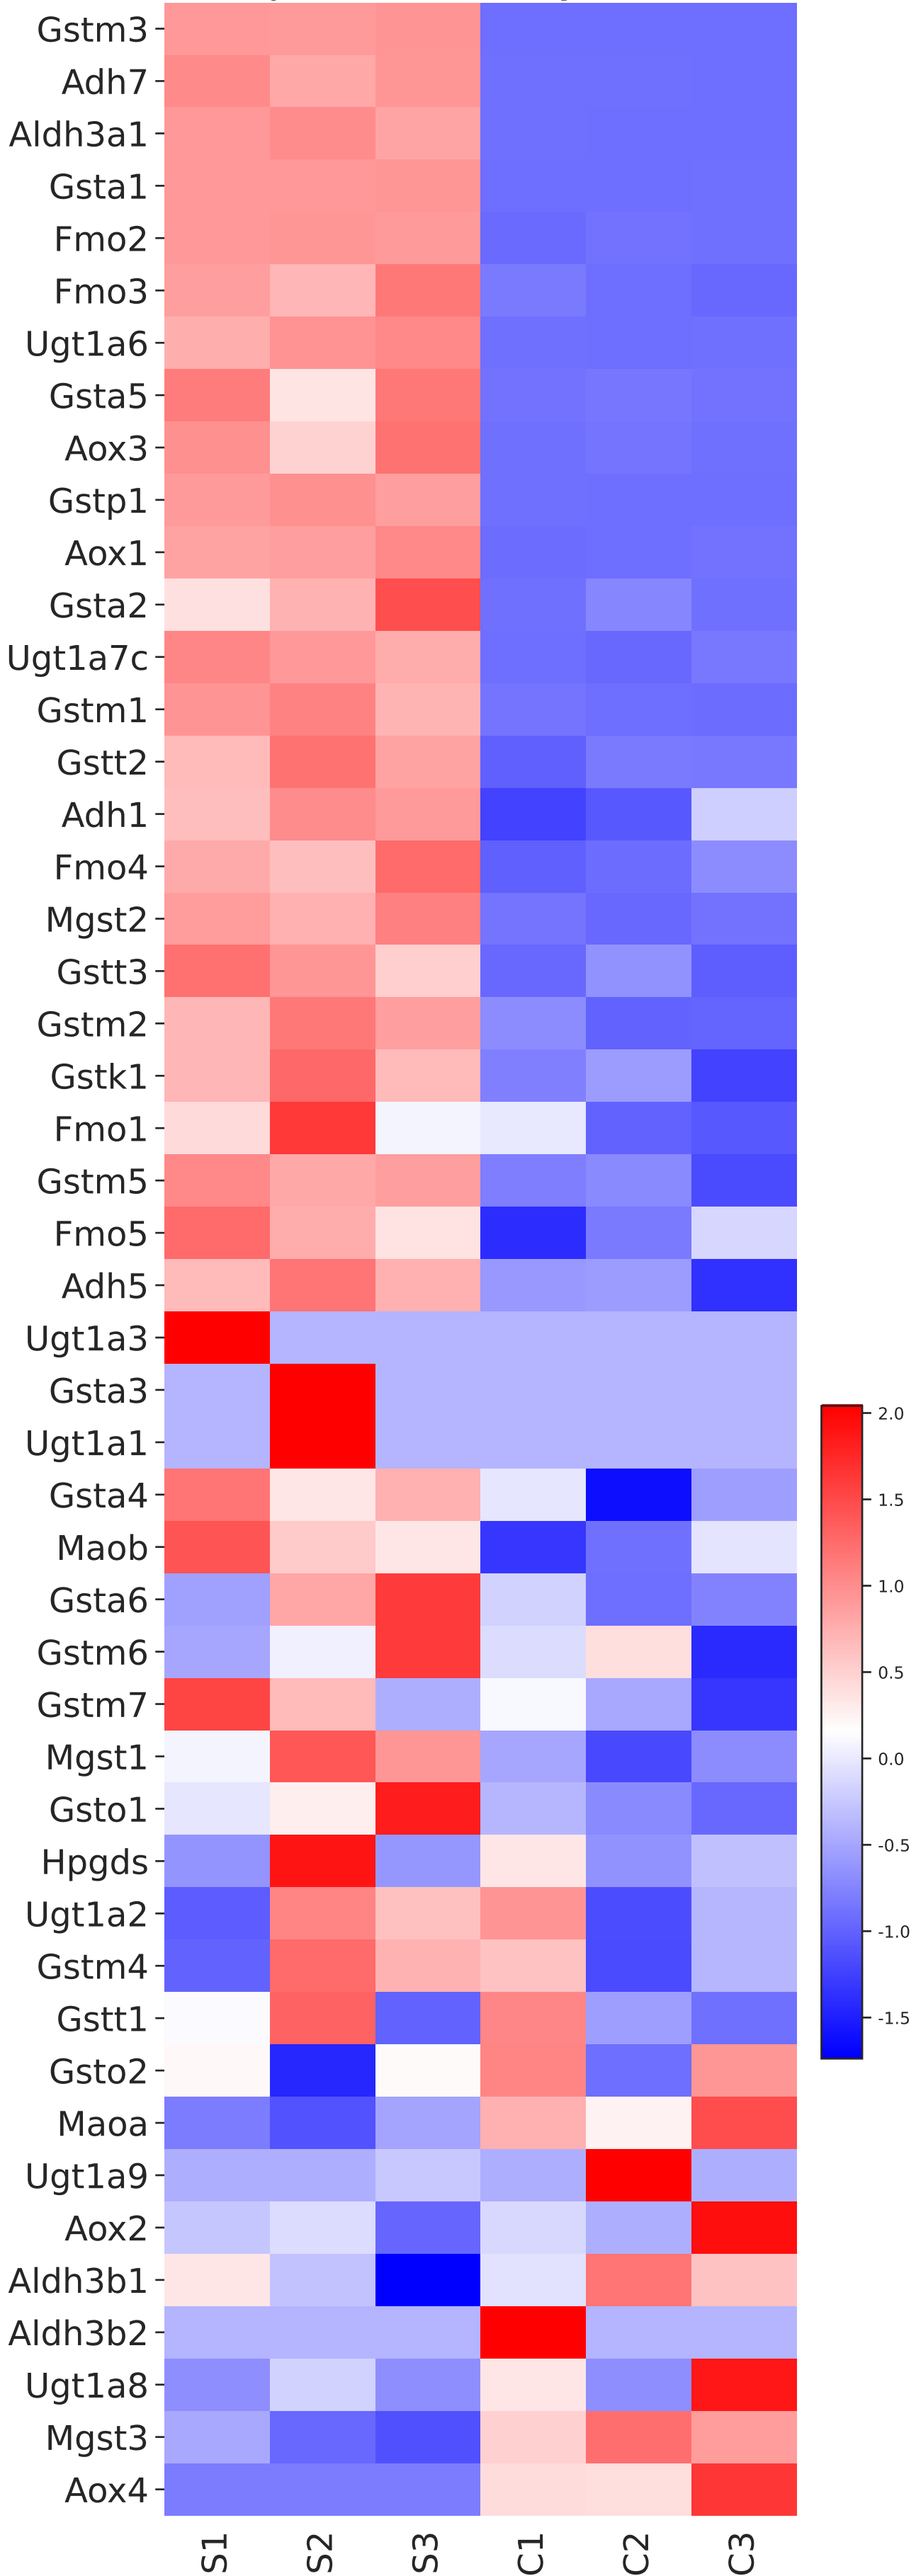

Supplement: Supplementary file 136 [file 1_Drug metabolism - cytochrome P450(rno00982).heatmap.pdf › Source data/1.RNA-Seq source data/1.BMSCs/result/1.6.GSEA/S-vs-C/kegg/1_Drug metabolism - cytochrome P450(rno00982).heatmap.pdf]

# Metabolism of xenobiotics by cytochrome P450(rno00980)

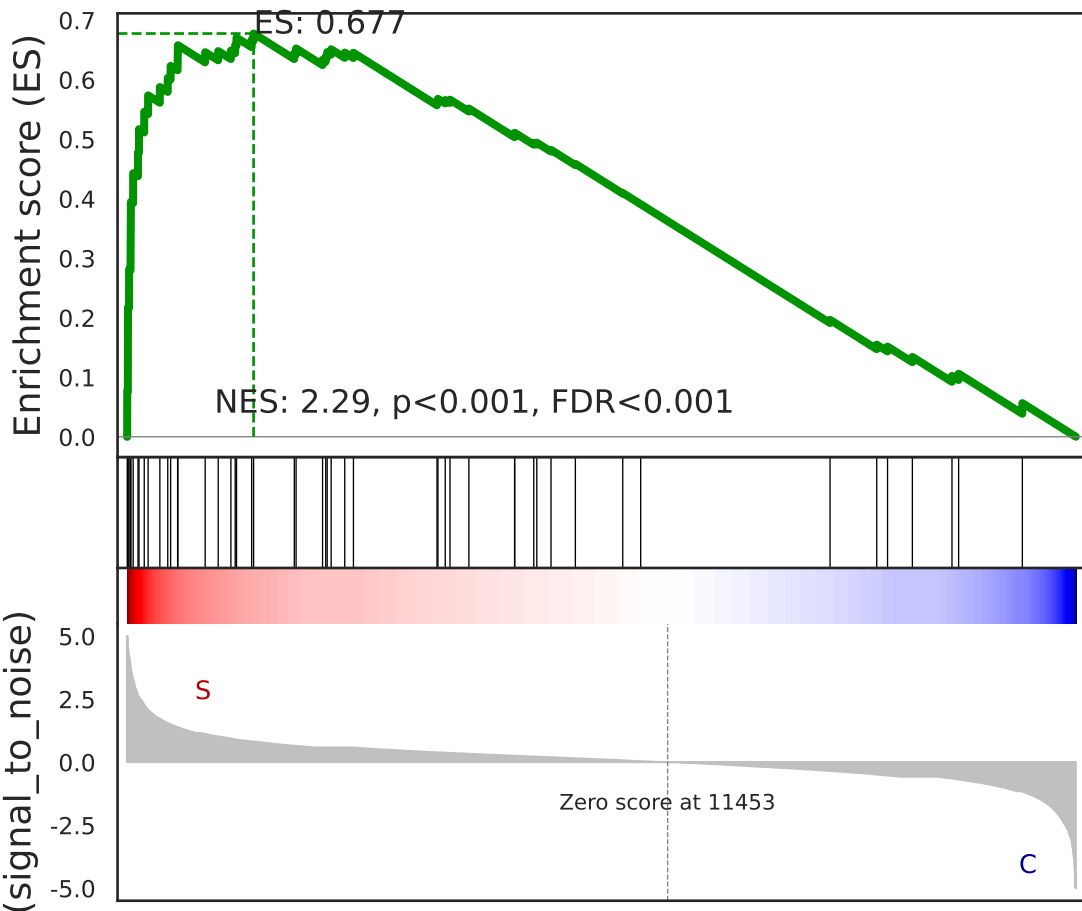

Supplement: Supplementary file 137 [file 2_Metabolism of xenobiotics by cytochrome P450(rno00980).gsea.pdf › Source data/1.RNA-Seq source data/1.BMSCs/result/1.6.GSEA/S-vs-C/kegg/2_Metabolism of xenobiotics by cytochrome P450(rno00980).gsea.pdf]

Metabolism of xenobiotics by cytochrome P450(rno00980)  
Heatmap of the Analyzed GeneSet

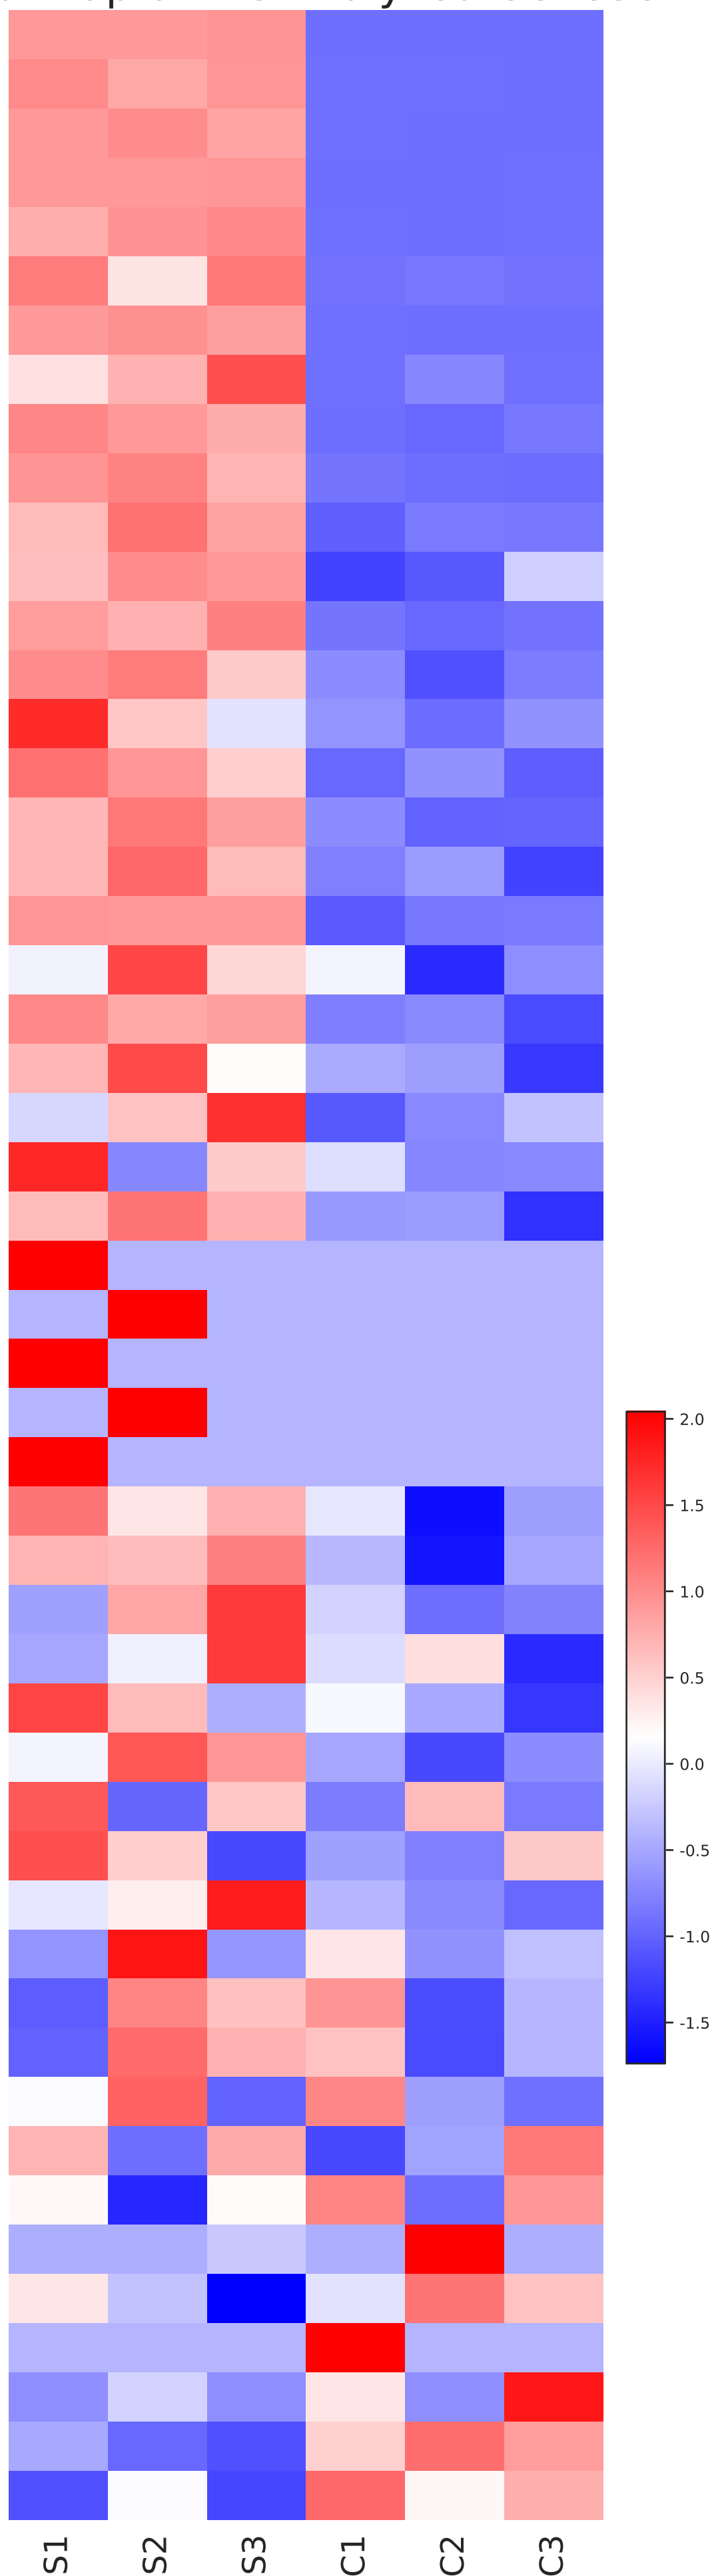

Supplement: Supplementary file 138 [file 2_Metabolism of xenobiotics by cytochrome P450(rno00980).heatmap.pdf › Source data/1.RNA-Seq source data/1.BMSCs/result/1.6.GSEA/S-vs-C/kegg/2_Metabolism of xenobiotics by cytochrome P450(rno00980).heatmap.pdf]

# Steroid biosynthesis(rno00100)

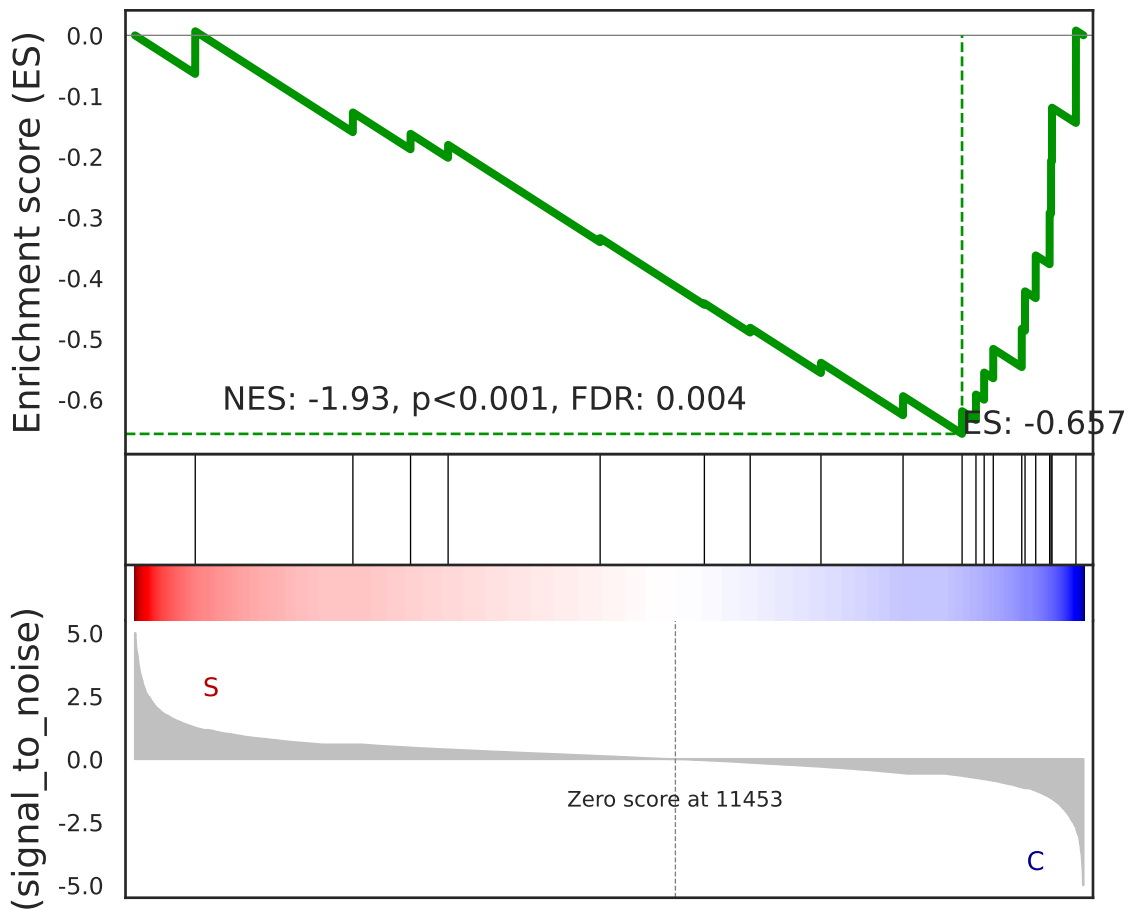

Supplement: Supplementary file 139 [file 307_Steroid biosynthesis(rno00100).gsea.pdf › Source data/1.RNA-Seq source data/1.BMSCs/result/1.6.GSEA/S-vs-C/kegg/307_Steroid biosynthesis(rno00100).gsea.pdf]

# Steroid biosynthesis(rno00100)

## Heatmap of the Analyzed GeneSet

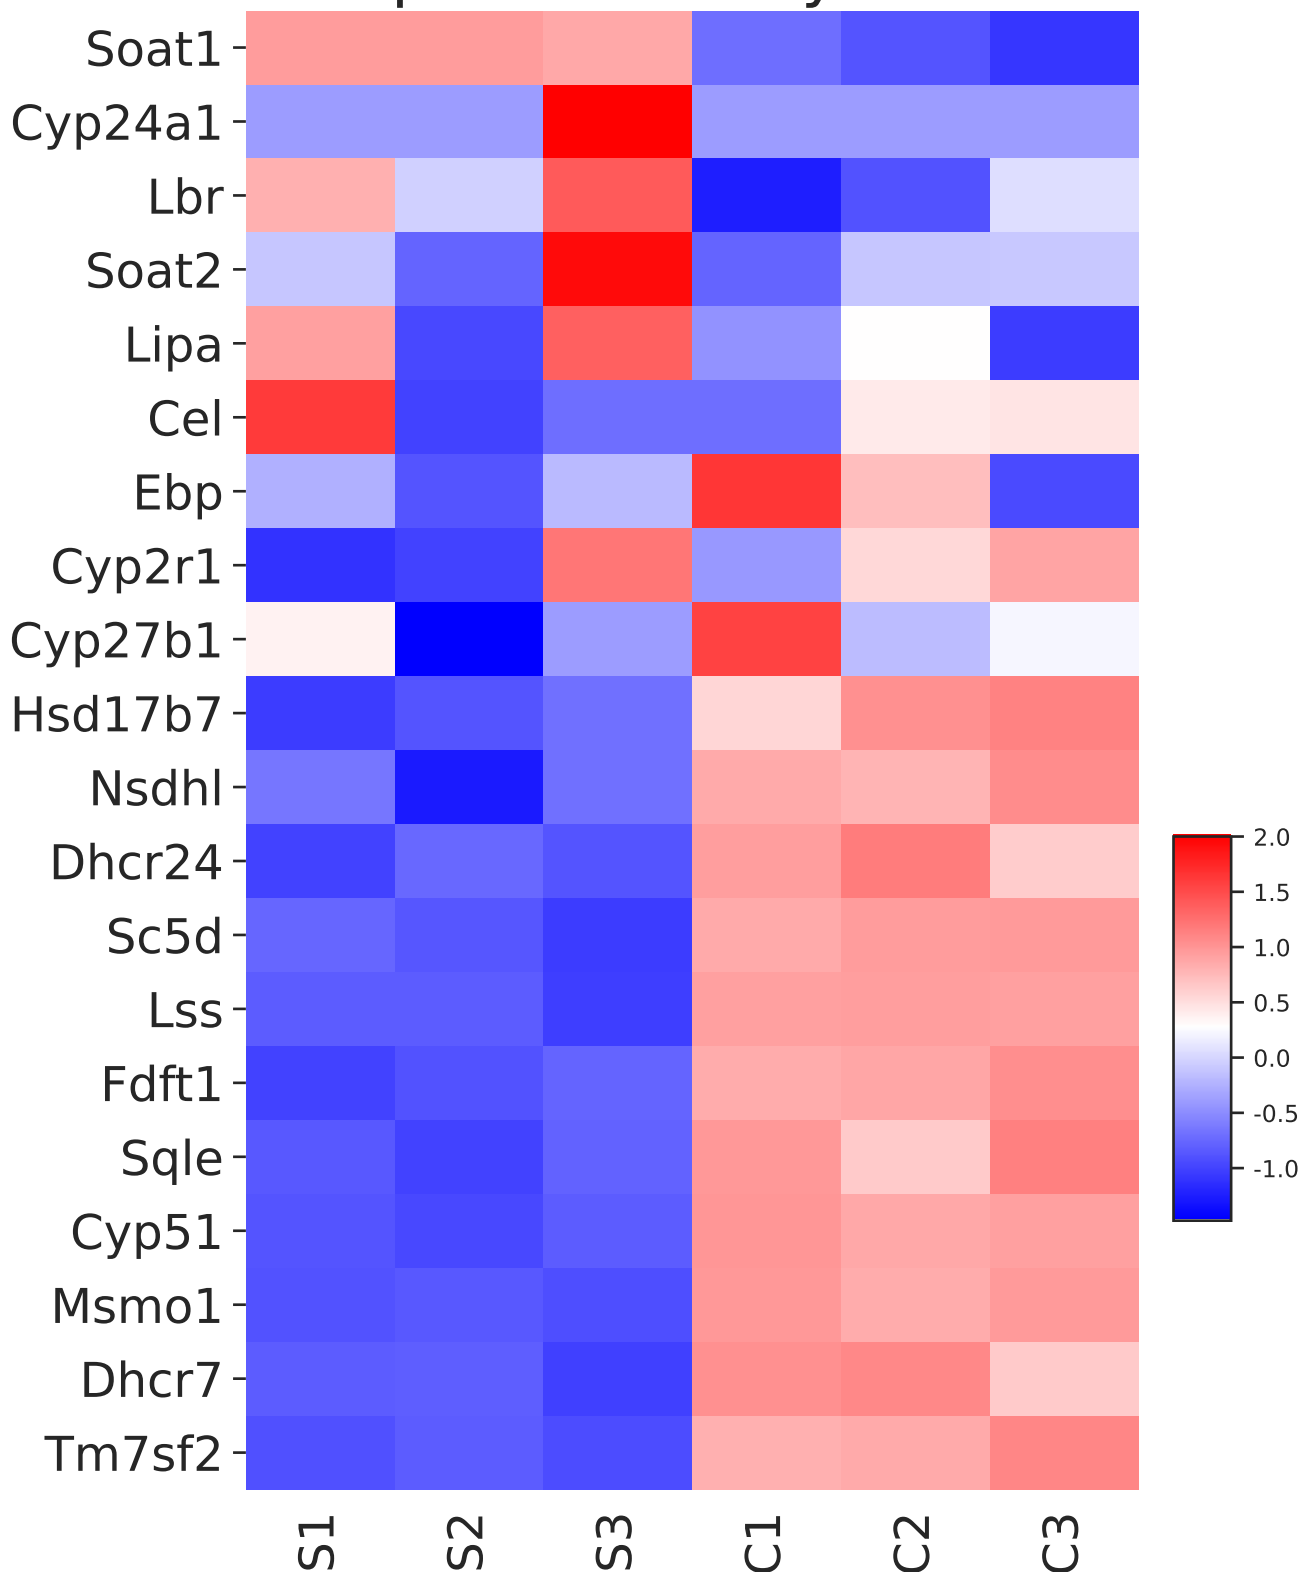

Supplement: Supplementary file 140 [file 307_Steroid biosynthesis(rno00100).heatmap.pdf › Source data/1.RNA-Seq source data/1.BMSCs/result/1.6.GSEA/S-vs-C/kegg/307_Steroid biosynthesis(rno00100).heatmap.pdf]

# TNF signaling pathway(rno04668)

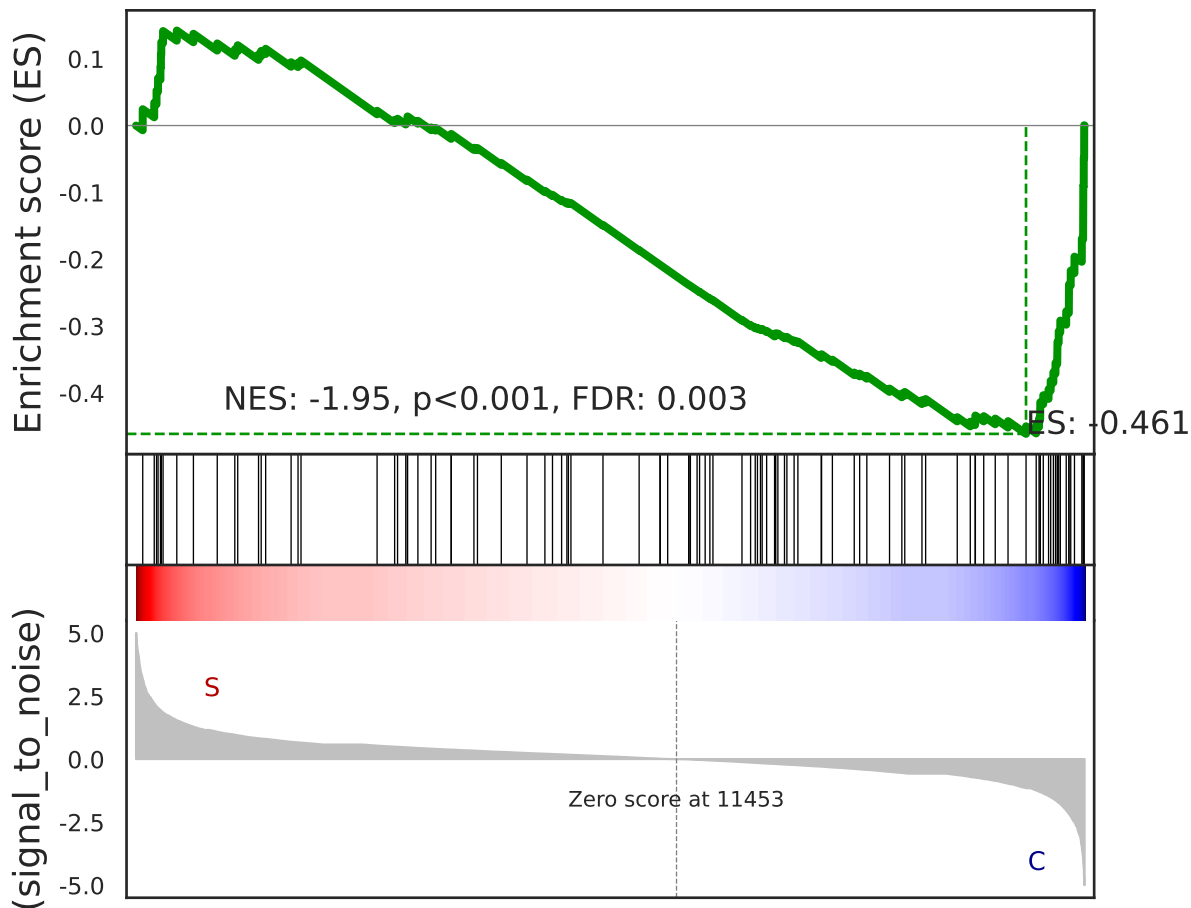

Supplement: Supplementary file 141 [file 308_TNF signaling pathway(rno04668).gsea.pdf › Source data/1.RNA-Seq source data/1.BMSCs/result/1.6.GSEA/S-vs-C/kegg/308_TNF signaling pathway(rno04668).gsea.pdf]

TNF signaling pathway(rno04668)  
Heatmap of the Analyzed GeneSet

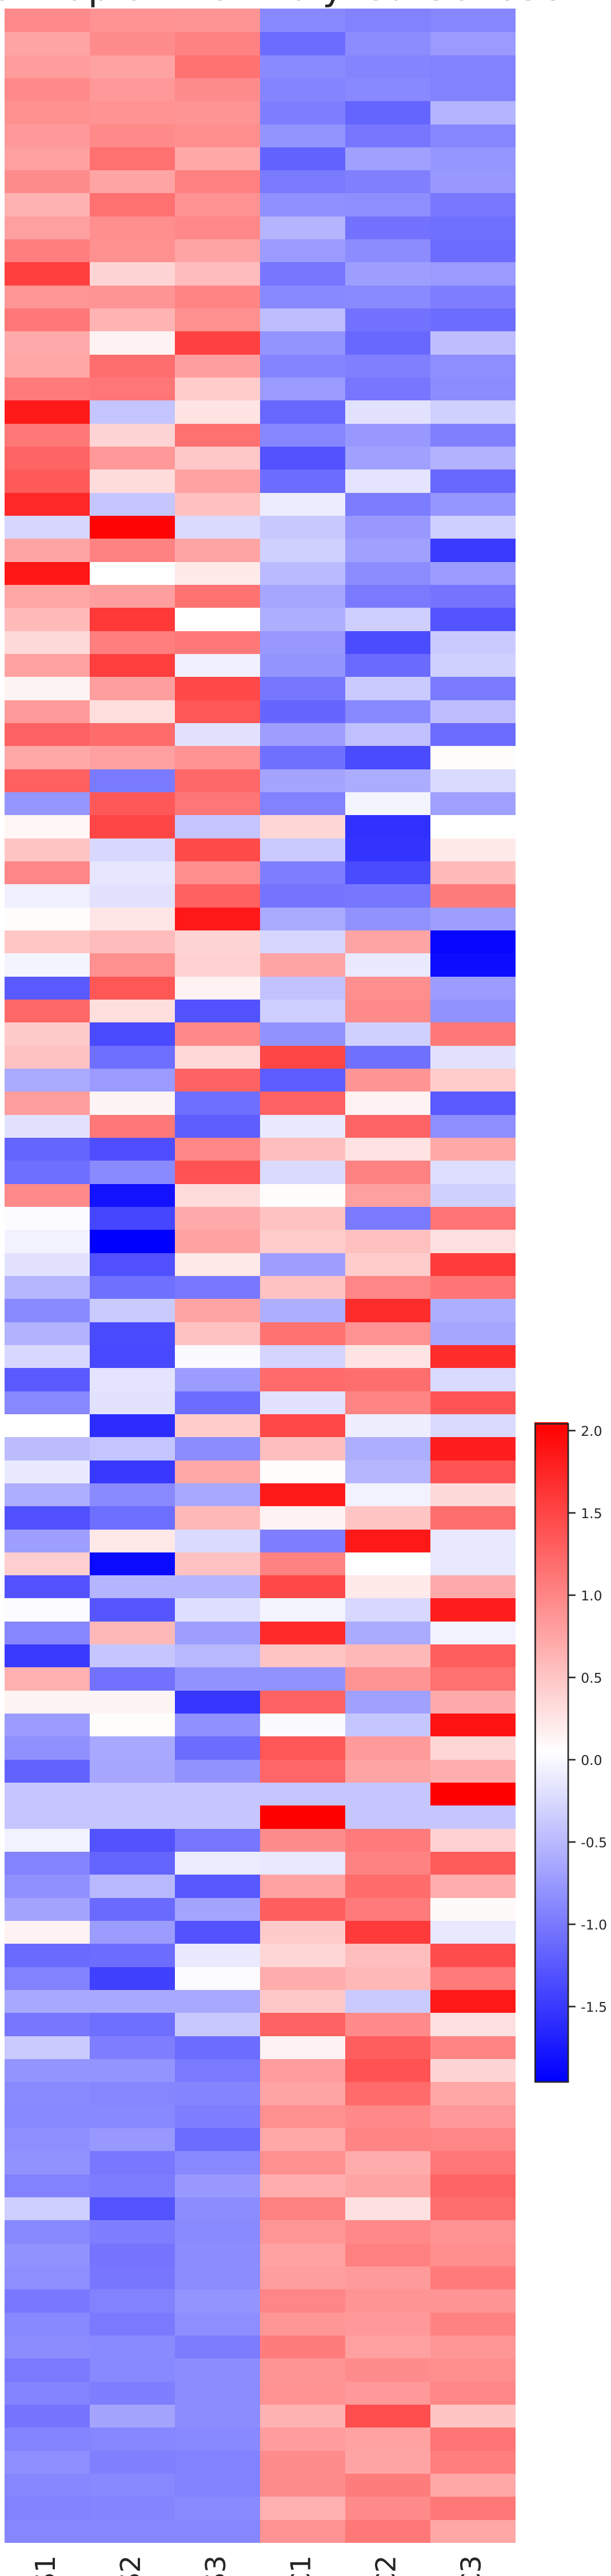

Supplement: Supplementary file 142 [file 308_TNF signaling pathway(rno04668).heatmap.pdf › Source data/1.RNA-Seq source data/1.BMSCs/result/1.6.GSEA/S-vs-C/kegg/308_TNF signaling pathway(rno04668).heatmap.pdf]

# Neutrophil extracellular trap formation(rno04613)

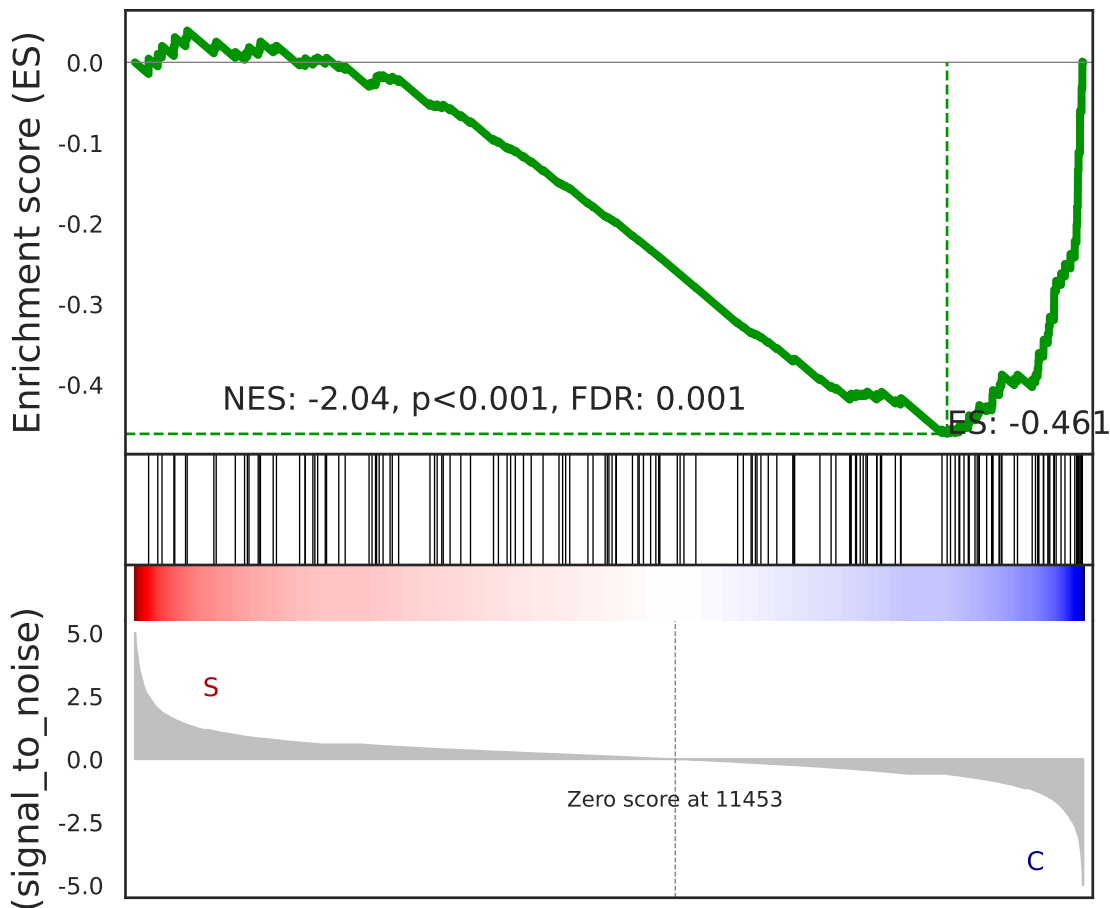

Supplement: Supplementary file 143 [file 309_Neutrophil extracellular trap formation(rno04613).gsea.pdf › Source data/1.RNA-Seq source data/1.BMSCs/result/1.6.GSEA/S-vs-C/kegg/309_Neutrophil extracellular trap formation(rno04613).gsea.pdf]

Neutrophil extracellular trap formation(rno04613)  
Heatmap of the Analyzed GeneSet

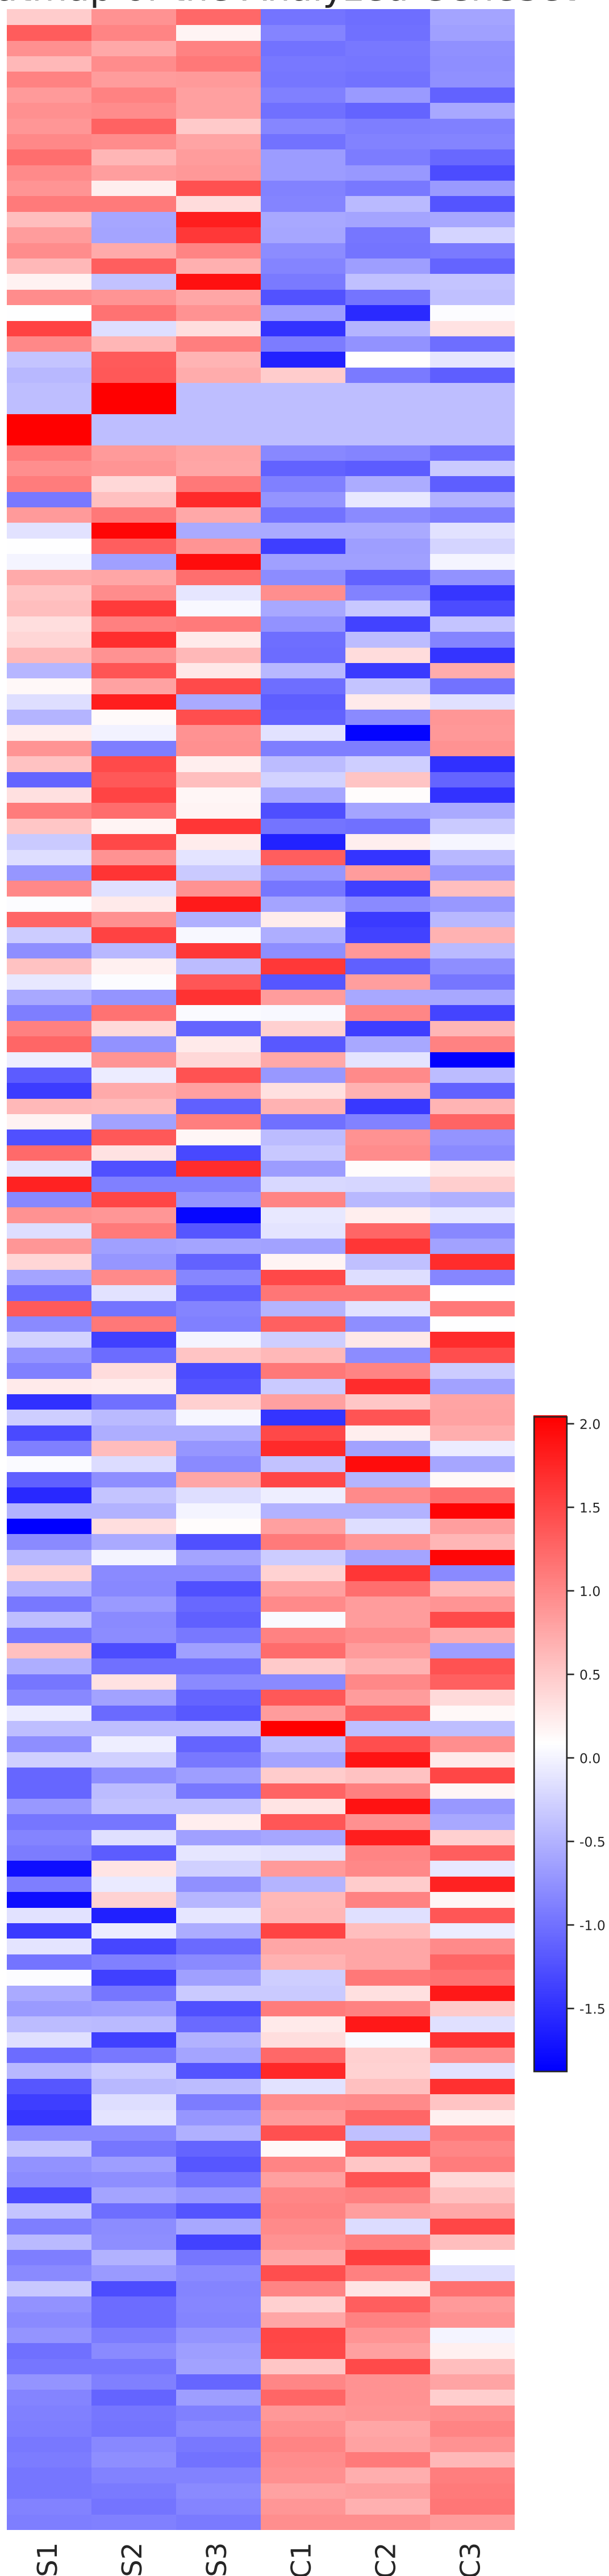

Supplement: Supplementary file 144 [file 309_Neutrophil extracellular trap formation(rno04613).heatmap.pdf › Source data/1.RNA-Seq source data/1.BMSCs/result/1.6.GSEA/S-vs-C/kegg/309_Neutrophil extracellular trap formation(rno04613).heatmap.pdf]

**Viral protein interaction with cytokine and cytokine rece...(rno04061)**

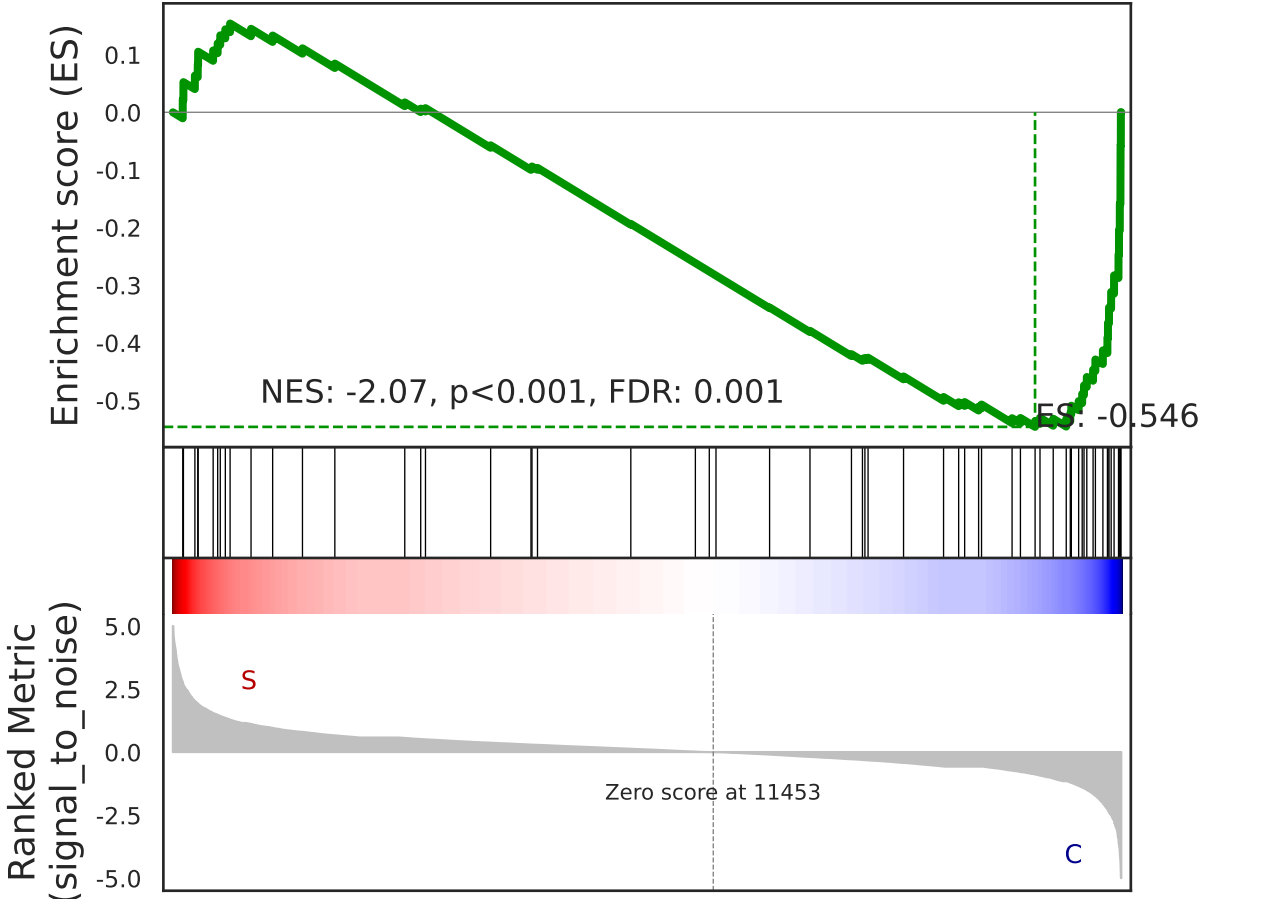

Supplement: Supplementary file 145 [file 310_Viral protein interaction with cytokine and cytokine rece...(rno04061).gsea.pdf › Source data/1.RNA-Seq source data/1.BMSCs/result/1.6.GSEA/S-vs-C/kegg/310_Viral protein interaction with cytokine and cytokine rece...(rno04061).gsea.pdf]

# African trypanosomiasis(rno05143)

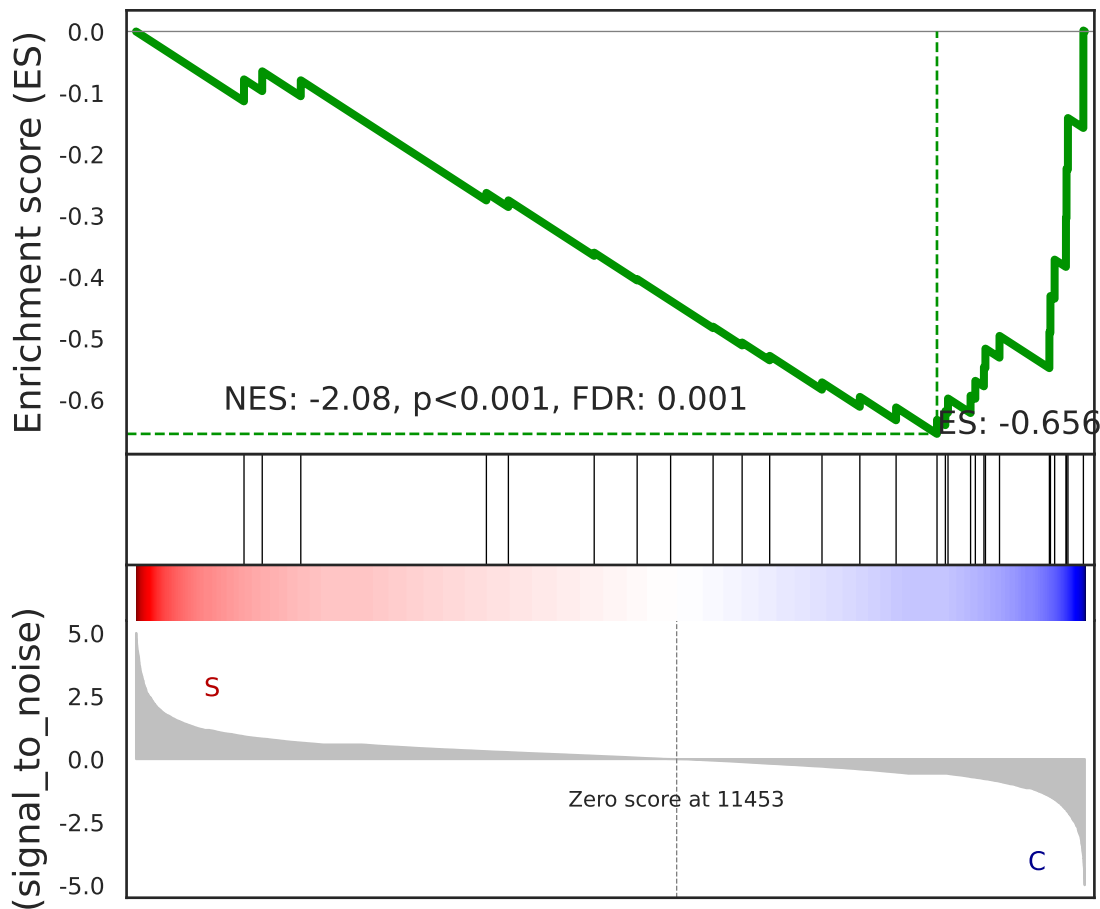

Supplement: Supplementary file 147 [file 311_African trypanosomiasis(rno05143).gsea.pdf › Source data/1.RNA-Seq source data/1.BMSCs/result/1.6.GSEA/S-vs-C/kegg/311_African trypanosomiasis(rno05143).gsea.pdf]

# African trypanosomiasis(rno05143)

## Heatmap of the Analyzed GeneSet

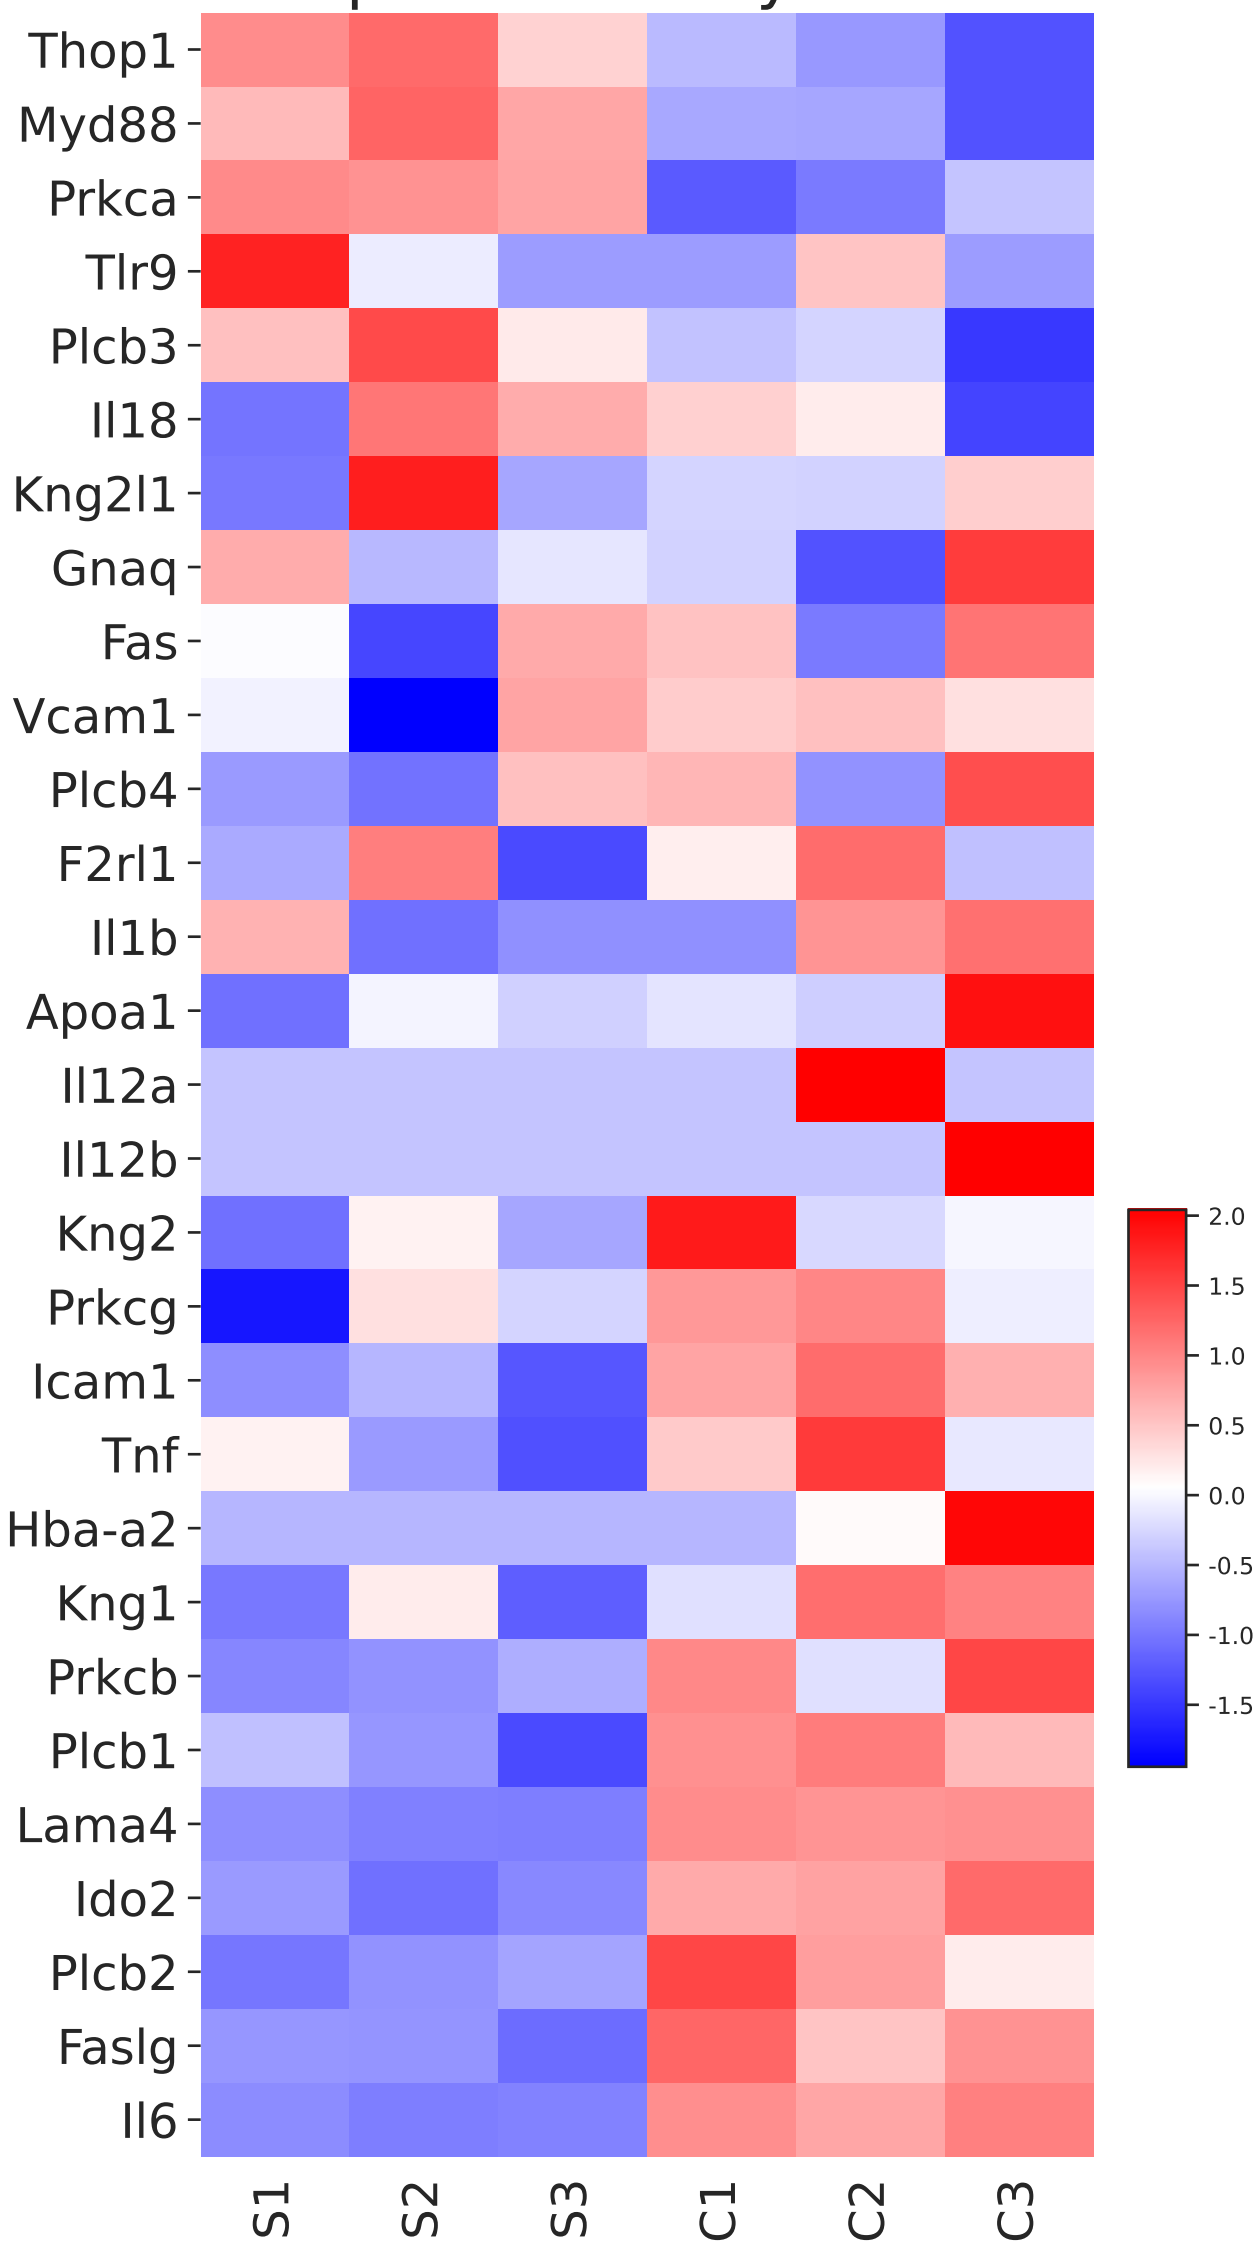

Supplement: Supplementary file 148 [file 311_African trypanosomiasis(rno05143).heatmap.pdf › Source data/1.RNA-Seq source data/1.BMSCs/result/1.6.GSEA/S-vs-C/kegg/311_African trypanosomiasis(rno05143).heatmap.pdf]

# Amoebiasis(rno05146)

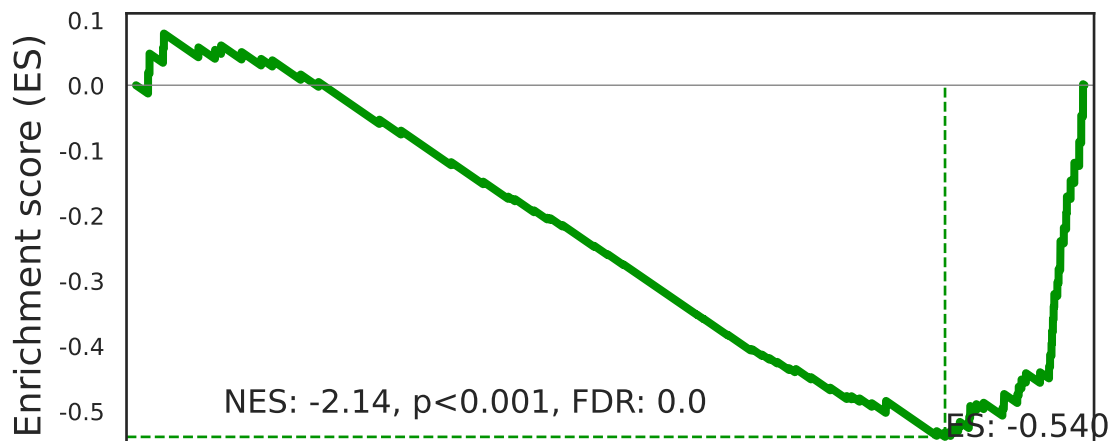

Ranked Metric  
(signal\_to\_noise)

5.0

2.5

0.0

-2.5

-5.0

S

Zero score at 11453

C

Supplement: Supplementary file 149 [file 312_Amoebiasis(rno05146).gsea.pdf › Source data/1.RNA-Seq source data/1.BMSCs/result/1.6.GSEA/S-vs-C/kegg/312_Amoebiasis(rno05146).gsea.pdf]

# Amoebiasis(rno05146)

## Heatmap of the Analyzed GeneSet

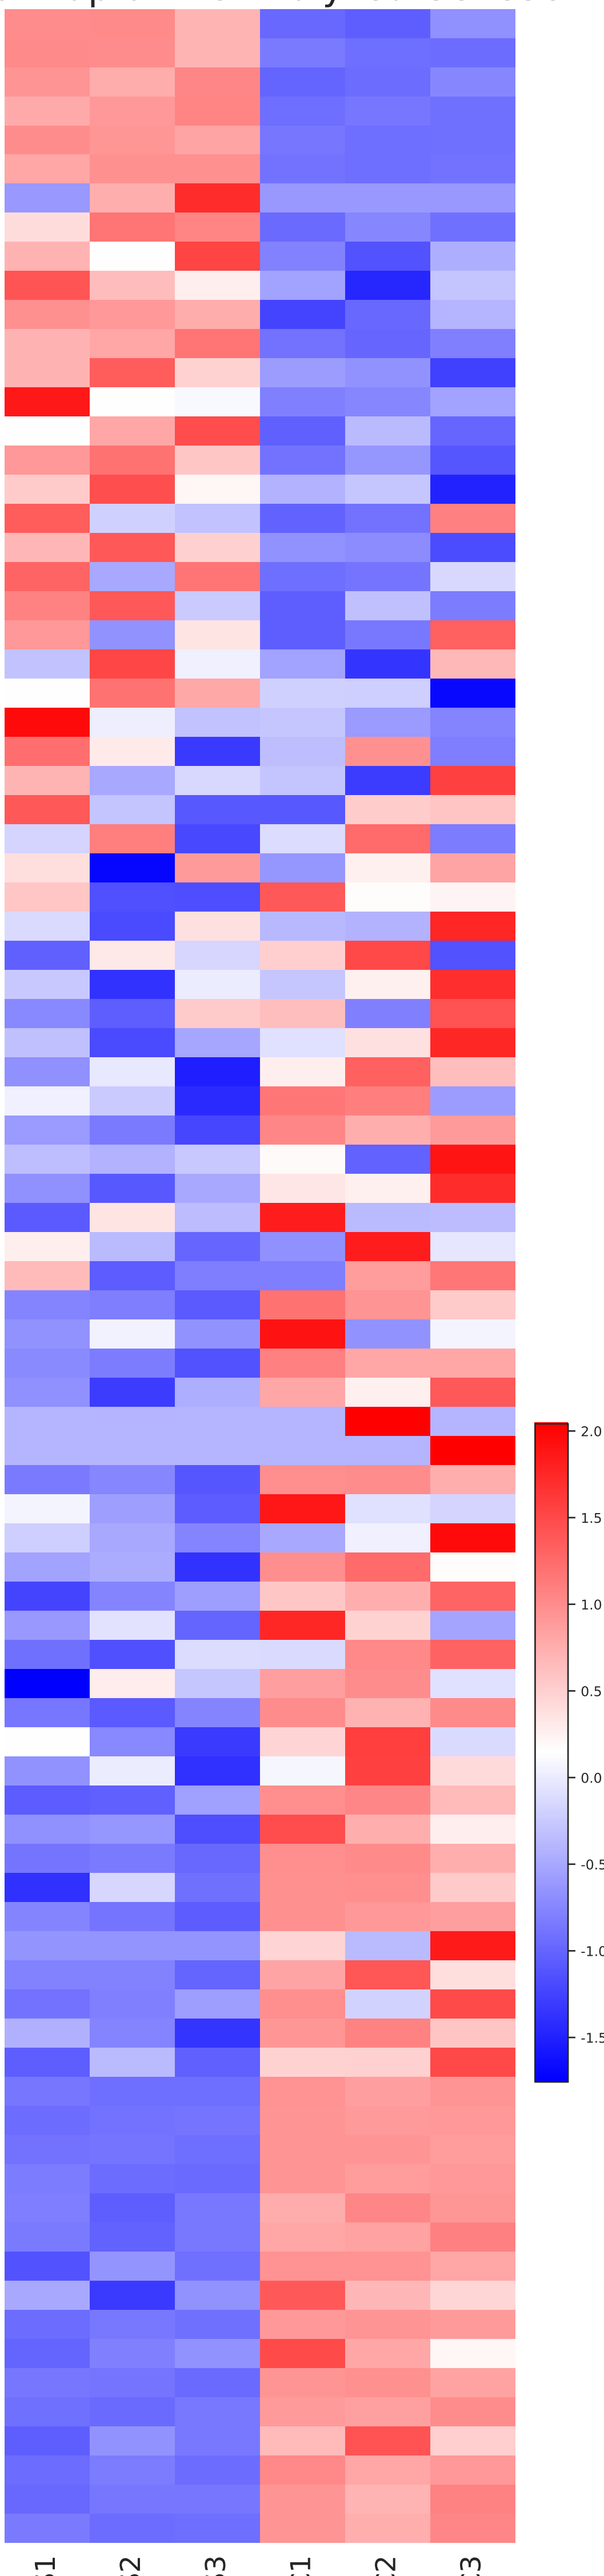

Supplement: Supplementary file 150 [file 312_Amoebiasis(rno05146).heatmap.pdf › Source data/1.RNA-Seq source data/1.BMSCs/result/1.6.GSEA/S-vs-C/kegg/312_Amoebiasis(rno05146).heatmap.pdf]

# IL-17 signaling pathway(rno04657)

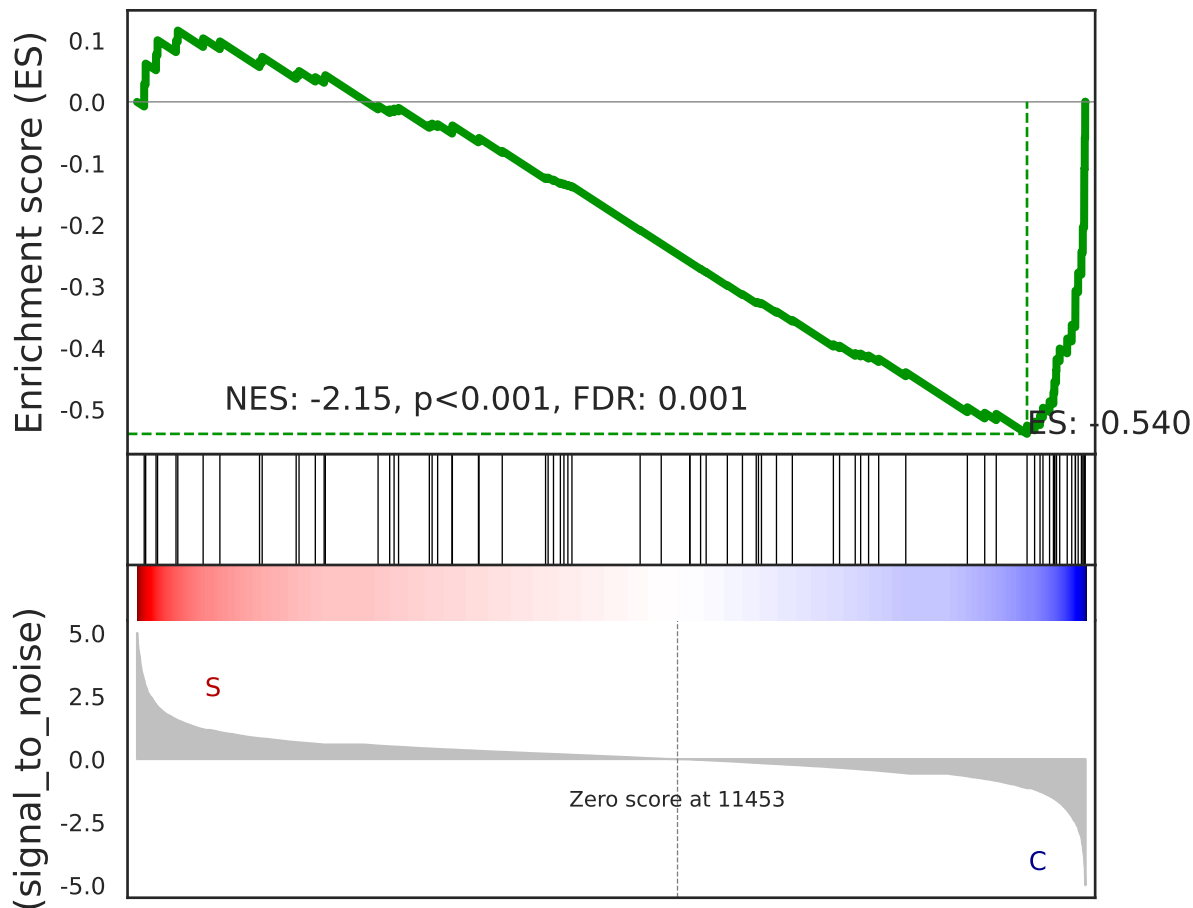

Supplement: Supplementary file 151 [file 313_IL-17 signaling pathway(rno04657).gsea.pdf › Source data/1.RNA-Seq source data/1.BMSCs/result/1.6.GSEA/S-vs-C/kegg/313_IL-17 signaling pathway(rno04657).gsea.pdf]

IL-17 signaling pathway(rno04657)  
Heatmap of the Analyzed GeneSet

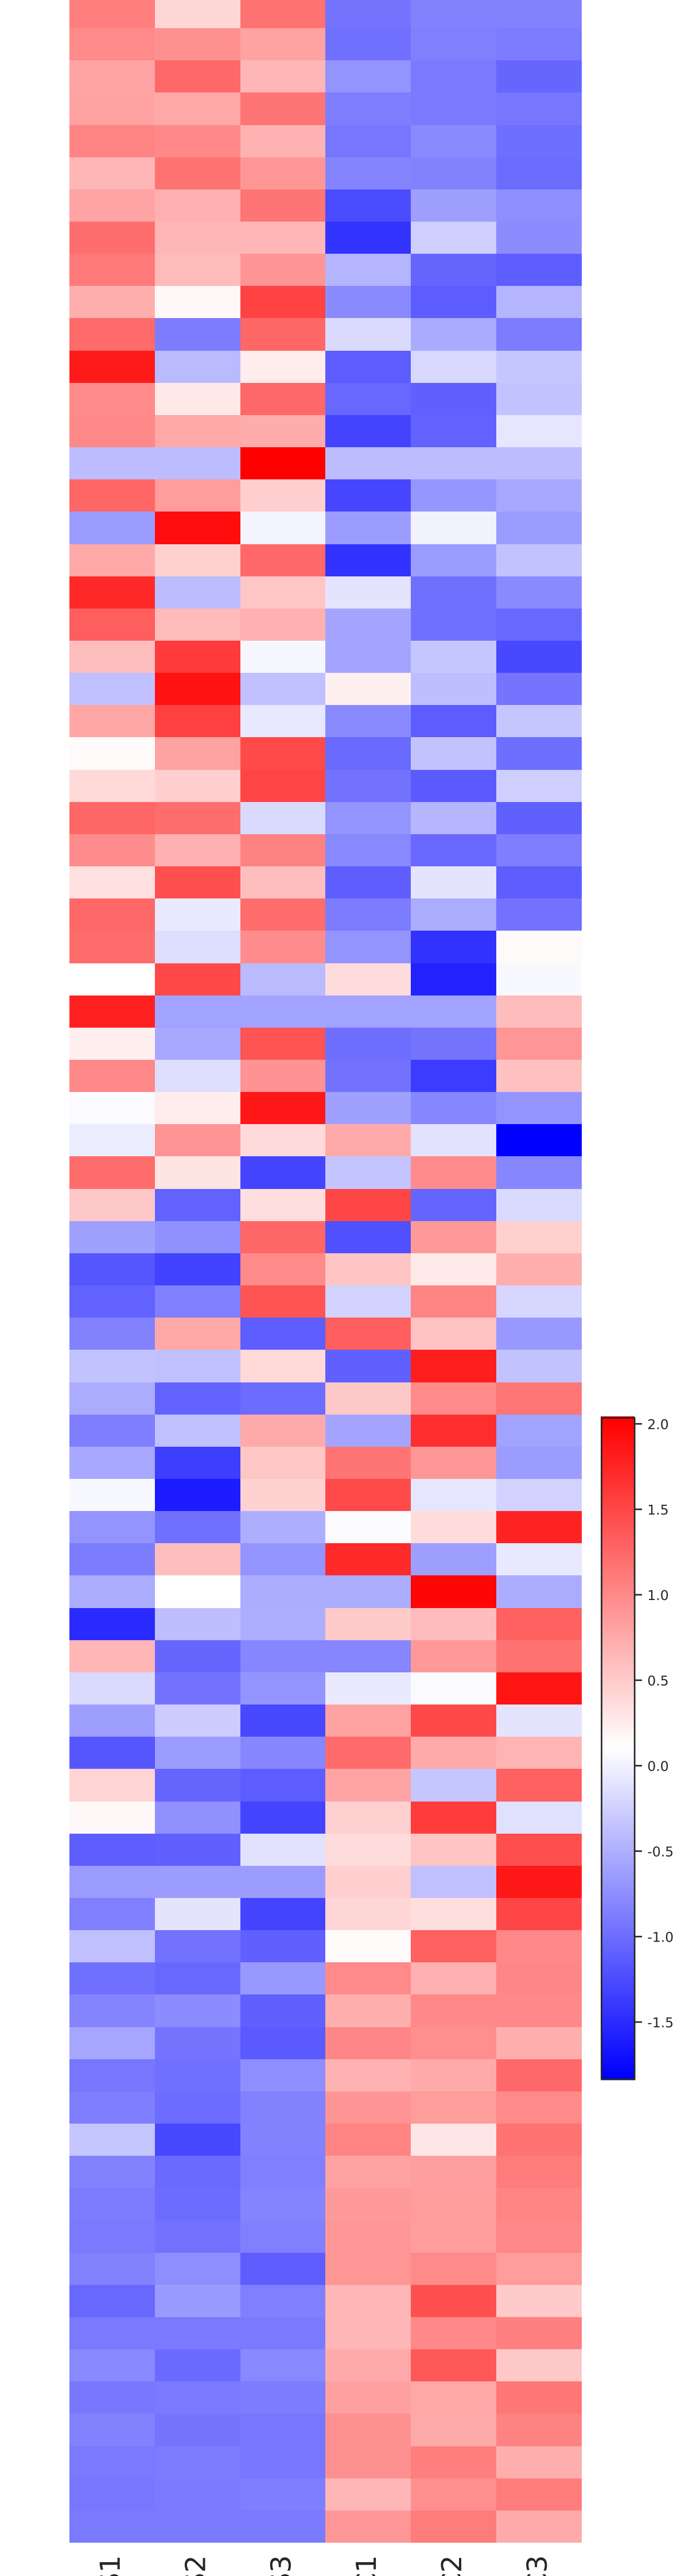

Supplement: Supplementary file 152 [file 313_IL-17 signaling pathway(rno04657).heatmap.pdf › Source data/1.RNA-Seq source data/1.BMSCs/result/1.6.GSEA/S-vs-C/kegg/313_IL-17 signaling pathway(rno04657).heatmap.pdf]

# Relaxin signaling pathway(rno04926)

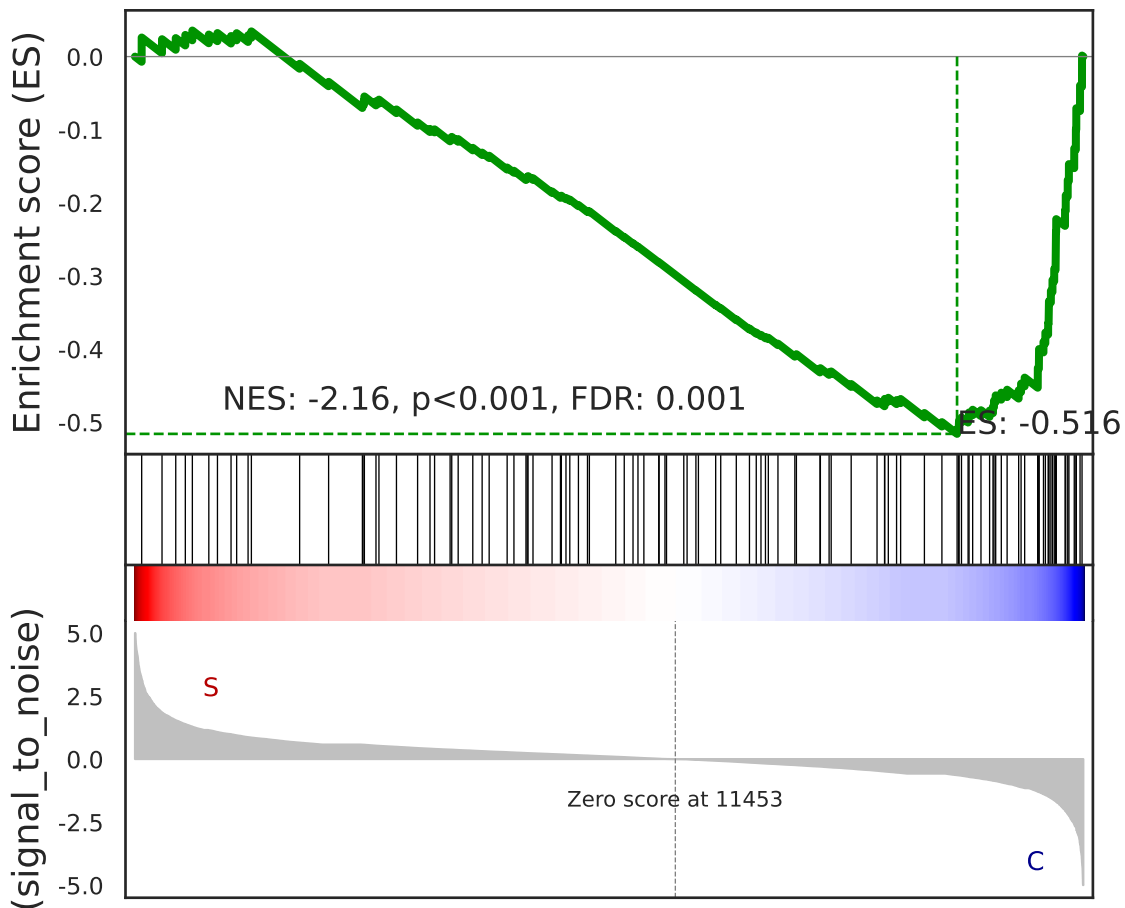

Supplement: Supplementary file 153 [file 314_Relaxin signaling pathway(rno04926).gsea.pdf › Source data/1.RNA-Seq source data/1.BMSCs/result/1.6.GSEA/S-vs-C/kegg/314_Relaxin signaling pathway(rno04926).gsea.pdf]

Relaxin signaling pathway(rno04926)  
Heatmap of the Analyzed GeneSet

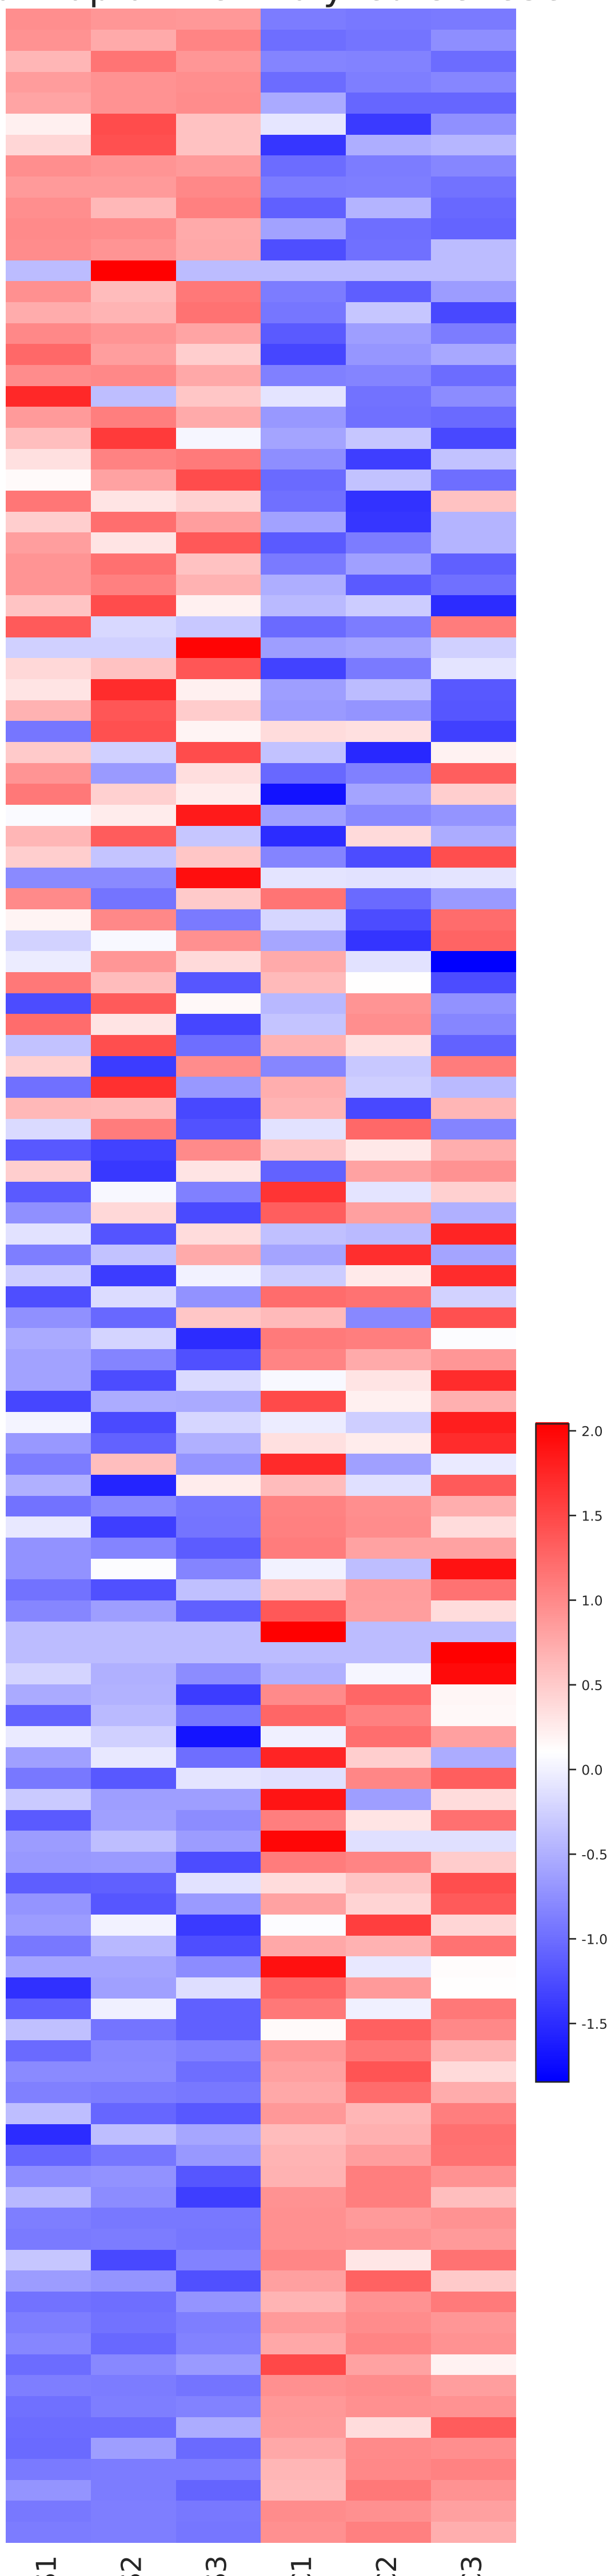

Supplement: Supplementary file 154 [file 314_Relaxin signaling pathway(rno04926).heatmap.pdf › Source data/1.RNA-Seq source data/1.BMSCs/result/1.6.GSEA/S-vs-C/kegg/314_Relaxin signaling pathway(rno04926).heatmap.pdf]

# Rheumatoid arthritis(rno05323)

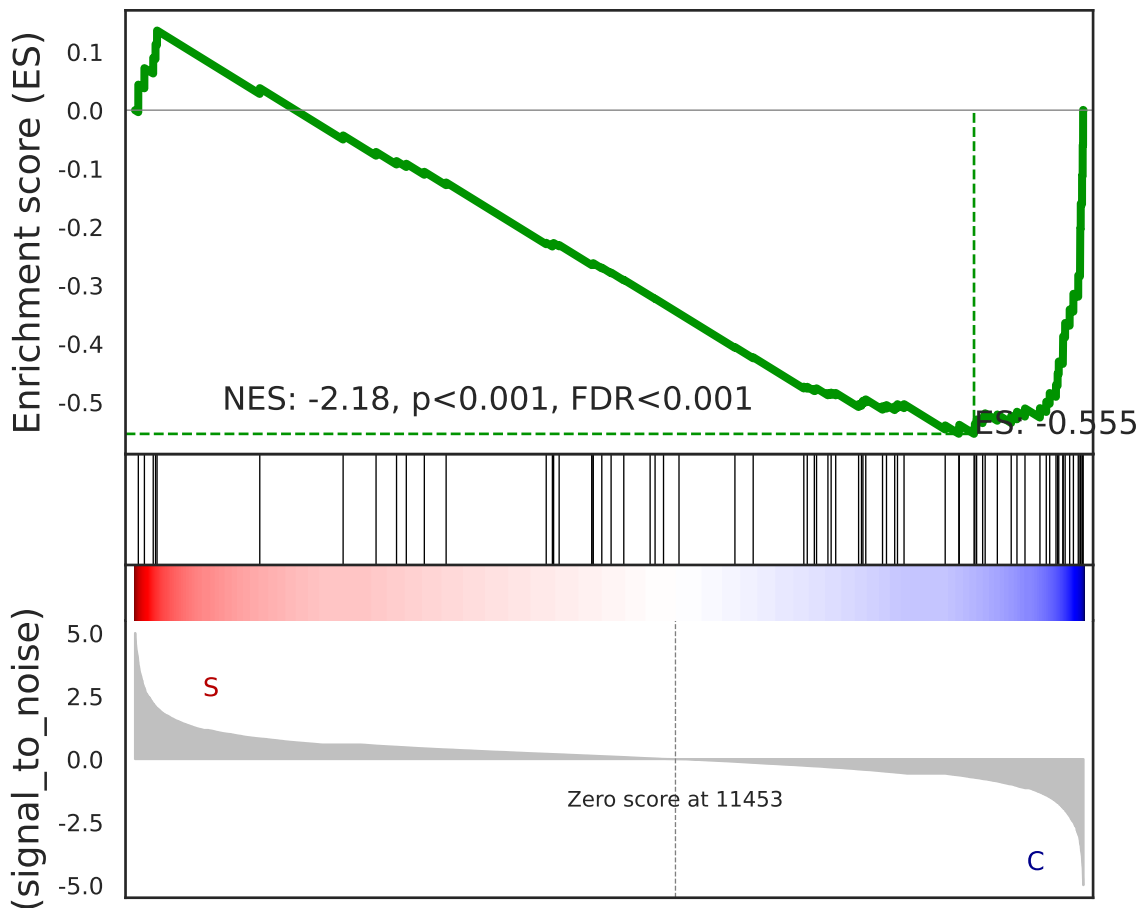

Supplement: Supplementary file 155 [file 315_Rheumatoid arthritis(rno05323).gsea.pdf › Source data/1.RNA-Seq source data/1.BMSCs/result/1.6.GSEA/S-vs-C/kegg/315_Rheumatoid arthritis(rno05323).gsea.pdf]

Rheumatoid arthritis(rno05323)  
Heatmap of the Analyzed GeneSet

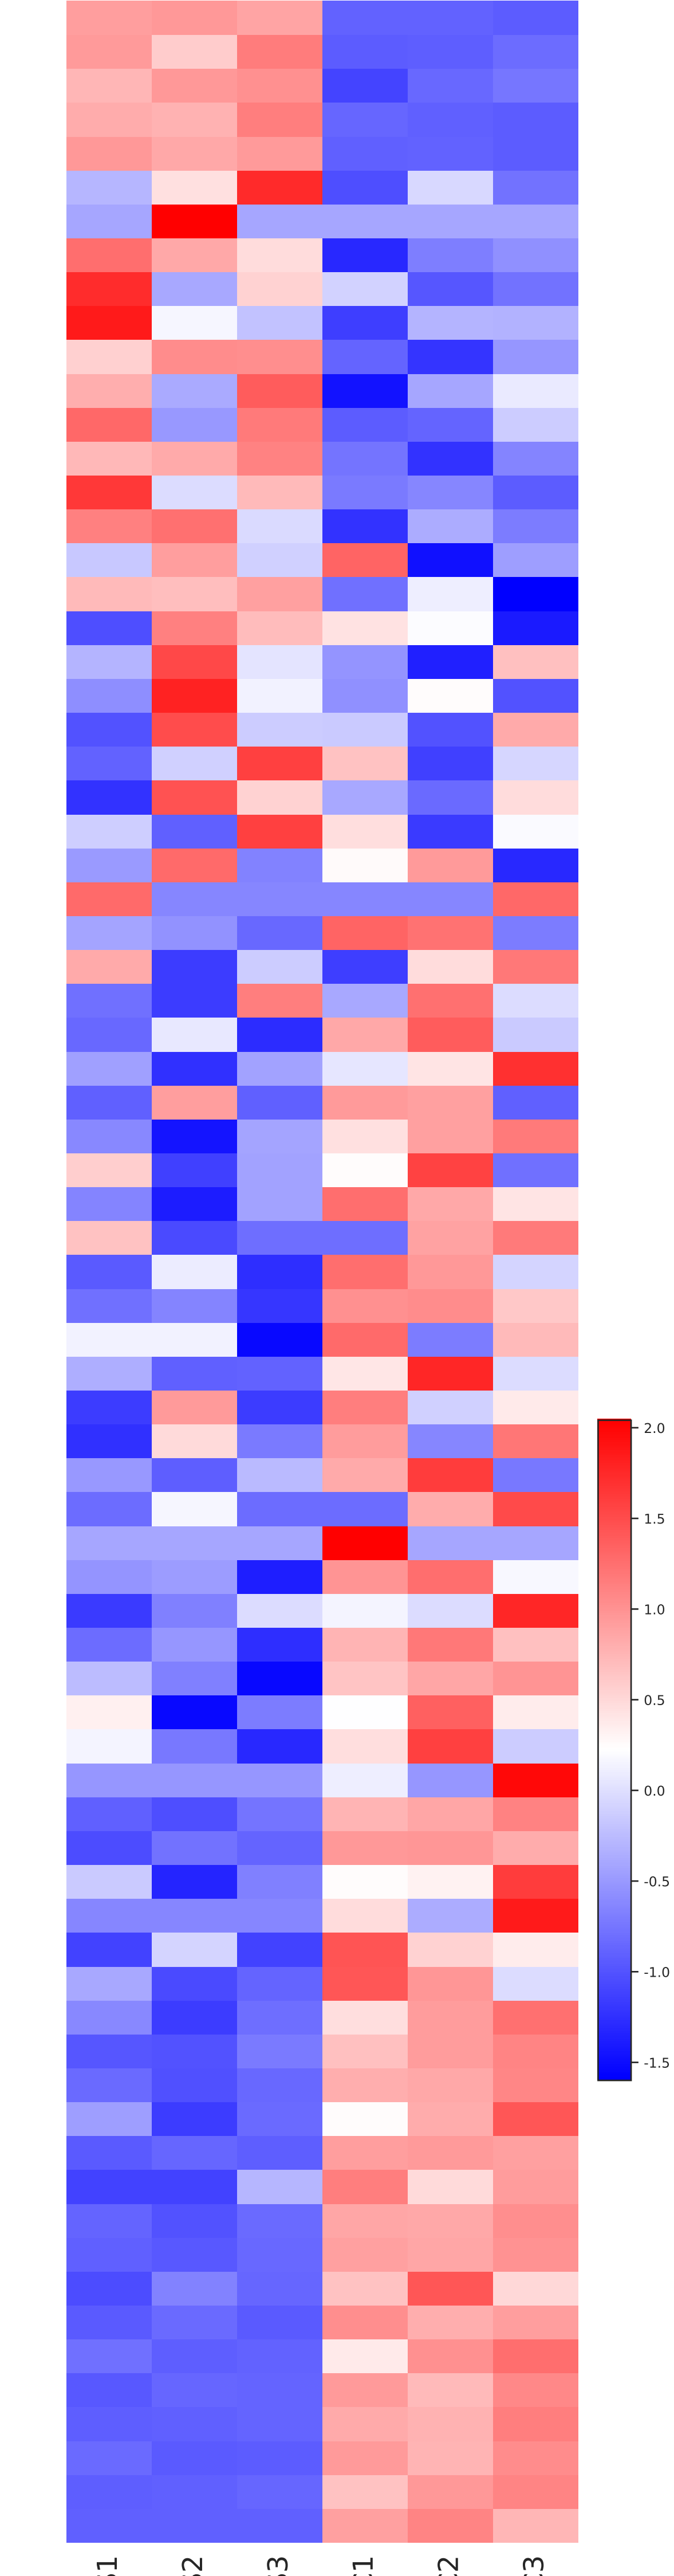

Supplement: Supplementary file 156 [file 315_Rheumatoid arthritis(rno05323).heatmap.pdf › Source data/1.RNA-Seq source data/1.BMSCs/result/1.6.GSEA/S-vs-C/kegg/315_Rheumatoid arthritis(rno05323).heatmap.pdf]

# Chemokine signaling pathway(rno04062)

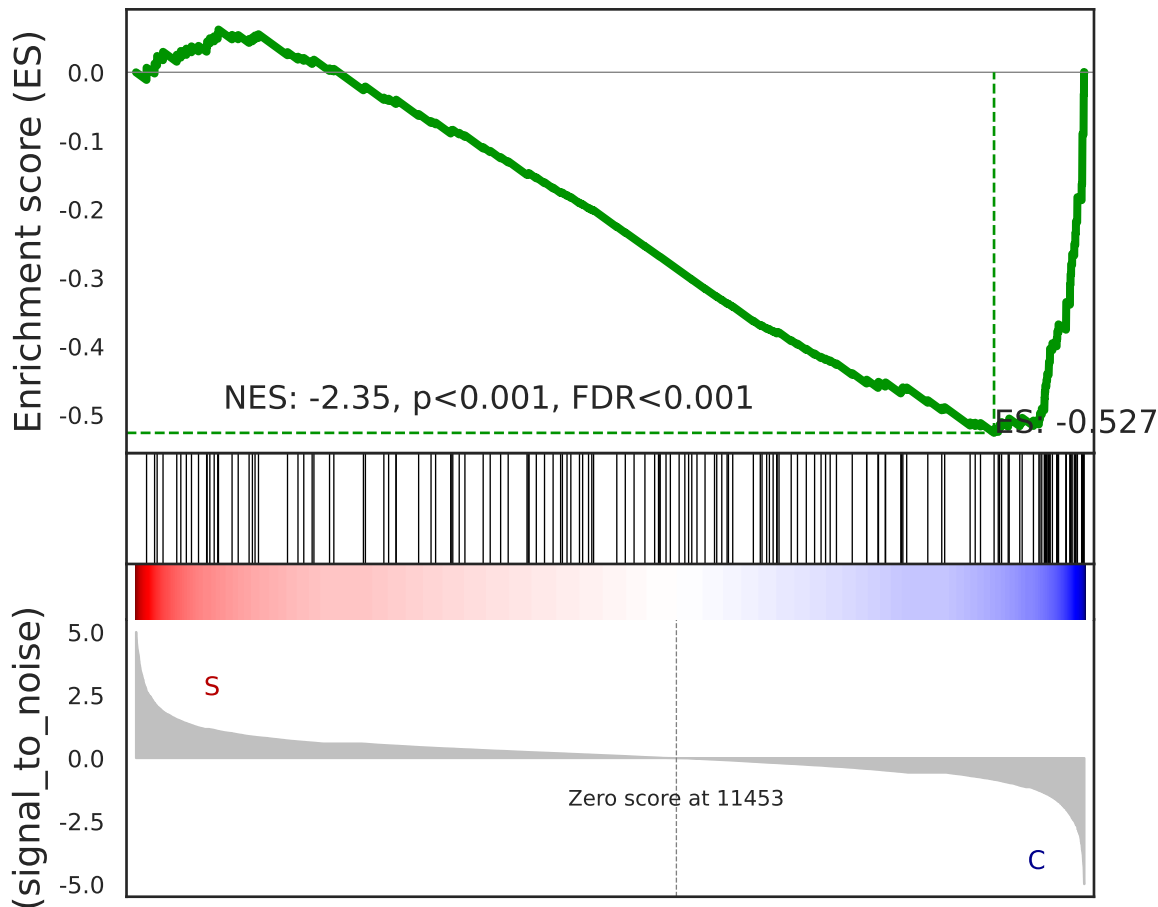

Supplement: Supplementary file 157 [file 316_Chemokine signaling pathway(rno04062).gsea.pdf › Source data/1.RNA-Seq source data/1.BMSCs/result/1.6.GSEA/S-vs-C/kegg/316_Chemokine signaling pathway(rno04062).gsea.pdf]

Chemokine signaling pathway(rno04062)  
Heatmap of the Analyzed GeneSet

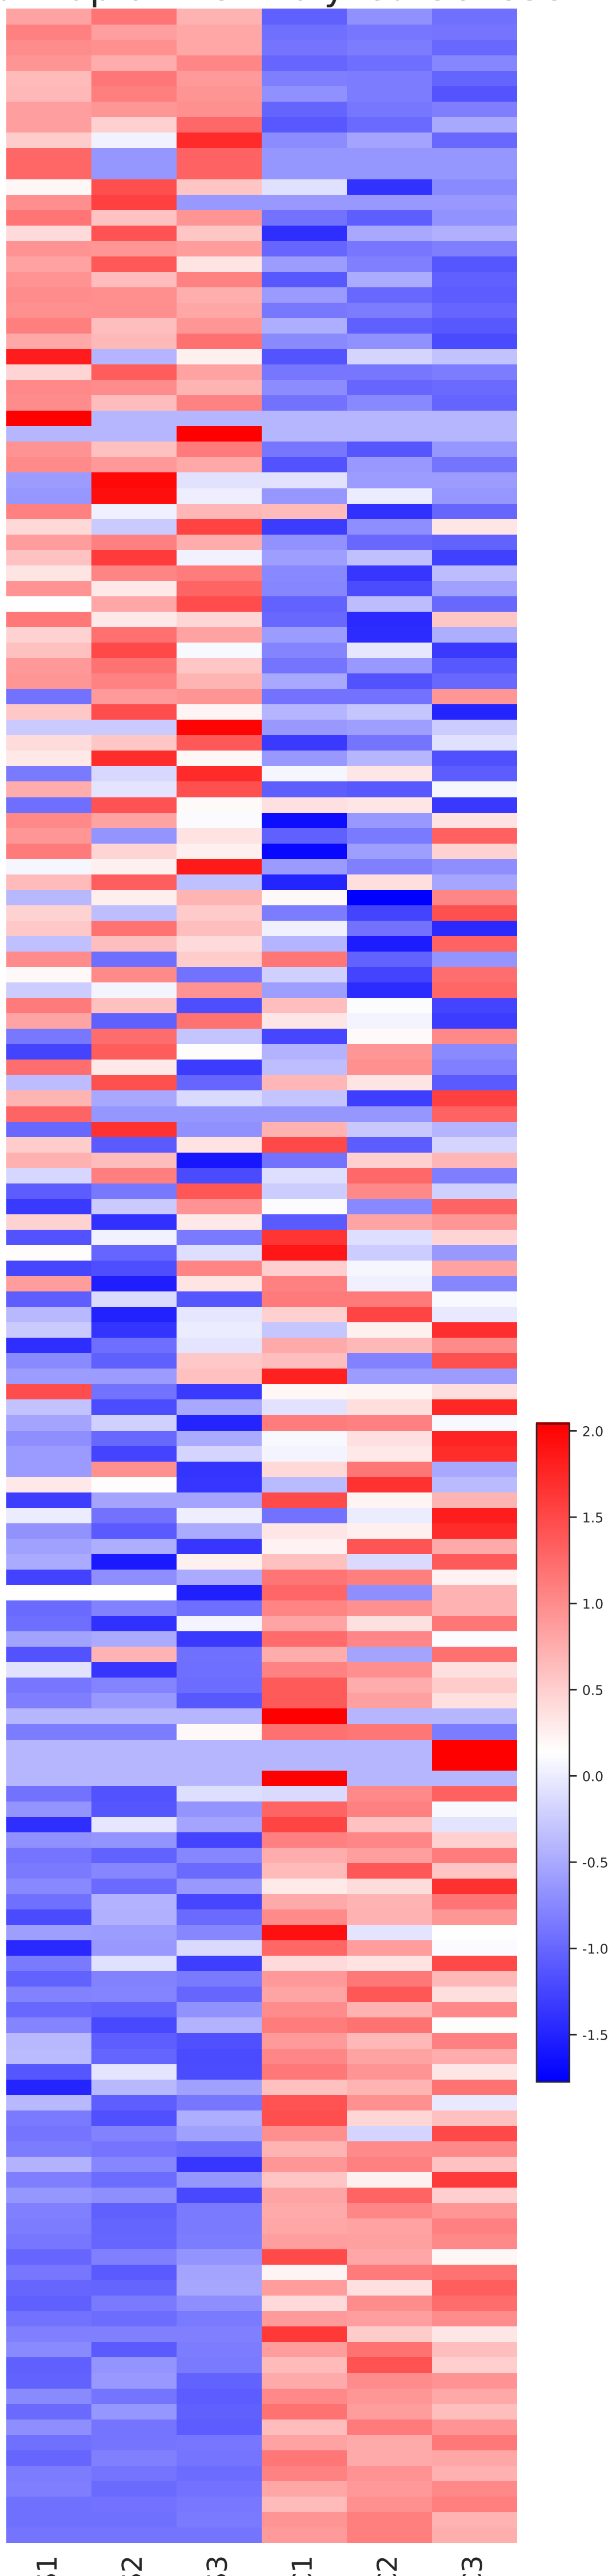

Supplement: Supplementary file 158 [file 316_Chemokine signaling pathway(rno04062).heatmap.pdf › Source data/1.RNA-Seq source data/1.BMSCs/result/1.6.GSEA/S-vs-C/kegg/316_Chemokine signaling pathway(rno04062).heatmap.pdf]

# Drug metabolism - other enzymes(rno00983)

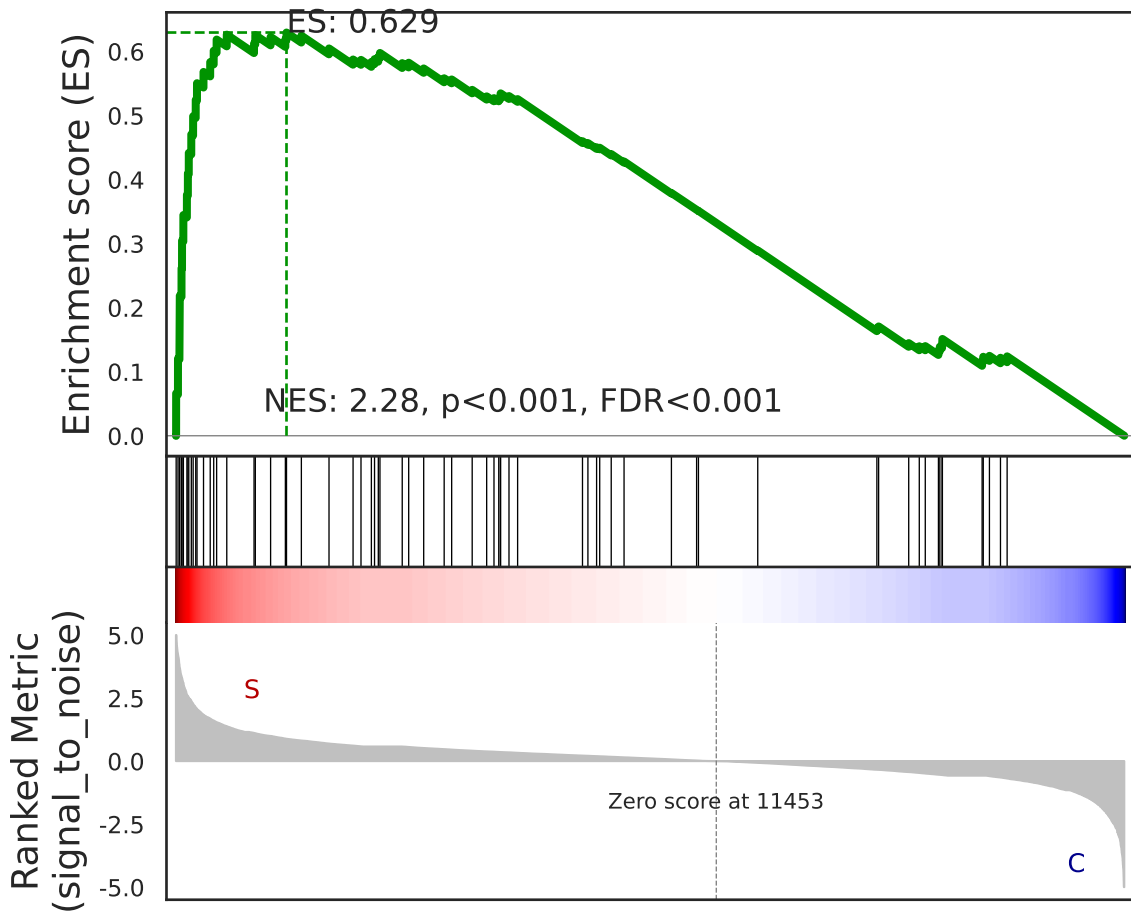

Supplement: Supplementary file 159 [file 3_Drug metabolism - other enzymes(rno00983).gsea.pdf › Source data/1.RNA-Seq source data/1.BMSCs/result/1.6.GSEA/S-vs-C/kegg/3_Drug metabolism - other enzymes(rno00983).gsea.pdf]

Drug metabolism - other enzymes(rno00983)  
Heatmap of the Analyzed GeneSet

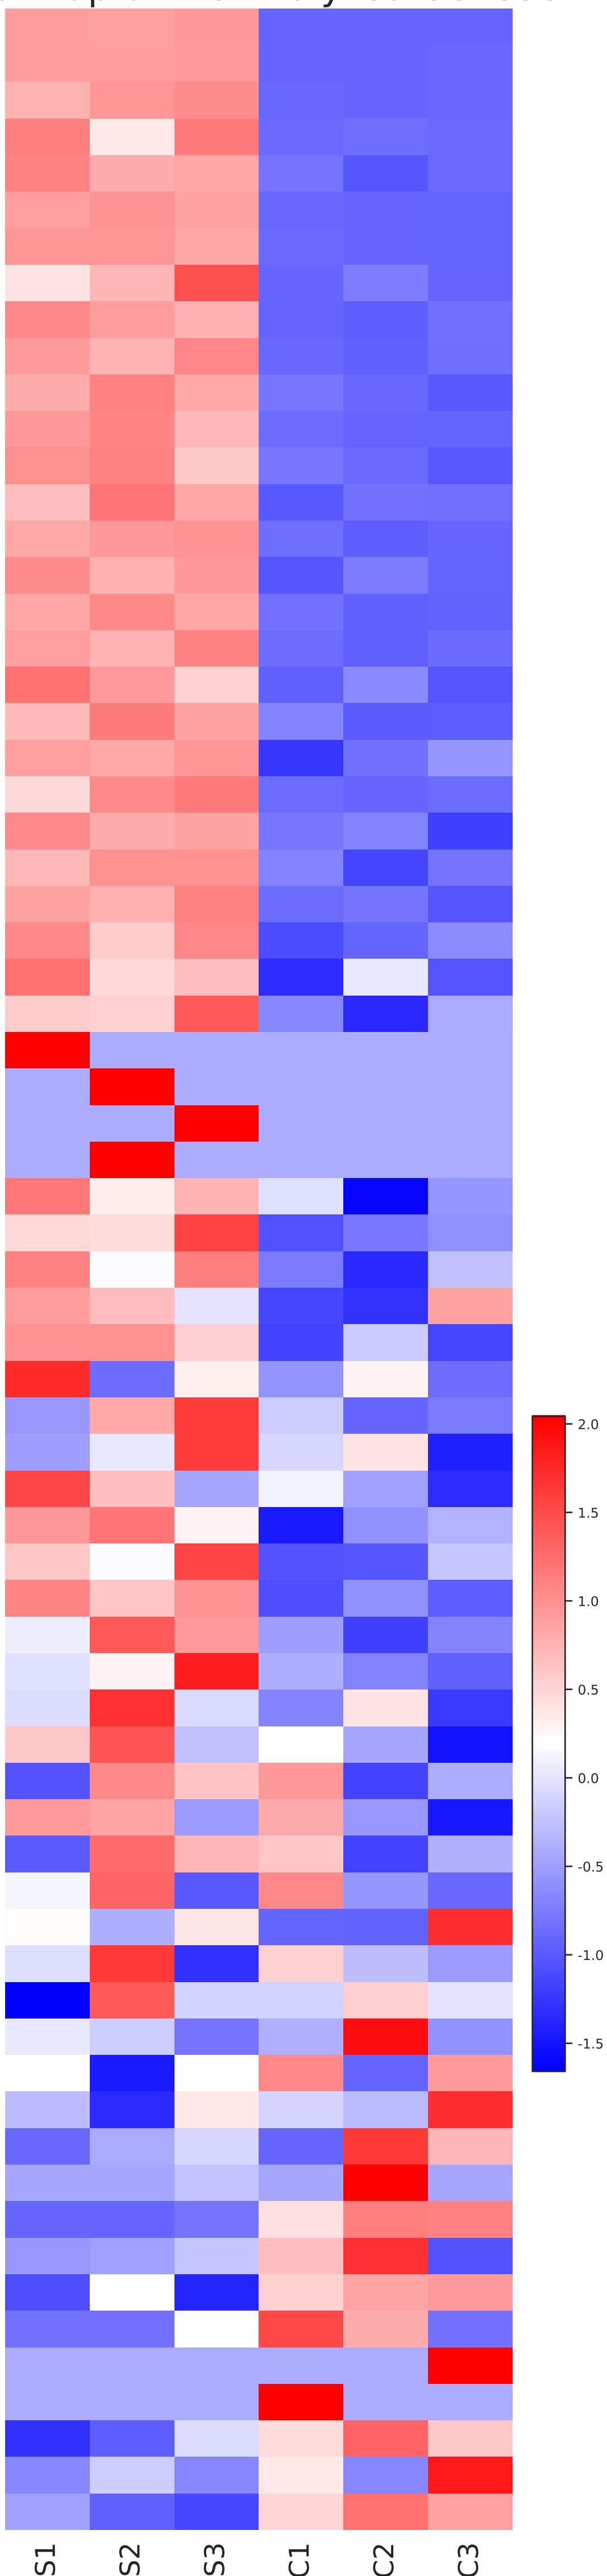

Supplement: Supplementary file 160 [file 3_Drug metabolism - other enzymes(rno00983).heatmap.pdf › Source data/1.RNA-Seq source data/1.BMSCs/result/1.6.GSEA/S-vs-C/kegg/3_Drug metabolism - other enzymes(rno00983).heatmap.pdf]

# Glutathione metabolism(rno00480)

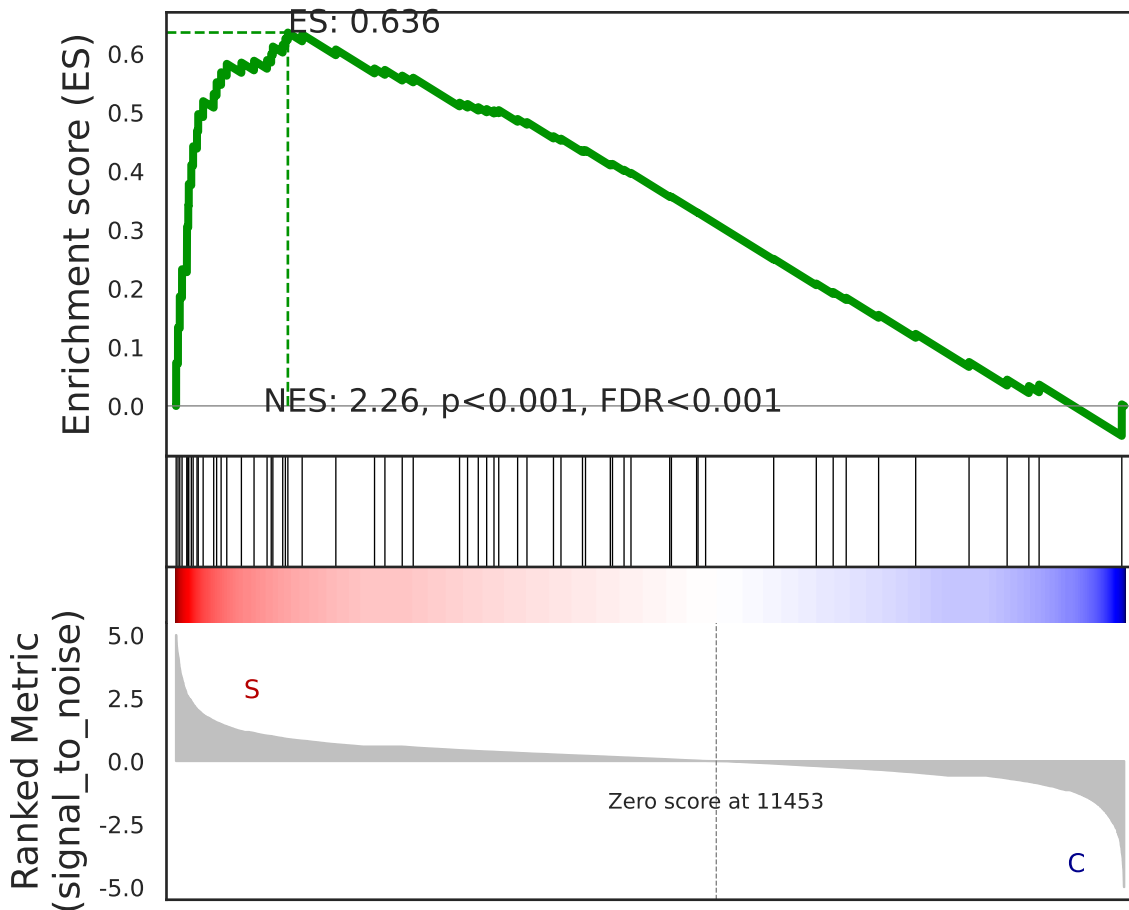

Supplement: Supplementary file 161 [file 4_Glutathione metabolism(rno00480).gsea.pdf › Source data/1.RNA-Seq source data/1.BMSCs/result/1.6.GSEA/S-vs-C/kegg/4_Glutathione metabolism(rno00480).gsea.pdf]

Glutathione metabolism(rno00480)  
Heatmap of the Analyzed GeneSet

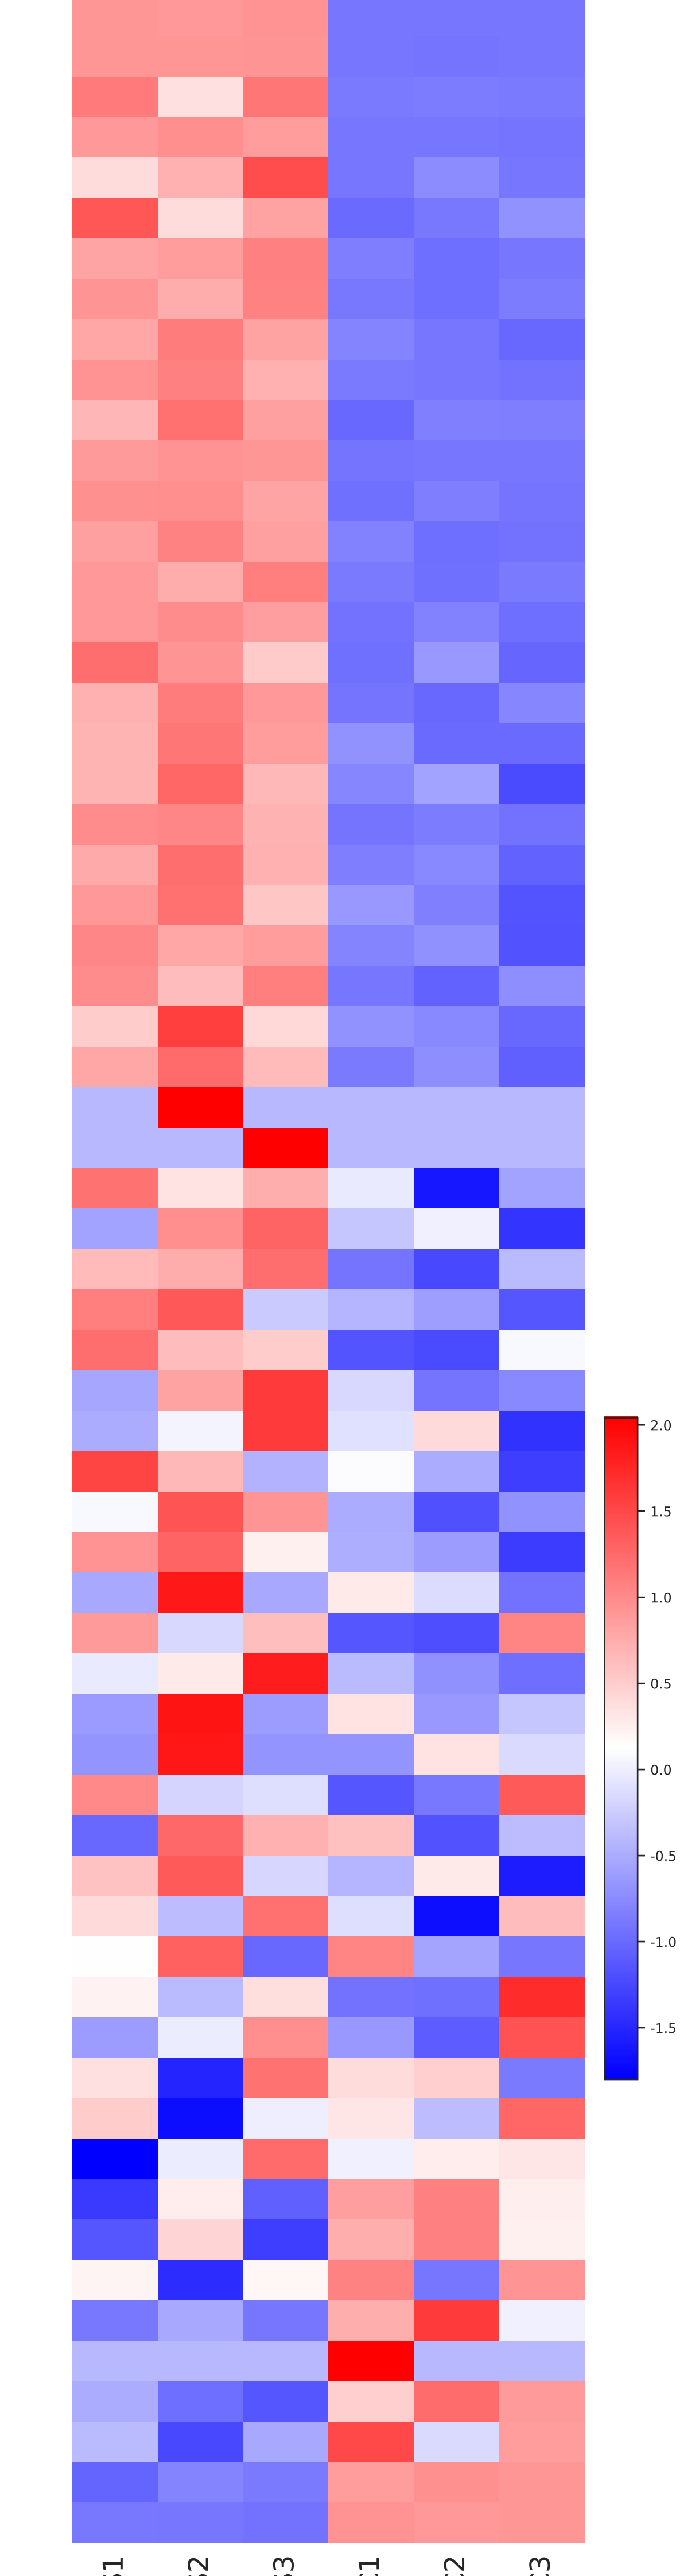

Supplement: Supplementary file 162 [file 4_Glutathione metabolism(rno00480).heatmap.pdf › Source data/1.RNA-Seq source data/1.BMSCs/result/1.6.GSEA/S-vs-C/kegg/4_Glutathione metabolism(rno00480).heatmap.pdf]

# Chemical carcinogenesis - DNA adducts(rno05204)

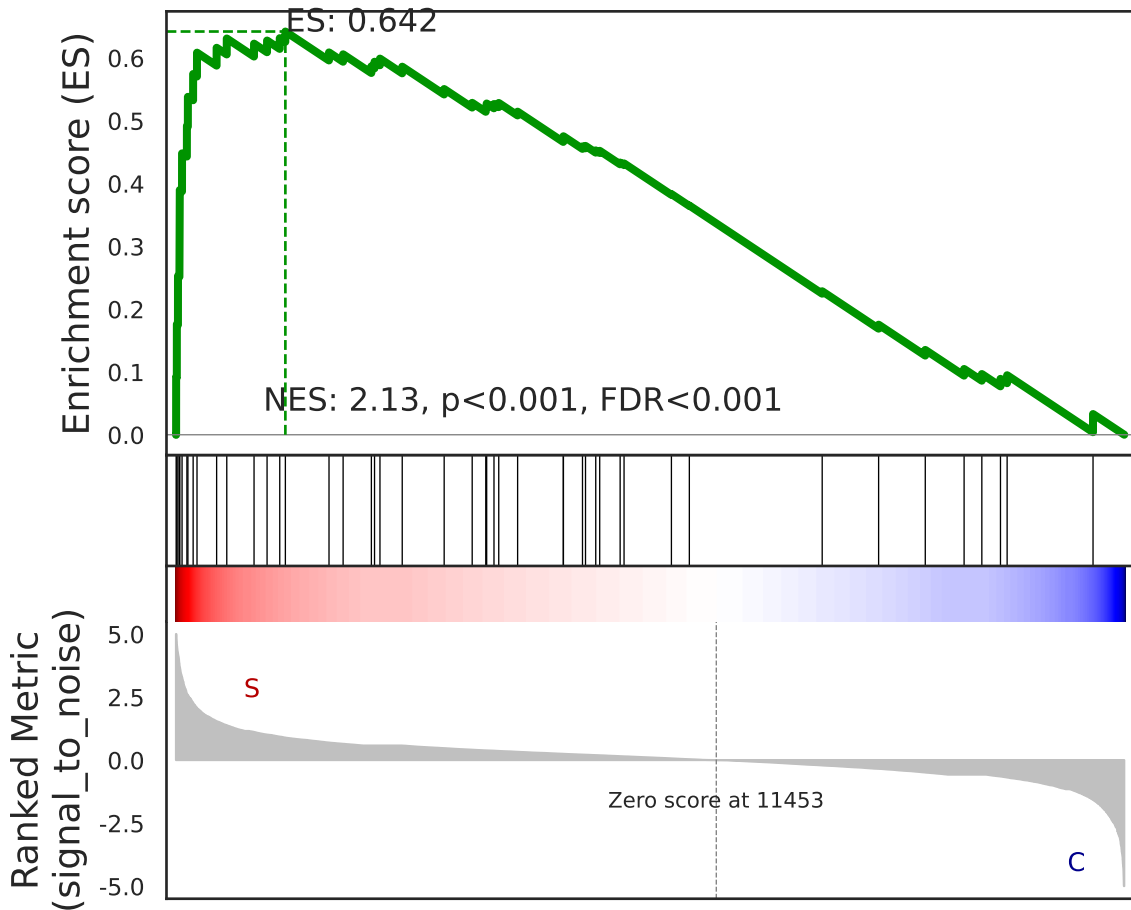

Supplement: Supplementary file 163 [file 5_Chemical carcinogenesis - DNA adducts(rno05204).gsea.pdf › Source data/1.RNA-Seq source data/1.BMSCs/result/1.6.GSEA/S-vs-C/kegg/5_Chemical carcinogenesis - DNA adducts(rno05204).gsea.pdf]

Chemical carcinogenesis - DNA adducts(rno05204)  
Heatmap of the Analyzed GeneSet

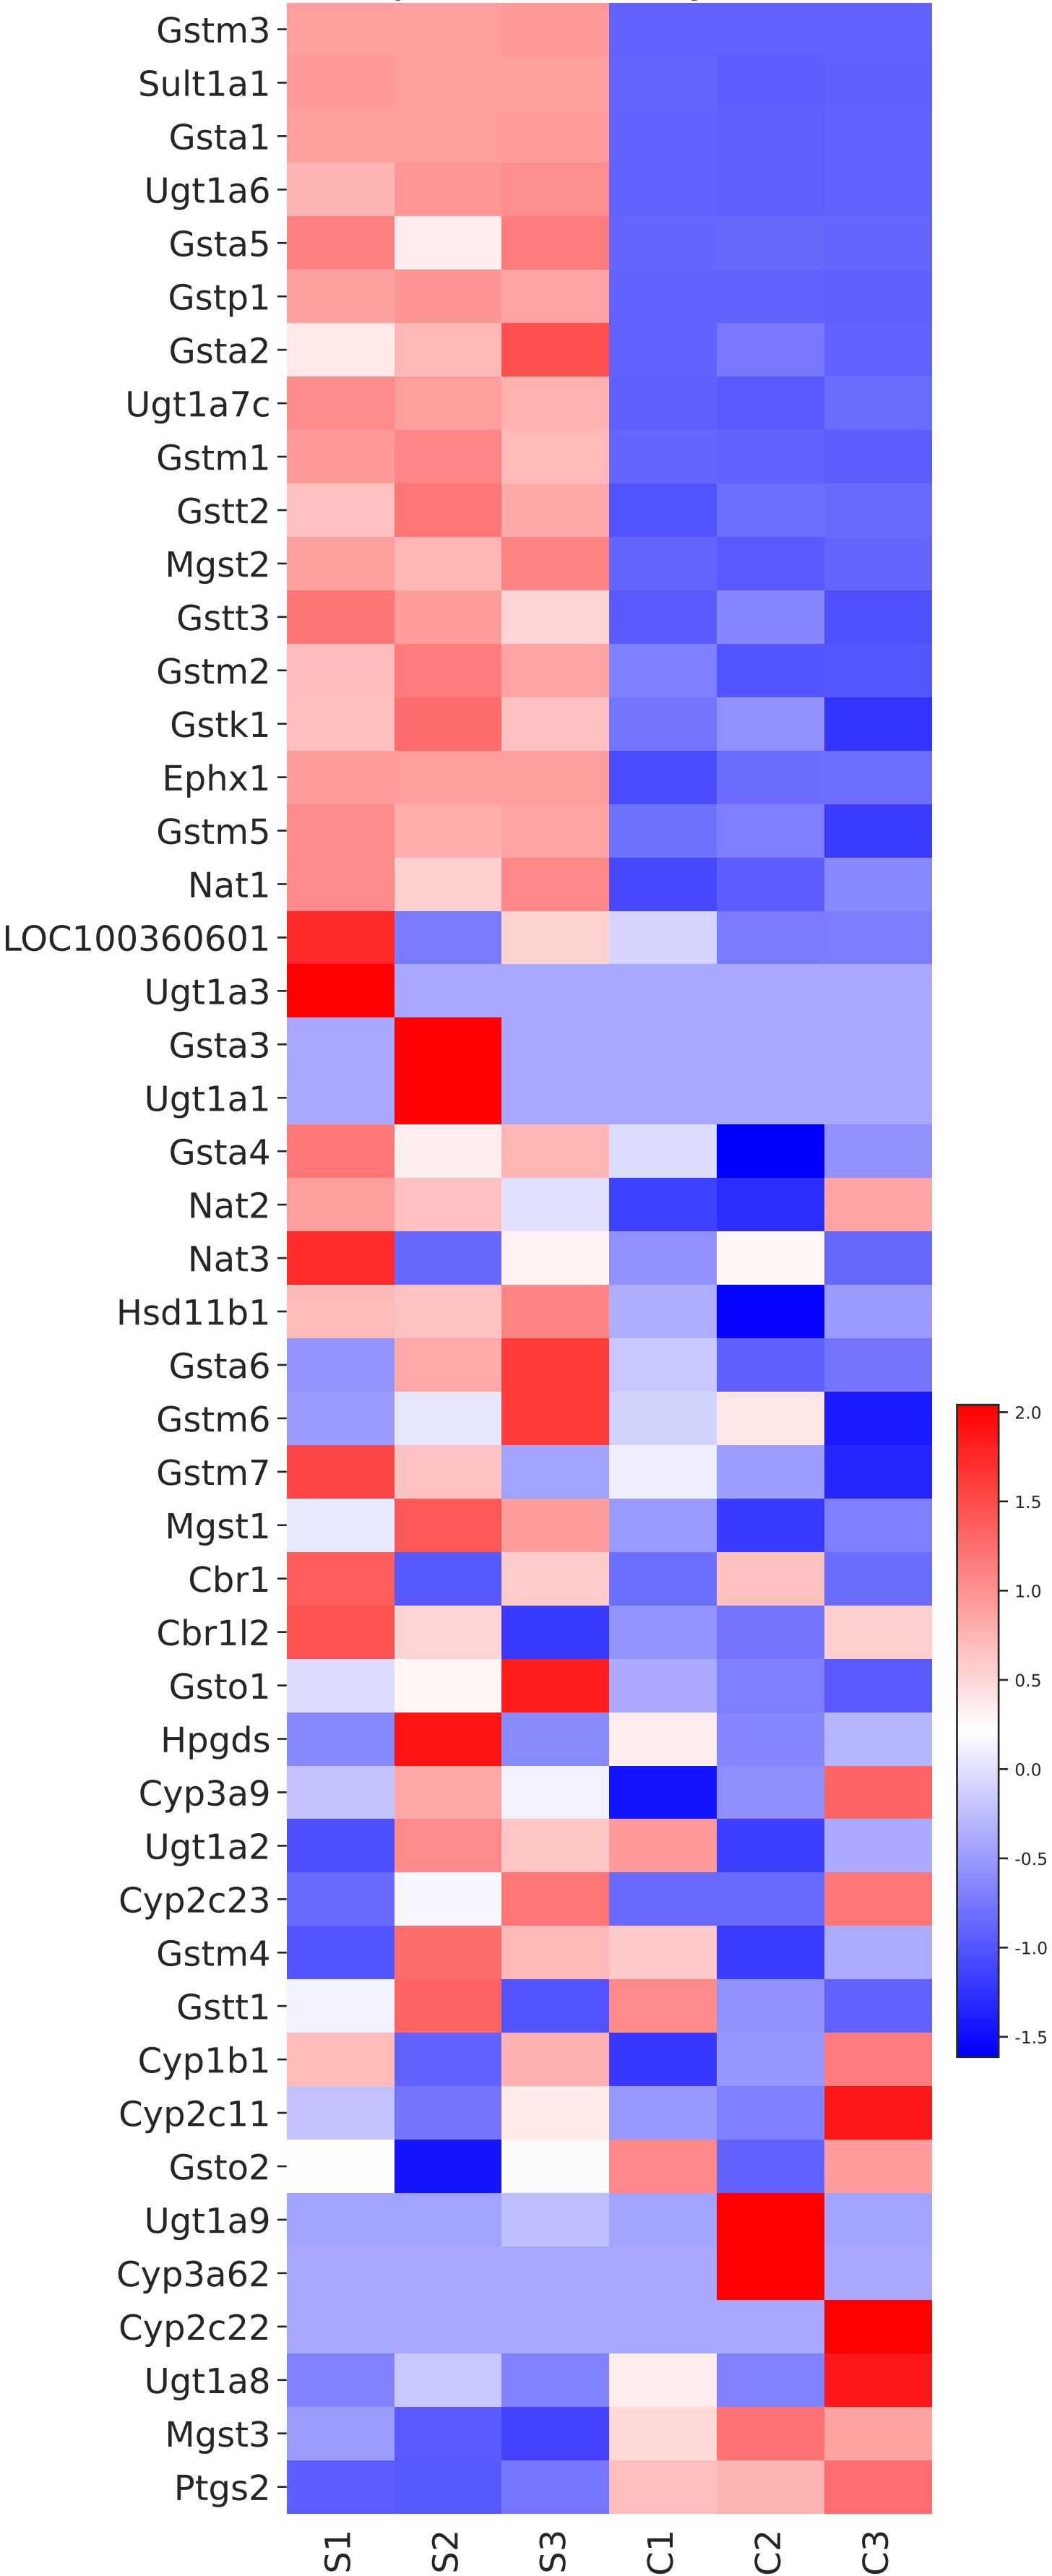

Supplement: Supplementary file 164 [file 5_Chemical carcinogenesis - DNA adducts(rno05204).heatmap.pdf › Source data/1.RNA-Seq source data/1.BMSCs/result/1.6.GSEA/S-vs-C/kegg/5_Chemical carcinogenesis - DNA adducts(rno05204).heatmap.pdf]

# DNA replication(rno03030)

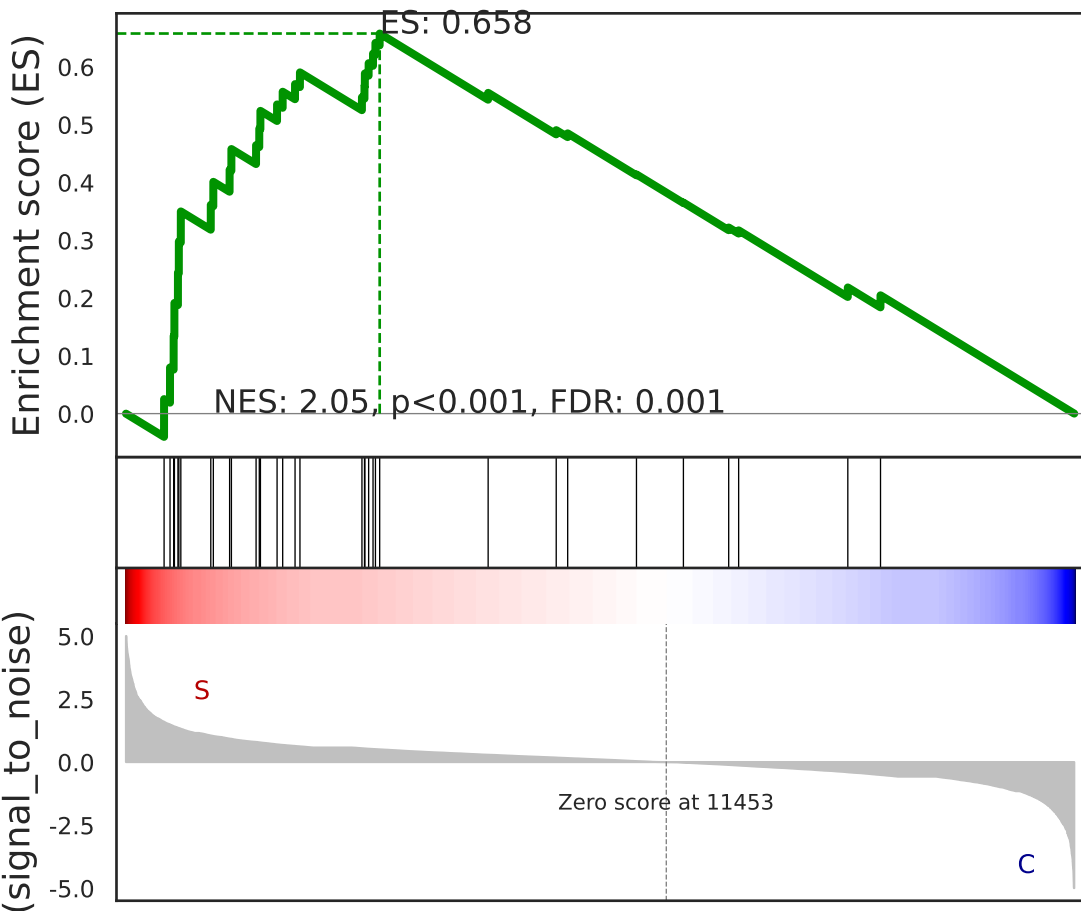

Supplement: Supplementary file 165 [file 6_DNA replication(rno03030).gsea.pdf › Source data/1.RNA-Seq source data/1.BMSCs/result/1.6.GSEA/S-vs-C/kegg/6_DNA replication(rno03030).gsea.pdf]

DNA replication(rno03030)  
Heatmap of the Analyzed GeneSet

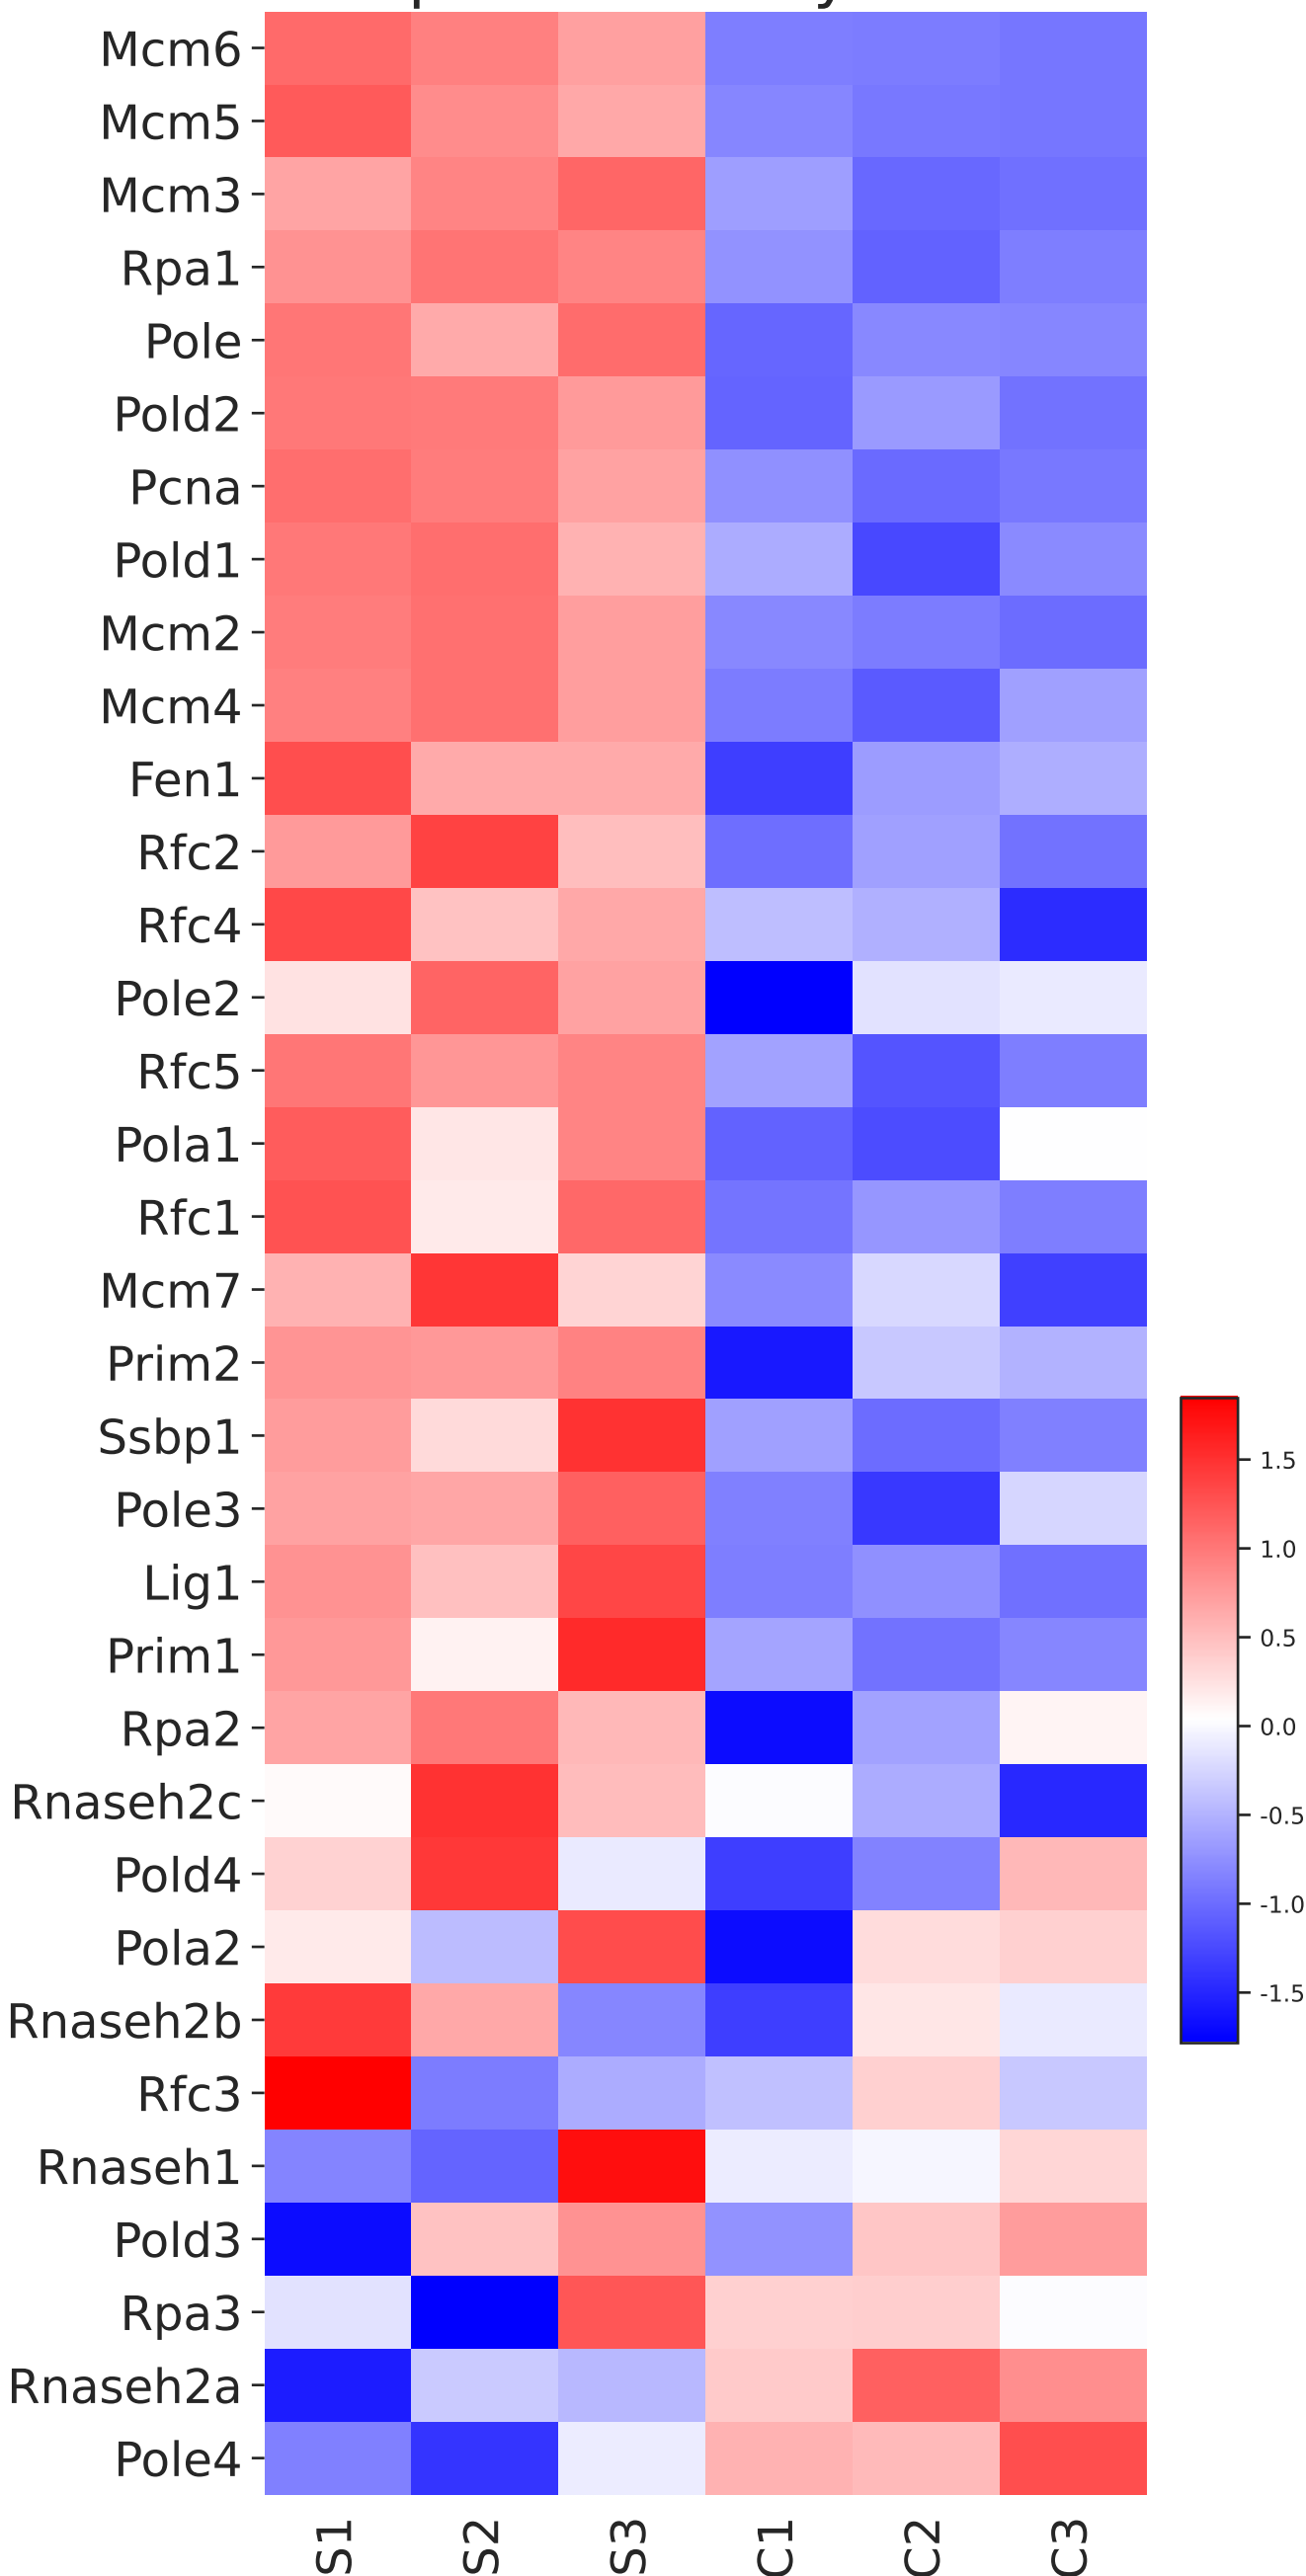

Supplement: Supplementary file 166 [file 6_DNA replication(rno03030).heatmap.pdf › Source data/1.RNA-Seq source data/1.BMSCs/result/1.6.GSEA/S-vs-C/kegg/6_DNA replication(rno03030).heatmap.pdf]

# Cell cycle(rno04110)

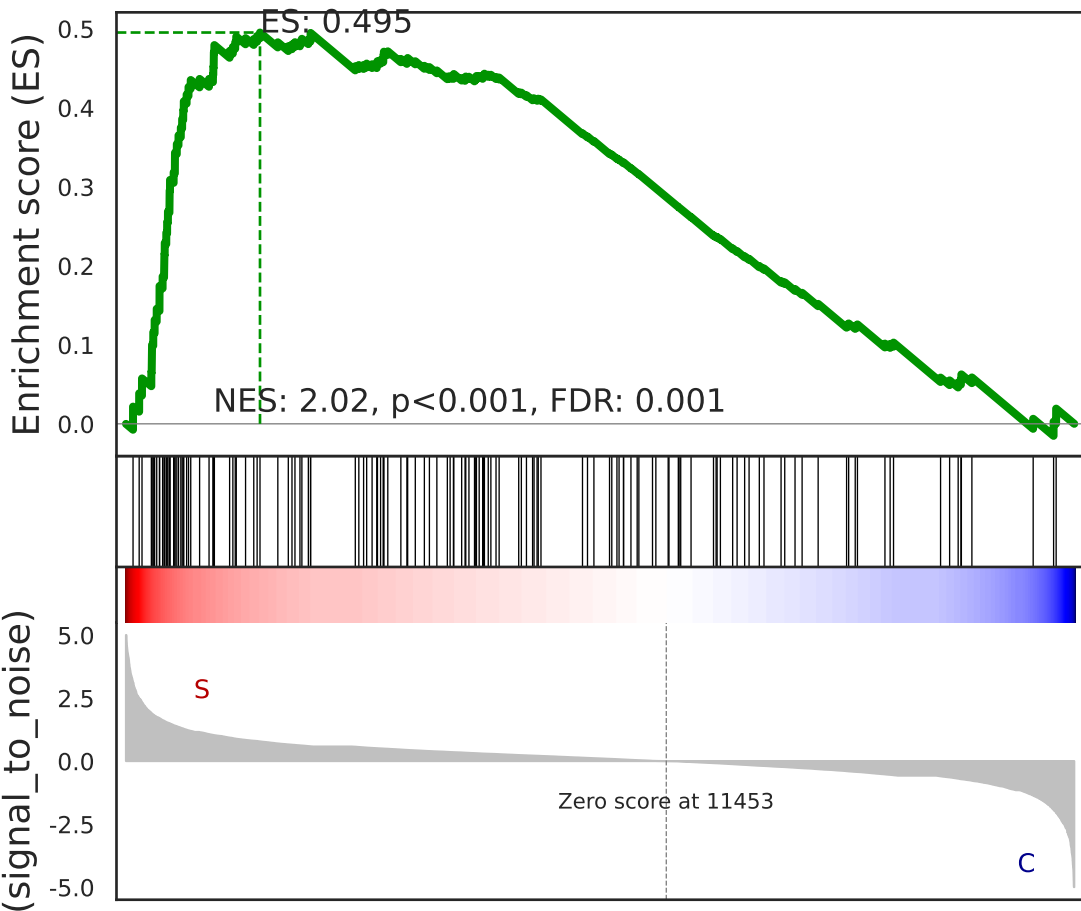

Supplement: Supplementary file 167 [file 7_Cell cycle(rno04110).gsea.pdf › Source data/1.RNA-Seq source data/1.BMSCs/result/1.6.GSEA/S-vs-C/kegg/7_Cell cycle(rno04110).gsea.pdf]

# Cell cycle(rno04110)

## Heatmap of the Analyzed GeneSet

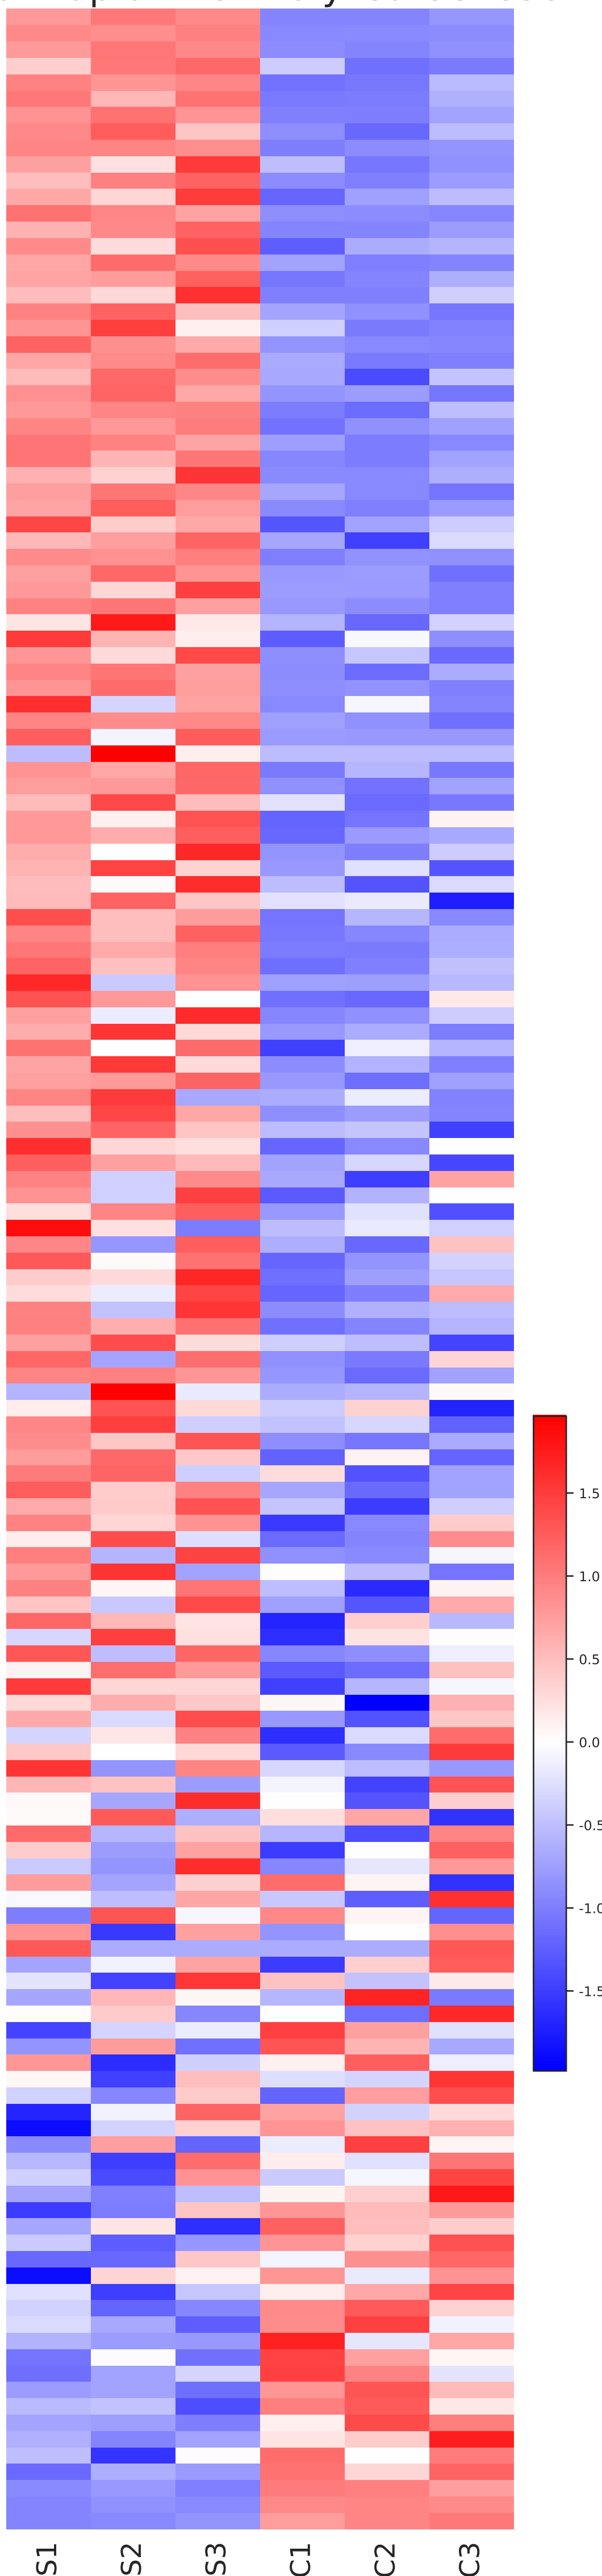

Supplement: Supplementary file 168 [file 7_Cell cycle(rno04110).heatmap.pdf › Source data/1.RNA-Seq source data/1.BMSCs/result/1.6.GSEA/S-vs-C/kegg/7_Cell cycle(rno04110).heatmap.pdf]

# Fanconi anemia pathway(rno03460)

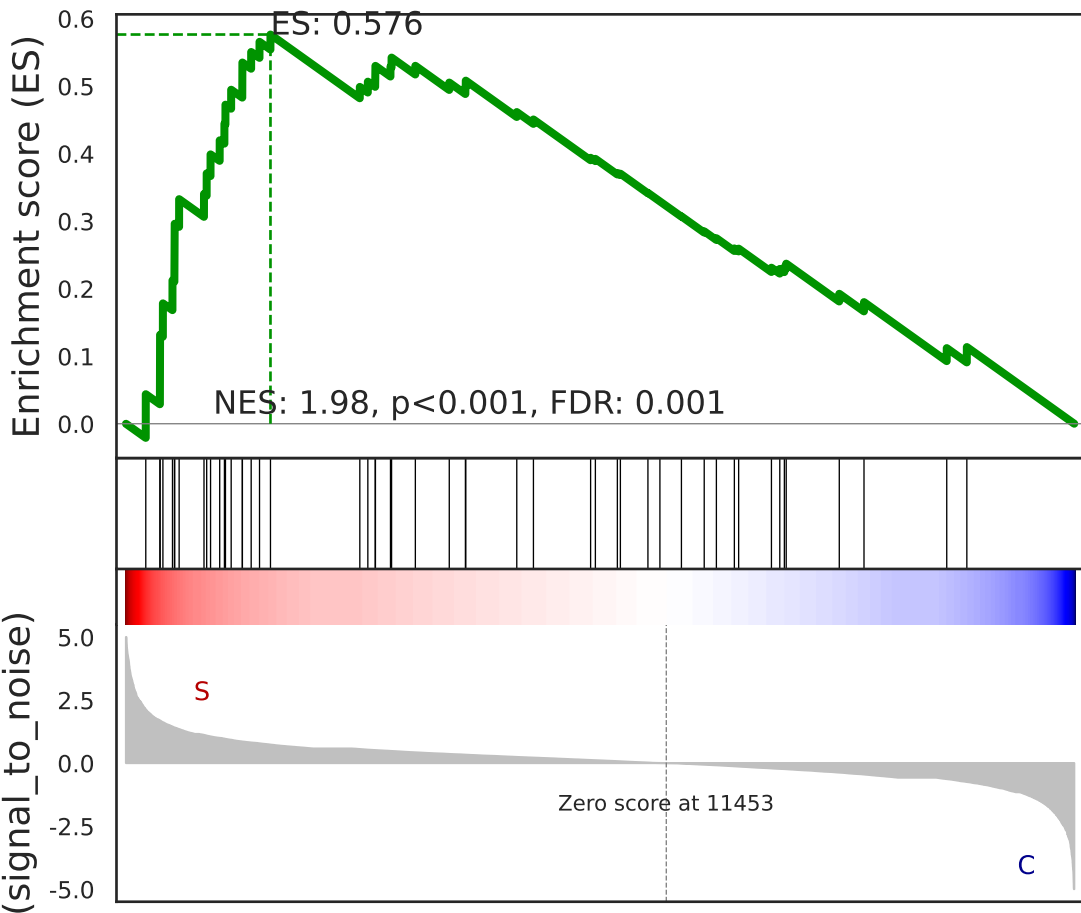

Supplement: Supplementary file 169 [file 8_Fanconi anemia pathway(rno03460).gsea.pdf › Source data/1.RNA-Seq source data/1.BMSCs/result/1.6.GSEA/S-vs-C/kegg/8_Fanconi anemia pathway(rno03460).gsea.pdf]

Fanconi anemia pathway(rno03460)  
Heatmap of the Analyzed GeneSet

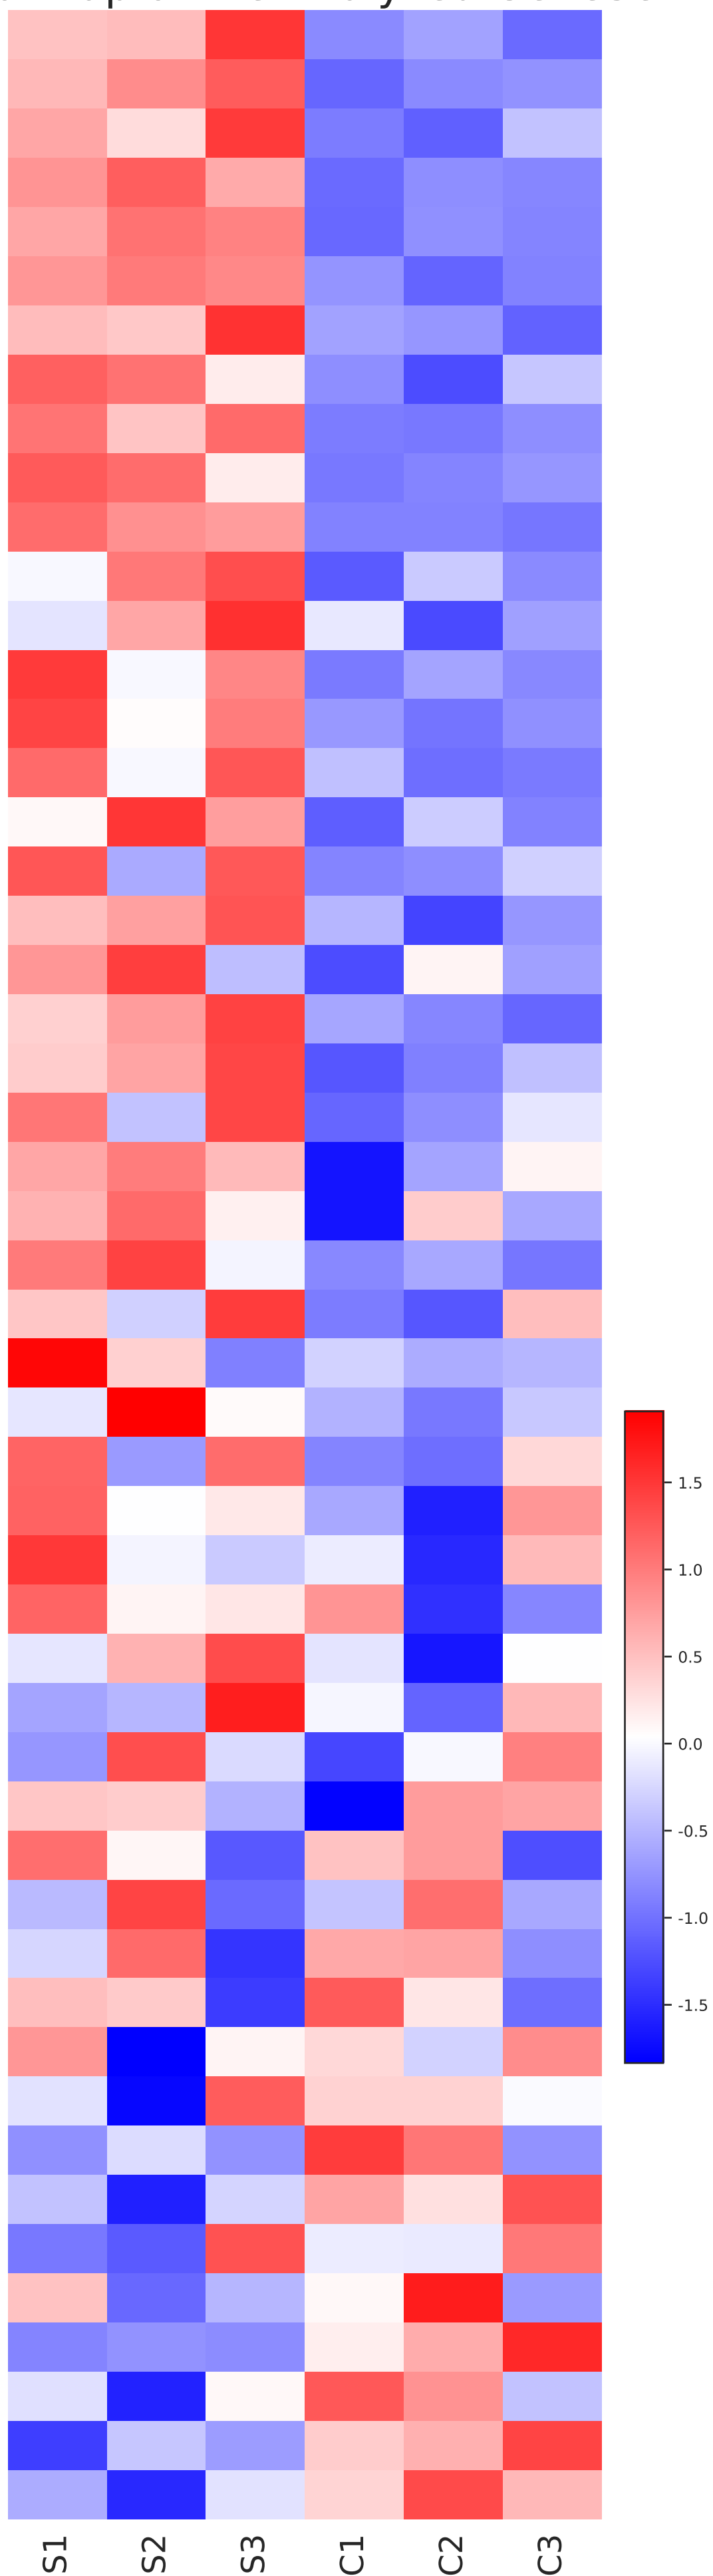

Supplement: Supplementary file 170 [file 8_Fanconi anemia pathway(rno03460).heatmap.pdf › Source data/1.RNA-Seq source data/1.BMSCs/result/1.6.GSEA/S-vs-C/kegg/8_Fanconi anemia pathway(rno03460).heatmap.pdf]

# Mineral absorption(rno04978)

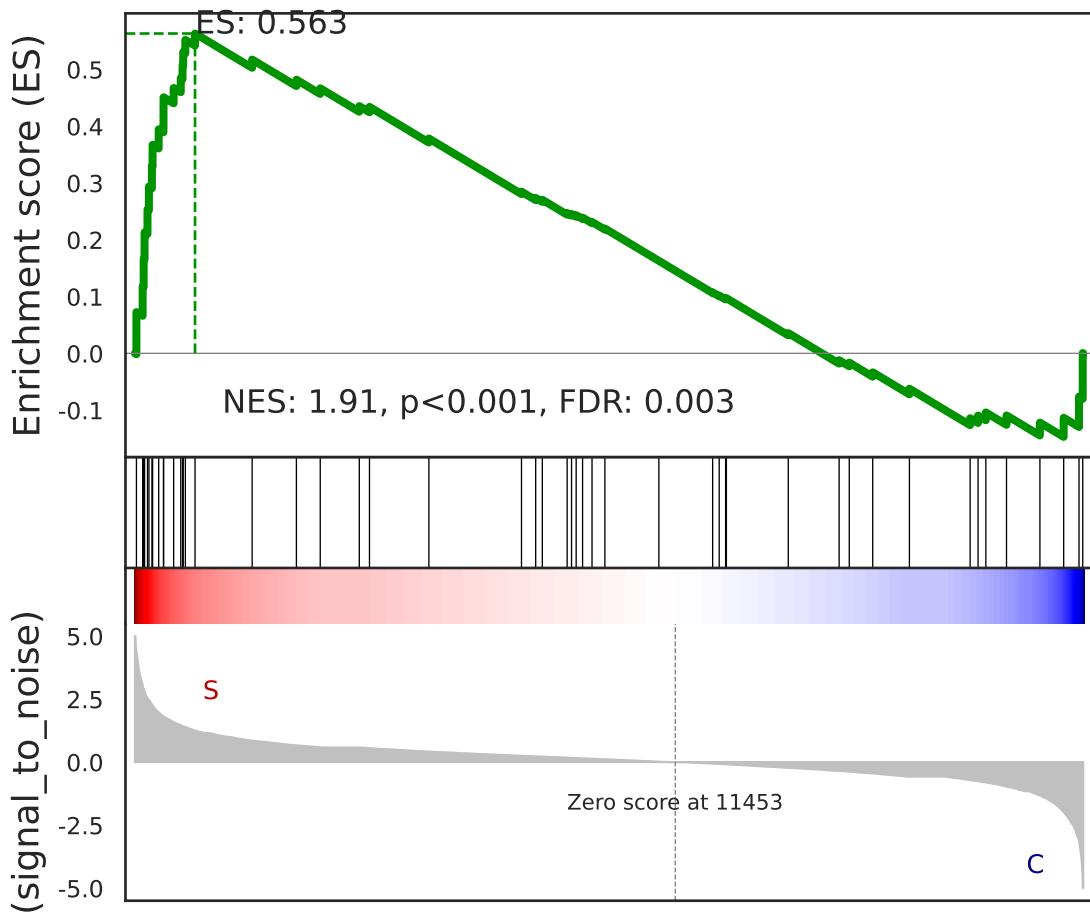

Supplement: Supplementary file 171 [file 9_Mineral absorption(rno04978).gsea.pdf › Source data/1.RNA-Seq source data/1.BMSCs/result/1.6.GSEA/S-vs-C/kegg/9_Mineral absorption(rno04978).gsea.pdf]

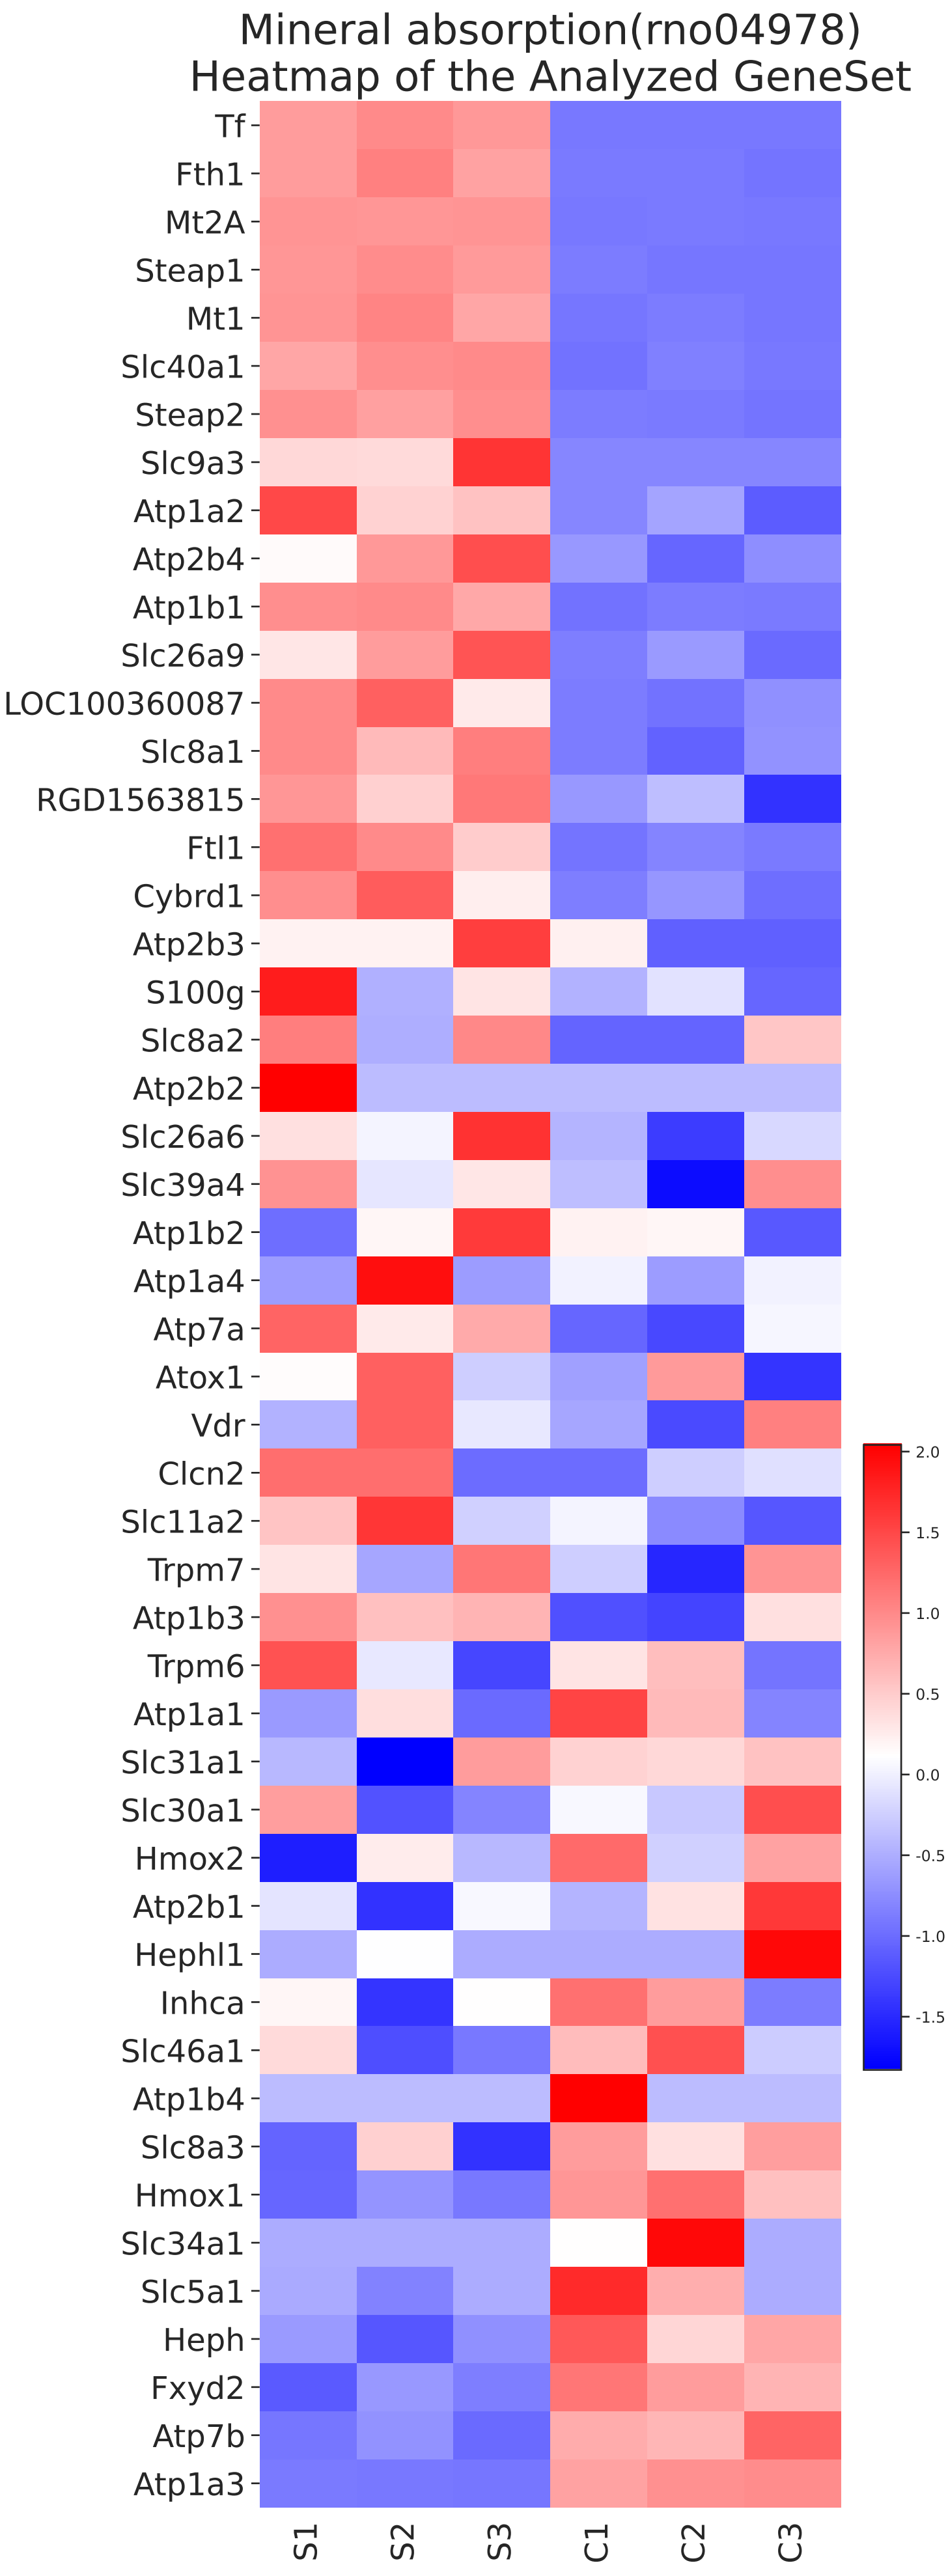

Supplement: Supplementary file 172 [file 9_Mineral absorption(rno04978).heatmap.pdf › Source data/1.RNA-Seq source data/1.BMSCs/result/1.6.GSEA/S-vs-C/kegg/9_Mineral absorption(rno04978).heatmap.pdf]

# Separation of Sister Chromatids(R-RNO-2467813)

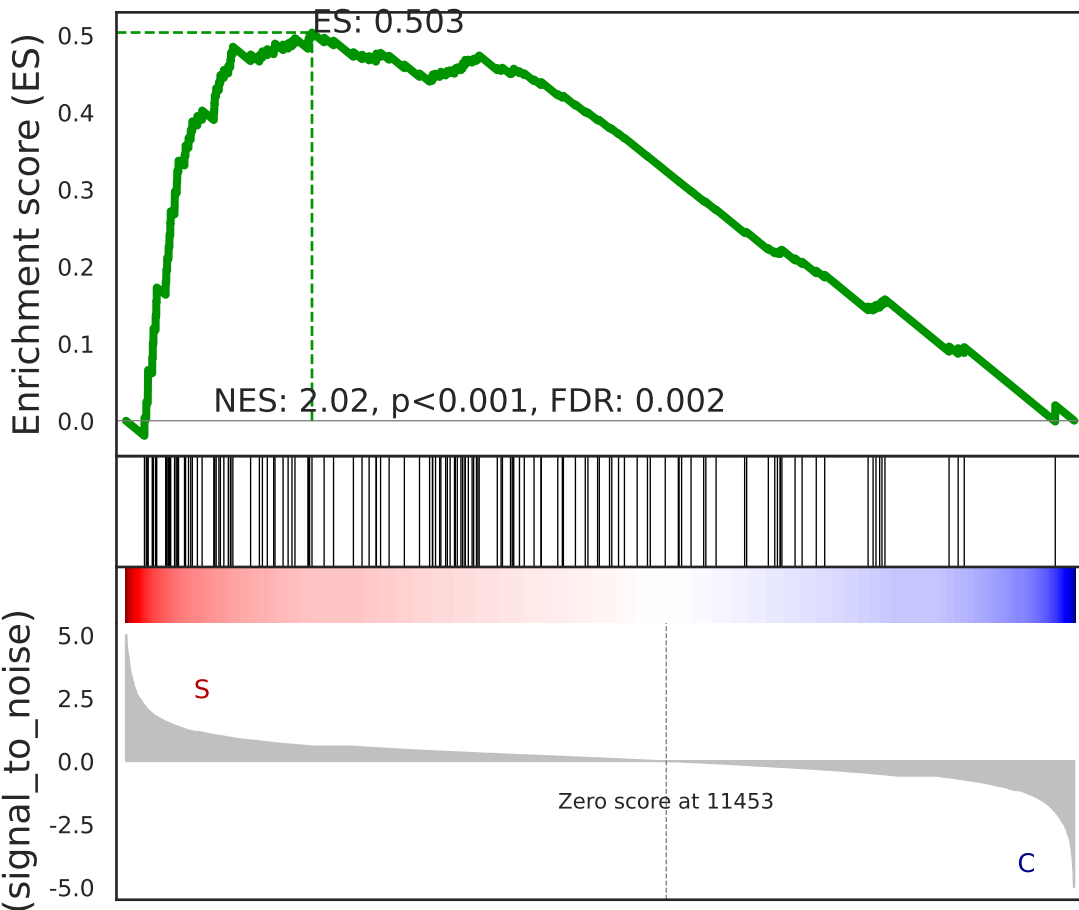

Supplement: Supplementary file 173 [file 10_Separation of Sister Chromatids(R-RNO-2467813).gsea.pdf › Source data/1.RNA-Seq source data/1.BMSCs/result/1.6.GSEA/S-vs-C/rct/10_Separation of Sister Chromatids(R-RNO-2467813).gsea.pdf]

## Separation of Sister Chromatids(R-RNO-2467813) Heatmap of the Analyzed GeneSet

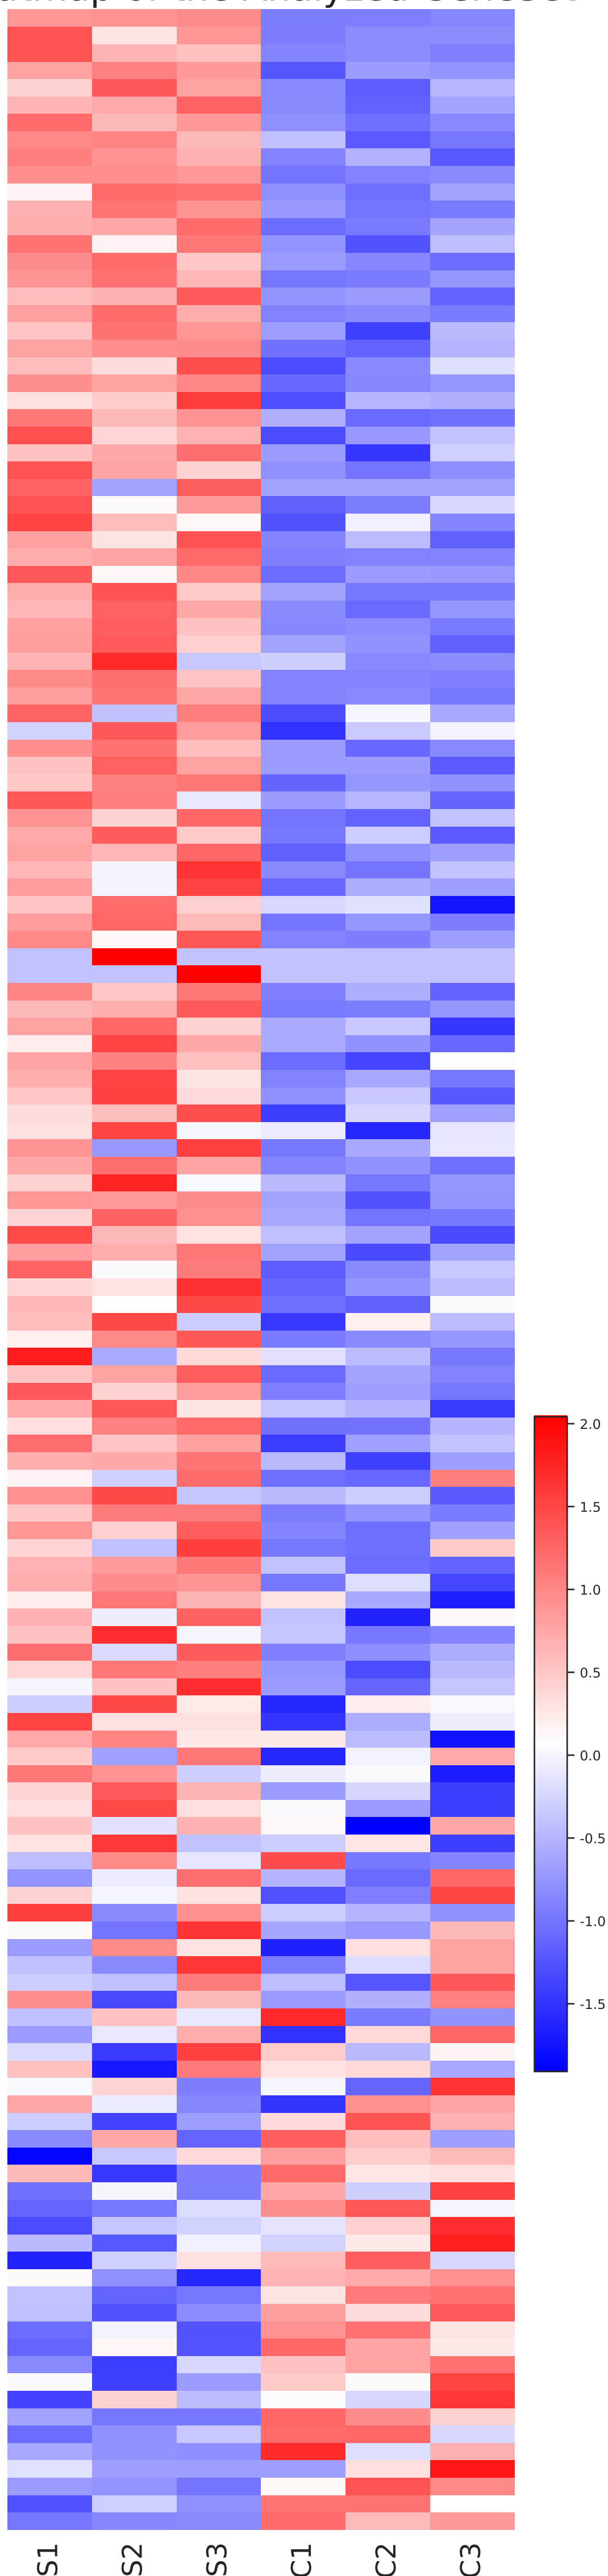

Supplement: Supplementary file 174 [file 10_Separation of Sister Chromatids(R-RNO-2467813).heatmap.pdf › Source data/1.RNA-Seq source data/1.BMSCs/result/1.6.GSEA/S-vs-C/rct/10_Separation of Sister Chromatids(R-RNO-2467813).heatmap.pdf]

# Resolution of Sister Chromatid Cohesion(R-RNO-2500257)

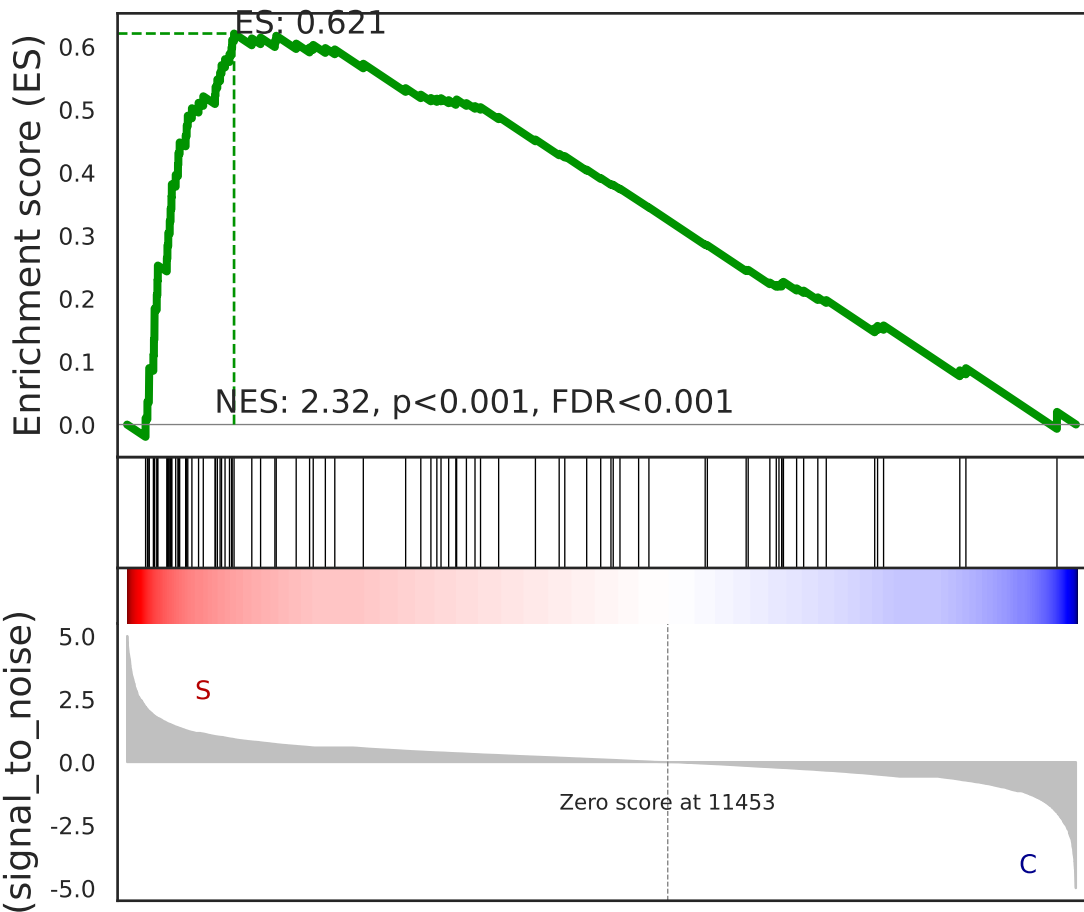

Supplement: Supplementary file 175 [file 1_Resolution of Sister Chromatid Cohesion(R-RNO-2500257).gsea.pdf › Source data/1.RNA-Seq source data/1.BMSCs/result/1.6.GSEA/S-vs-C/rct/1_Resolution of Sister Chromatid Cohesion(R-RNO-2500257).gsea.pdf]

# Resolution of Sister Chromatid Cohesion(R-RNO-2500257)

## Heatmap of the Analyzed GeneSet

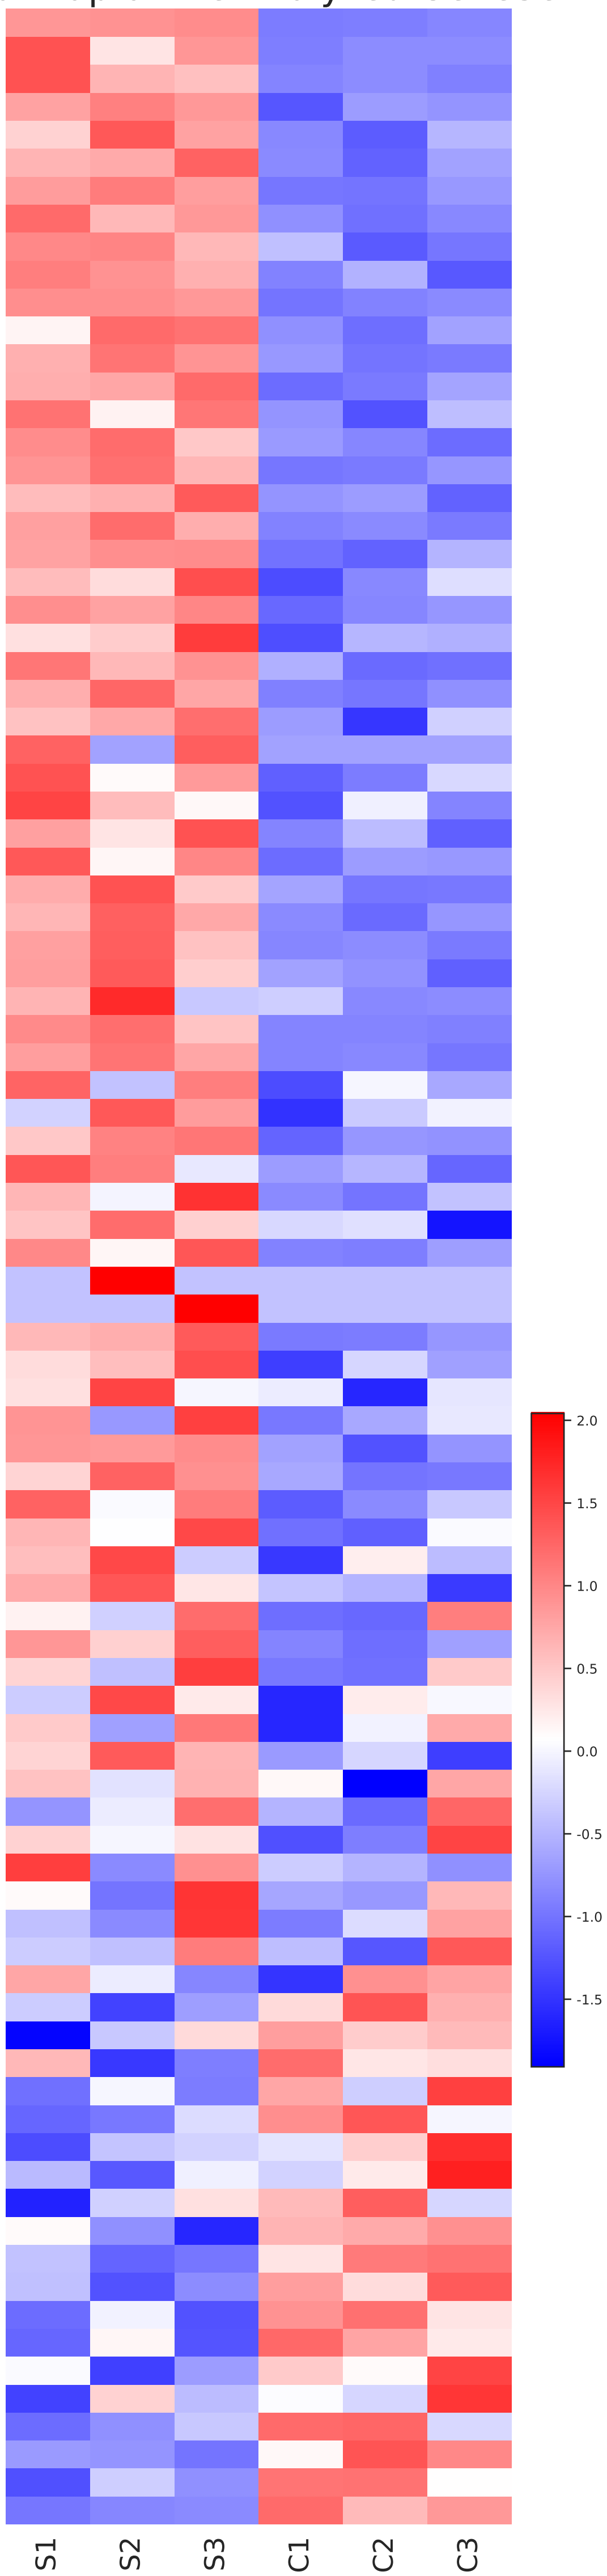

Supplement: Supplementary file 176 [file 1_Resolution of Sister Chromatid Cohesion(R-RNO-2500257).heatmap.pdf › Source data/1.RNA-Seq source data/1.BMSCs/result/1.6.GSEA/S-vs-C/rct/1_Resolution of Sister Chromatid Cohesion(R-RNO-2500257).heatmap.pdf]

# EML4 and NUDC in mitotic spindle formation(R-RNO-9648025)

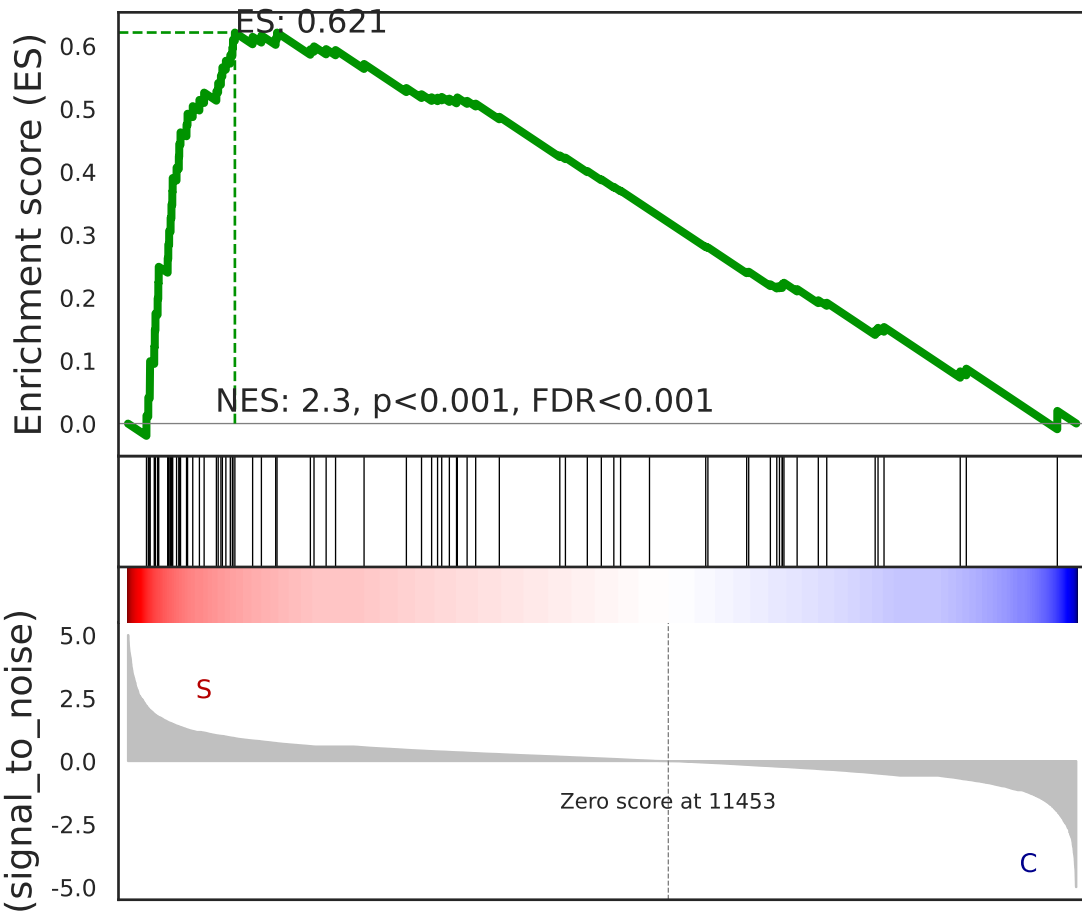

Supplement: Supplementary file 177 [file 2_EML4 and NUDC in mitotic spindle formation(R-RNO-9648025).gsea.pdf › Source data/1.RNA-Seq source data/1.BMSCs/result/1.6.GSEA/S-vs-C/rct/2_EML4 and NUDC in mitotic spindle formation(R-RNO-9648025).gsea.pdf]

EML4 and NUDC in mitotic spindle formation(R-RNO-9648025)  
Heatmap of the Analyzed GeneSet

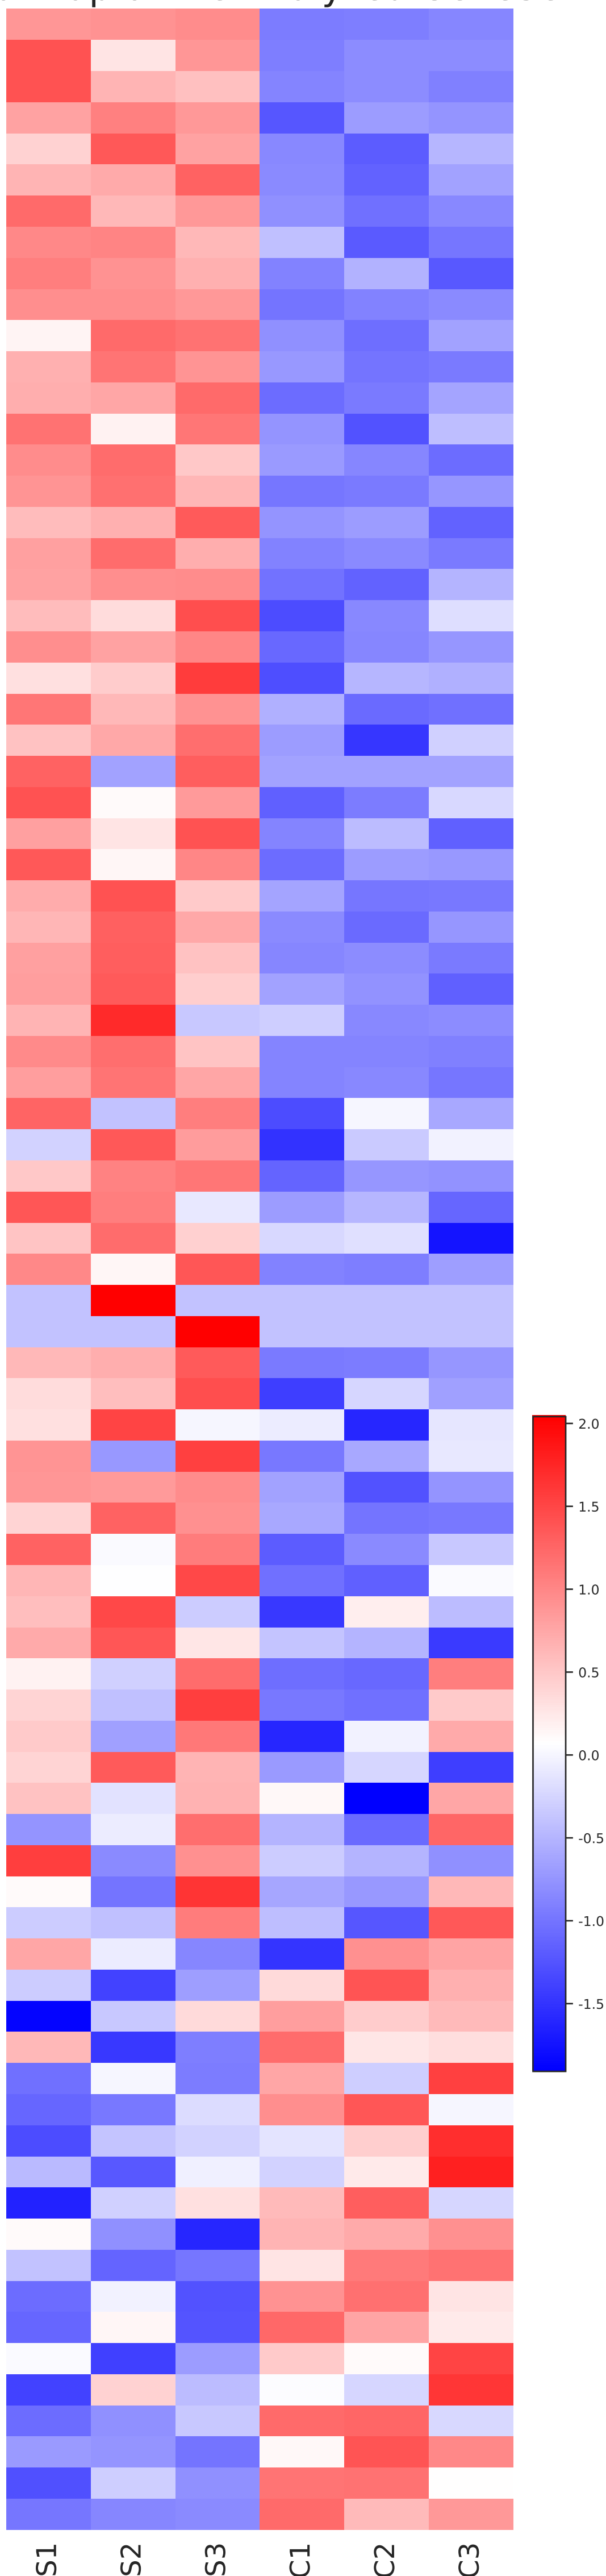

Supplement: Supplementary file 178 [file 2_EML4 and NUDC in mitotic spindle formation(R-RNO-9648025).heatmap.pdf › Source data/1.RNA-Seq source data/1.BMSCs/result/1.6.GSEA/S-vs-C/rct/2_EML4 and NUDC in mitotic spindle formation(R-RNO-9648025).heatmap.pdf]

**Amplification of signal from unattached kinetochores vi...(R-RNO-141444)**

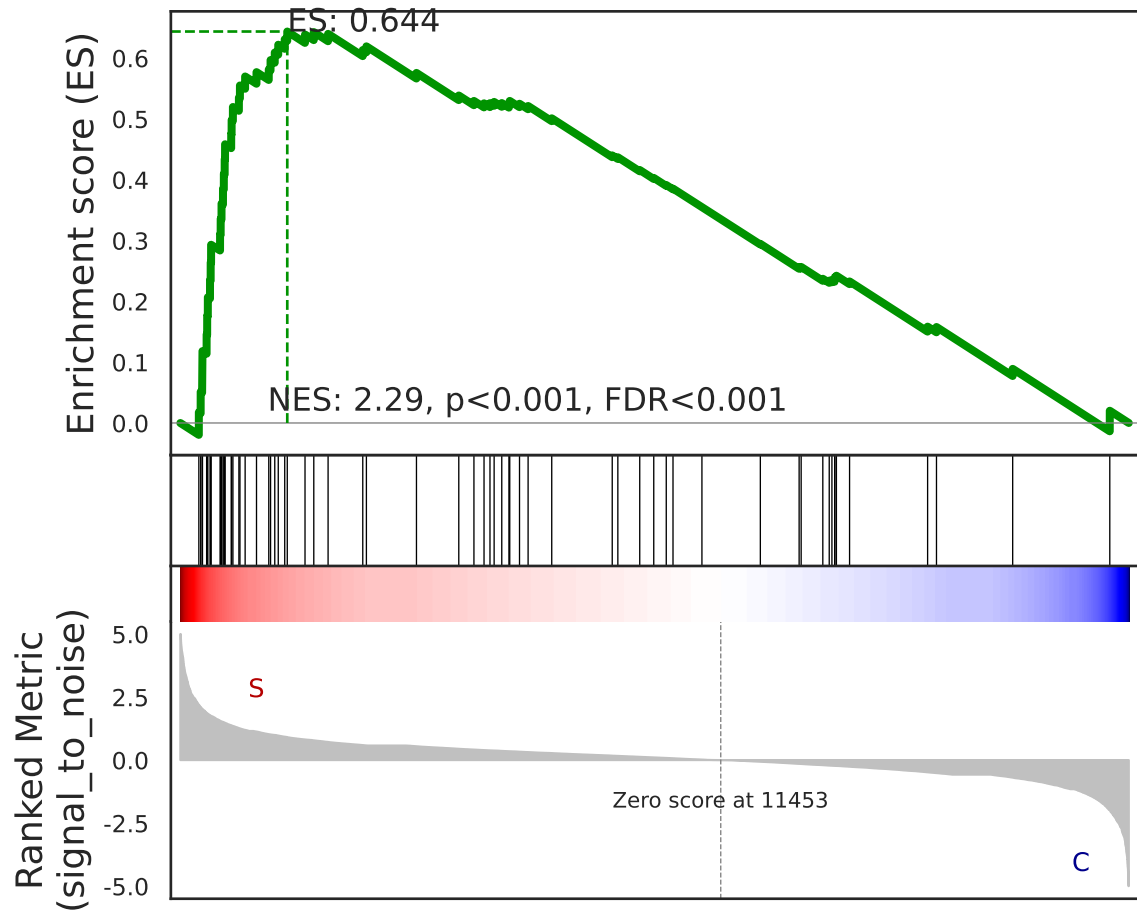

Supplement: Supplementary file 179 [file 3_Amplification of signal from unattached kinetochores vi...(R-RNO-141444).gsea.pdf › Source data/1.RNA-Seq source data/1.BMSCs/result/1.6.GSEA/S-vs-C/rct/3_Amplification of signal from unattached kinetochores vi...(R-RNO-141444).gsea.pdf]

# Amplification of signal from the kinetochores(R-RNO-141424)

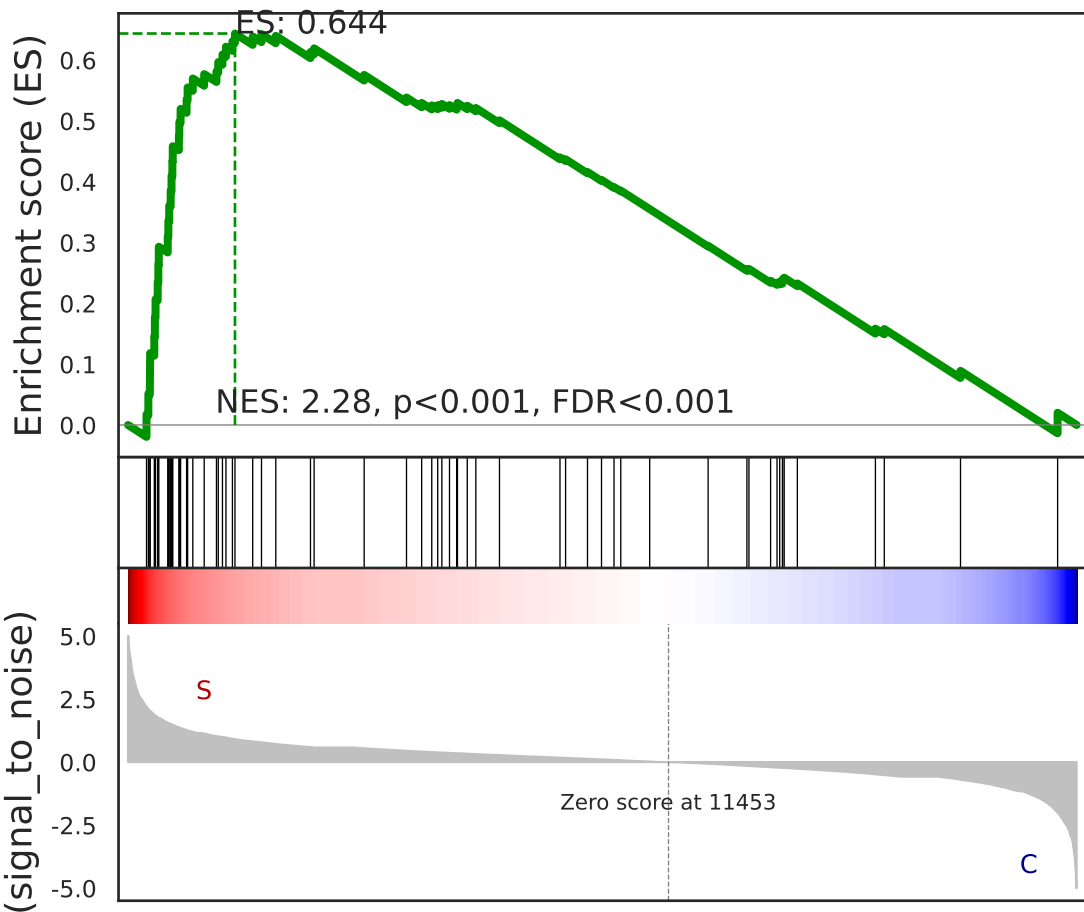

Supplement: Supplementary file 181 [file 4_Amplification of signal from the kinetochores(R-RNO-141424).gsea.pdf › Source data/1.RNA-Seq source data/1.BMSCs/result/1.6.GSEA/S-vs-C/rct/4_Amplification of signal from the kinetochores(R-RNO-141424).gsea.pdf]

Amplification of signal from the kinetochores(R-RNO-141424)  
Heatmap of the Analyzed GeneSet

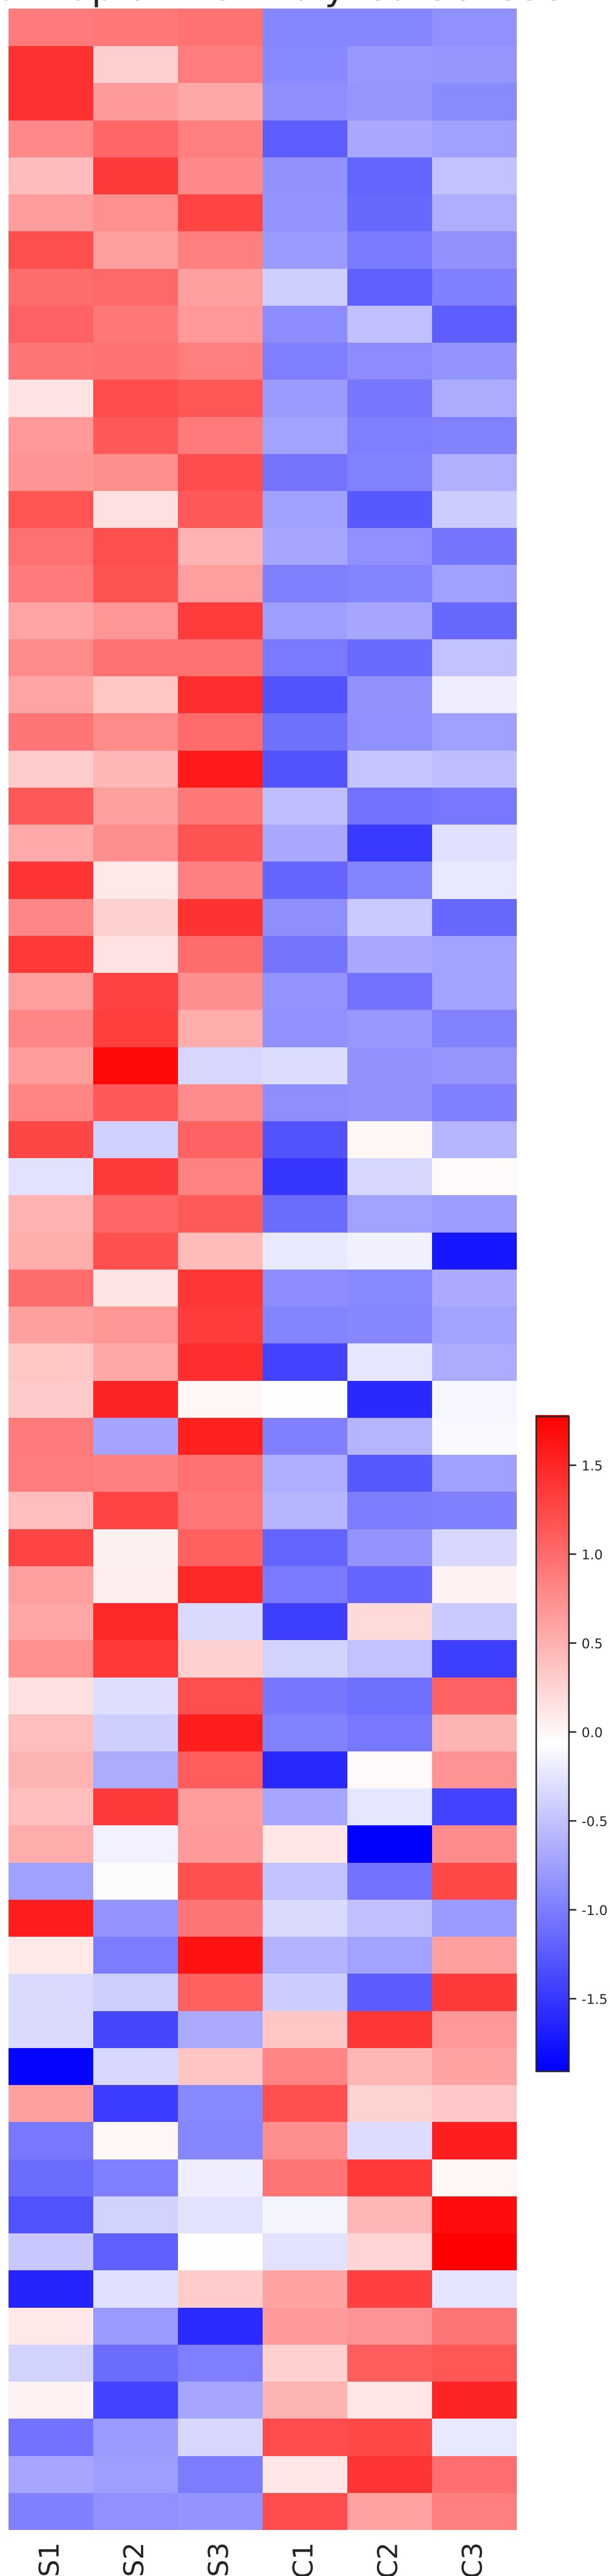

Supplement: Supplementary file 182 [file 4_Amplification of signal from the kinetochores(R-RNO-141424).heatmap.pdf › Source data/1.RNA-Seq source data/1.BMSCs/result/1.6.GSEA/S-vs-C/rct/4_Amplification of signal from the kinetochores(R-RNO-141424).heatmap.pdf]

# Mitotic Spindle Checkpoint(R-RNO-69618)

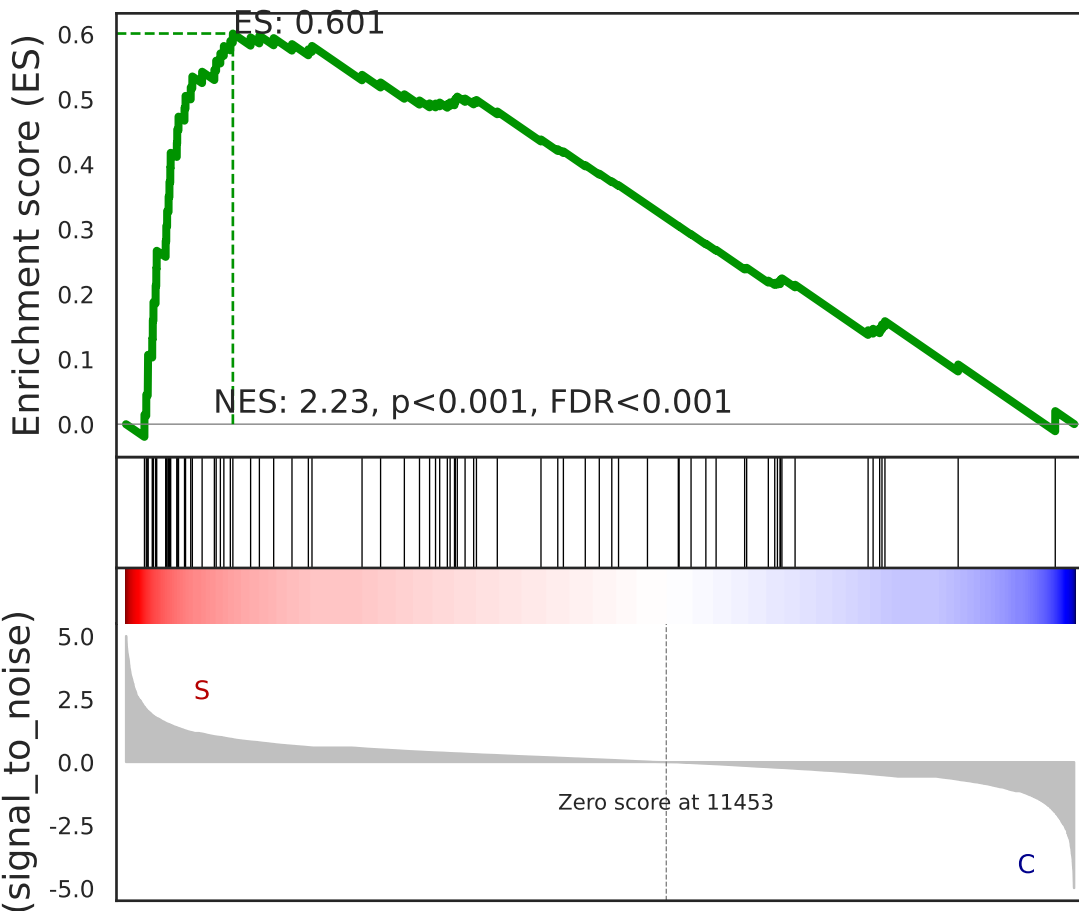

Supplement: Supplementary file 183 [file 5_Mitotic Spindle Checkpoint(R-RNO-69618).gsea.pdf › Source data/1.RNA-Seq source data/1.BMSCs/result/1.6.GSEA/S-vs-C/rct/5_Mitotic Spindle Checkpoint(R-RNO-69618).gsea.pdf]

Mitotic Spindle Checkpoint(R-RNO-69618)  
Heatmap of the Analyzed GeneSet

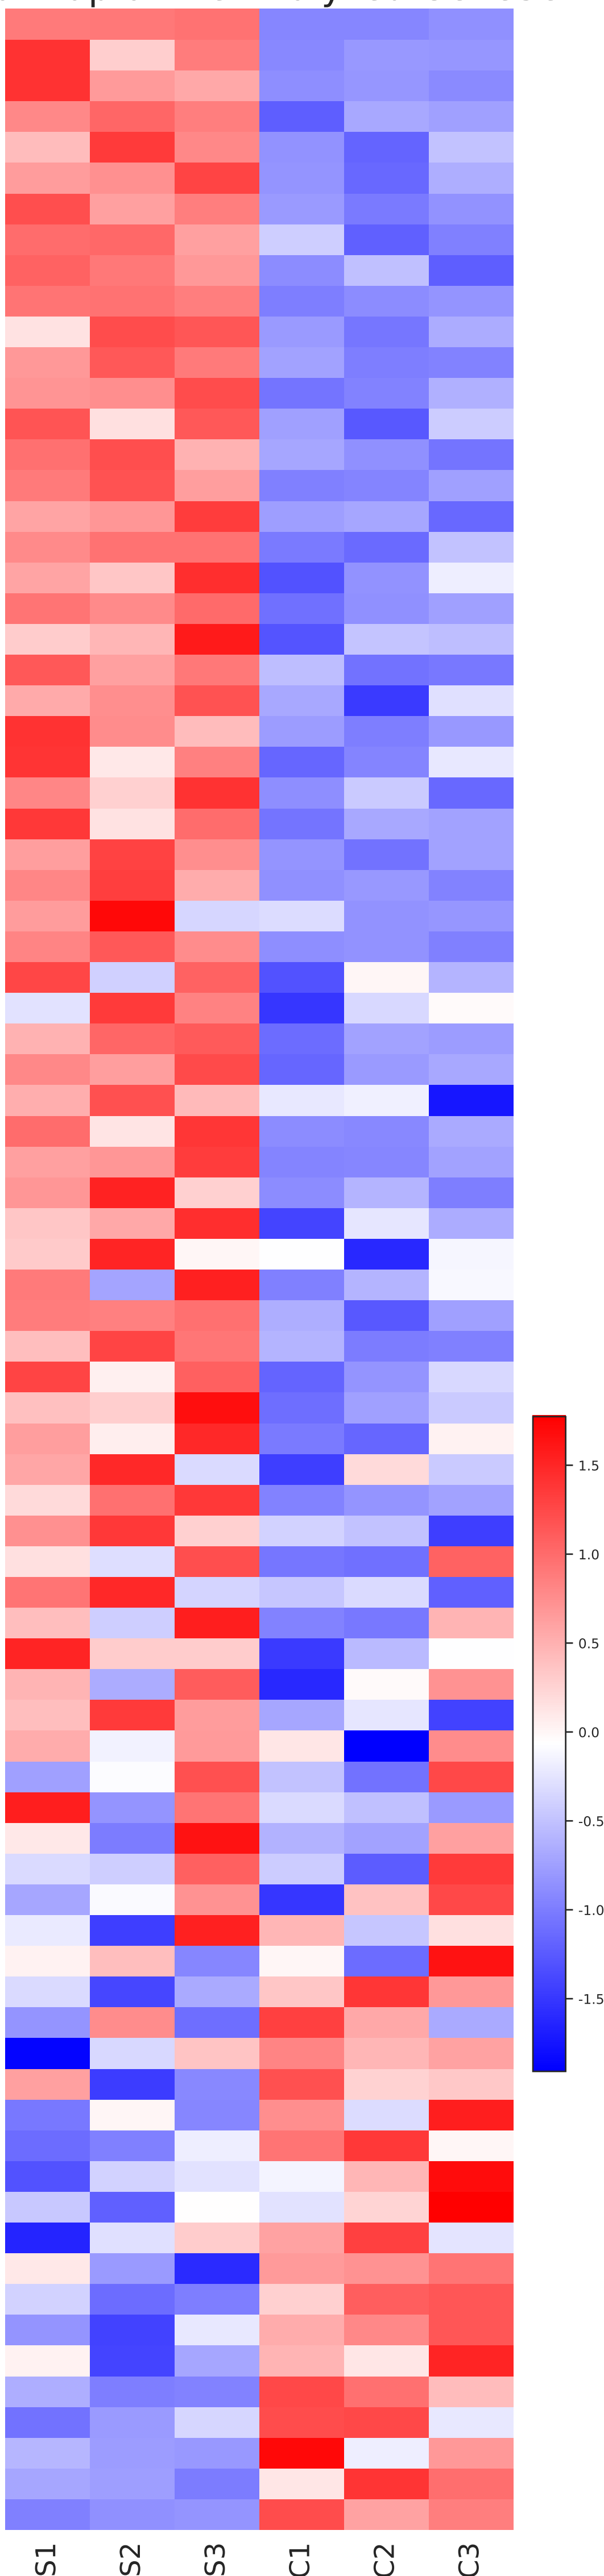

Supplement: Supplementary file 184 [file 5_Mitotic Spindle Checkpoint(R-RNO-69618).heatmap.pdf › Source data/1.RNA-Seq source data/1.BMSCs/result/1.6.GSEA/S-vs-C/rct/5_Mitotic Spindle Checkpoint(R-RNO-69618).heatmap.pdf]

# Mitotic Prometaphase(R-RNO-68877)

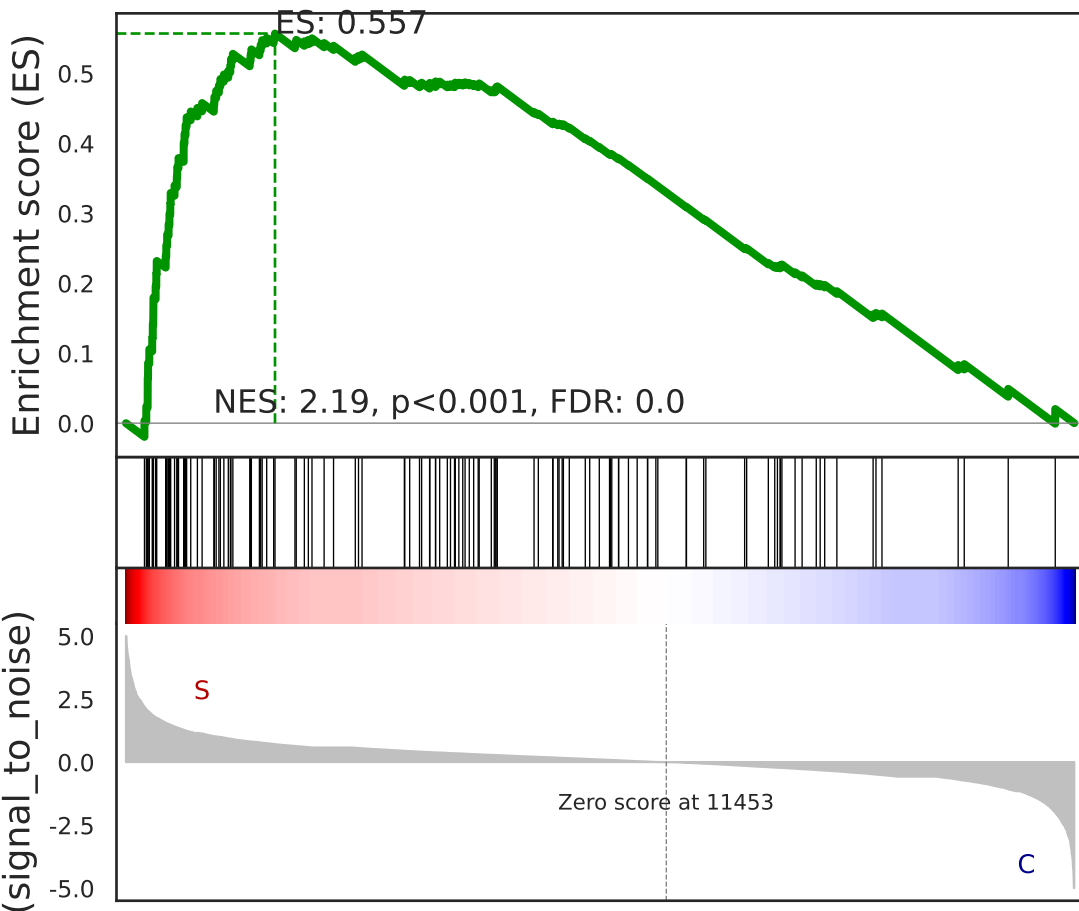

Supplement: Supplementary file 185 [file 6_Mitotic Prometaphase(R-RNO-68877).gsea.pdf › Source data/1.RNA-Seq source data/1.BMSCs/result/1.6.GSEA/S-vs-C/rct/6_Mitotic Prometaphase(R-RNO-68877).gsea.pdf]

Mitotic Prometaphase(R-RNO-68877)  
Heatmap of the Analyzed GeneSet

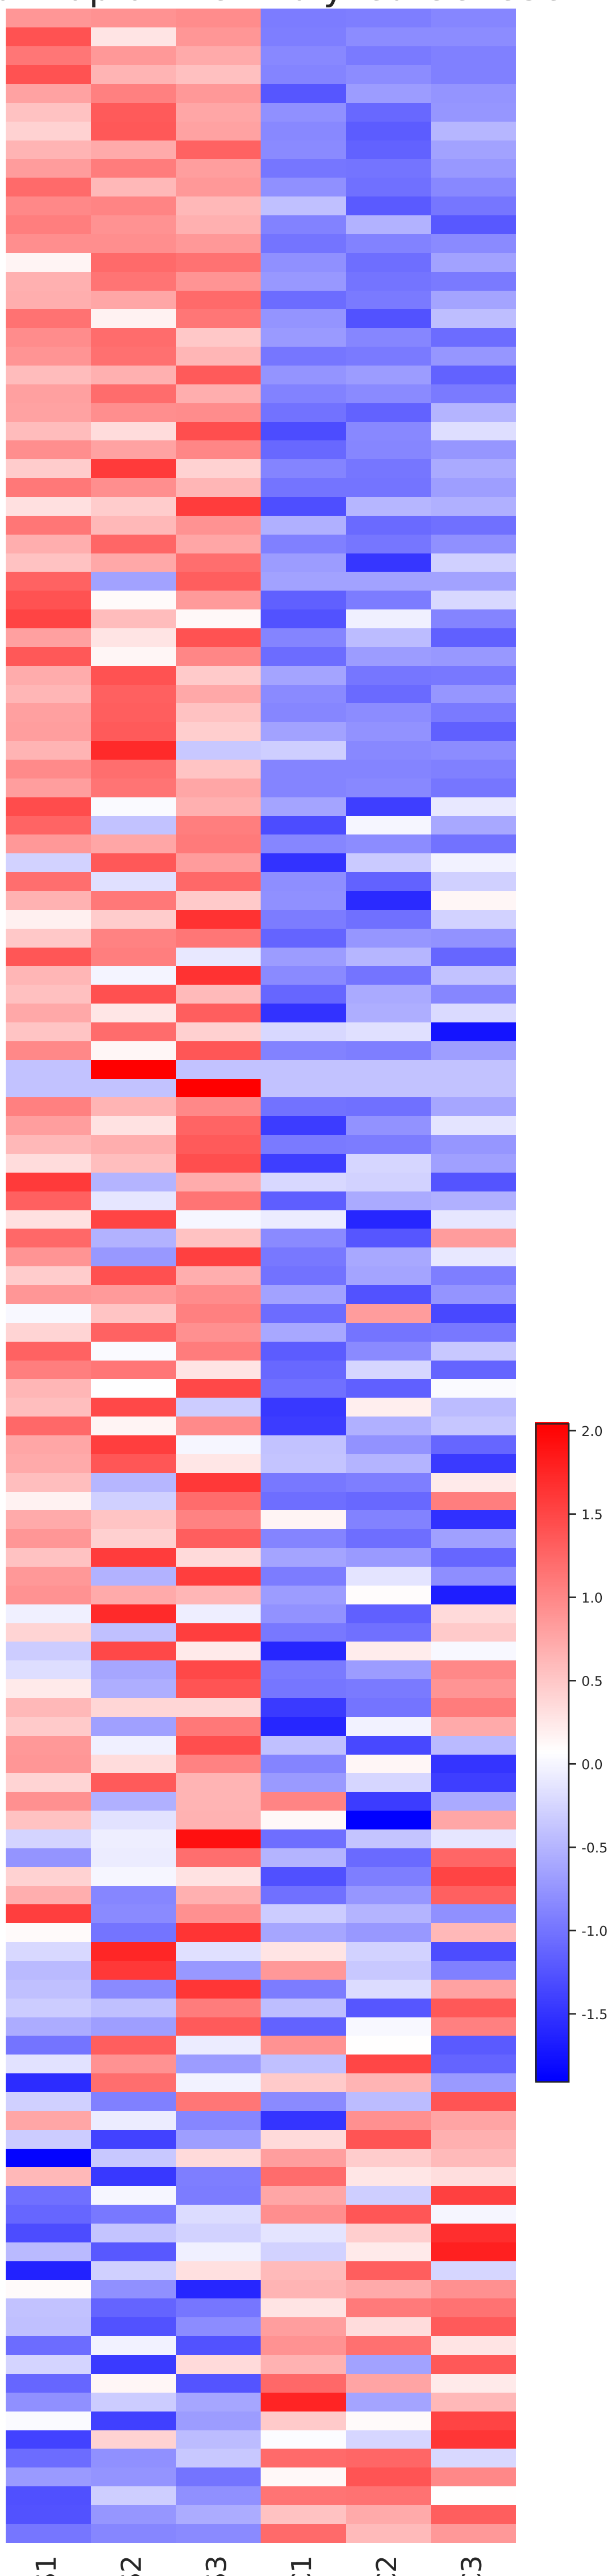

Supplement: Supplementary file 186 [file 6_Mitotic Prometaphase(R-RNO-68877).heatmap.pdf › Source data/1.RNA-Seq source data/1.BMSCs/result/1.6.GSEA/S-vs-C/rct/6_Mitotic Prometaphase(R-RNO-68877).heatmap.pdf]

# Collagen chain trimerization(R-RNO-8948216)

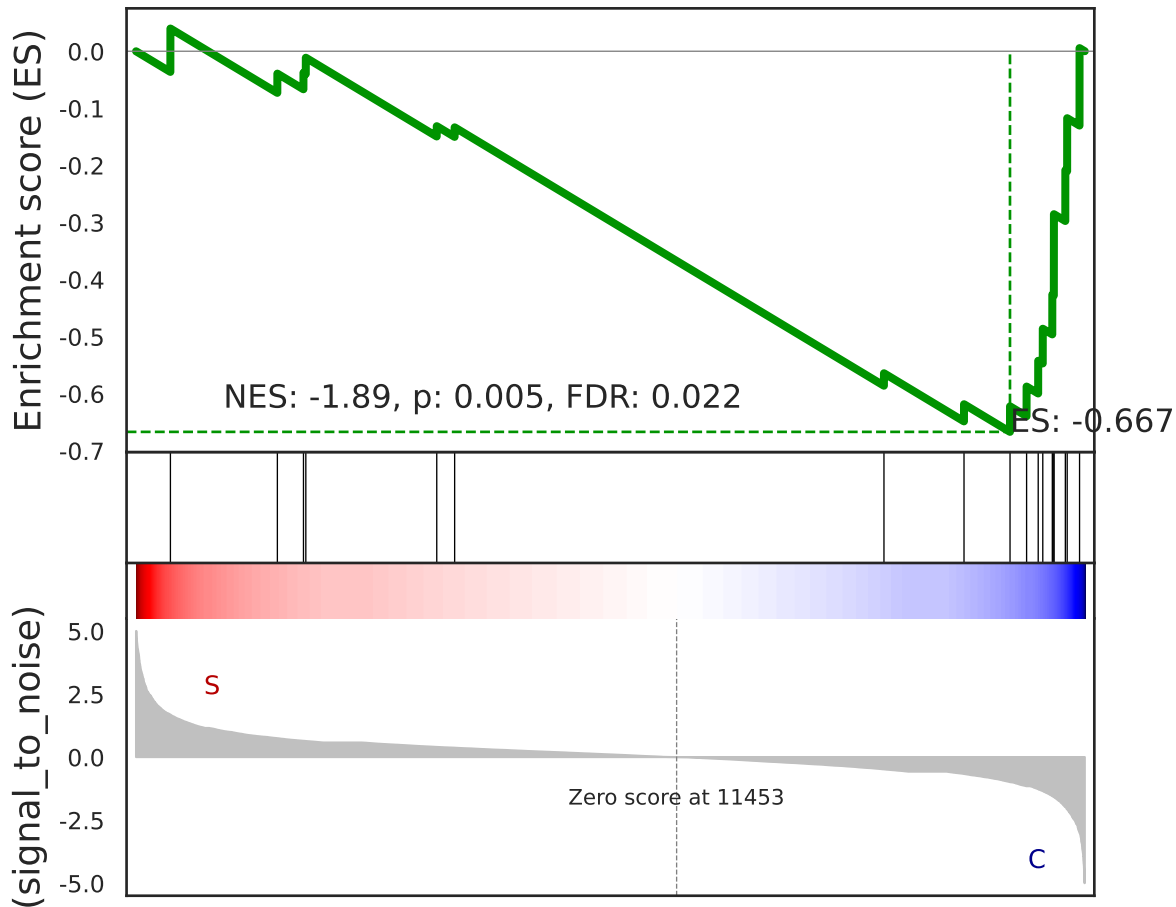

Supplement: Supplementary file 187 [file 777_Collagen chain trimerization(R-RNO-8948216).gsea.pdf › Source data/1.RNA-Seq source data/1.BMSCs/result/1.6.GSEA/S-vs-C/rct/777_Collagen chain trimerization(R-RNO-8948216).gsea.pdf]

# Collagen chain trimerization(R-RNO-8948216)

## Heatmap of the Analyzed GeneSet

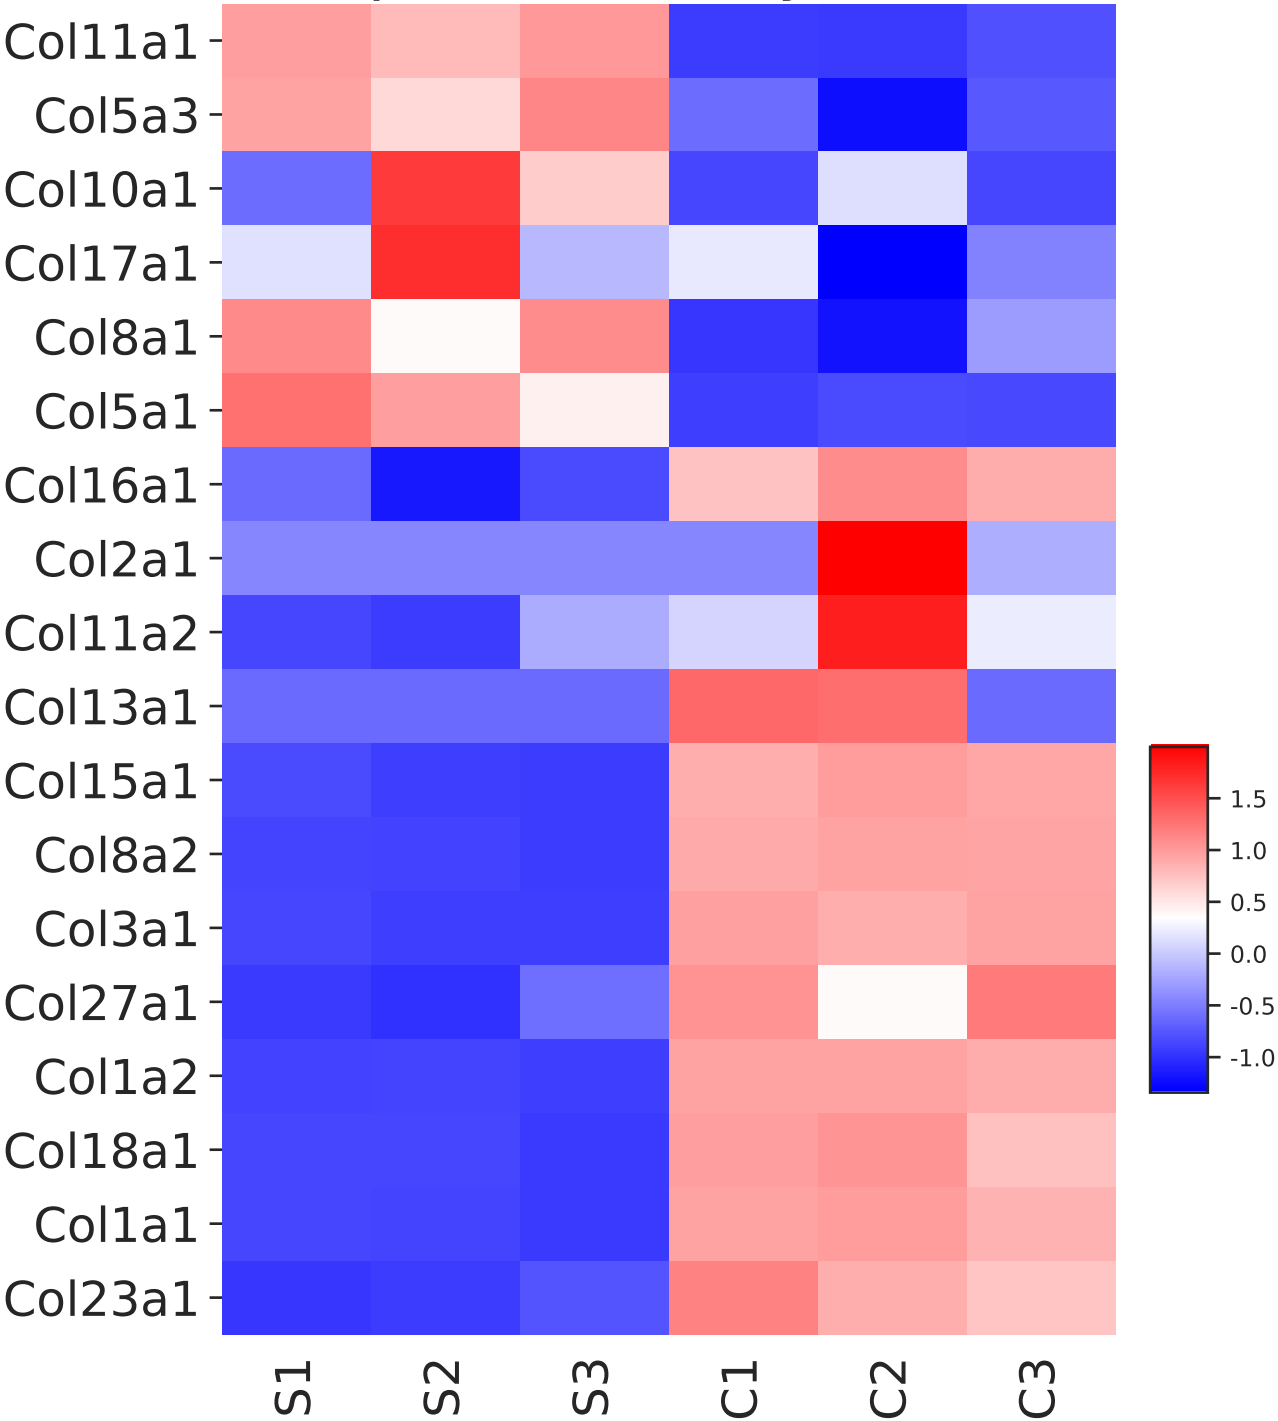

Supplement: Supplementary file 188 [file 777_Collagen chain trimerization(R-RNO-8948216).heatmap.pdf › Source data/1.RNA-Seq source data/1.BMSCs/result/1.6.GSEA/S-vs-C/rct/777_Collagen chain trimerization(R-RNO-8948216).heatmap.pdf]

# Extracellular matrix organization(R-RNO-1474244)

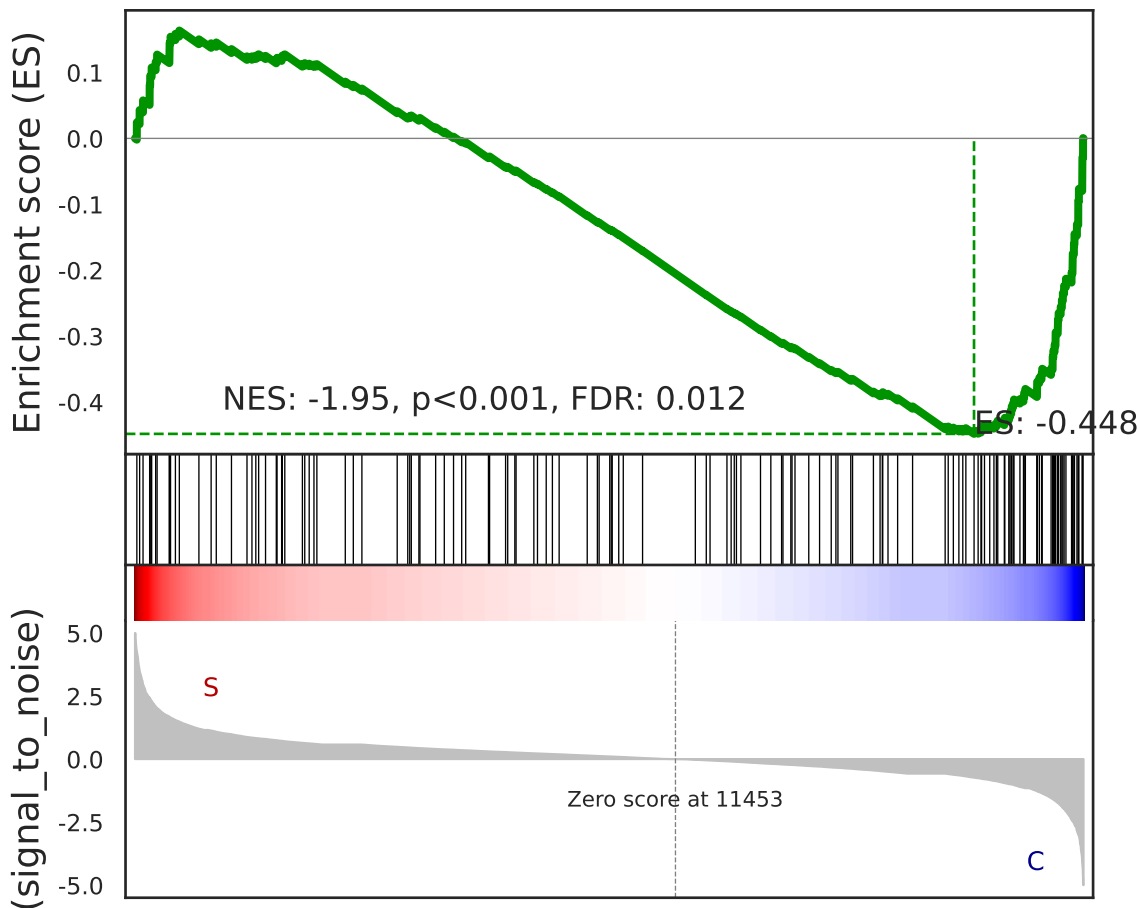

Supplement: Supplementary file 189 [file 778_Extracellular matrix organization(R-RNO-1474244).gsea.pdf › Source data/1.RNA-Seq source data/1.BMSCs/result/1.6.GSEA/S-vs-C/rct/778_Extracellular matrix organization(R-RNO-1474244).gsea.pdf]

Extracellular matrix organization(R-RNO-1474244)  
Heatmap of the Analyzed GeneSet

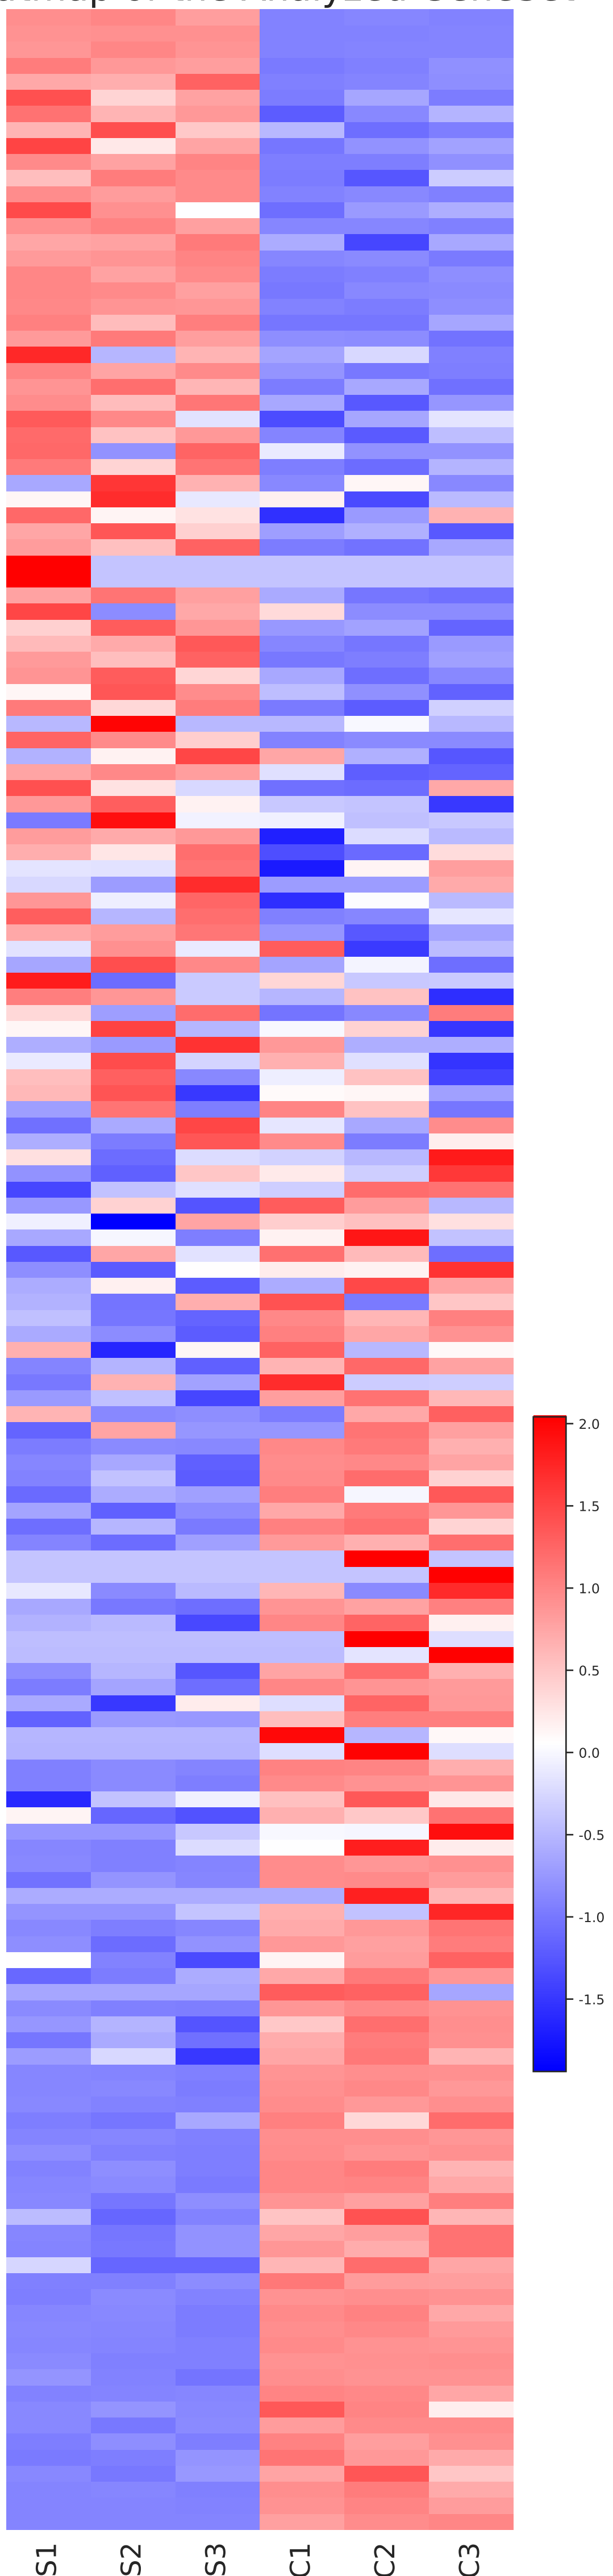

Supplement: Supplementary file 190 [file 778_Extracellular matrix organization(R-RNO-1474244).heatmap.pdf › Source data/1.RNA-Seq source data/1.BMSCs/result/1.6.GSEA/S-vs-C/rct/778_Extracellular matrix organization(R-RNO-1474244).heatmap.pdf]

# Transport of inorganic cations/anions and amino acids/oli...(R-RNO-425393)

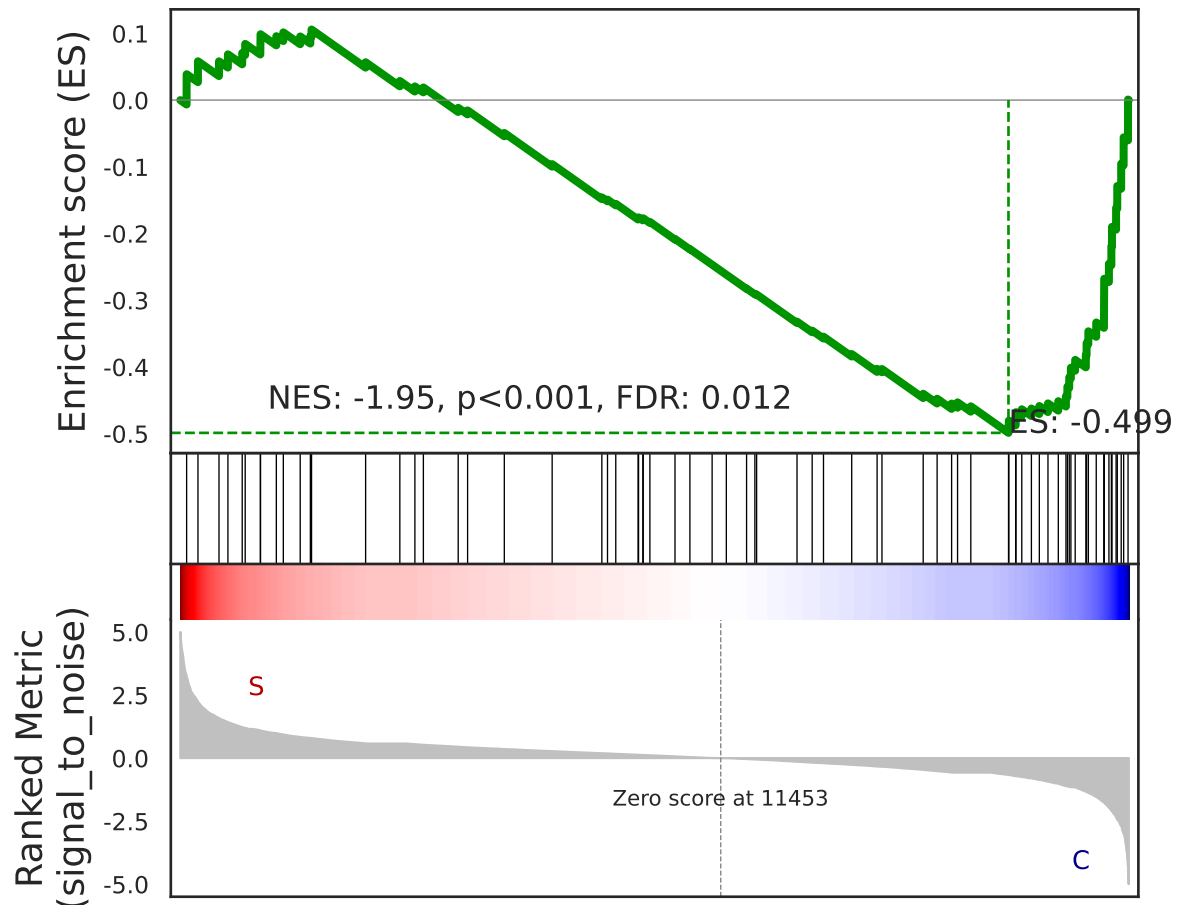

Supplement: Supplementary file 191 [file 779_Transport of inorganic cations_anions and amino acids_oli...(R-RNO-425393).gsea.pdf › Source data/1.RNA-Seq source data/1.BMSCs/result/1.6.GSEA/S-vs-C/rct/779_Transport of inorganic cations_anions and amino acids_oli...(R-RNO-425393).gsea.pdf]

# ECM proteoglycans(R-RNO-3000178)

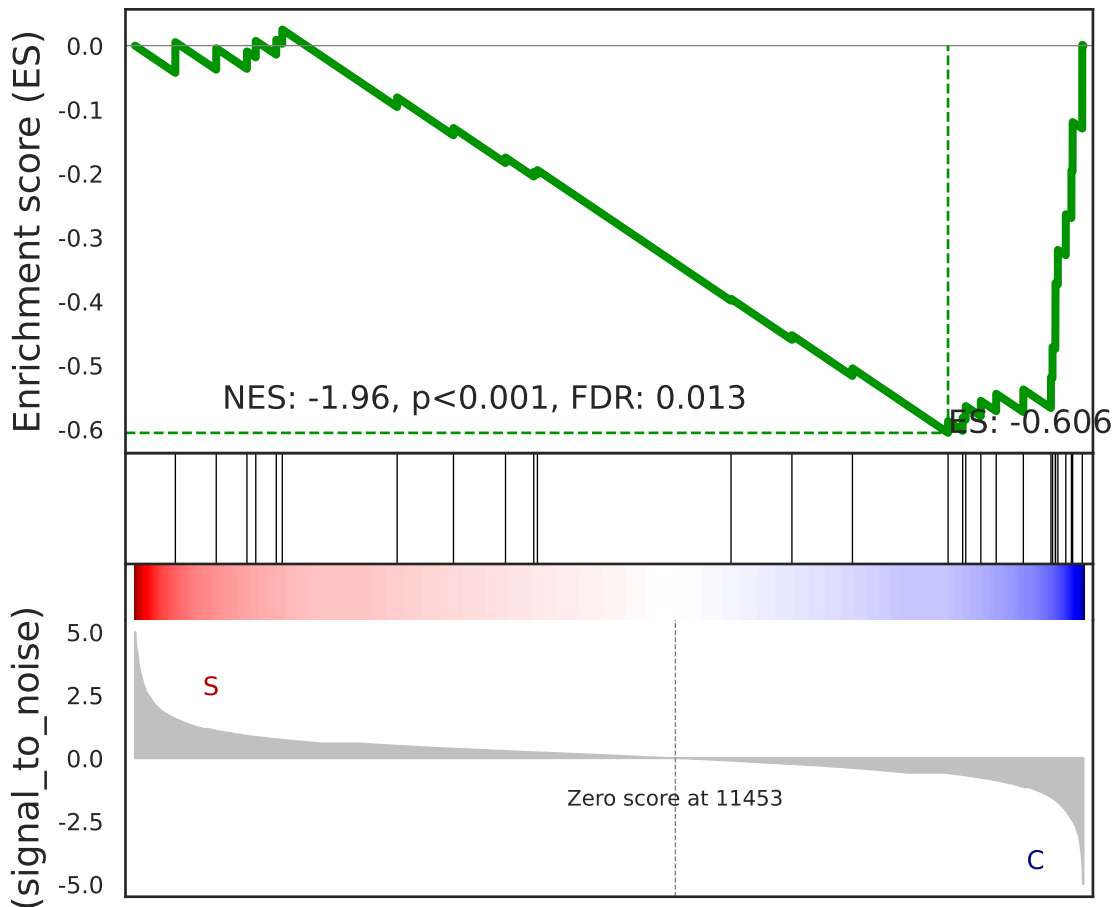

Supplement: Supplementary file 193 [file 780_ECM proteoglycans(R-RNO-3000178).gsea.pdf › Source data/1.RNA-Seq source data/1.BMSCs/result/1.6.GSEA/S-vs-C/rct/780_ECM proteoglycans(R-RNO-3000178).gsea.pdf]

ECM proteoglycans(R-RNO-3000178)  
Heatmap of the Analyzed GeneSet

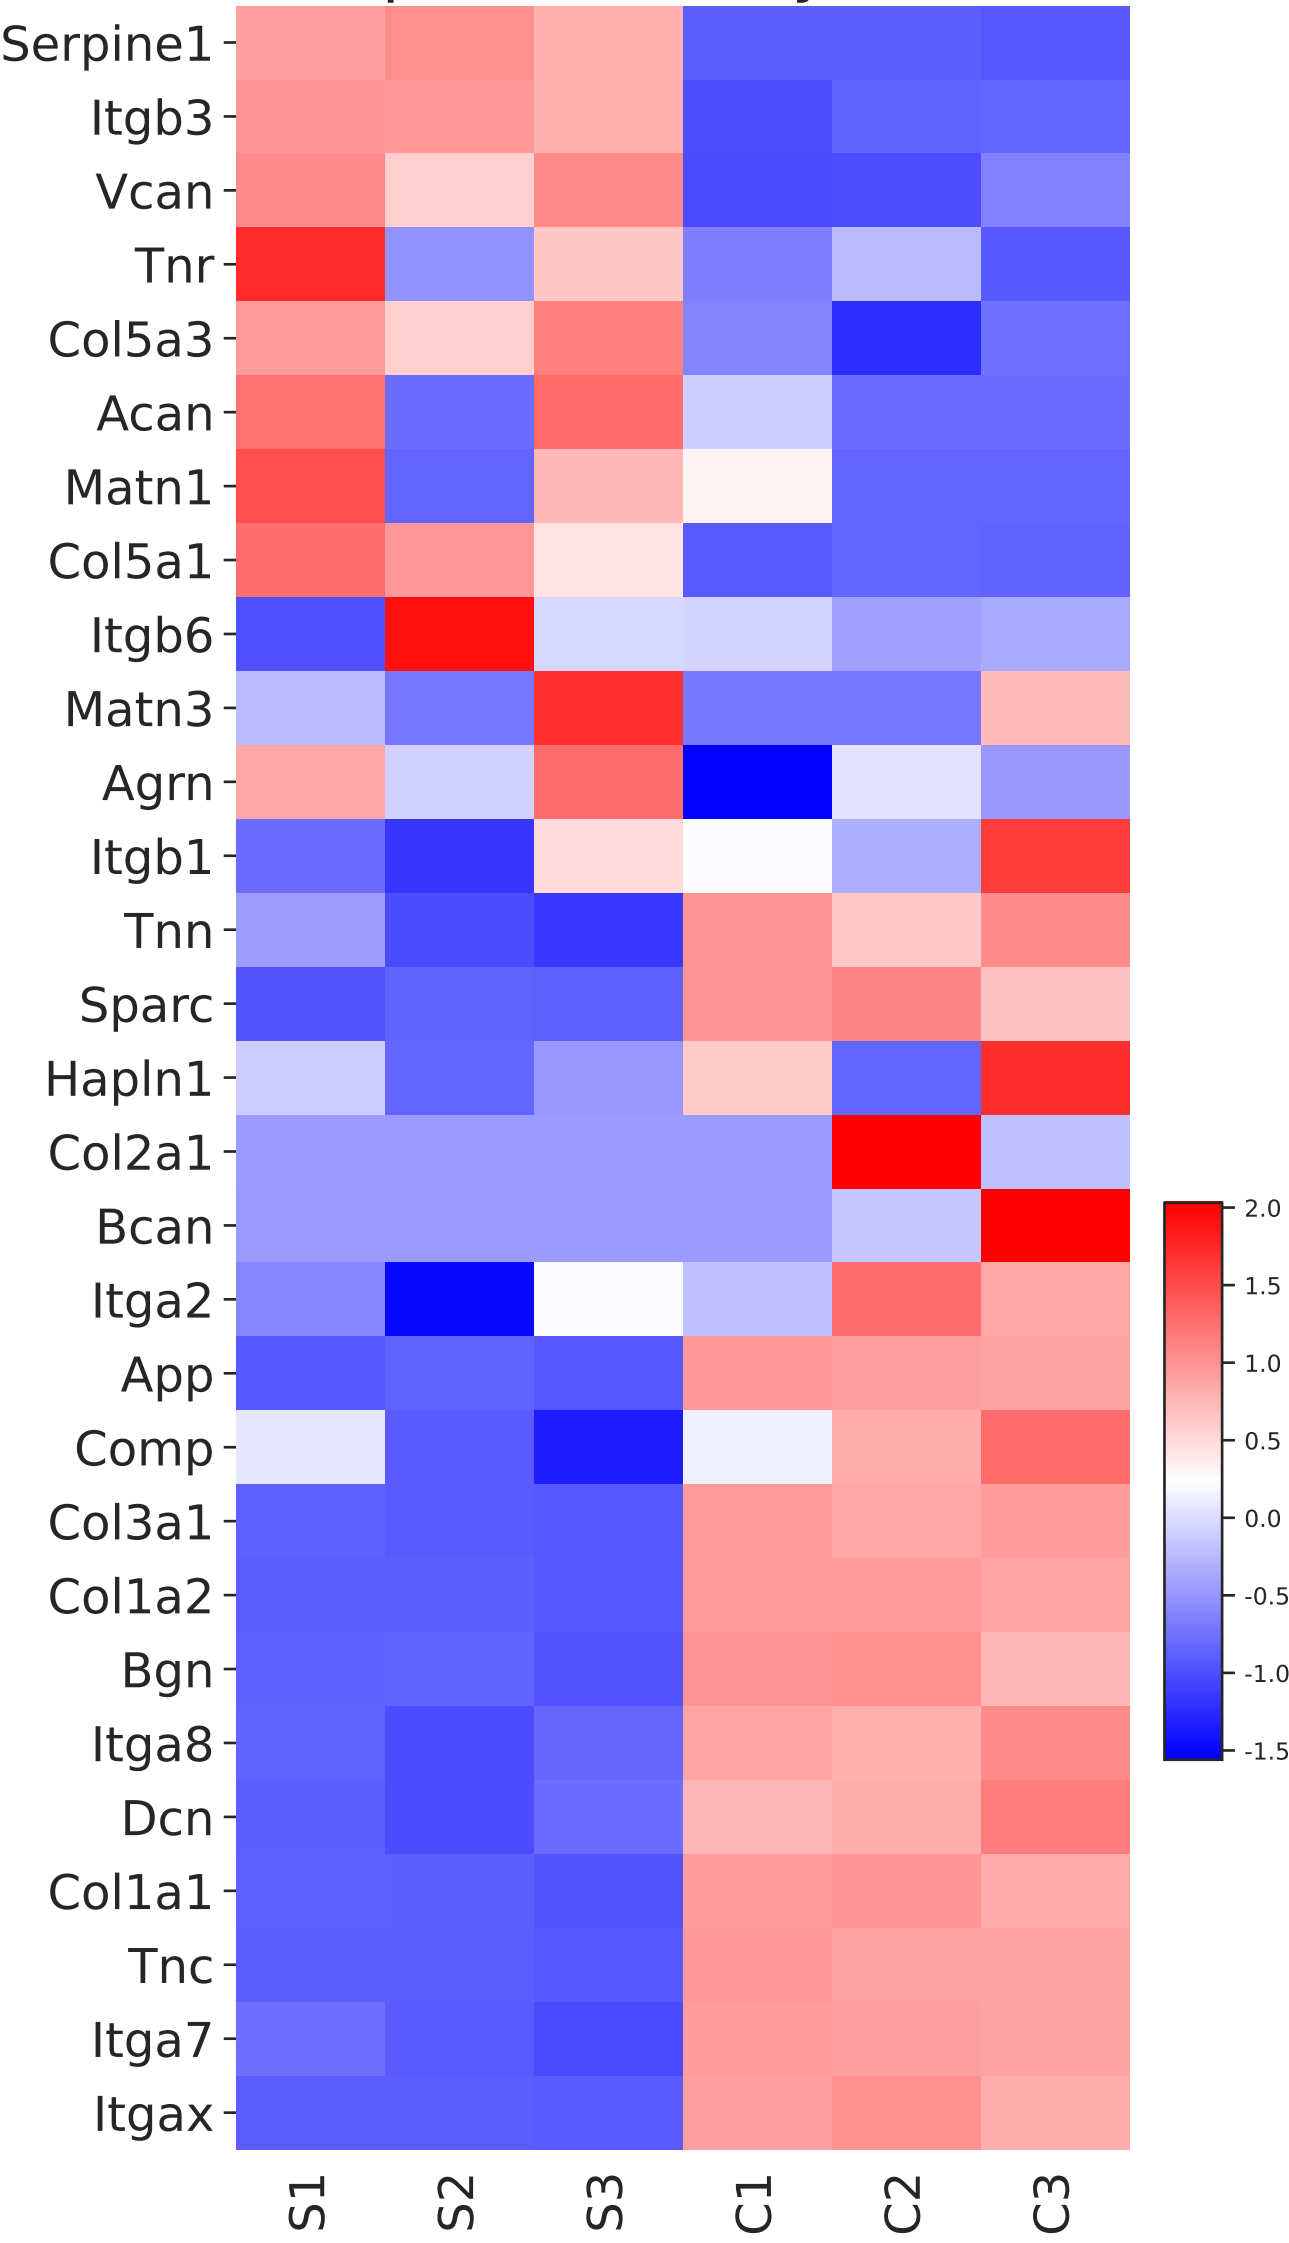

Supplement: Supplementary file 194 [file 780_ECM proteoglycans(R-RNO-3000178).heatmap.pdf › Source data/1.RNA-Seq source data/1.BMSCs/result/1.6.GSEA/S-vs-C/rct/780_ECM proteoglycans(R-RNO-3000178).heatmap.pdf]

Immunoregulatory interactions between a Lymphoid and a no...(R-RNO-198933)

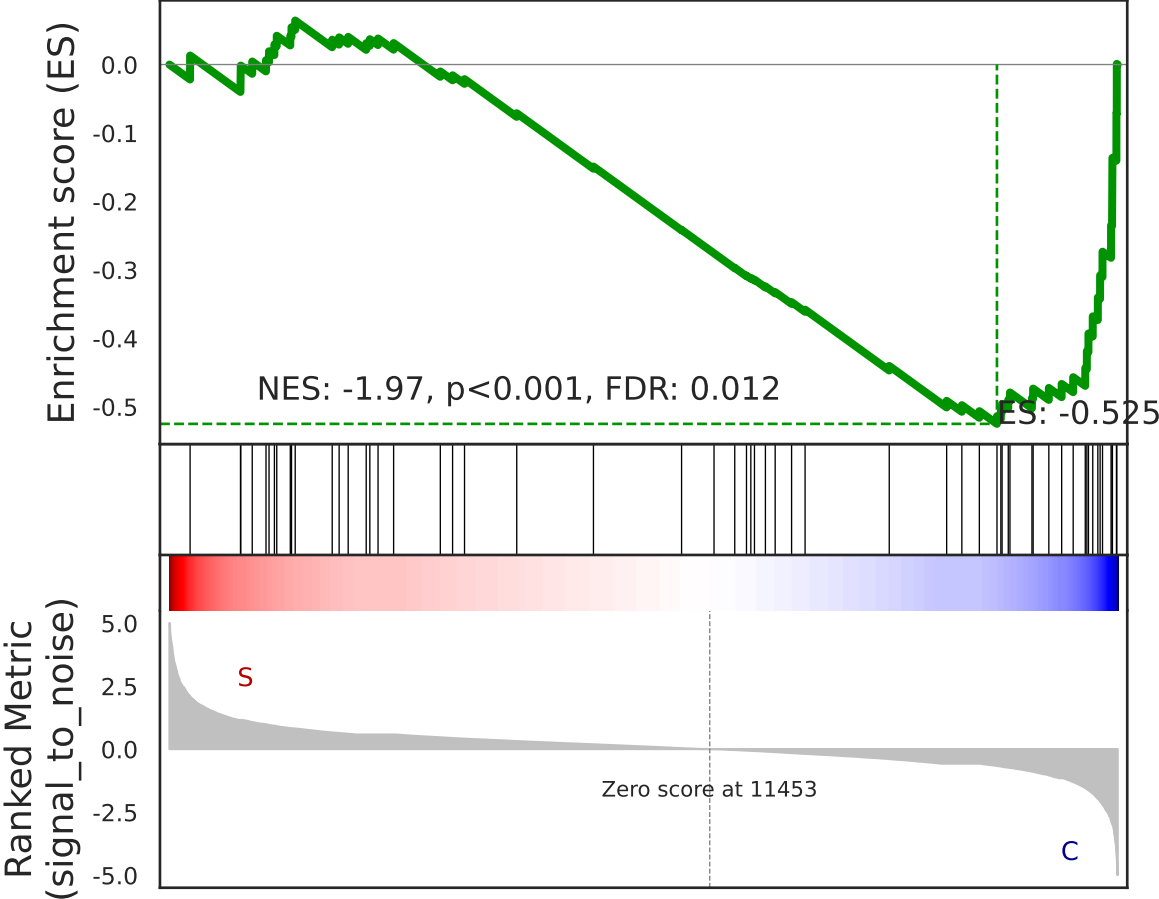

Supplement: Supplementary file 195 [file 781_Immunoregulatory interactions between a Lymphoid and a no...(R-RNO-198933).gsea.pdf › Source data/1.RNA-Seq source data/1.BMSCs/result/1.6.GSEA/S-vs-C/rct/781_Immunoregulatory interactions between a Lymphoid and a no...(R-RNO-198933).gsea.pdf]

Heatmap of the Analyzed GeneSet

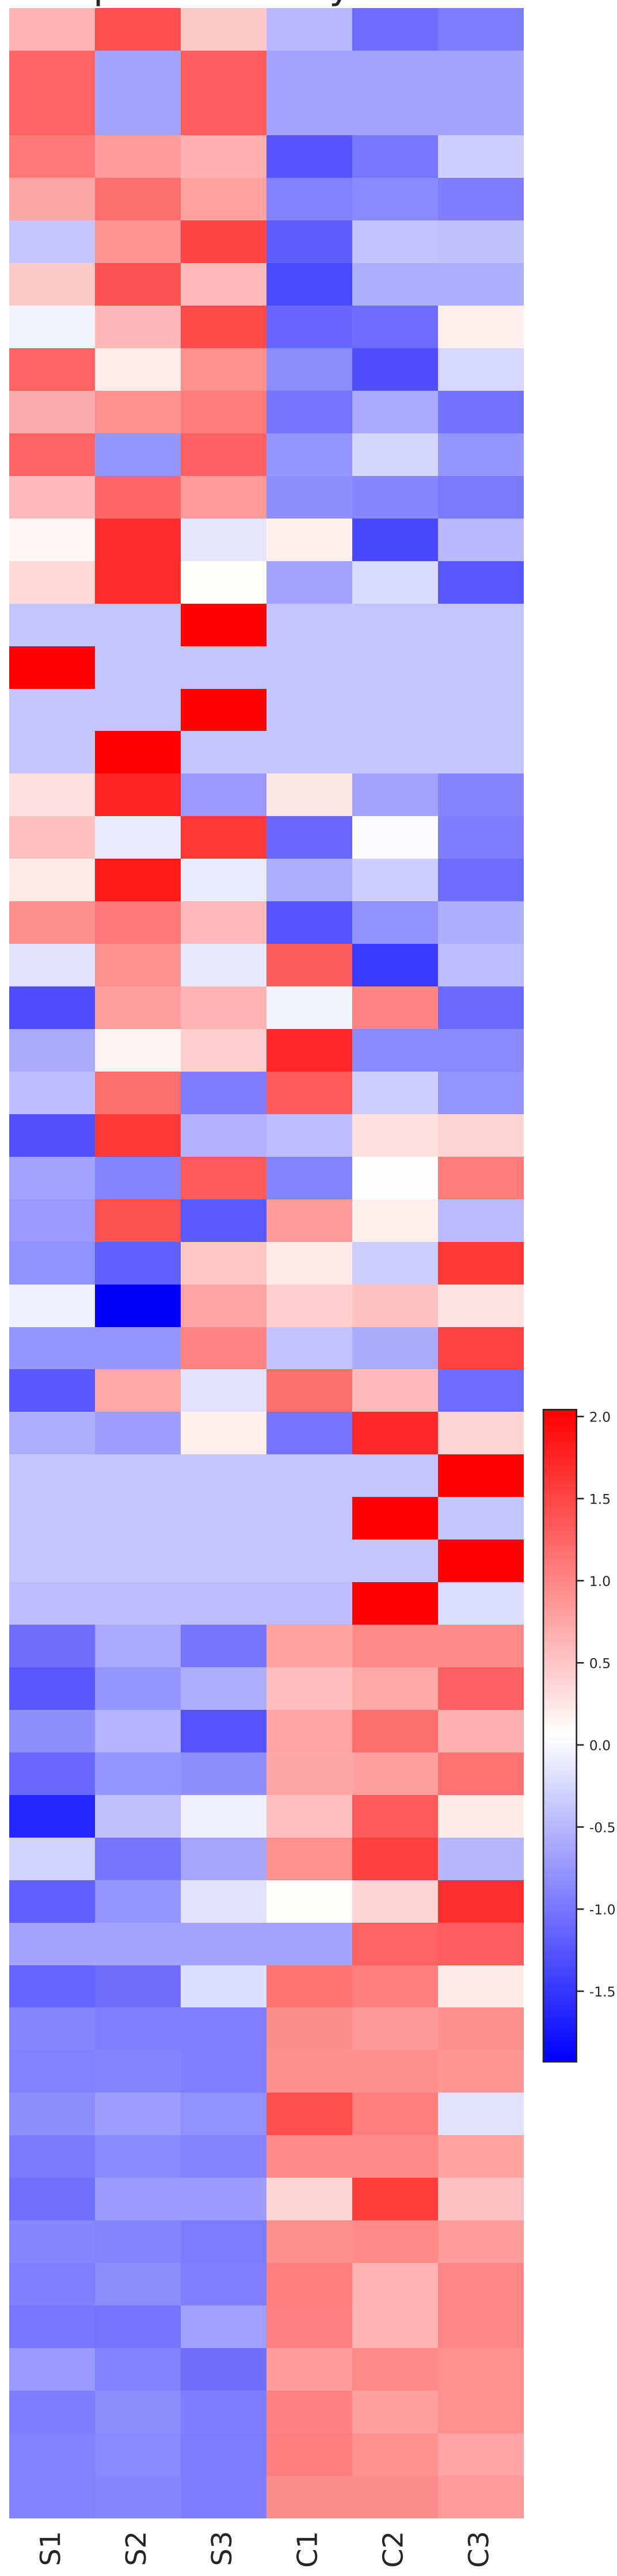

Supplement: Supplementary file 196 [file 781_Immunoregulatory interactions between a Lymphoid and a no...(R-RNO-198933).heatmap.pdf › Source data/1.RNA-Seq source data/1.BMSCs/result/1.6.GSEA/S-vs-C/rct/781_Immunoregulatory interactions between a Lymphoid and a no...(R-RNO-198933).heatmap.pdf]

# Amino acid transport across the plasma membrane(R-RNO-352230)

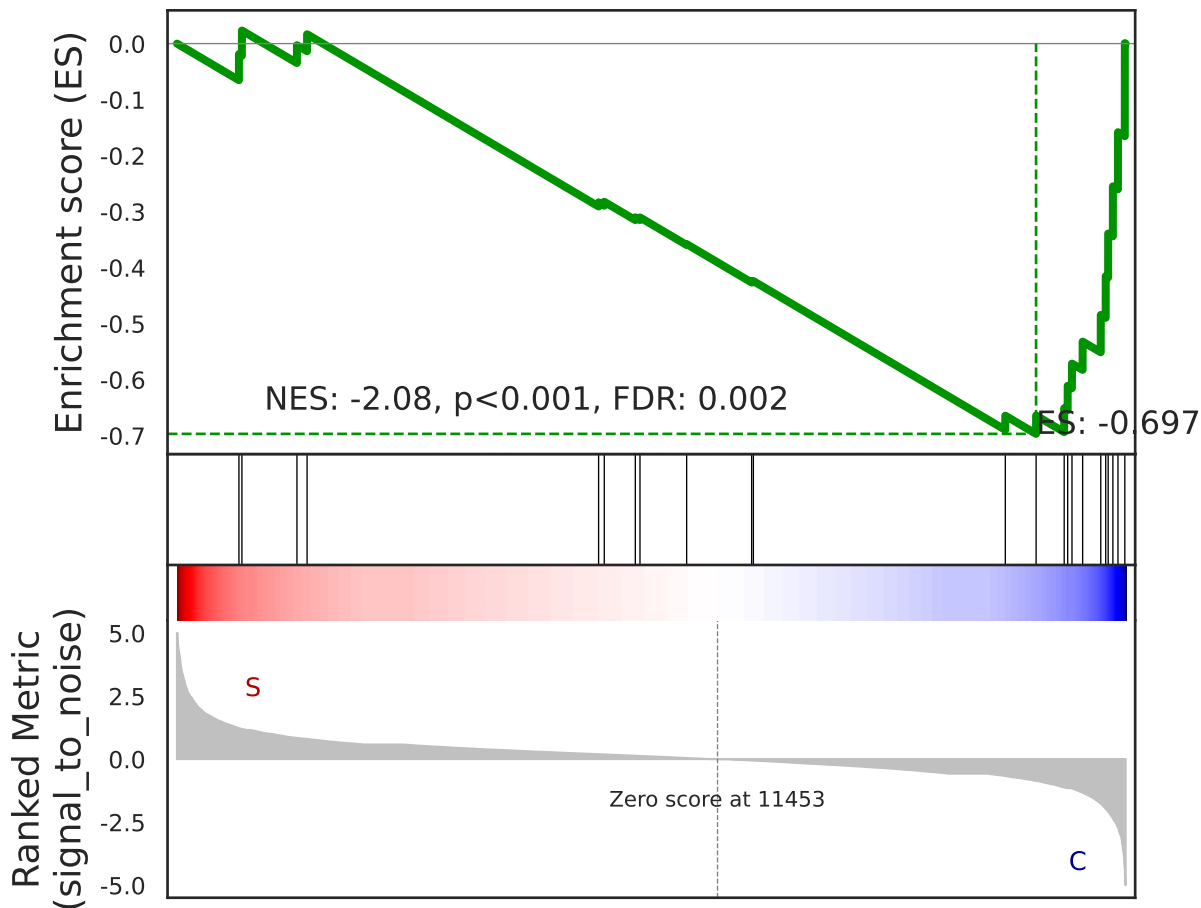

Supplement: Supplementary file 197 [file 782_Amino acid transport across the plasma membrane(R-RNO-352230).gsea.pdf › Source data/1.RNA-Seq source data/1.BMSCs/result/1.6.GSEA/S-vs-C/rct/782_Amino acid transport across the plasma membrane(R-RNO-352230).gsea.pdf]

# Amino acid transport across the plasma membrane(R-RNO-352230)

## Heatmap of the Analyzed GeneSet

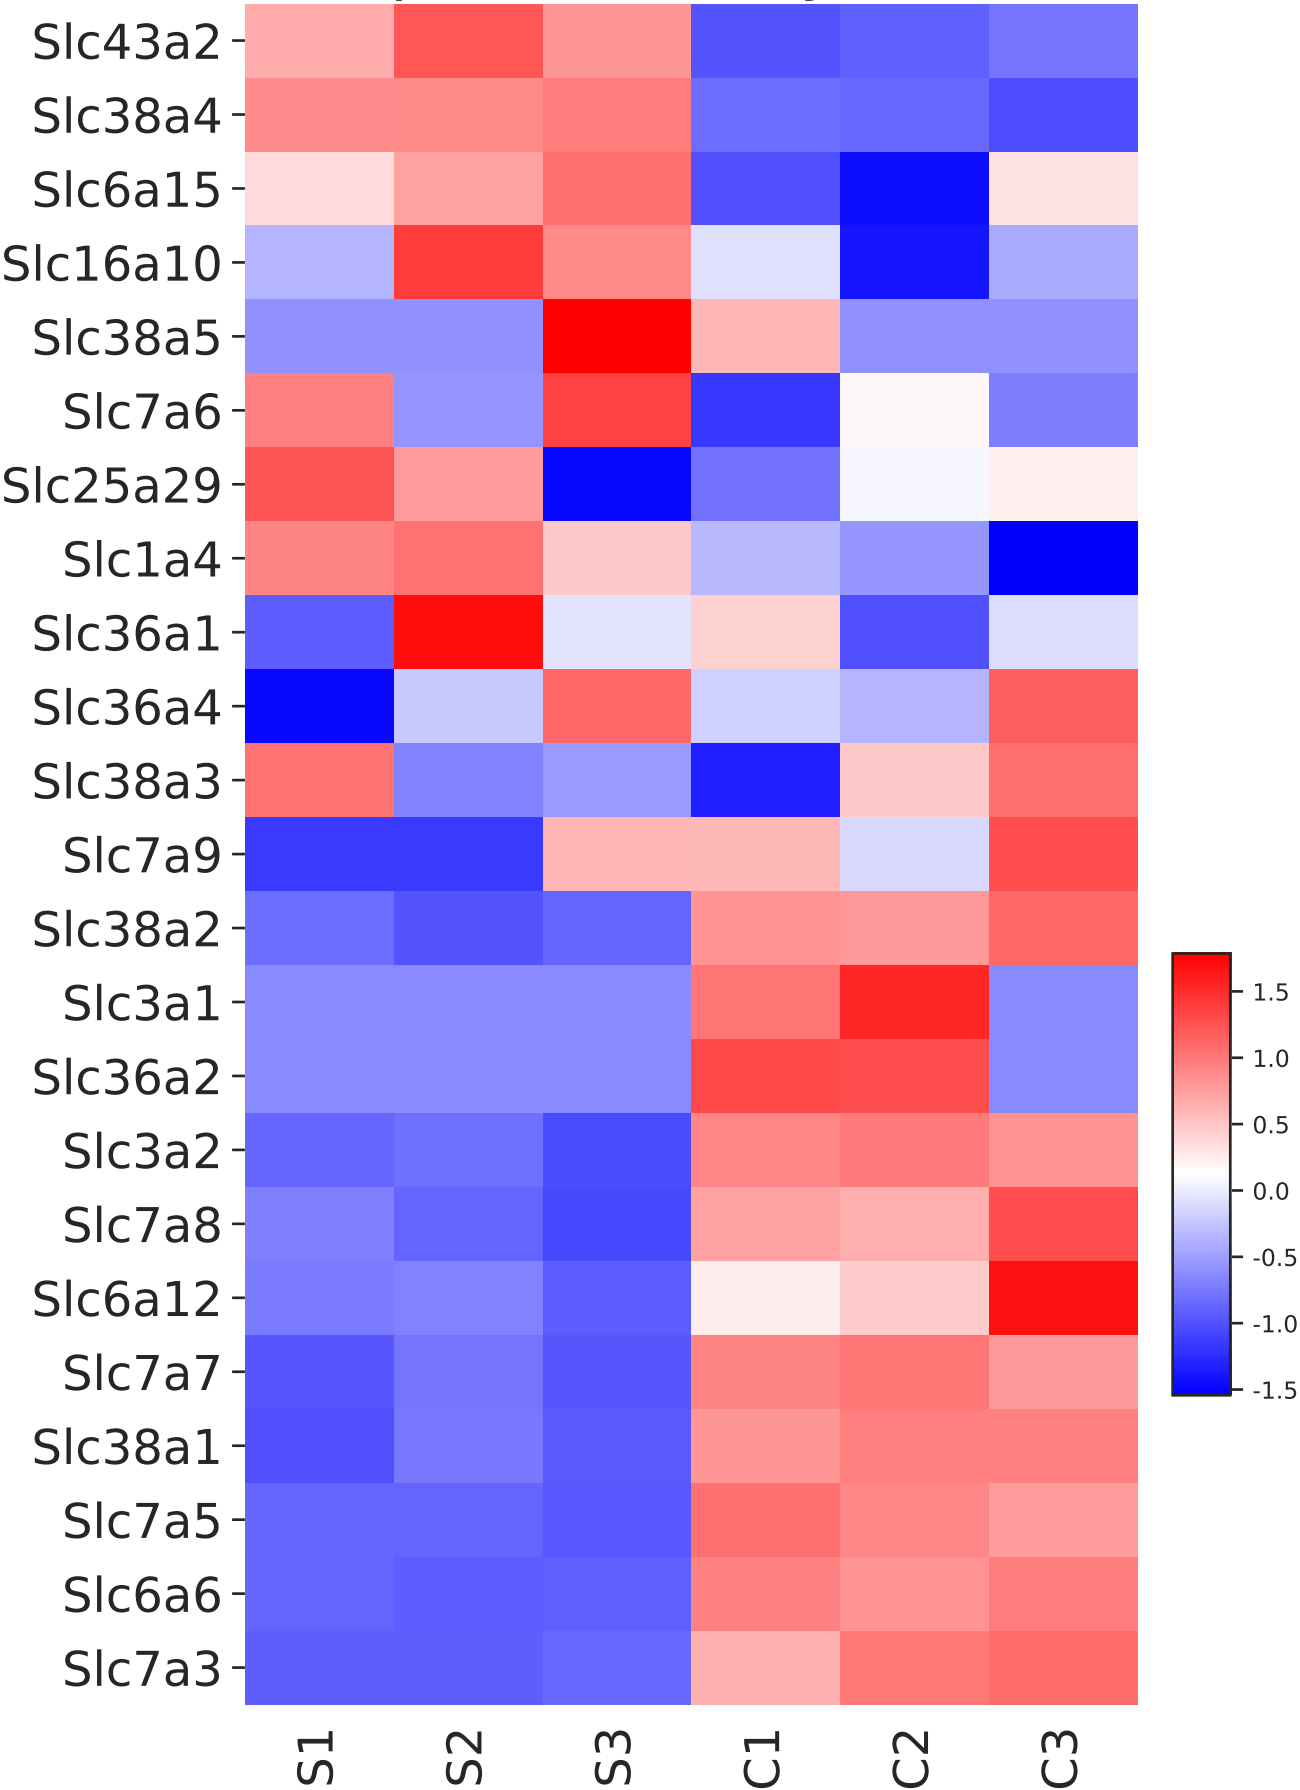

Supplement: Supplementary file 198 [file 782_Amino acid transport across the plasma membrane(R-RNO-352230).heatmap.pdf › Source data/1.RNA-Seq source data/1.BMSCs/result/1.6.GSEA/S-vs-C/rct/782_Amino acid transport across the plasma membrane(R-RNO-352230).heatmap.pdf]

# Activation of Matrix Metalloproteinases(R-RNO-1592389)

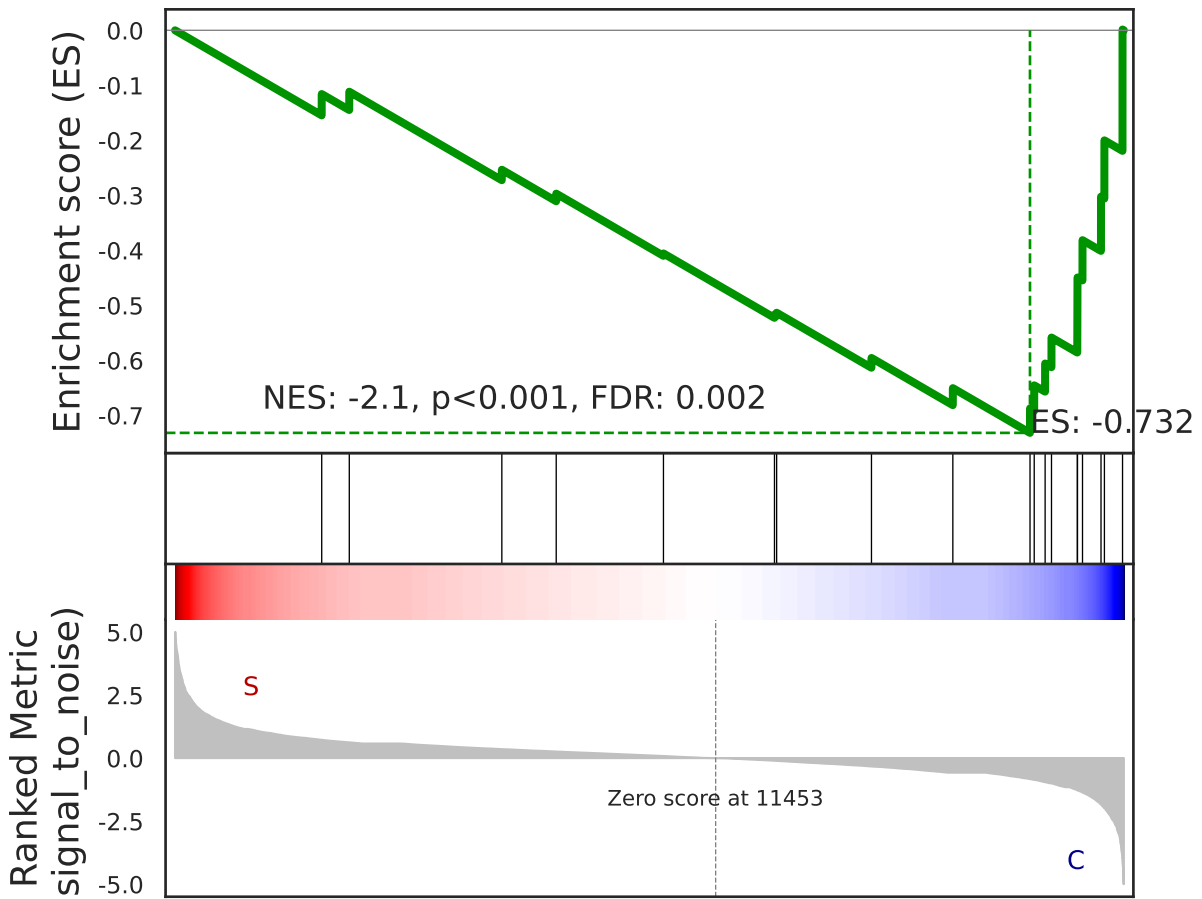

Supplement: Supplementary file 199 [file 783_Activation of Matrix Metalloproteinases(R-RNO-1592389).gsea.pdf › Source data/1.RNA-Seq source data/1.BMSCs/result/1.6.GSEA/S-vs-C/rct/783_Activation of Matrix Metalloproteinases(R-RNO-1592389).gsea.pdf]

# Activation of Matrix Metalloproteinases(R-RNO-1592389)

## Heatmap of the Analyzed GeneSet

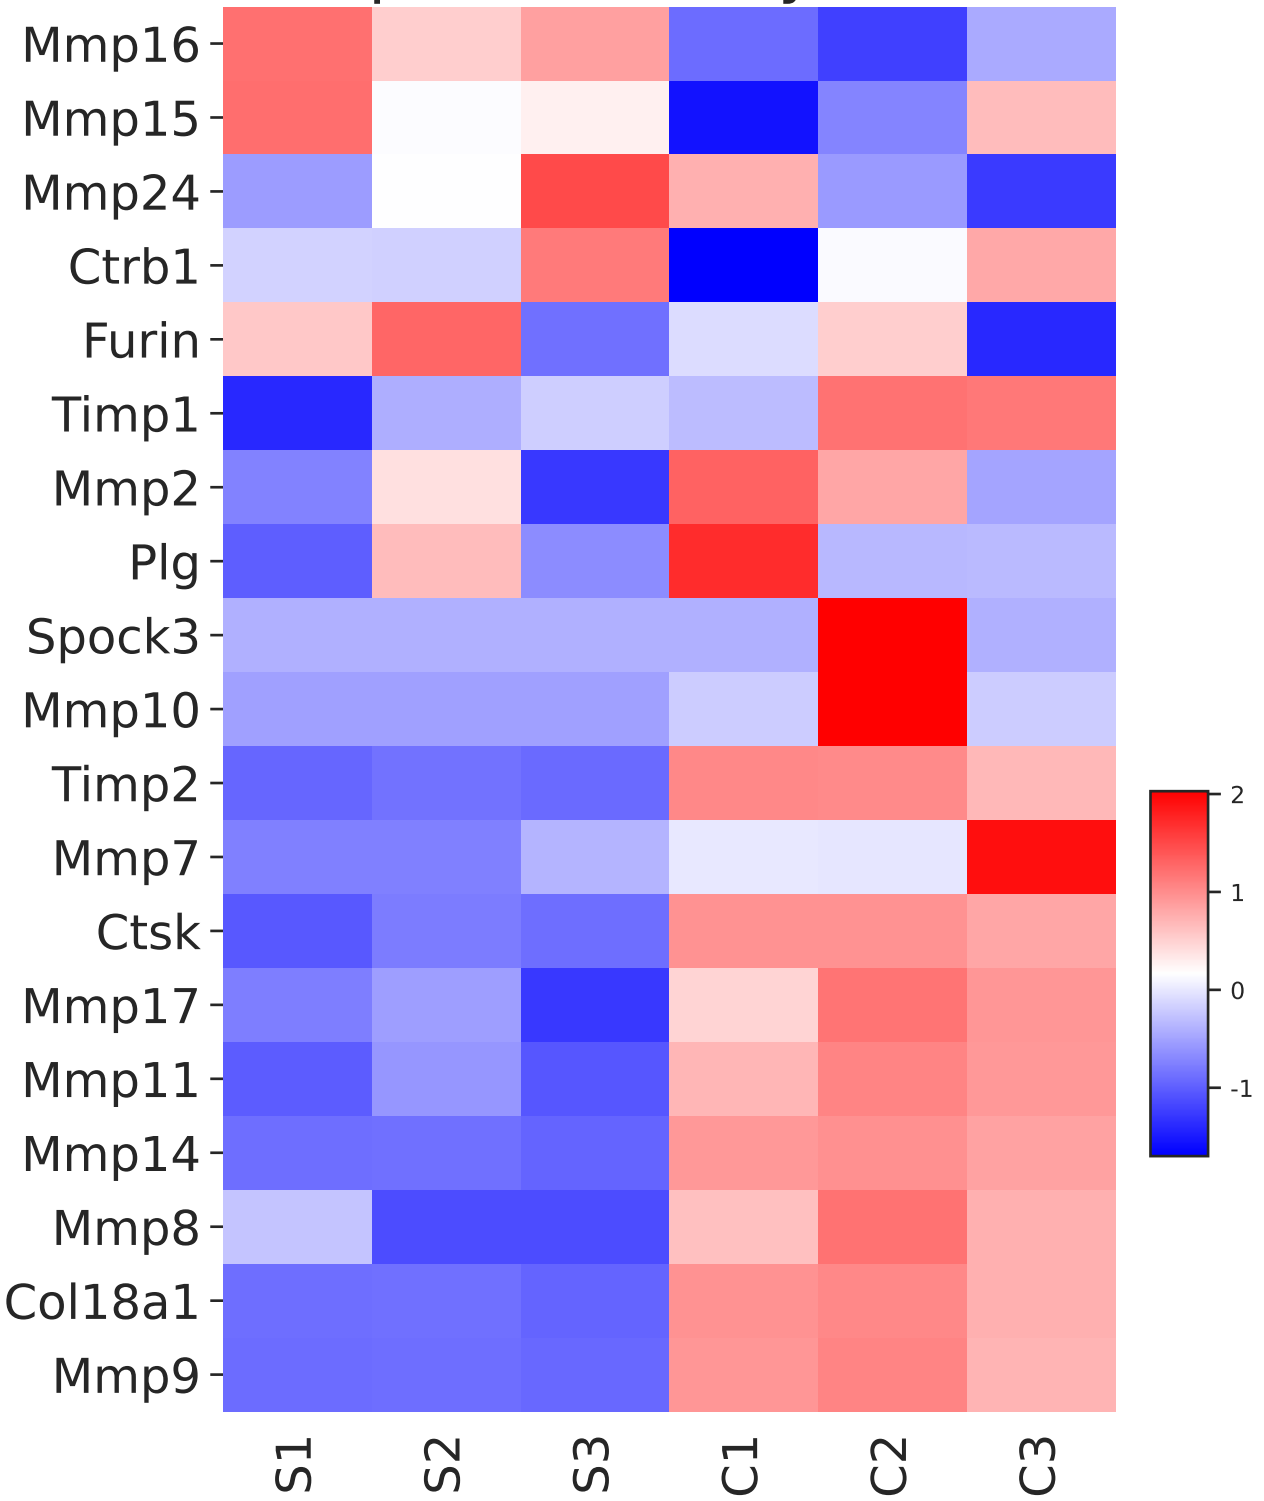

Supplement: Supplementary file 200 [file 783_Activation of Matrix Metalloproteinases(R-RNO-1592389).heatmap.pdf › Source data/1.RNA-Seq source data/1.BMSCs/result/1.6.GSEA/S-vs-C/rct/783_Activation of Matrix Metalloproteinases(R-RNO-1592389).heatmap.pdf]

# Collagen degradation(R-RNO-1442490)

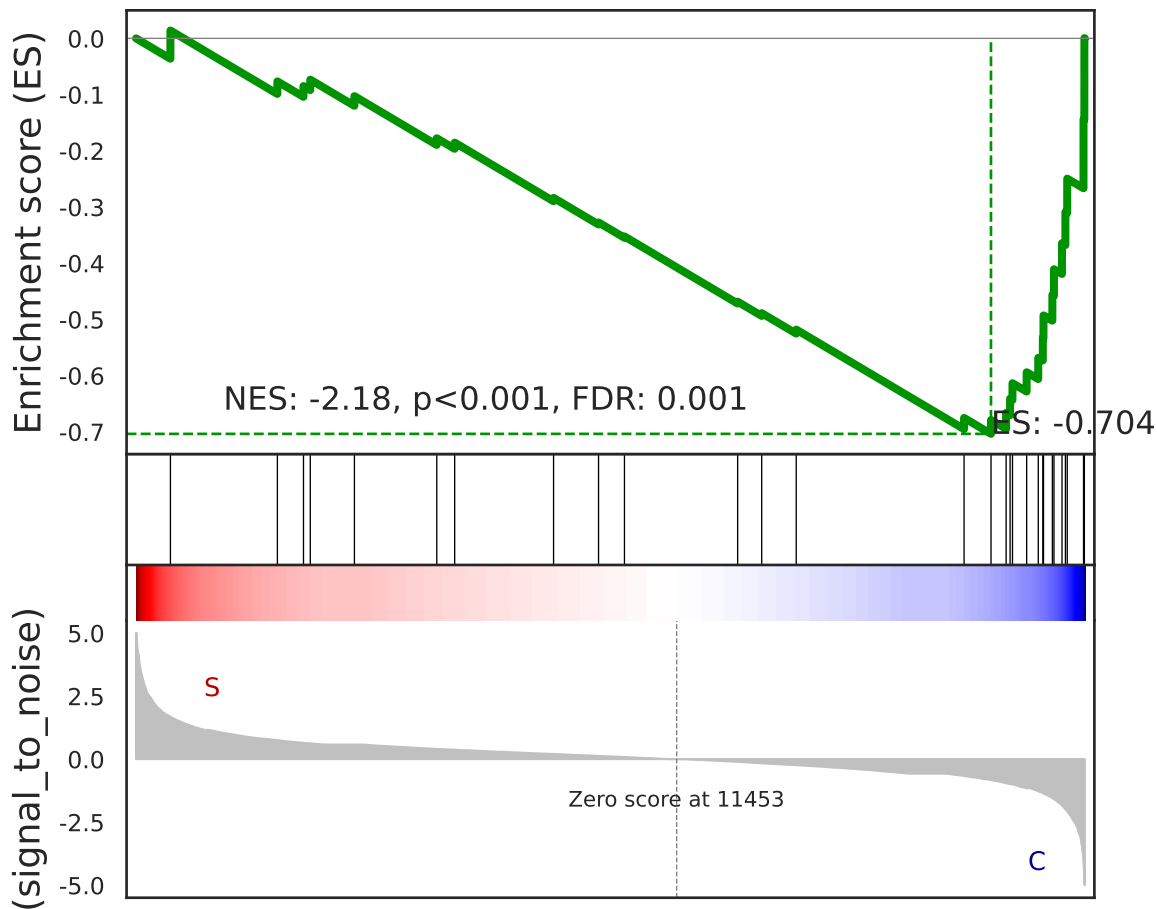

Supplement: Supplementary file 201 [file 784_Collagen degradation(R-RNO-1442490).gsea.pdf › Source data/1.RNA-Seq source data/1.BMSCs/result/1.6.GSEA/S-vs-C/rct/784_Collagen degradation(R-RNO-1442490).gsea.pdf]

# Collagen degradation(R-RNO-1442490)

## Heatmap of the Analyzed GeneSet

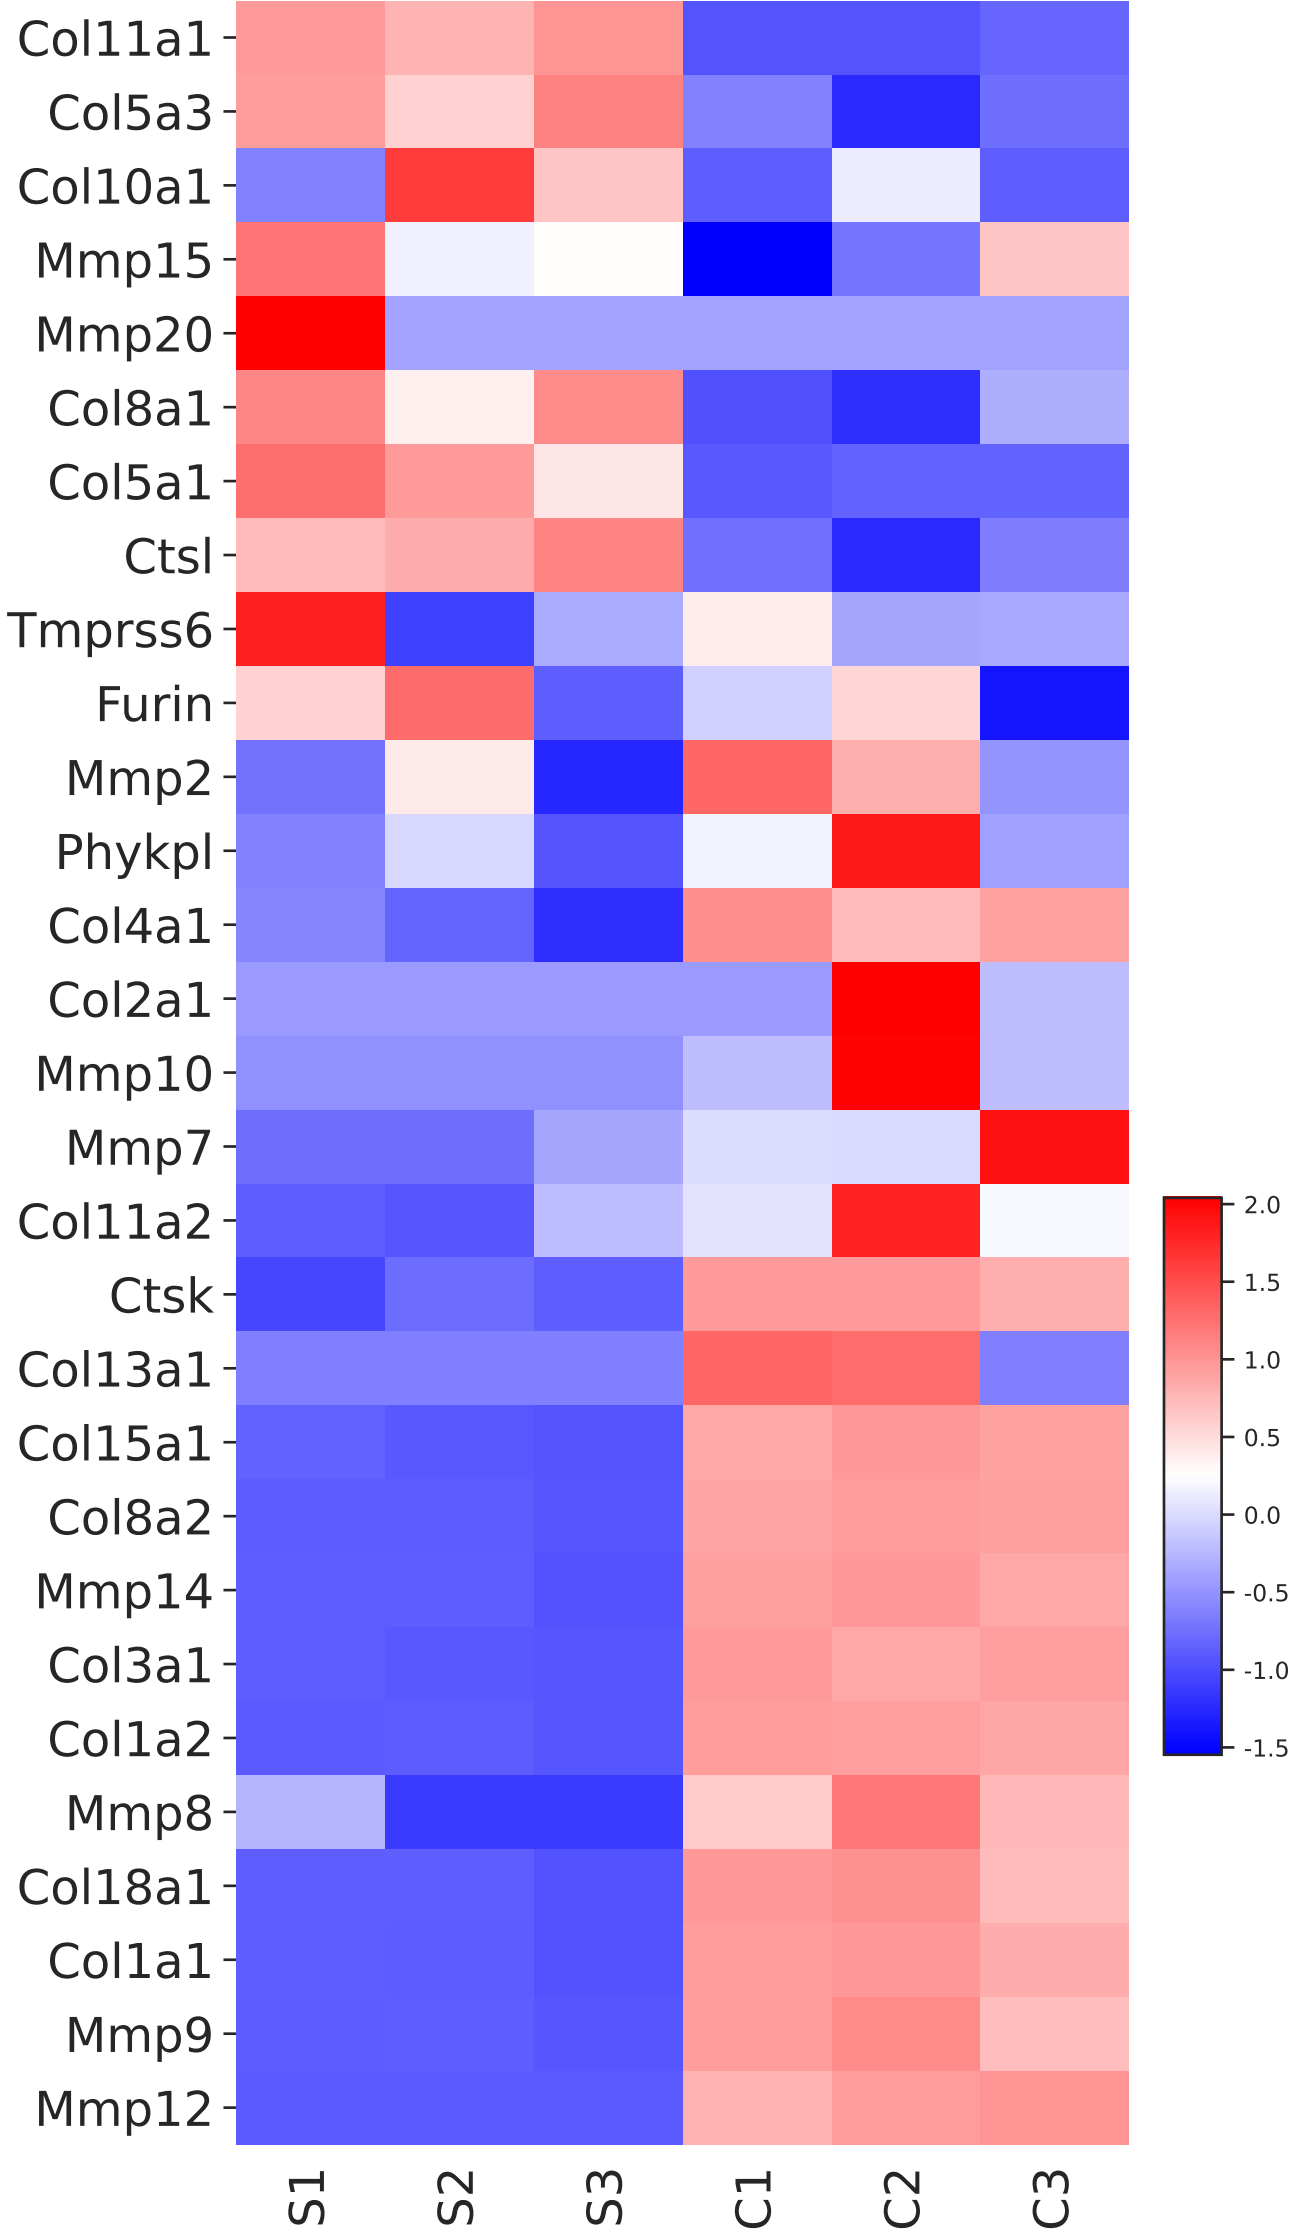

Supplement: Supplementary file 202 [file 784_Collagen degradation(R-RNO-1442490).heatmap.pdf › Source data/1.RNA-Seq source data/1.BMSCs/result/1.6.GSEA/S-vs-C/rct/784_Collagen degradation(R-RNO-1442490).heatmap.pdf]

# Chemokine receptors bind chemokines(R-RNO-380108)

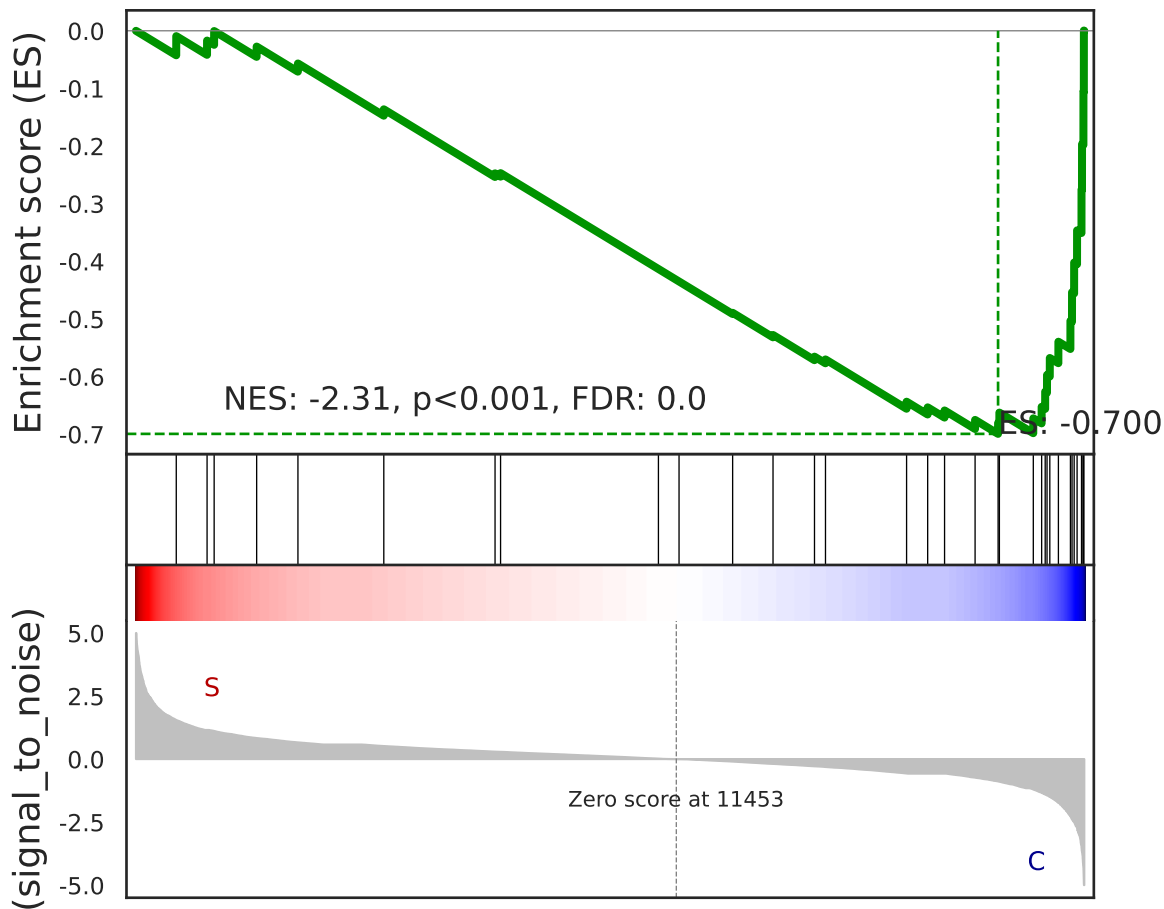

Supplement: Supplementary file 203 [file 785_Chemokine receptors bind chemokines(R-RNO-380108).gsea.pdf › Source data/1.RNA-Seq source data/1.BMSCs/result/1.6.GSEA/S-vs-C/rct/785_Chemokine receptors bind chemokines(R-RNO-380108).gsea.pdf]

Chemokine receptors bind chemokines(R-RNO-380108)

Heatmap of the Analyzed GeneSet

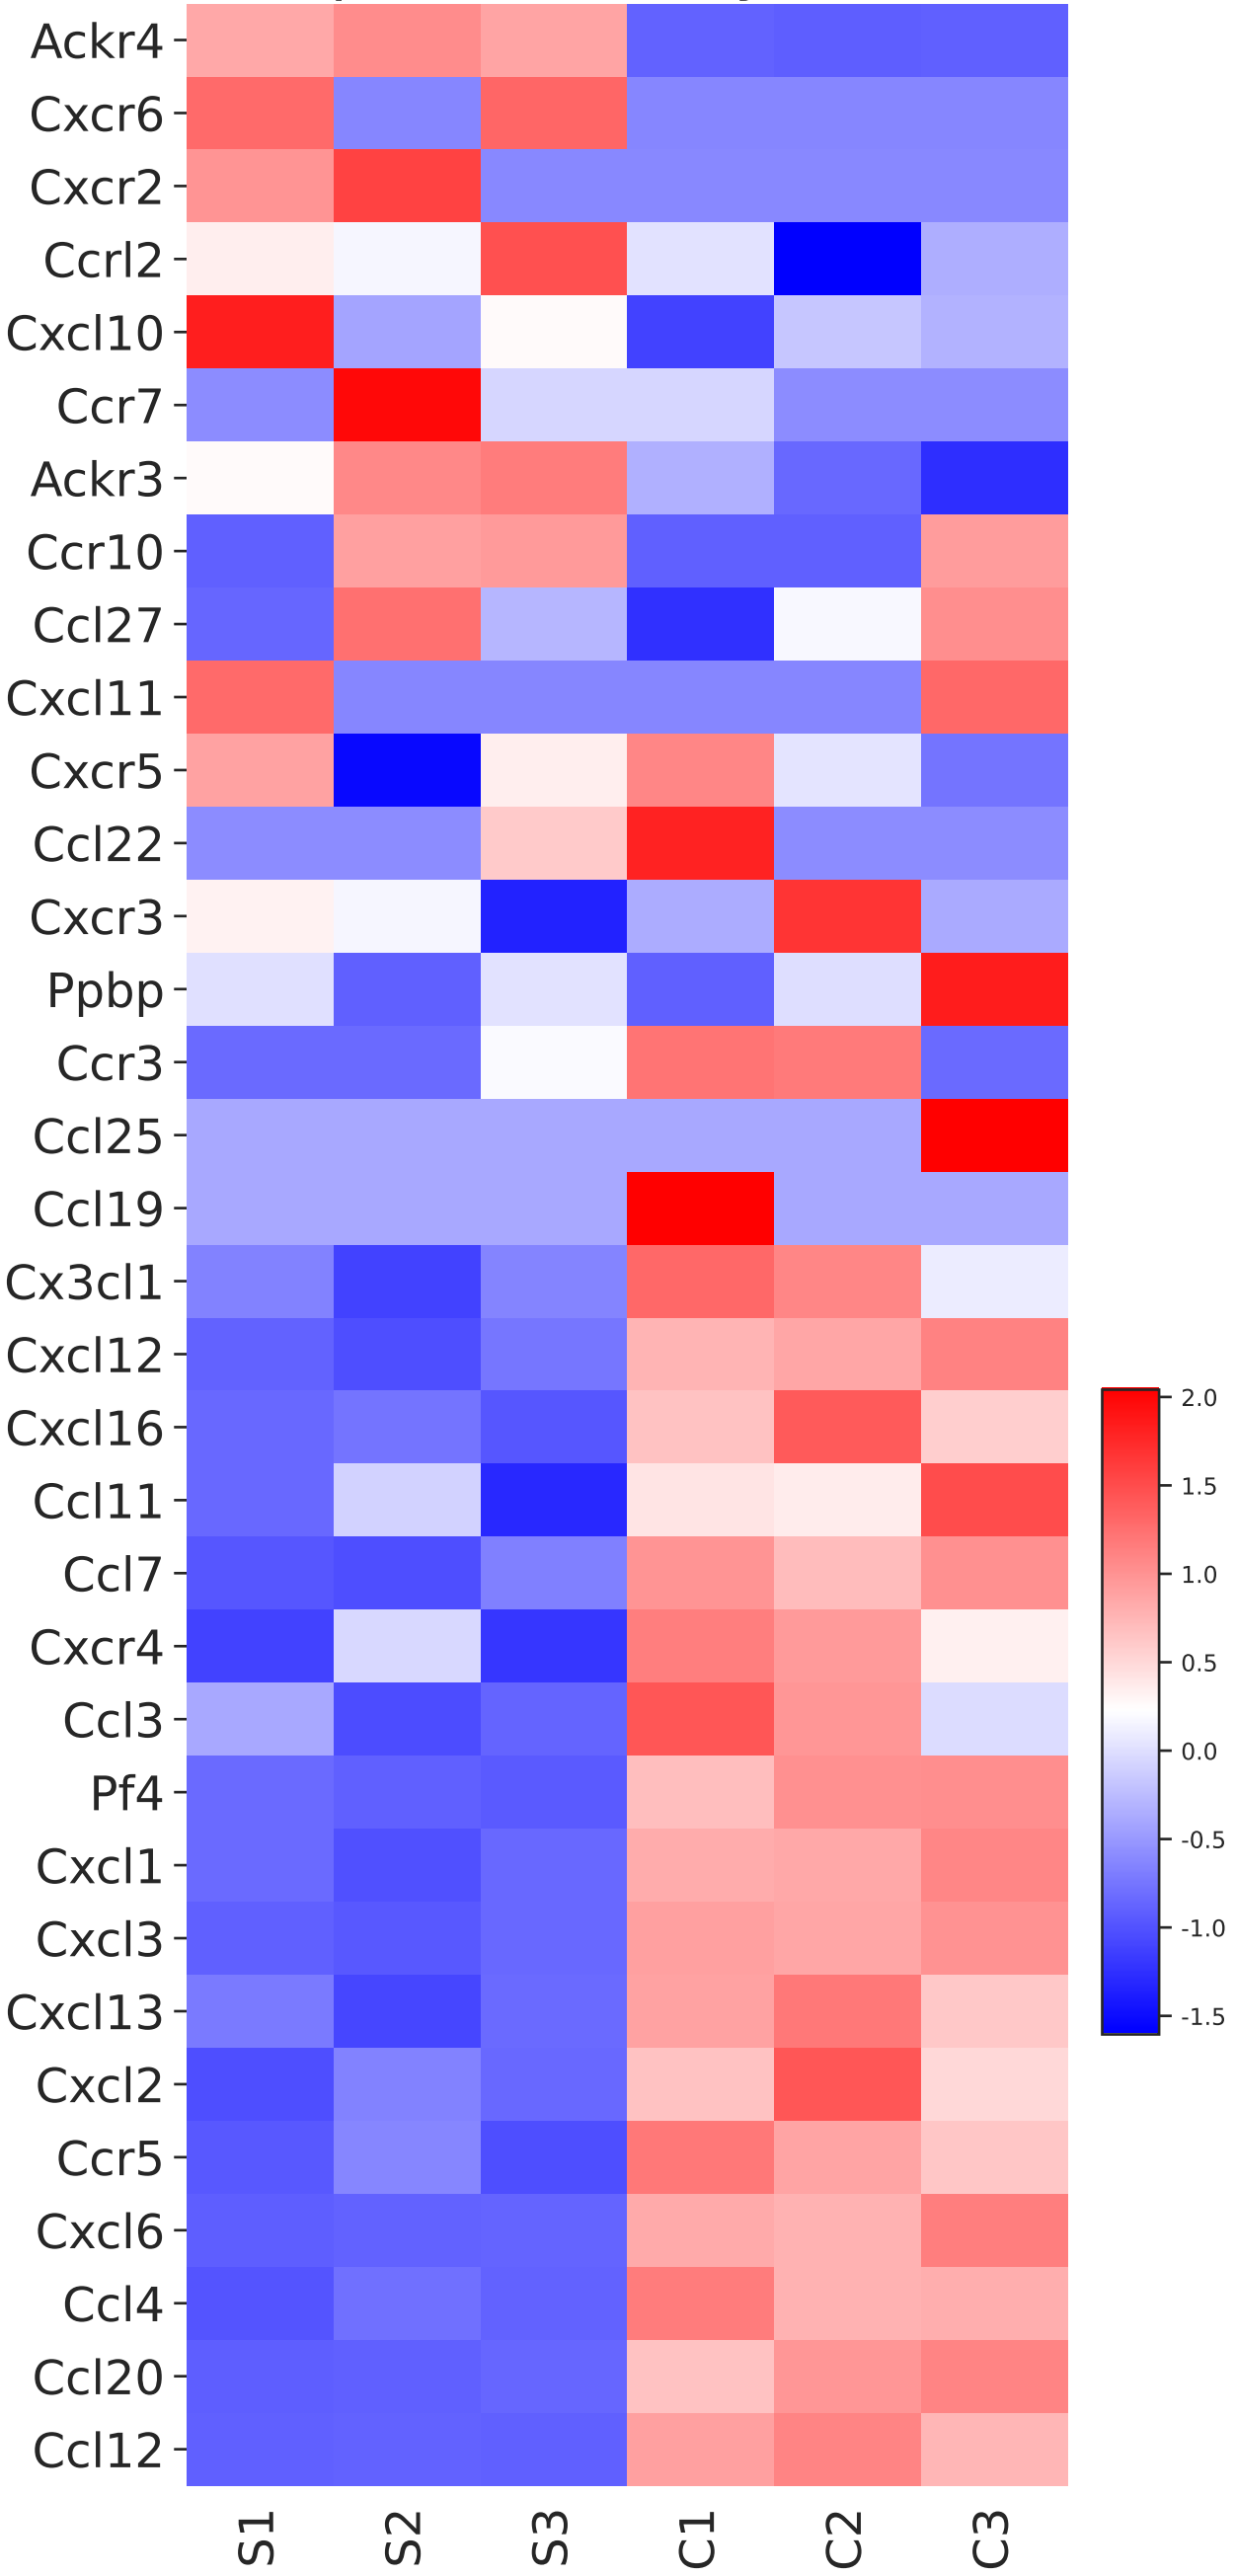

Supplement: Supplementary file 204 [file 785_Chemokine receptors bind chemokines(R-RNO-380108).heatmap.pdf › Source data/1.RNA-Seq source data/1.BMSCs/result/1.6.GSEA/S-vs-C/rct/785_Chemokine receptors bind chemokines(R-RNO-380108).heatmap.pdf]

# Cholesterol biosynthesis(R-RNO-191273)

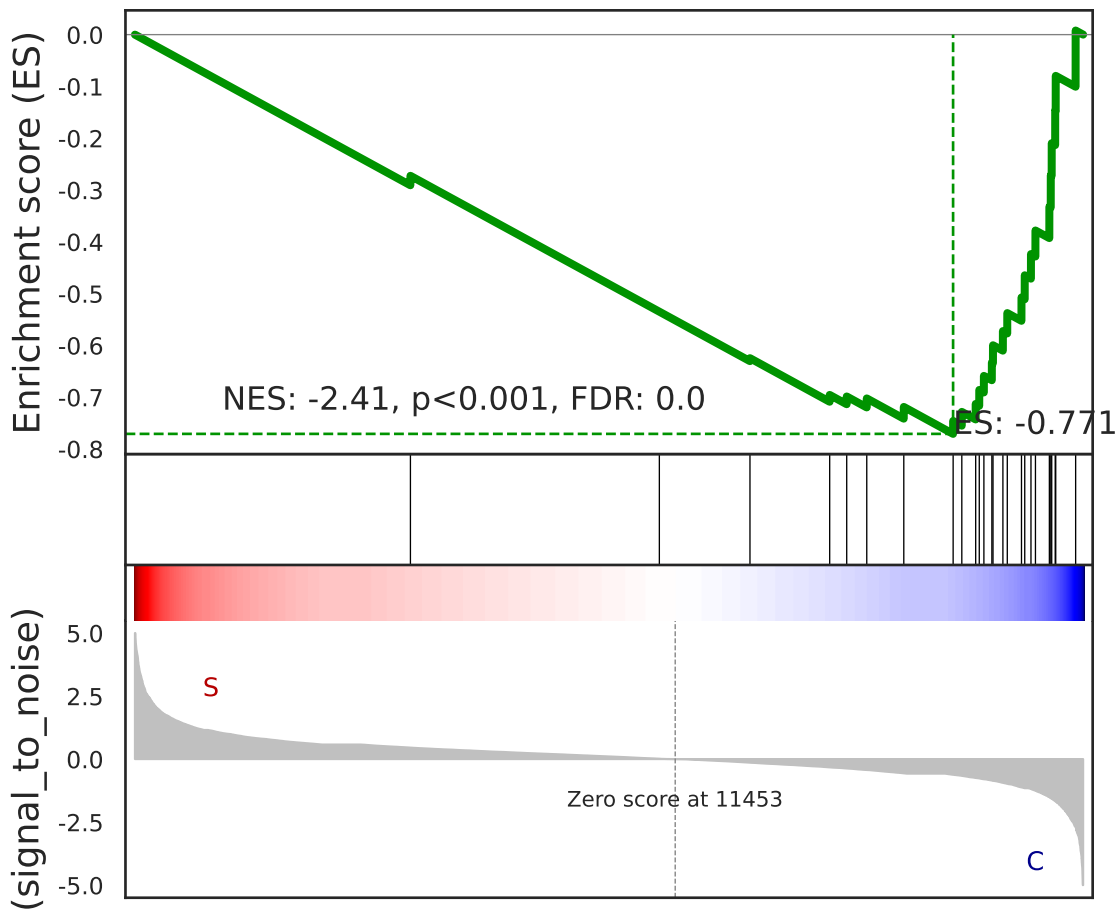

Supplement: Supplementary file 205 [file 786_Cholesterol biosynthesis(R-RNO-191273).gsea.pdf › Source data/1.RNA-Seq source data/1.BMSCs/result/1.6.GSEA/S-vs-C/rct/786_Cholesterol biosynthesis(R-RNO-191273).gsea.pdf]
