# Supplementary figures and images for: Peptide-based Self-adaptive Implant Coating Sequentially Regulates Bone Regeneration to Enhance Interfacial Osseointegration (part 3 of 6)
Source: Research Square preprint supplement (doi:10.21203/rs.3.rs-5132912/v1), 2024-10-01

Cholesterol biosynthesis(R-RNO-191273)  
Heatmap of the Analyzed GeneSet

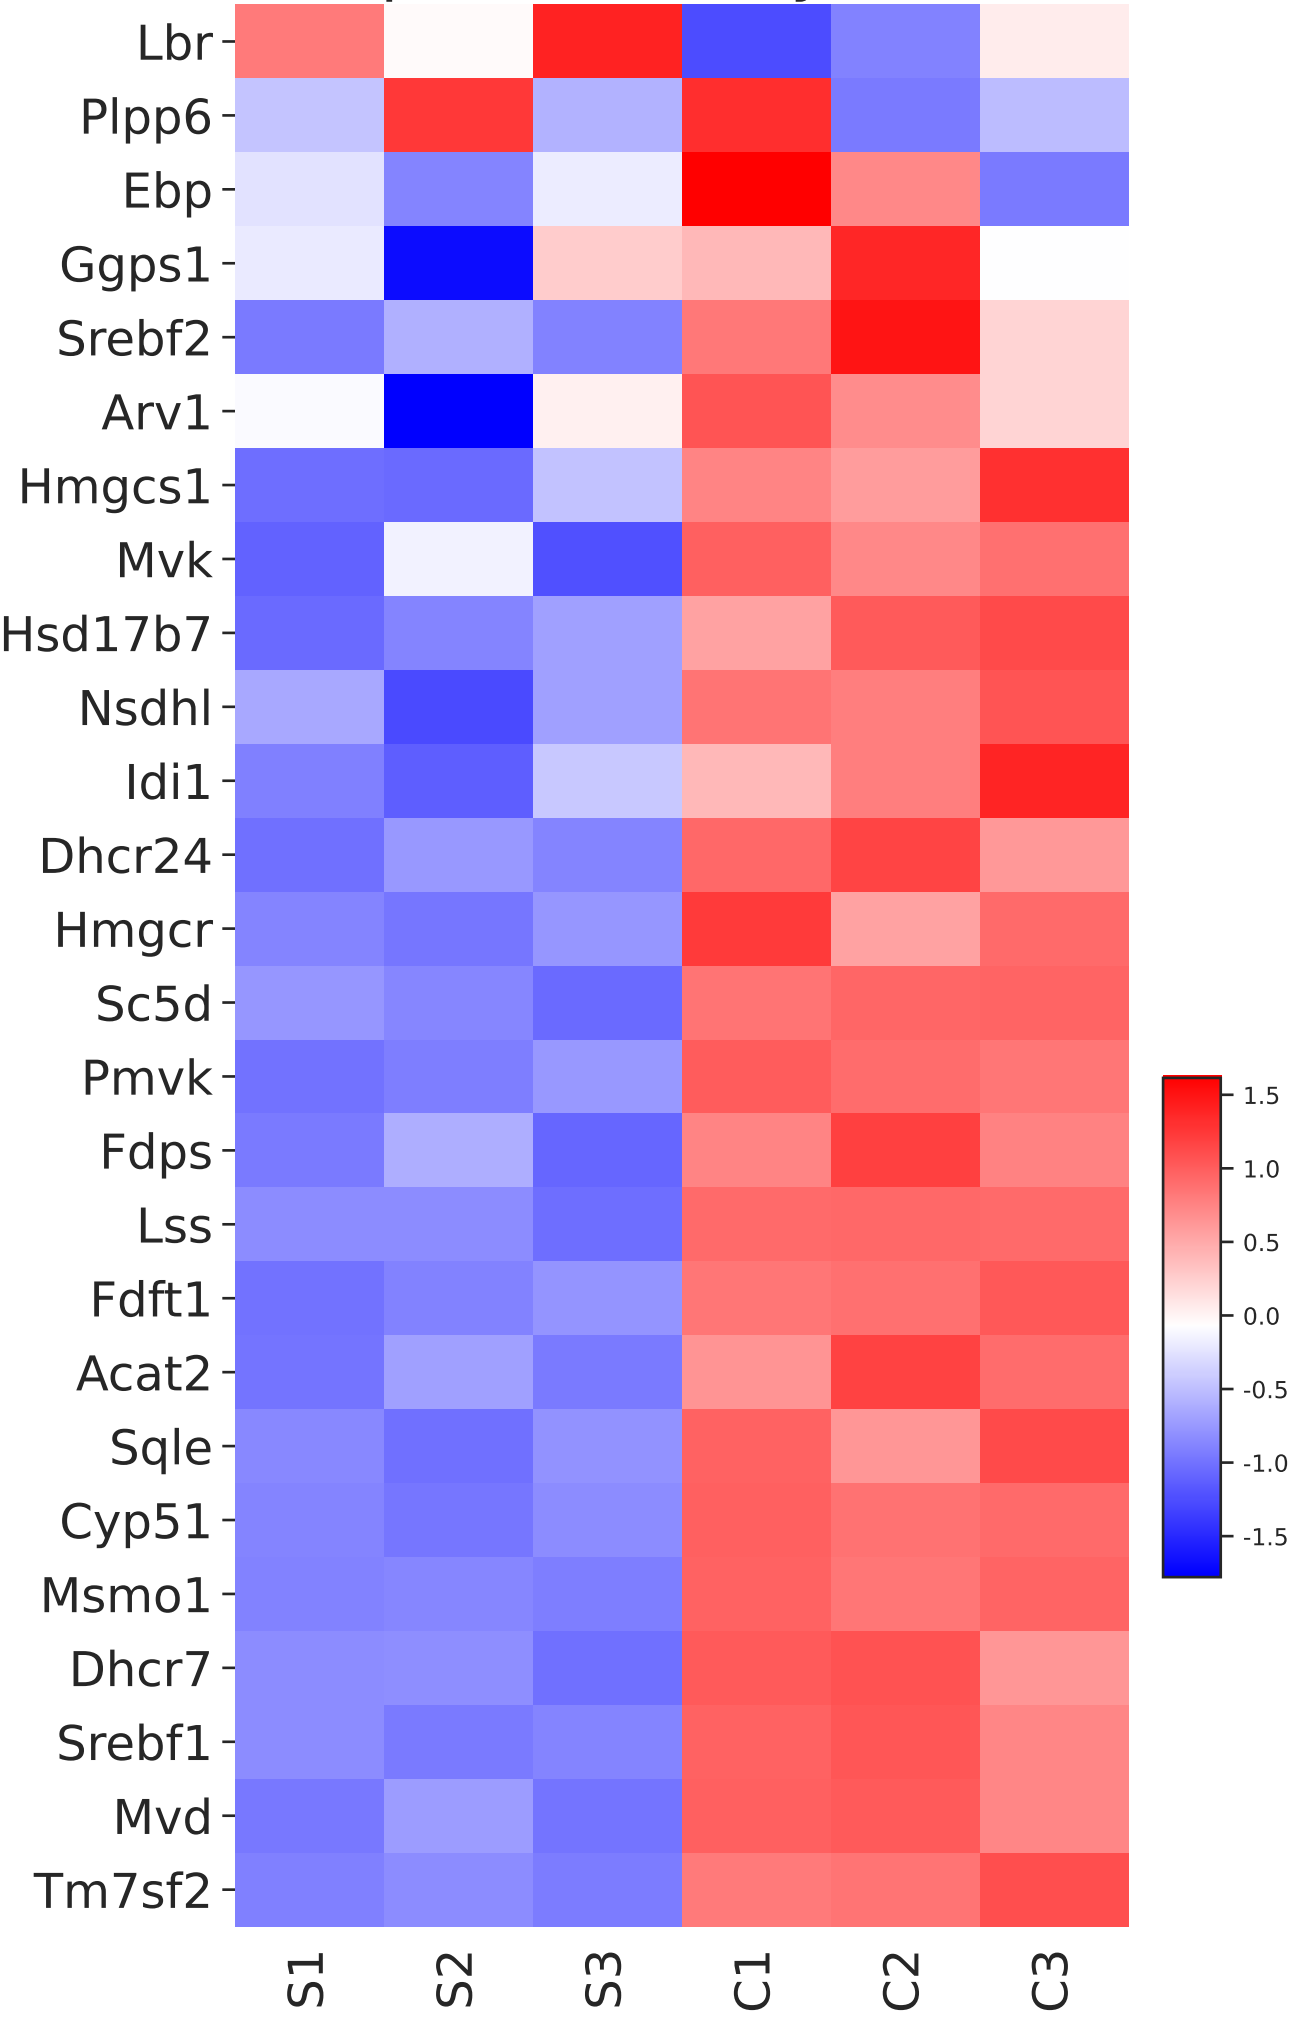

Supplement: Supplementary file 206 [file 786_Cholesterol biosynthesis(R-RNO-191273).heatmap.pdf › Source data/1.RNA-Seq source data/1.BMSCs/result/1.6.GSEA/S-vs-C/rct/786_Cholesterol biosynthesis(R-RNO-191273).heatmap.pdf]

# Cell Cycle Checkpoints(R-RNO-69620)

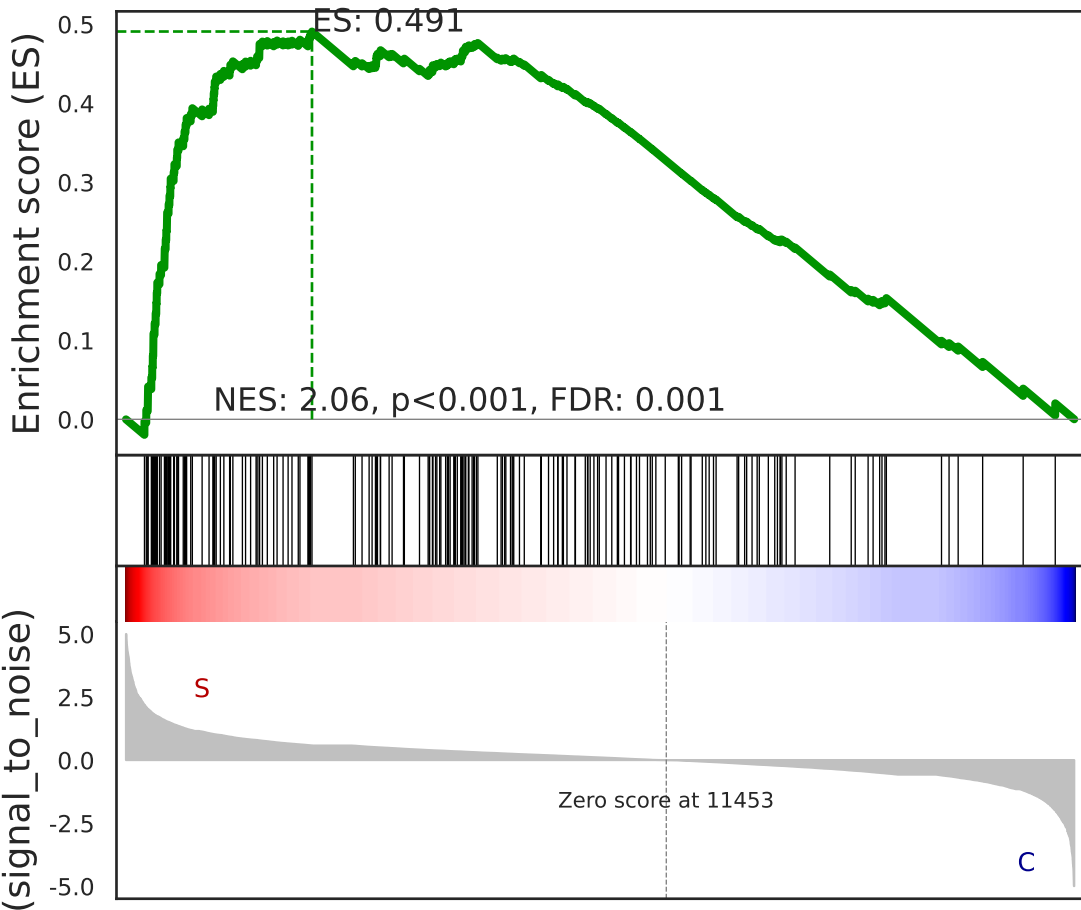

Supplement: Supplementary file 207 [file 7_Cell Cycle Checkpoints(R-RNO-69620).gsea.pdf › Source data/1.RNA-Seq source data/1.BMSCs/result/1.6.GSEA/S-vs-C/rct/7_Cell Cycle Checkpoints(R-RNO-69620).gsea.pdf]

Cell Cycle Checkpoints(R-RNO-69620)  
Heatmap of the Analyzed GeneSet

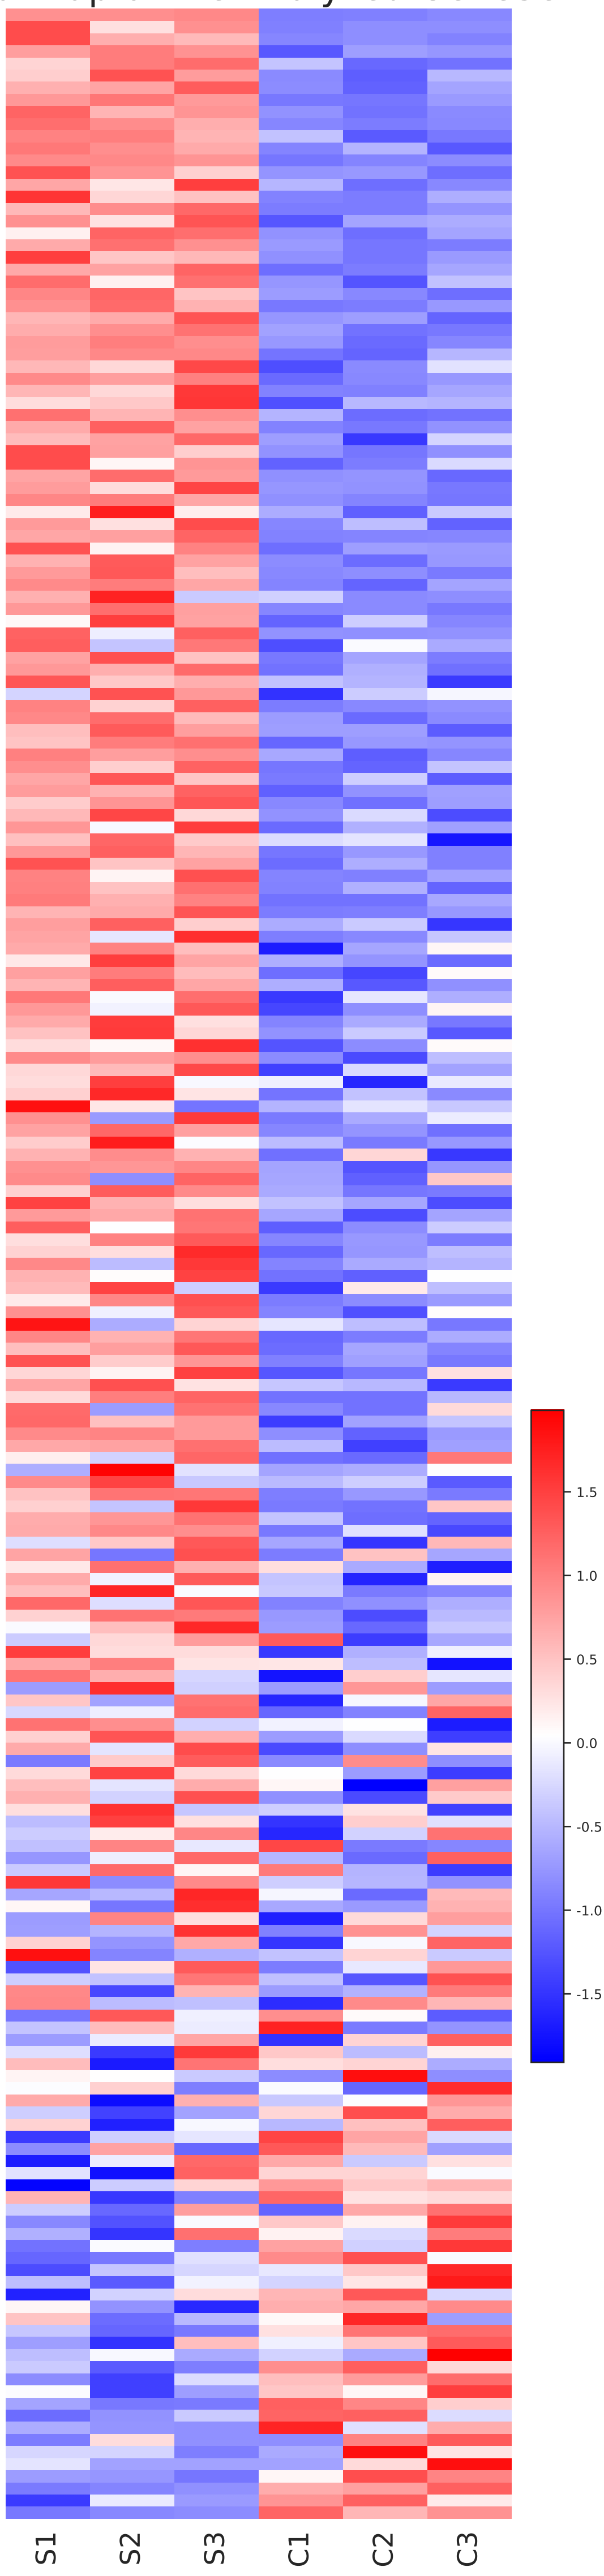

Supplement: Supplementary file 208 [file 7_Cell Cycle Checkpoints(R-RNO-69620).heatmap.pdf › Source data/1.RNA-Seq source data/1.BMSCs/result/1.6.GSEA/S-vs-C/rct/7_Cell Cycle Checkpoints(R-RNO-69620).heatmap.pdf]

# Drug ADME(R-RNO-9748784)

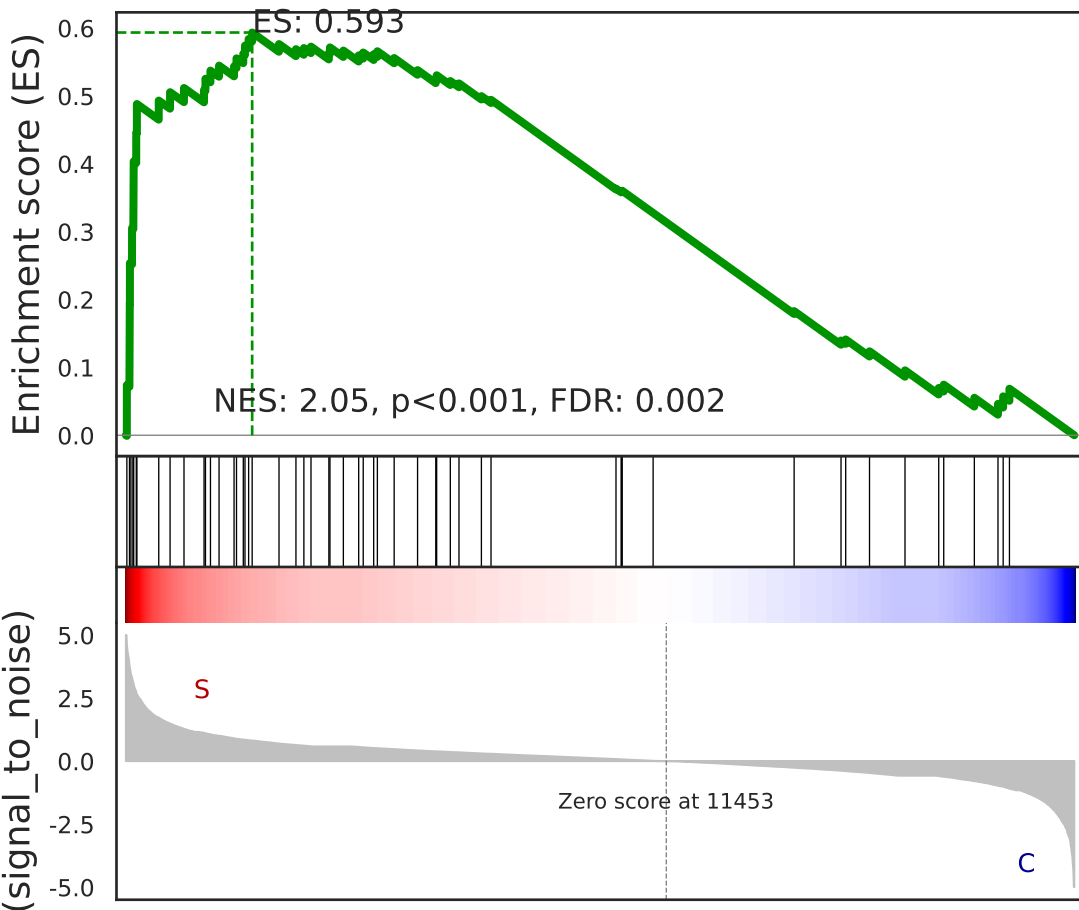

Supplement: Supplementary file 209 [file 8_Drug ADME(R-RNO-9748784).gsea.pdf › Source data/1.RNA-Seq source data/1.BMSCs/result/1.6.GSEA/S-vs-C/rct/8_Drug ADME(R-RNO-9748784).gsea.pdf]

Drug ADME(R-RNO-9748784)  
Heatmap of the Analyzed GeneSet

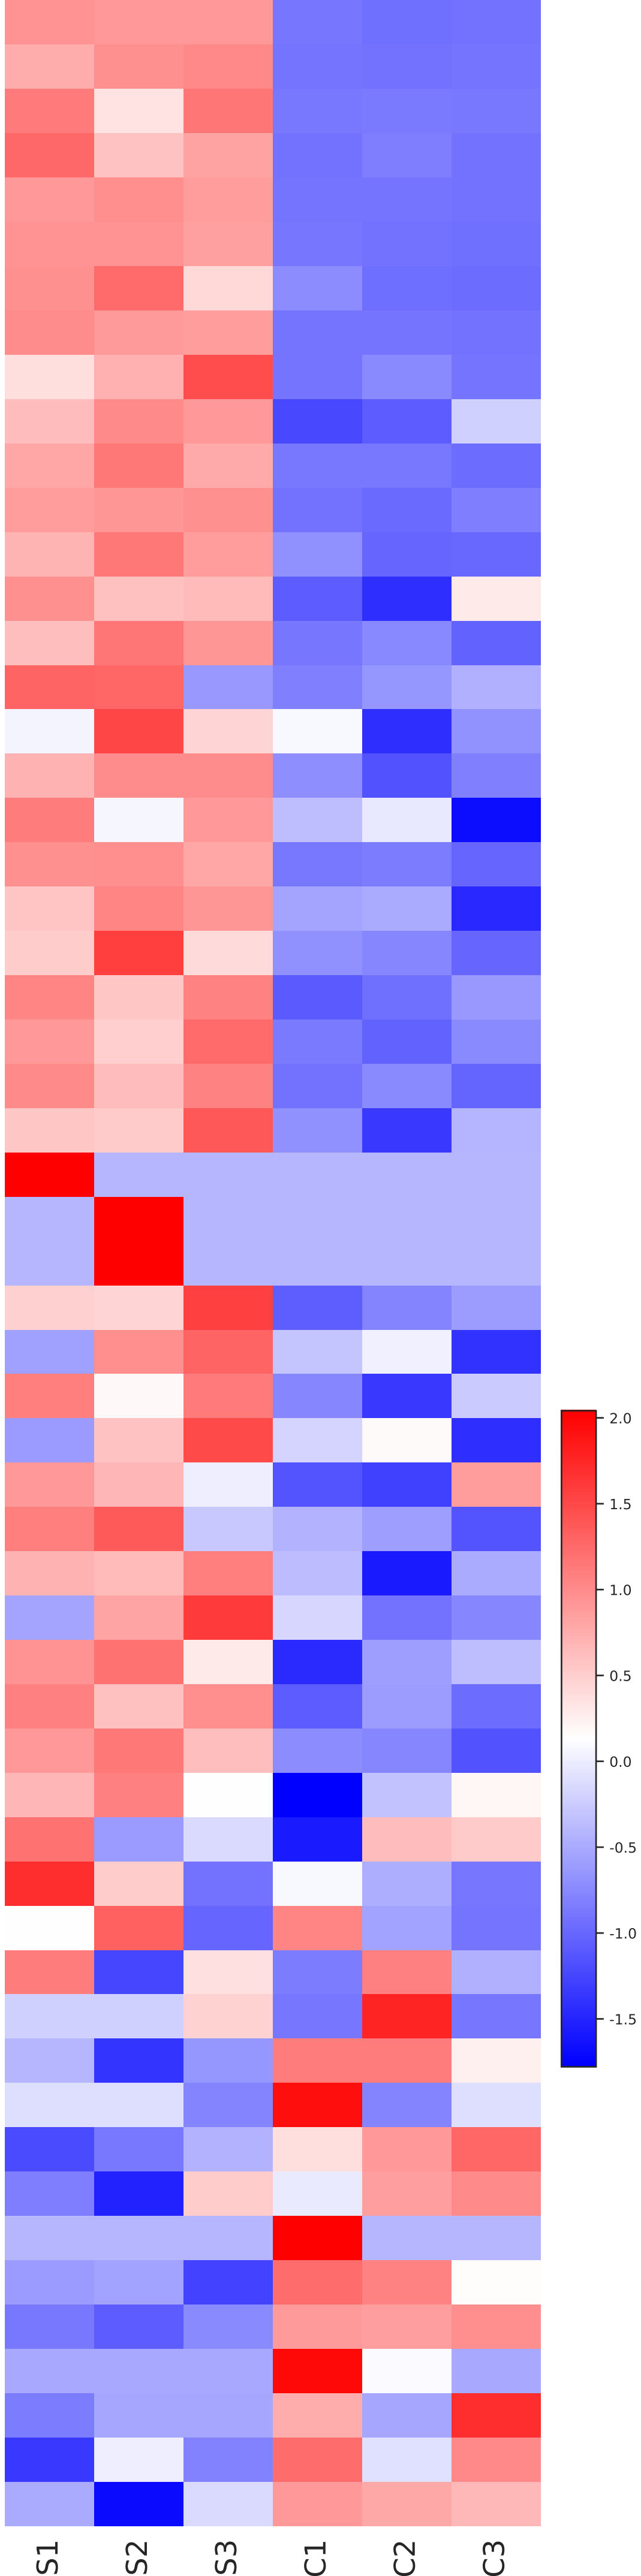

Supplement: Supplementary file 210 [file 8_Drug ADME(R-RNO-9748784).heatmap.pdf › Source data/1.RNA-Seq source data/1.BMSCs/result/1.6.GSEA/S-vs-C/rct/8_Drug ADME(R-RNO-9748784).heatmap.pdf]

# Cell Cycle, Mitotic(R-RNO-69278)

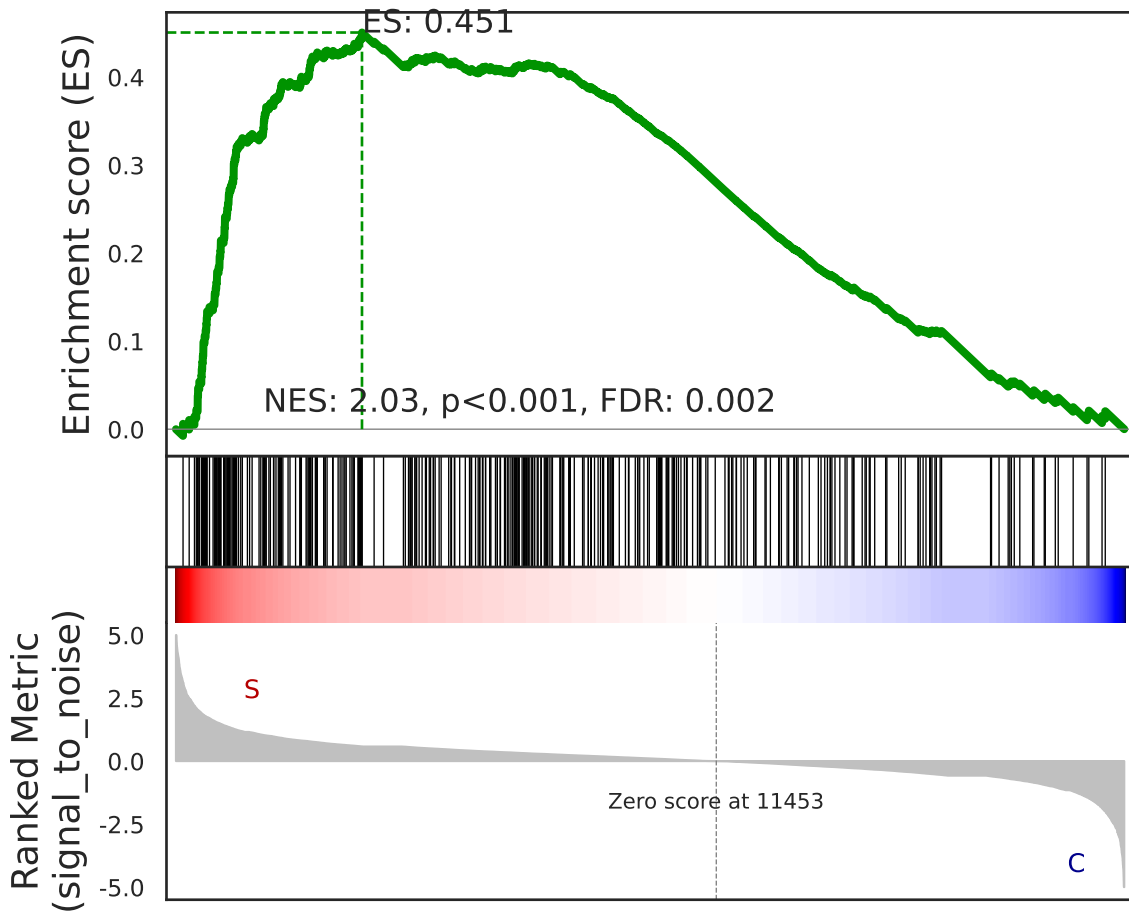

Supplement: Supplementary file 211 [file 9_Cell Cycle, Mitotic(R-RNO-69278).gsea.pdf › Source data/1.RNA-Seq source data/1.BMSCs/result/1.6.GSEA/S-vs-C/rct/9_Cell Cycle, Mitotic(R-RNO-69278).gsea.pdf]

Cell Cycle, Mitotic(R-RNO-69278)  
Heatmap of the Analyzed GeneSet

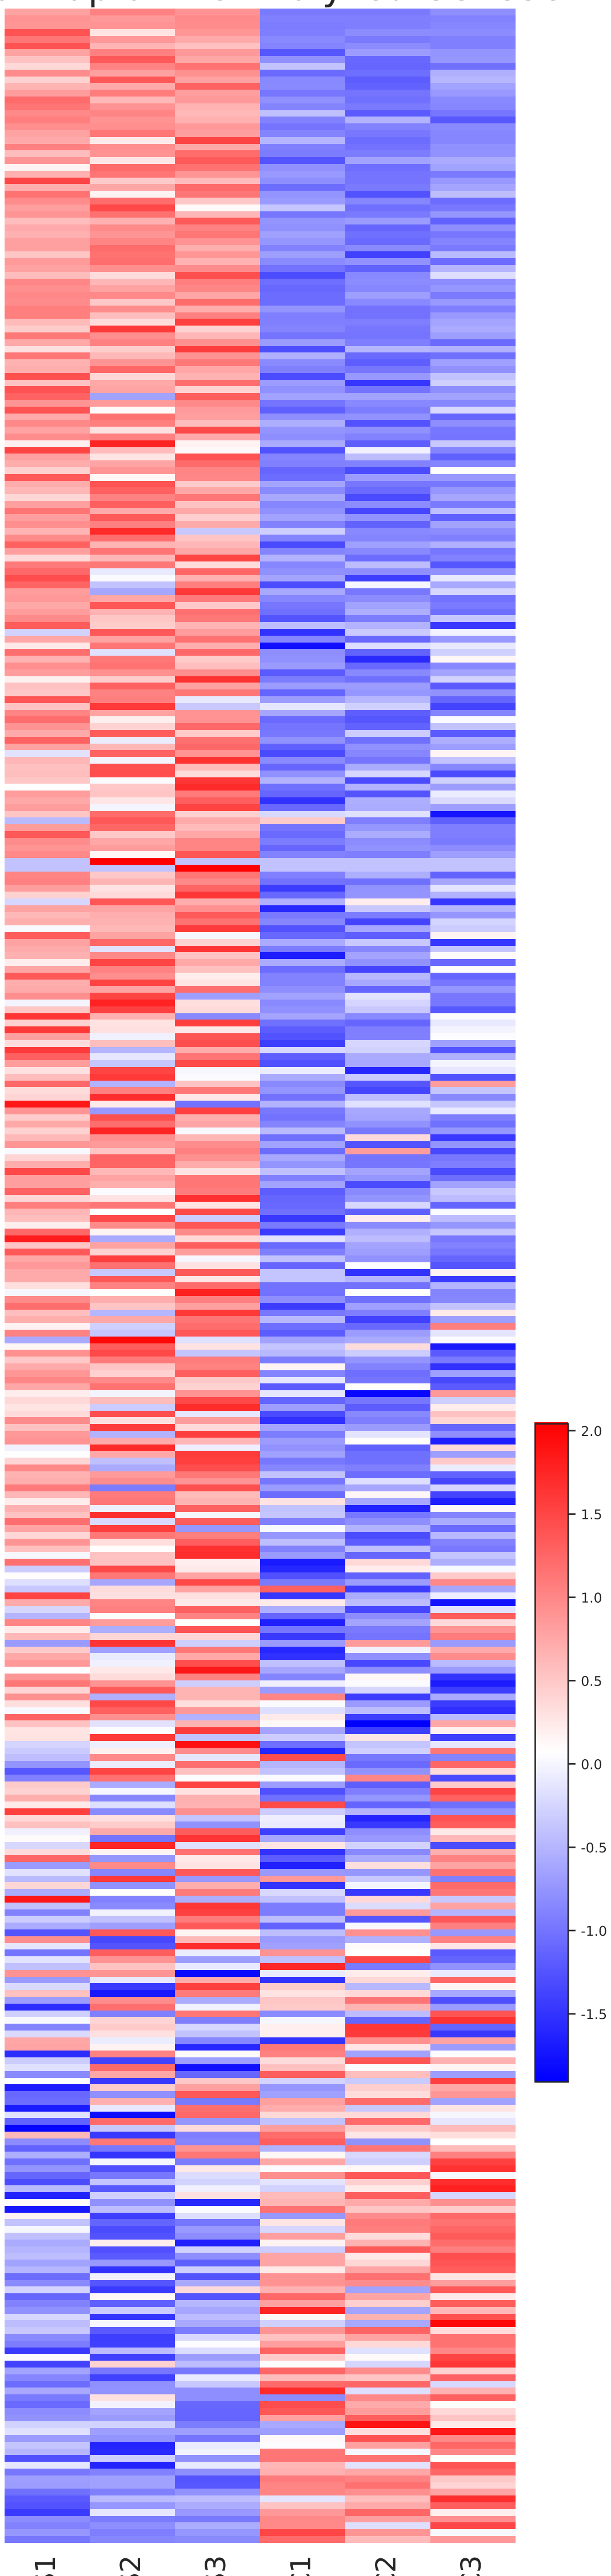

Supplement: Supplementary file 212 [file 9_Cell Cycle, Mitotic(R-RNO-69278).heatmap.pdf › Source data/1.RNA-Seq source data/1.BMSCs/result/1.6.GSEA/S-vs-C/rct/9_Cell Cycle, Mitotic(R-RNO-69278).heatmap.pdf]

# mRNA processing(WP529)

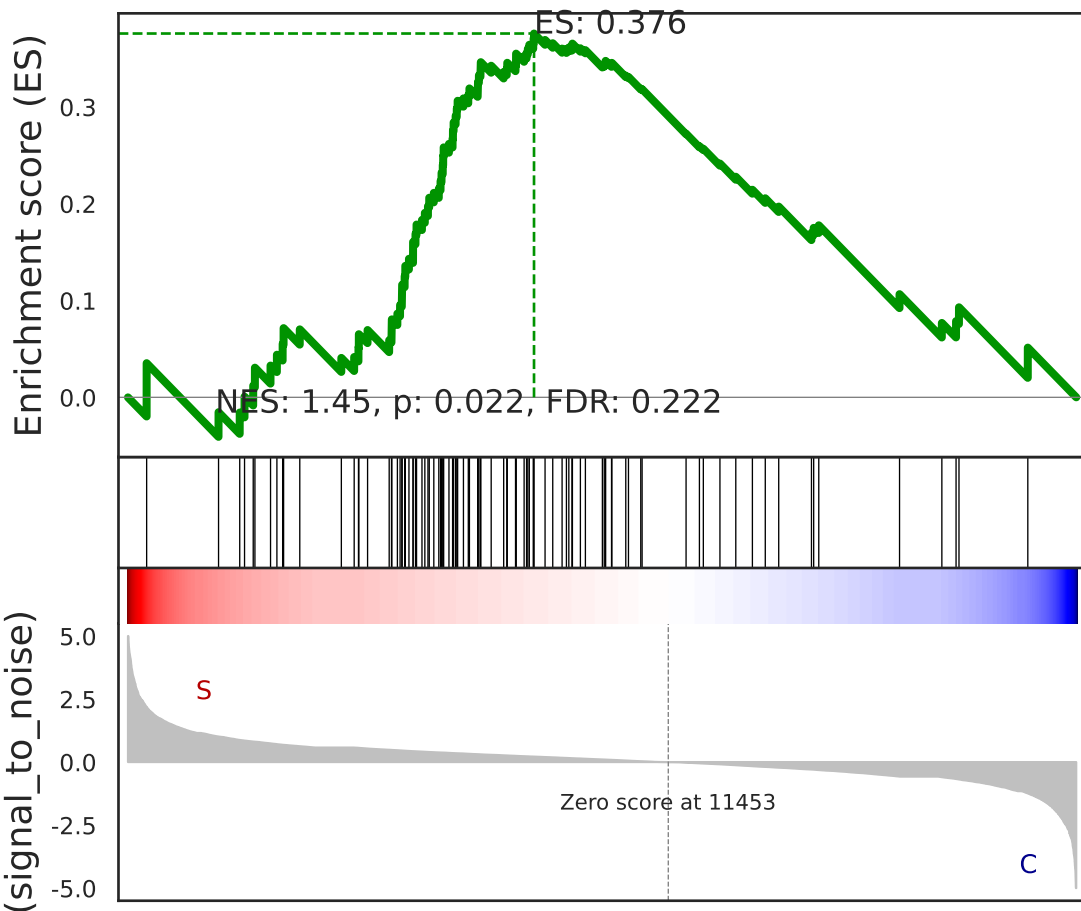

Supplement: Supplementary file 213 [file 10_mRNA processing(WP529).gsea.pdf › Source data/1.RNA-Seq source data/1.BMSCs/result/1.6.GSEA/S-vs-C/wiki/10_mRNA processing(WP529).gsea.pdf]

# mRNA processing(WP529)

## Heatmap of the Analyzed GeneSet

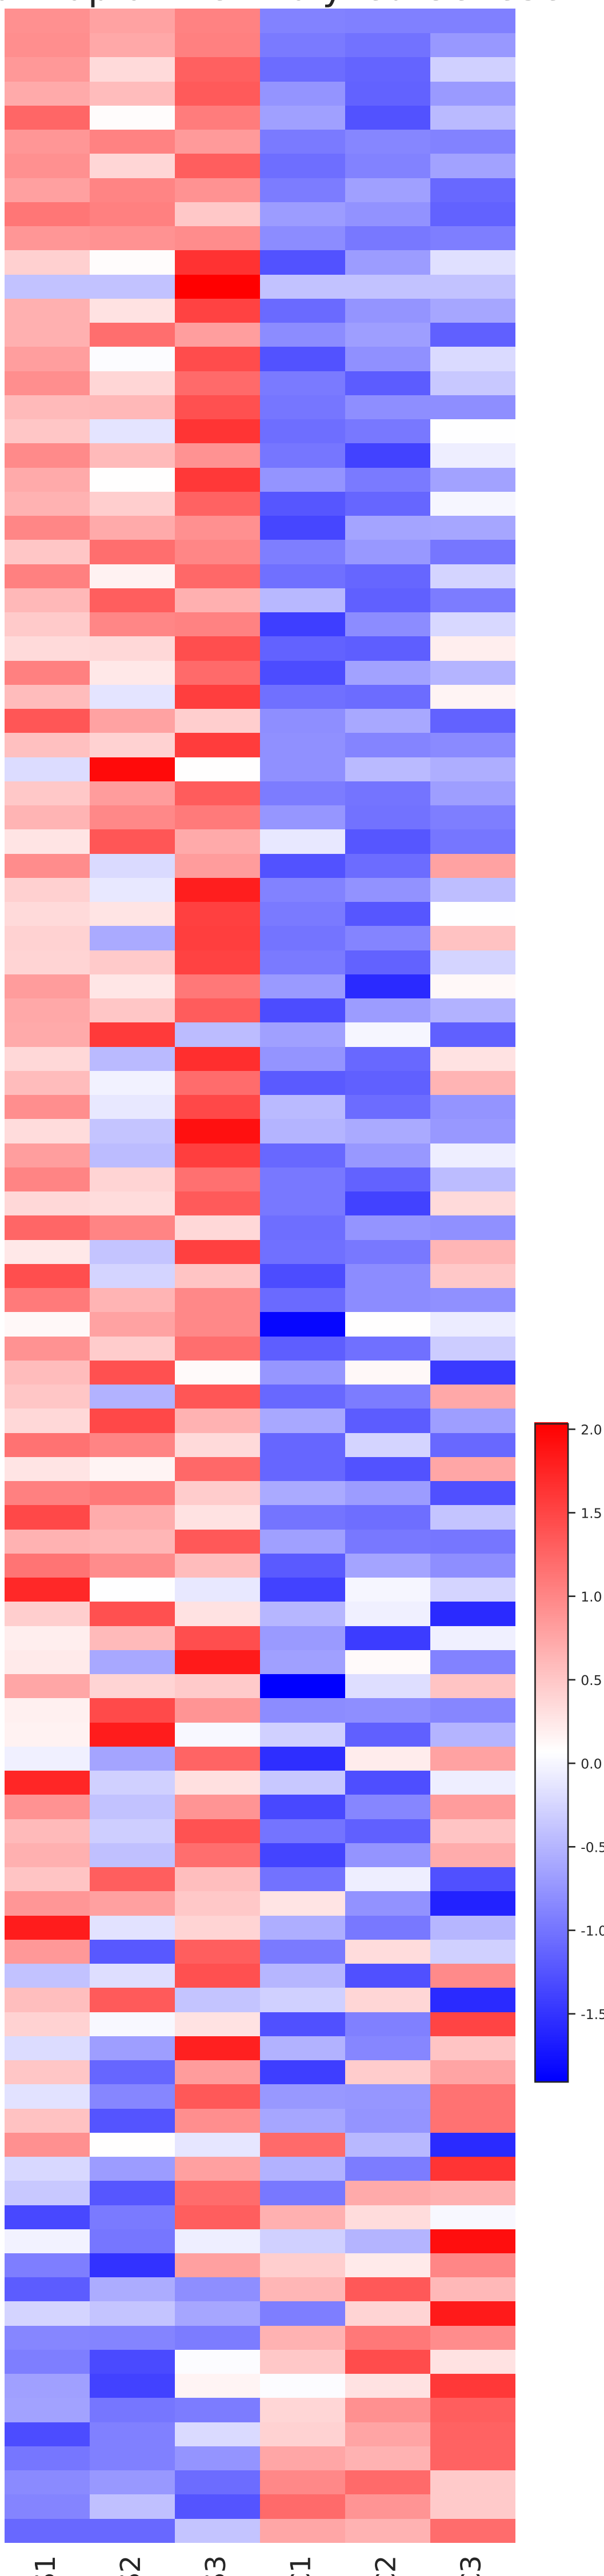

Supplement: Supplementary file 214 [file 10_mRNA processing(WP529).heatmap.pdf › Source data/1.RNA-Seq source data/1.BMSCs/result/1.6.GSEA/S-vs-C/wiki/10_mRNA processing(WP529).heatmap.pdf]

# Relationship between glutathione and NADPH(WP2562)

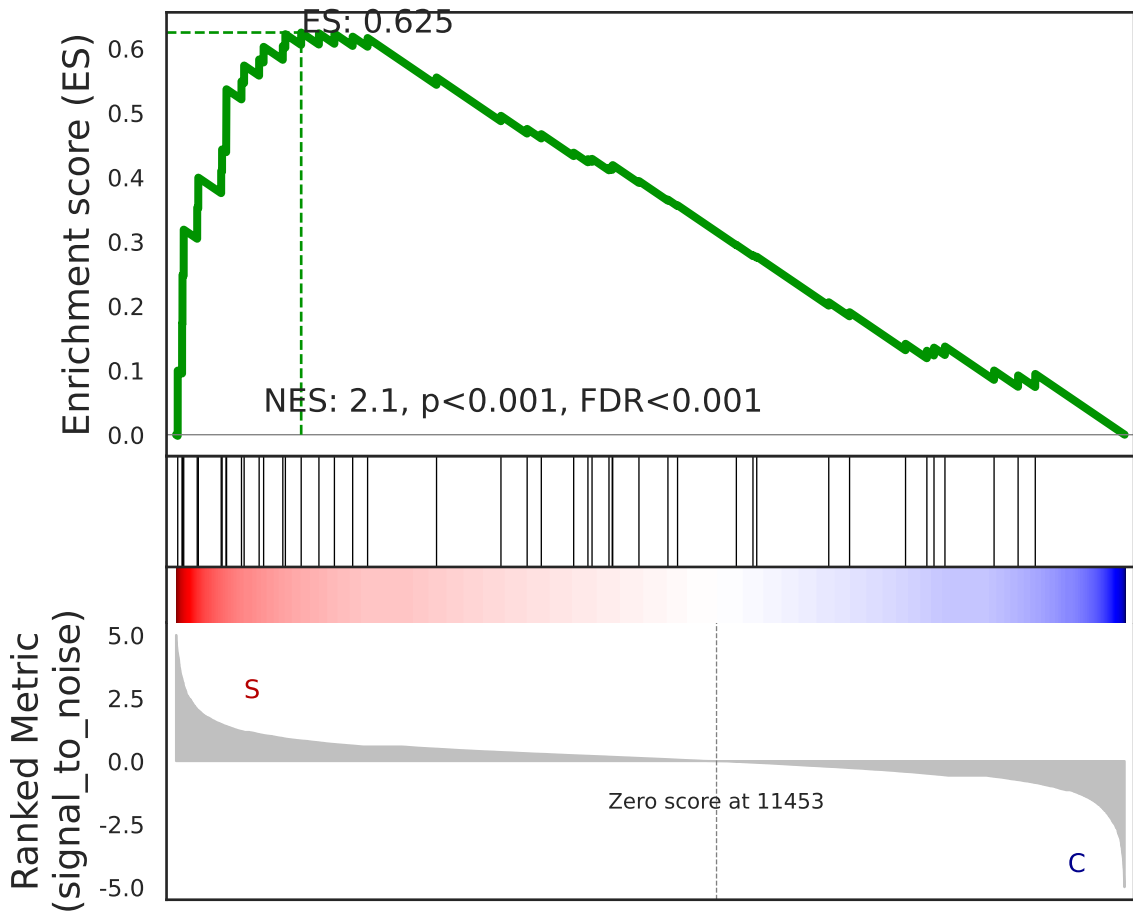

Supplement: Supplementary file 215 [file 1_Relationship between glutathione and NADPH(WP2562).gsea.pdf › Source data/1.RNA-Seq source data/1.BMSCs/result/1.6.GSEA/S-vs-C/wiki/1_Relationship between glutathione and NADPH(WP2562).gsea.pdf]

Relationship between glutathione and NADPH(WP2562)  
Heatmap of the Analyzed GeneSet

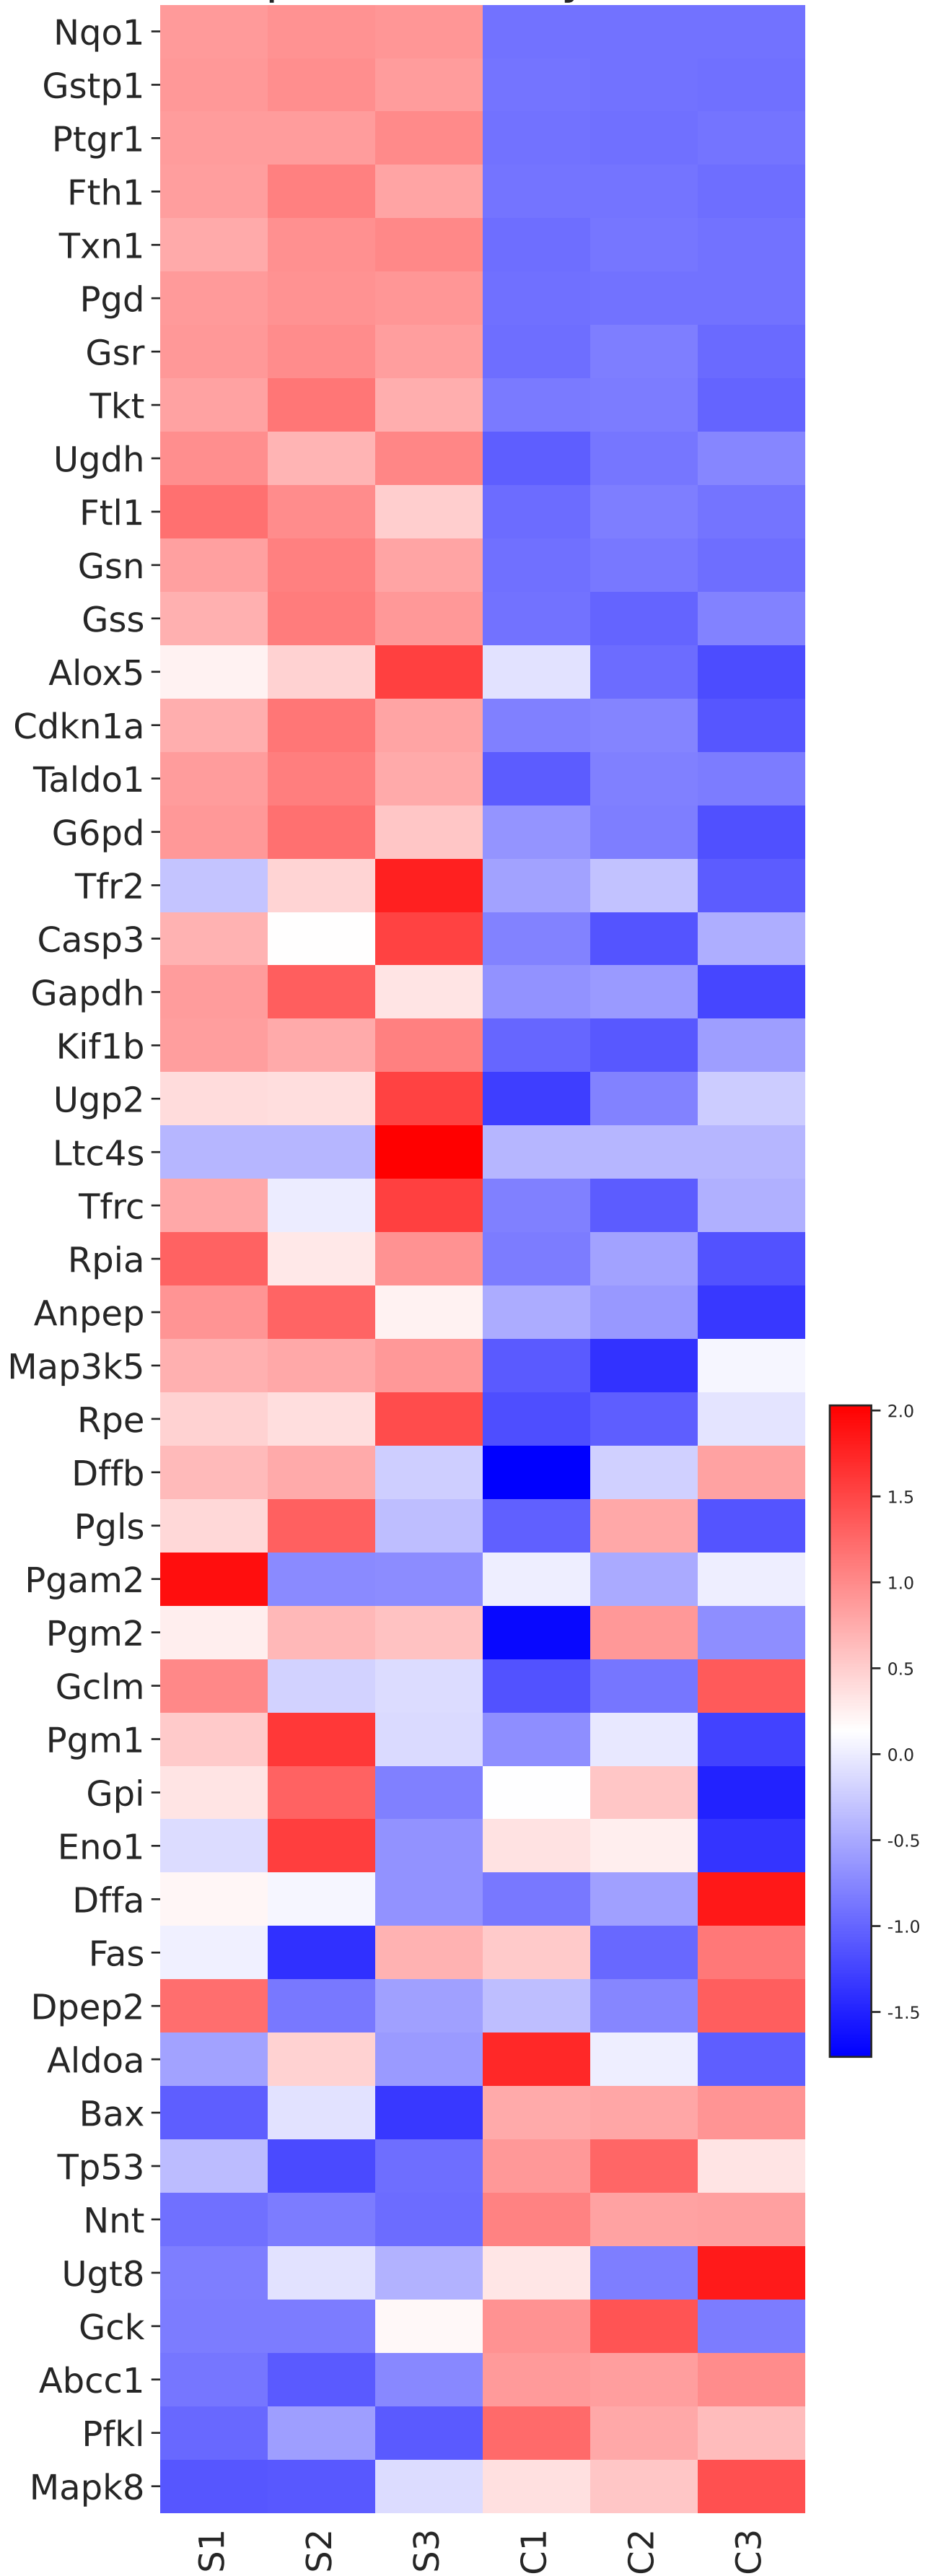

Supplement: Supplementary file 216 [file 1_Relationship between glutathione and NADPH(WP2562).heatmap.pdf › Source data/1.RNA-Seq source data/1.BMSCs/result/1.6.GSEA/S-vs-C/wiki/1_Relationship between glutathione and NADPH(WP2562).heatmap.pdf]

# Glutathione metabolism(WP469)

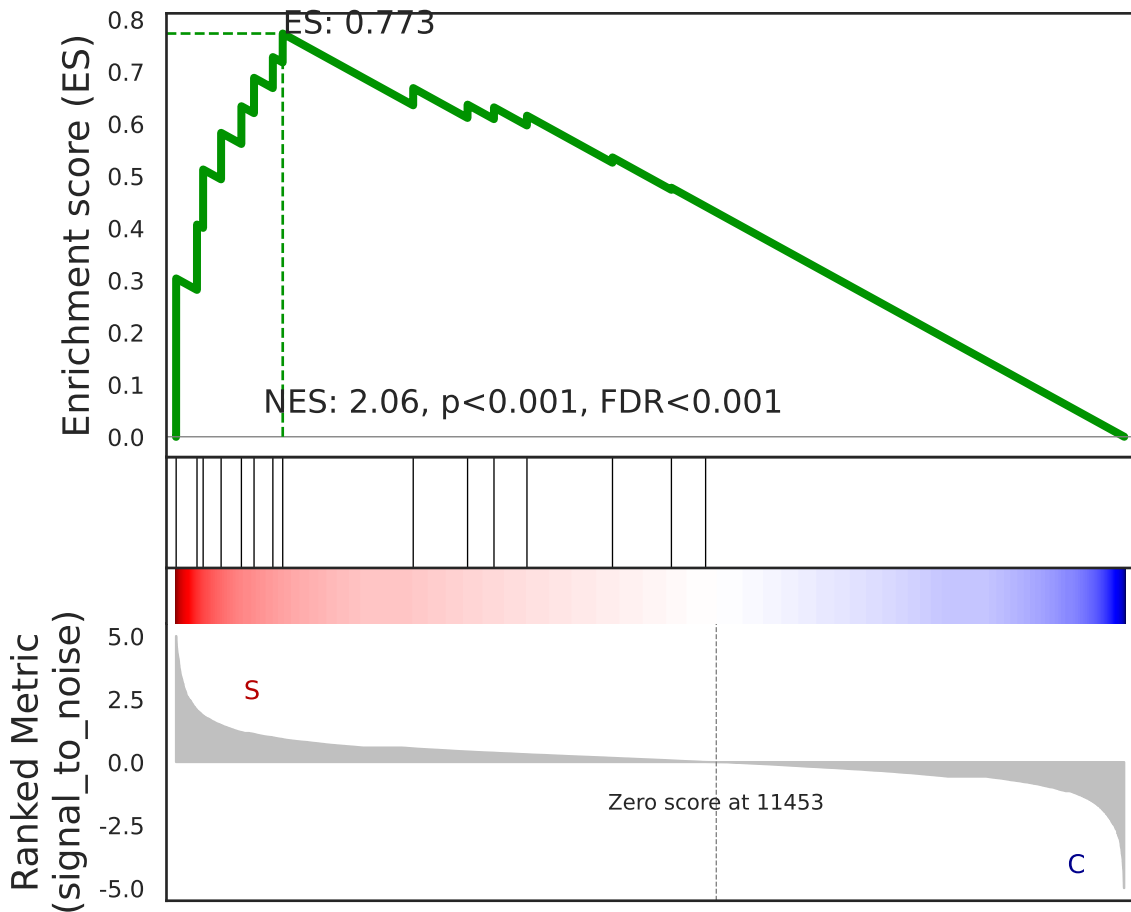

Supplement: Supplementary file 217 [file 2_Glutathione metabolism(WP469).gsea.pdf › Source data/1.RNA-Seq source data/1.BMSCs/result/1.6.GSEA/S-vs-C/wiki/2_Glutathione metabolism(WP469).gsea.pdf]

# Glutathione metabolism(WP469)

## Heatmap of the Analyzed GeneSet

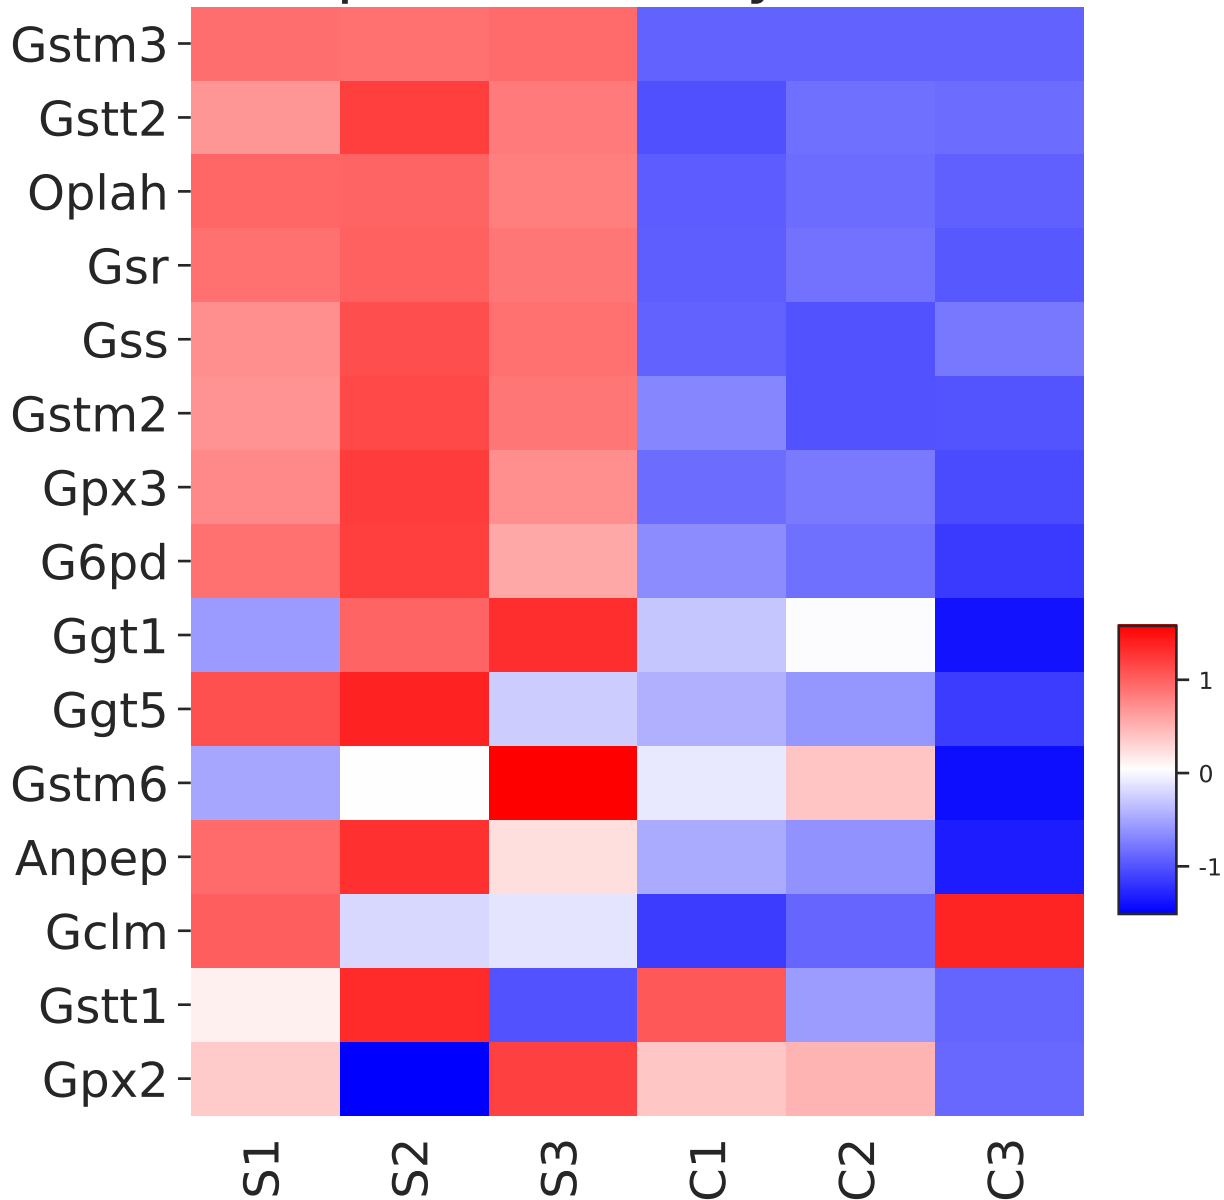

Supplement: Supplementary file 218 [file 2_Glutathione metabolism(WP469).heatmap.pdf › Source data/1.RNA-Seq source data/1.BMSCs/result/1.6.GSEA/S-vs-C/wiki/2_Glutathione metabolism(WP469).heatmap.pdf]

# G1 to S cell cycle control(WP348)

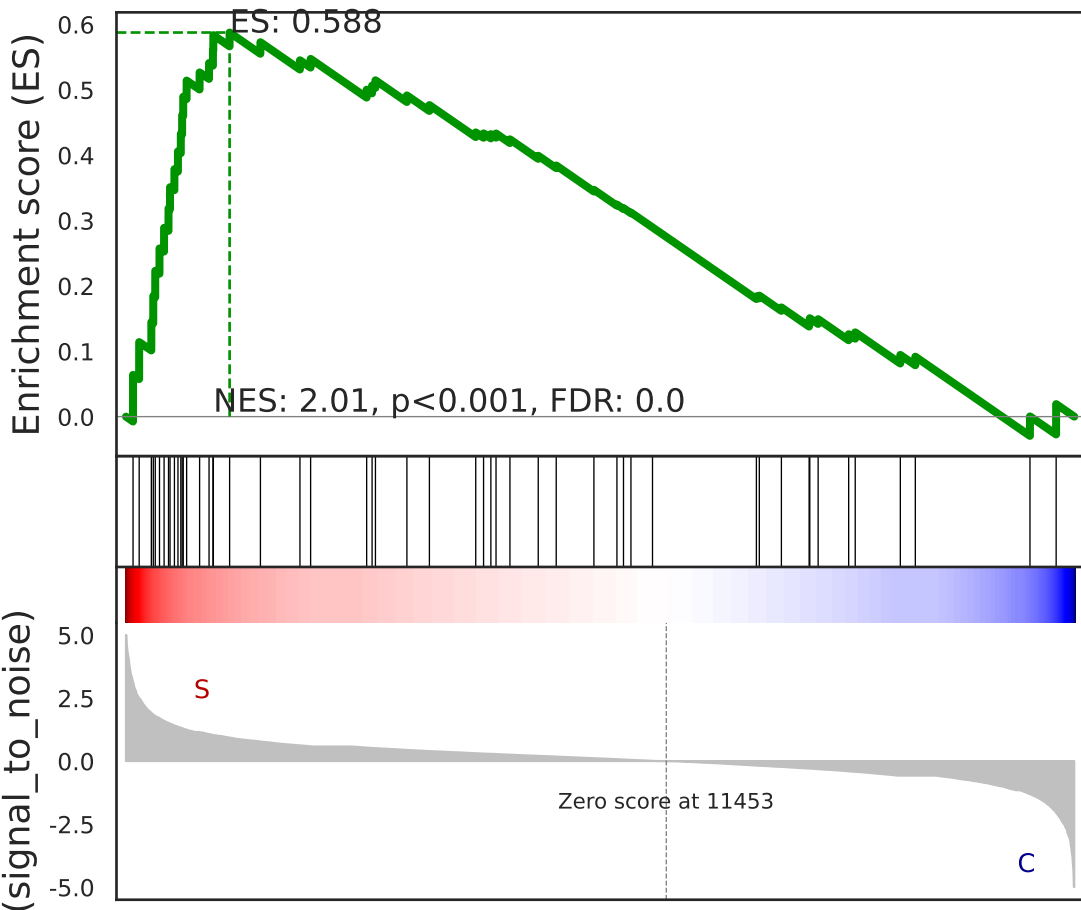

Supplement: Supplementary file 219 [file 3_G1 to S cell cycle control(WP348).gsea.pdf › Source data/1.RNA-Seq source data/1.BMSCs/result/1.6.GSEA/S-vs-C/wiki/3_G1 to S cell cycle control(WP348).gsea.pdf]

G1 to S cell cycle control(WP348)  
Heatmap of the Analyzed GeneSet

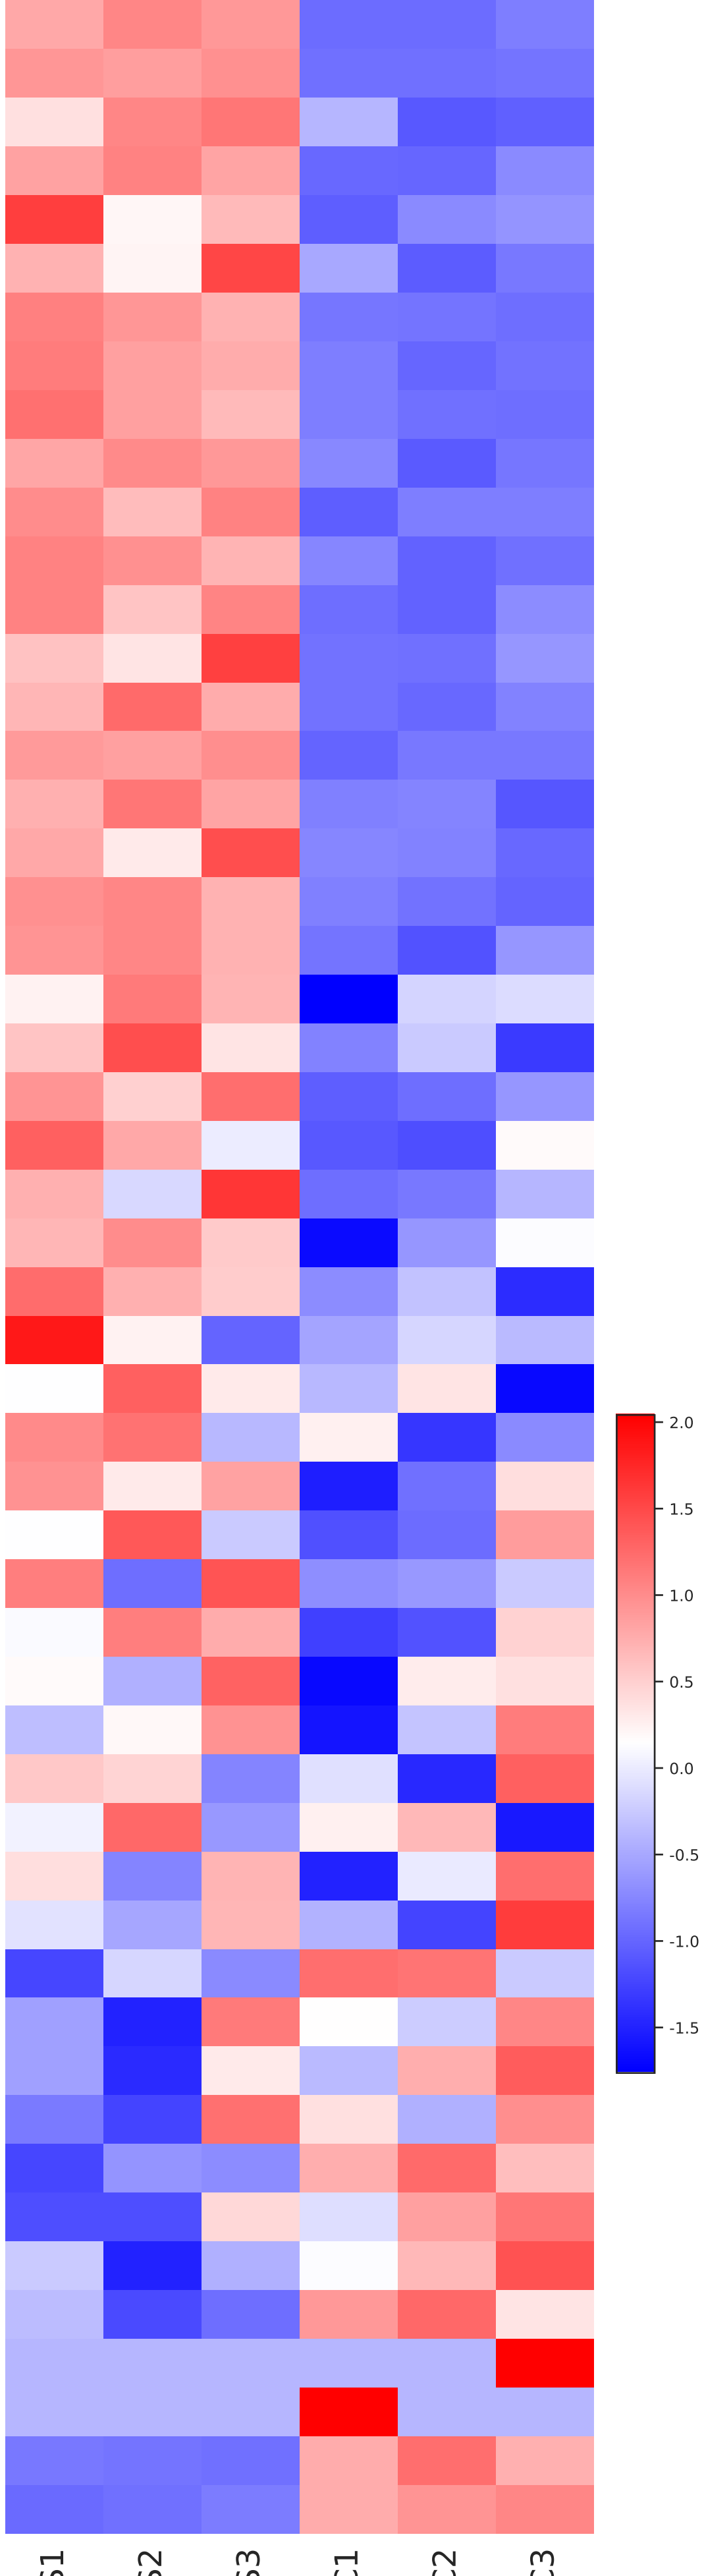

Supplement: Supplementary file 220 [file 3_G1 to S cell cycle control(WP348).heatmap.pdf › Source data/1.RNA-Seq source data/1.BMSCs/result/1.6.GSEA/S-vs-C/wiki/3_G1 to S cell cycle control(WP348).heatmap.pdf]

# Metapathway biotransformation(WP1286)

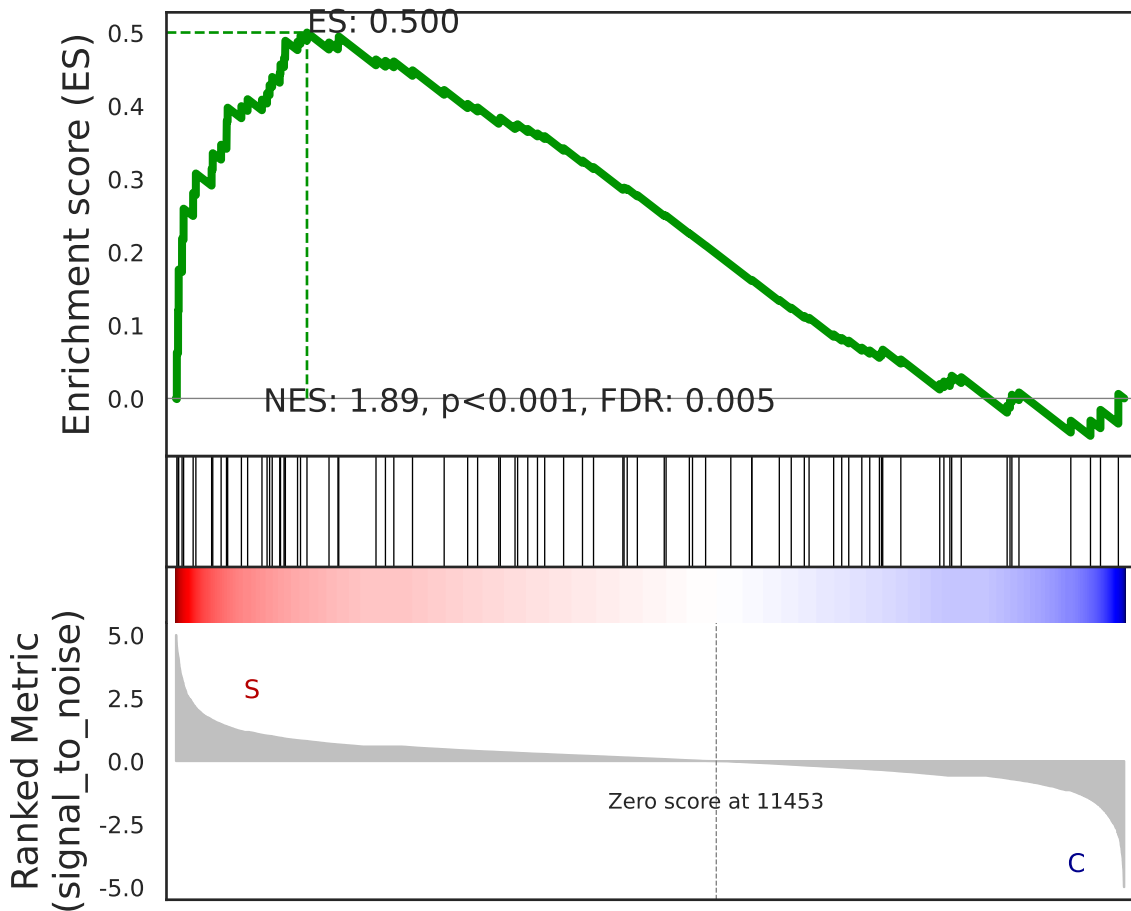

Supplement: Supplementary file 221 [file 4_Metapathway biotransformation(WP1286).gsea.pdf › Source data/1.RNA-Seq source data/1.BMSCs/result/1.6.GSEA/S-vs-C/wiki/4_Metapathway biotransformation(WP1286).gsea.pdf]

Metapathway biotransformation(WP1286)  
Heatmap of the Analyzed GeneSet

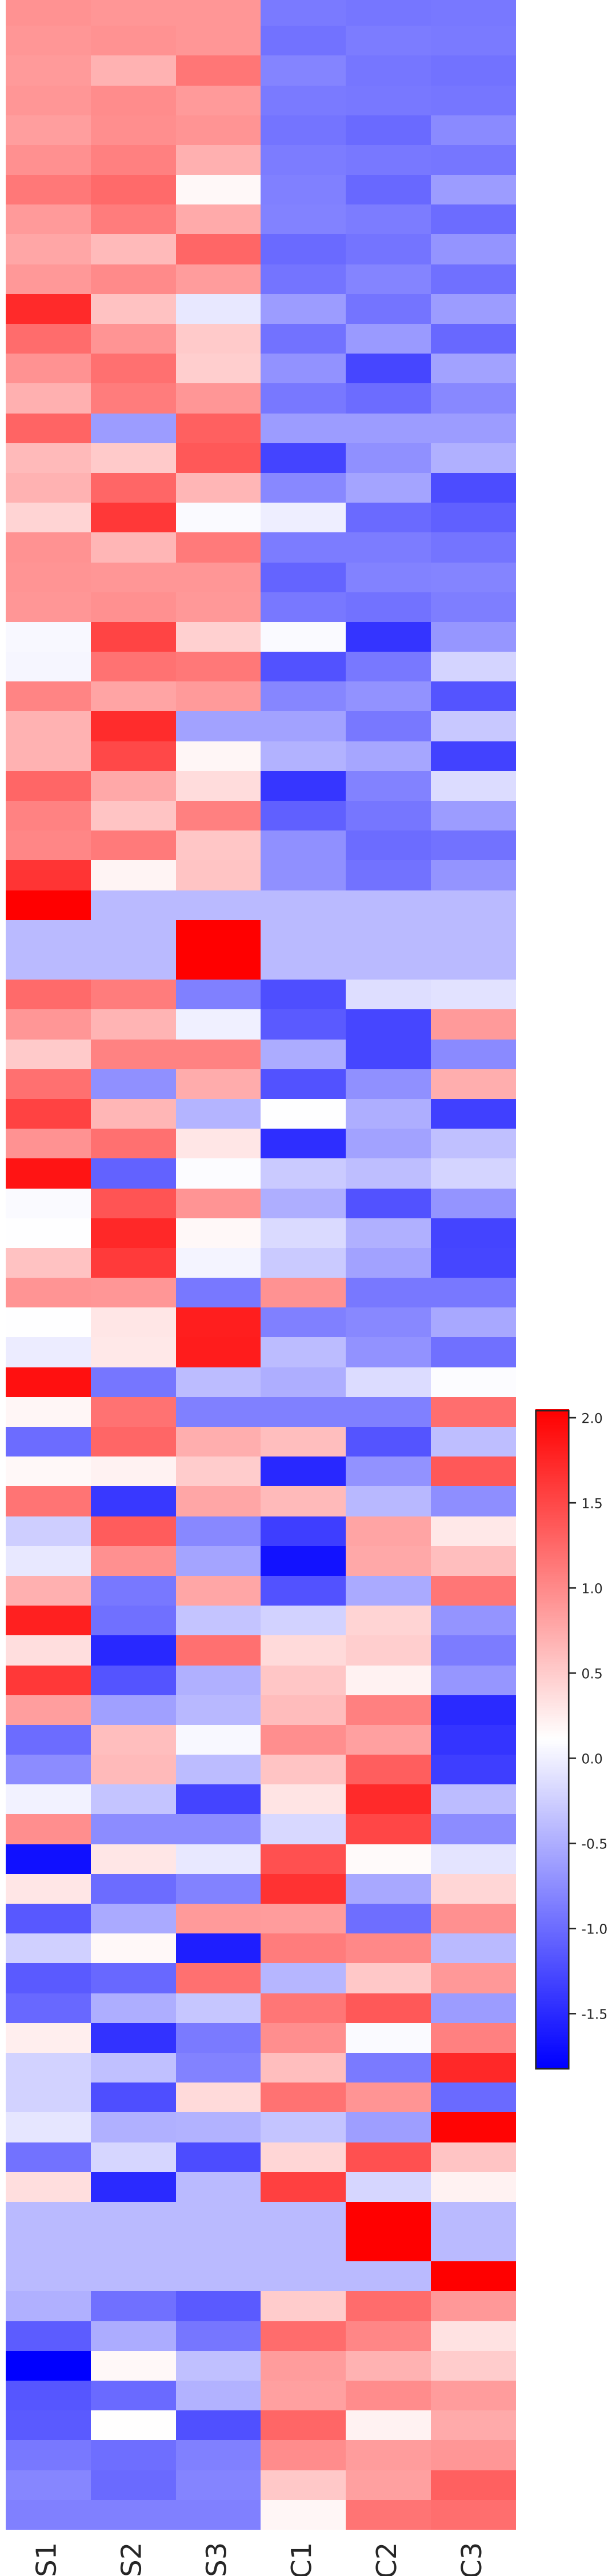

Supplement: Supplementary file 222 [file 4_Metapathway biotransformation(WP1286).heatmap.pdf › Source data/1.RNA-Seq source data/1.BMSCs/result/1.6.GSEA/S-vs-C/wiki/4_Metapathway biotransformation(WP1286).heatmap.pdf]

# Thick ascending limb transporters(WP3882)

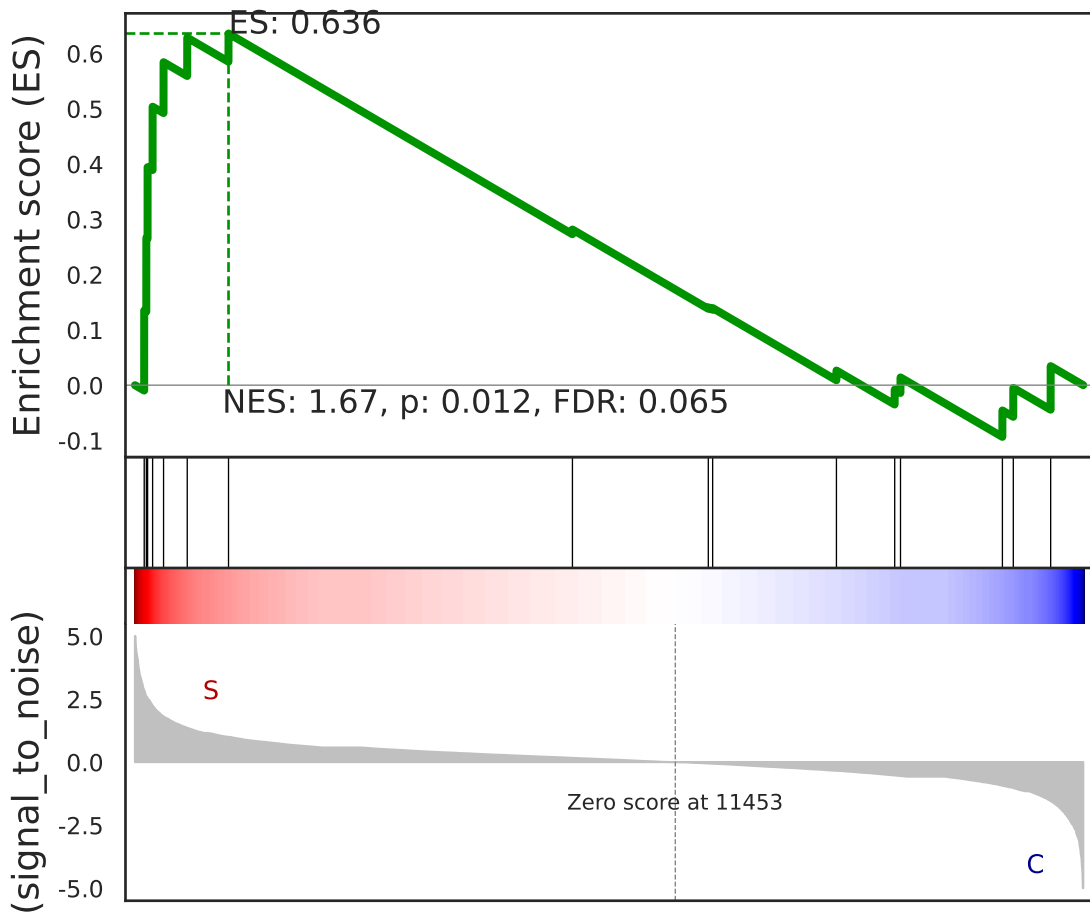

Supplement: Supplementary file 223 [file 5_Thick ascending limb transporters(WP3882).gsea.pdf › Source data/1.RNA-Seq source data/1.BMSCs/result/1.6.GSEA/S-vs-C/wiki/5_Thick ascending limb transporters(WP3882).gsea.pdf]

# Thick ascending limb transporters(WP3882)

## Heatmap of the Analyzed GeneSet

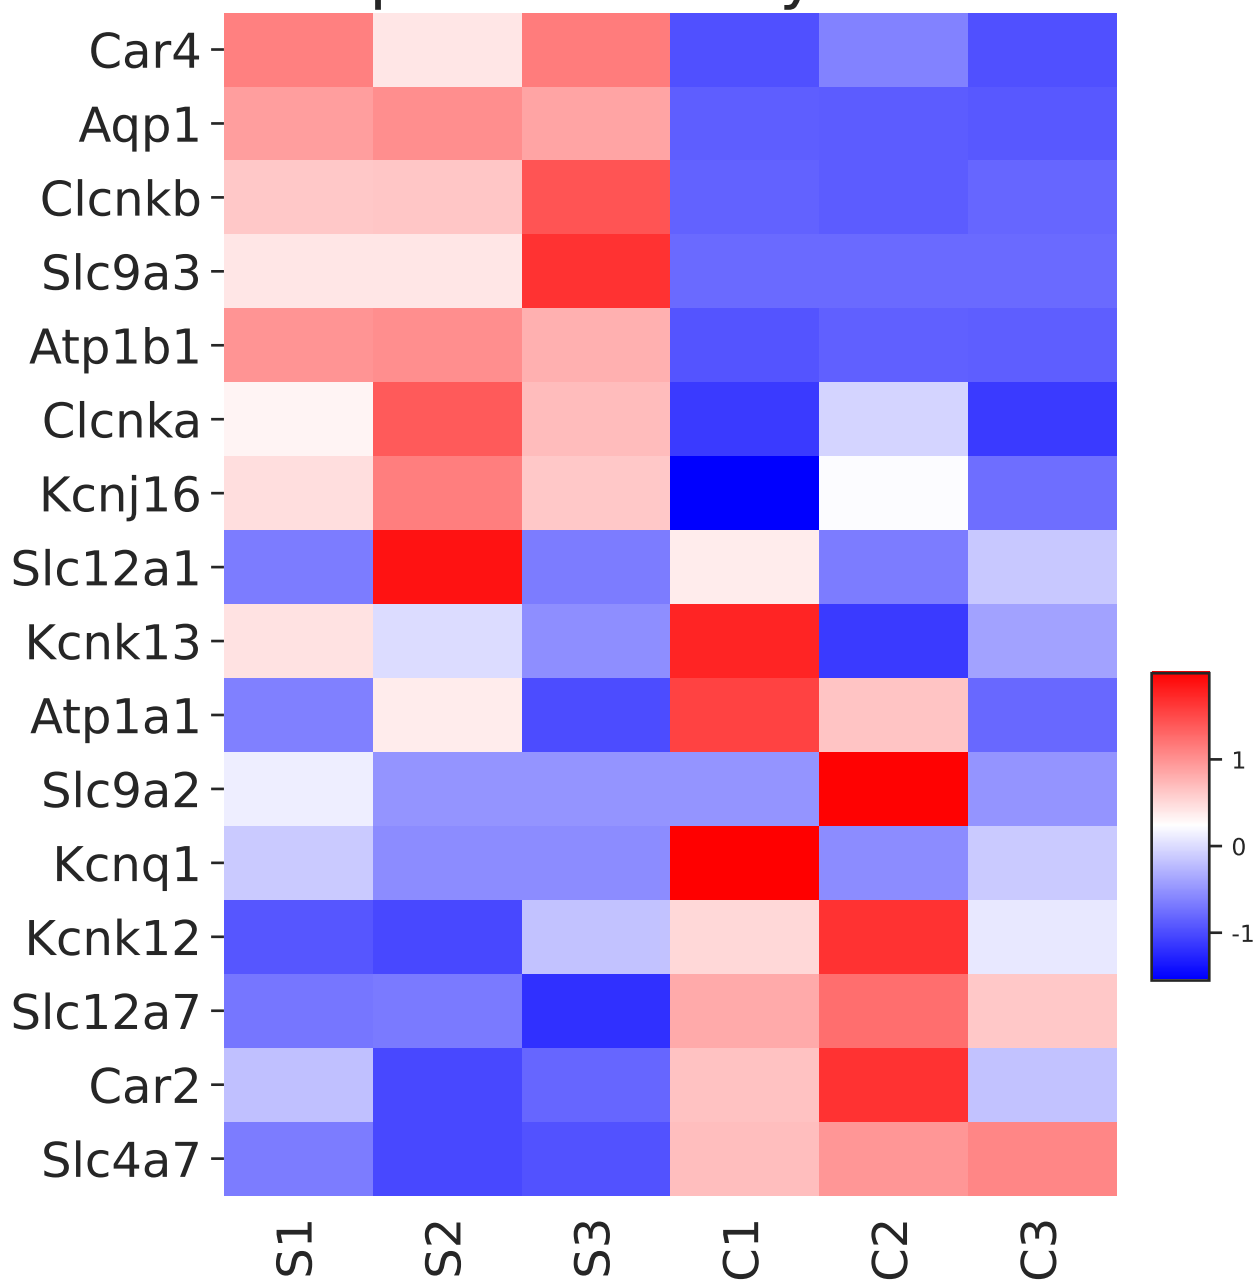

Supplement: Supplementary file 224 [file 5_Thick ascending limb transporters(WP3882).heatmap.pdf › Source data/1.RNA-Seq source data/1.BMSCs/result/1.6.GSEA/S-vs-C/wiki/5_Thick ascending limb transporters(WP3882).heatmap.pdf]

# Retinol metabolism(WP1297)

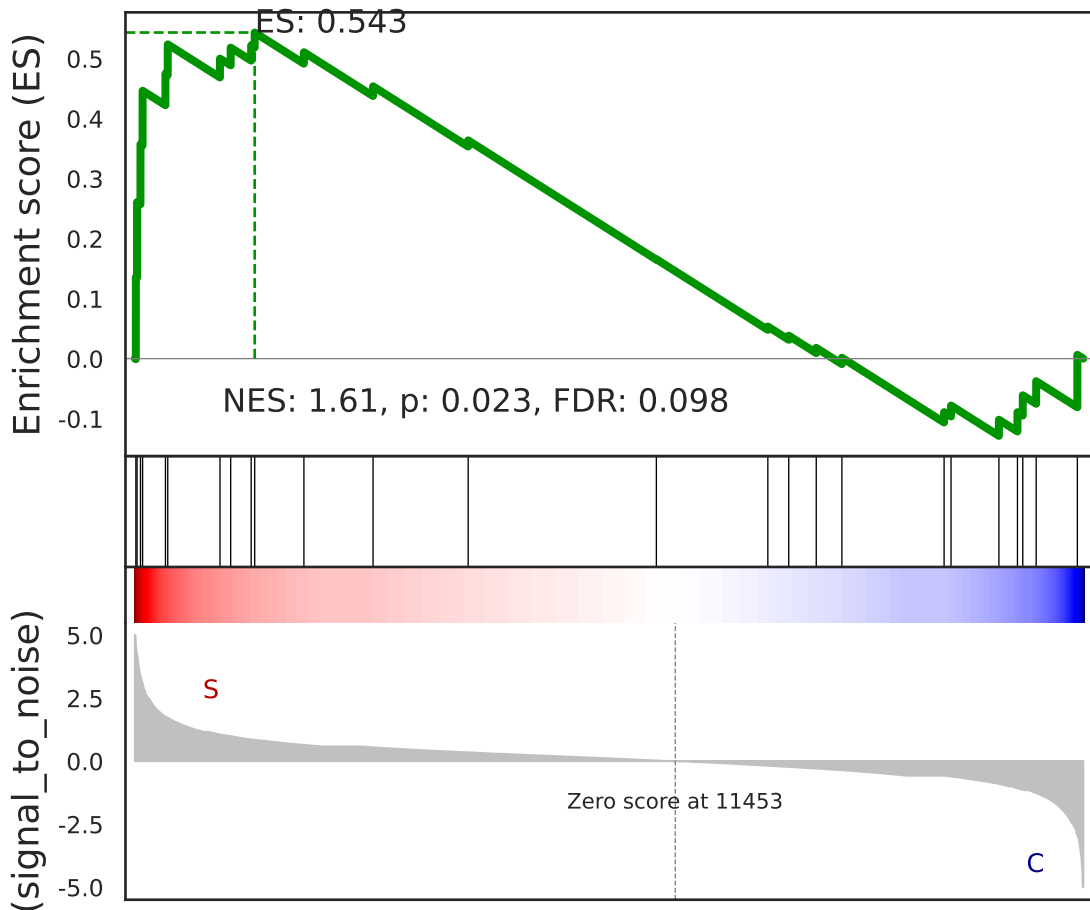

Supplement: Supplementary file 225 [file 6_Retinol metabolism(WP1297).gsea.pdf › Source data/1.RNA-Seq source data/1.BMSCs/result/1.6.GSEA/S-vs-C/wiki/6_Retinol metabolism(WP1297).gsea.pdf]

# Retinol metabolism(WP1297)

## Heatmap of the Analyzed GeneSet

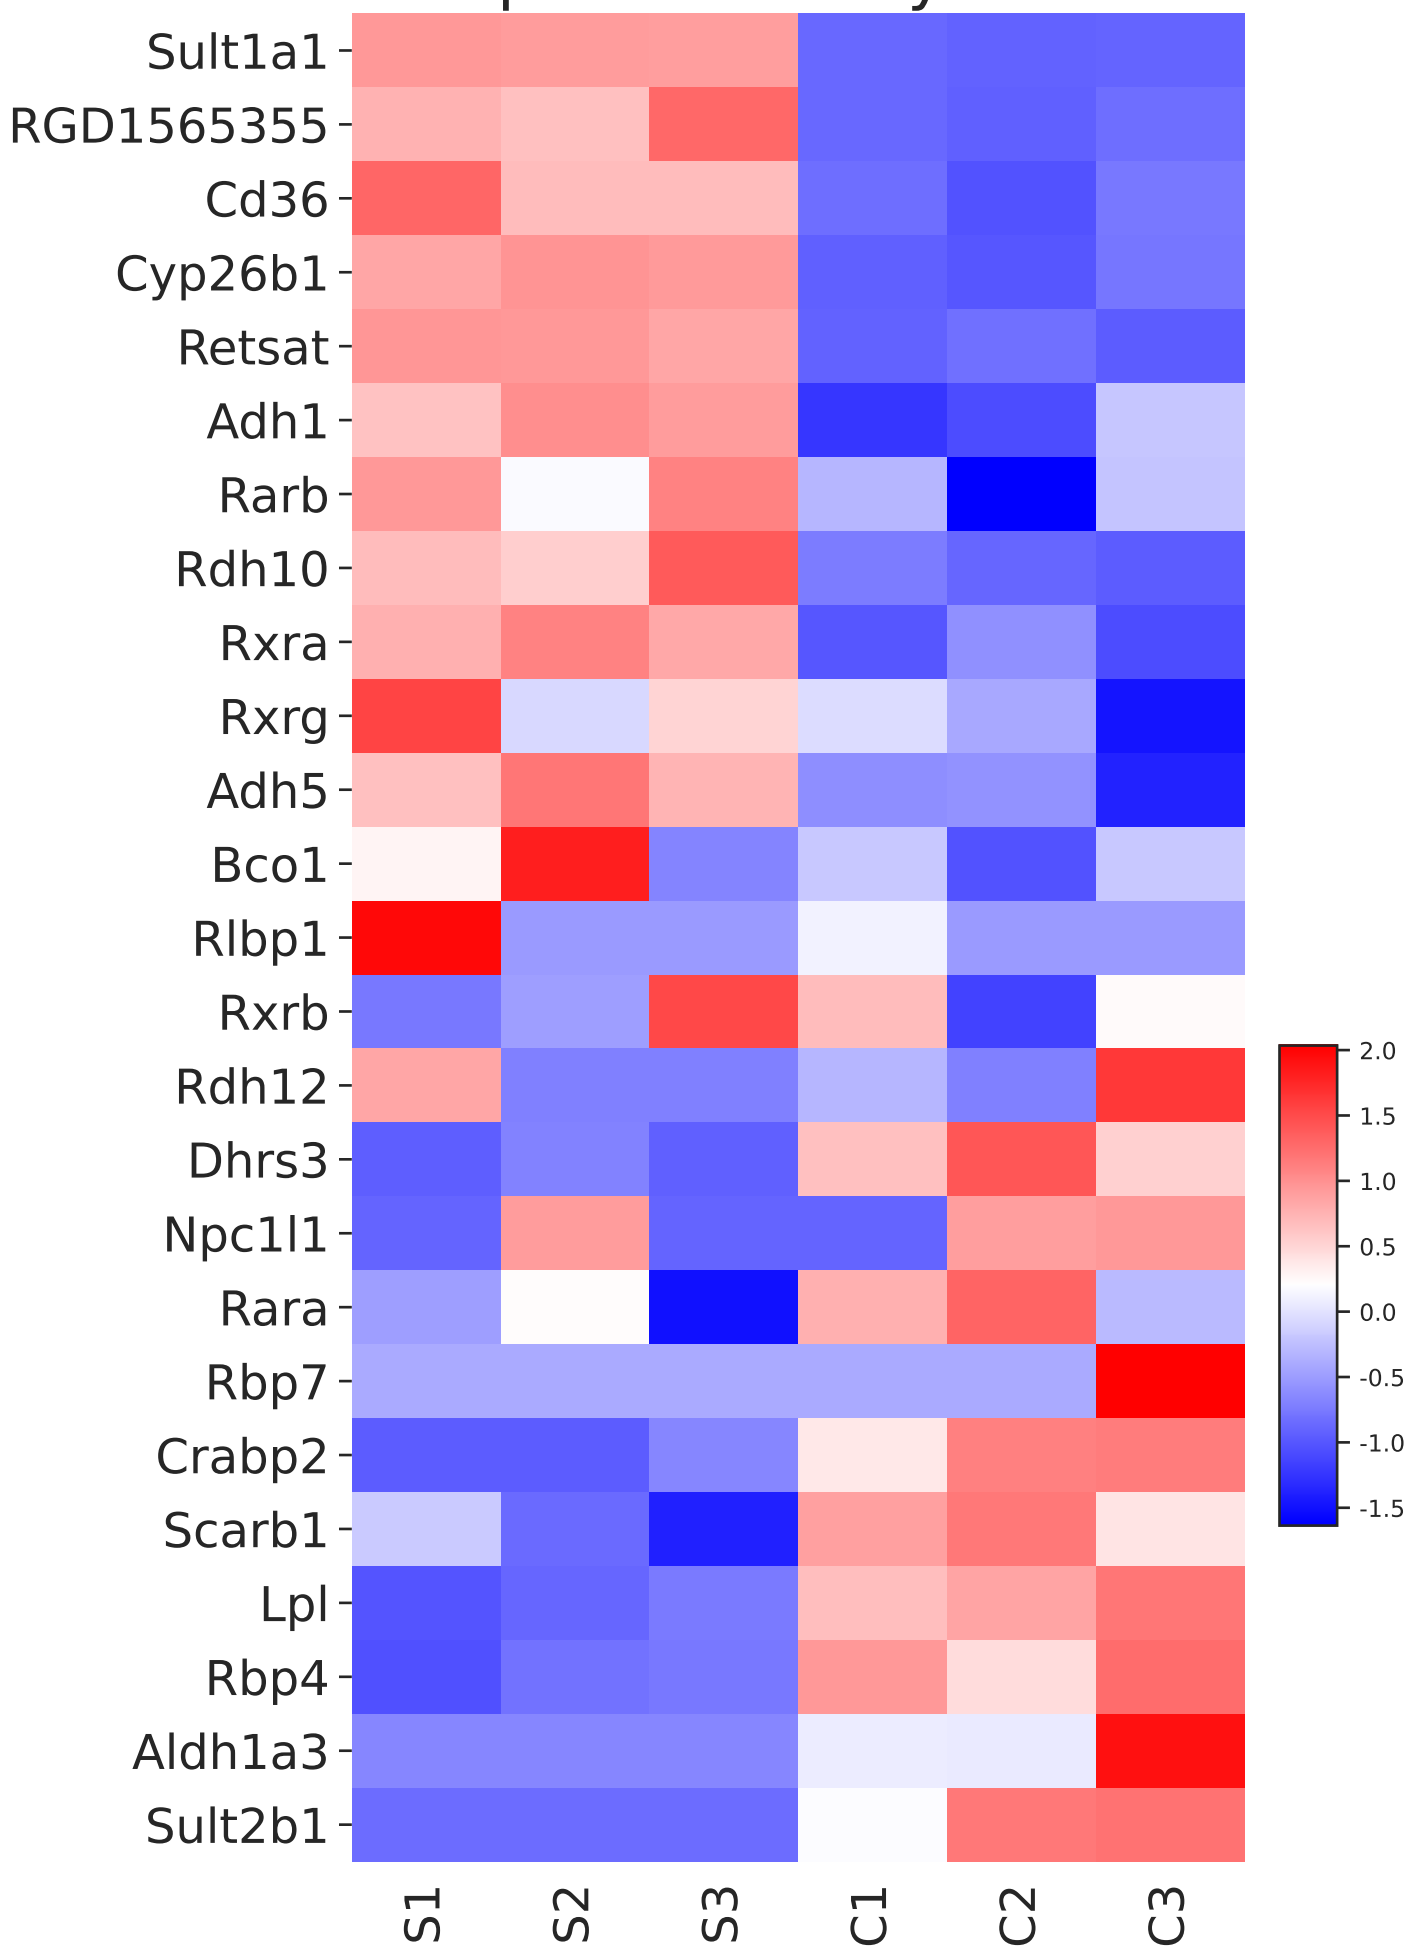

Supplement: Supplementary file 226 [file 6_Retinol metabolism(WP1297).heatmap.pdf › Source data/1.RNA-Seq source data/1.BMSCs/result/1.6.GSEA/S-vs-C/wiki/6_Retinol metabolism(WP1297).heatmap.pdf]

# Toll like receptor signaling pathway(WP1309)

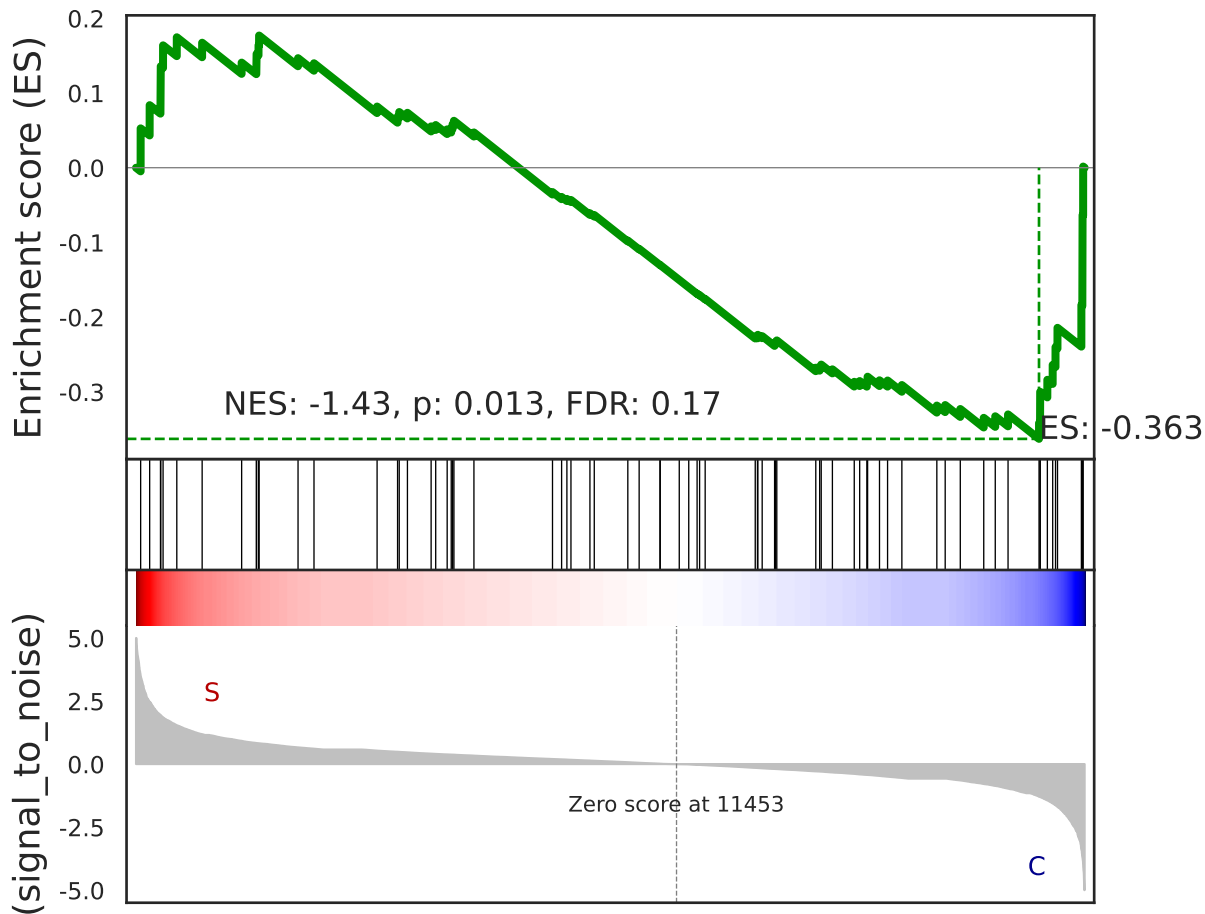

Supplement: Supplementary file 227 [file 75_Toll like receptor signaling pathway(WP1309).gsea.pdf › Source data/1.RNA-Seq source data/1.BMSCs/result/1.6.GSEA/S-vs-C/wiki/75_Toll like receptor signaling pathway(WP1309).gsea.pdf]

# Toll like receptor signaling pathway(WP1309)

## Heatmap of the Analyzed GeneSet

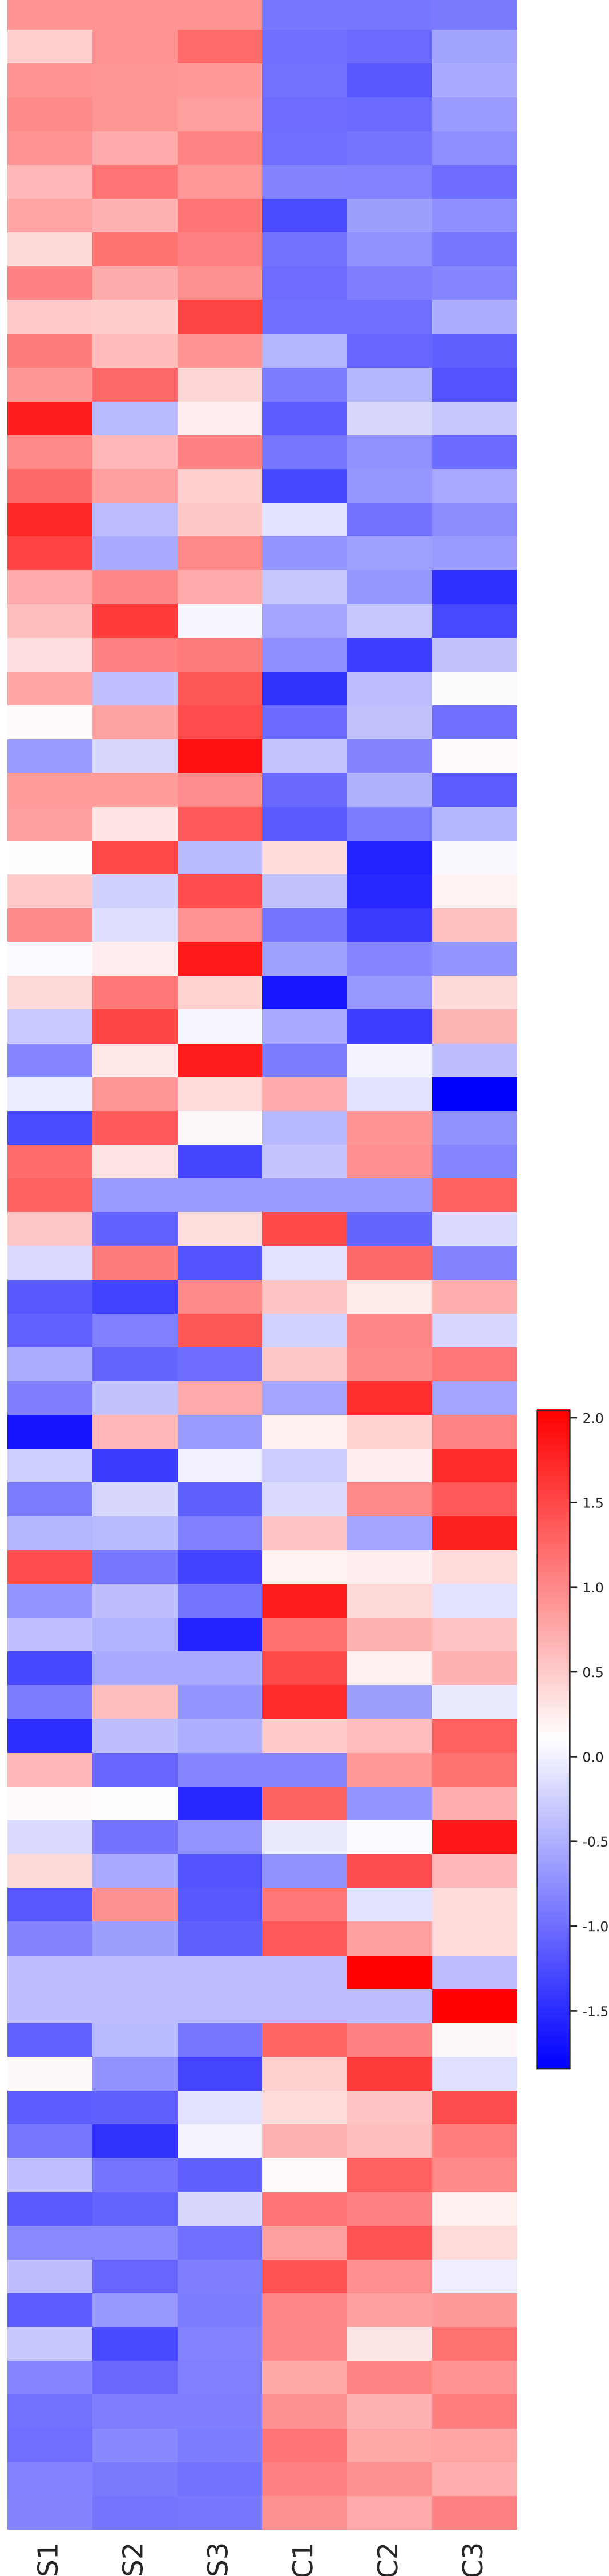

Supplement: Supplementary file 228 [file 75_Toll like receptor signaling pathway(WP1309).heatmap.pdf › Source data/1.RNA-Seq source data/1.BMSCs/result/1.6.GSEA/S-vs-C/wiki/75_Toll like receptor signaling pathway(WP1309).heatmap.pdf]

# Spinal cord injury(WP2433)

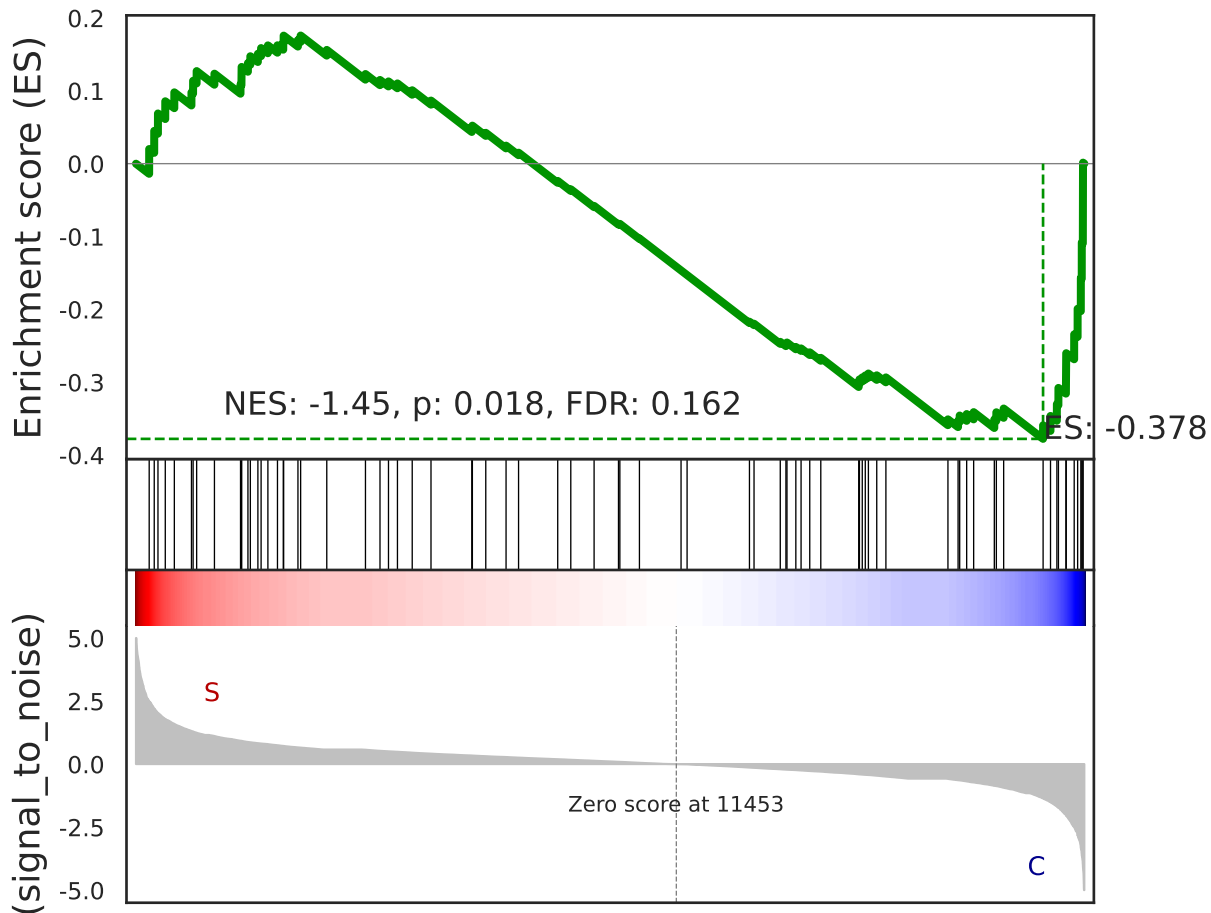

Supplement: Supplementary file 229 [file 76_Spinal cord injury(WP2433).gsea.pdf › Source data/1.RNA-Seq source data/1.BMSCs/result/1.6.GSEA/S-vs-C/wiki/76_Spinal cord injury(WP2433).gsea.pdf]

Spinal cord injury(WP2433)  
Heatmap of the Analyzed GeneSet

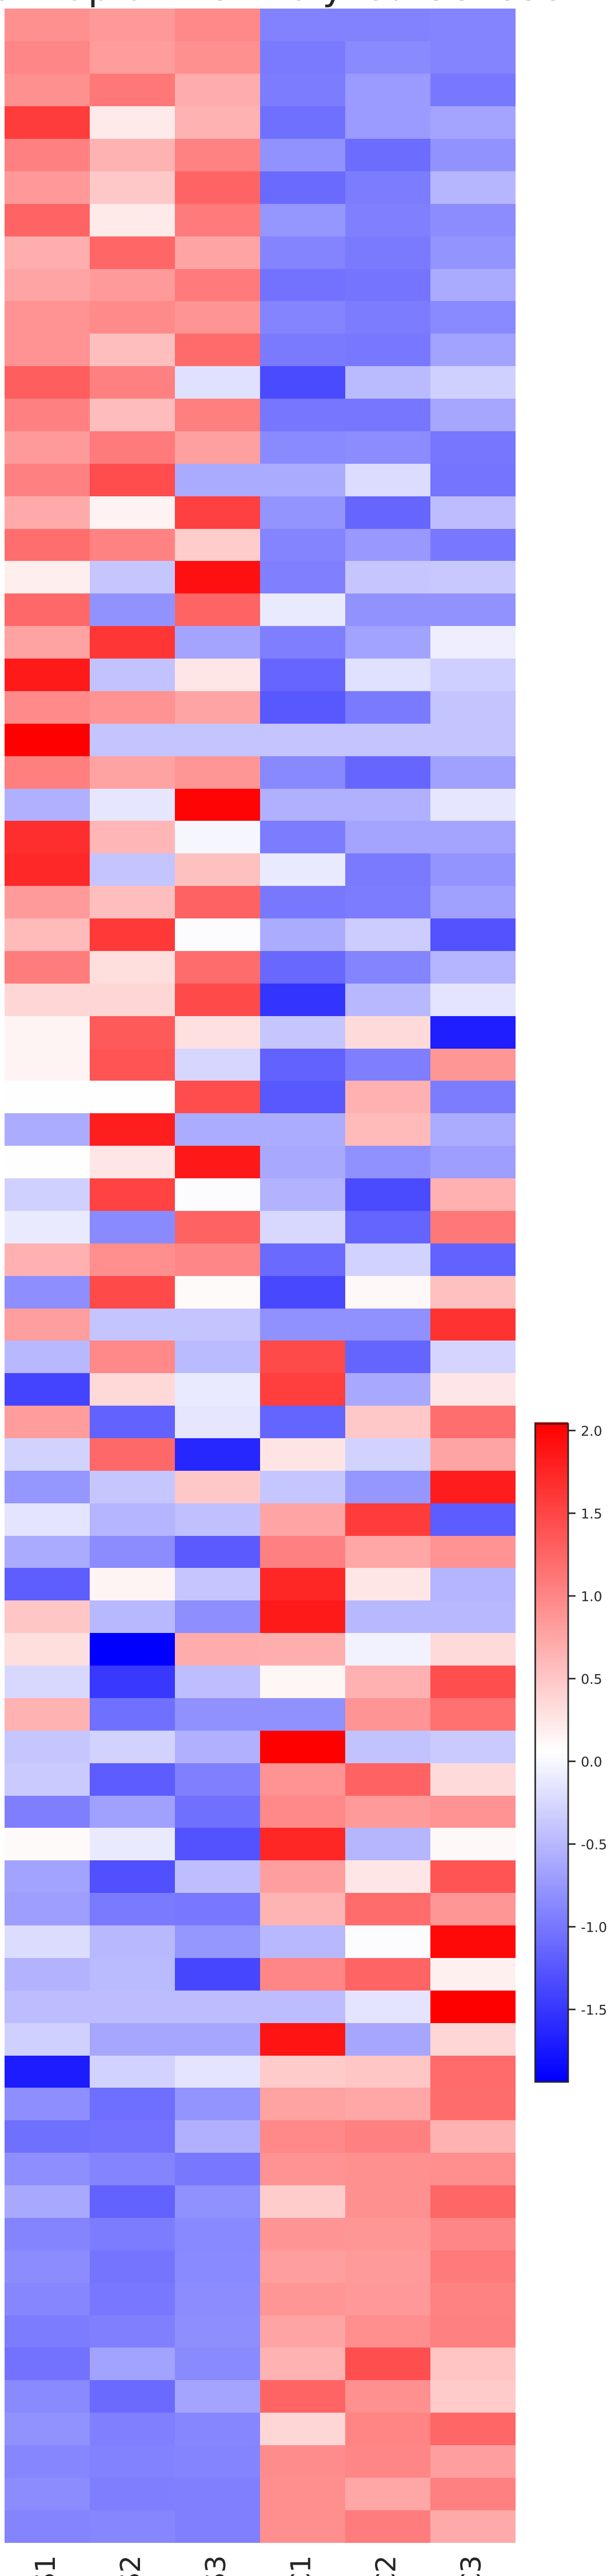

Supplement: Supplementary file 230 [file 76_Spinal cord injury(WP2433).heatmap.pdf › Source data/1.RNA-Seq source data/1.BMSCs/result/1.6.GSEA/S-vs-C/wiki/76_Spinal cord injury(WP2433).heatmap.pdf]

# Focal adhesion(WP188)

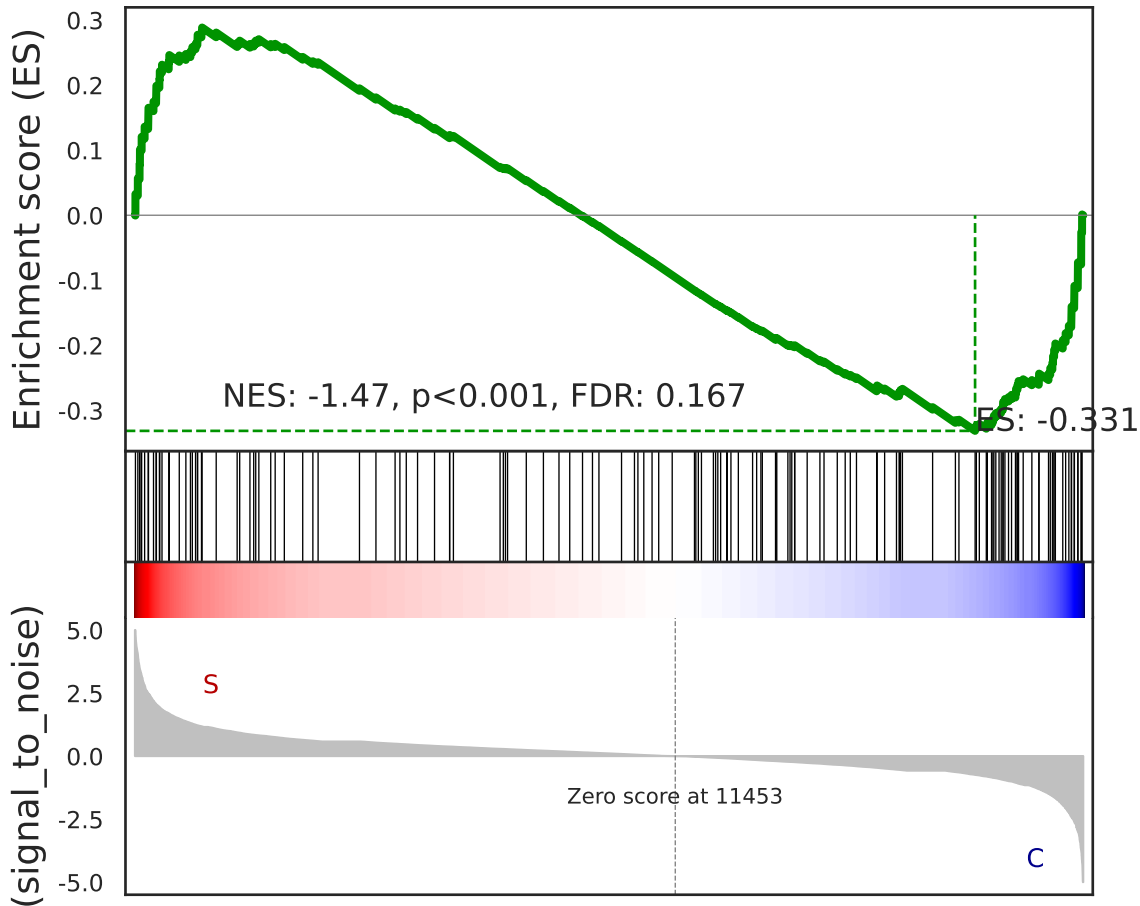

Supplement: Supplementary file 231 [file 77_Focal adhesion(WP188).gsea.pdf › Source data/1.RNA-Seq source data/1.BMSCs/result/1.6.GSEA/S-vs-C/wiki/77_Focal adhesion(WP188).gsea.pdf]

Focal adhesion(WP188)  
Heatmap of the Analyzed GeneSet

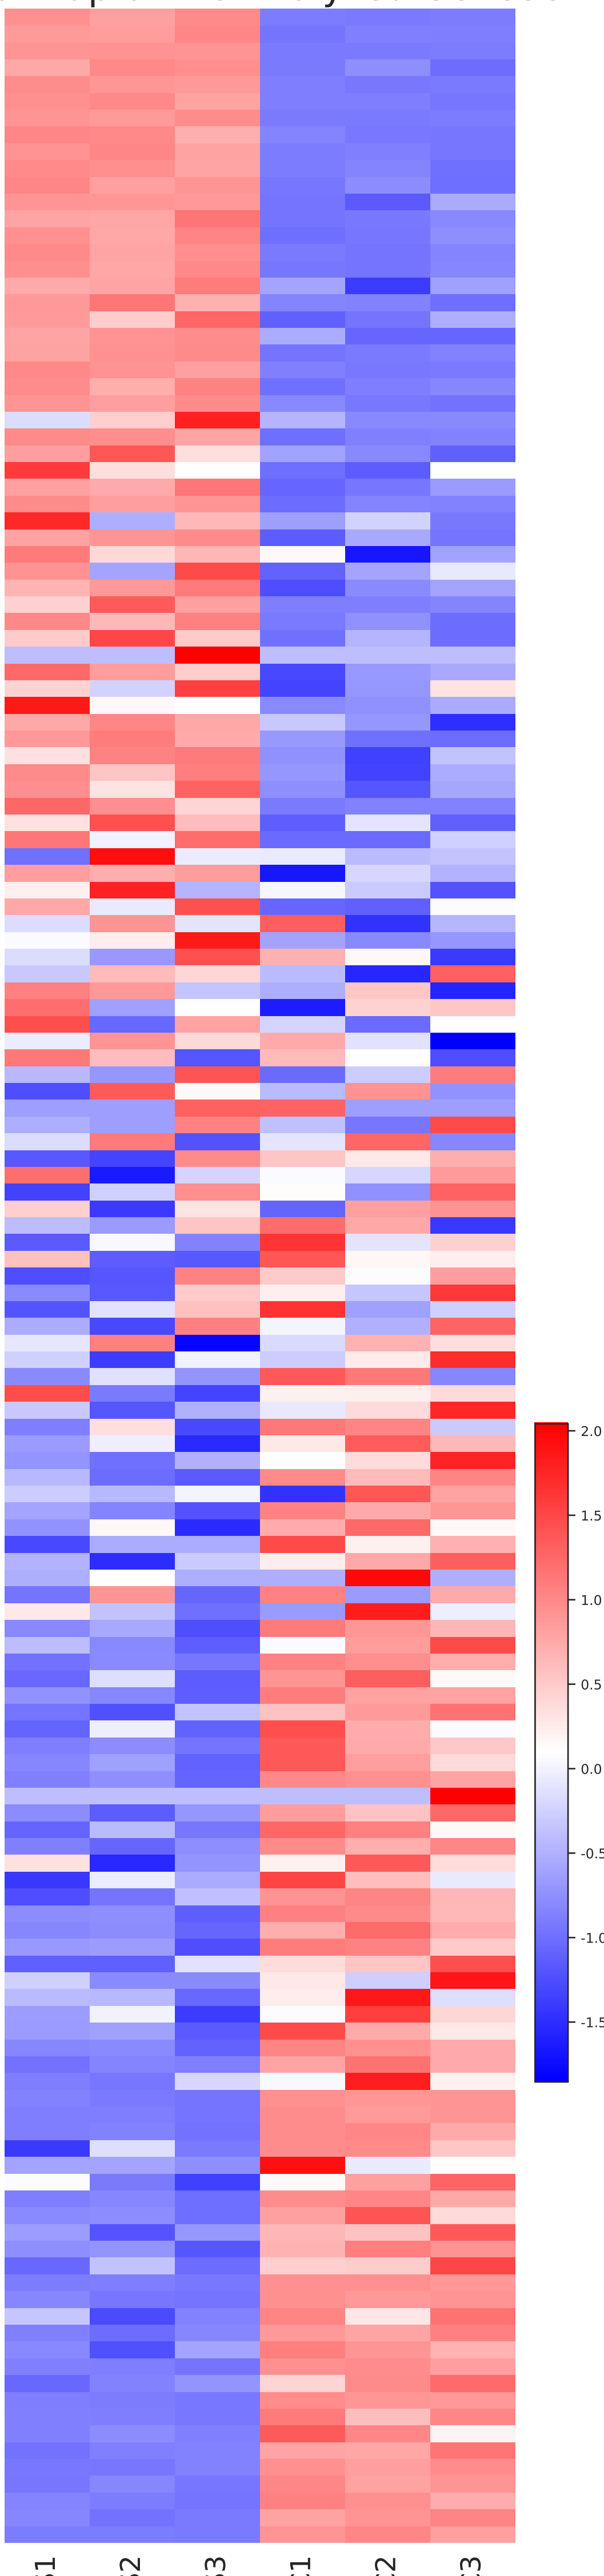

Supplement: Supplementary file 232 [file 77_Focal adhesion(WP188).heatmap.pdf › Source data/1.RNA-Seq source data/1.BMSCs/result/1.6.GSEA/S-vs-C/wiki/77_Focal adhesion(WP188).heatmap.pdf]

# S1P receptor signal transduction(WP1312)

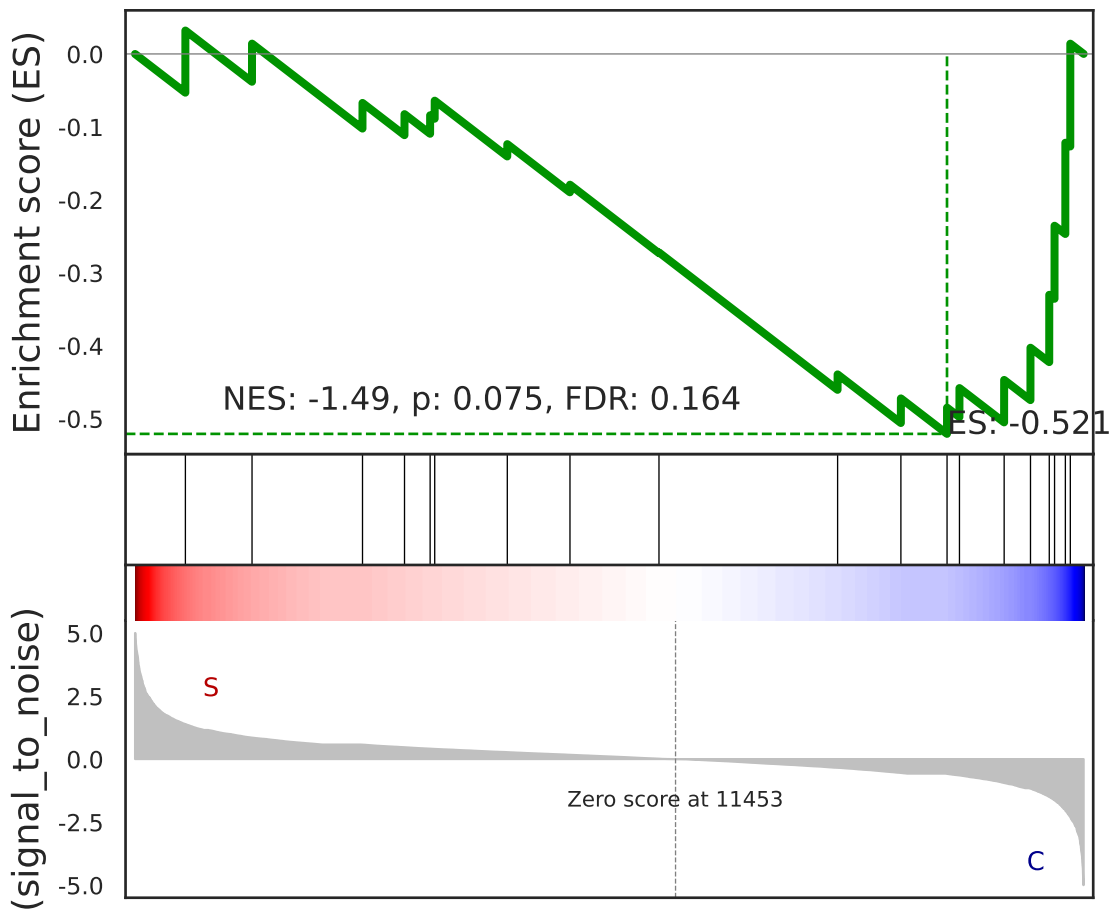

Supplement: Supplementary file 233 [file 78_S1P receptor signal transduction(WP1312).gsea.pdf › Source data/1.RNA-Seq source data/1.BMSCs/result/1.6.GSEA/S-vs-C/wiki/78_S1P receptor signal transduction(WP1312).gsea.pdf]

# S1P receptor signal transduction(WP1312)

## Heatmap of the Analyzed GeneSet

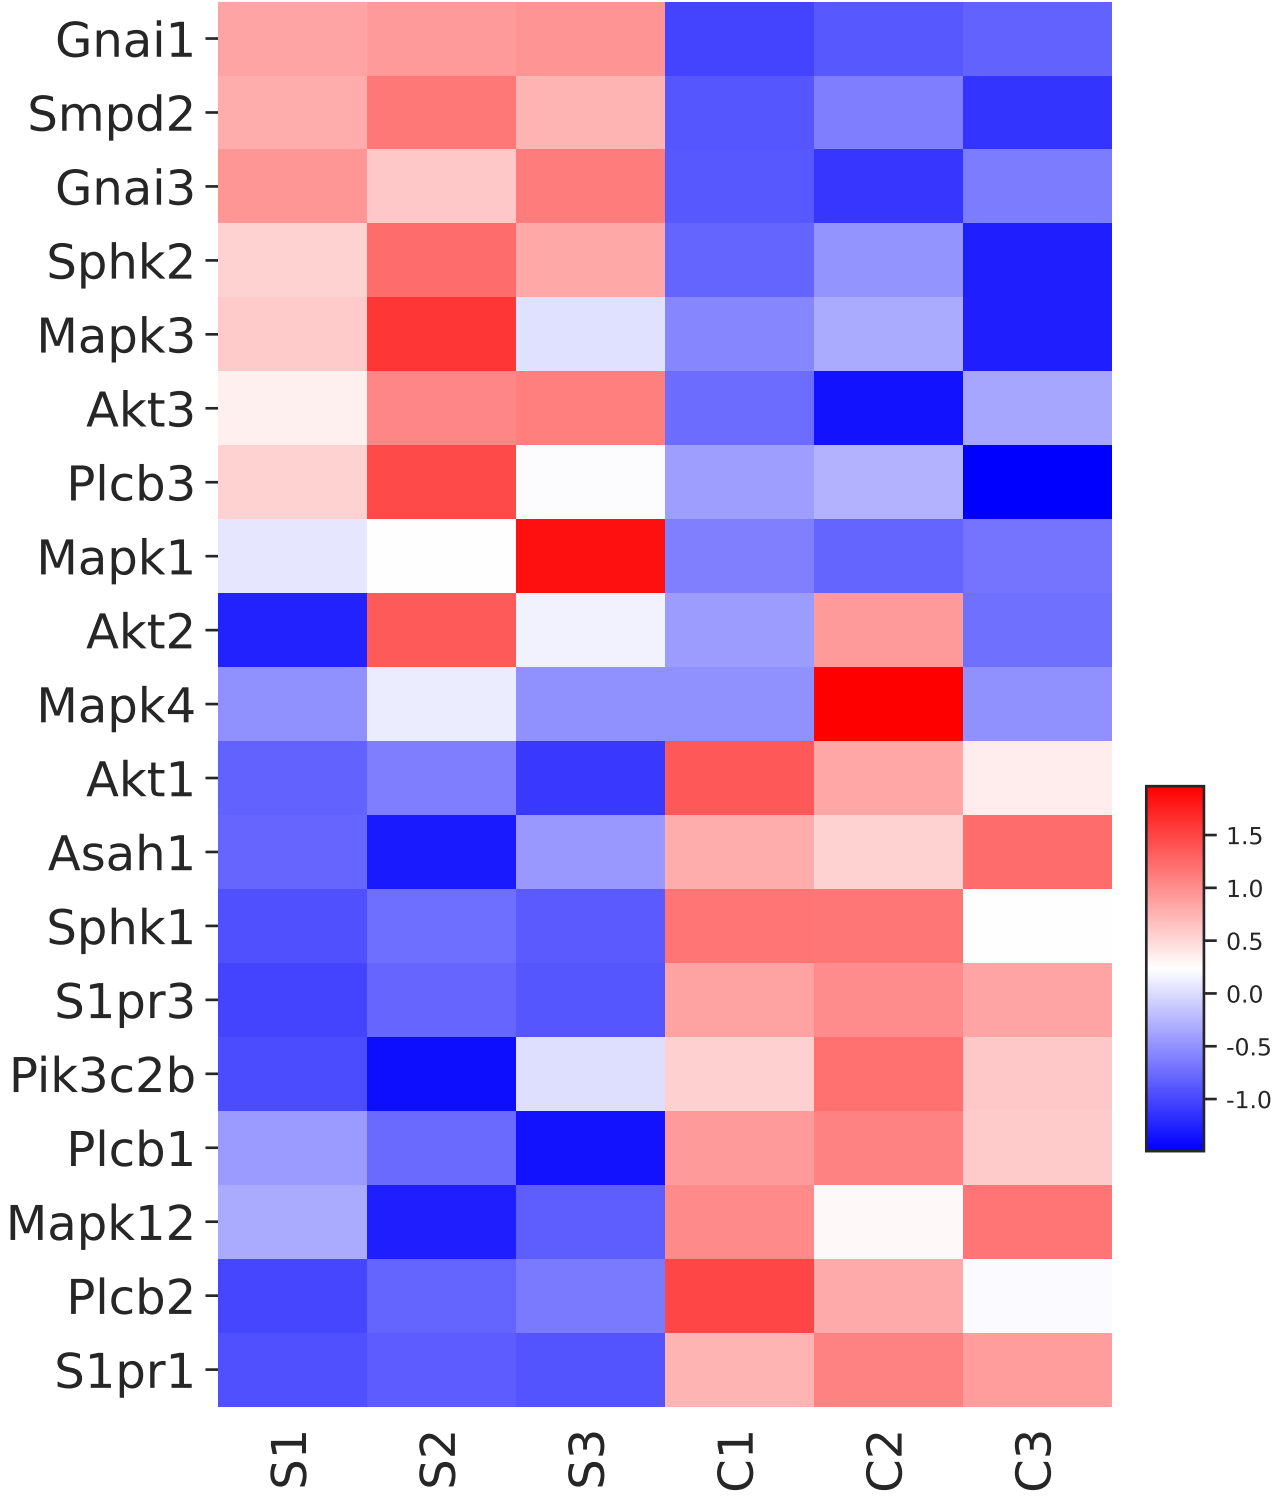

Supplement: Supplementary file 234 [file 78_S1P receptor signal transduction(WP1312).heatmap.pdf › Source data/1.RNA-Seq source data/1.BMSCs/result/1.6.GSEA/S-vs-C/wiki/78_S1P receptor signal transduction(WP1312).heatmap.pdf]

# Burn wound healing(WP5057)

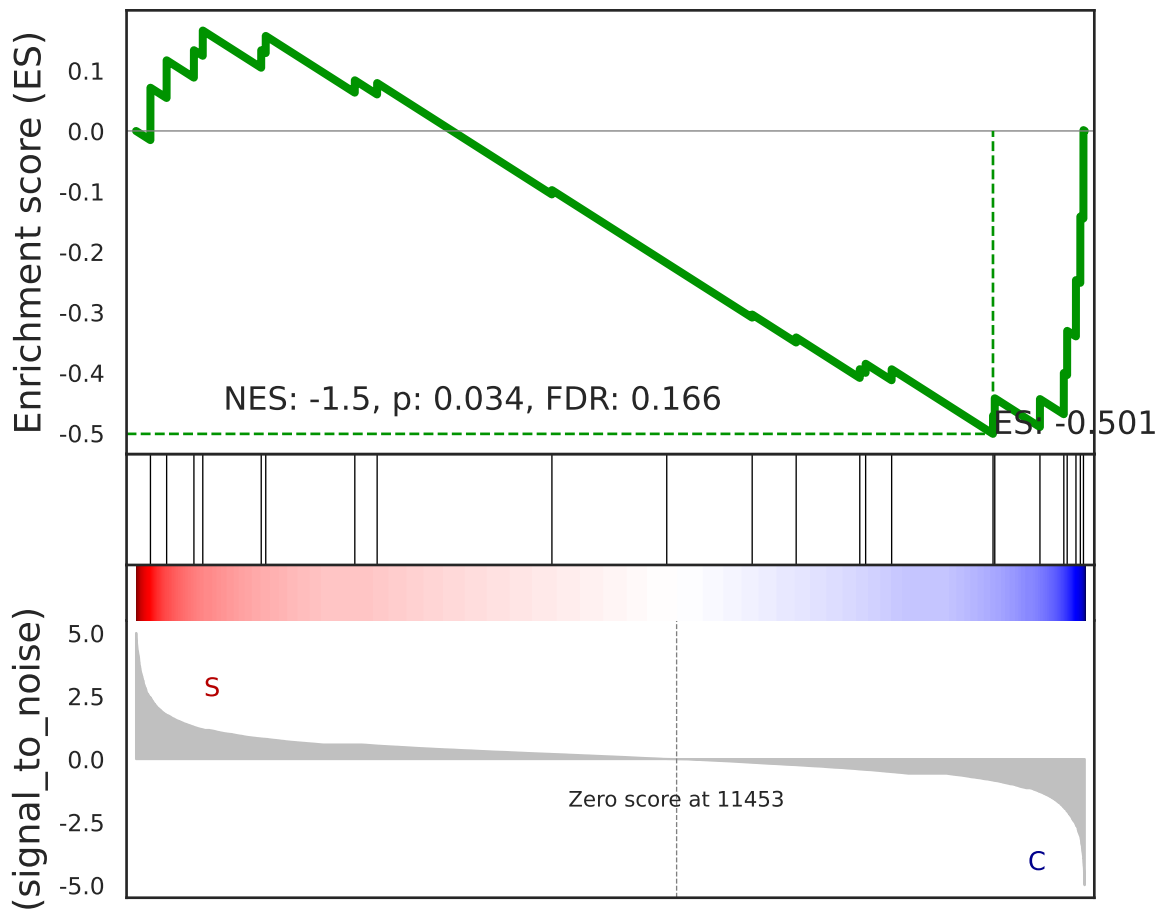

Supplement: Supplementary file 235 [file 79_Burn wound healing(WP5057).gsea.pdf › Source data/1.RNA-Seq source data/1.BMSCs/result/1.6.GSEA/S-vs-C/wiki/79_Burn wound healing(WP5057).gsea.pdf]

Burn wound healing(WP5057)  
Heatmap of the Analyzed GeneSet

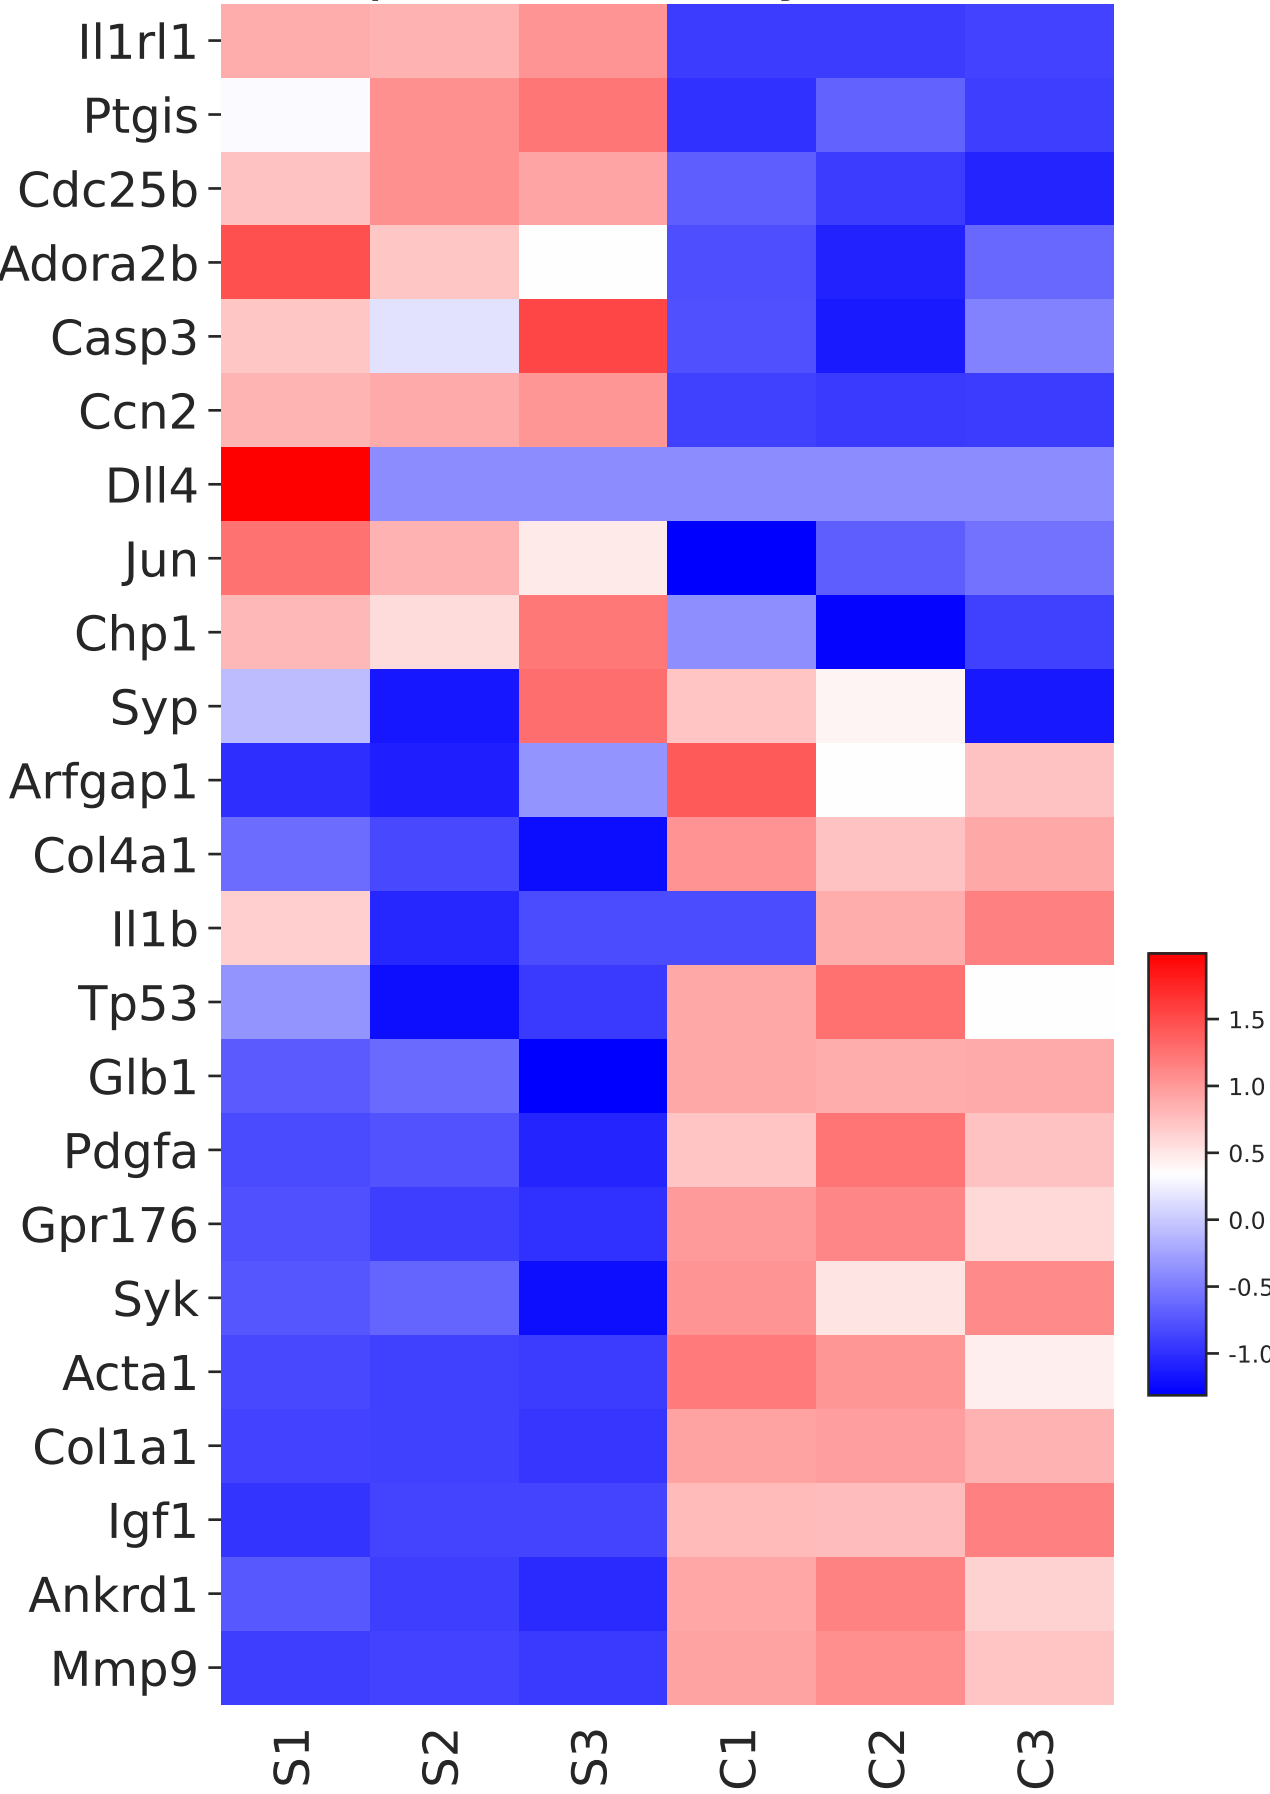

Supplement: Supplementary file 236 [file 79_Burn wound healing(WP5057).heatmap.pdf › Source data/1.RNA-Seq source data/1.BMSCs/result/1.6.GSEA/S-vs-C/wiki/79_Burn wound healing(WP5057).heatmap.pdf]

# Oxidative stress response(WP173)

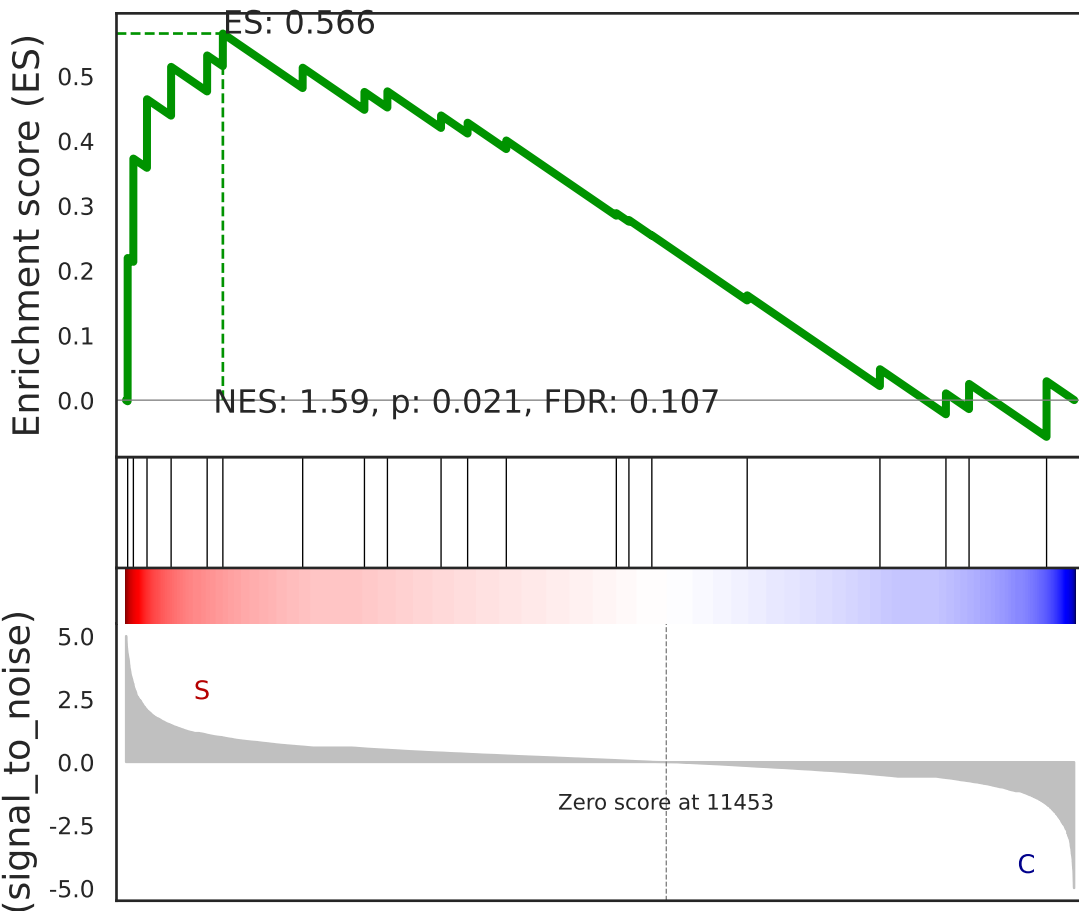

Supplement: Supplementary file 237 [file 7_Oxidative stress response(WP173).gsea.pdf › Source data/1.RNA-Seq source data/1.BMSCs/result/1.6.GSEA/S-vs-C/wiki/7_Oxidative stress response(WP173).gsea.pdf]

# Oxidative stress response(WP173)

## Heatmap of the Analyzed GeneSet

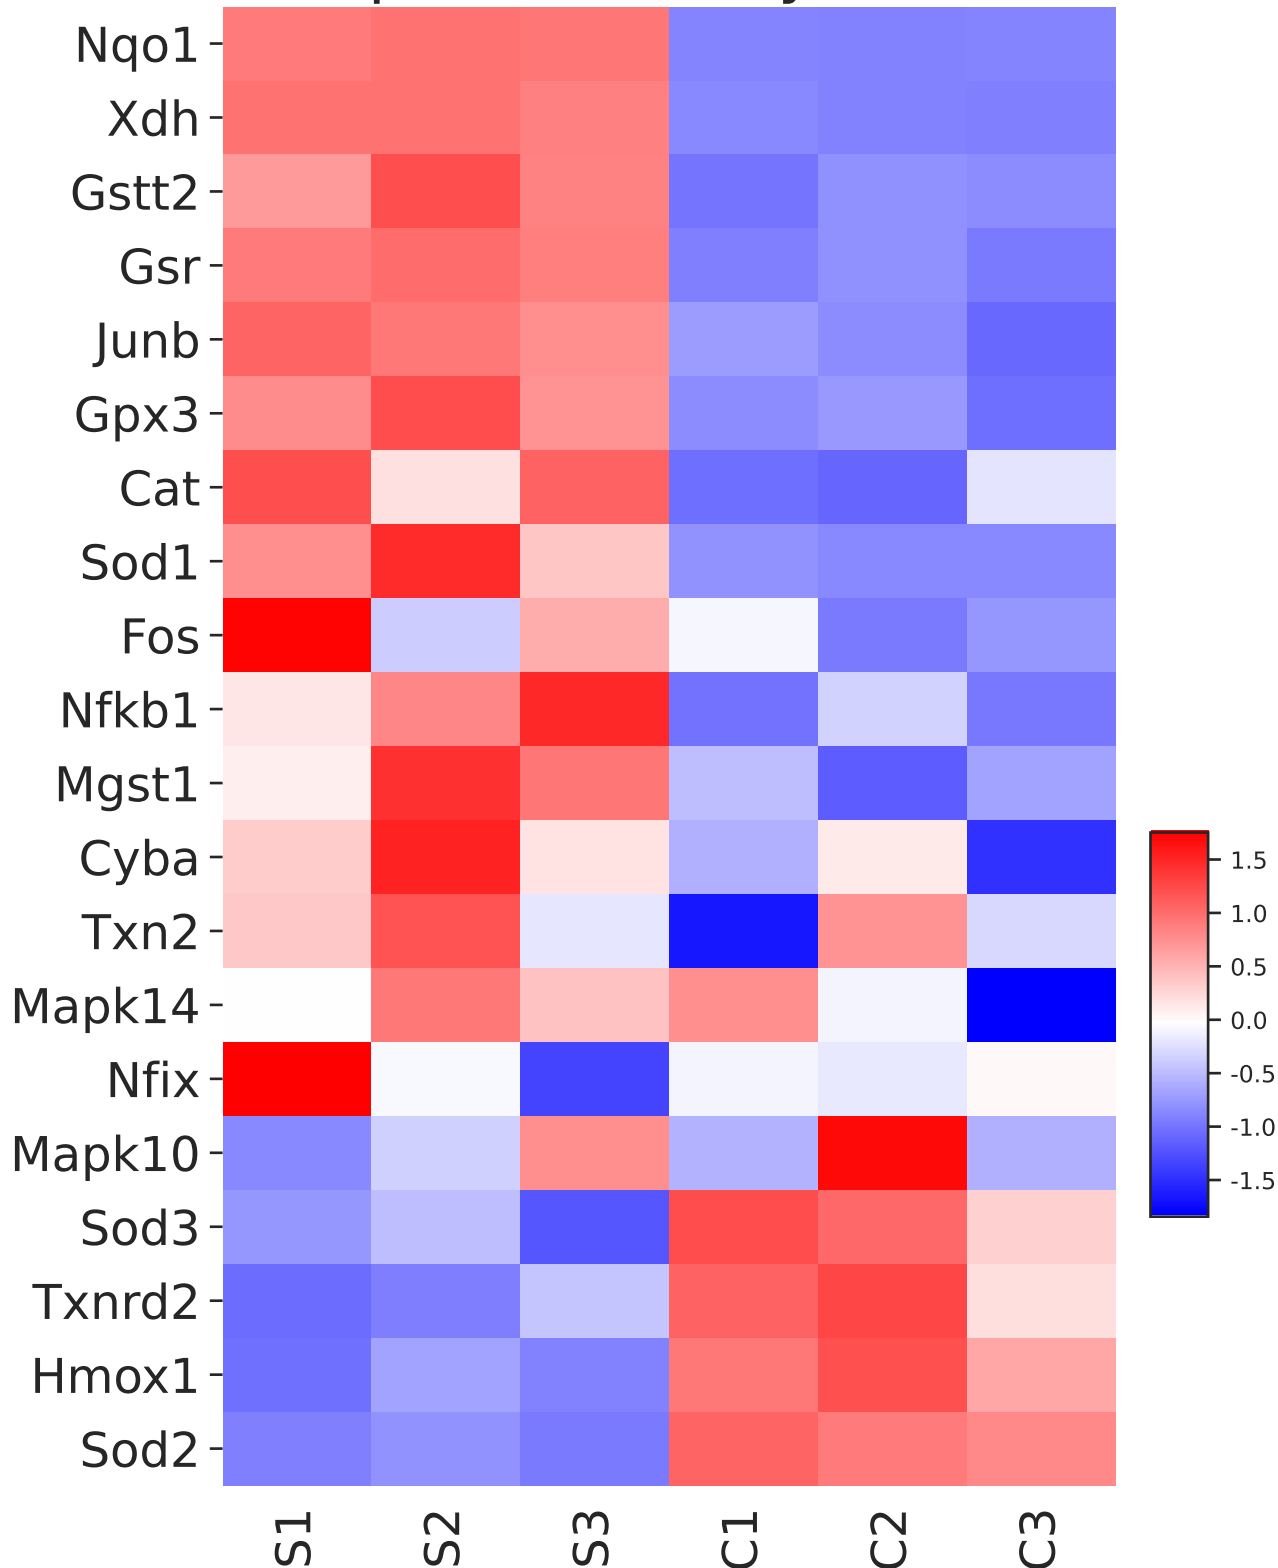

Supplement: Supplementary file 238 [file 7_Oxidative stress response(WP173).heatmap.pdf › Source data/1.RNA-Seq source data/1.BMSCs/result/1.6.GSEA/S-vs-C/wiki/7_Oxidative stress response(WP173).heatmap.pdf]

# Myometrial relaxation and contraction pathways(WP140)

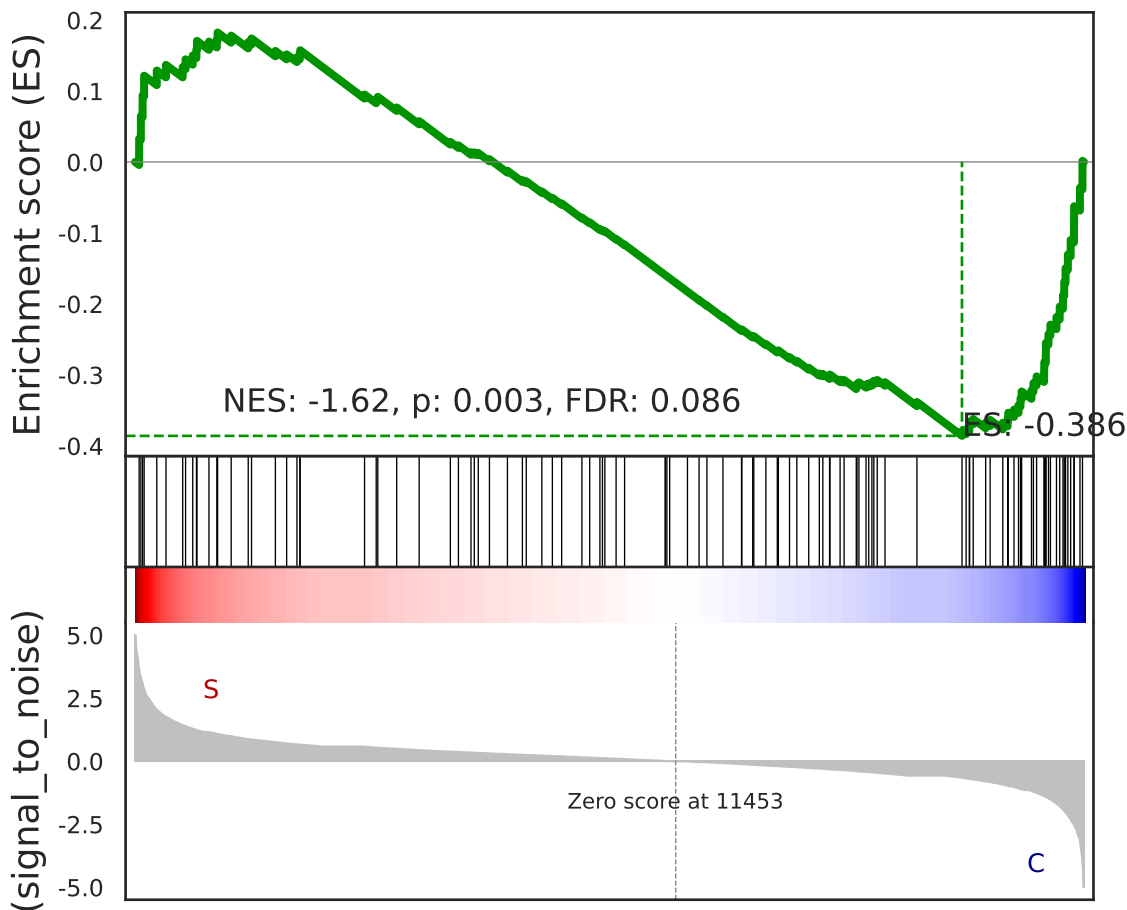

Supplement: Supplementary file 239 [file 80_Myometrial relaxation and contraction pathways(WP140).gsea.pdf › Source data/1.RNA-Seq source data/1.BMSCs/result/1.6.GSEA/S-vs-C/wiki/80_Myometrial relaxation and contraction pathways(WP140).gsea.pdf]

# Myometrial relaxation and contraction pathways(WP140)

## Heatmap of the Analyzed GeneSet

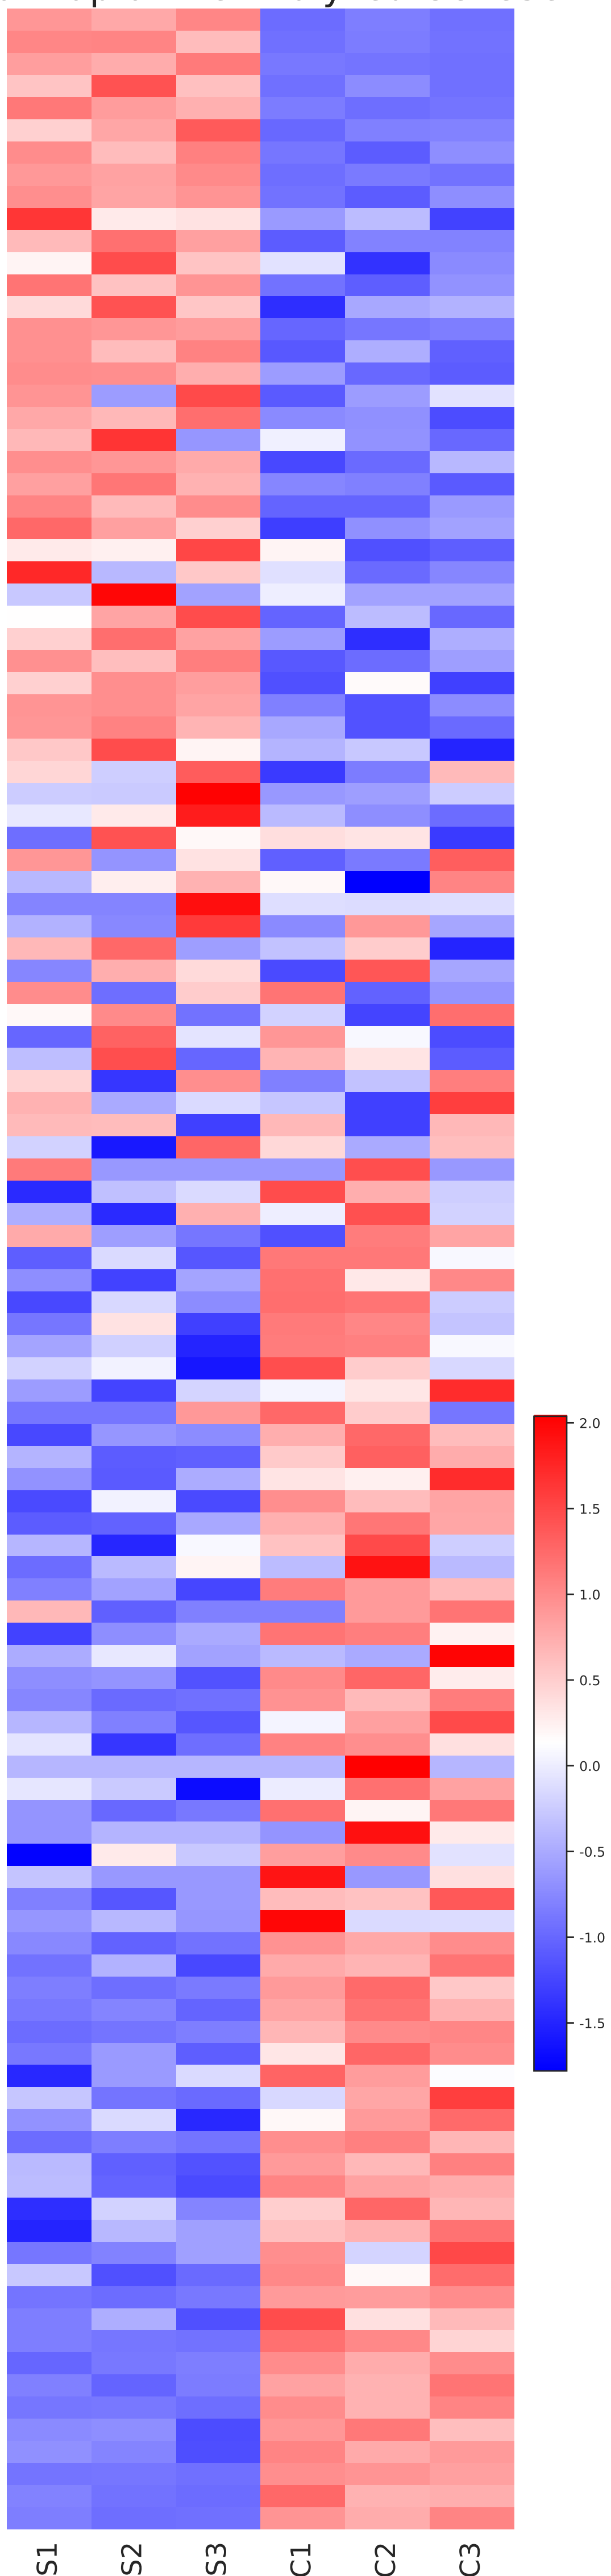

Supplement: Supplementary file 240 [file 80_Myometrial relaxation and contraction pathways(WP140).heatmap.pdf › Source data/1.RNA-Seq source data/1.BMSCs/result/1.6.GSEA/S-vs-C/wiki/80_Myometrial relaxation and contraction pathways(WP140).heatmap.pdf]

# Matrix metalloproteinases(WP278)

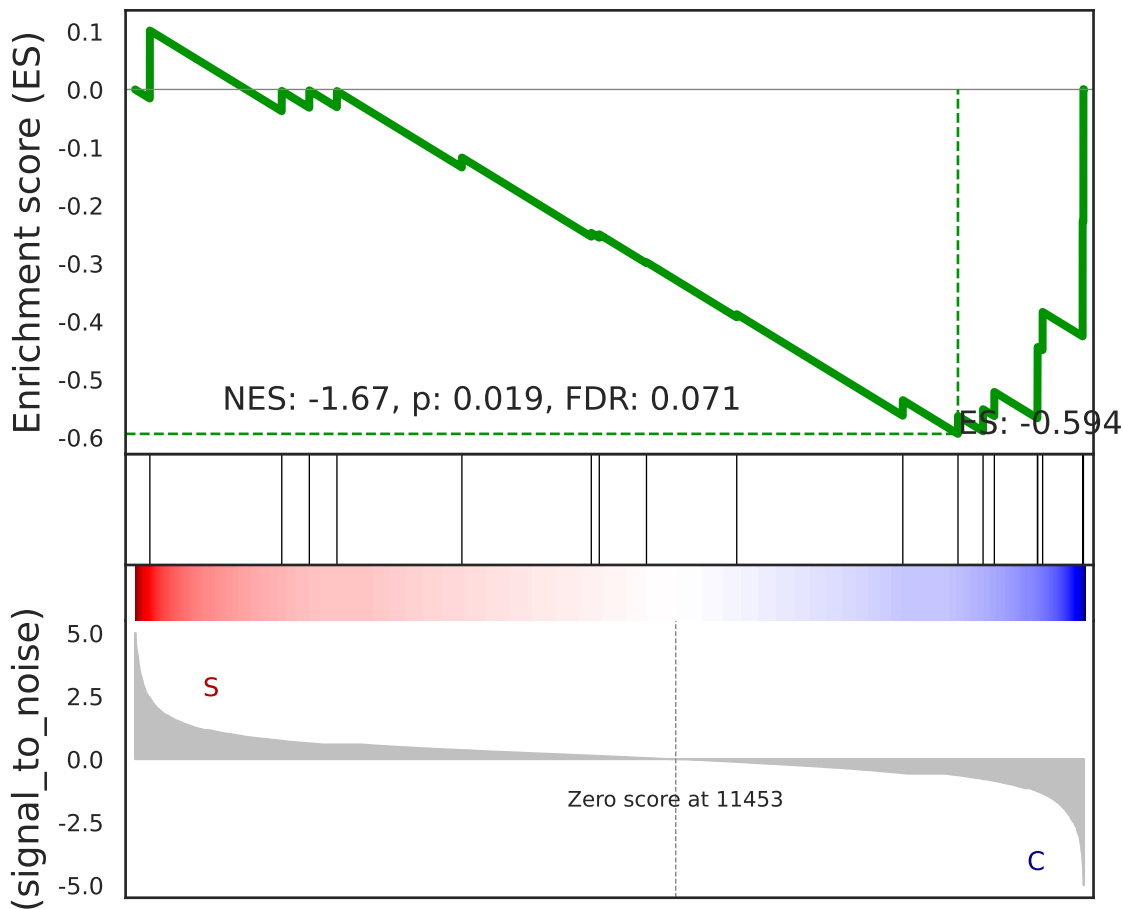

Supplement: Supplementary file 241 [file 81_Matrix metalloproteinases(WP278).gsea.pdf › Source data/1.RNA-Seq source data/1.BMSCs/result/1.6.GSEA/S-vs-C/wiki/81_Matrix metalloproteinases(WP278).gsea.pdf]

# Matrix metalloproteinases(WP278)

## Heatmap of the Analyzed GeneSet

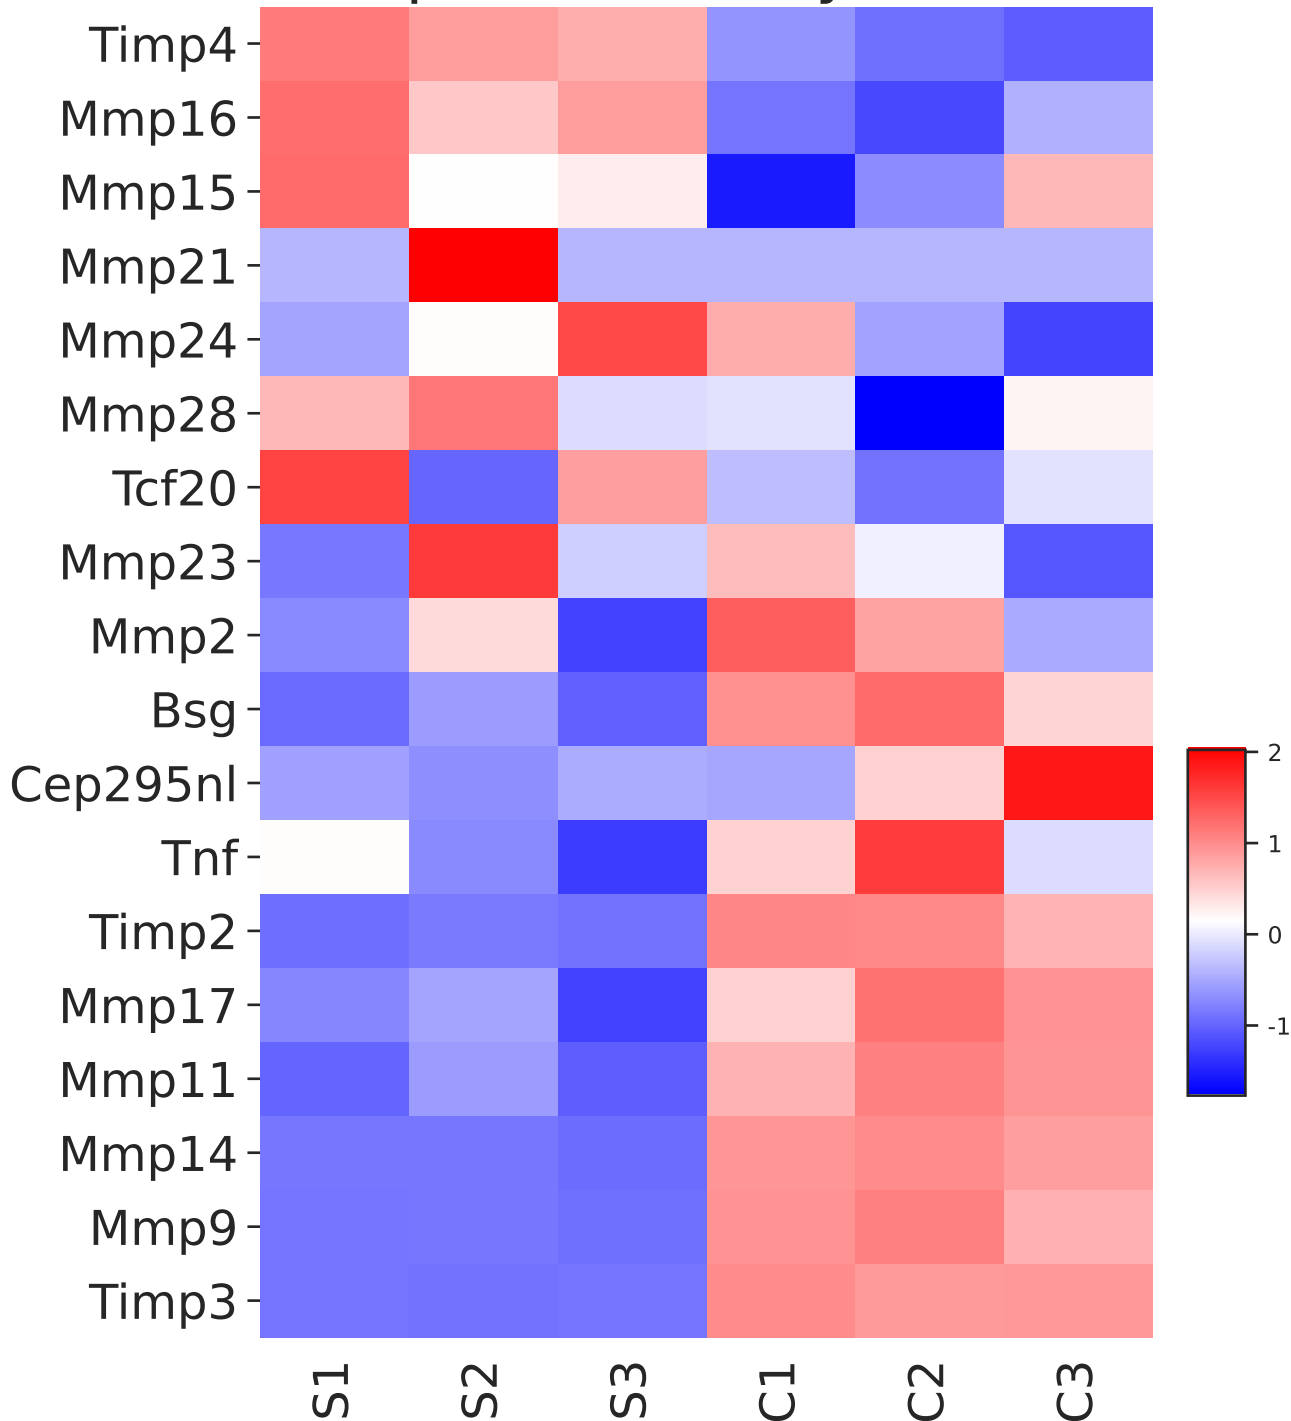

Supplement: Supplementary file 242 [file 81_Matrix metalloproteinases(WP278).heatmap.pdf › Source data/1.RNA-Seq source data/1.BMSCs/result/1.6.GSEA/S-vs-C/wiki/81_Matrix metalloproteinases(WP278).heatmap.pdf]

# IL 5 signaling pathway(WP44)

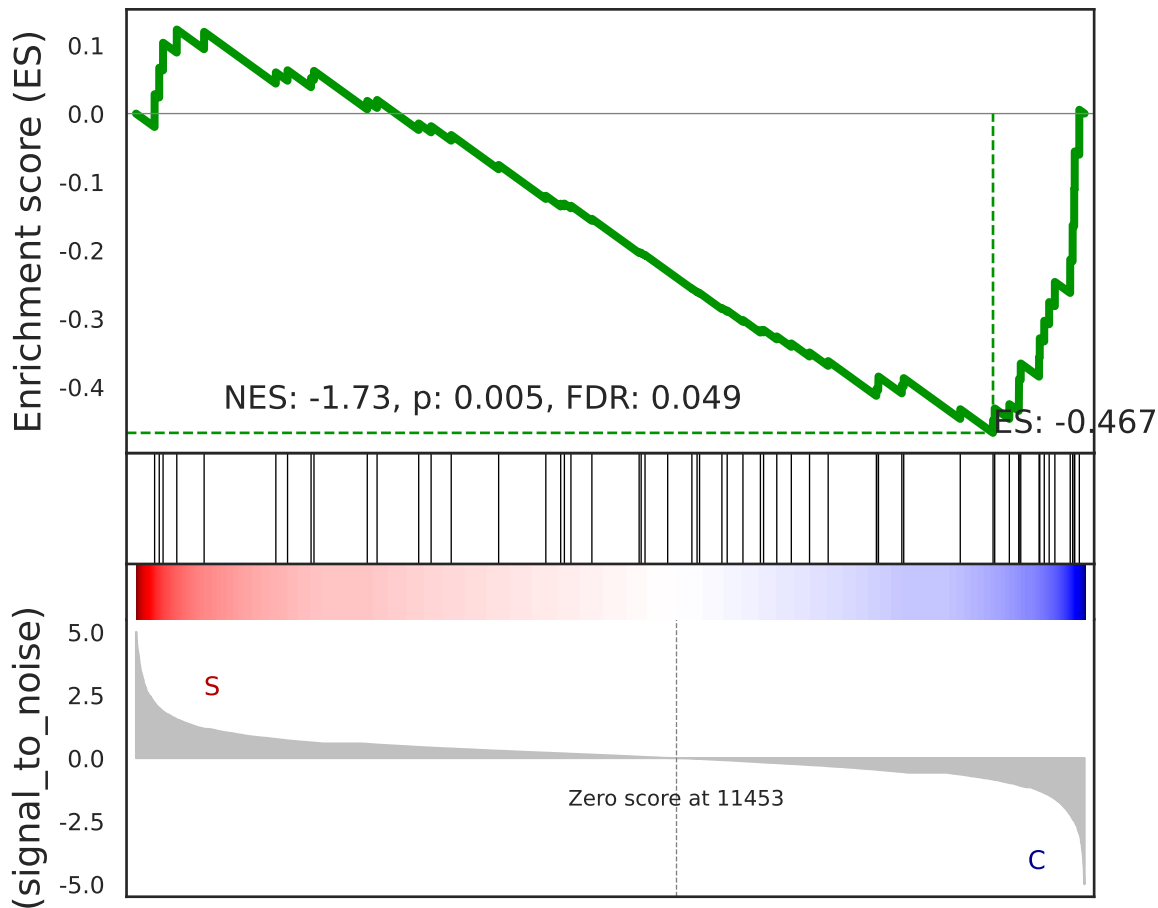

Supplement: Supplementary file 243 [file 82_IL 5 signaling pathway(WP44).gsea.pdf › Source data/1.RNA-Seq source data/1.BMSCs/result/1.6.GSEA/S-vs-C/wiki/82_IL 5 signaling pathway(WP44).gsea.pdf]

IL 5 signaling pathway(WP44)  
Heatmap of the Analyzed GeneSet

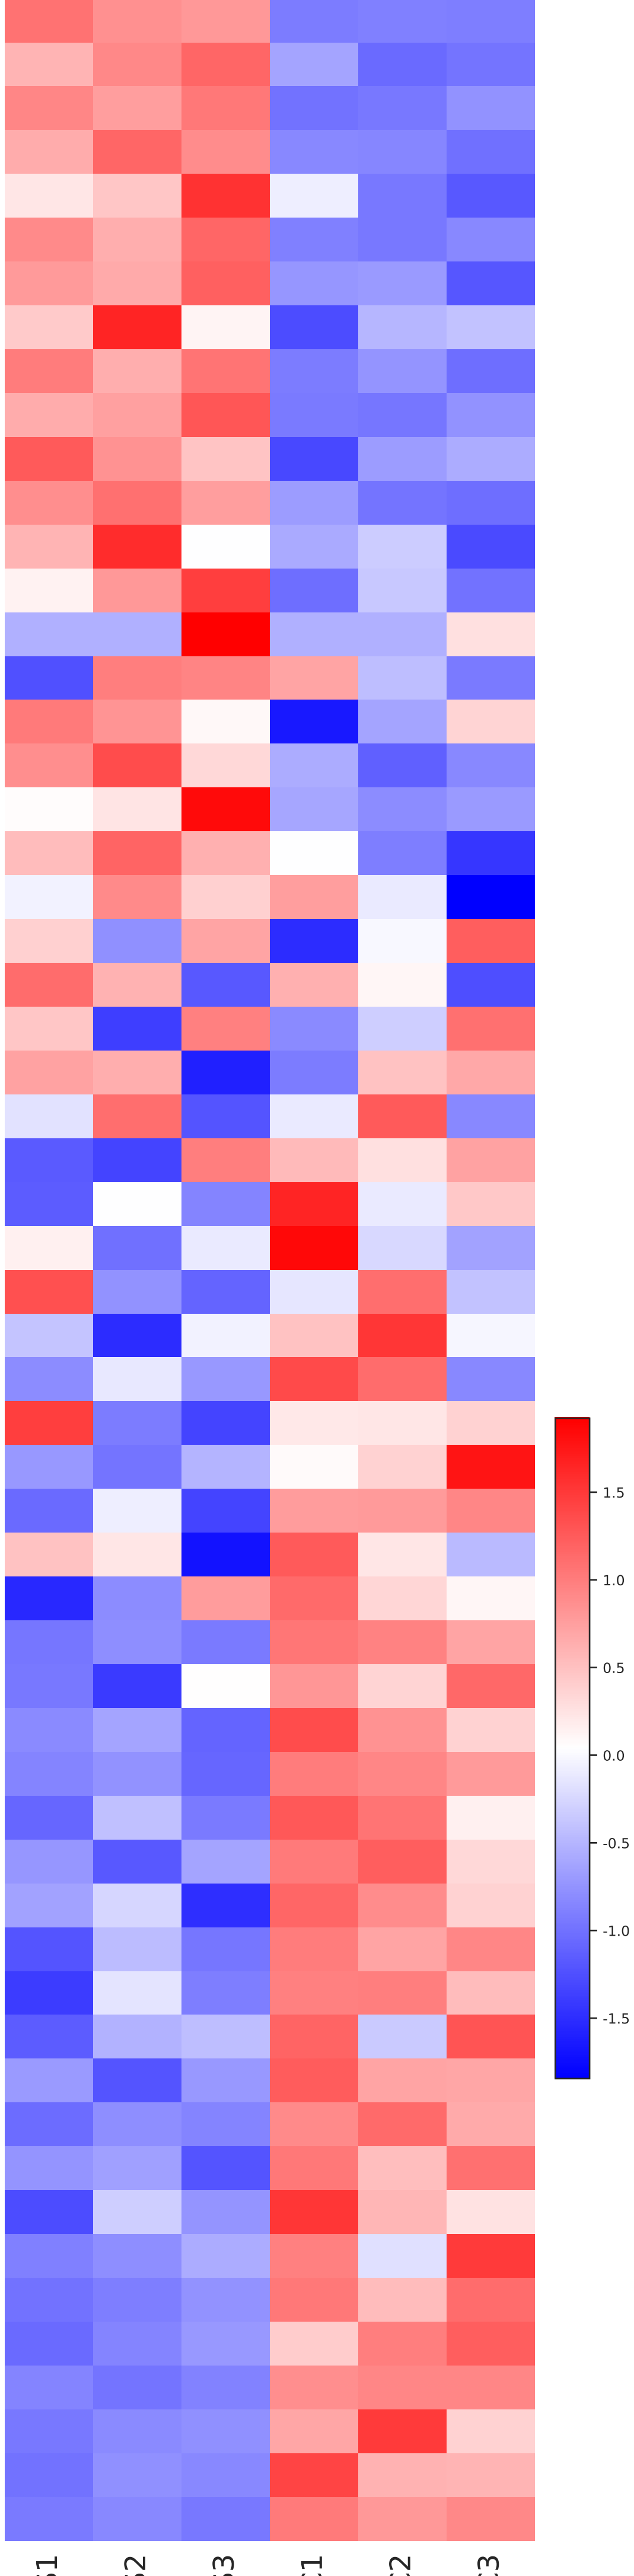

Supplement: Supplementary file 244 [file 82_IL 5 signaling pathway(WP44).heatmap.pdf › Source data/1.RNA-Seq source data/1.BMSCs/result/1.6.GSEA/S-vs-C/wiki/82_IL 5 signaling pathway(WP44).heatmap.pdf]

# Striated muscle contraction(WP316)

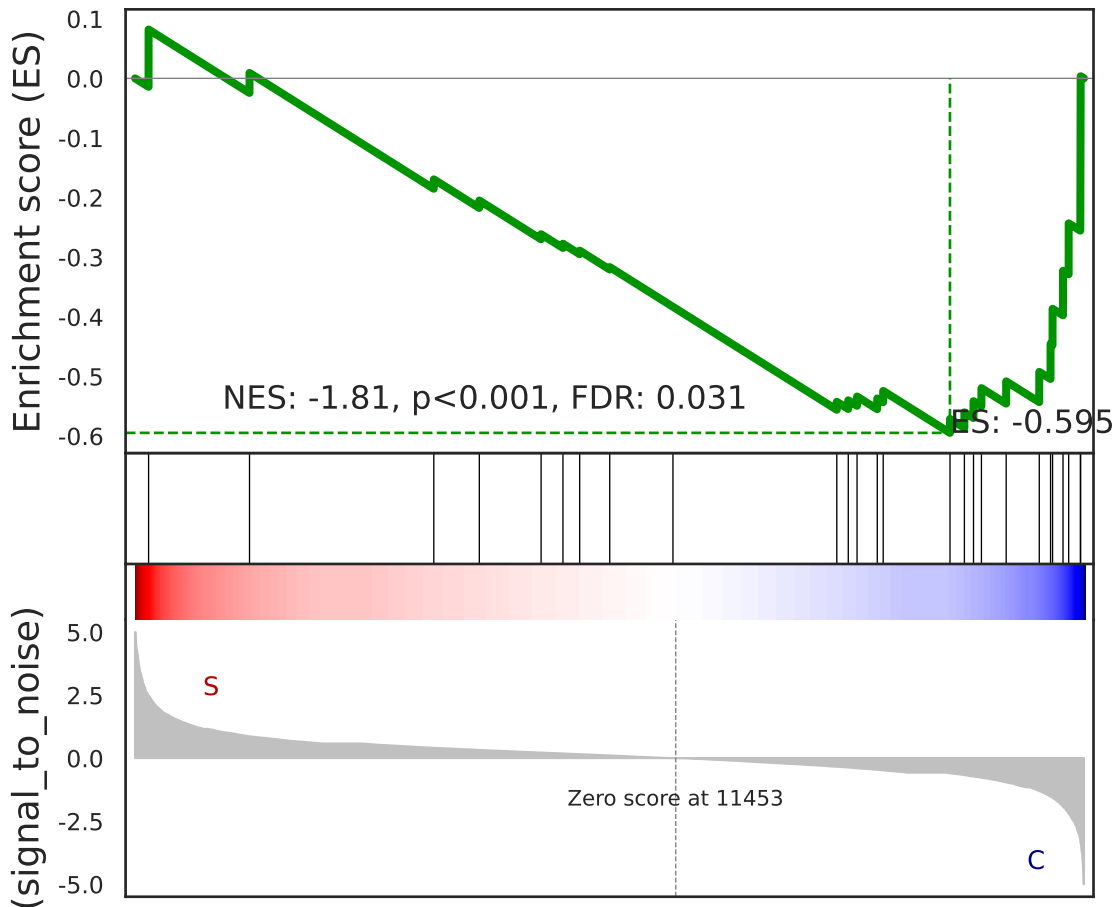

Supplement: Supplementary file 245 [file 83_Striated muscle contraction(WP316).gsea.pdf › Source data/1.RNA-Seq source data/1.BMSCs/result/1.6.GSEA/S-vs-C/wiki/83_Striated muscle contraction(WP316).gsea.pdf]

Striated muscle contraction(WP316)  
Heatmap of the Analyzed GeneSet

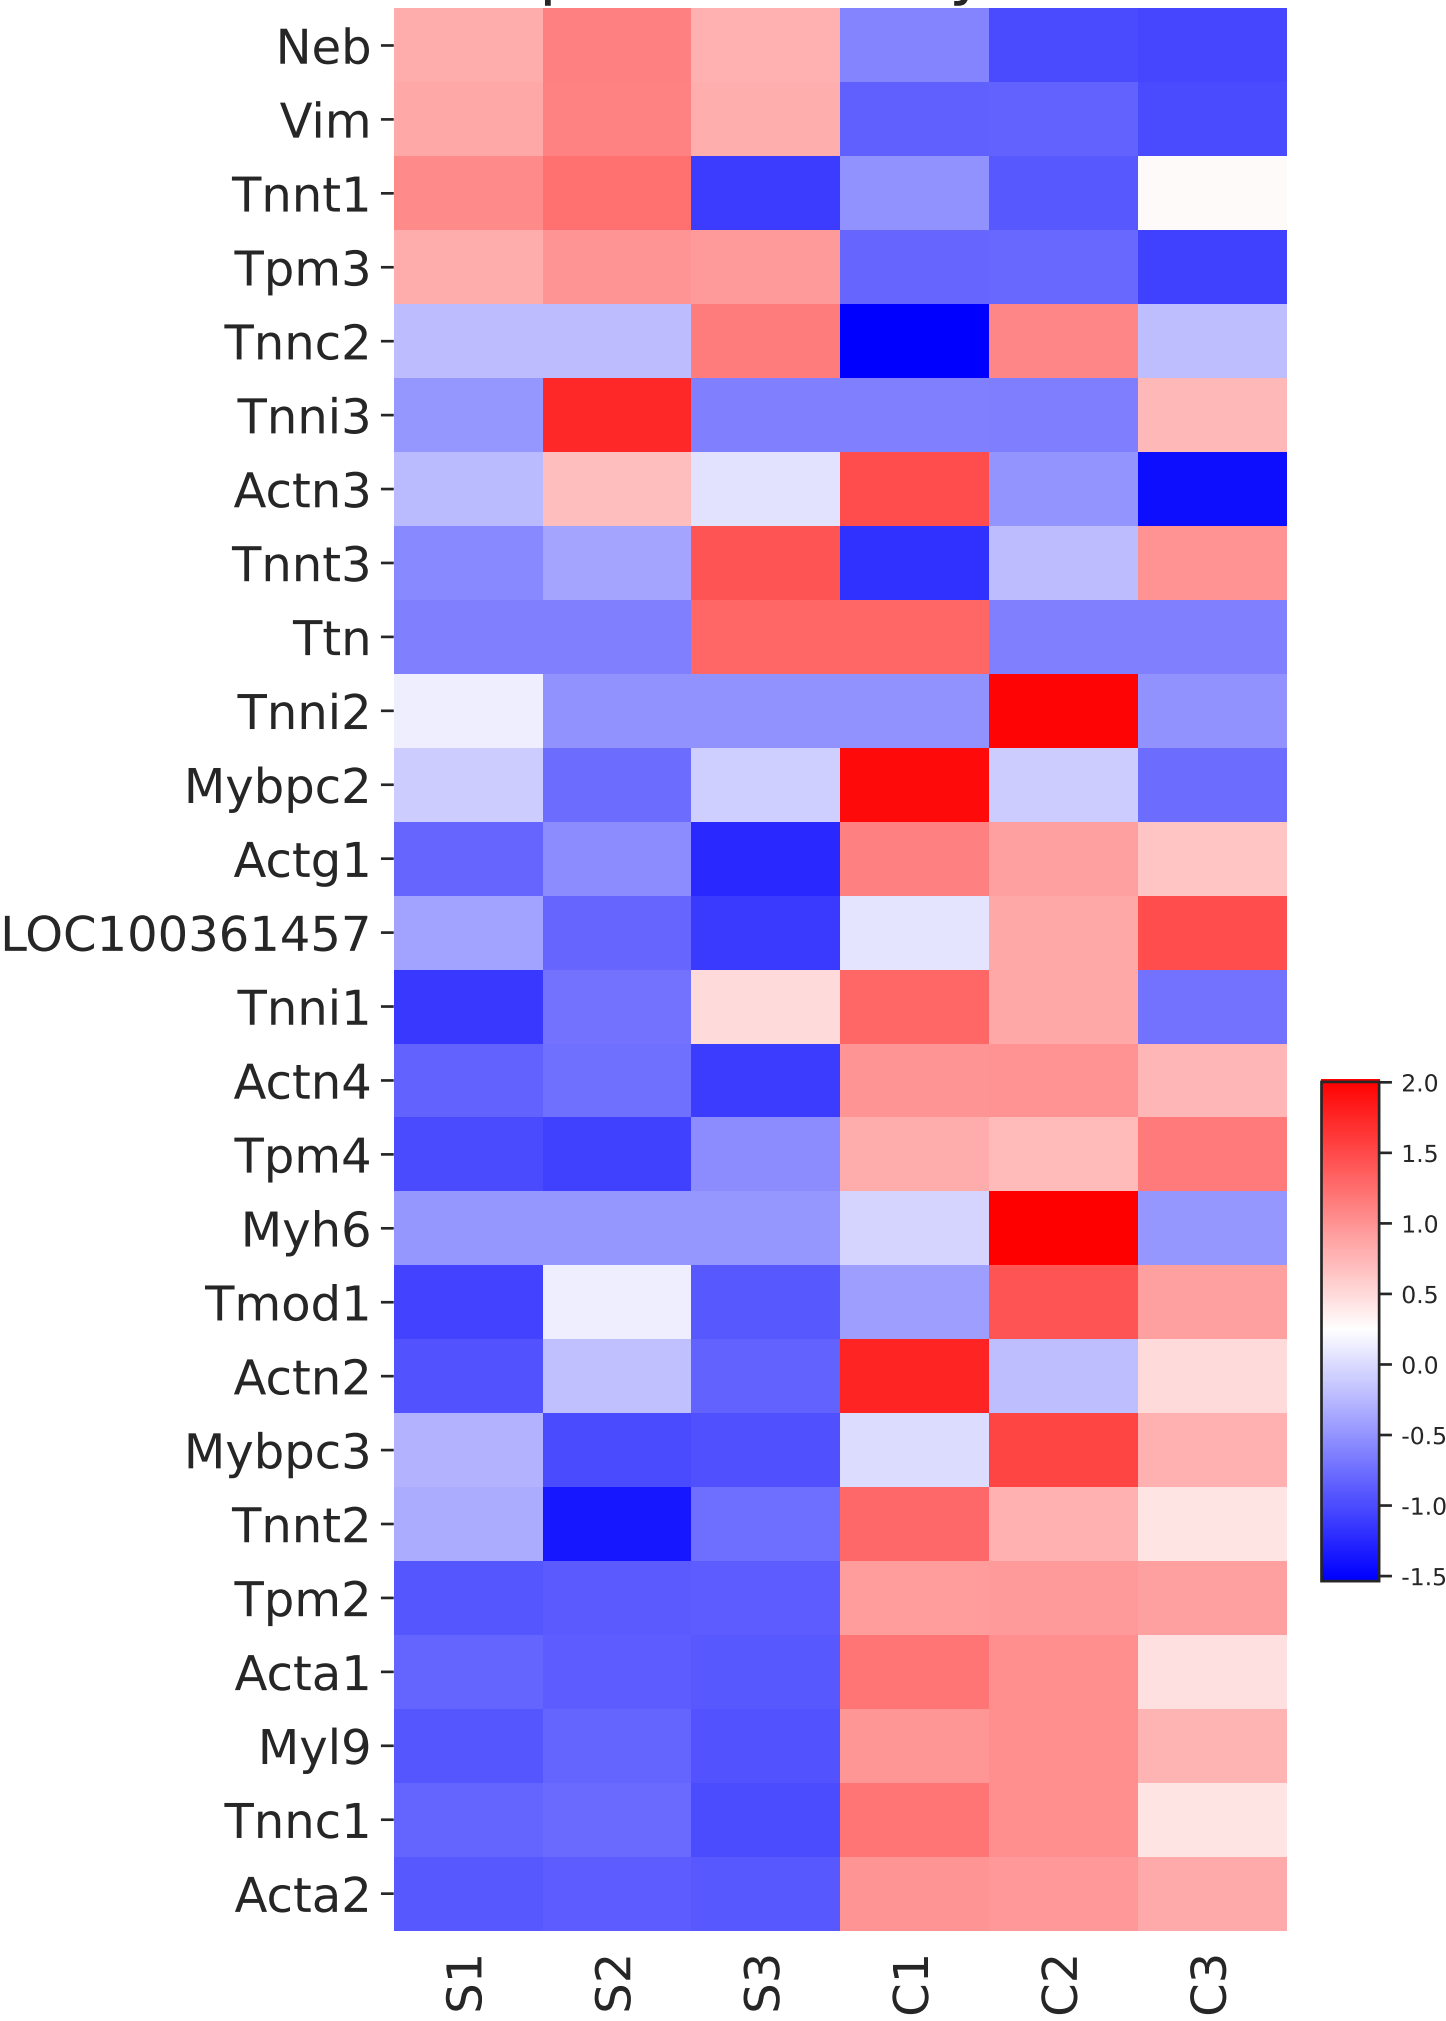

Supplement: Supplementary file 246 [file 83_Striated muscle contraction(WP316).heatmap.pdf › Source data/1.RNA-Seq source data/1.BMSCs/result/1.6.GSEA/S-vs-C/wiki/83_Striated muscle contraction(WP316).heatmap.pdf]

# Cholesterol metabolism(WP632)

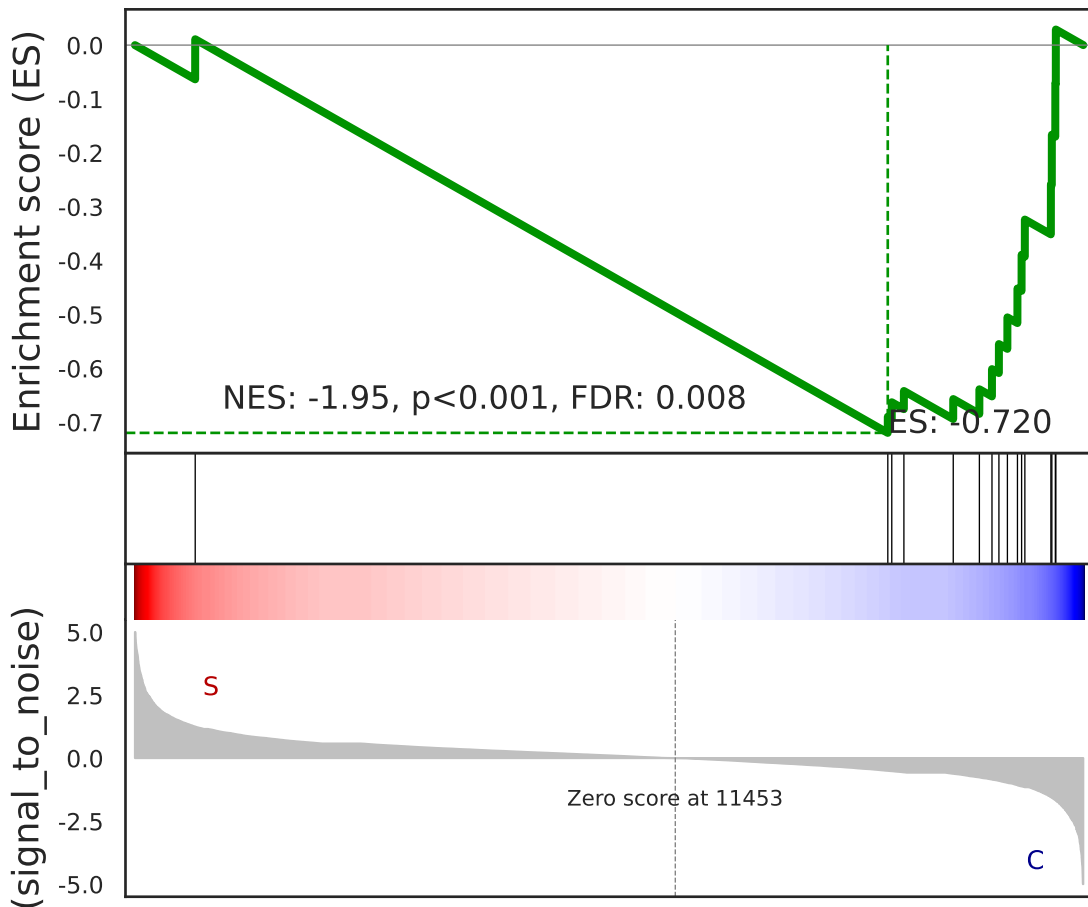

Supplement: Supplementary file 247 [file 84_Cholesterol metabolism(WP632).gsea.pdf › Source data/1.RNA-Seq source data/1.BMSCs/result/1.6.GSEA/S-vs-C/wiki/84_Cholesterol metabolism(WP632).gsea.pdf]

# Cholesterol metabolism(WP632)

## Heatmap of the Analyzed GeneSet

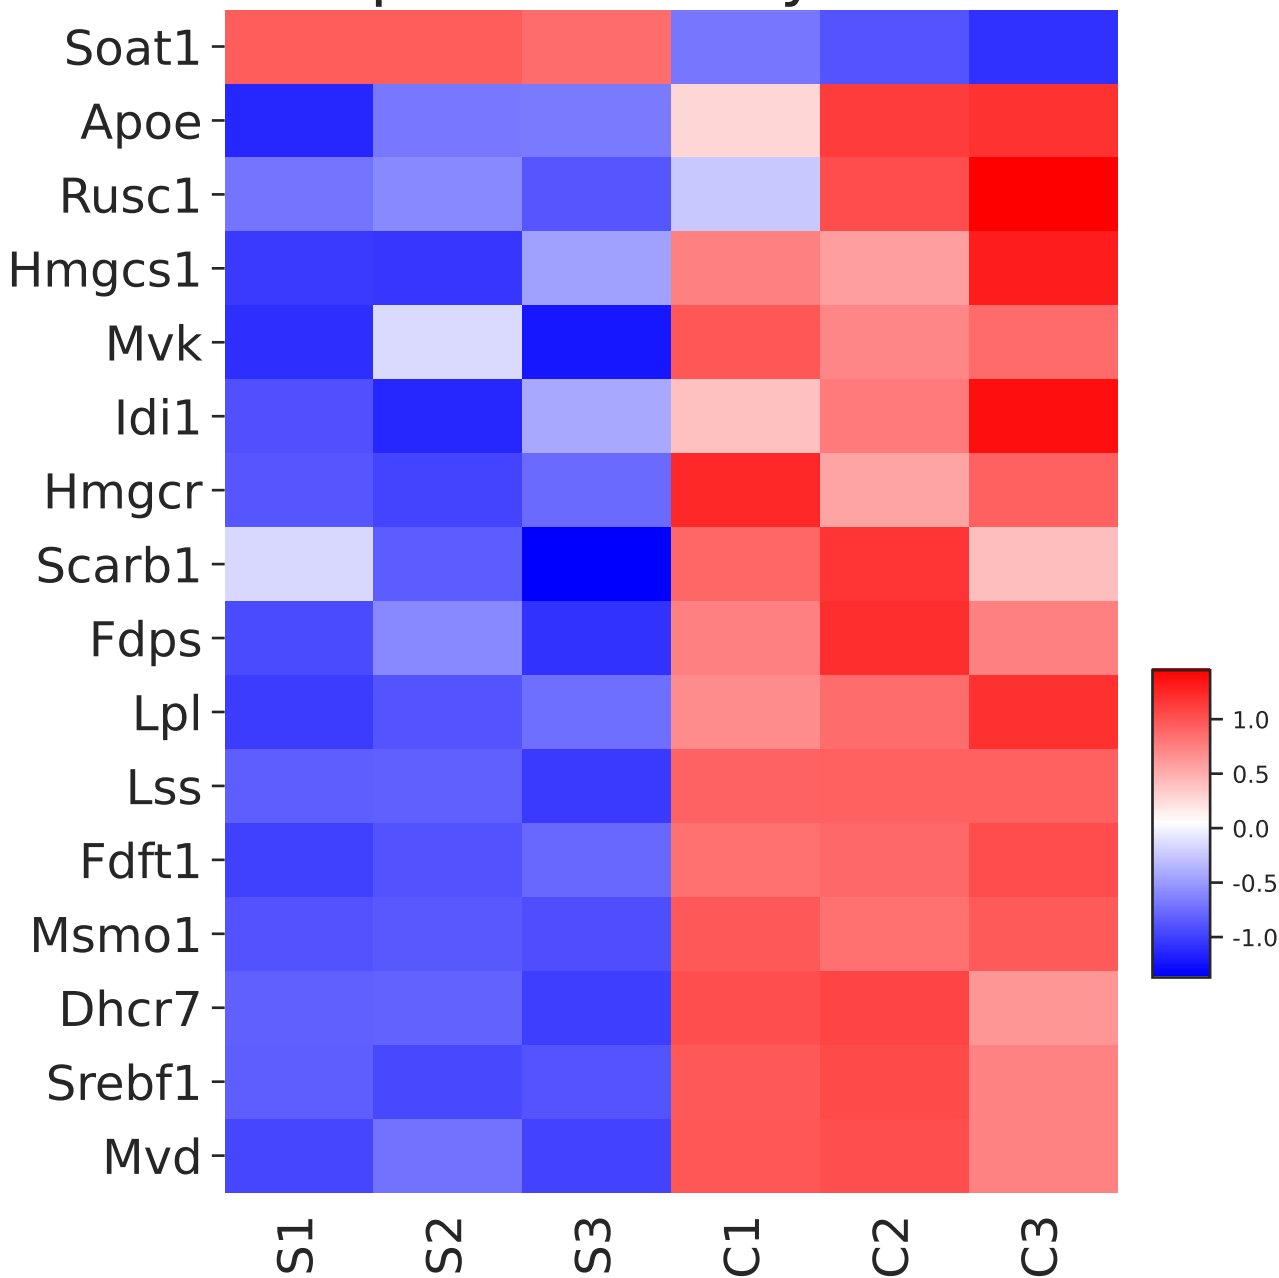

Supplement: Supplementary file 248 [file 84_Cholesterol metabolism(WP632).heatmap.pdf › Source data/1.RNA-Seq source data/1.BMSCs/result/1.6.GSEA/S-vs-C/wiki/84_Cholesterol metabolism(WP632).heatmap.pdf]

# TCA cycle(WP347)

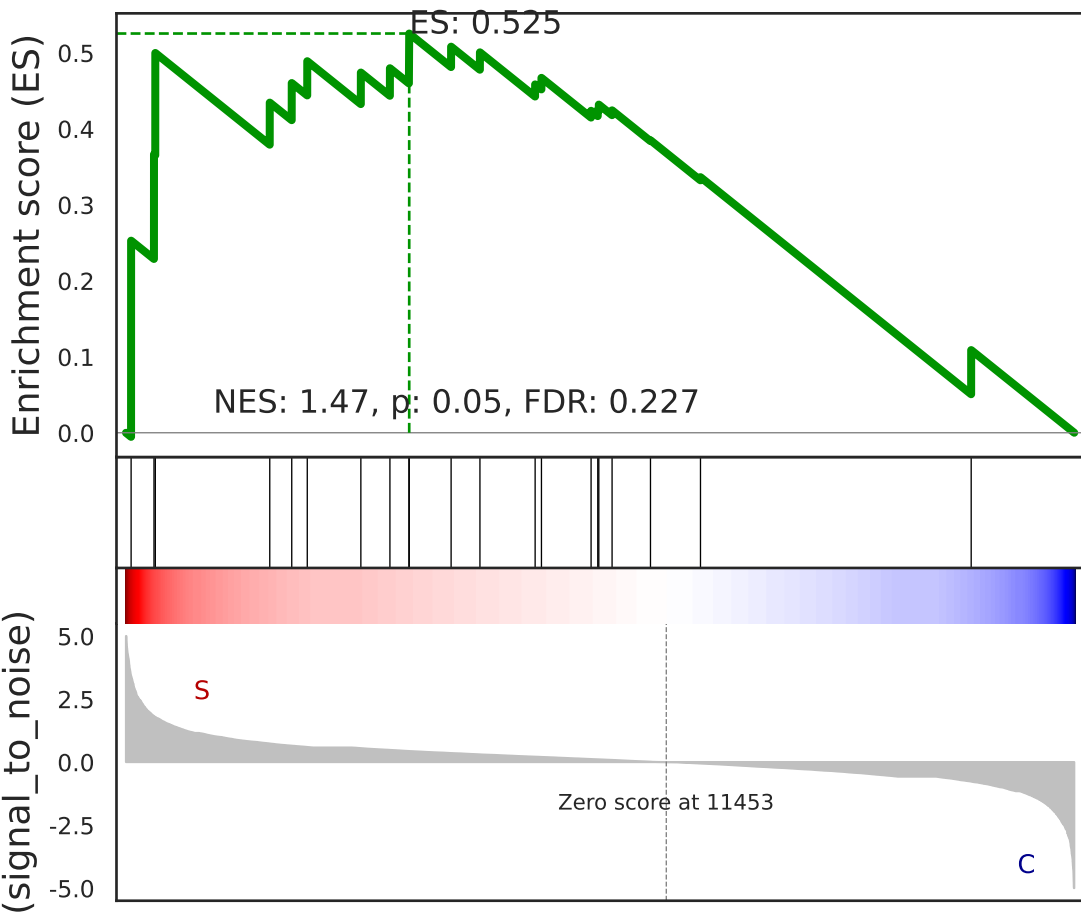

Supplement: Supplementary file 249 [file 8_TCA cycle(WP347).gsea.pdf › Source data/1.RNA-Seq source data/1.BMSCs/result/1.6.GSEA/S-vs-C/wiki/8_TCA cycle(WP347).gsea.pdf]

# TCA cycle(WP347)

## Heatmap of the Analyzed GeneSet

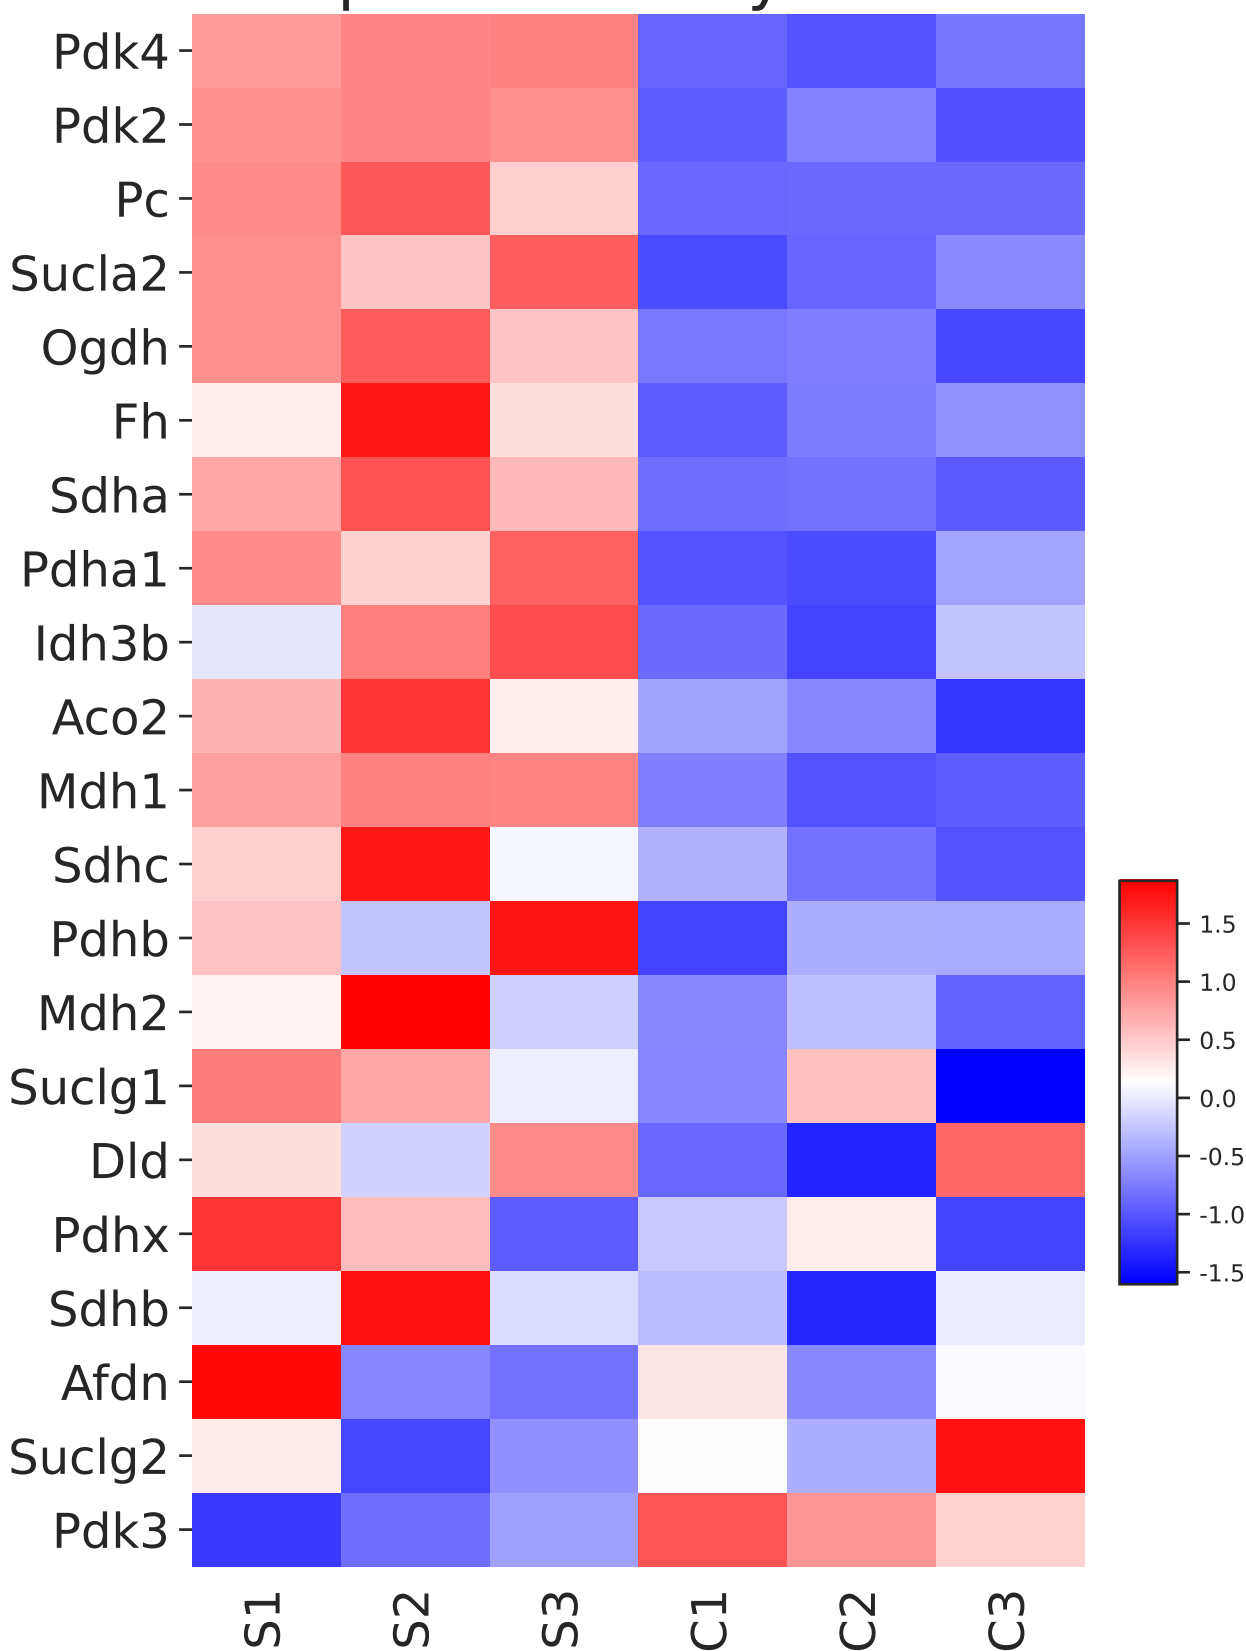

Supplement: Supplementary file 250 [file 8_TCA cycle(WP347).heatmap.pdf › Source data/1.RNA-Seq source data/1.BMSCs/result/1.6.GSEA/S-vs-C/wiki/8_TCA cycle(WP347).heatmap.pdf]

**Nuclear factor erythroid derived 2 like 2 signaling pathway(WP2376)**

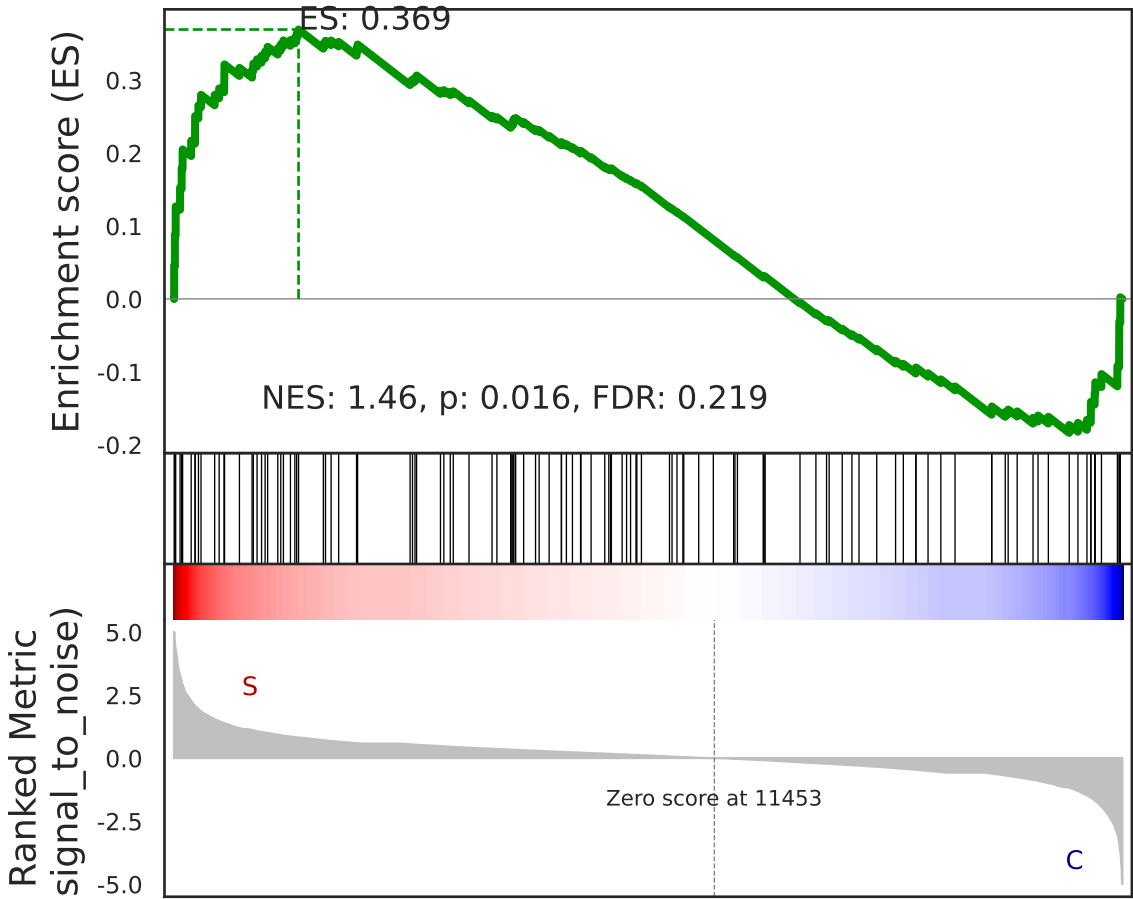

Supplement: Supplementary file 251 [file 9_Nuclear factor erythroid derived 2 like 2 signaling pathway(WP2376).gsea.pdf › Source data/1.RNA-Seq source data/1.BMSCs/result/1.6.GSEA/S-vs-C/wiki/9_Nuclear factor erythroid derived 2 like 2 signaling pathway(WP2376).gsea.pdf]

Nuclear factor erythroid derived 2 like 2 signaling pathway(WP2376)  
Heatmap of the Analyzed GeneSet

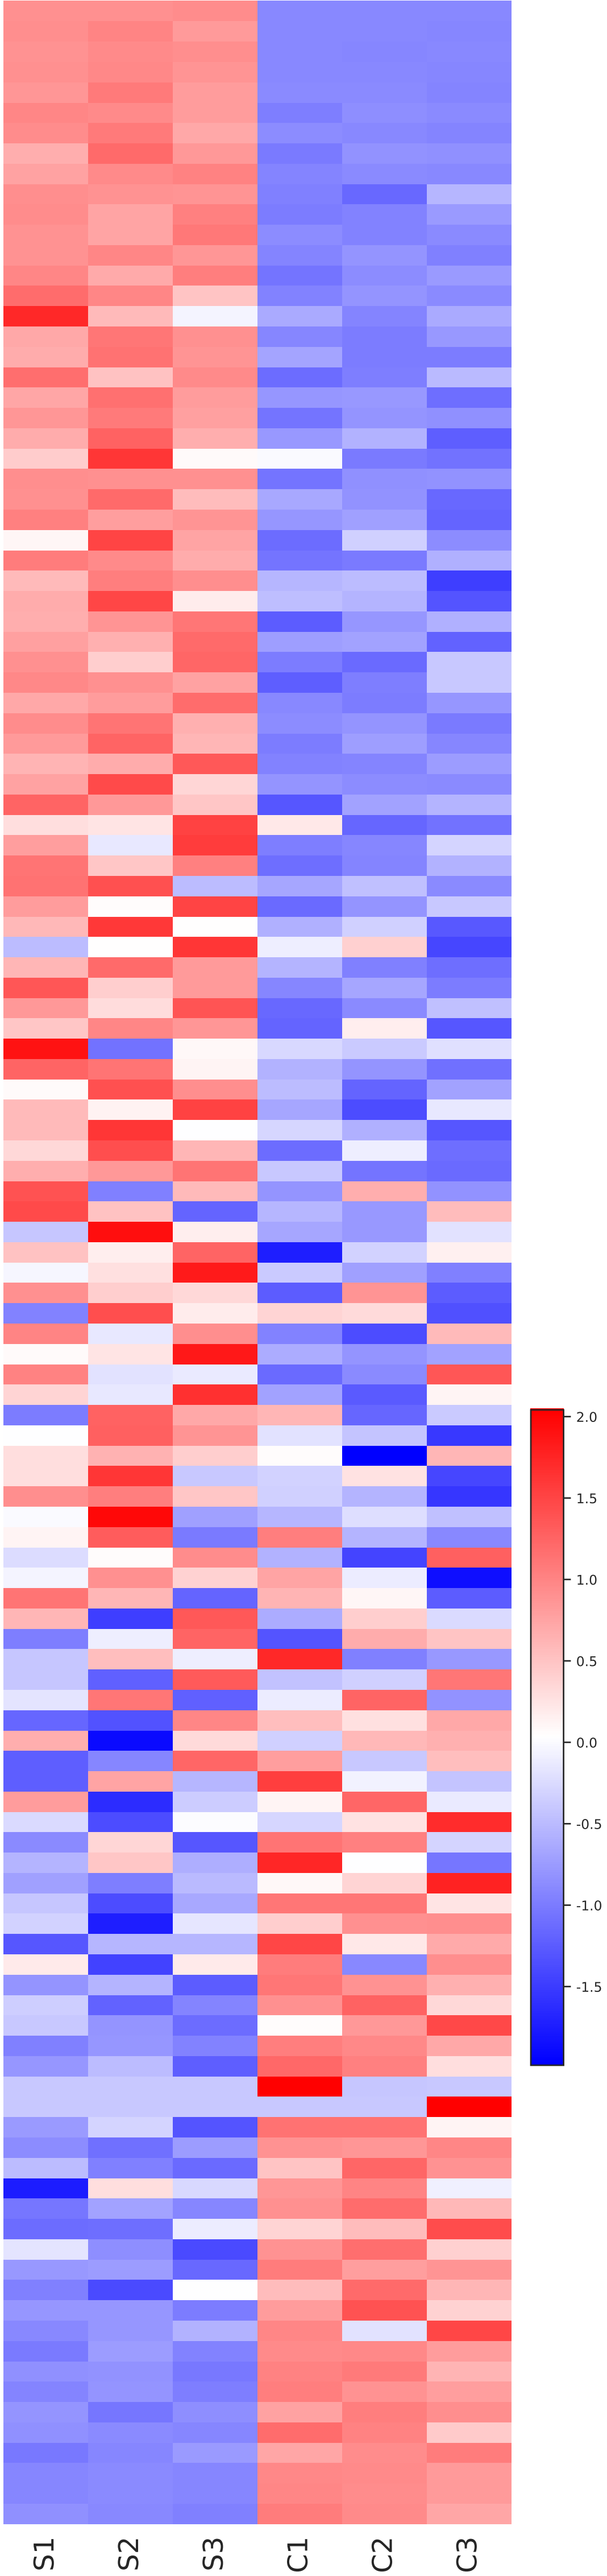

Supplement: Supplementary file 252 [file 9_Nuclear factor erythroid derived 2 like 2 signaling pathway(WP2376).heatmap.pdf › Source data/1.RNA-Seq source data/1.BMSCs/result/1.6.GSEA/S-vs-C/wiki/9_Nuclear factor erythroid derived 2 like 2 signaling pathway(WP2376).heatmap.pdf]

## TFs Family Distribution(S-vs-C)

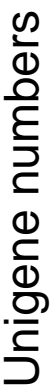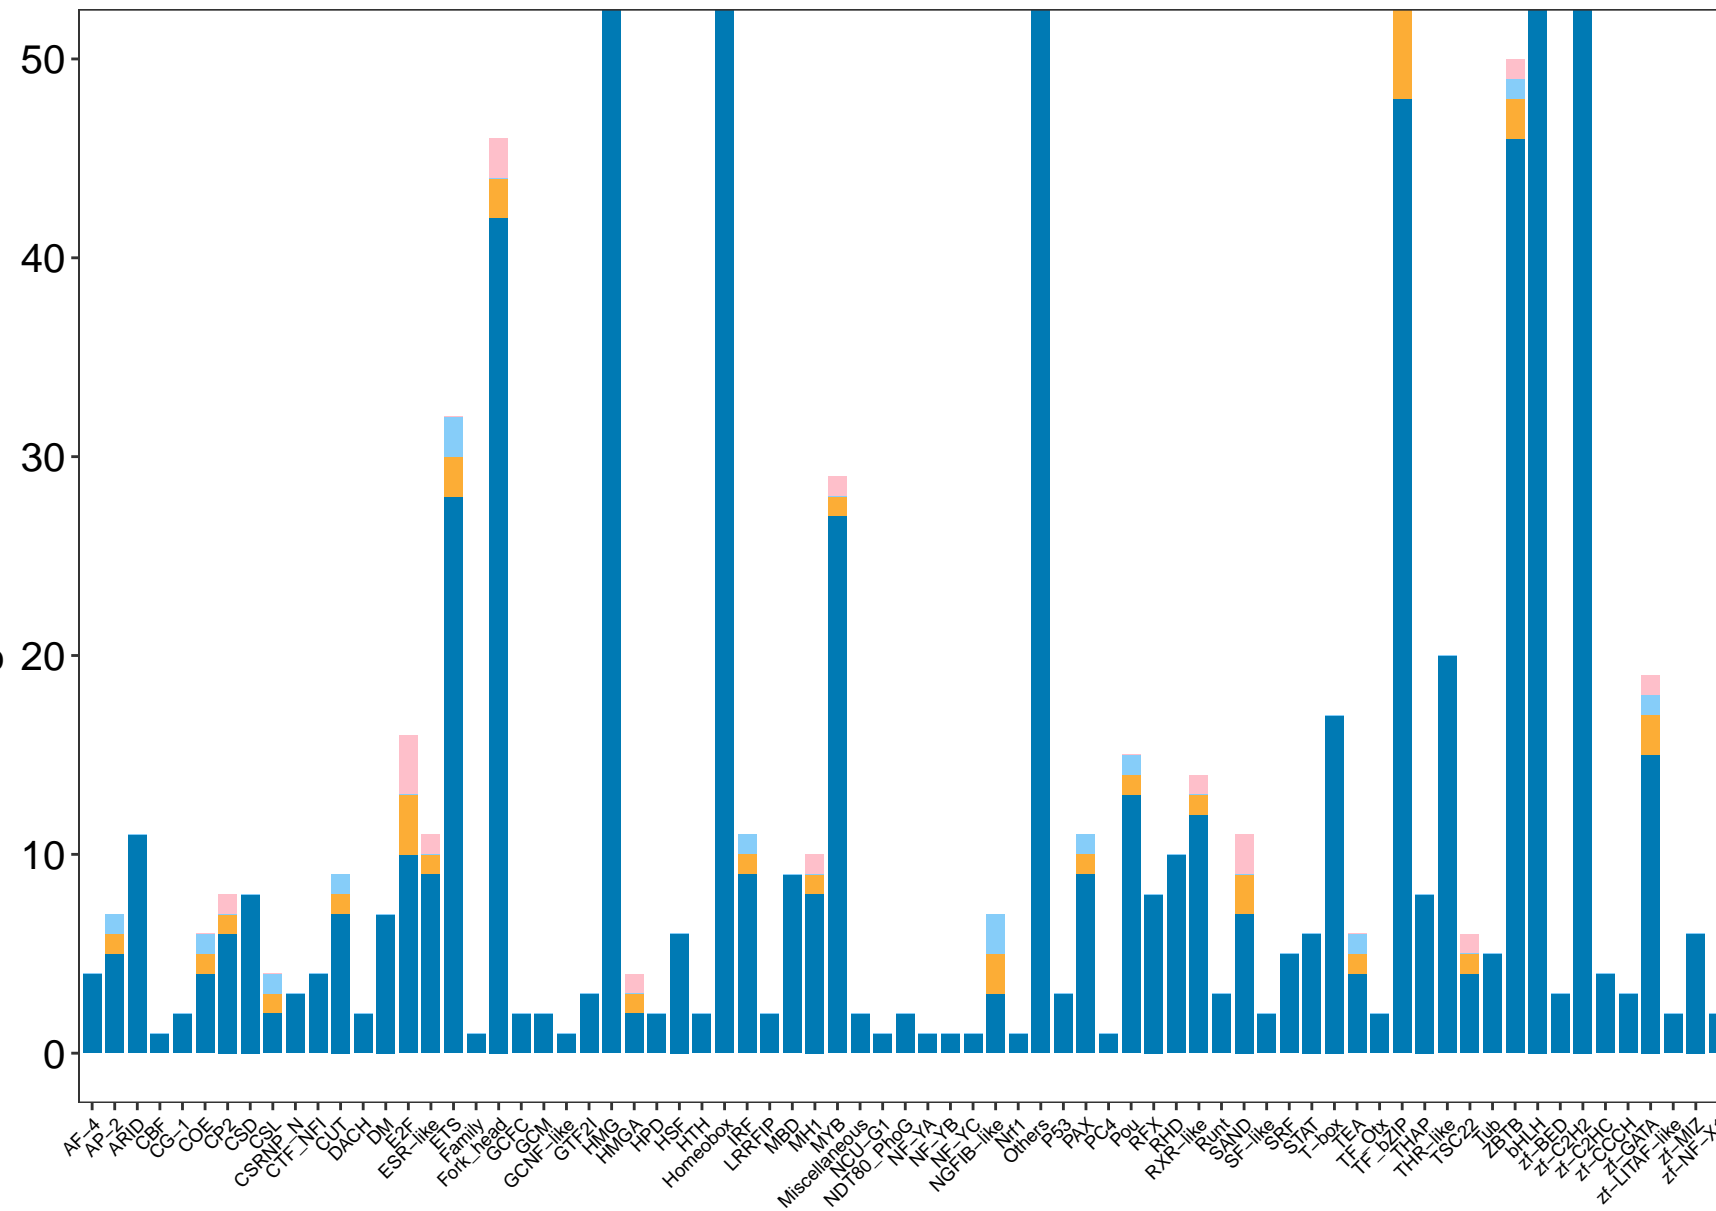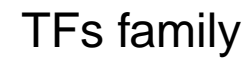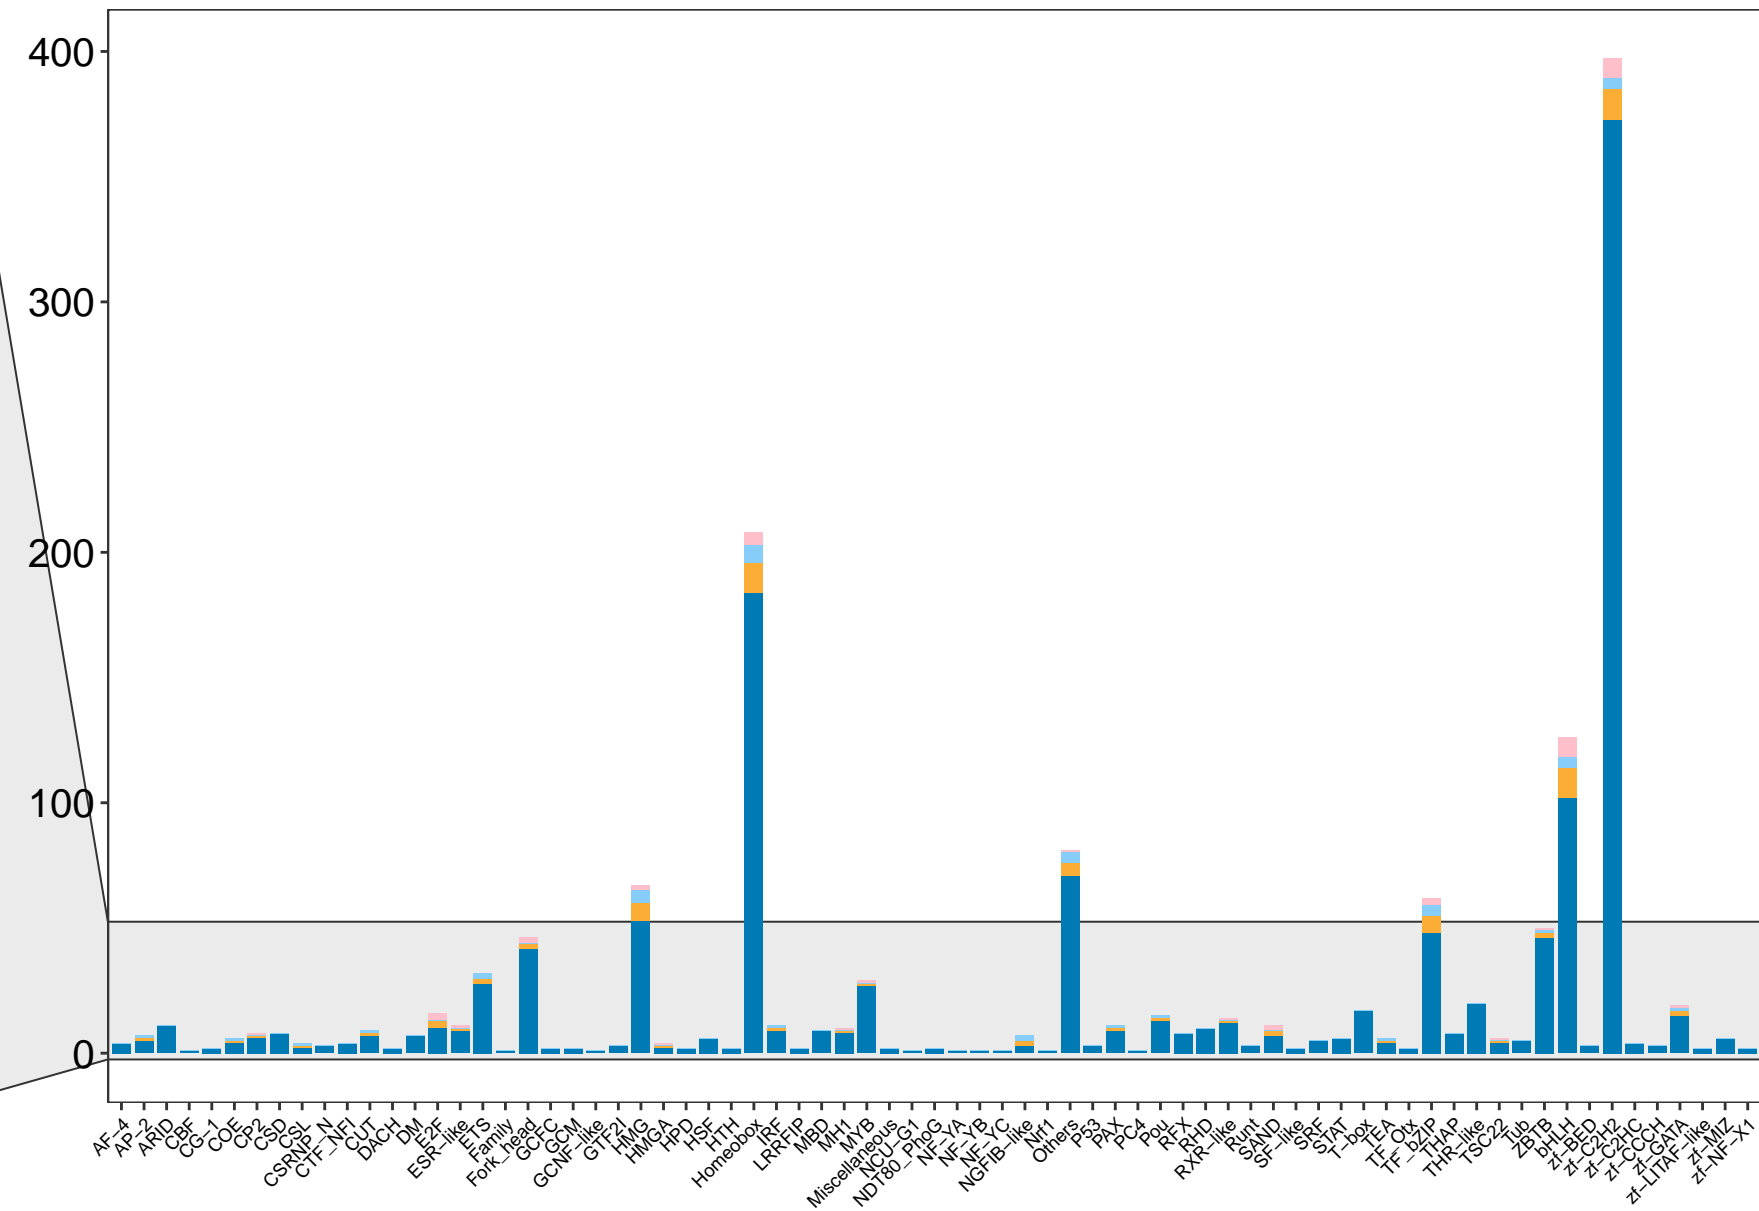

Group

■ Up

**Down**



DEG  
ALL

■ ALL

Supplement: Supplementary file 253 [file TFs_S-vs-C.pdf › Source data/1.RNA-Seq source data/1.BMSCs/result/1.7.TFs_targets_gene/S-vs-C/TFs_S-vs-C.pdf]

Targets statistics of (diff-S-vs-C\_TF\_regulation)

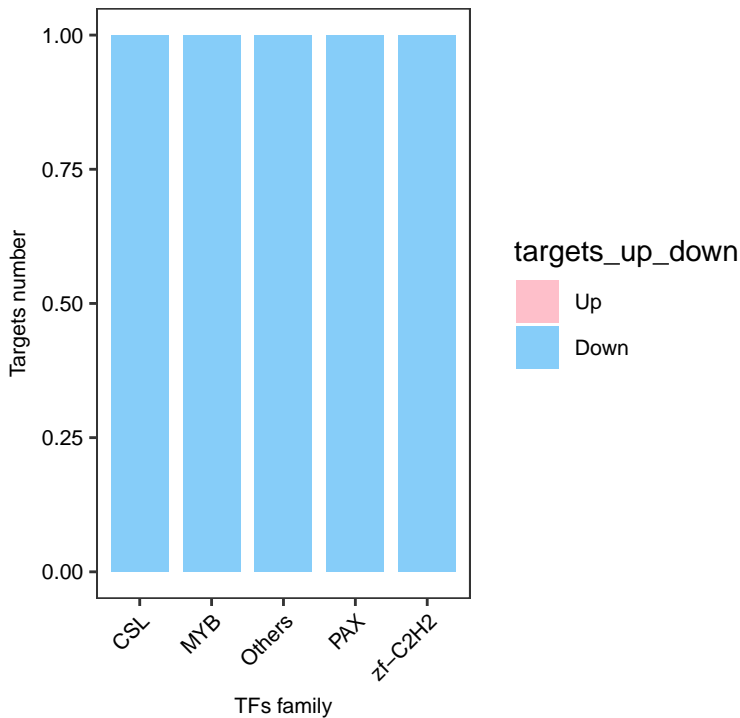

Supplement: Supplementary file 254 [file Target_Statistics_diff-S-vs-C_TF_regulation.pdf › Source data/1.RNA-Seq source data/1.BMSCs/result/1.7.TFs_targets_gene/S-vs-C/Target_Statistics_diff-S-vs-C_TF_regulation.pdf]

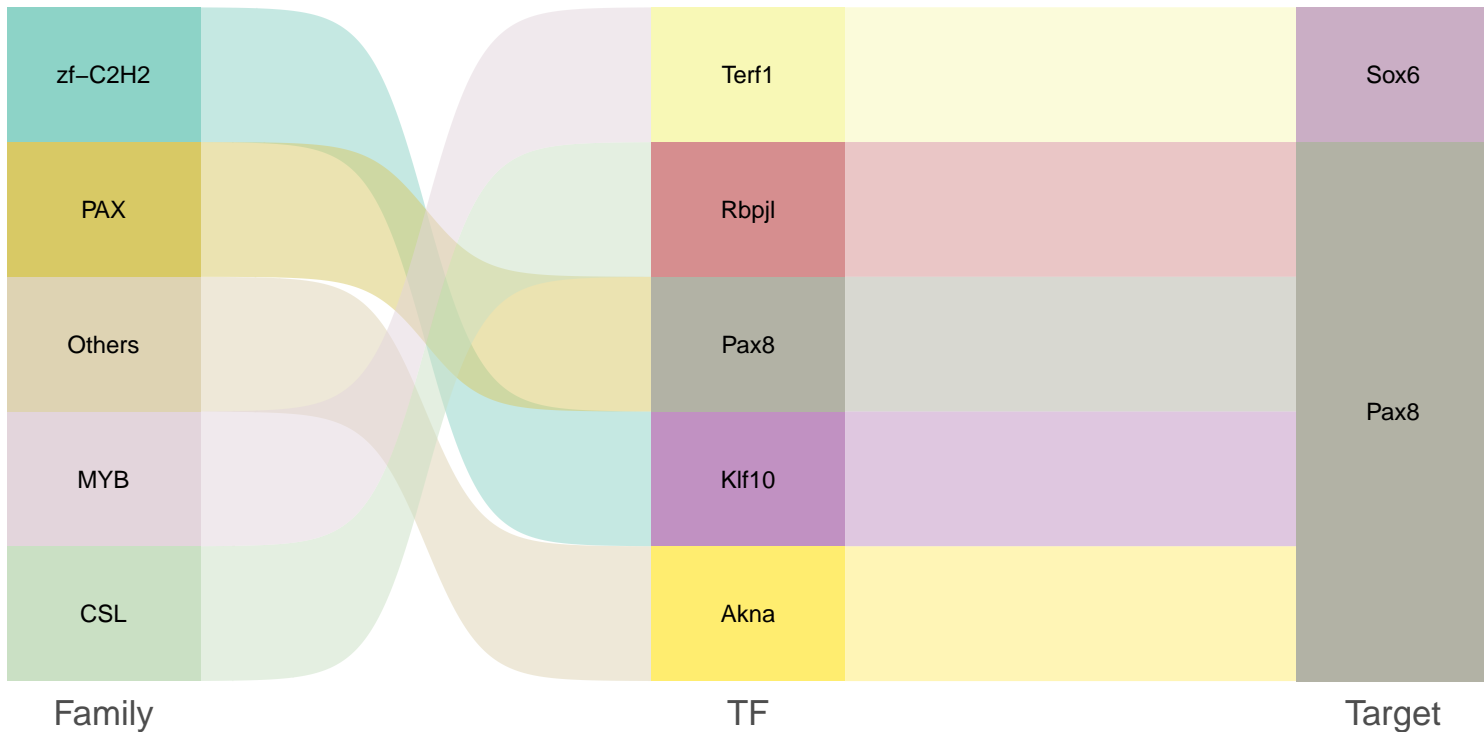

Supplement: Supplementary file 255 [file diff-S-vs-C_TF_regulation.sankey.pdf › Source data/1.RNA-Seq source data/1.BMSCs/result/1.7.TFs_targets_gene/S-vs-C/diff-S-vs-C_TF_regulation.sankey.pdf]

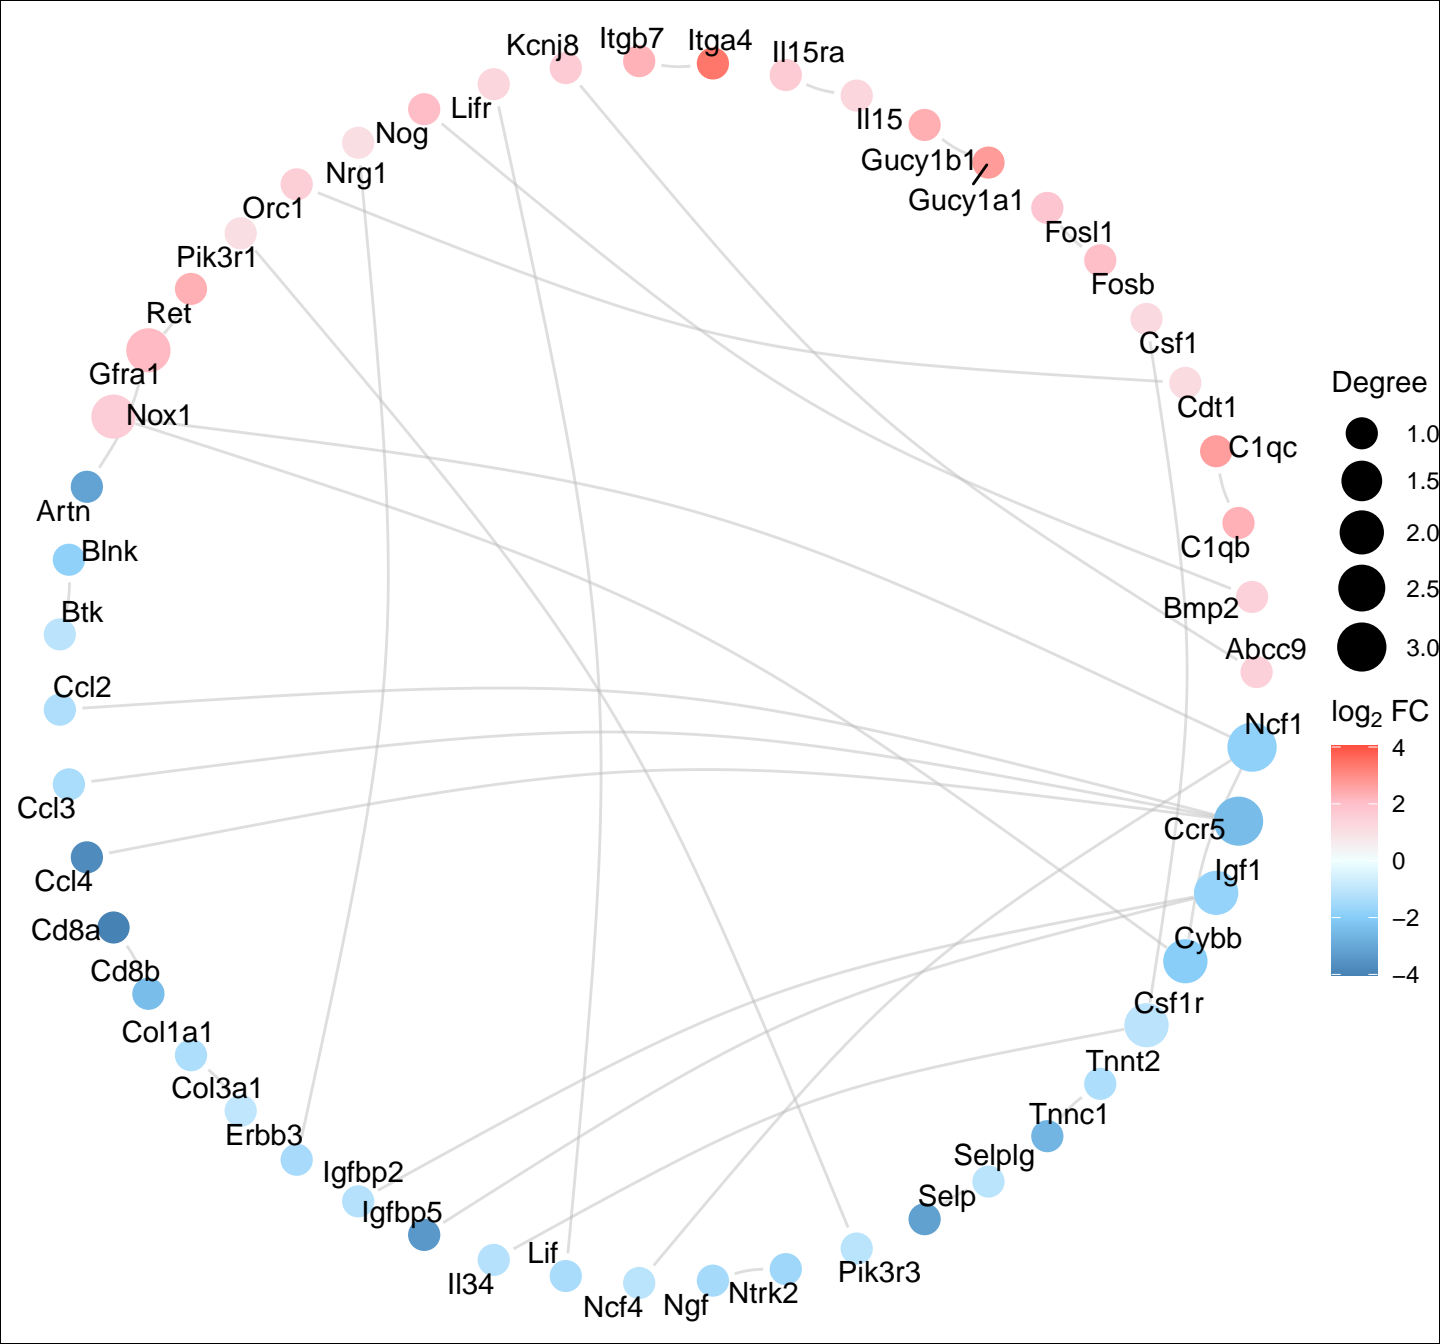

Supplement: Supplementary file 256 [file top_30_diff-S-vs-C_network.pdf › Source data/1.RNA-Seq source data/1.BMSCs/result/1.8.PPI/S-vs-C/top_30_diff-S-vs-C_network.pdf]

# Base distribution of C1

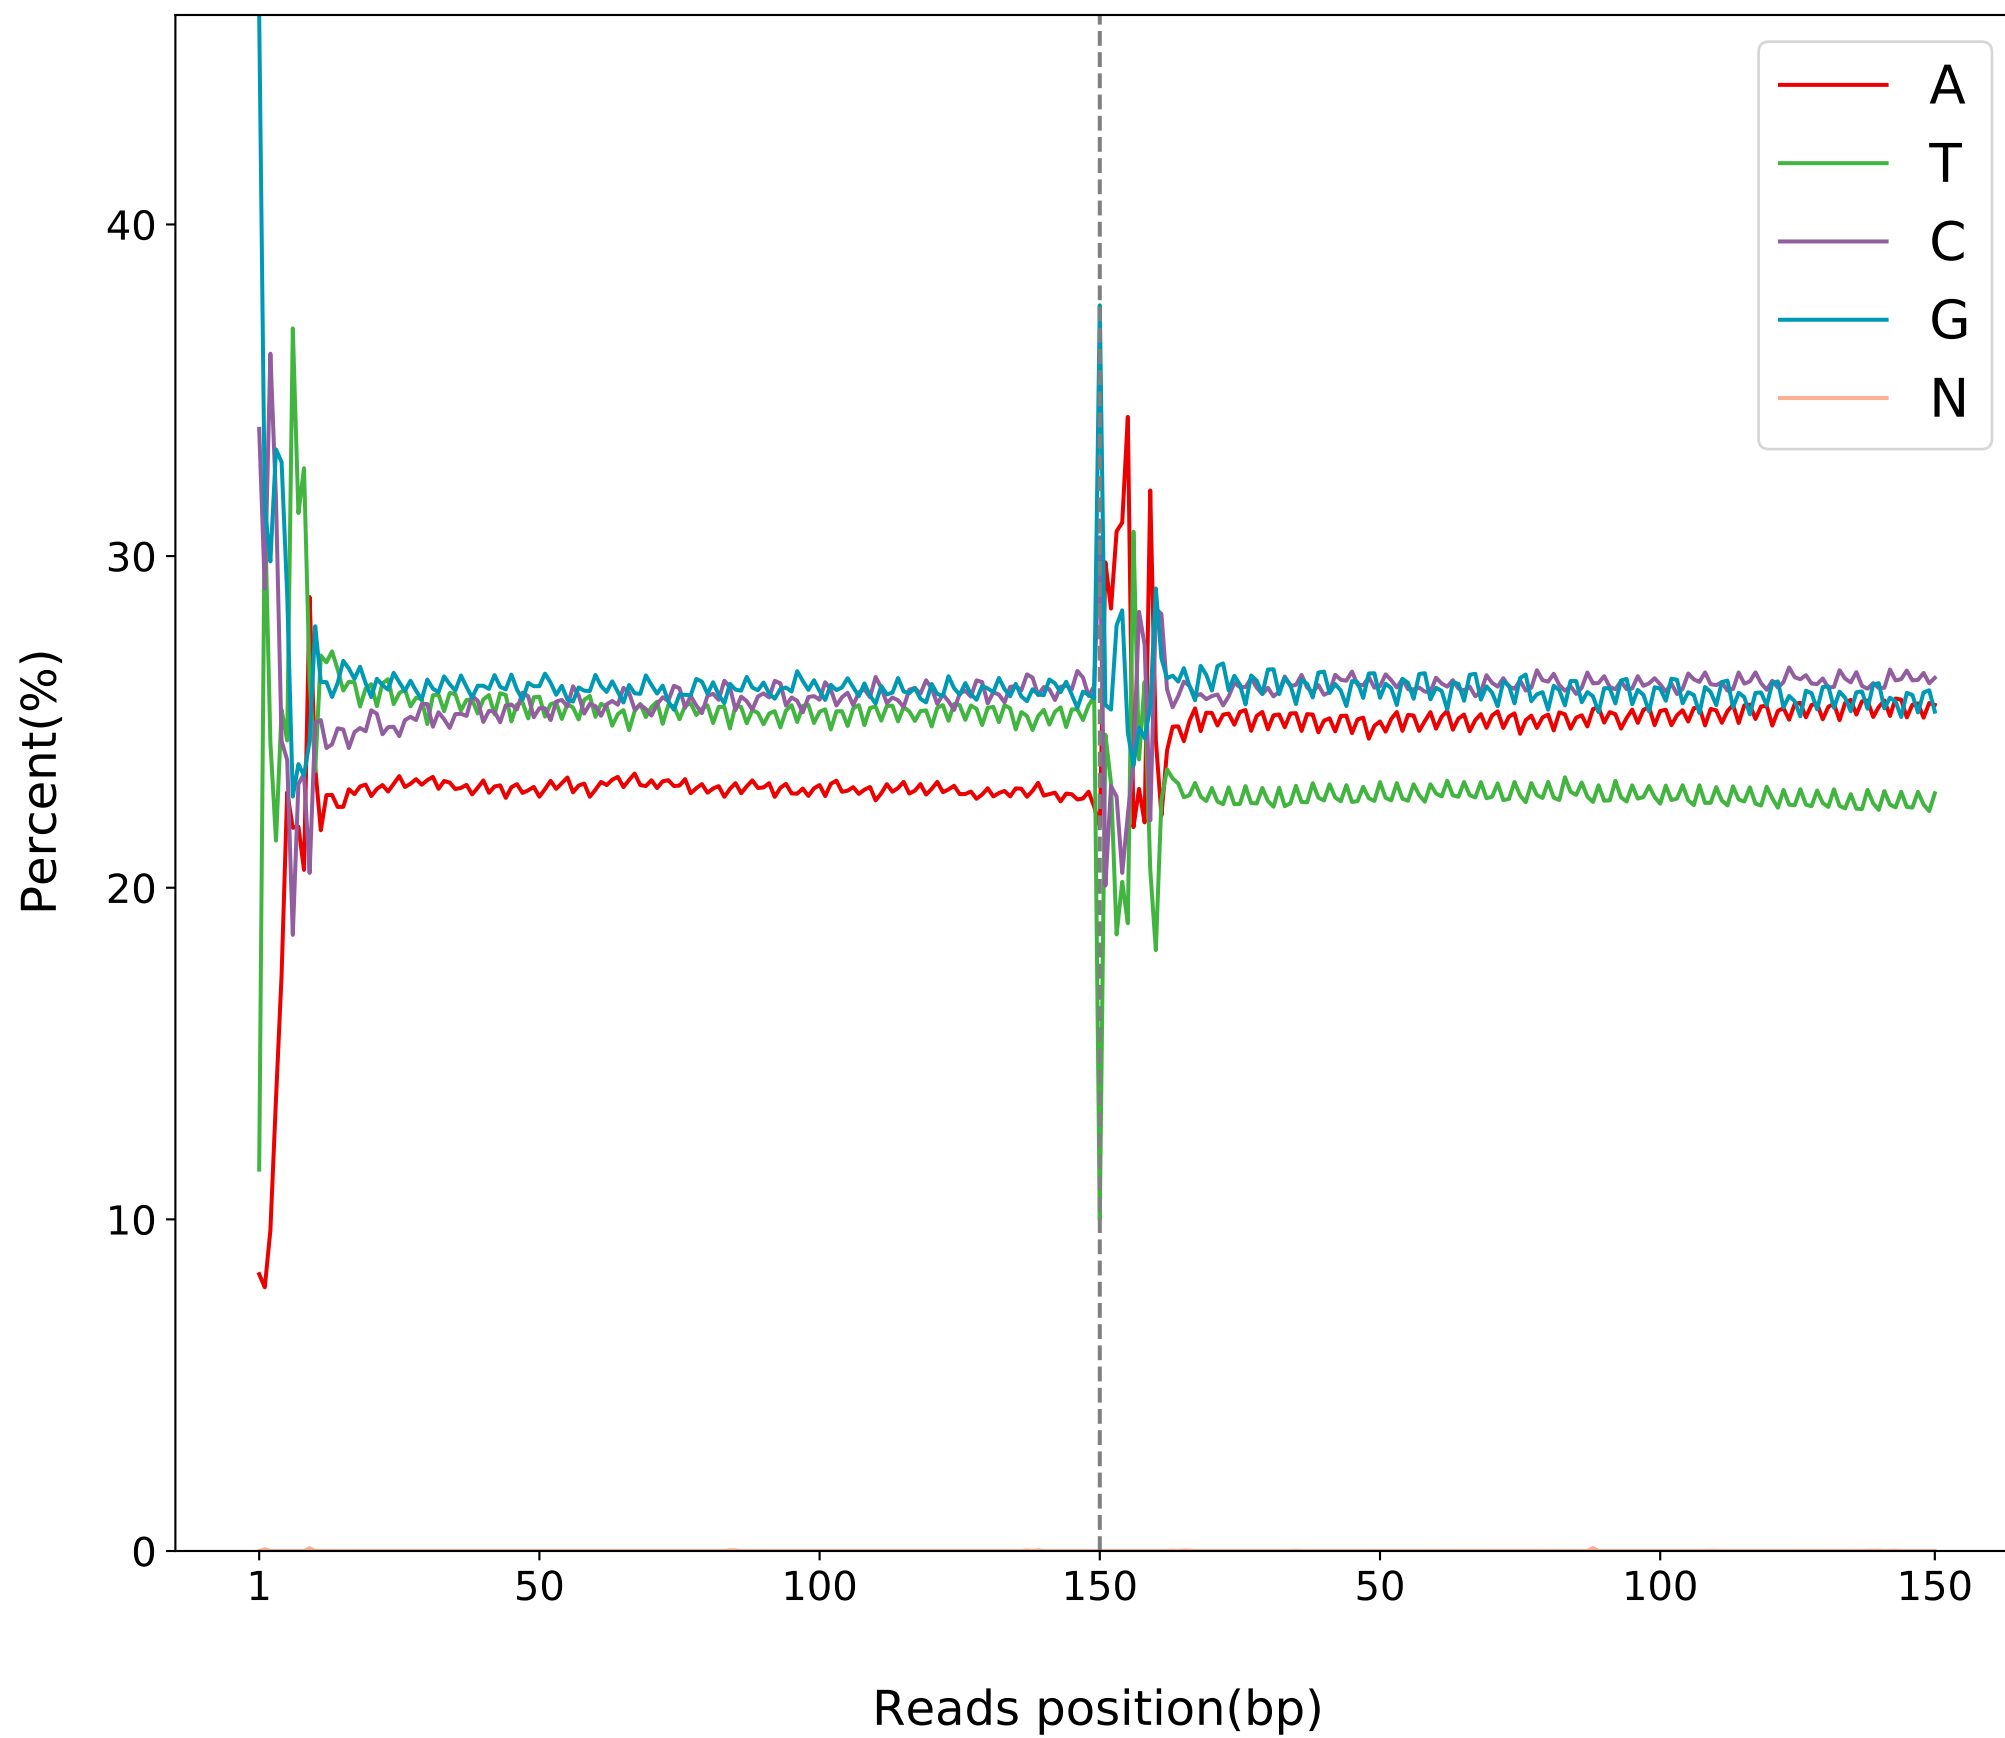

Supplement: Supplementary file 257 [file C1.cleandata.base.pdf › Source data/1.RNA-Seq source data/1.BMSCs/result/2.quality_control/2.1.fastqc/C1.cleandata.base.pdf]

# Quality distribution of C1

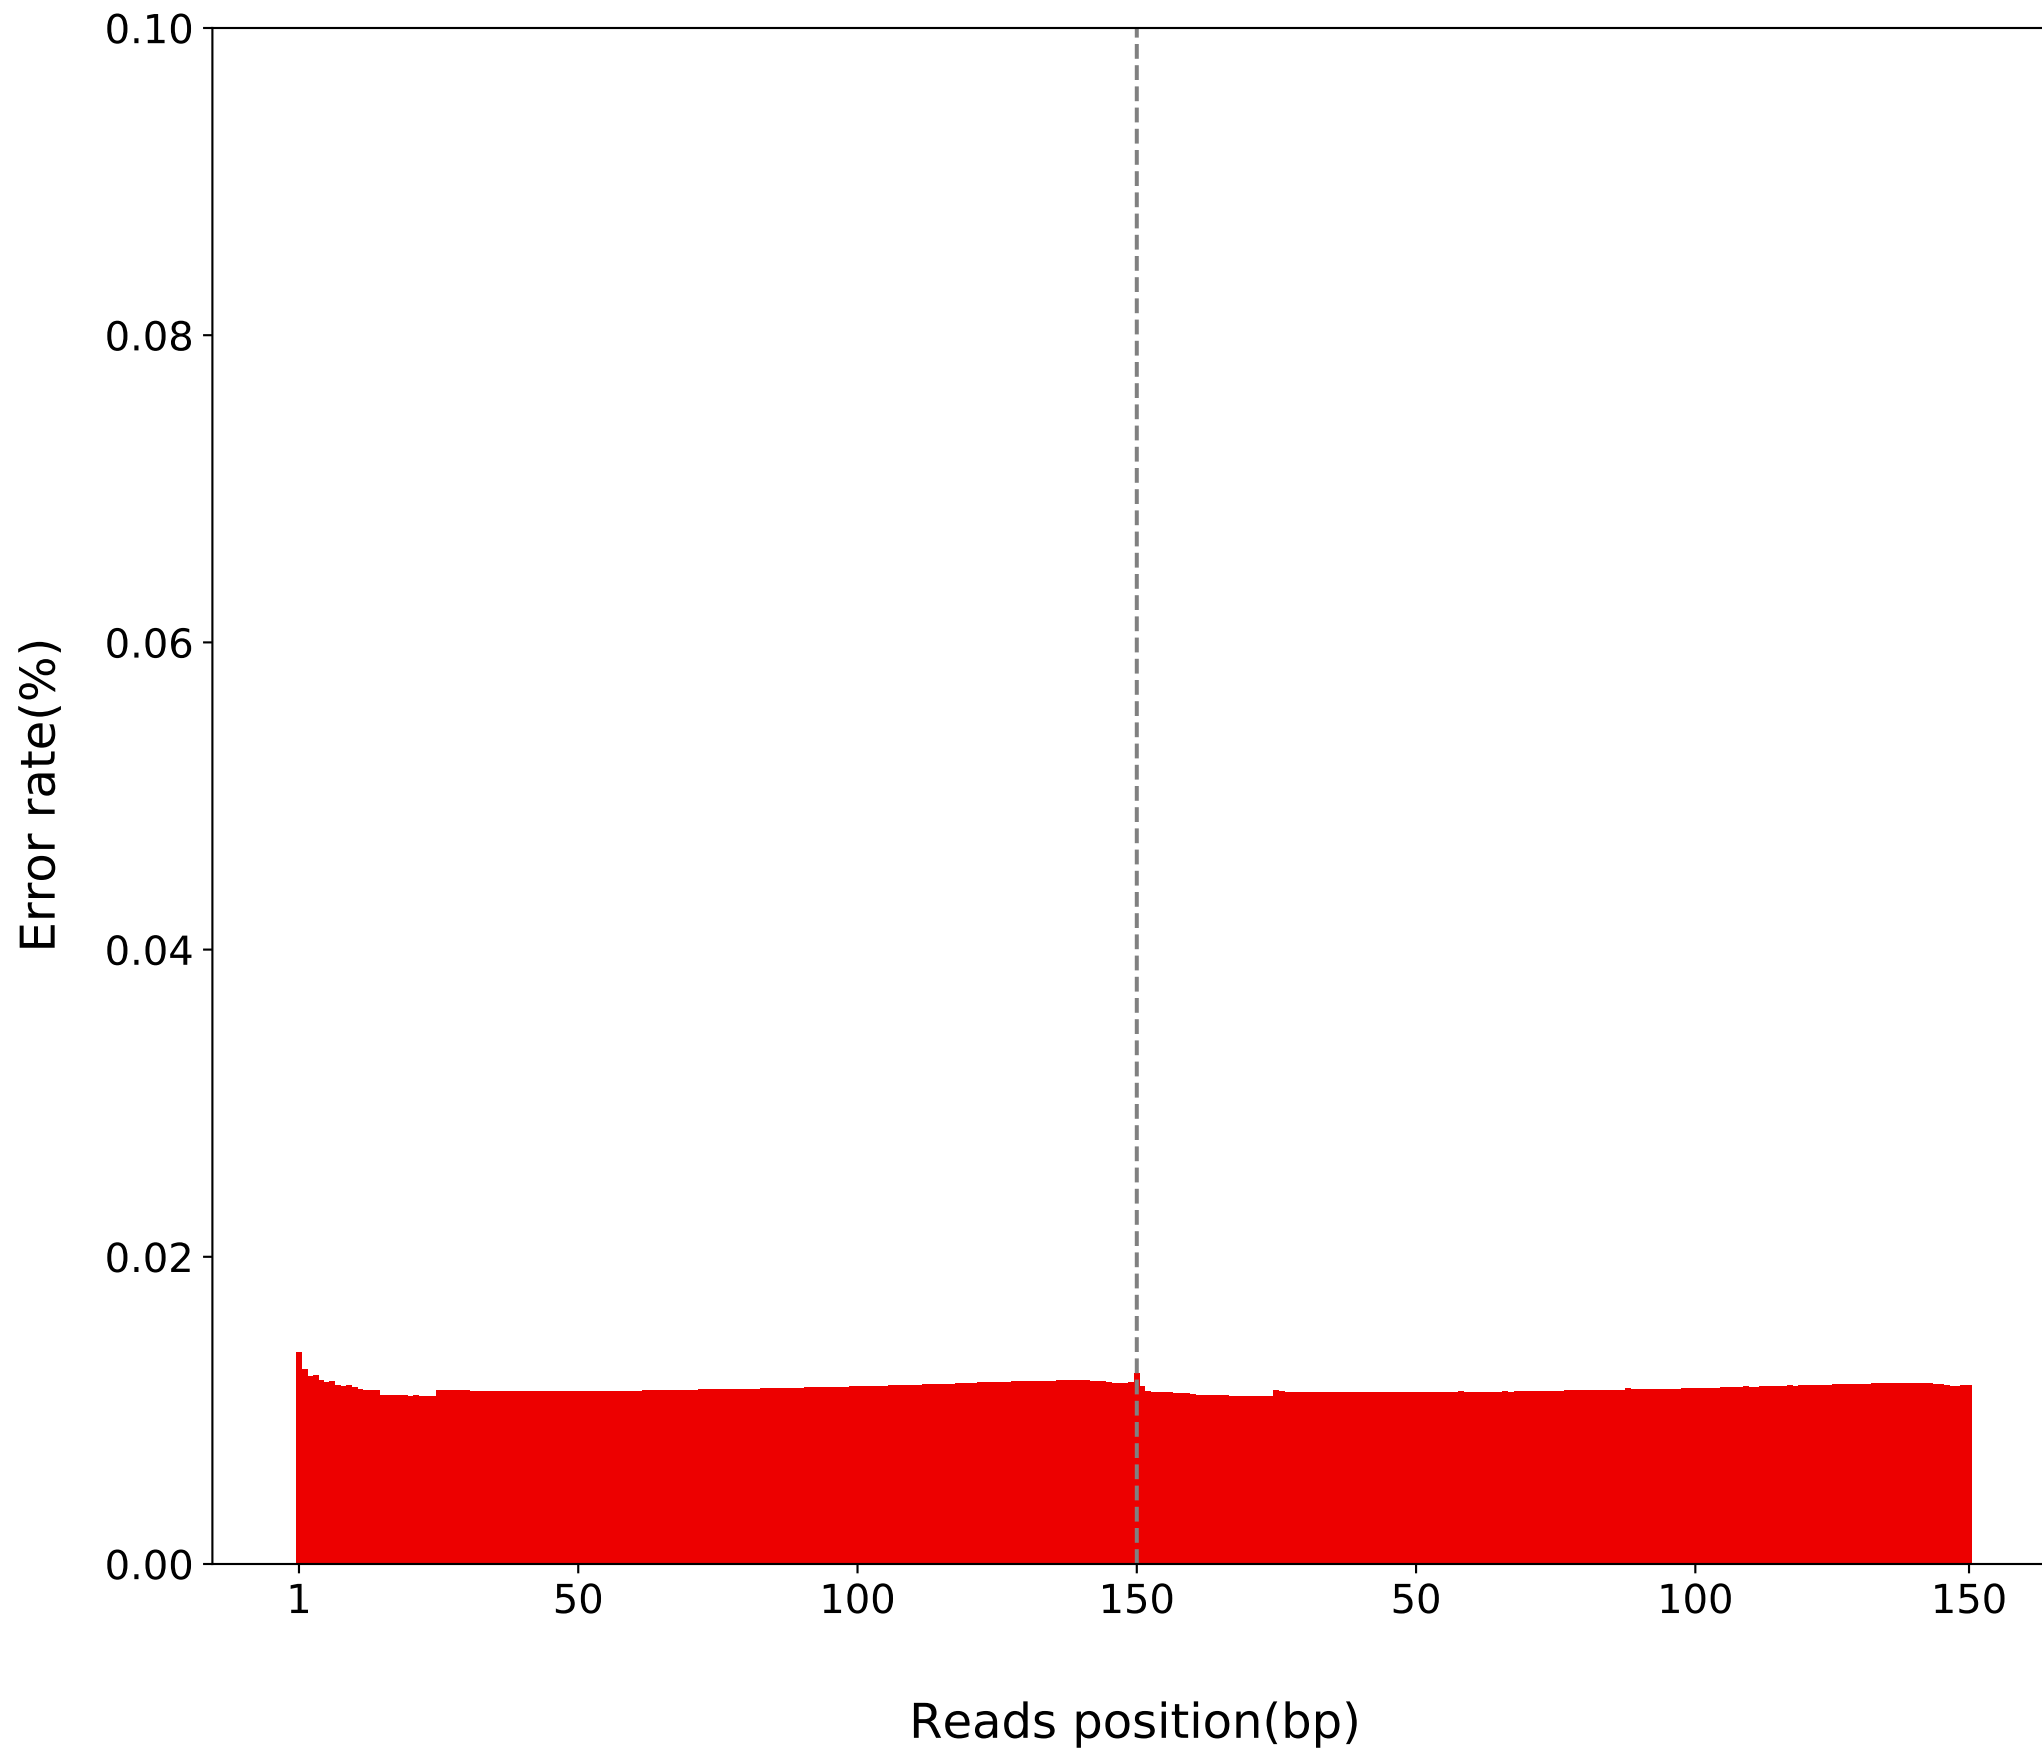

Supplement: Supplementary file 258 [file C1.cleandata.qual.pdf › Source data/1.RNA-Seq source data/1.BMSCs/result/2.quality_control/2.1.fastqc/C1.cleandata.qual.pdf]

# Base distribution of C2

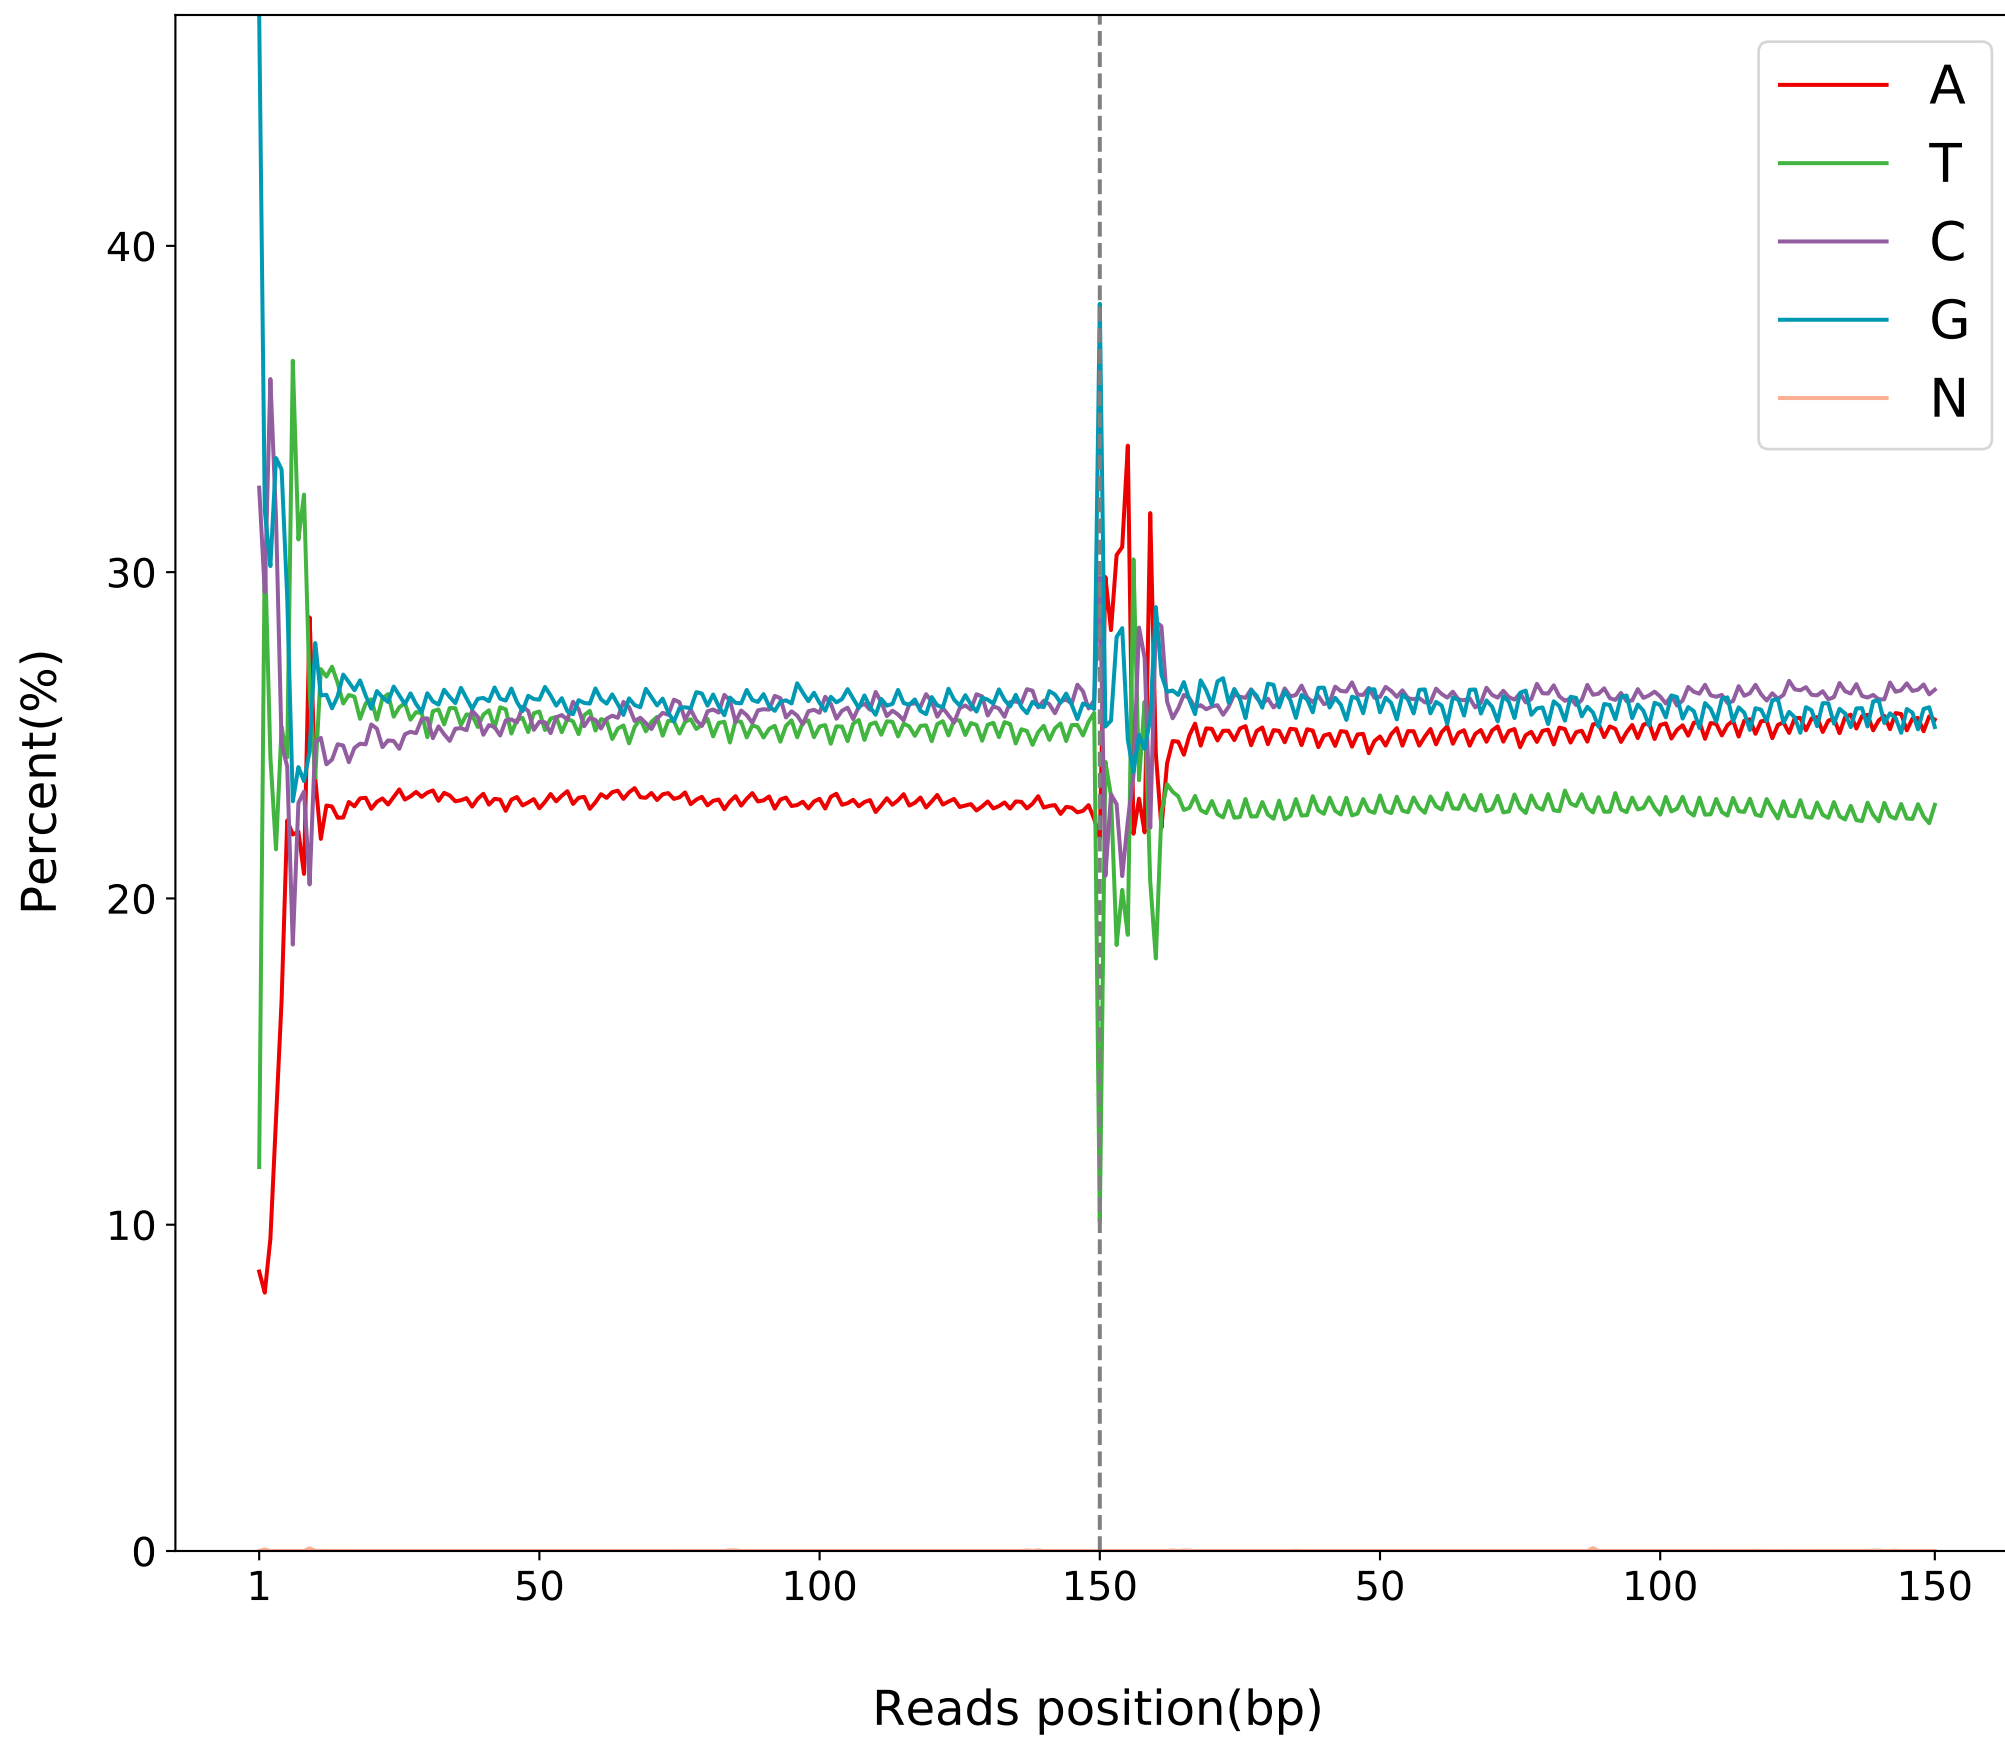

Supplement: Supplementary file 259 [file C2.cleandata.base.pdf › Source data/1.RNA-Seq source data/1.BMSCs/result/2.quality_control/2.1.fastqc/C2.cleandata.base.pdf]

# Quality distribution of C2

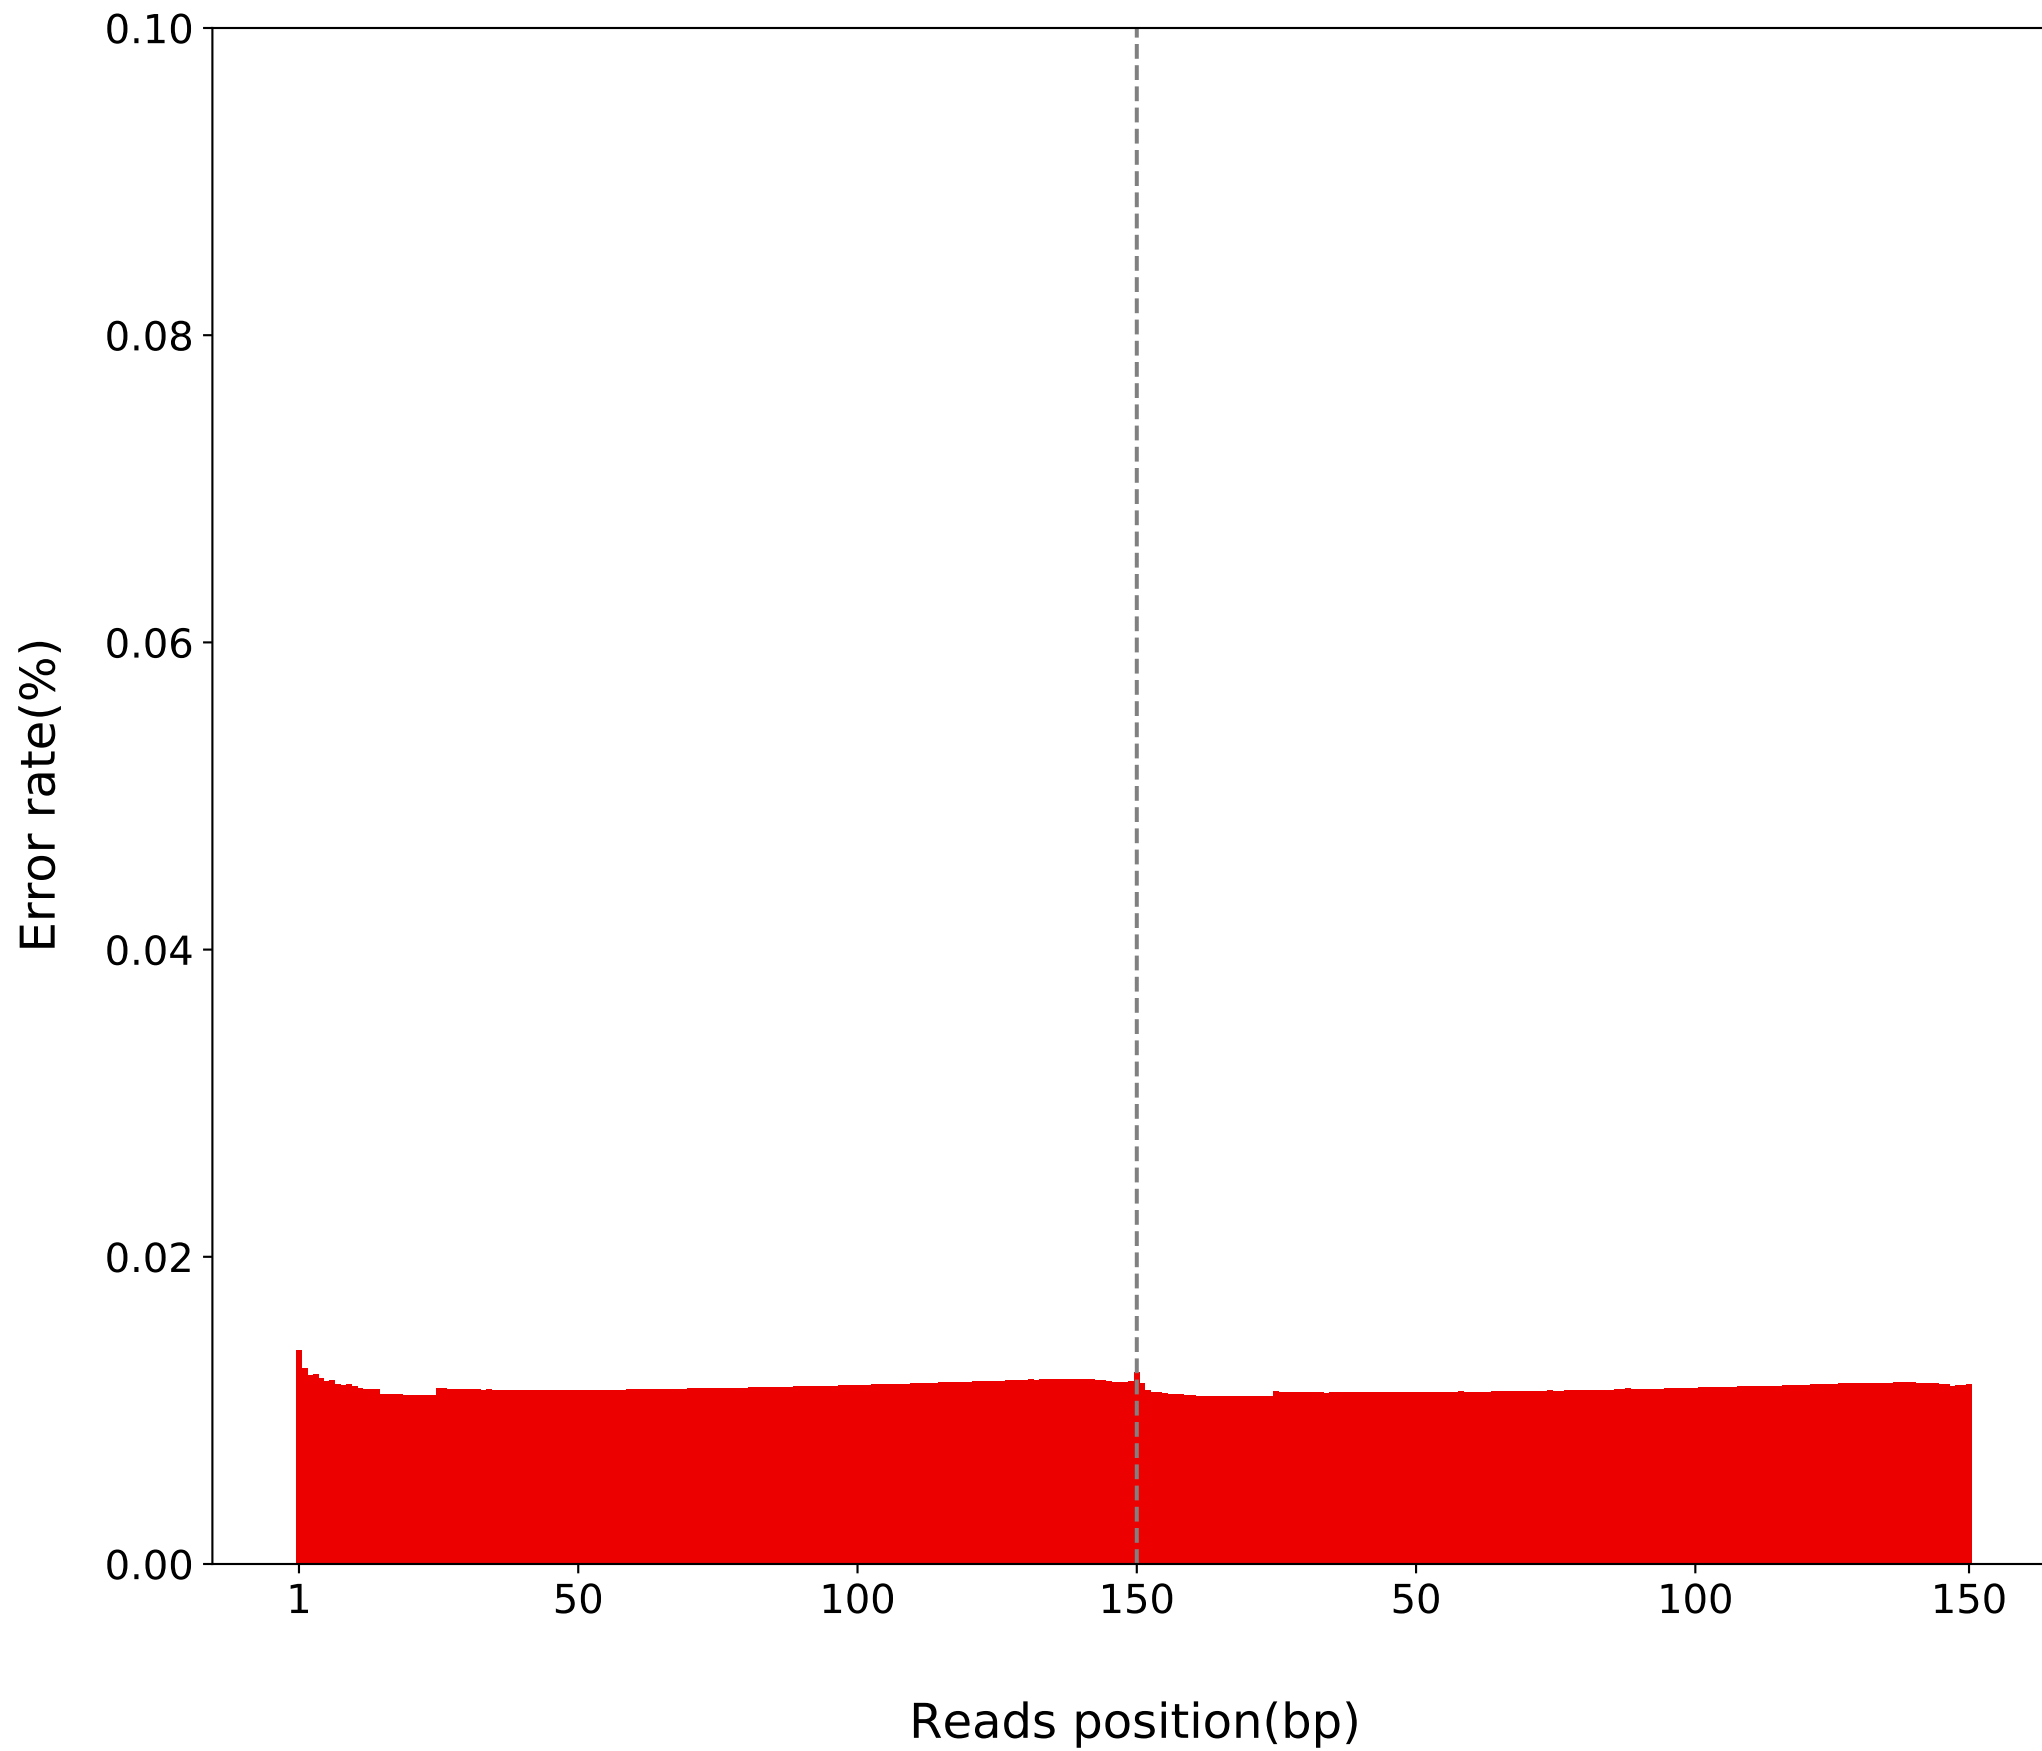

Supplement: Supplementary file 260 [file C2.cleandata.qual.pdf › Source data/1.RNA-Seq source data/1.BMSCs/result/2.quality_control/2.1.fastqc/C2.cleandata.qual.pdf]

# Base distribution of C3

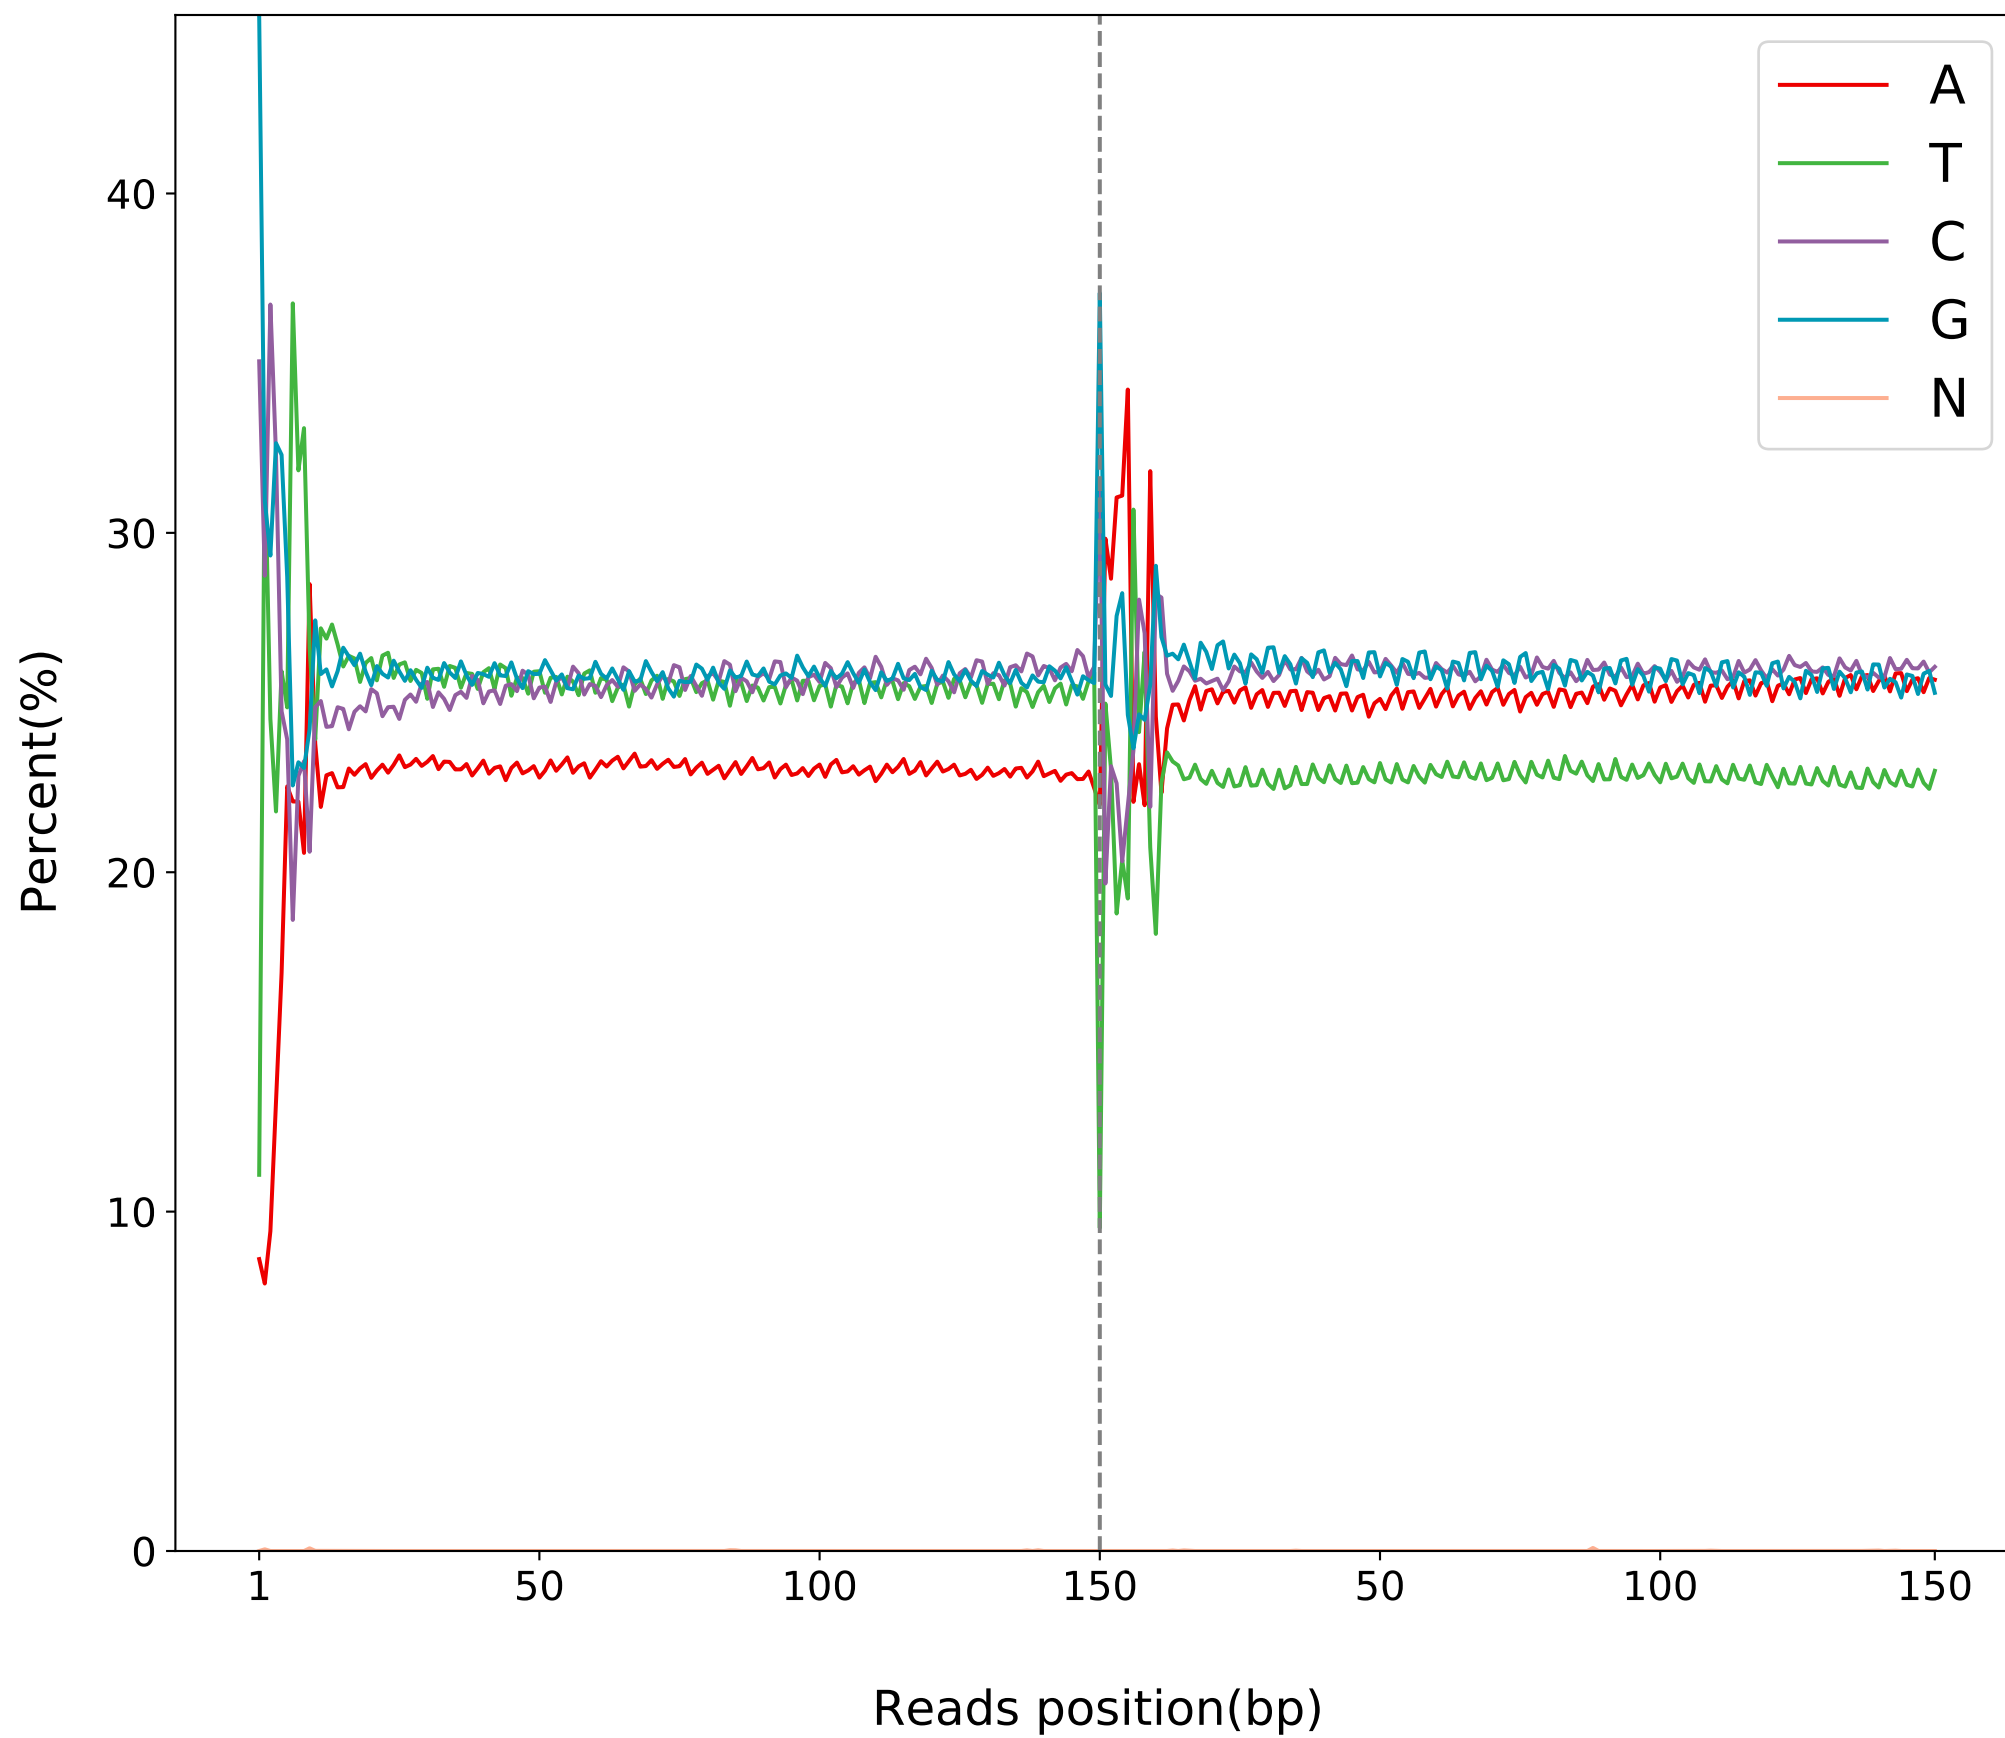

Supplement: Supplementary file 261 [file C3.cleandata.base.pdf › Source data/1.RNA-Seq source data/1.BMSCs/result/2.quality_control/2.1.fastqc/C3.cleandata.base.pdf]

# Quality distribution of C3

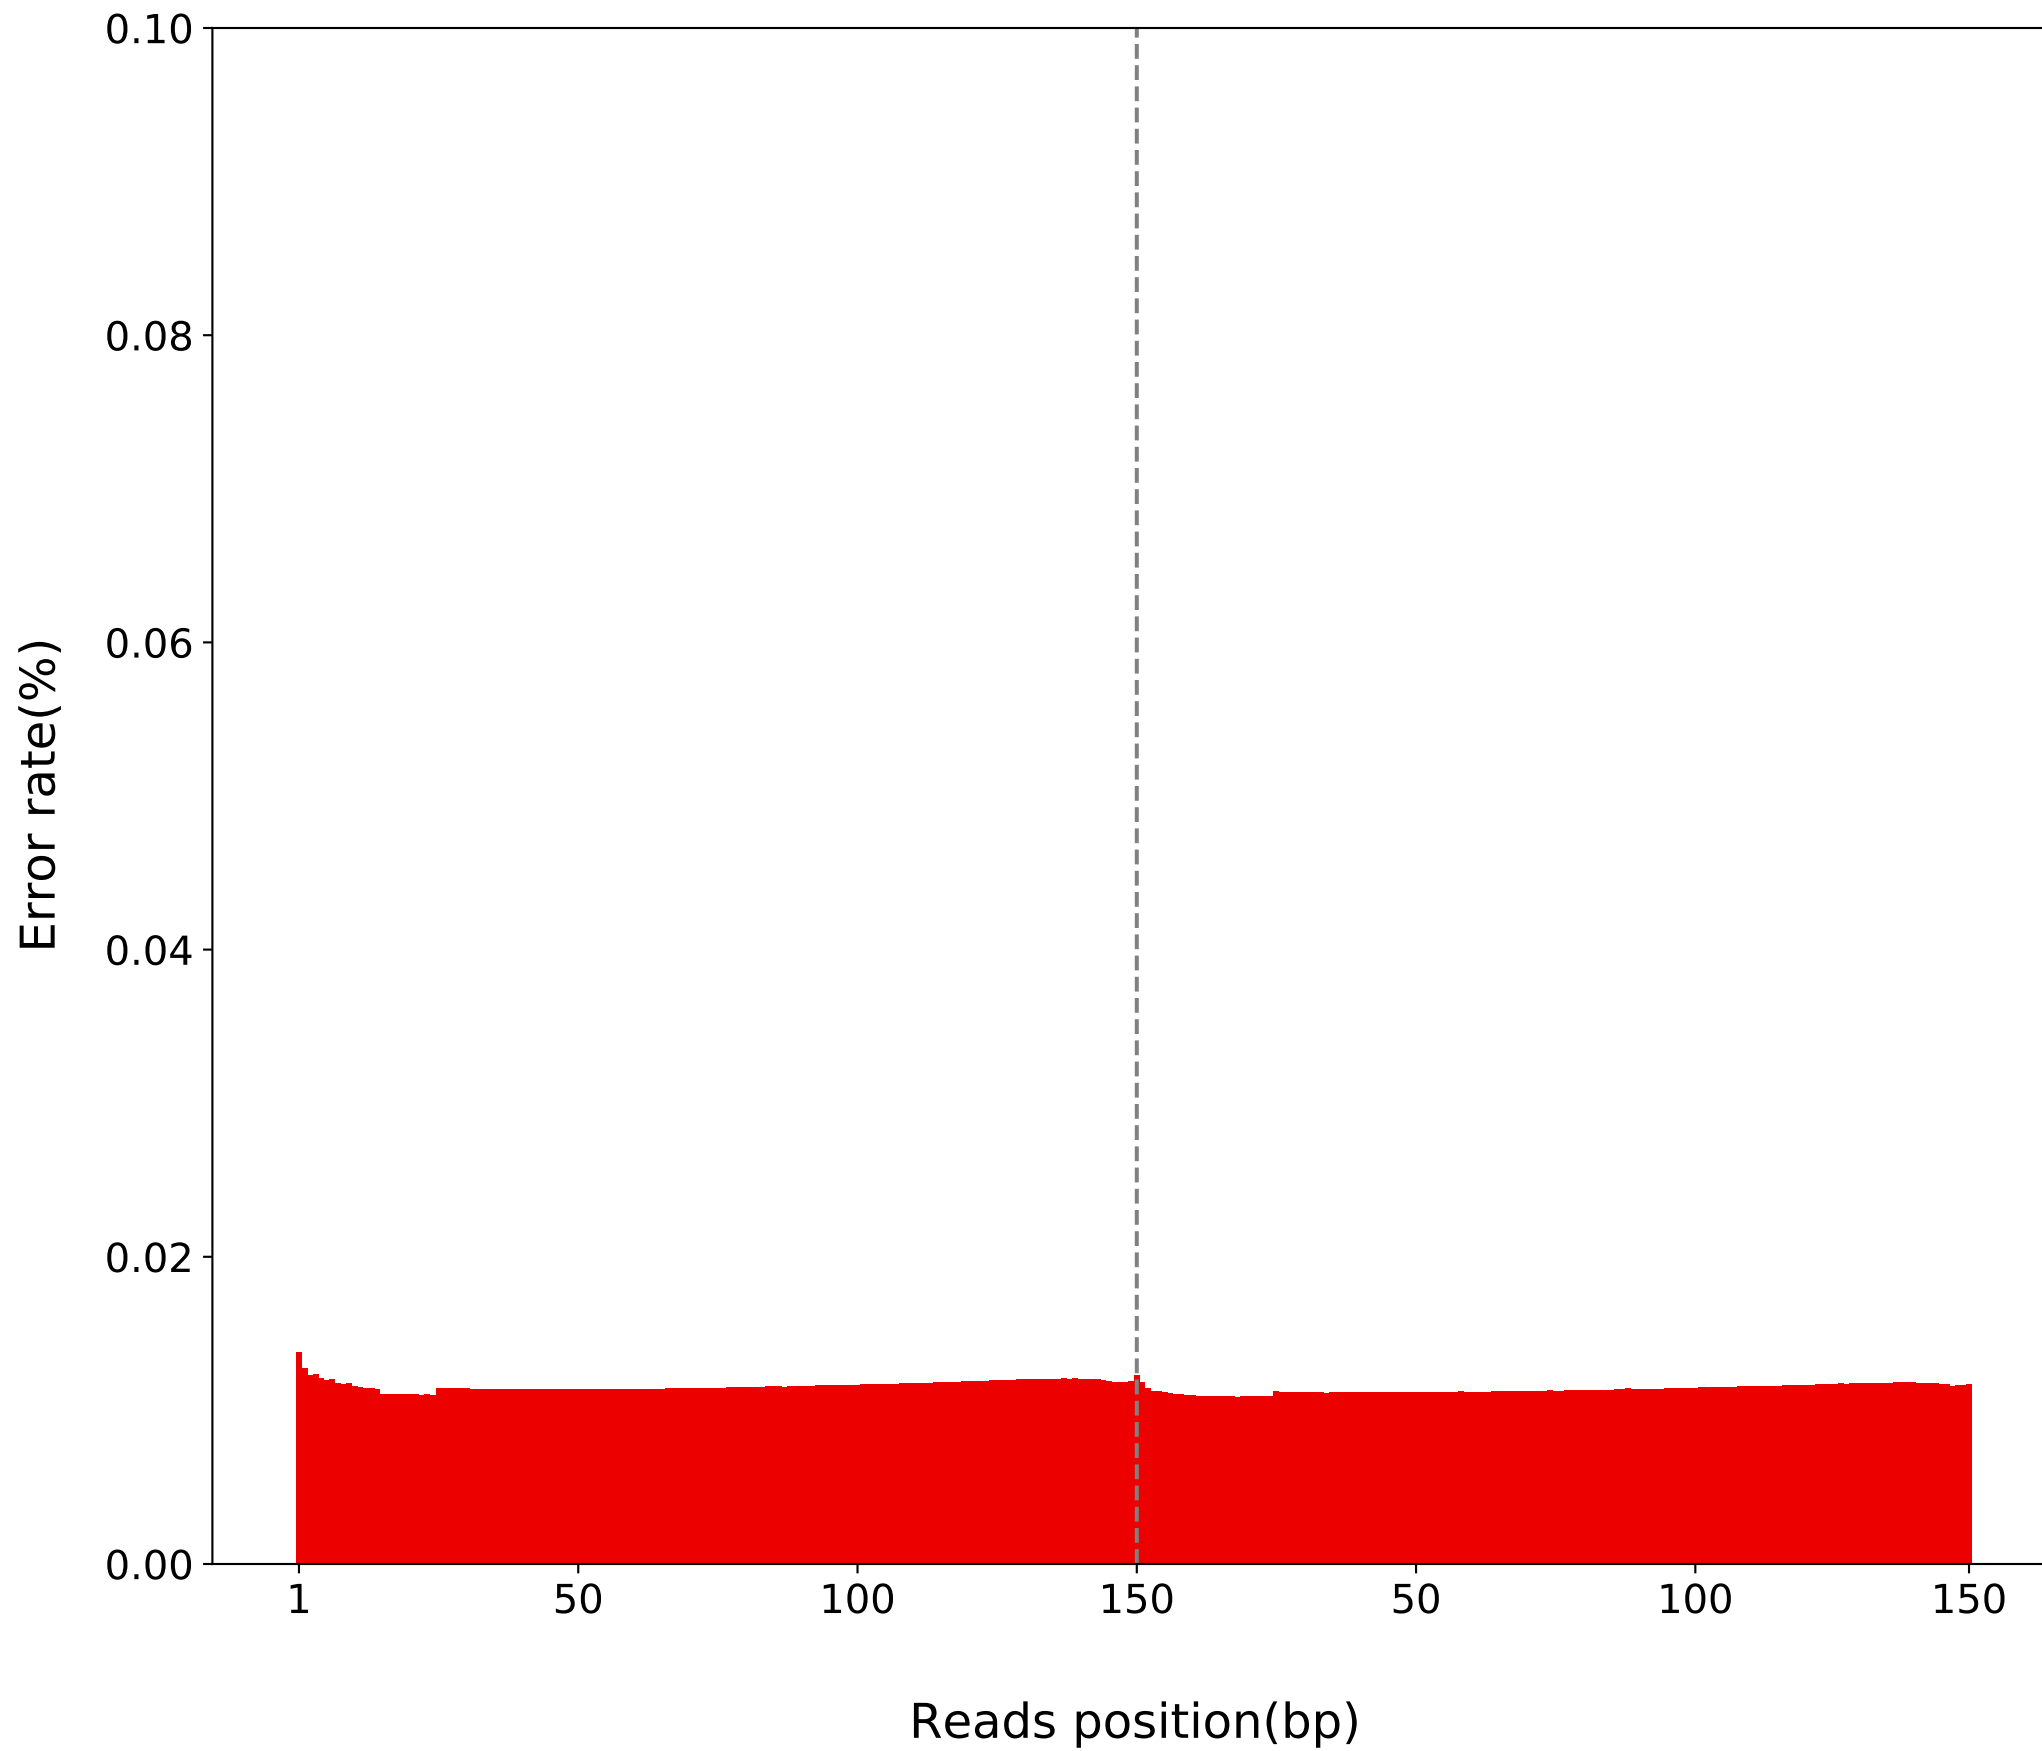

Supplement: Supplementary file 262 [file C3.cleandata.qual.pdf › Source data/1.RNA-Seq source data/1.BMSCs/result/2.quality_control/2.1.fastqc/C3.cleandata.qual.pdf]

# Base distribution of S1

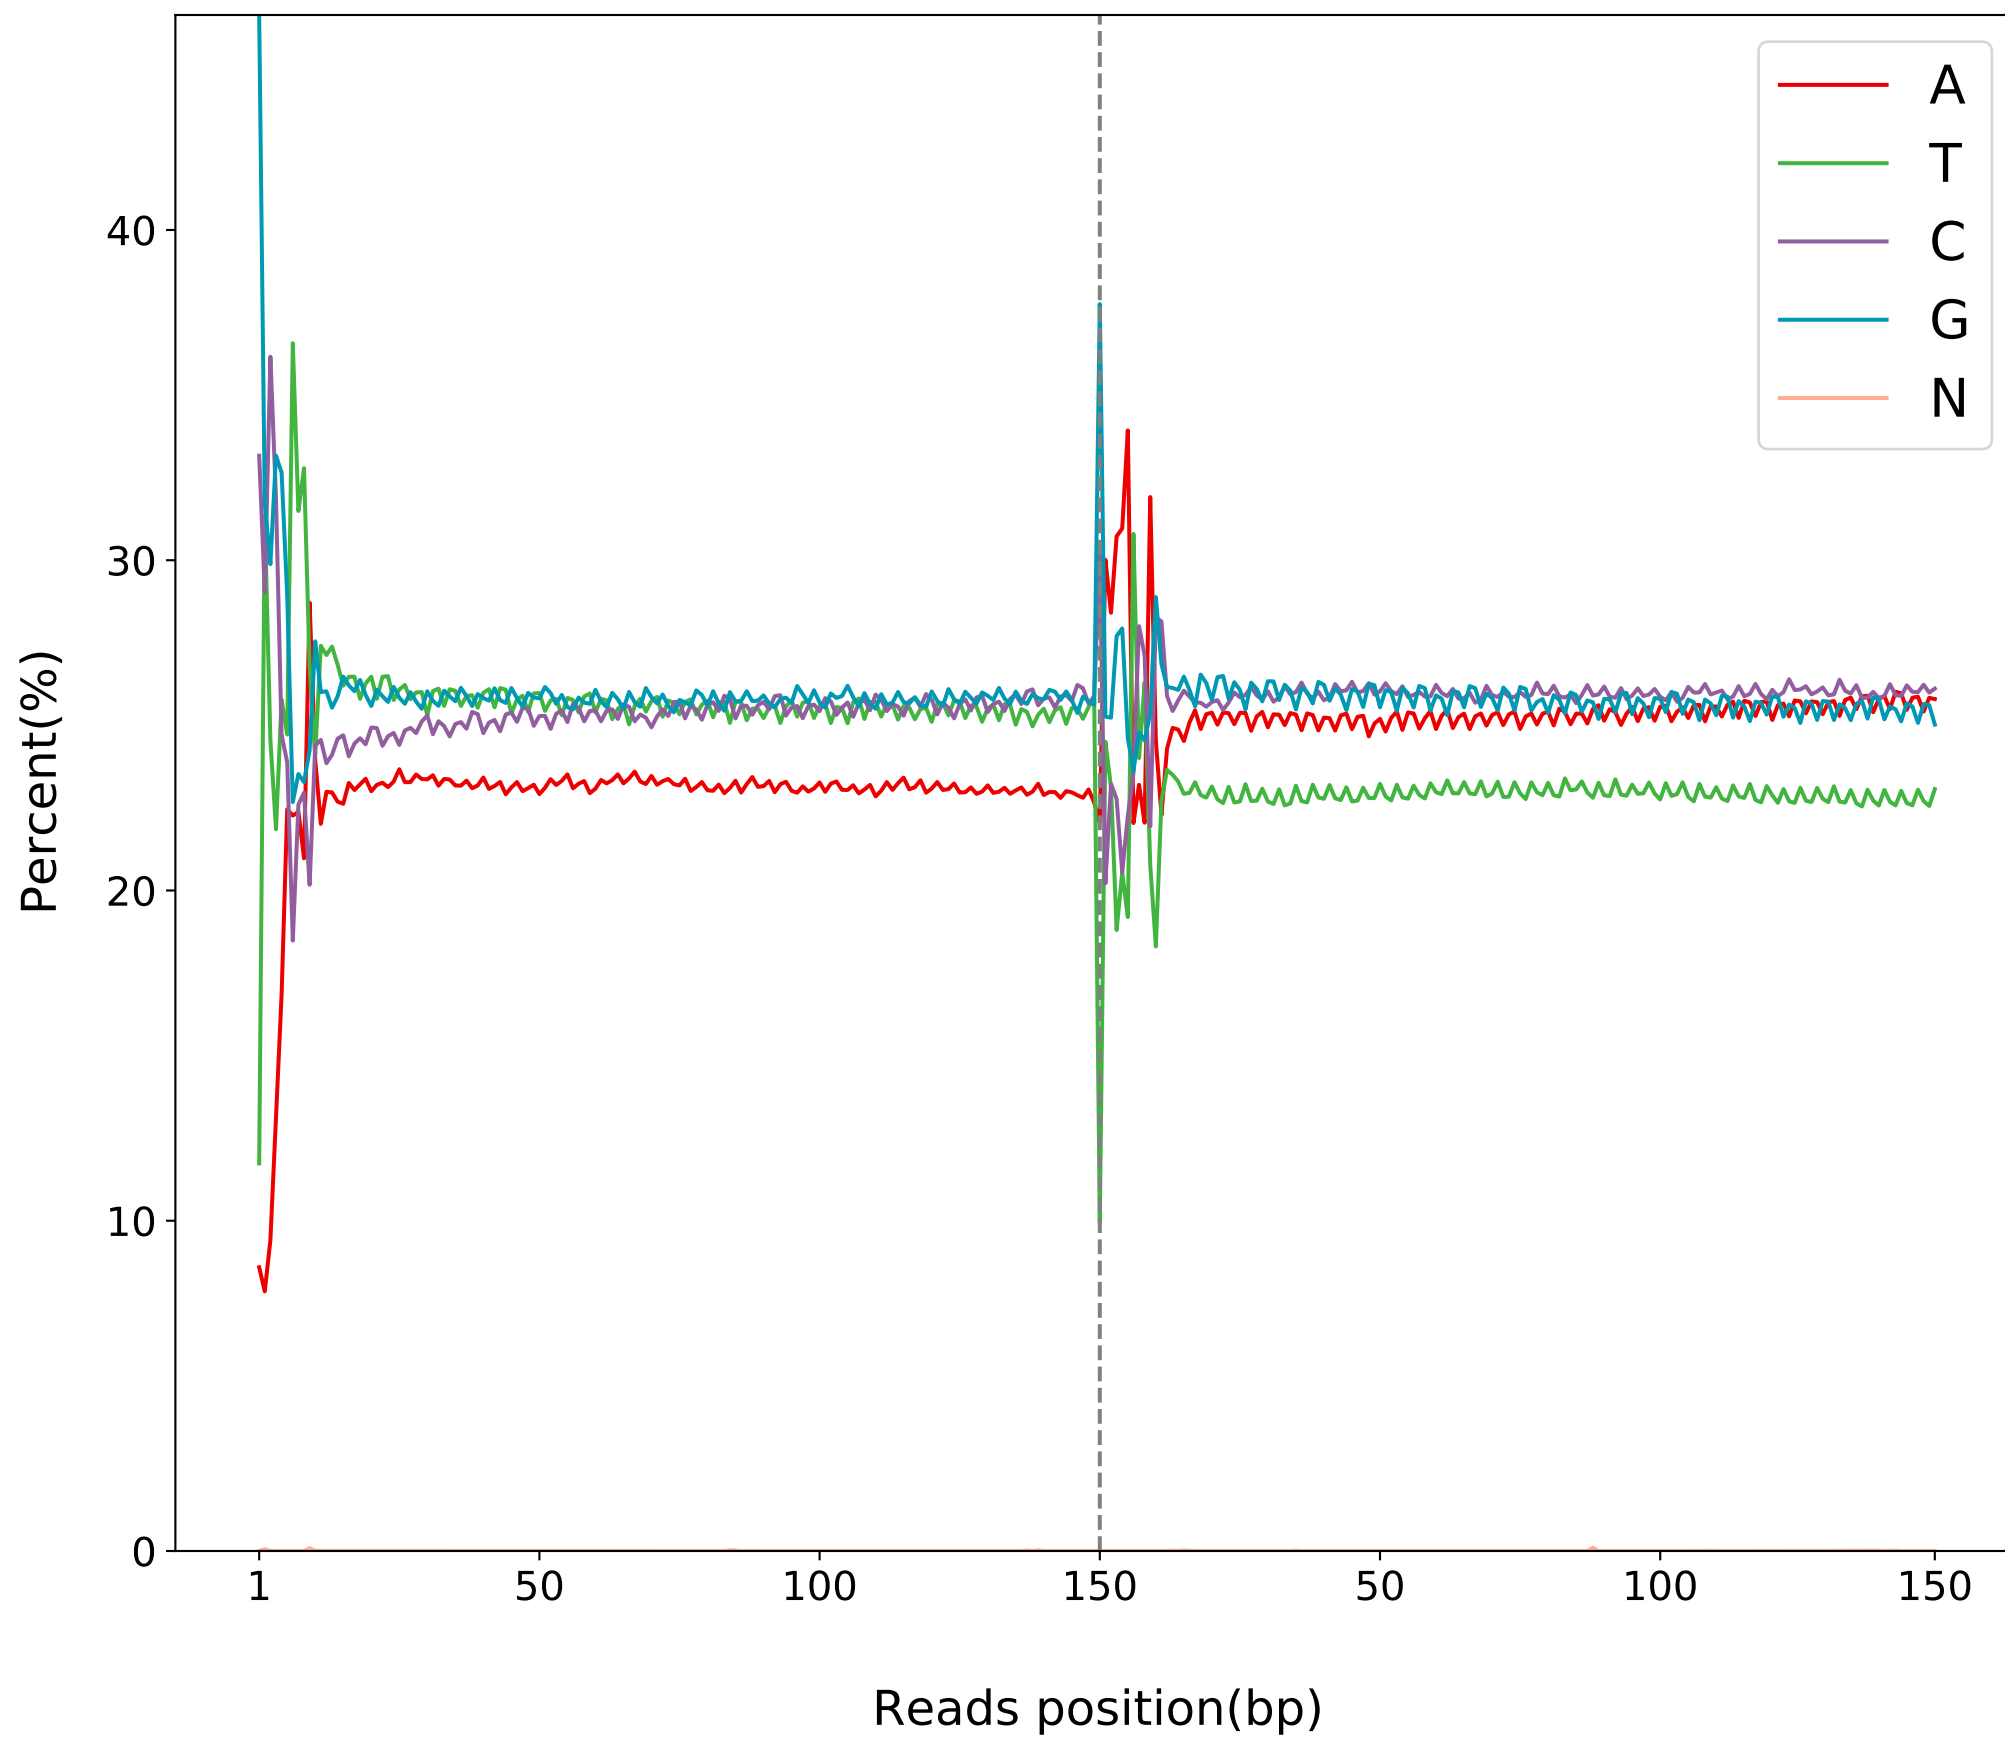

Supplement: Supplementary file 263 [file S1.cleandata.base.pdf › Source data/1.RNA-Seq source data/1.BMSCs/result/2.quality_control/2.1.fastqc/S1.cleandata.base.pdf]

# Quality distribution of S1

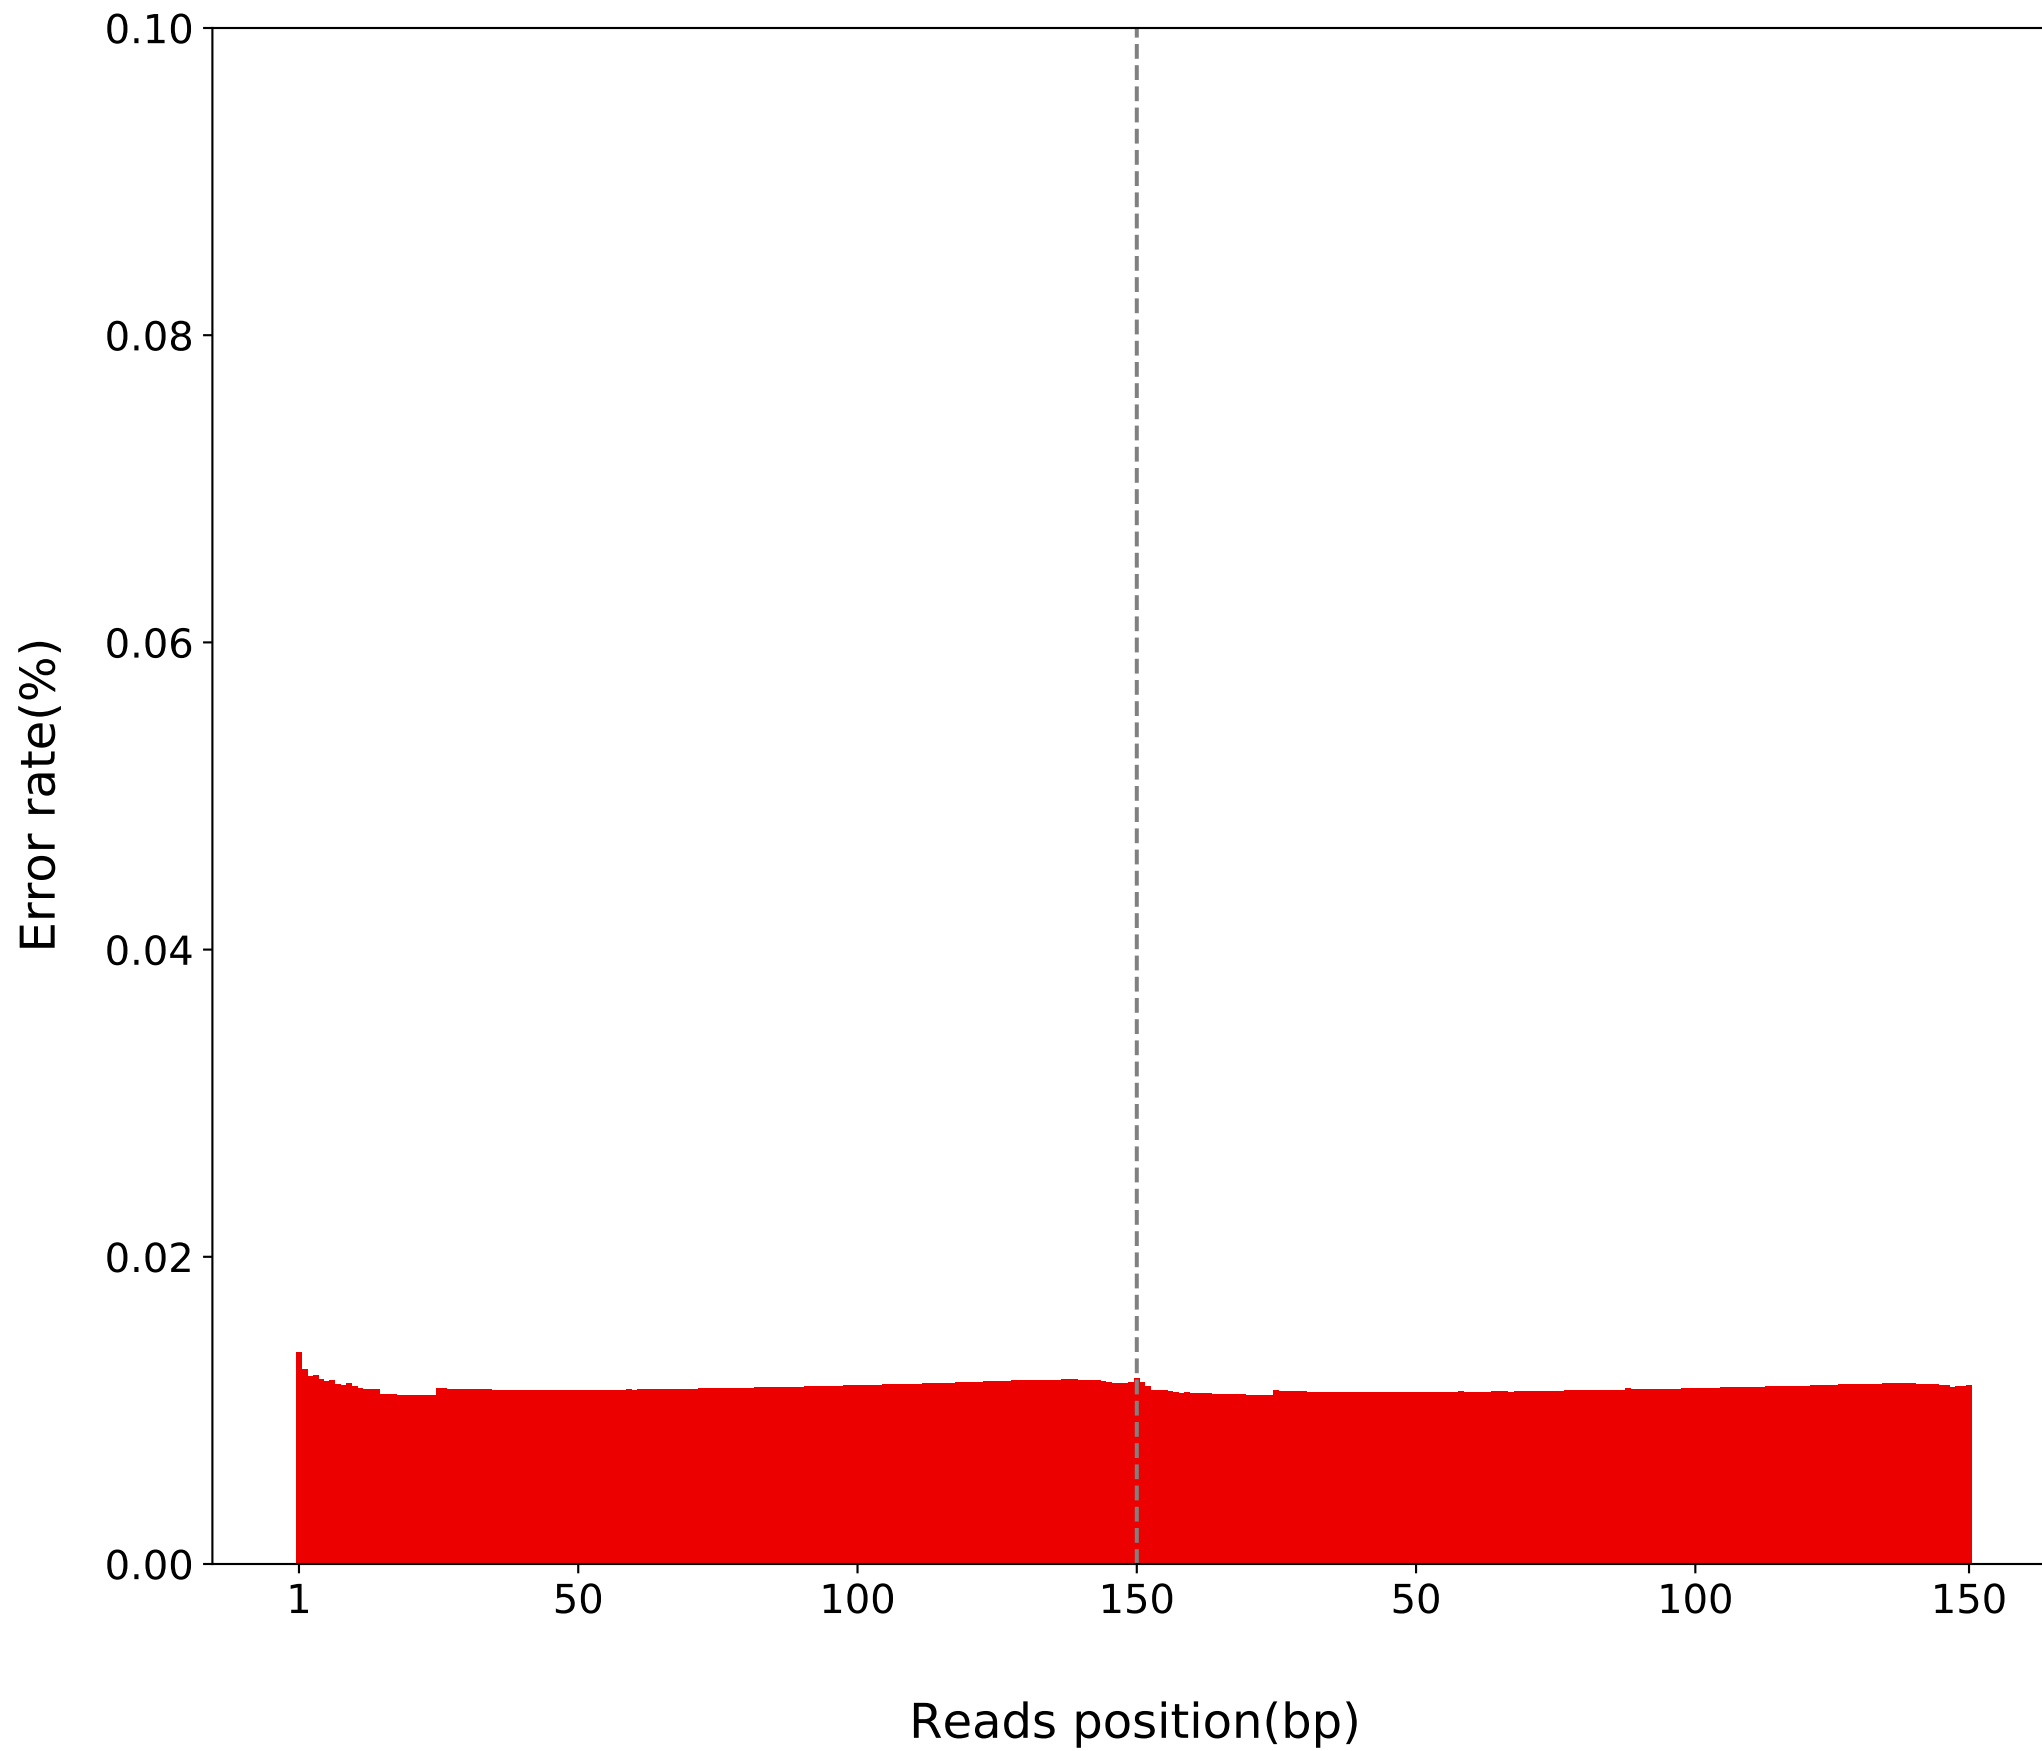

Supplement: Supplementary file 264 [file S1.cleandata.qual.pdf › Source data/1.RNA-Seq source data/1.BMSCs/result/2.quality_control/2.1.fastqc/S1.cleandata.qual.pdf]

# Base distribution of S2

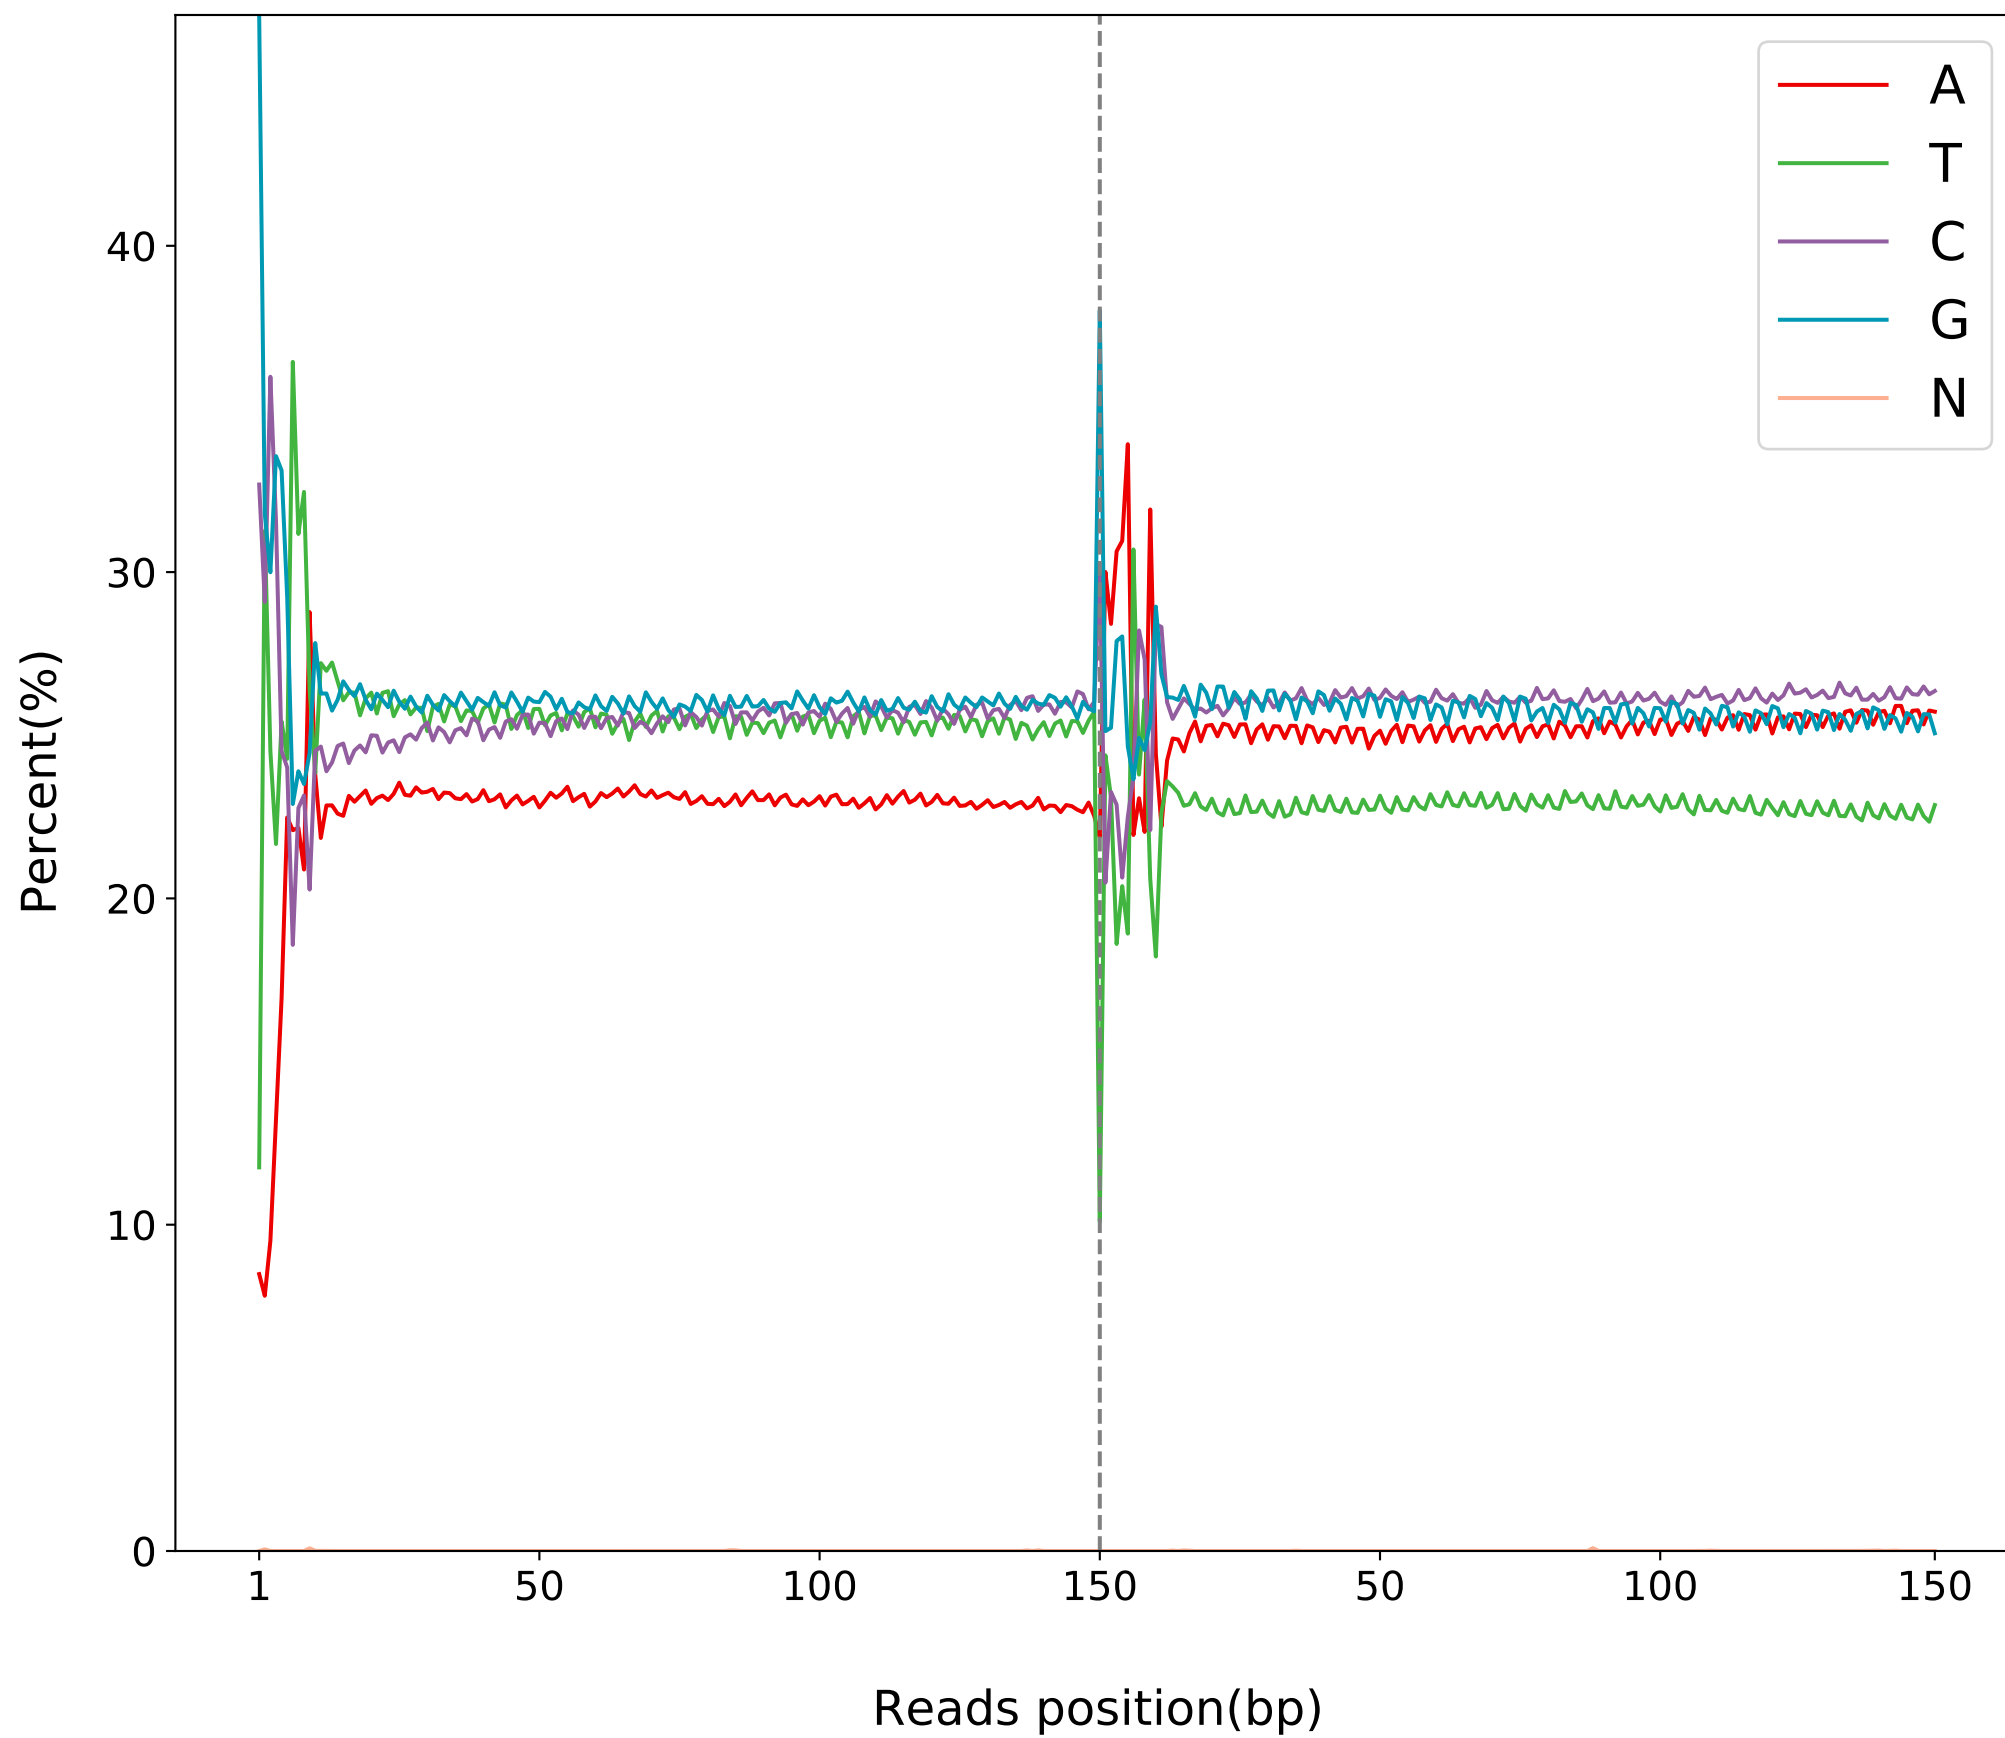

Supplement: Supplementary file 265 [file S2.cleandata.base.pdf › Source data/1.RNA-Seq source data/1.BMSCs/result/2.quality_control/2.1.fastqc/S2.cleandata.base.pdf]

## Quality distribution of S2

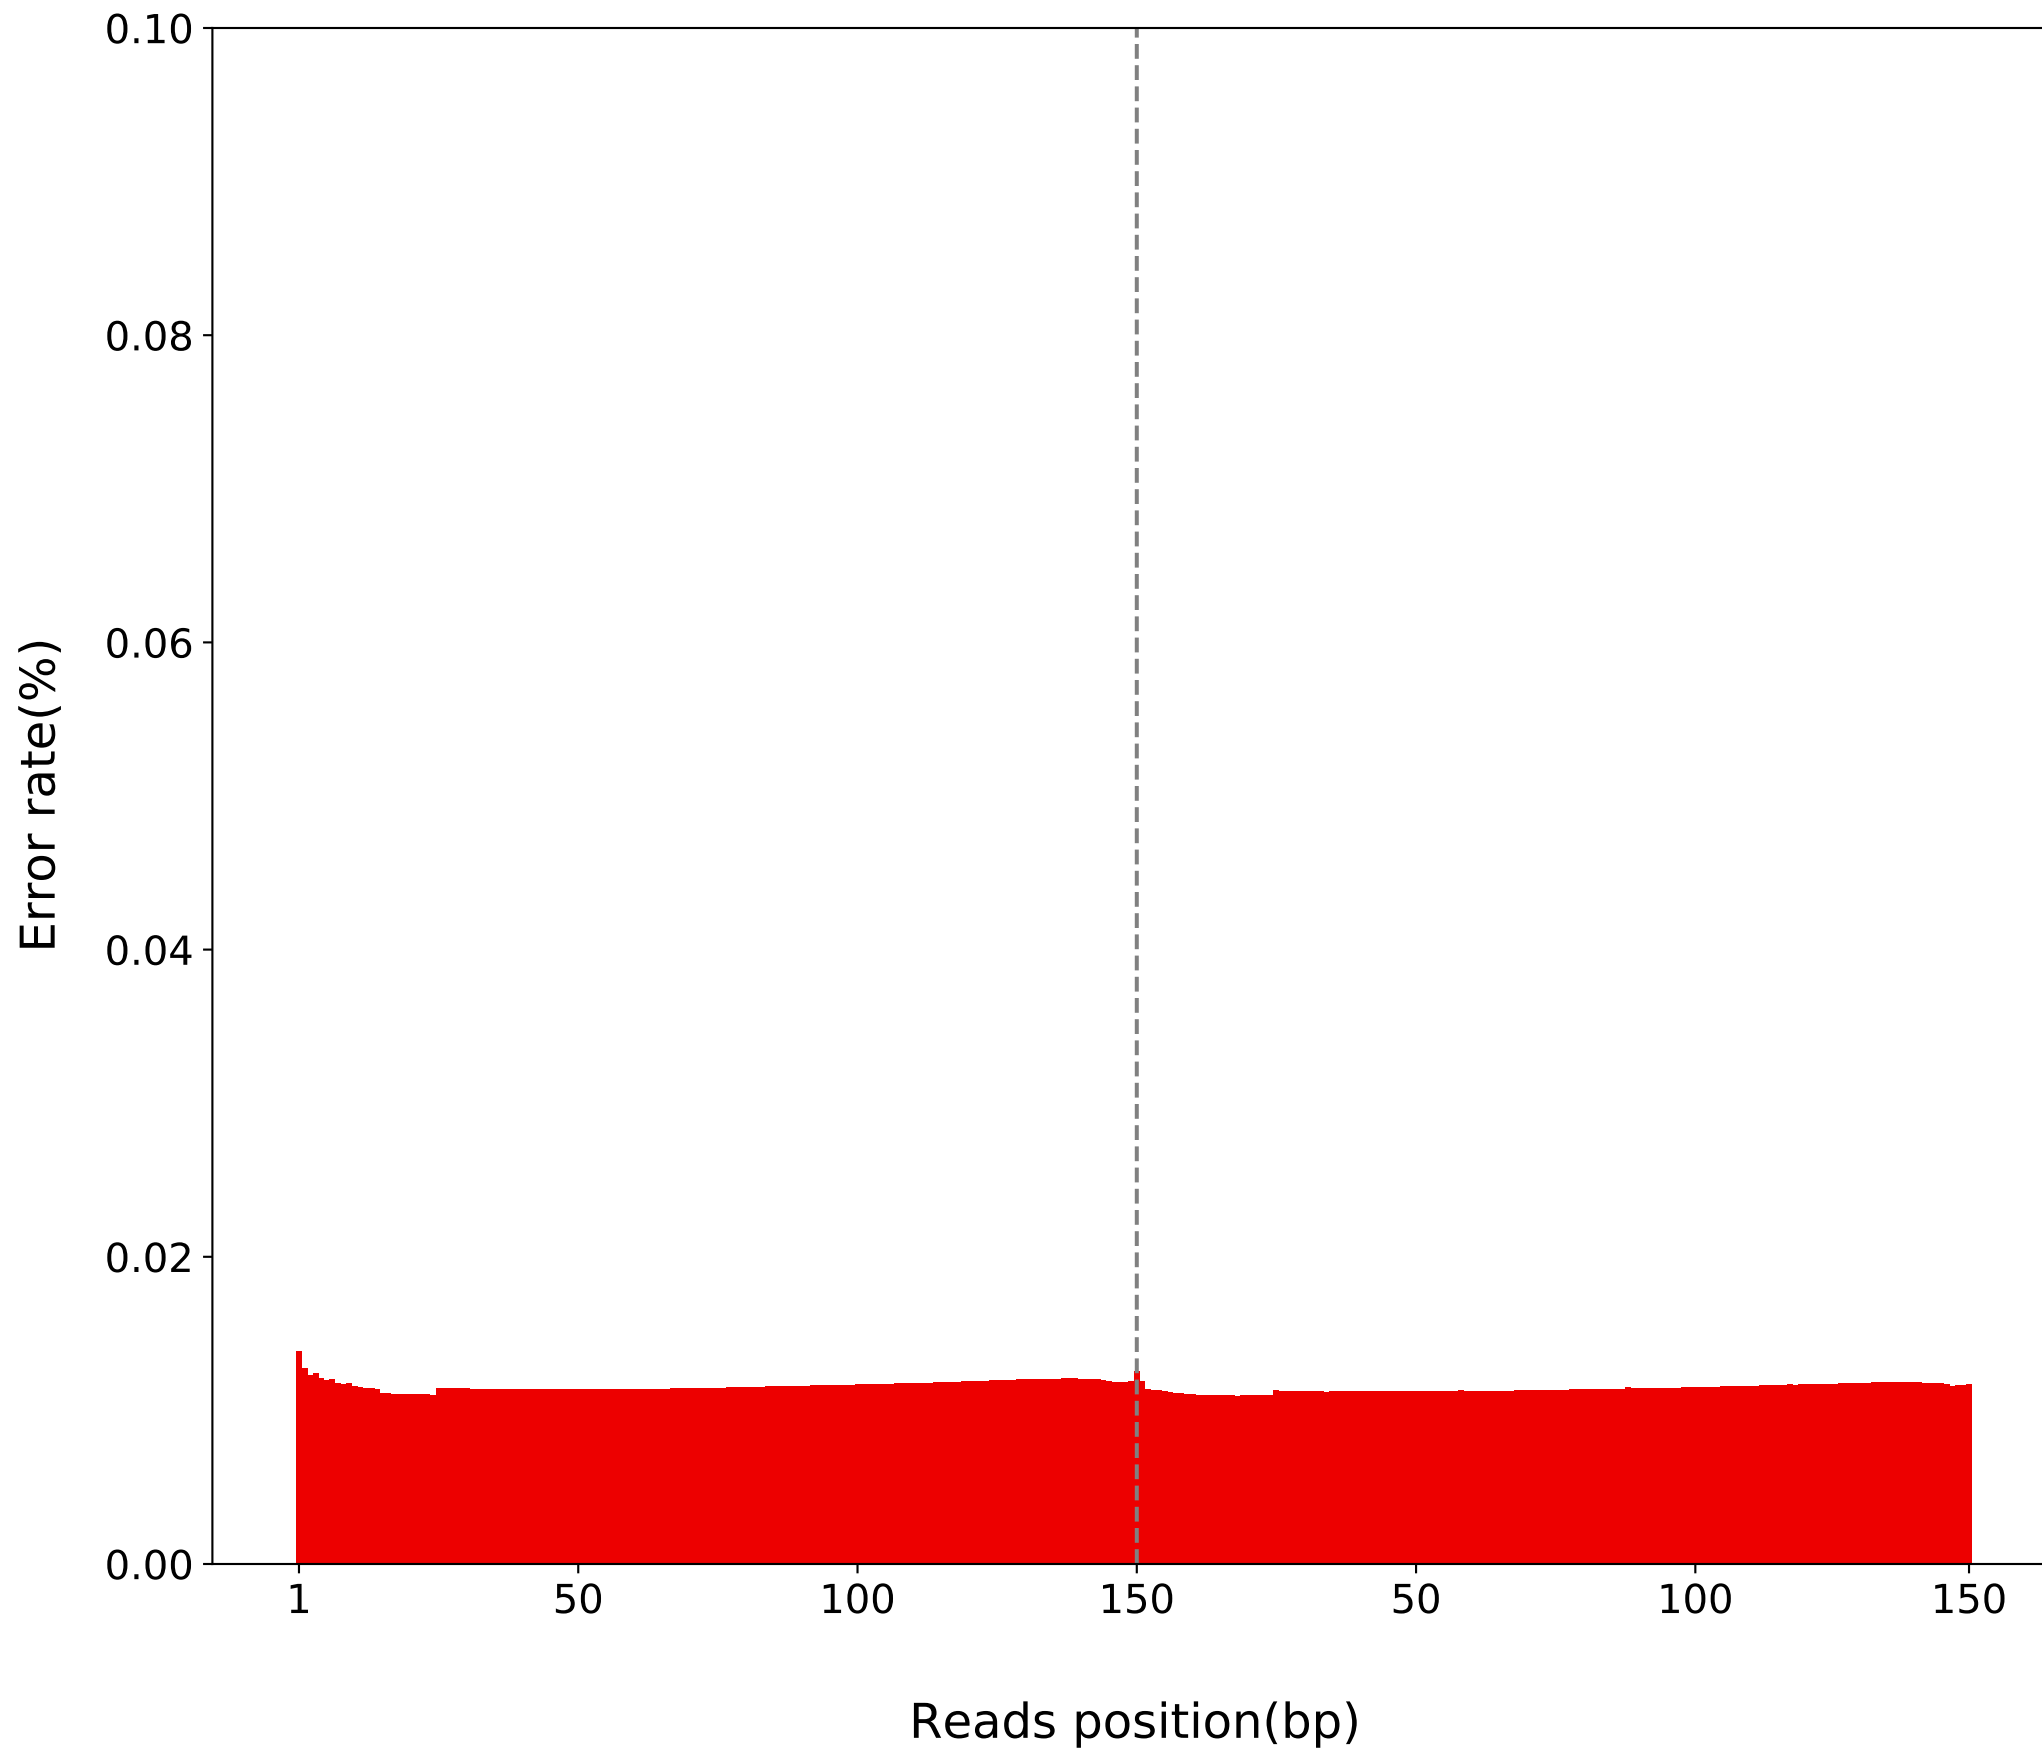

Supplement: Supplementary file 266 [file S2.cleandata.qual.pdf › Source data/1.RNA-Seq source data/1.BMSCs/result/2.quality_control/2.1.fastqc/S2.cleandata.qual.pdf]

# Base distribution of S3

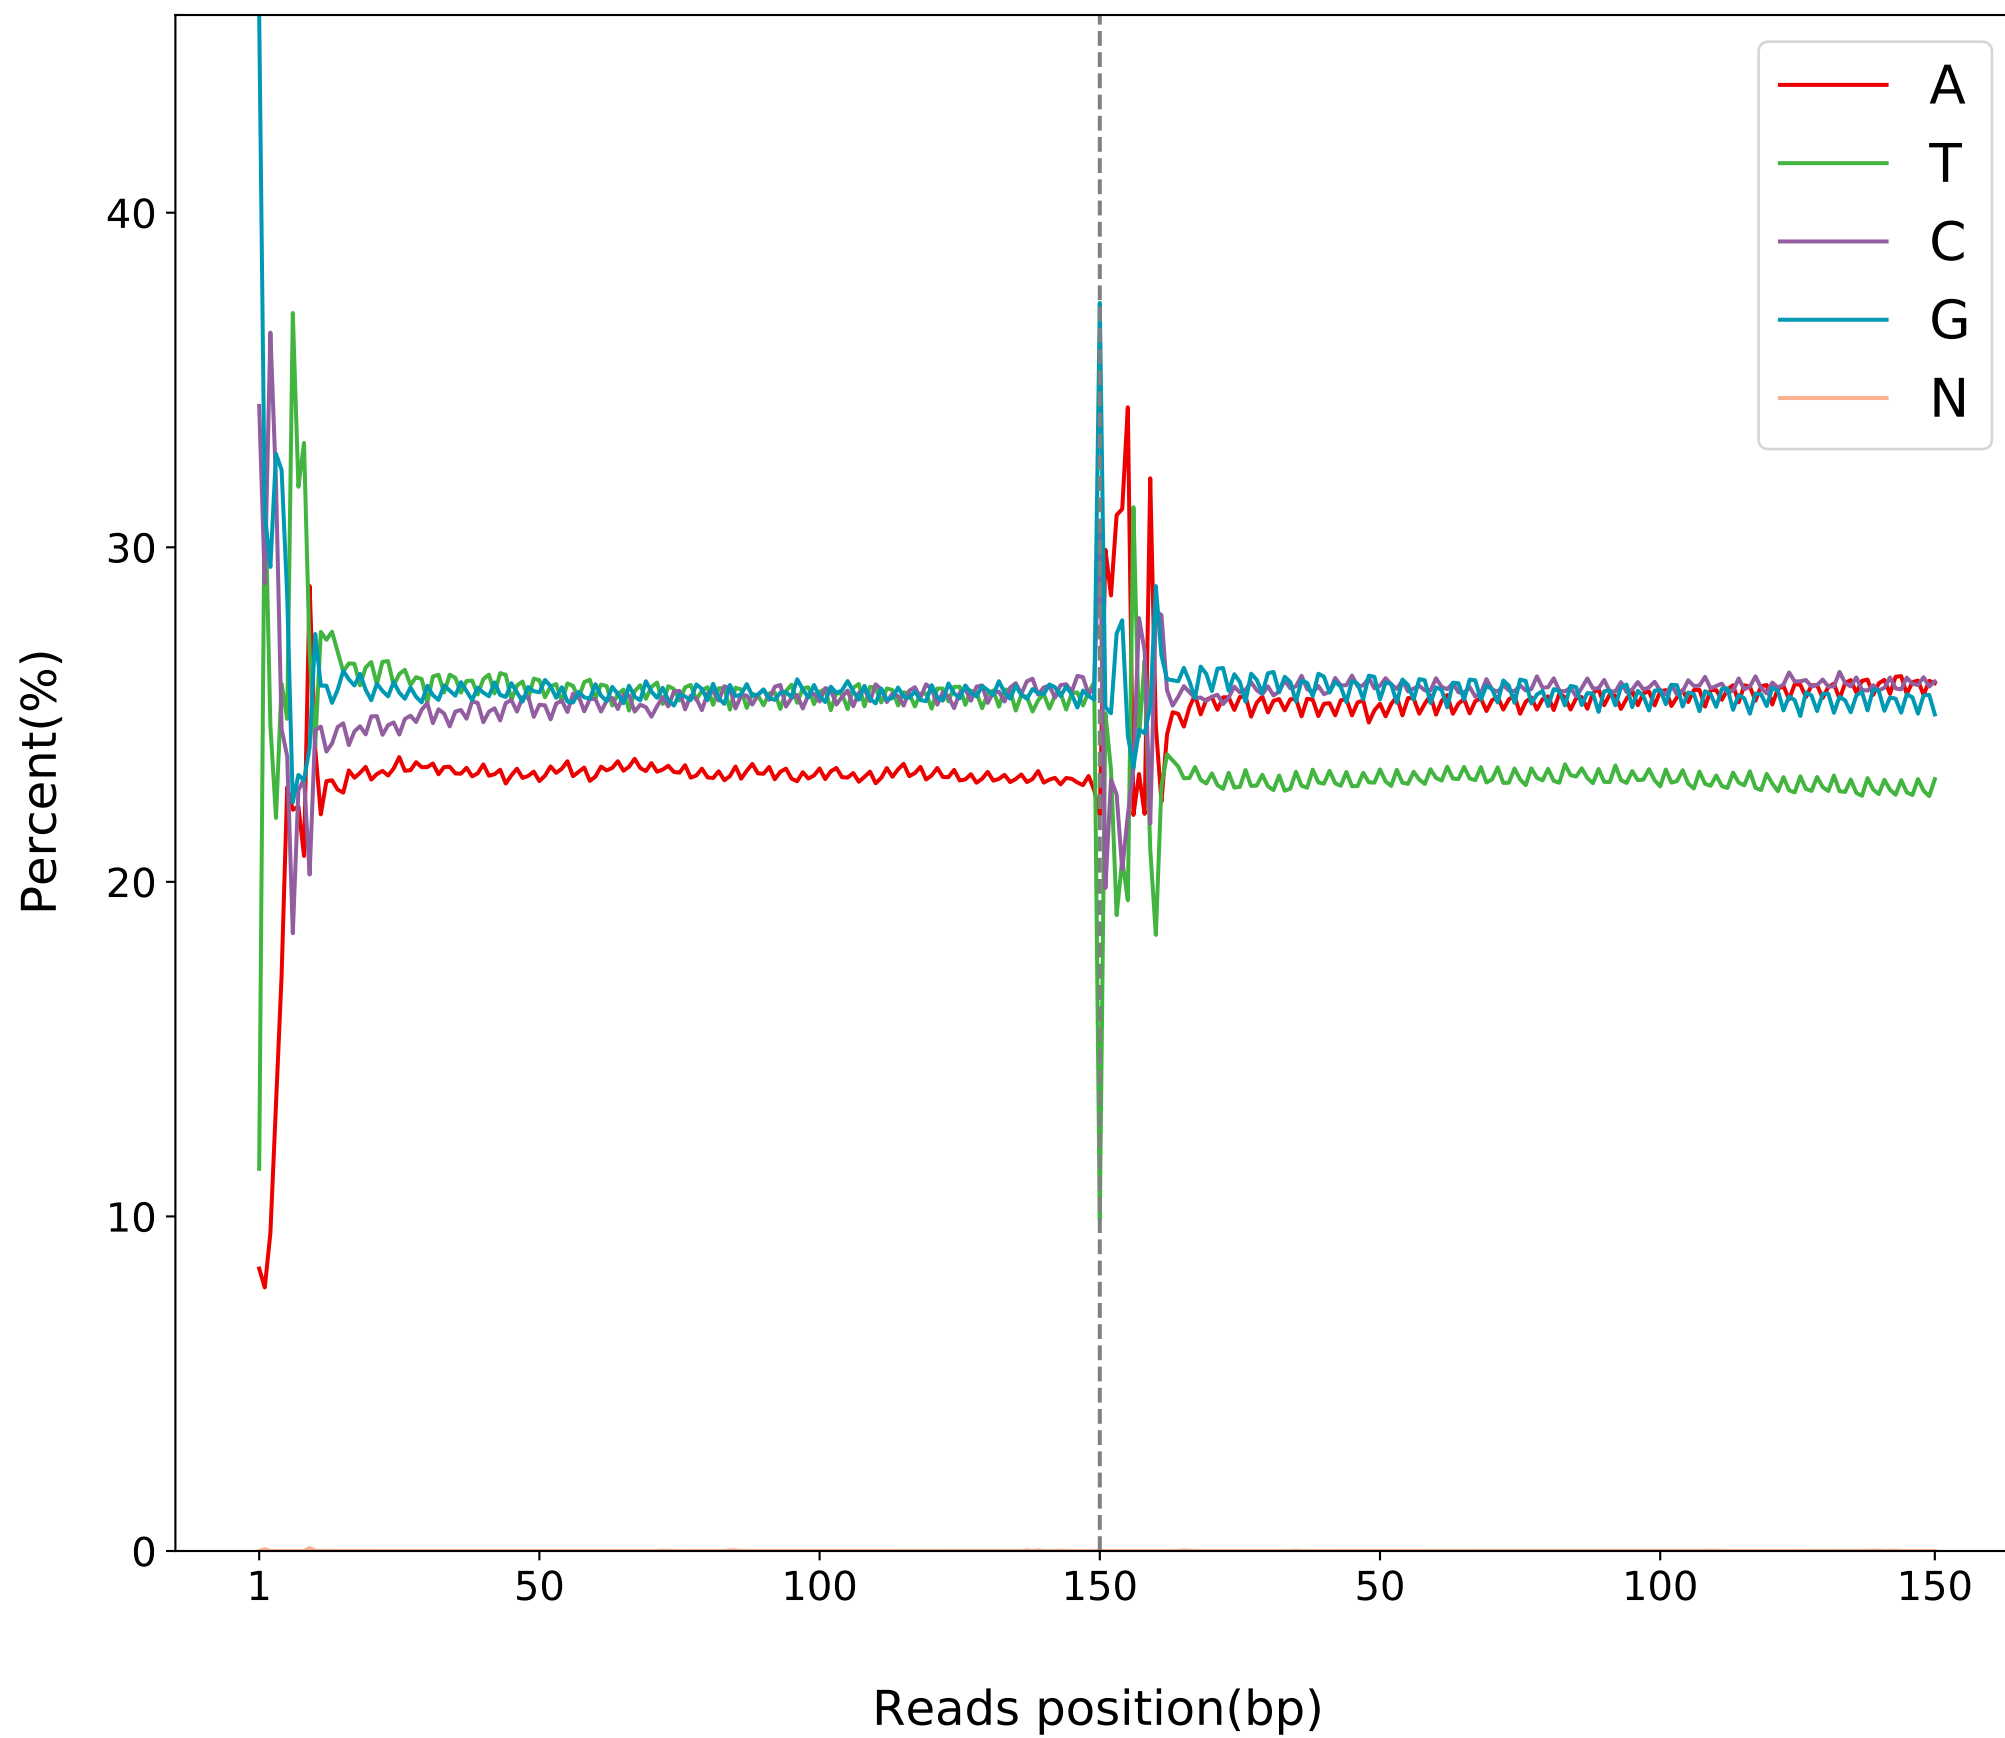

Supplement: Supplementary file 267 [file S3.cleandata.base.pdf › Source data/1.RNA-Seq source data/1.BMSCs/result/2.quality_control/2.1.fastqc/S3.cleandata.base.pdf]

# Quality distribution of S3

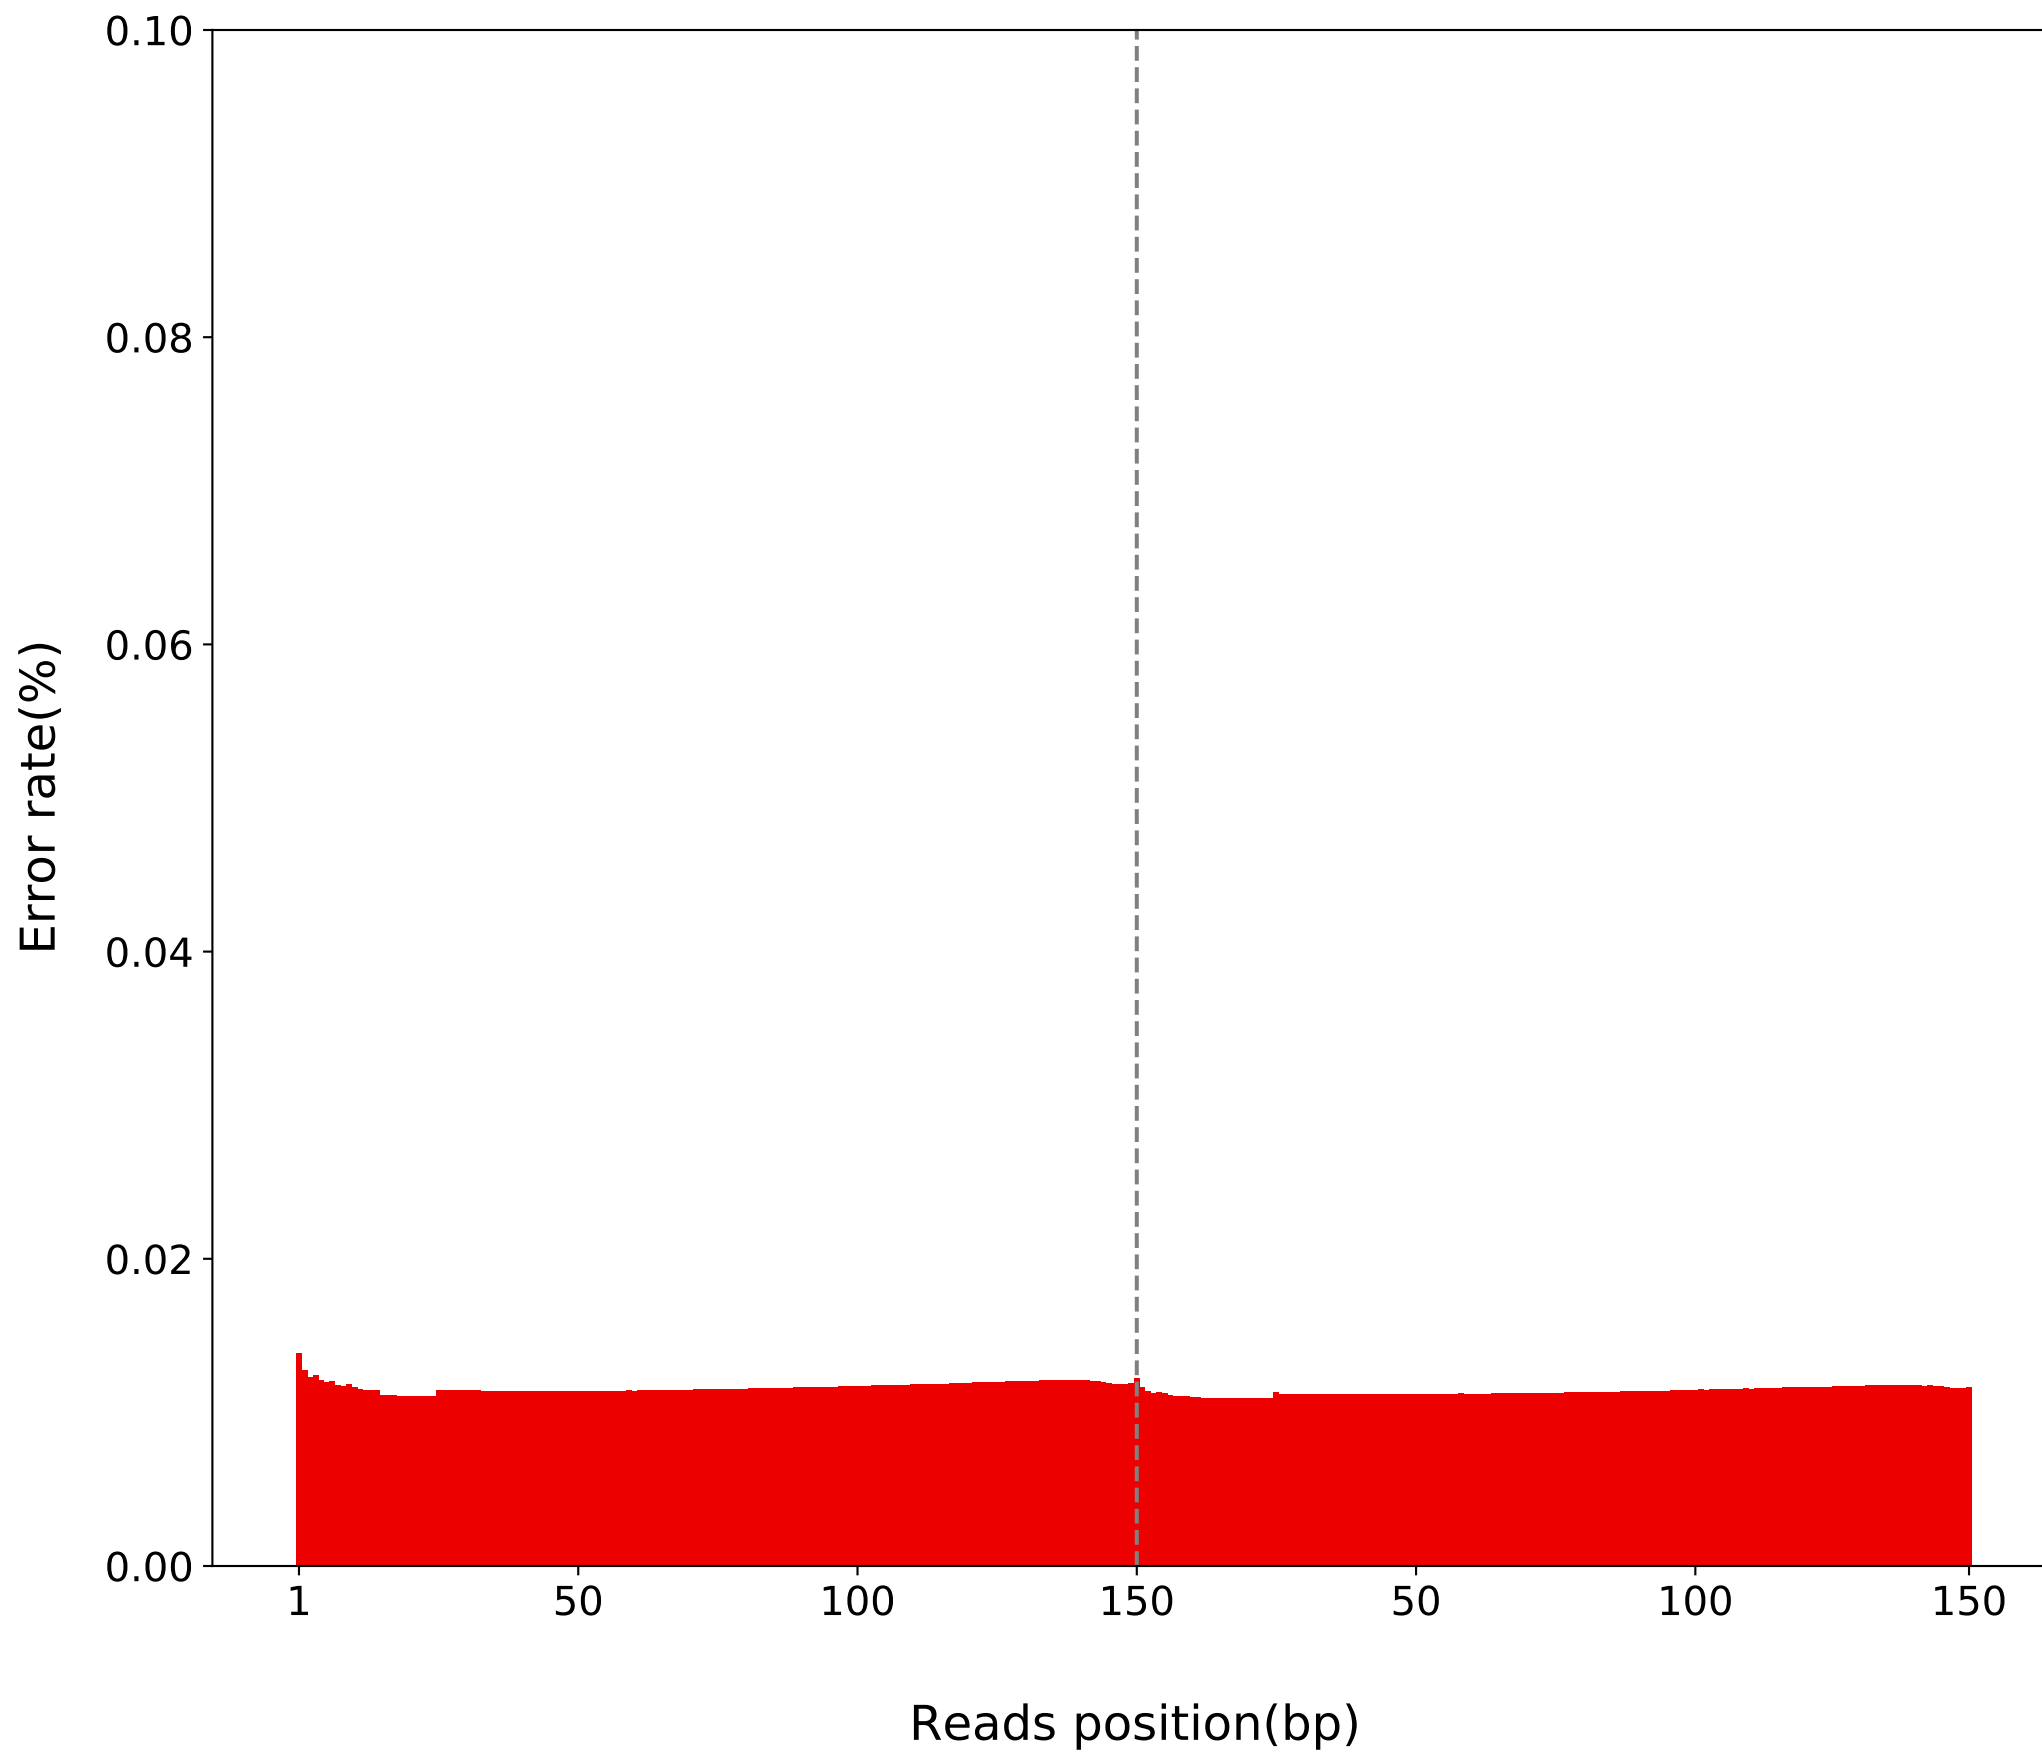

Supplement: Supplementary file 268 [file S3.cleandata.qual.pdf › Source data/1.RNA-Seq source data/1.BMSCs/result/2.quality_control/2.1.fastqc/S3.cleandata.qual.pdf]

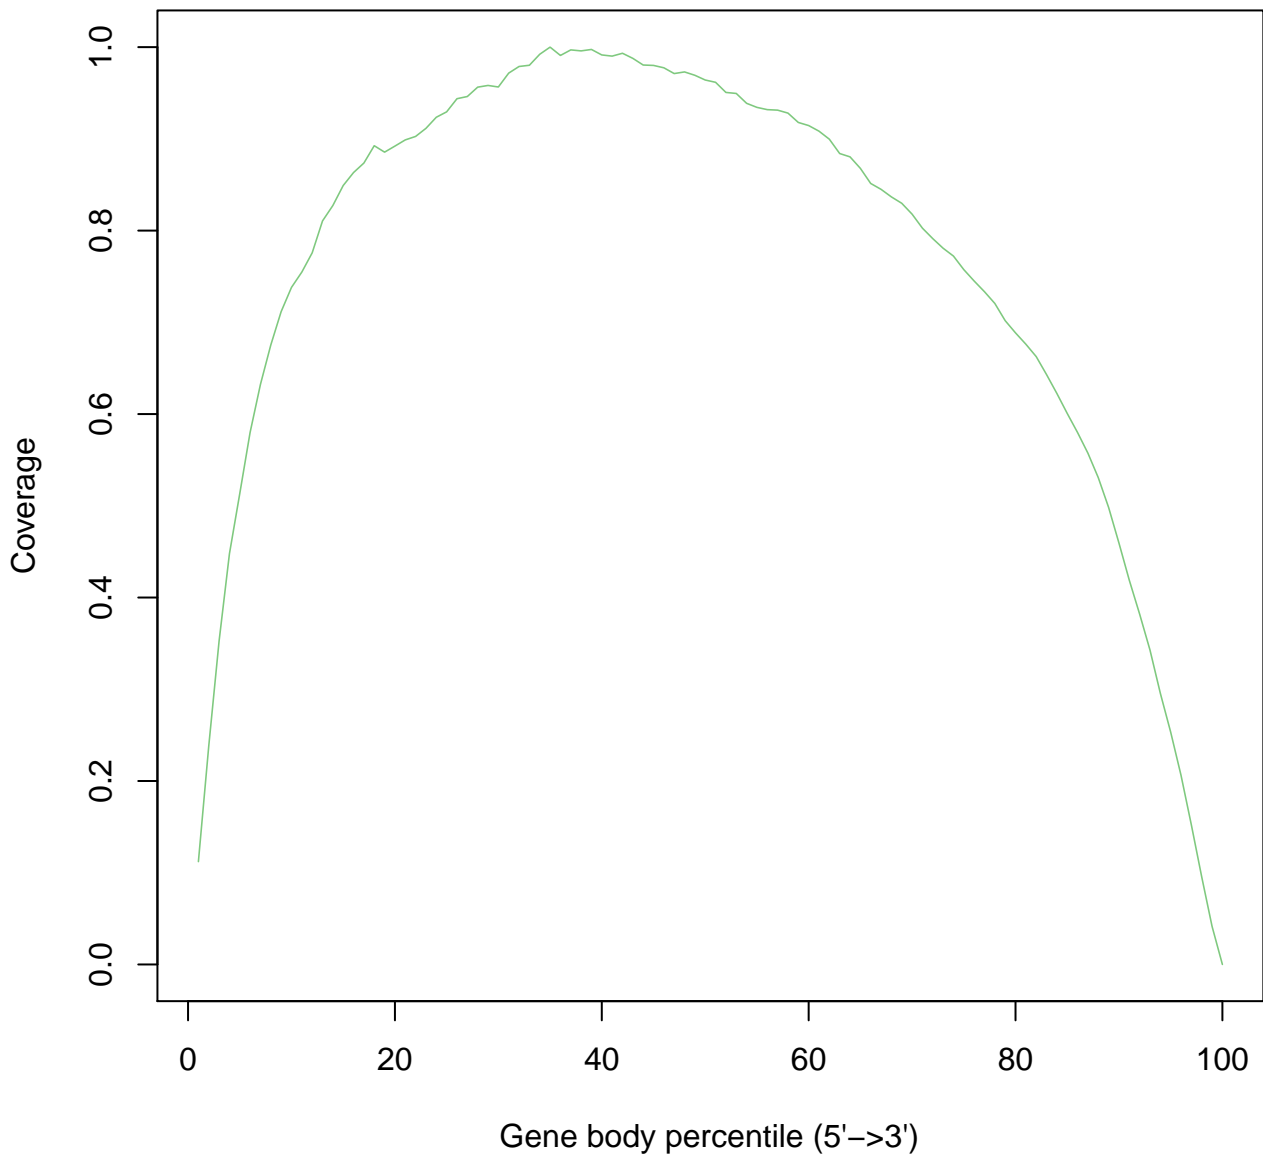

Supplement: Supplementary file 269 [file C1.coverage.geneBodyCoverage.curves.pdf › Source data/1.RNA-Seq source data/1.BMSCs/result/2.quality_control/2.2.rnaseq_qc/C1.coverage.geneBodyCoverage.curves.pdf]

read\_distribution(C1)

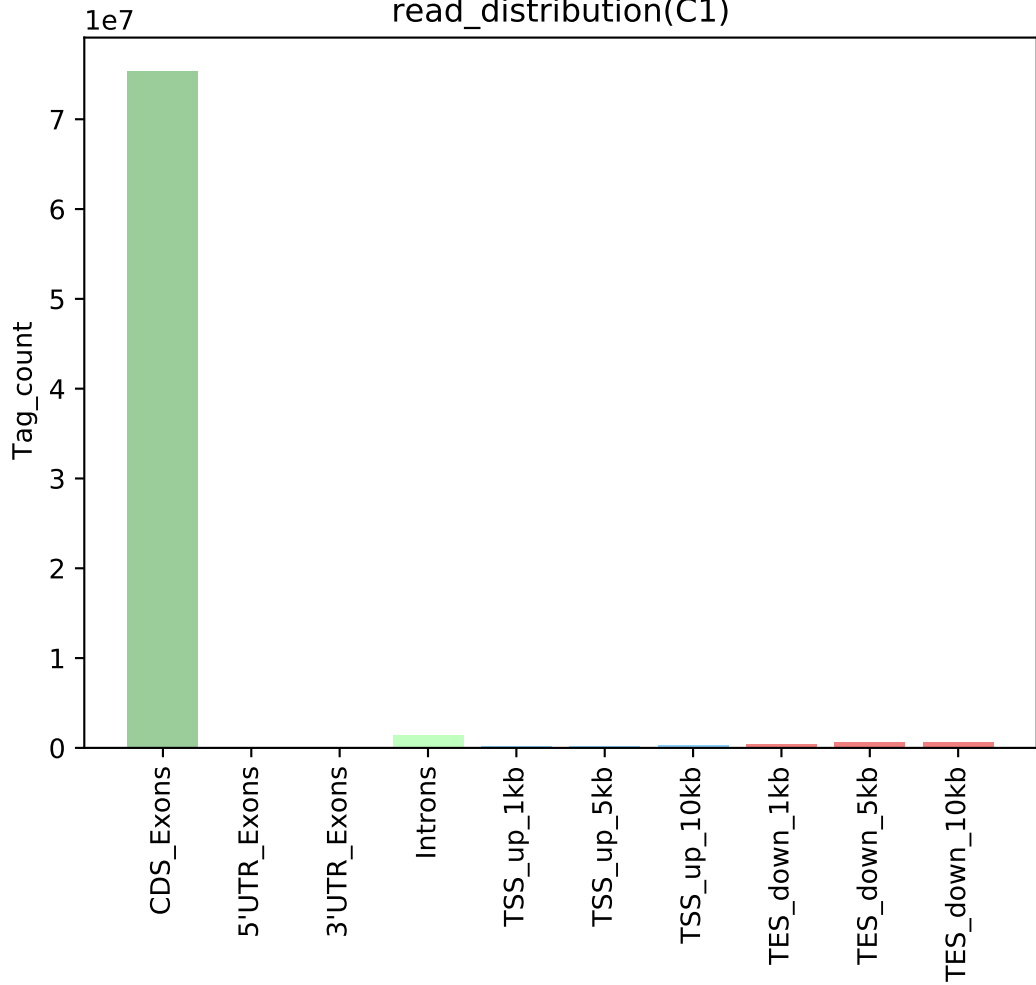

Supplement: Supplementary file 270 [file C1.read_distribution.pdf › Source data/1.RNA-Seq source data/1.BMSCs/result/2.quality_control/2.2.rnaseq_qc/C1.read_distribution.pdf]

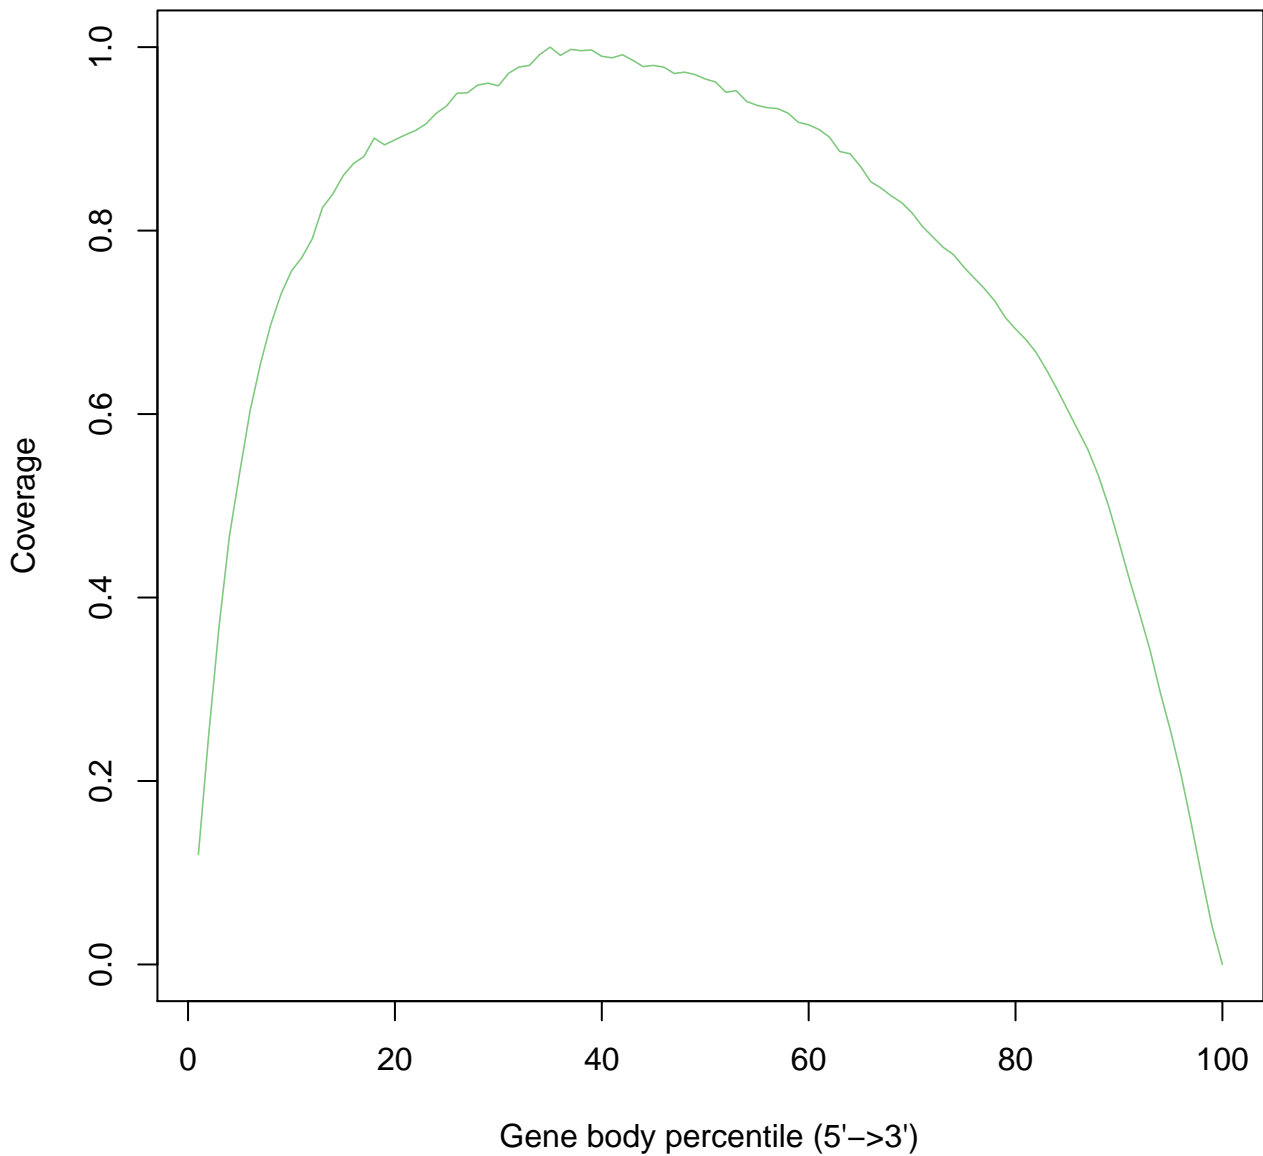

Supplement: Supplementary file 271 [file C2.coverage.geneBodyCoverage.curves.pdf › Source data/1.RNA-Seq source data/1.BMSCs/result/2.quality_control/2.2.rnaseq_qc/C2.coverage.geneBodyCoverage.curves.pdf]

read\_distribution(C2)

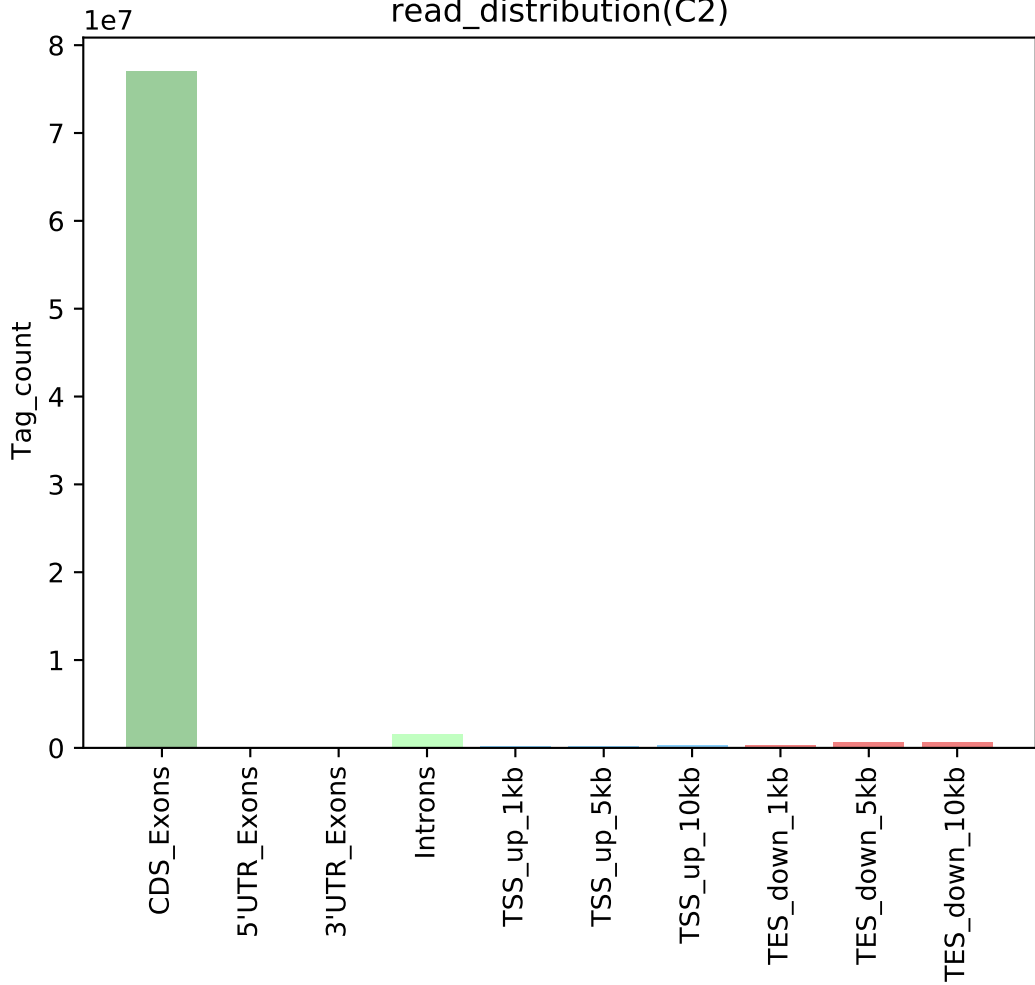

Supplement: Supplementary file 272 [file C2.read_distribution.pdf › Source data/1.RNA-Seq source data/1.BMSCs/result/2.quality_control/2.2.rnaseq_qc/C2.read_distribution.pdf]

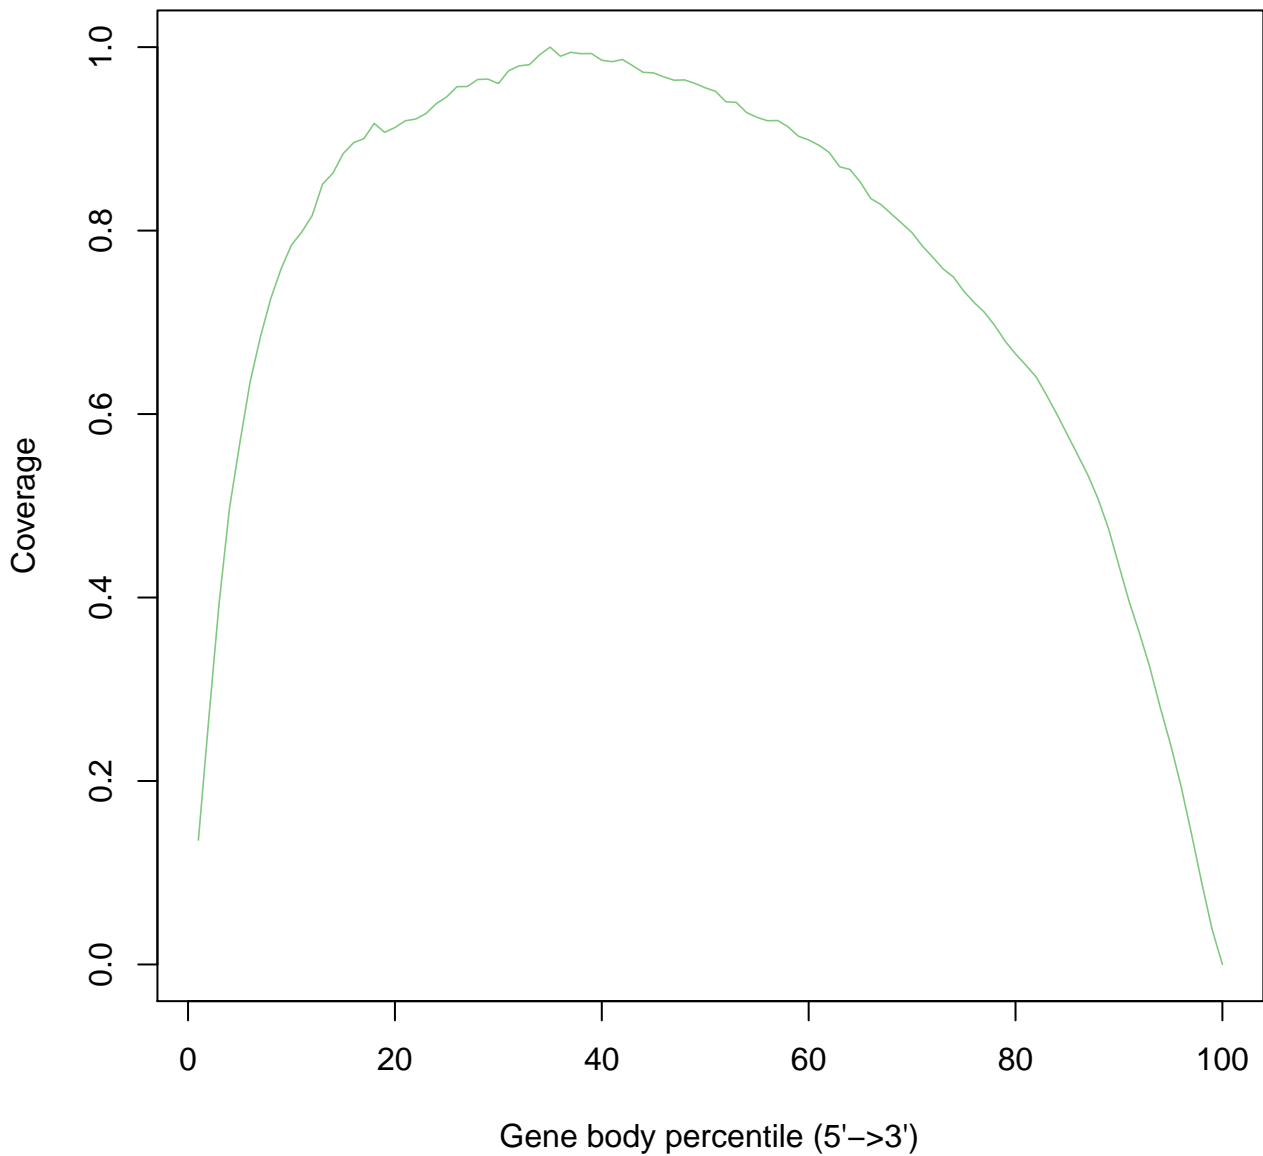

Supplement: Supplementary file 273 [file C3.coverage.geneBodyCoverage.curves.pdf › Source data/1.RNA-Seq source data/1.BMSCs/result/2.quality_control/2.2.rnaseq_qc/C3.coverage.geneBodyCoverage.curves.pdf]

read\_distribution(C3)

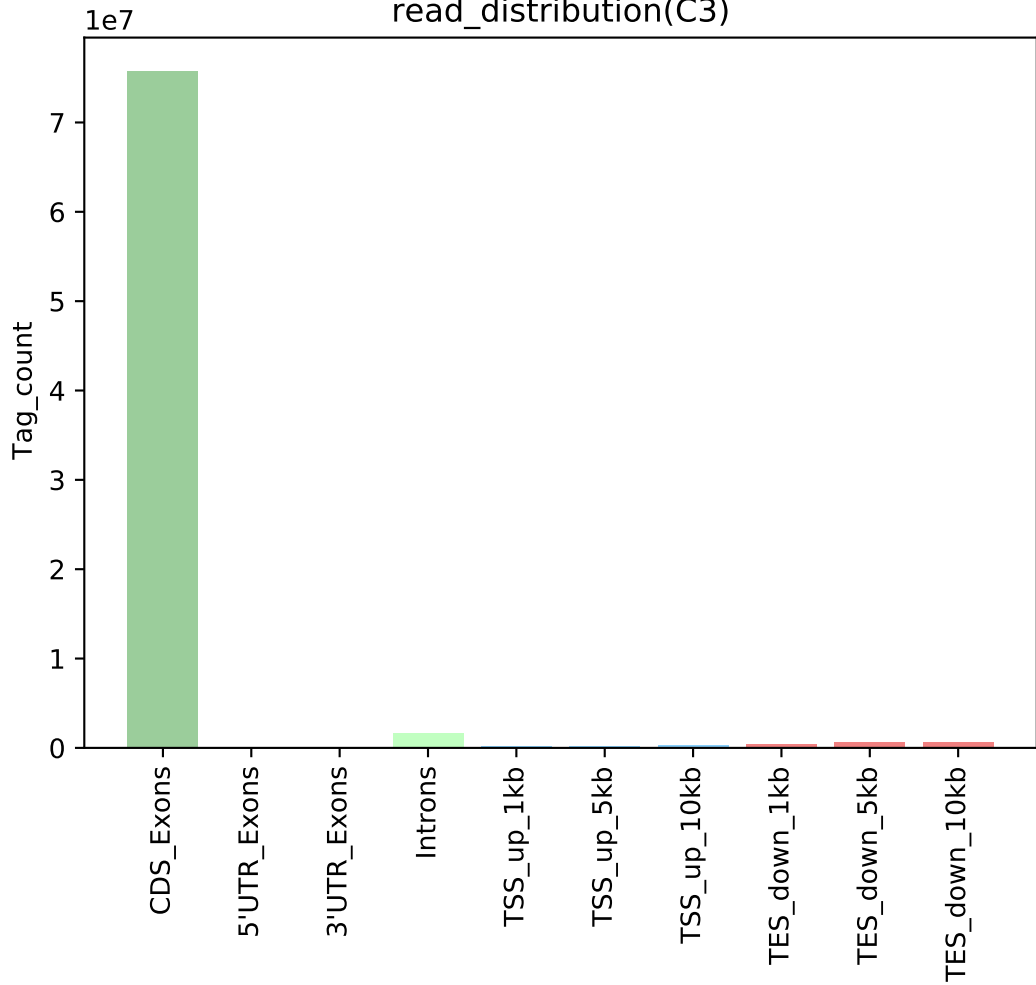

Supplement: Supplementary file 274 [file C3.read_distribution.pdf › Source data/1.RNA-Seq source data/1.BMSCs/result/2.quality_control/2.2.rnaseq_qc/C3.read_distribution.pdf]

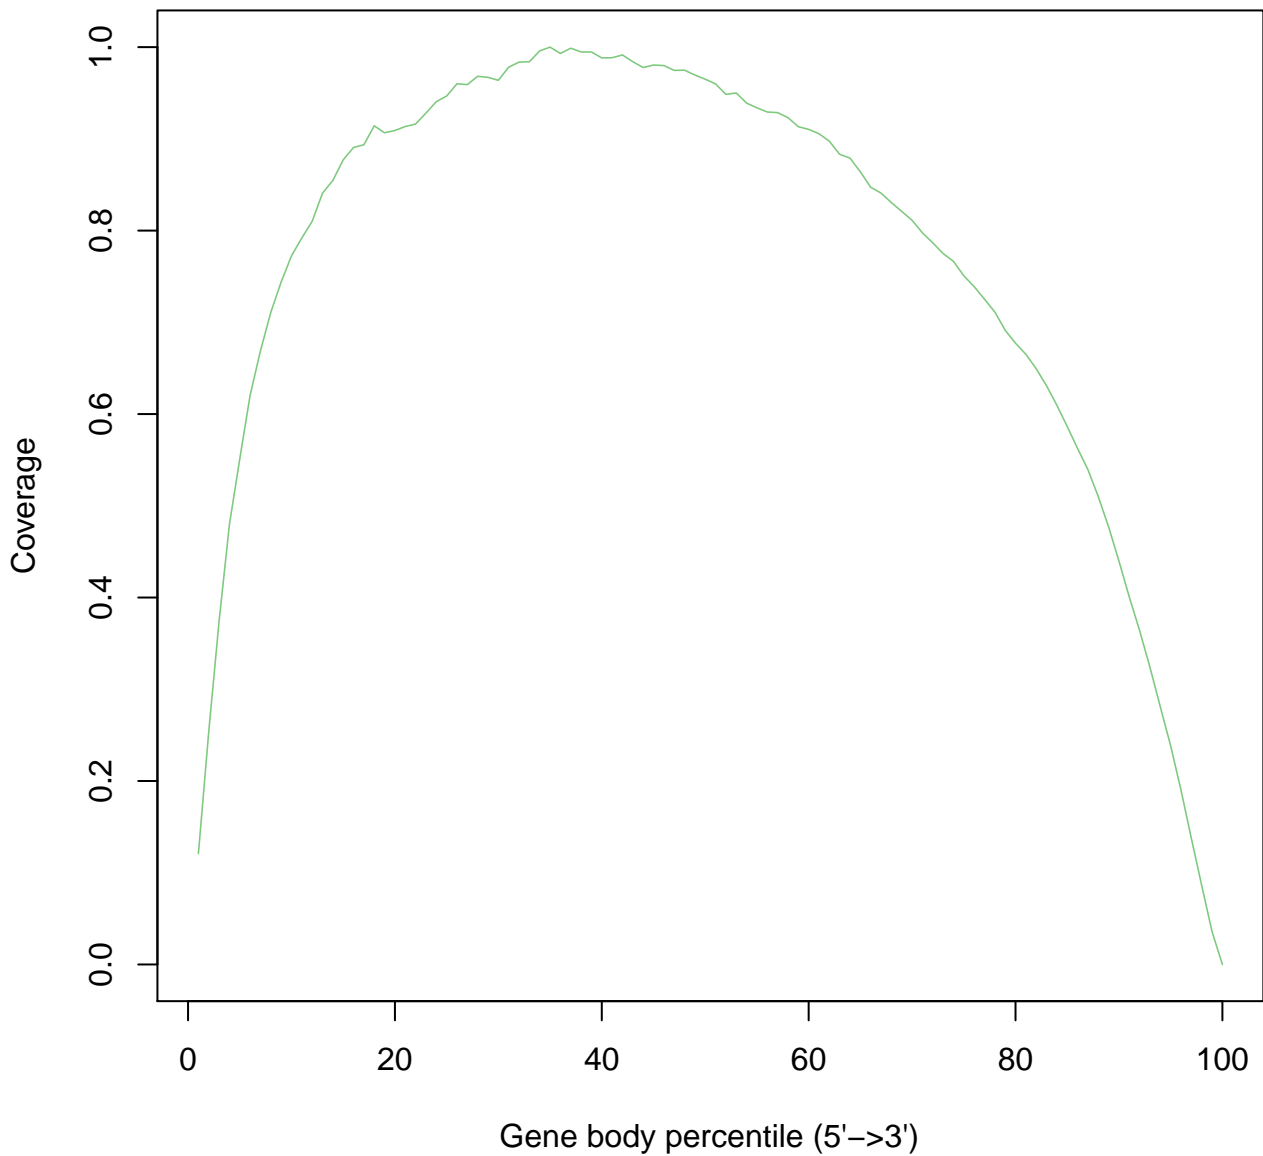

Supplement: Supplementary file 275 [file S1.coverage.geneBodyCoverage.curves.pdf › Source data/1.RNA-Seq source data/1.BMSCs/result/2.quality_control/2.2.rnaseq_qc/S1.coverage.geneBodyCoverage.curves.pdf]

read\_distribution(S1)

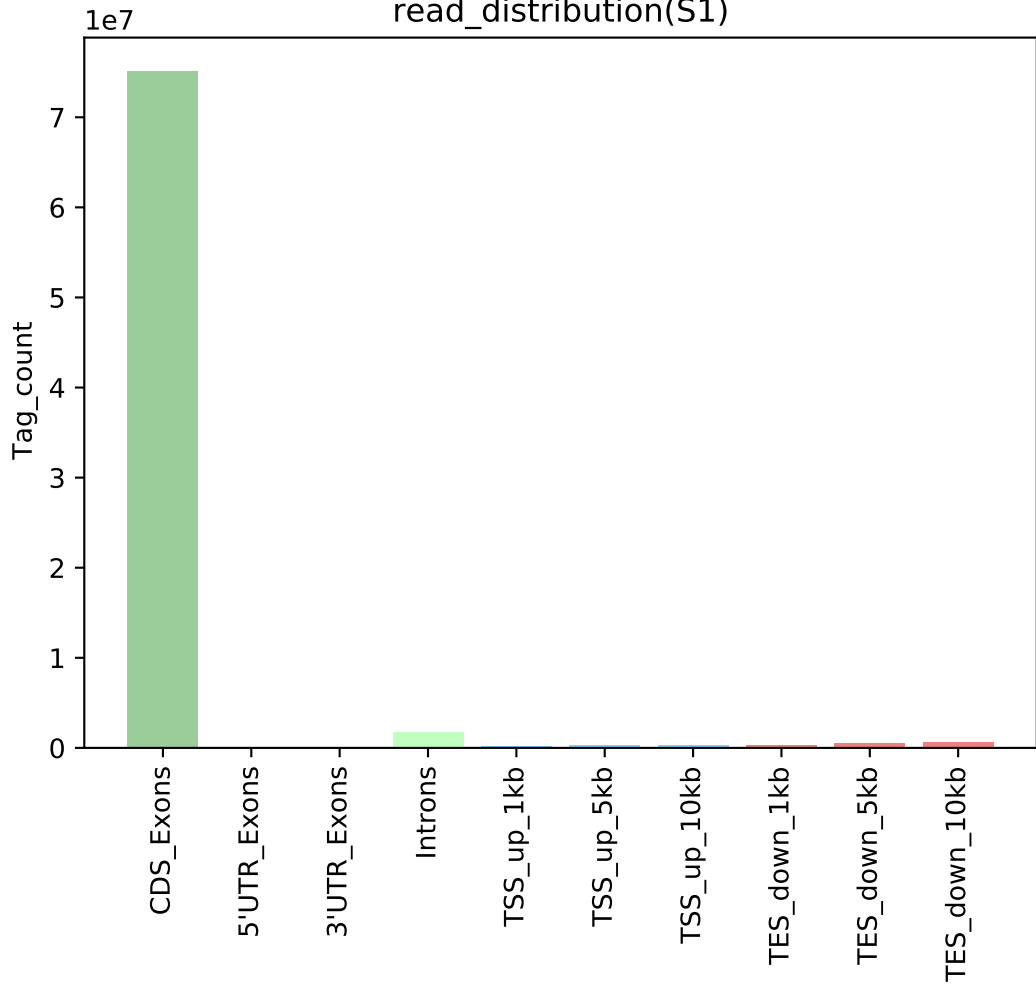

Supplement: Supplementary file 276 [file S1.read_distribution.pdf › Source data/1.RNA-Seq source data/1.BMSCs/result/2.quality_control/2.2.rnaseq_qc/S1.read_distribution.pdf]

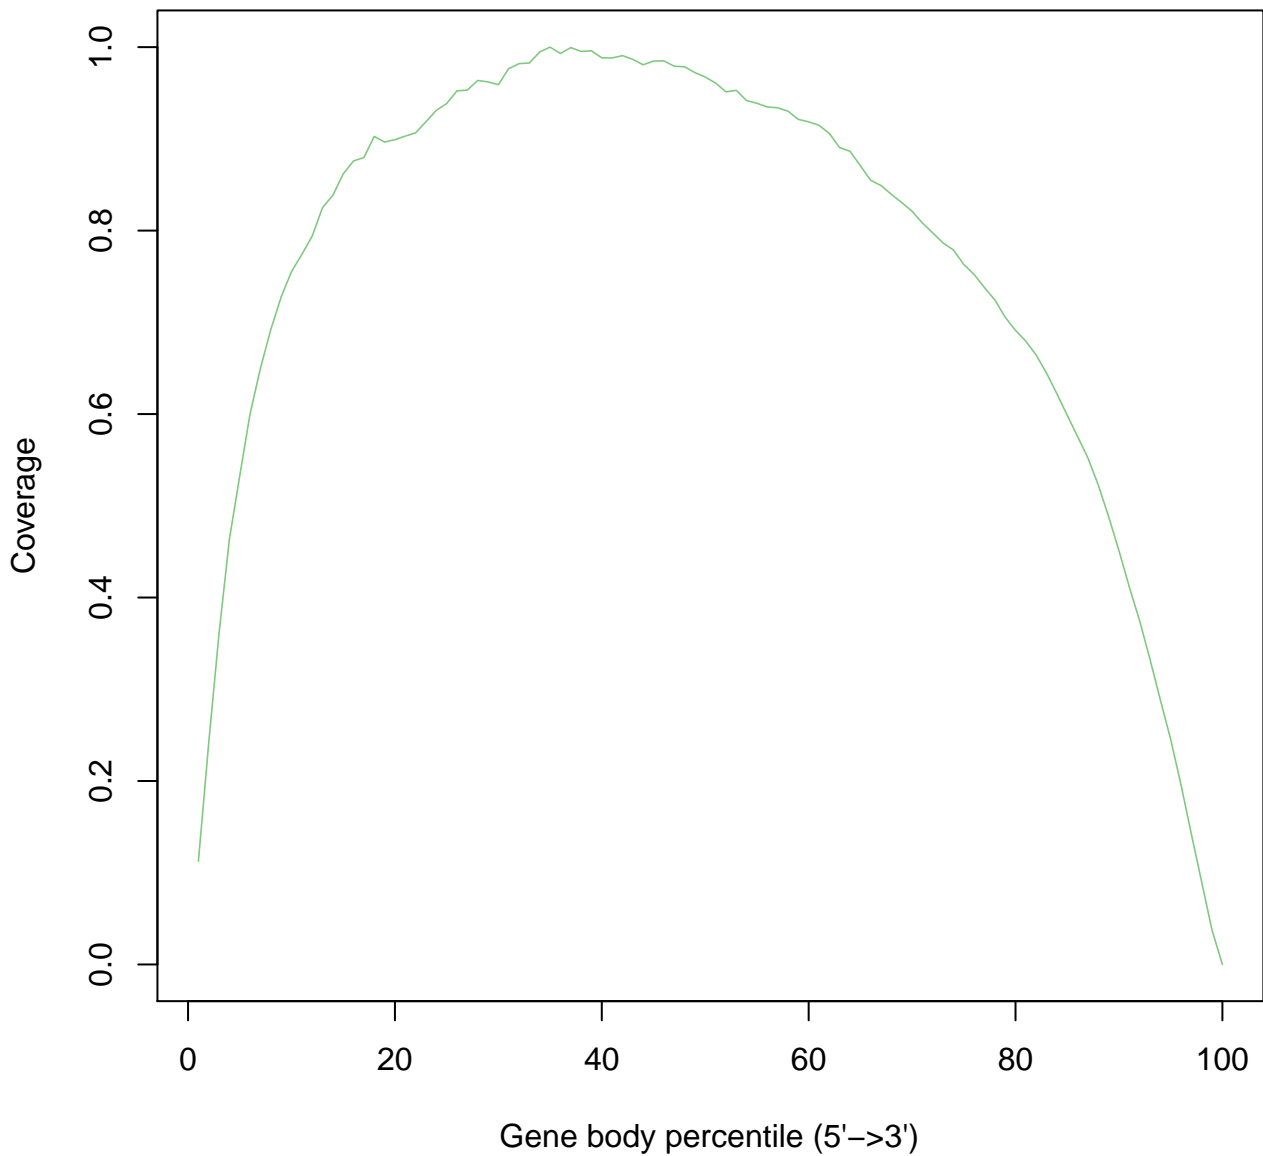

Supplement: Supplementary file 277 [file S2.coverage.geneBodyCoverage.curves.pdf › Source data/1.RNA-Seq source data/1.BMSCs/result/2.quality_control/2.2.rnaseq_qc/S2.coverage.geneBodyCoverage.curves.pdf]

read\_distribution(S2)

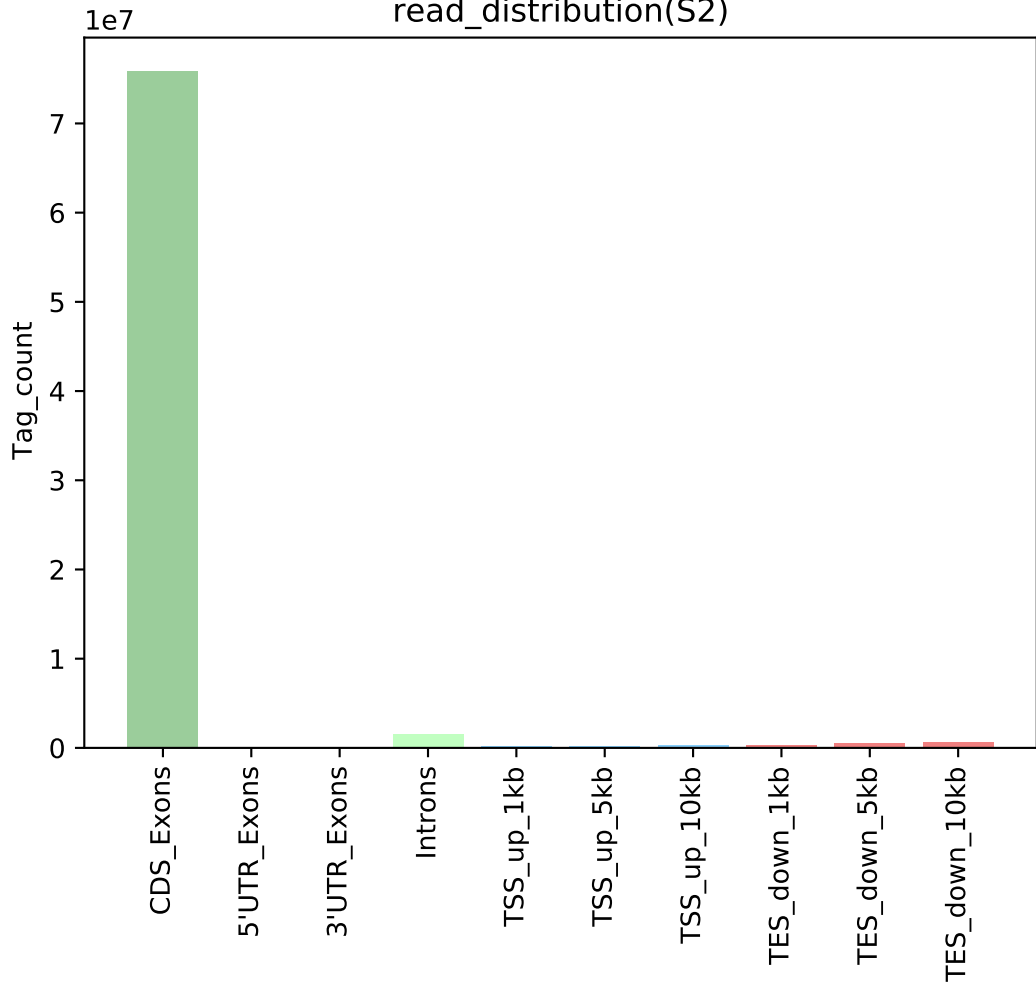

Supplement: Supplementary file 278 [file S2.read_distribution.pdf › Source data/1.RNA-Seq source data/1.BMSCs/result/2.quality_control/2.2.rnaseq_qc/S2.read_distribution.pdf]

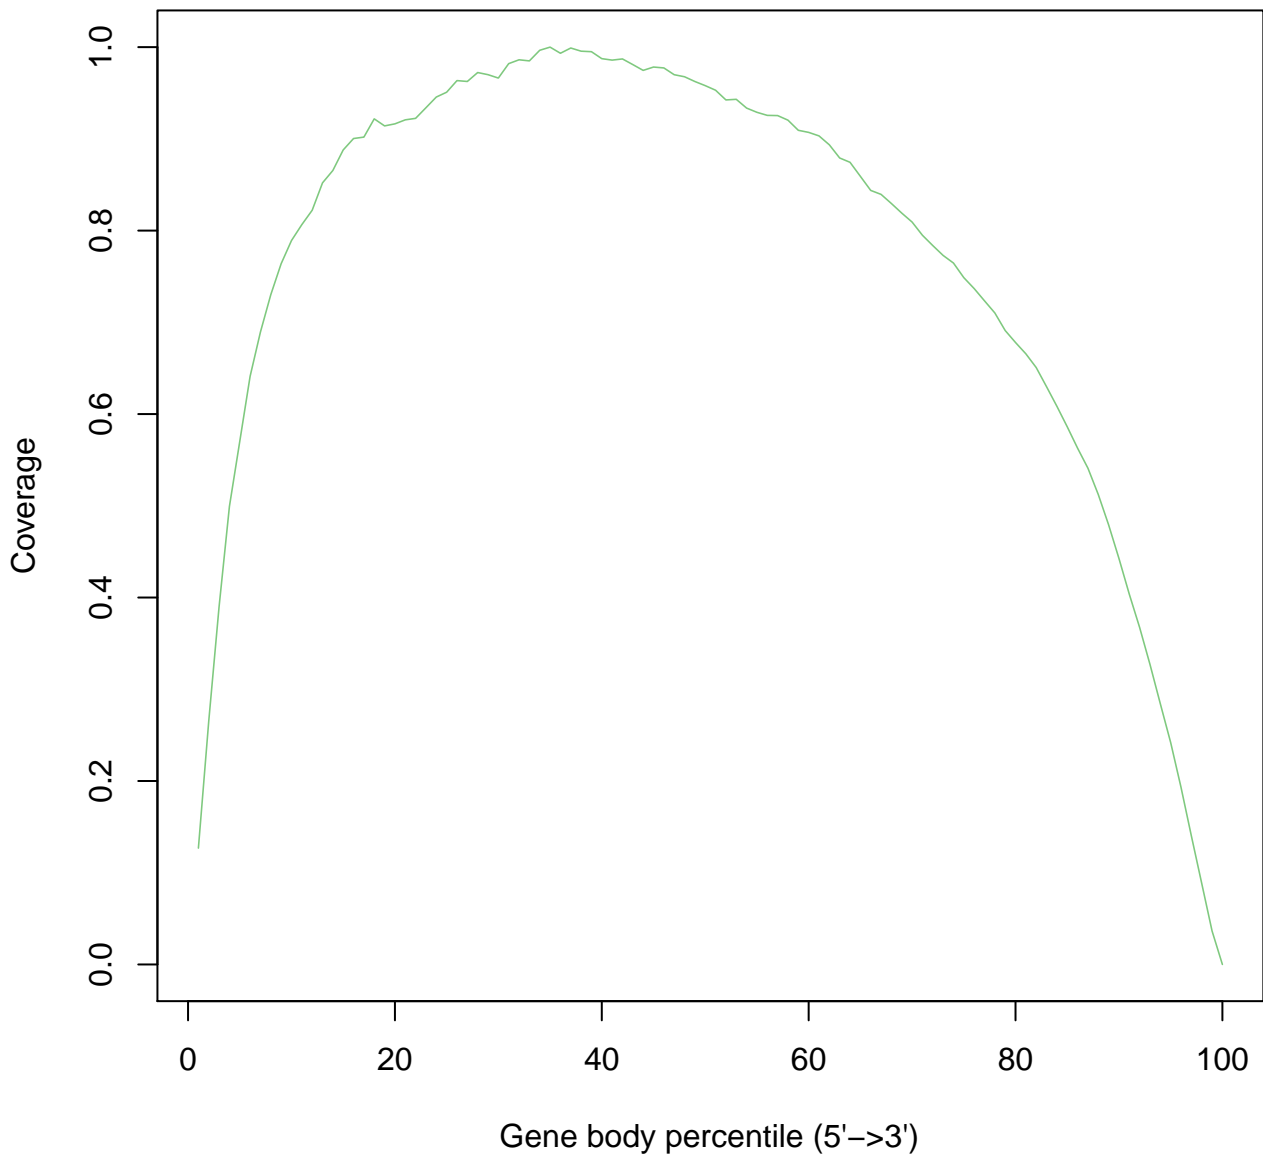

Supplement: Supplementary file 279 [file S3.coverage.geneBodyCoverage.curves.pdf › Source data/1.RNA-Seq source data/1.BMSCs/result/2.quality_control/2.2.rnaseq_qc/S3.coverage.geneBodyCoverage.curves.pdf]

read\_distribution(S3)

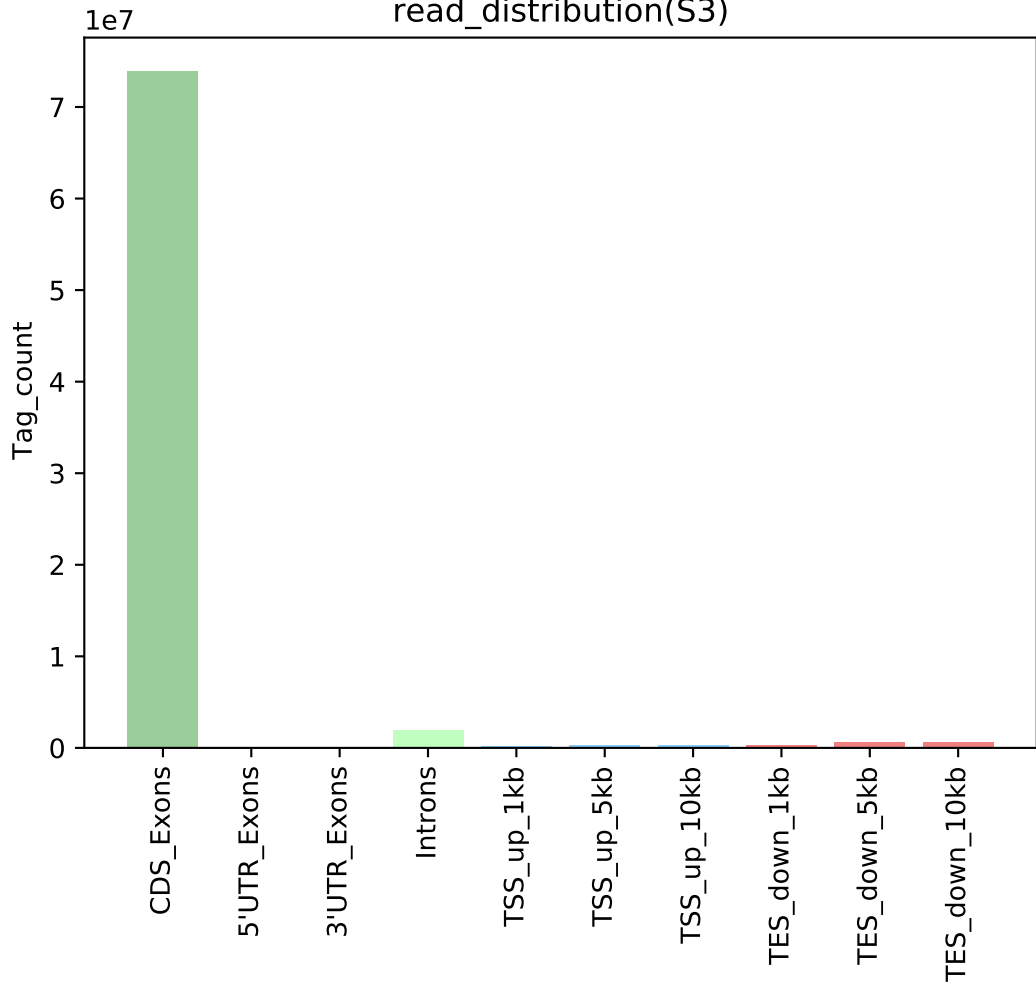

Supplement: Supplementary file 280 [file S3.read_distribution.pdf › Source data/1.RNA-Seq source data/1.BMSCs/result/2.quality_control/2.2.rnaseq_qc/S3.read_distribution.pdf]

Boxplot for FPKM Values

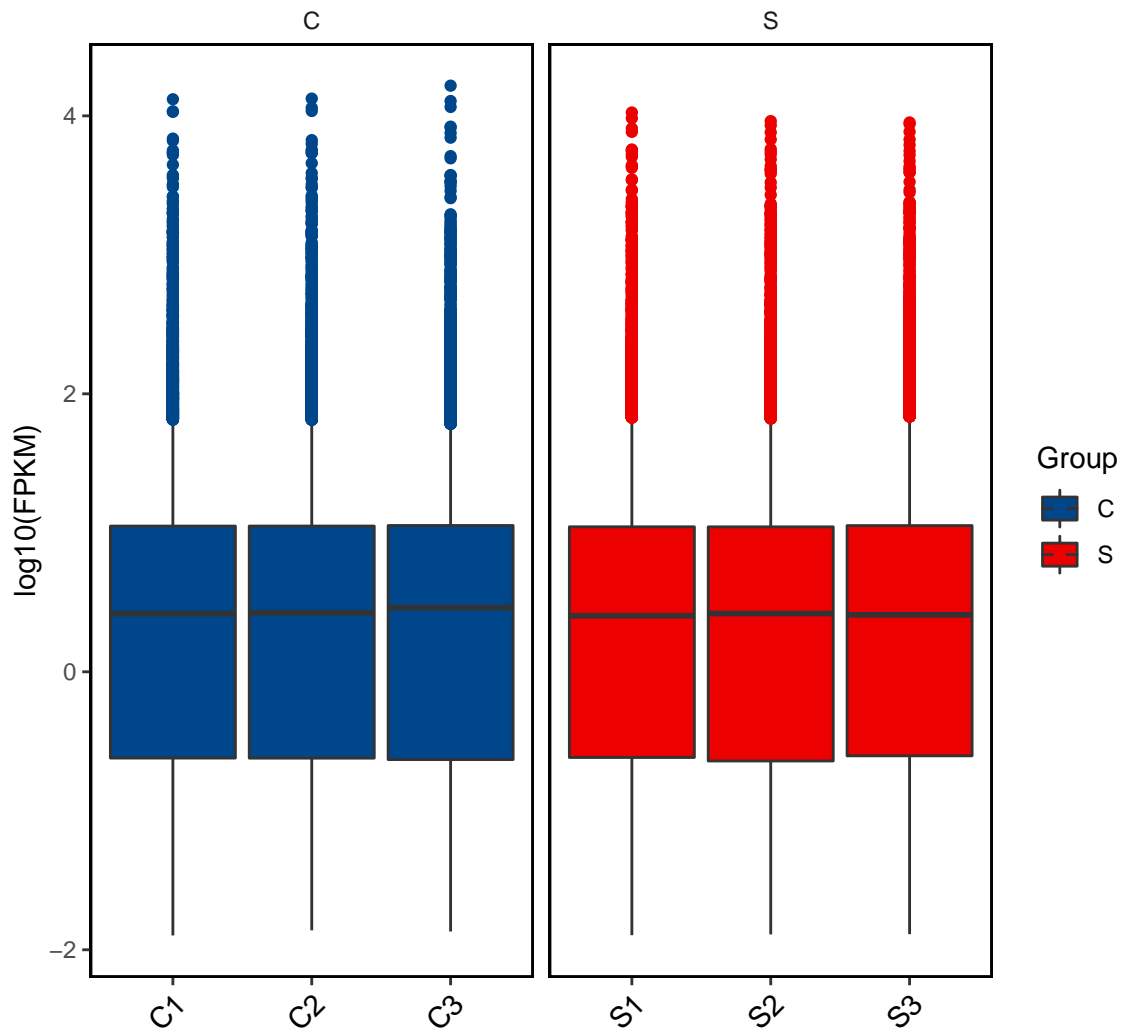

Supplement: Supplementary file 281 [file FPKM_boxplot.pdf › Source data/1.RNA-Seq source data/2.HUVECs/result/1.3.gene_expression/FPKM_boxplot.pdf]

# Gene expression in each sample

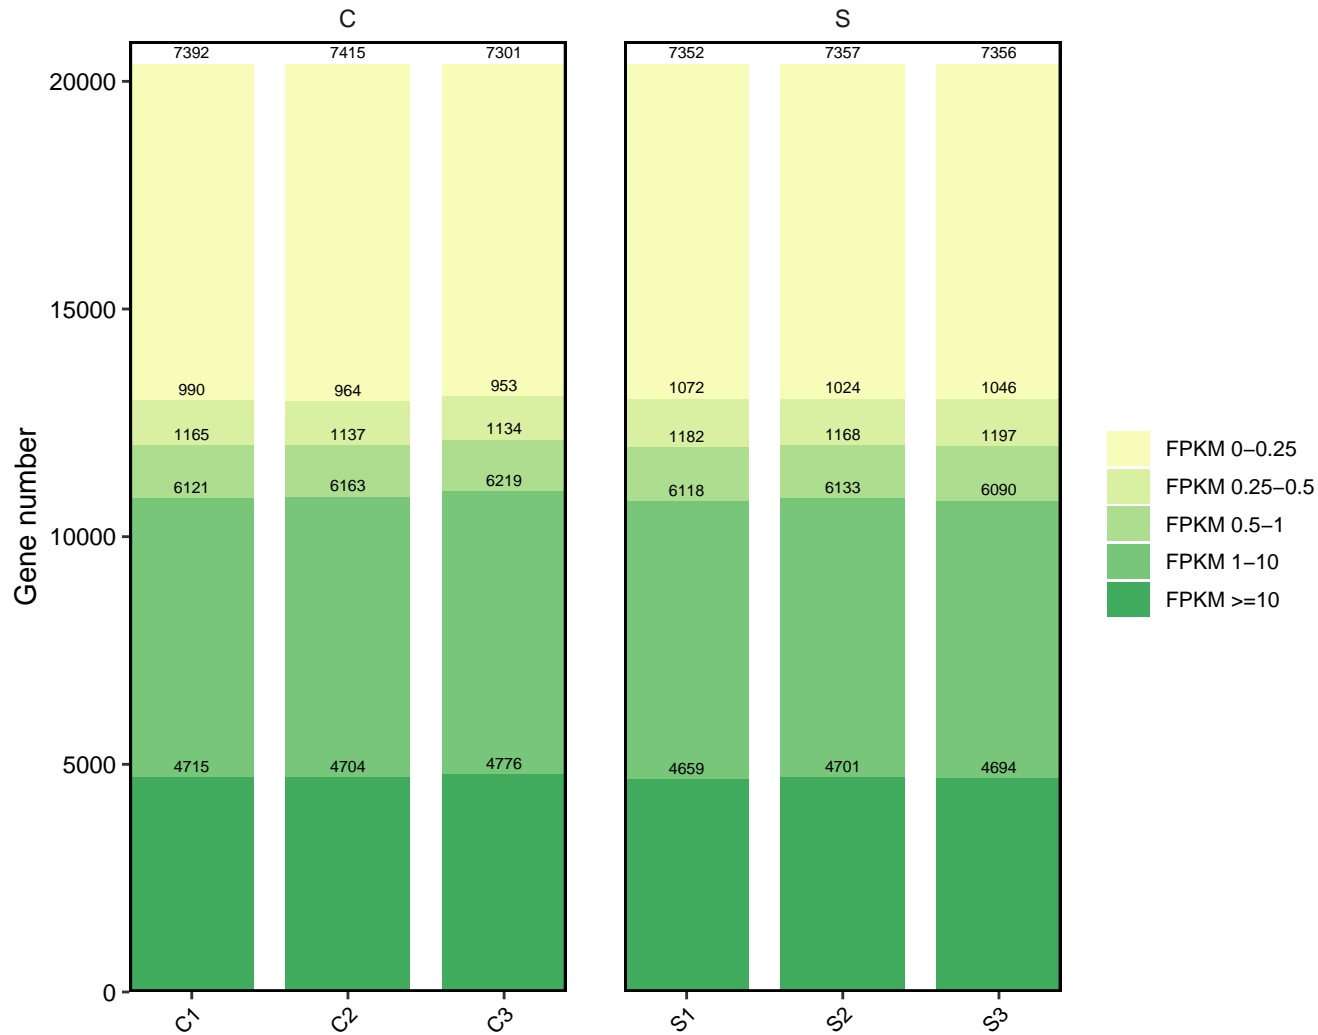

Supplement: Supplementary file 282 [file FPKM_region.pdf › Source data/1.RNA-Seq source data/2.HUVECs/result/1.3.gene_expression/FPKM_region.pdf]

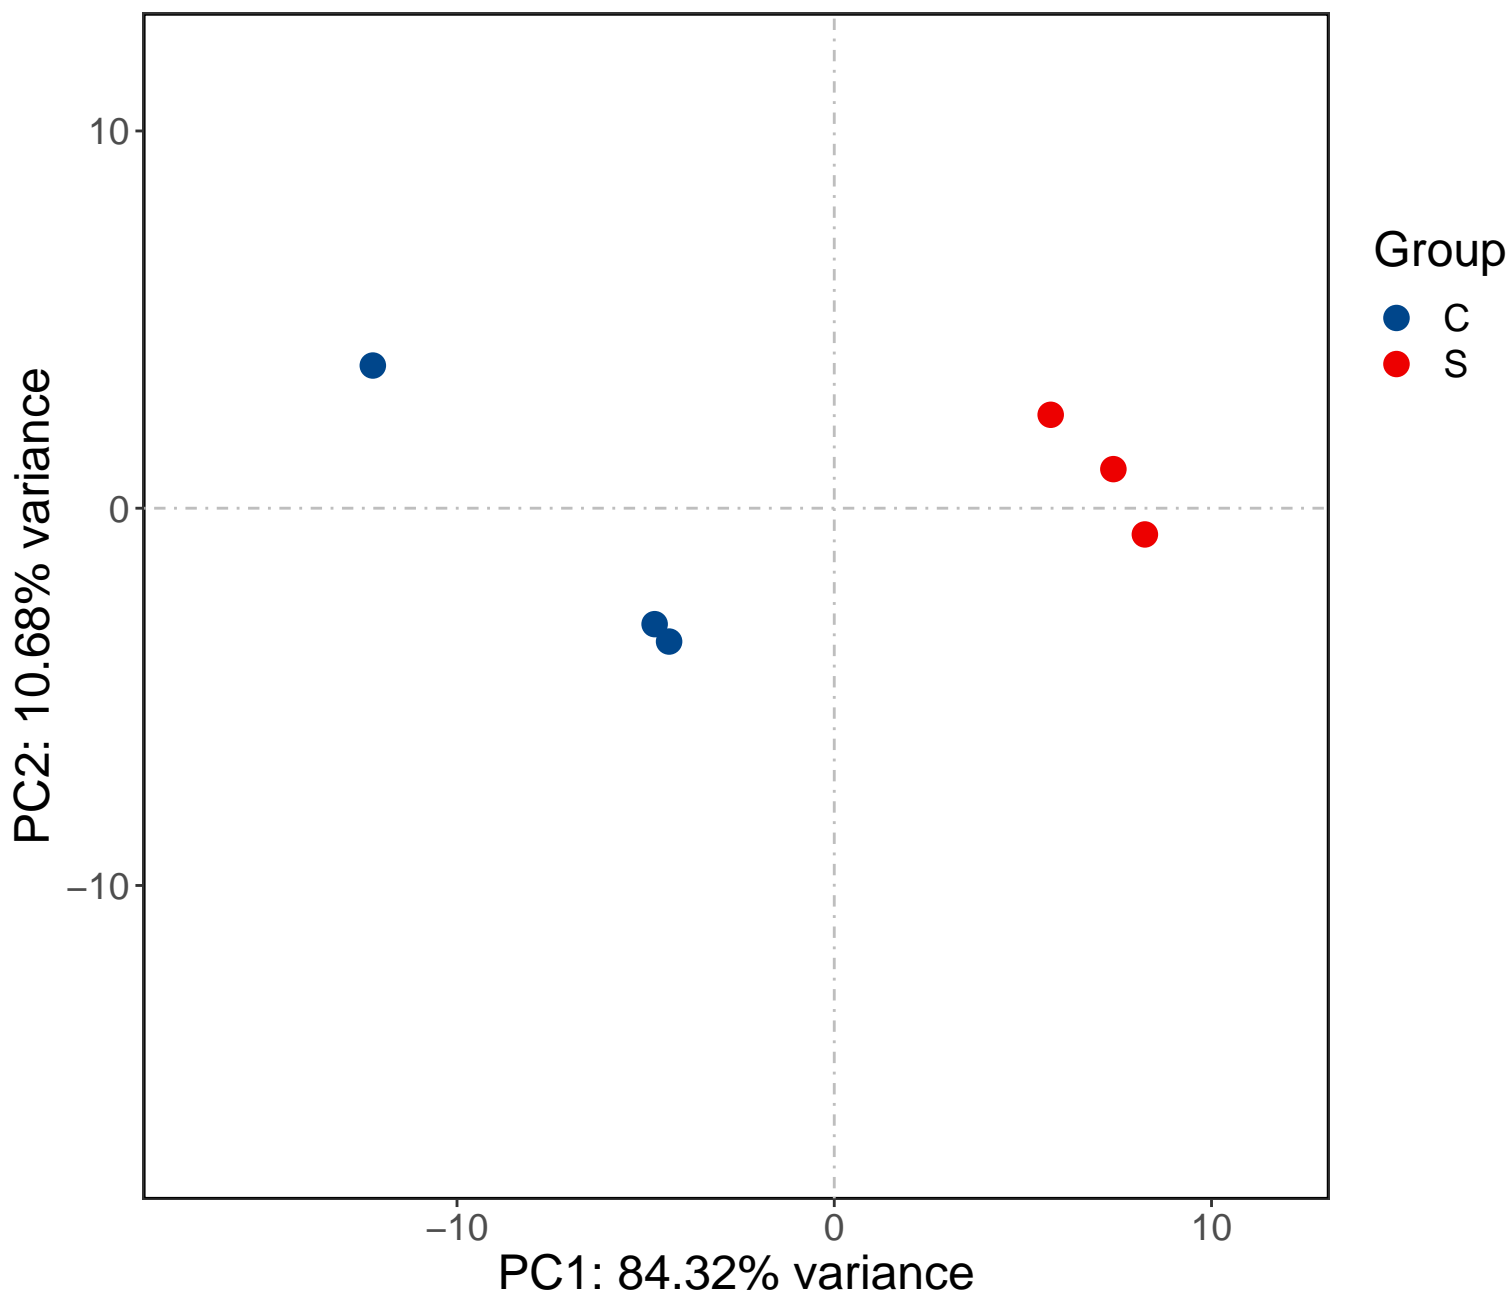

Supplement: Supplementary file 283 [file PCA_1.pdf › Source data/1.RNA-Seq source data/2.HUVECs/result/1.3.gene_expression/PCA_1.pdf]

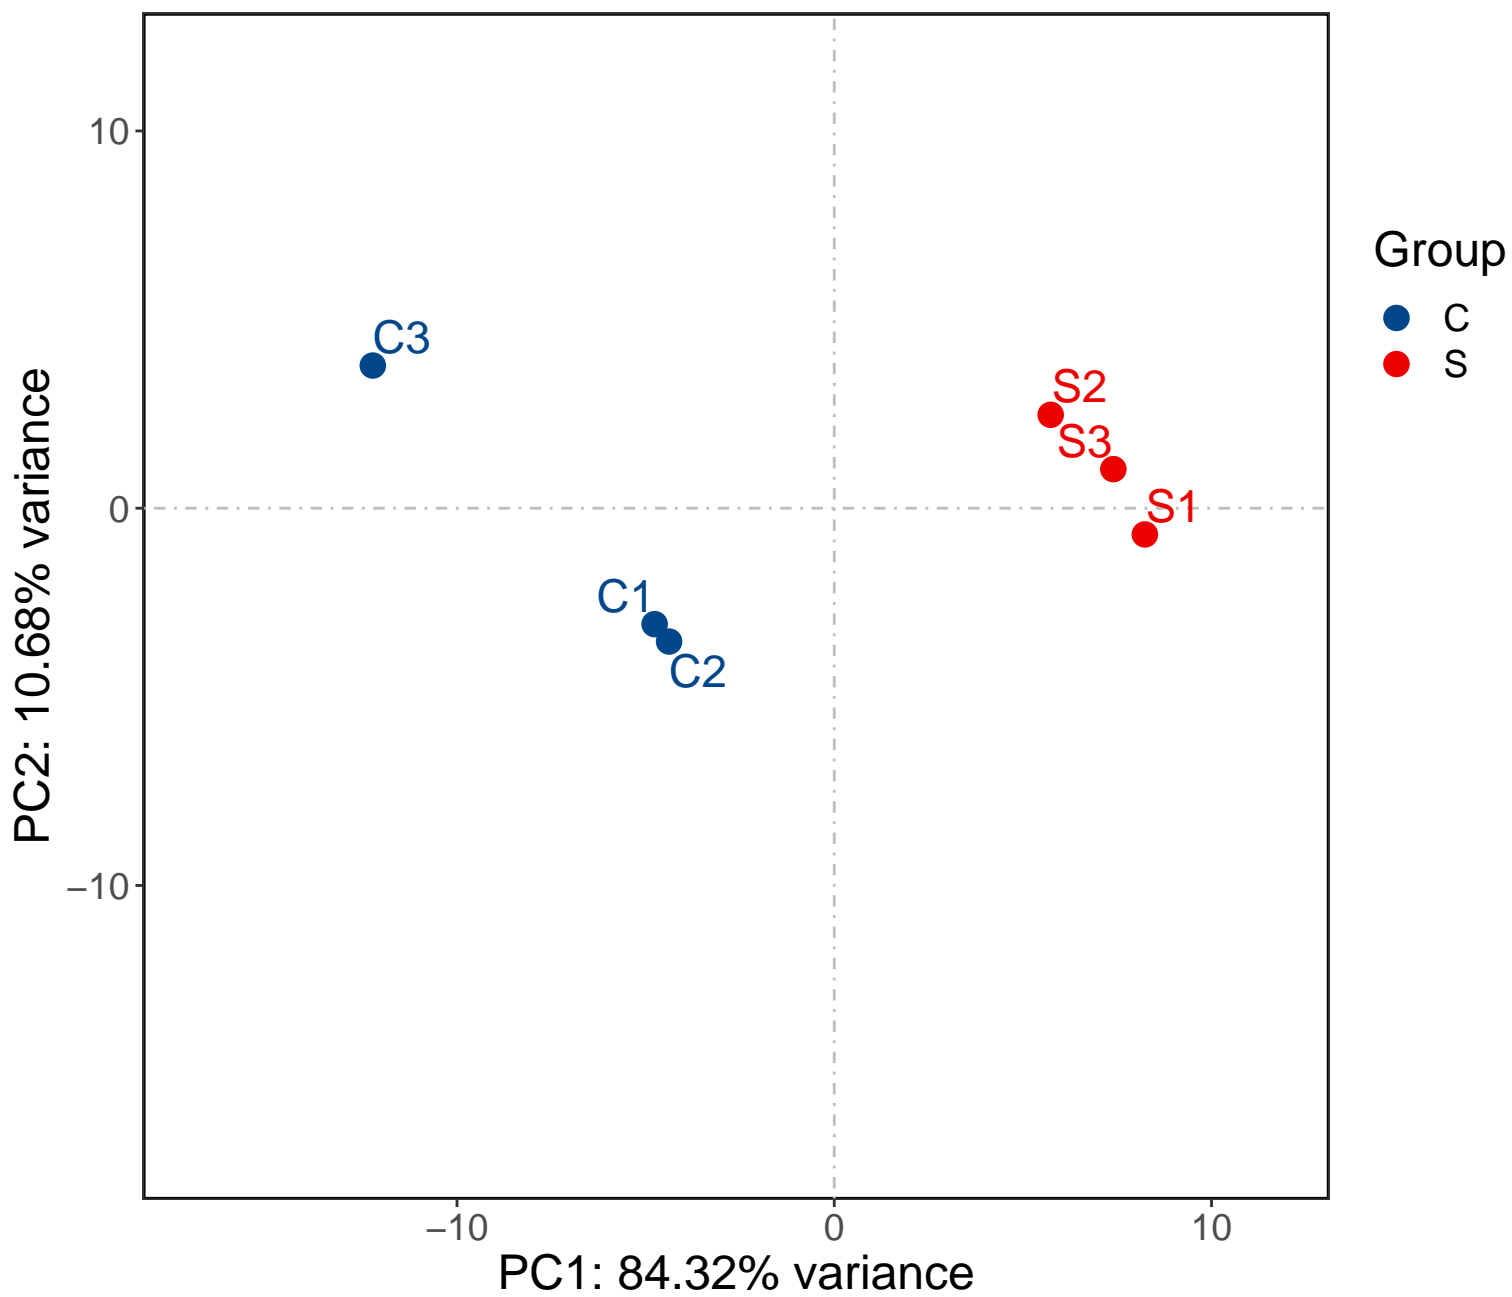

Supplement: Supplementary file 284 [file PCA_2.pdf › Source data/1.RNA-Seq source data/2.HUVECs/result/1.3.gene_expression/PCA_2.pdf]

PCA 3D figure

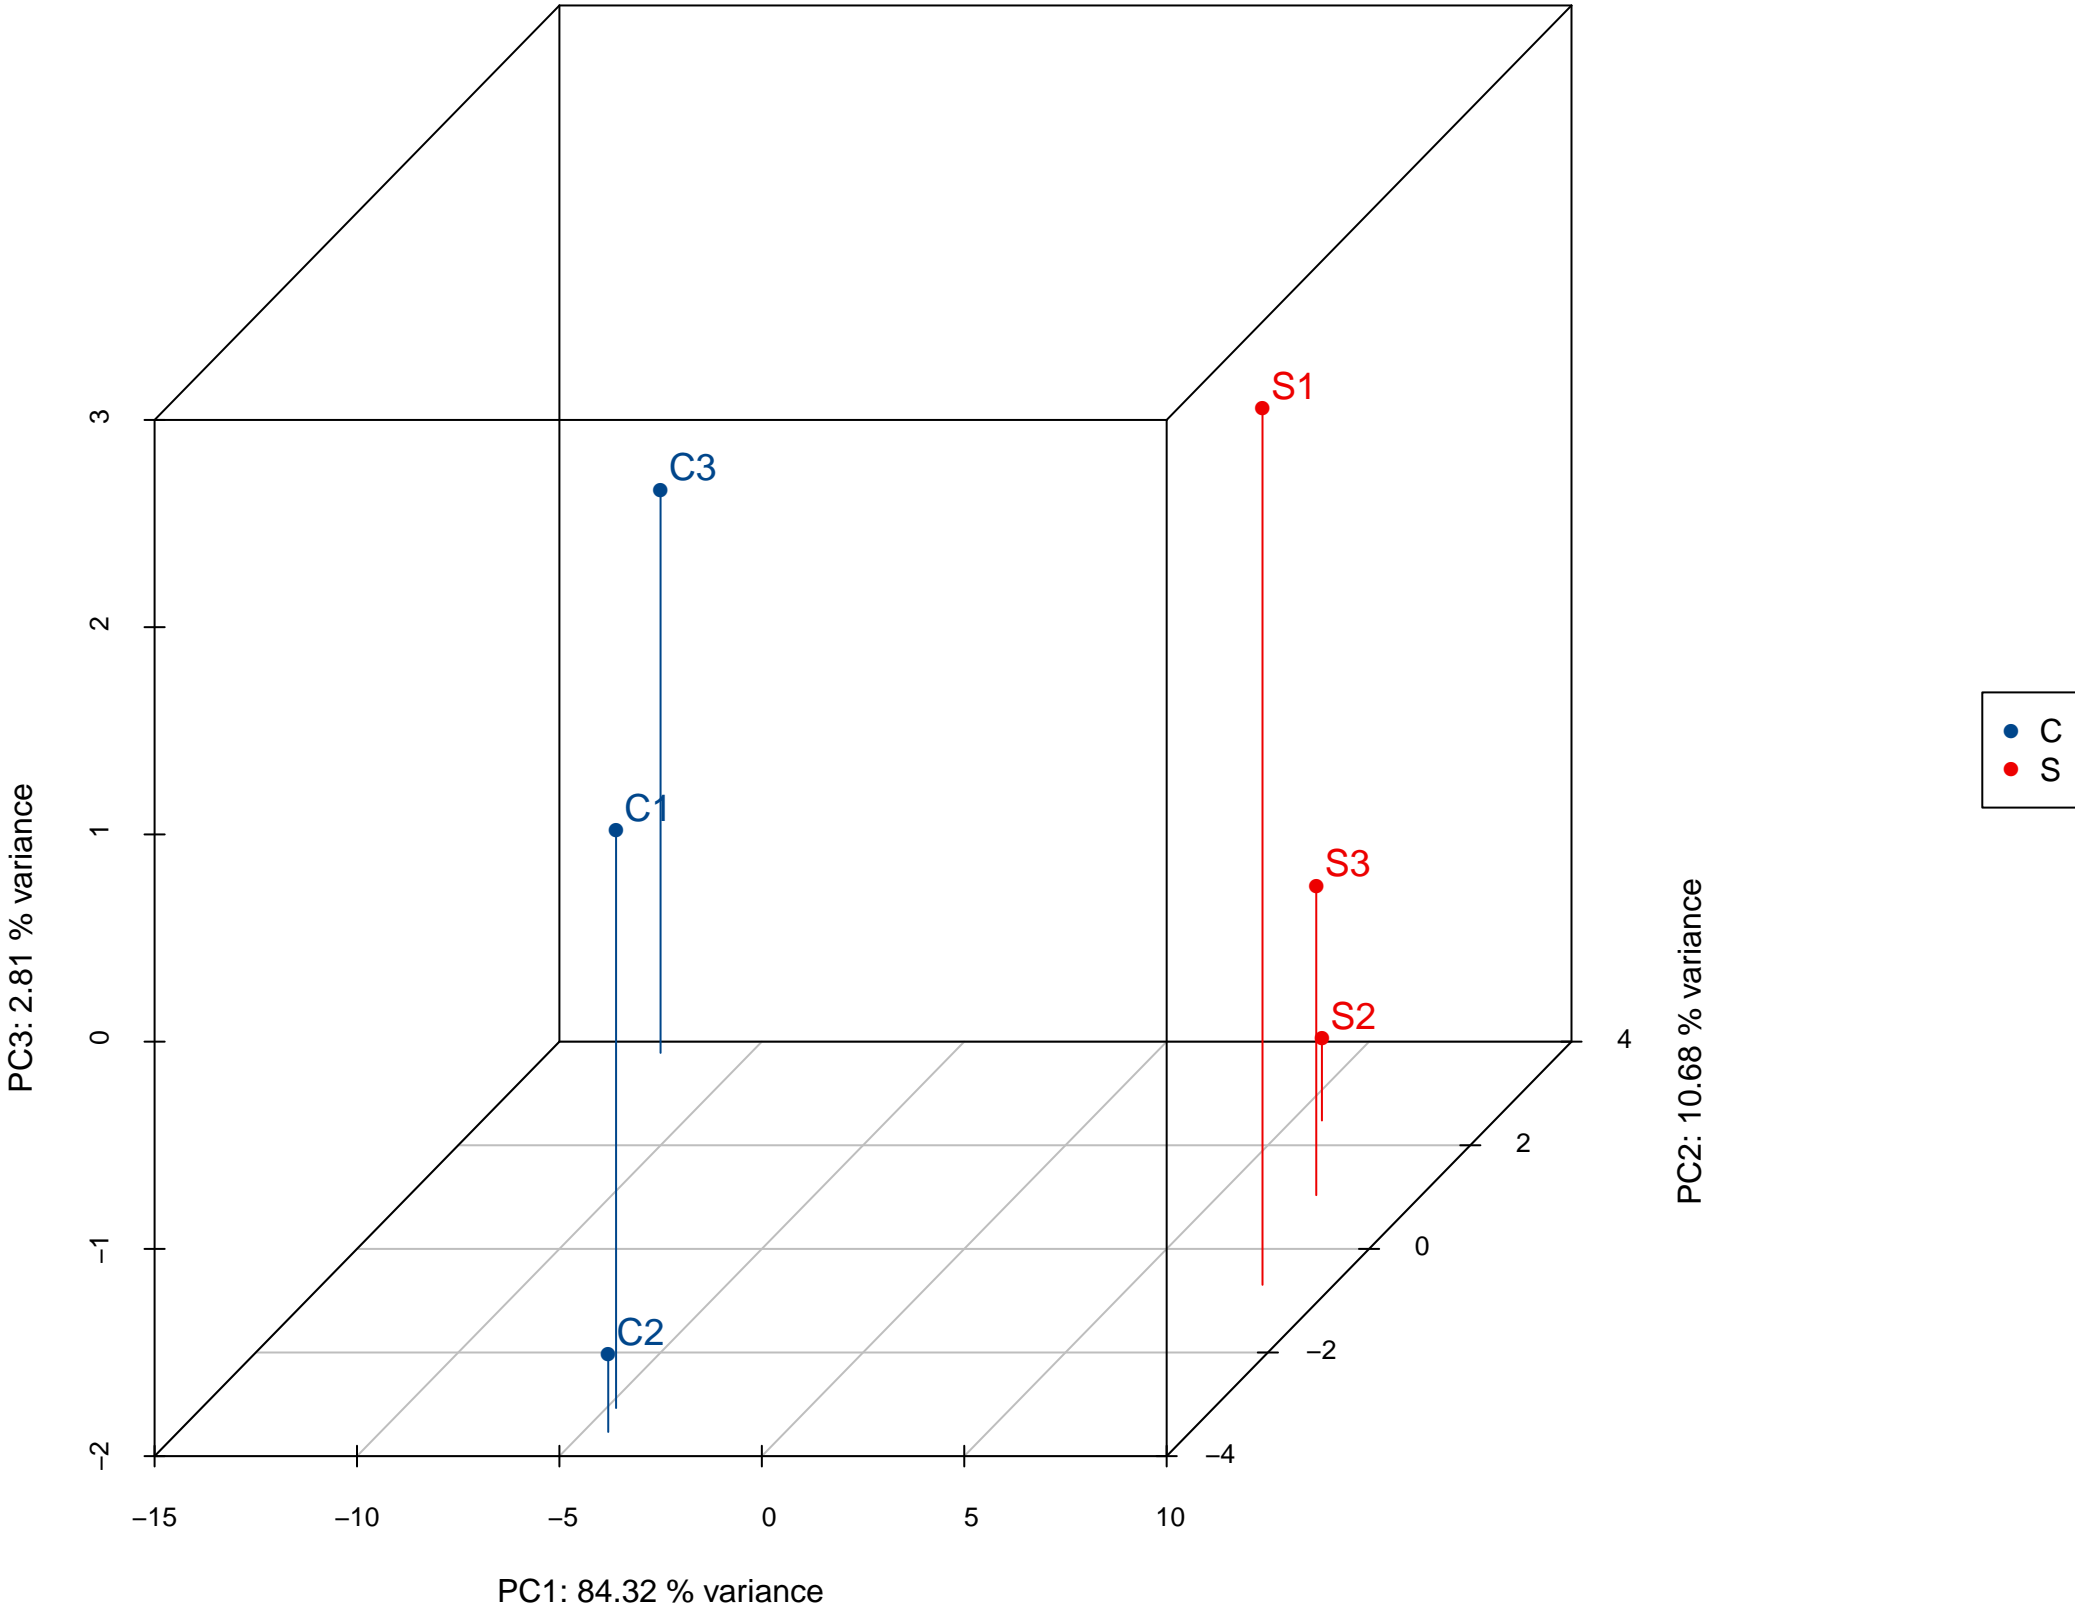

Supplement: Supplementary file 285 [file PCA_3D.pdf › Source data/1.RNA-Seq source data/2.HUVECs/result/1.3.gene_expression/PCA_3D.pdf]

Sample-to-Sample distances

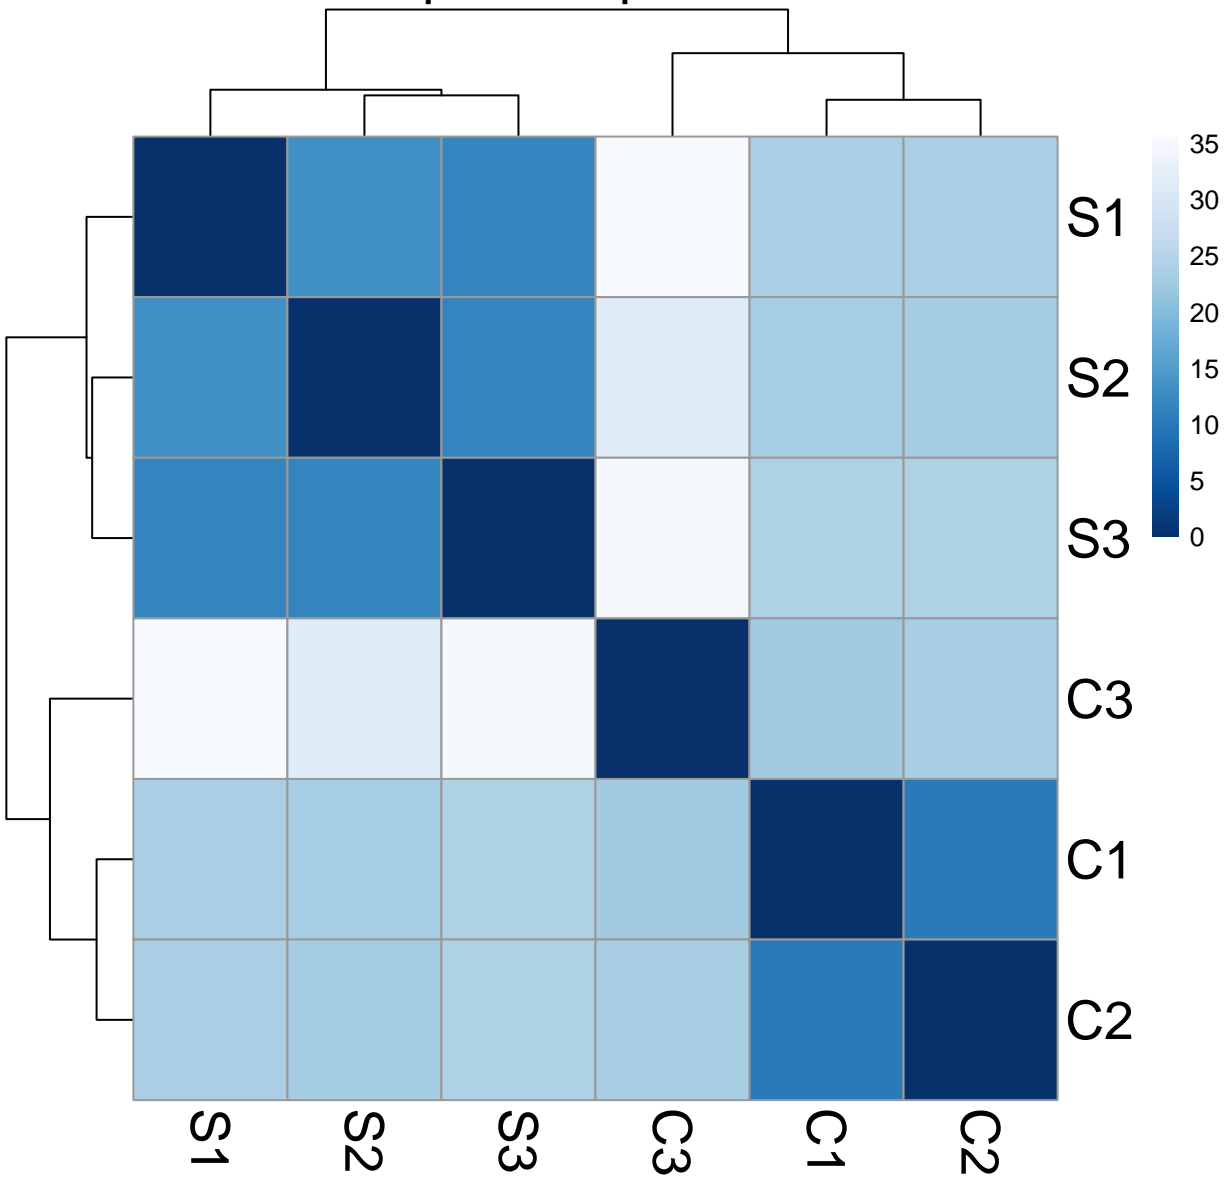

Supplement: Supplementary file 286 [file Sample-to-Sample_distances_heatmap.pdf › Source data/1.RNA-Seq source data/2.HUVECs/result/1.3.gene_expression/Sample-to-Sample_distances_heatmap.pdf]

Gene expression in each sample

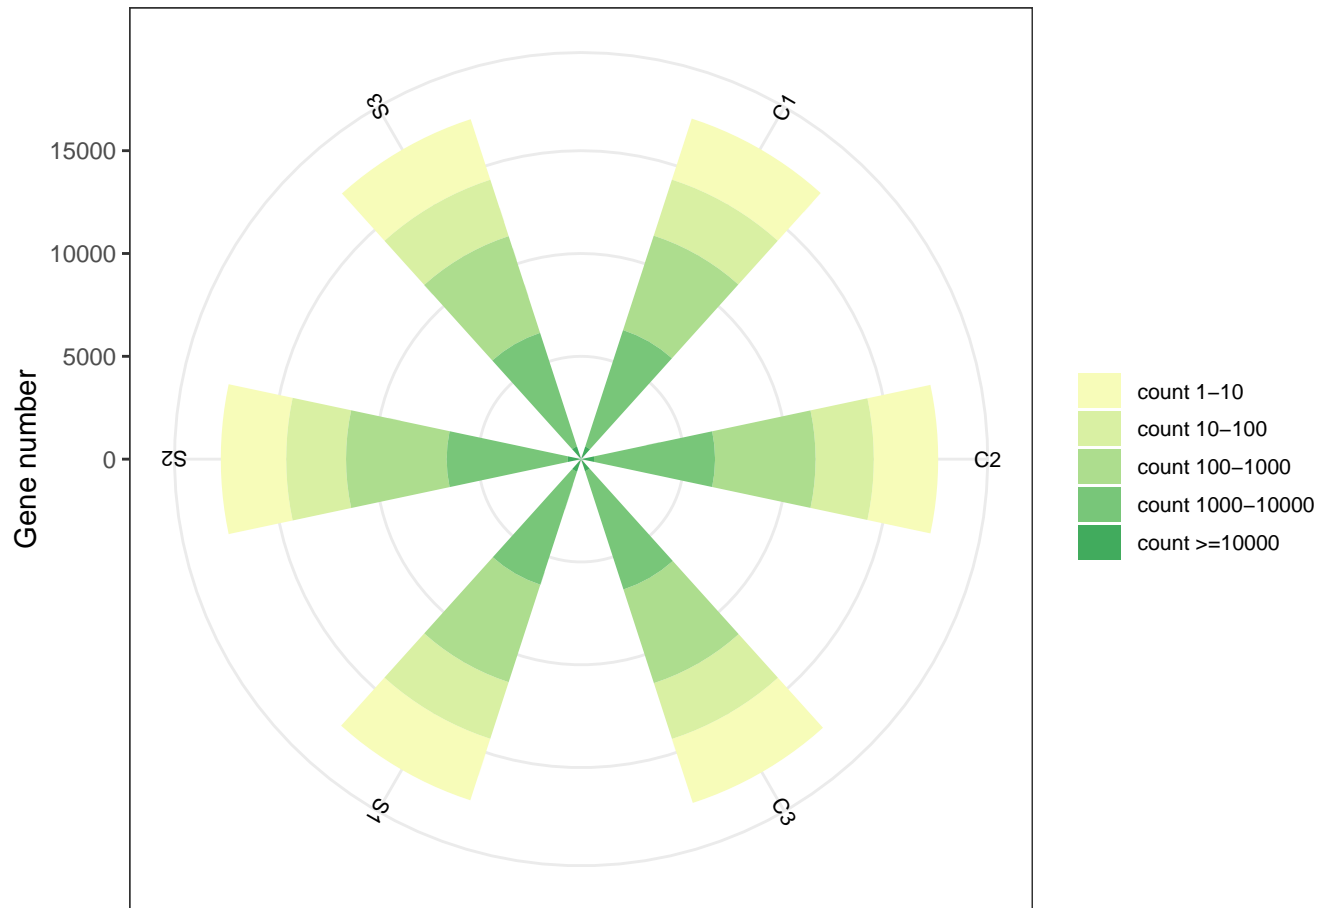

Supplement: Supplementary file 287 [file count_region.pdf › Source data/1.RNA-Seq source data/2.HUVECs/result/1.3.gene_expression/count_region.pdf]

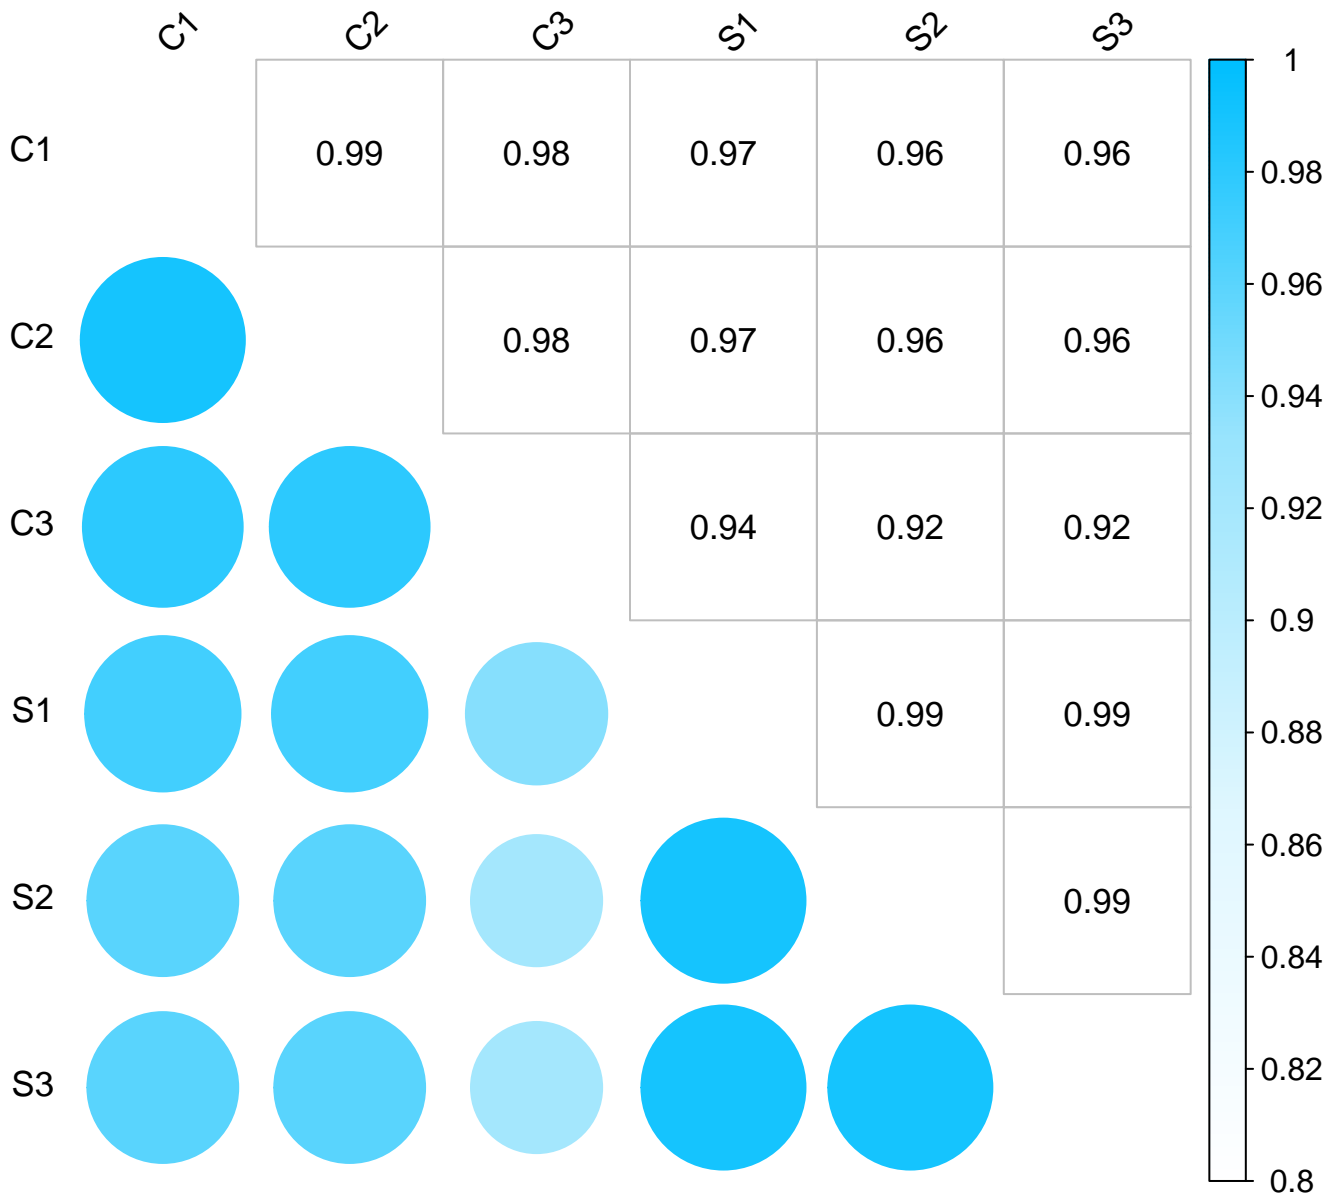

Supplement: Supplementary file 288 [file heatmap-coefficient_matrix.pdf › Source data/1.RNA-Seq source data/2.HUVECs/result/1.3.gene_expression/heatmap-coefficient_matrix.pdf]

# S-vs-C: q-value<0.05 && |log<sub>2</sub> FC|>1

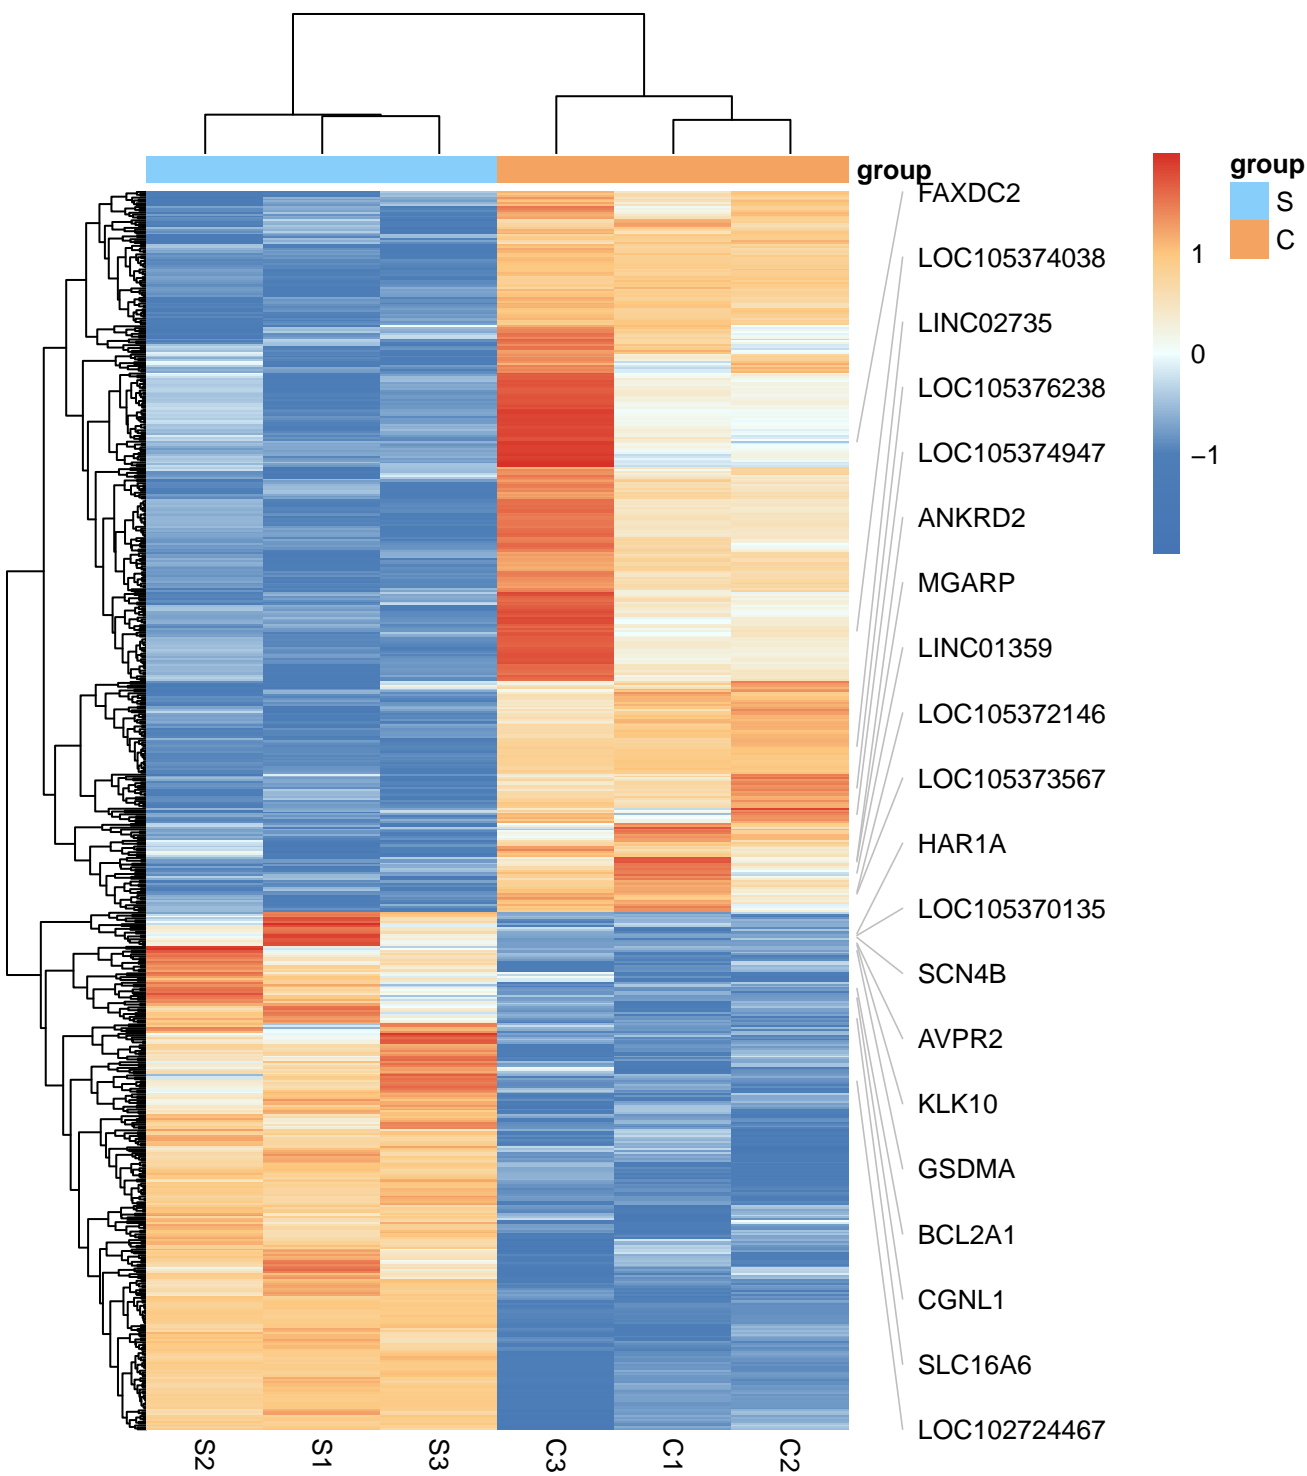

Supplement: Supplementary file 289 [file S-vs-C-heatmap-q-val-0.05-FC-2.gene.pdf › Source data/1.RNA-Seq source data/2.HUVECs/result/1.4.different_expressed_gene/S-vs-C/S-vs-C-heatmap-q-val-0.05-FC-2.gene.pdf]

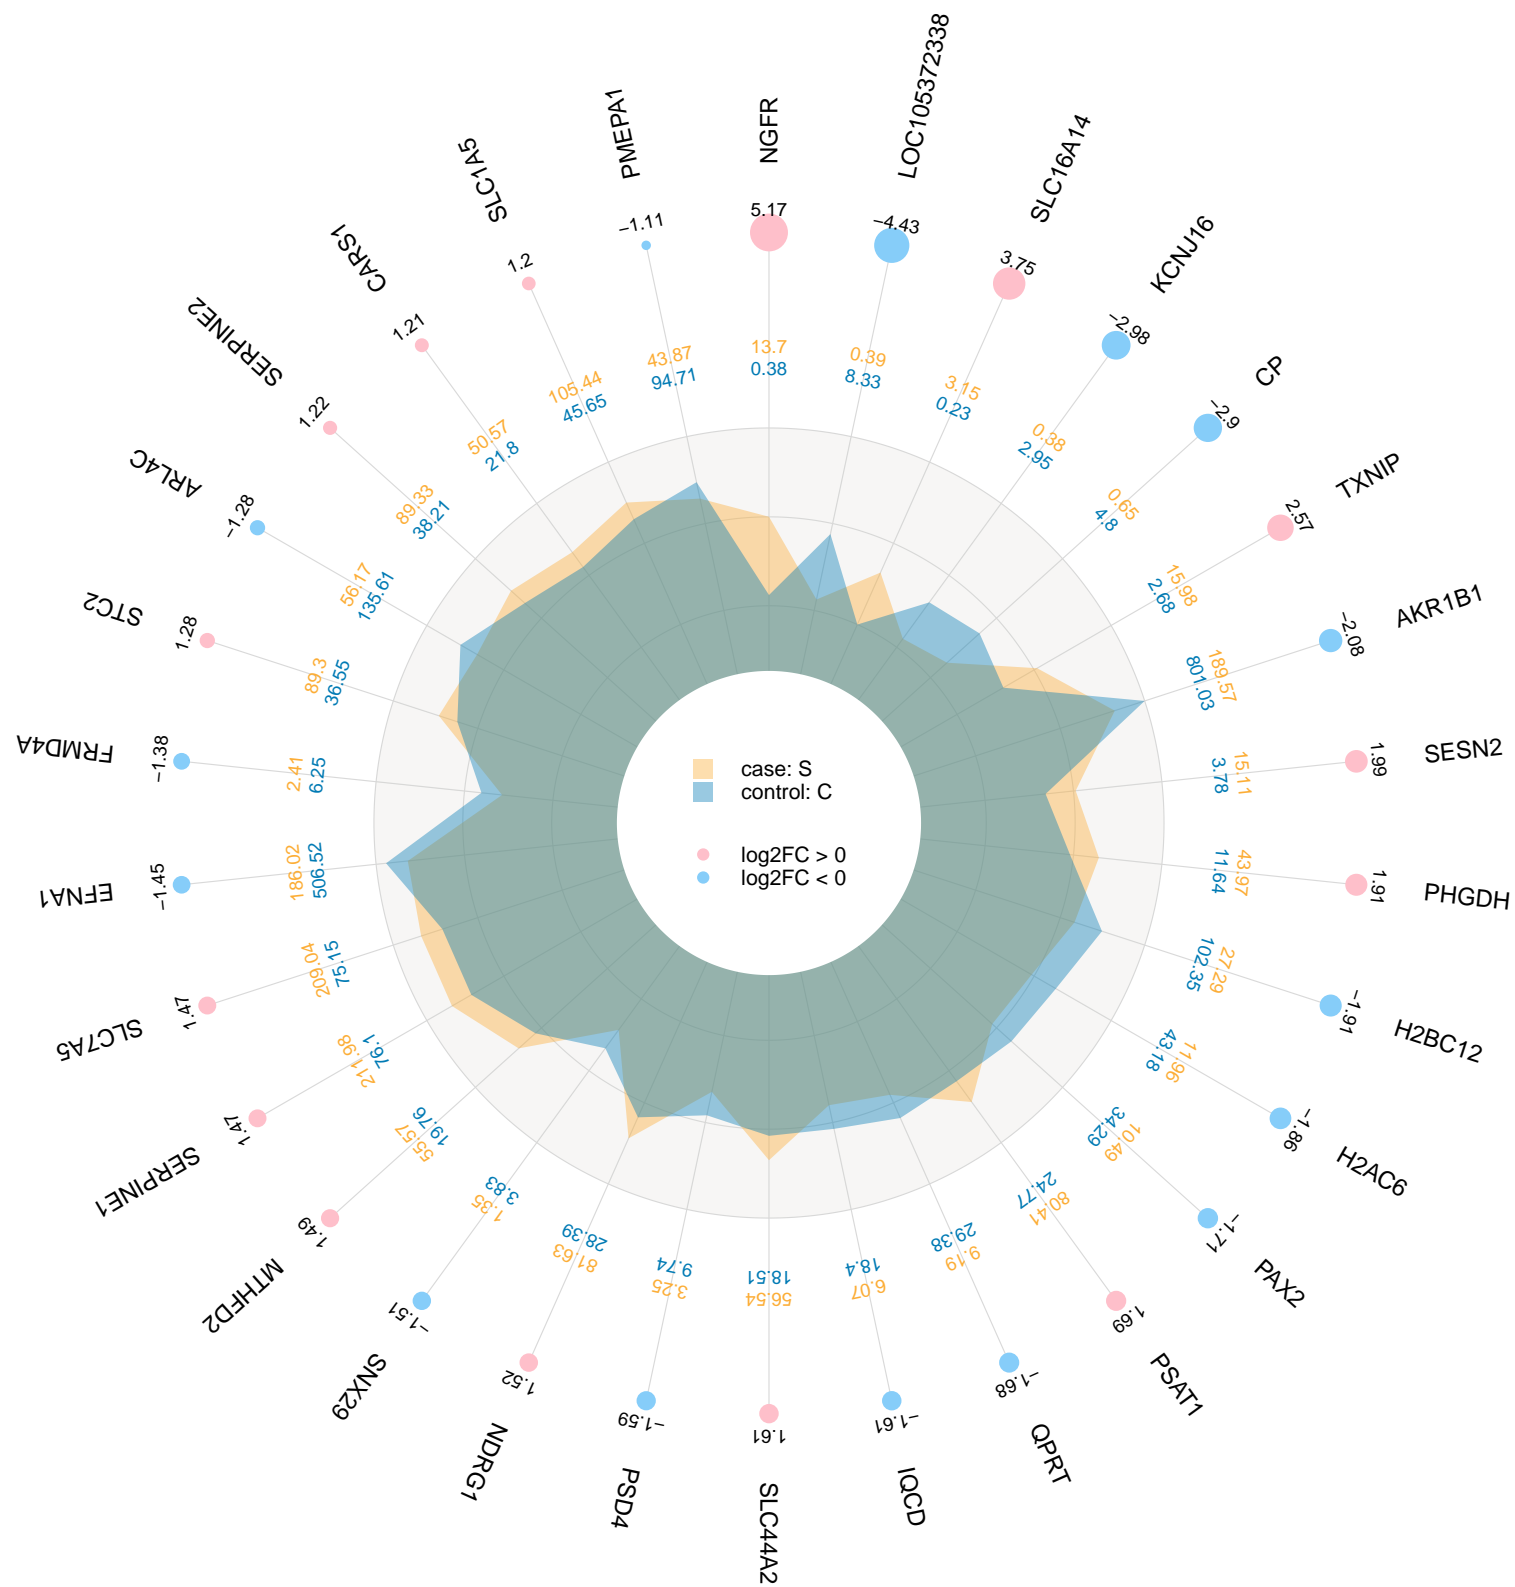

Supplement: Supplementary file 290 [file S-vs-C-radar.pdf › Source data/1.RNA-Seq source data/2.HUVECs/result/1.4.different_expressed_gene/S-vs-C/S-vs-C-radar.pdf]

# S-vs-C: q-value<0.05 && |log<sub>2</sub> FC|>1

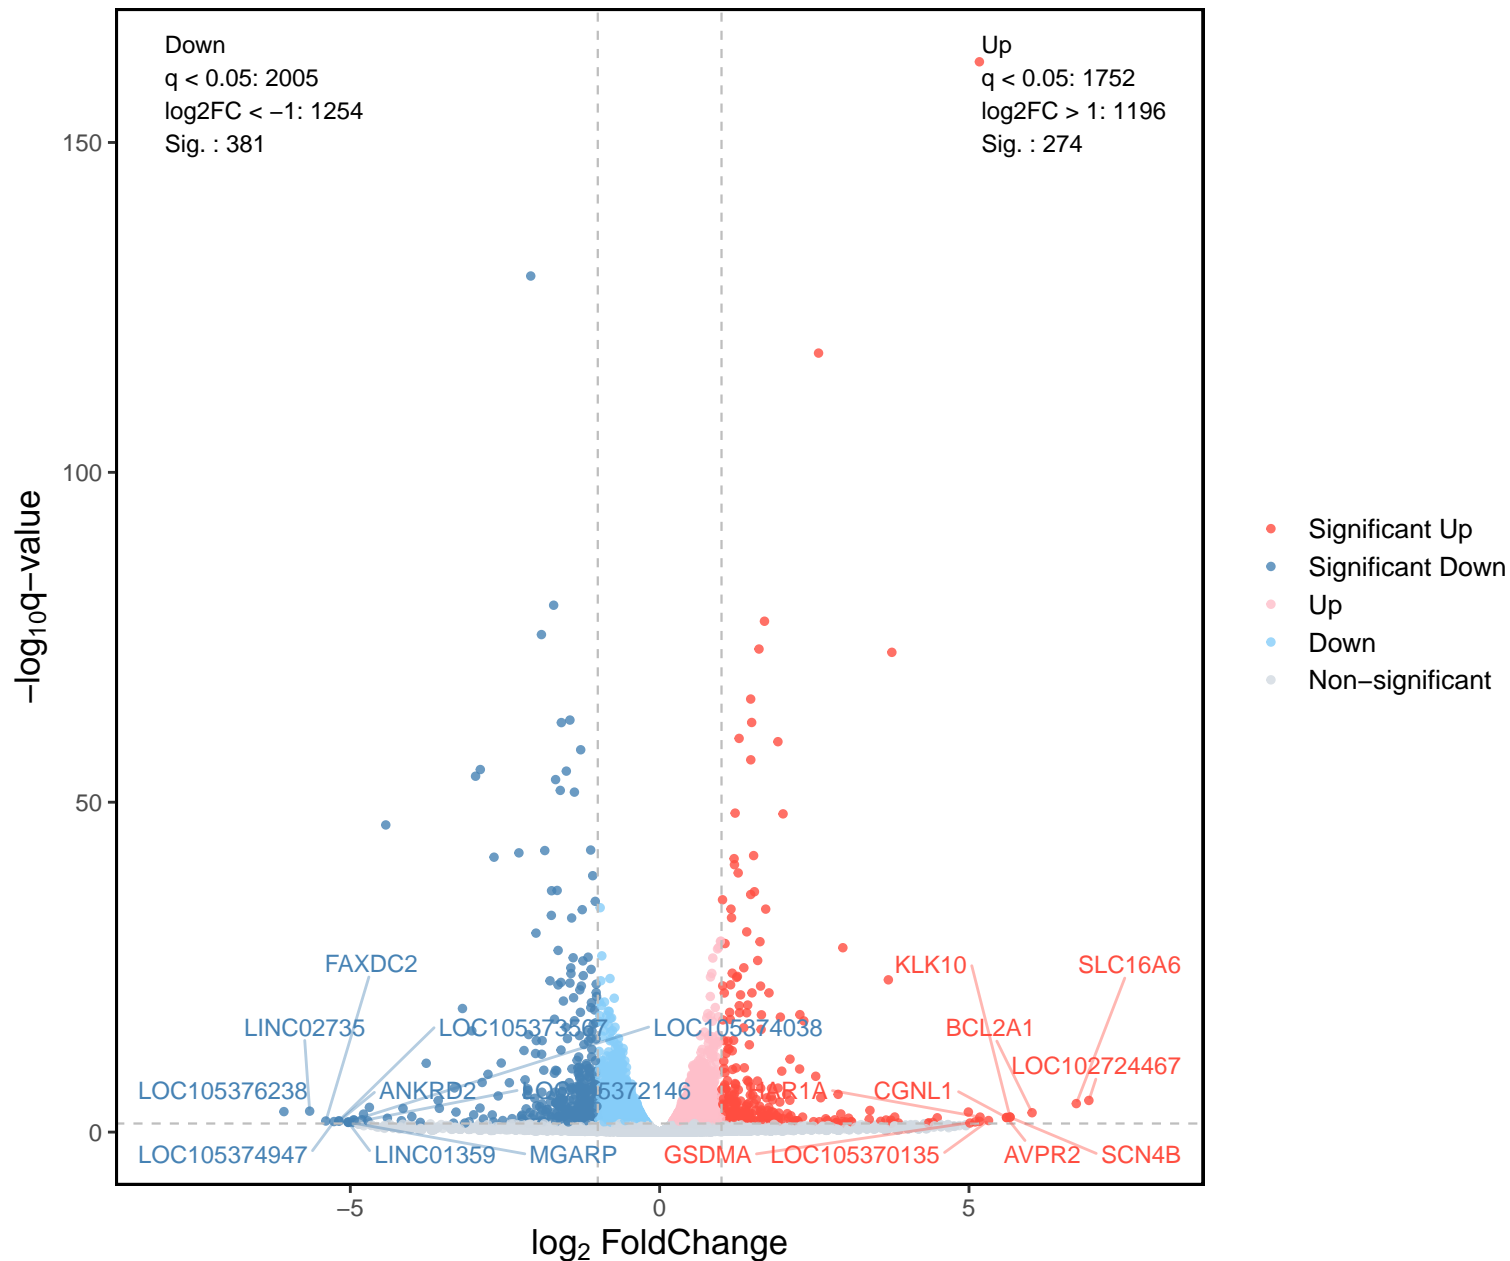

Supplement: Supplementary file 291 [file S-vs-C-volcano-q-val-0.05-FC-2.gene.pdf › Source data/1.RNA-Seq source data/2.HUVECs/result/1.4.different_expressed_gene/S-vs-C/S-vs-C-volcano-q-val-0.05-FC-2.gene.pdf]

Boxplot for FPKM Values

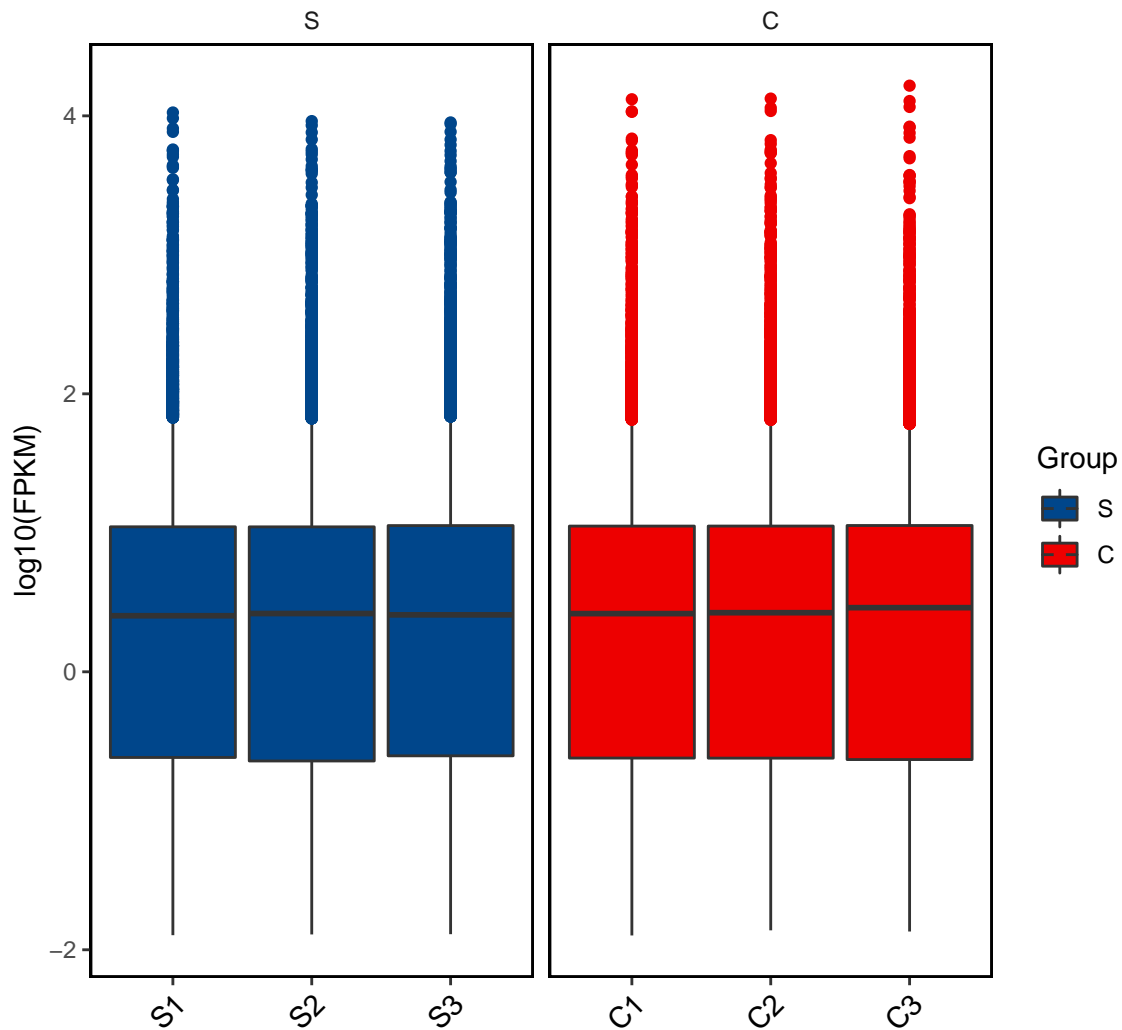

Supplement: Supplementary file 292 [file S-vs-C_FPKM_boxplot.pdf › Source data/1.RNA-Seq source data/2.HUVECs/result/1.4.different_expressed_gene/S-vs-C/S-vs-C_expression-summary/S-vs-C_FPKM_boxplot.pdf]

Gene expression in each sample

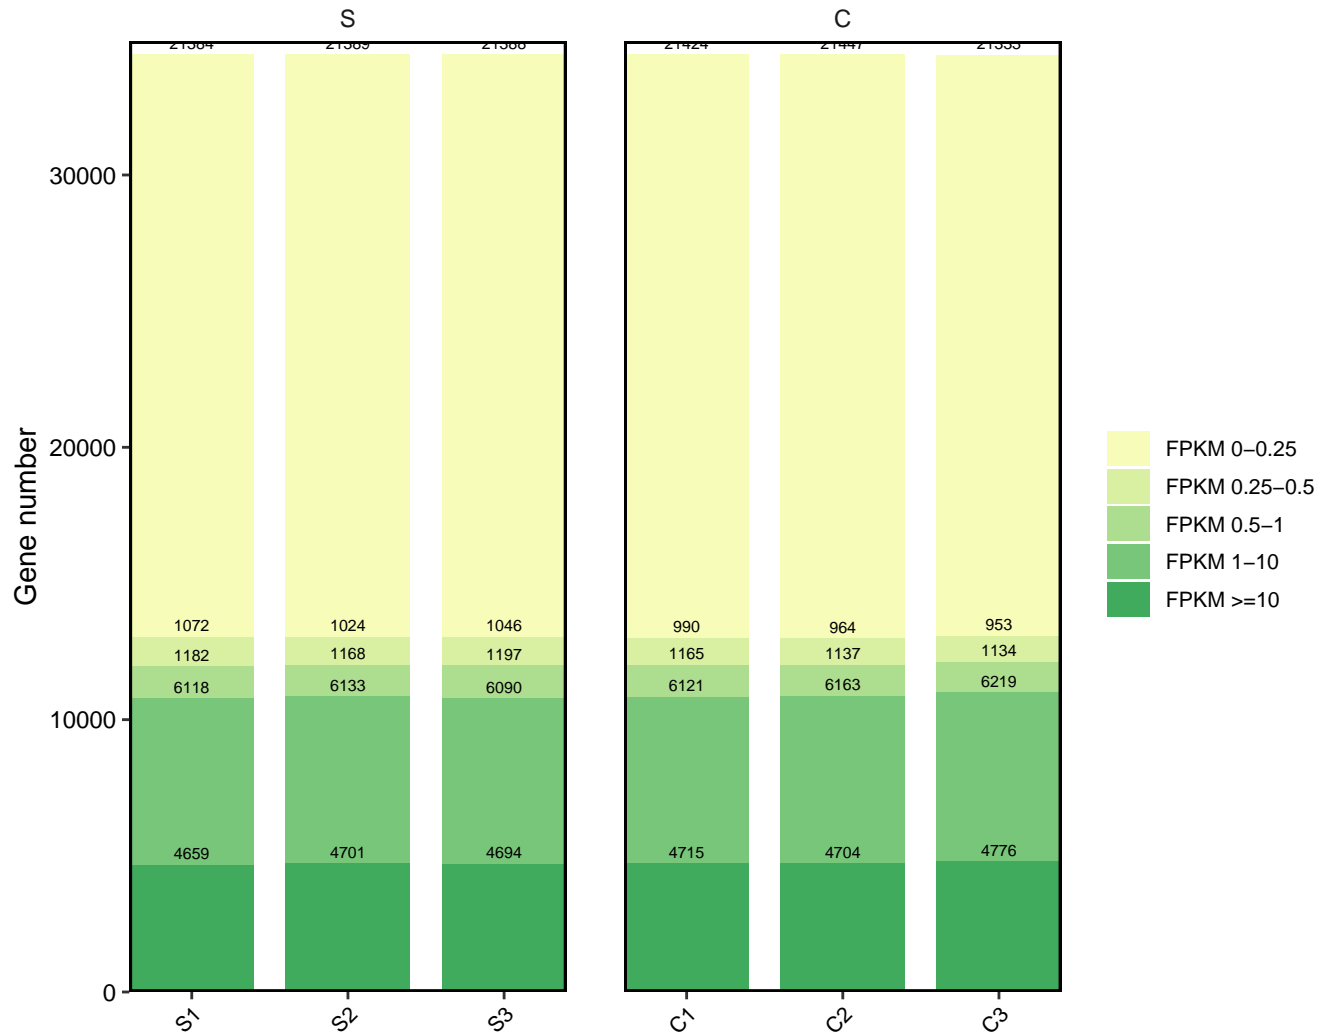

Supplement: Supplementary file 293 [file S-vs-C_FPKM_region.pdf › Source data/1.RNA-Seq source data/2.HUVECs/result/1.4.different_expressed_gene/S-vs-C/S-vs-C_expression-summary/S-vs-C_FPKM_region.pdf]

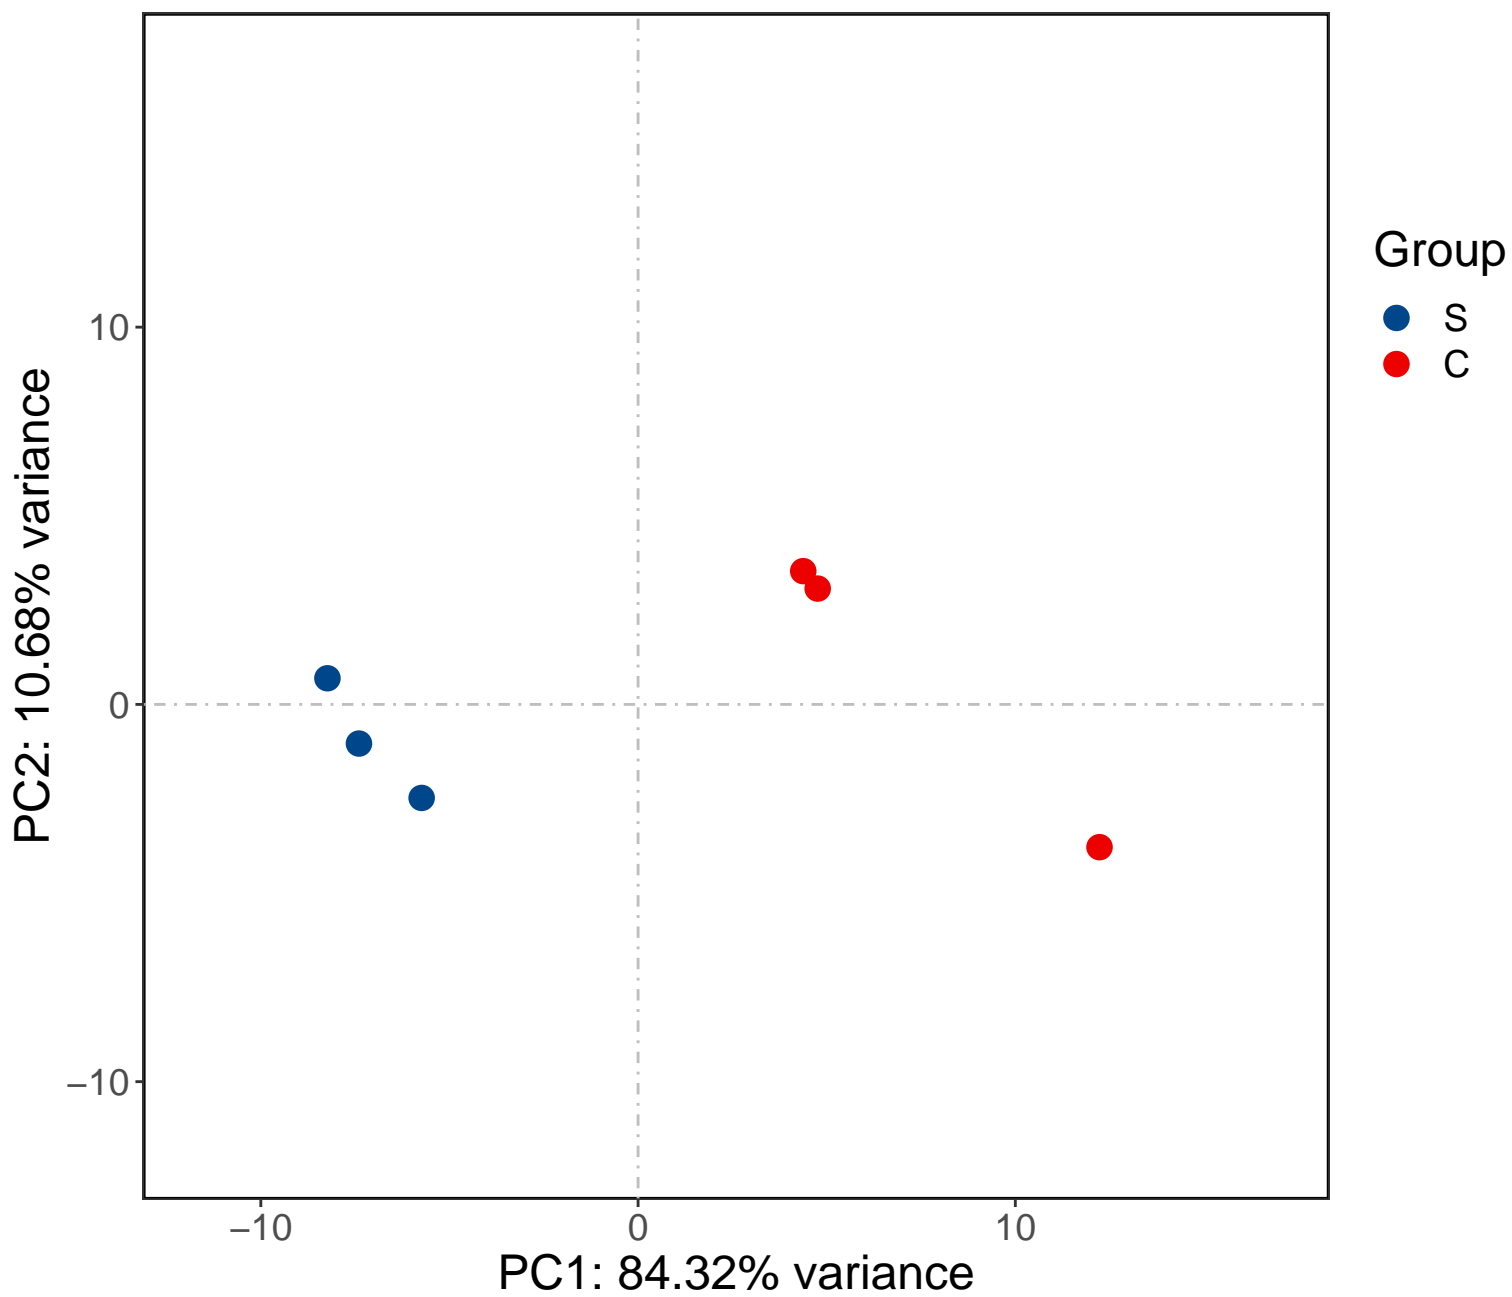

Supplement: Supplementary file 294 [file S-vs-C_PCA_1.pdf › Source data/1.RNA-Seq source data/2.HUVECs/result/1.4.different_expressed_gene/S-vs-C/S-vs-C_expression-summary/S-vs-C_PCA_1.pdf]

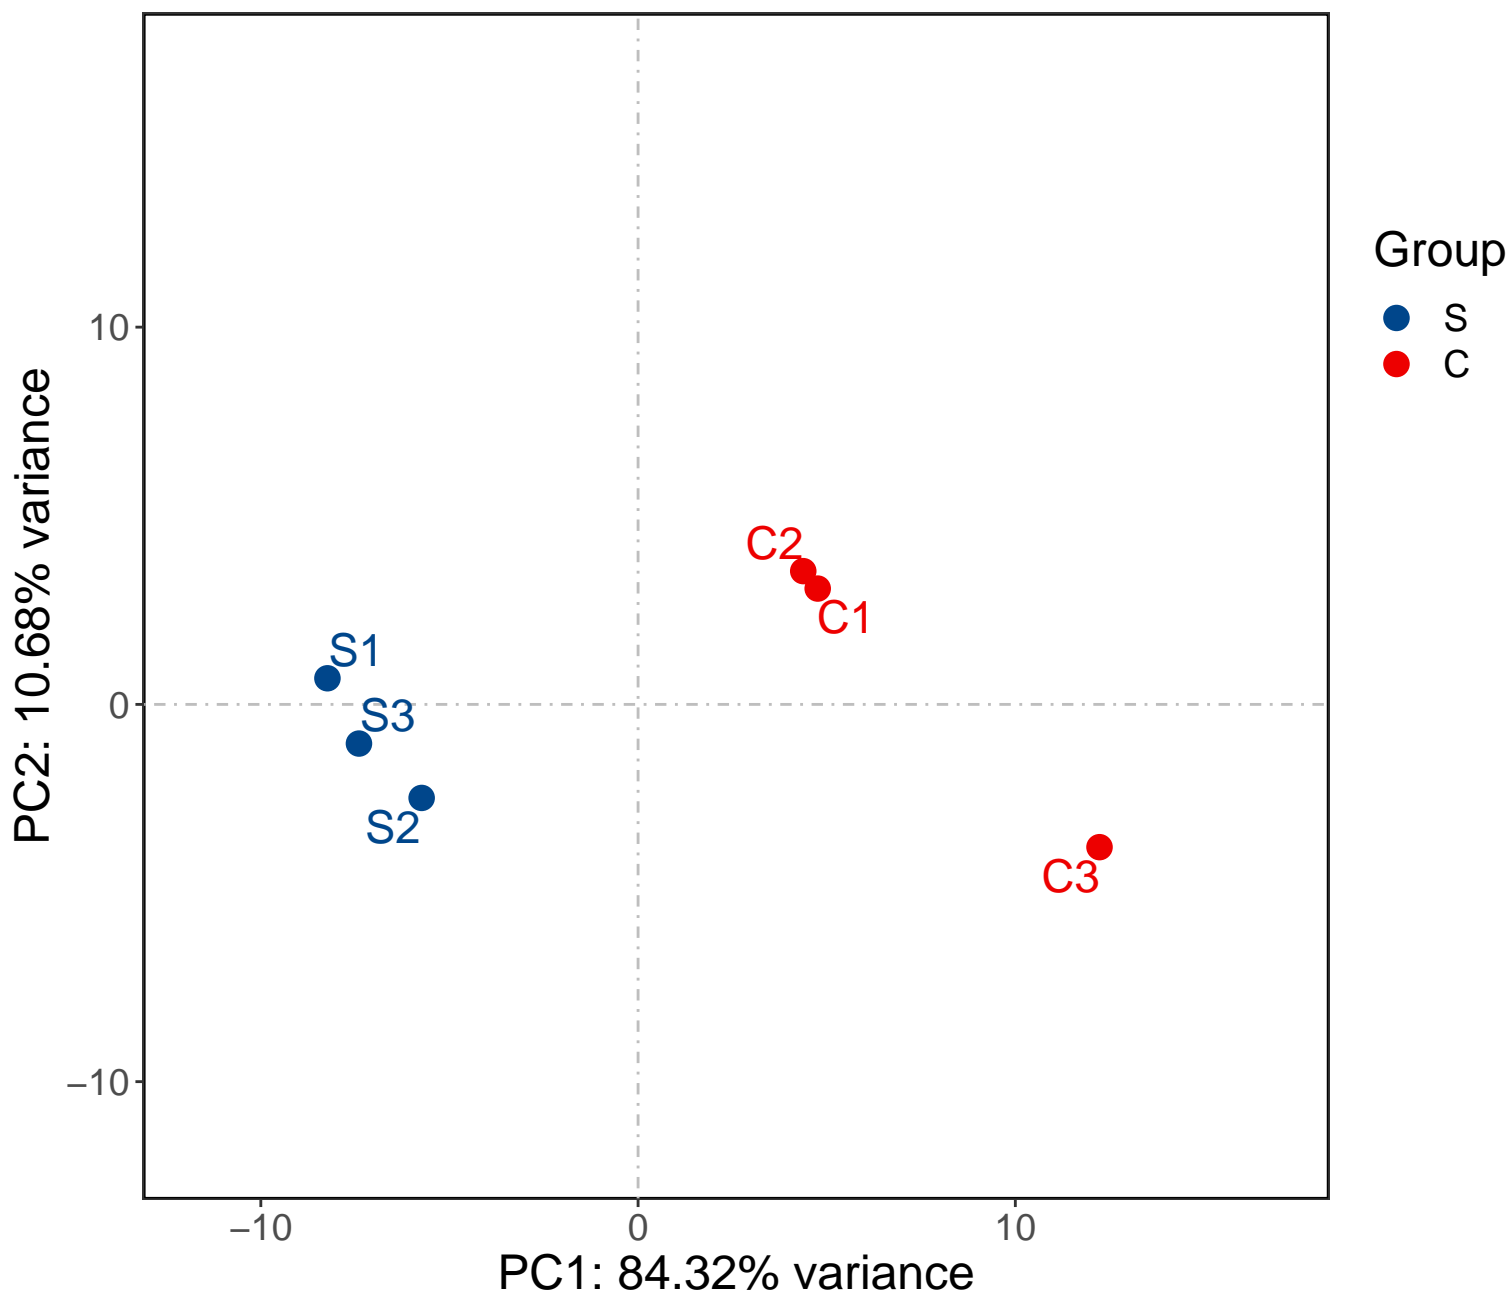

Supplement: Supplementary file 295 [file S-vs-C_PCA_2.pdf › Source data/1.RNA-Seq source data/2.HUVECs/result/1.4.different_expressed_gene/S-vs-C/S-vs-C_expression-summary/S-vs-C_PCA_2.pdf]

PCA 3D figure

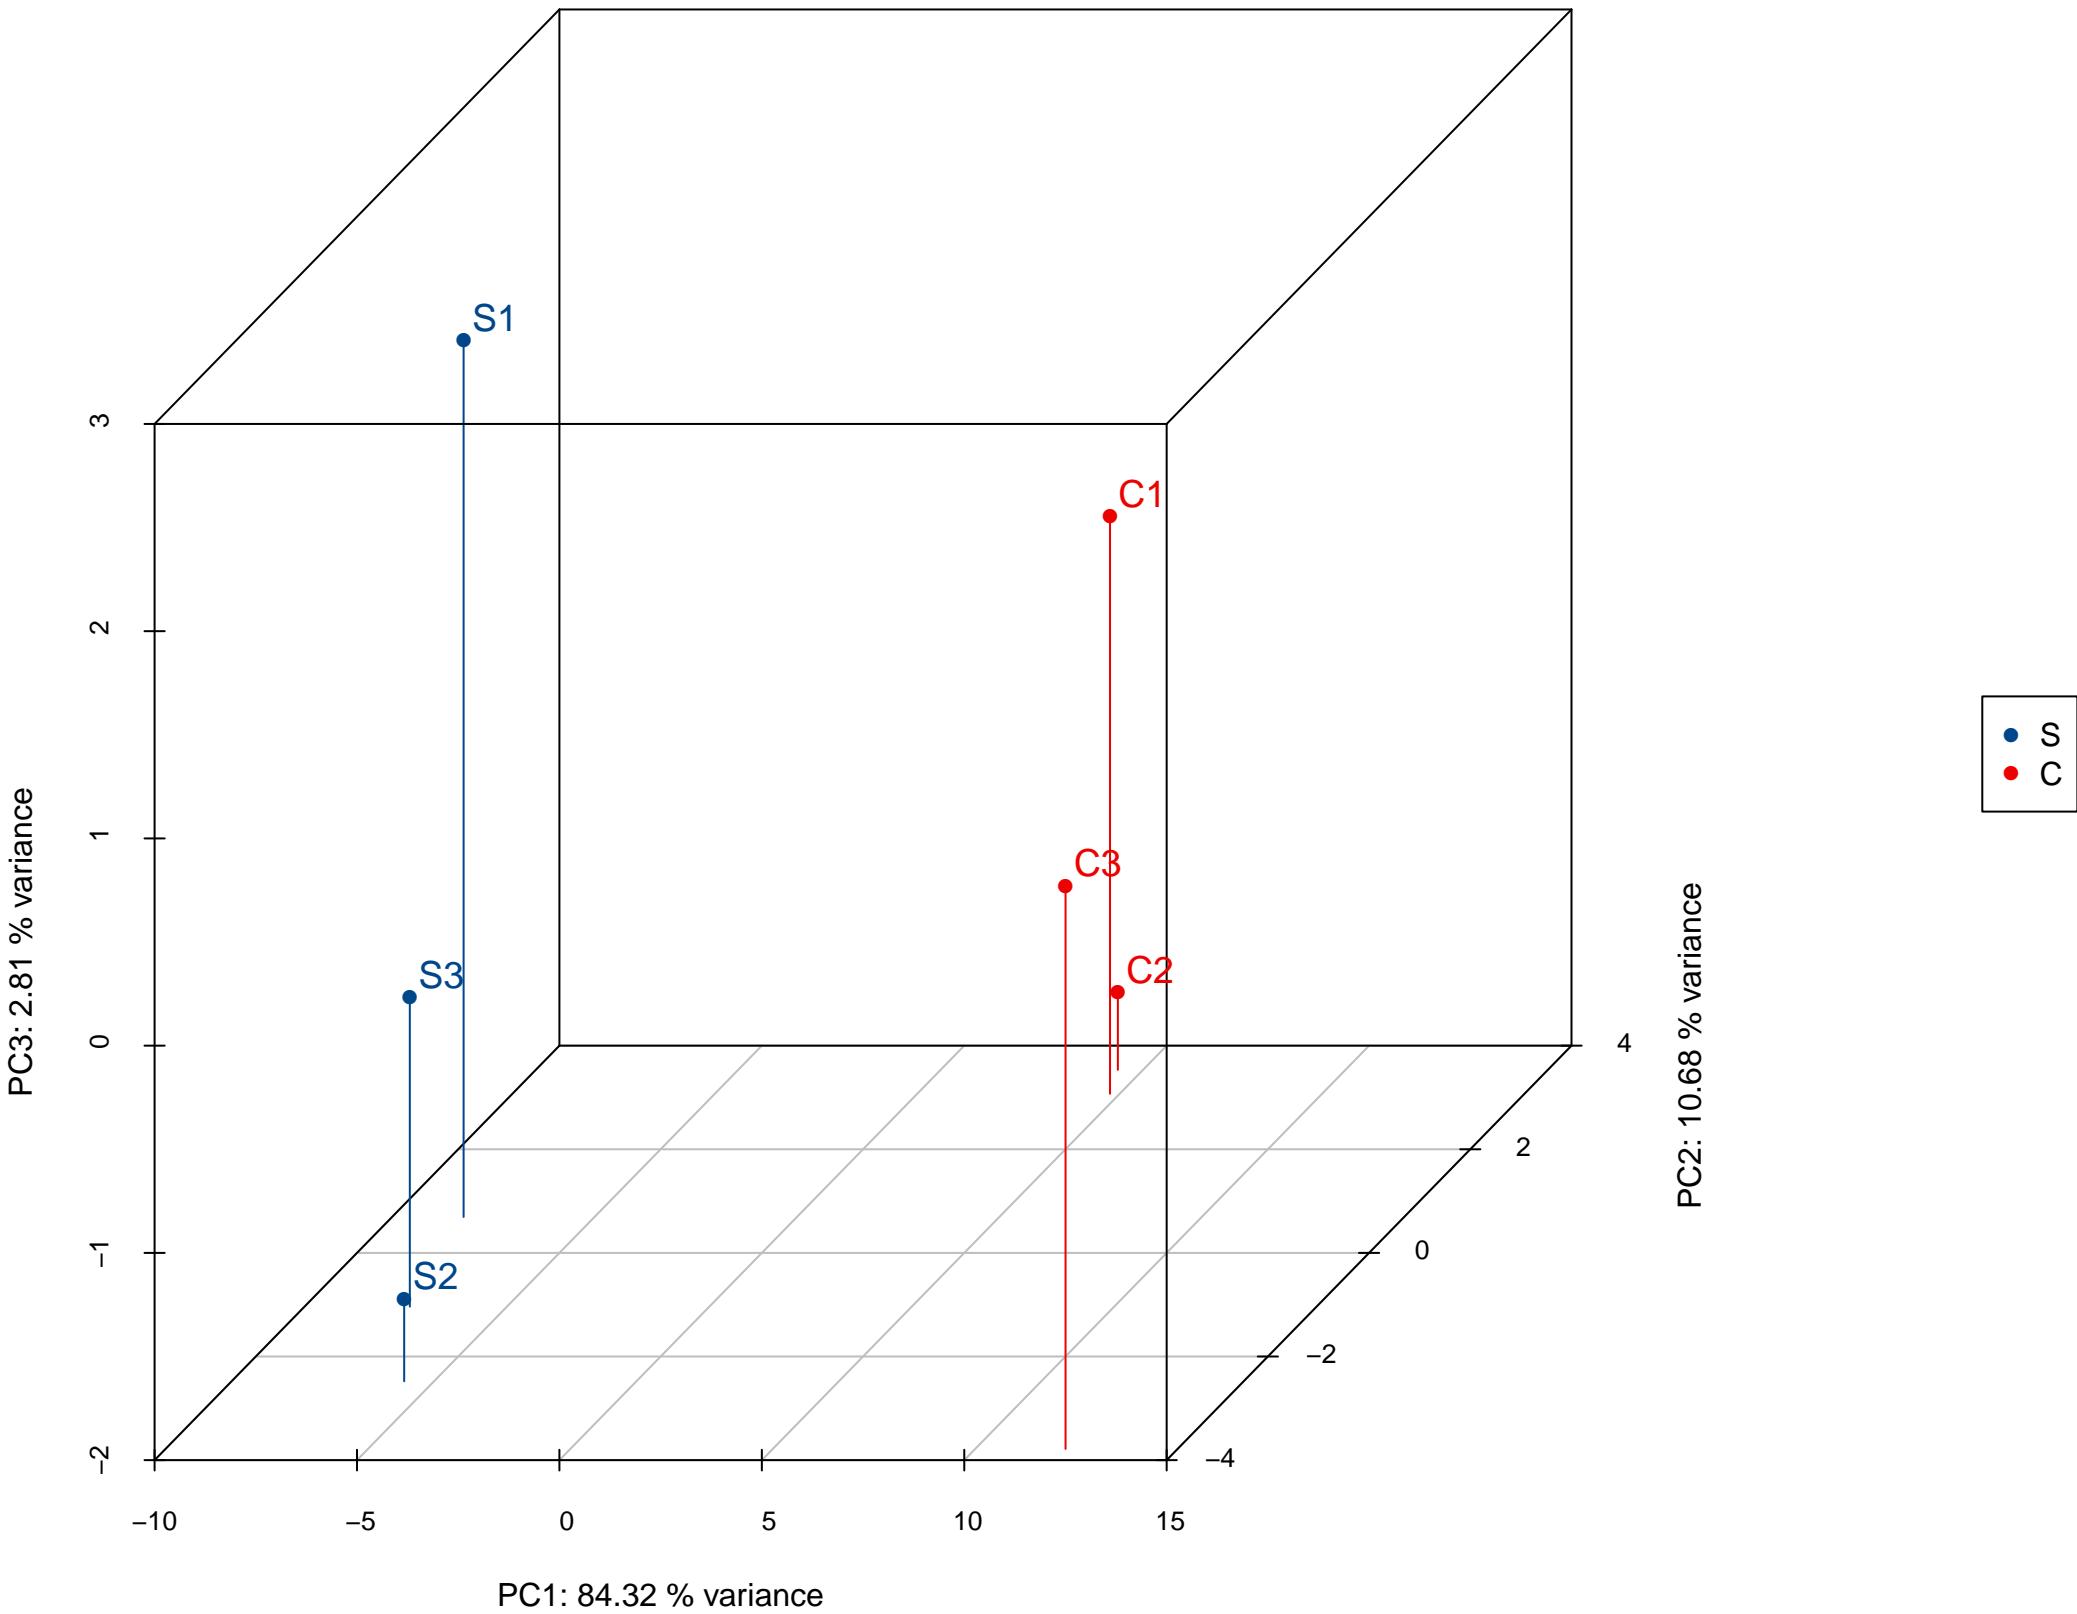

Supplement: Supplementary file 296 [file S-vs-C_PCA_3D.pdf › Source data/1.RNA-Seq source data/2.HUVECs/result/1.4.different_expressed_gene/S-vs-C/S-vs-C_expression-summary/S-vs-C_PCA_3D.pdf]

Sample-to-Sample distances



Supplement: Supplementary file 297 [file S-vs-C_Sample-to-Sample_distances_heatmap.pdf › Source data/1.RNA-Seq source data/2.HUVECs/result/1.4.different_expressed_gene/S-vs-C/S-vs-C_expression-summary/S-vs-C_Sample-to-Sample_distances_heatmap.pdf]

Gene expression in each sample

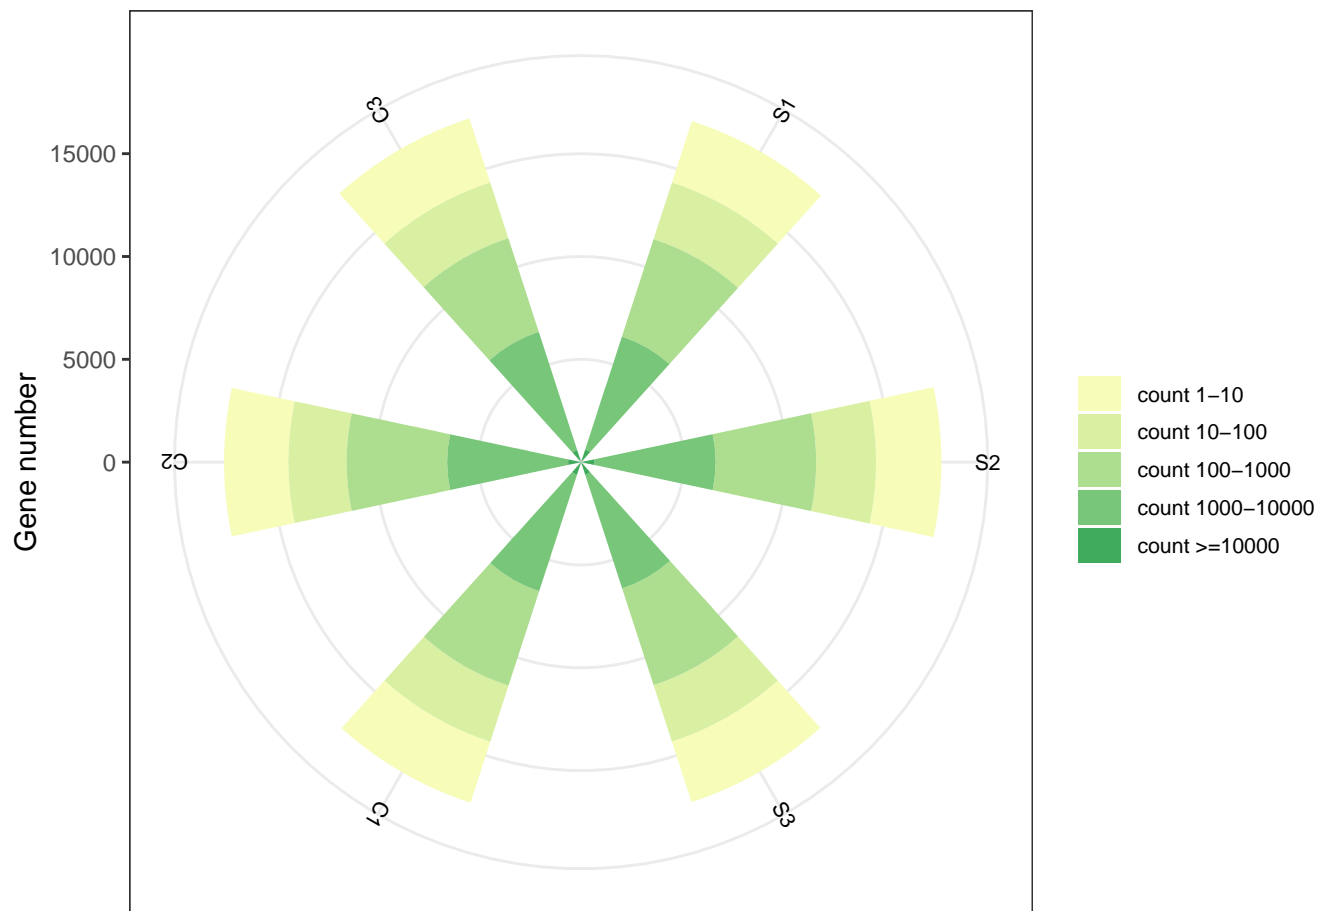

Supplement: Supplementary file 298 [file S-vs-C_count_region.pdf › Source data/1.RNA-Seq source data/2.HUVECs/result/1.4.different_expressed_gene/S-vs-C/S-vs-C_expression-summary/S-vs-C_count_region.pdf]

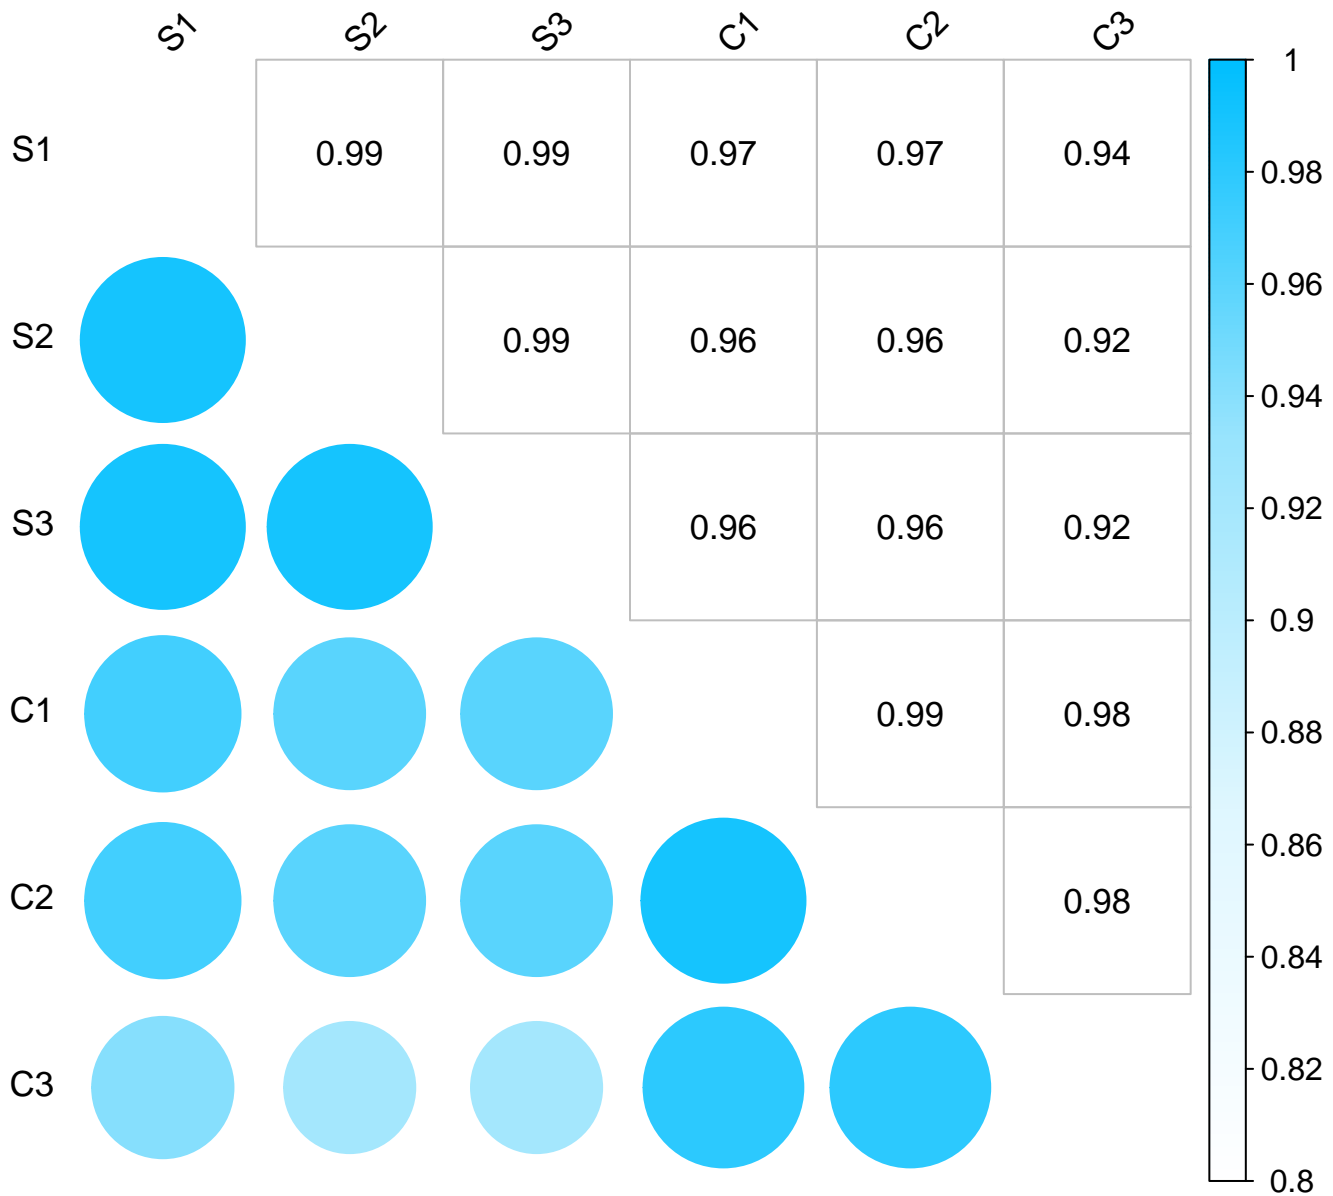

Supplement: Supplementary file 299 [file S-vs-C_heatmap-coefficient_matrix.pdf › Source data/1.RNA-Seq source data/2.HUVECs/result/1.4.different_expressed_gene/S-vs-C/S-vs-C_expression-summary/S-vs-C_heatmap-coefficient_matrix.pdf]

Statistic of Differently Expressed gene

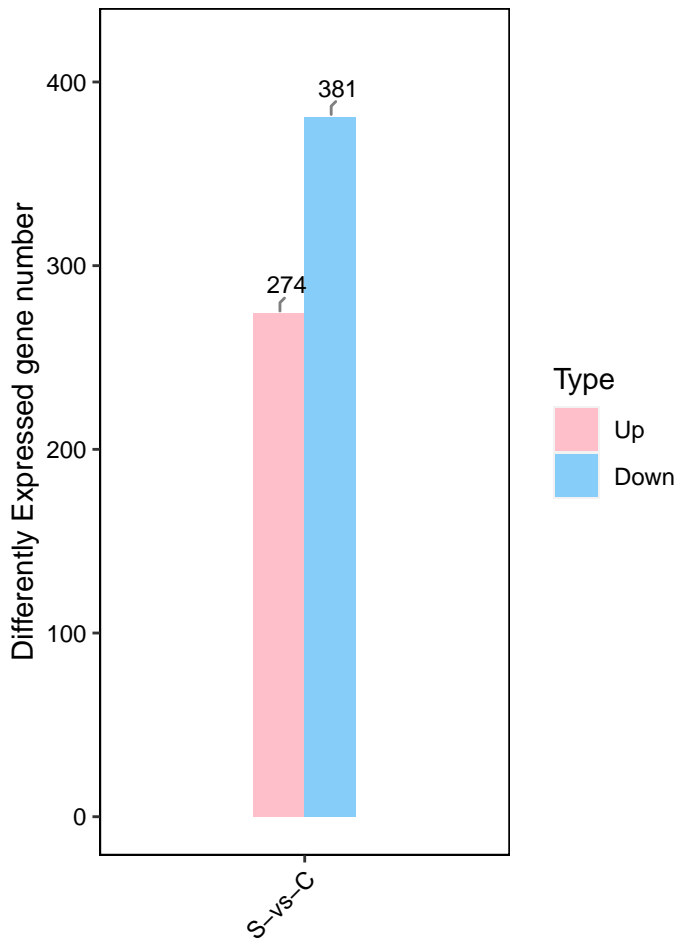

Supplement: Supplementary file 300 [file gene_diff_stat_barplot.pdf › Source data/1.RNA-Seq source data/2.HUVECs/result/1.4.different_expressed_gene/gene_diff_stat_barplot.pdf]

# translation(GO:0006412)

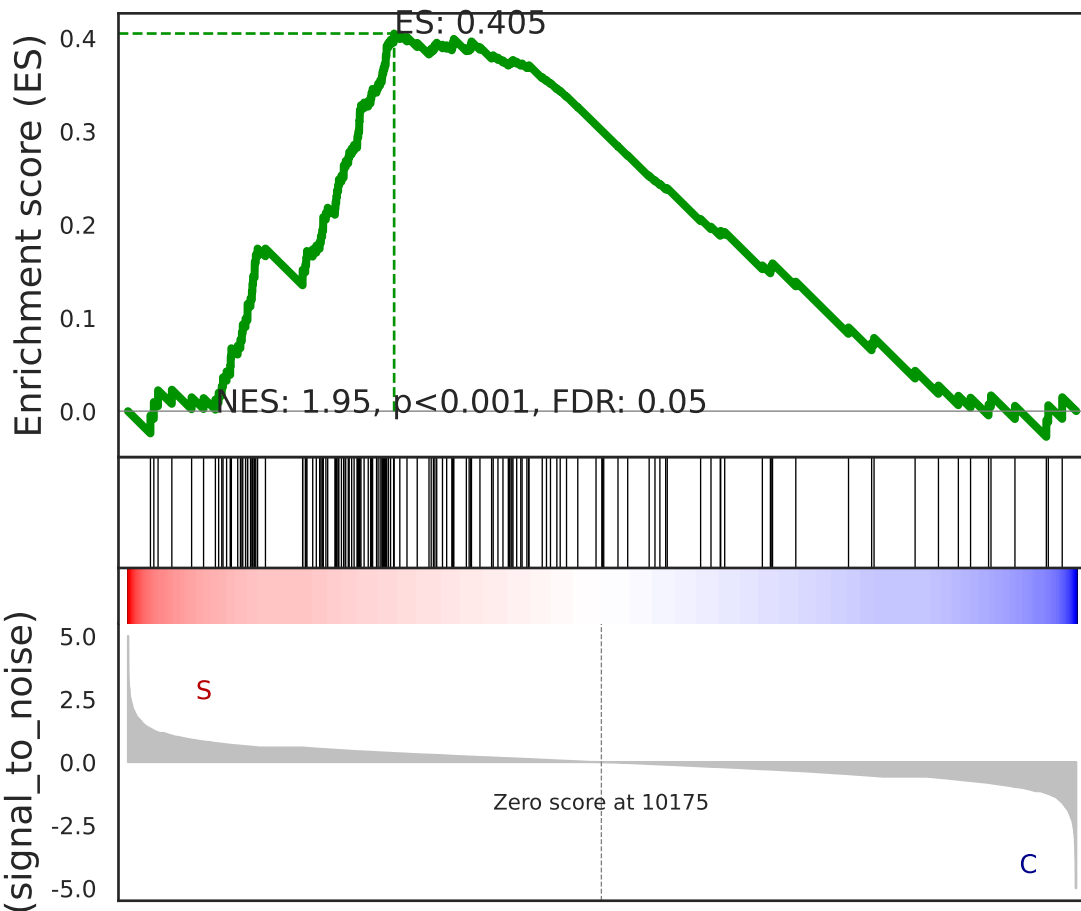

Supplement: Supplementary file 301 [file 10_translation(GO_0006412).gsea.pdf › Source data/1.RNA-Seq source data/2.HUVECs/result/1.6.GSEA/S-vs-C/go/BP/10_translation(GO_0006412).gsea.pdf]

translation(GO:0006412)

Heatmap of the Analyzed GeneSet

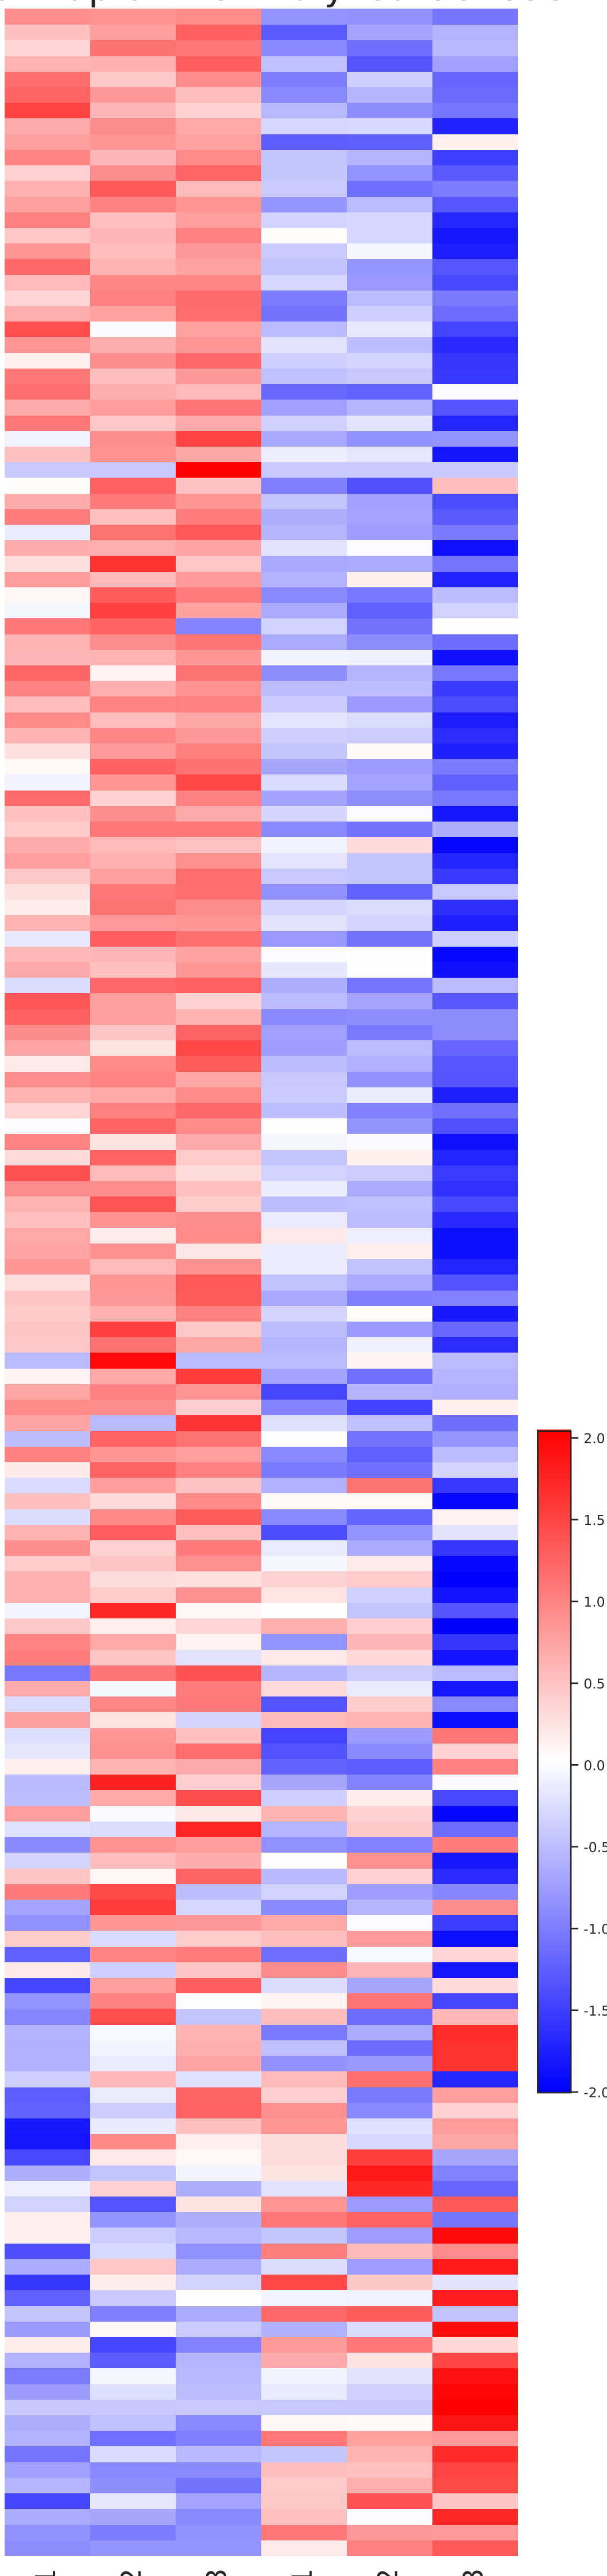

Supplement: Supplementary file 302 [file 10_translation(GO_0006412).heatmap.pdf › Source data/1.RNA-Seq source data/2.HUVECs/result/1.6.GSEA/S-vs-C/go/BP/10_translation(GO_0006412).heatmap.pdf]

antimicrobial humoral immune response mediated by antimic...(GO:0061844)

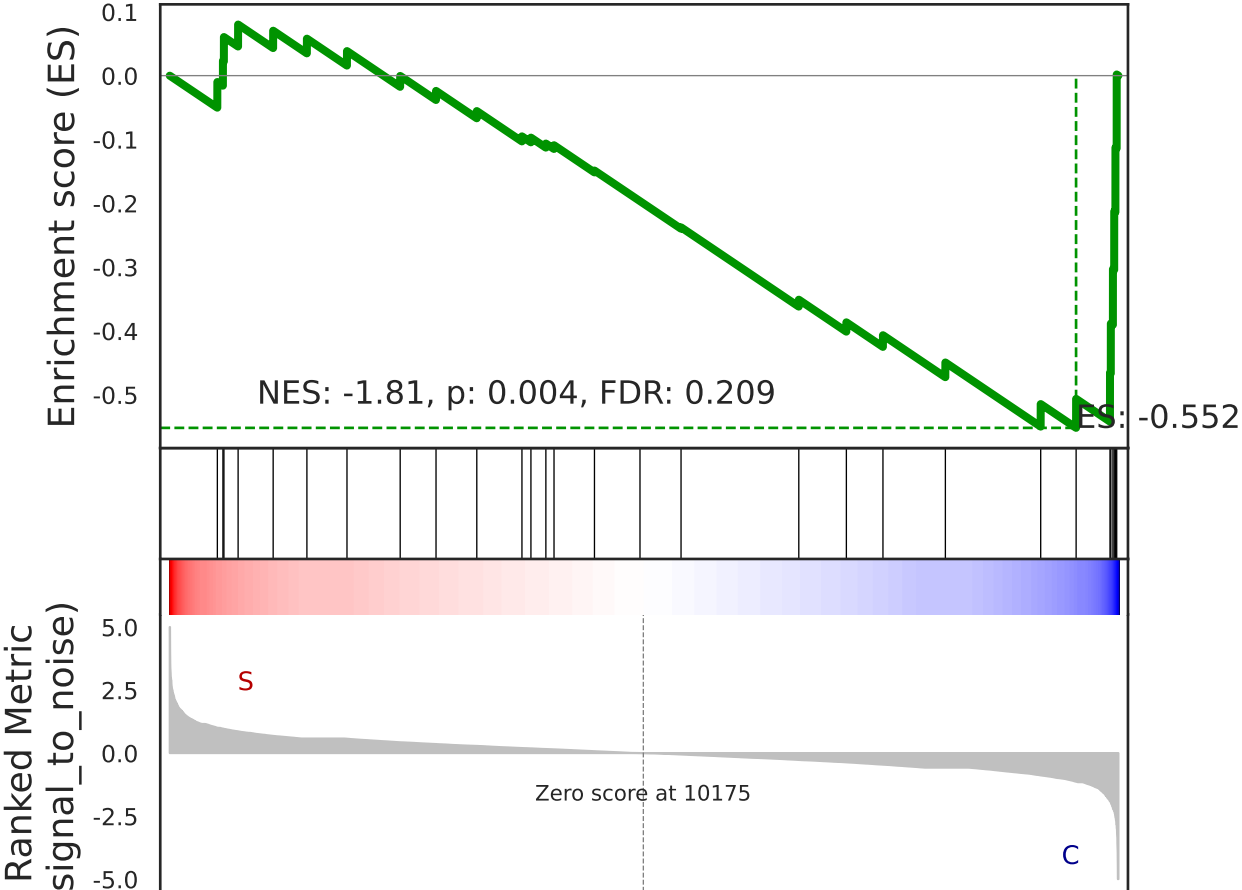

Supplement: Supplementary file 303 [file 1593_antimicrobial humoral immune response mediated by antimic...(GO_0061844).gsea.pdf › Source data/1.RNA-Seq source data/2.HUVECs/result/1.6.GSEA/S-vs-C/go/BP/1593_antimicrobial humoral immune response mediated by antimic...(GO_0061844).gsea.pdf]

# myoblast fusion(GO:0007520)

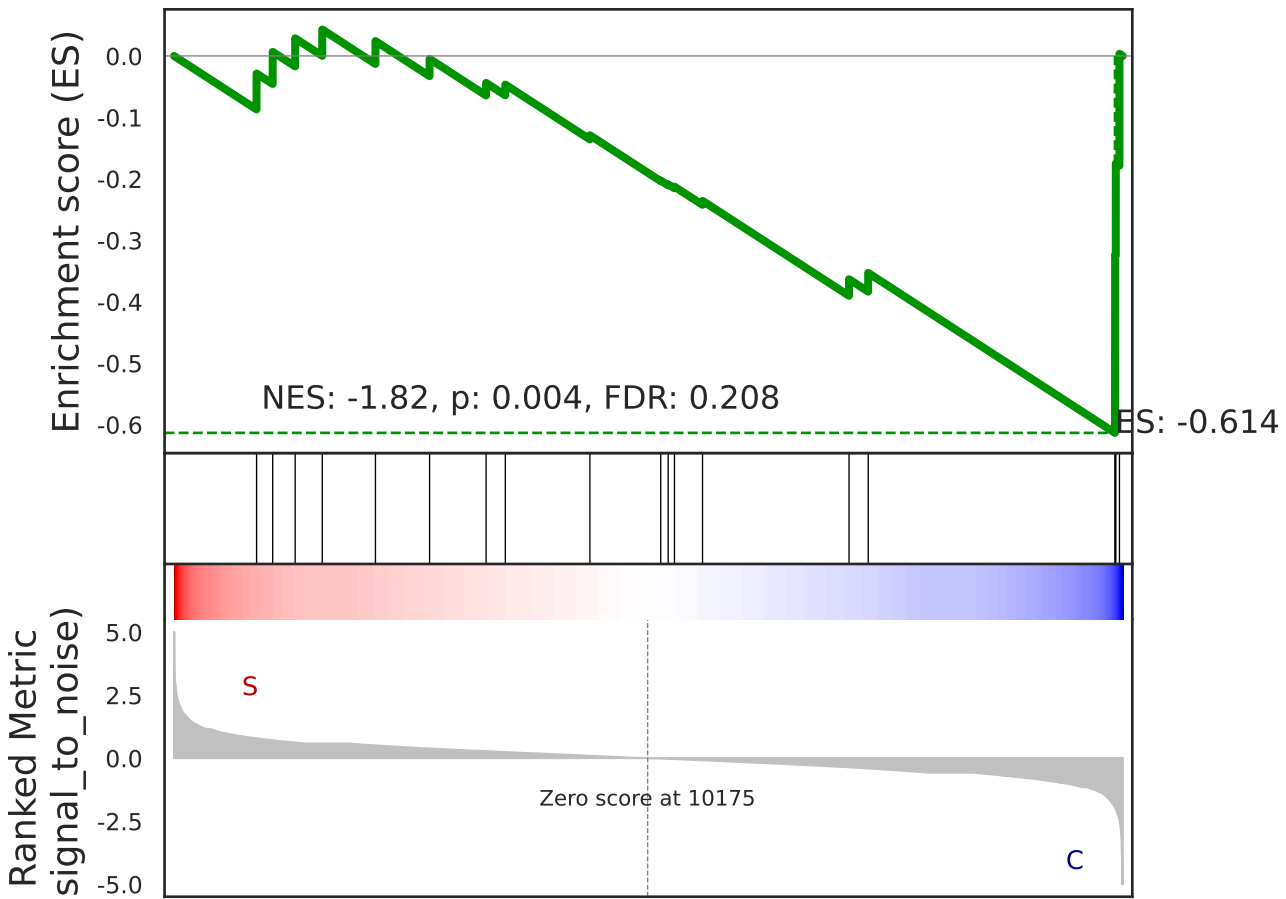

Supplement: Supplementary file 305 [file 1594_myoblast fusion(GO_0007520).gsea.pdf › Source data/1.RNA-Seq source data/2.HUVECs/result/1.6.GSEA/S-vs-C/go/BP/1594_myoblast fusion(GO_0007520).gsea.pdf]

# myoblast fusion(GO:0007520)

## Heatmap of the Analyzed GeneSet

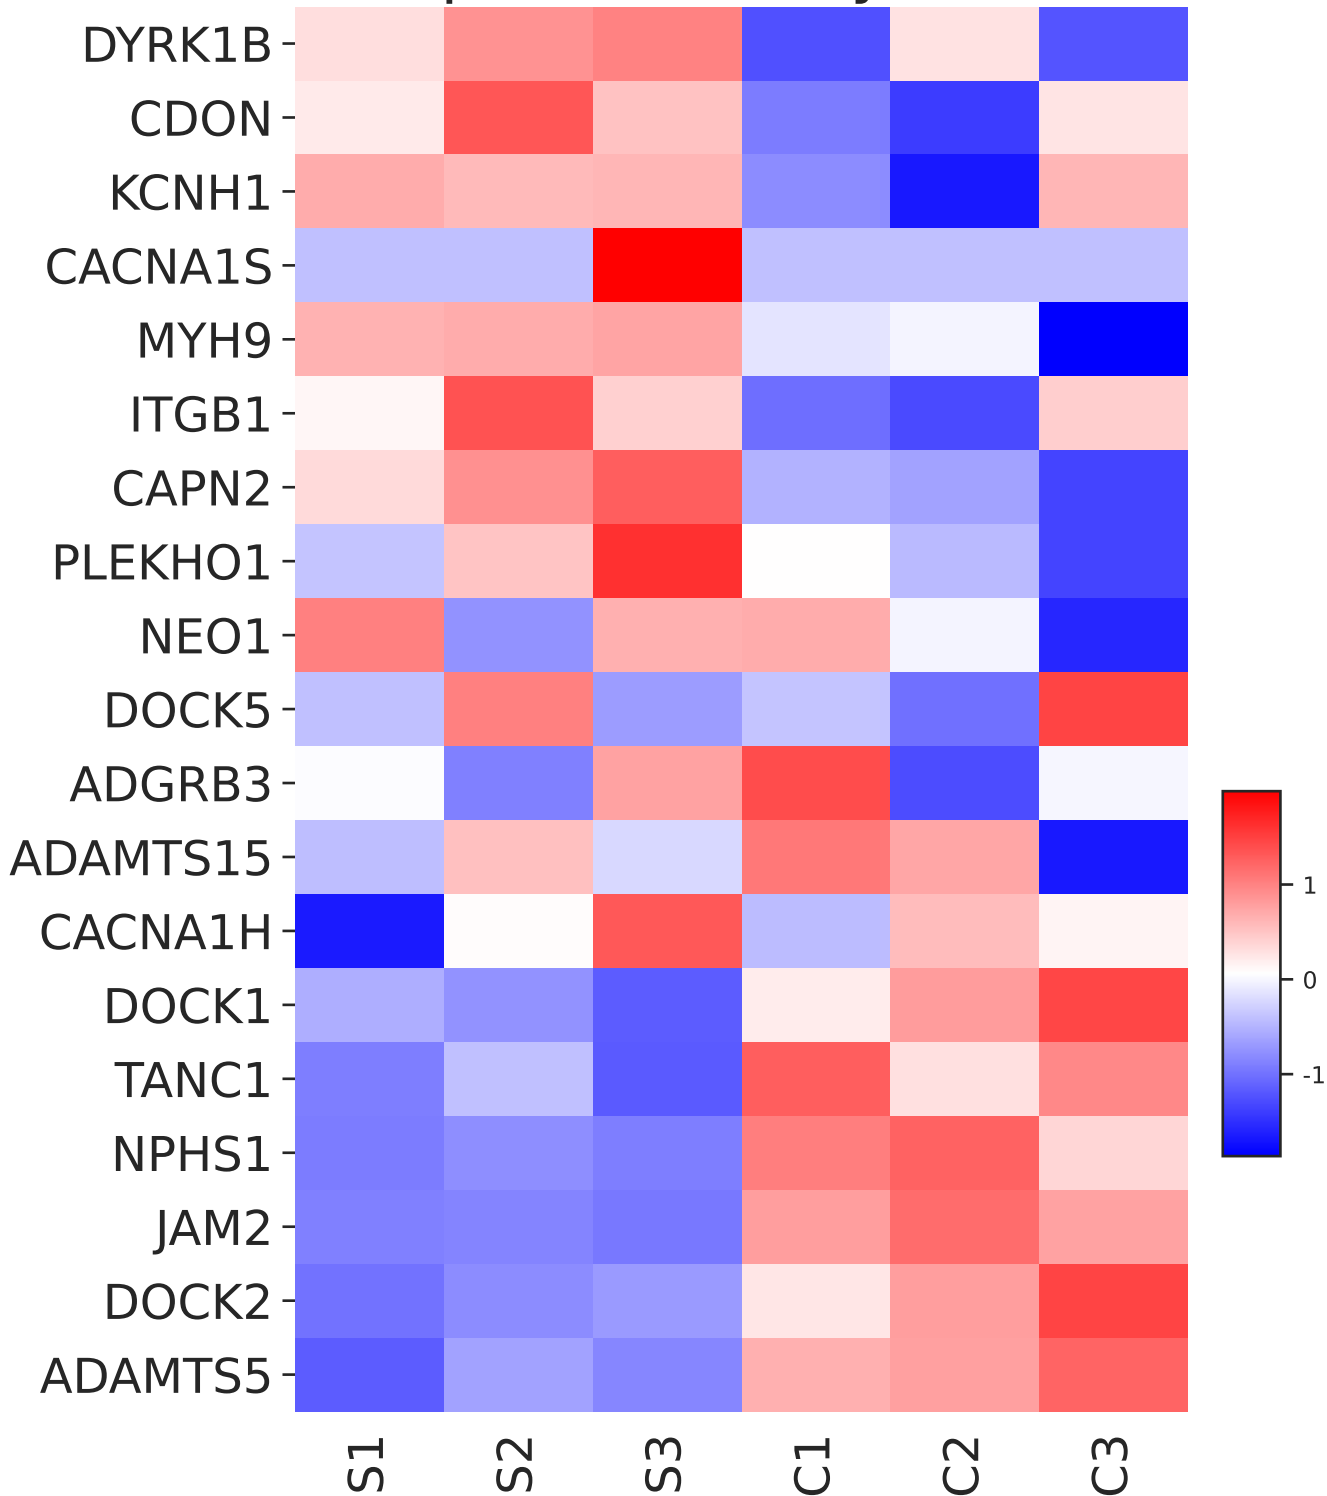

Supplement: Supplementary file 306 [file 1594_myoblast fusion(GO_0007520).heatmap.pdf › Source data/1.RNA-Seq source data/2.HUVECs/result/1.6.GSEA/S-vs-C/go/BP/1594_myoblast fusion(GO_0007520).heatmap.pdf]
