# Supplementary figures and images for: Peptide-based Self-adaptive Implant Coating Sequentially Regulates Bone Regeneration to Enhance Interfacial Osseointegration (part 4 of 6)
Source: Research Square preprint supplement (doi:10.21203/rs.3.rs-5132912/v1), 2024-10-01

# tissue homeostasis(GO:0001894)

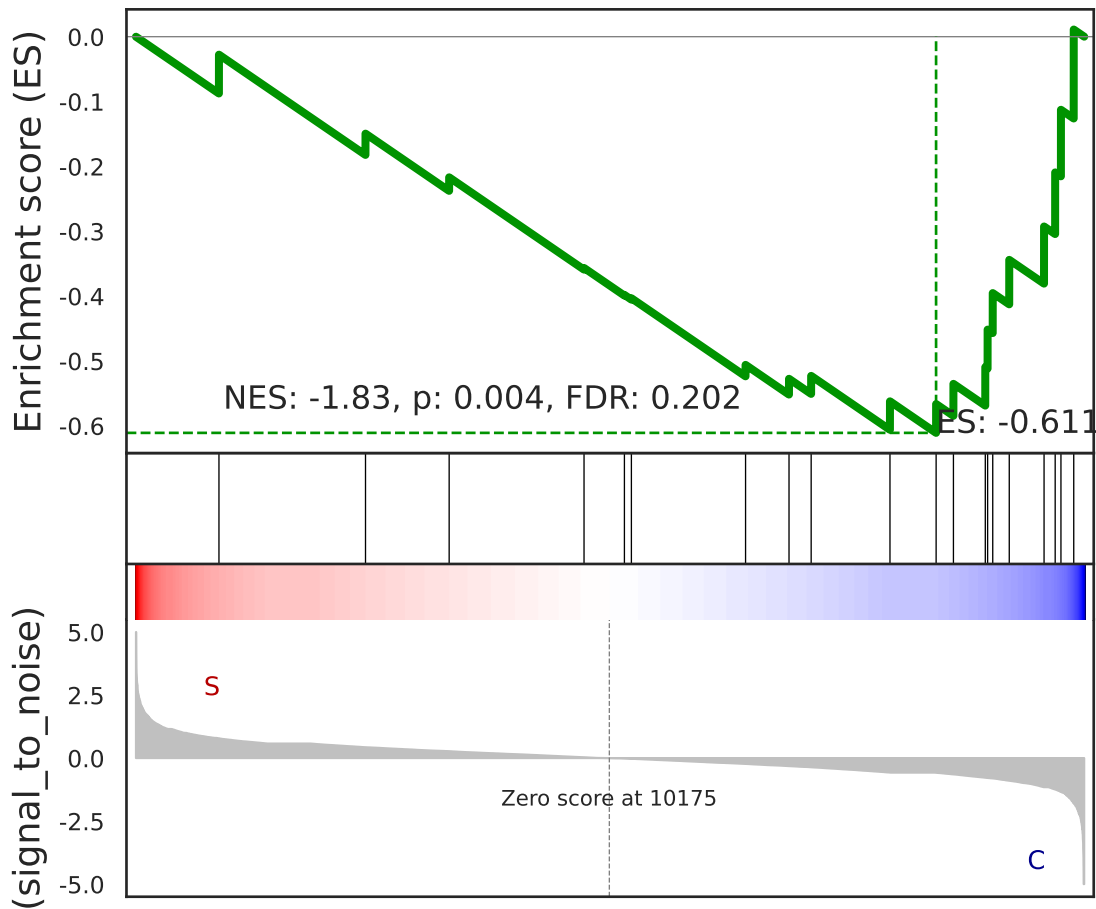

Supplement: Supplementary file 307 [file 1595_tissue homeostasis(GO_0001894).gsea.pdf › Source data/1.RNA-Seq source data/2.HUVECs/result/1.6.GSEA/S-vs-C/go/BP/1595_tissue homeostasis(GO_0001894).gsea.pdf]

# tissue homeostasis(GO:0001894)

## Heatmap of the Analyzed GeneSet

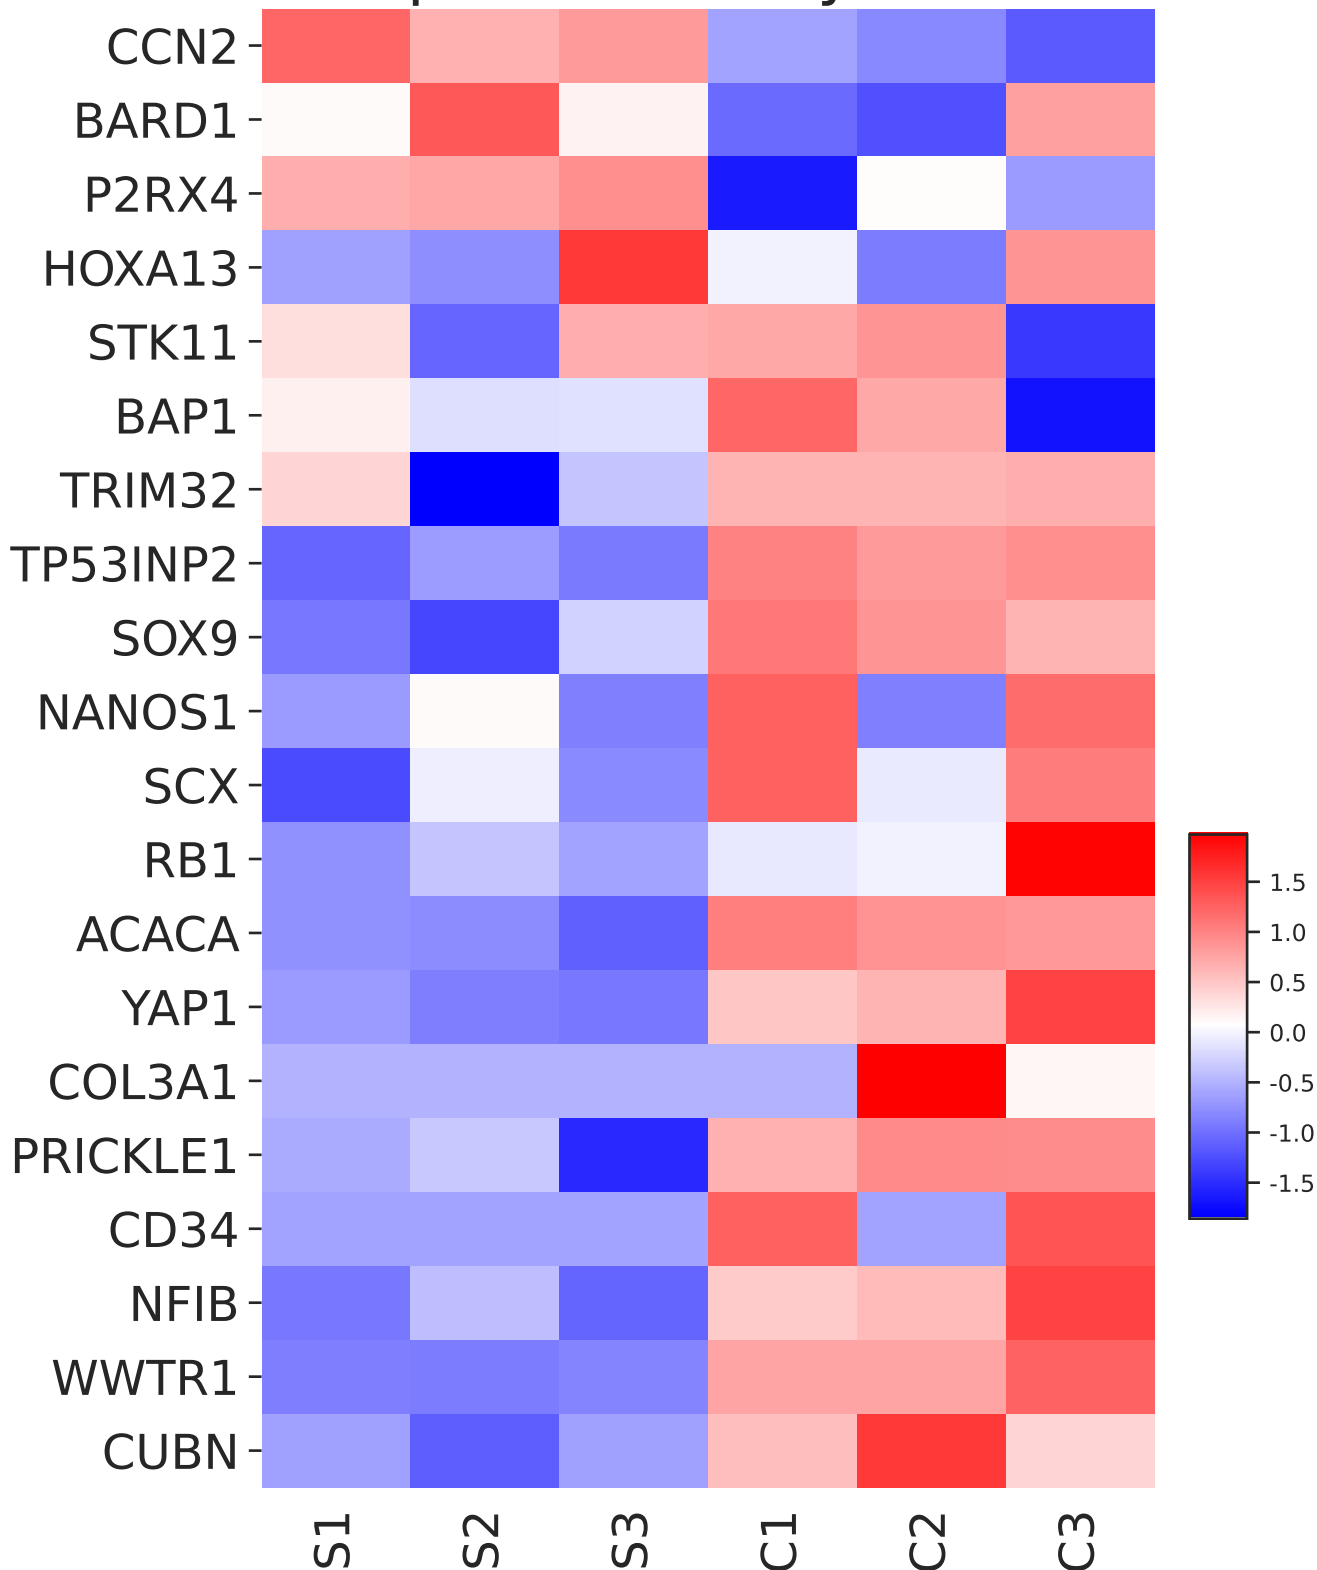

Supplement: Supplementary file 308 [file 1595_tissue homeostasis(GO_0001894).heatmap.pdf › Source data/1.RNA-Seq source data/2.HUVECs/result/1.6.GSEA/S-vs-C/go/BP/1595_tissue homeostasis(GO_0001894).heatmap.pdf]

# nucleosome assembly(GO:0006334)

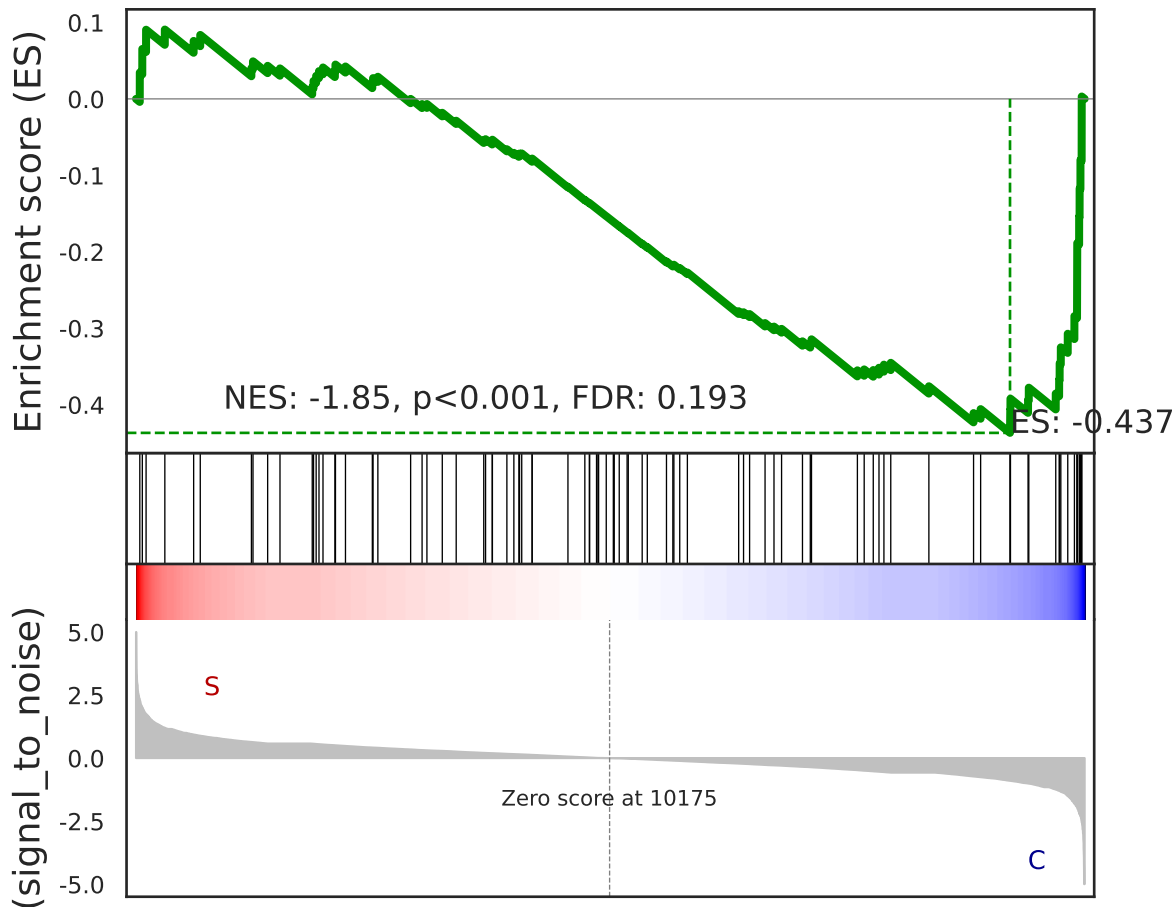

Supplement: Supplementary file 309 [file 1596_nucleosome assembly(GO_0006334).gsea.pdf › Source data/1.RNA-Seq source data/2.HUVECs/result/1.6.GSEA/S-vs-C/go/BP/1596_nucleosome assembly(GO_0006334).gsea.pdf]

nucleosome assembly(GO:0006334)  
Heatmap of the Analyzed GeneSet

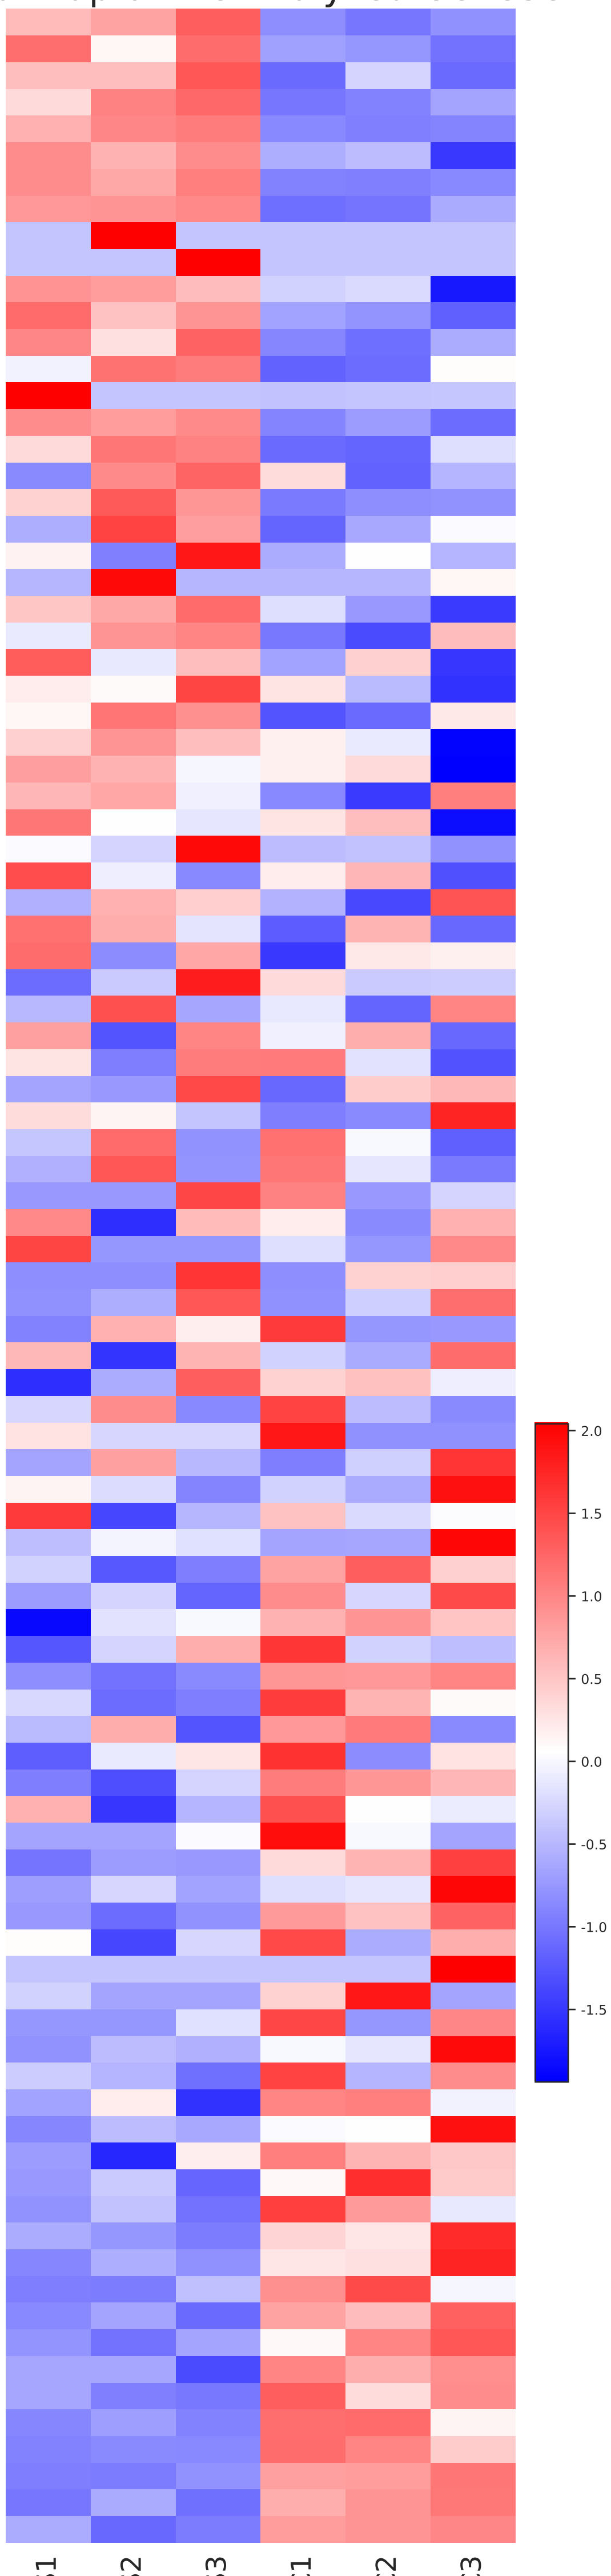

Supplement: Supplementary file 310 [file 1596_nucleosome assembly(GO_0006334).heatmap.pdf › Source data/1.RNA-Seq source data/2.HUVECs/result/1.6.GSEA/S-vs-C/go/BP/1596_nucleosome assembly(GO_0006334).heatmap.pdf]

transforming growth factor beta receptor signaling pathway(GO:0007179)

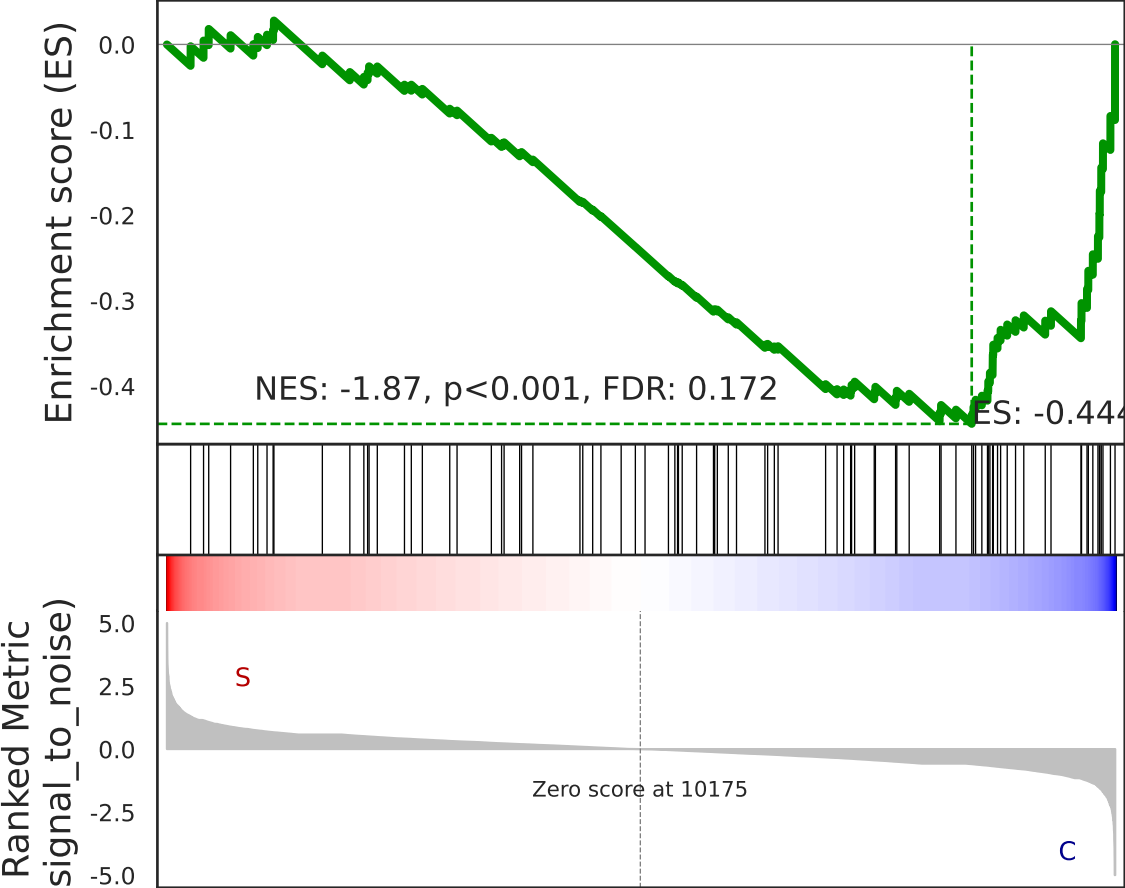

Supplement: Supplementary file 311 [file 1597_transforming growth factor beta receptor signaling pathway(GO_0007179).gsea.pdf › Source data/1.RNA-Seq source data/2.HUVECs/result/1.6.GSEA/S-vs-C/go/BP/1597_transforming growth factor beta receptor signaling pathway(GO_0007179).gsea.pdf]

# embryonic limb morphogenesis(GO:0030326)

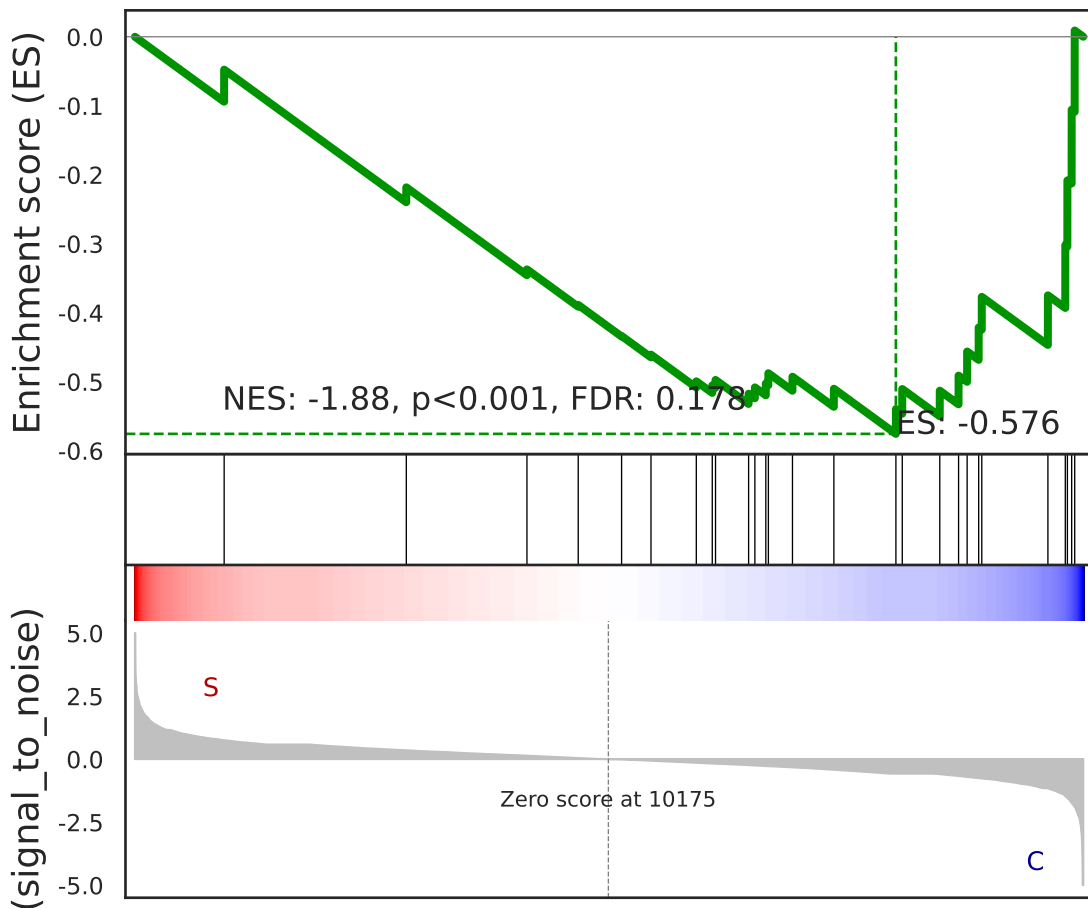

Supplement: Supplementary file 313 [file 1598_embryonic limb morphogenesis(GO_0030326).gsea.pdf › Source data/1.RNA-Seq source data/2.HUVECs/result/1.6.GSEA/S-vs-C/go/BP/1598_embryonic limb morphogenesis(GO_0030326).gsea.pdf]

embryonic limb morphogenesis(GO:0030326)  
Heatmap of the Analyzed GeneSet

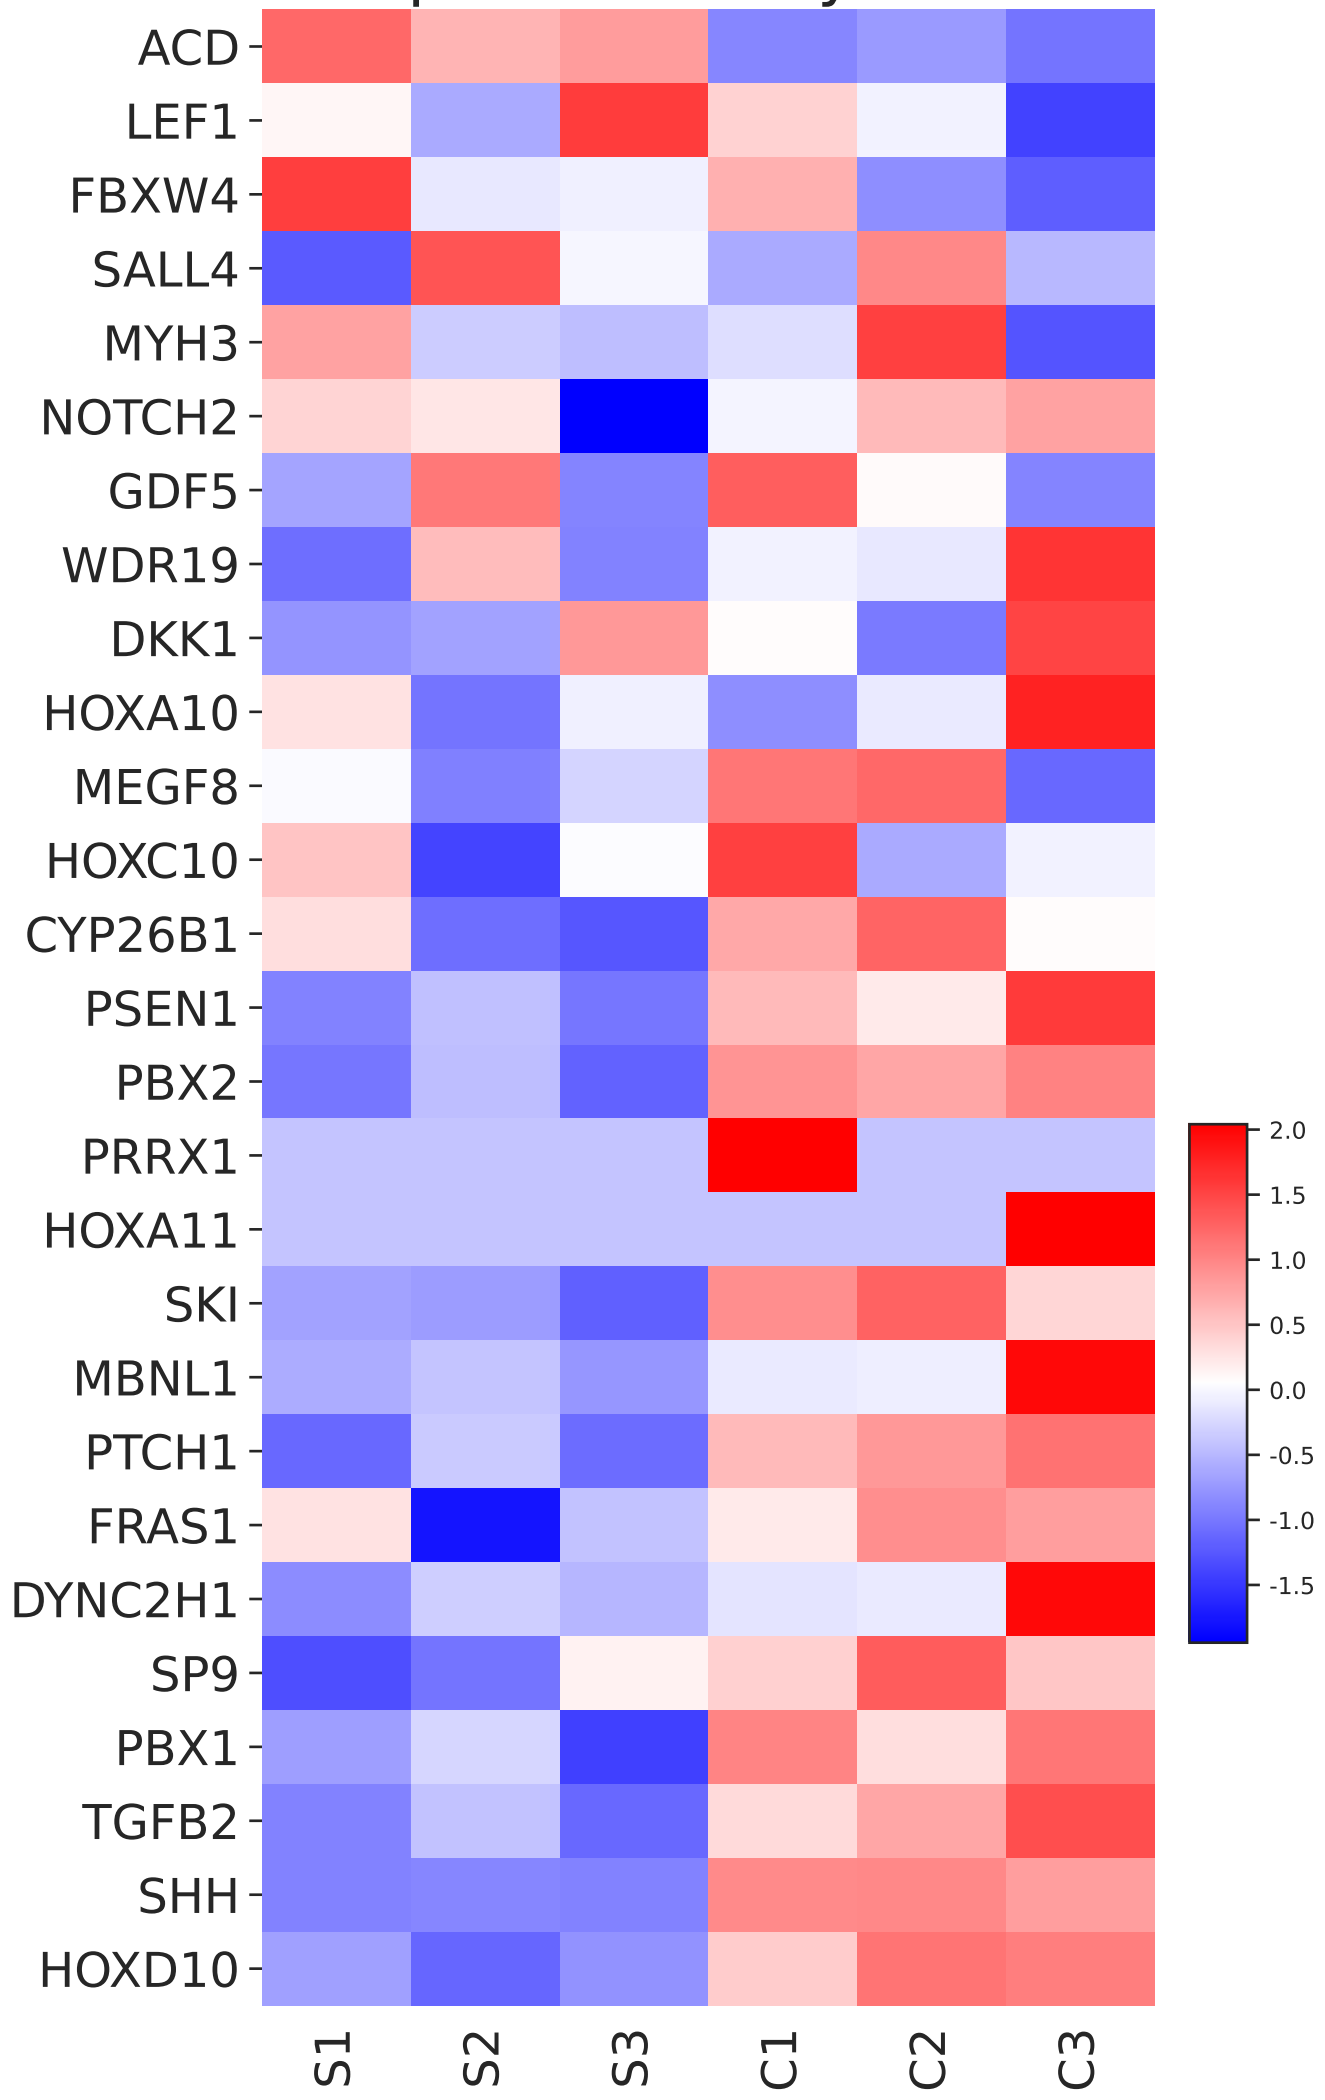

Supplement: Supplementary file 314 [file 1598_embryonic limb morphogenesis(GO_0030326).heatmap.pdf › Source data/1.RNA-Seq source data/2.HUVECs/result/1.6.GSEA/S-vs-C/go/BP/1598_embryonic limb morphogenesis(GO_0030326).heatmap.pdf]

# regulation of establishment of cell polarity(GO:2000114)

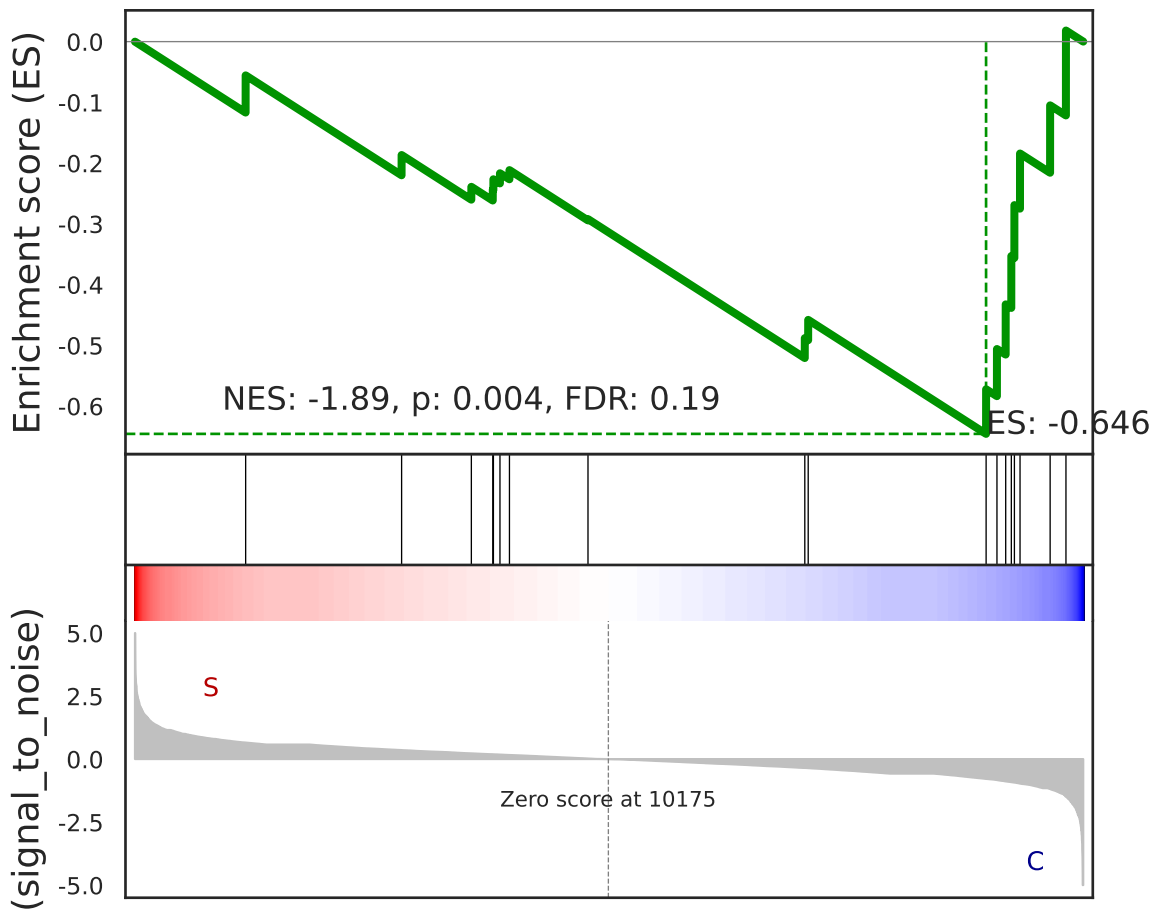

Supplement: Supplementary file 315 [file 1599_regulation of establishment of cell polarity(GO_2000114).gsea.pdf › Source data/1.RNA-Seq source data/2.HUVECs/result/1.6.GSEA/S-vs-C/go/BP/1599_regulation of establishment of cell polarity(GO_2000114).gsea.pdf]

regulation of establishment of cell polarity(GO:2000114)  
Heatmap of the Analyzed GeneSet

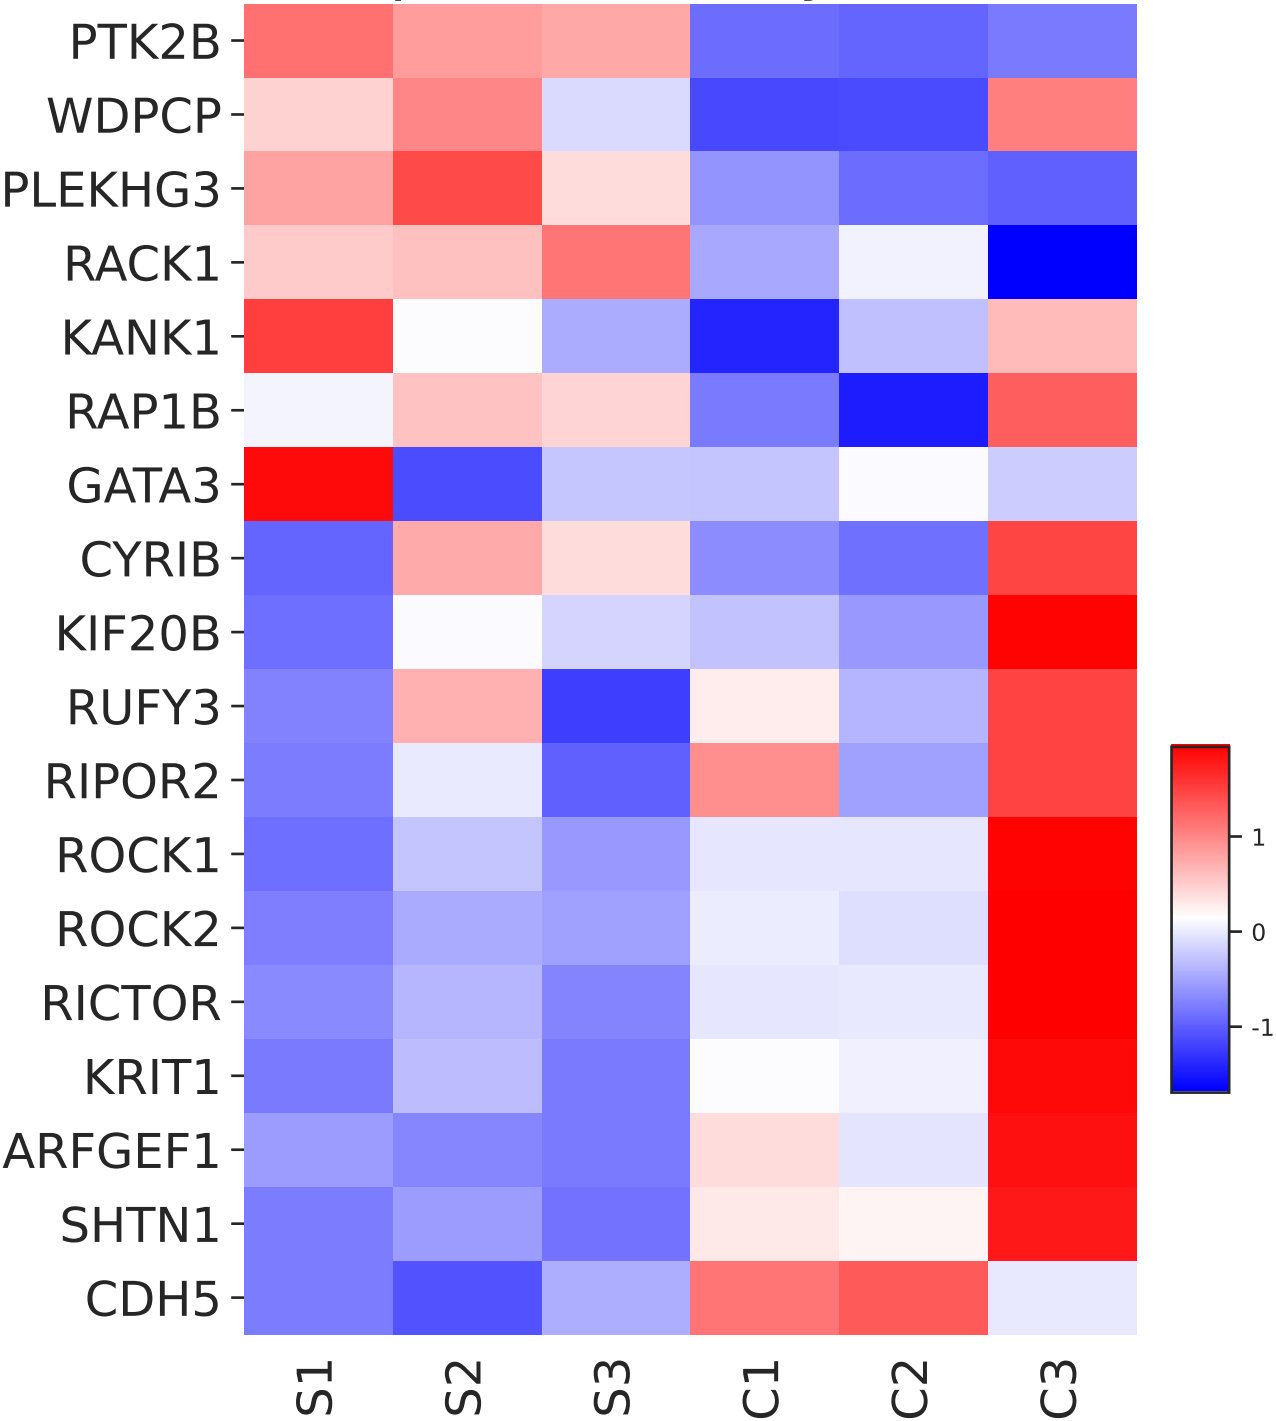

Supplement: Supplementary file 316 [file 1599_regulation of establishment of cell polarity(GO_2000114).heatmap.pdf › Source data/1.RNA-Seq source data/2.HUVECs/result/1.6.GSEA/S-vs-C/go/BP/1599_regulation of establishment of cell polarity(GO_2000114).heatmap.pdf]

# post-embryonic development(GO:0009791)

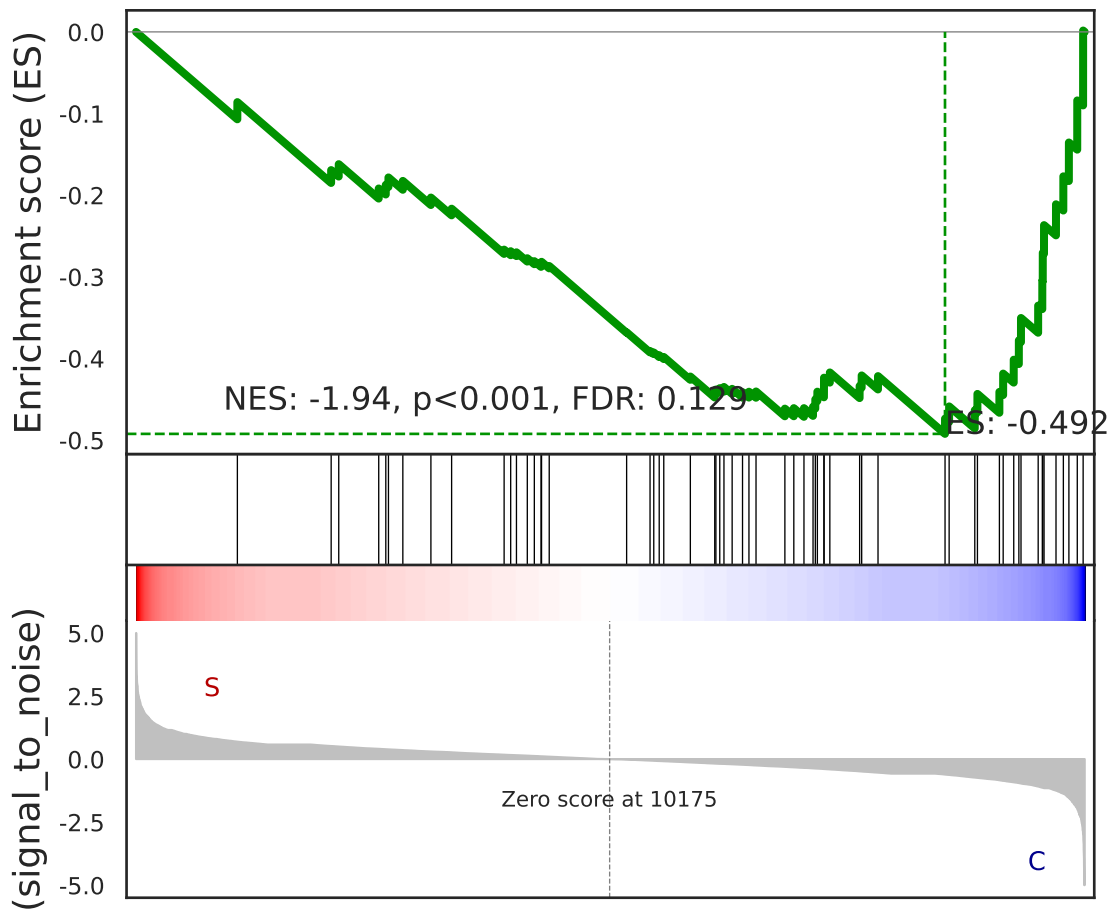

Supplement: Supplementary file 317 [file 1600_post-embryonic development(GO_0009791).gsea.pdf › Source data/1.RNA-Seq source data/2.HUVECs/result/1.6.GSEA/S-vs-C/go/BP/1600_post-embryonic development(GO_0009791).gsea.pdf]

post-embryonic development(GO:0009791)  
Heatmap of the Analyzed GeneSet

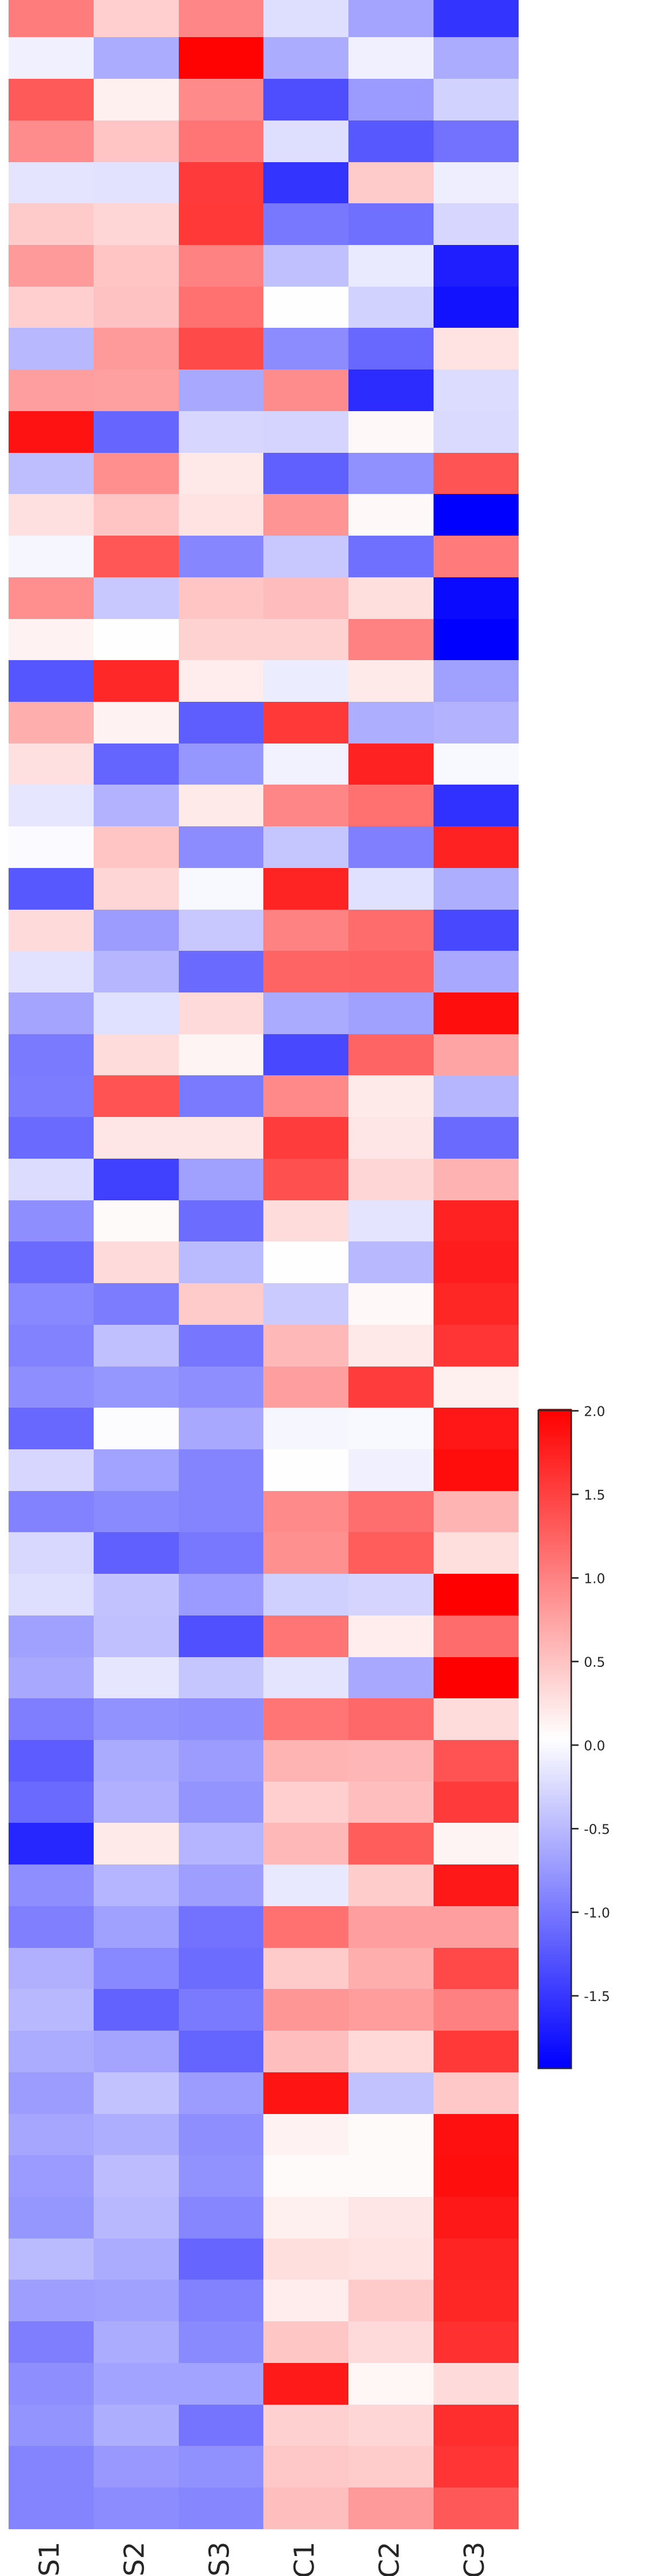

Supplement: Supplementary file 318 [file 1600_post-embryonic development(GO_0009791).heatmap.pdf › Source data/1.RNA-Seq source data/2.HUVECs/result/1.6.GSEA/S-vs-C/go/BP/1600_post-embryonic development(GO_0009791).heatmap.pdf]

# antibacterial humoral response(GO:0019731)

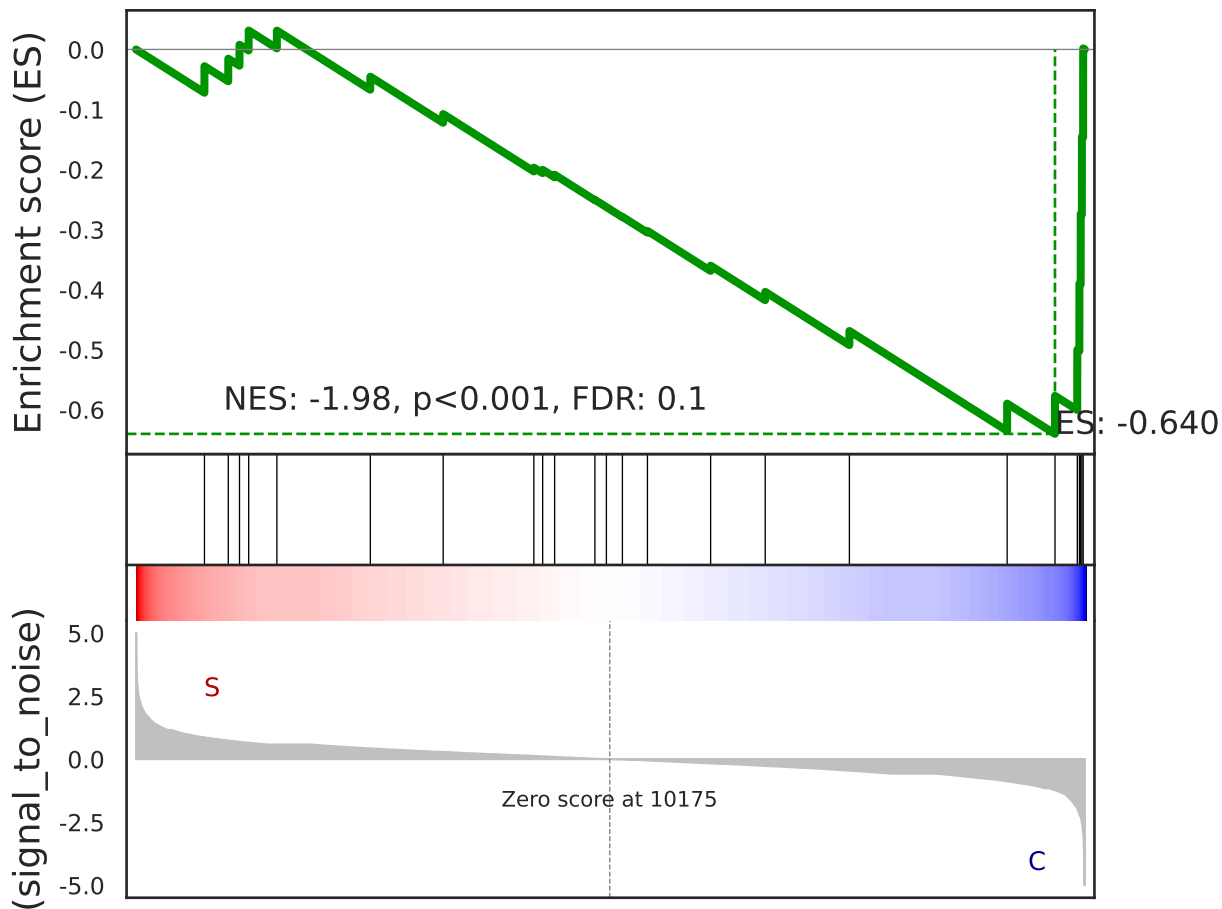

Supplement: Supplementary file 319 [file 1601_antibacterial humoral response(GO_0019731).gsea.pdf › Source data/1.RNA-Seq source data/2.HUVECs/result/1.6.GSEA/S-vs-C/go/BP/1601_antibacterial humoral response(GO_0019731).gsea.pdf]

antibacterial humoral response(GO:0019731)  
Heatmap of the Analyzed GeneSet

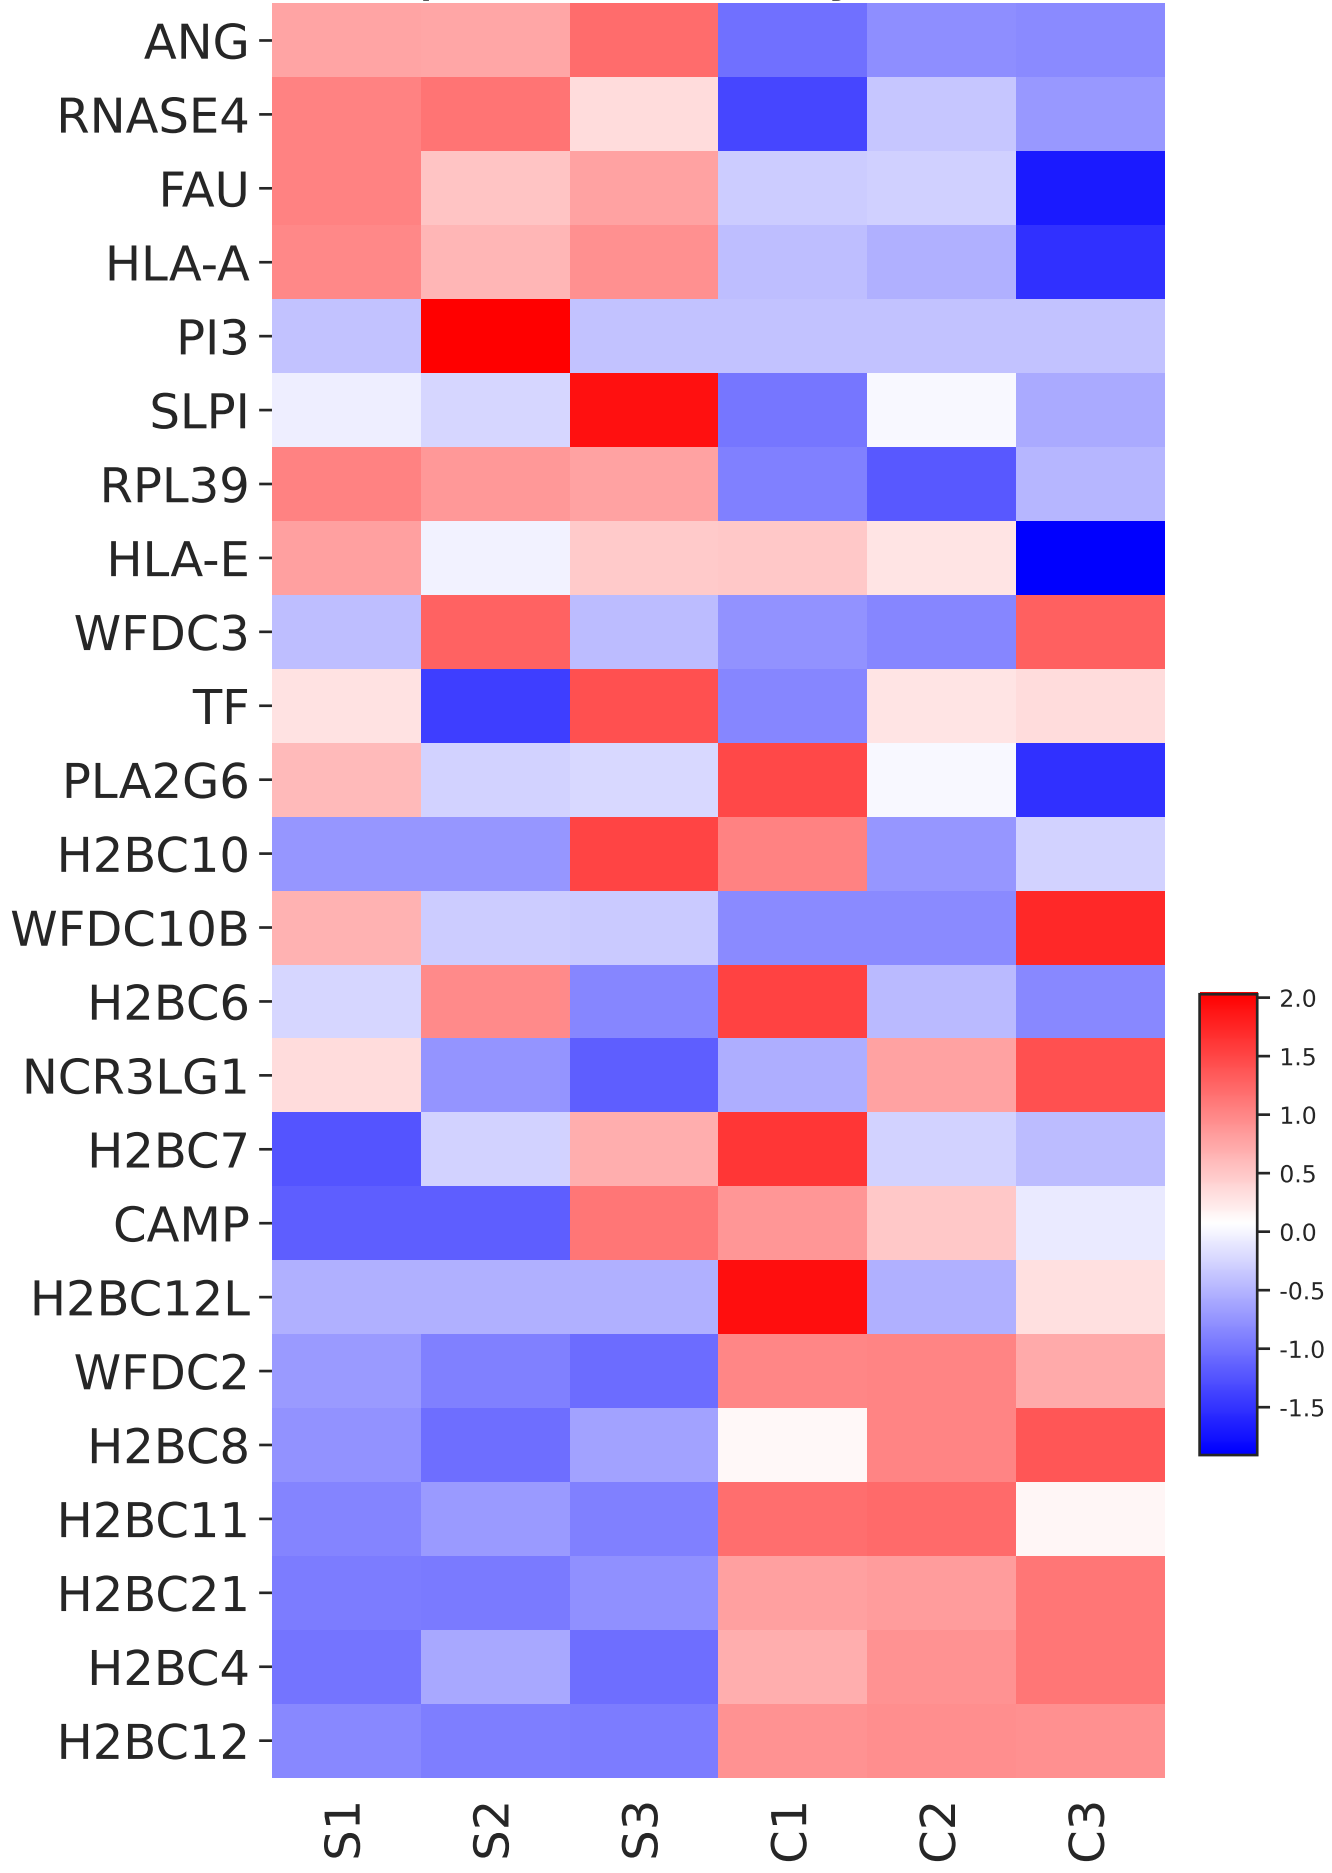

Supplement: Supplementary file 320 [file 1601_antibacterial humoral response(GO_0019731).heatmap.pdf › Source data/1.RNA-Seq source data/2.HUVECs/result/1.6.GSEA/S-vs-C/go/BP/1601_antibacterial humoral response(GO_0019731).heatmap.pdf]

# cholesterol biosynthetic process(GO:0006695)

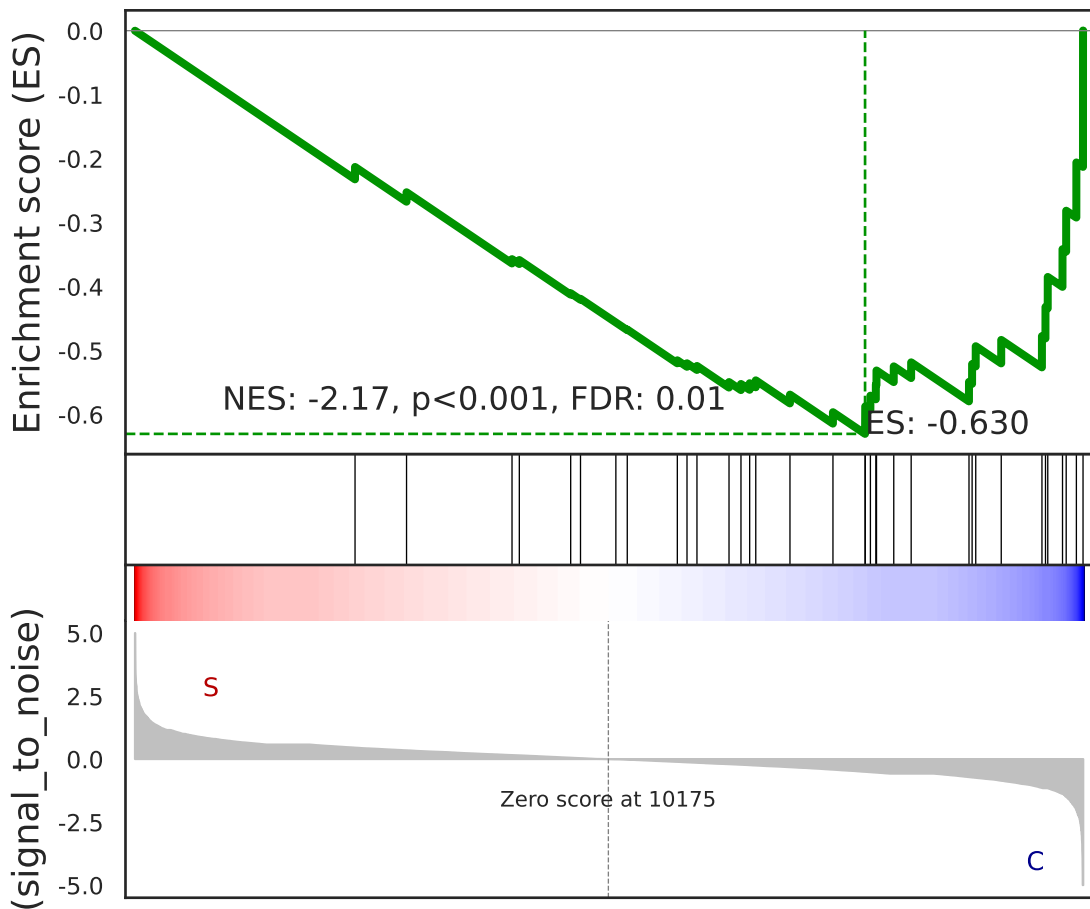

Supplement: Supplementary file 321 [file 1602_cholesterol biosynthetic process(GO_0006695).gsea.pdf › Source data/1.RNA-Seq source data/2.HUVECs/result/1.6.GSEA/S-vs-C/go/BP/1602_cholesterol biosynthetic process(GO_0006695).gsea.pdf]

cholesterol biosynthetic process(GO:0006695)  
Heatmap of the Analyzed GeneSet

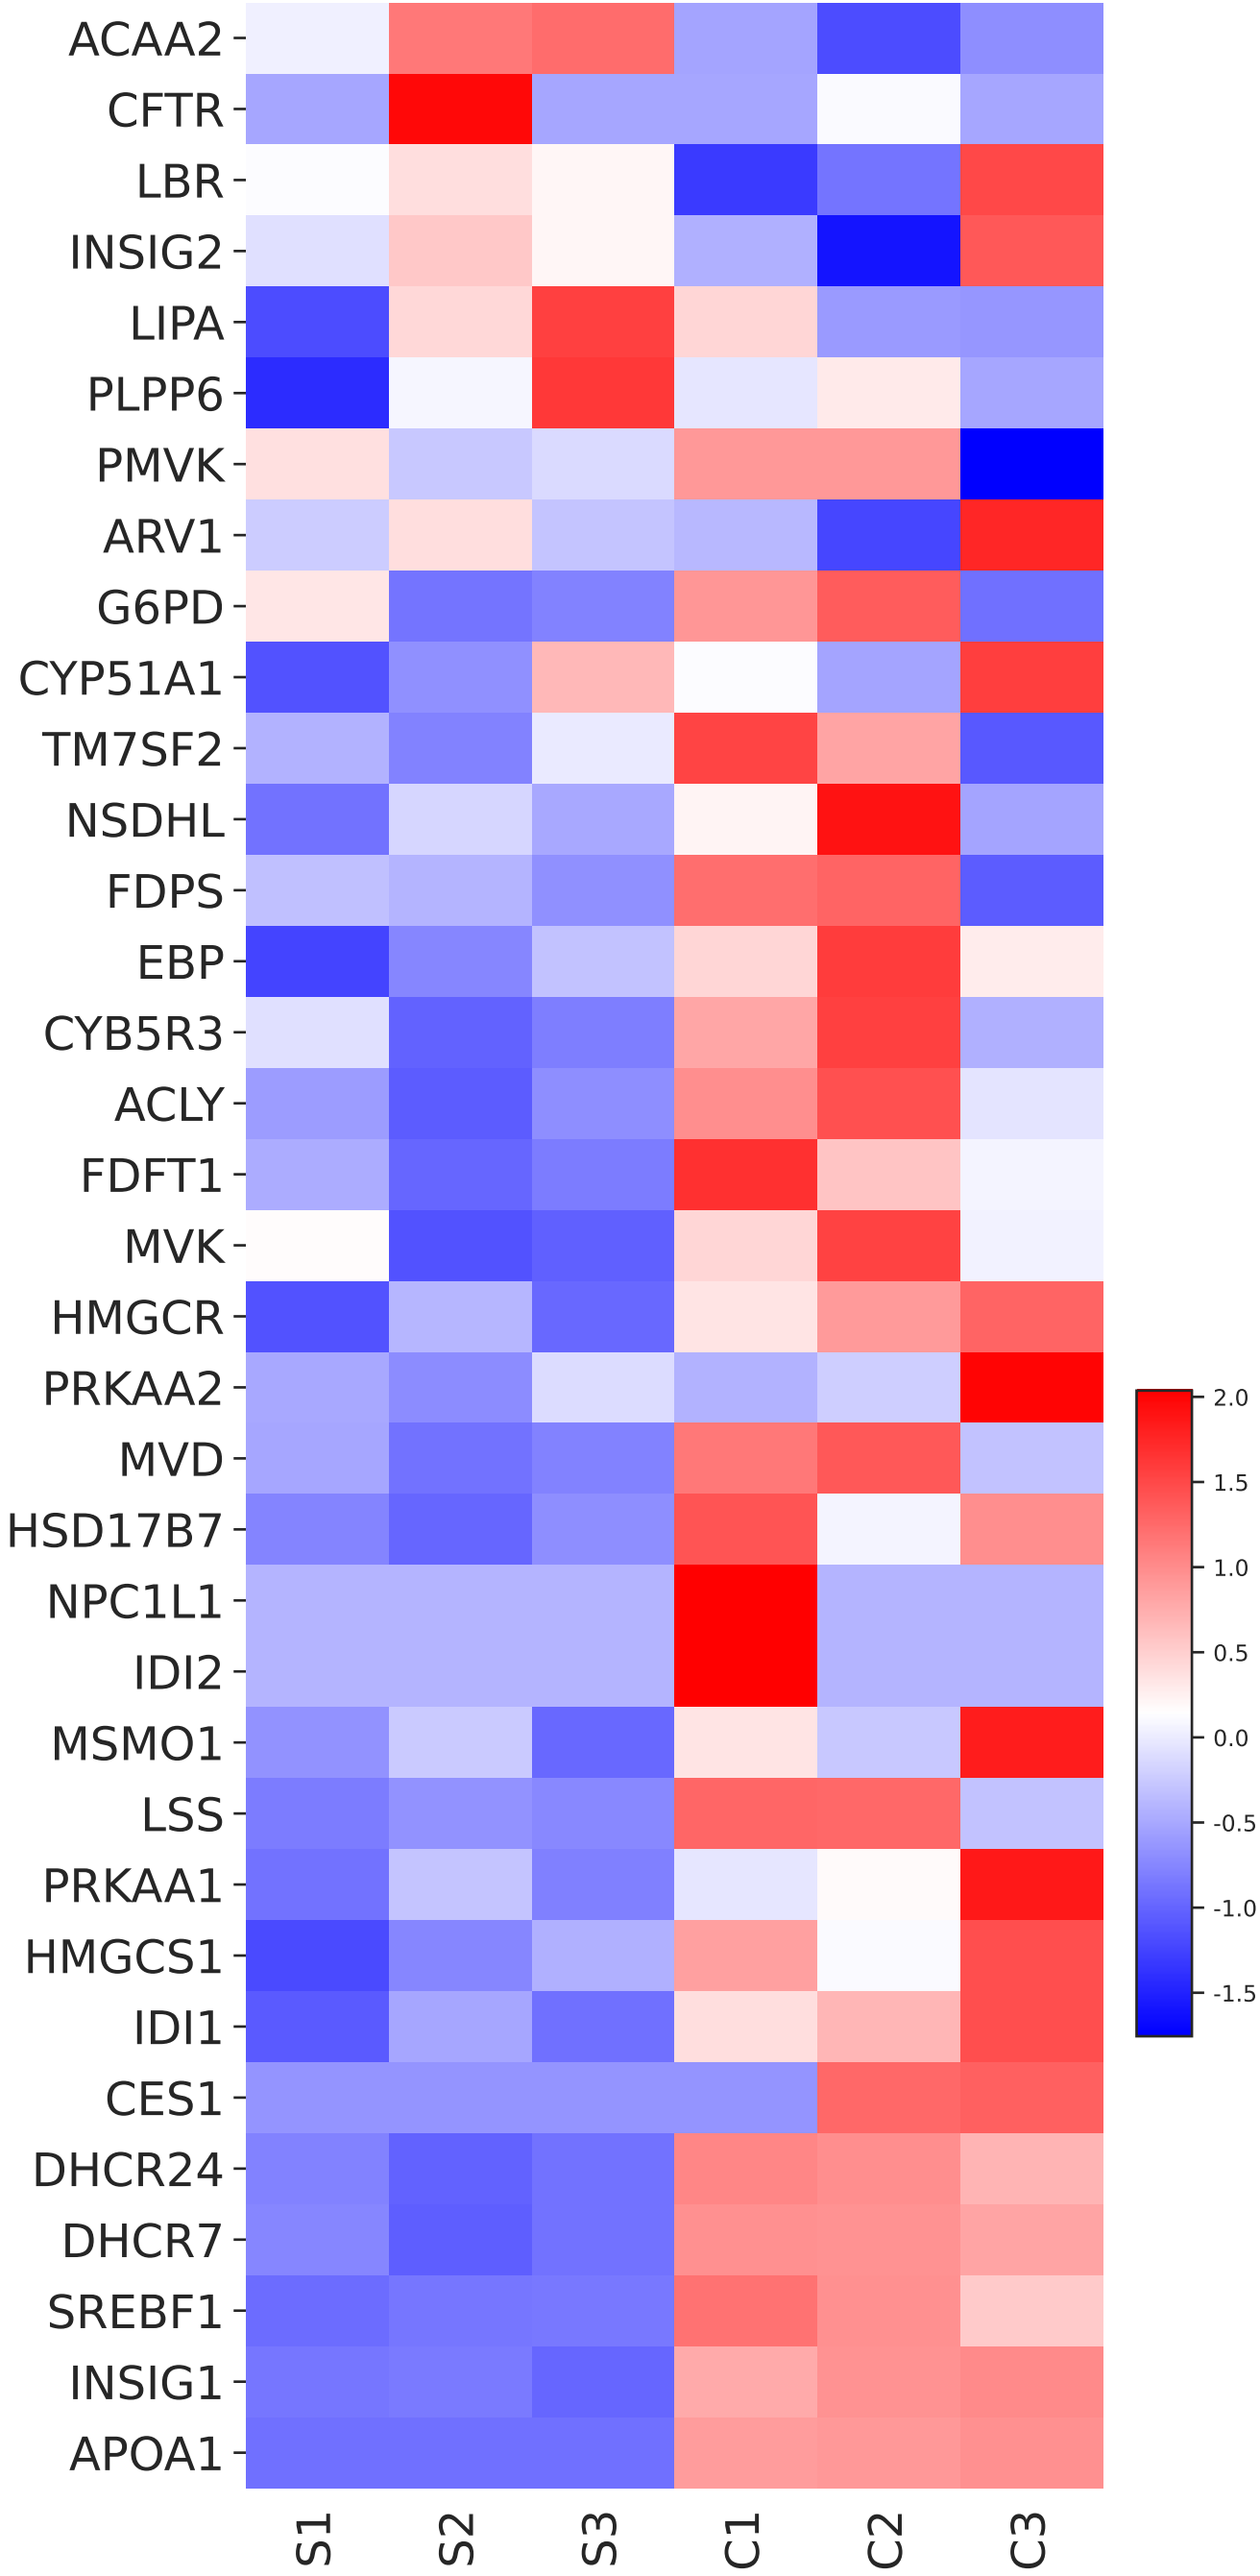

Supplement: Supplementary file 322 [file 1602_cholesterol biosynthetic process(GO_0006695).heatmap.pdf › Source data/1.RNA-Seq source data/2.HUVECs/result/1.6.GSEA/S-vs-C/go/BP/1602_cholesterol biosynthetic process(GO_0006695).heatmap.pdf]

# cytoplasmic translation(GO:0002181)

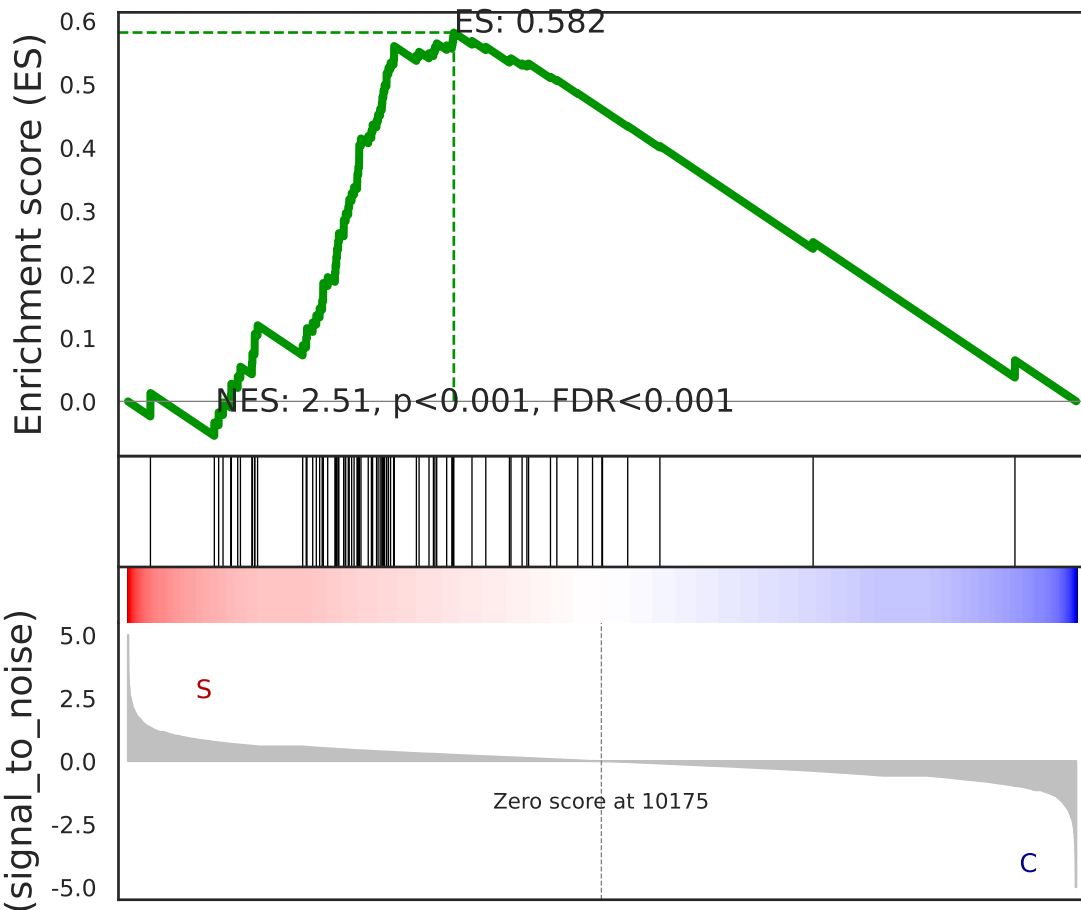

Supplement: Supplementary file 323 [file 1_cytoplasmic translation(GO_0002181).gsea.pdf › Source data/1.RNA-Seq source data/2.HUVECs/result/1.6.GSEA/S-vs-C/go/BP/1_cytoplasmic translation(GO_0002181).gsea.pdf]

cytoplasmic translation(GO:0002181)  
Heatmap of the Analyzed GeneSet

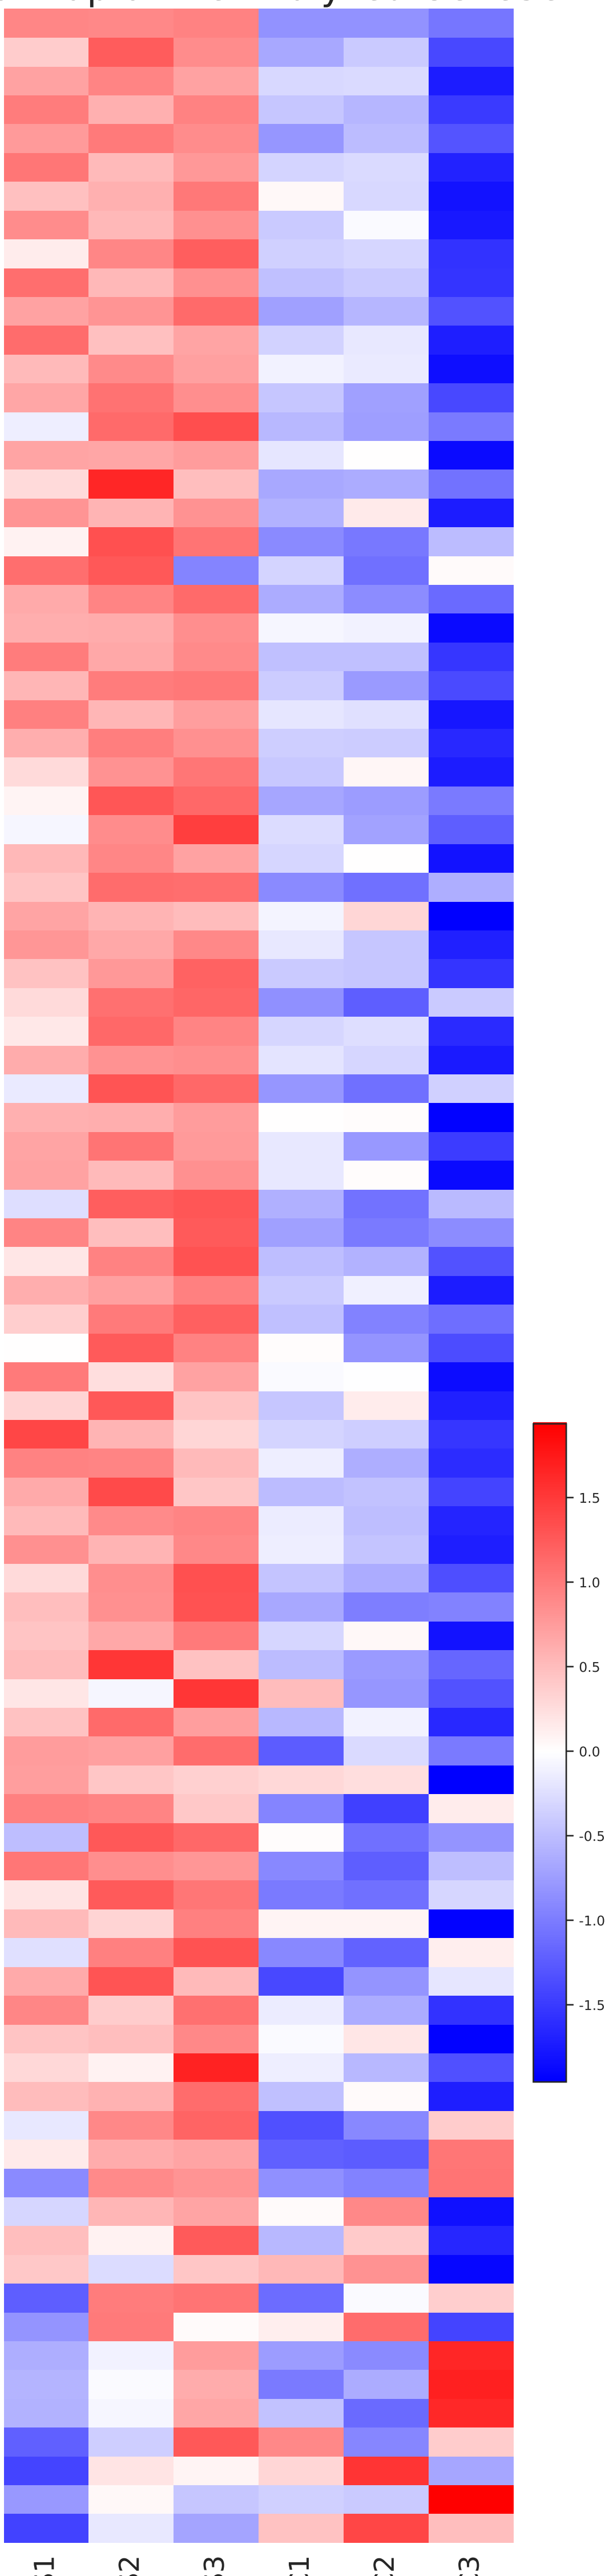

Supplement: Supplementary file 324 [file 1_cytoplasmic translation(GO_0002181).heatmap.pdf › Source data/1.RNA-Seq source data/2.HUVECs/result/1.6.GSEA/S-vs-C/go/BP/1_cytoplasmic translation(GO_0002181).heatmap.pdf]

**intrinsic apoptotic signaling pathway in response to endo...(GO:0070059)**

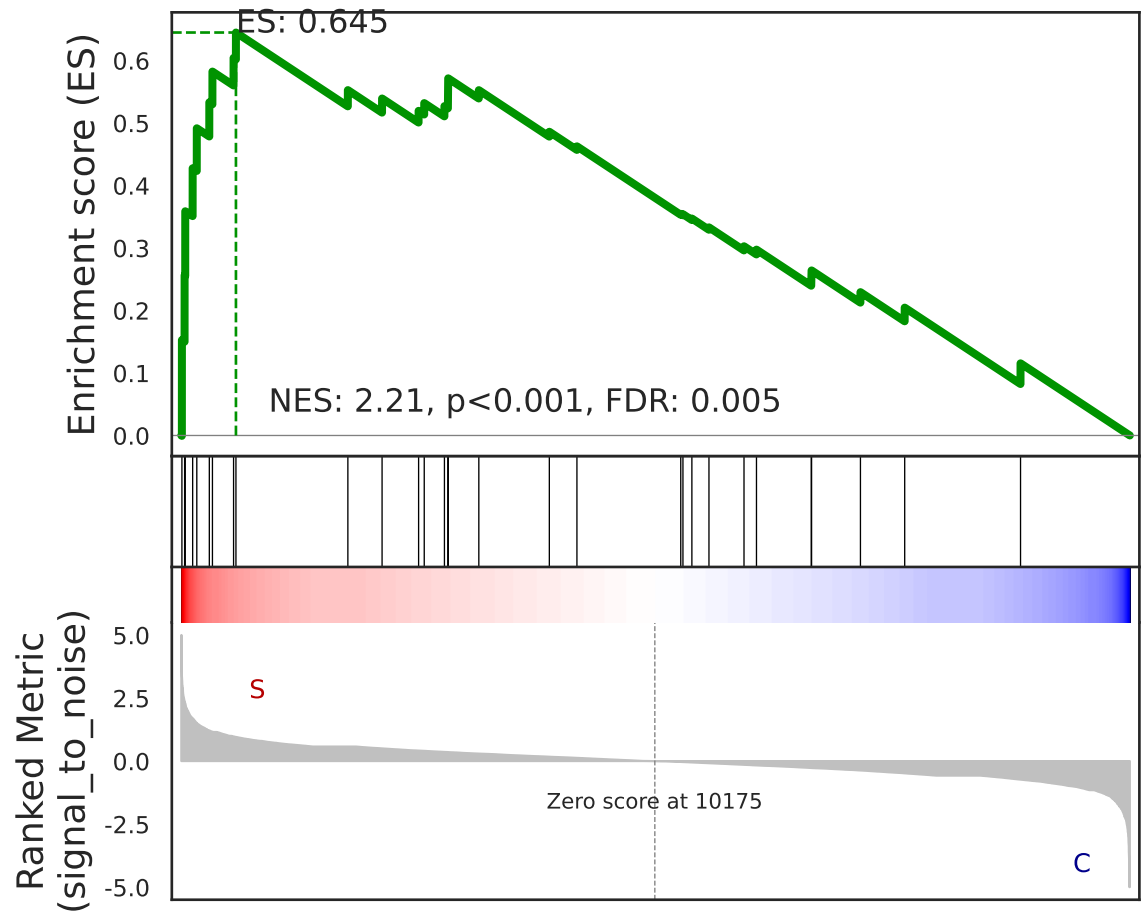

Supplement: Supplementary file 325 [file 2_intrinsic apoptotic signaling pathway in response to endo...(GO_0070059).gsea.pdf › Source data/1.RNA-Seq source data/2.HUVECs/result/1.6.GSEA/S-vs-C/go/BP/2_intrinsic apoptotic signaling pathway in response to endo...(GO_0070059).gsea.pdf]

Heatmap of the Analyzed GeneSet

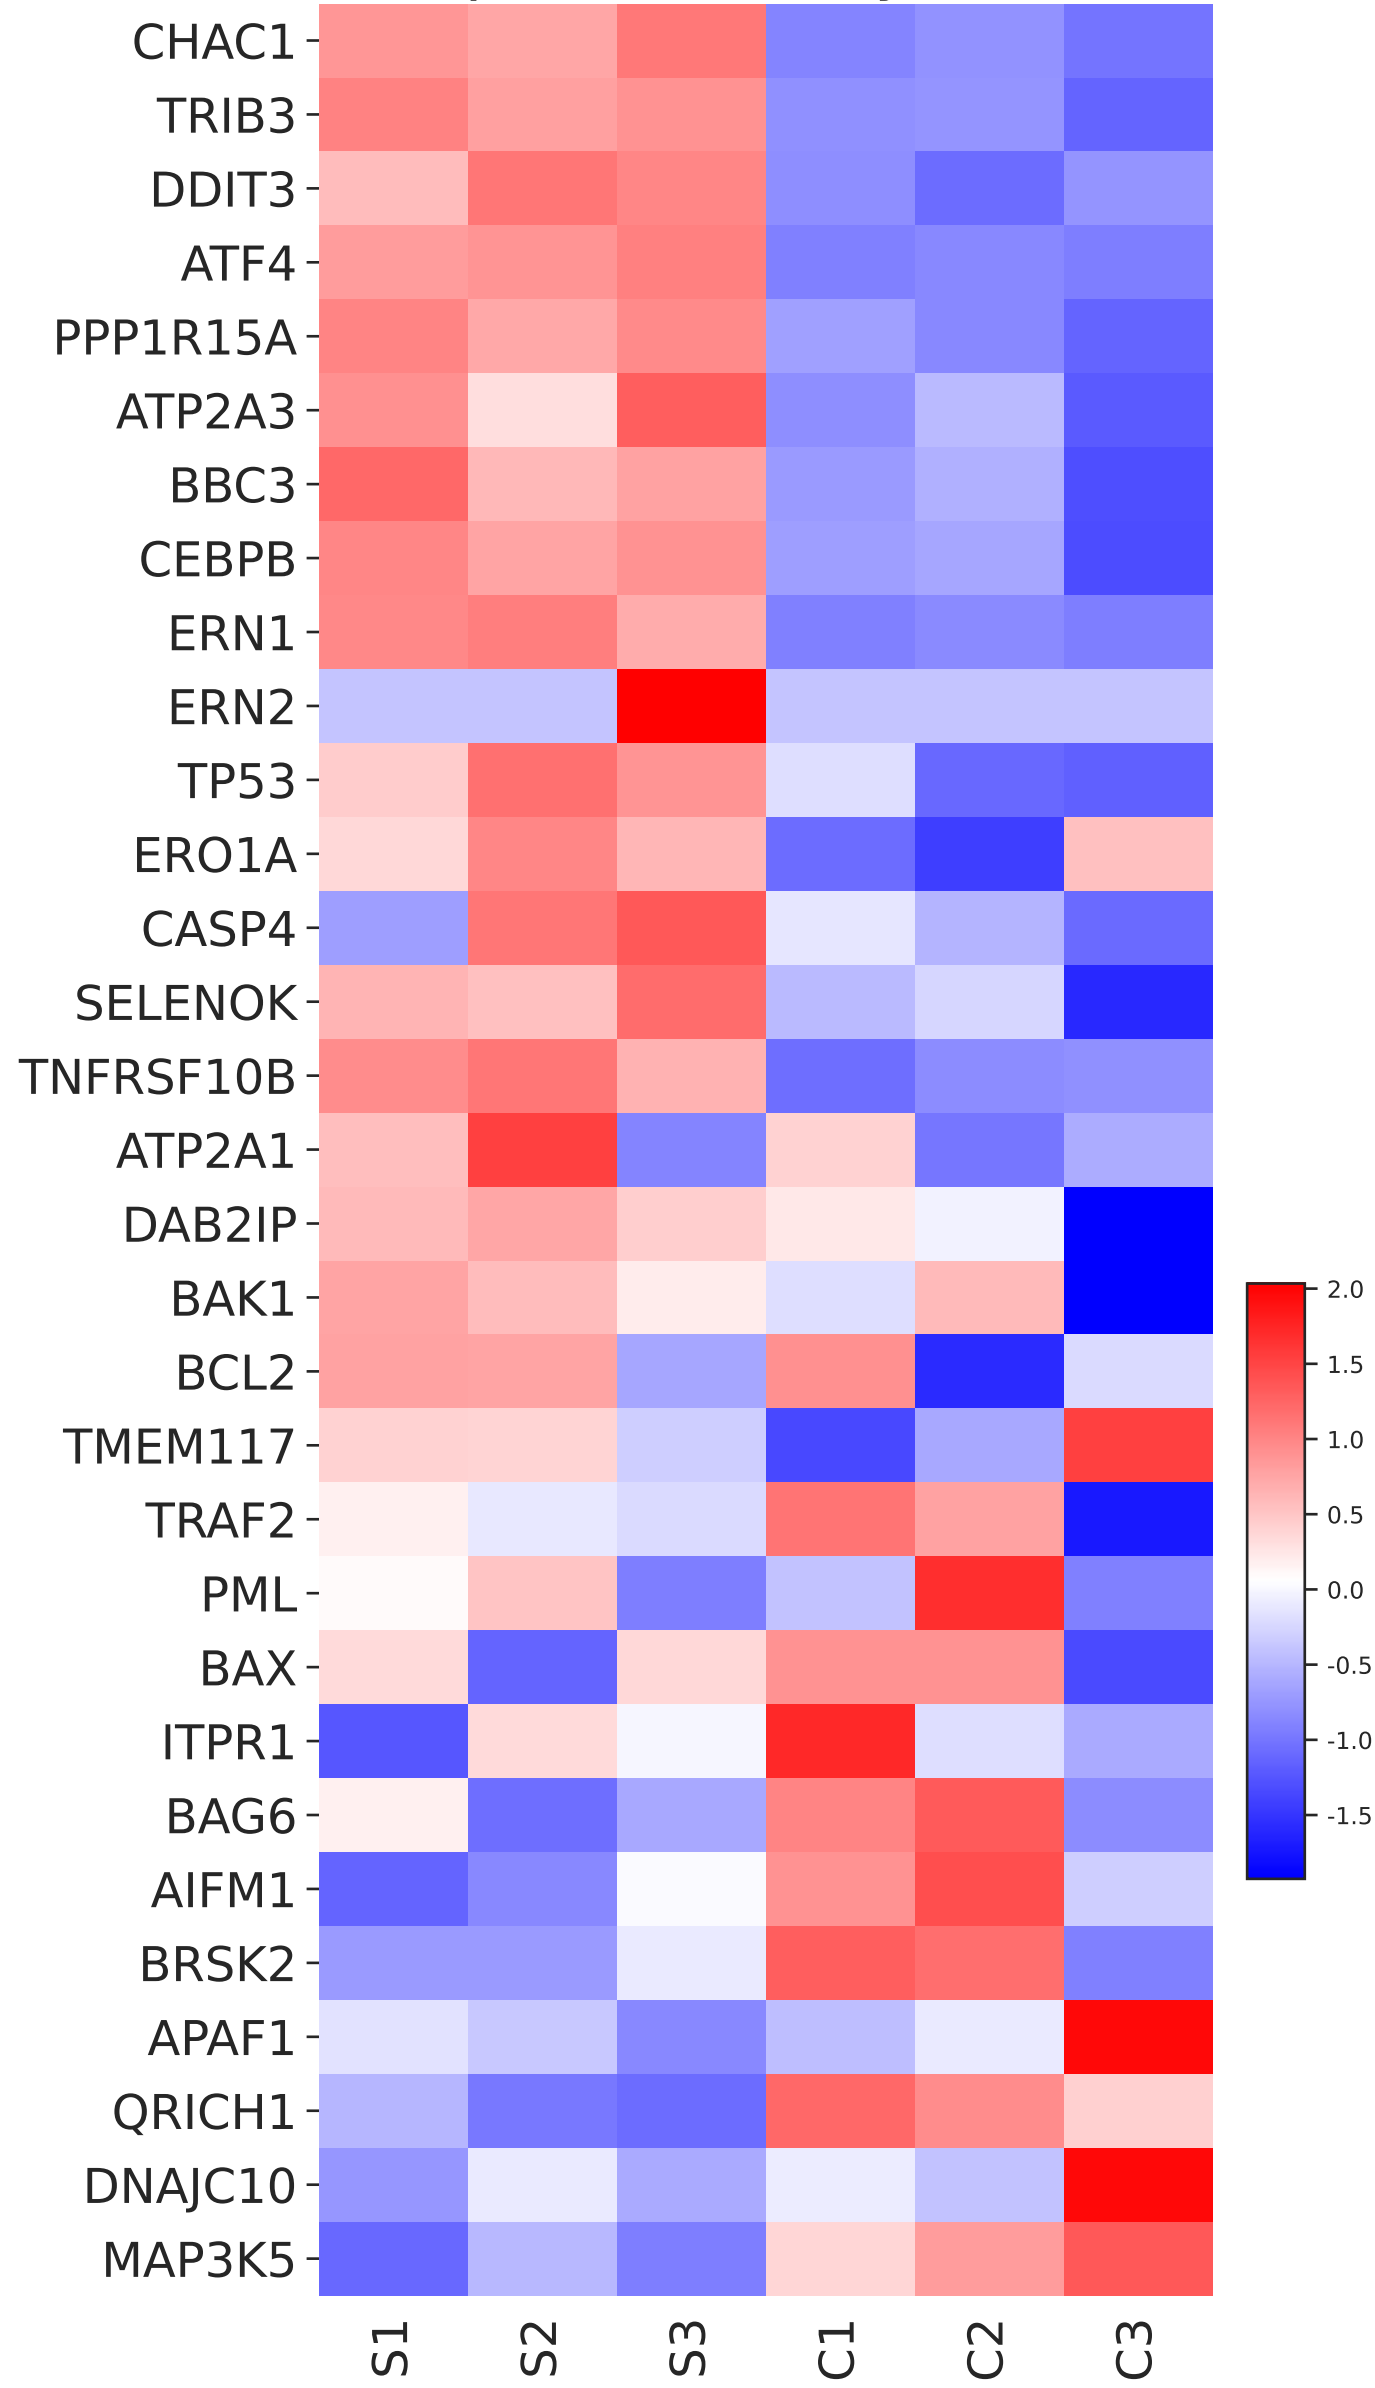

Supplement: Supplementary file 326 [file 2_intrinsic apoptotic signaling pathway in response to endo...(GO_0070059).heatmap.pdf › Source data/1.RNA-Seq source data/2.HUVECs/result/1.6.GSEA/S-vs-C/go/BP/2_intrinsic apoptotic signaling pathway in response to endo...(GO_0070059).heatmap.pdf]

# brown fat cell differentiation(GO:0050873)

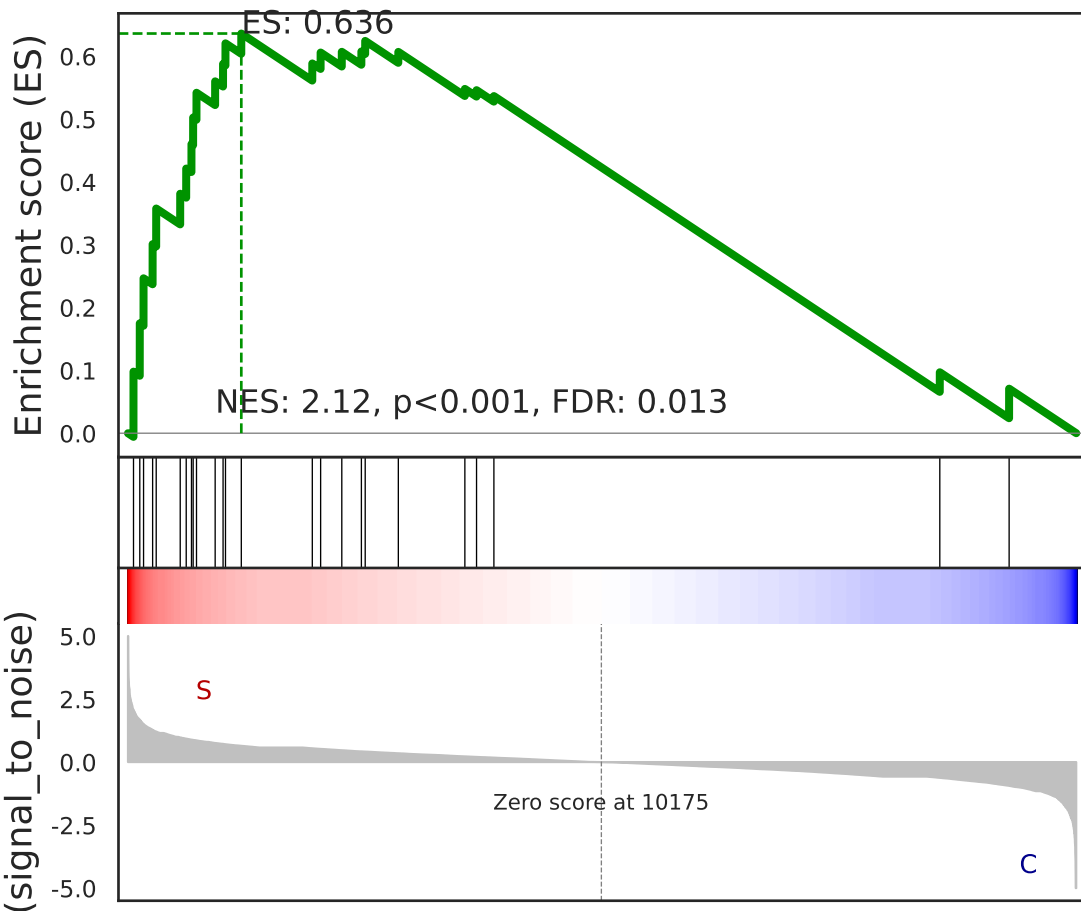

Supplement: Supplementary file 327 [file 3_brown fat cell differentiation(GO_0050873).gsea.pdf › Source data/1.RNA-Seq source data/2.HUVECs/result/1.6.GSEA/S-vs-C/go/BP/3_brown fat cell differentiation(GO_0050873).gsea.pdf]

brown fat cell differentiation(GO:0050873)  
Heatmap of the Analyzed GeneSet

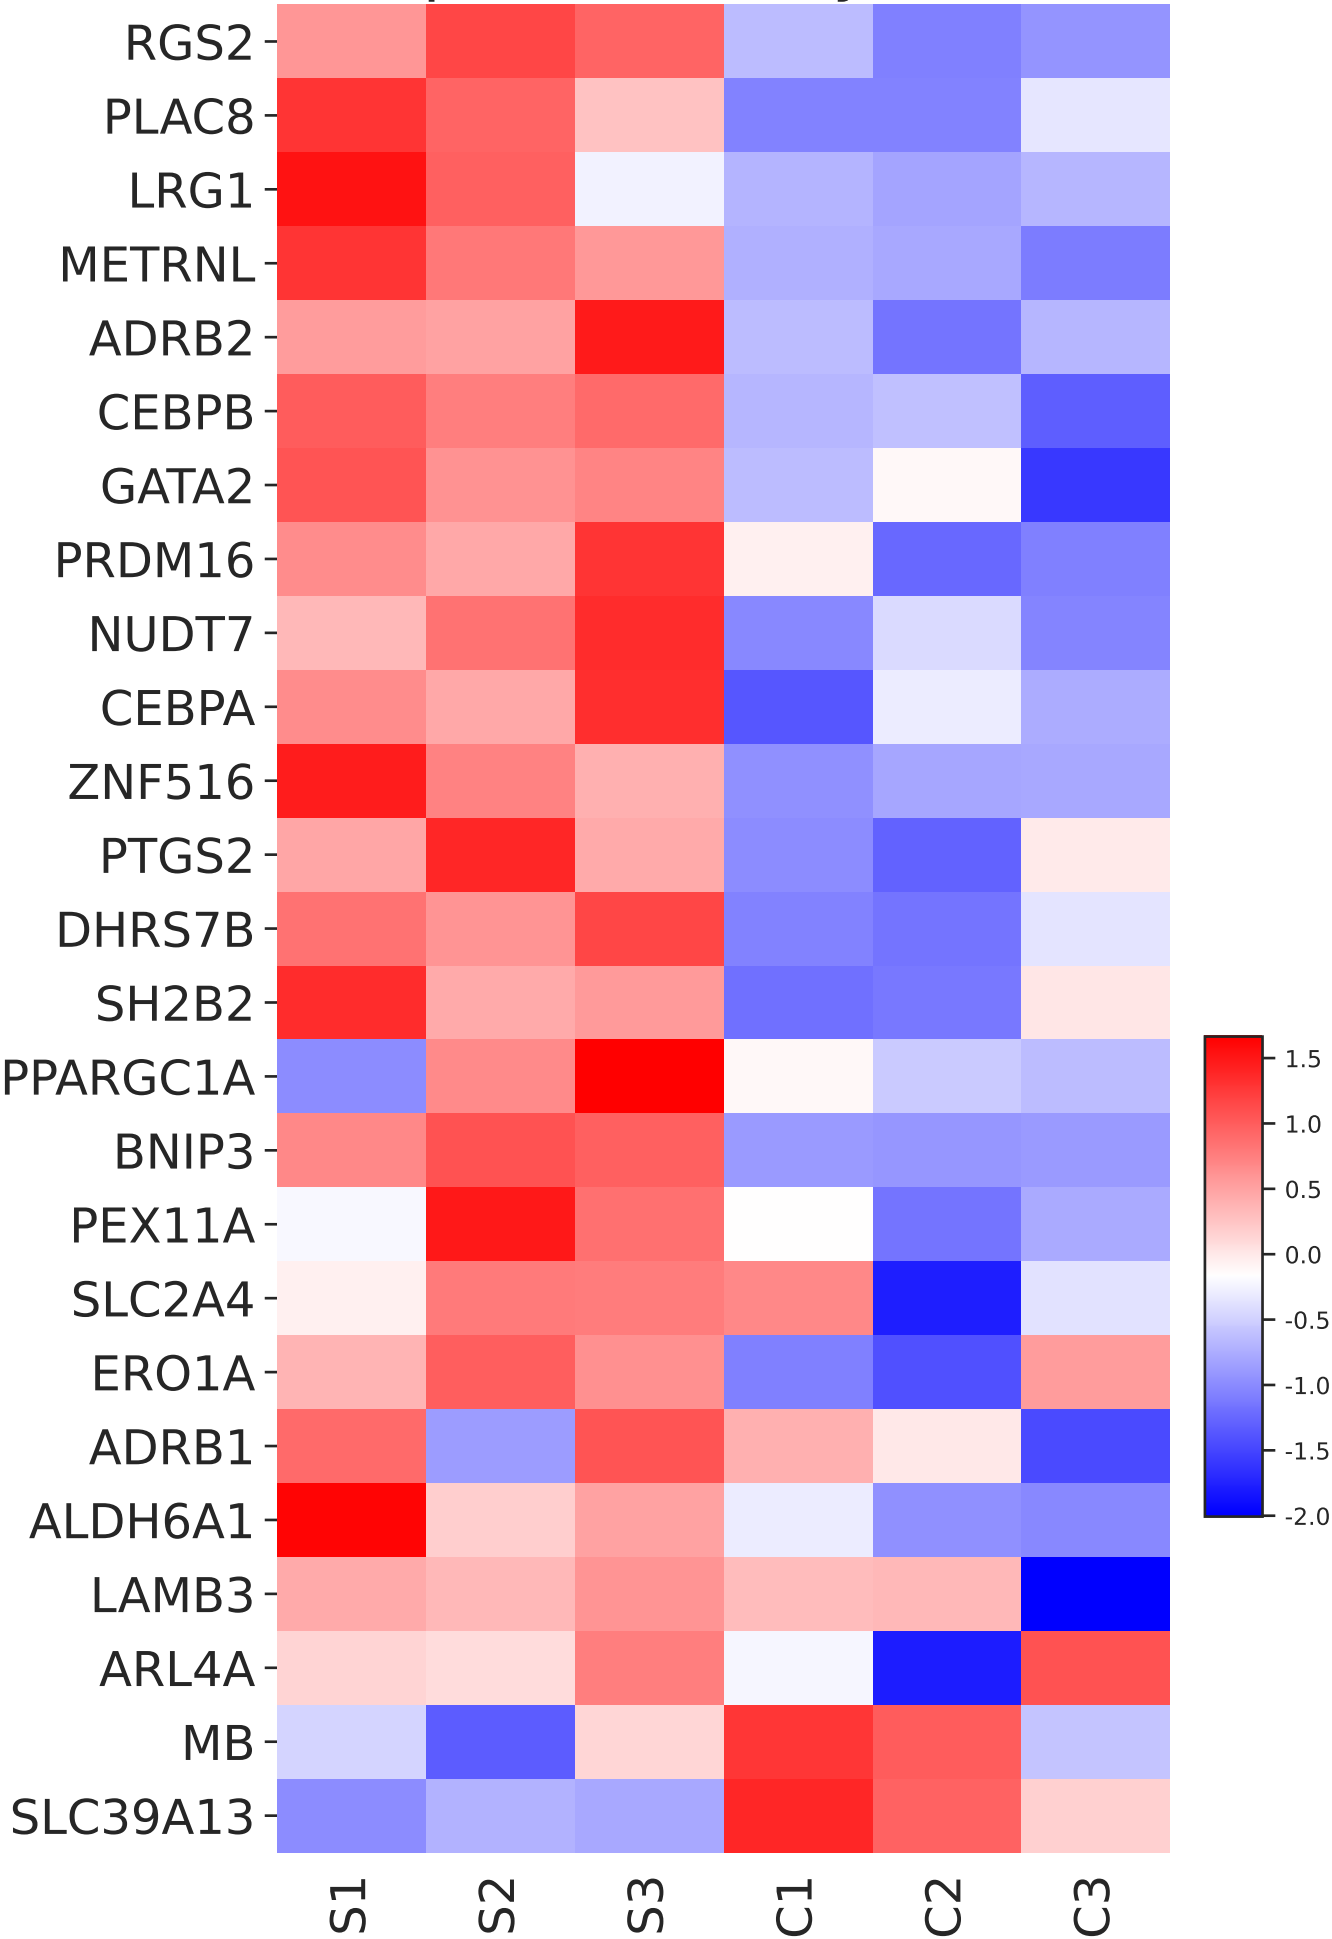

Supplement: Supplementary file 328 [file 3_brown fat cell differentiation(GO_0050873).heatmap.pdf › Source data/1.RNA-Seq source data/2.HUVECs/result/1.6.GSEA/S-vs-C/go/BP/3_brown fat cell differentiation(GO_0050873).heatmap.pdf]

# negative regulation of blood pressure(GO:0045776)

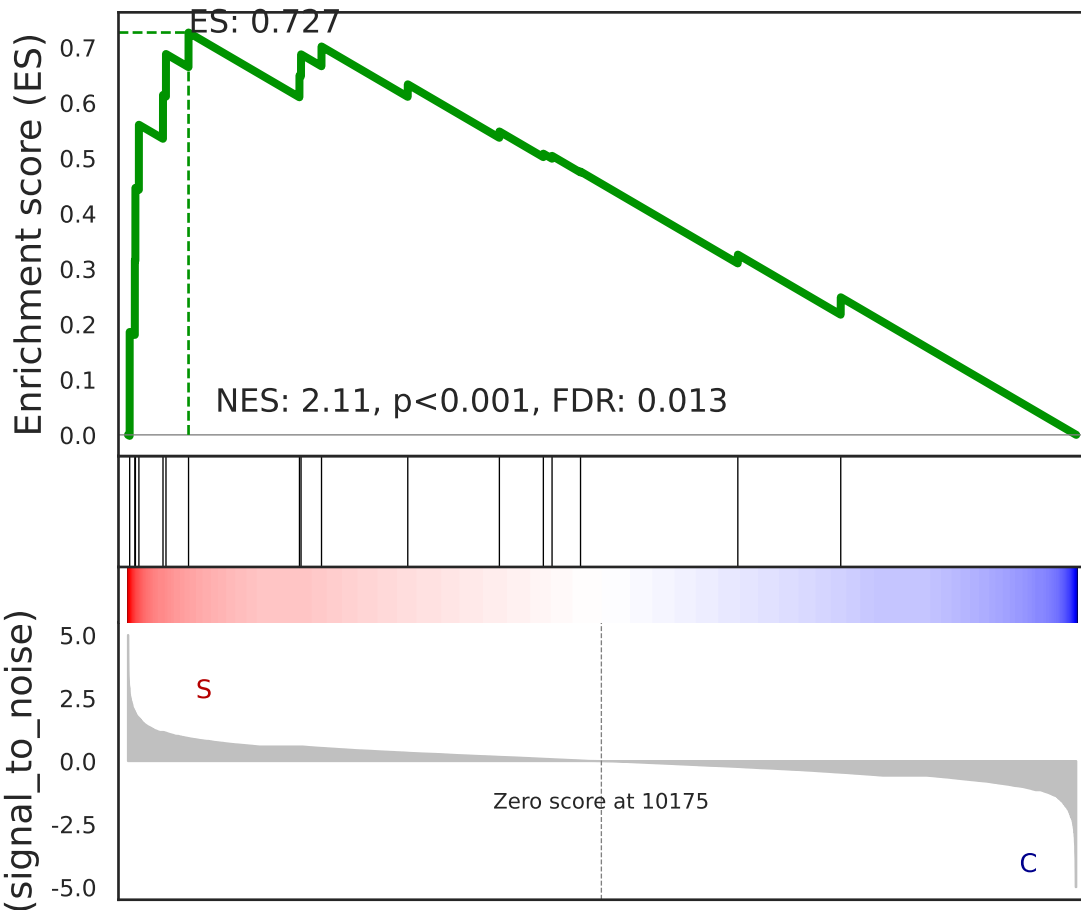

Supplement: Supplementary file 329 [file 4_negative regulation of blood pressure(GO_0045776).gsea.pdf › Source data/1.RNA-Seq source data/2.HUVECs/result/1.6.GSEA/S-vs-C/go/BP/4_negative regulation of blood pressure(GO_0045776).gsea.pdf]

negative regulation of blood pressure(GO:0045776)

Heatmap of the Analyzed GeneSet

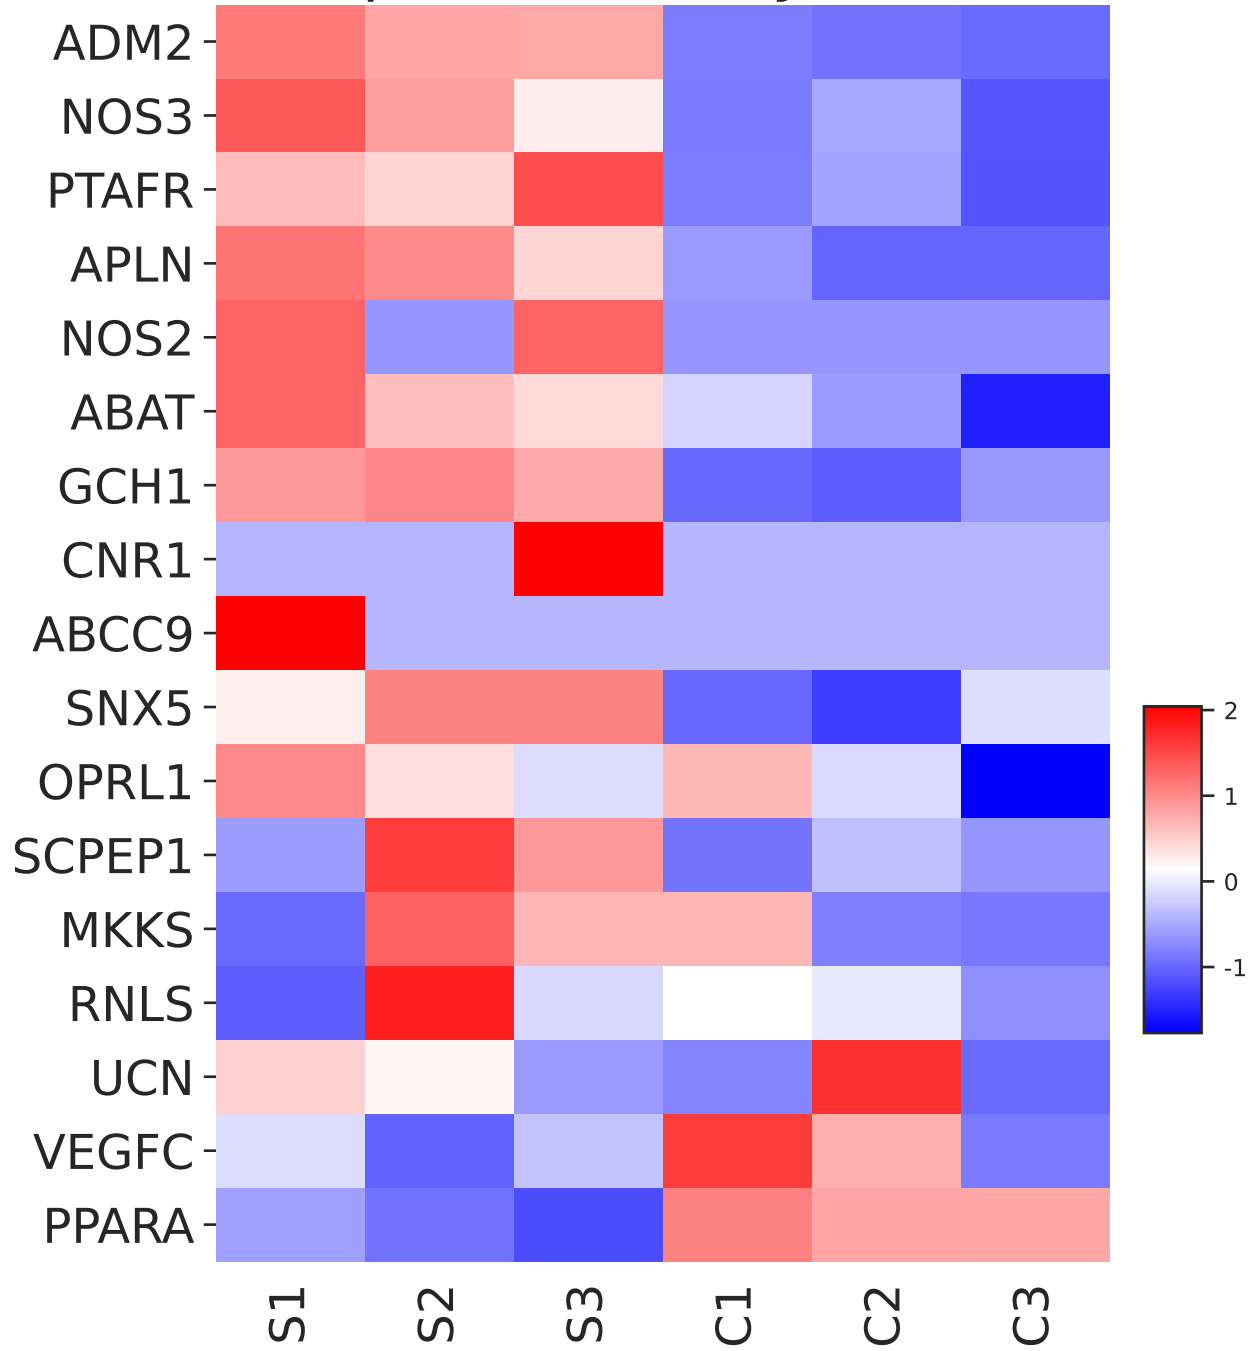

Supplement: Supplementary file 330 [file 4_negative regulation of blood pressure(GO_0045776).heatmap.pdf › Source data/1.RNA-Seq source data/2.HUVECs/result/1.6.GSEA/S-vs-C/go/BP/4_negative regulation of blood pressure(GO_0045776).heatmap.pdf]

# ribosomal large subunit biogenesis(GO:0042273)

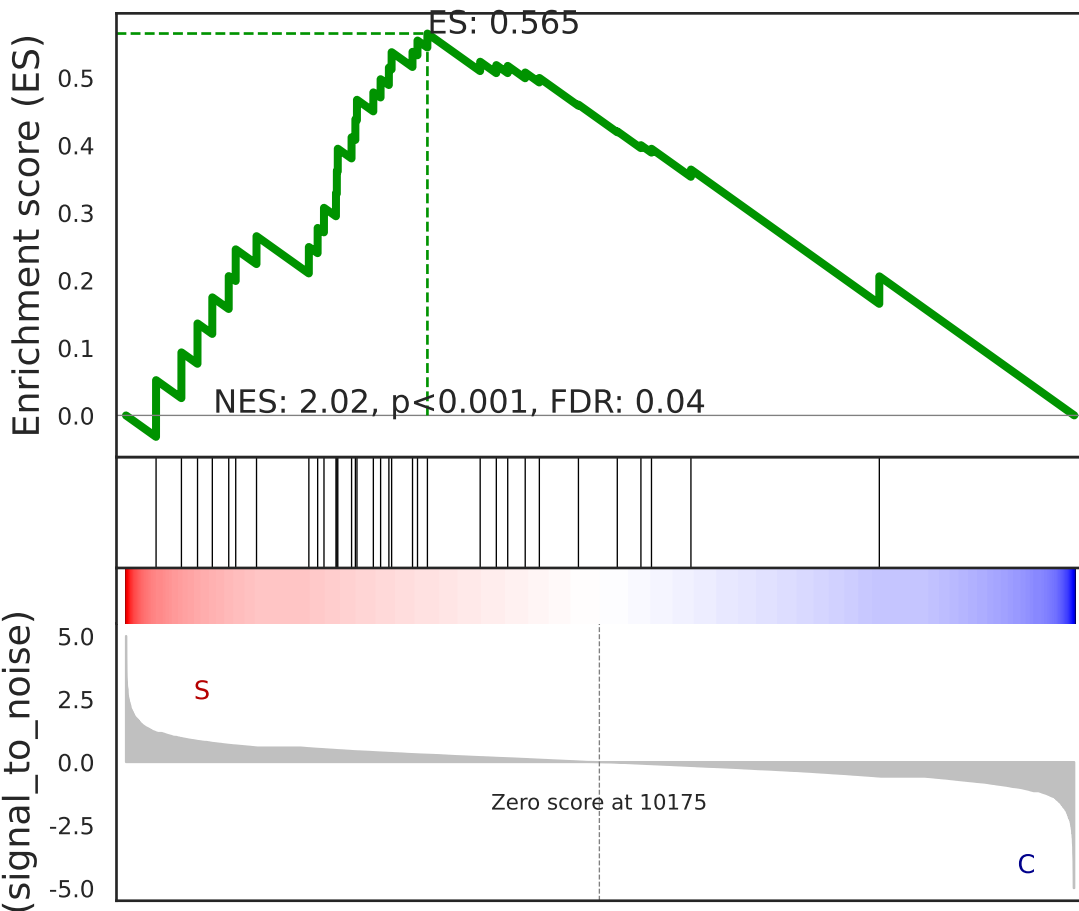

Supplement: Supplementary file 331 [file 5_ribosomal large subunit biogenesis(GO_0042273).gsea.pdf › Source data/1.RNA-Seq source data/2.HUVECs/result/1.6.GSEA/S-vs-C/go/BP/5_ribosomal large subunit biogenesis(GO_0042273).gsea.pdf]

ribosomal large subunit biogenesis(GO:0042273)  
Heatmap of the Analyzed GeneSet

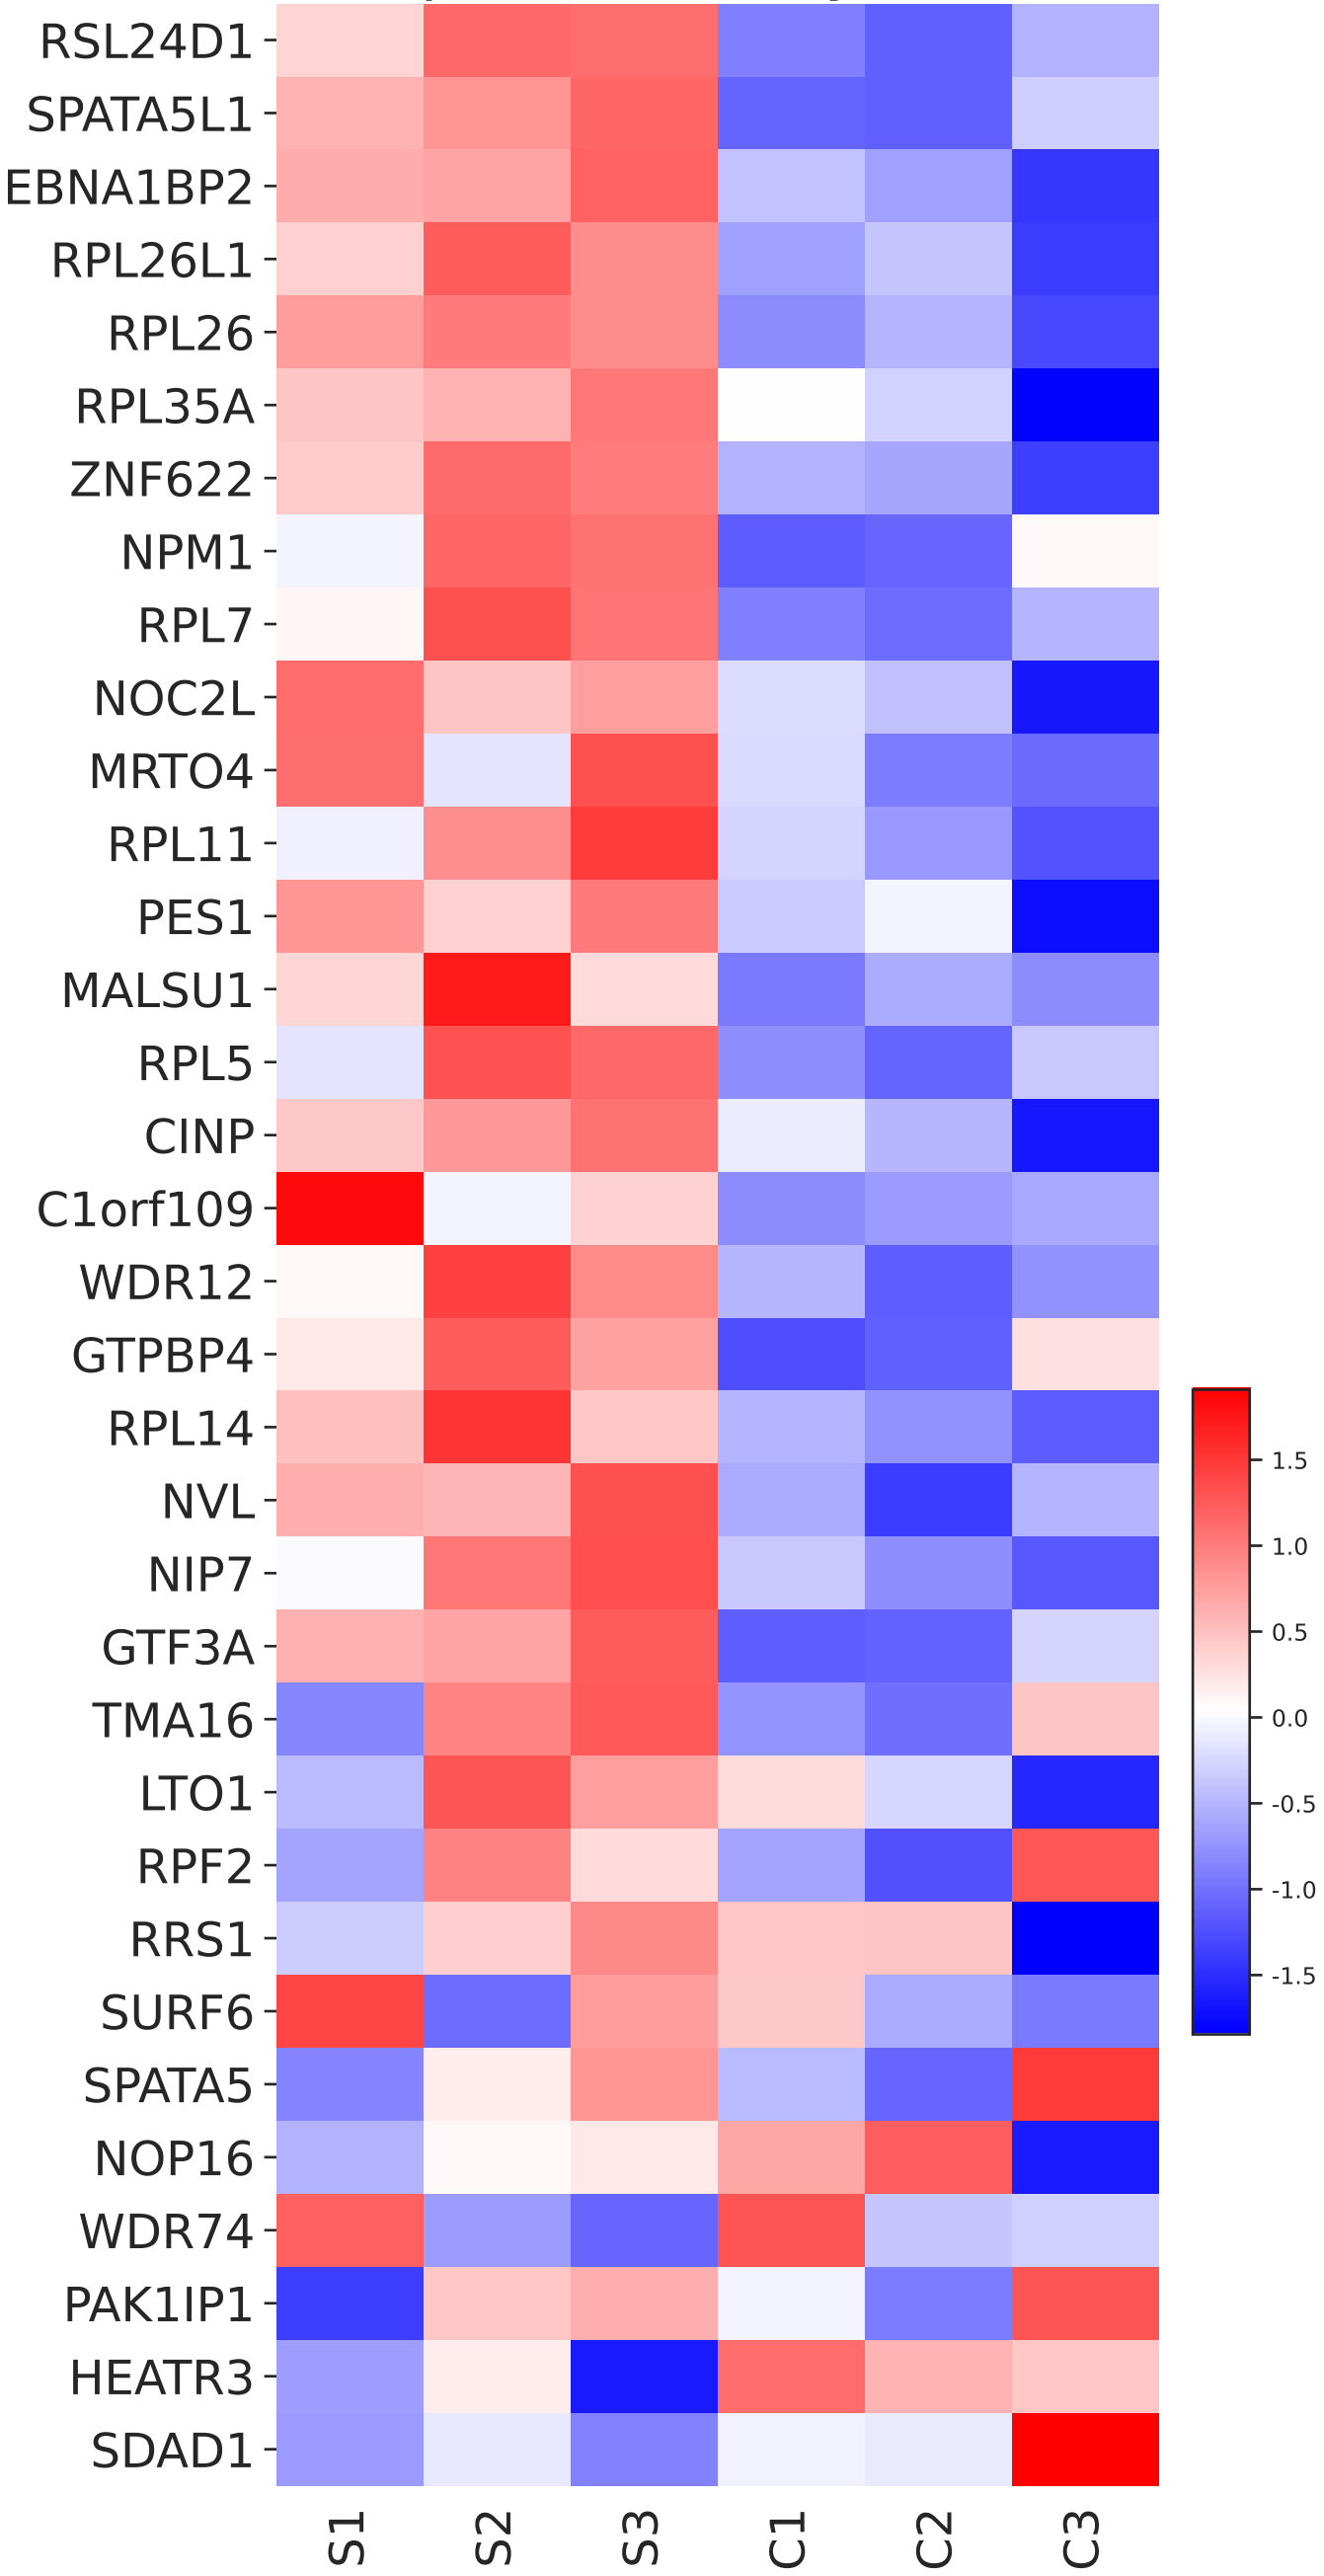

Supplement: Supplementary file 332 [file 5_ribosomal large subunit biogenesis(GO_0042273).heatmap.pdf › Source data/1.RNA-Seq source data/2.HUVECs/result/1.6.GSEA/S-vs-C/go/BP/5_ribosomal large subunit biogenesis(GO_0042273).heatmap.pdf]

# cellular response to glucose starvation(GO:0042149)

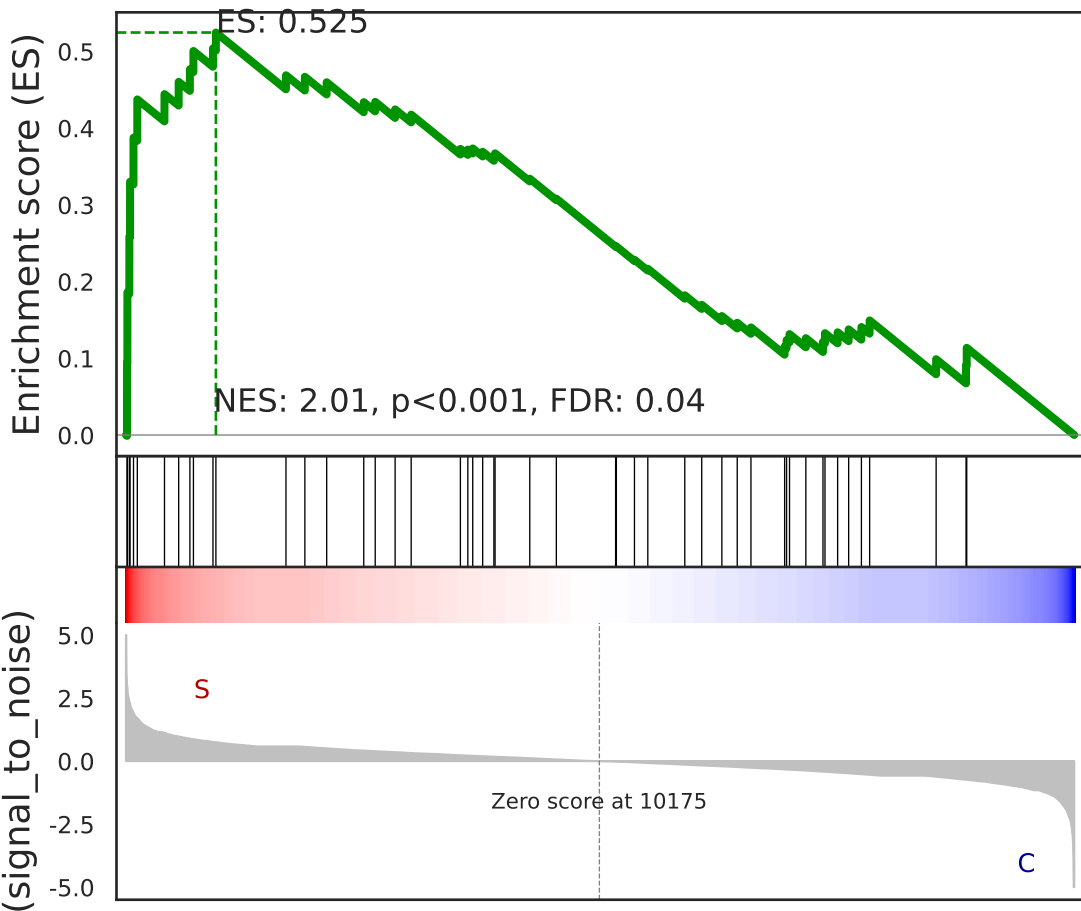

Supplement: Supplementary file 333 [file 6_cellular response to glucose starvation(GO_0042149).gsea.pdf › Source data/1.RNA-Seq source data/2.HUVECs/result/1.6.GSEA/S-vs-C/go/BP/6_cellular response to glucose starvation(GO_0042149).gsea.pdf]

cellular response to glucose starvation(GO:0042149)

Heatmap of the Analyzed GeneSet

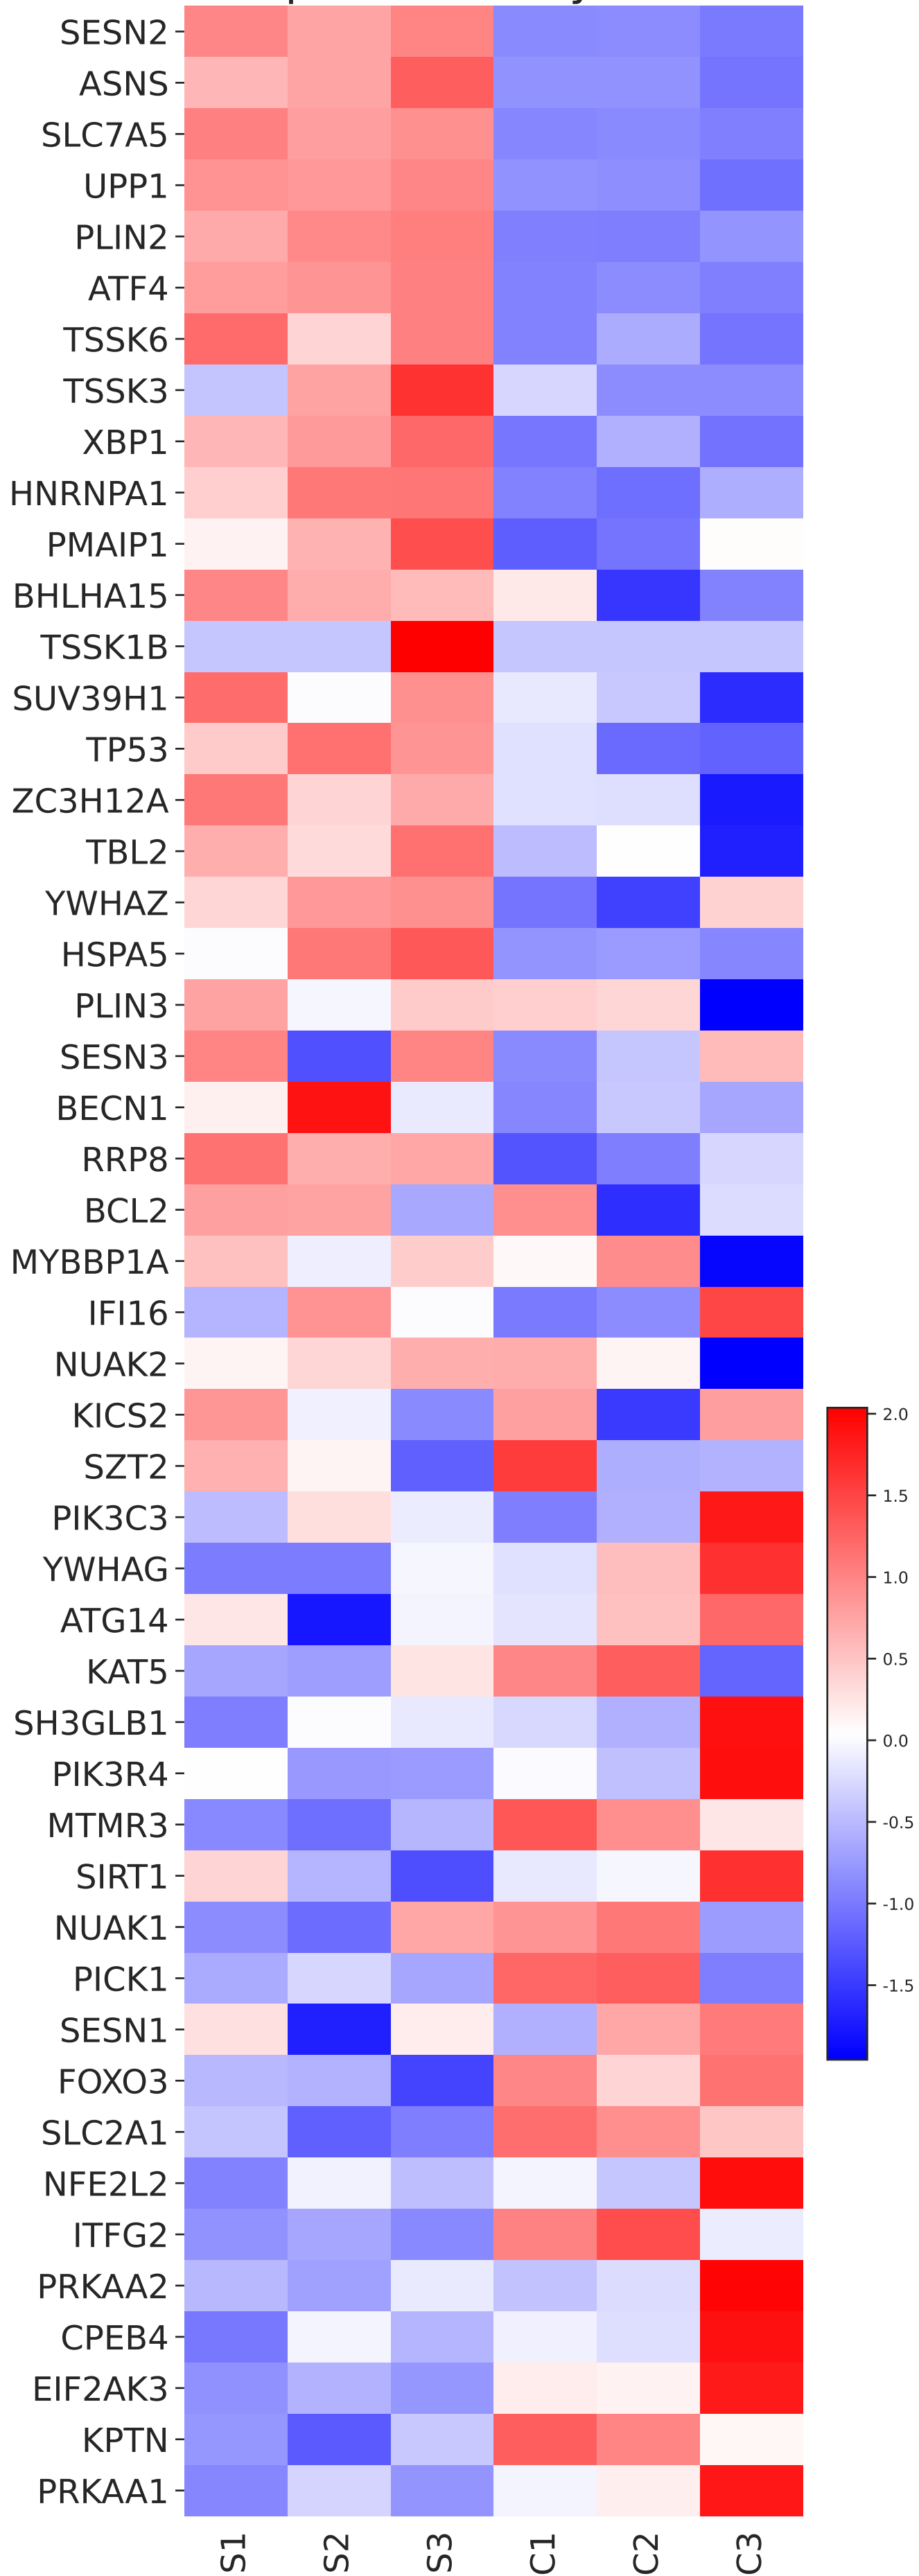

Supplement: Supplementary file 334 [file 6_cellular response to glucose starvation(GO_0042149).heatmap.pdf › Source data/1.RNA-Seq source data/2.HUVECs/result/1.6.GSEA/S-vs-C/go/BP/6_cellular response to glucose starvation(GO_0042149).heatmap.pdf]

# mitotic cell cycle phase transition(GO:0044772)

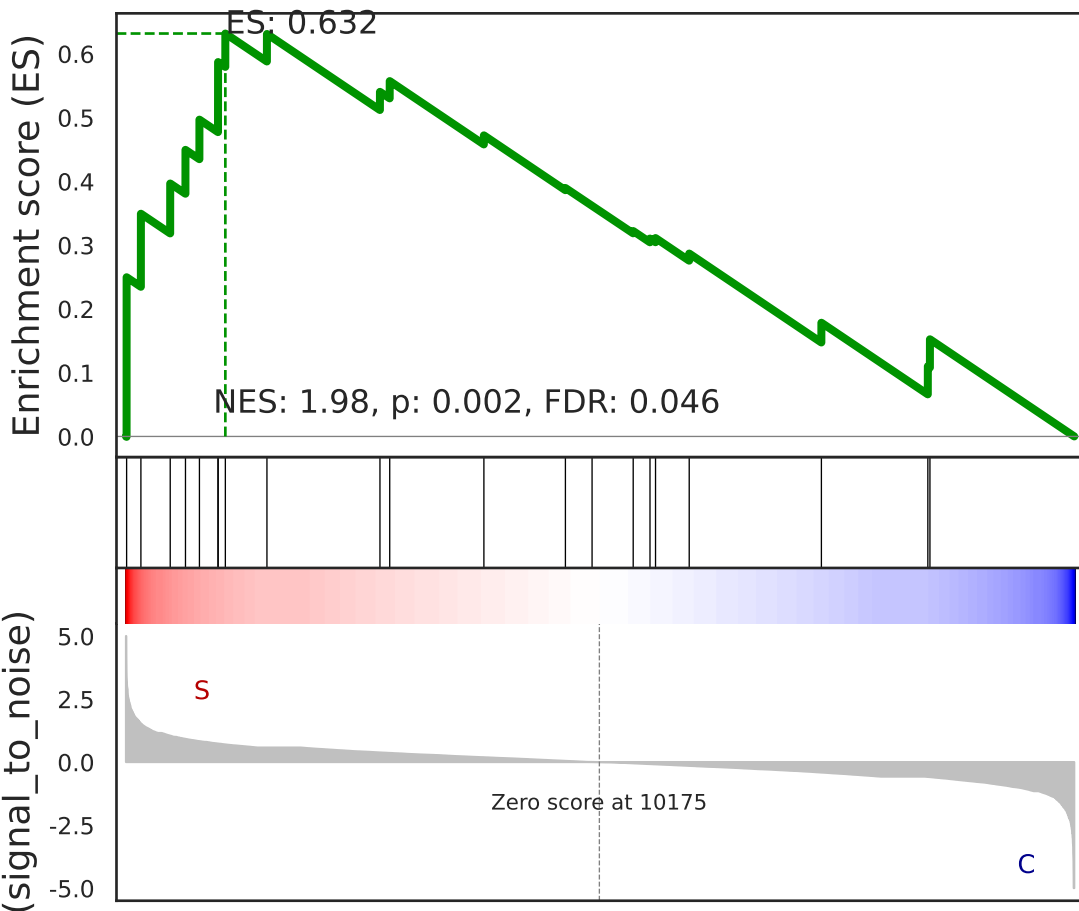

Supplement: Supplementary file 335 [file 7_mitotic cell cycle phase transition(GO_0044772).gsea.pdf › Source data/1.RNA-Seq source data/2.HUVECs/result/1.6.GSEA/S-vs-C/go/BP/7_mitotic cell cycle phase transition(GO_0044772).gsea.pdf]

mitotic cell cycle phase transition(GO:0044772)

Heatmap of the Analyzed GeneSet

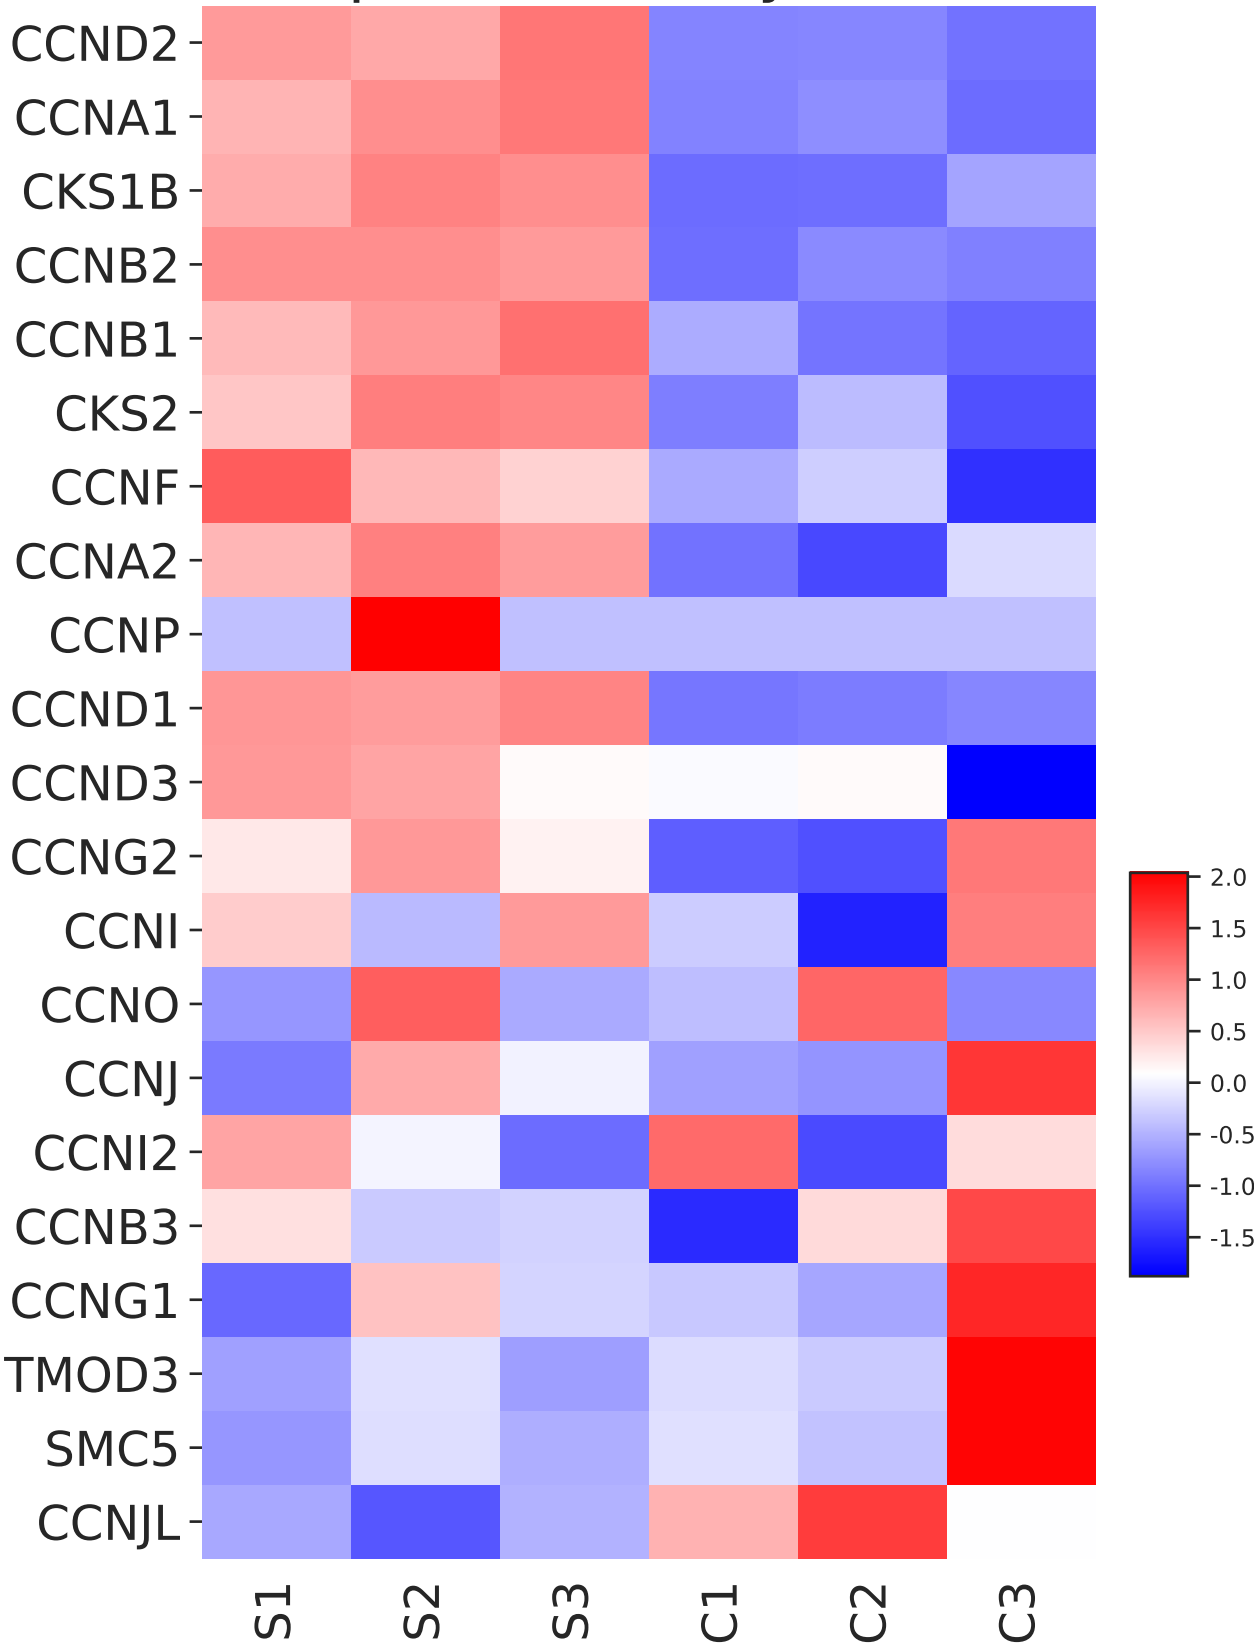

Supplement: Supplementary file 336 [file 7_mitotic cell cycle phase transition(GO_0044772).heatmap.pdf › Source data/1.RNA-Seq source data/2.HUVECs/result/1.6.GSEA/S-vs-C/go/BP/7_mitotic cell cycle phase transition(GO_0044772).heatmap.pdf]

# positive regulation of DNA binding(GO:0043388)

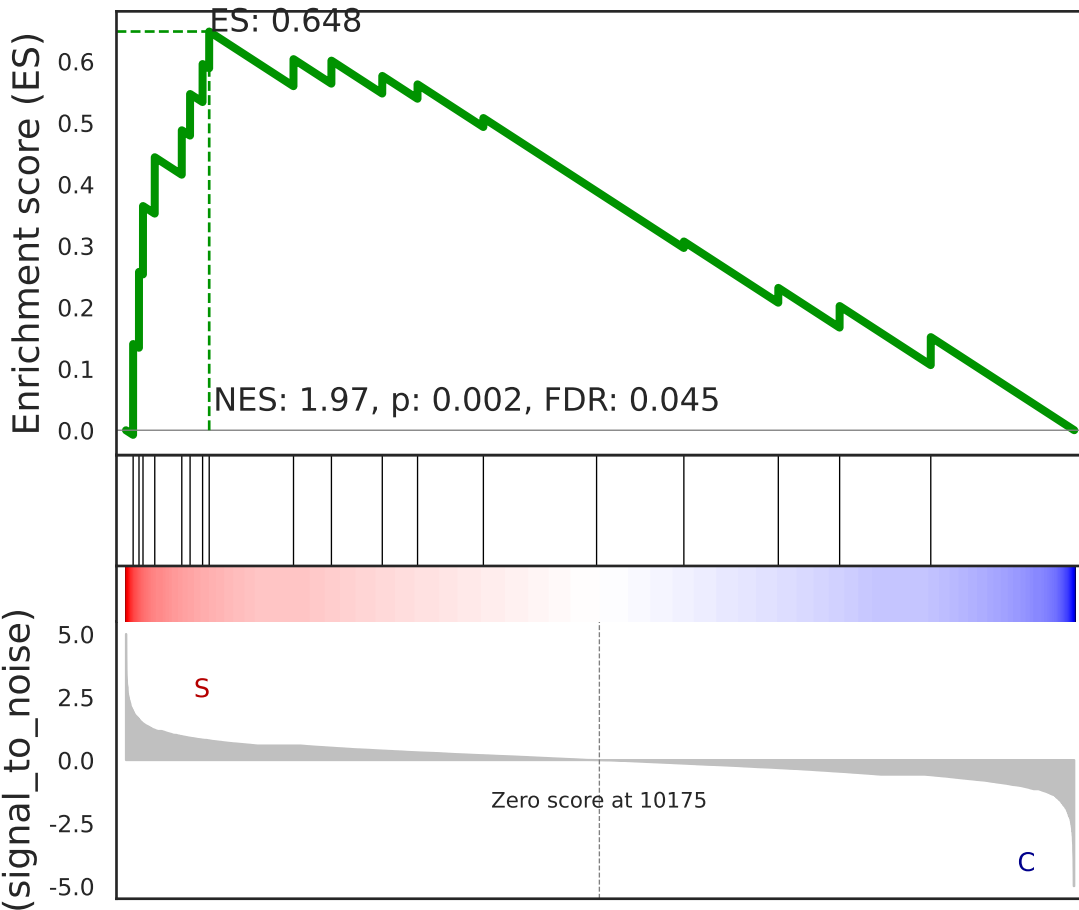

Supplement: Supplementary file 337 [file 8_positive regulation of DNA binding(GO_0043388).gsea.pdf › Source data/1.RNA-Seq source data/2.HUVECs/result/1.6.GSEA/S-vs-C/go/BP/8_positive regulation of DNA binding(GO_0043388).gsea.pdf]

positive regulation of DNA binding(GO:0043388)

Heatmap of the Analyzed GeneSet

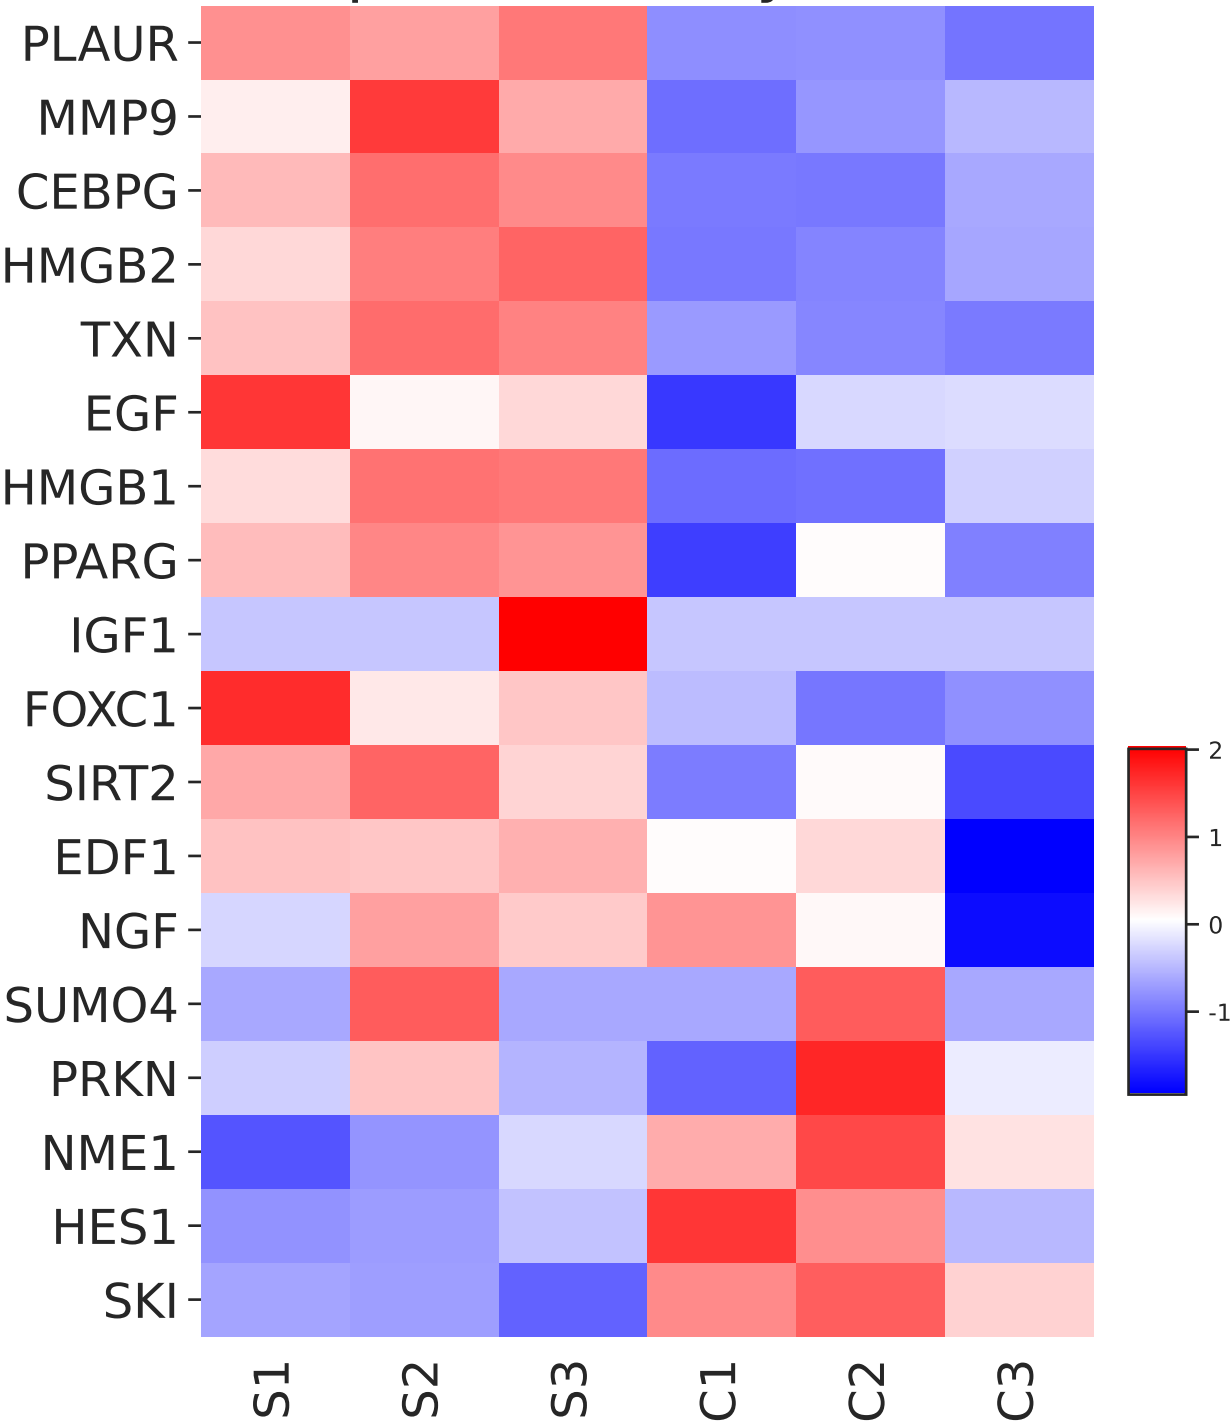

Supplement: Supplementary file 338 [file 8_positive regulation of DNA binding(GO_0043388).heatmap.pdf › Source data/1.RNA-Seq source data/2.HUVECs/result/1.6.GSEA/S-vs-C/go/BP/8_positive regulation of DNA binding(GO_0043388).heatmap.pdf]

# negative regulation of Notch signaling pathway(GO:0045746)

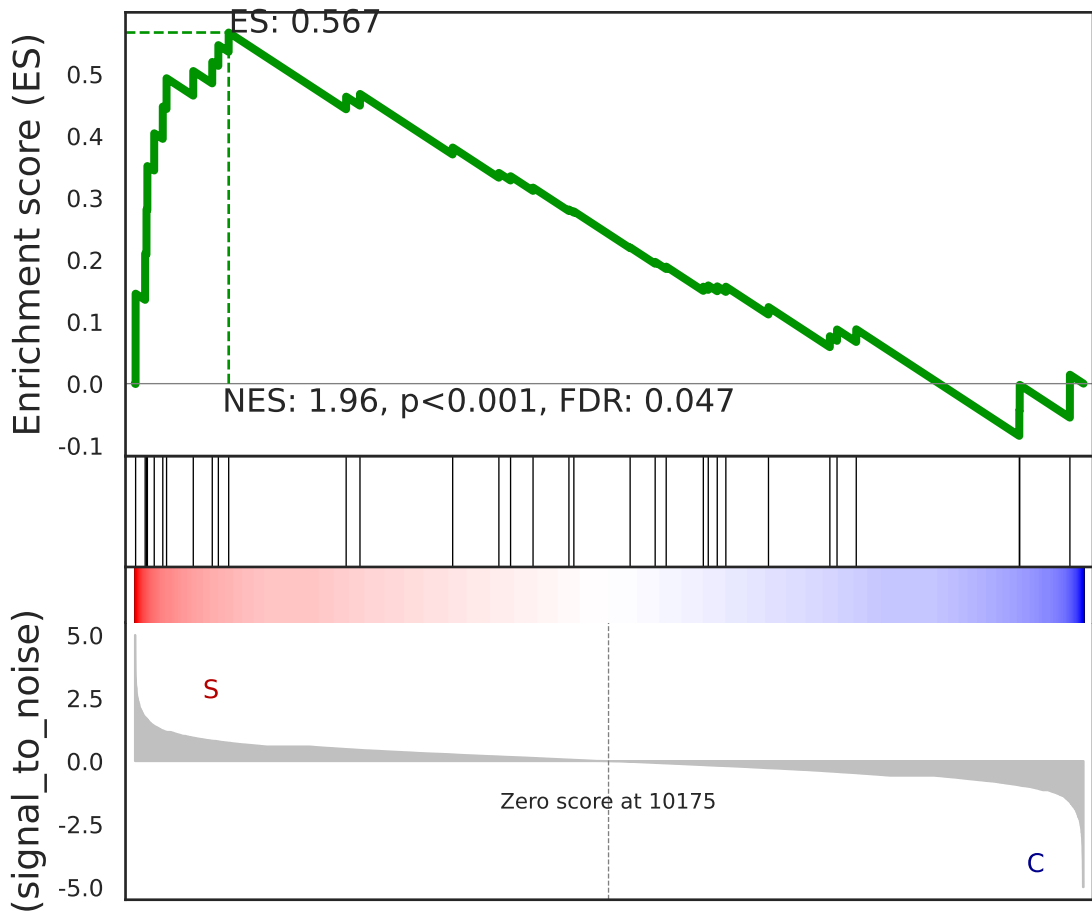

Supplement: Supplementary file 339 [file 9_negative regulation of Notch signaling pathway(GO_0045746).gsea.pdf › Source data/1.RNA-Seq source data/2.HUVECs/result/1.6.GSEA/S-vs-C/go/BP/9_negative regulation of Notch signaling pathway(GO_0045746).gsea.pdf]

negative regulation of Notch signaling pathway(GO:0045746)  
Heatmap of the Analyzed GeneSet

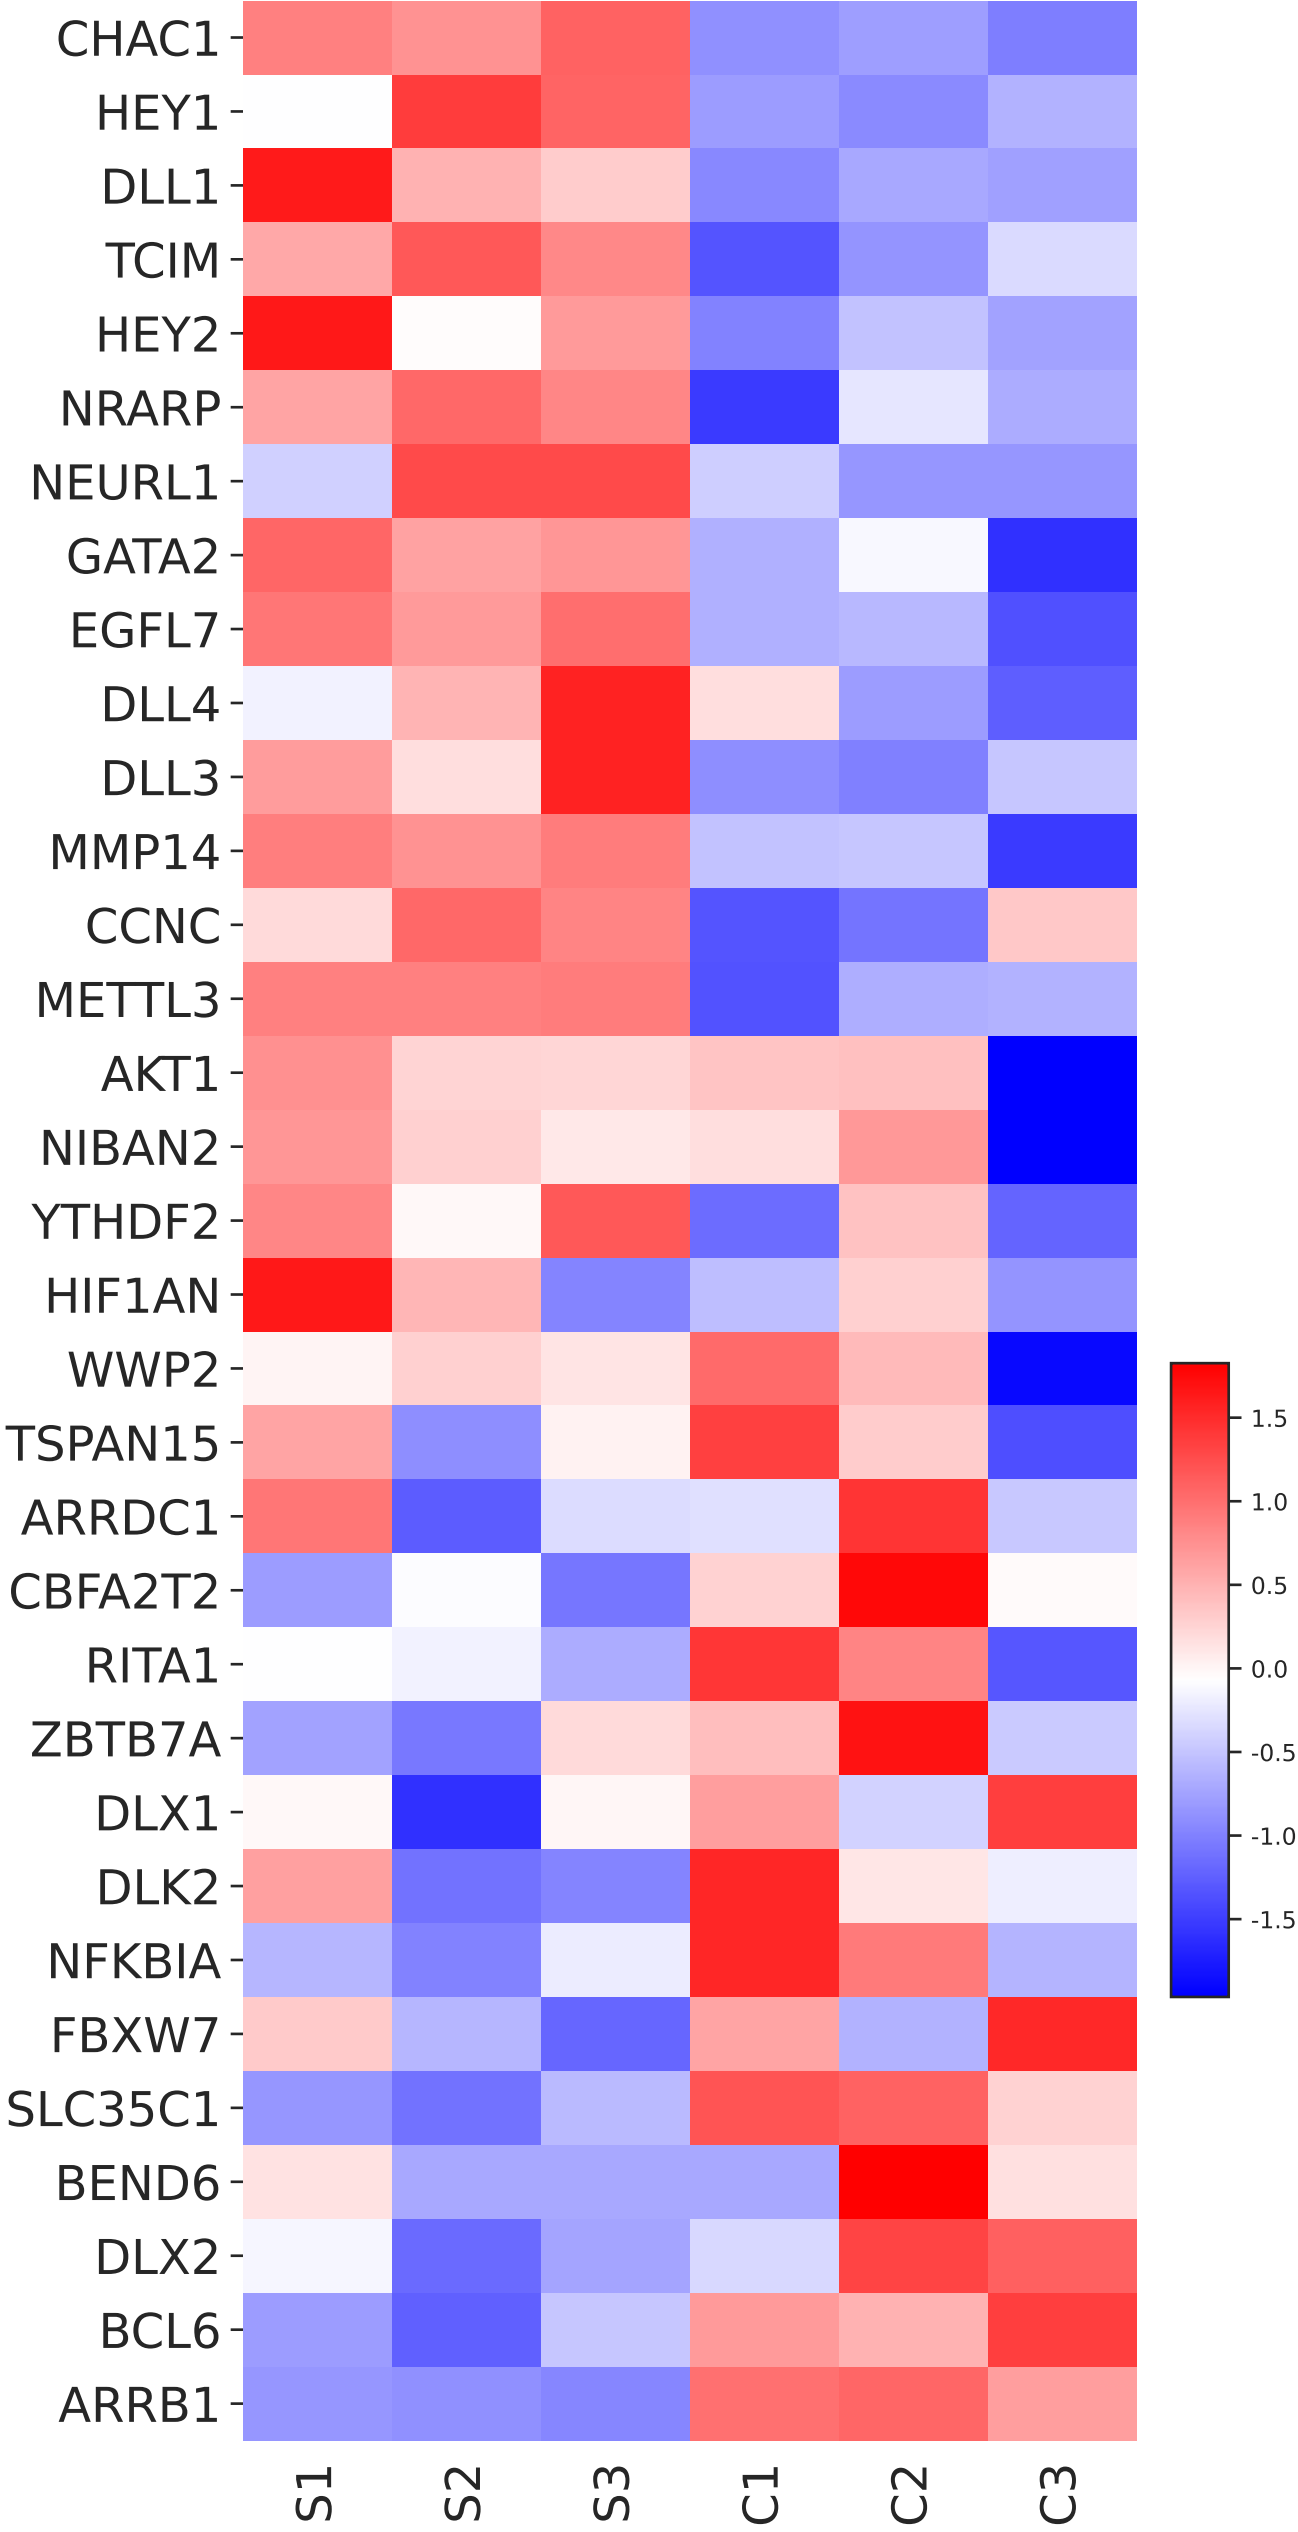

Supplement: Supplementary file 340 [file 9_negative regulation of Notch signaling pathway(GO_0045746).heatmap.pdf › Source data/1.RNA-Seq source data/2.HUVECs/result/1.6.GSEA/S-vs-C/go/BP/9_negative regulation of Notch signaling pathway(GO_0045746).heatmap.pdf]

# polysomal ribosome(GO:0042788)

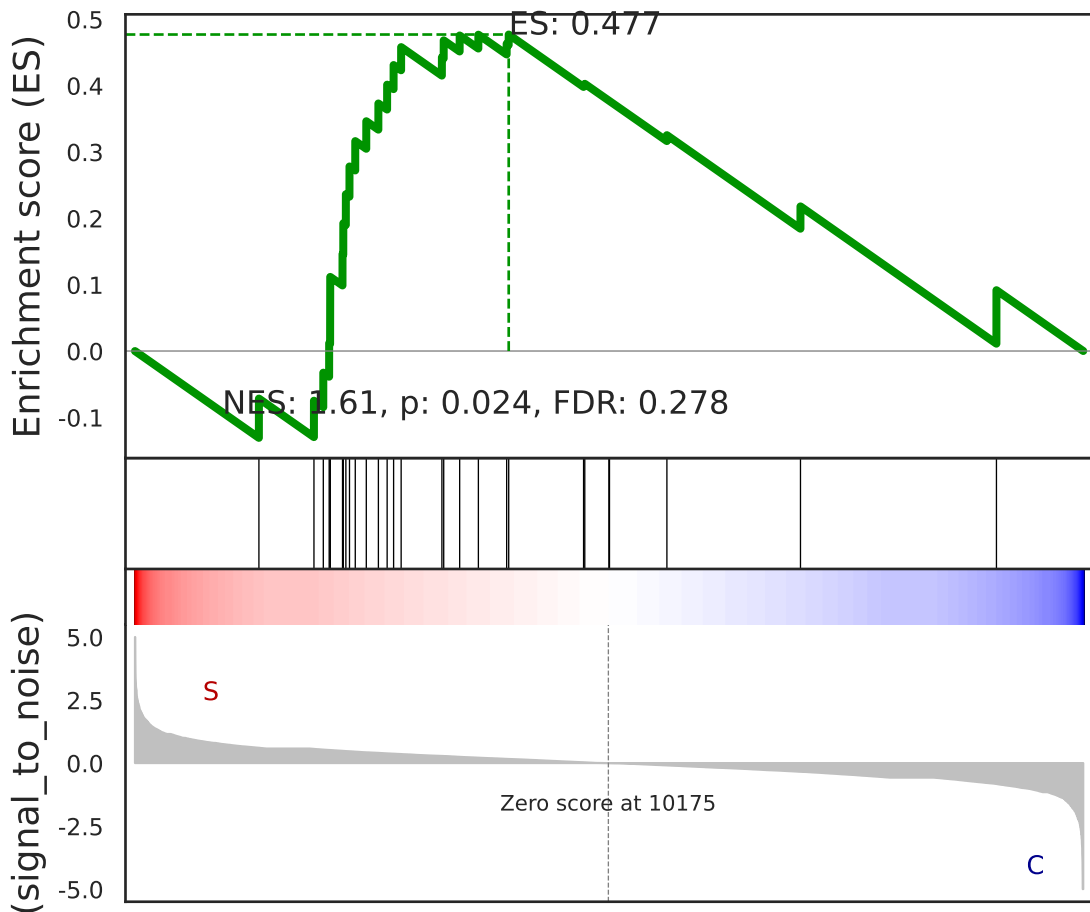

Supplement: Supplementary file 341 [file 10_polysomal ribosome(GO_0042788).gsea.pdf › Source data/1.RNA-Seq source data/2.HUVECs/result/1.6.GSEA/S-vs-C/go/CC/10_polysomal ribosome(GO_0042788).gsea.pdf]

polysomal ribosome(GO:0042788)  
Heatmap of the Analyzed GeneSet

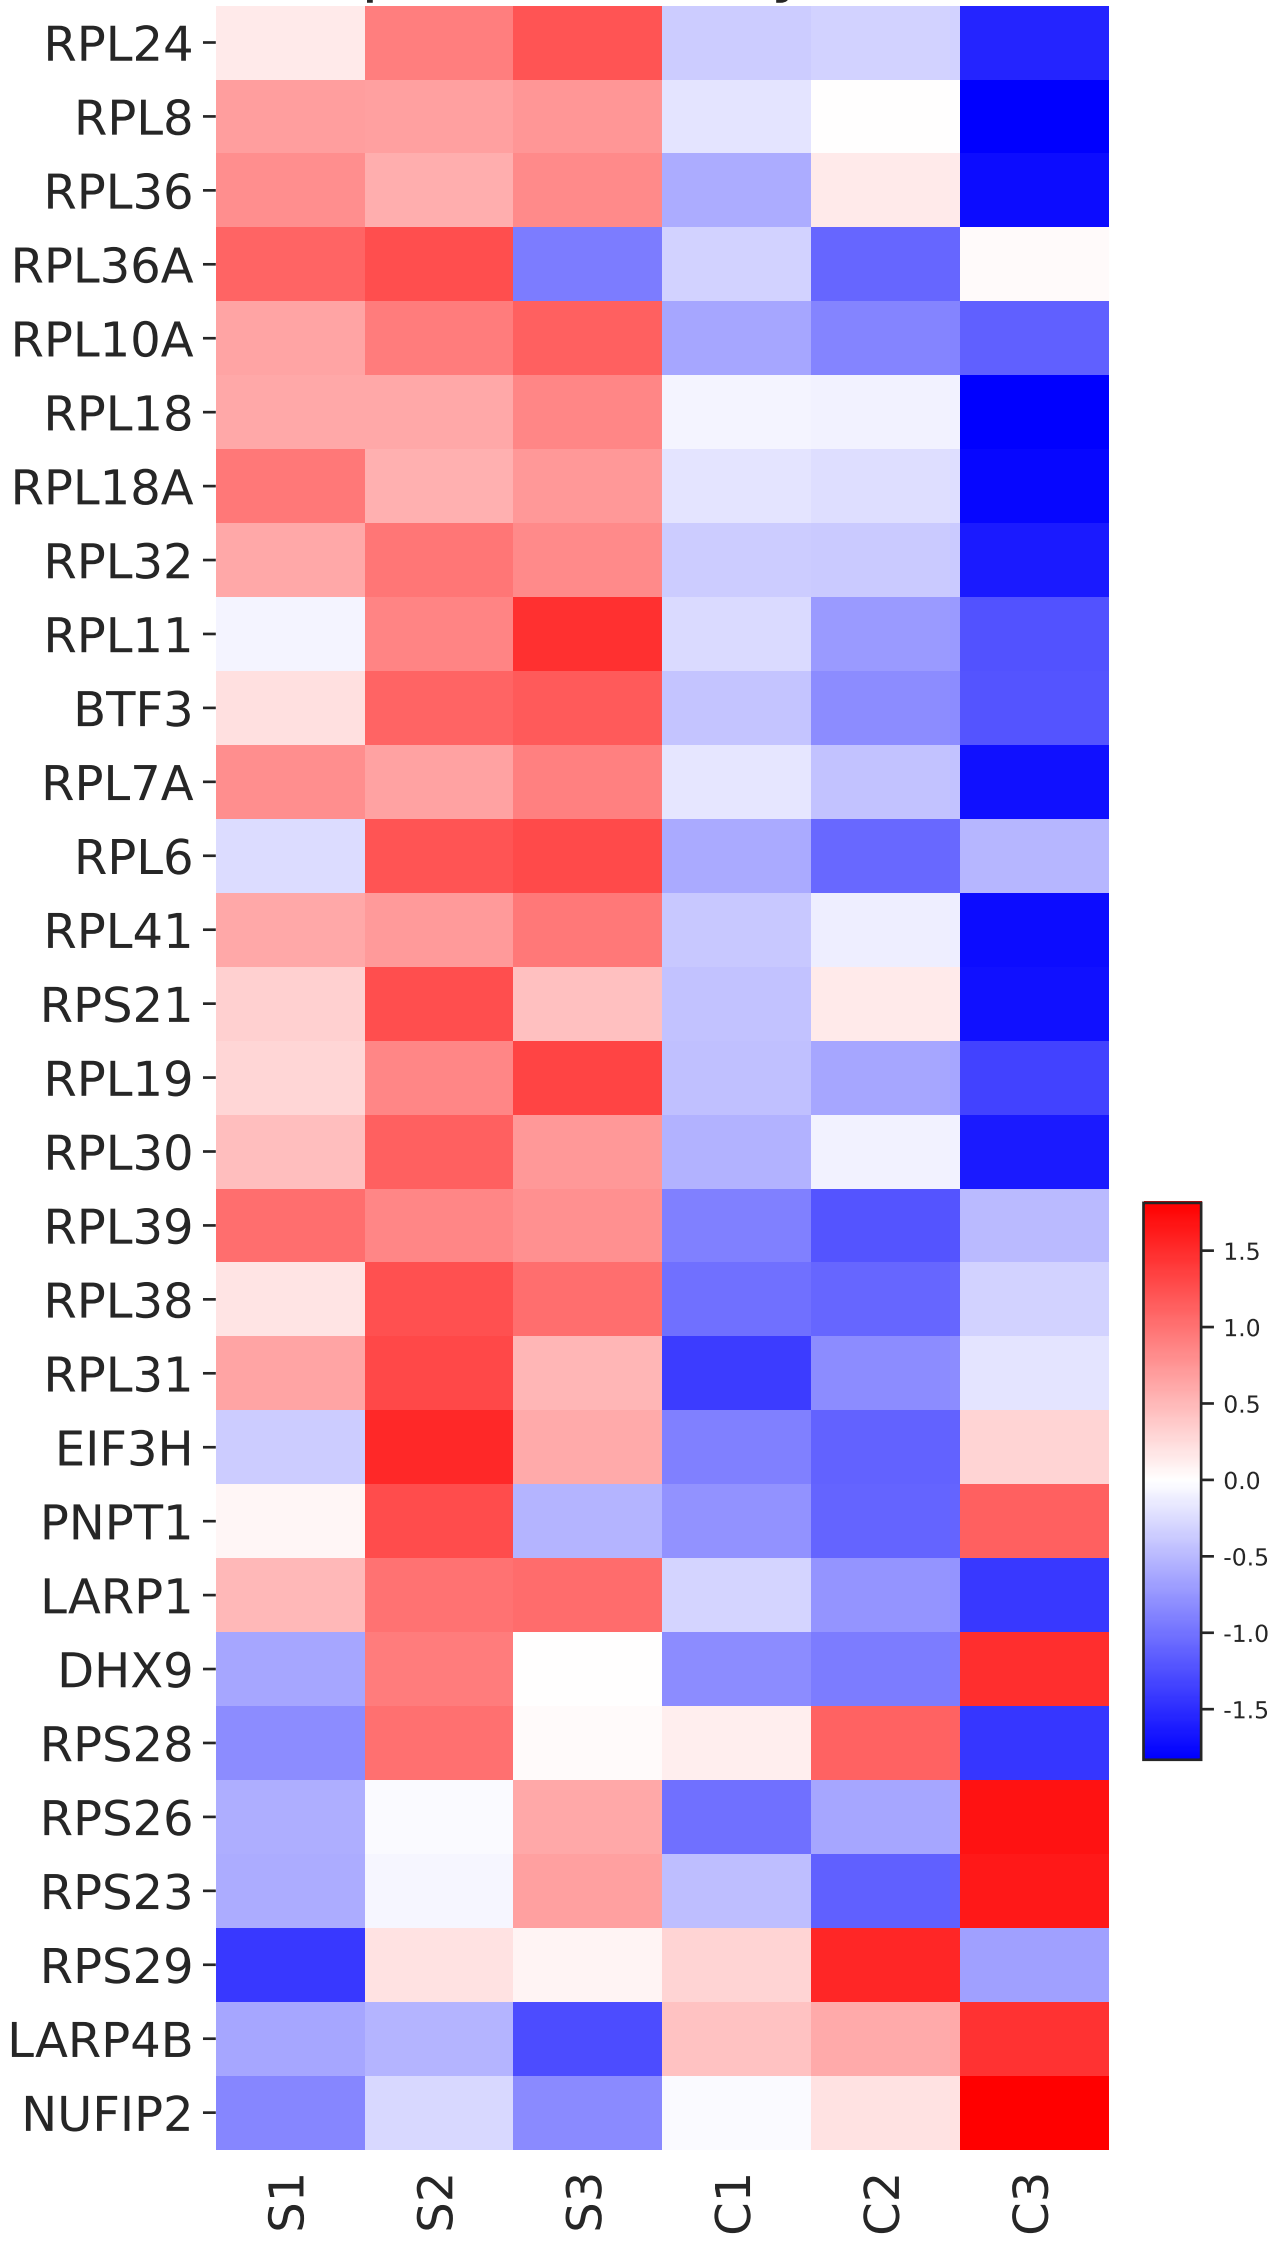

Supplement: Supplementary file 342 [file 10_polysomal ribosome(GO_0042788).heatmap.pdf › Source data/1.RNA-Seq source data/2.HUVECs/result/1.6.GSEA/S-vs-C/go/CC/10_polysomal ribosome(GO_0042788).heatmap.pdf]

# cytosolic large ribosomal subunit(GO:0022625)

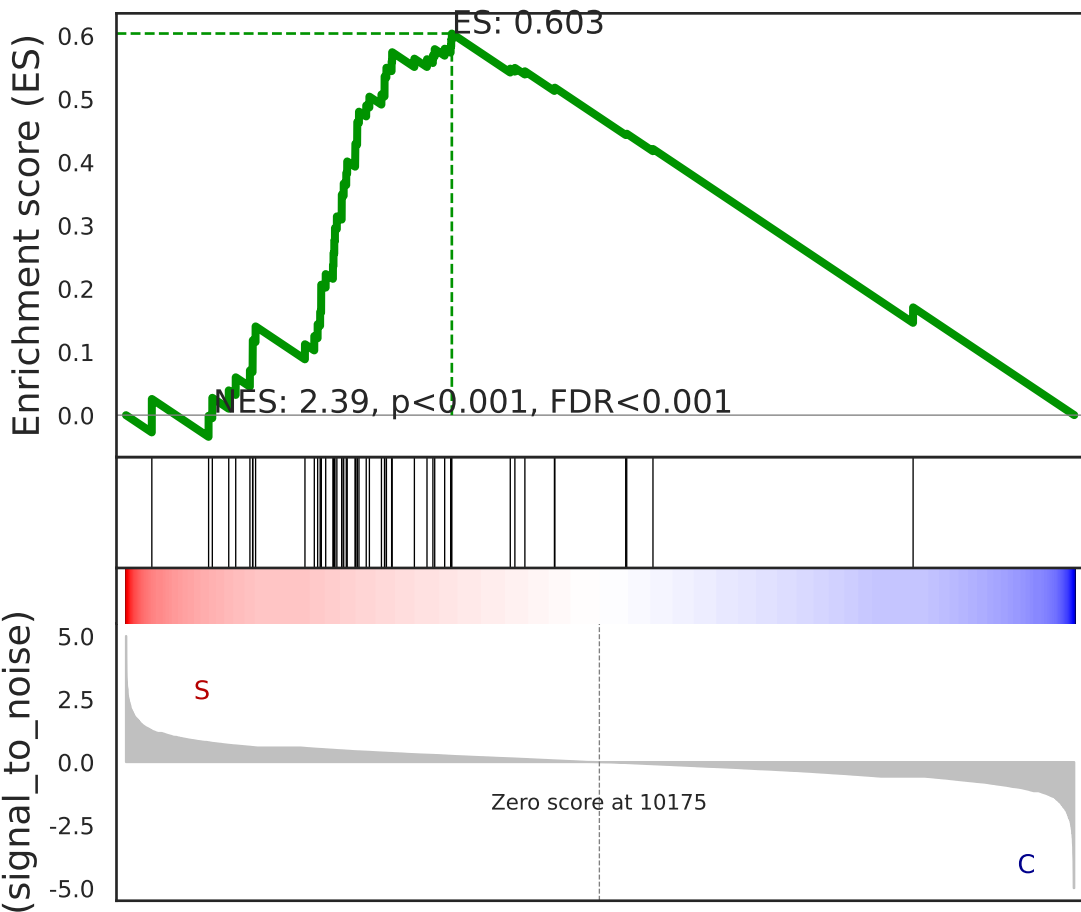

Supplement: Supplementary file 343 [file 1_cytosolic large ribosomal subunit(GO_0022625).gsea.pdf › Source data/1.RNA-Seq source data/2.HUVECs/result/1.6.GSEA/S-vs-C/go/CC/1_cytosolic large ribosomal subunit(GO_0022625).gsea.pdf]

cytosolic large ribosomal subunit(GO:0022625)  
Heatmap of the Analyzed GeneSet

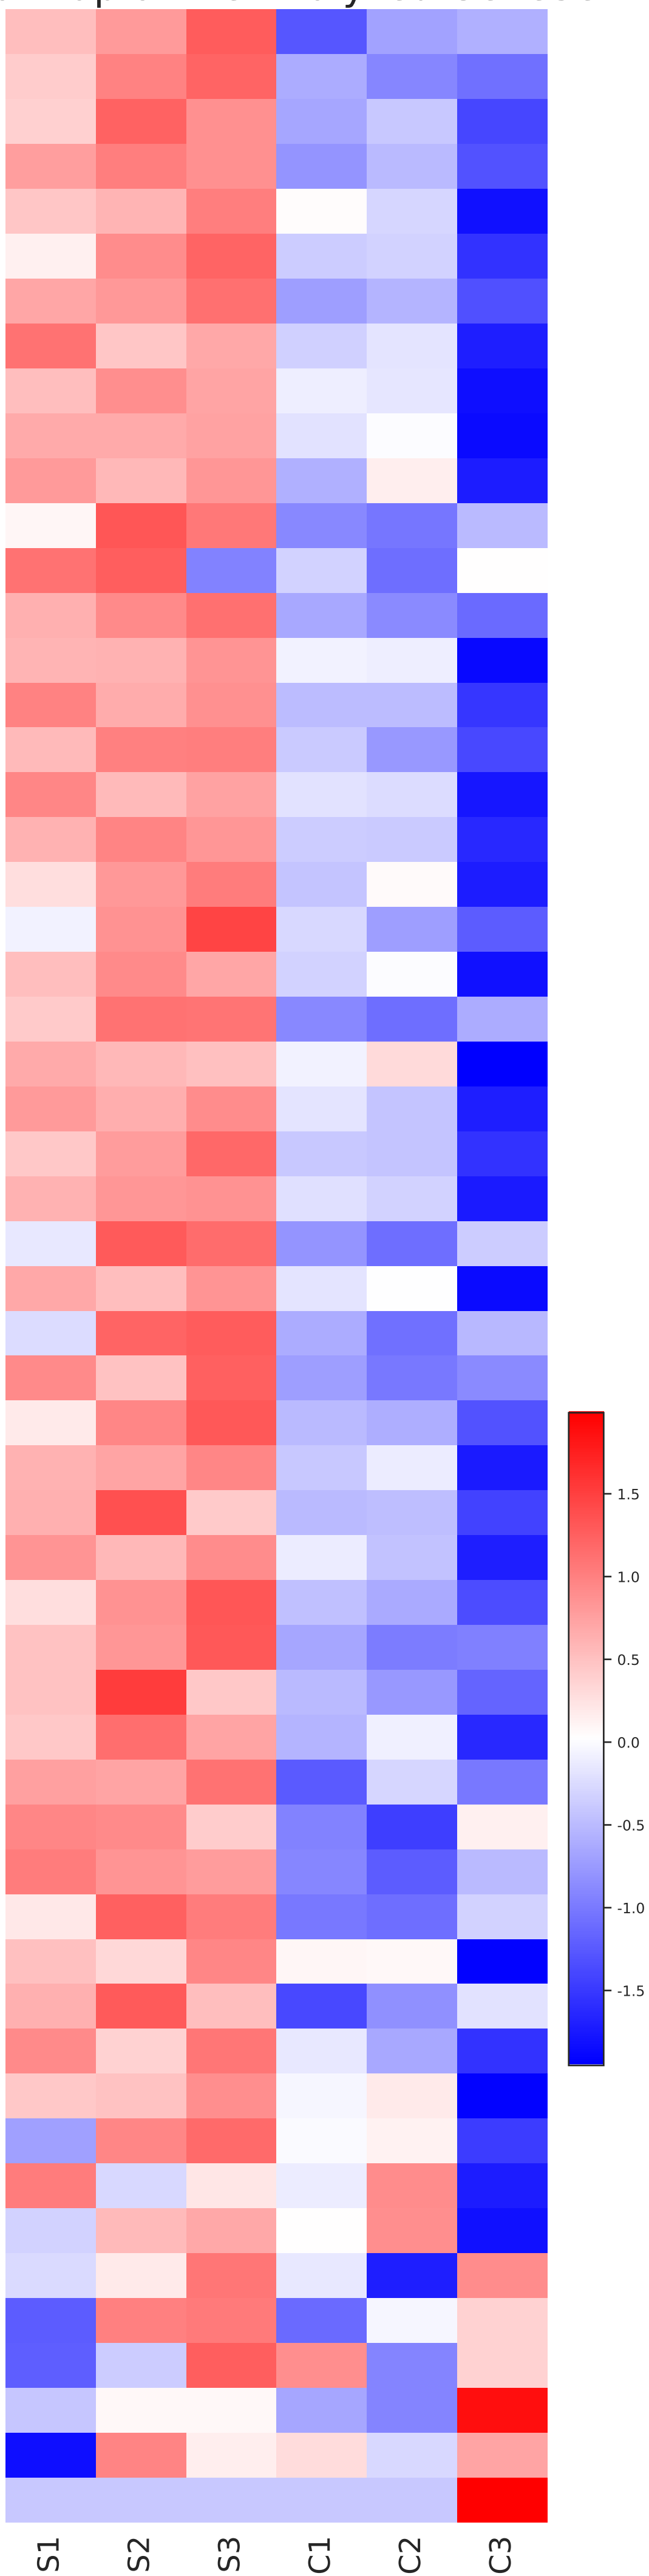

Supplement: Supplementary file 344 [file 1_cytosolic large ribosomal subunit(GO_0022625).heatmap.pdf › Source data/1.RNA-Seq source data/2.HUVECs/result/1.6.GSEA/S-vs-C/go/CC/1_cytosolic large ribosomal subunit(GO_0022625).heatmap.pdf]

# sarcoplasm(GO:0016528)

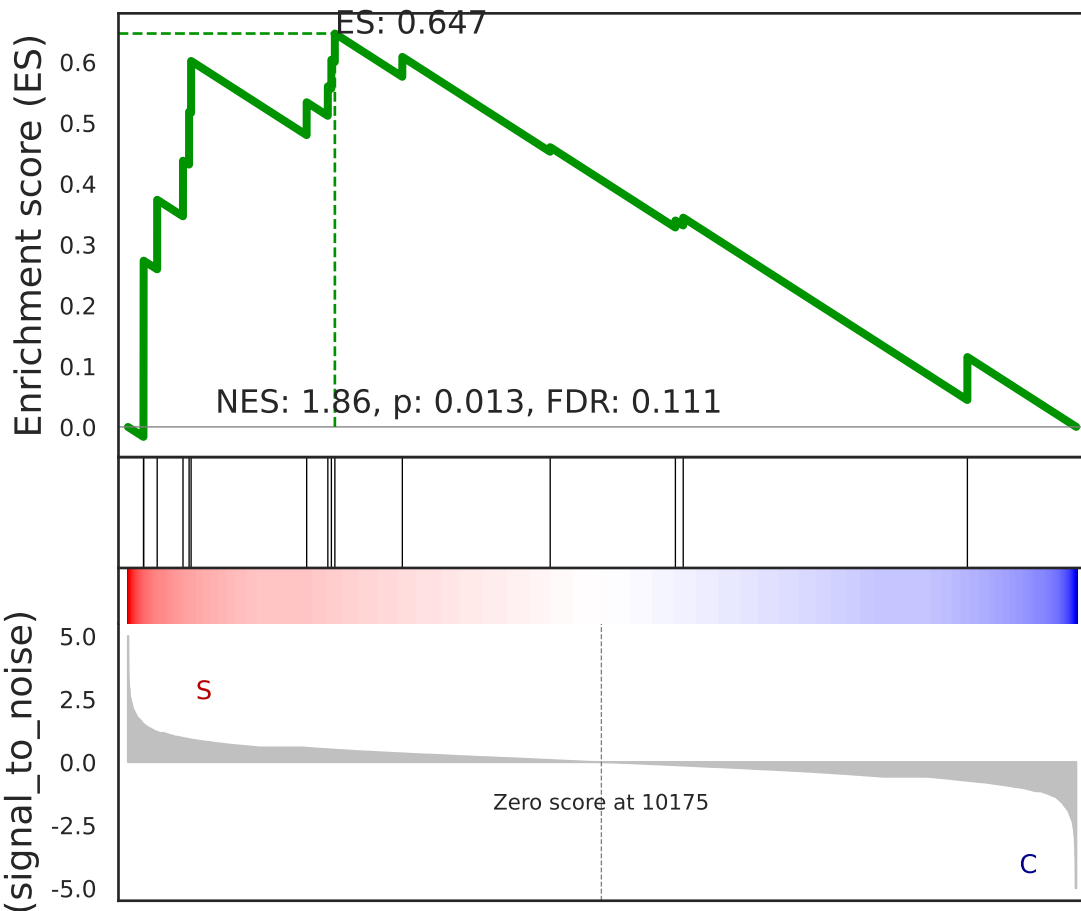

Supplement: Supplementary file 345 [file 2_sarcoplasm(GO_0016528).gsea.pdf › Source data/1.RNA-Seq source data/2.HUVECs/result/1.6.GSEA/S-vs-C/go/CC/2_sarcoplasm(GO_0016528).gsea.pdf]

sarcoplasm(GO:0016528)

Heatmap of the Analyzed GeneSet

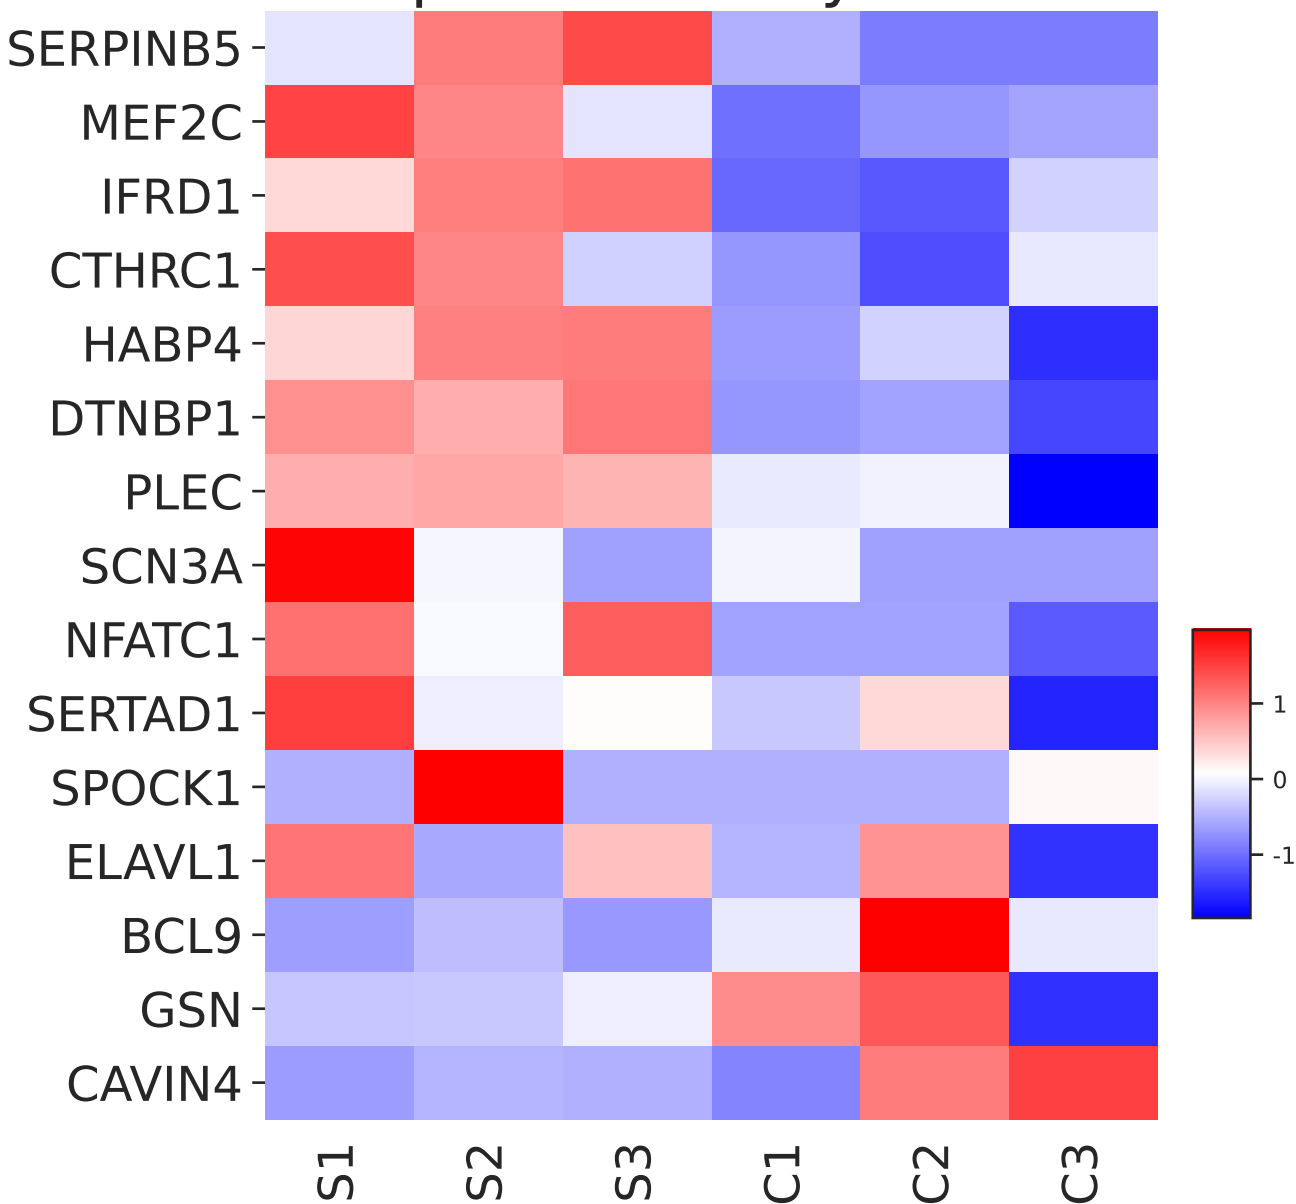

Supplement: Supplementary file 346 [file 2_sarcoplasm(GO_0016528).heatmap.pdf › Source data/1.RNA-Seq source data/2.HUVECs/result/1.6.GSEA/S-vs-C/go/CC/2_sarcoplasm(GO_0016528).heatmap.pdf]

# vesicle membrane(GO:0012506)

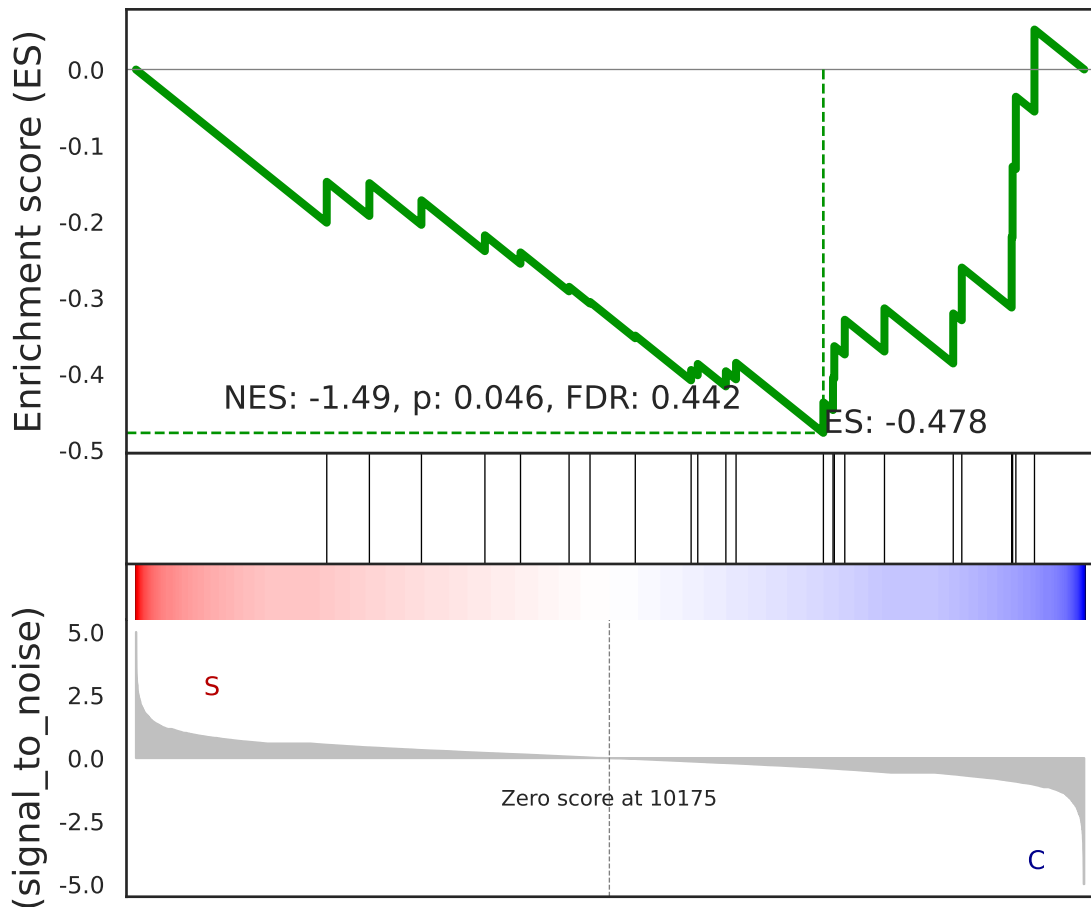

Supplement: Supplementary file 347 [file 359_vesicle membrane(GO_0012506).gsea.pdf › Source data/1.RNA-Seq source data/2.HUVECs/result/1.6.GSEA/S-vs-C/go/CC/359_vesicle membrane(GO_0012506).gsea.pdf]

# vesicle membrane(GO:0012506)

## Heatmap of the Analyzed GeneSet

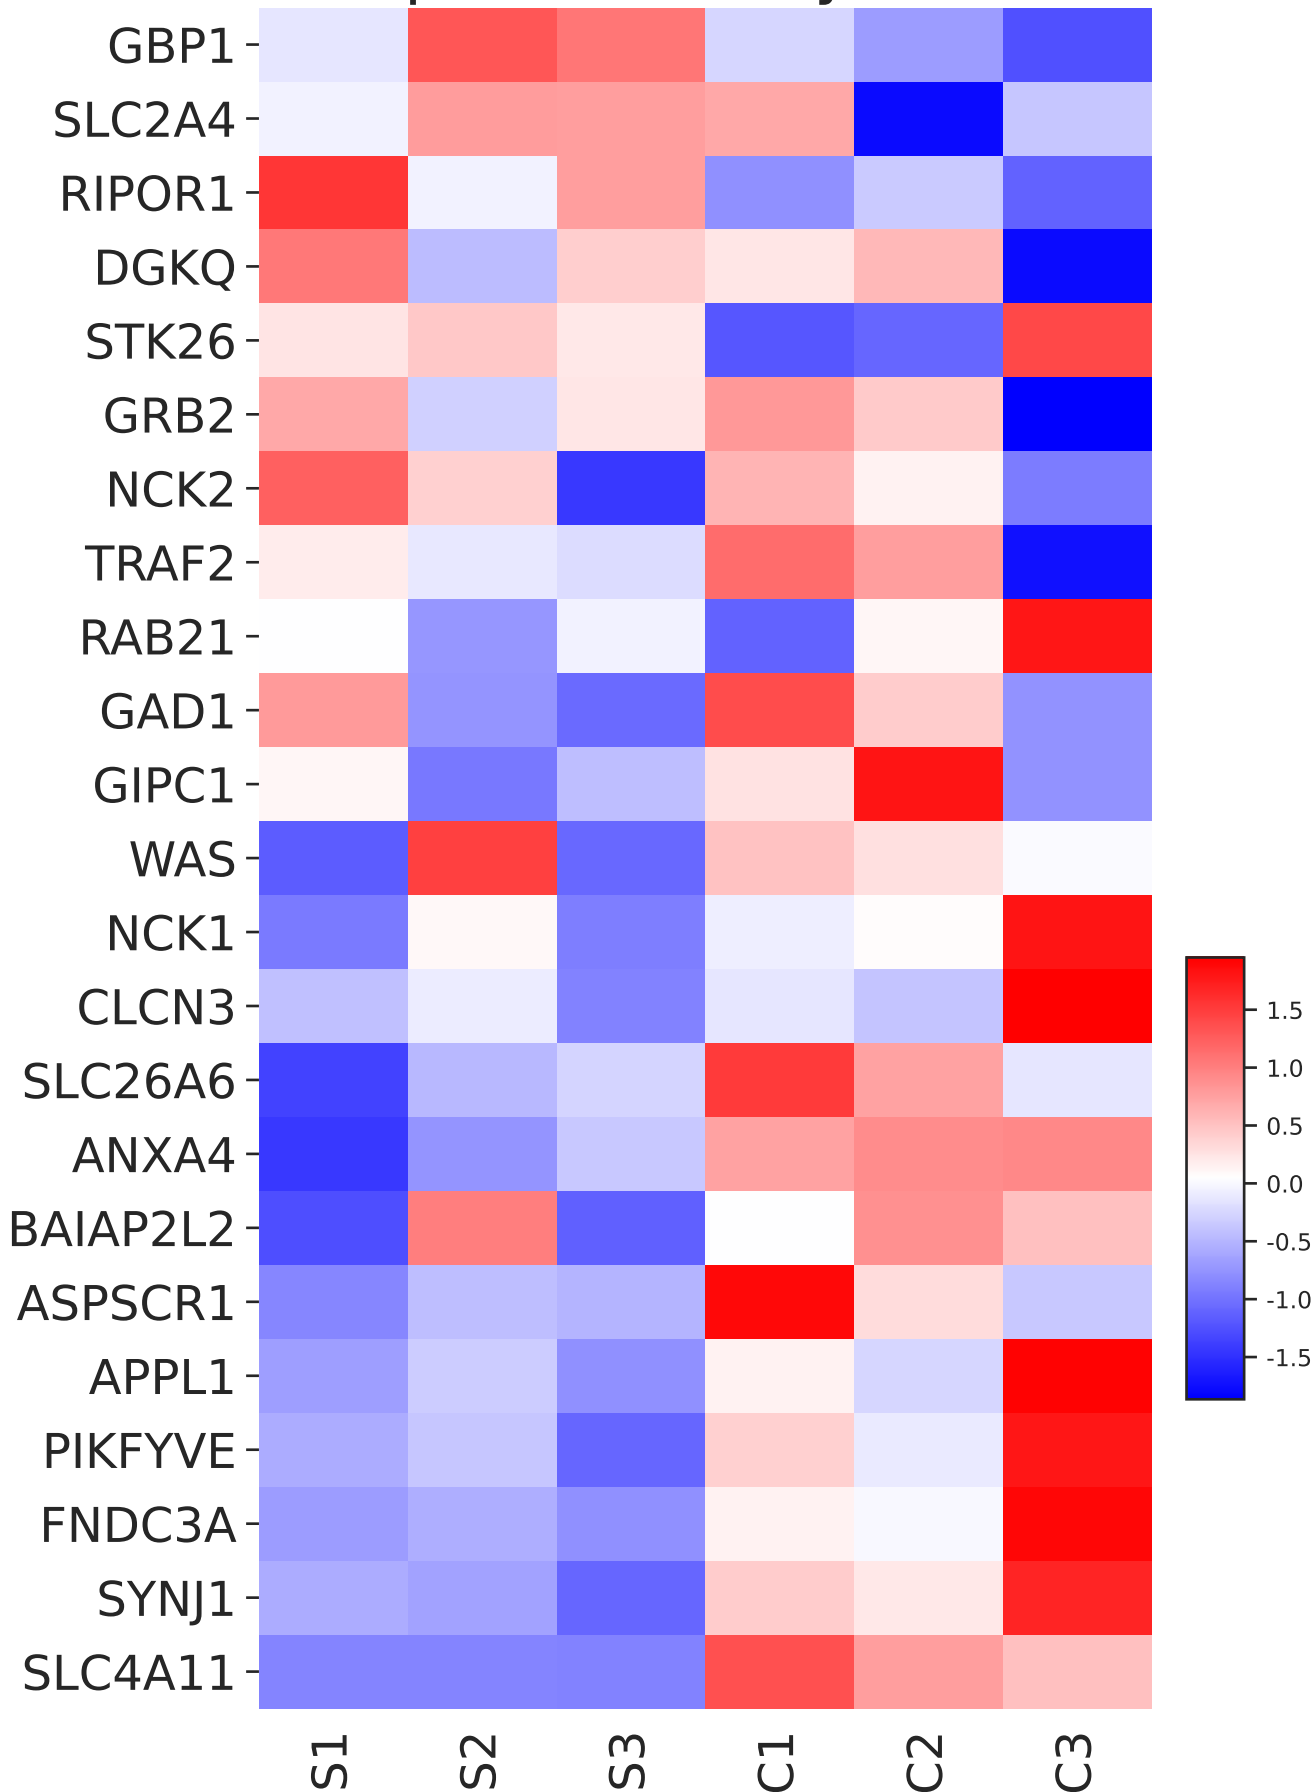

Supplement: Supplementary file 348 [file 359_vesicle membrane(GO_0012506).heatmap.pdf › Source data/1.RNA-Seq source data/2.HUVECs/result/1.6.GSEA/S-vs-C/go/CC/359_vesicle membrane(GO_0012506).heatmap.pdf]

# high-density lipoprotein particle(GO:0034364)

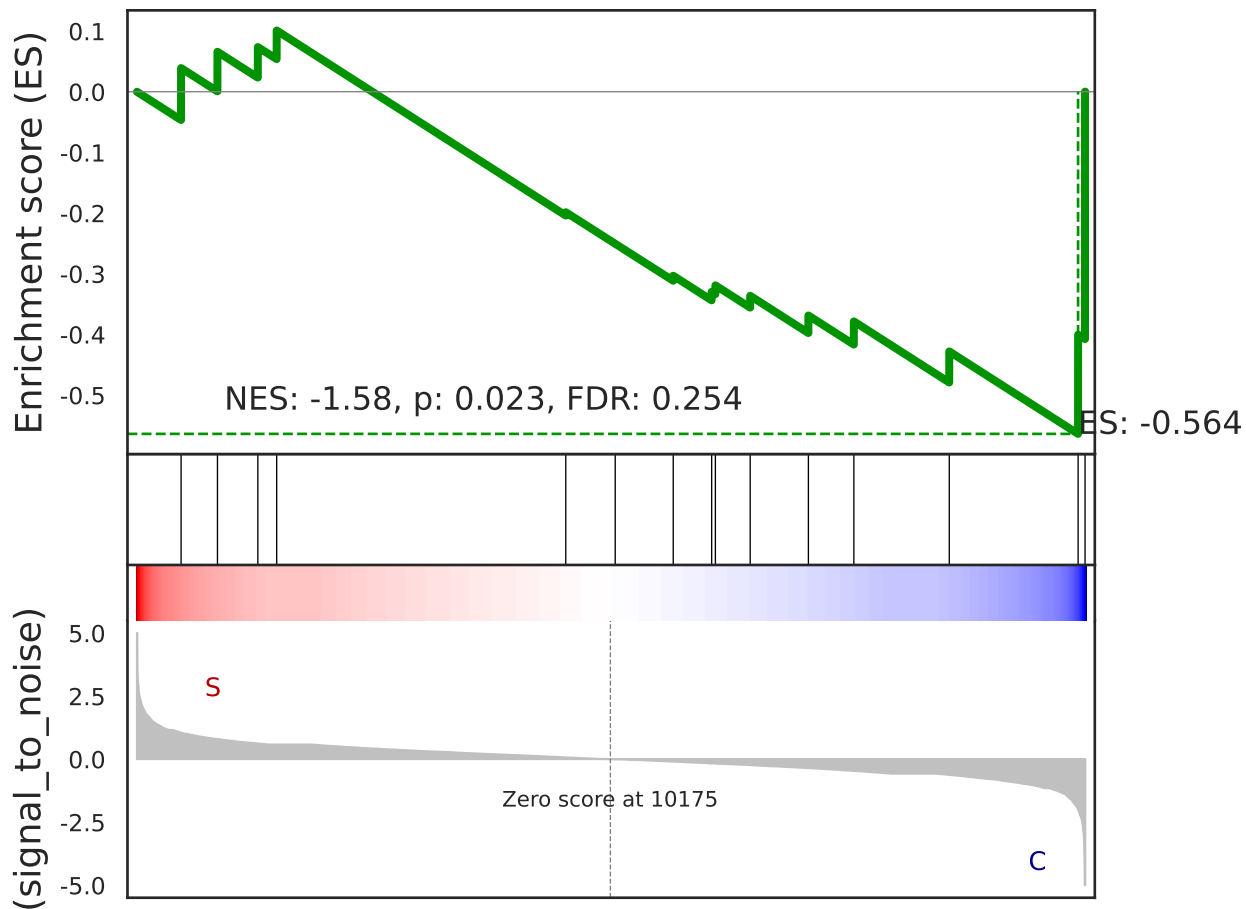

Supplement: Supplementary file 349 [file 360_high-density lipoprotein particle(GO_0034364).gsea.pdf › Source data/1.RNA-Seq source data/2.HUVECs/result/1.6.GSEA/S-vs-C/go/CC/360_high-density lipoprotein particle(GO_0034364).gsea.pdf]

# high-density lipoprotein particle(GO:0034364)

## Heatmap of the Analyzed GeneSet

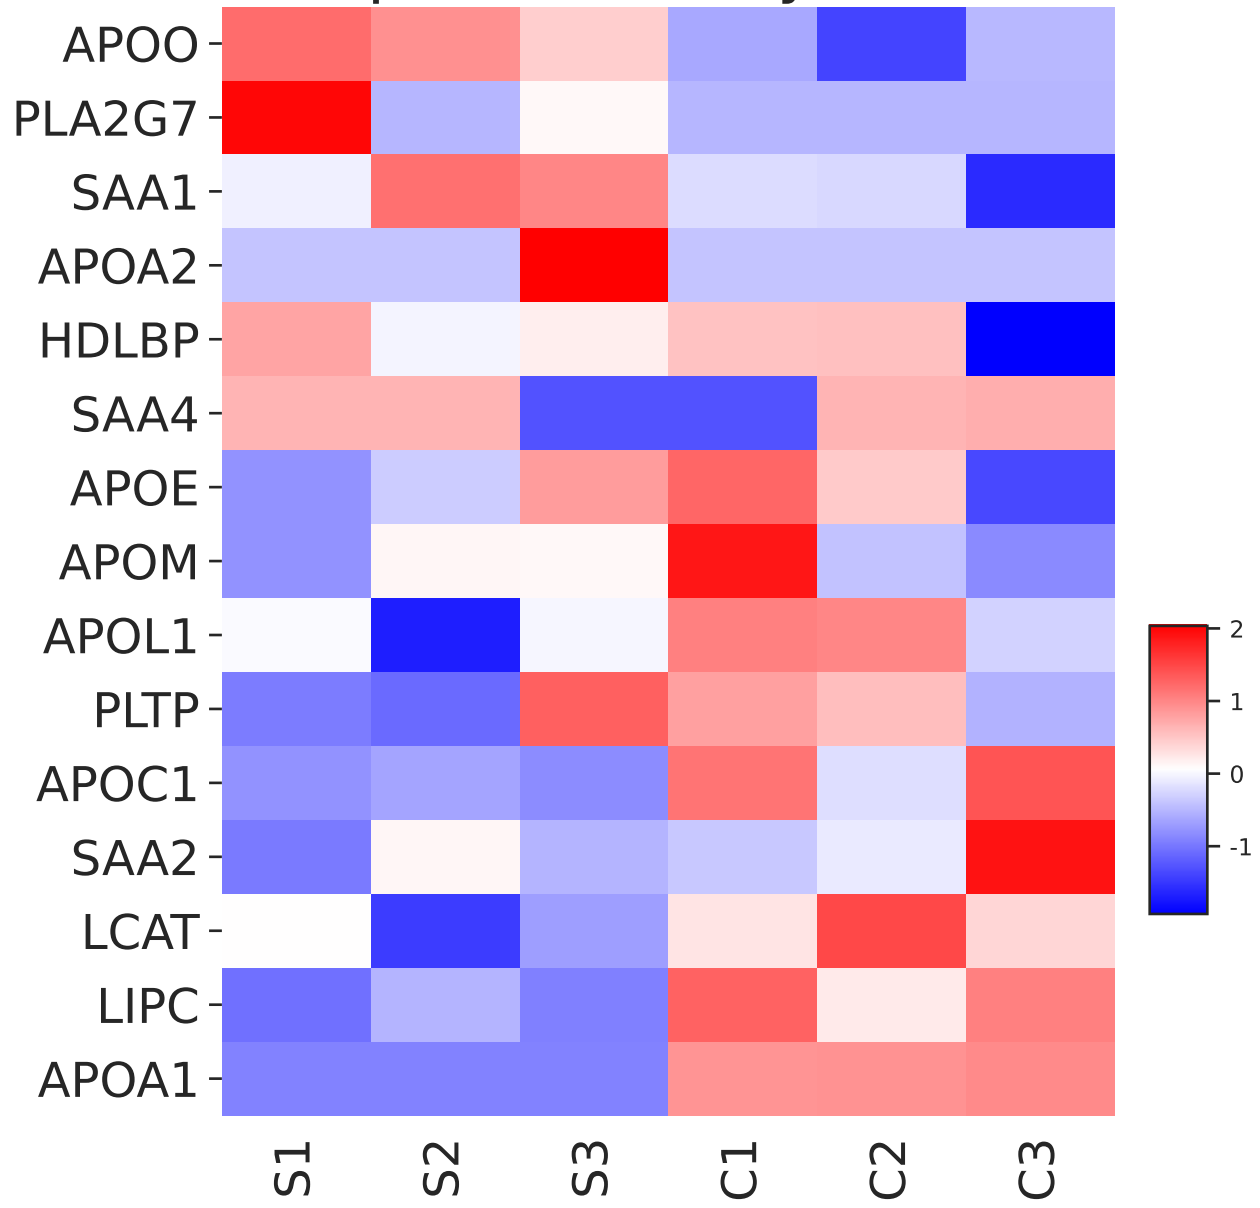

Supplement: Supplementary file 350 [file 360_high-density lipoprotein particle(GO_0034364).heatmap.pdf › Source data/1.RNA-Seq source data/2.HUVECs/result/1.6.GSEA/S-vs-C/go/CC/360_high-density lipoprotein particle(GO_0034364).heatmap.pdf]

# basement membrane(GO:0005604)

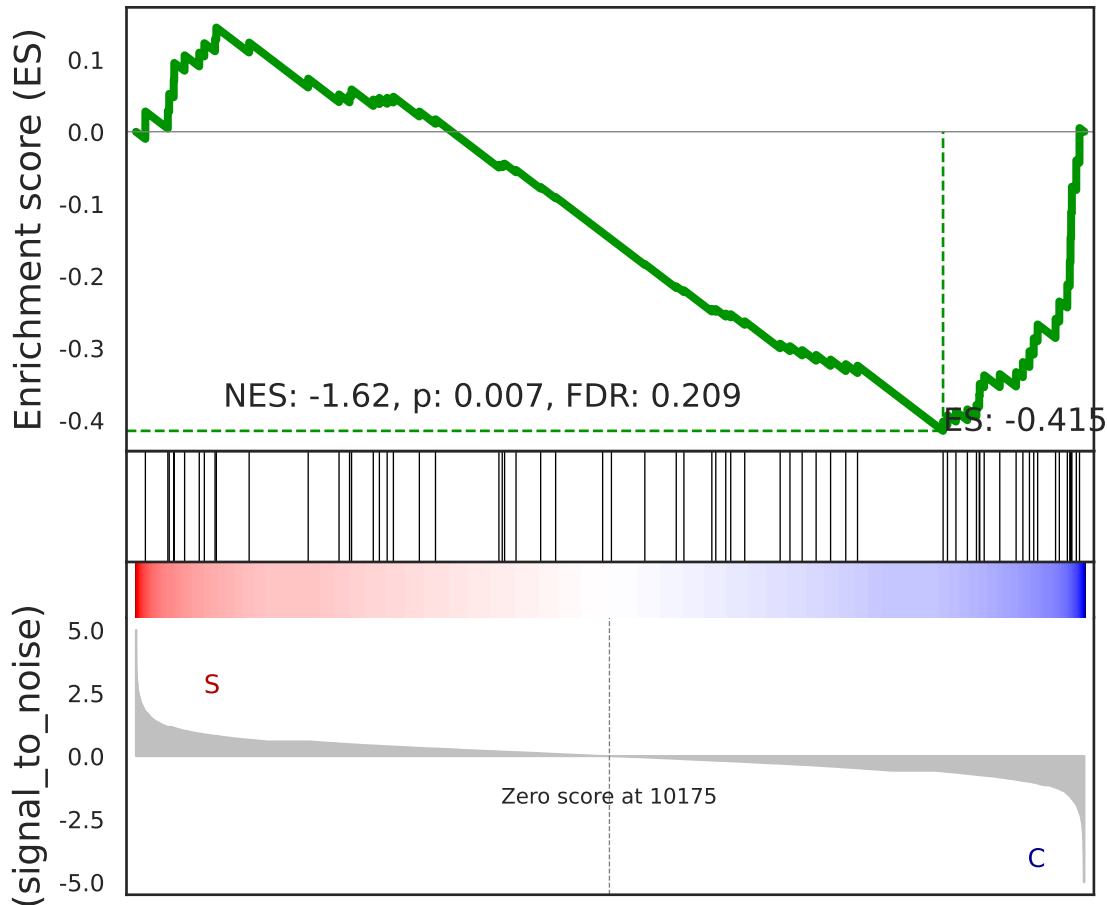

Supplement: Supplementary file 351 [file 361_basement membrane(GO_0005604).gsea.pdf › Source data/1.RNA-Seq source data/2.HUVECs/result/1.6.GSEA/S-vs-C/go/CC/361_basement membrane(GO_0005604).gsea.pdf]

basement membrane(GO:0005604)  
Heatmap of the Analyzed GeneSet

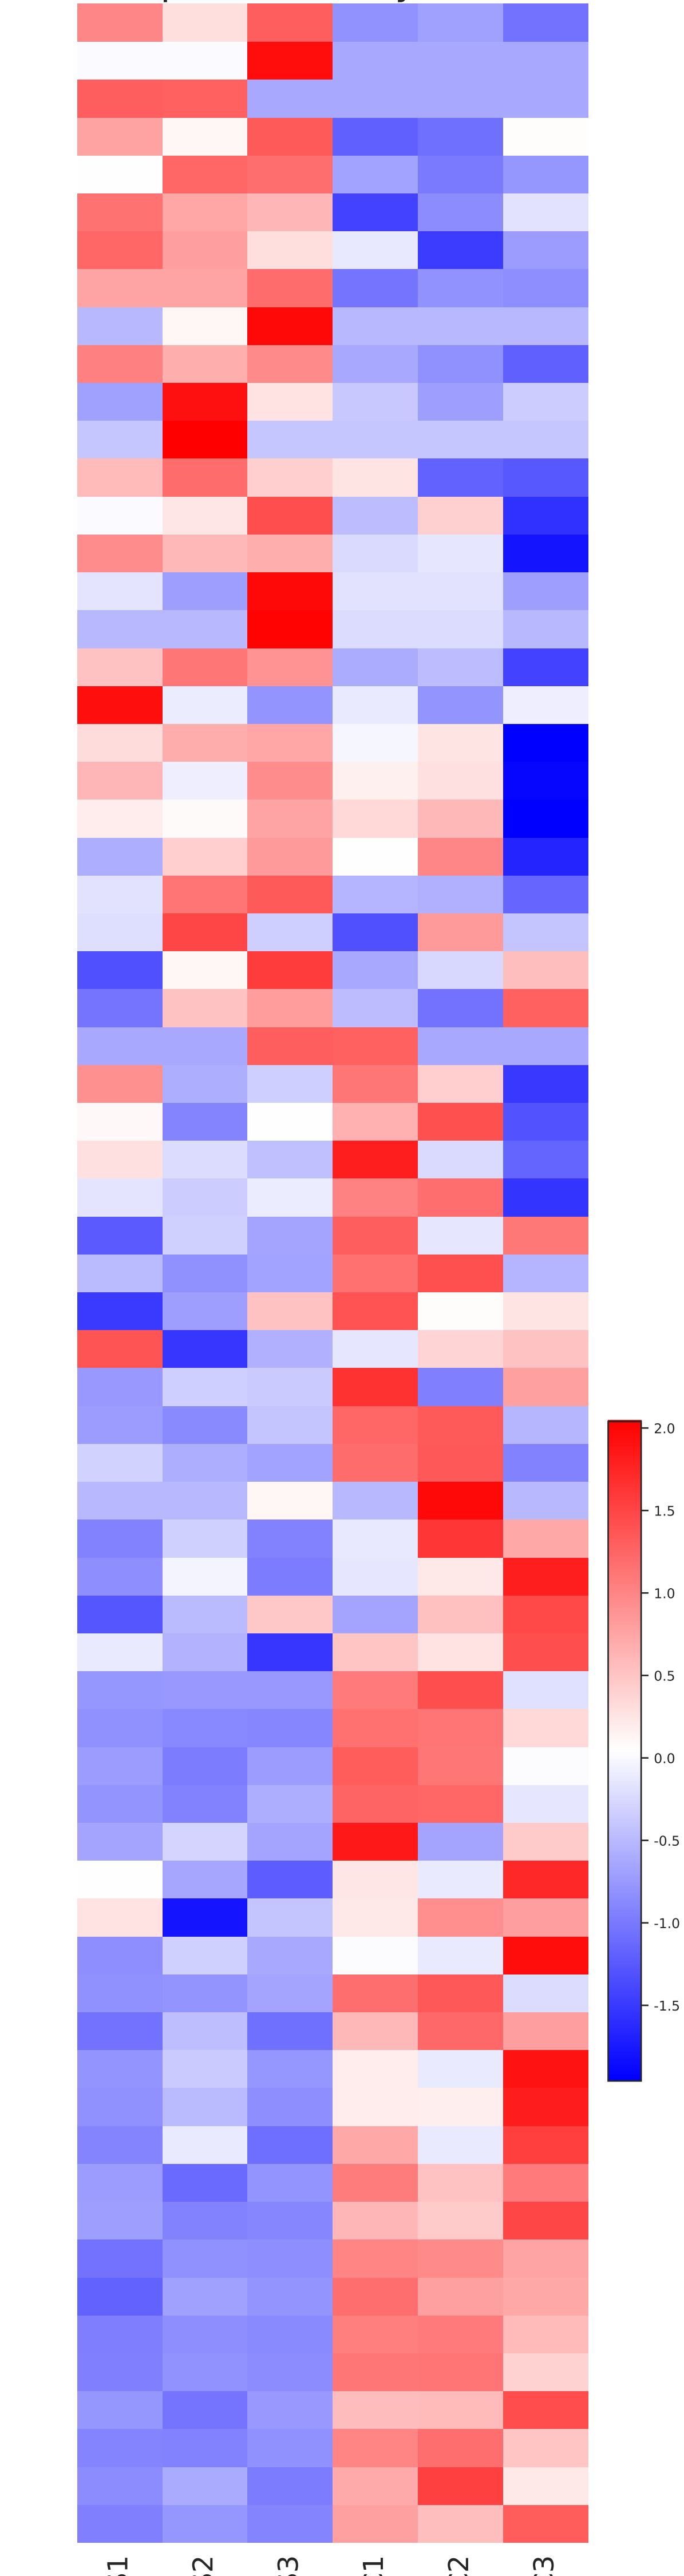

Supplement: Supplementary file 352 [file 361_basement membrane(GO_0005604).heatmap.pdf › Source data/1.RNA-Seq source data/2.HUVECs/result/1.6.GSEA/S-vs-C/go/CC/361_basement membrane(GO_0005604).heatmap.pdf]

# acrosomal membrane(GO:0002080)

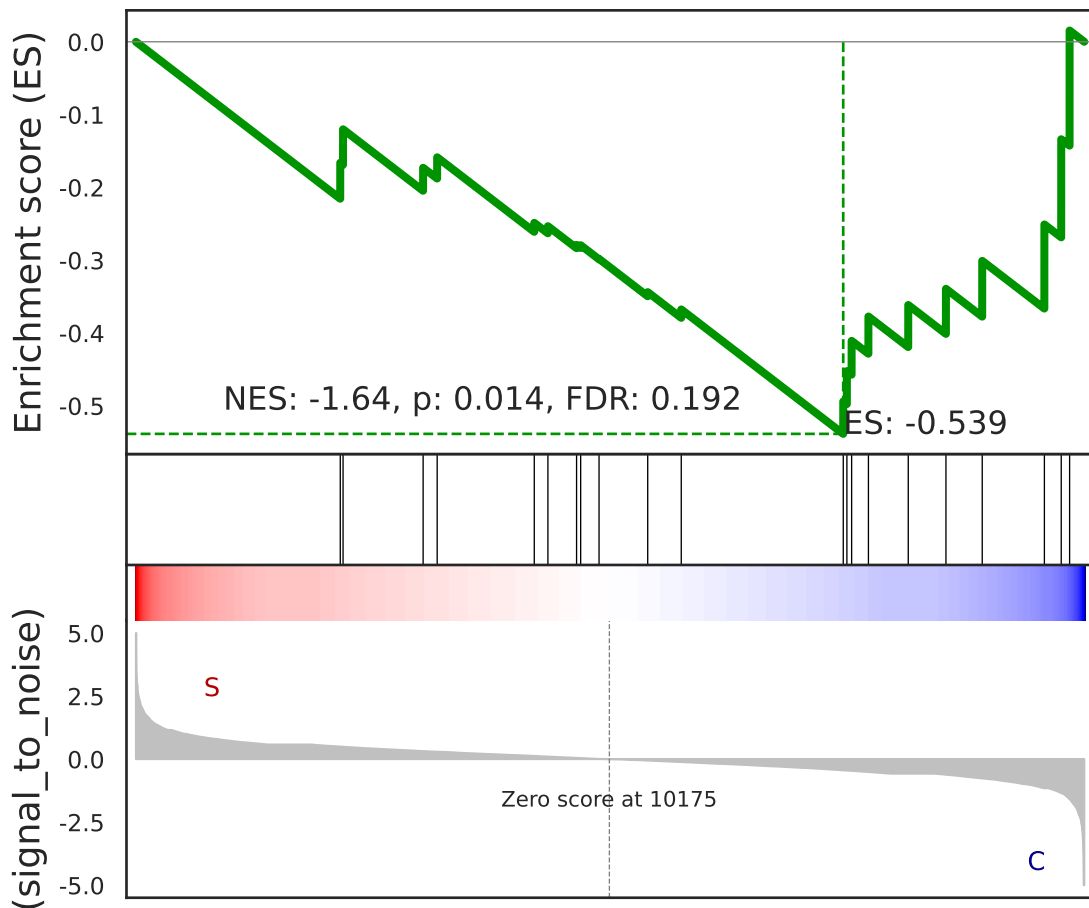

Supplement: Supplementary file 353 [file 362_acrosomal membrane(GO_0002080).gsea.pdf › Source data/1.RNA-Seq source data/2.HUVECs/result/1.6.GSEA/S-vs-C/go/CC/362_acrosomal membrane(GO_0002080).gsea.pdf]

acrosomal membrane(GO:0002080)  
Heatmap of the Analyzed GeneSet

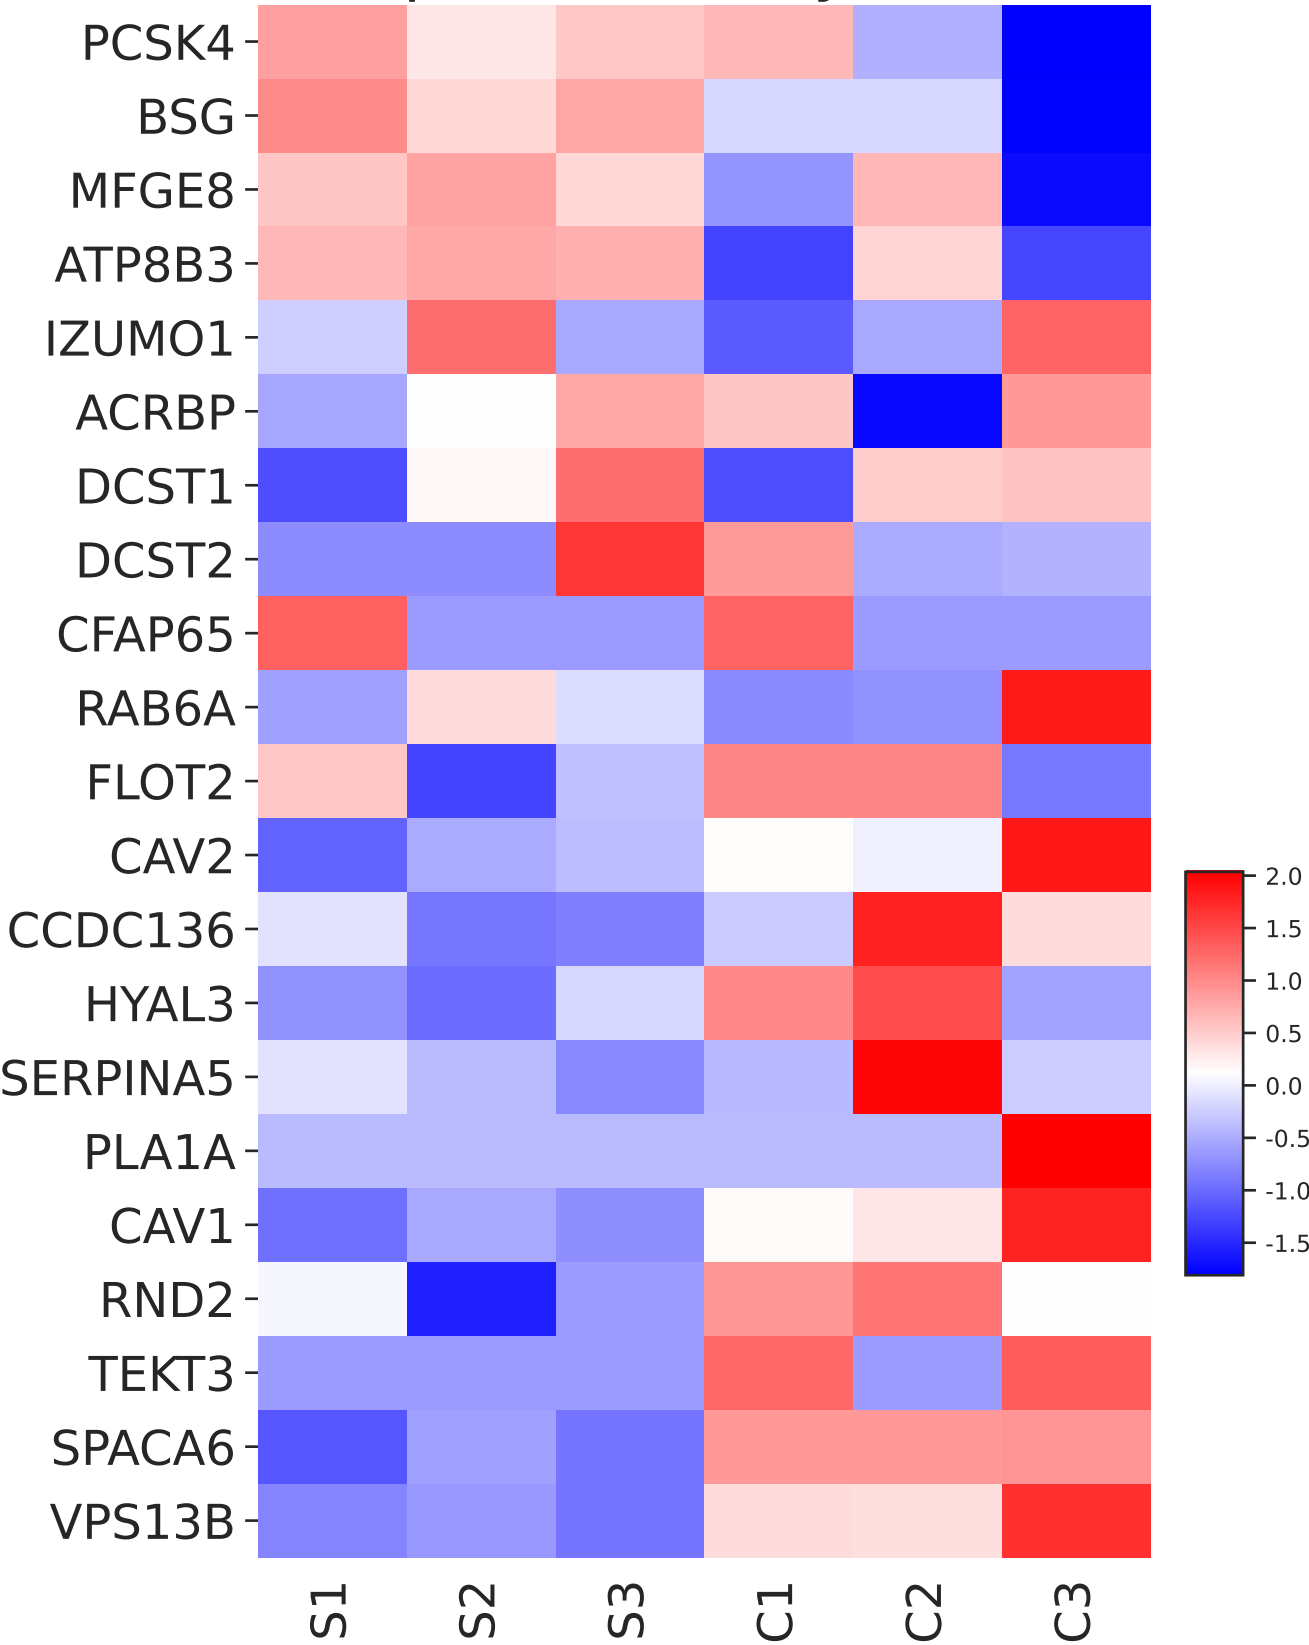

Supplement: Supplementary file 354 [file 362_acrosomal membrane(GO_0002080).heatmap.pdf › Source data/1.RNA-Seq source data/2.HUVECs/result/1.6.GSEA/S-vs-C/go/CC/362_acrosomal membrane(GO_0002080).heatmap.pdf]

# integrin complex(GO:0008305)

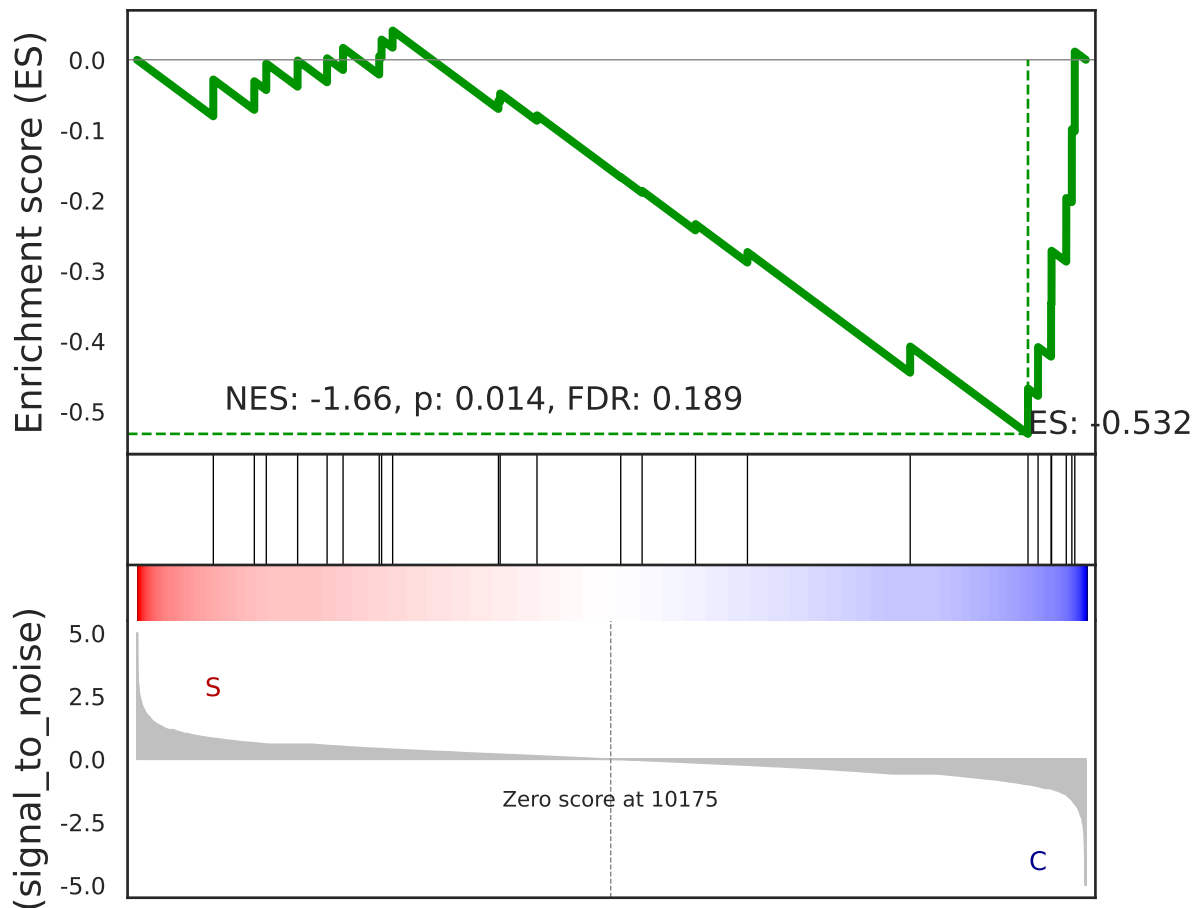

Supplement: Supplementary file 355 [file 363_integrin complex(GO_0008305).gsea.pdf › Source data/1.RNA-Seq source data/2.HUVECs/result/1.6.GSEA/S-vs-C/go/CC/363_integrin complex(GO_0008305).gsea.pdf]

# integrin complex(GO:0008305)

## Heatmap of the Analyzed GeneSet

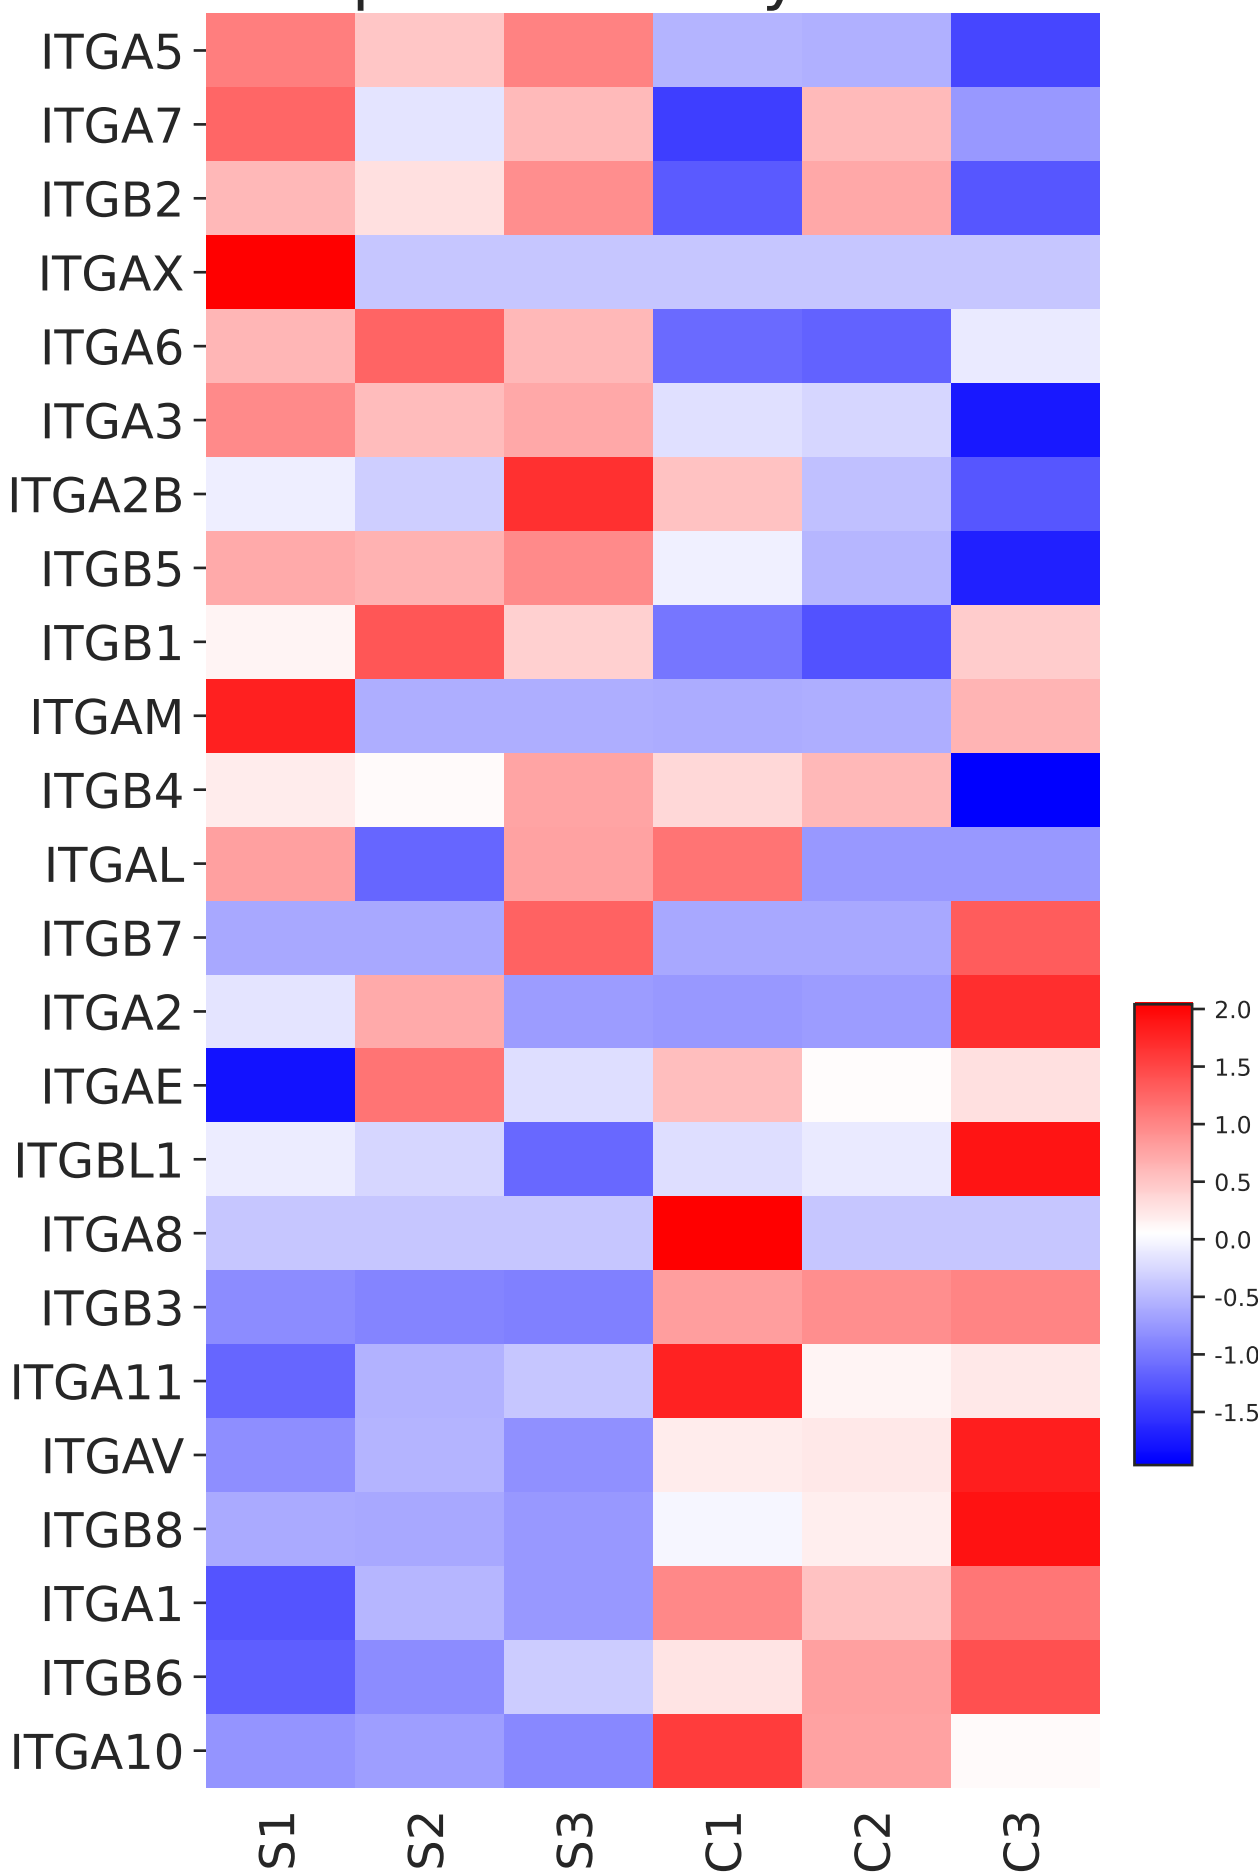

Supplement: Supplementary file 356 [file 363_integrin complex(GO_0008305).heatmap.pdf › Source data/1.RNA-Seq source data/2.HUVECs/result/1.6.GSEA/S-vs-C/go/CC/363_integrin complex(GO_0008305).heatmap.pdf]

# endoplasmic reticulum exit site(GO:0070971)

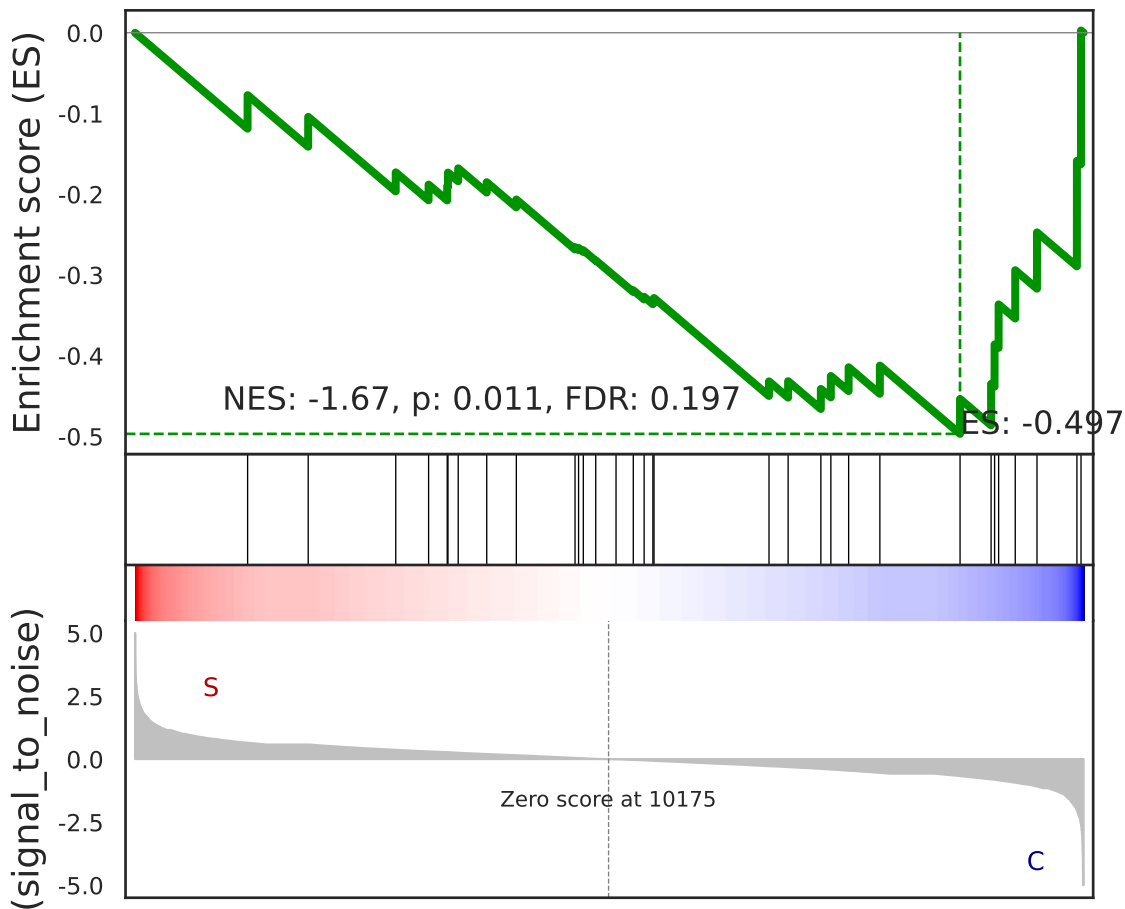

Supplement: Supplementary file 357 [file 364_endoplasmic reticulum exit site(GO_0070971).gsea.pdf › Source data/1.RNA-Seq source data/2.HUVECs/result/1.6.GSEA/S-vs-C/go/CC/364_endoplasmic reticulum exit site(GO_0070971).gsea.pdf]

endoplasmic reticulum exit site(GO:0070971)  
Heatmap of the Analyzed GeneSet

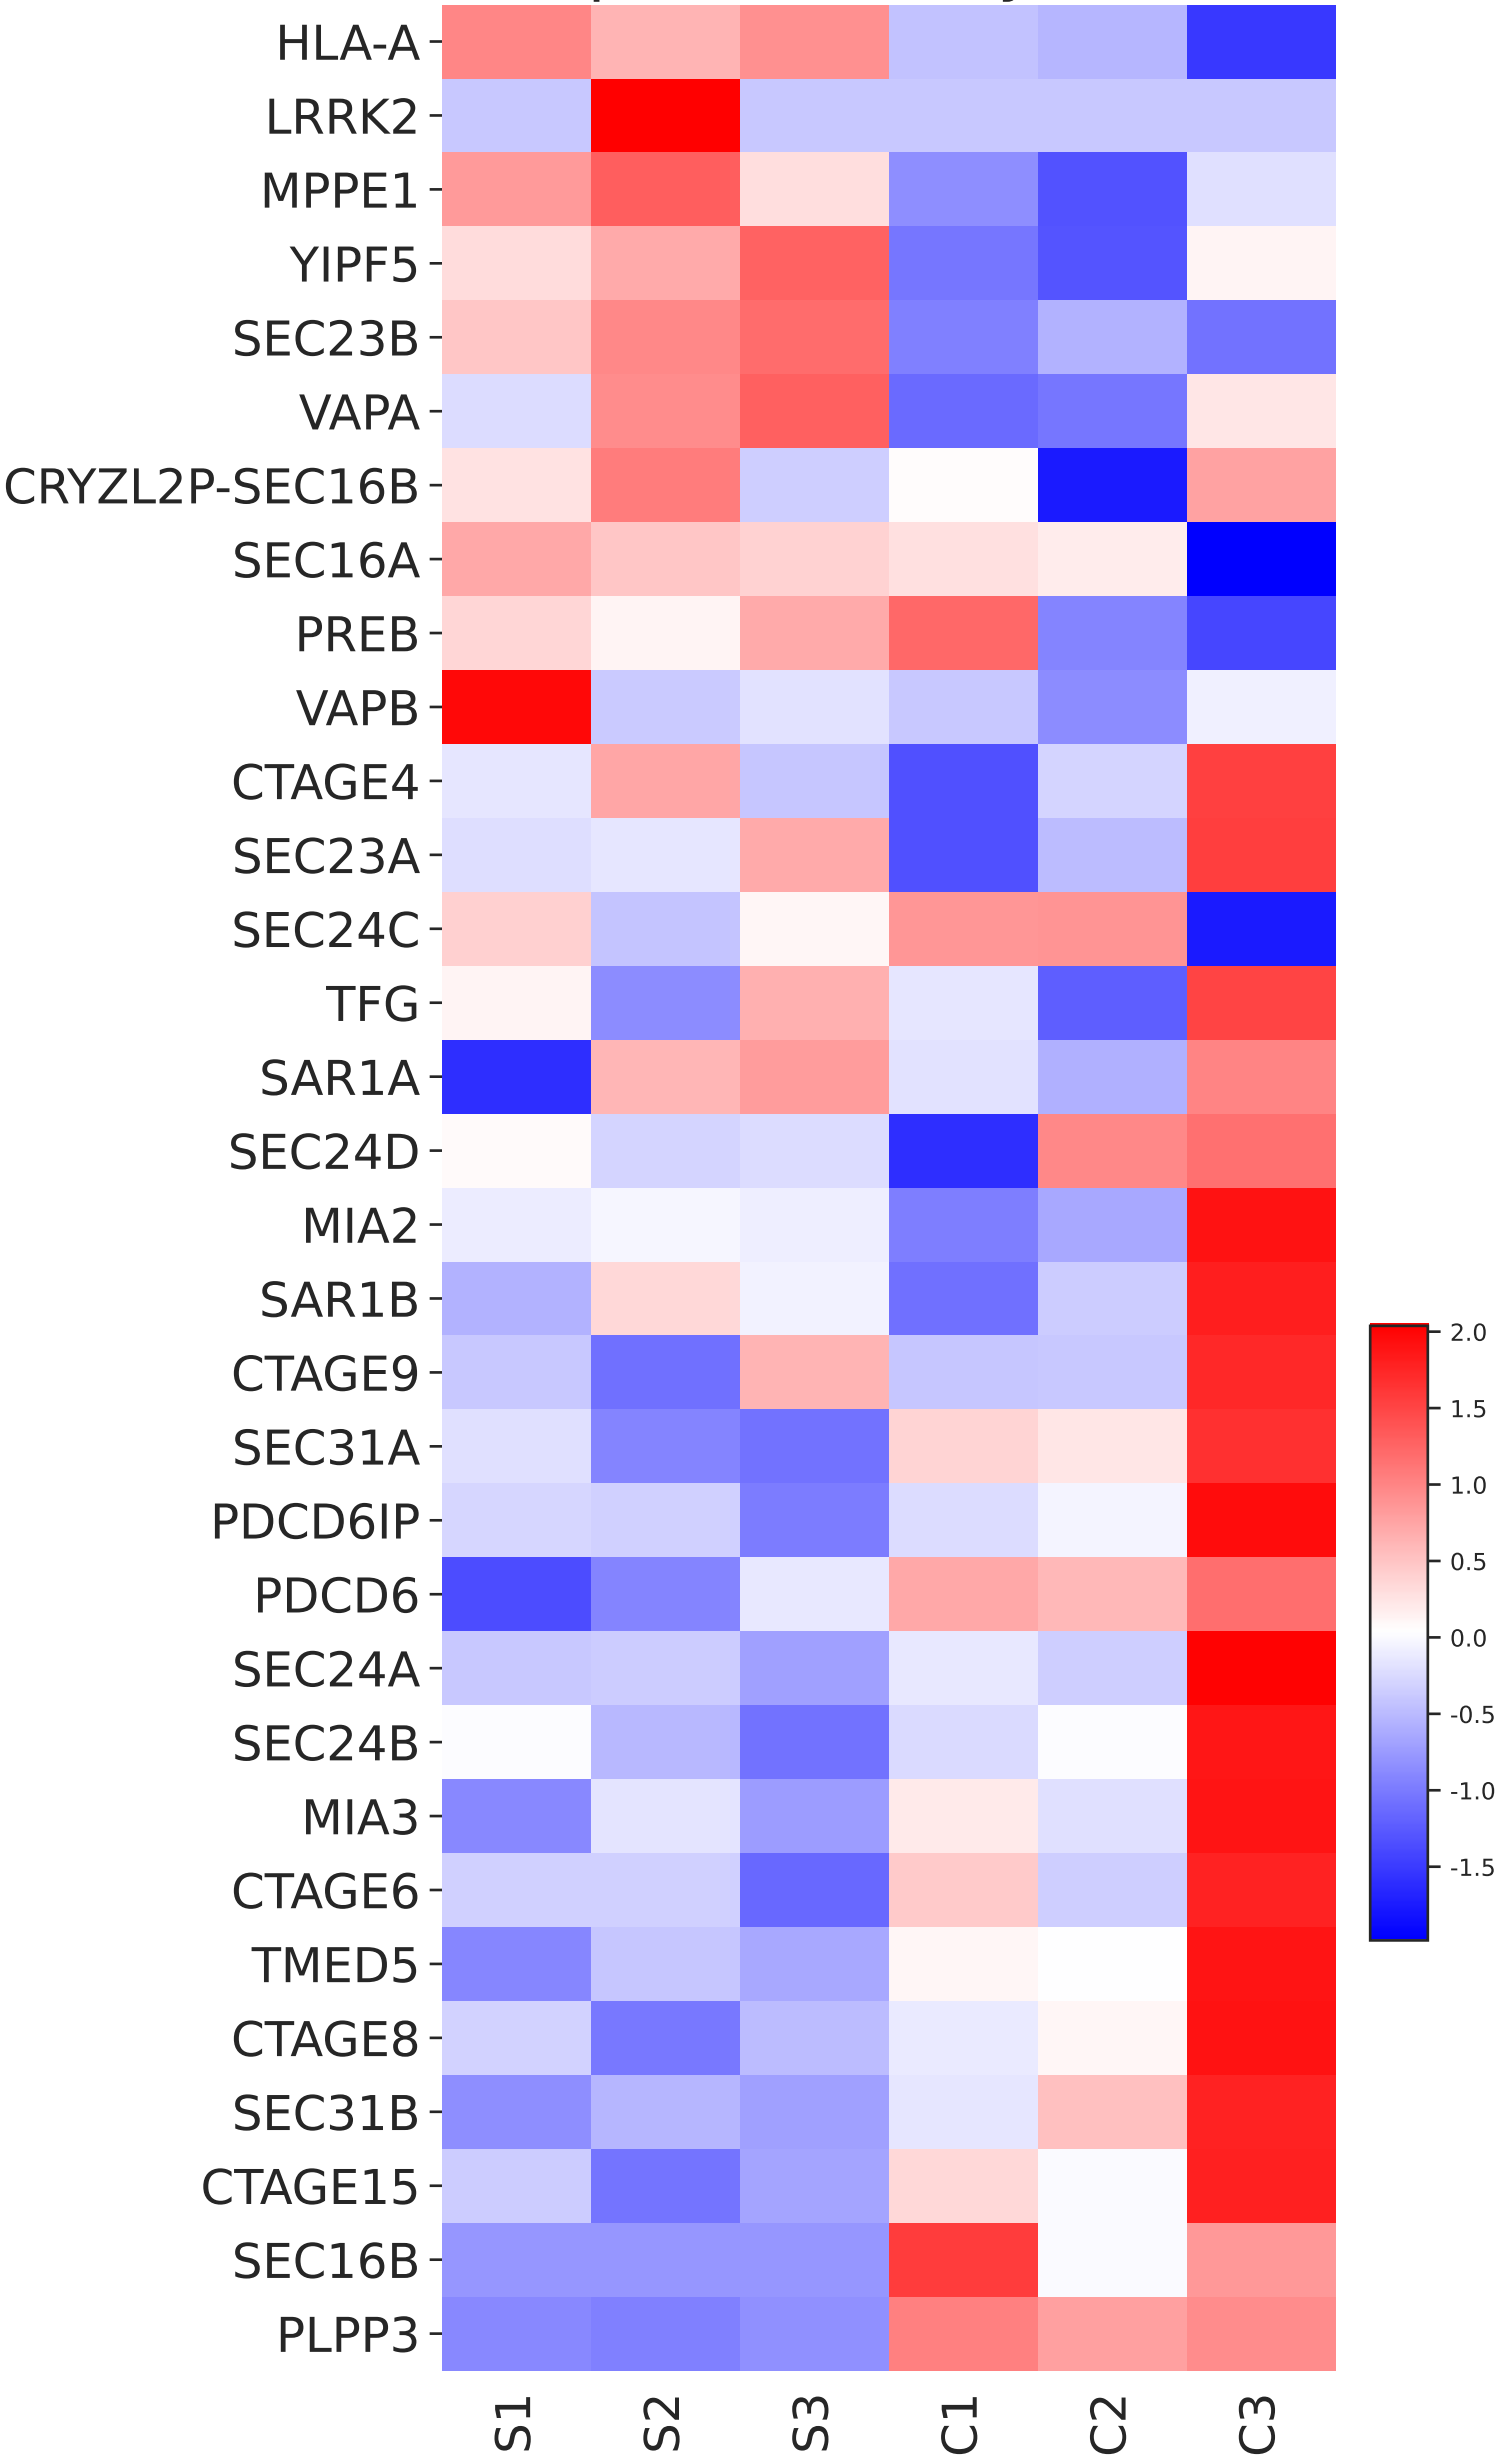

Supplement: Supplementary file 358 [file 364_endoplasmic reticulum exit site(GO_0070971).heatmap.pdf › Source data/1.RNA-Seq source data/2.HUVECs/result/1.6.GSEA/S-vs-C/go/CC/364_endoplasmic reticulum exit site(GO_0070971).heatmap.pdf]

# histone acetyltransferase complex(GO:0000123)

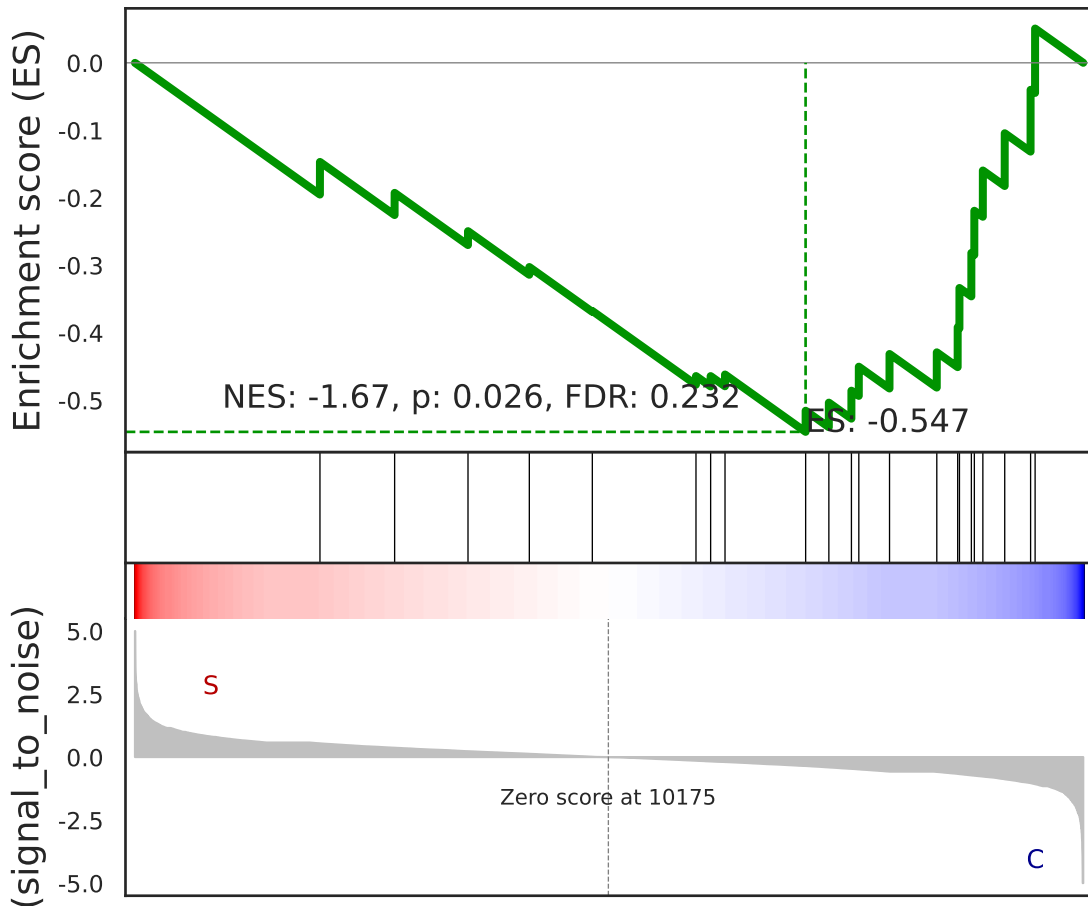

Supplement: Supplementary file 359 [file 365_histone acetyltransferase complex(GO_0000123).gsea.pdf › Source data/1.RNA-Seq source data/2.HUVECs/result/1.6.GSEA/S-vs-C/go/CC/365_histone acetyltransferase complex(GO_0000123).gsea.pdf]

histone acetyltransferase complex(GO:0000123)

Heatmap of the Analyzed GeneSet

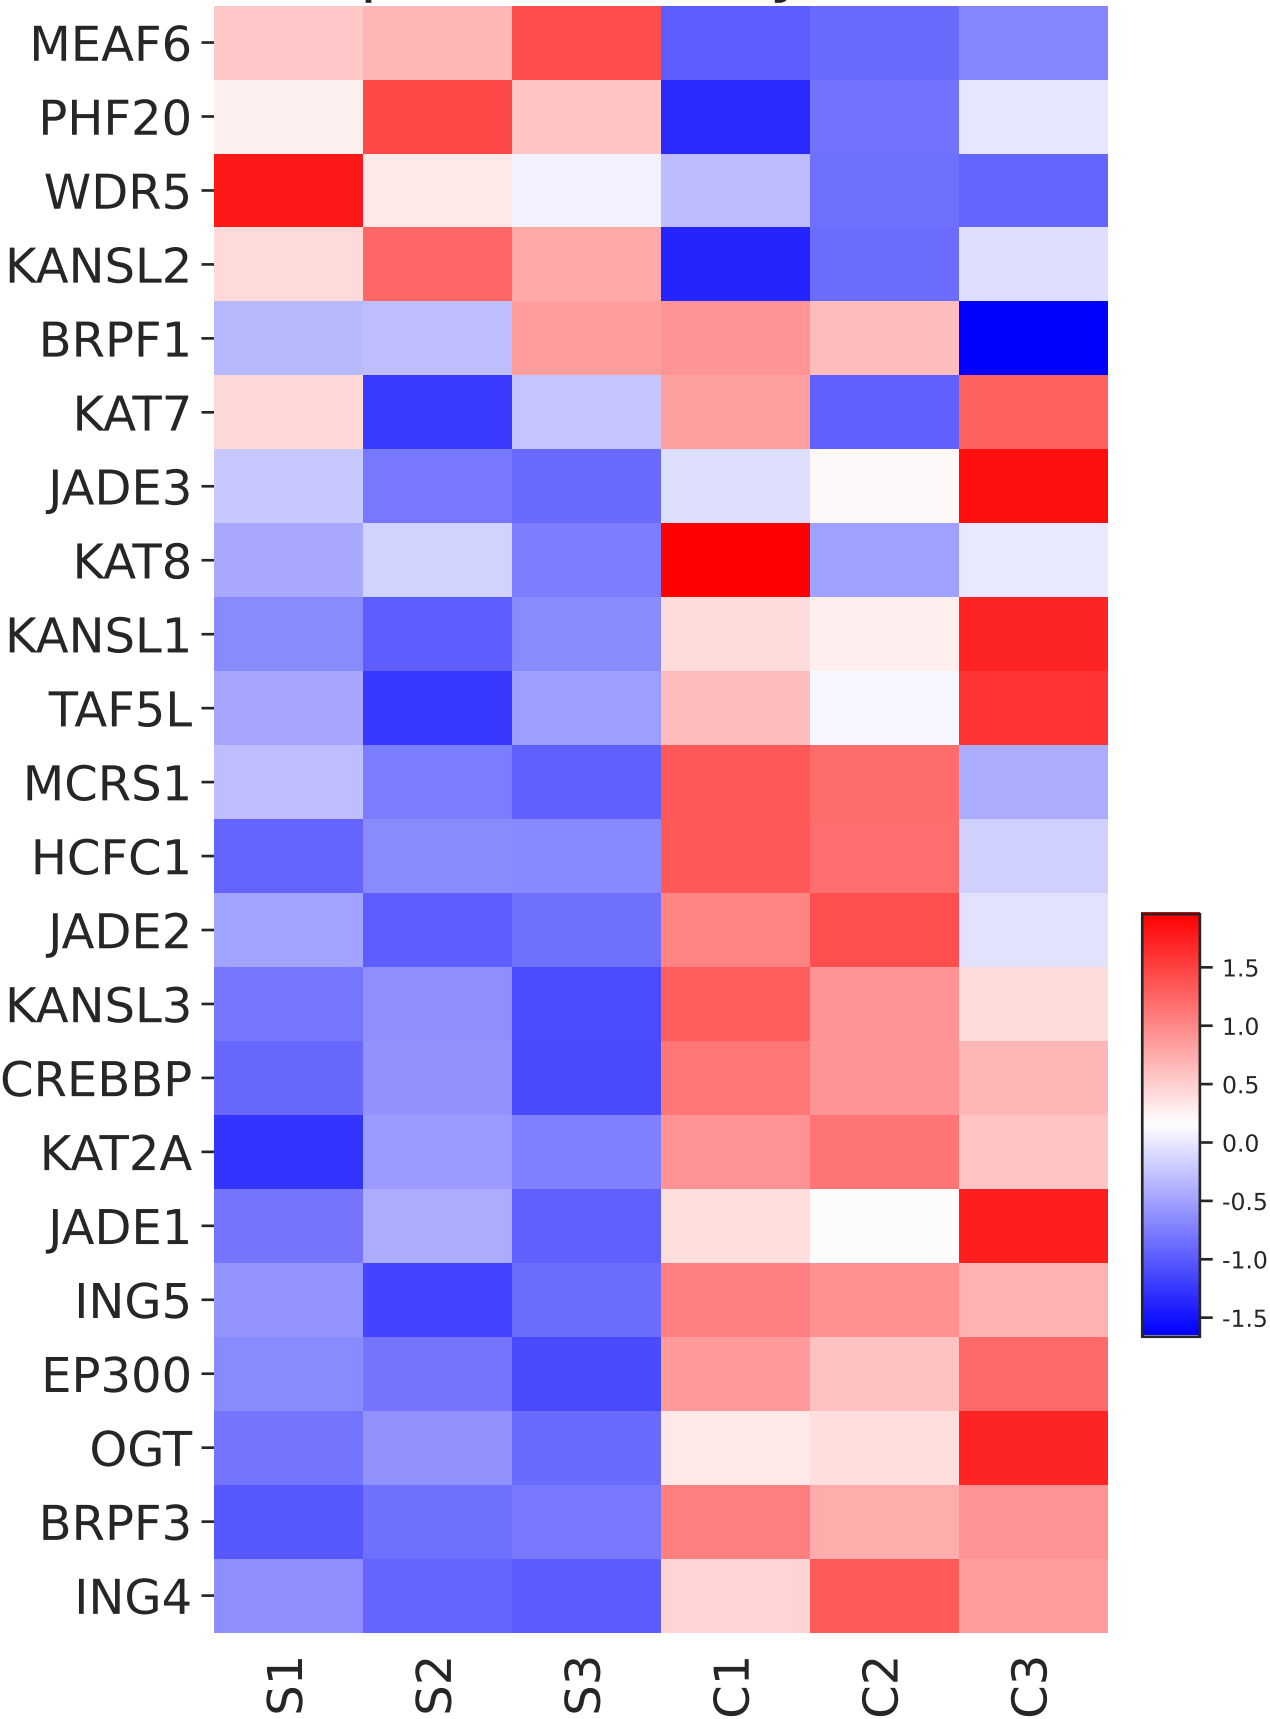

Supplement: Supplementary file 360 [file 365_histone acetyltransferase complex(GO_0000123).heatmap.pdf › Source data/1.RNA-Seq source data/2.HUVECs/result/1.6.GSEA/S-vs-C/go/CC/365_histone acetyltransferase complex(GO_0000123).heatmap.pdf]

# CENP-A containing nucleosome(GO:0043505)

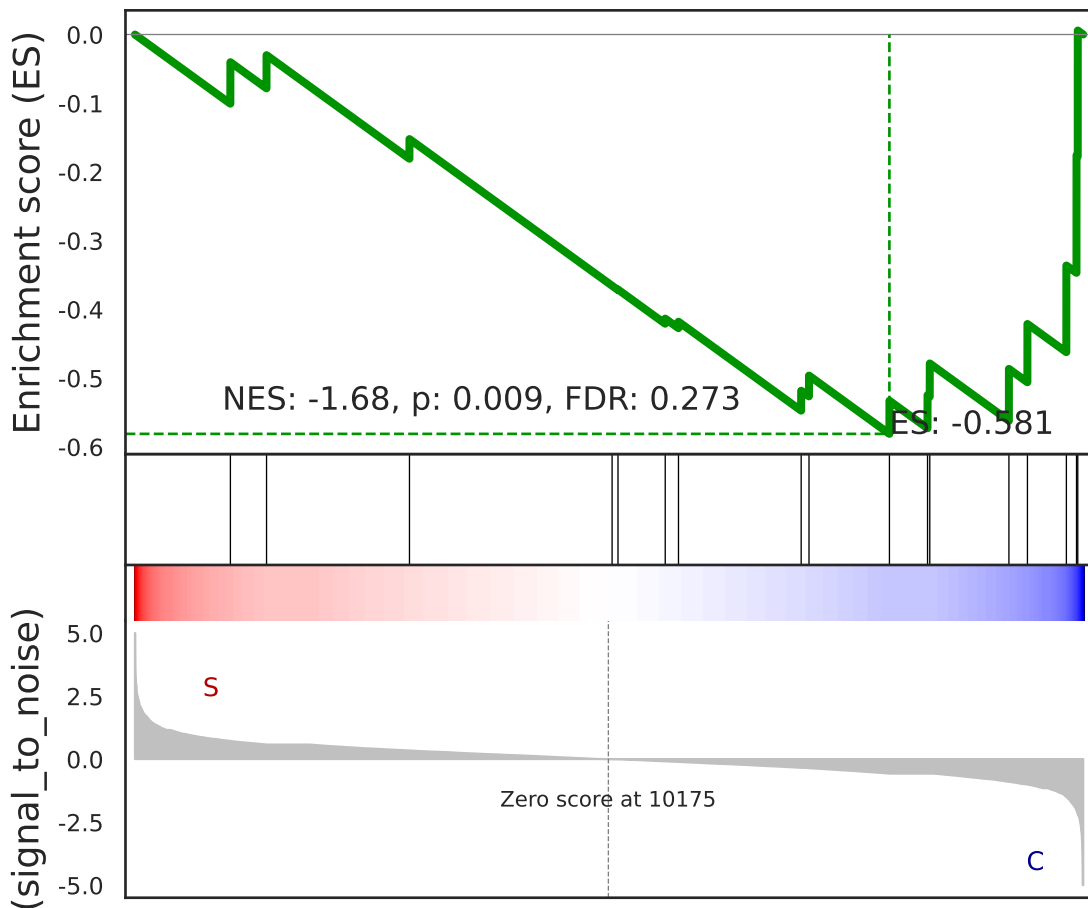

Supplement: Supplementary file 361 [file 366_CENP-A containing nucleosome(GO_0043505).gsea.pdf › Source data/1.RNA-Seq source data/2.HUVECs/result/1.6.GSEA/S-vs-C/go/CC/366_CENP-A containing nucleosome(GO_0043505).gsea.pdf]

# CENP-A containing nucleosome(GO:0043505)

## Heatmap of the Analyzed GeneSet

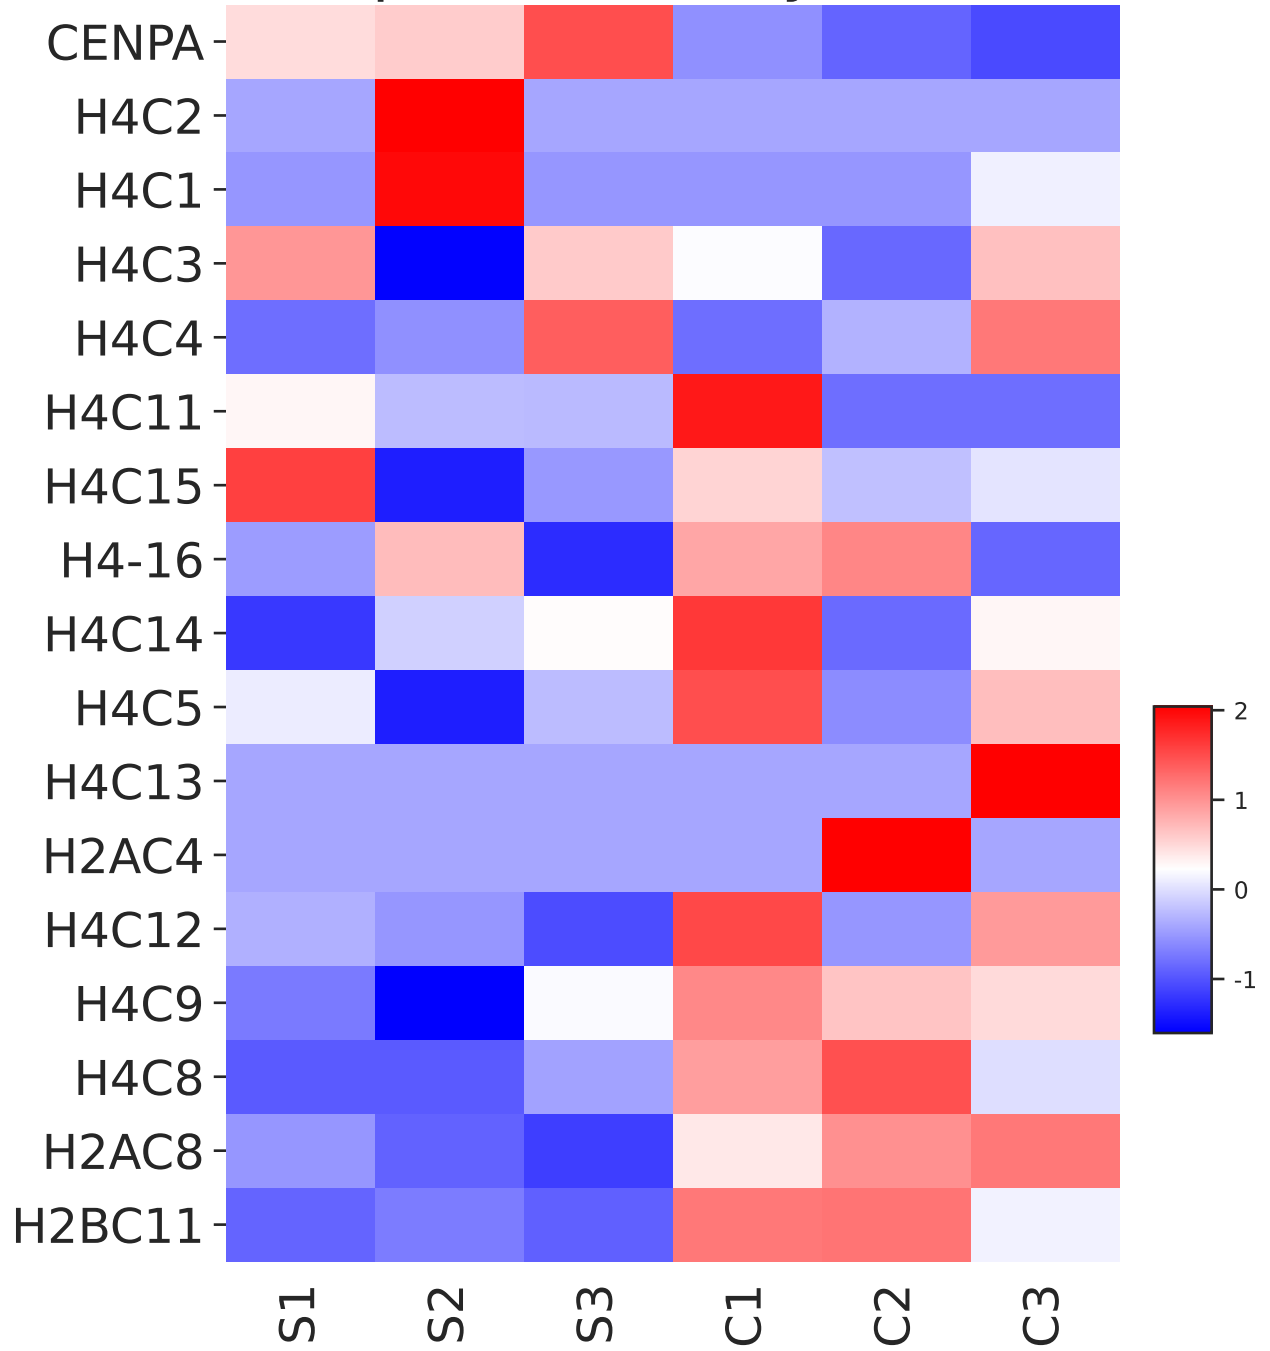

Supplement: Supplementary file 362 [file 366_CENP-A containing nucleosome(GO_0043505).heatmap.pdf › Source data/1.RNA-Seq source data/2.HUVECs/result/1.6.GSEA/S-vs-C/go/CC/366_CENP-A containing nucleosome(GO_0043505).heatmap.pdf]

# RISC complex(GO:0016442)

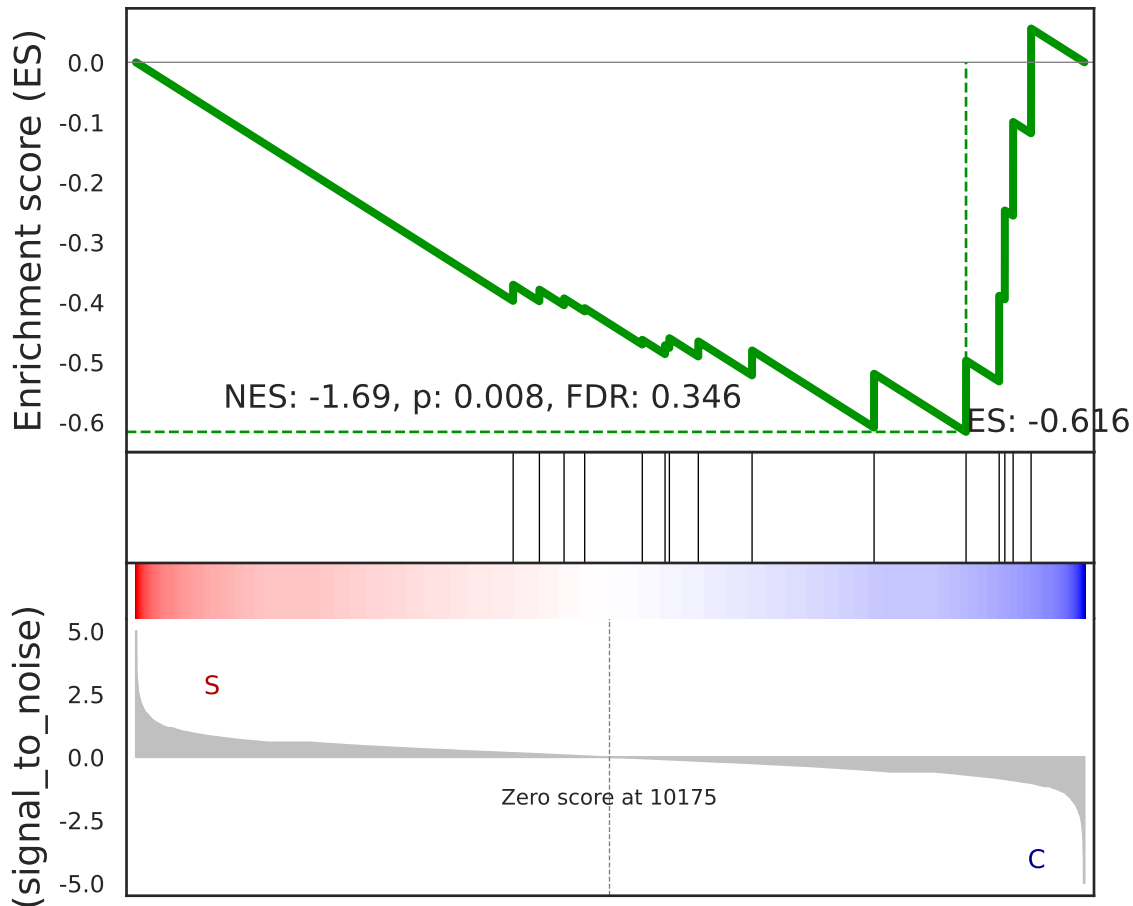

Supplement: Supplementary file 363 [file 367_RISC complex(GO_0016442).gsea.pdf › Source data/1.RNA-Seq source data/2.HUVECs/result/1.6.GSEA/S-vs-C/go/CC/367_RISC complex(GO_0016442).gsea.pdf]

# RISC complex(GO:0016442)

## Heatmap of the Analyzed GeneSet

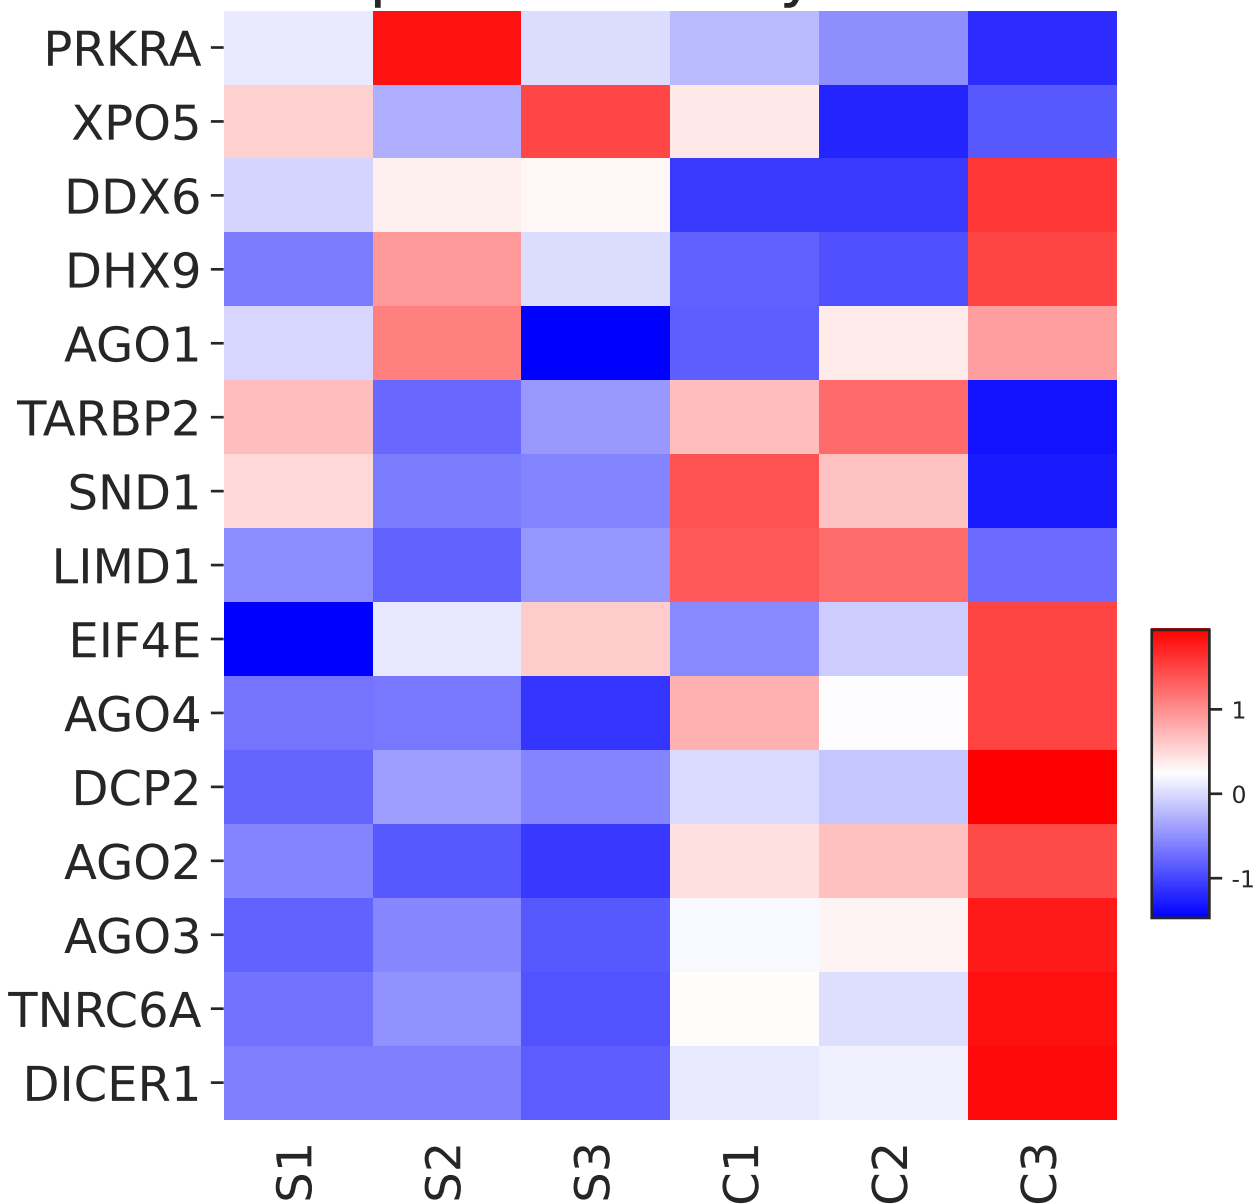

Supplement: Supplementary file 364 [file 367_RISC complex(GO_0016442).heatmap.pdf › Source data/1.RNA-Seq source data/2.HUVECs/result/1.6.GSEA/S-vs-C/go/CC/367_RISC complex(GO_0016442).heatmap.pdf]

# nucleosome(GO:0000786)

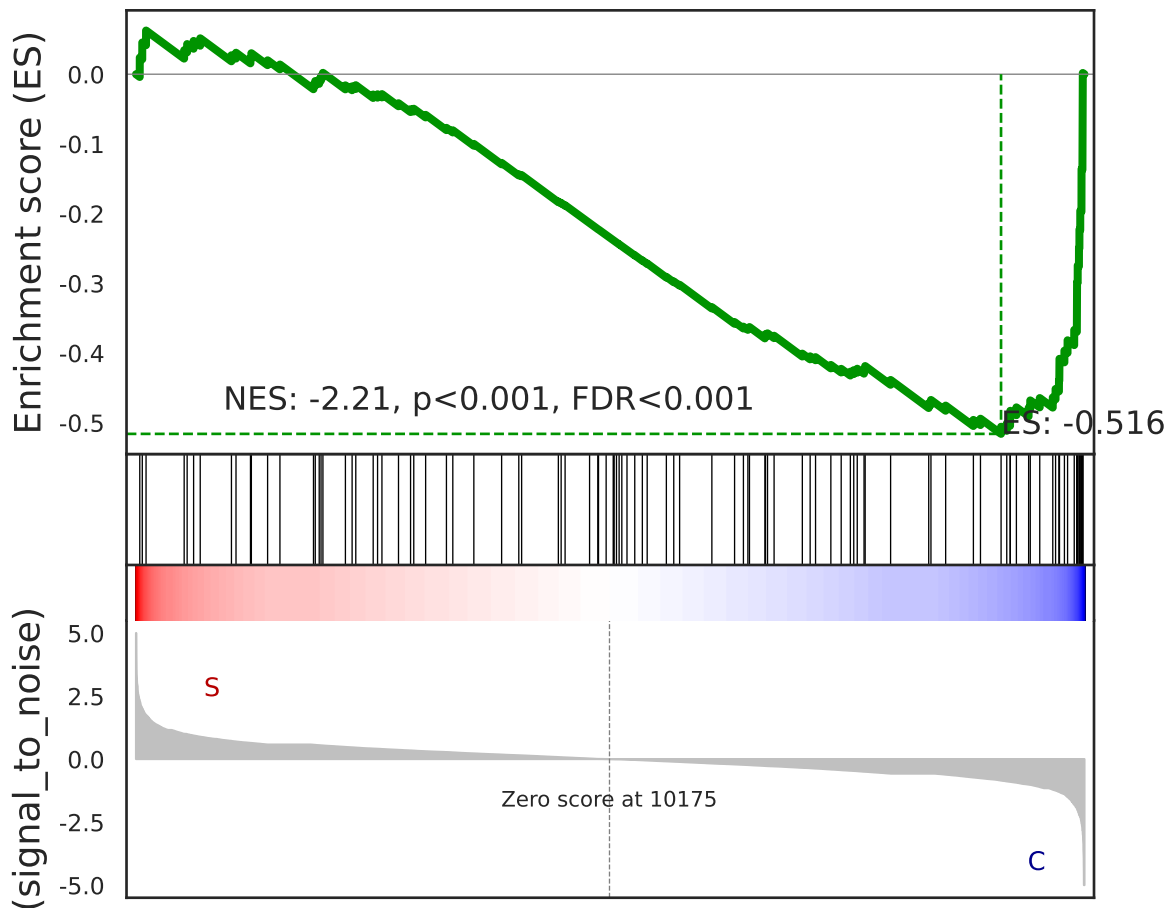

Supplement: Supplementary file 365 [file 368_nucleosome(GO_0000786).gsea.pdf › Source data/1.RNA-Seq source data/2.HUVECs/result/1.6.GSEA/S-vs-C/go/CC/368_nucleosome(GO_0000786).gsea.pdf]

nucleosome(GO:0000786)

Heatmap of the Analyzed GeneSet

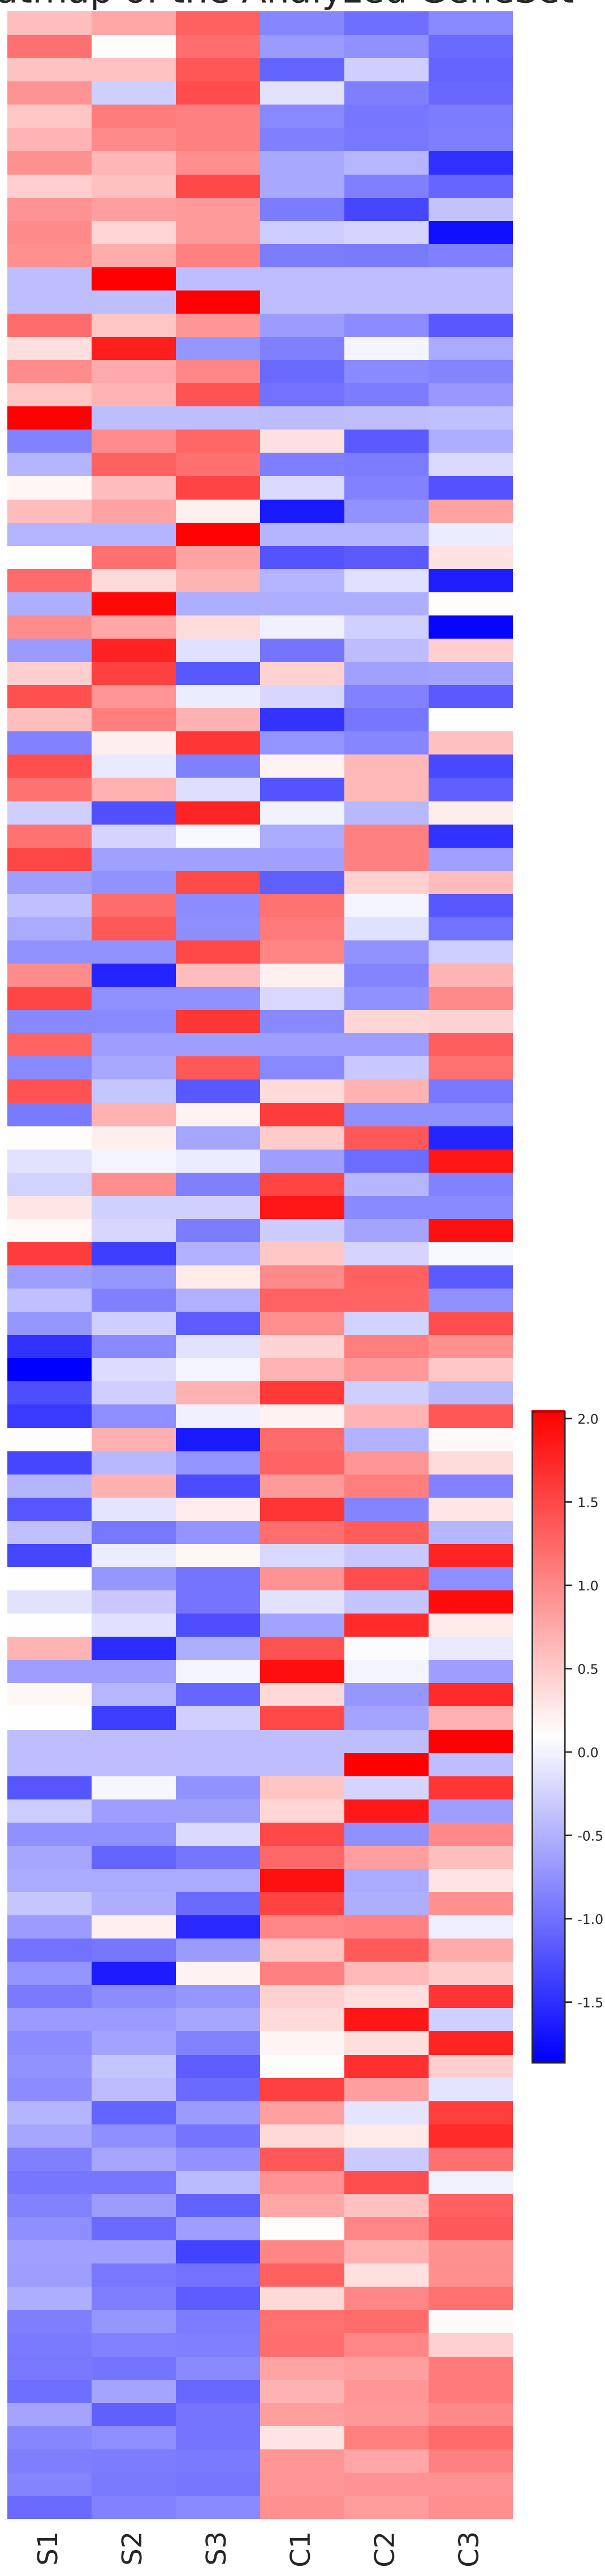

Supplement: Supplementary file 366 [file 368_nucleosome(GO_0000786).heatmap.pdf › Source data/1.RNA-Seq source data/2.HUVECs/result/1.6.GSEA/S-vs-C/go/CC/368_nucleosome(GO_0000786).heatmap.pdf]

# cytosolic small ribosomal subunit(GO:0022627)

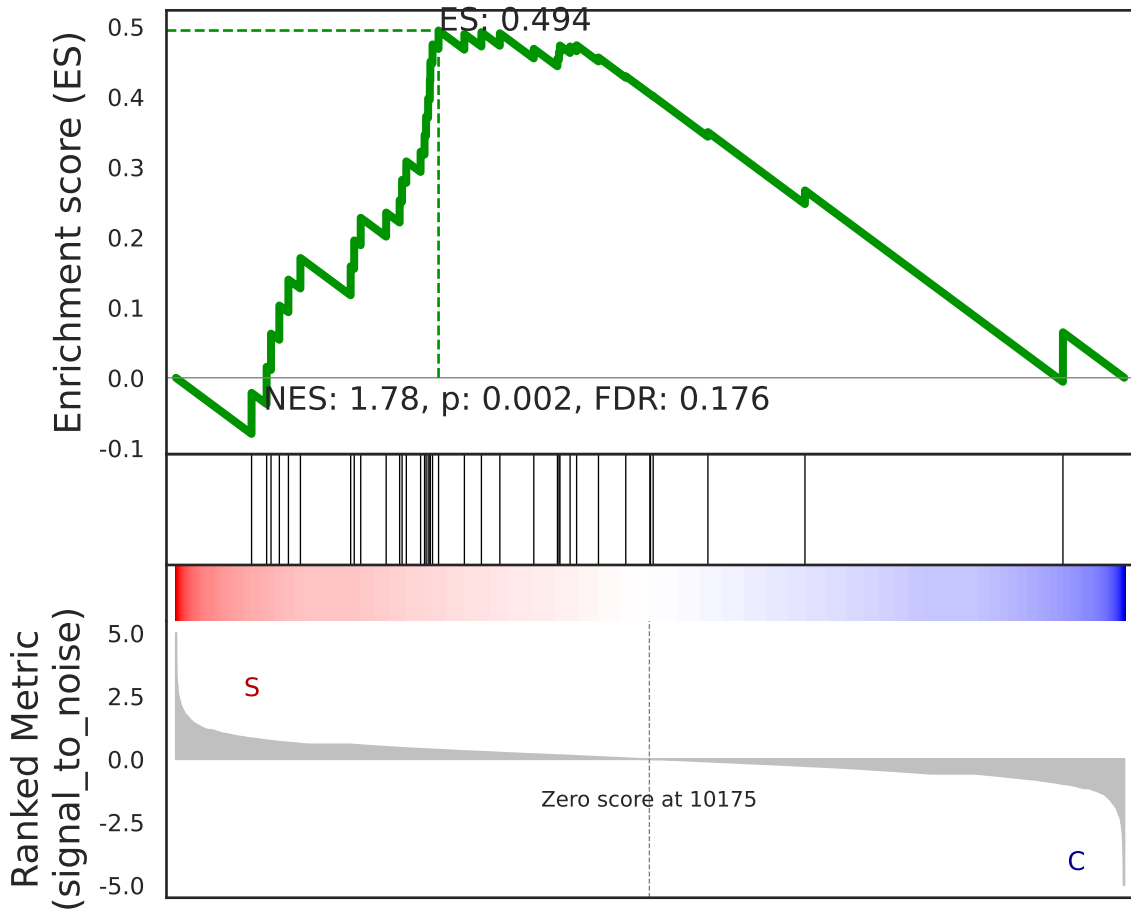

Supplement: Supplementary file 367 [file 3_cytosolic small ribosomal subunit(GO_0022627).gsea.pdf › Source data/1.RNA-Seq source data/2.HUVECs/result/1.6.GSEA/S-vs-C/go/CC/3_cytosolic small ribosomal subunit(GO_0022627).gsea.pdf]

cytosolic small ribosomal subunit(GO:0022627)  
Heatmap of the Analyzed GeneSet

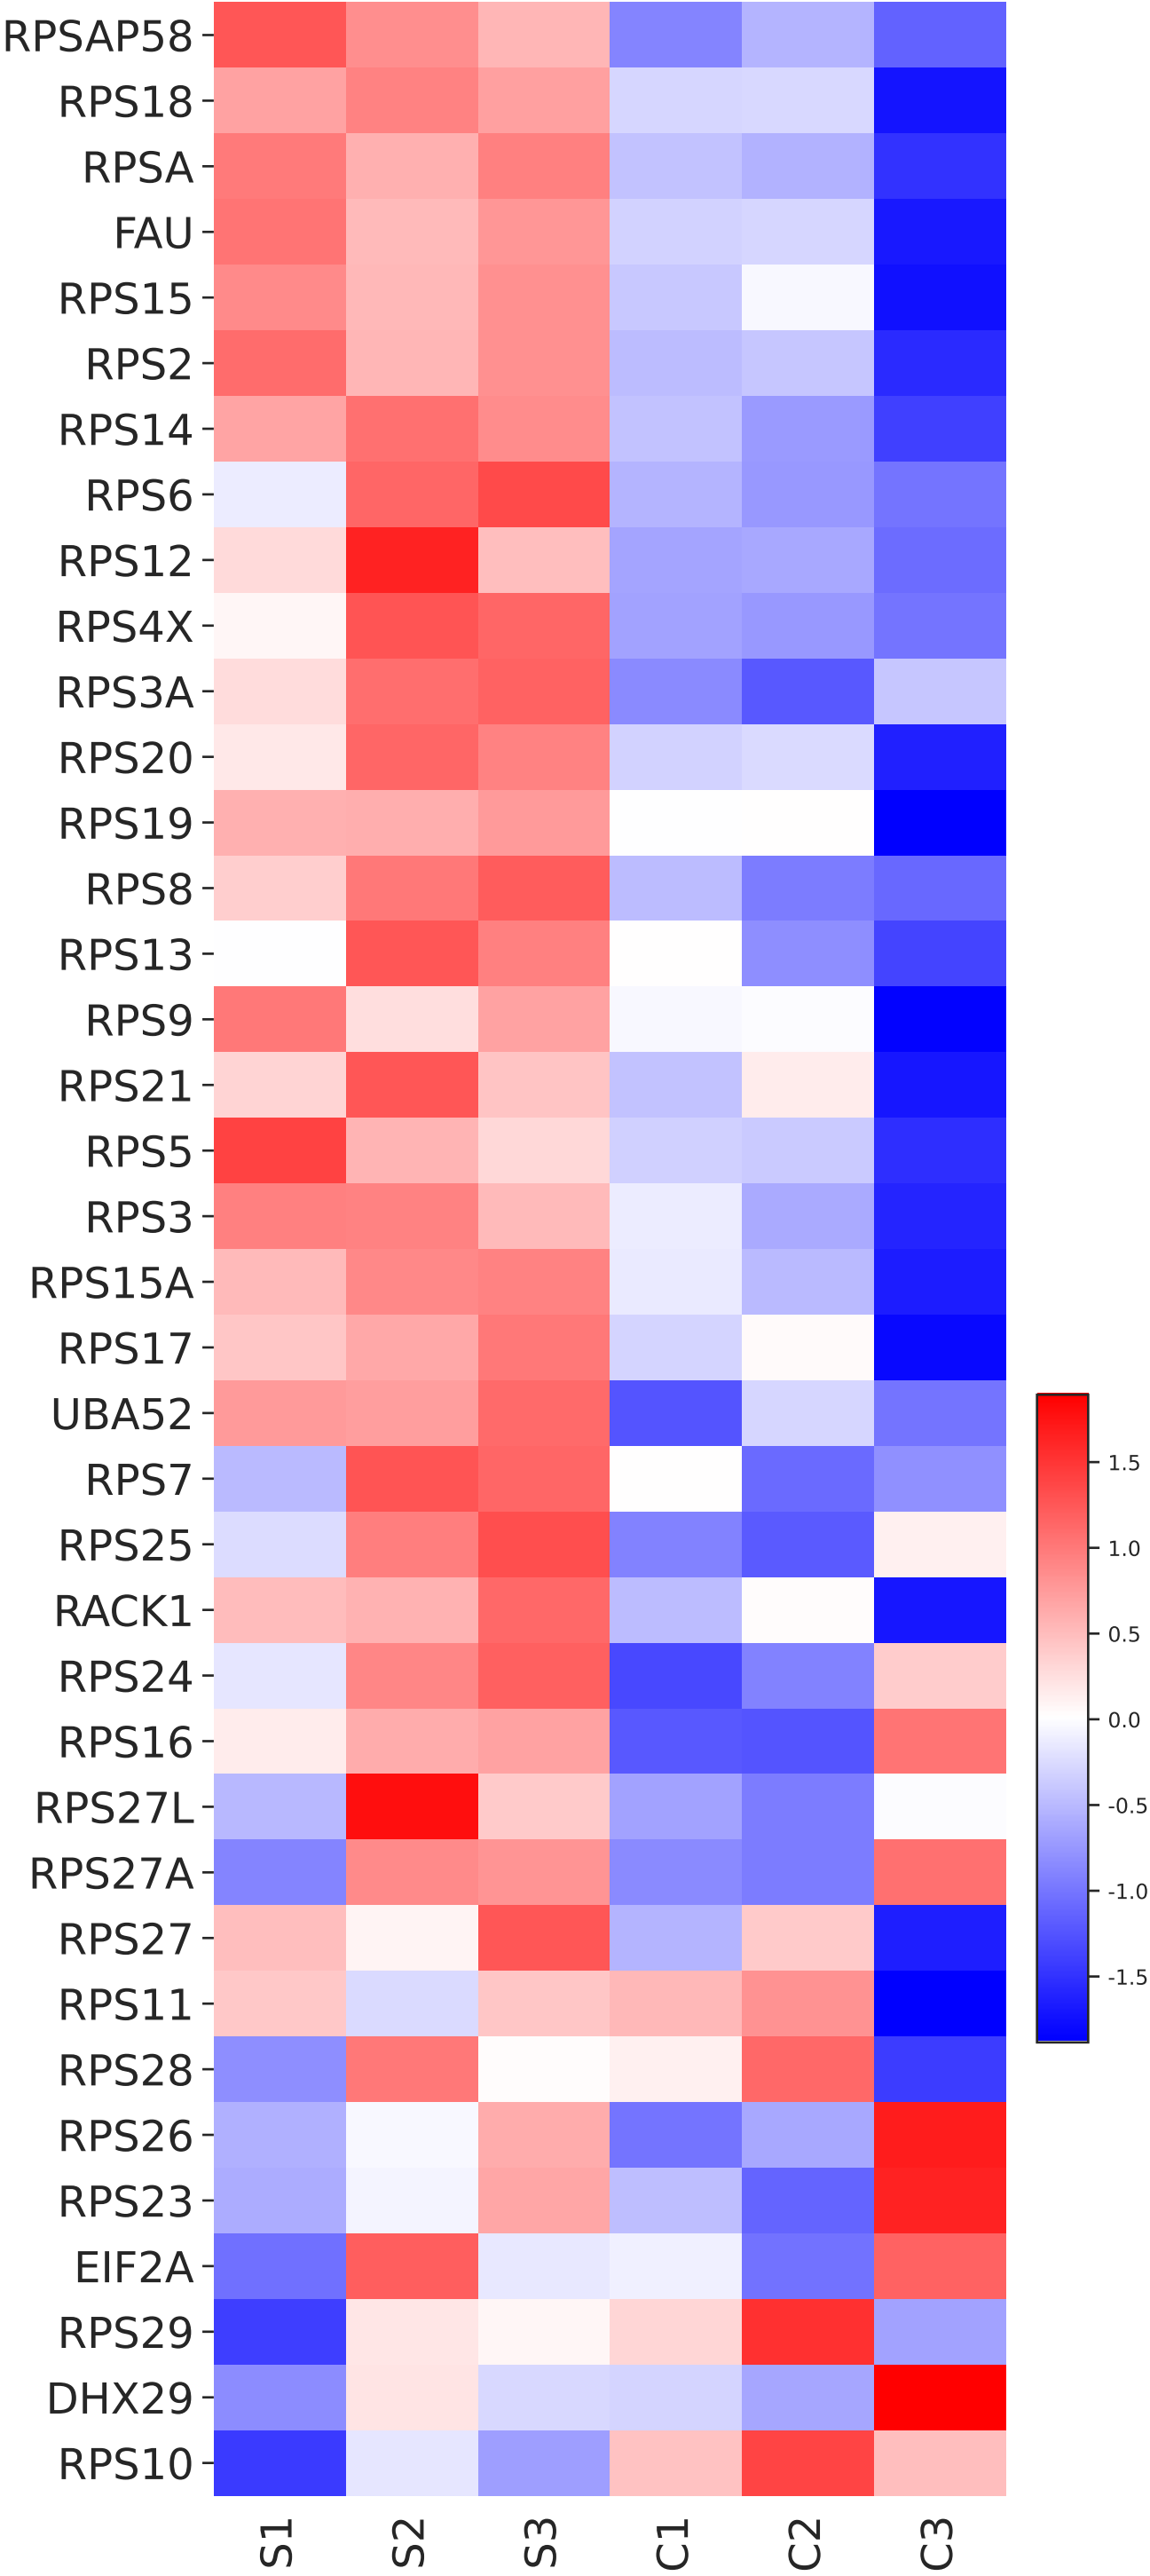

Supplement: Supplementary file 368 [file 3_cytosolic small ribosomal subunit(GO_0022627).heatmap.pdf › Source data/1.RNA-Seq source data/2.HUVECs/result/1.6.GSEA/S-vs-C/go/CC/3_cytosolic small ribosomal subunit(GO_0022627).heatmap.pdf]

TIM23 mitochondrial import inner membrane translocase com...(GO:0005744)

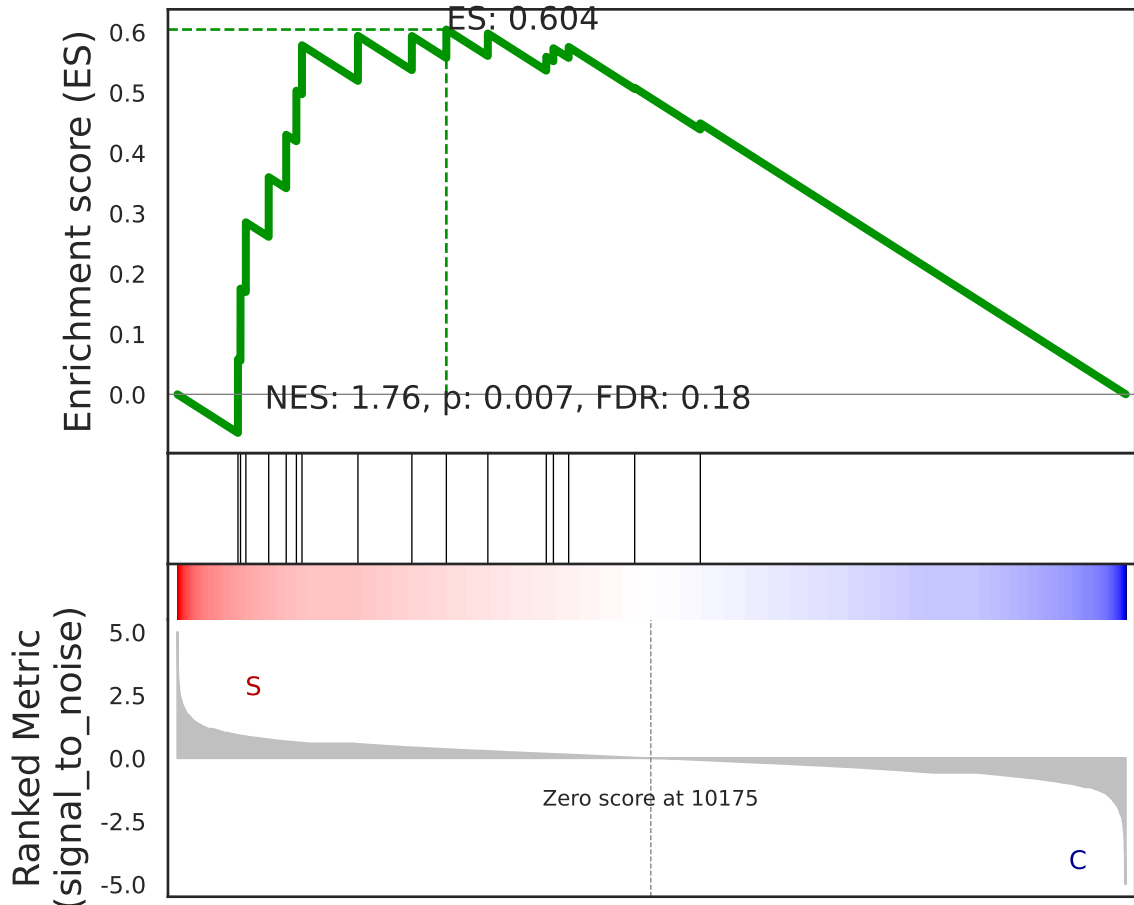

Supplement: Supplementary file 369 [file 4_TIM23 mitochondrial import inner membrane translocase com...(GO_0005744).gsea.pdf › Source data/1.RNA-Seq source data/2.HUVECs/result/1.6.GSEA/S-vs-C/go/CC/4_TIM23 mitochondrial import inner membrane translocase com...(GO_0005744).gsea.pdf]

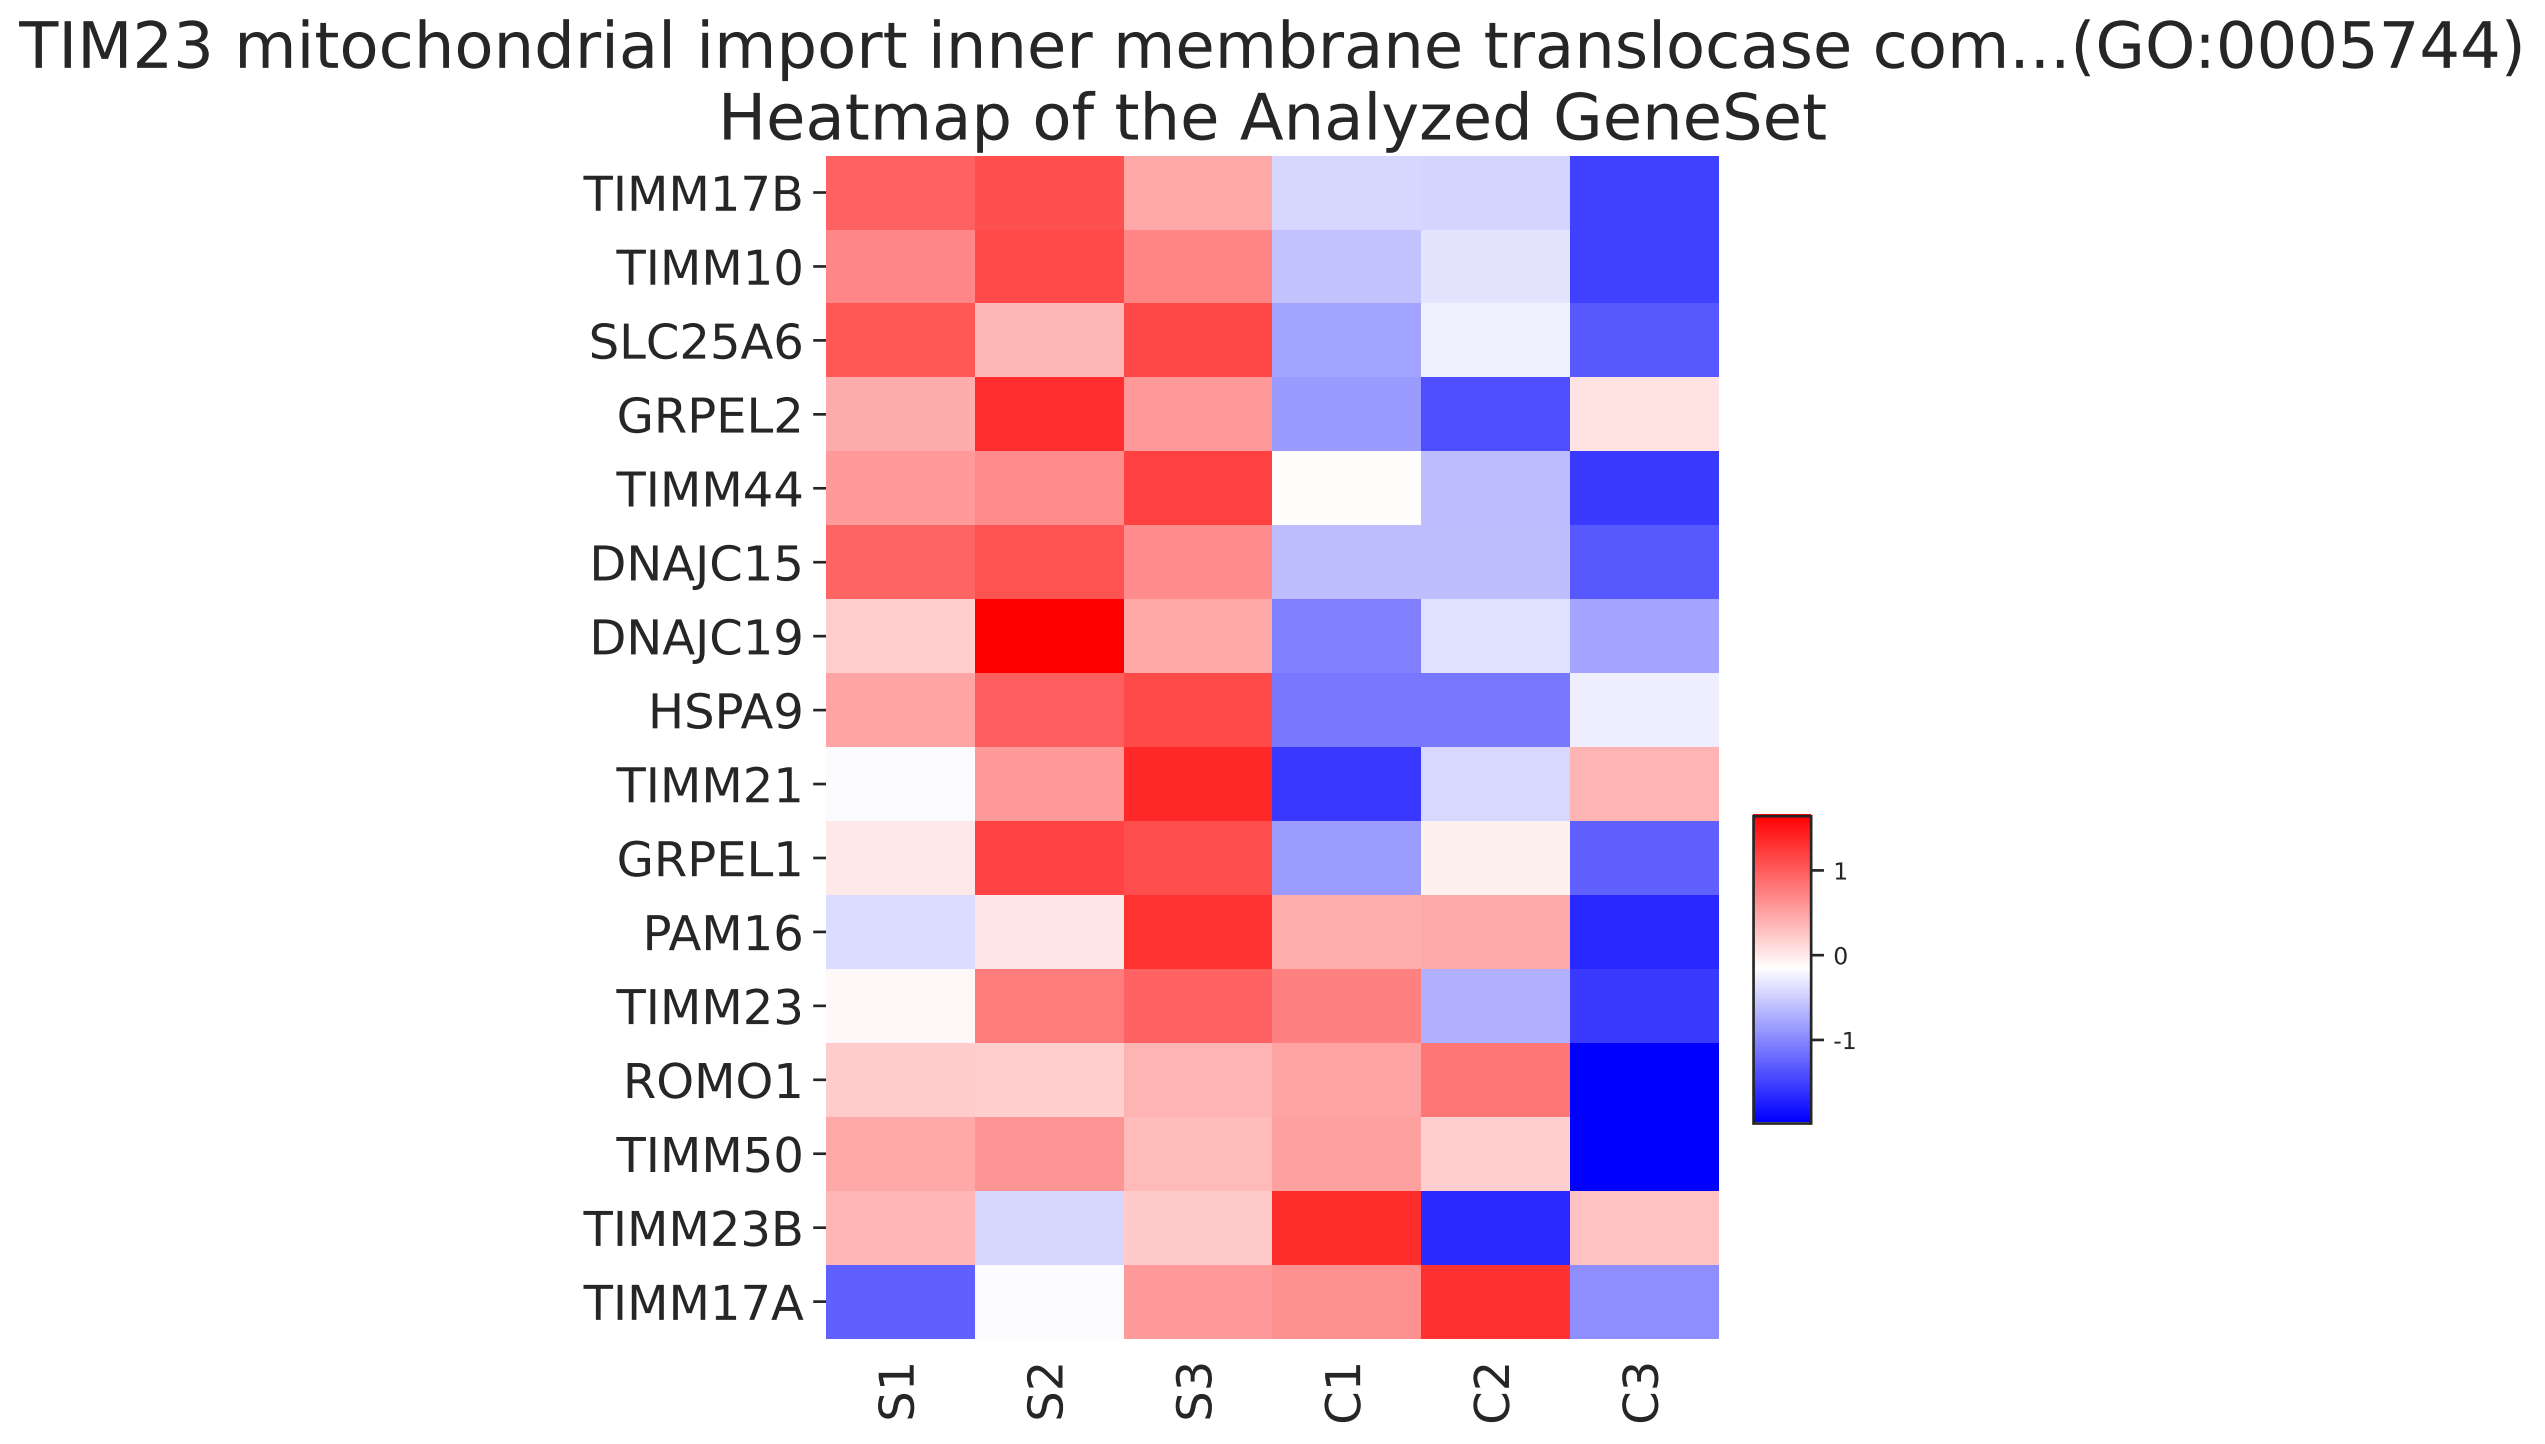

Supplement: Supplementary file 370 [file 4_TIM23 mitochondrial import inner membrane translocase com...(GO_0005744).heatmap.pdf › Source data/1.RNA-Seq source data/2.HUVECs/result/1.6.GSEA/S-vs-C/go/CC/4_TIM23 mitochondrial import inner membrane translocase com...(GO_0005744).heatmap.pdf]

# manchette(GO:0002177)

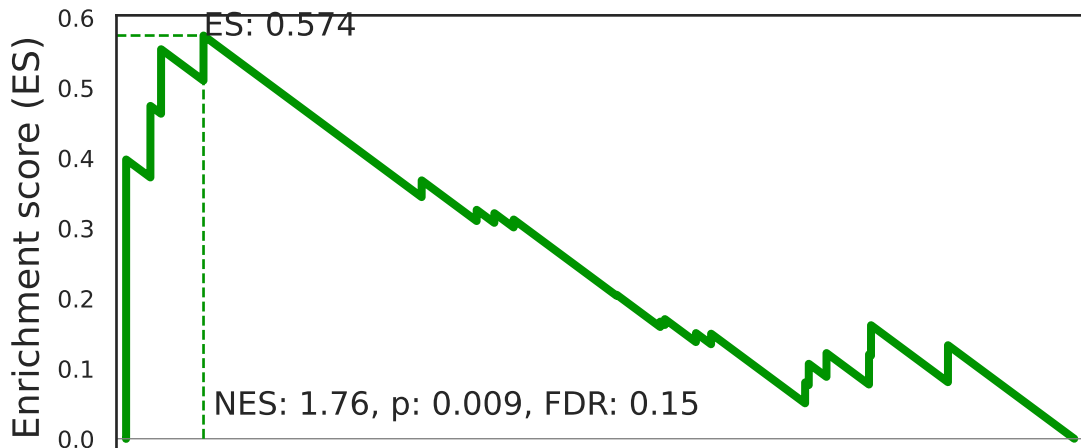

Ranked Metric  
(signal\_to\_noise)

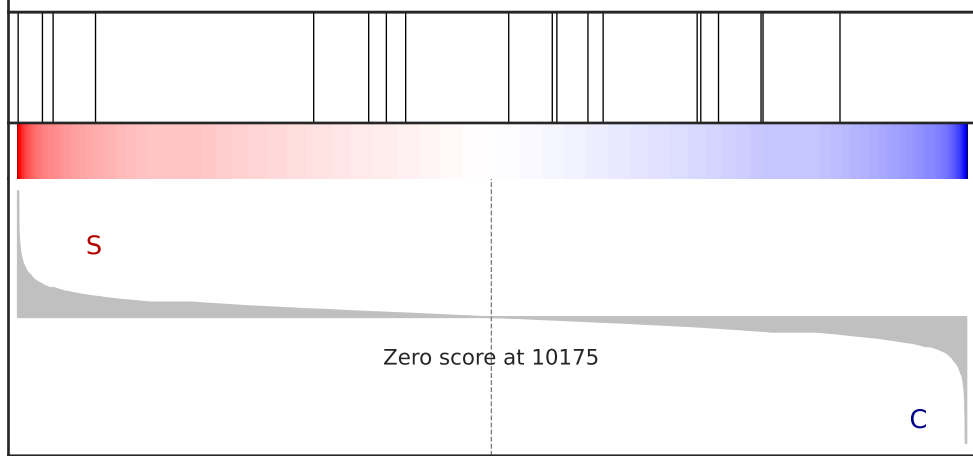

Supplement: Supplementary file 371 [file 5_manchette(GO_0002177).gsea.pdf › Source data/1.RNA-Seq source data/2.HUVECs/result/1.6.GSEA/S-vs-C/go/CC/5_manchette(GO_0002177).gsea.pdf]

manchette(GO:0002177)

# Heatmap of the Analyzed GeneSet

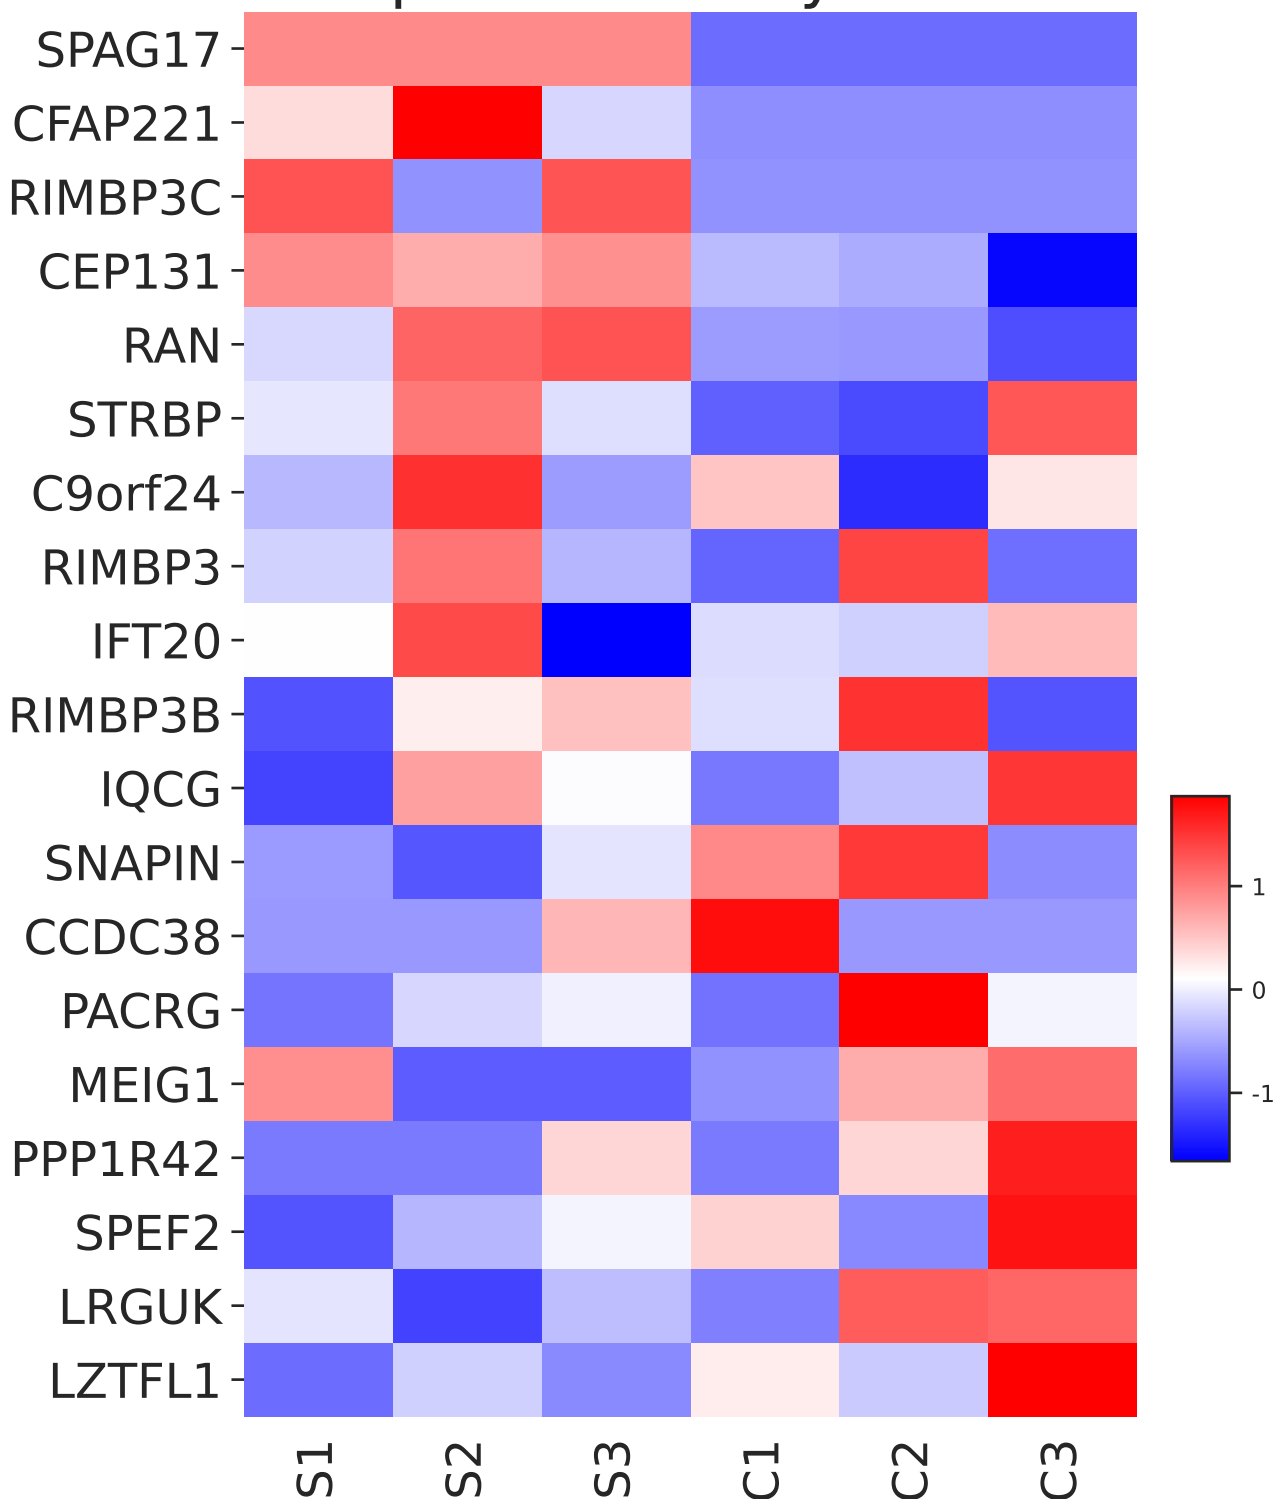

Supplement: Supplementary file 372 [file 5_manchette(GO_0002177).heatmap.pdf › Source data/1.RNA-Seq source data/2.HUVECs/result/1.6.GSEA/S-vs-C/go/CC/5_manchette(GO_0002177).heatmap.pdf]

# cytosolic ribosome(GO:0022626)

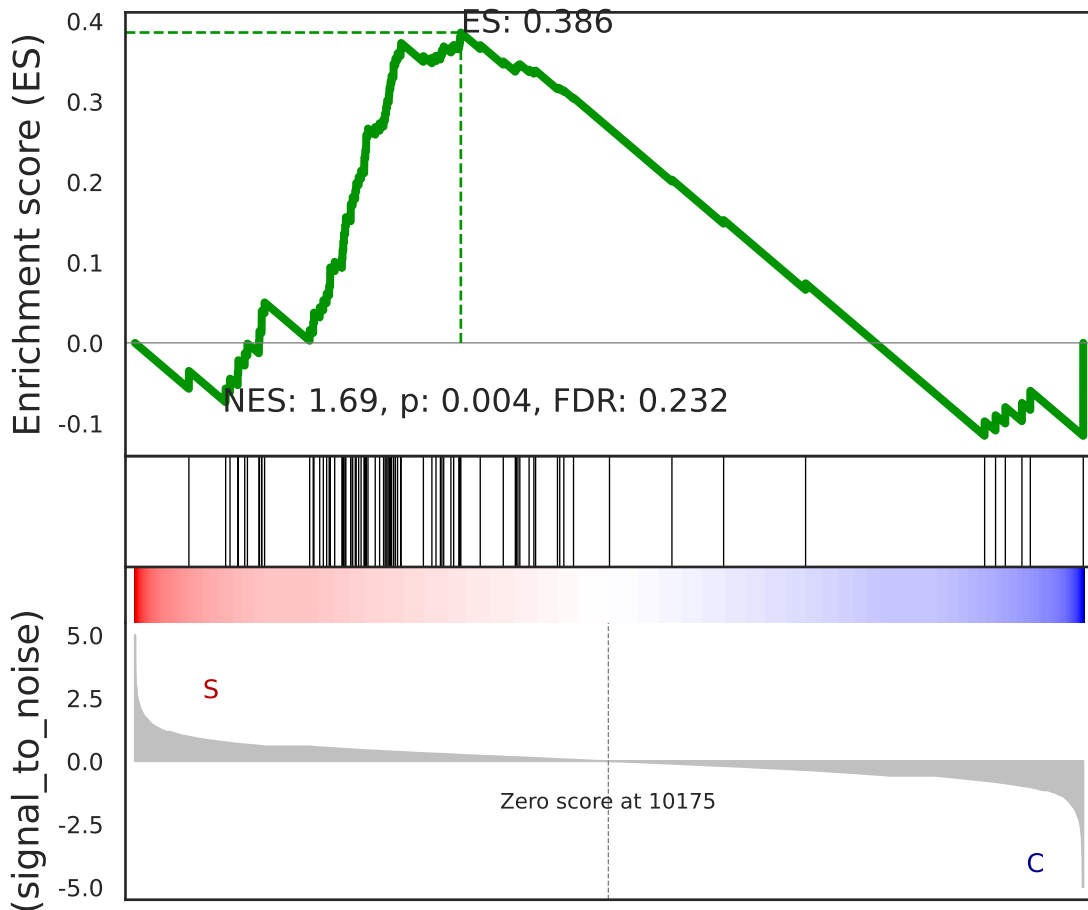

Supplement: Supplementary file 373 [file 6_cytosolic ribosome(GO_0022626).gsea.pdf › Source data/1.RNA-Seq source data/2.HUVECs/result/1.6.GSEA/S-vs-C/go/CC/6_cytosolic ribosome(GO_0022626).gsea.pdf]

cytosolic ribosome(GO:0022262)  
Heatmap of the Analyzed GeneSet

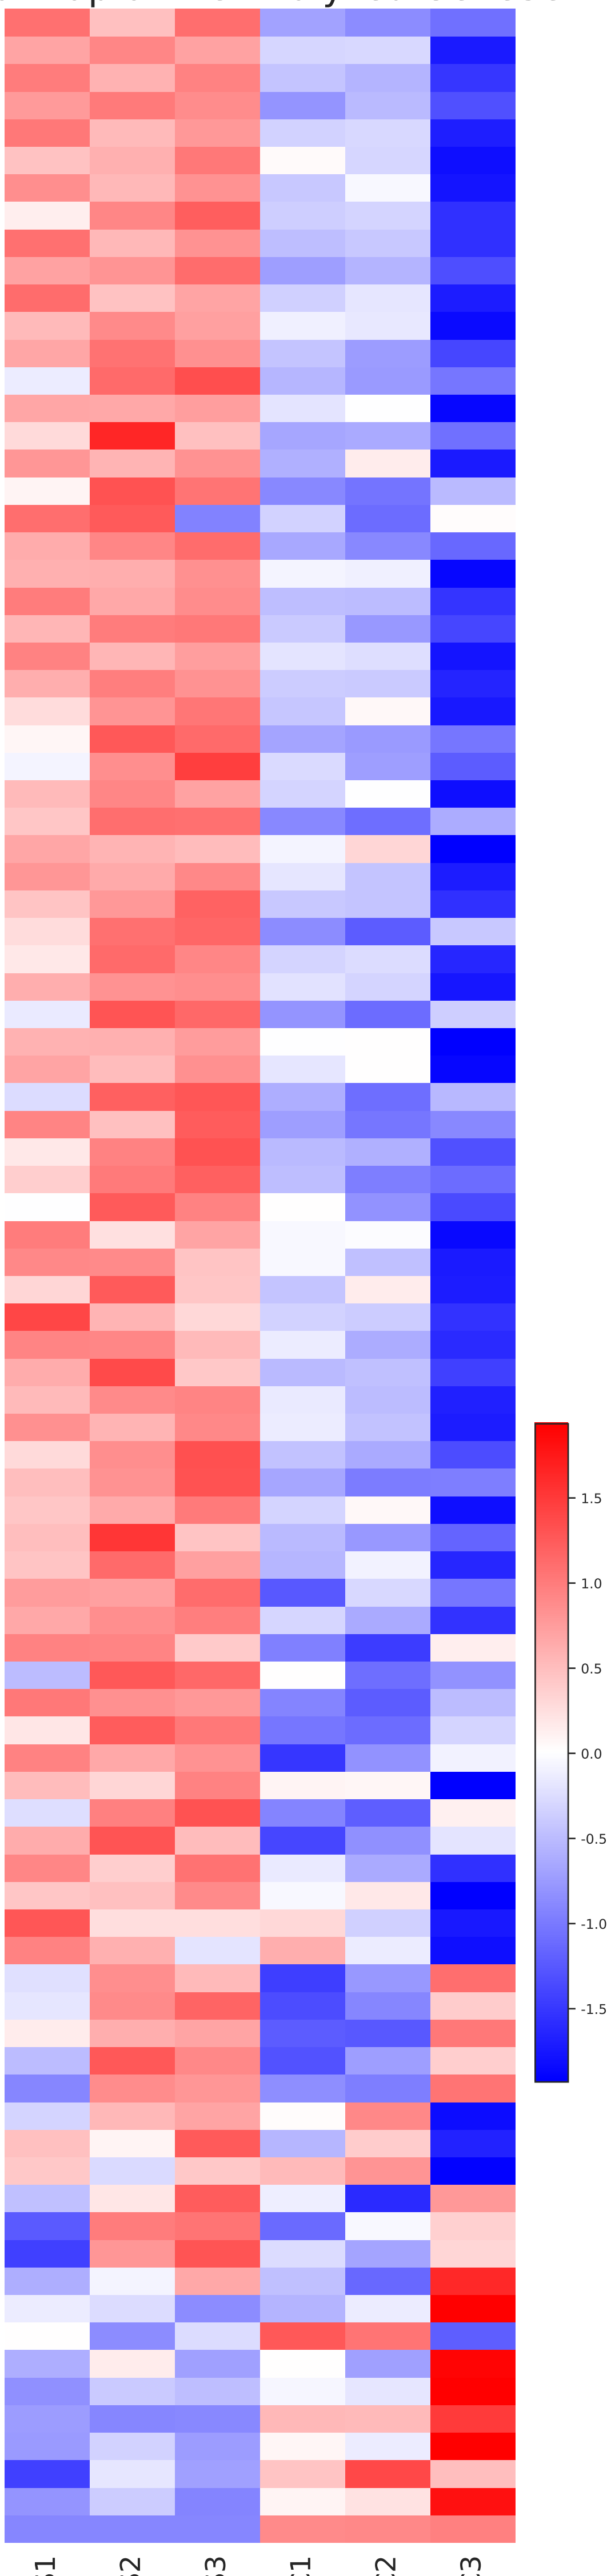

Supplement: Supplementary file 374 [file 6_cytosolic ribosome(GO_0022626).heatmap.pdf › Source data/1.RNA-Seq source data/2.HUVECs/result/1.6.GSEA/S-vs-C/go/CC/6_cytosolic ribosome(GO_0022626).heatmap.pdf]

# U4/U6 x U5 tri-snRNP complex(GO:0046540)

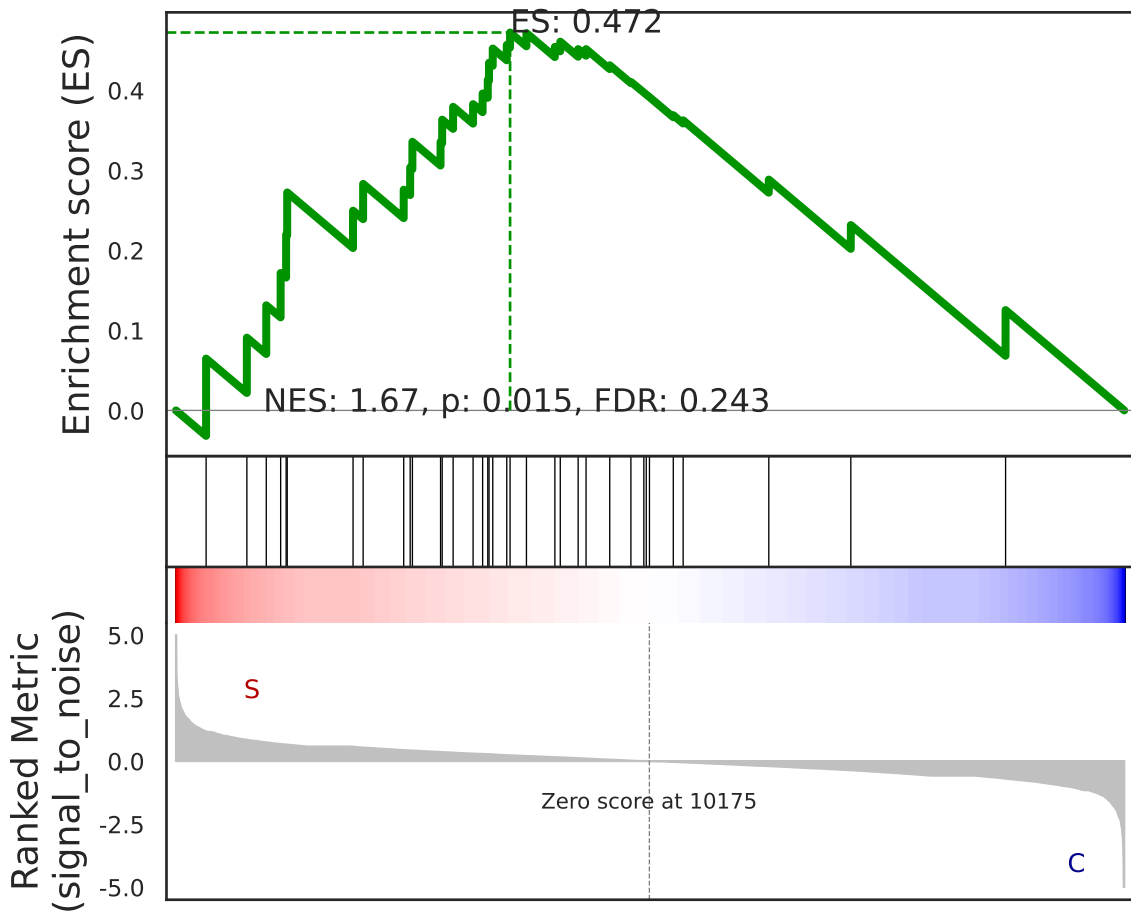

Supplement: Supplementary file 375 [file 7_U4_U6 x U5 tri-snRNP complex(GO_0046540).gsea.pdf › Source data/1.RNA-Seq source data/2.HUVECs/result/1.6.GSEA/S-vs-C/go/CC/7_U4_U6 x U5 tri-snRNP complex(GO_0046540).gsea.pdf]

U4/U6 x U5 tri-snRNP complex(GO:0046540)  
Heatmap of the Analyzed GeneSet

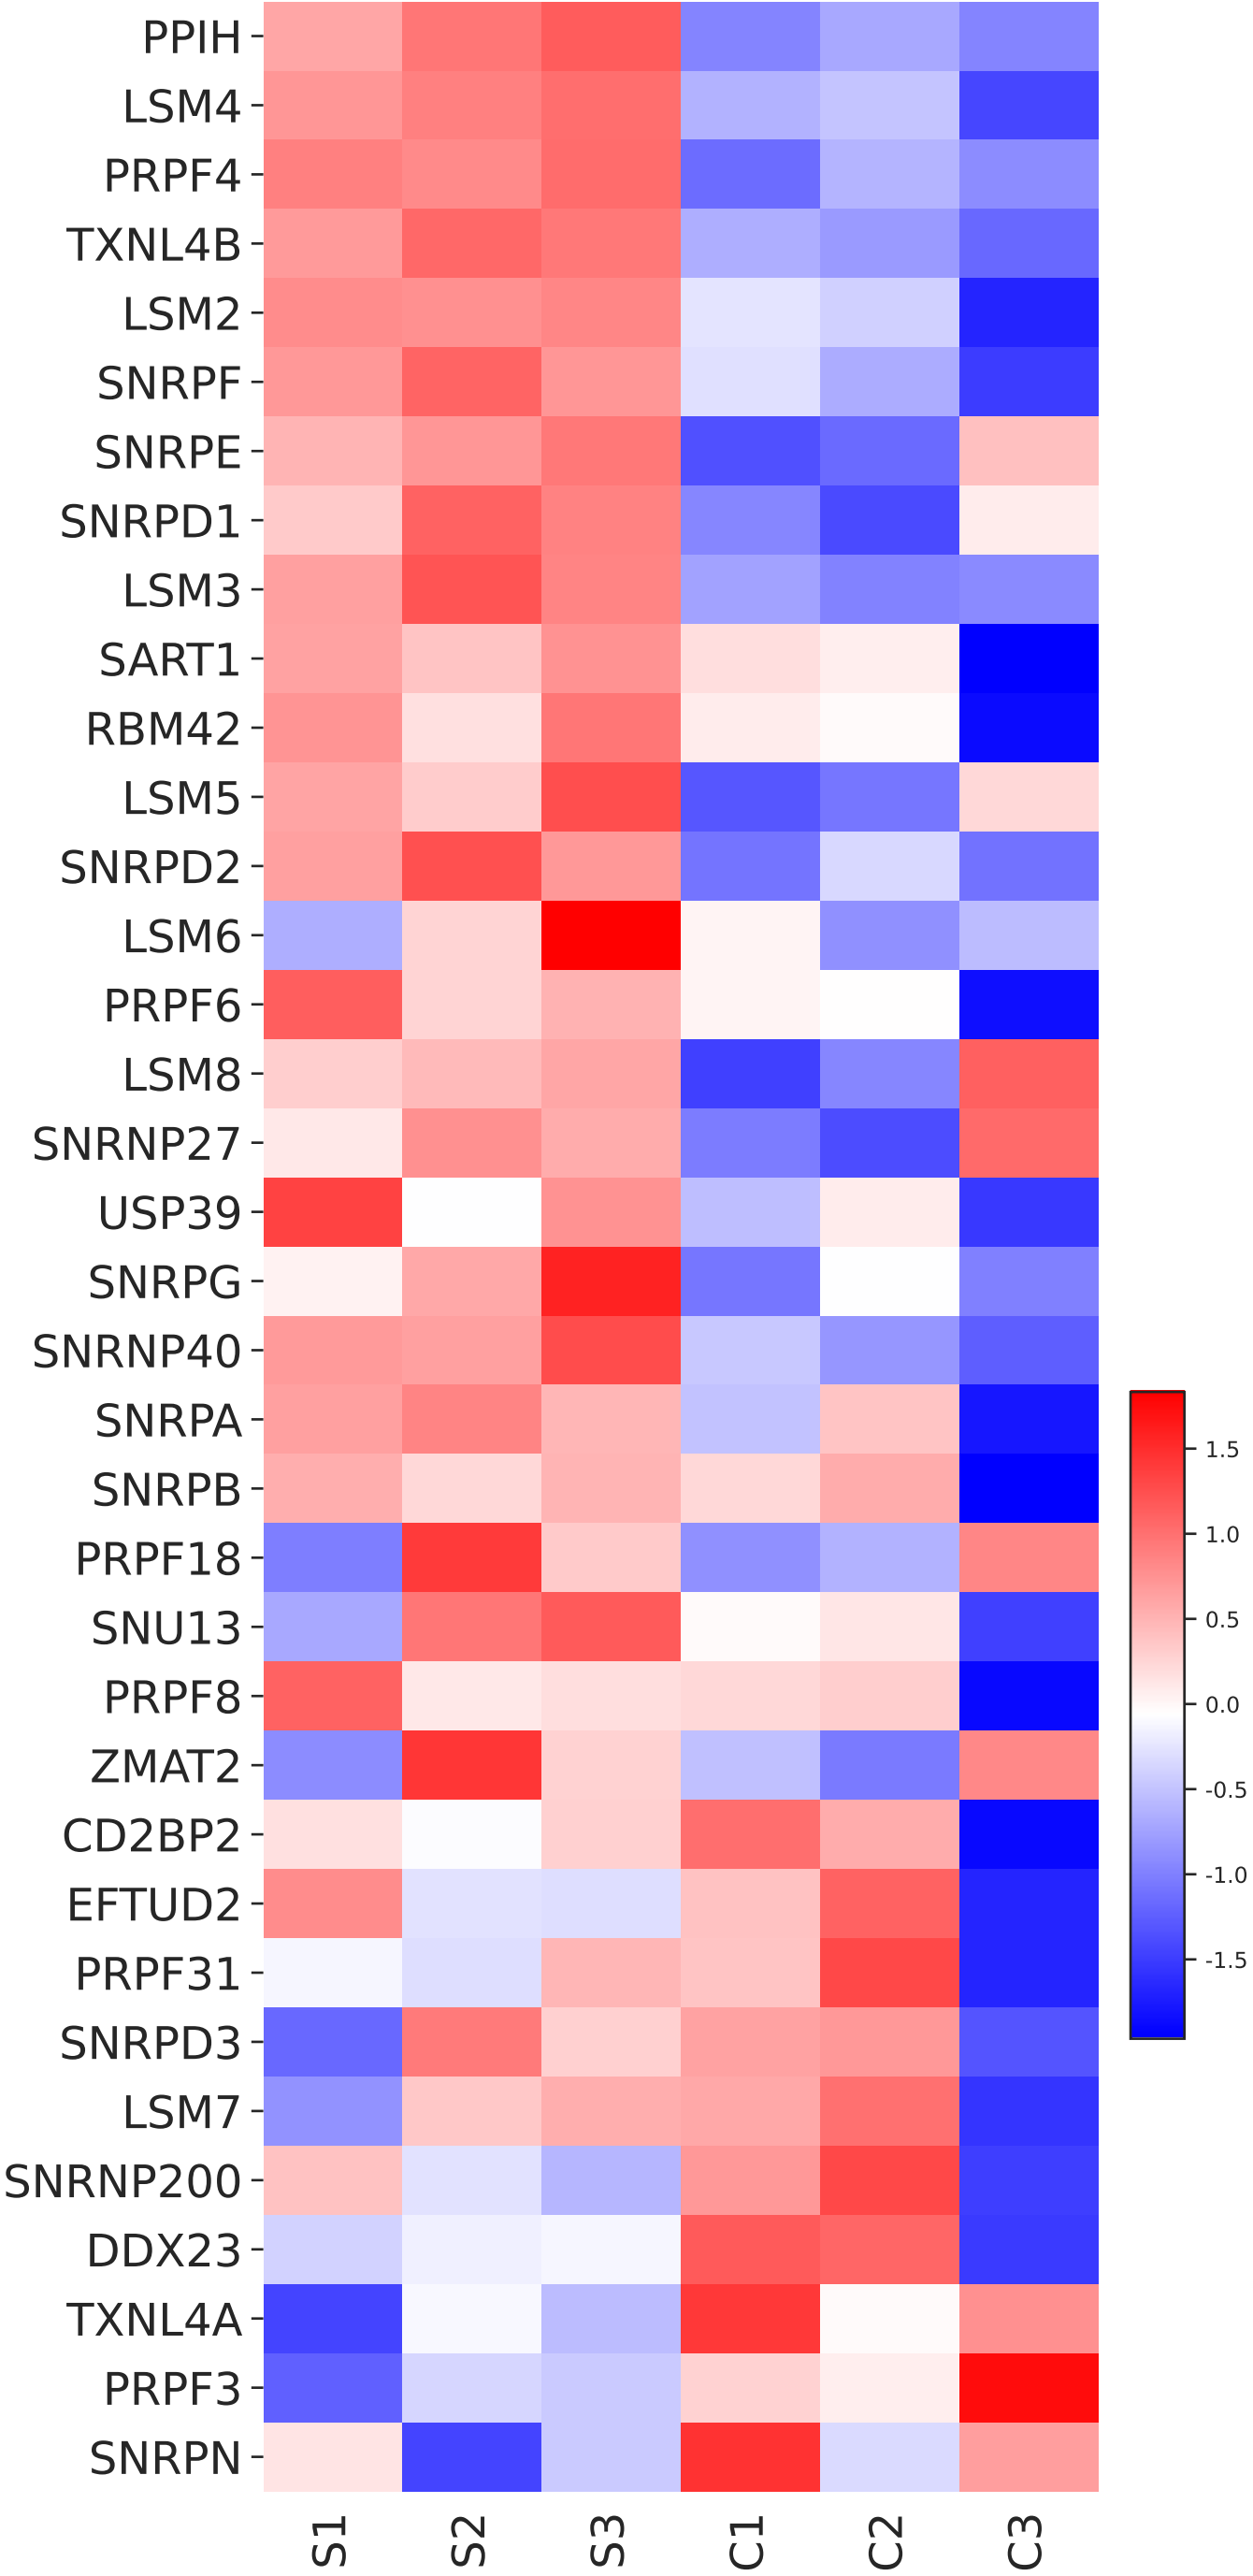

Supplement: Supplementary file 376 [file 7_U4_U6 x U5 tri-snRNP complex(GO_0046540).heatmap.pdf › Source data/1.RNA-Seq source data/2.HUVECs/result/1.6.GSEA/S-vs-C/go/CC/7_U4_U6 x U5 tri-snRNP complex(GO_0046540).heatmap.pdf]

# proteasome accessory complex(GO:0022624)

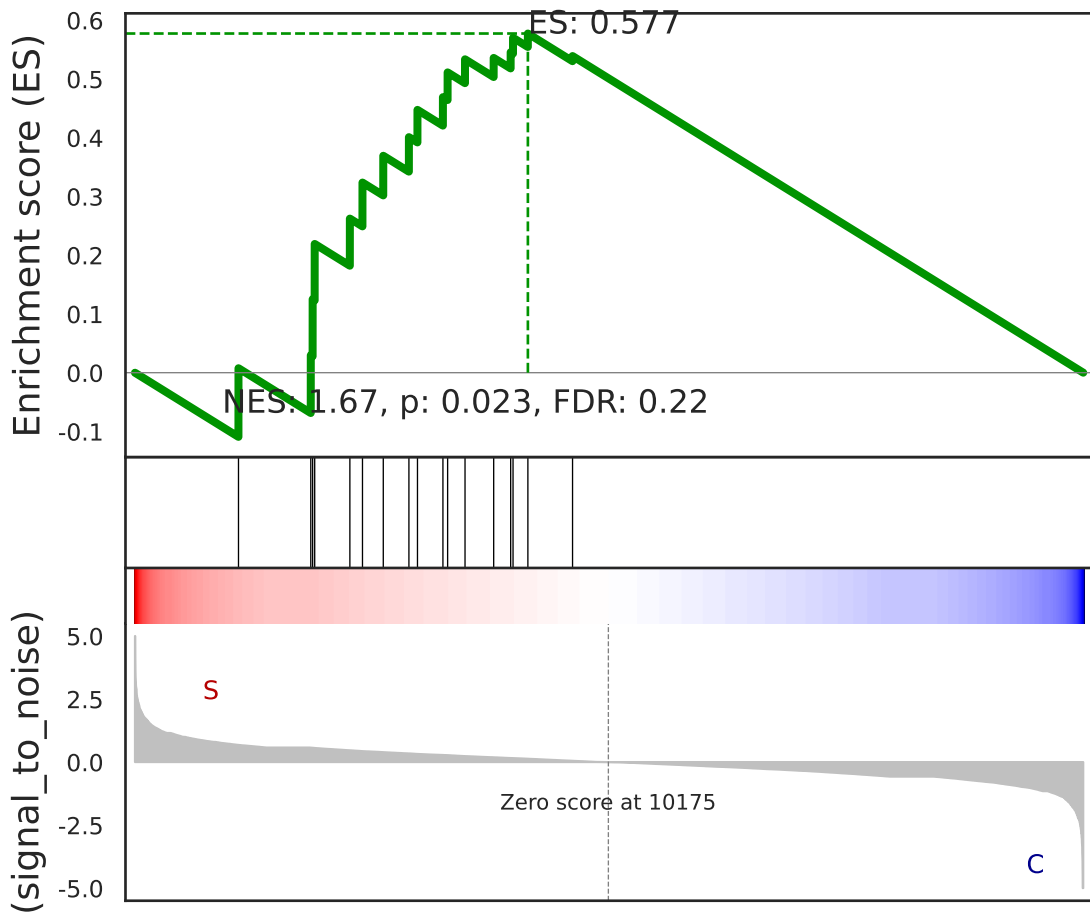

Supplement: Supplementary file 377 [file 8_proteasome accessory complex(GO_0022624).gsea.pdf › Source data/1.RNA-Seq source data/2.HUVECs/result/1.6.GSEA/S-vs-C/go/CC/8_proteasome accessory complex(GO_0022624).gsea.pdf]

proteasome accessory complex(GO:0022624)

Heatmap of the Analyzed GeneSet

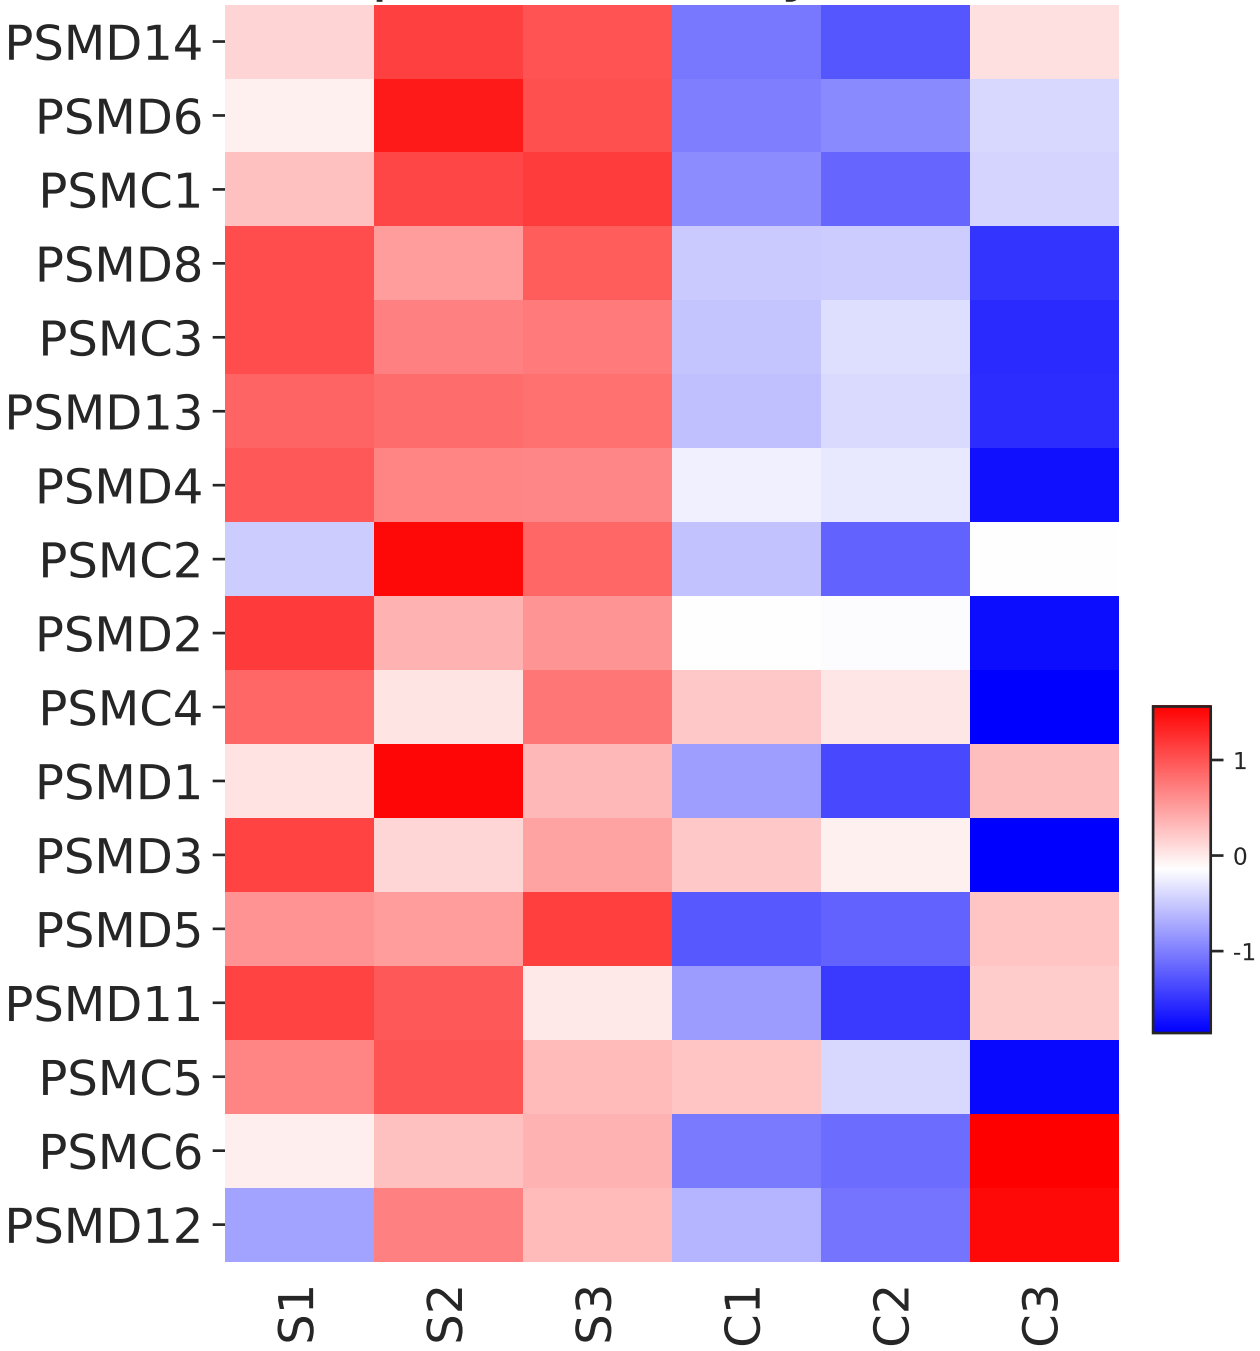

Supplement: Supplementary file 378 [file 8_proteasome accessory complex(GO_0022624).heatmap.pdf › Source data/1.RNA-Seq source data/2.HUVECs/result/1.6.GSEA/S-vs-C/go/CC/8_proteasome accessory complex(GO_0022624).heatmap.pdf]

# mitochondrial matrix(GO:0005759)

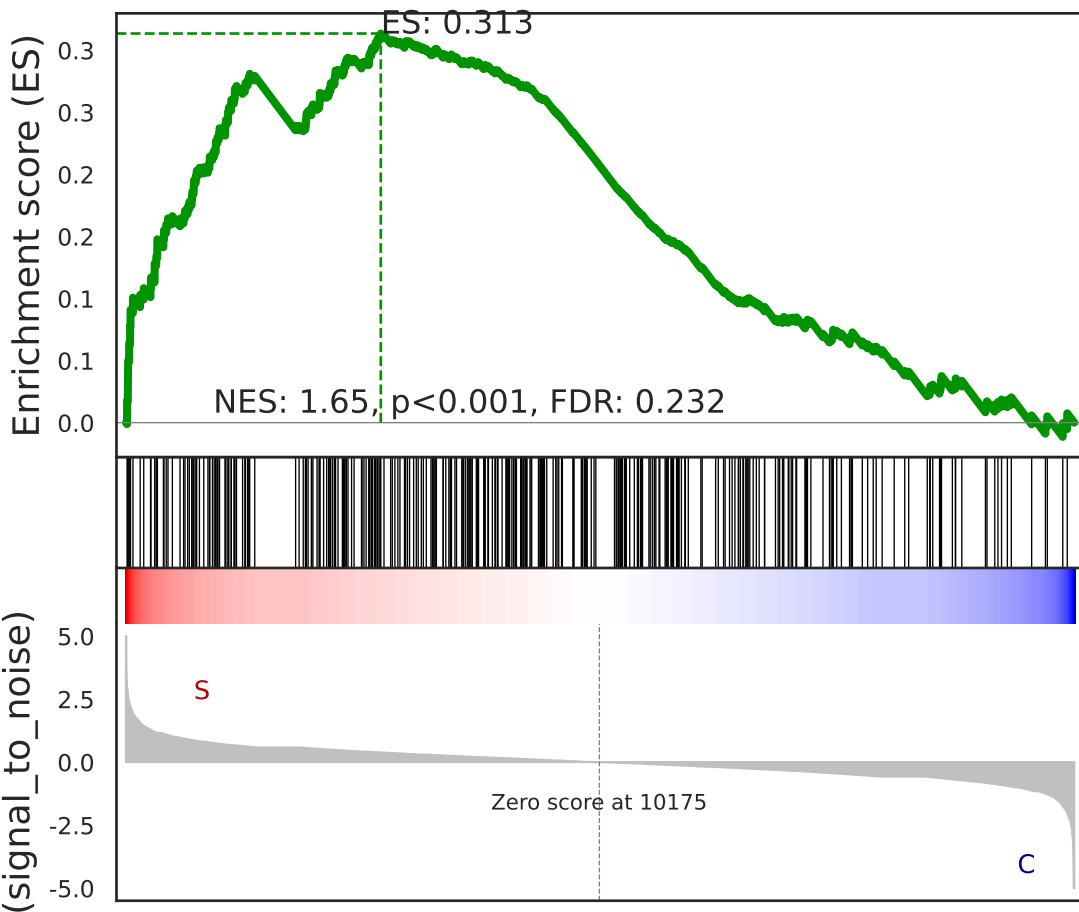

Supplement: Supplementary file 379 [file 9_mitochondrial matrix(GO_0005759).gsea.pdf › Source data/1.RNA-Seq source data/2.HUVECs/result/1.6.GSEA/S-vs-C/go/CC/9_mitochondrial matrix(GO_0005759).gsea.pdf]

mitochondrial matrix(GO:0005759)  
Heatmap of the Analyzed GeneSet

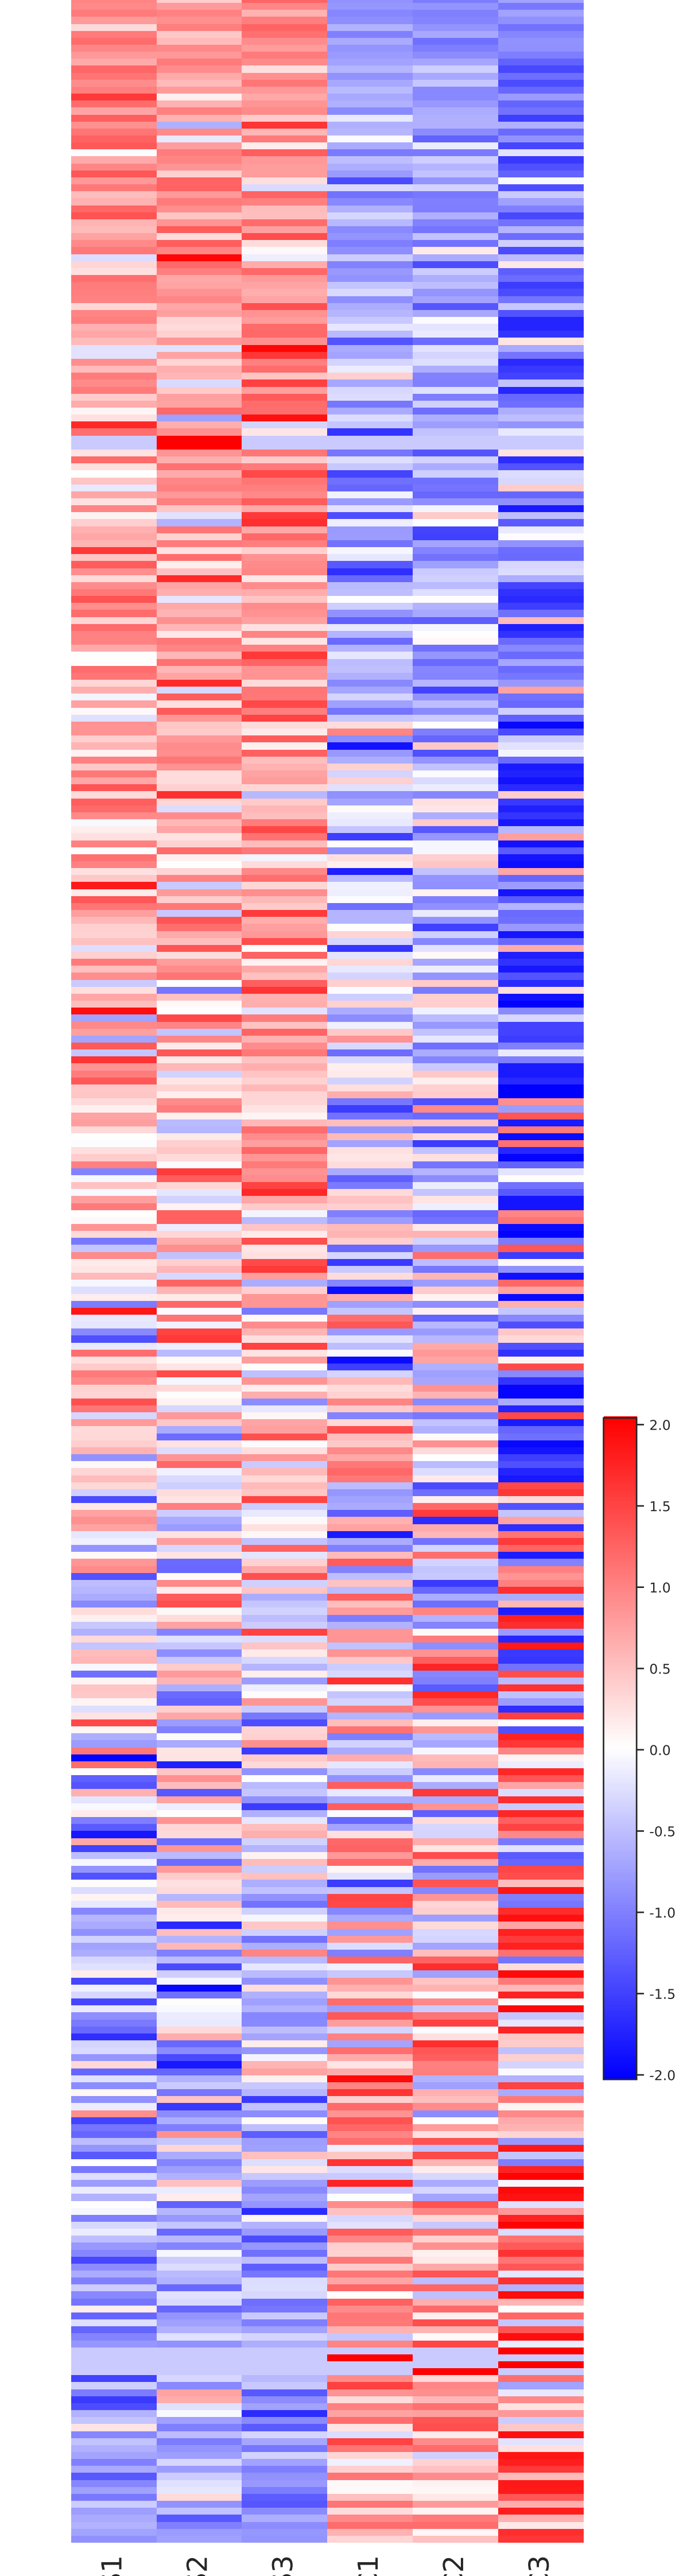

Supplement: Supplementary file 380 [file 9_mitochondrial matrix(GO_0005759).heatmap.pdf › Source data/1.RNA-Seq source data/2.HUVECs/result/1.6.GSEA/S-vs-C/go/CC/9_mitochondrial matrix(GO_0005759).heatmap.pdf]

cysteine-type endopeptidase activator activity involved i...(GO:0008656)

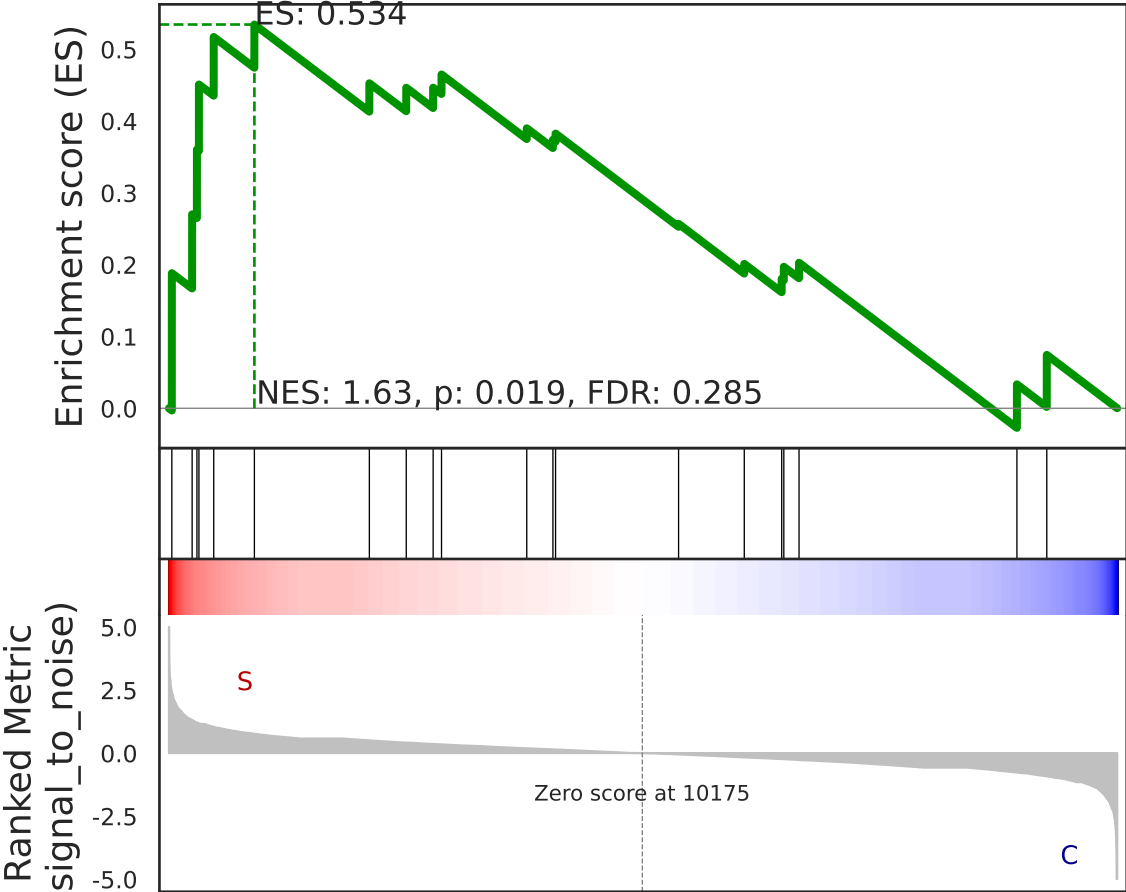

Supplement: Supplementary file 381 [file 10_cysteine-type endopeptidase activator activity involved i...(GO_0008656).gsea.pdf › Source data/1.RNA-Seq source data/2.HUVECs/result/1.6.GSEA/S-vs-C/go/MF/10_cysteine-type endopeptidase activator activity involved i...(GO_0008656).gsea.pdf]

# structural constituent of ribosome(GO:0003735)

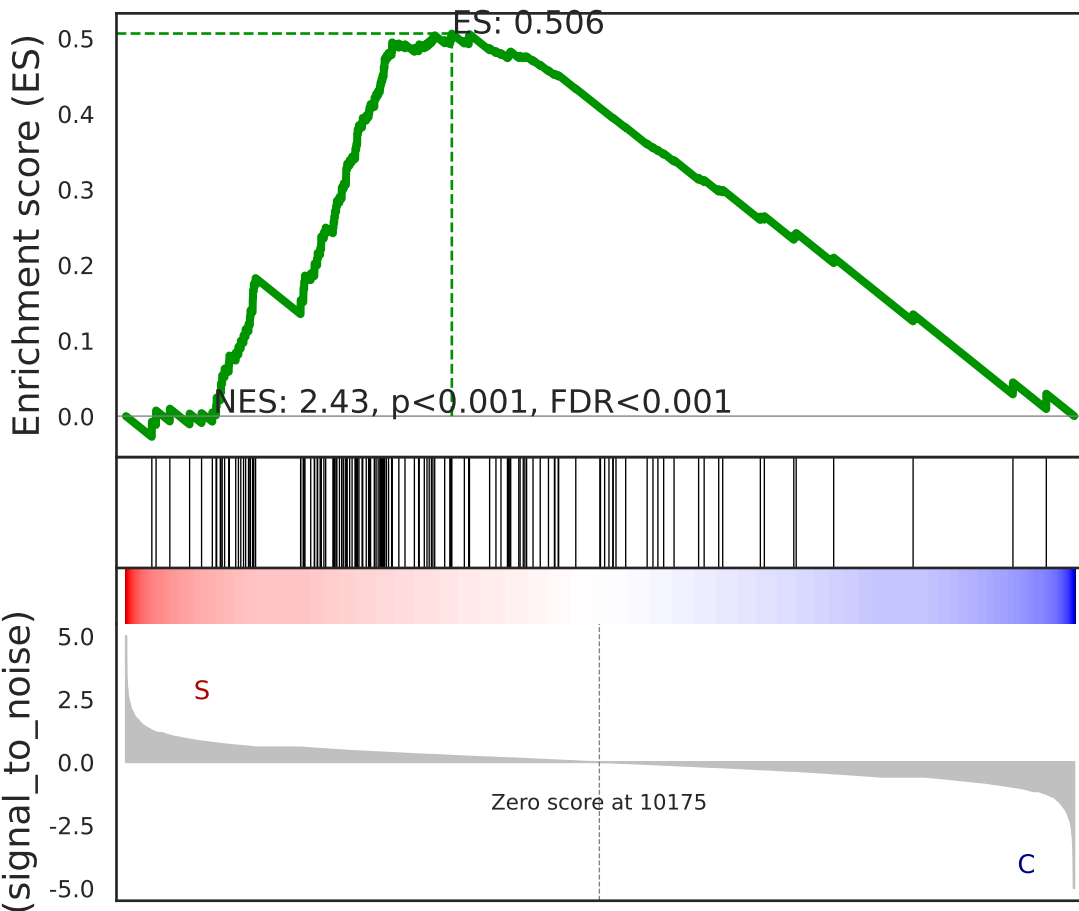

Supplement: Supplementary file 383 [file 1_structural constituent of ribosome(GO_0003735).gsea.pdf › Source data/1.RNA-Seq source data/2.HUVECs/result/1.6.GSEA/S-vs-C/go/MF/1_structural constituent of ribosome(GO_0003735).gsea.pdf]

structural constituent of ribosome(GO:0003735)  
Heatmap of the Analyzed GeneSet

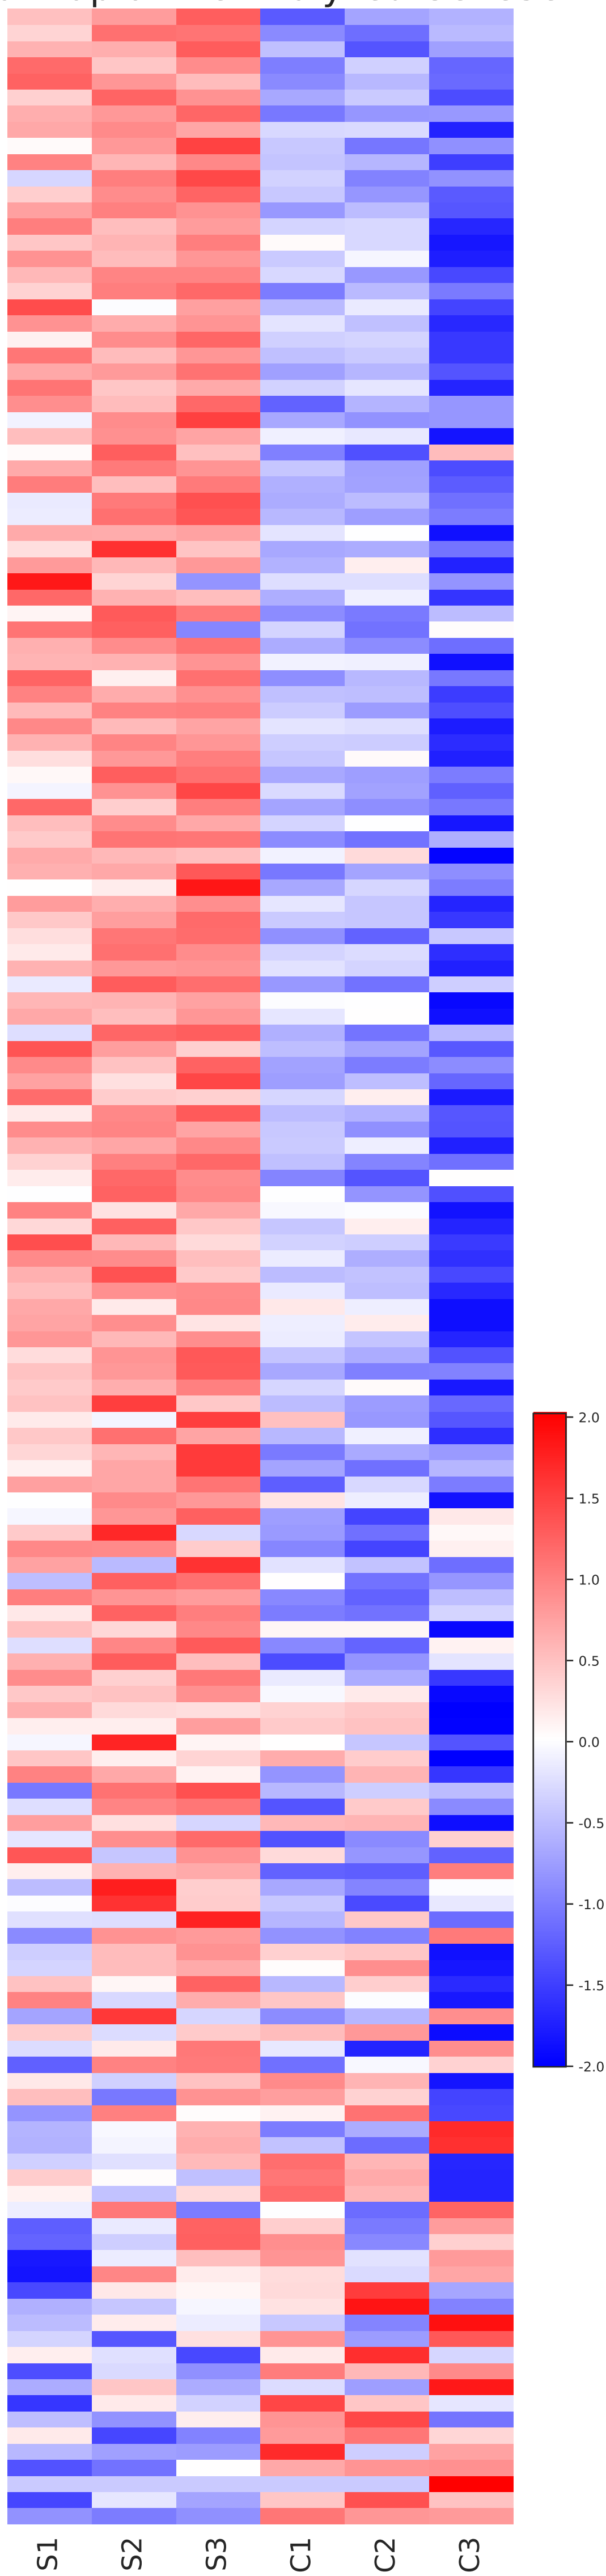

Supplement: Supplementary file 384 [file 1_structural constituent of ribosome(GO_0003735).heatmap.pdf › Source data/1.RNA-Seq source data/2.HUVECs/result/1.6.GSEA/S-vs-C/go/MF/1_structural constituent of ribosome(GO_0003735).heatmap.pdf]

# Notch binding(GO:0005112)

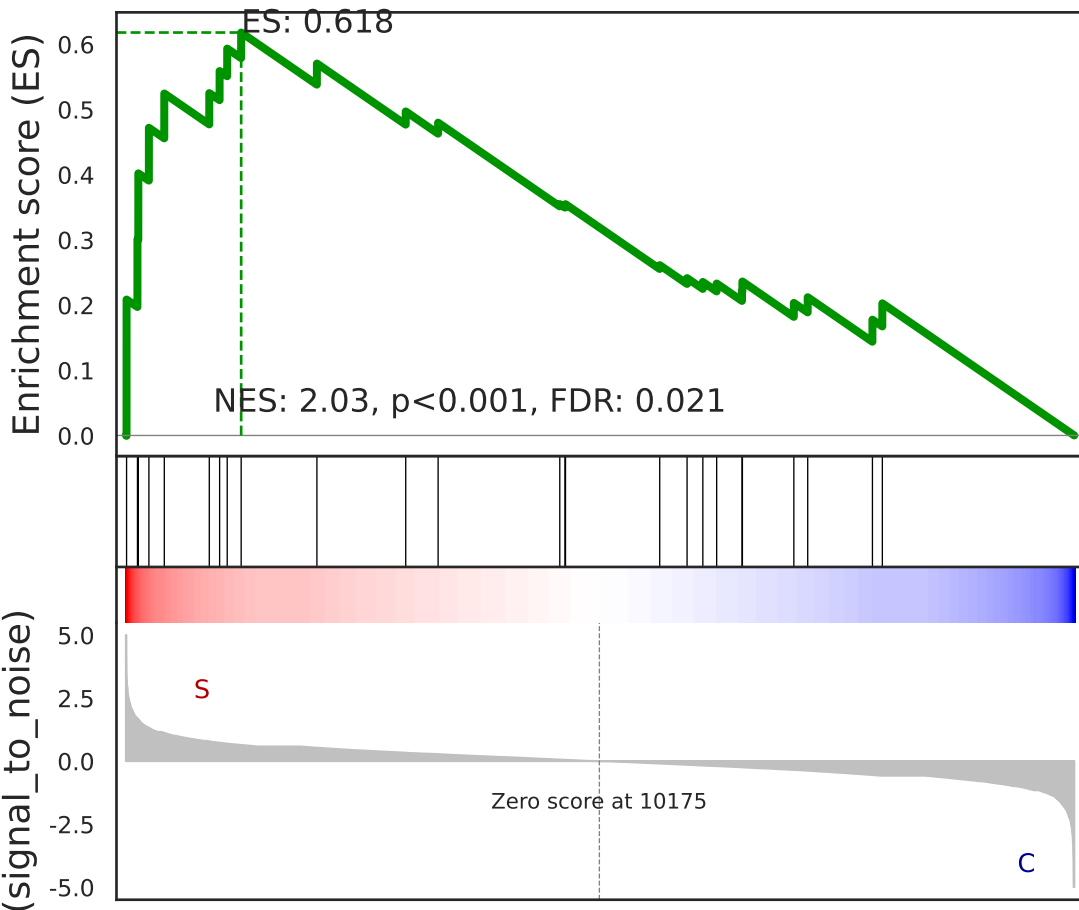

Supplement: Supplementary file 385 [file 2_Notch binding(GO_0005112).gsea.pdf › Source data/1.RNA-Seq source data/2.HUVECs/result/1.6.GSEA/S-vs-C/go/MF/2_Notch binding(GO_0005112).gsea.pdf]

Notch binding(GO:0005112)  
Heatmap of the Analyzed GeneSet

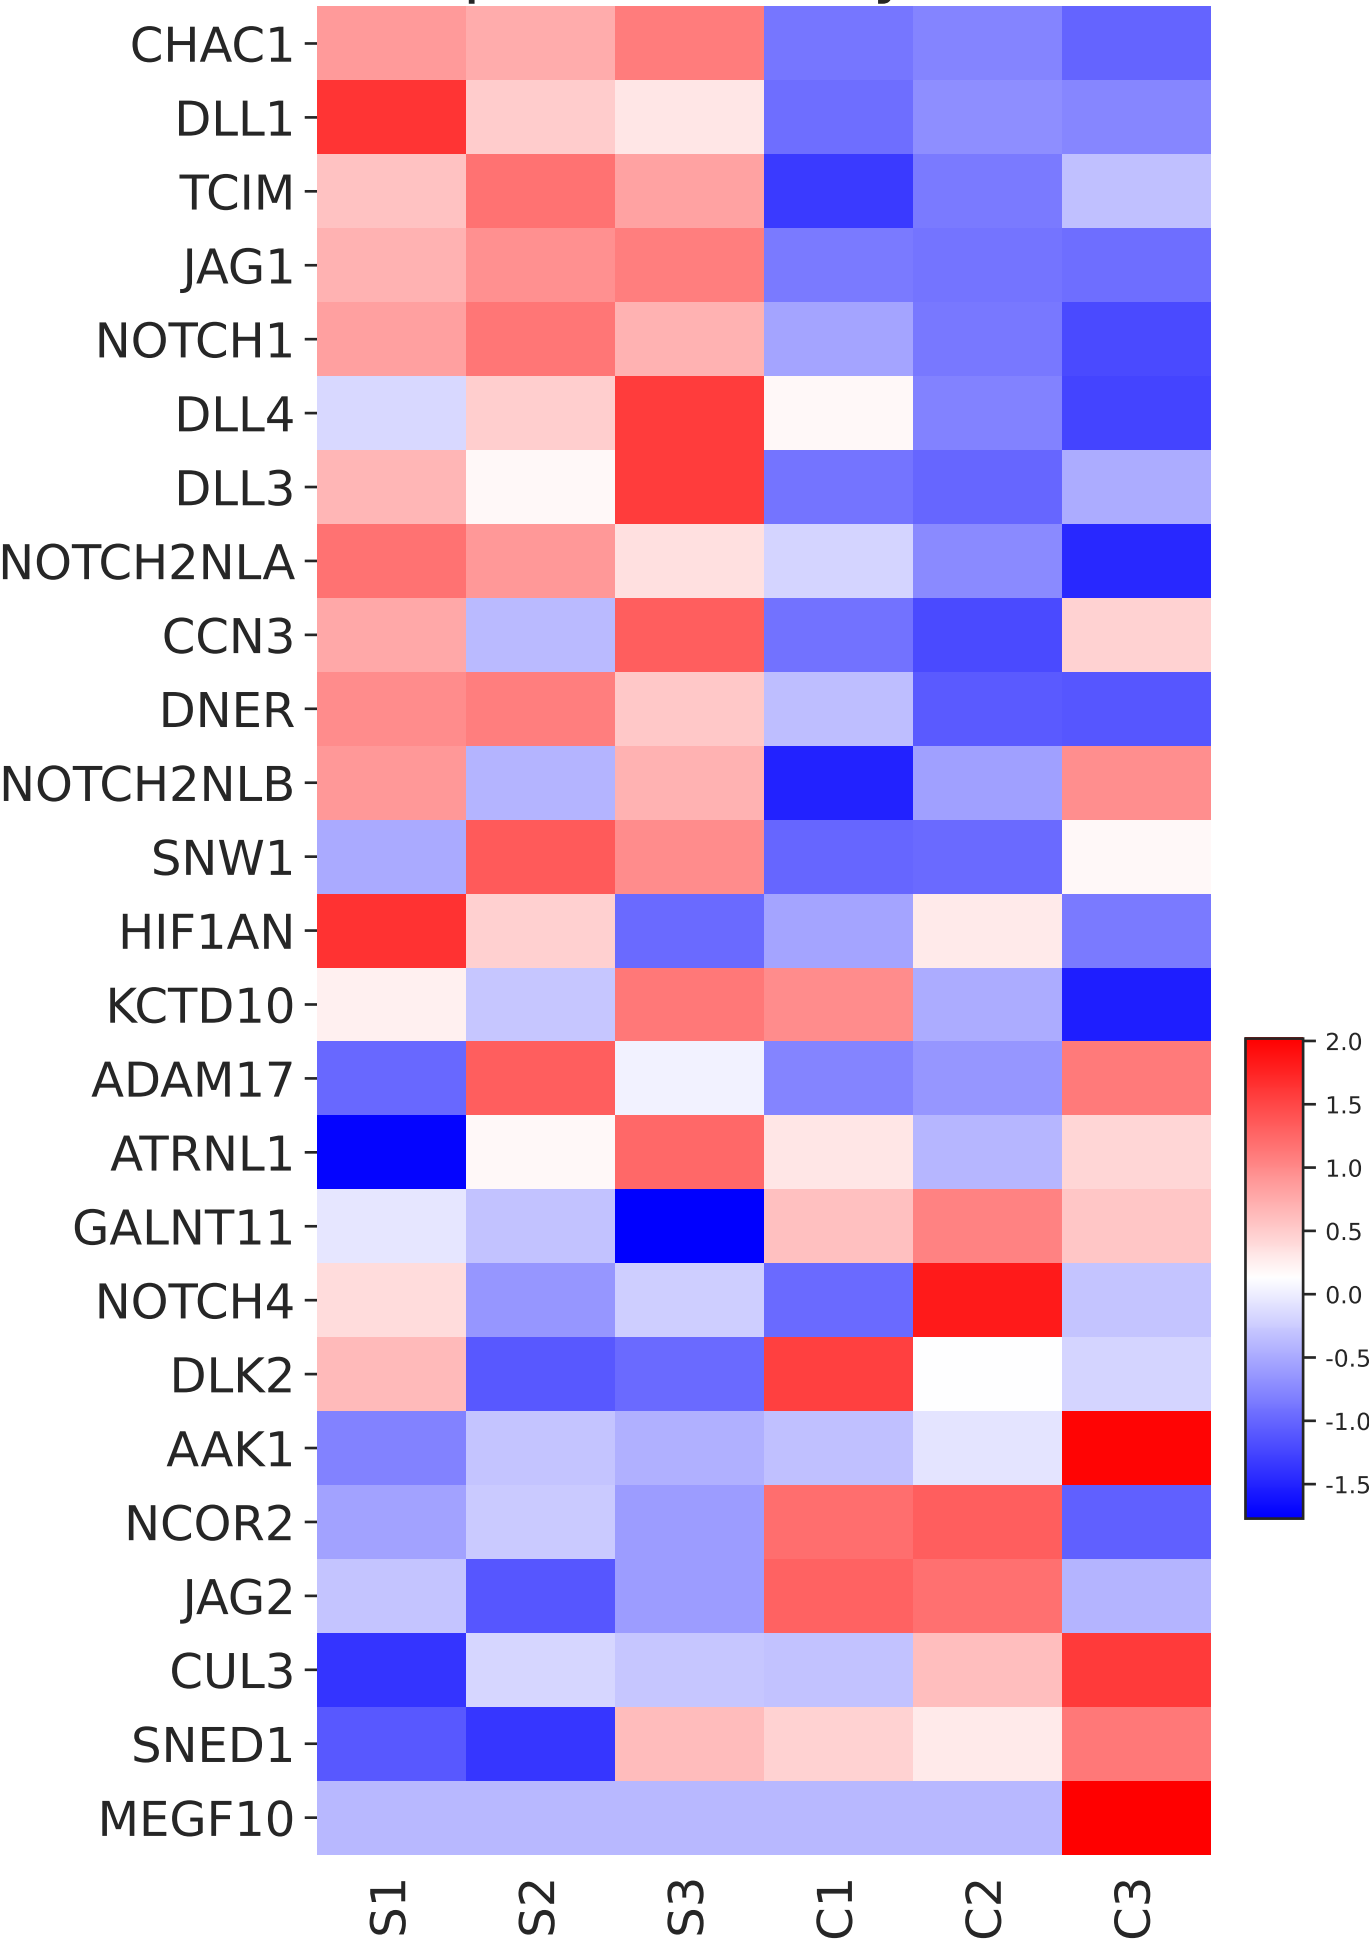

Supplement: Supplementary file 386 [file 2_Notch binding(GO_0005112).heatmap.pdf › Source data/1.RNA-Seq source data/2.HUVECs/result/1.6.GSEA/S-vs-C/go/MF/2_Notch binding(GO_0005112).heatmap.pdf]

# pyridoxal phosphate binding(GO:0030170)

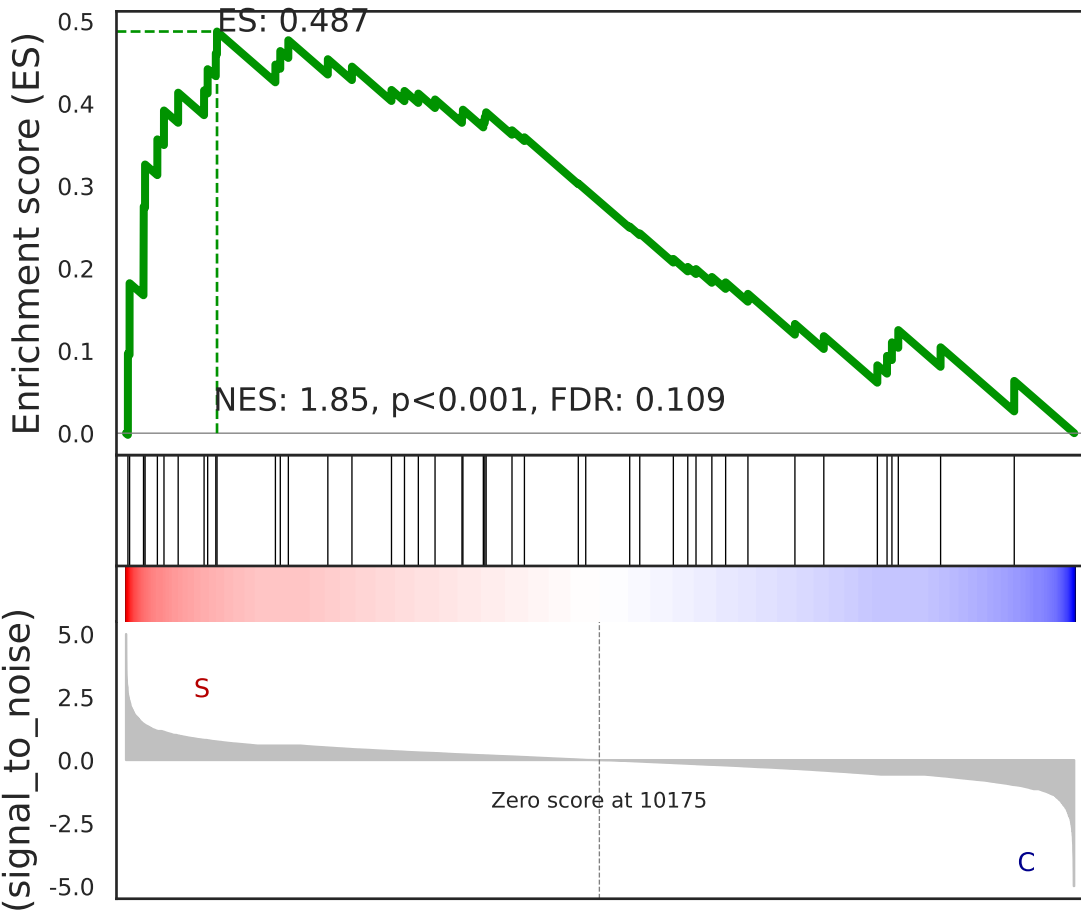

Supplement: Supplementary file 387 [file 3_pyridoxal phosphate binding(GO_0030170).gsea.pdf › Source data/1.RNA-Seq source data/2.HUVECs/result/1.6.GSEA/S-vs-C/go/MF/3_pyridoxal phosphate binding(GO_0030170).gsea.pdf]

pyridoxal phosphate binding(GO:0030170)  
Heatmap of the Analyzed GeneSet

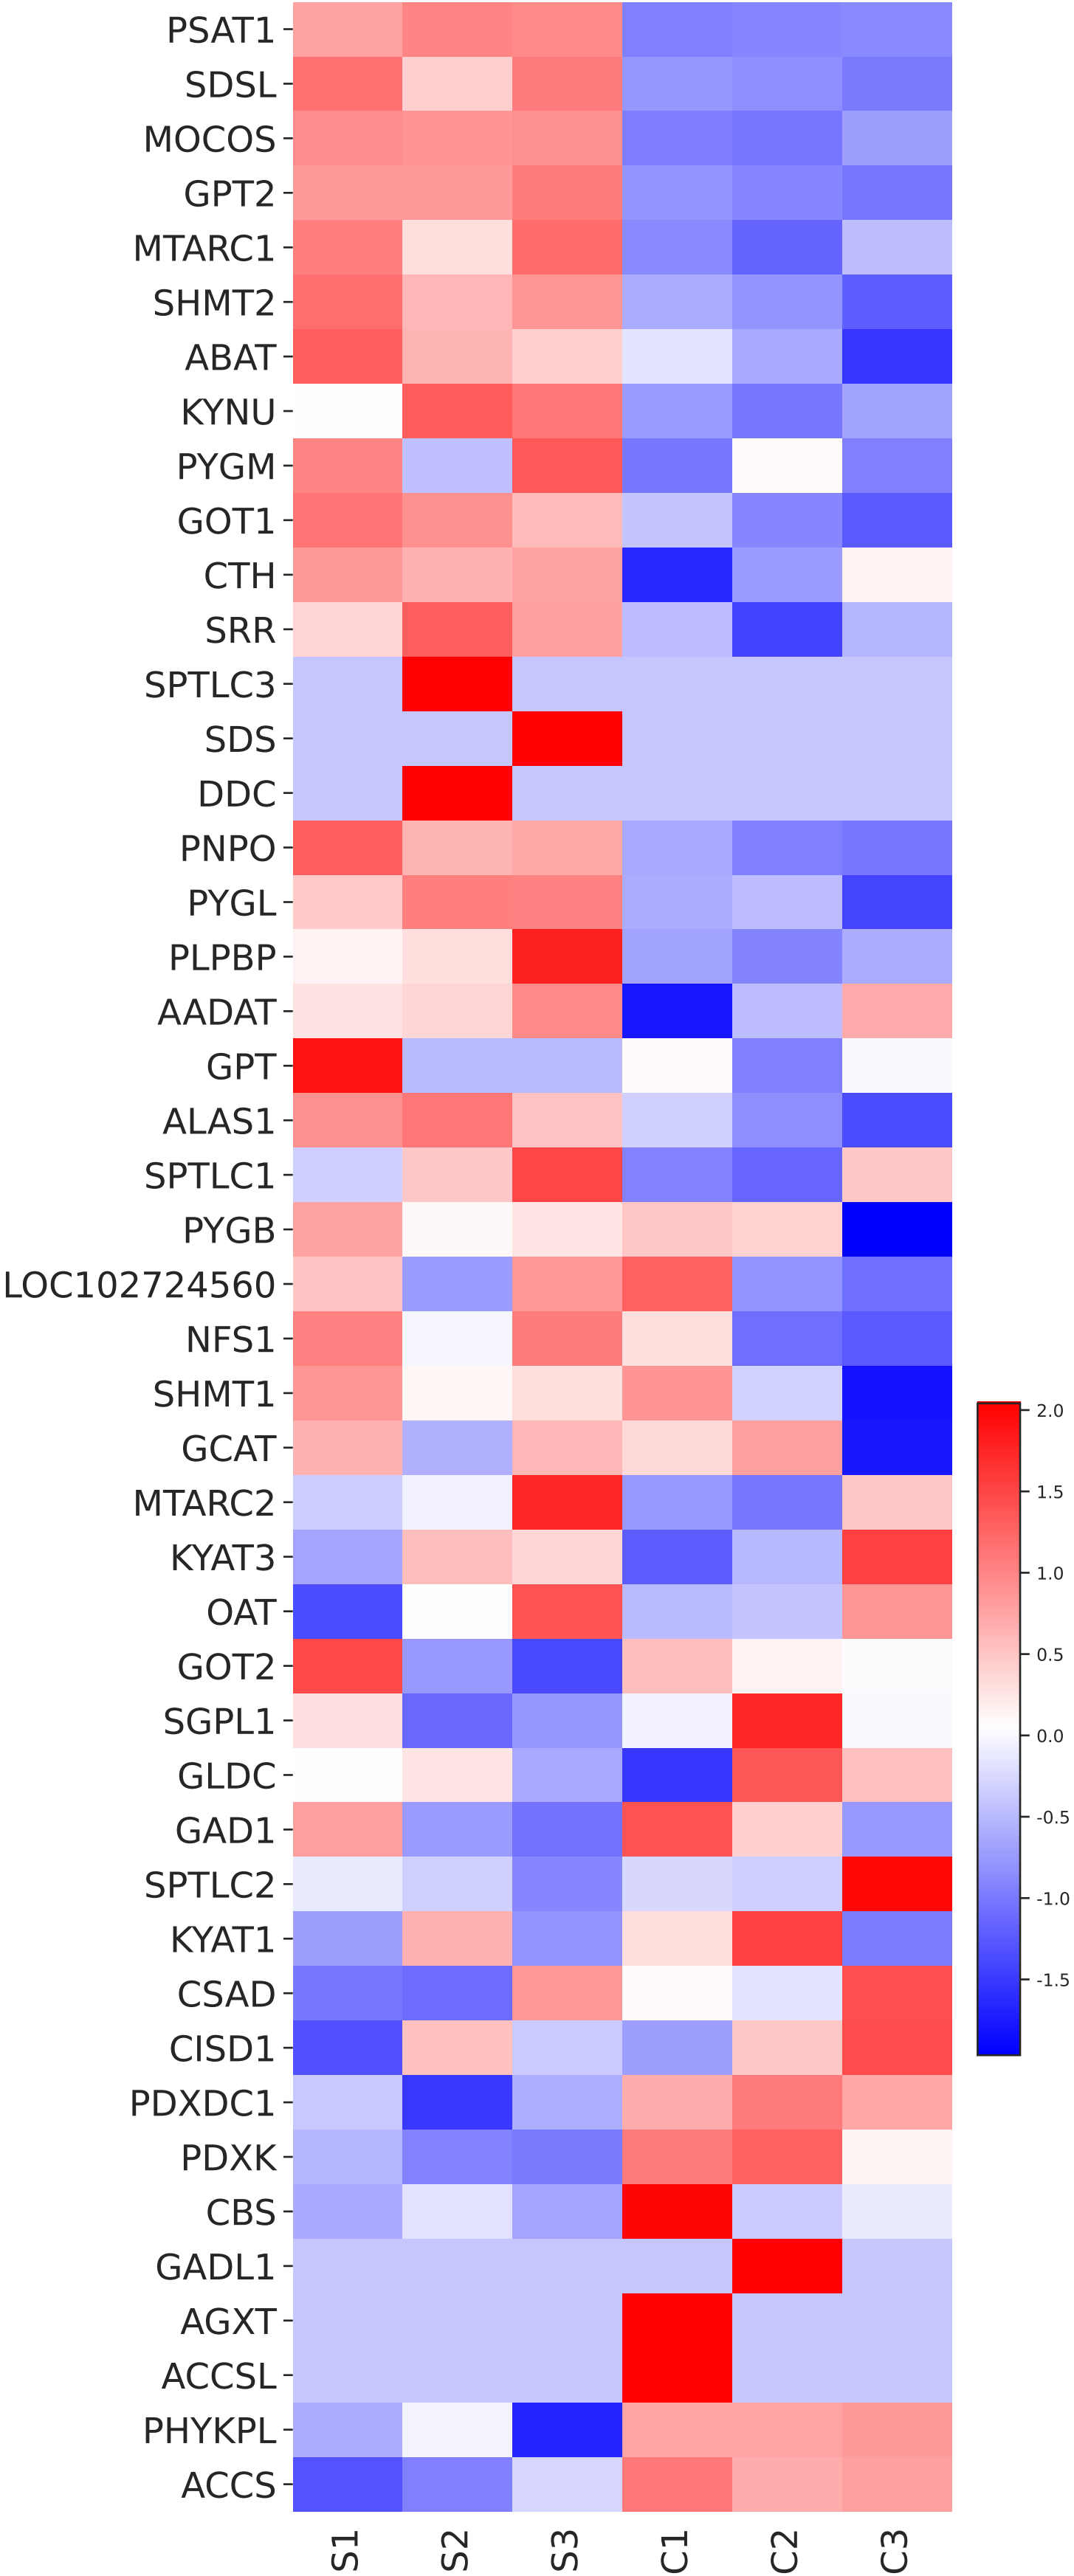

Supplement: Supplementary file 388 [file 3_pyridoxal phosphate binding(GO_0030170).heatmap.pdf › Source data/1.RNA-Seq source data/2.HUVECs/result/1.6.GSEA/S-vs-C/go/MF/3_pyridoxal phosphate binding(GO_0030170).heatmap.pdf]

# actin monomer binding(GO:0003785)

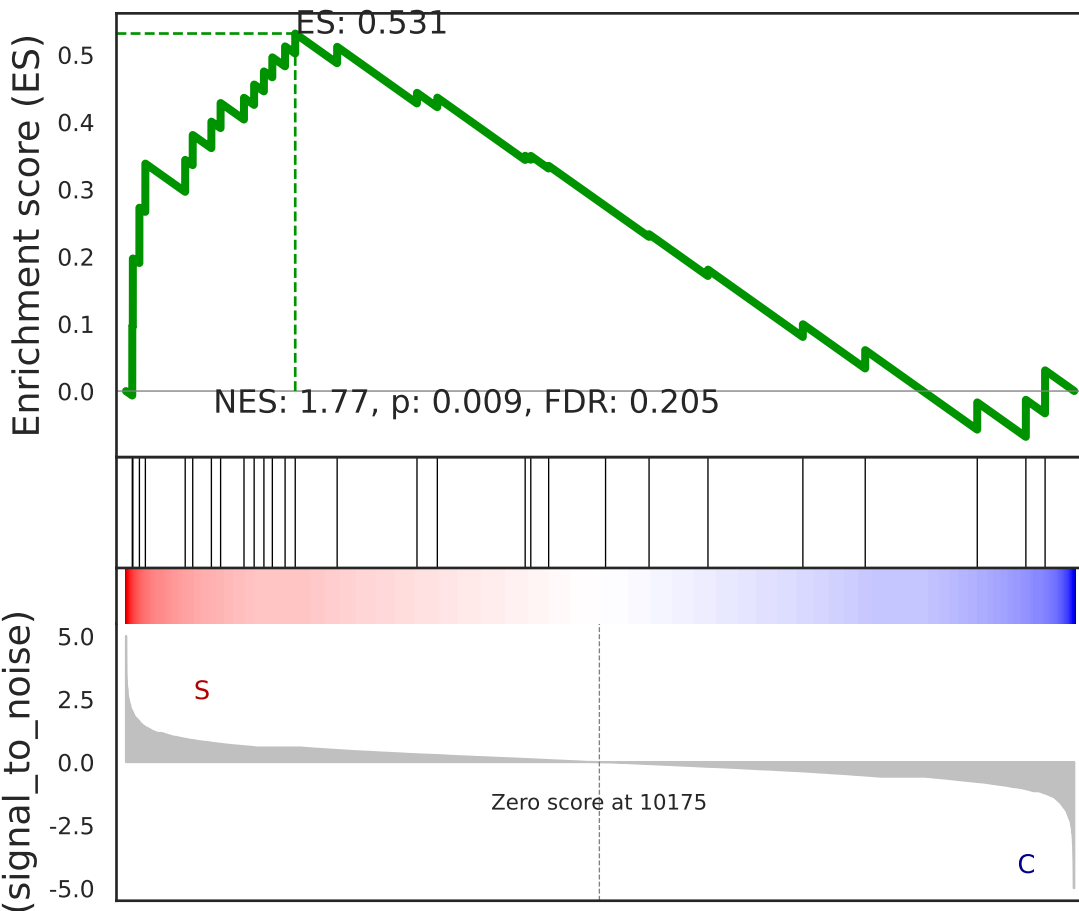

Supplement: Supplementary file 389 [file 4_actin monomer binding(GO_0003785).gsea.pdf › Source data/1.RNA-Seq source data/2.HUVECs/result/1.6.GSEA/S-vs-C/go/MF/4_actin monomer binding(GO_0003785).gsea.pdf]

actin monomer binding(GO:0003785)  
Heatmap of the Analyzed GeneSet

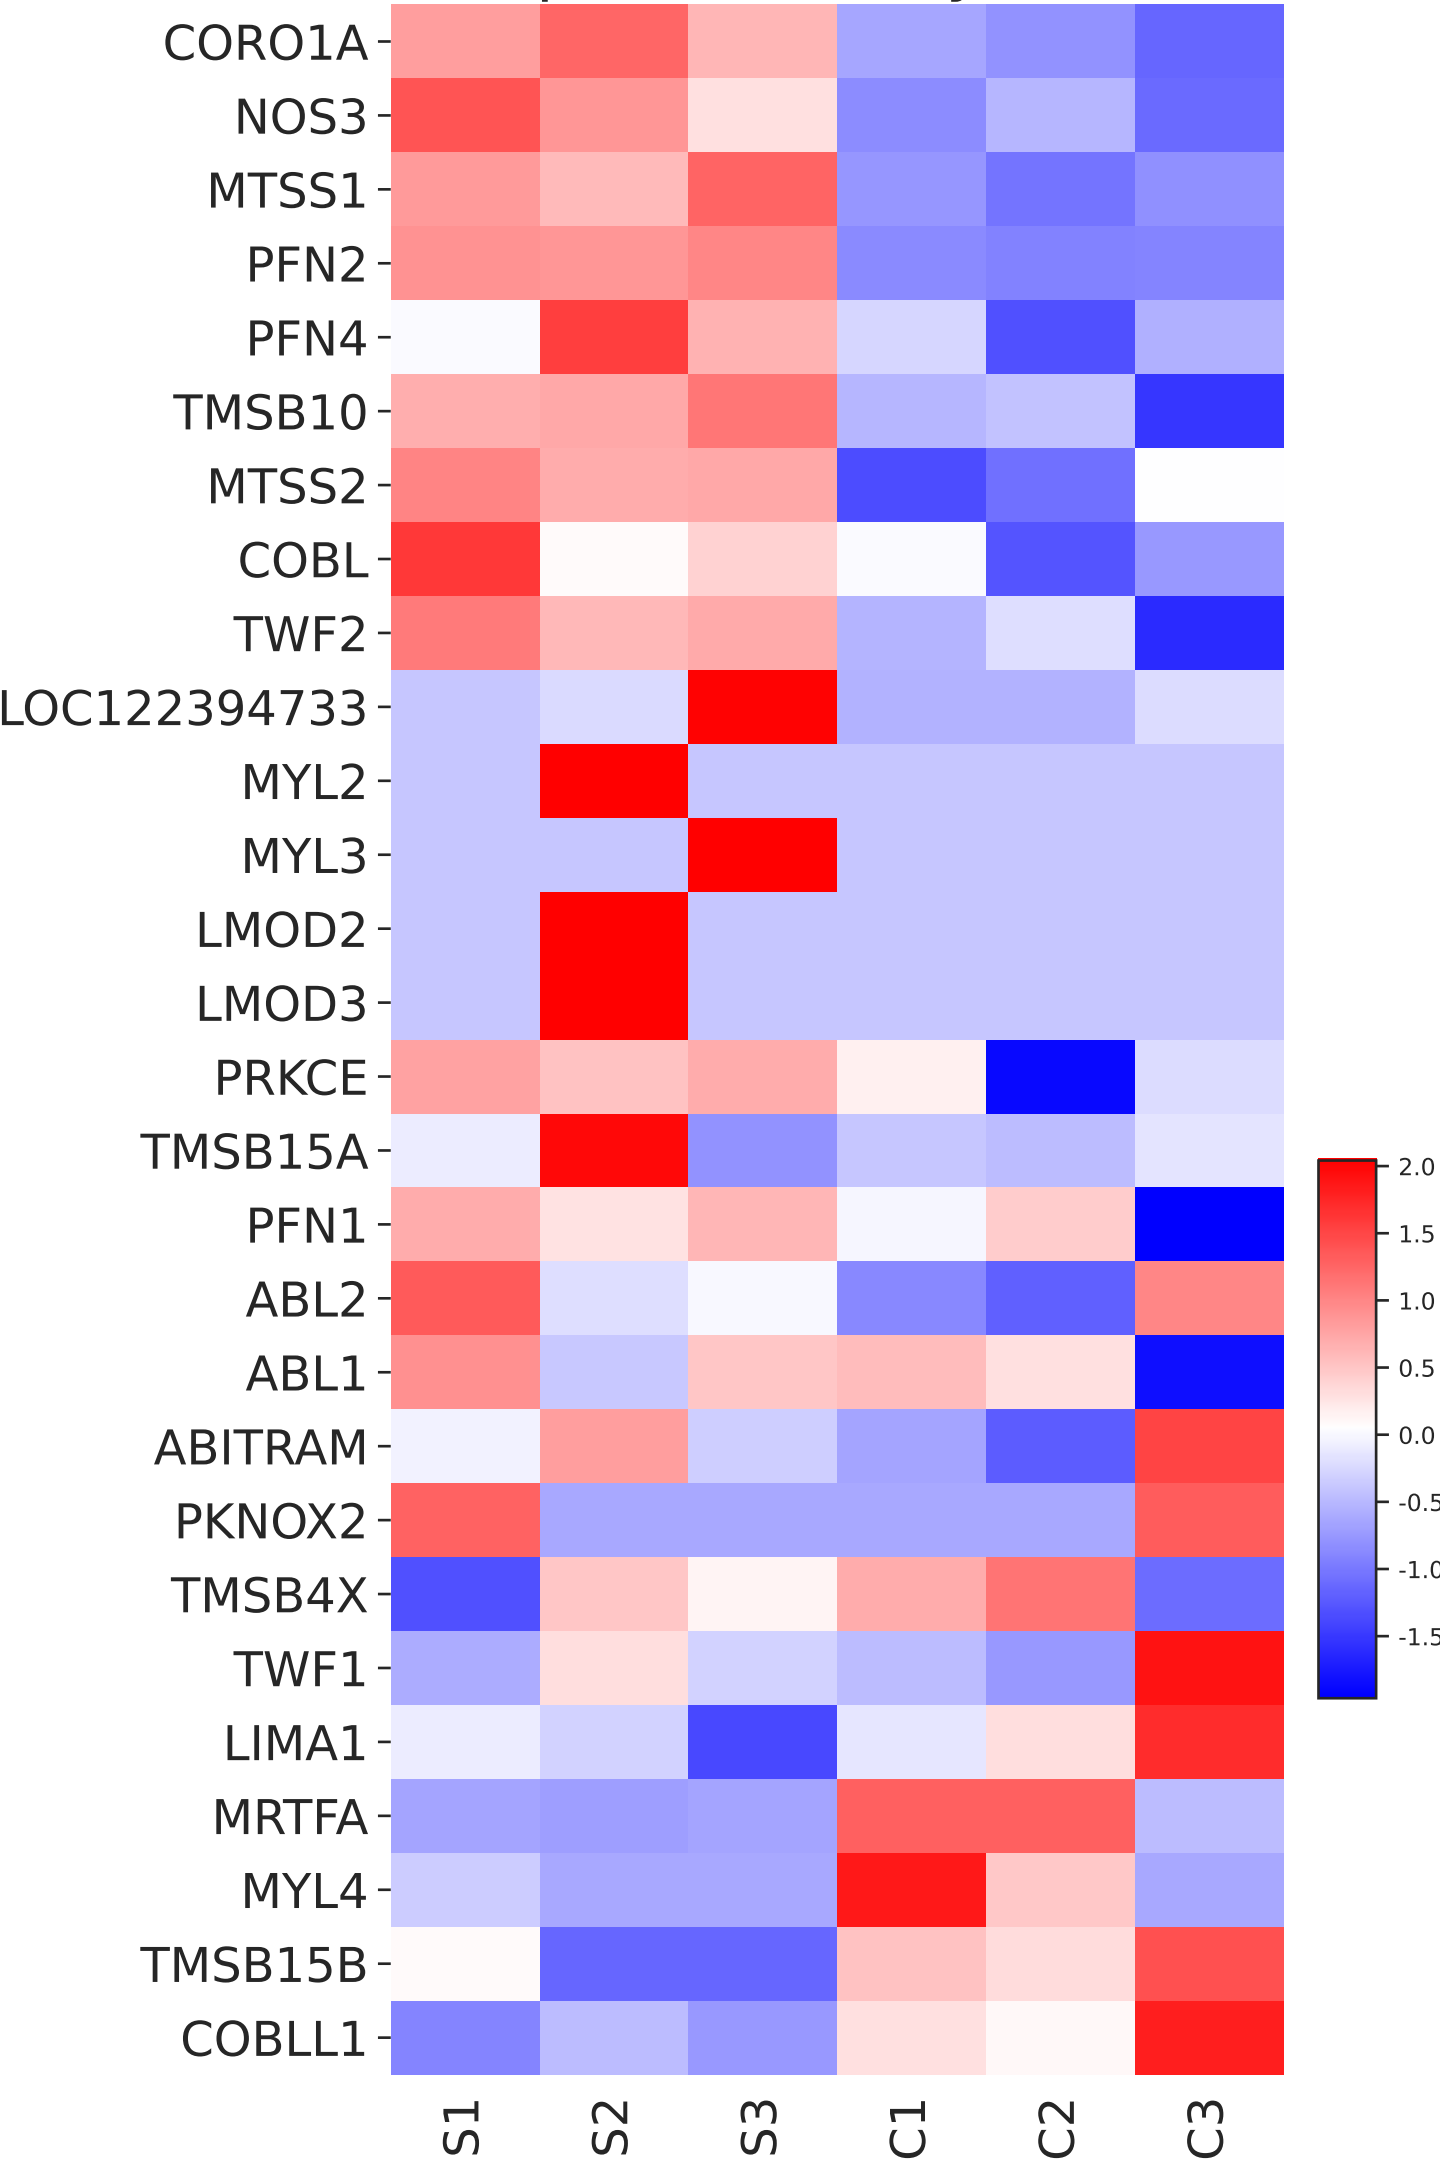

Supplement: Supplementary file 390 [file 4_actin monomer binding(GO_0003785).heatmap.pdf › Source data/1.RNA-Seq source data/2.HUVECs/result/1.6.GSEA/S-vs-C/go/MF/4_actin monomer binding(GO_0003785).heatmap.pdf]

# DNA binding, bending(GO:0008301)

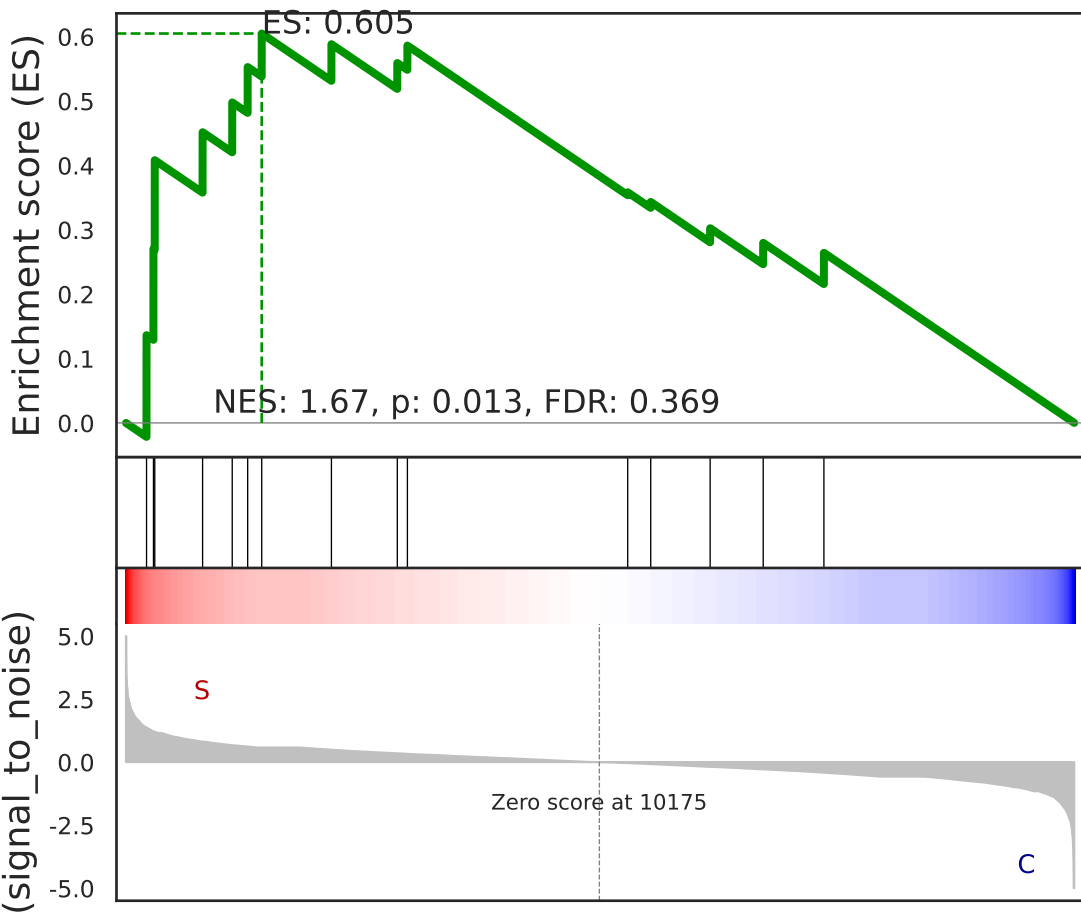

Supplement: Supplementary file 391 [file 5_DNA binding, bending(GO_0008301).gsea.pdf › Source data/1.RNA-Seq source data/2.HUVECs/result/1.6.GSEA/S-vs-C/go/MF/5_DNA binding, bending(GO_0008301).gsea.pdf]

# DNA binding, bending(GO:0008301)

## Heatmap of the Analyzed GeneSet

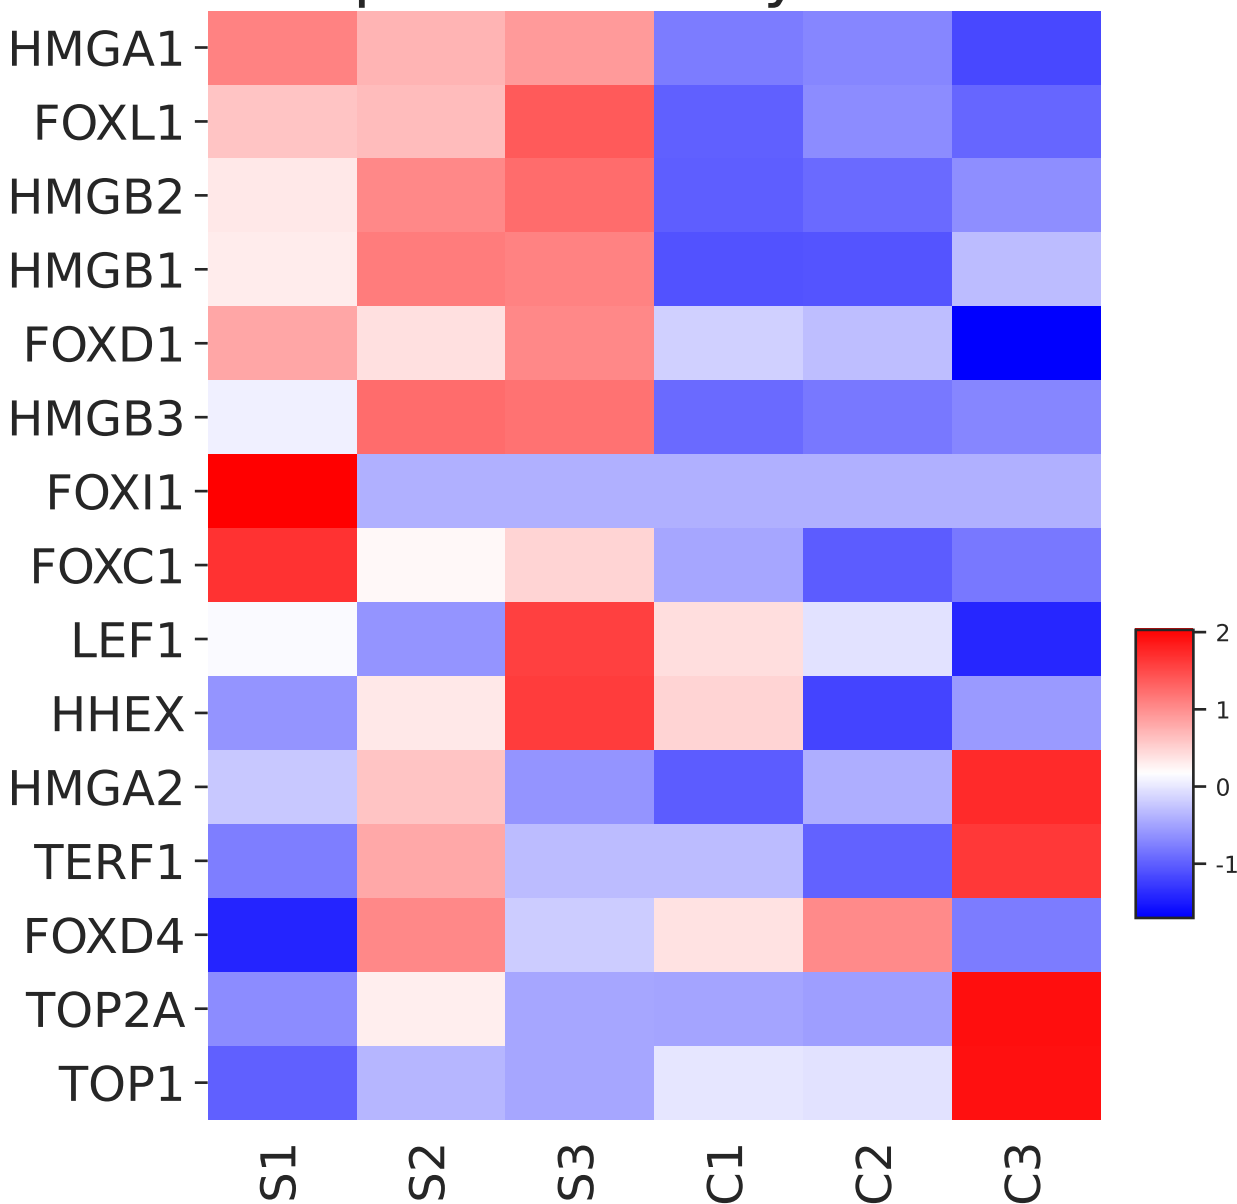

Supplement: Supplementary file 392 [file 5_DNA binding, bending(GO_0008301).heatmap.pdf › Source data/1.RNA-Seq source data/2.HUVECs/result/1.6.GSEA/S-vs-C/go/MF/5_DNA binding, bending(GO_0008301).heatmap.pdf]

# FAD binding(GO:0071949)

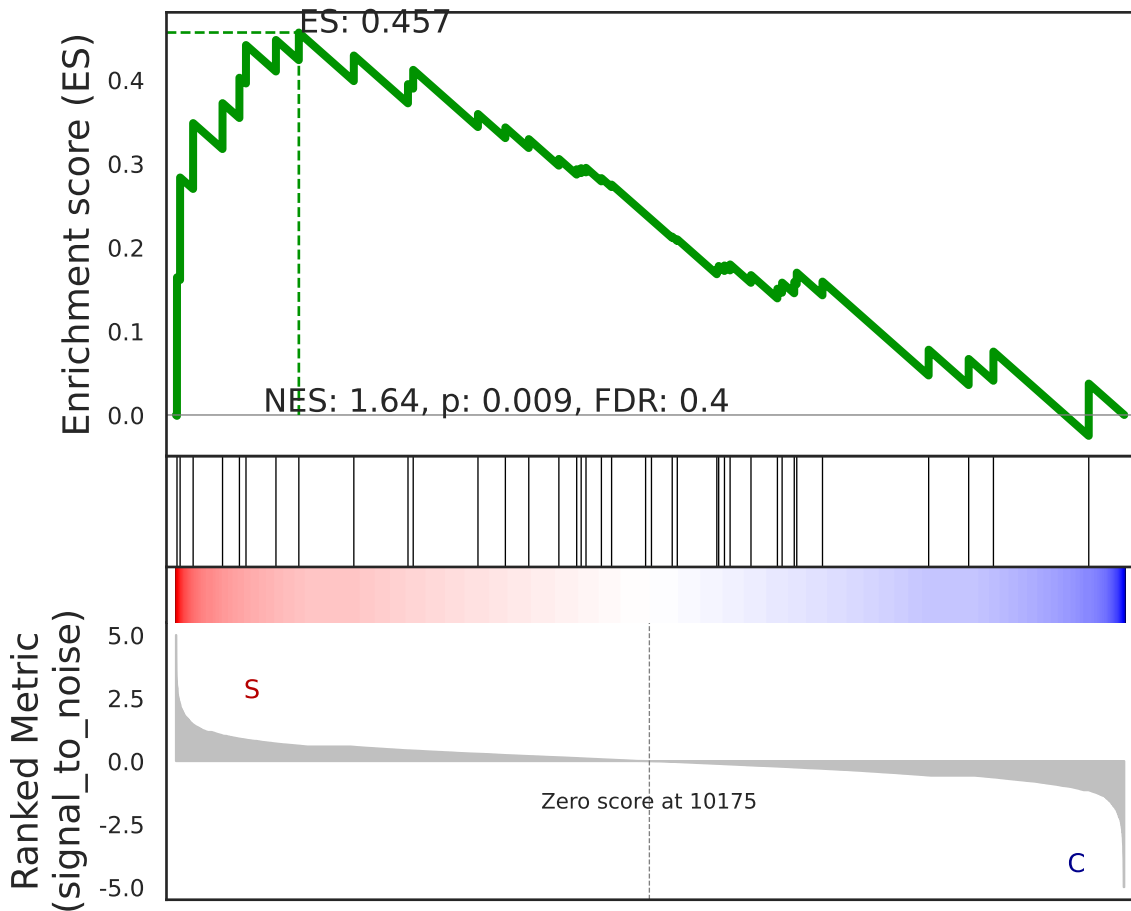

Supplement: Supplementary file 393 [file 6_FAD binding(GO_0071949).gsea.pdf › Source data/1.RNA-Seq source data/2.HUVECs/result/1.6.GSEA/S-vs-C/go/MF/6_FAD binding(GO_0071949).gsea.pdf]

FAD binding(GO:0071949)  
Heatmap of the Analyzed GeneSet

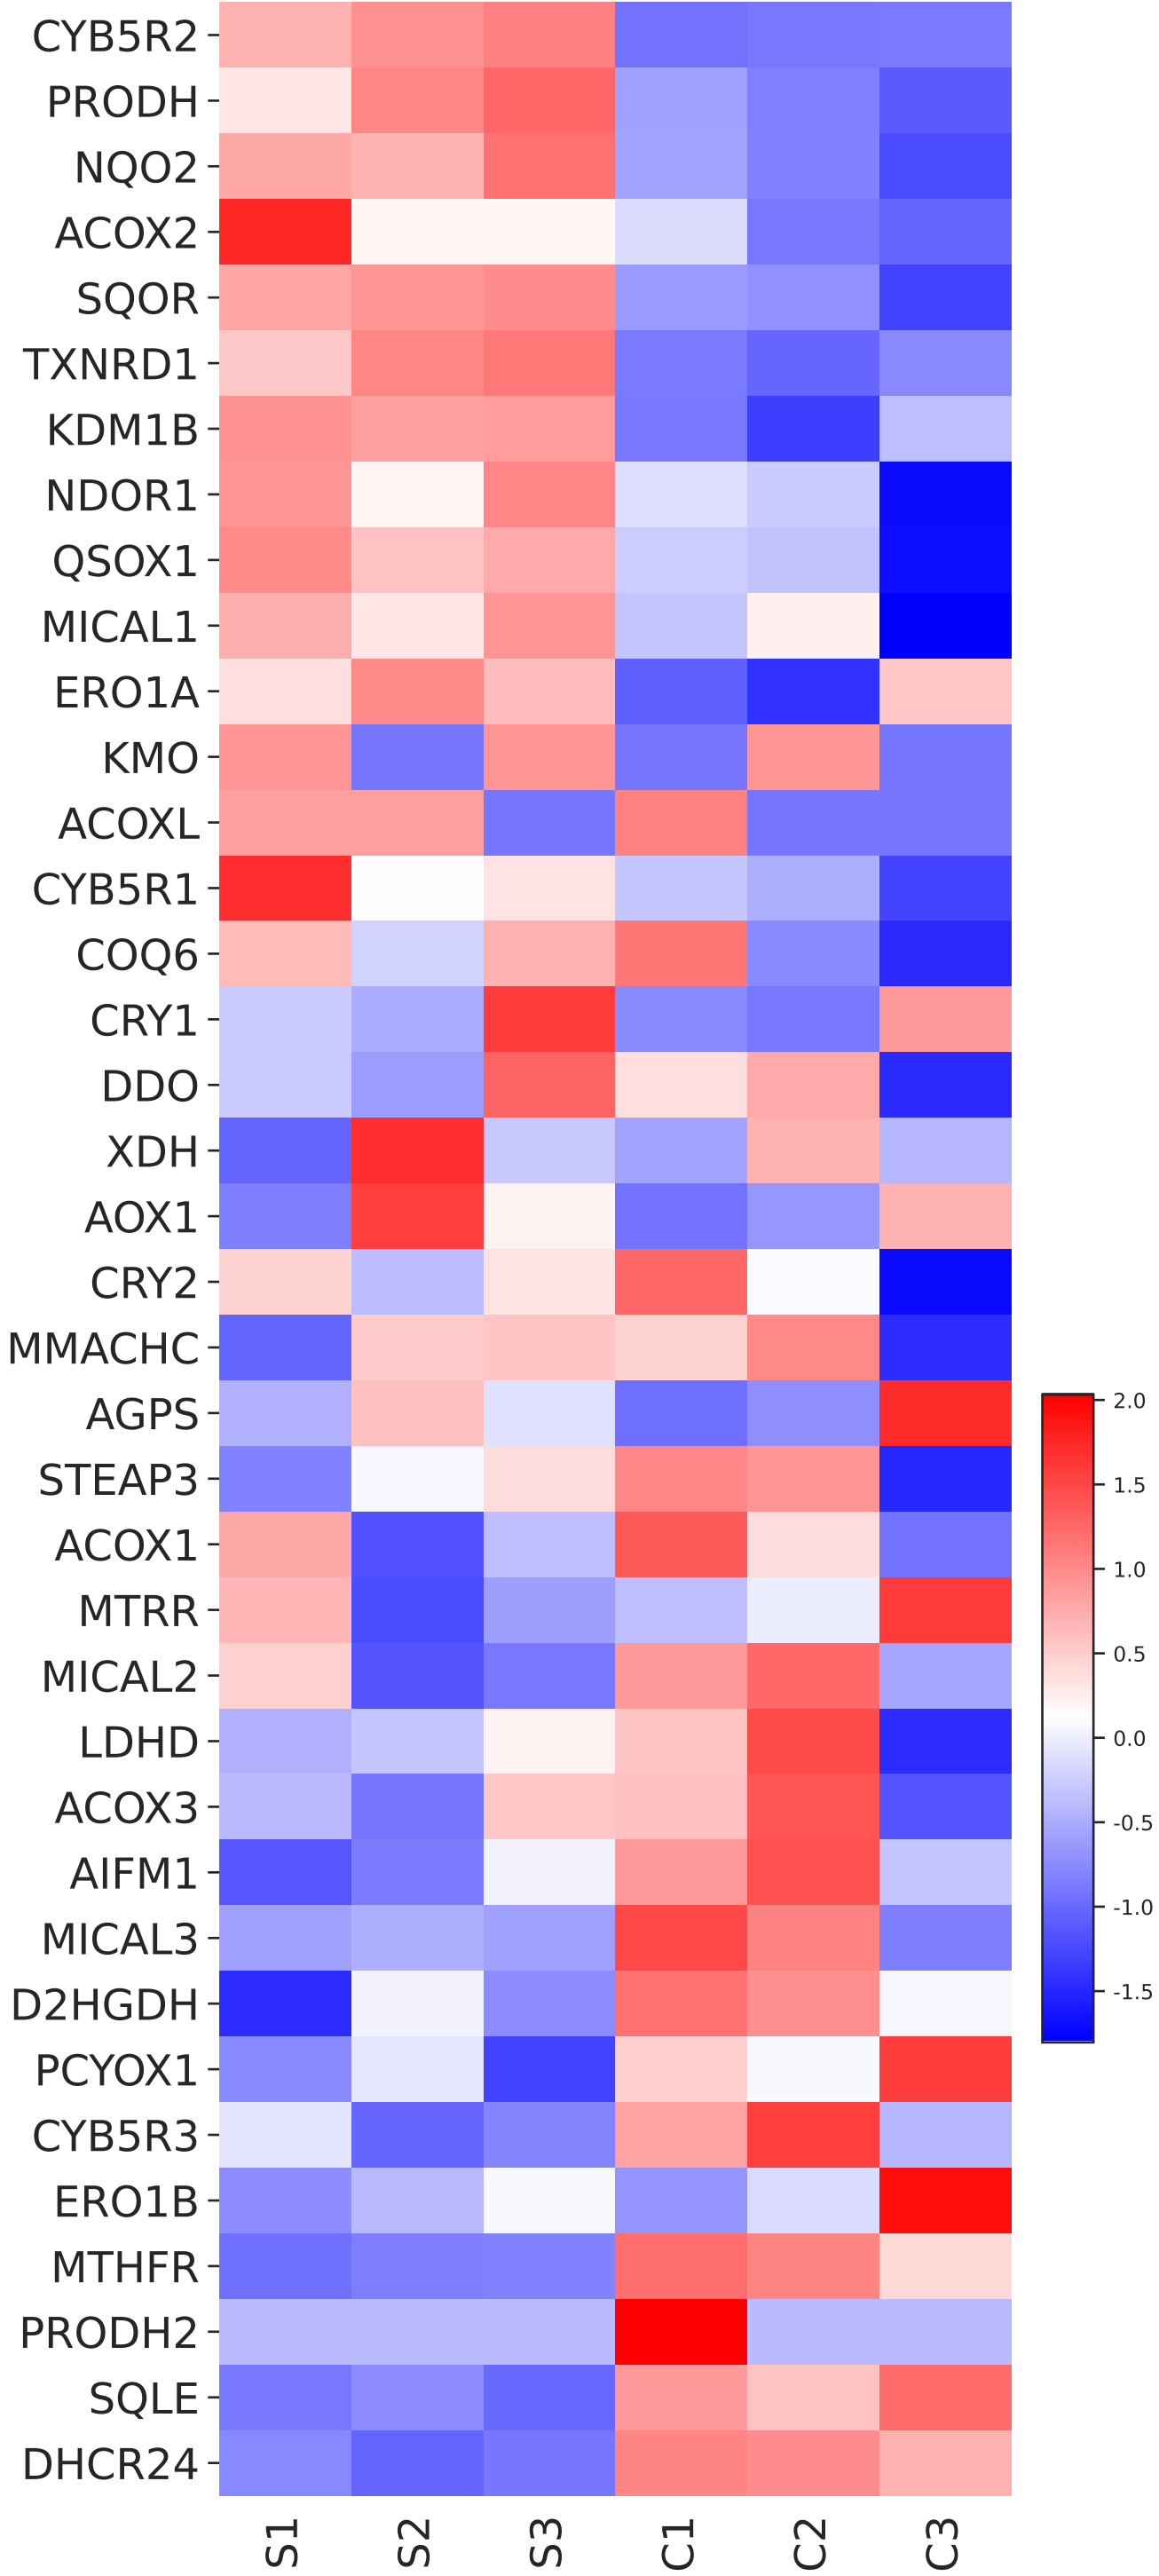

Supplement: Supplementary file 394 [file 6_FAD binding(GO_0071949).heatmap.pdf › Source data/1.RNA-Seq source data/2.HUVECs/result/1.6.GSEA/S-vs-C/go/MF/6_FAD binding(GO_0071949).heatmap.pdf]

# frizzled binding(GO:0005109)

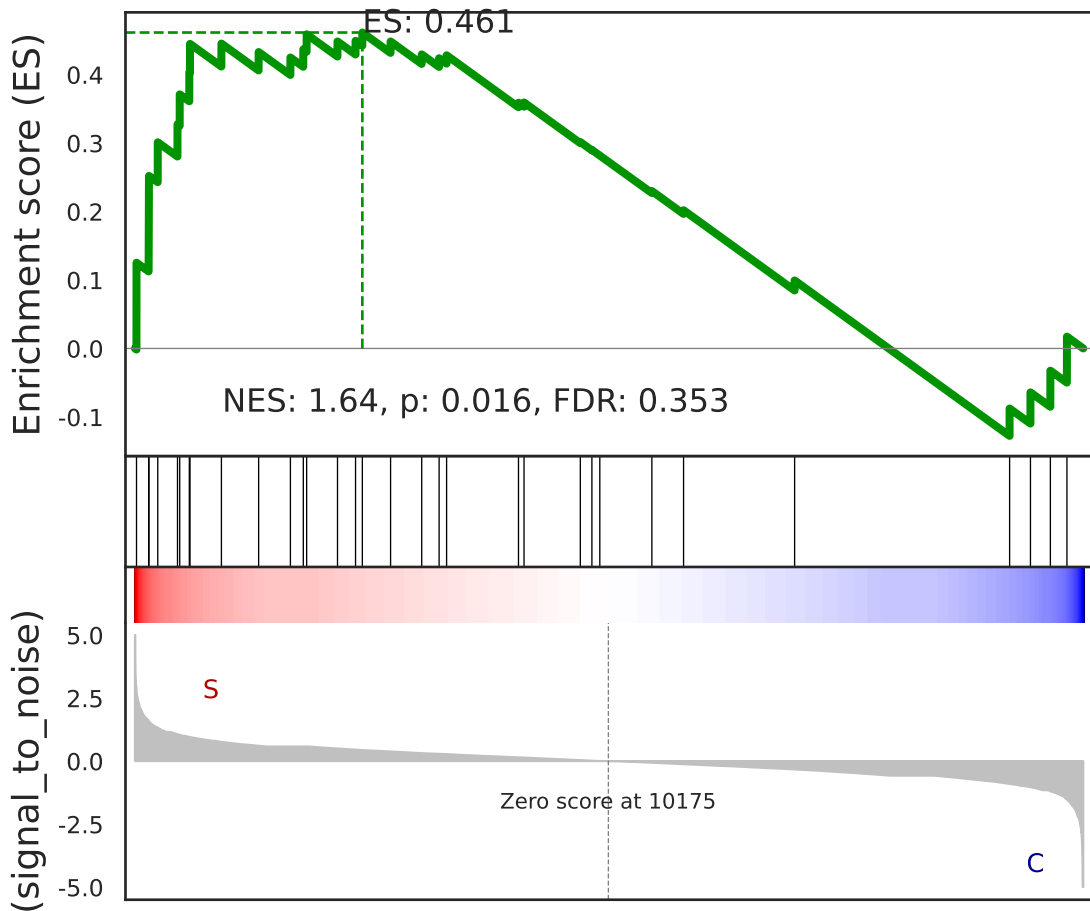

Supplement: Supplementary file 395 [file 7_frizzled binding(GO_0005109).gsea.pdf › Source data/1.RNA-Seq source data/2.HUVECs/result/1.6.GSEA/S-vs-C/go/MF/7_frizzled binding(GO_0005109).gsea.pdf]

frizzled binding(GO:0005109)  
Heatmap of the Analyzed GeneSet

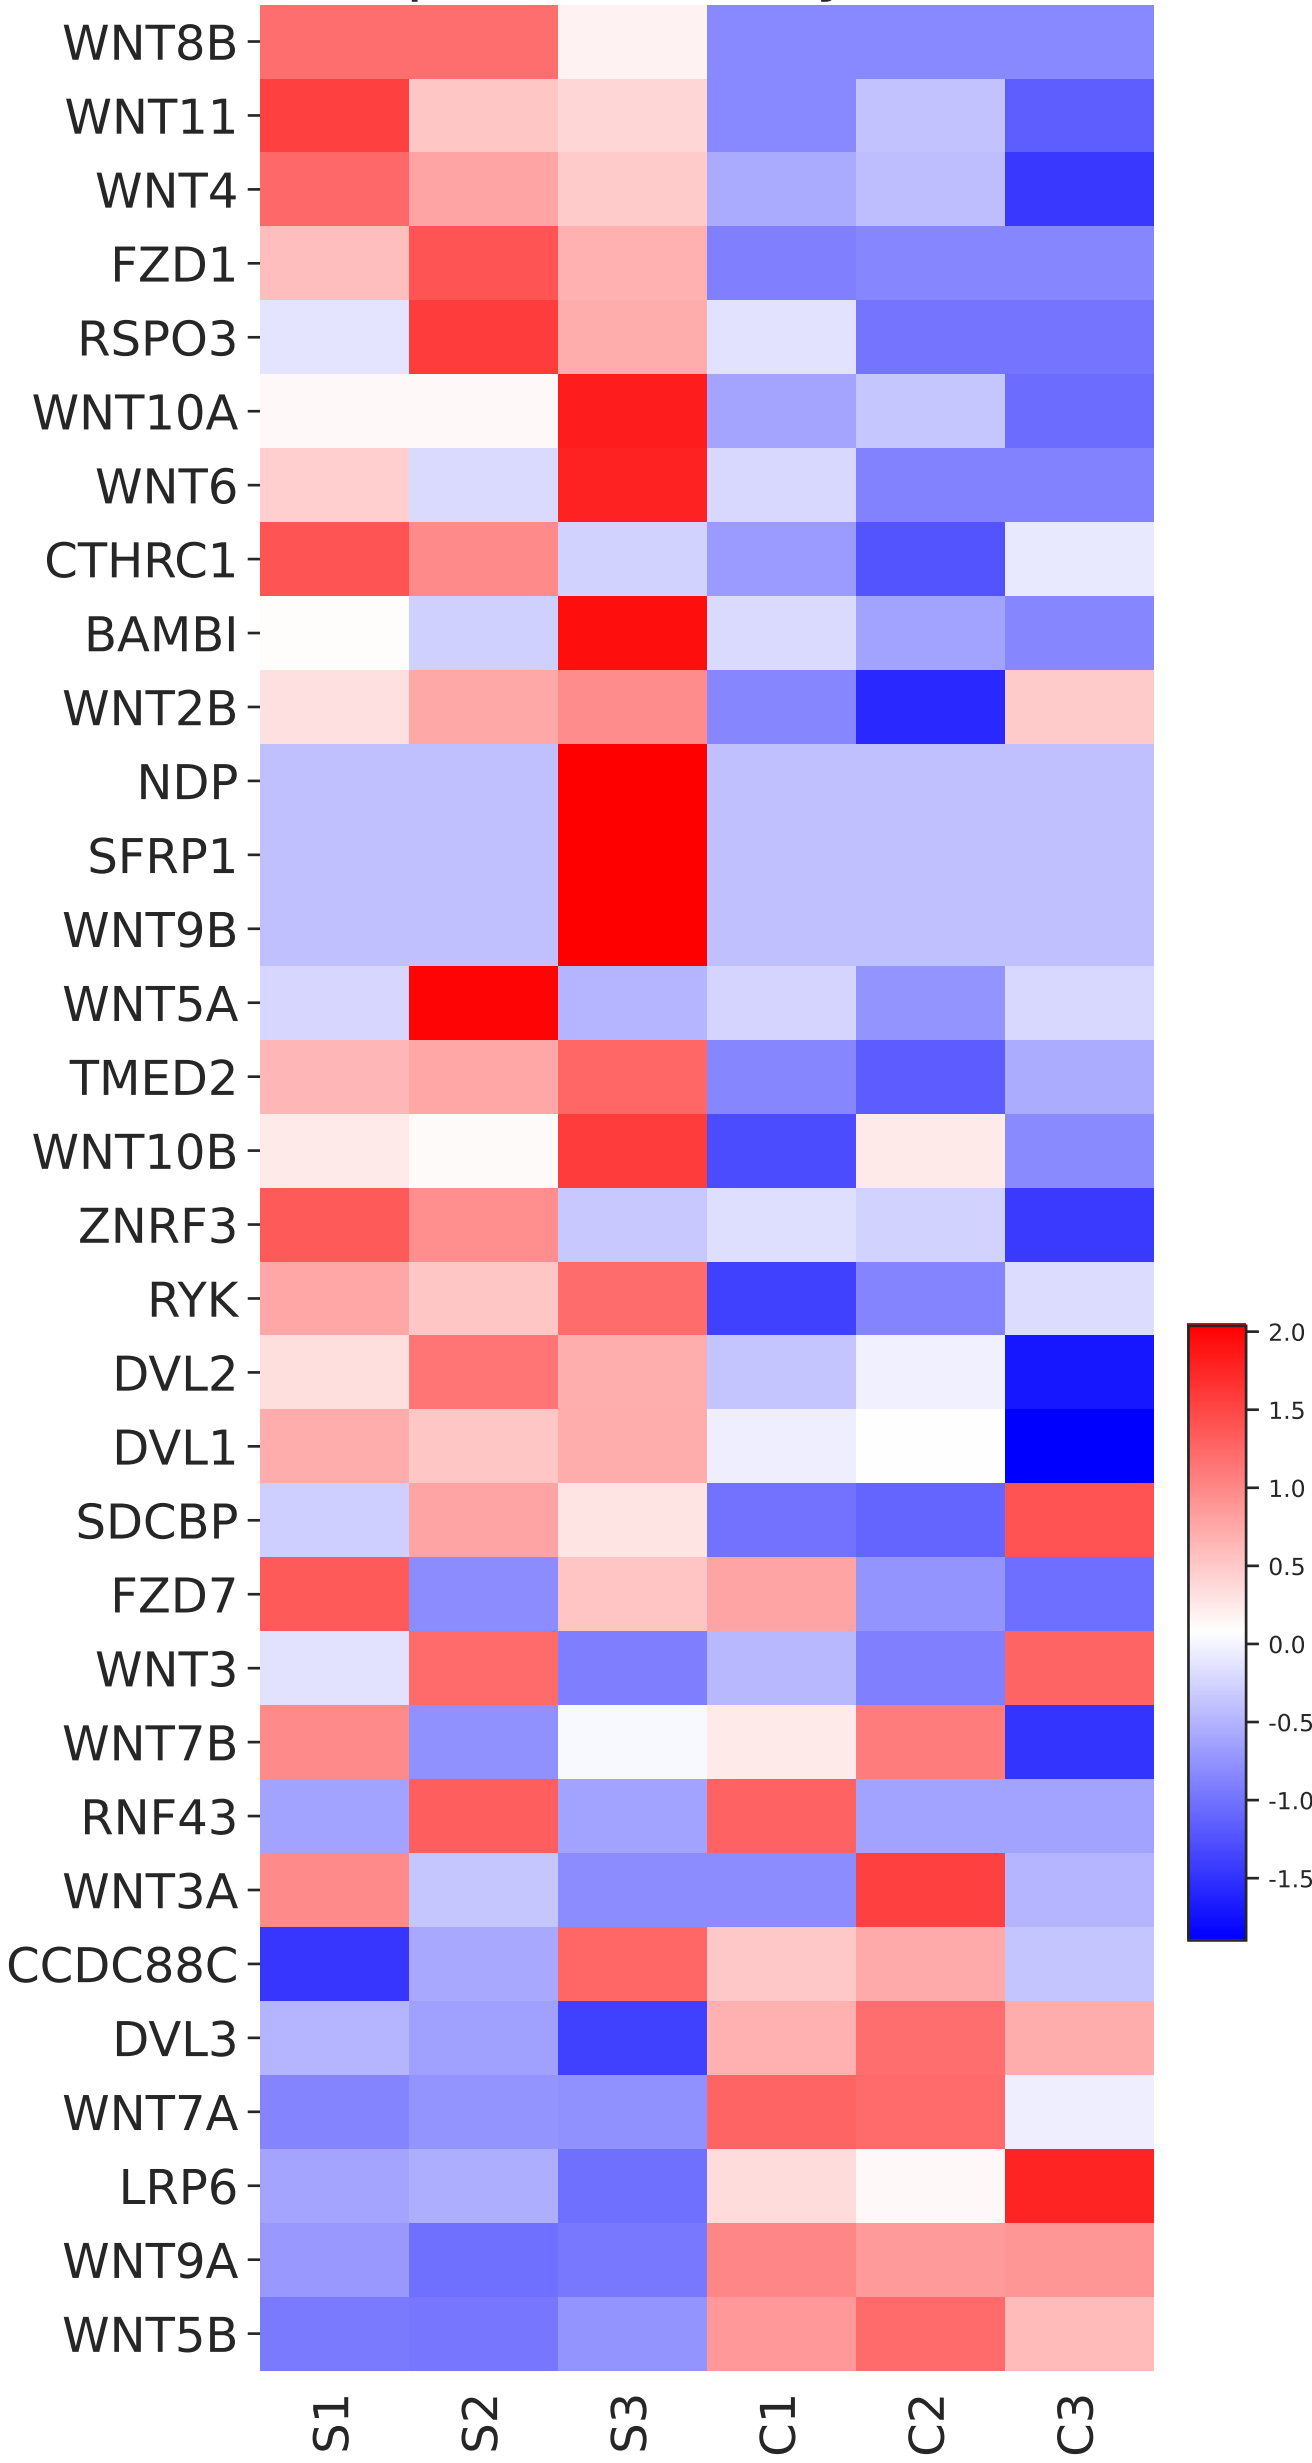

Supplement: Supplementary file 396 [file 7_frizzled binding(GO_0005109).heatmap.pdf › Source data/1.RNA-Seq source data/2.HUVECs/result/1.6.GSEA/S-vs-C/go/MF/7_frizzled binding(GO_0005109).heatmap.pdf]

**monocarboxylic acid transmembrane transporter activity(GO:0008028)**

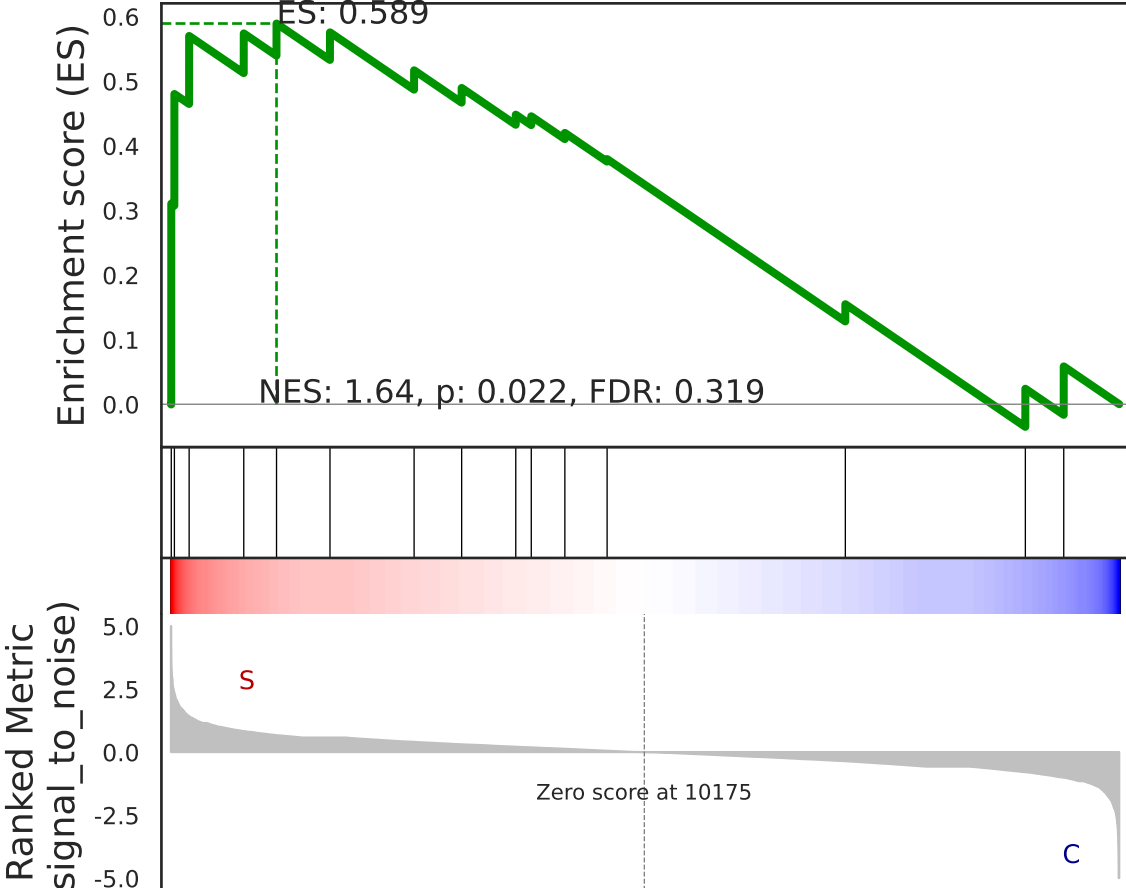

Supplement: Supplementary file 397 [file 8_monocarboxylic acid transmembrane transporter activity(GO_0008028).gsea.pdf › Source data/1.RNA-Seq source data/2.HUVECs/result/1.6.GSEA/S-vs-C/go/MF/8_monocarboxylic acid transmembrane transporter activity(GO_0008028).gsea.pdf]

monocarboxylic acid transmembrane transporter activity(GO:0008028)

Heatmap of the Analyzed GeneSet

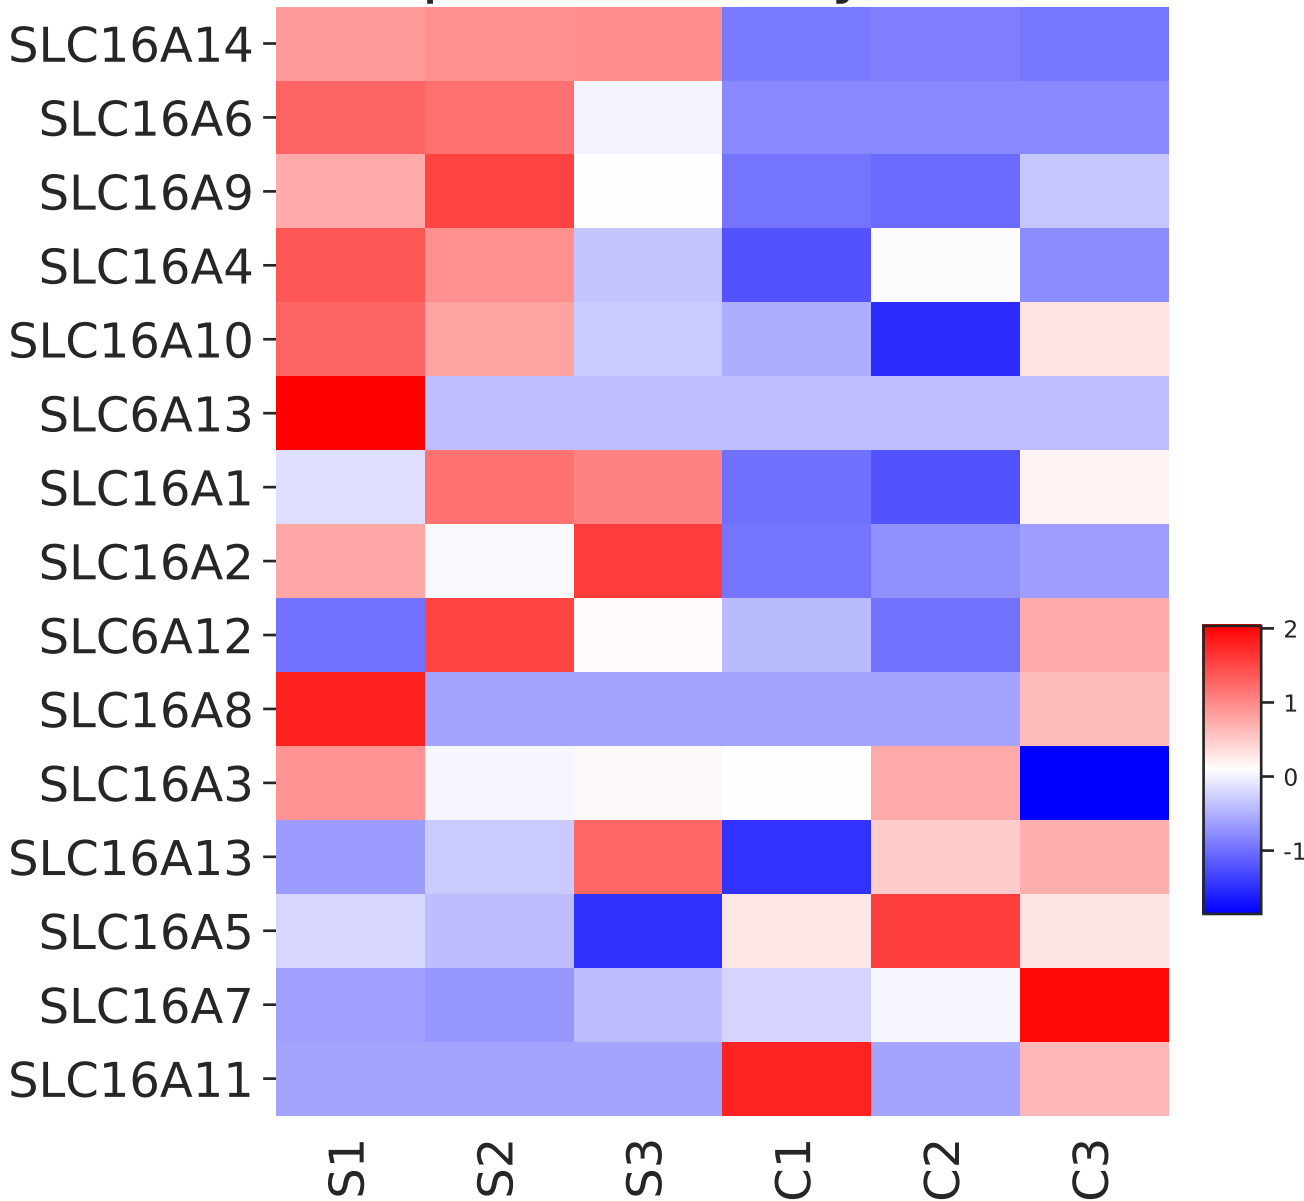

Supplement: Supplementary file 398 [file 8_monocarboxylic acid transmembrane transporter activity(GO_0008028).heatmap.pdf › Source data/1.RNA-Seq source data/2.HUVECs/result/1.6.GSEA/S-vs-C/go/MF/8_monocarboxylic acid transmembrane transporter activity(GO_0008028).heatmap.pdf]

# DNA polymerase binding(GO:0070182)

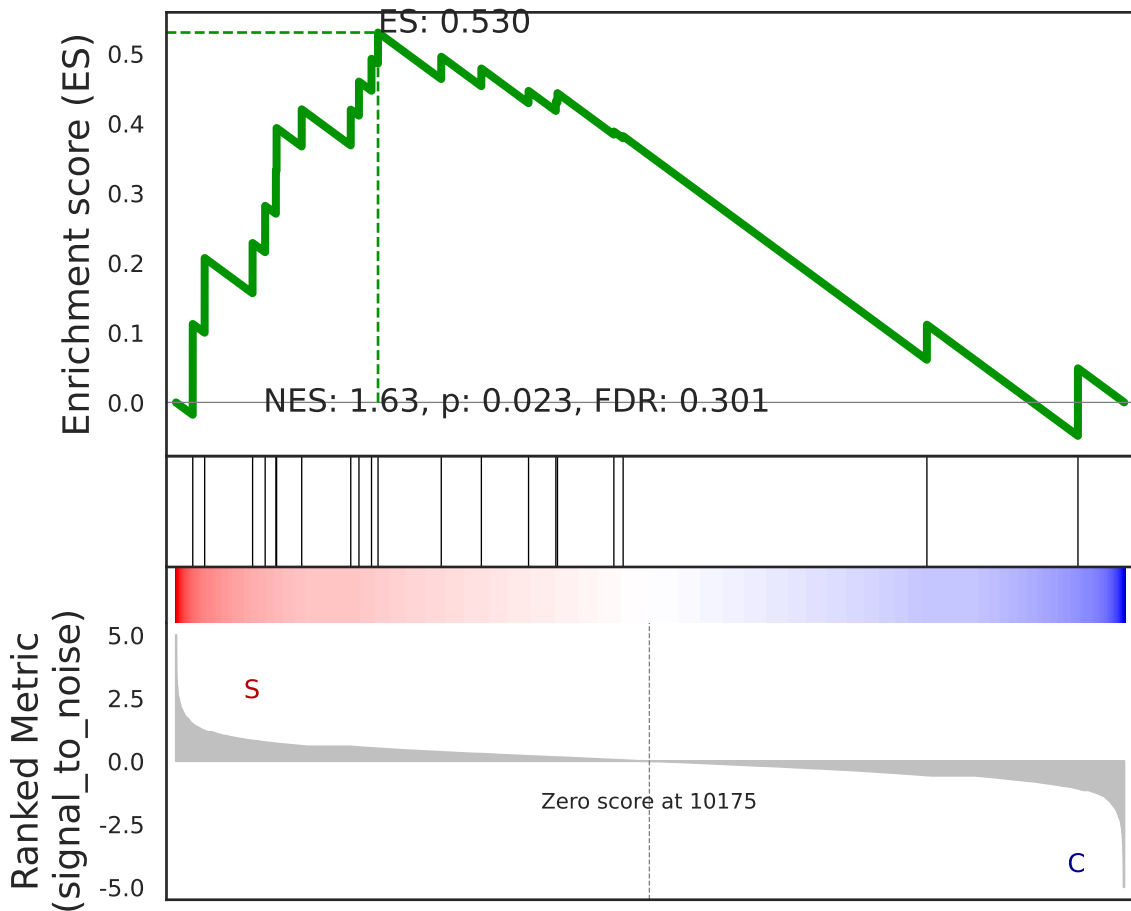

Supplement: Supplementary file 399 [file 9_DNA polymerase binding(GO_0070182).gsea.pdf › Source data/1.RNA-Seq source data/2.HUVECs/result/1.6.GSEA/S-vs-C/go/MF/9_DNA polymerase binding(GO_0070182).gsea.pdf]

# DNA polymerase binding(GO:0070182)

## Heatmap of the Analyzed GeneSet

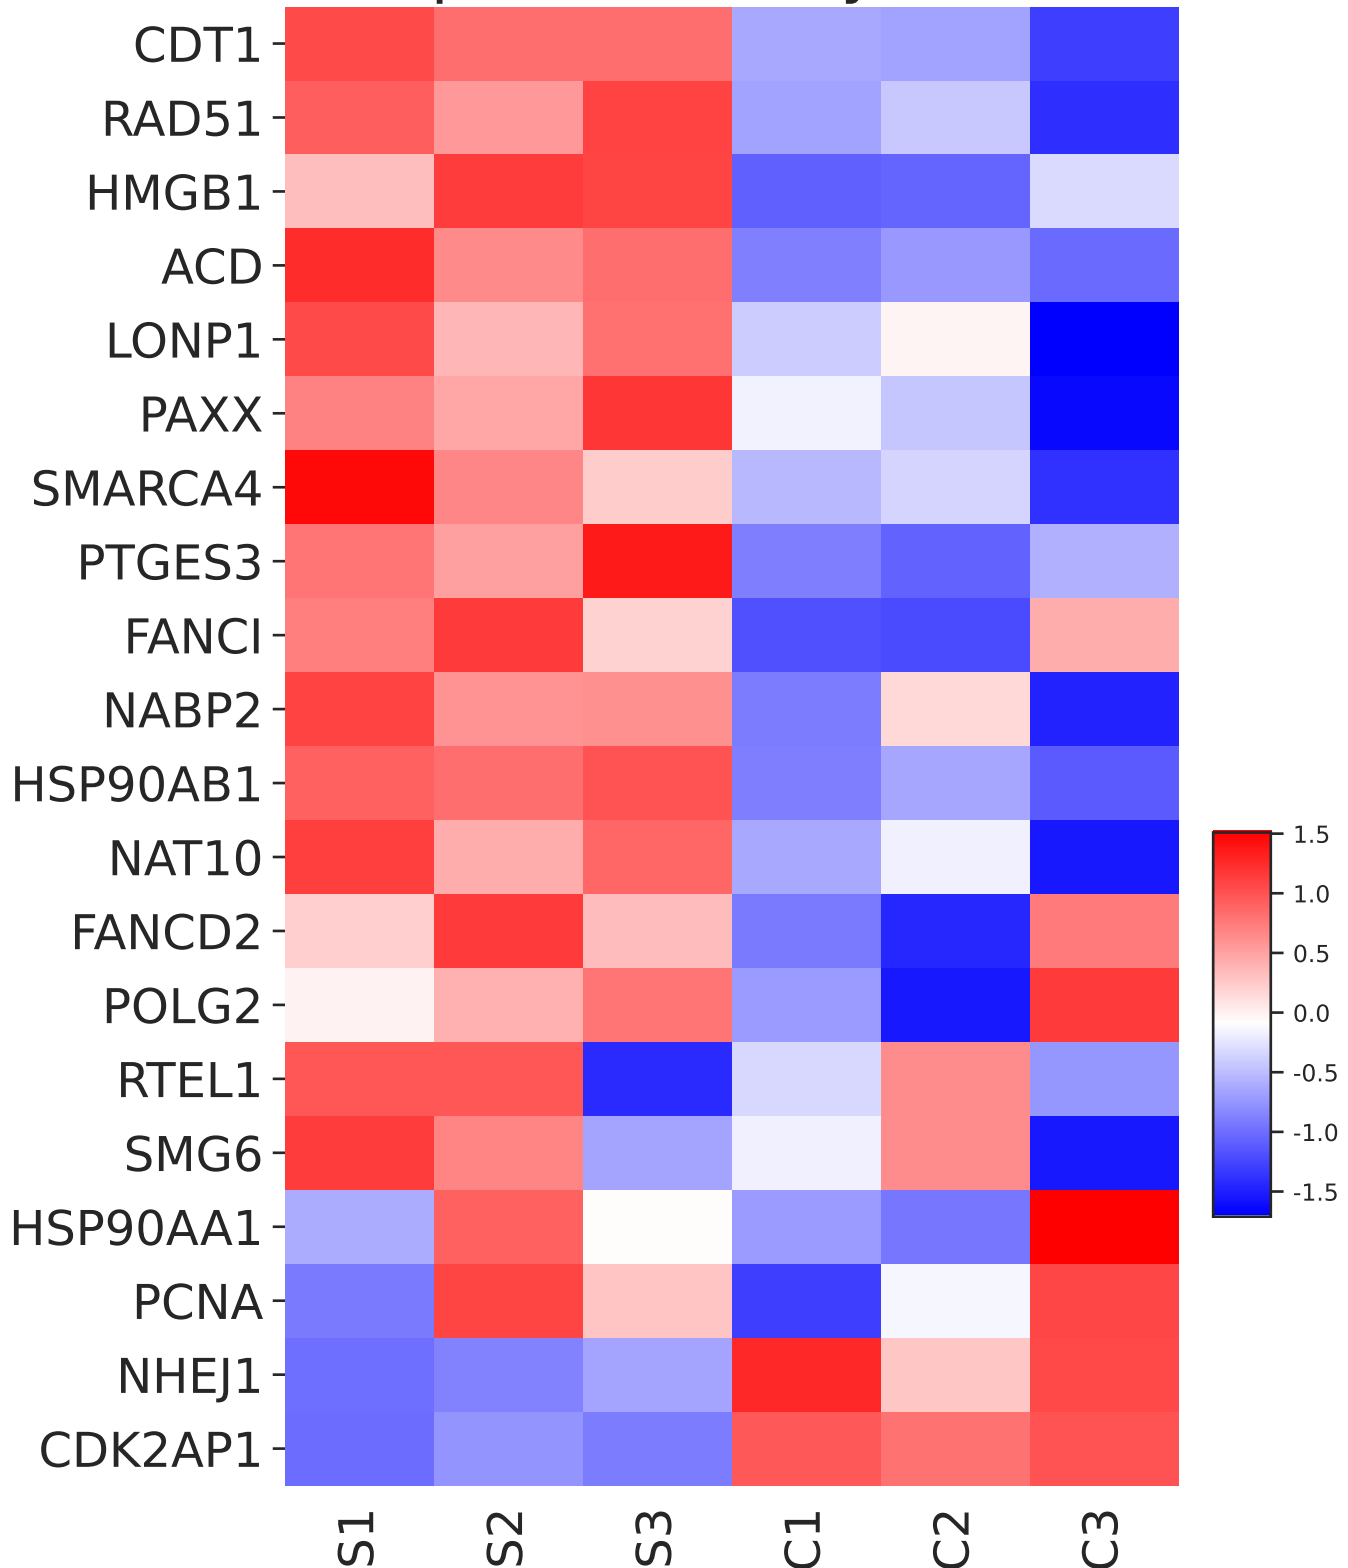

Supplement: Supplementary file 400 [file 9_DNA polymerase binding(GO_0070182).heatmap.pdf › Source data/1.RNA-Seq source data/2.HUVECs/result/1.6.GSEA/S-vs-C/go/MF/9_DNA polymerase binding(GO_0070182).heatmap.pdf]

# Pyrimidine metabolism(hsa00240)

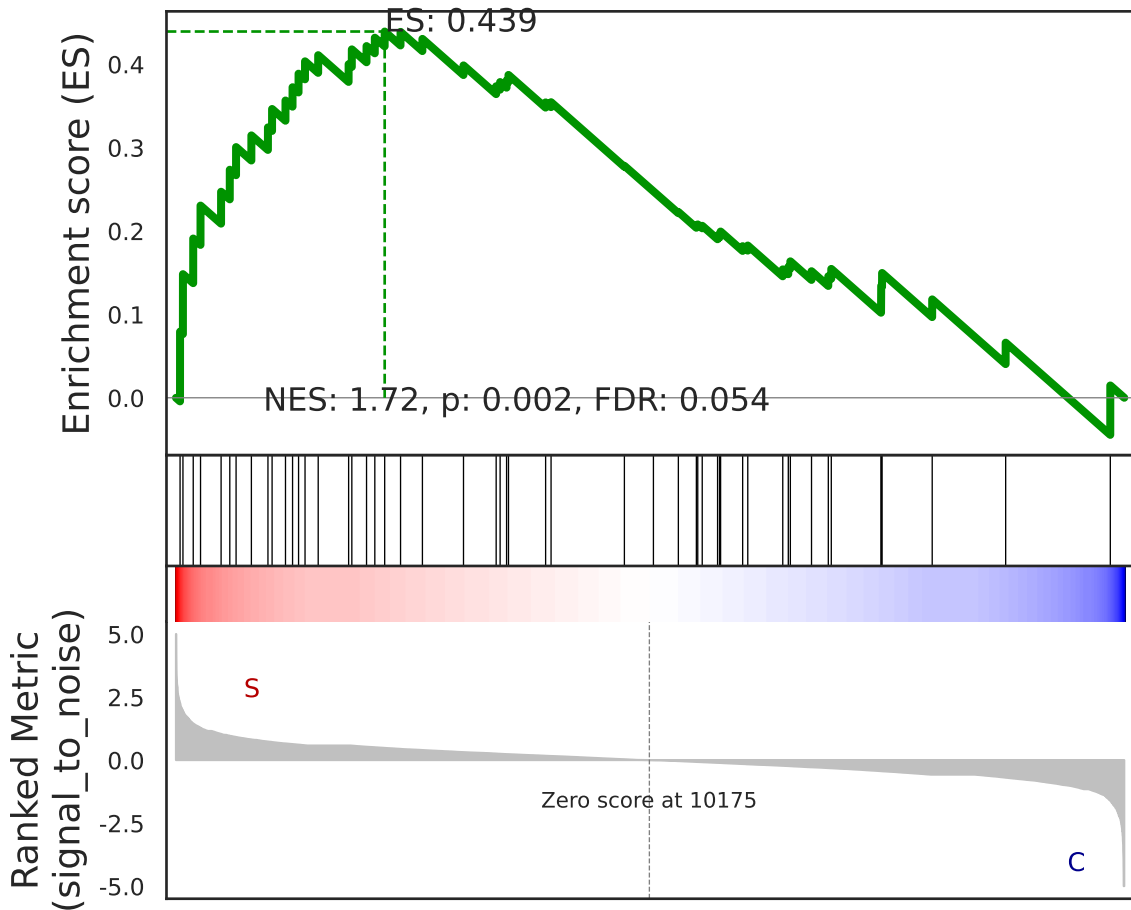

Supplement: Supplementary file 401 [file 10_Pyrimidine metabolism(hsa00240).gsea.pdf › Source data/1.RNA-Seq source data/2.HUVECs/result/1.6.GSEA/S-vs-C/kegg/10_Pyrimidine metabolism(hsa00240).gsea.pdf]

Pyrimidine metabolism(hsa00240)  
Heatmap of the Analyzed GeneSet

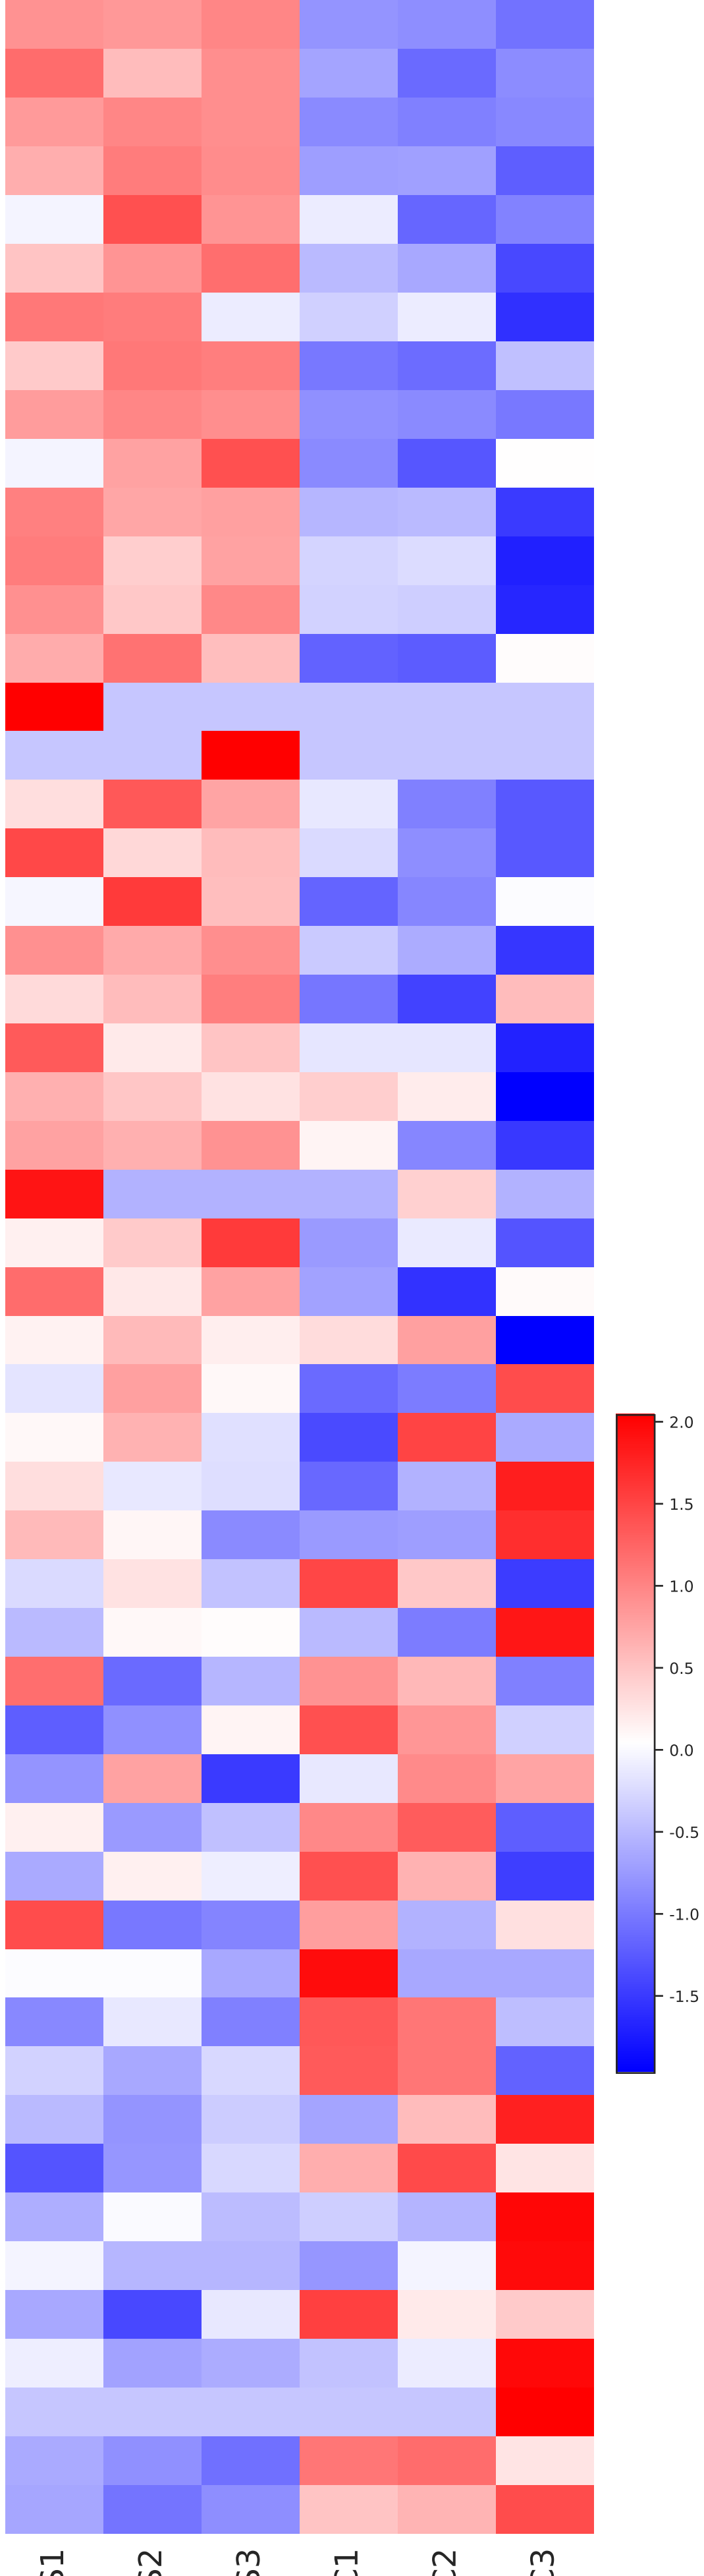

Supplement: Supplementary file 402 [file 10_Pyrimidine metabolism(hsa00240).heatmap.pdf › Source data/1.RNA-Seq source data/2.HUVECs/result/1.6.GSEA/S-vs-C/kegg/10_Pyrimidine metabolism(hsa00240).heatmap.pdf]

# Ribosome(hsa03010)

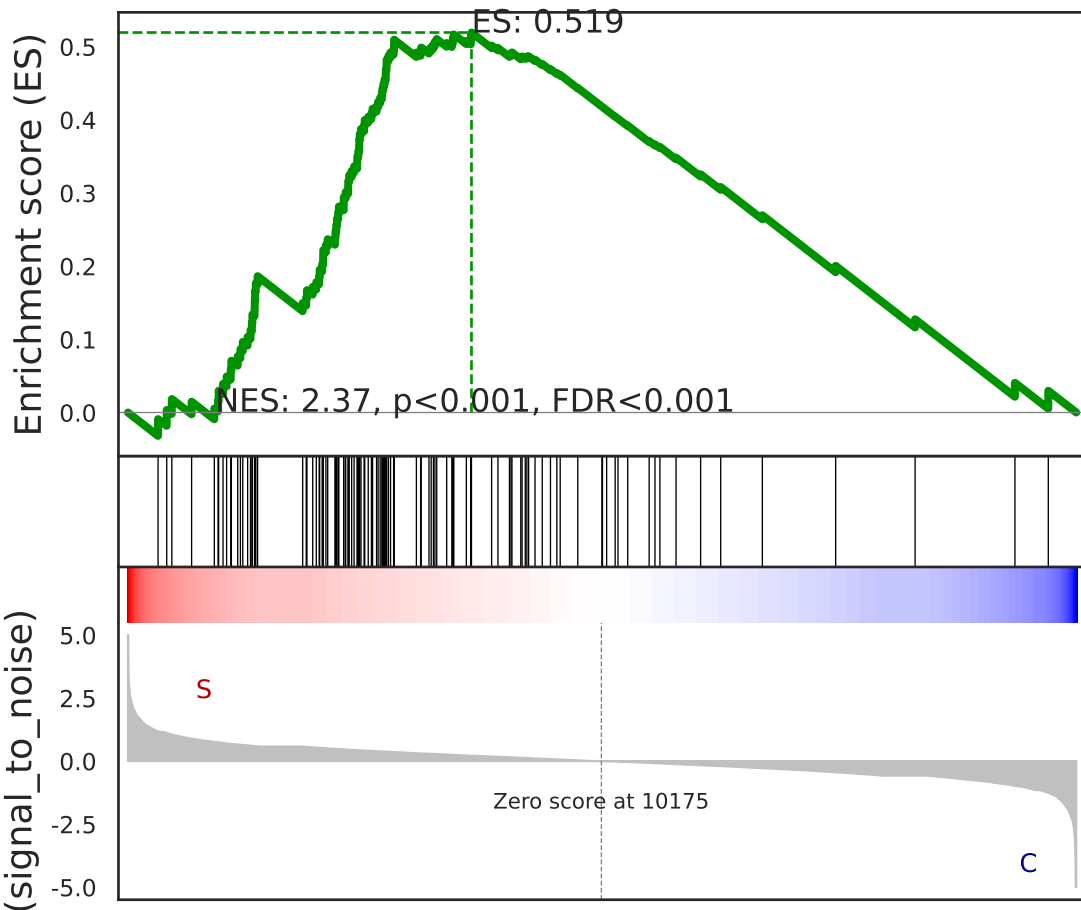

Supplement: Supplementary file 403 [file 1_Ribosome(hsa03010).gsea.pdf › Source data/1.RNA-Seq source data/2.HUVECs/result/1.6.GSEA/S-vs-C/kegg/1_Ribosome(hsa03010).gsea.pdf]

# Ribosome(hsa03010)

## Heatmap of the Analyzed GeneSet

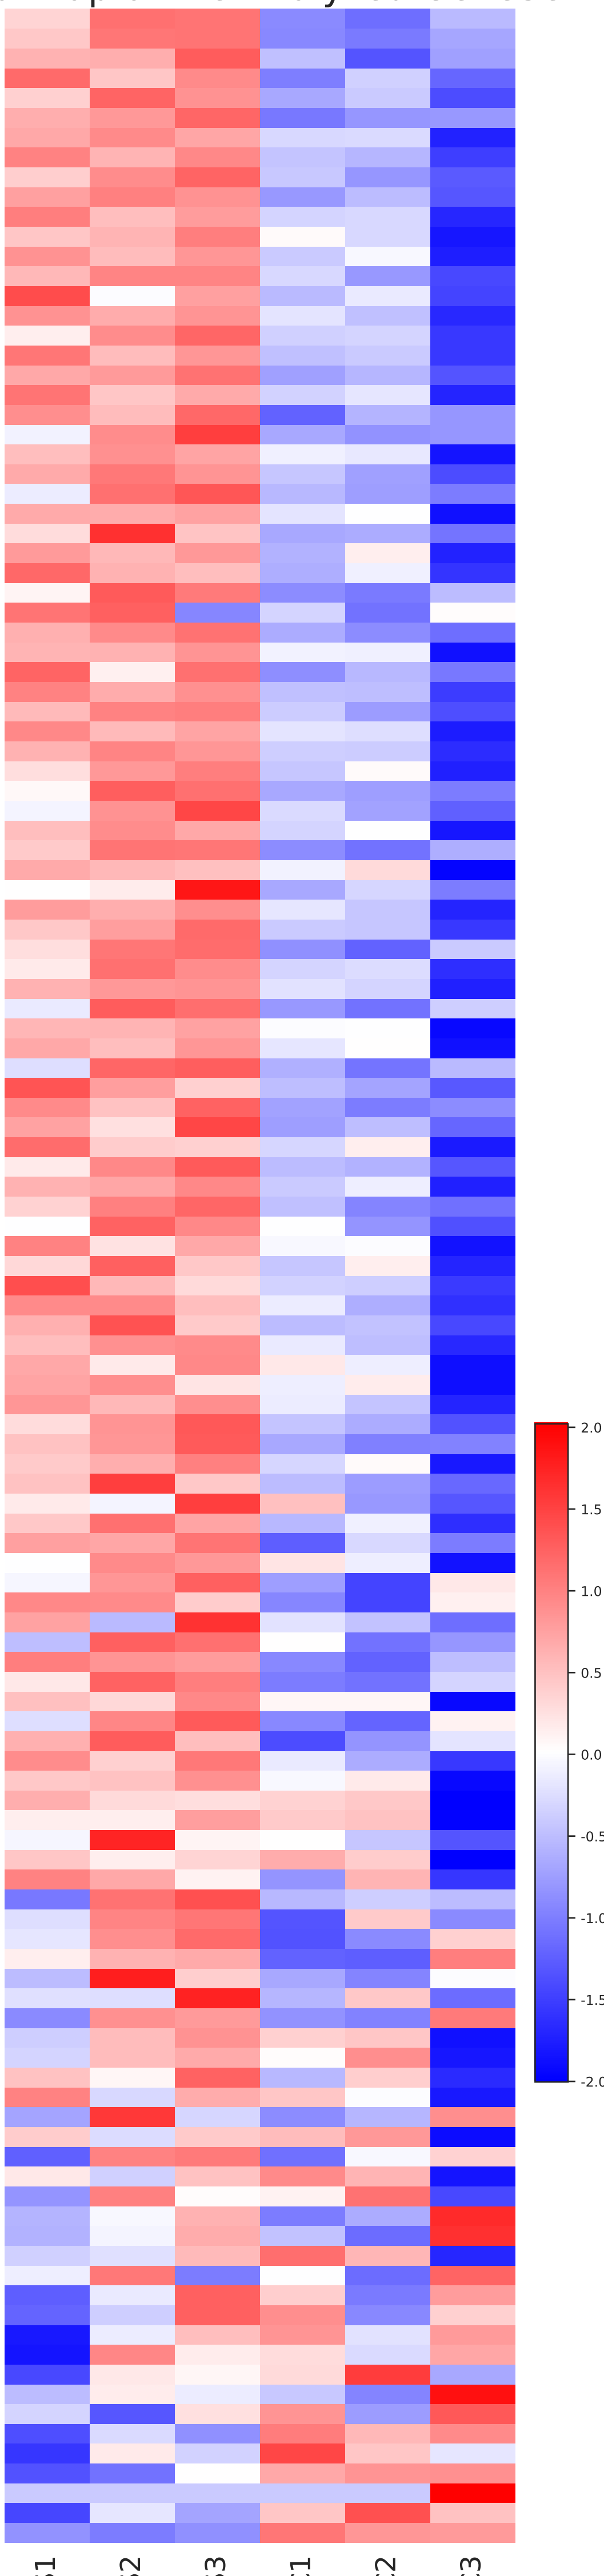

Supplement: Supplementary file 404 [file 1_Ribosome(hsa03010).heatmap.pdf › Source data/1.RNA-Seq source data/2.HUVECs/result/1.6.GSEA/S-vs-C/kegg/1_Ribosome(hsa03010).heatmap.pdf]

# Aminoacyl-tRNA biosynthesis(hsa00970)

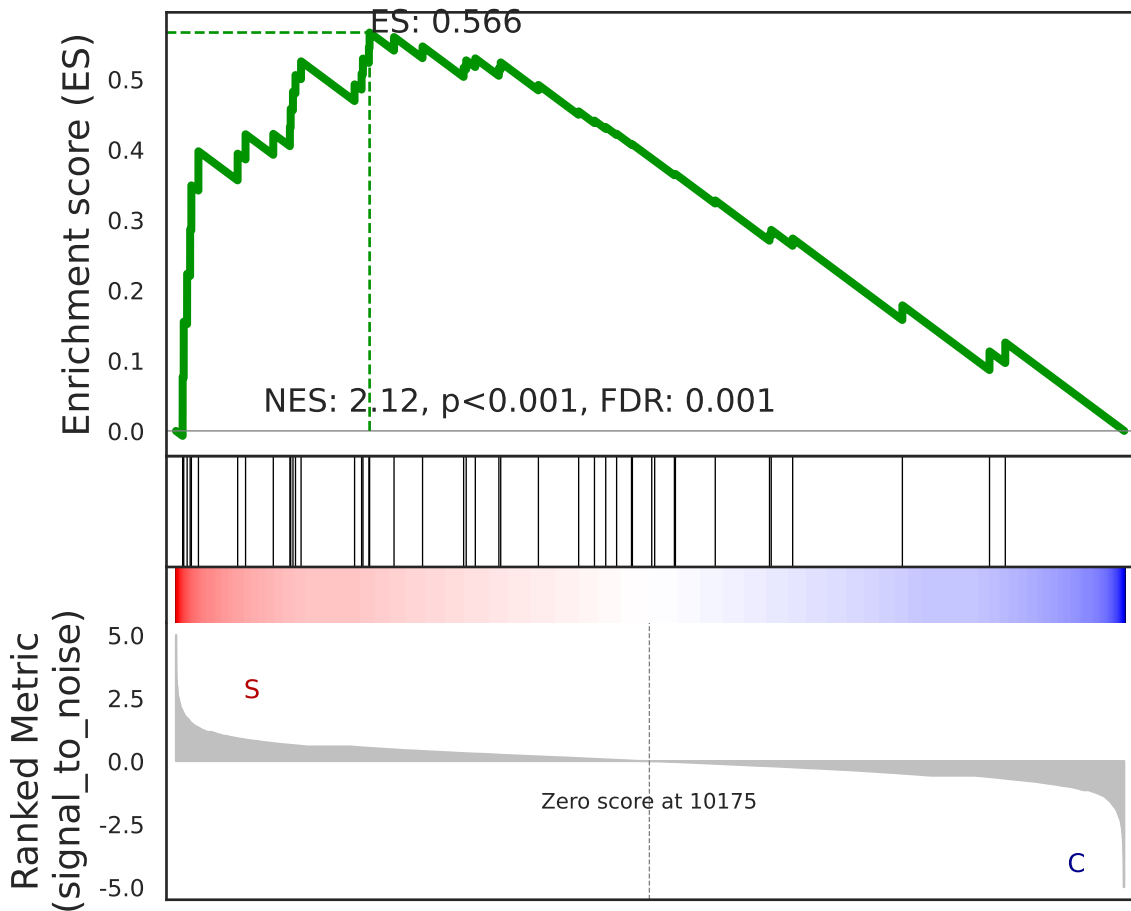

Supplement: Supplementary file 405 [file 2_Aminoacyl-tRNA biosynthesis(hsa00970).gsea.pdf › Source data/1.RNA-Seq source data/2.HUVECs/result/1.6.GSEA/S-vs-C/kegg/2_Aminoacyl-tRNA biosynthesis(hsa00970).gsea.pdf]

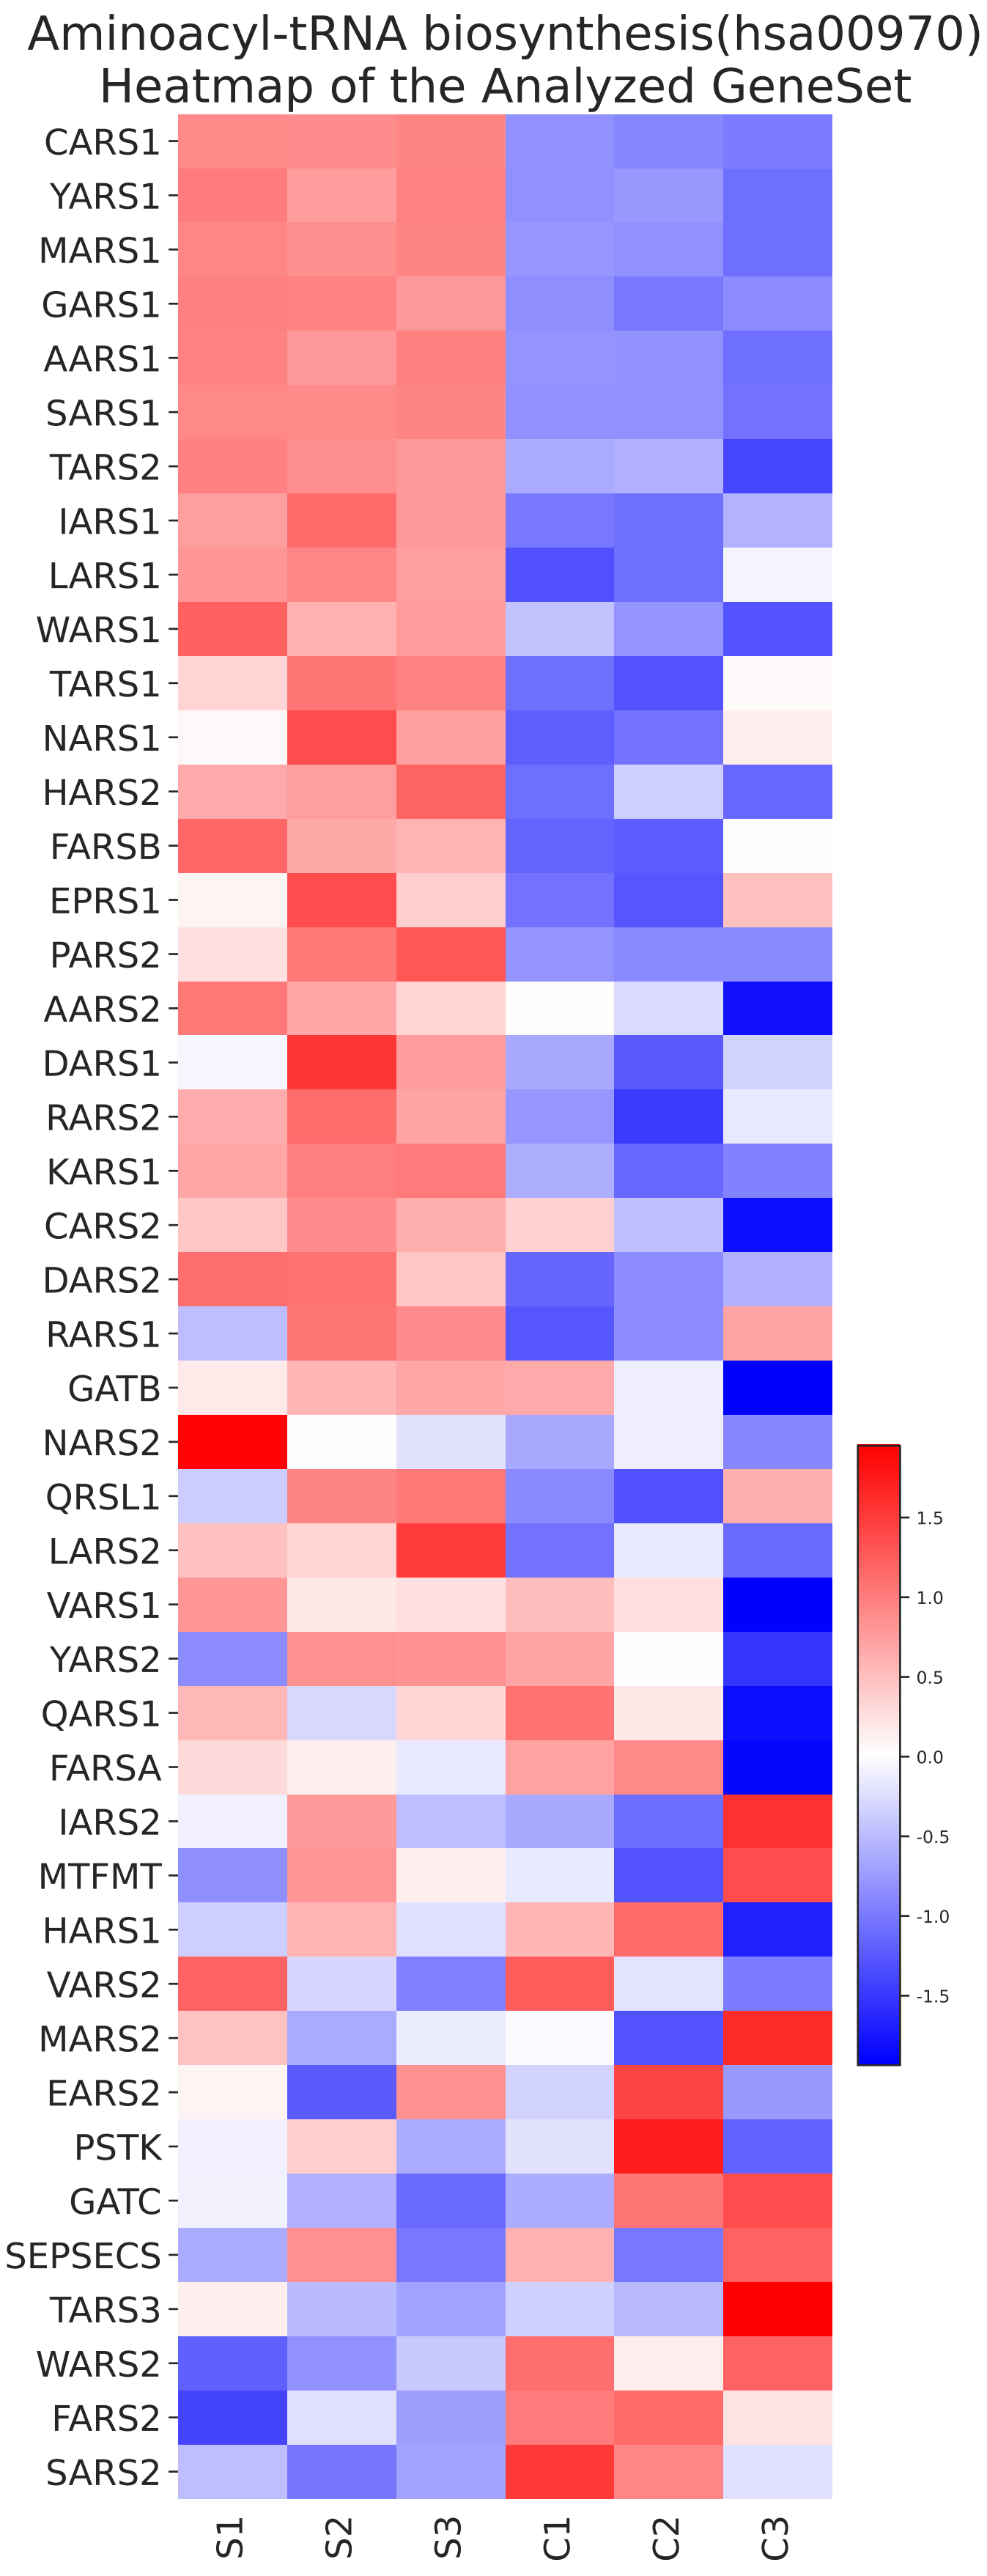

Supplement: Supplementary file 406 [file 2_Aminoacyl-tRNA biosynthesis(hsa00970).heatmap.pdf › Source data/1.RNA-Seq source data/2.HUVECs/result/1.6.GSEA/S-vs-C/kegg/2_Aminoacyl-tRNA biosynthesis(hsa00970).heatmap.pdf]

# Steroid biosynthesis(hsa00100)

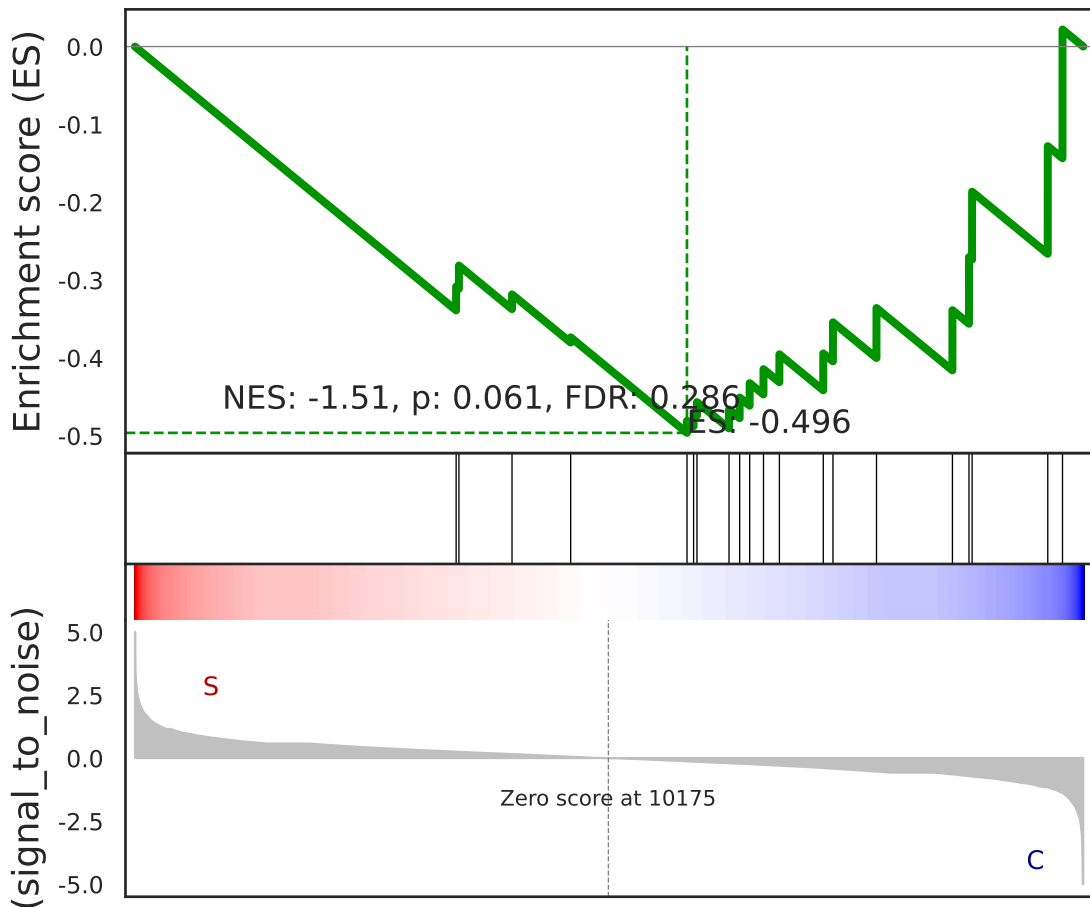

Supplement: Supplementary file 407 [file 309_Steroid biosynthesis(hsa00100).gsea.pdf › Source data/1.RNA-Seq source data/2.HUVECs/result/1.6.GSEA/S-vs-C/kegg/309_Steroid biosynthesis(hsa00100).gsea.pdf]

# Steroid biosynthesis(hsa00100)

## Heatmap of the Analyzed GeneSet

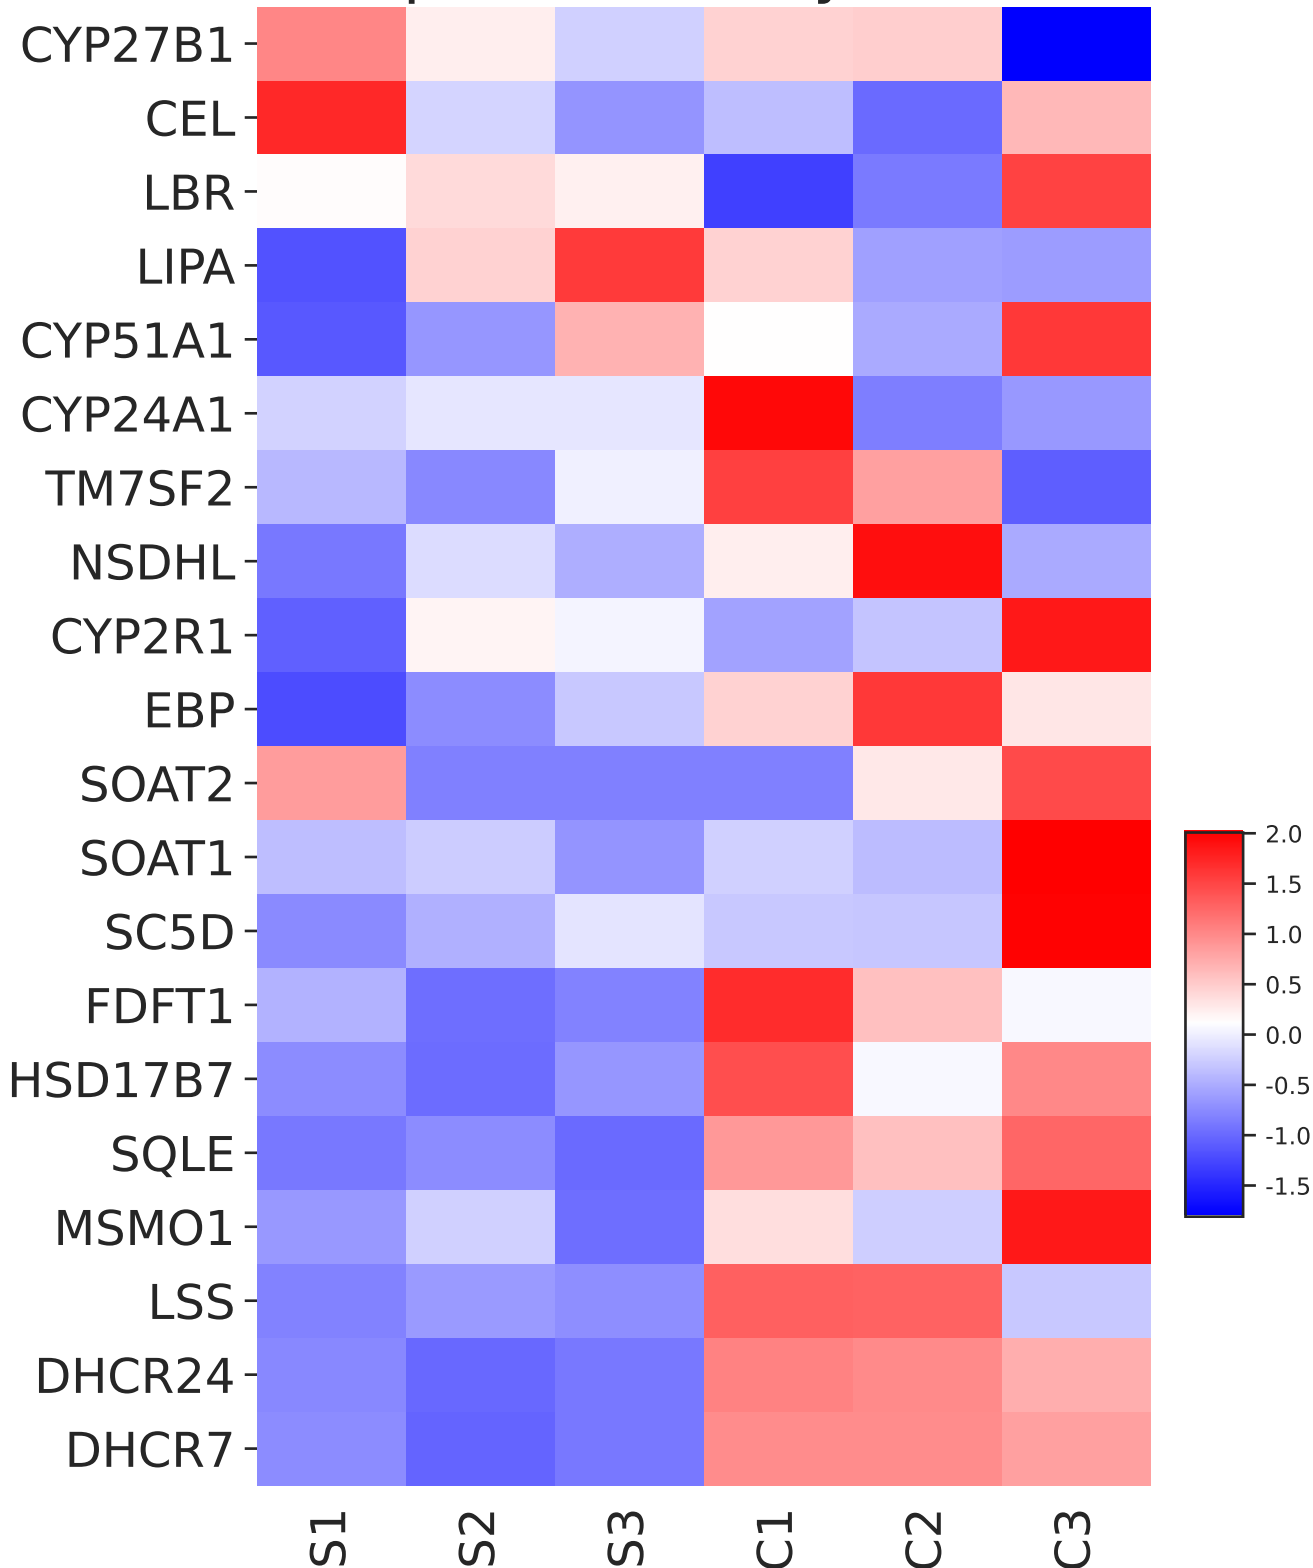

Supplement: Supplementary file 408 [file 309_Steroid biosynthesis(hsa00100).heatmap.pdf › Source data/1.RNA-Seq source data/2.HUVECs/result/1.6.GSEA/S-vs-C/kegg/309_Steroid biosynthesis(hsa00100).heatmap.pdf]
