# Supplementary figures and images for: Peptide-based Self-adaptive Implant Coating Sequentially Regulates Bone Regeneration to Enhance Interfacial Osseointegration (part 5 of 6)
Source: Research Square preprint supplement (doi:10.21203/rs.3.rs-5132912/v1), 2024-10-01

# ECM-receptor interaction(hsa04512)

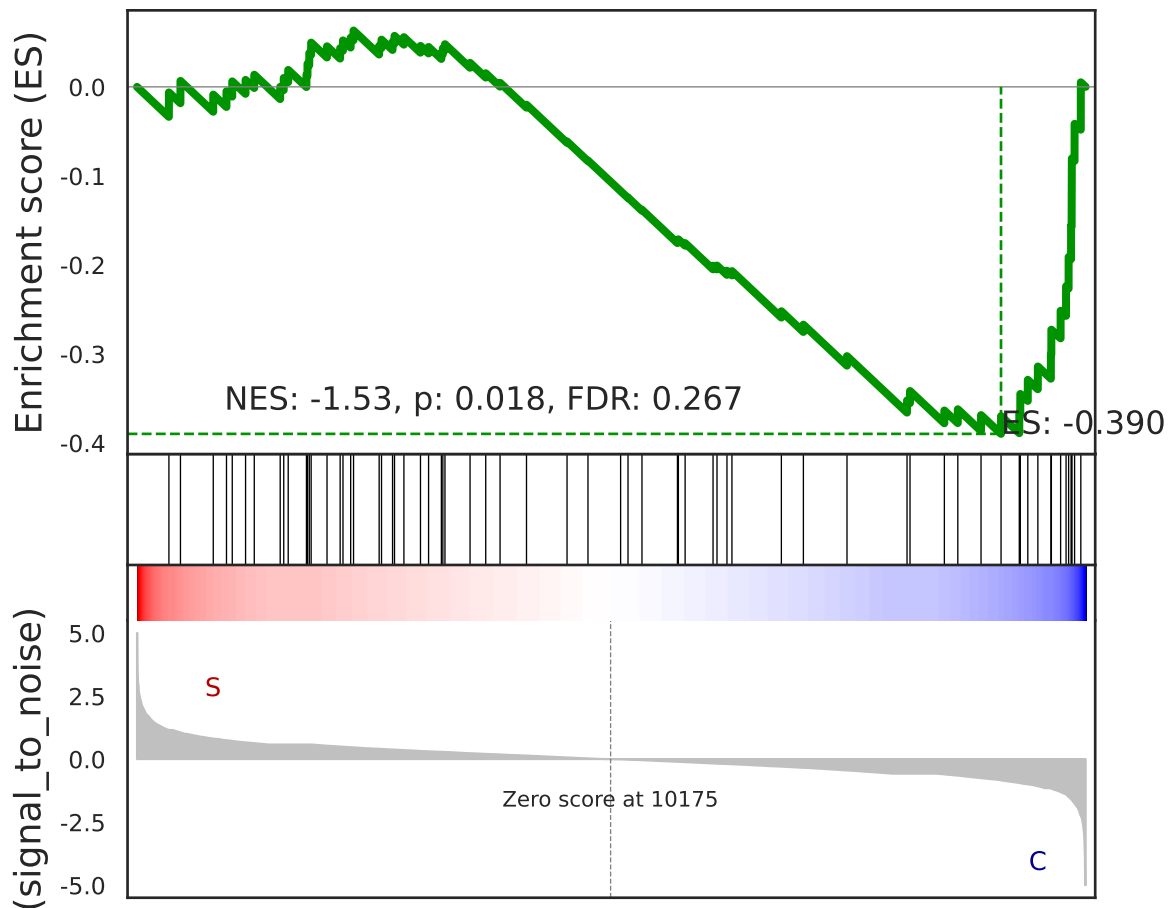

Supplement: Supplementary file 409 [file 310_ECM-receptor interaction(hsa04512).gsea.pdf › Source data/1.RNA-Seq source data/2.HUVECs/result/1.6.GSEA/S-vs-C/kegg/310_ECM-receptor interaction(hsa04512).gsea.pdf]

ECM-receptor interaction(hsa04512)  
Heatmap of the Analyzed GeneSet

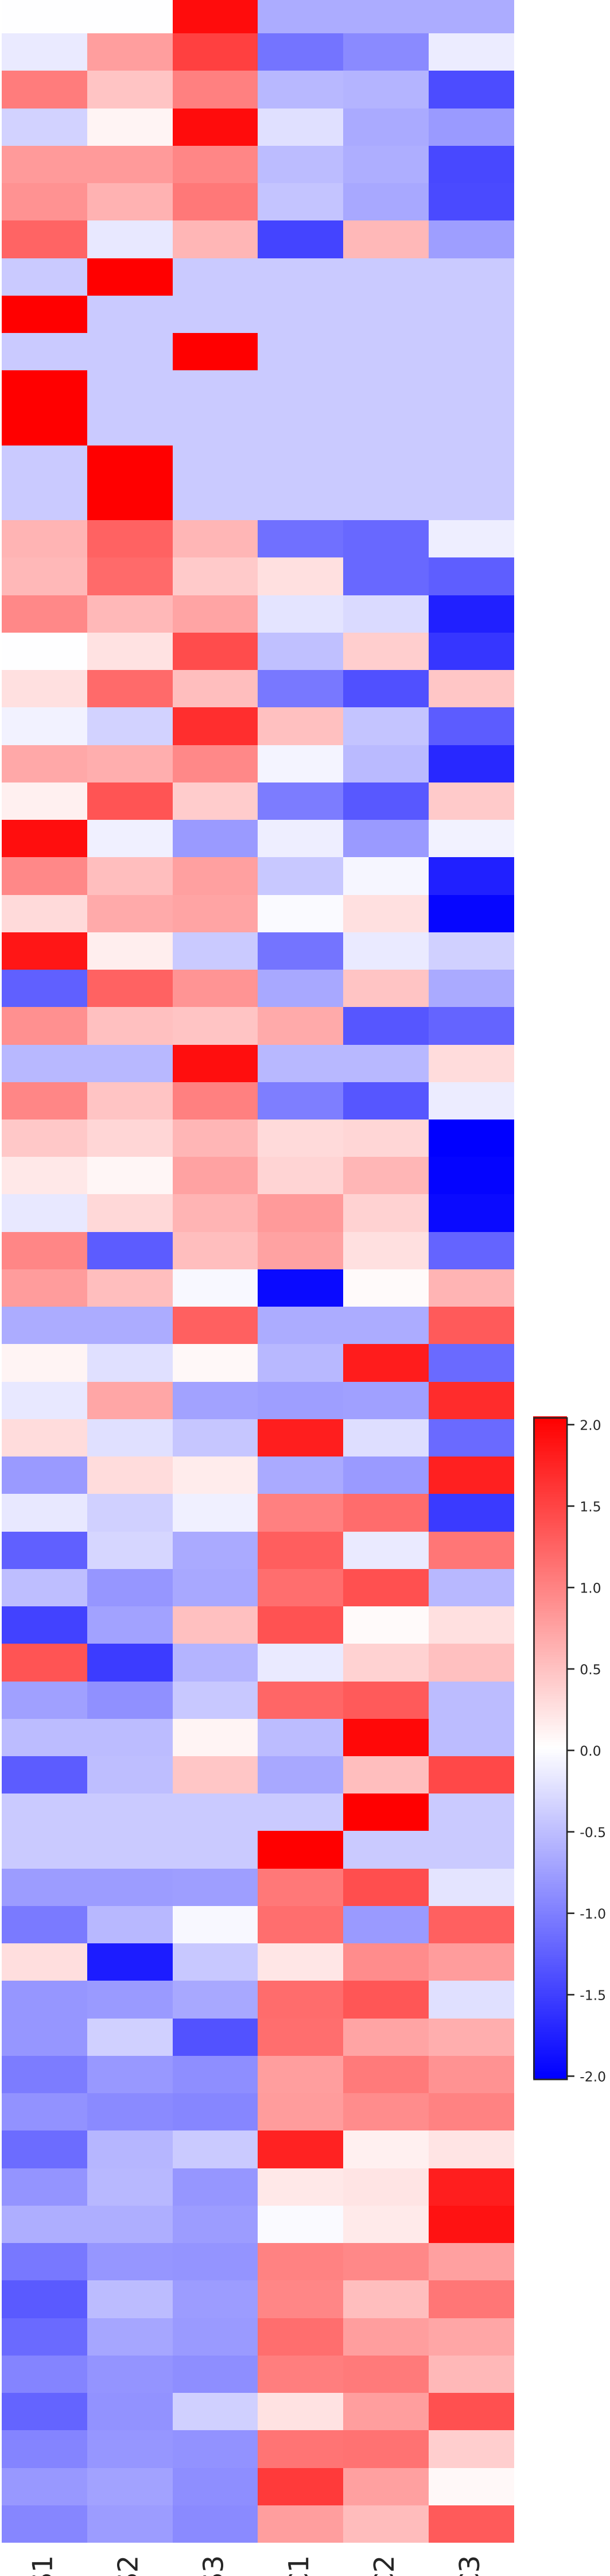

Supplement: Supplementary file 410 [file 310_ECM-receptor interaction(hsa04512).heatmap.pdf › Source data/1.RNA-Seq source data/2.HUVECs/result/1.6.GSEA/S-vs-C/kegg/310_ECM-receptor interaction(hsa04512).heatmap.pdf]

# ATP-dependent chromatin remodeling(hsa03082)

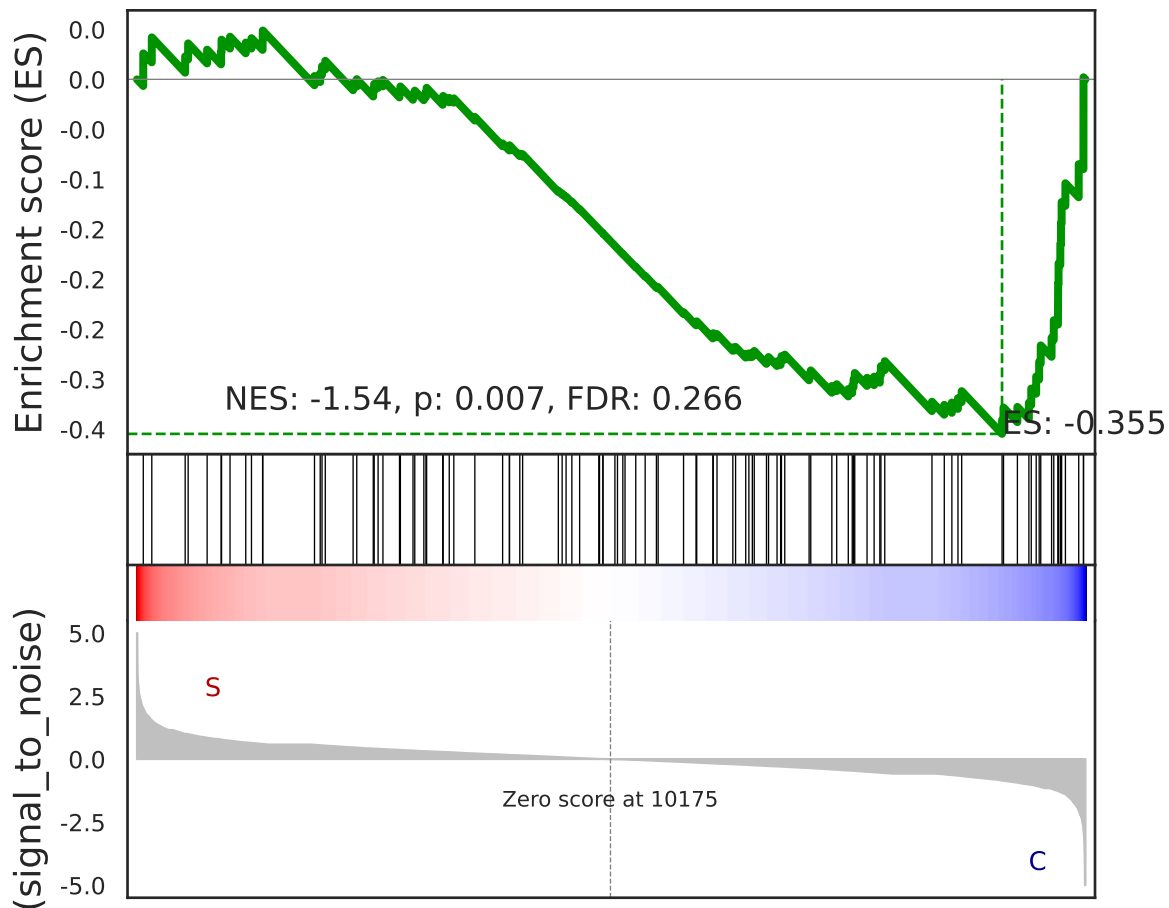

Supplement: Supplementary file 411 [file 311_ATP-dependent chromatin remodeling(hsa03082).gsea.pdf › Source data/1.RNA-Seq source data/2.HUVECs/result/1.6.GSEA/S-vs-C/kegg/311_ATP-dependent chromatin remodeling(hsa03082).gsea.pdf]

# ATP-dependent chromatin remodeling(hsa03082)

## Heatmap of the Analyzed GeneSet

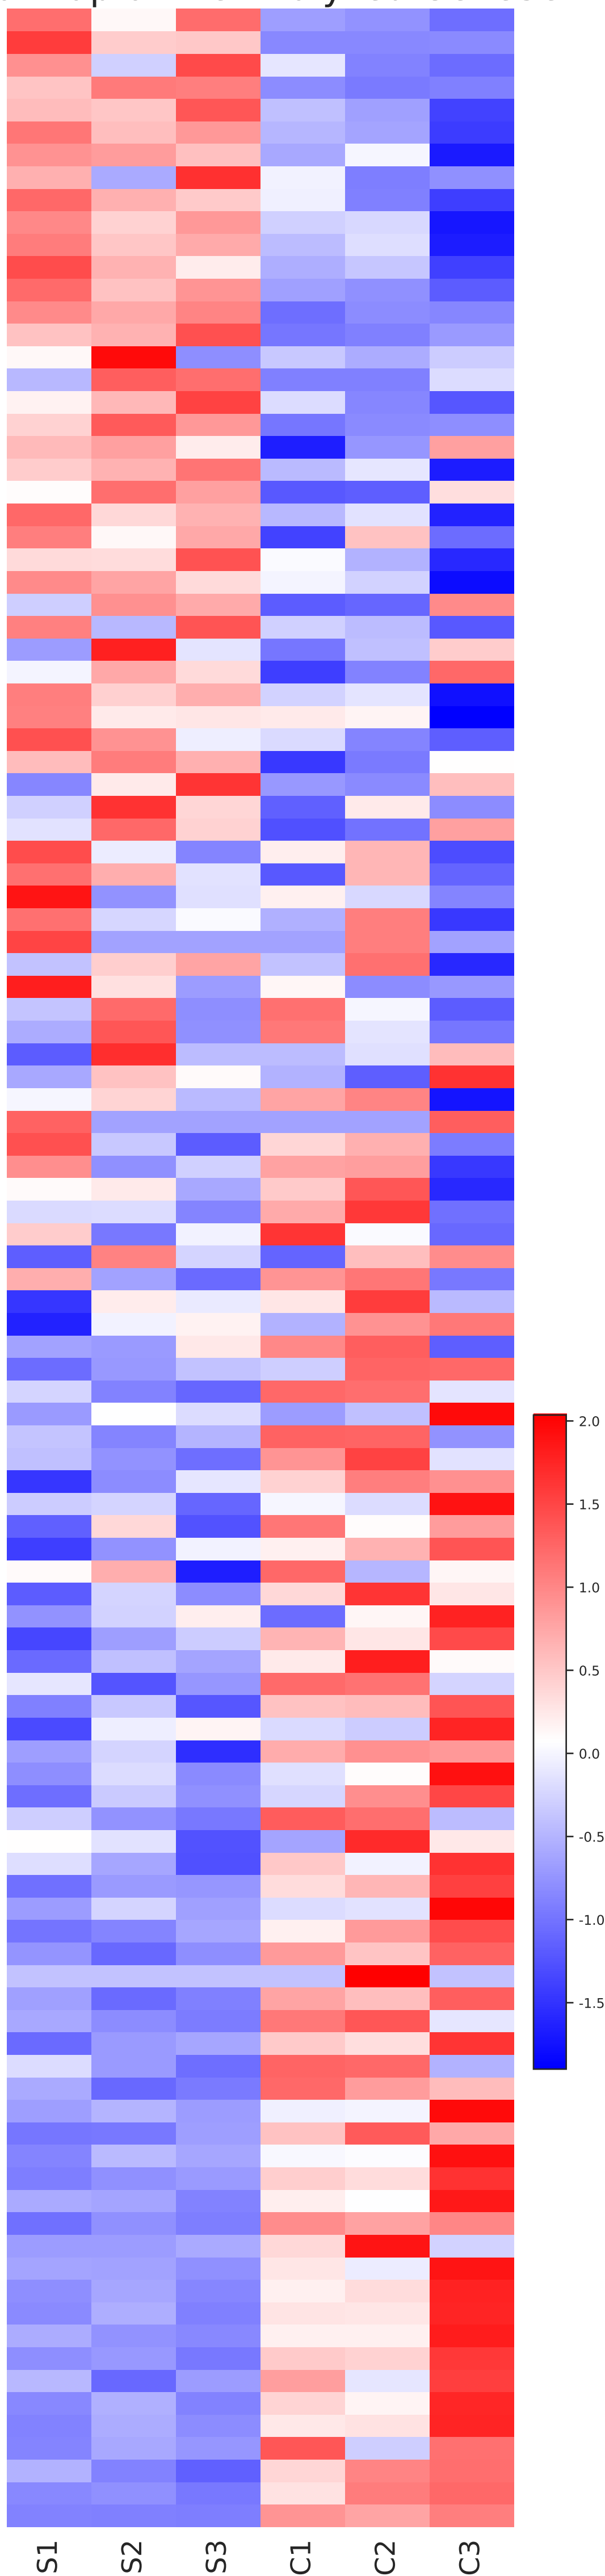

Supplement: Supplementary file 412 [file 311_ATP-dependent chromatin remodeling(hsa03082).heatmap.pdf › Source data/1.RNA-Seq source data/2.HUVECs/result/1.6.GSEA/S-vs-C/kegg/311_ATP-dependent chromatin remodeling(hsa03082).heatmap.pdf]

# Cholesterol metabolism(hsa04979)

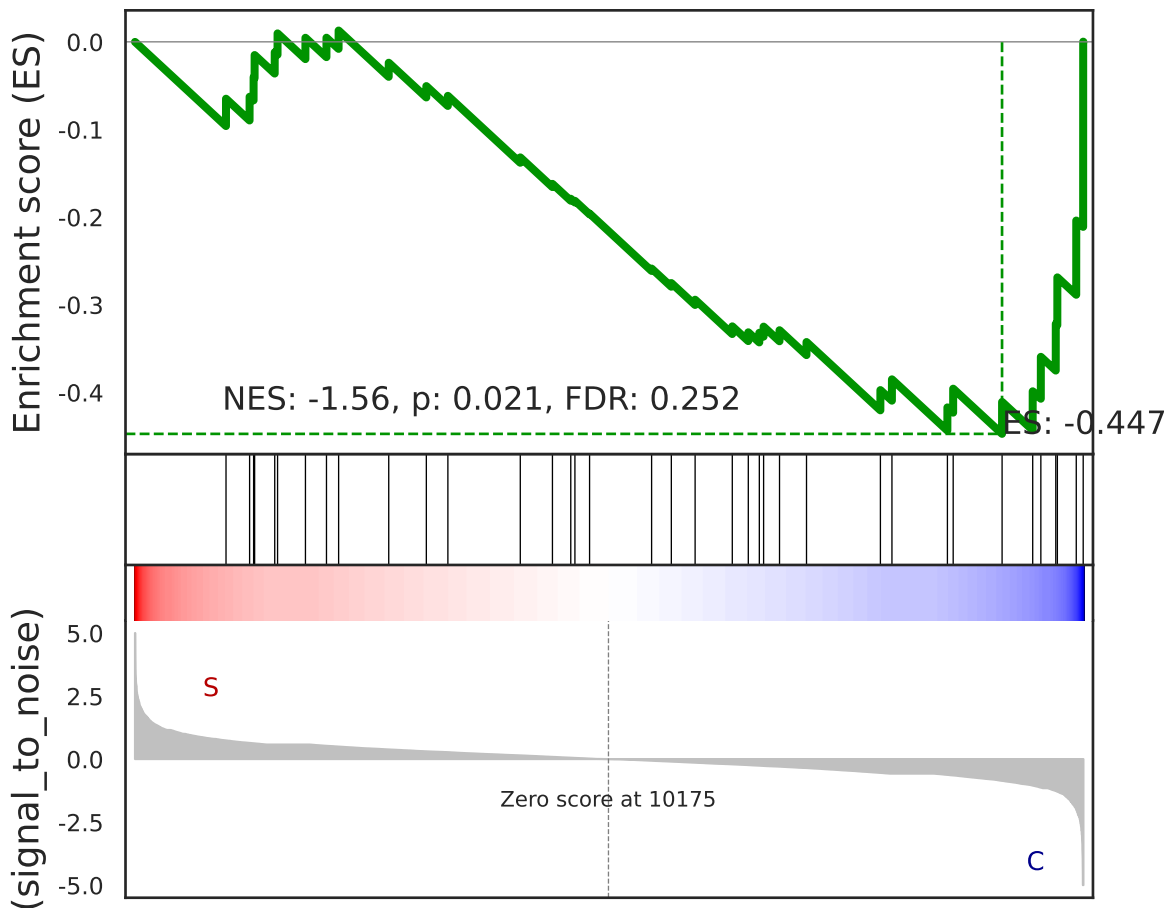

Supplement: Supplementary file 413 [file 312_Cholesterol metabolism(hsa04979).gsea.pdf › Source data/1.RNA-Seq source data/2.HUVECs/result/1.6.GSEA/S-vs-C/kegg/312_Cholesterol metabolism(hsa04979).gsea.pdf]

Cholesterol metabolism(hsa04979)  
Heatmap of the Analyzed GeneSet

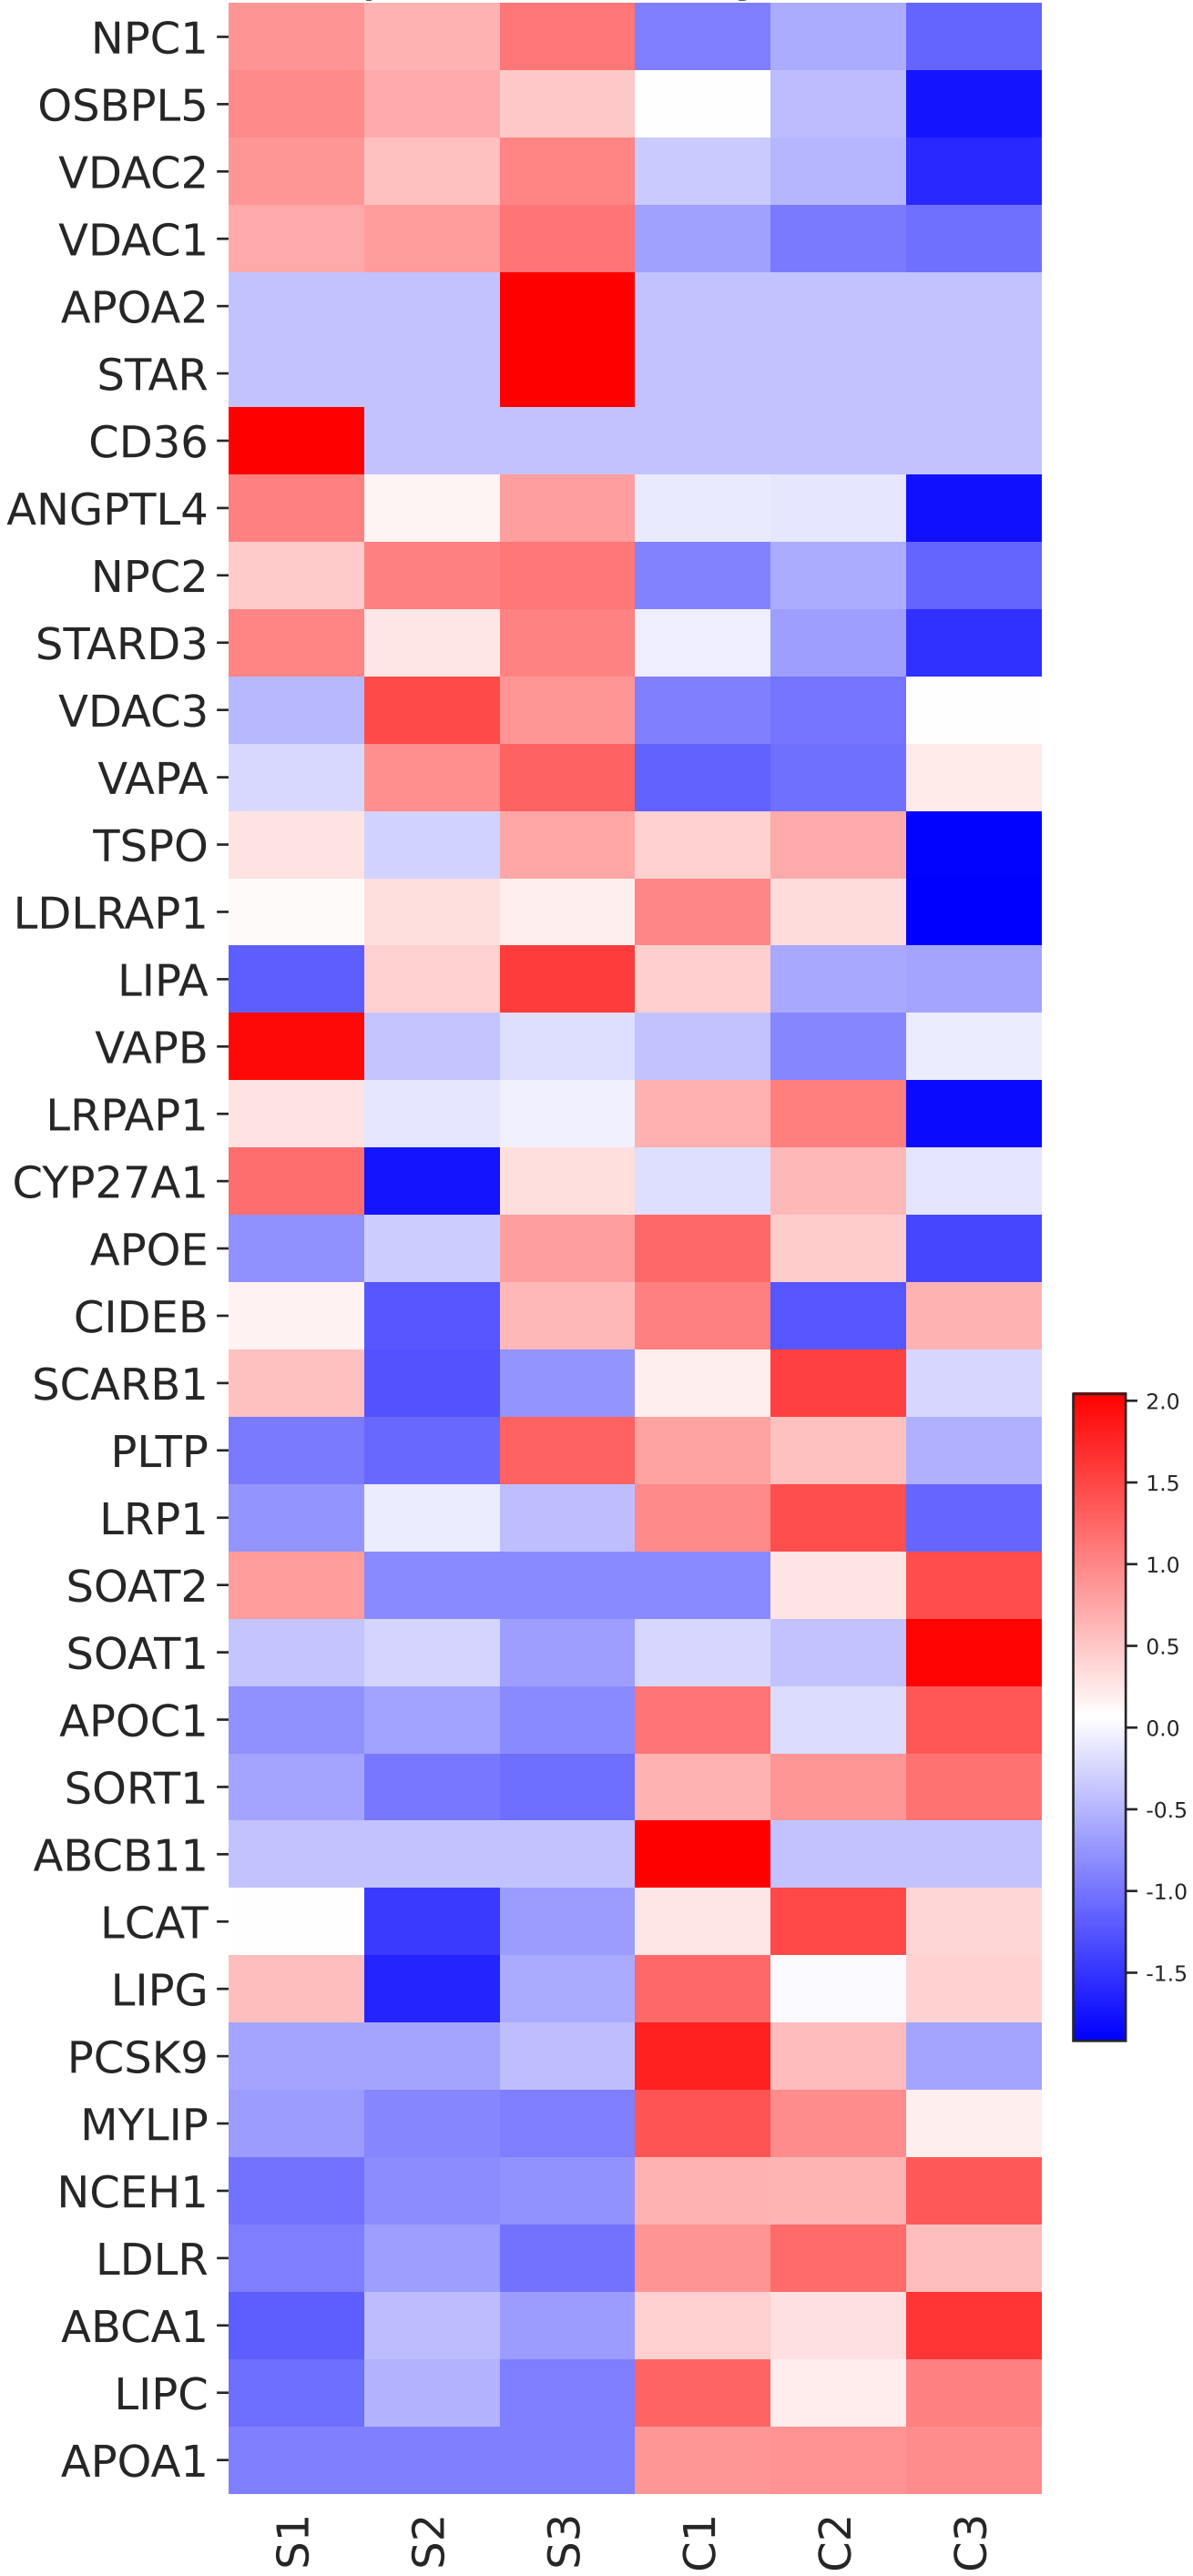

Supplement: Supplementary file 414 [file 312_Cholesterol metabolism(hsa04979).heatmap.pdf › Source data/1.RNA-Seq source data/2.HUVECs/result/1.6.GSEA/S-vs-C/kegg/312_Cholesterol metabolism(hsa04979).heatmap.pdf]

# Vitamin digestion and absorption(hsa04977)

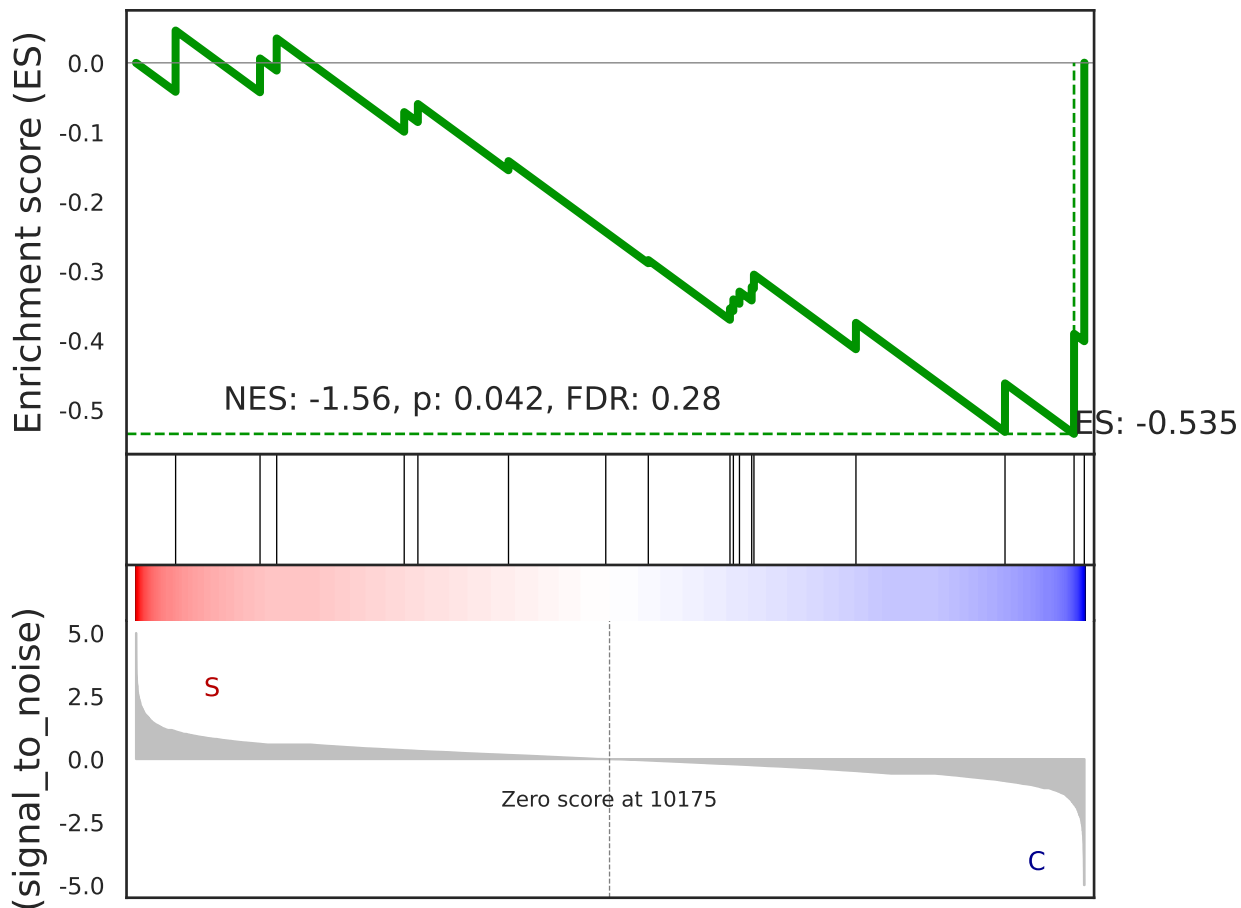

Supplement: Supplementary file 415 [file 313_Vitamin digestion and absorption(hsa04977).gsea.pdf › Source data/1.RNA-Seq source data/2.HUVECs/result/1.6.GSEA/S-vs-C/kegg/313_Vitamin digestion and absorption(hsa04977).gsea.pdf]

# Vitamin digestion and absorption(hsa04977)

## Heatmap of the Analyzed GeneSet

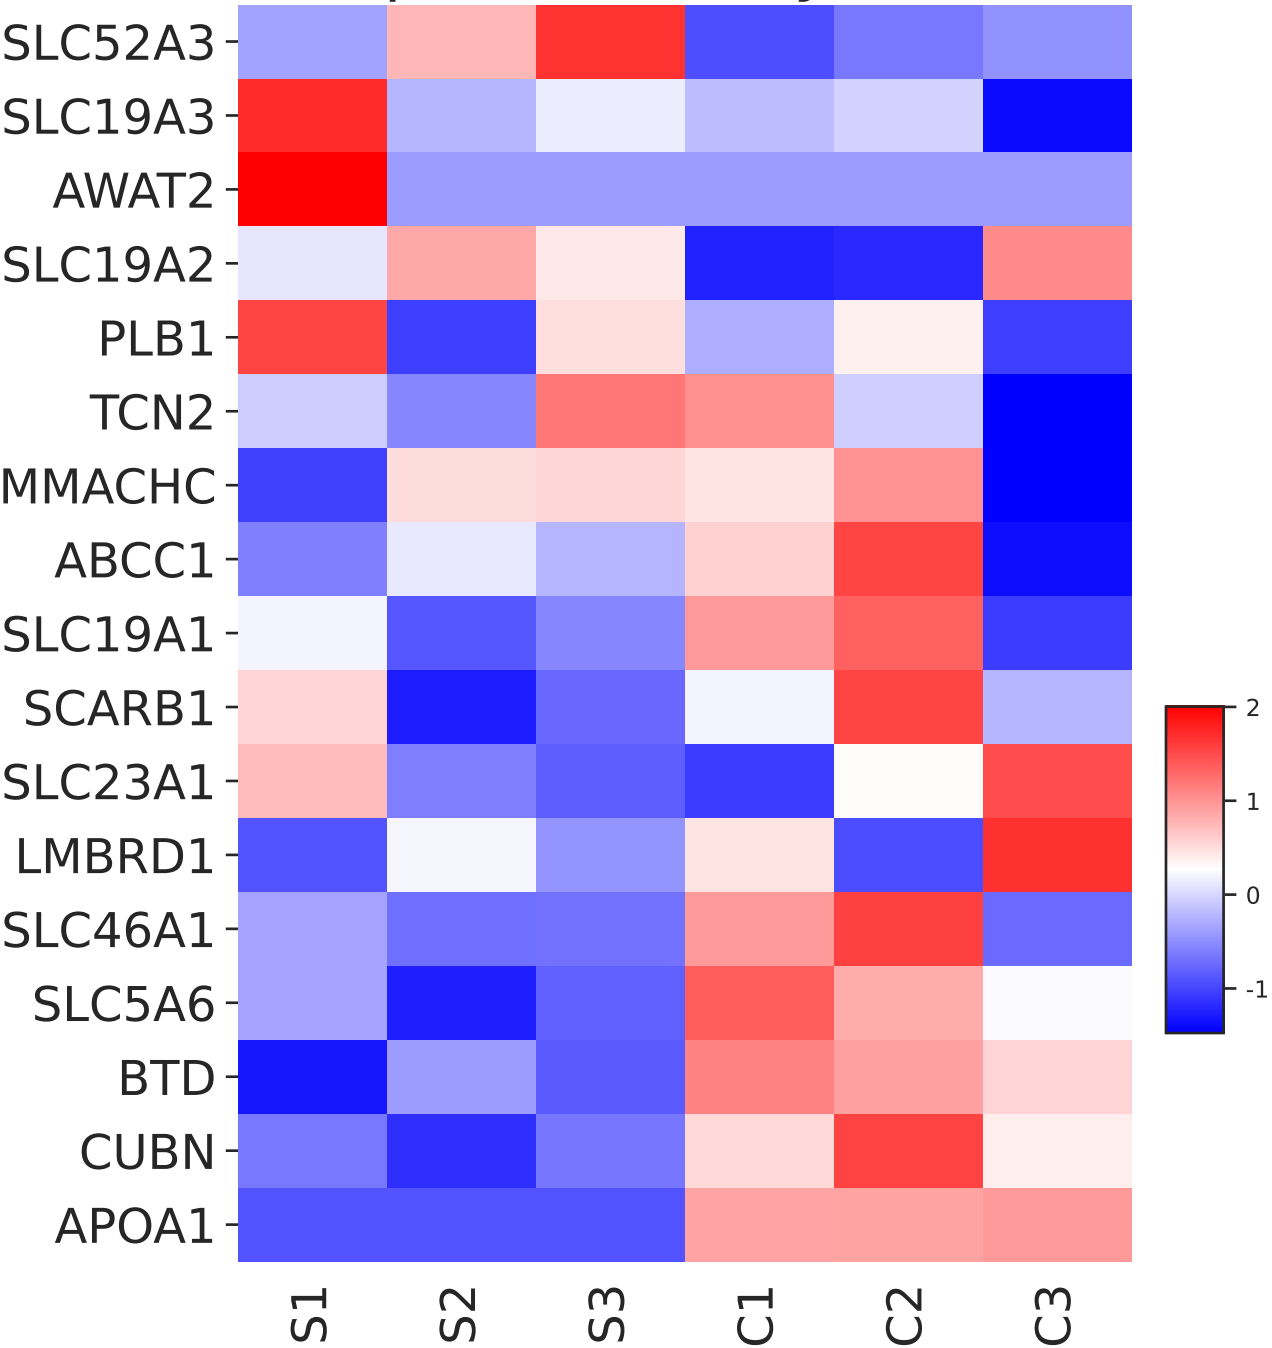

Supplement: Supplementary file 416 [file 313_Vitamin digestion and absorption(hsa04977).heatmap.pdf › Source data/1.RNA-Seq source data/2.HUVECs/result/1.6.GSEA/S-vs-C/kegg/313_Vitamin digestion and absorption(hsa04977).heatmap.pdf]

# Fat digestion and absorption(hsa04975)

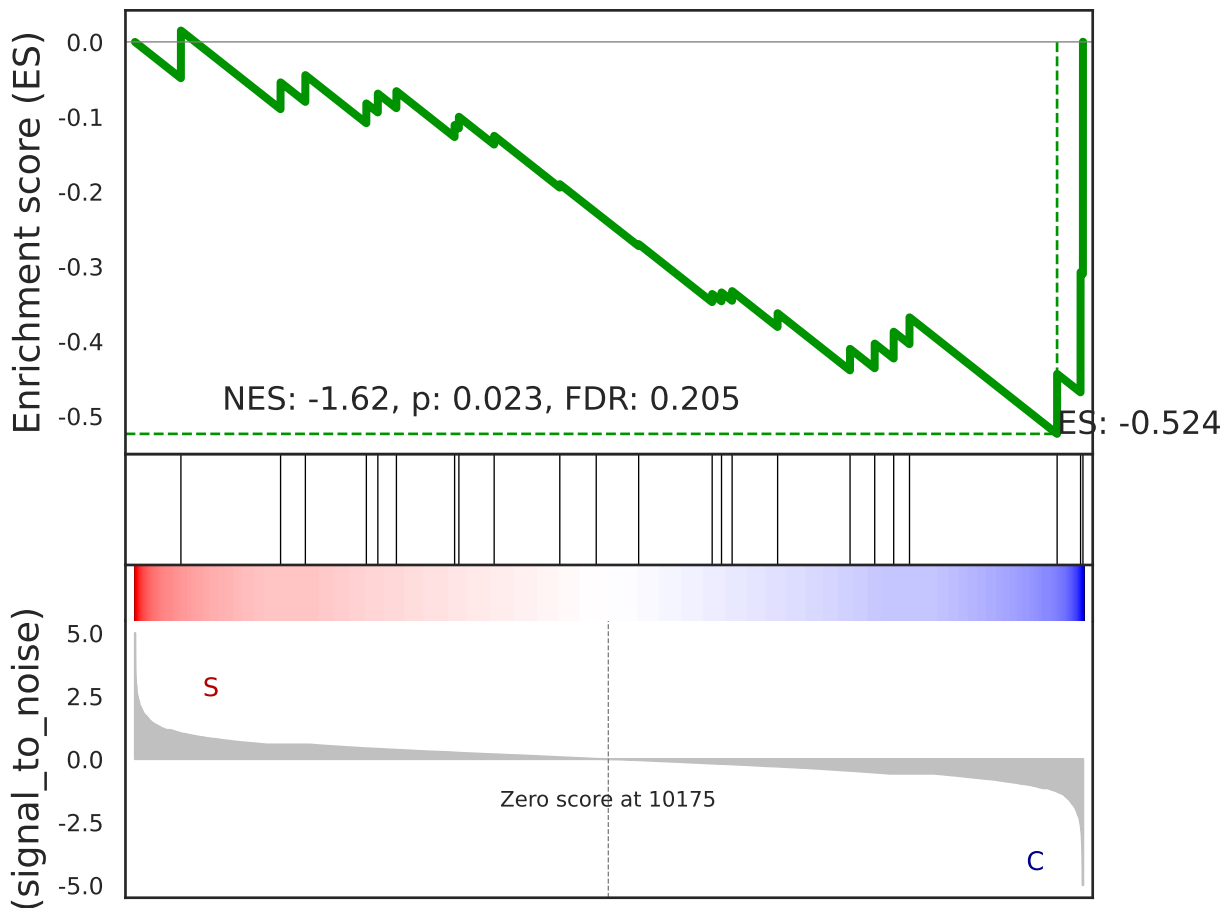

Supplement: Supplementary file 417 [file 314_Fat digestion and absorption(hsa04975).gsea.pdf › Source data/1.RNA-Seq source data/2.HUVECs/result/1.6.GSEA/S-vs-C/kegg/314_Fat digestion and absorption(hsa04975).gsea.pdf]

# Fat digestion and absorption(hsa04975)

## Heatmap of the Analyzed GeneSet

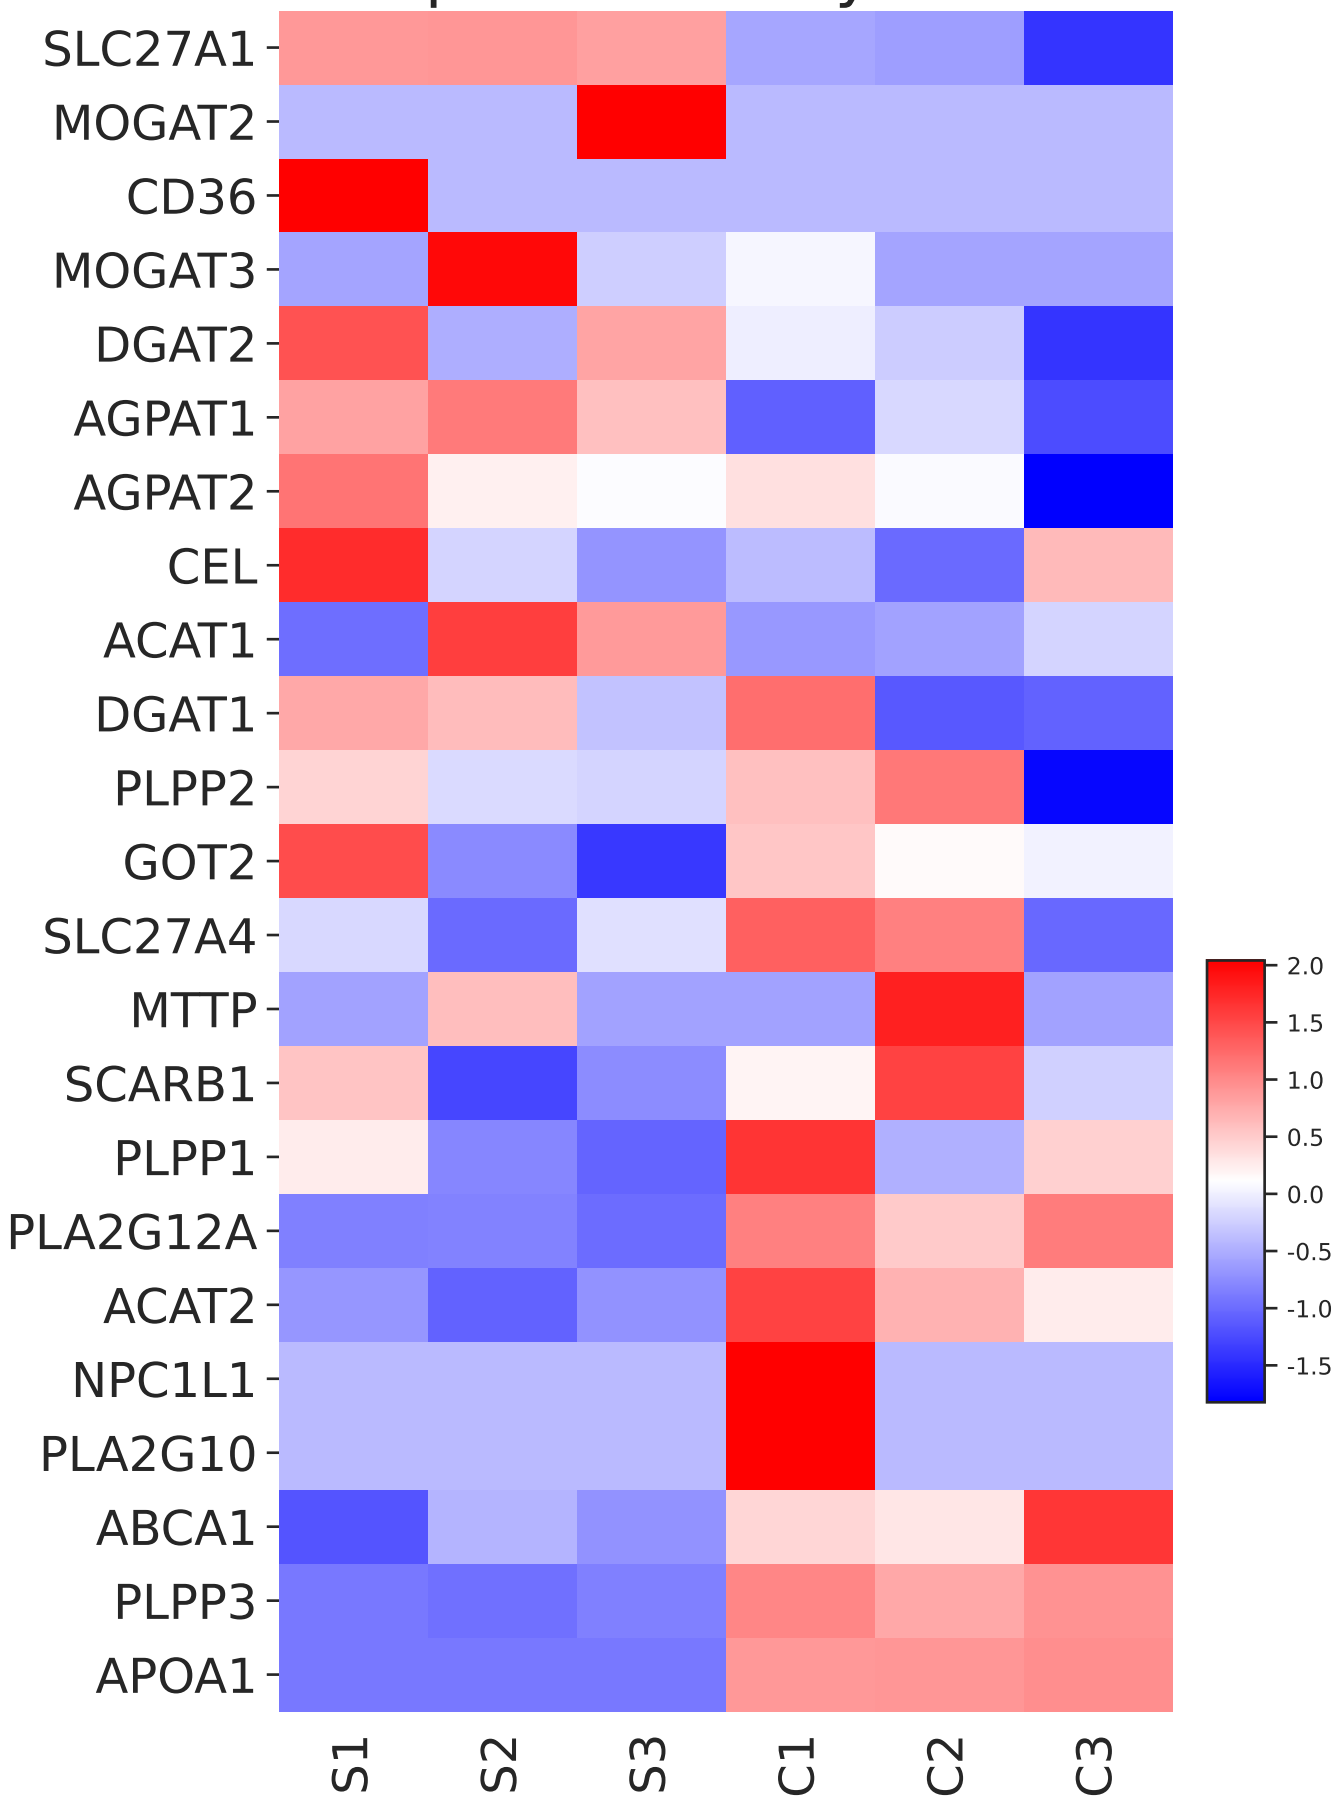

Supplement: Supplementary file 418 [file 314_Fat digestion and absorption(hsa04975).heatmap.pdf › Source data/1.RNA-Seq source data/2.HUVECs/result/1.6.GSEA/S-vs-C/kegg/314_Fat digestion and absorption(hsa04975).heatmap.pdf]

# Bile secretion(hsa04976)

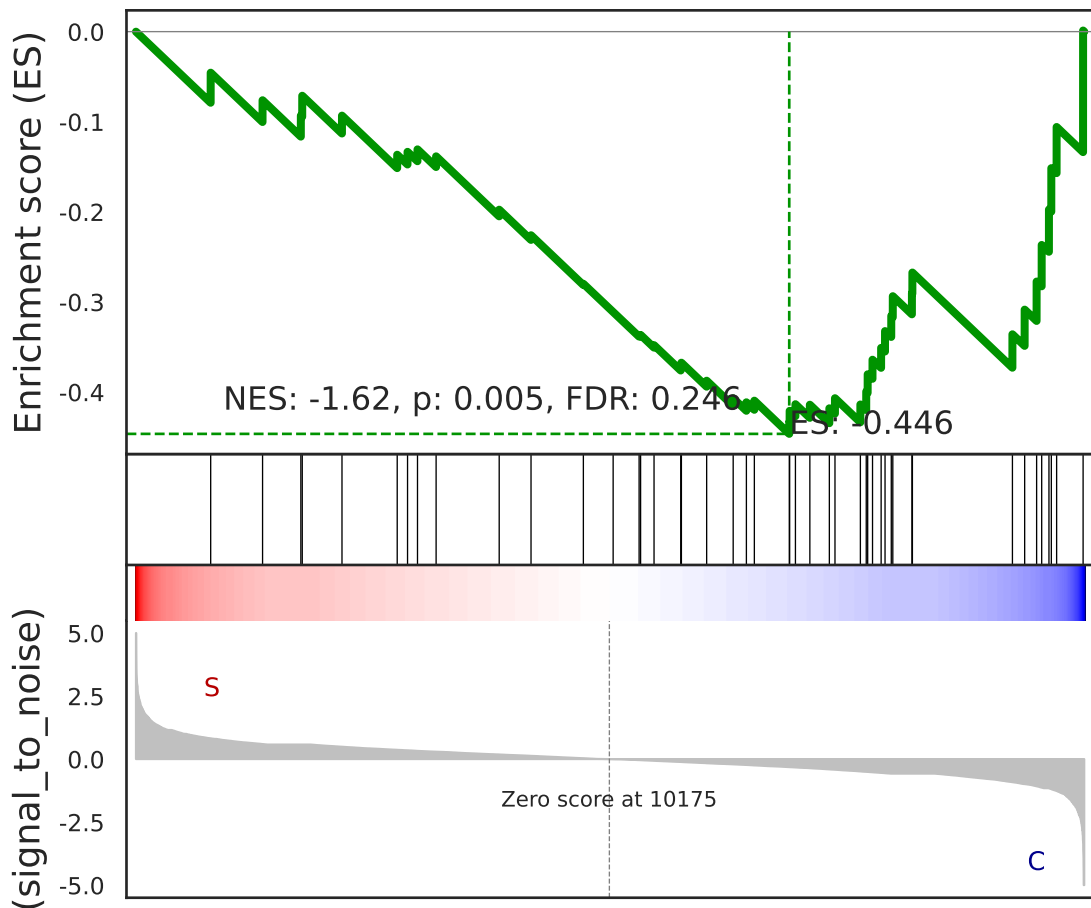

Supplement: Supplementary file 419 [file 315_Bile secretion(hsa04976).gsea.pdf › Source data/1.RNA-Seq source data/2.HUVECs/result/1.6.GSEA/S-vs-C/kegg/315_Bile secretion(hsa04976).gsea.pdf]

Bile secretion(hsa04976)  
Heatmap of the Analyzed GeneSet

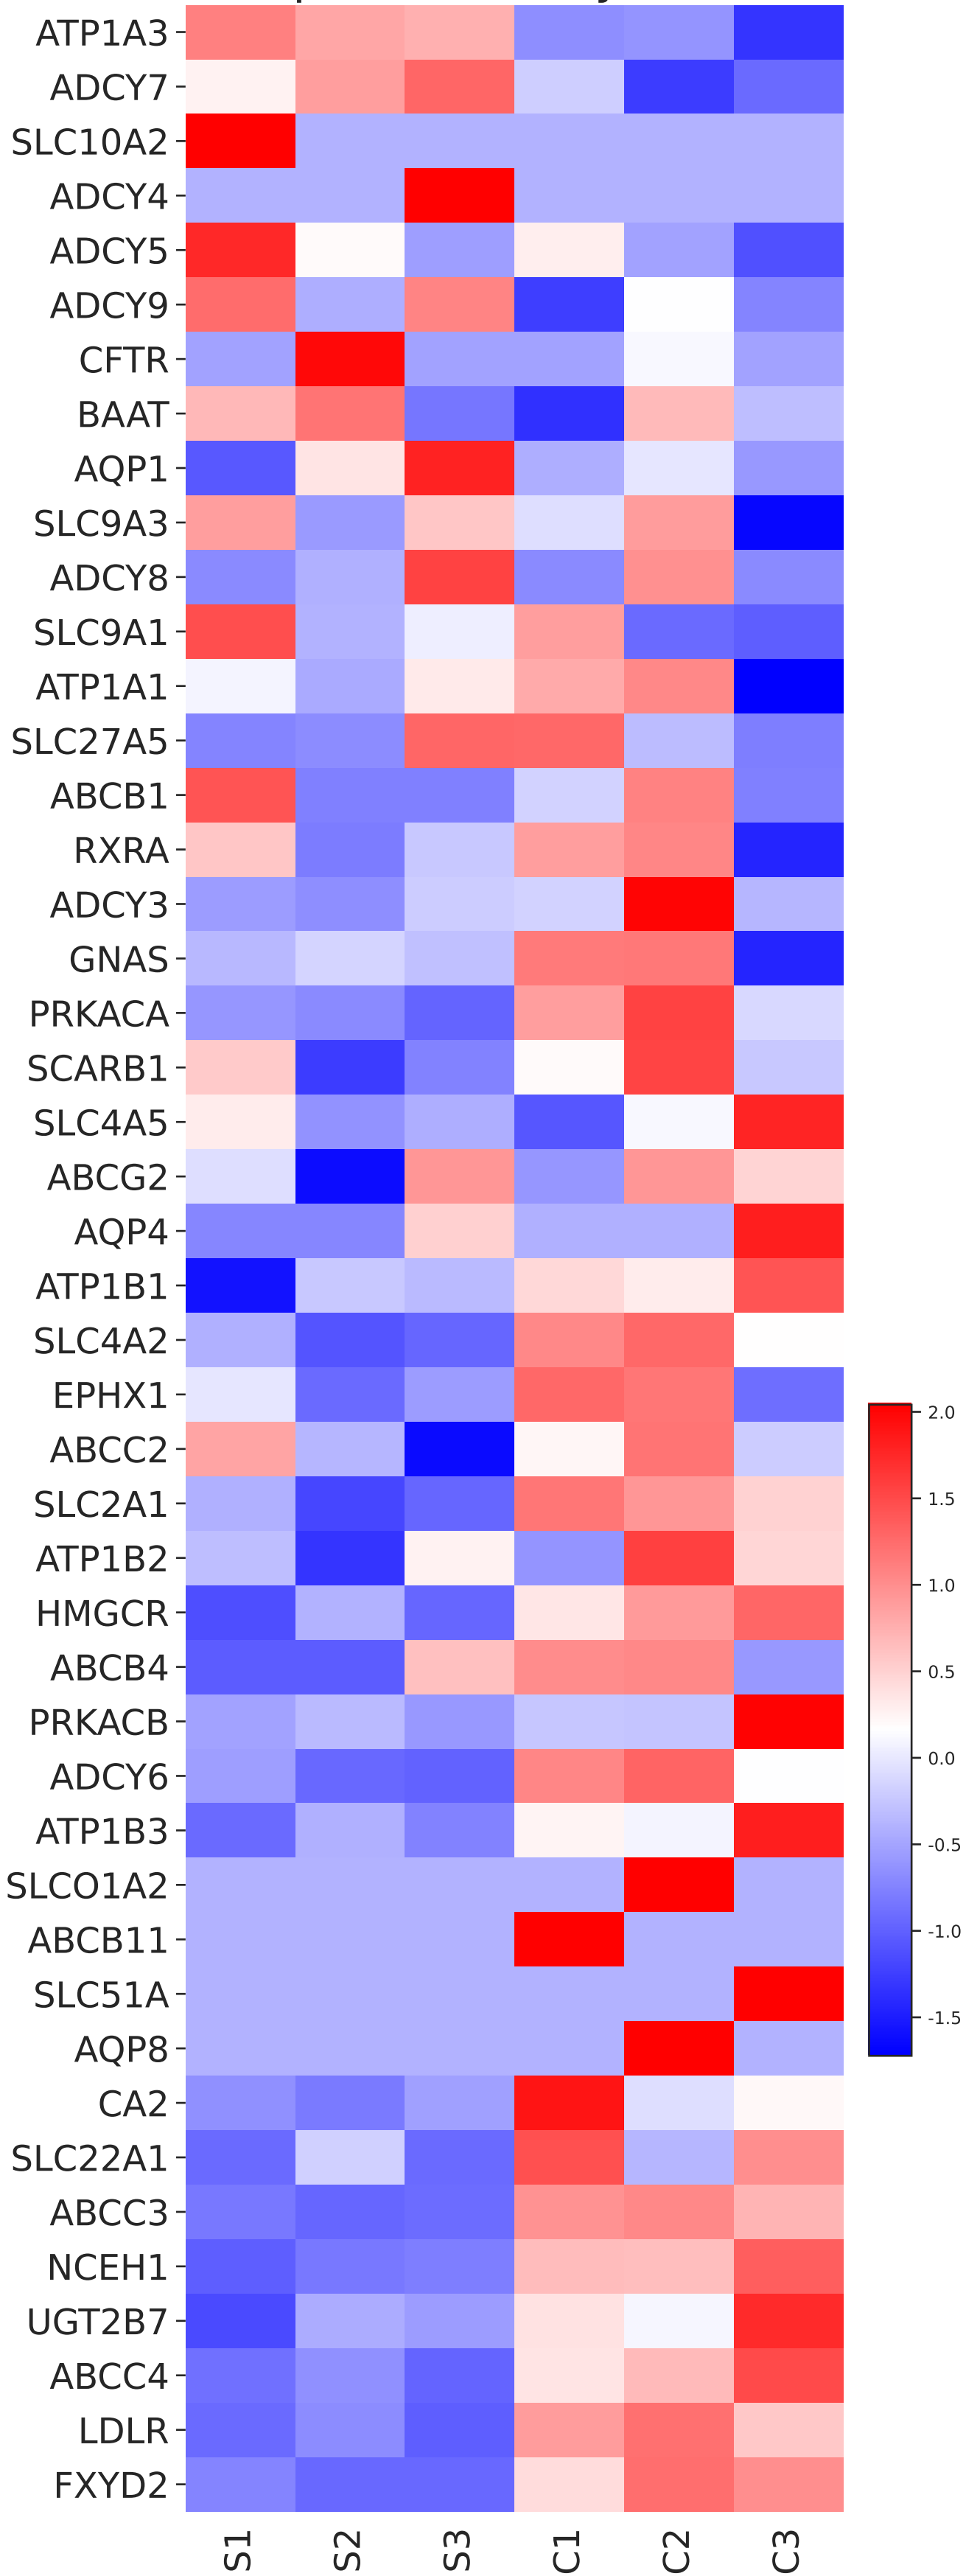

Supplement: Supplementary file 420 [file 315_Bile secretion(hsa04976).heatmap.pdf › Source data/1.RNA-Seq source data/2.HUVECs/result/1.6.GSEA/S-vs-C/kegg/315_Bile secretion(hsa04976).heatmap.pdf]

# Neutrophil extracellular trap formation(hsa04613)

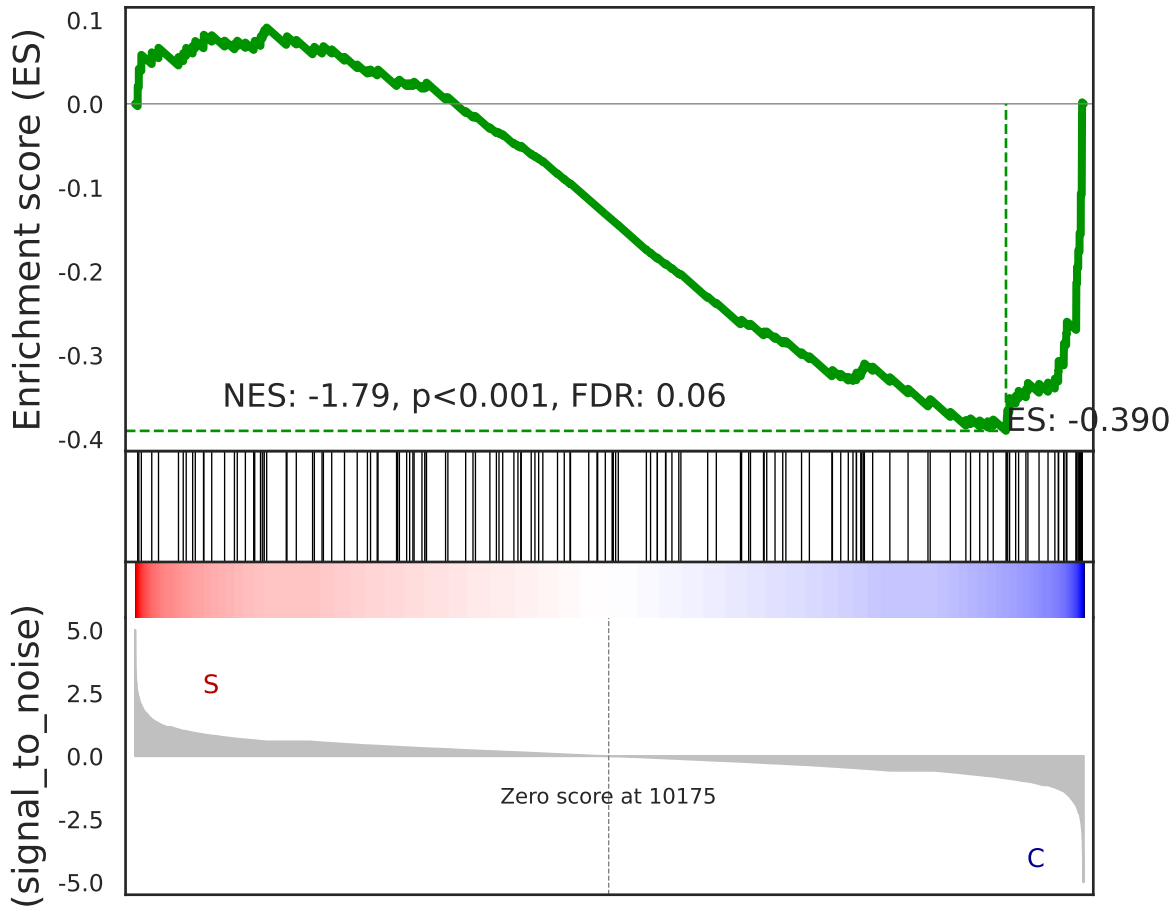

Supplement: Supplementary file 421 [file 316_Neutrophil extracellular trap formation(hsa04613).gsea.pdf › Source data/1.RNA-Seq source data/2.HUVECs/result/1.6.GSEA/S-vs-C/kegg/316_Neutrophil extracellular trap formation(hsa04613).gsea.pdf]

Neutrophil extracellular trap formation(hsa04613)  
Heatmap of the Analyzed GeneSet

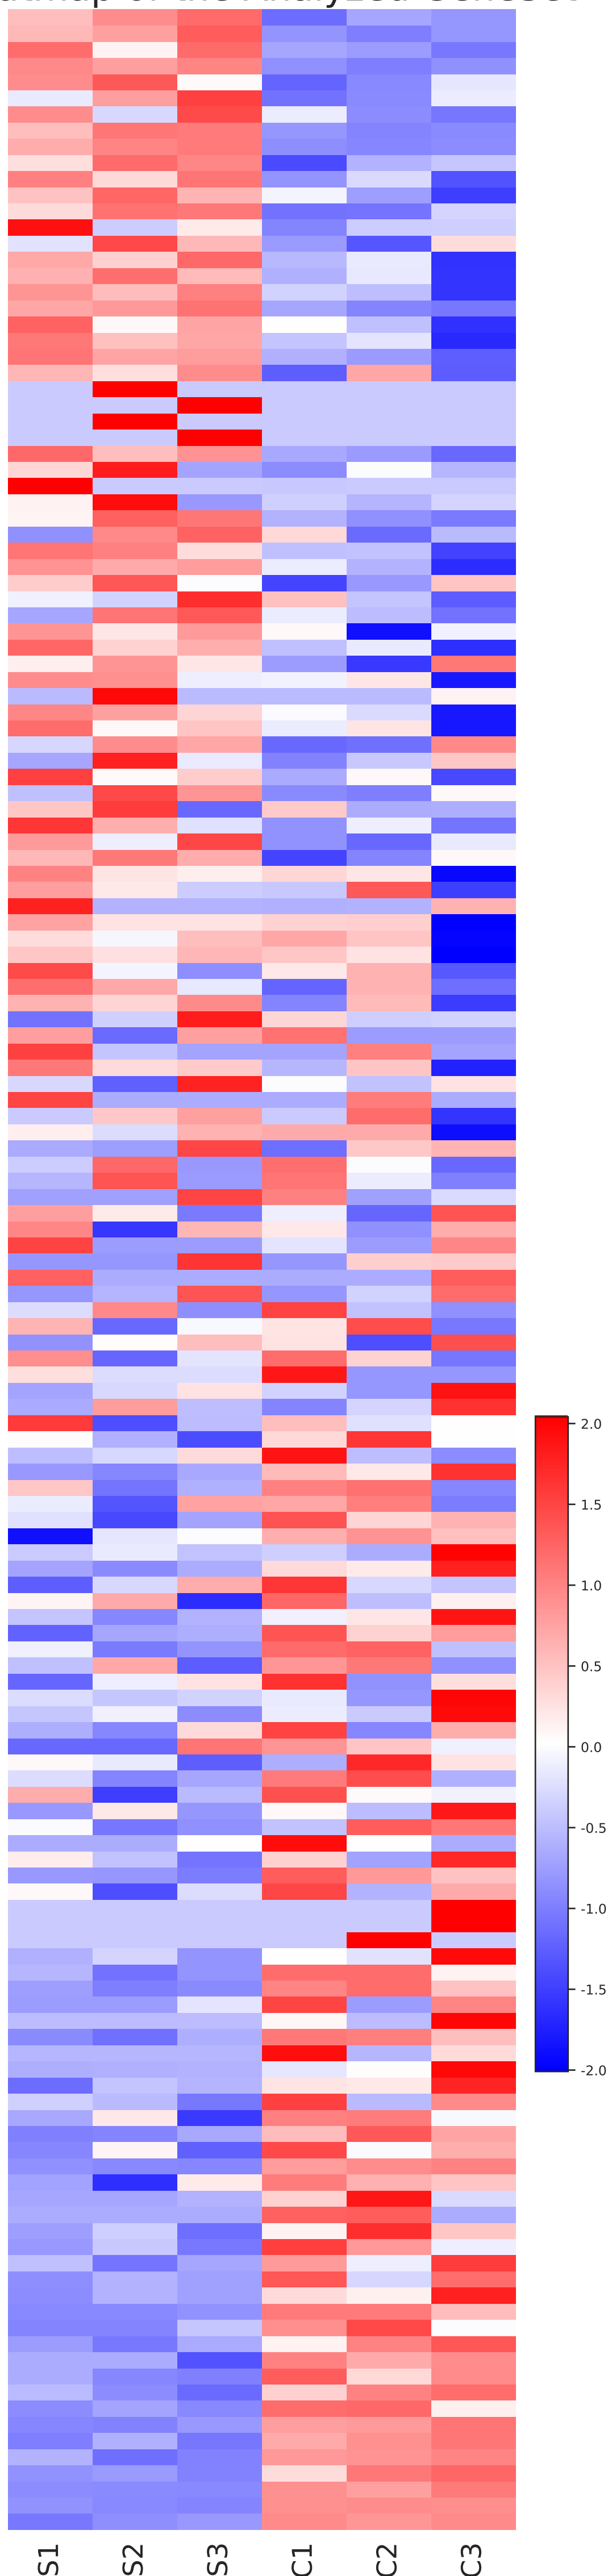

Supplement: Supplementary file 422 [file 316_Neutrophil extracellular trap formation(hsa04613).heatmap.pdf › Source data/1.RNA-Seq source data/2.HUVECs/result/1.6.GSEA/S-vs-C/kegg/316_Neutrophil extracellular trap formation(hsa04613).heatmap.pdf]

# Alcoholism(hsa05034)

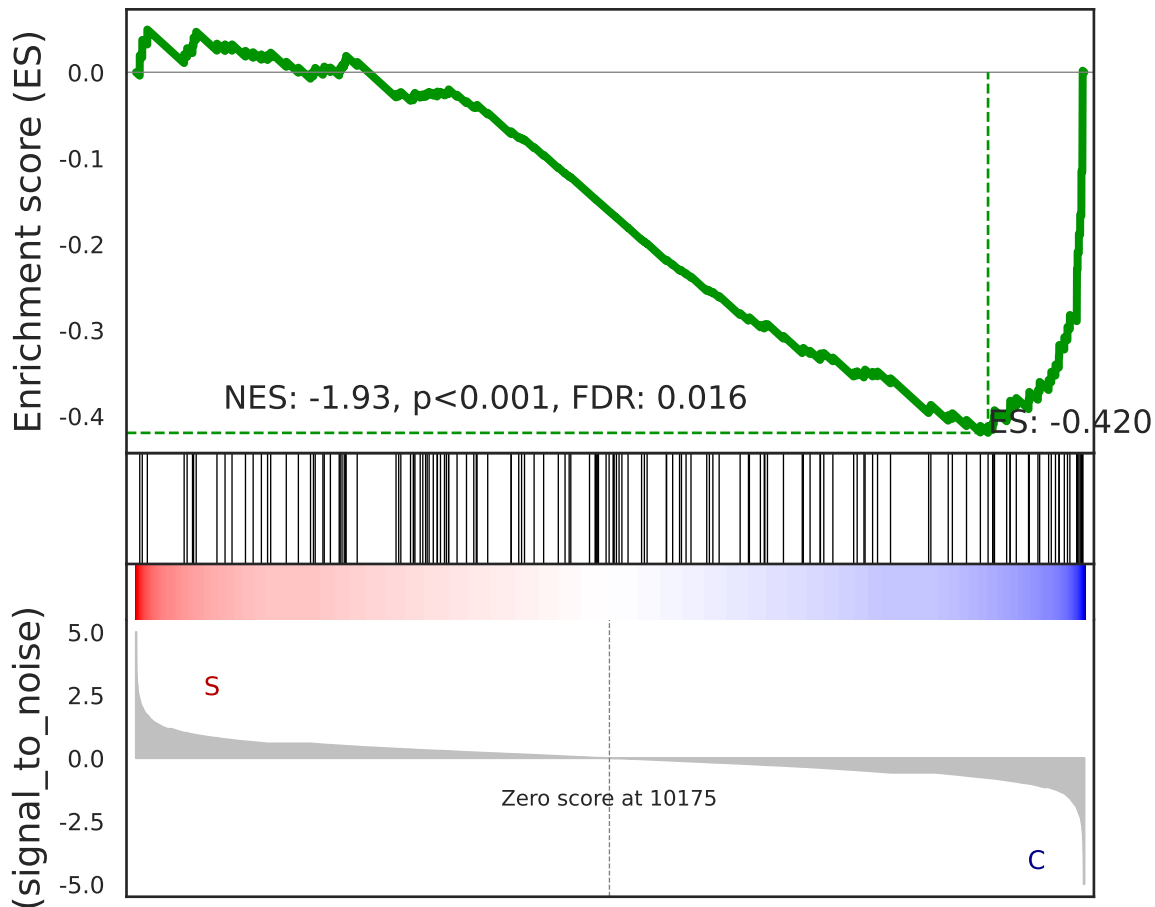

Supplement: Supplementary file 423 [file 317_Alcoholism(hsa05034).gsea.pdf › Source data/1.RNA-Seq source data/2.HUVECs/result/1.6.GSEA/S-vs-C/kegg/317_Alcoholism(hsa05034).gsea.pdf]

Alcoholism(hsa05034)  
Heatmap of the Analyzed GeneSet

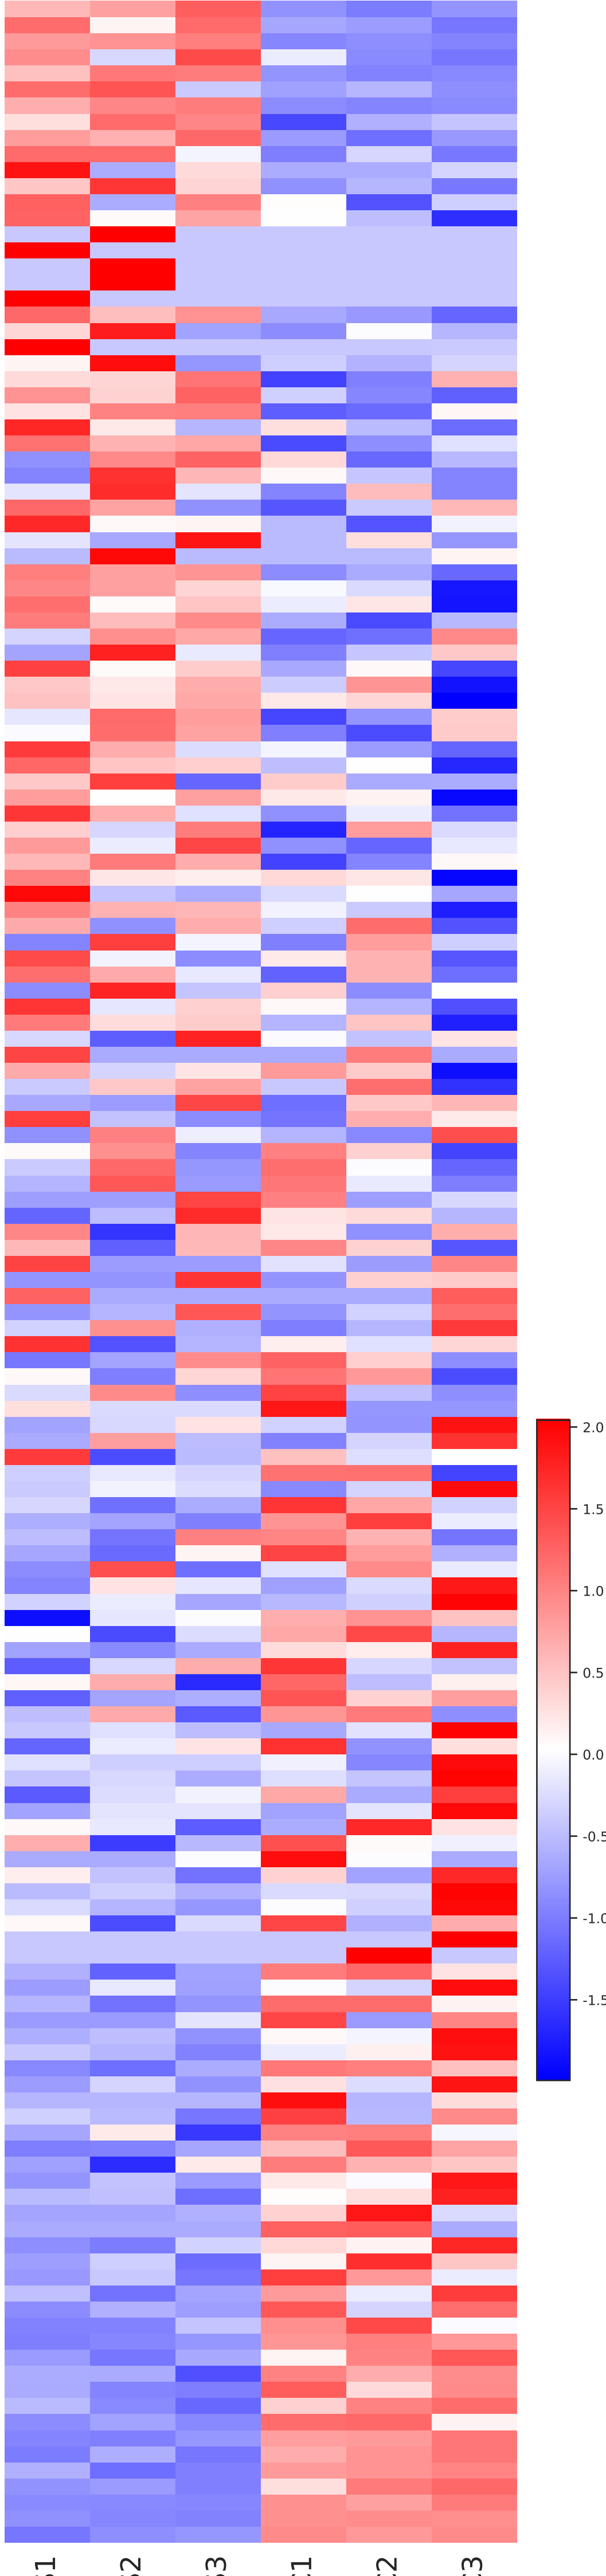

Supplement: Supplementary file 424 [file 317_Alcoholism(hsa05034).heatmap.pdf › Source data/1.RNA-Seq source data/2.HUVECs/result/1.6.GSEA/S-vs-C/kegg/317_Alcoholism(hsa05034).heatmap.pdf]

# Systemic lupus erythematosus(hsa05322)

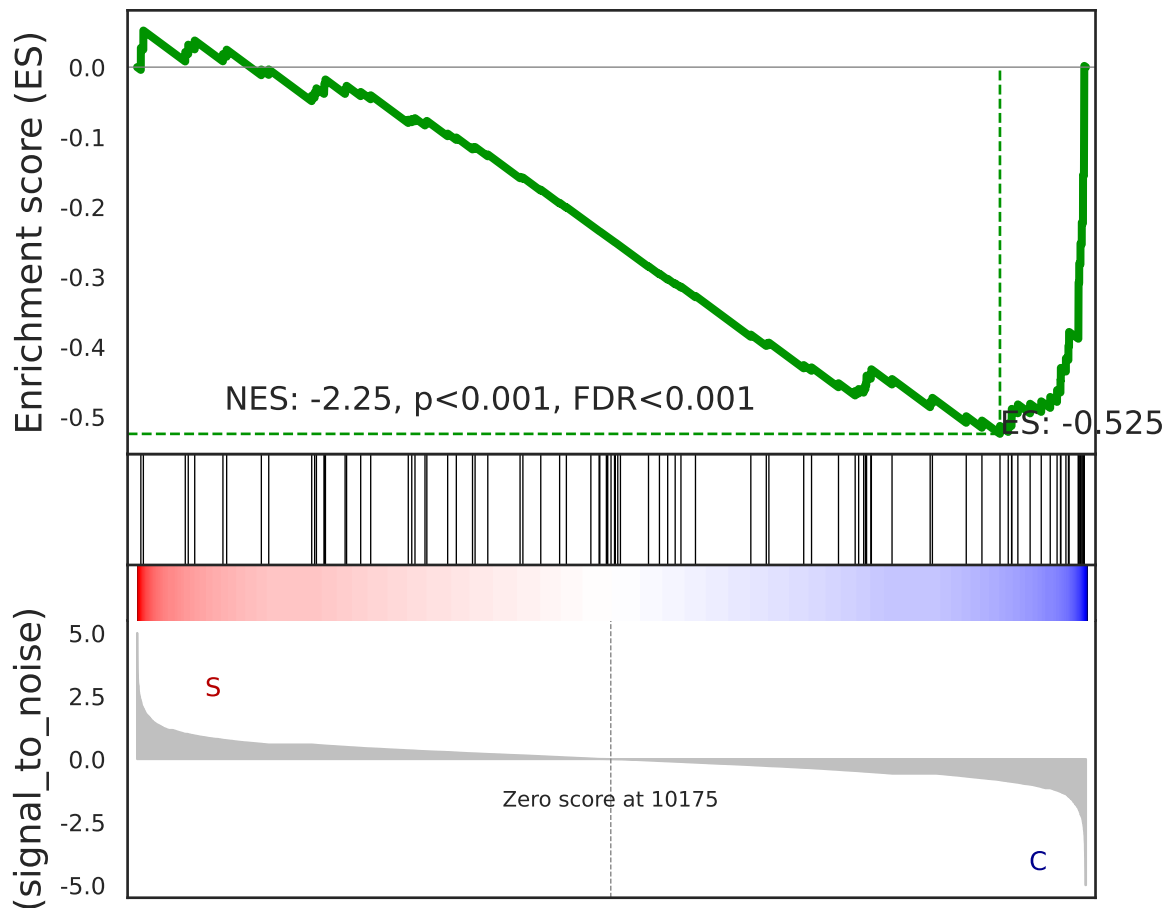

Supplement: Supplementary file 425 [file 318_Systemic lupus erythematosus(hsa05322).gsea.pdf › Source data/1.RNA-Seq source data/2.HUVECs/result/1.6.GSEA/S-vs-C/kegg/318_Systemic lupus erythematosus(hsa05322).gsea.pdf]

Systemic lupus erythematosus(hsa05322)  
Heatmap of the Analyzed GeneSet

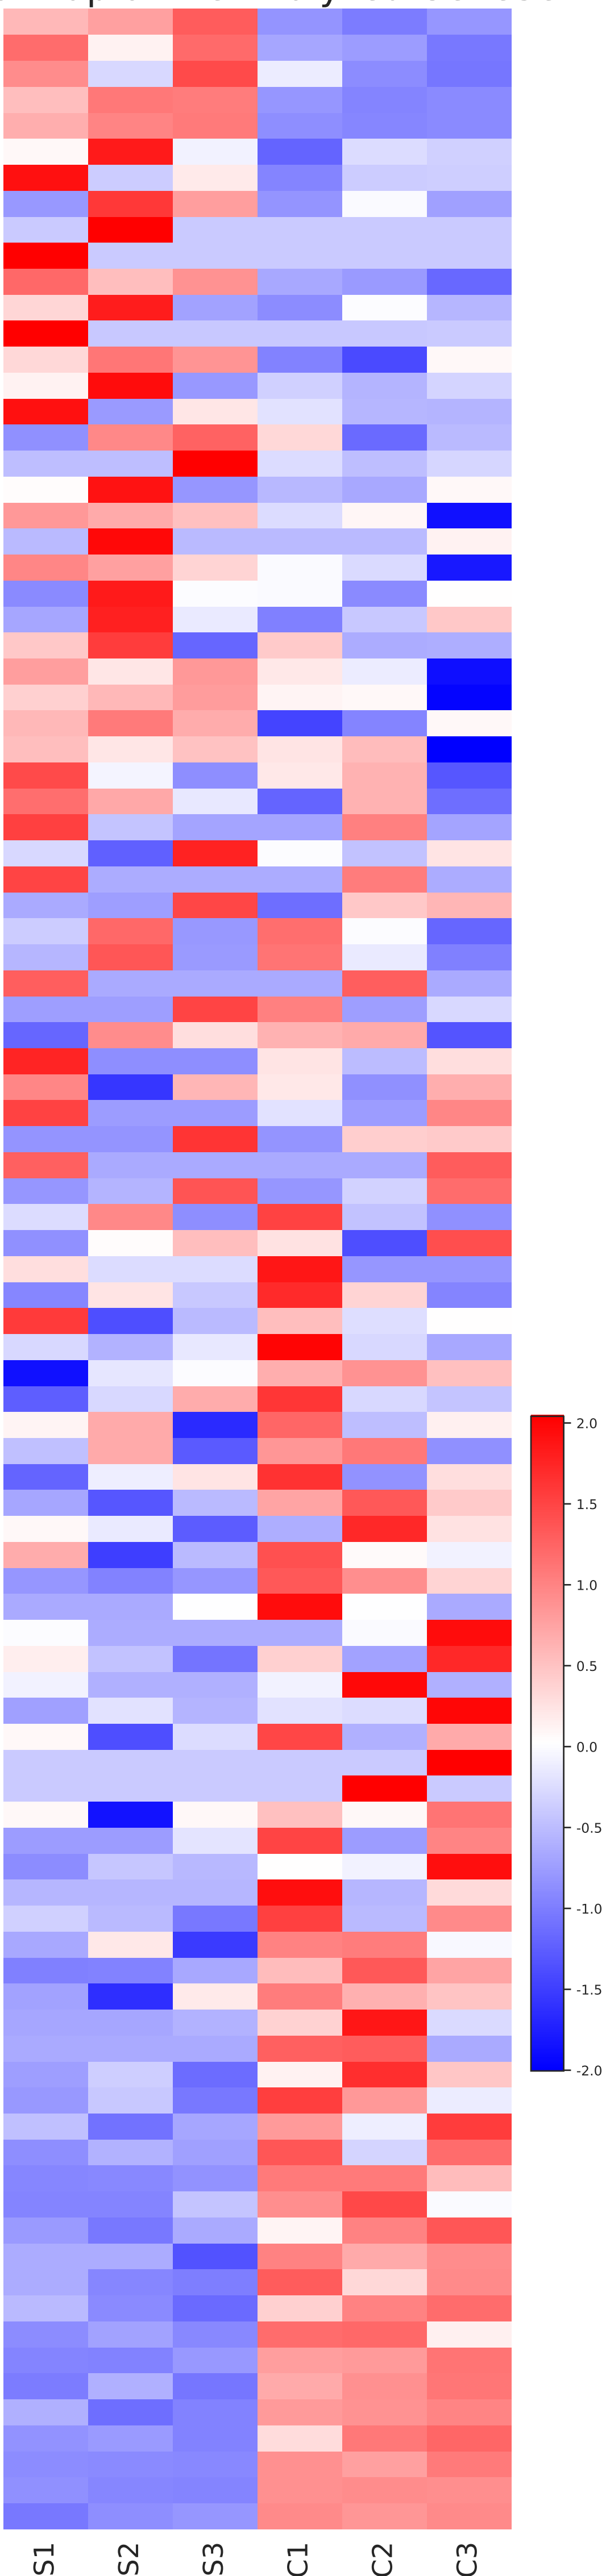

Supplement: Supplementary file 426 [file 318_Systemic lupus erythematosus(hsa05322).heatmap.pdf › Source data/1.RNA-Seq source data/2.HUVECs/result/1.6.GSEA/S-vs-C/kegg/318_Systemic lupus erythematosus(hsa05322).heatmap.pdf]

# Glycine, serine and threonine metabolism(hsa00260)

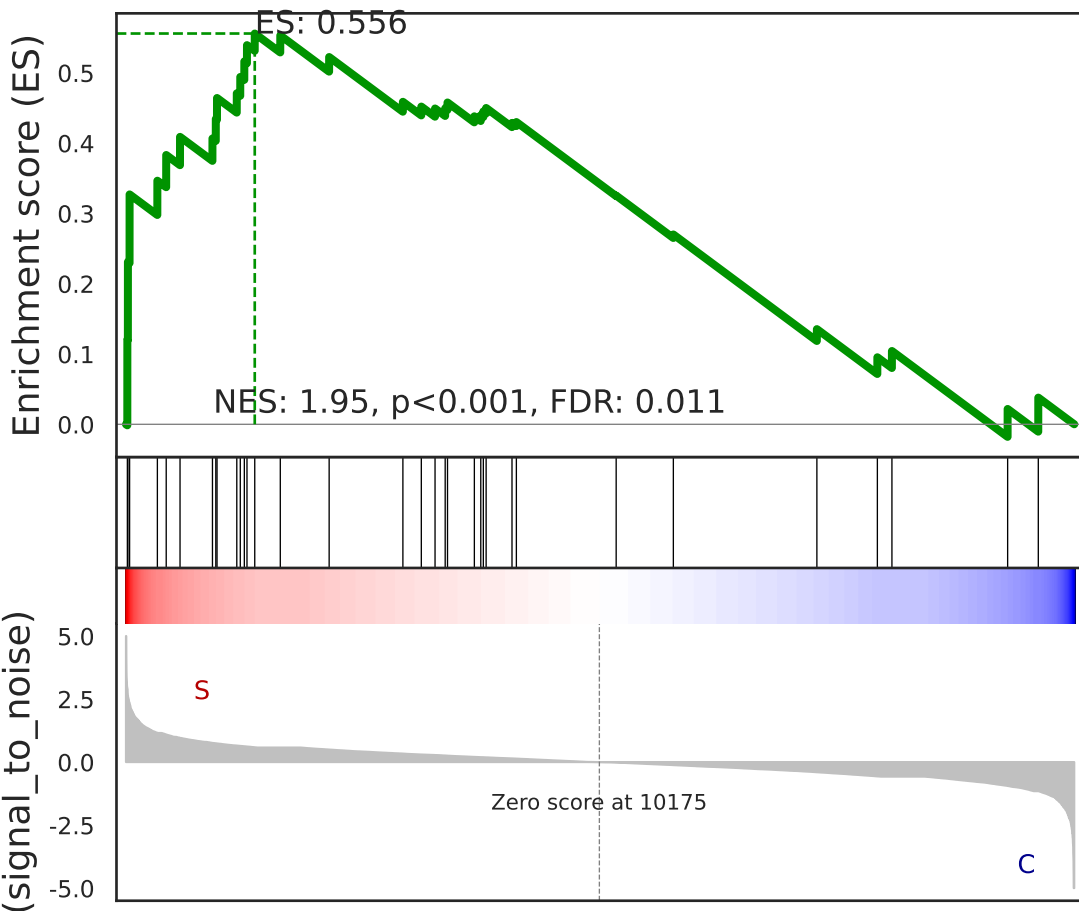

Supplement: Supplementary file 427 [file 3_Glycine, serine and threonine metabolism(hsa00260).gsea.pdf › Source data/1.RNA-Seq source data/2.HUVECs/result/1.6.GSEA/S-vs-C/kegg/3_Glycine, serine and threonine metabolism(hsa00260).gsea.pdf]

Glycine, serine and threonine metabolism(hsa00260)  
Heatmap of the Analyzed GeneSet

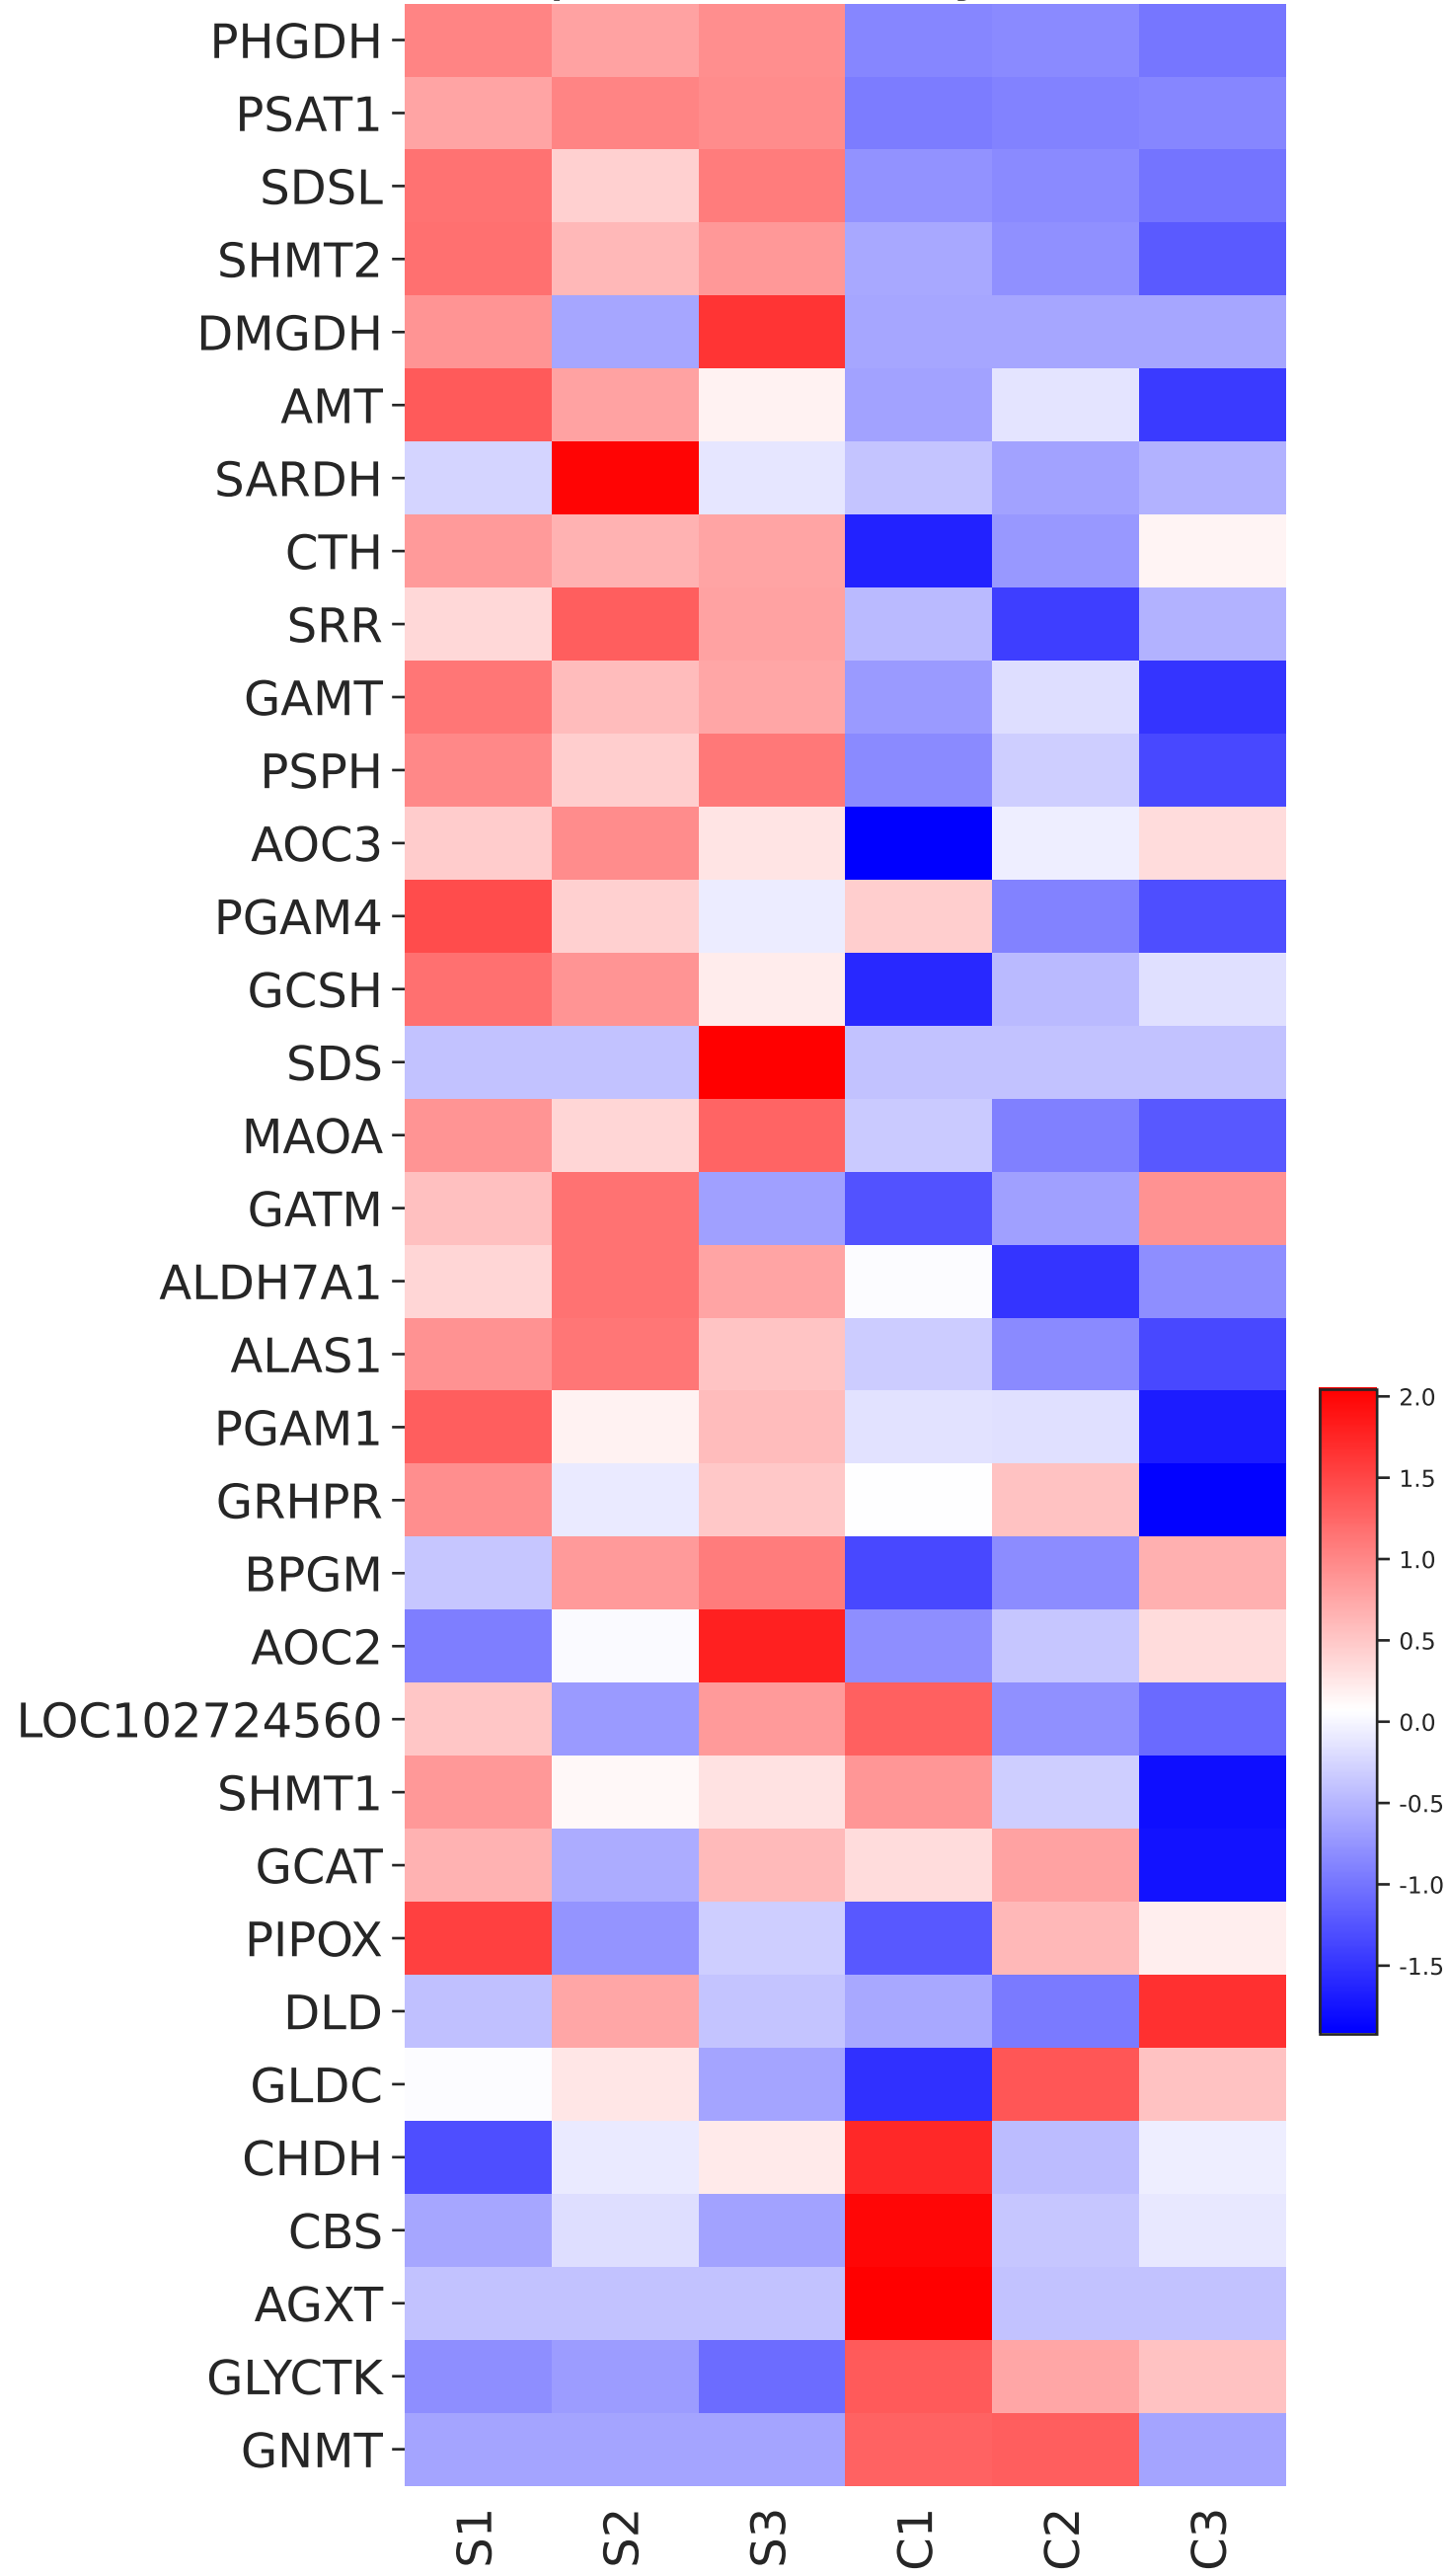

Supplement: Supplementary file 428 [file 3_Glycine, serine and threonine metabolism(hsa00260).heatmap.pdf › Source data/1.RNA-Seq source data/2.HUVECs/result/1.6.GSEA/S-vs-C/kegg/3_Glycine, serine and threonine metabolism(hsa00260).heatmap.pdf]

# One carbon pool by folate(hsa00670)

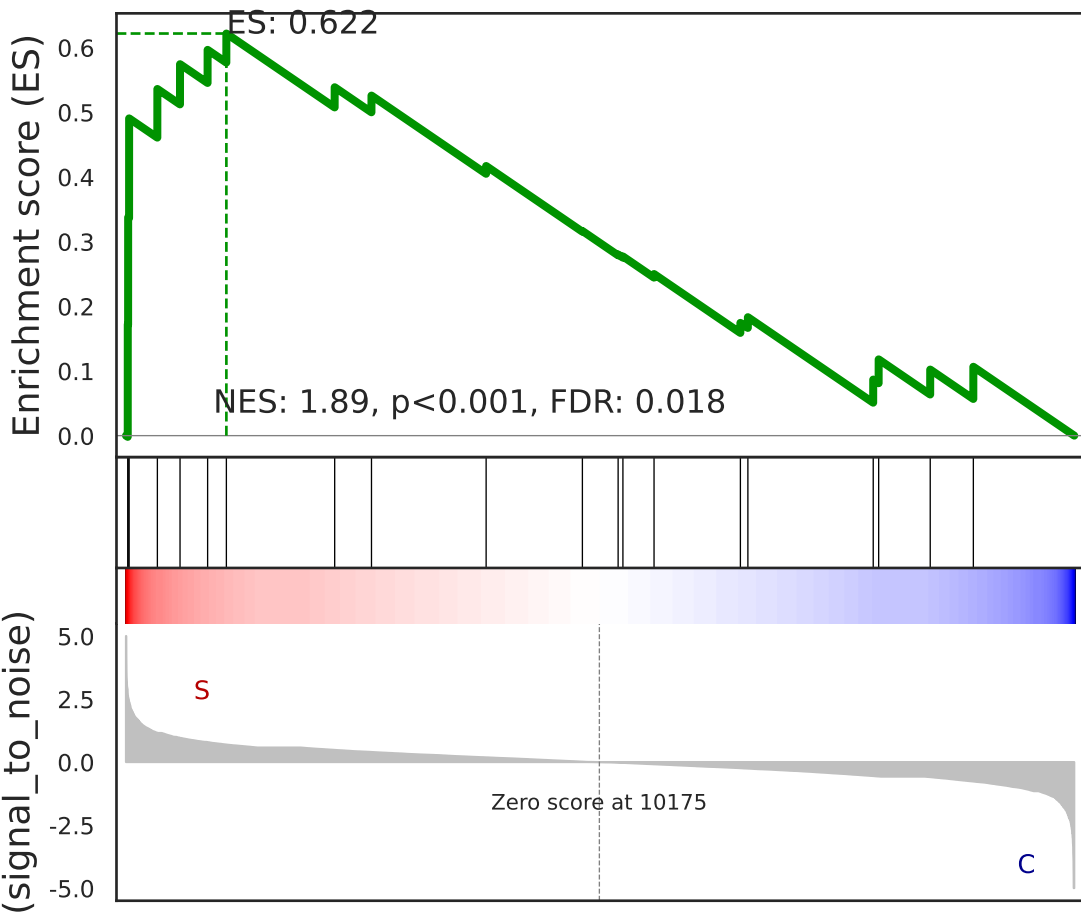

Supplement: Supplementary file 429 [file 4_One carbon pool by folate(hsa00670).gsea.pdf › Source data/1.RNA-Seq source data/2.HUVECs/result/1.6.GSEA/S-vs-C/kegg/4_One carbon pool by folate(hsa00670).gsea.pdf]

# One carbon pool by folate(hsa00670)

## Heatmap of the Analyzed GeneSet

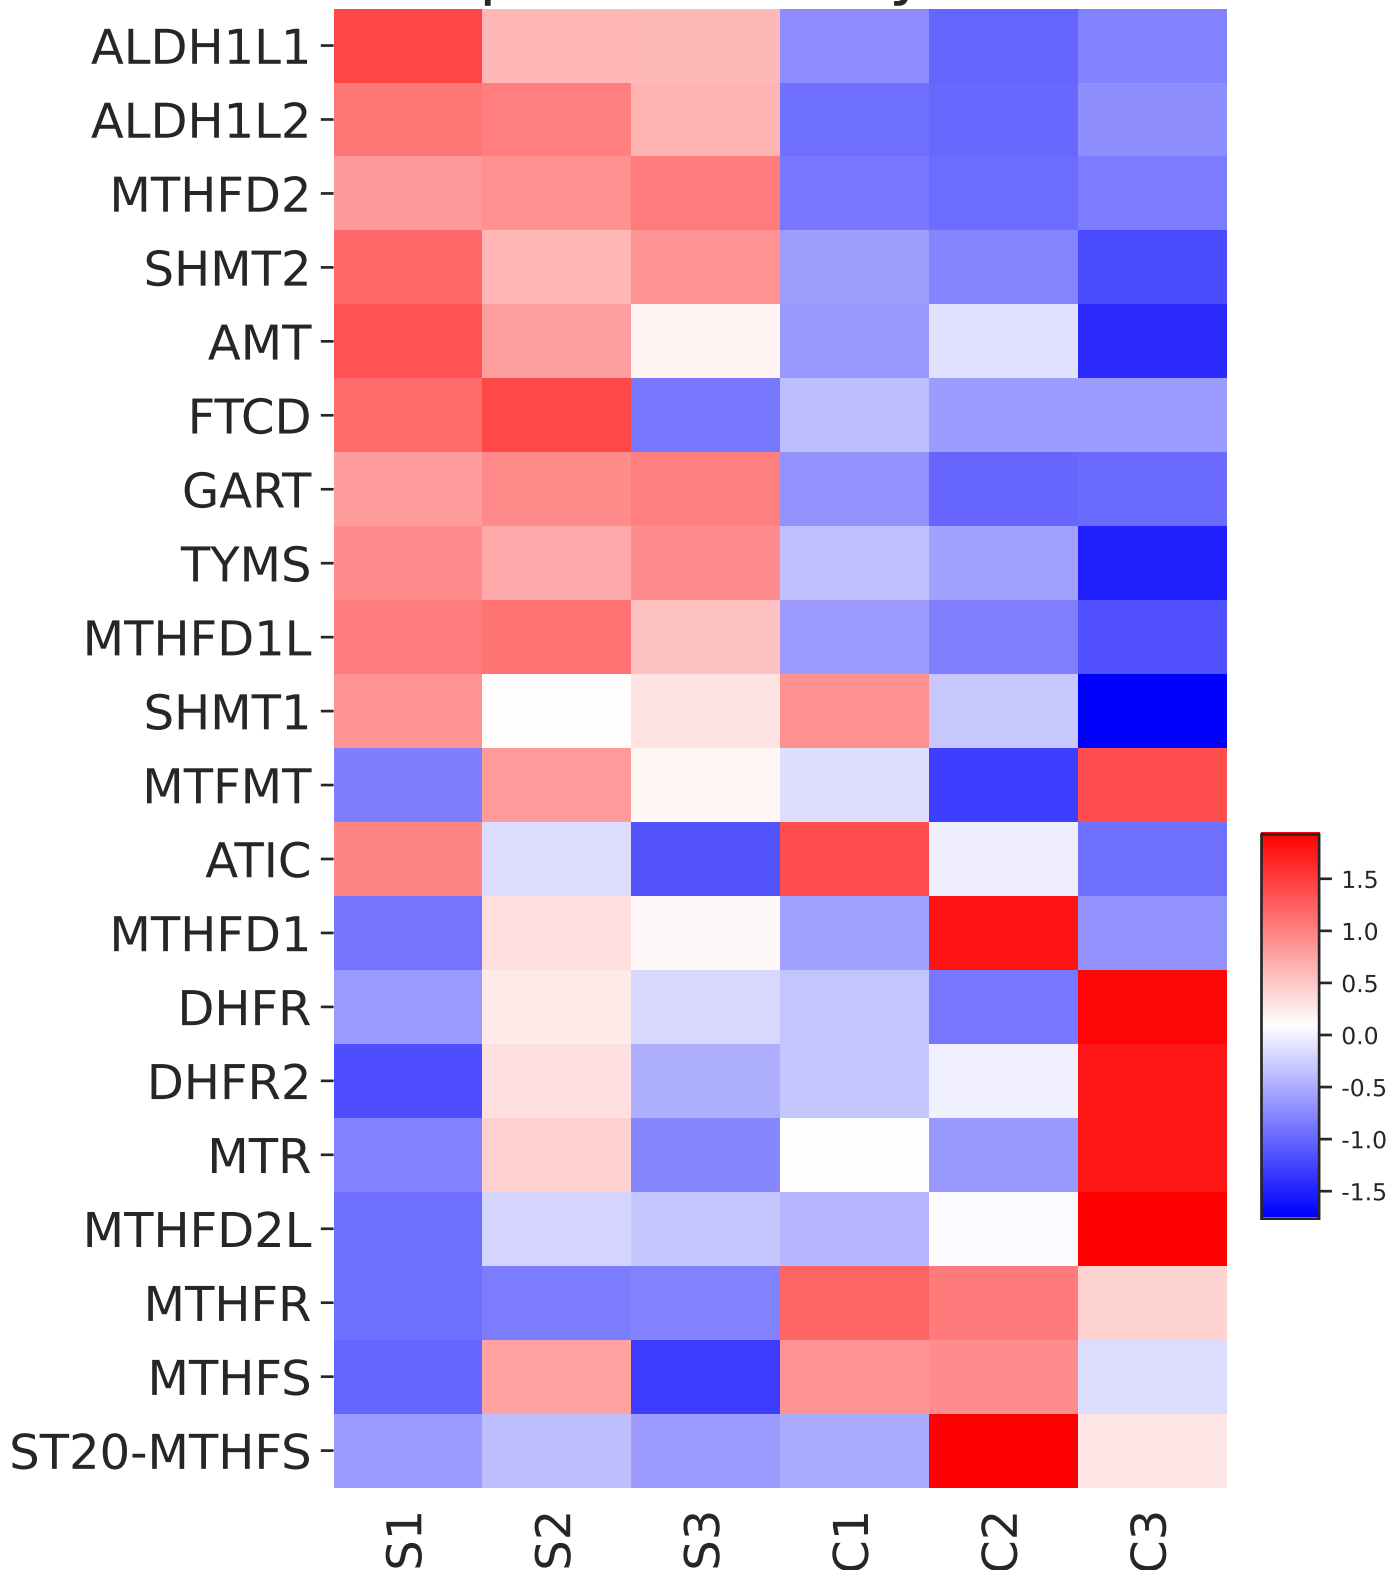

Supplement: Supplementary file 430 [file 4_One carbon pool by folate(hsa00670).heatmap.pdf › Source data/1.RNA-Seq source data/2.HUVECs/result/1.6.GSEA/S-vs-C/kegg/4_One carbon pool by folate(hsa00670).heatmap.pdf]

# DNA replication(hsa03030)

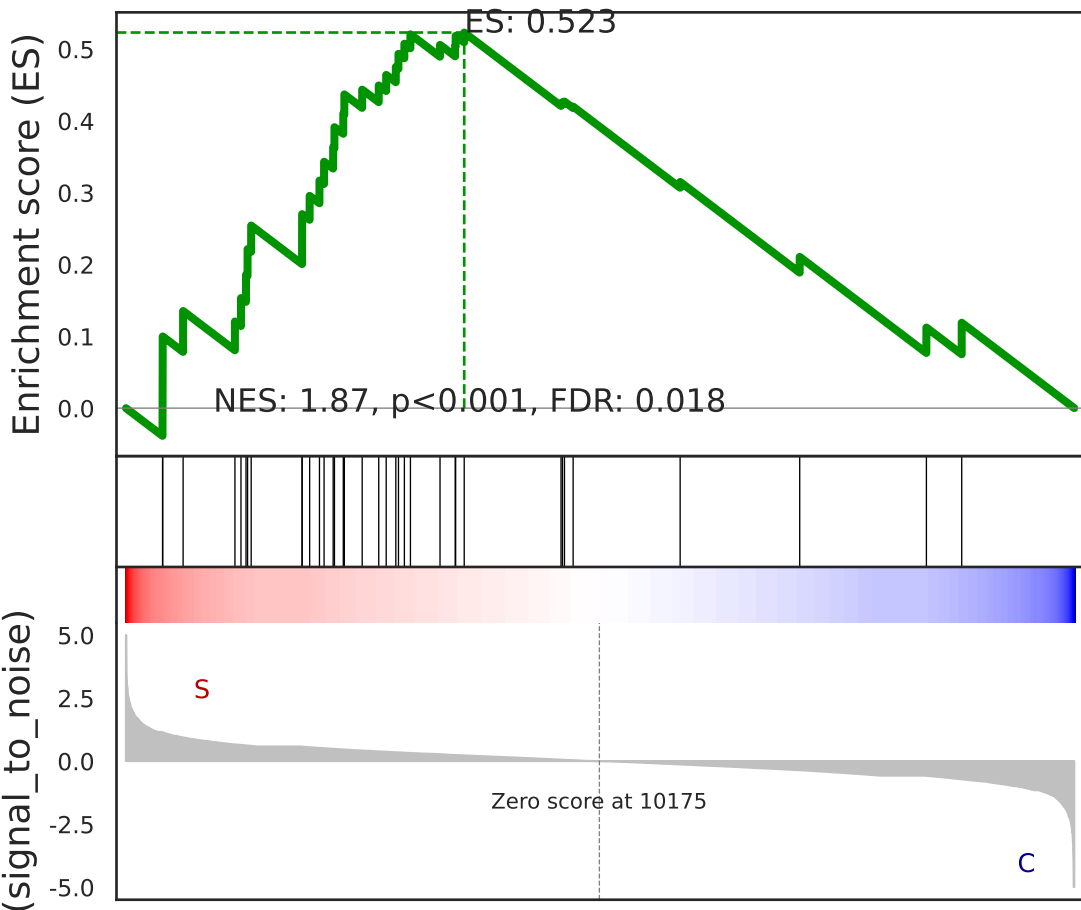

Supplement: Supplementary file 431 [file 5_DNA replication(hsa03030).gsea.pdf › Source data/1.RNA-Seq source data/2.HUVECs/result/1.6.GSEA/S-vs-C/kegg/5_DNA replication(hsa03030).gsea.pdf]

DNA replication(hsa03030)  
Heatmap of the Analyzed GeneSet

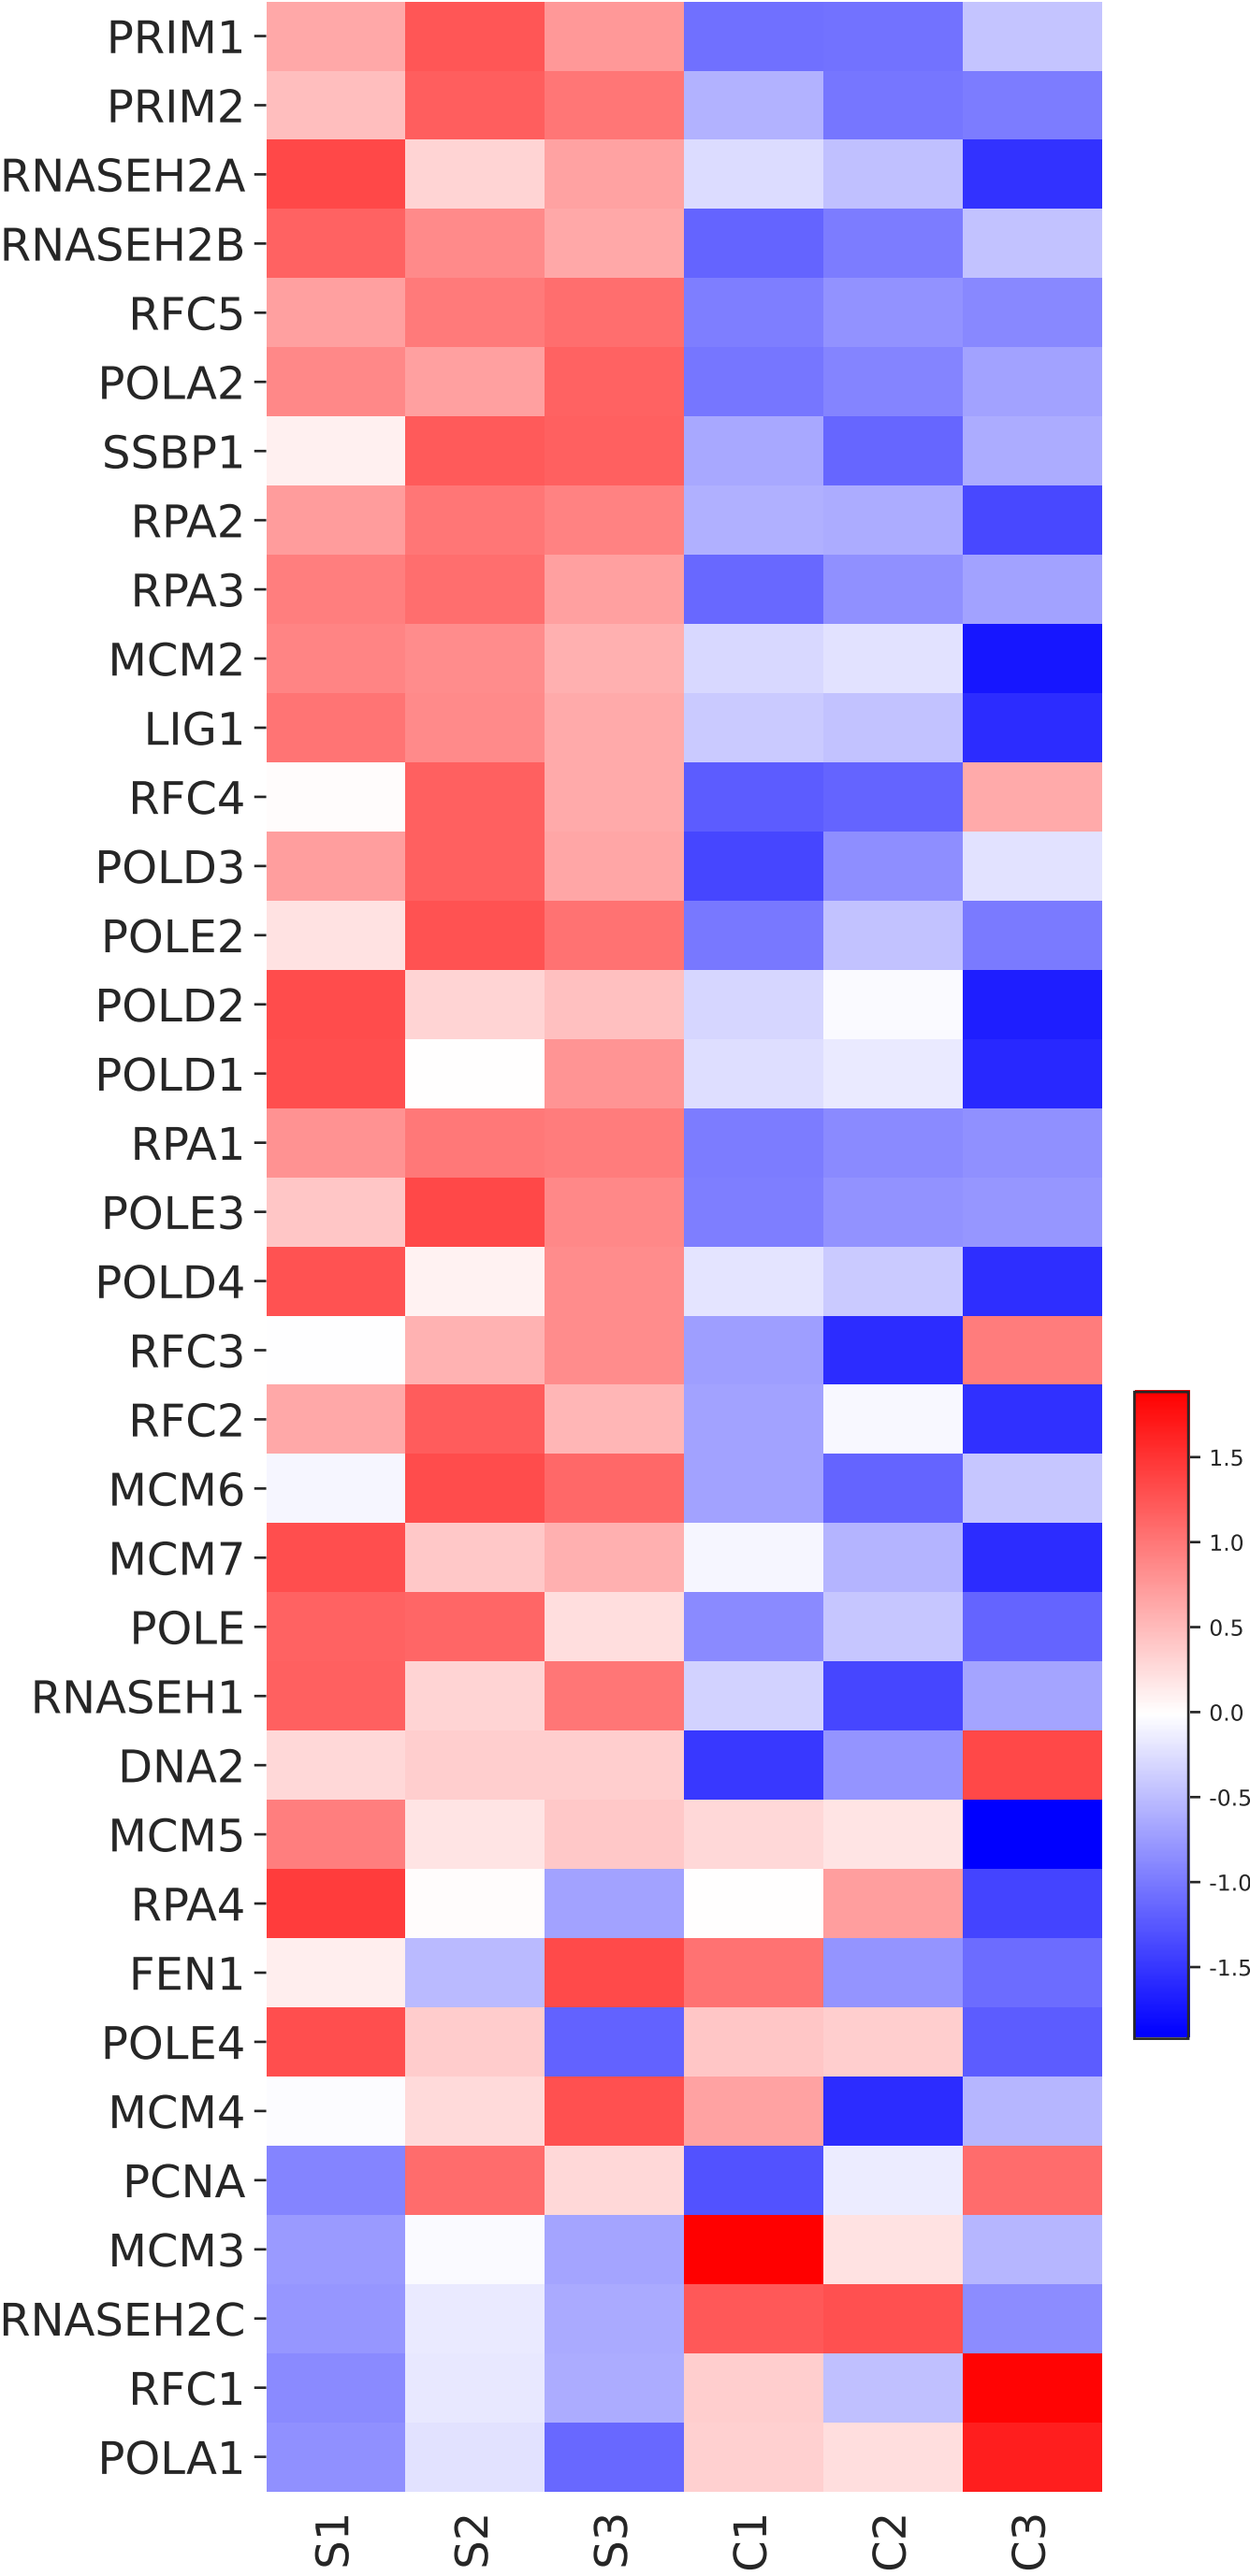

Supplement: Supplementary file 432 [file 5_DNA replication(hsa03030).heatmap.pdf › Source data/1.RNA-Seq source data/2.HUVECs/result/1.6.GSEA/S-vs-C/kegg/5_DNA replication(hsa03030).heatmap.pdf]

# Glutathione metabolism(hsa00480)

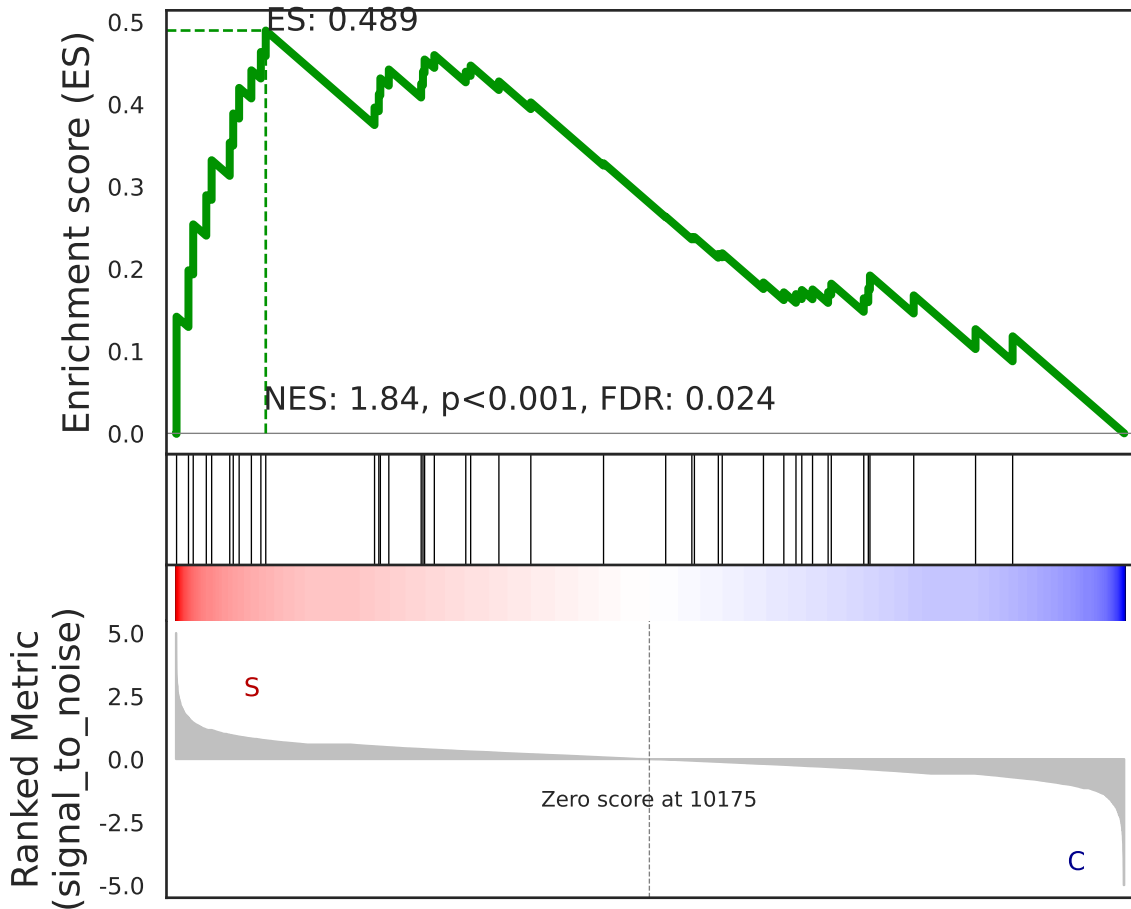

Supplement: Supplementary file 433 [file 6_Glutathione metabolism(hsa00480).gsea.pdf › Source data/1.RNA-Seq source data/2.HUVECs/result/1.6.GSEA/S-vs-C/kegg/6_Glutathione metabolism(hsa00480).gsea.pdf]

Glutathione metabolism(hsa00480)

Heatmap of the Analyzed GeneSet

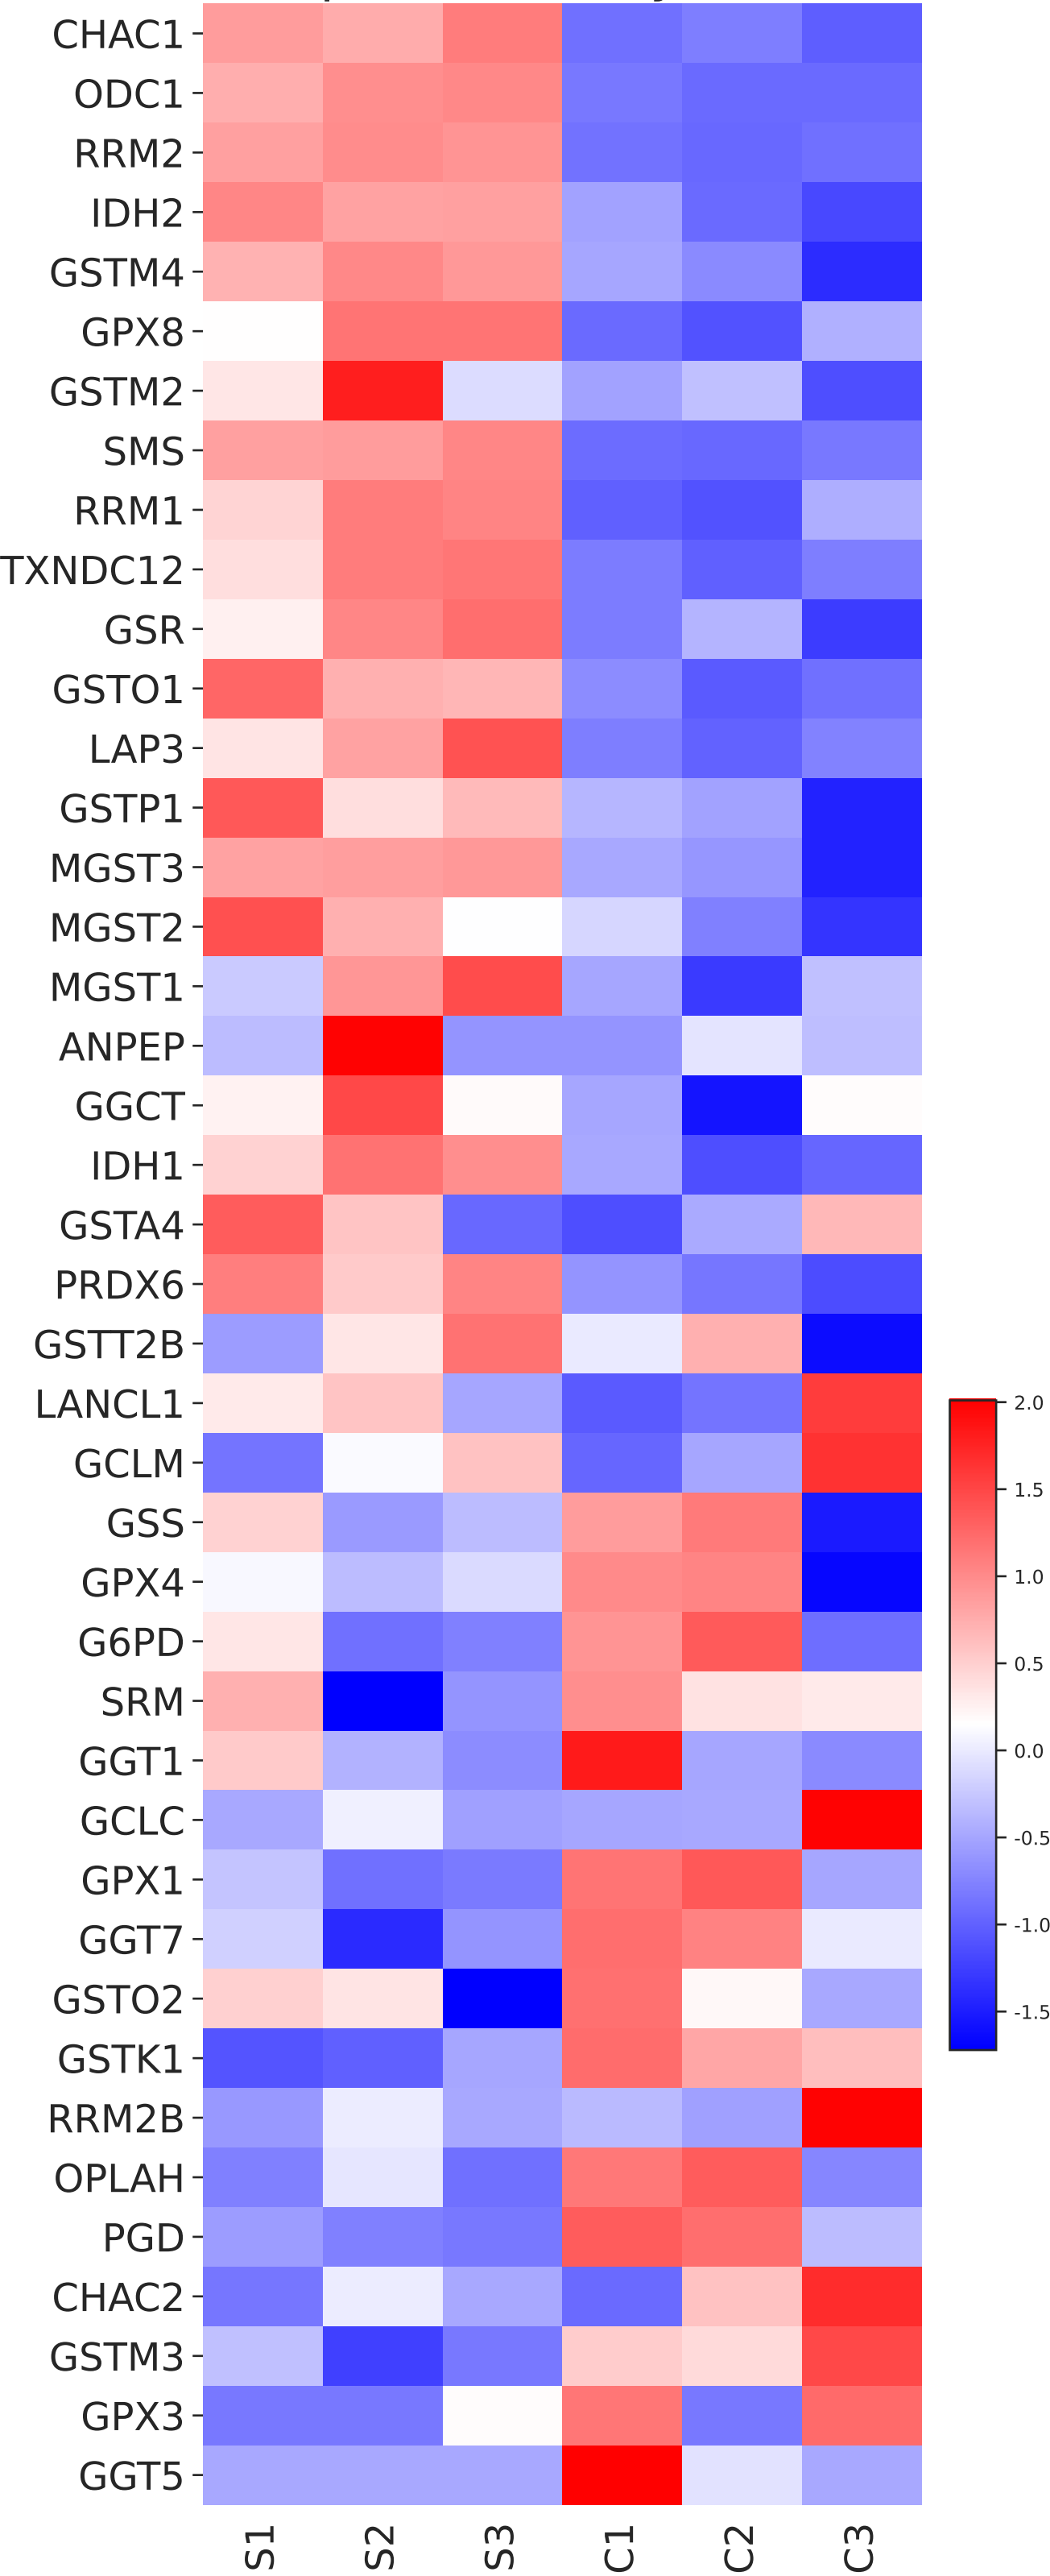

Supplement: Supplementary file 434 [file 6_Glutathione metabolism(hsa00480).heatmap.pdf › Source data/1.RNA-Seq source data/2.HUVECs/result/1.6.GSEA/S-vs-C/kegg/6_Glutathione metabolism(hsa00480).heatmap.pdf]

# Arginine and proline metabolism(hsa00330)

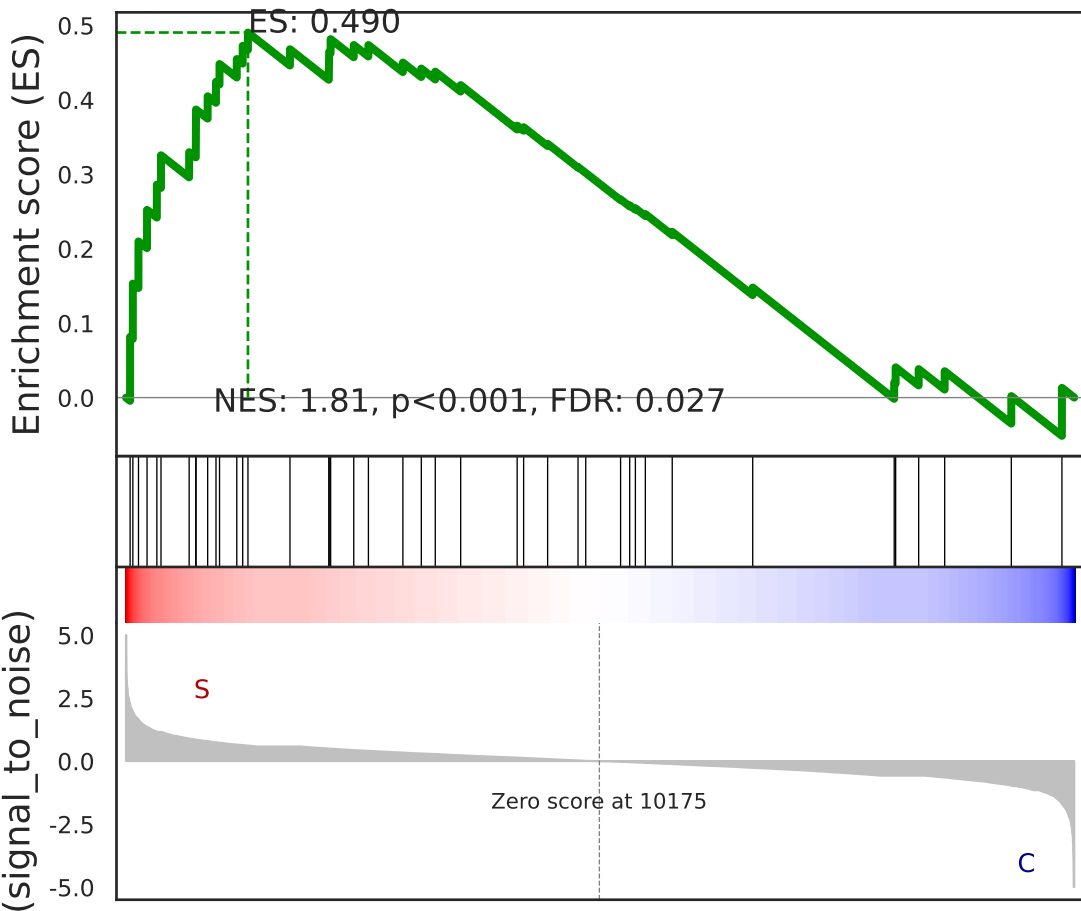

Supplement: Supplementary file 435 [file 7_Arginine and proline metabolism(hsa00330).gsea.pdf › Source data/1.RNA-Seq source data/2.HUVECs/result/1.6.GSEA/S-vs-C/kegg/7_Arginine and proline metabolism(hsa00330).gsea.pdf]

Arginine and proline metabolism(hsa00330)  
Heatmap of the Analyzed GeneSet

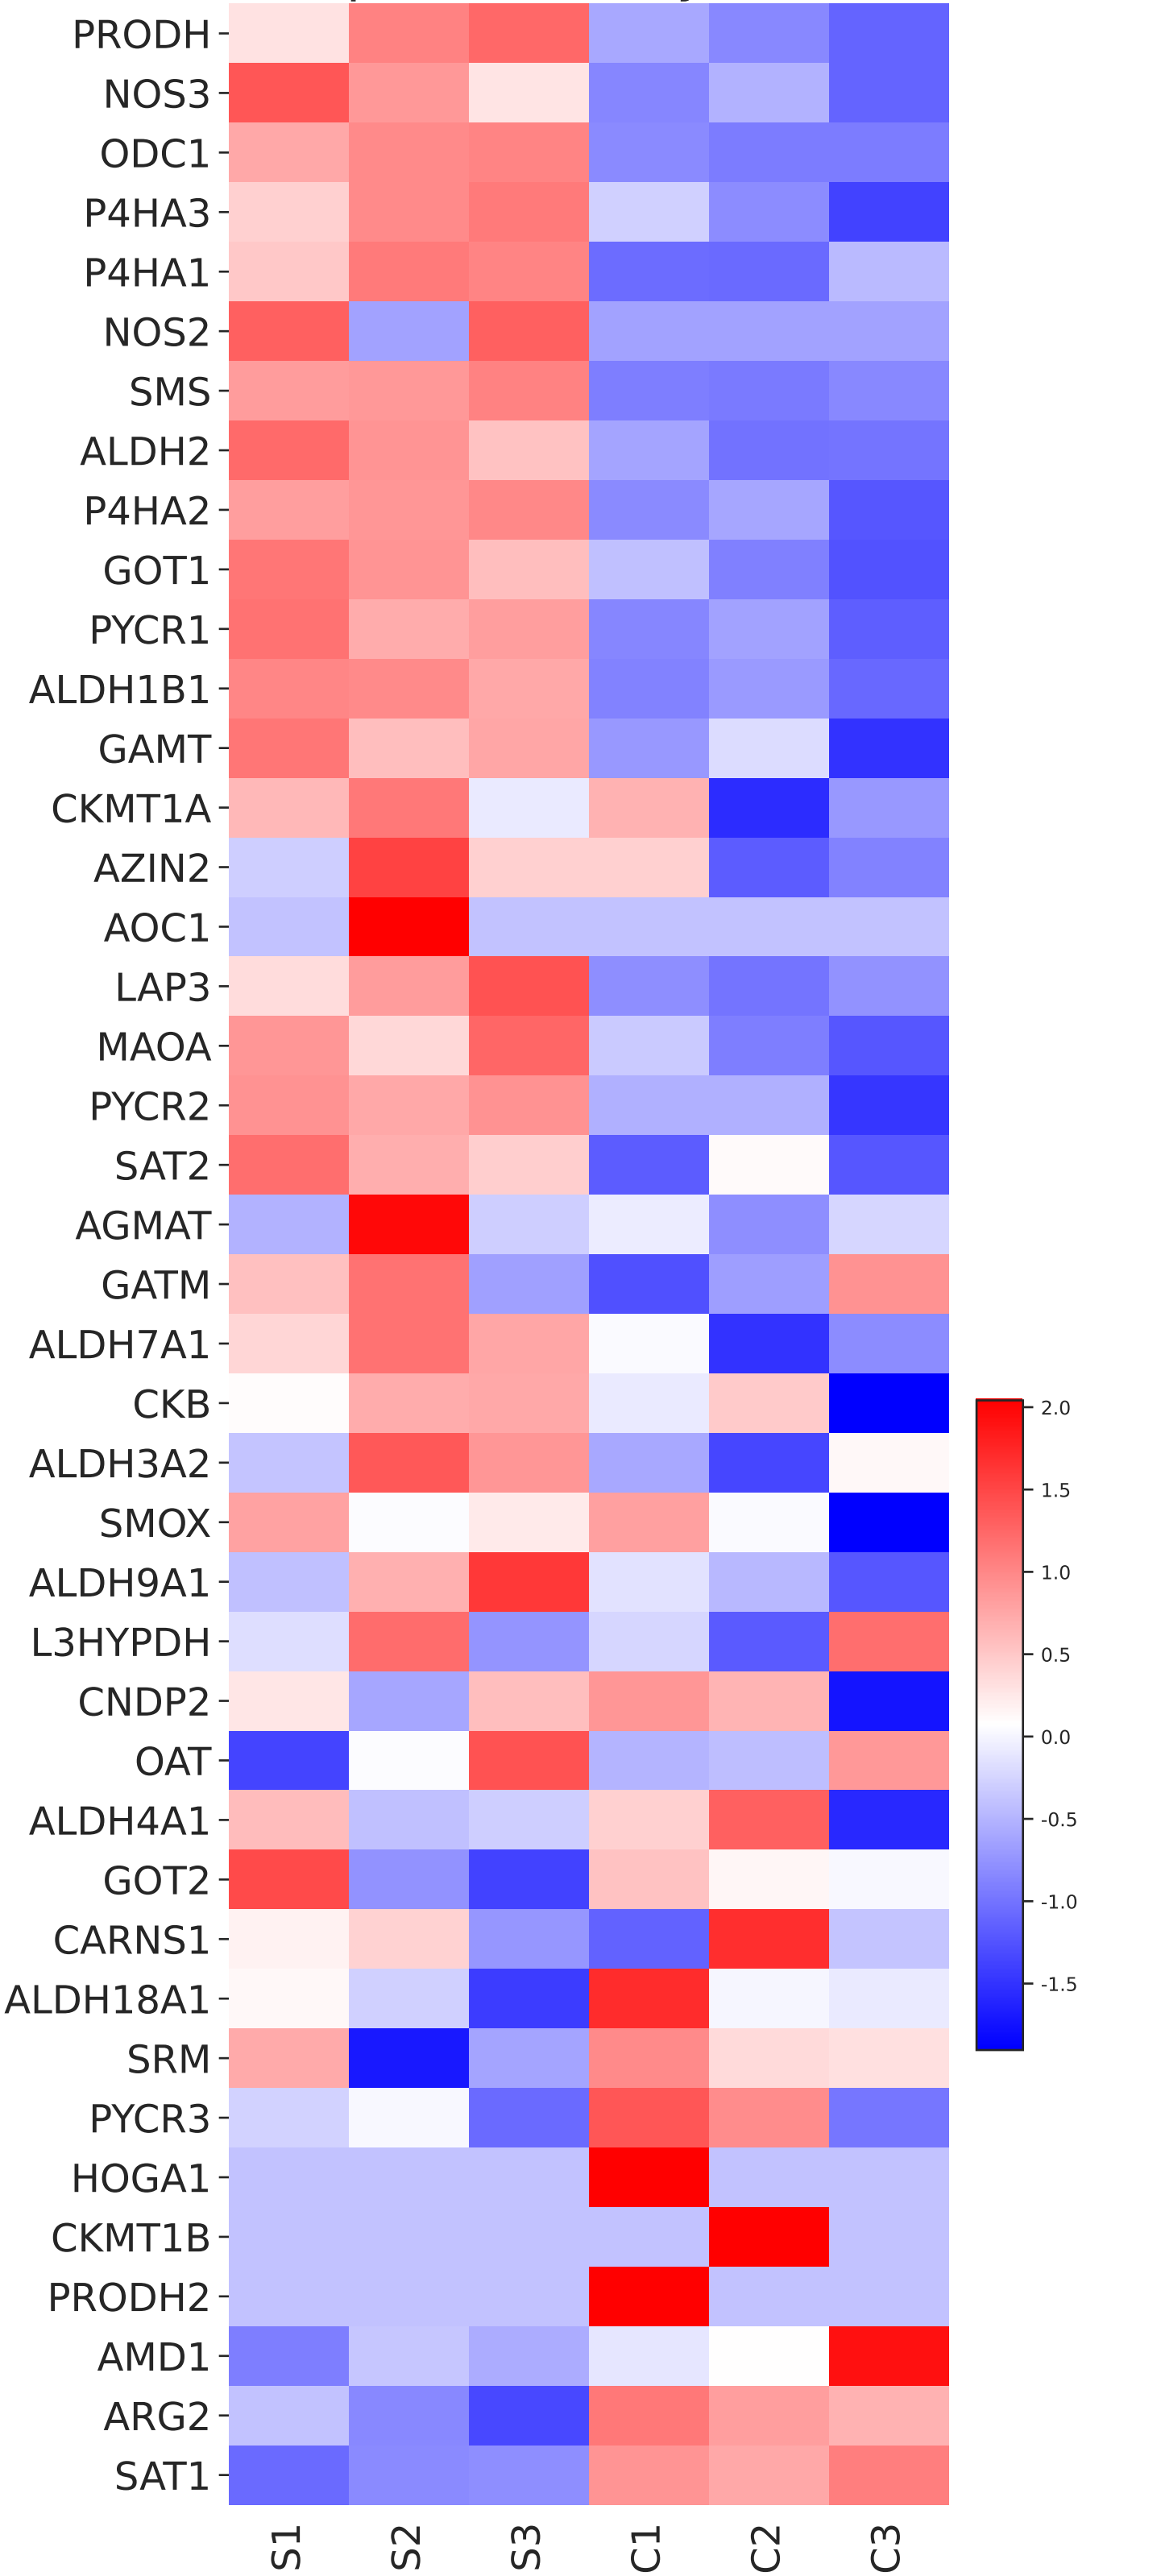

Supplement: Supplementary file 436 [file 7_Arginine and proline metabolism(hsa00330).heatmap.pdf › Source data/1.RNA-Seq source data/2.HUVECs/result/1.6.GSEA/S-vs-C/kegg/7_Arginine and proline metabolism(hsa00330).heatmap.pdf]

# Mismatch repair(hsa03430)

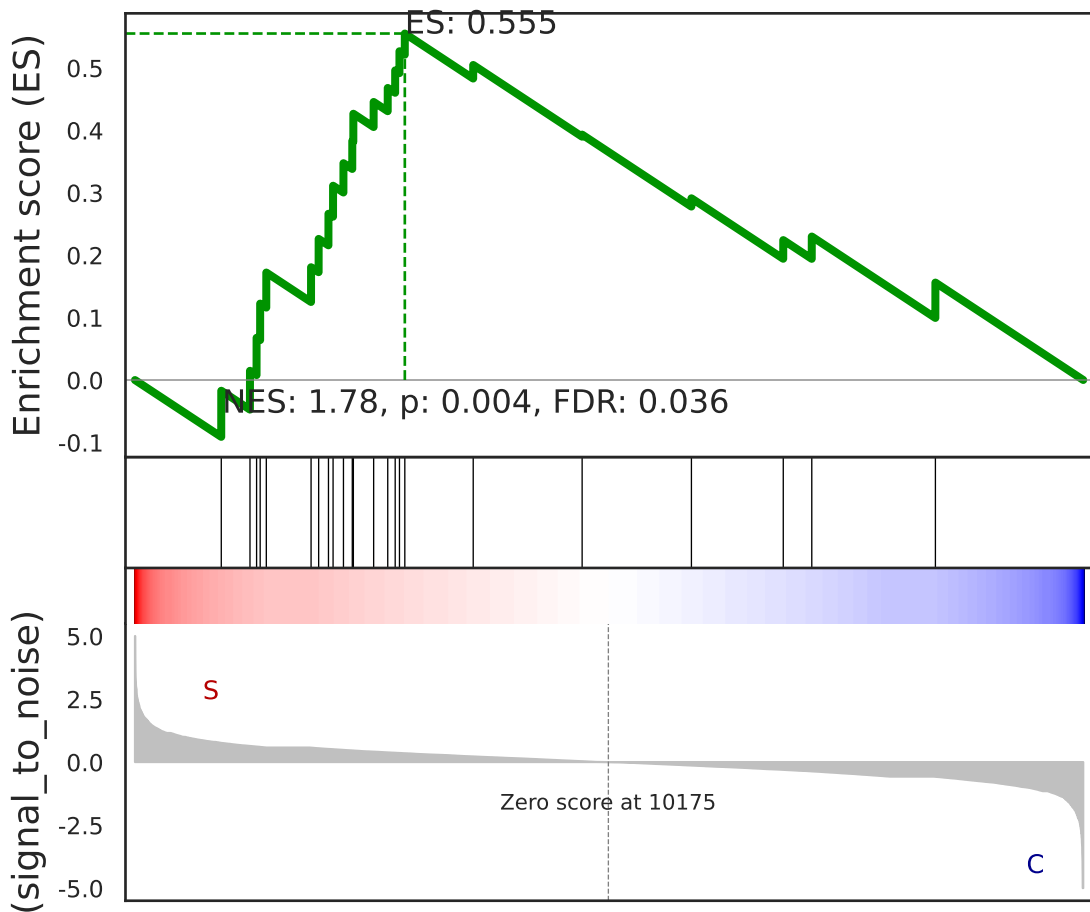

Supplement: Supplementary file 437 [file 8_Mismatch repair(hsa03430).gsea.pdf › Source data/1.RNA-Seq source data/2.HUVECs/result/1.6.GSEA/S-vs-C/kegg/8_Mismatch repair(hsa03430).gsea.pdf]

Mismatch repair(hsa03430)

Heatmap of the Analyzed GeneSet

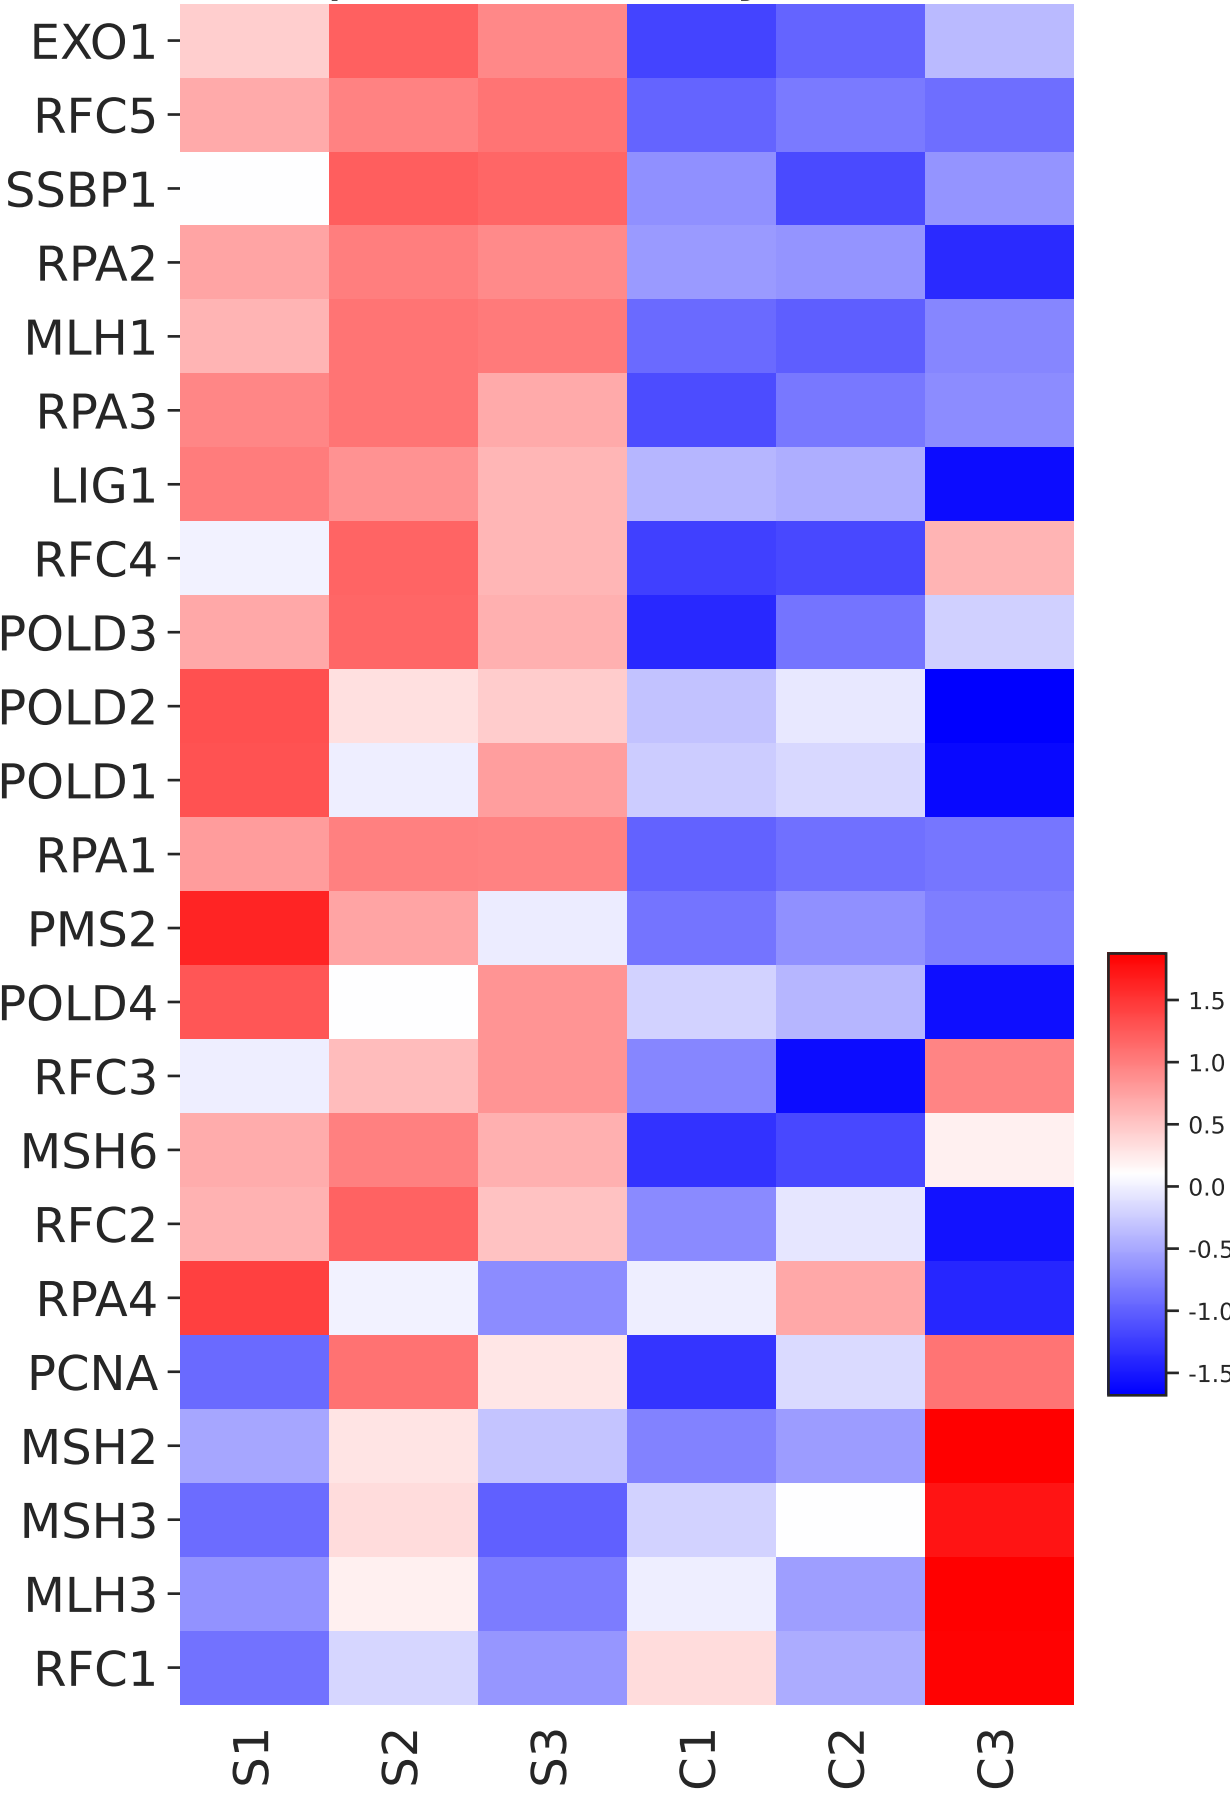

Supplement: Supplementary file 438 [file 8_Mismatch repair(hsa03430).heatmap.pdf › Source data/1.RNA-Seq source data/2.HUVECs/result/1.6.GSEA/S-vs-C/kegg/8_Mismatch repair(hsa03430).heatmap.pdf]

# Cysteine and methionine metabolism(hsa00270)

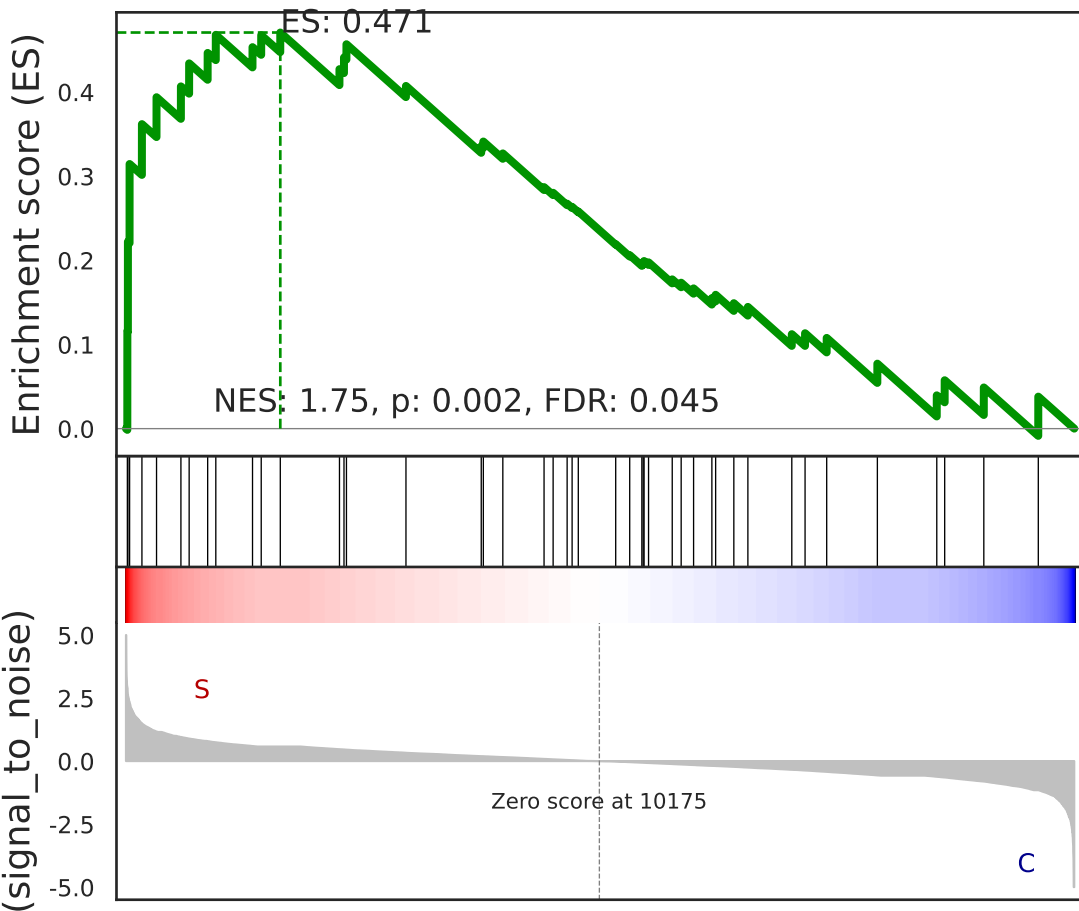

Supplement: Supplementary file 439 [file 9_Cysteine and methionine metabolism(hsa00270).gsea.pdf › Source data/1.RNA-Seq source data/2.HUVECs/result/1.6.GSEA/S-vs-C/kegg/9_Cysteine and methionine metabolism(hsa00270).gsea.pdf]

# Cysteine and methionine metabolism(hsa00270)

## Heatmap of the Analyzed GeneSet

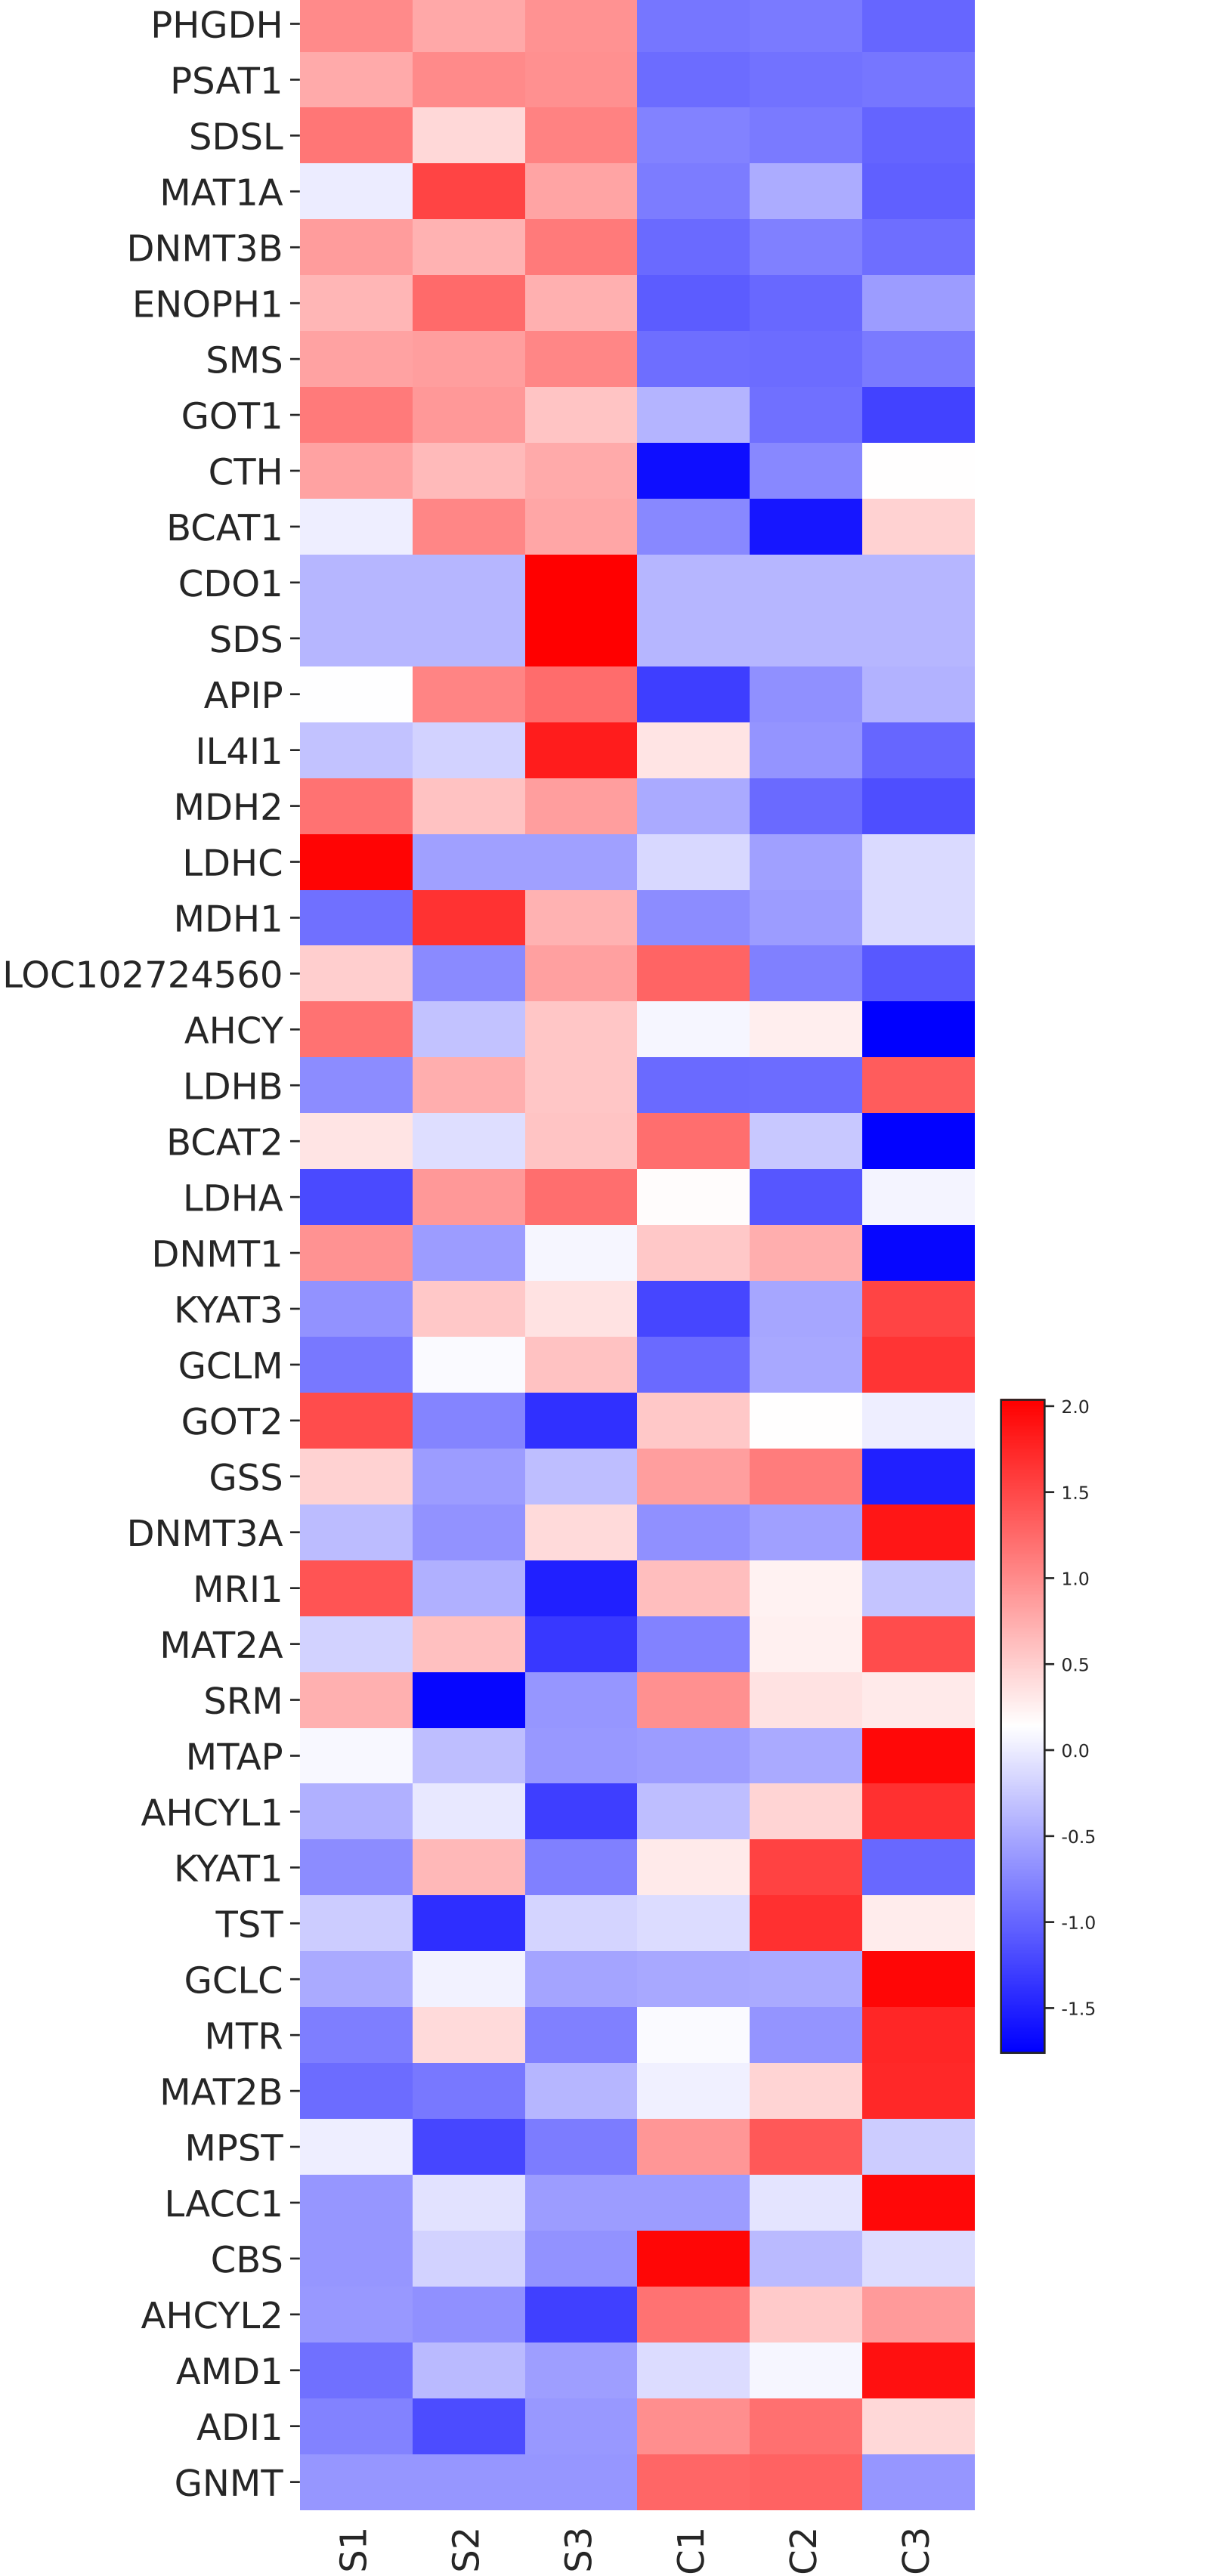

Supplement: Supplementary file 440 [file 9_Cysteine and methionine metabolism(hsa00270).heatmap.pdf › Source data/1.RNA-Seq source data/2.HUVECs/result/1.6.GSEA/S-vs-C/kegg/9_Cysteine and methionine metabolism(hsa00270).heatmap.pdf]

Influenza Viral RNA Transcription and Replication(R-HSA-168273)

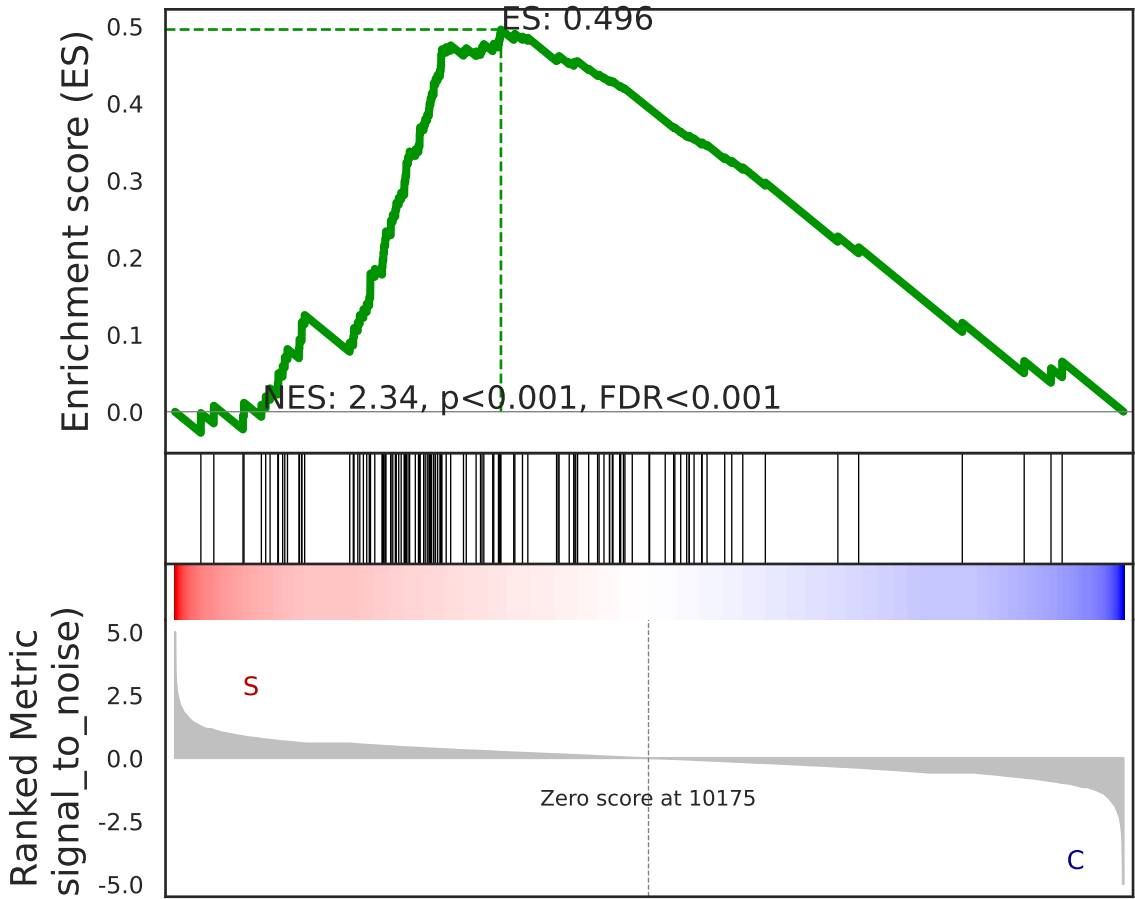

Supplement: Supplementary file 441 [file 10_Influenza Viral RNA Transcription and Replication(R-HSA-168273).gsea.pdf › Source data/1.RNA-Seq source data/2.HUVECs/result/1.6.GSEA/S-vs-C/rct/10_Influenza Viral RNA Transcription and Replication(R-HSA-168273).gsea.pdf]

# Influenza Viral RNA Transcription and Replication(R-HSA-168273)

## Heatmap of the Analyzed GeneSet

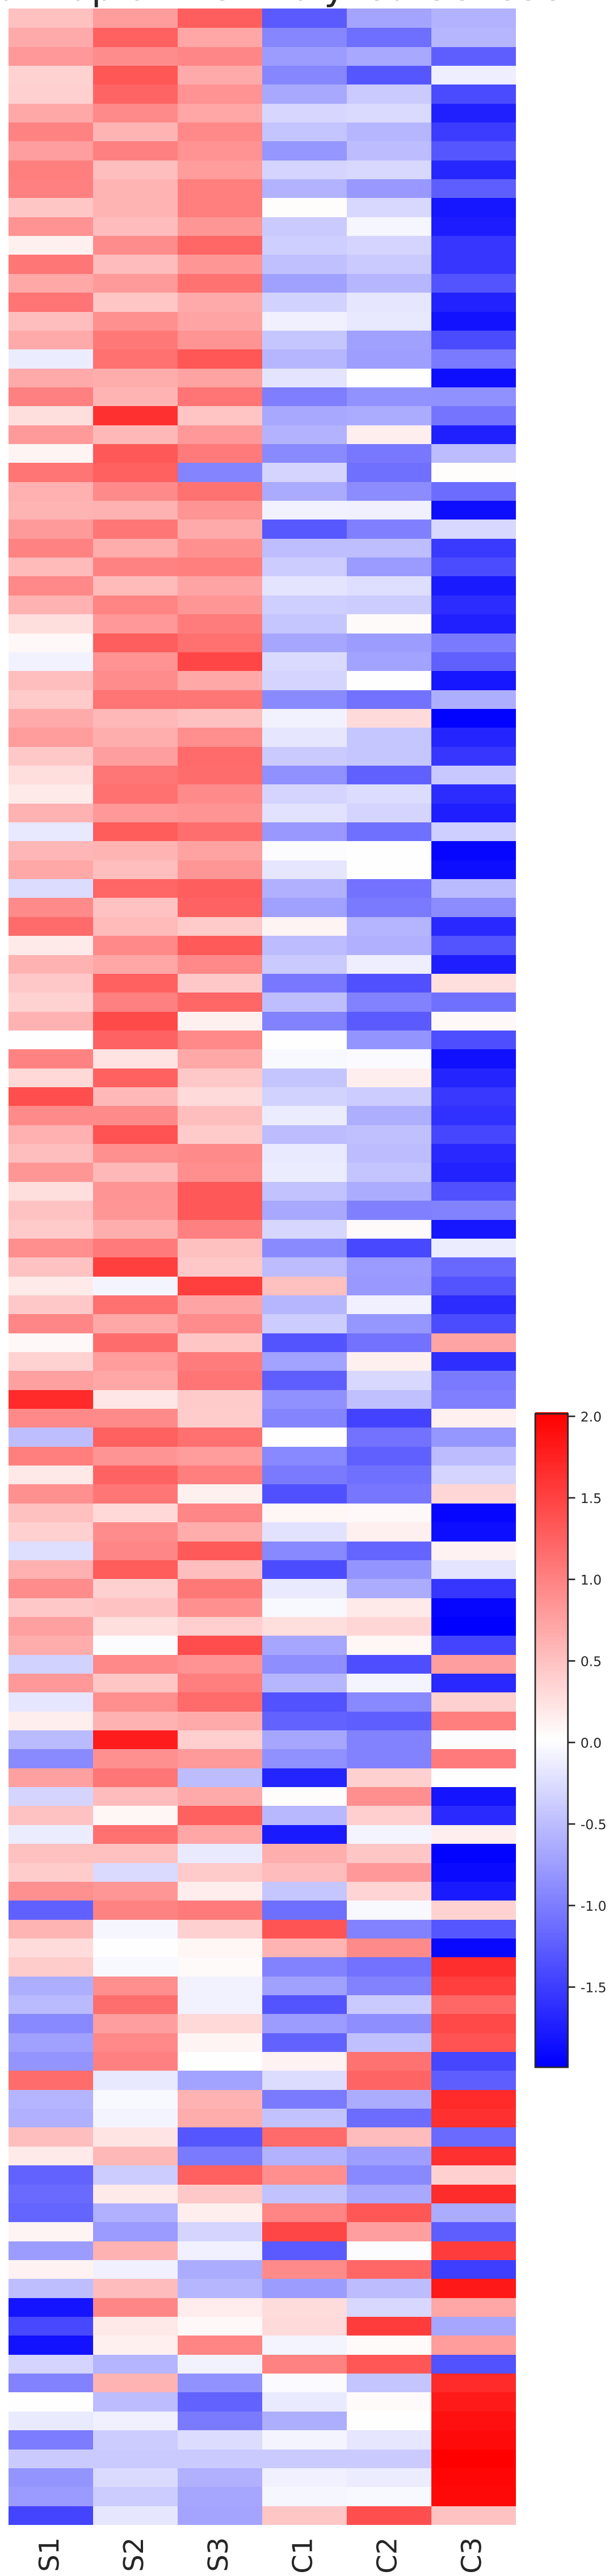

Supplement: Supplementary file 442 [file 10_Influenza Viral RNA Transcription and Replication(R-HSA-168273).heatmap.pdf › Source data/1.RNA-Seq source data/2.HUVECs/result/1.6.GSEA/S-vs-C/rct/10_Influenza Viral RNA Transcription and Replication(R-HSA-168273).heatmap.pdf]

# HATs acetylate histones(R-HSA-3214847)

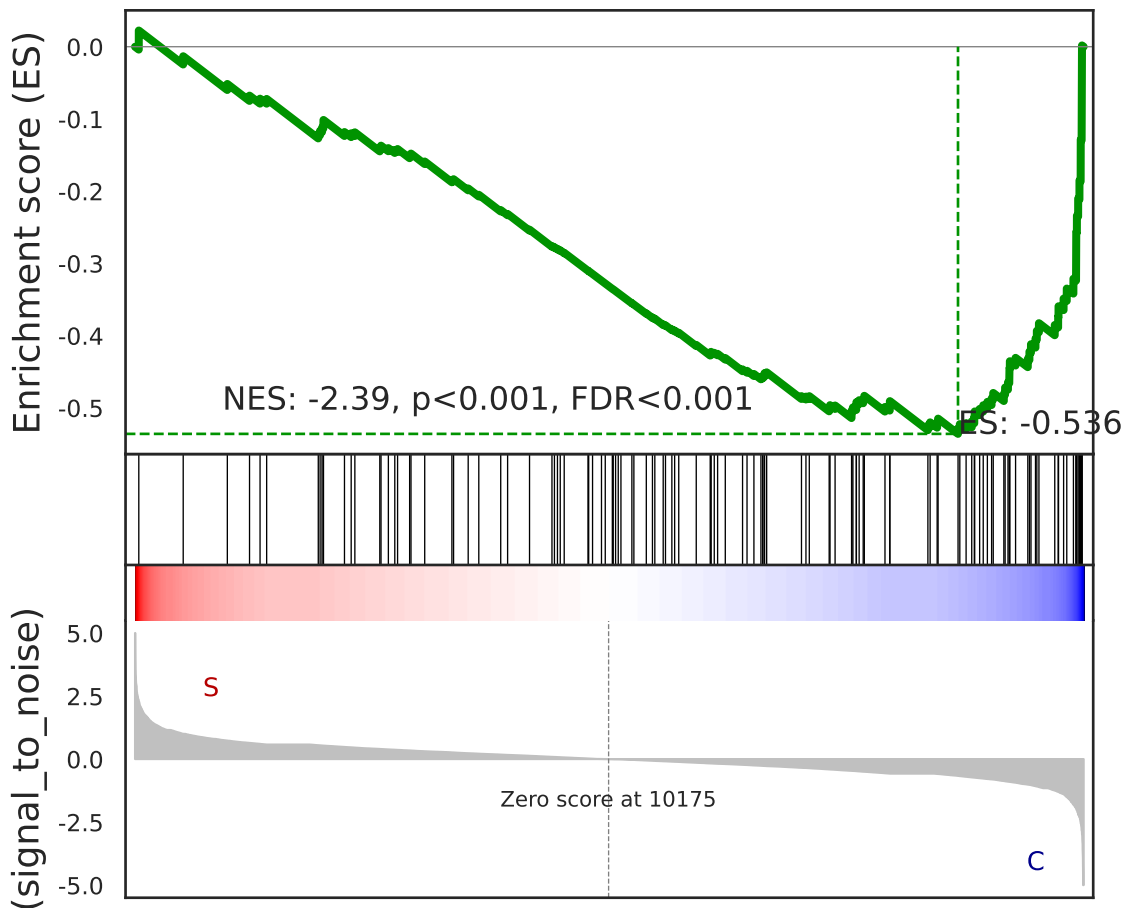

Supplement: Supplementary file 443 [file 1190_HATs acetylate histones(R-HSA-3214847).gsea.pdf › Source data/1.RNA-Seq source data/2.HUVECs/result/1.6.GSEA/S-vs-C/rct/1190_HATs acetylate histones(R-HSA-3214847).gsea.pdf]

# HATs acetylate histones(R-HSA-3214847)

## Heatmap of the Analyzed GeneSet

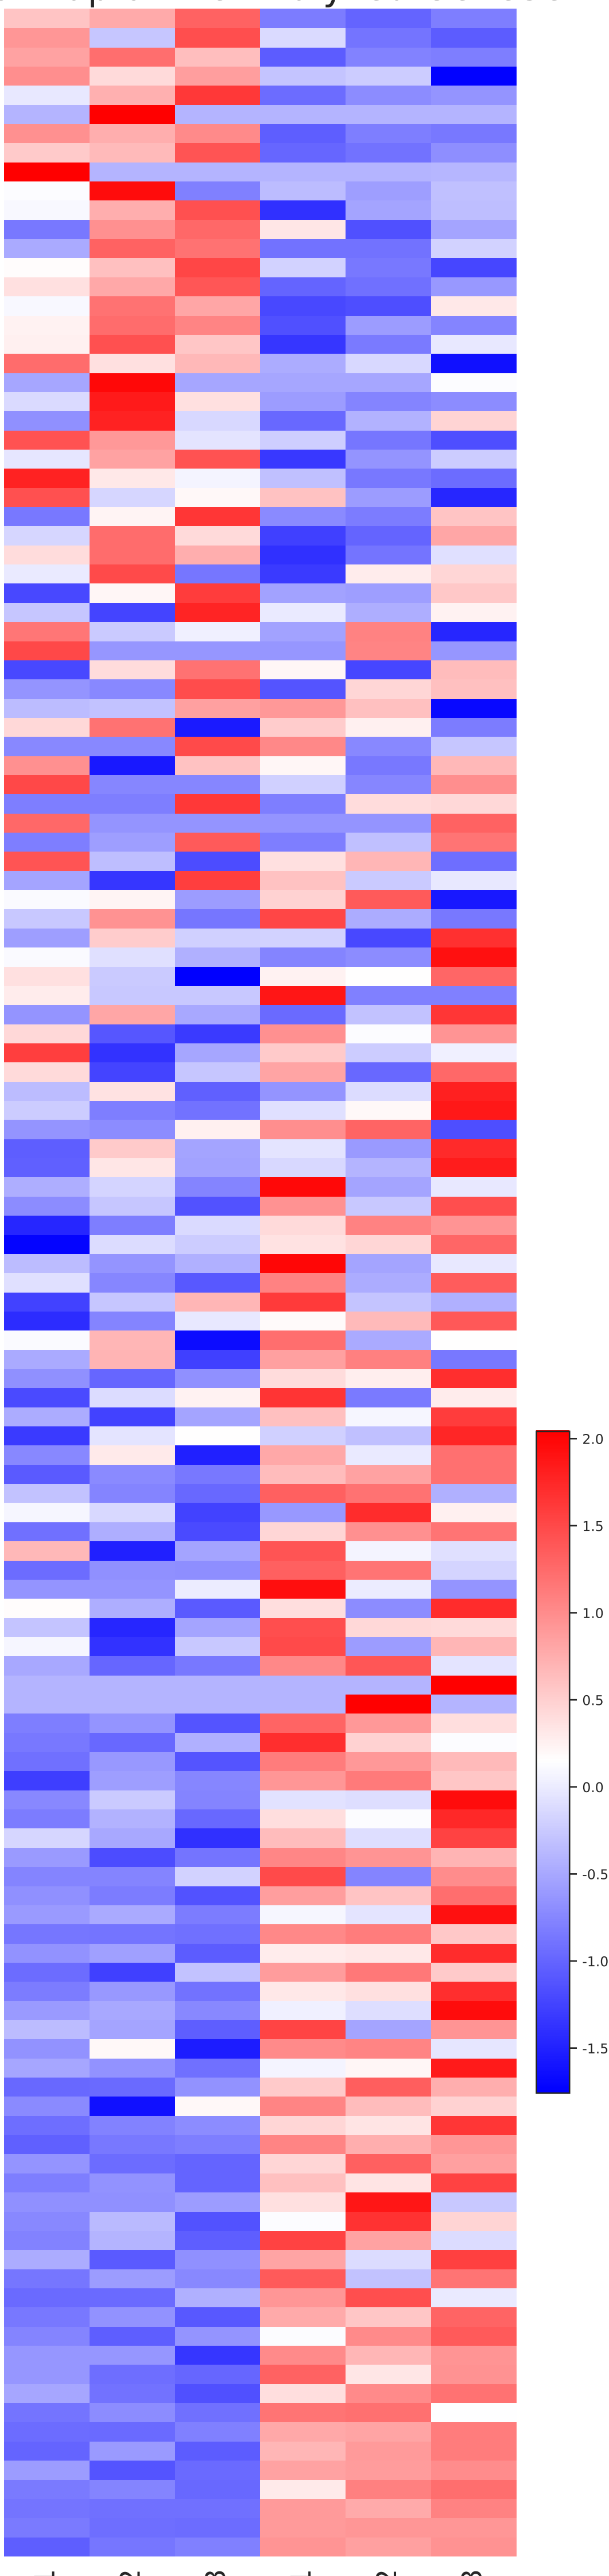

Supplement: Supplementary file 444 [file 1190_HATs acetylate histones(R-HSA-3214847).heatmap.pdf › Source data/1.RNA-Seq source data/2.HUVECs/result/1.6.GSEA/S-vs-C/rct/1190_HATs acetylate histones(R-HSA-3214847).heatmap.pdf]

# Pre-NOTCH Transcription and Translation(R-HSA-1912408)

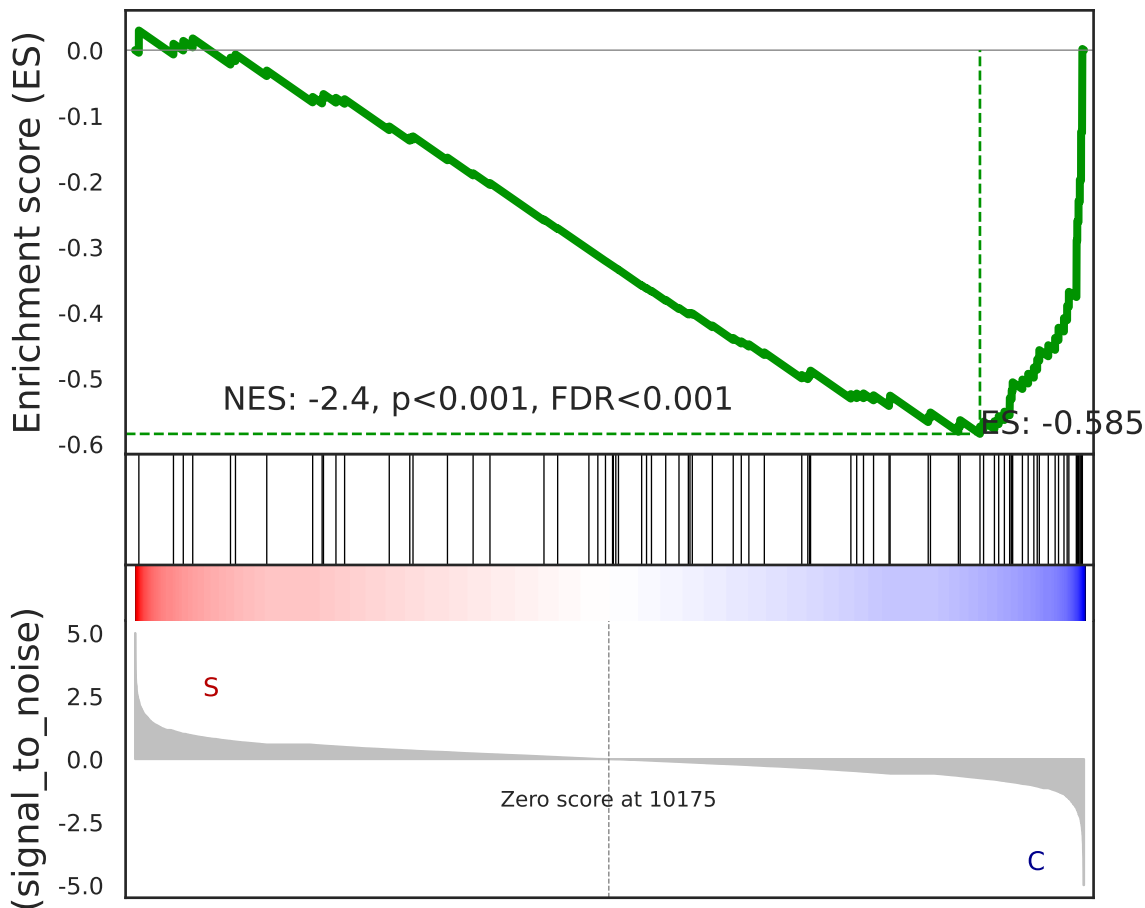

Supplement: Supplementary file 445 [file 1191_Pre-NOTCH Transcription and Translation(R-HSA-1912408).gsea.pdf › Source data/1.RNA-Seq source data/2.HUVECs/result/1.6.GSEA/S-vs-C/rct/1191_Pre-NOTCH Transcription and Translation(R-HSA-1912408).gsea.pdf]

Pre-NOTCH Transcription and Translation(R-HSA-1912408)  
Heatmap of the Analyzed GeneSet

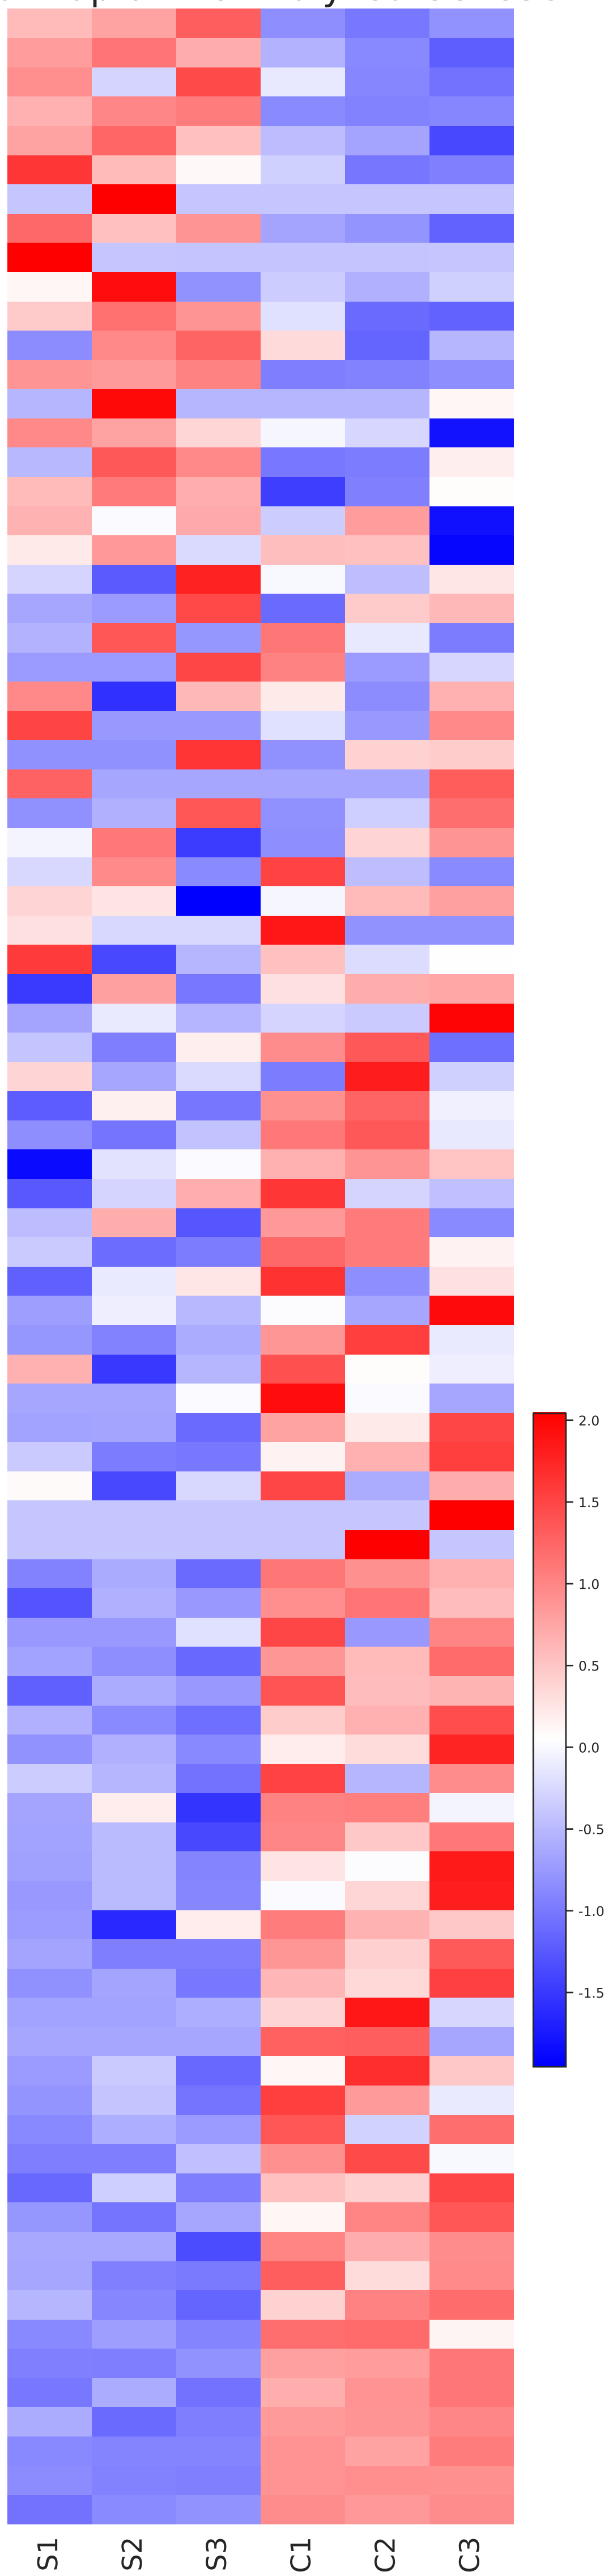

Supplement: Supplementary file 446 [file 1191_Pre-NOTCH Transcription and Translation(R-HSA-1912408).heatmap.pdf › Source data/1.RNA-Seq source data/2.HUVECs/result/1.6.GSEA/S-vs-C/rct/1191_Pre-NOTCH Transcription and Translation(R-HSA-1912408).heatmap.pdf]

# HDACs deacetylate histones(R-HSA-3214815)

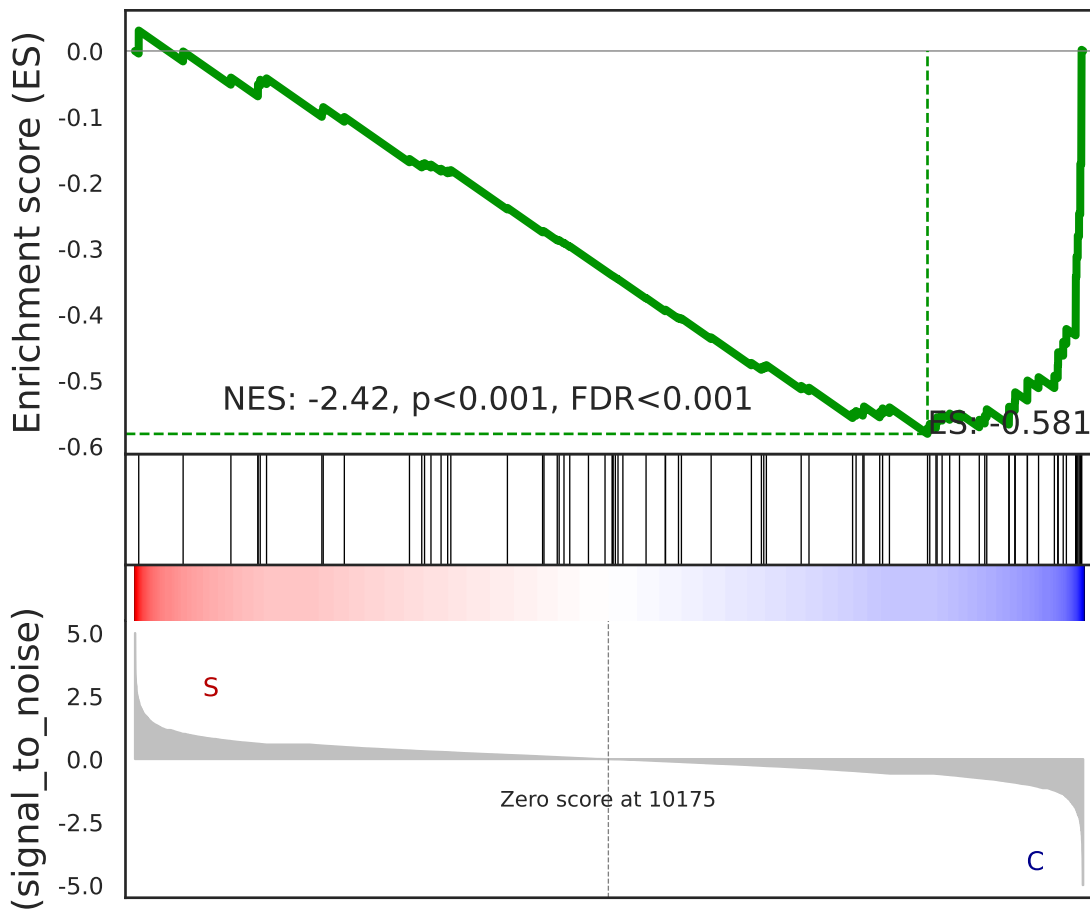

Supplement: Supplementary file 447 [file 1192_HDACs deacetylate histones(R-HSA-3214815).gsea.pdf › Source data/1.RNA-Seq source data/2.HUVECs/result/1.6.GSEA/S-vs-C/rct/1192_HDACs deacetylate histones(R-HSA-3214815).gsea.pdf]

# HDACs deacetylate histones(R-HSA-3214815)

## Heatmap of the Analyzed GeneSet

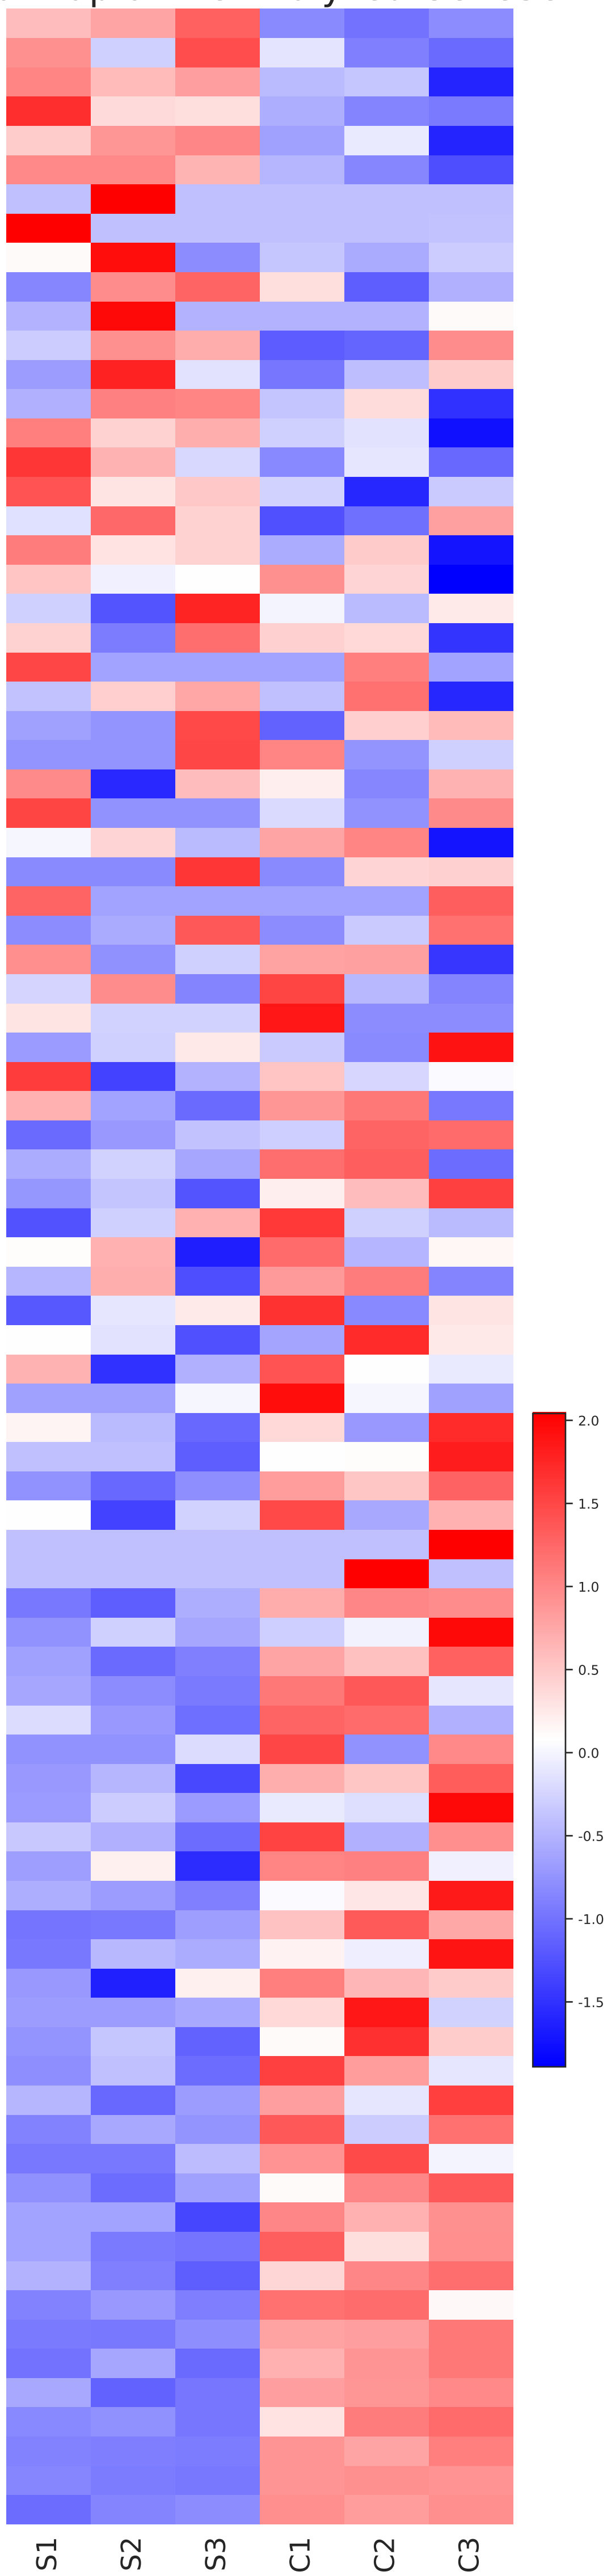

Supplement: Supplementary file 448 [file 1192_HDACs deacetylate histones(R-HSA-3214815).heatmap.pdf › Source data/1.RNA-Seq source data/2.HUVECs/result/1.6.GSEA/S-vs-C/rct/1192_HDACs deacetylate histones(R-HSA-3214815).heatmap.pdf]

# RNA Polymerase I Promoter Opening(R-HSA-73728)

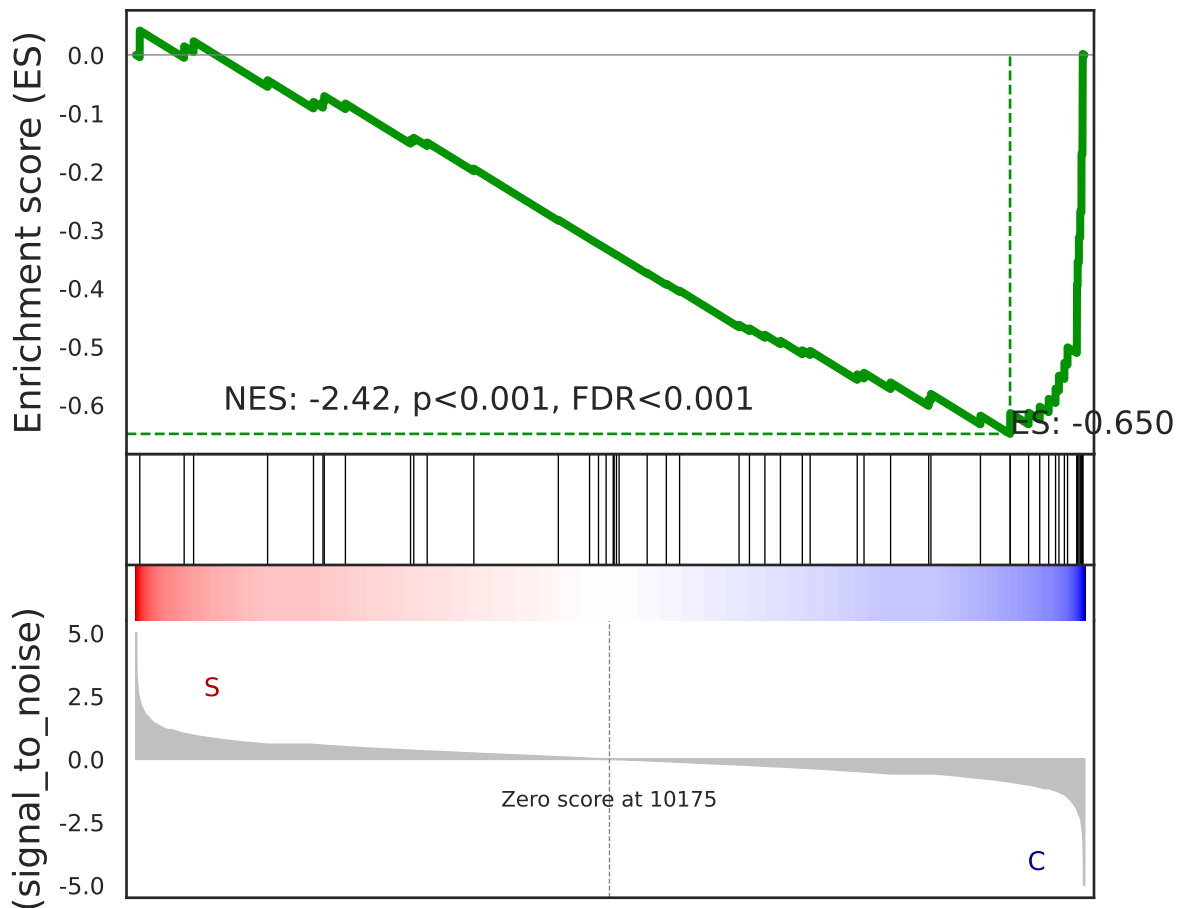

Supplement: Supplementary file 449 [file 1193_RNA Polymerase I Promoter Opening(R-HSA-73728).gsea.pdf › Source data/1.RNA-Seq source data/2.HUVECs/result/1.6.GSEA/S-vs-C/rct/1193_RNA Polymerase I Promoter Opening(R-HSA-73728).gsea.pdf]

# RNA Polymerase I Promoter Opening(R-HSA-73728)

## Heatmap of the Analyzed GeneSet

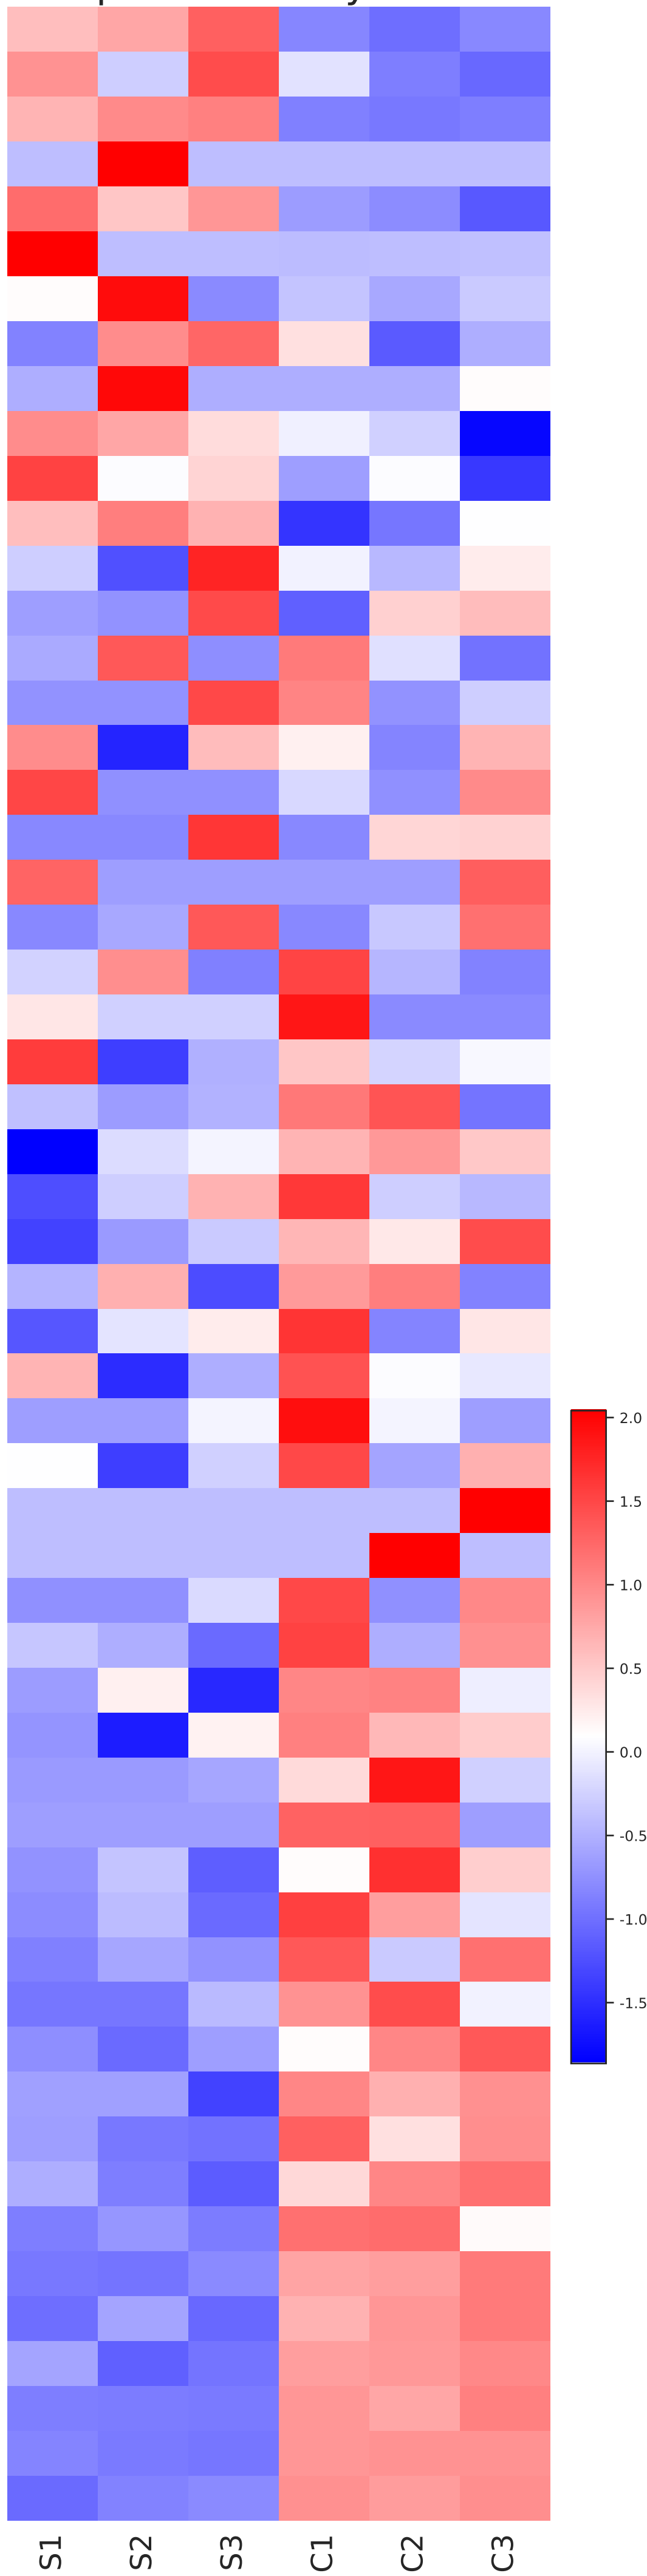

Supplement: Supplementary file 450 [file 1193_RNA Polymerase I Promoter Opening(R-HSA-73728).heatmap.pdf › Source data/1.RNA-Seq source data/2.HUVECs/result/1.6.GSEA/S-vs-C/rct/1193_RNA Polymerase I Promoter Opening(R-HSA-73728).heatmap.pdf]

Activated PKN1 stimulates transcription of AR (androgen r...(R-HSA-5625886)

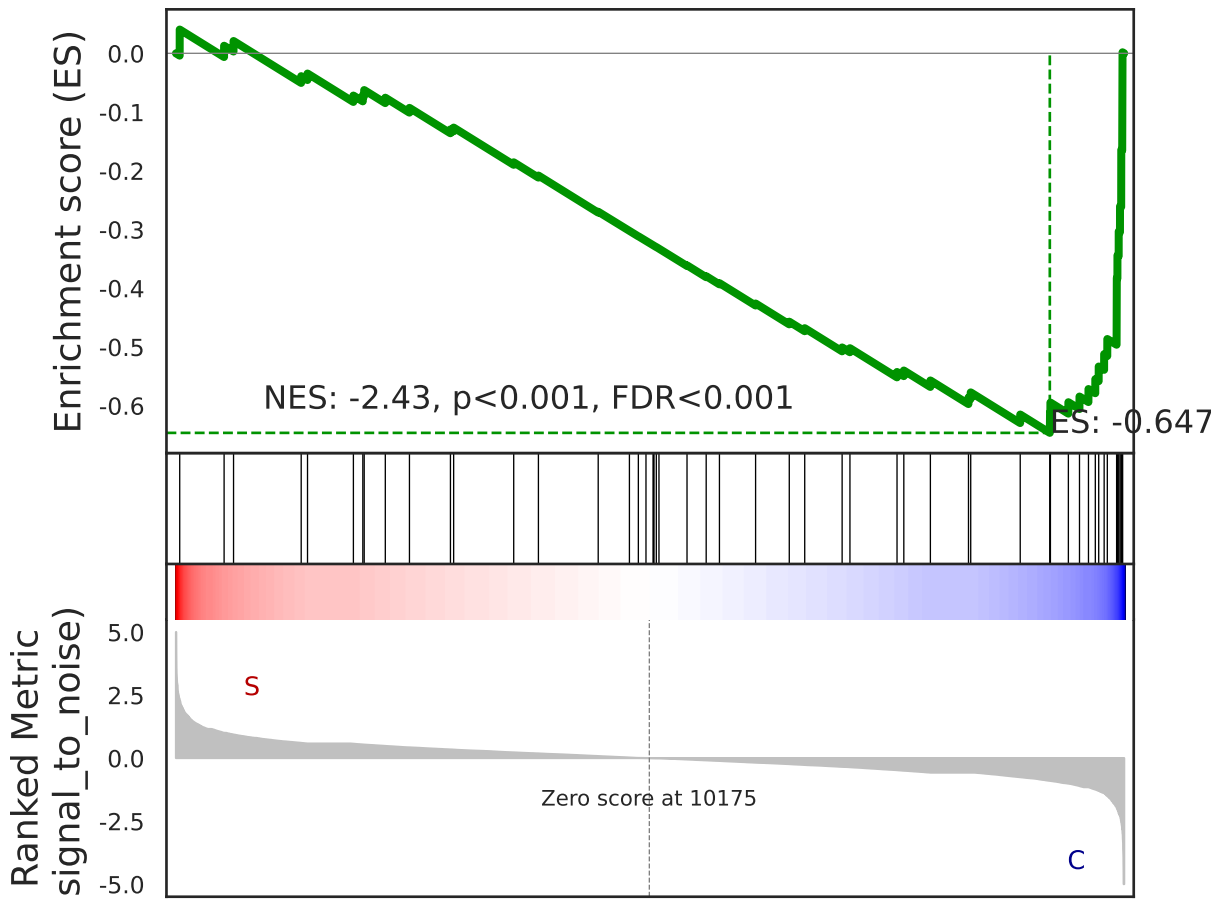

Supplement: Supplementary file 451 [file 1194_Activated PKN1 stimulates transcription of AR (androgen r...(R-HSA-5625886).gsea.pdf › Source data/1.RNA-Seq source data/2.HUVECs/result/1.6.GSEA/S-vs-C/rct/1194_Activated PKN1 stimulates transcription of AR (androgen r...(R-HSA-5625886).gsea.pdf]

Activated PKN1 stimulates transcription of AR (androgen r...(R-HSA-5625886)

Heatmap of the Analyzed GeneSet

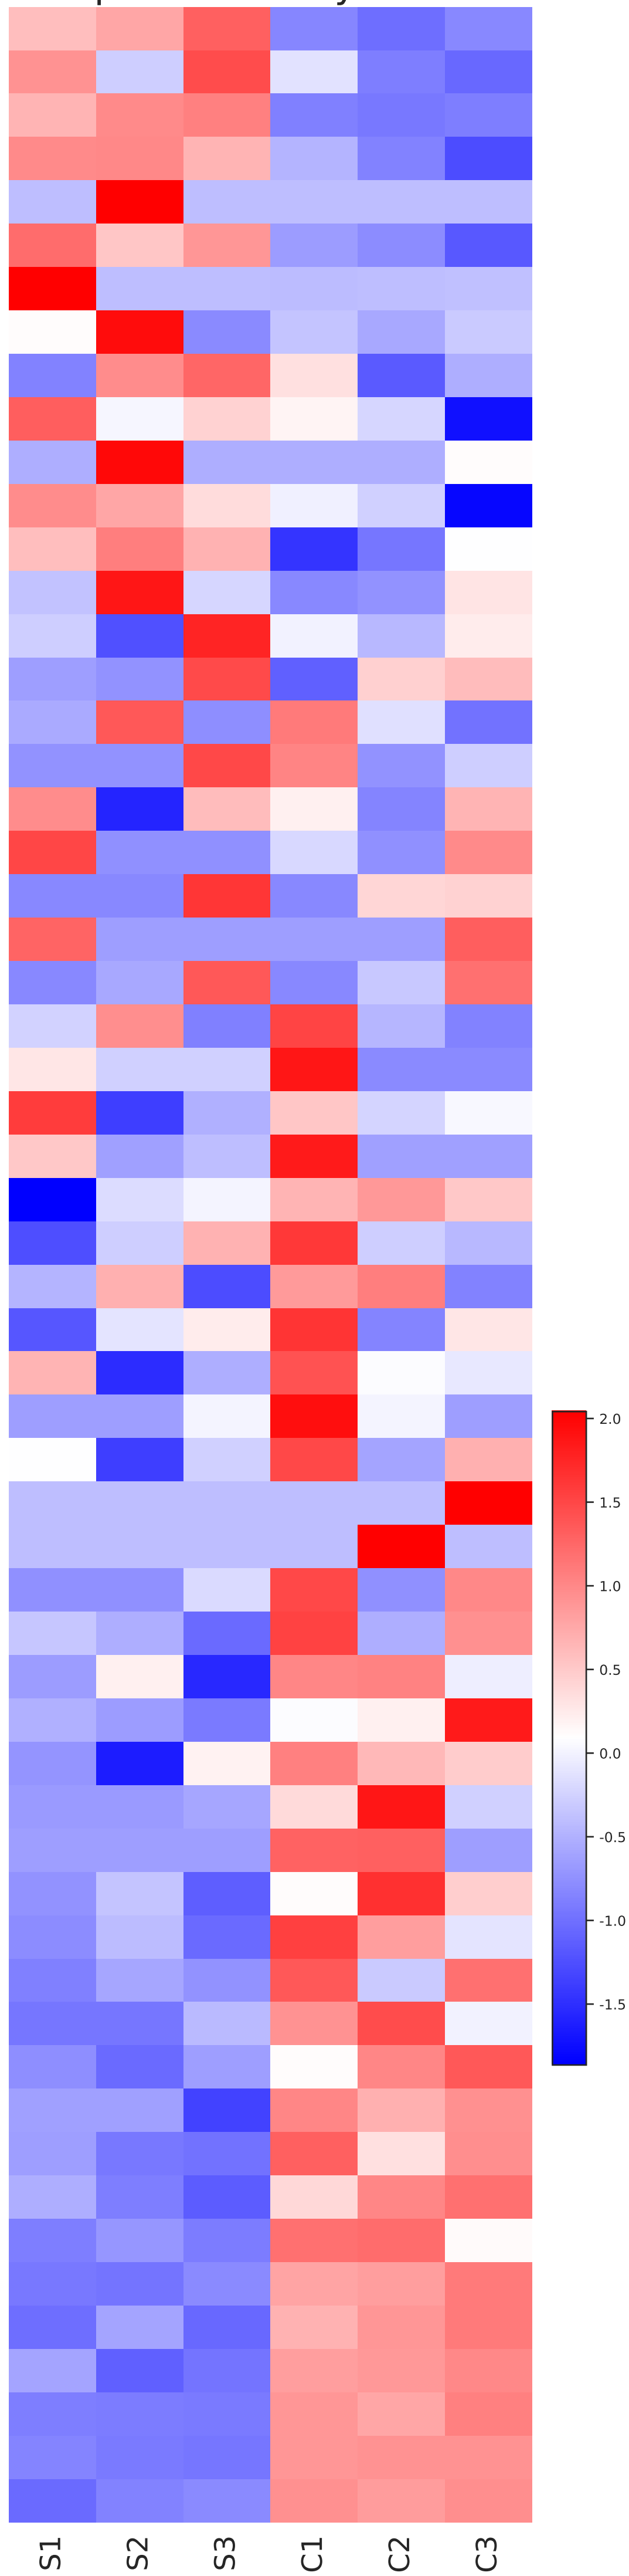

Supplement: Supplementary file 452 [file 1194_Activated PKN1 stimulates transcription of AR (androgen r...(R-HSA-5625886).heatmap.pdf › Source data/1.RNA-Seq source data/2.HUVECs/result/1.6.GSEA/S-vs-C/rct/1194_Activated PKN1 stimulates transcription of AR (androgen r...(R-HSA-5625886).heatmap.pdf]

**RUNX1 regulates genes involved in megakaryocyte different...(R-HSA-8936459)**

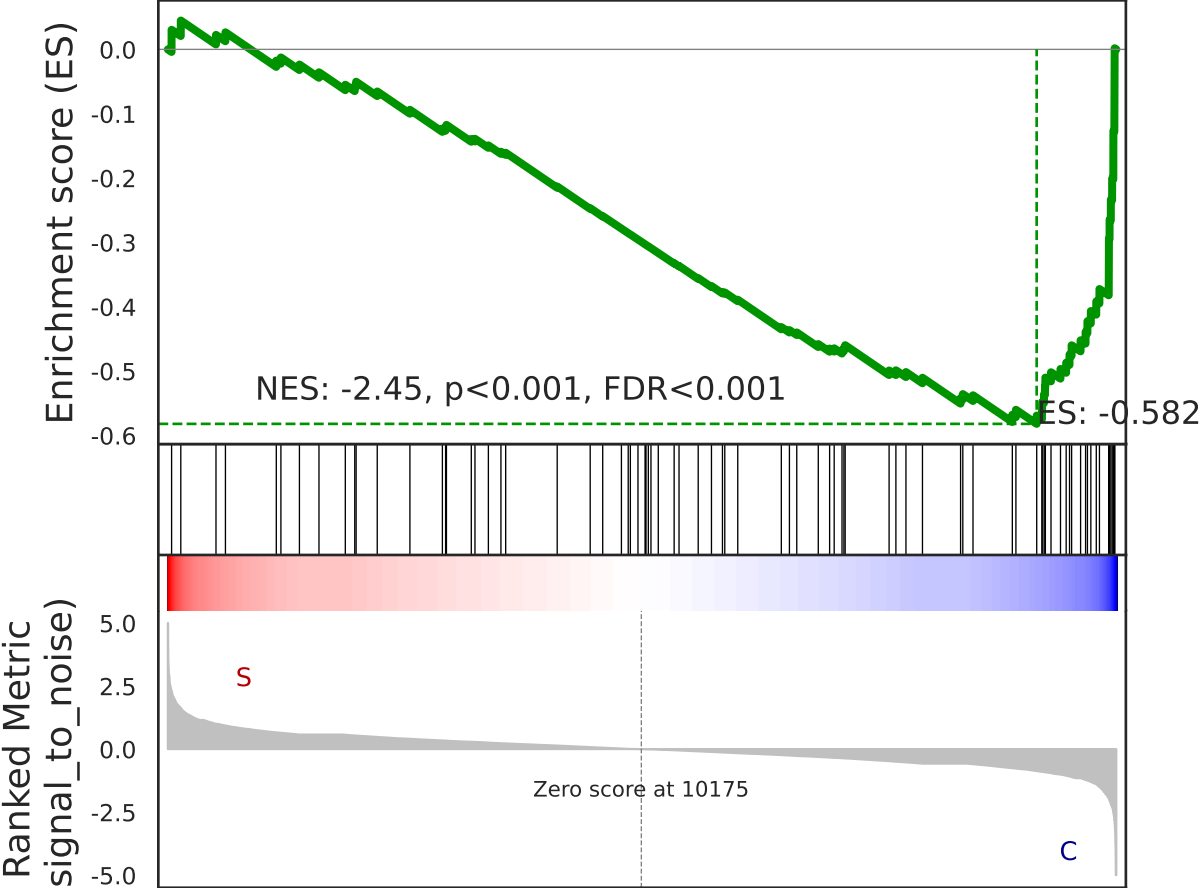

Supplement: Supplementary file 453 [file 1195_RUNX1 regulates genes involved in megakaryocyte different...(R-HSA-8936459).gsea.pdf › Source data/1.RNA-Seq source data/2.HUVECs/result/1.6.GSEA/S-vs-C/rct/1195_RUNX1 regulates genes involved in megakaryocyte different...(R-HSA-8936459).gsea.pdf]

# SIRT1 negatively regulates rRNA expression(R-HSA-427359)

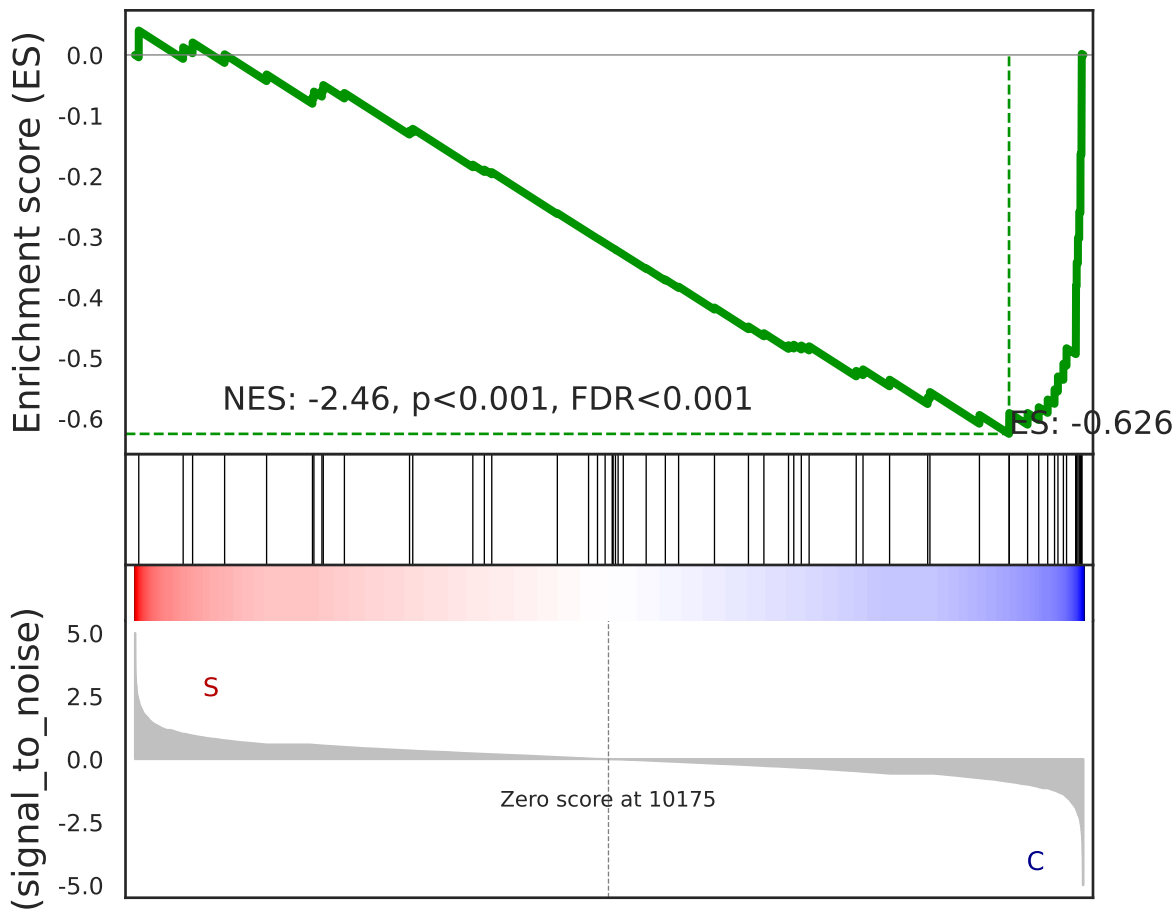

Supplement: Supplementary file 455 [file 1196_SIRT1 negatively regulates rRNA expression(R-HSA-427359).gsea.pdf › Source data/1.RNA-Seq source data/2.HUVECs/result/1.6.GSEA/S-vs-C/rct/1196_SIRT1 negatively regulates rRNA expression(R-HSA-427359).gsea.pdf]

SIRT1 negatively regulates rRNA expression(R-HSA-427359)  
Heatmap of the Analyzed GeneSet

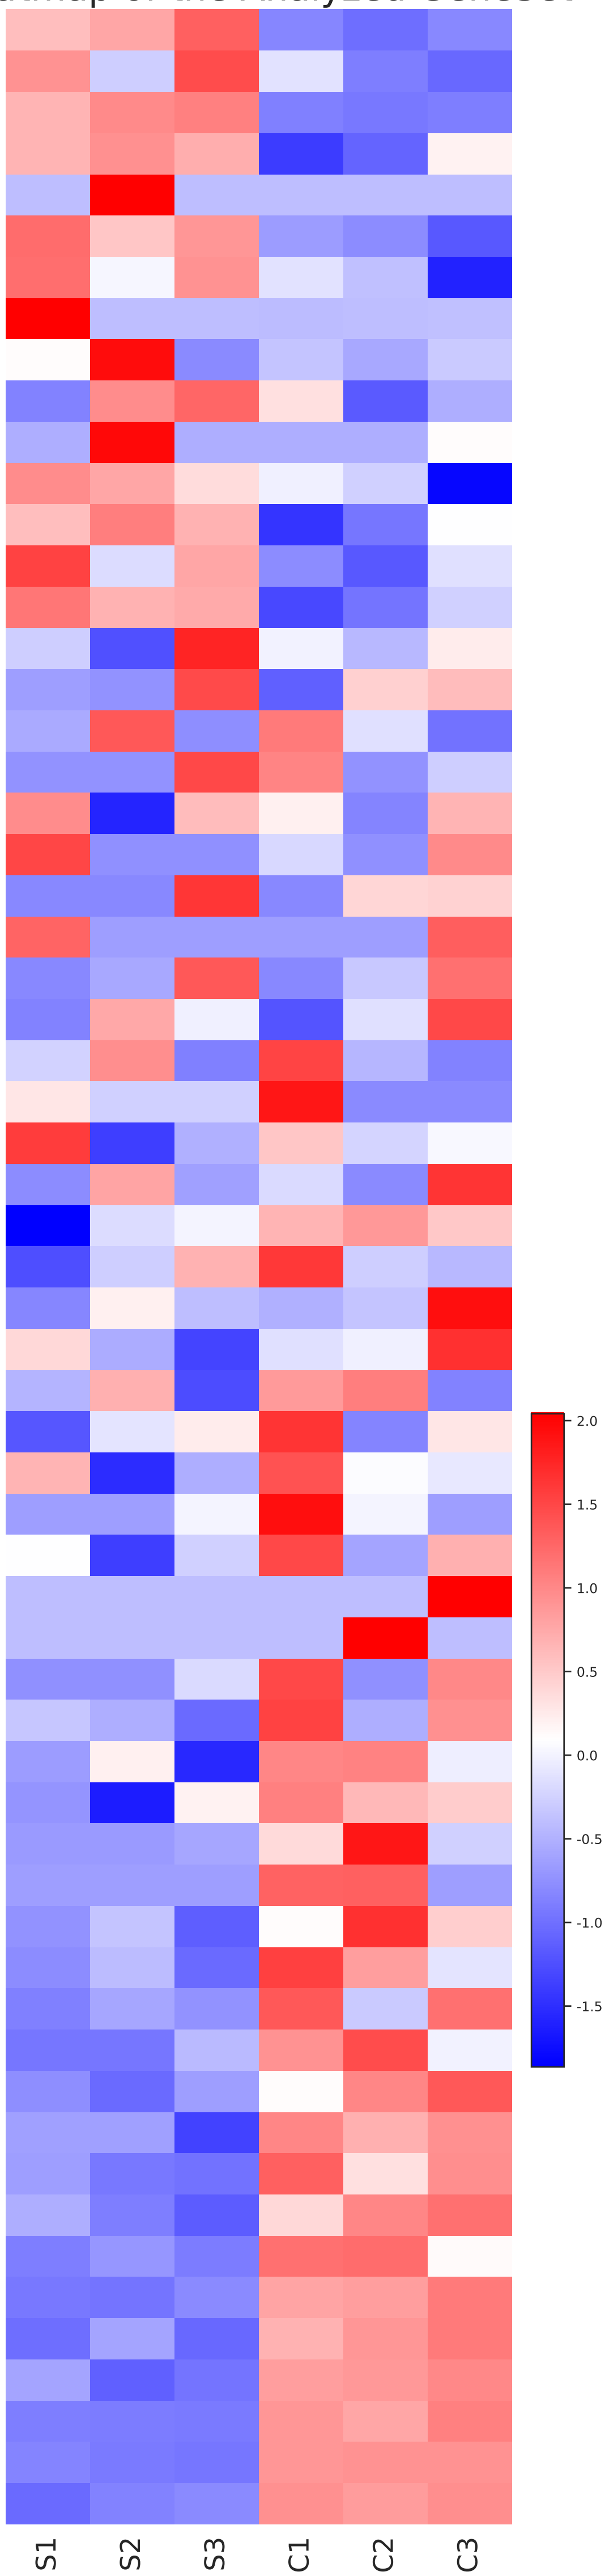

Supplement: Supplementary file 456 [file 1196_SIRT1 negatively regulates rRNA expression(R-HSA-427359).heatmap.pdf › Source data/1.RNA-Seq source data/2.HUVECs/result/1.6.GSEA/S-vs-C/rct/1196_SIRT1 negatively regulates rRNA expression(R-HSA-427359).heatmap.pdf]

# Estrogen-dependent gene expression(R-HSA-9018519)

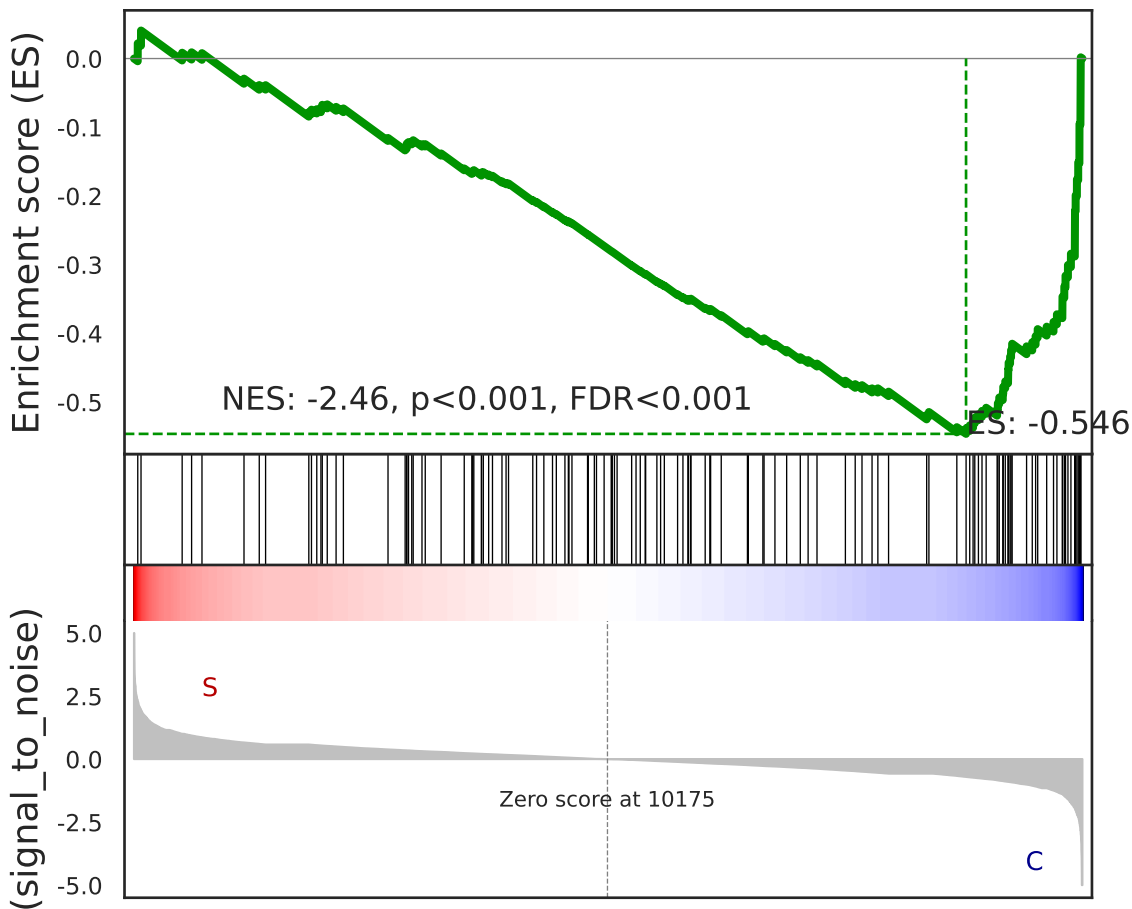

Supplement: Supplementary file 457 [file 1197_Estrogen-dependent gene expression(R-HSA-9018519).gsea.pdf › Source data/1.RNA-Seq source data/2.HUVECs/result/1.6.GSEA/S-vs-C/rct/1197_Estrogen-dependent gene expression(R-HSA-9018519).gsea.pdf]

# Estrogen-dependent gene expression(R-HSA-9018519)

## Heatmap of the Analyzed GeneSet

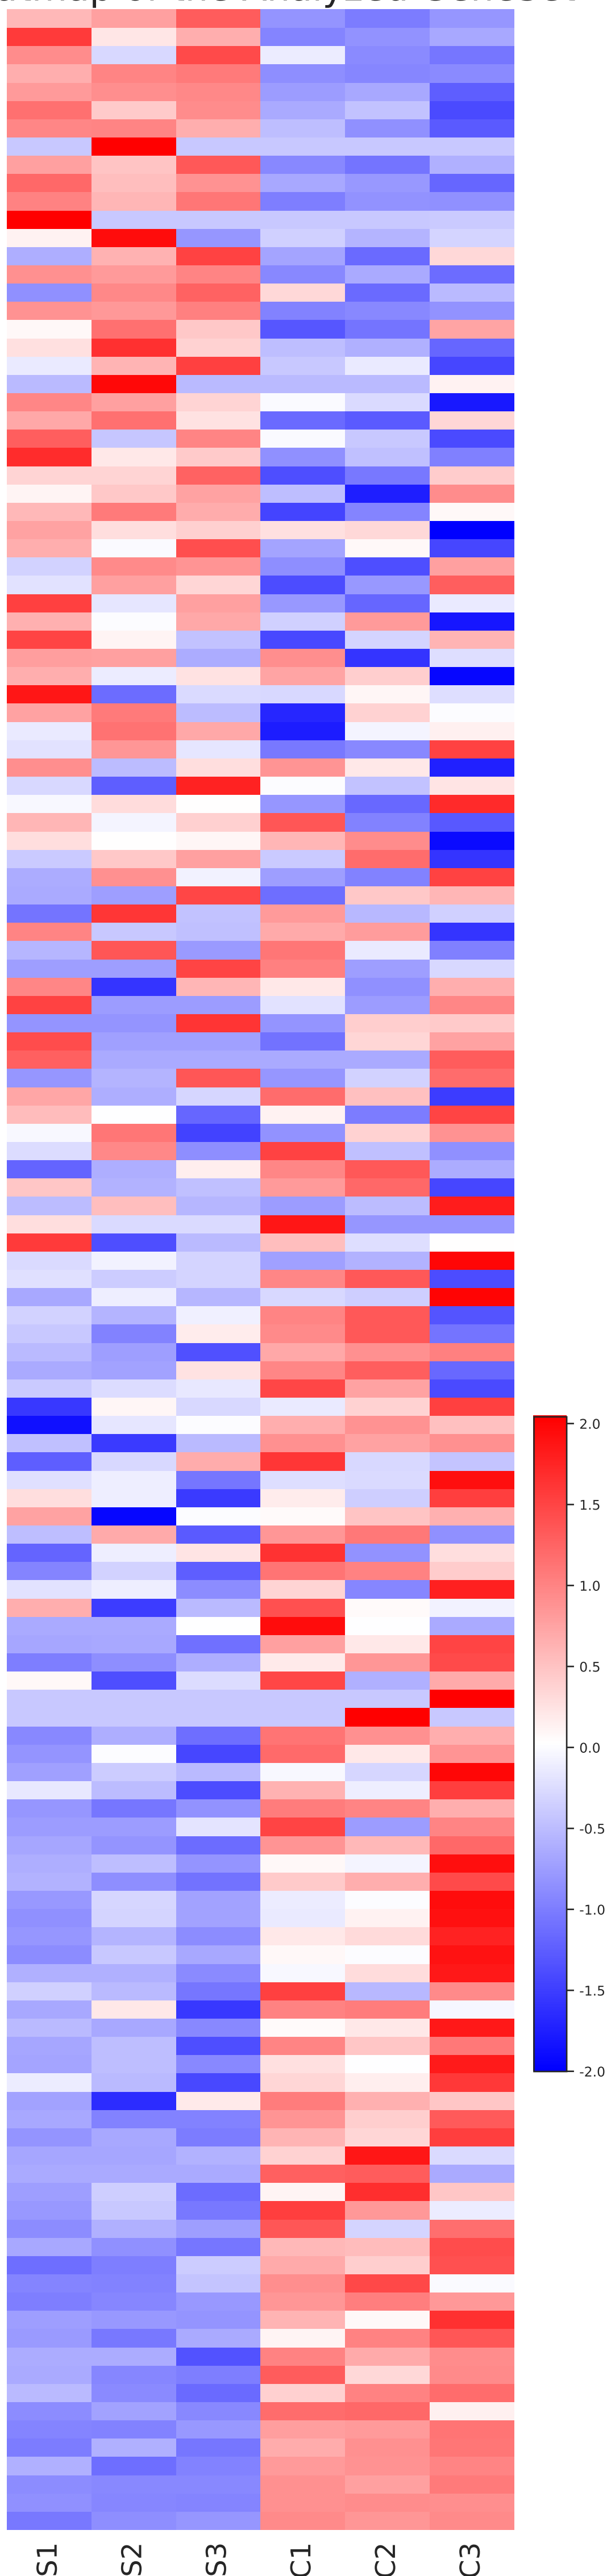

Supplement: Supplementary file 458 [file 1197_Estrogen-dependent gene expression(R-HSA-9018519).heatmap.pdf › Source data/1.RNA-Seq source data/2.HUVECs/result/1.6.GSEA/S-vs-C/rct/1197_Estrogen-dependent gene expression(R-HSA-9018519).heatmap.pdf]

# DNA methylation(R-HSA-5334118)

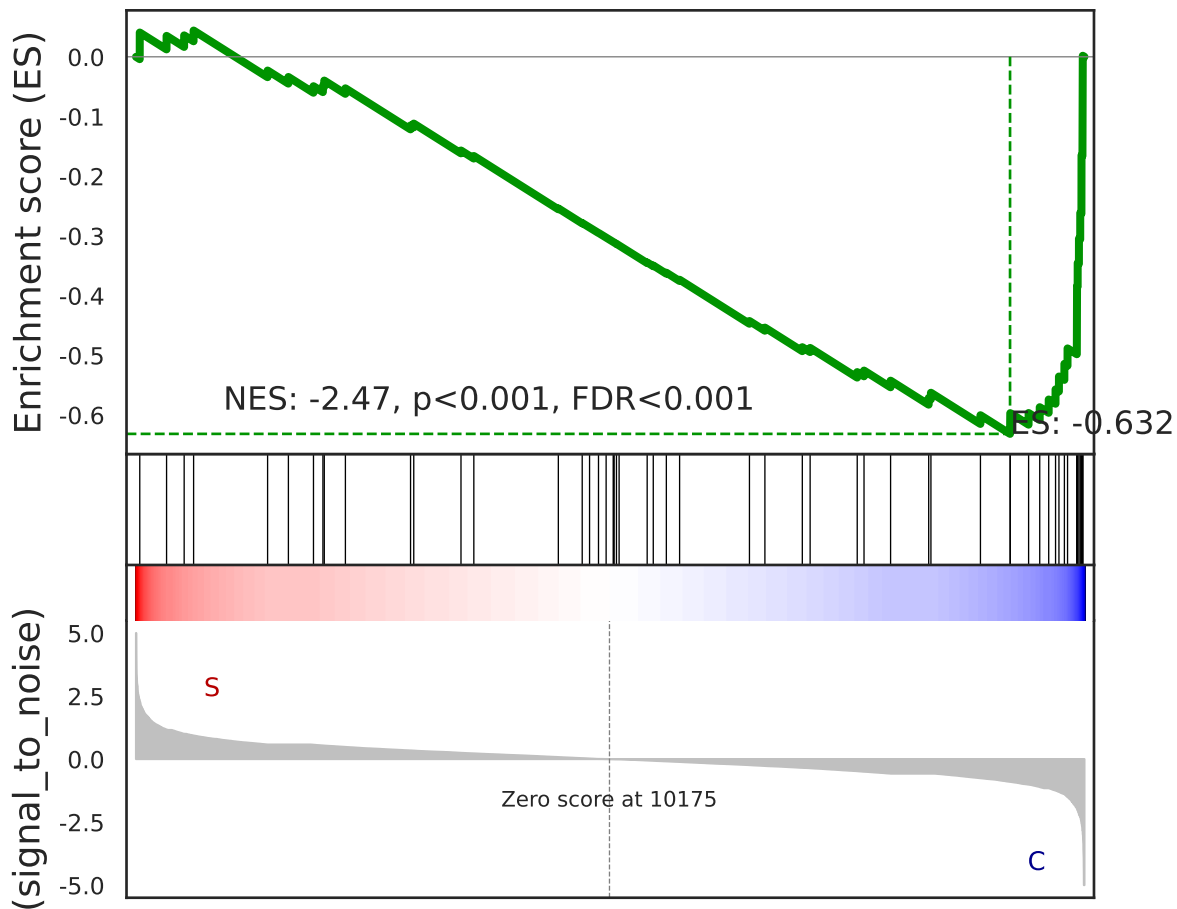

Supplement: Supplementary file 459 [file 1198_DNA methylation(R-HSA-5334118).gsea.pdf › Source data/1.RNA-Seq source data/2.HUVECs/result/1.6.GSEA/S-vs-C/rct/1198_DNA methylation(R-HSA-5334118).gsea.pdf]

DNA methylation(R-HSA-5334118)  
Heatmap of the Analyzed GeneSet

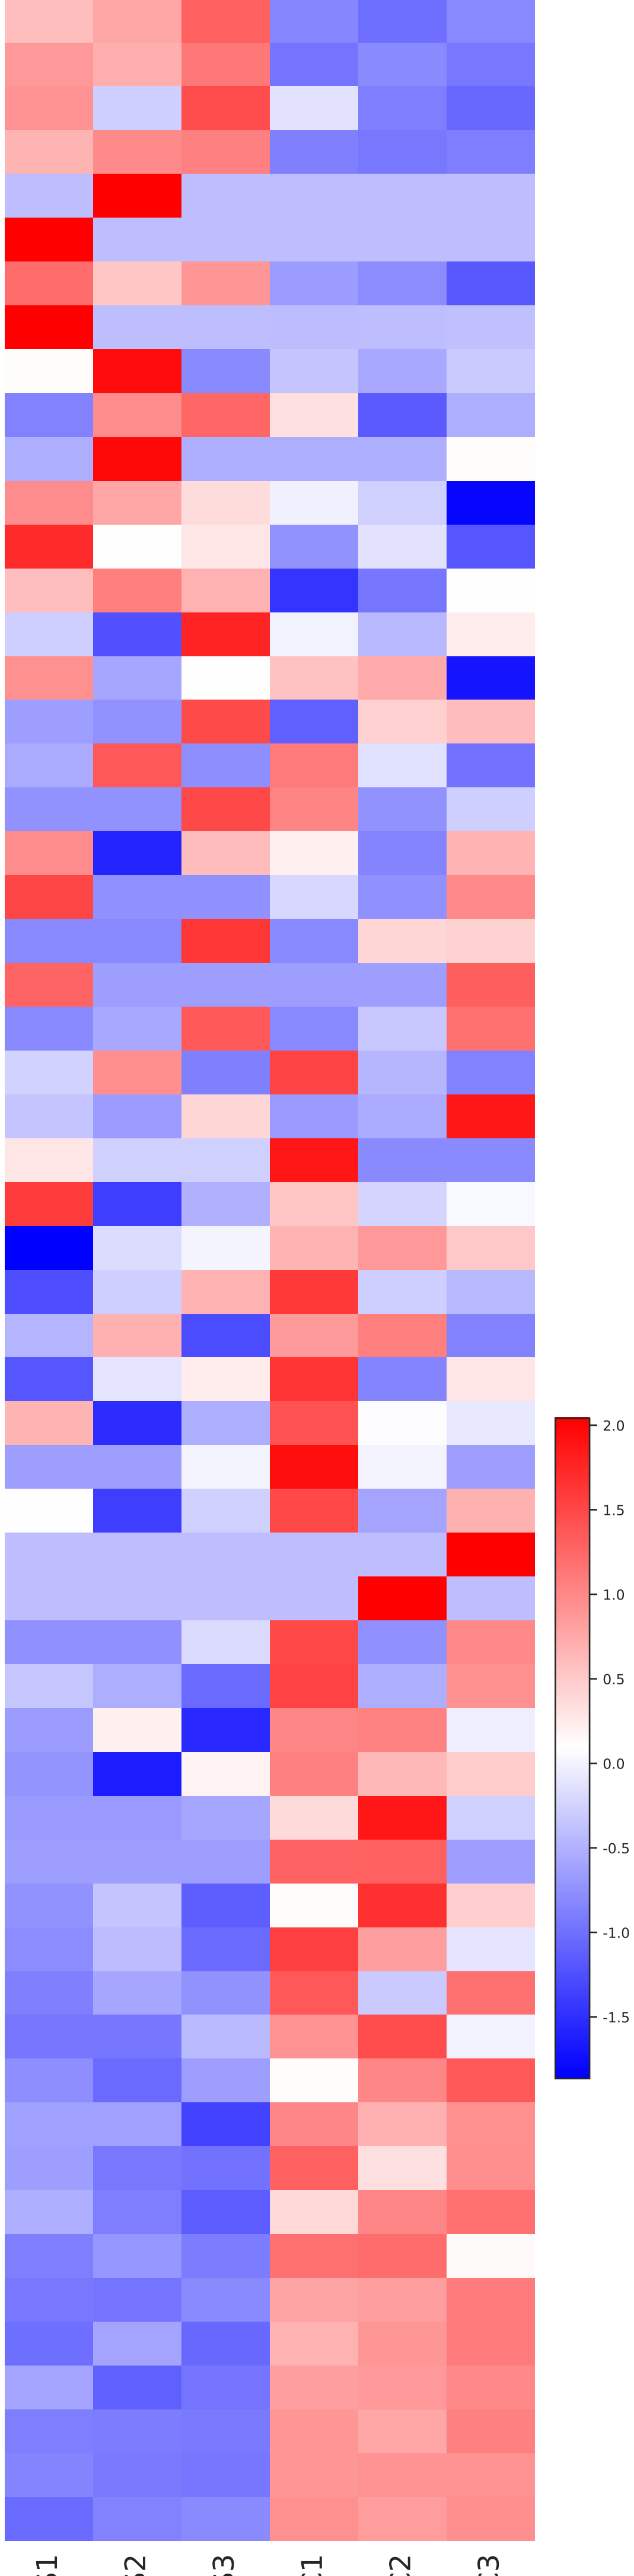

Supplement: Supplementary file 460 [file 1198_DNA methylation(R-HSA-5334118).heatmap.pdf › Source data/1.RNA-Seq source data/2.HUVECs/result/1.6.GSEA/S-vs-C/rct/1198_DNA methylation(R-HSA-5334118).heatmap.pdf]

# Packaging Of Telomere Ends(R-HSA-171306)

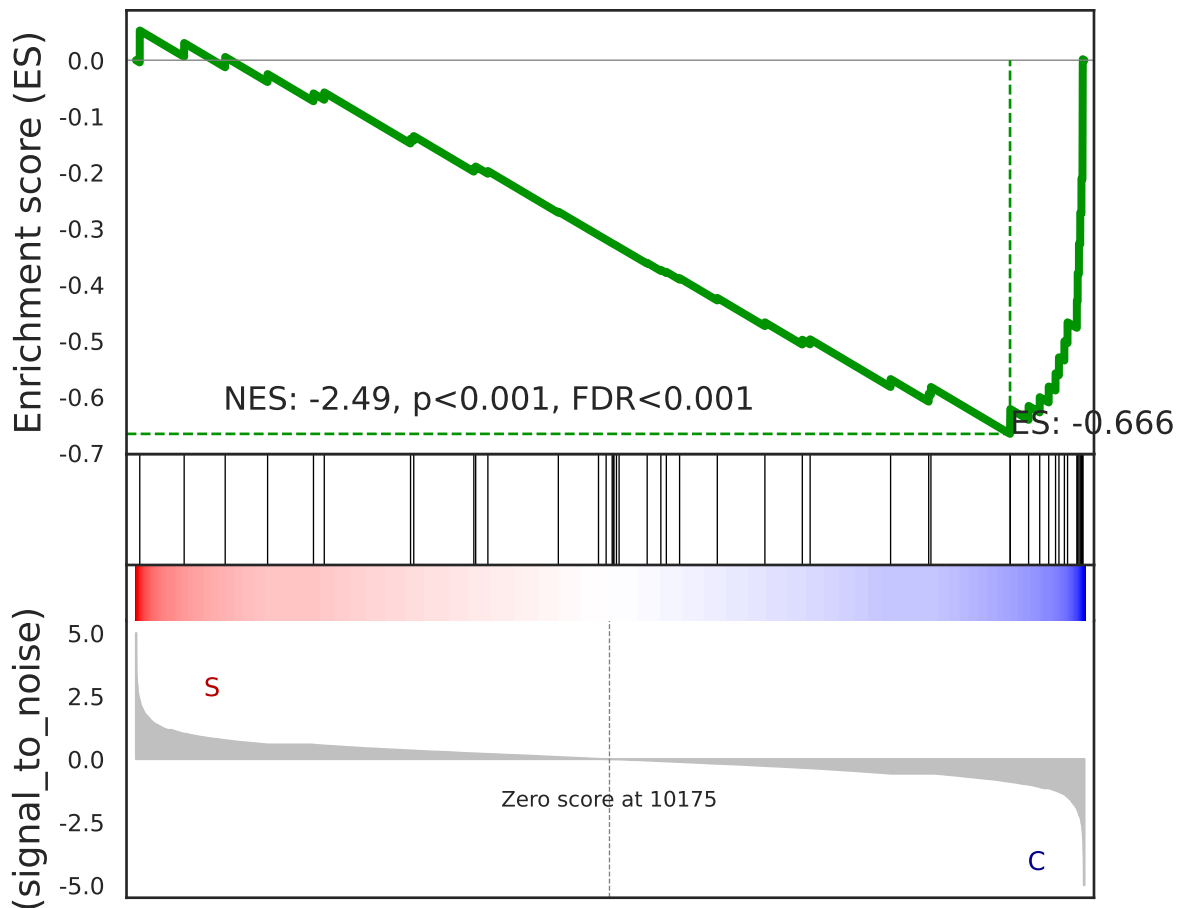

Supplement: Supplementary file 461 [file 1199_Packaging Of Telomere Ends(R-HSA-171306).gsea.pdf › Source data/1.RNA-Seq source data/2.HUVECs/result/1.6.GSEA/S-vs-C/rct/1199_Packaging Of Telomere Ends(R-HSA-171306).gsea.pdf]

Packaging Of Telomere Ends(R-HSA-171306)  
Heatmap of the Analyzed GeneSet

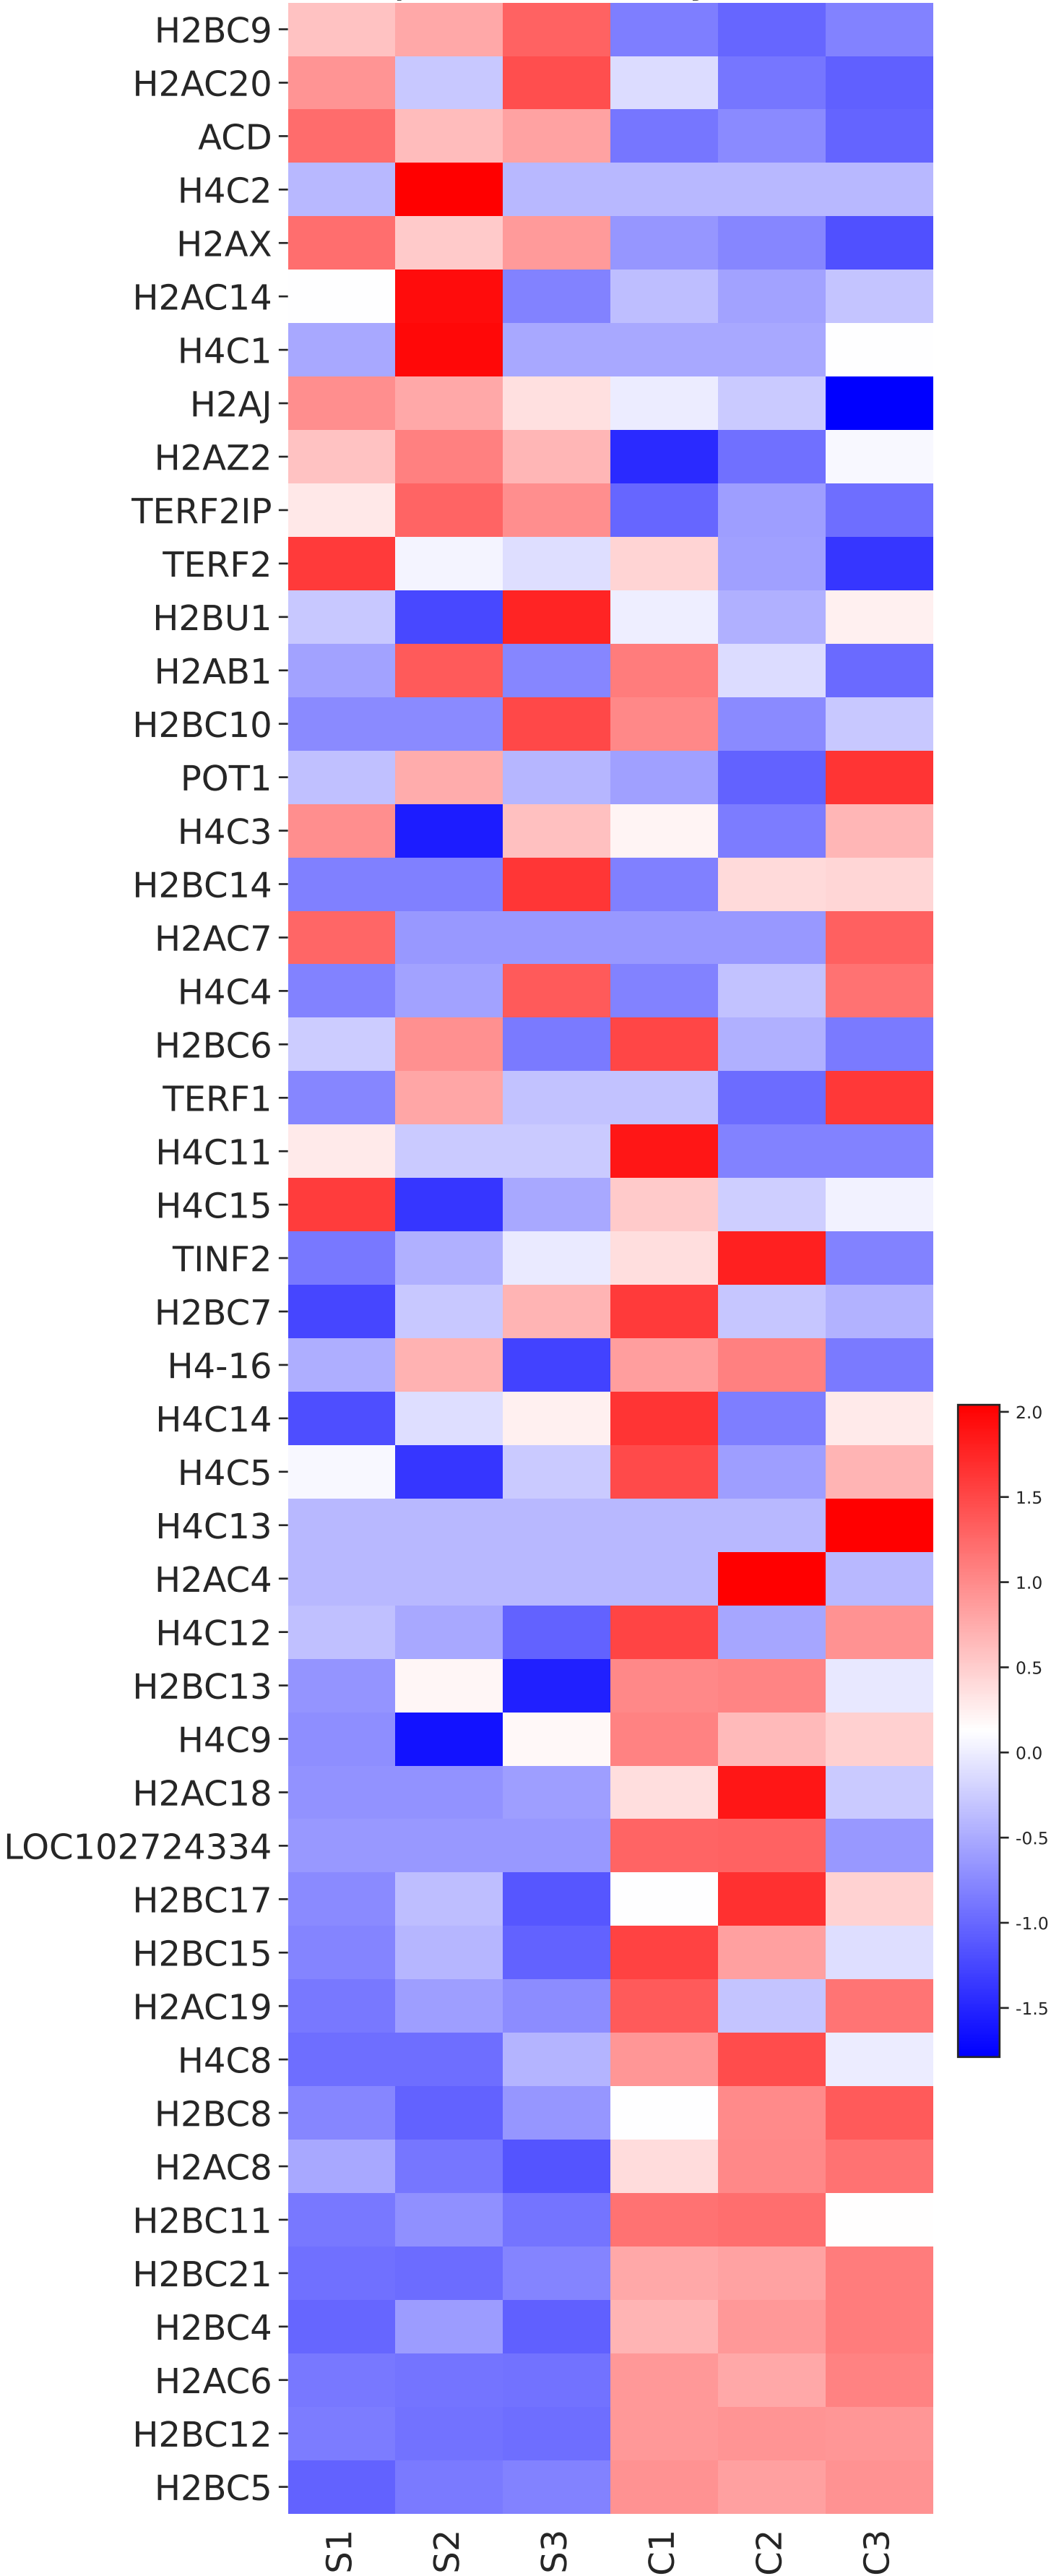

Supplement: Supplementary file 462 [file 1199_Packaging Of Telomere Ends(R-HSA-171306).heatmap.pdf › Source data/1.RNA-Seq source data/2.HUVECs/result/1.6.GSEA/S-vs-C/rct/1199_Packaging Of Telomere Ends(R-HSA-171306).heatmap.pdf]

Response of EIF2AK4 (GCN2) to amino acid deficiency(R-HSA-9633012)

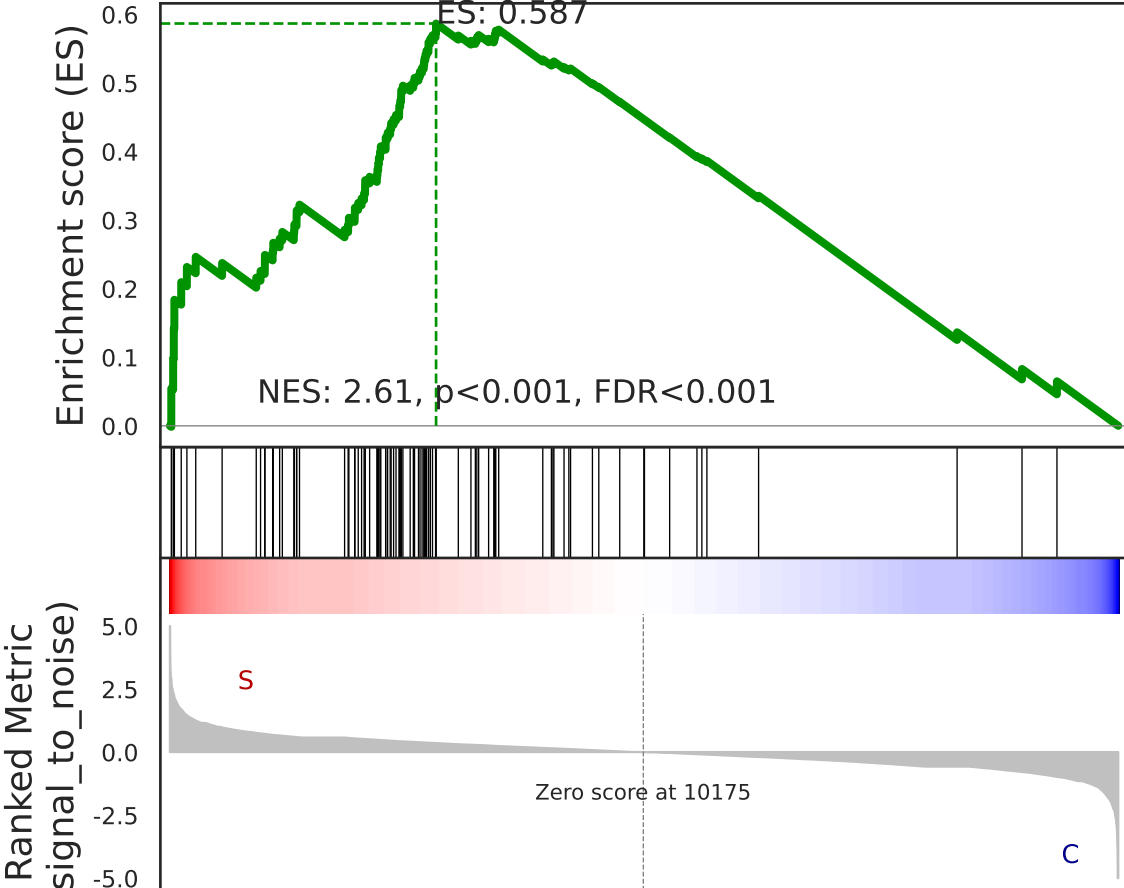

Supplement: Supplementary file 463 [file 1_Response of EIF2AK4 (GCN2) to amino acid deficiency(R-HSA-9633012).gsea.pdf › Source data/1.RNA-Seq source data/2.HUVECs/result/1.6.GSEA/S-vs-C/rct/1_Response of EIF2AK4 (GCN2) to amino acid deficiency(R-HSA-9633012).gsea.pdf]

Response of EIF2AK4 (GCN2) to amino acid deficiency(R-HSA-9633012)  
Heatmap of the Analyzed GeneSet

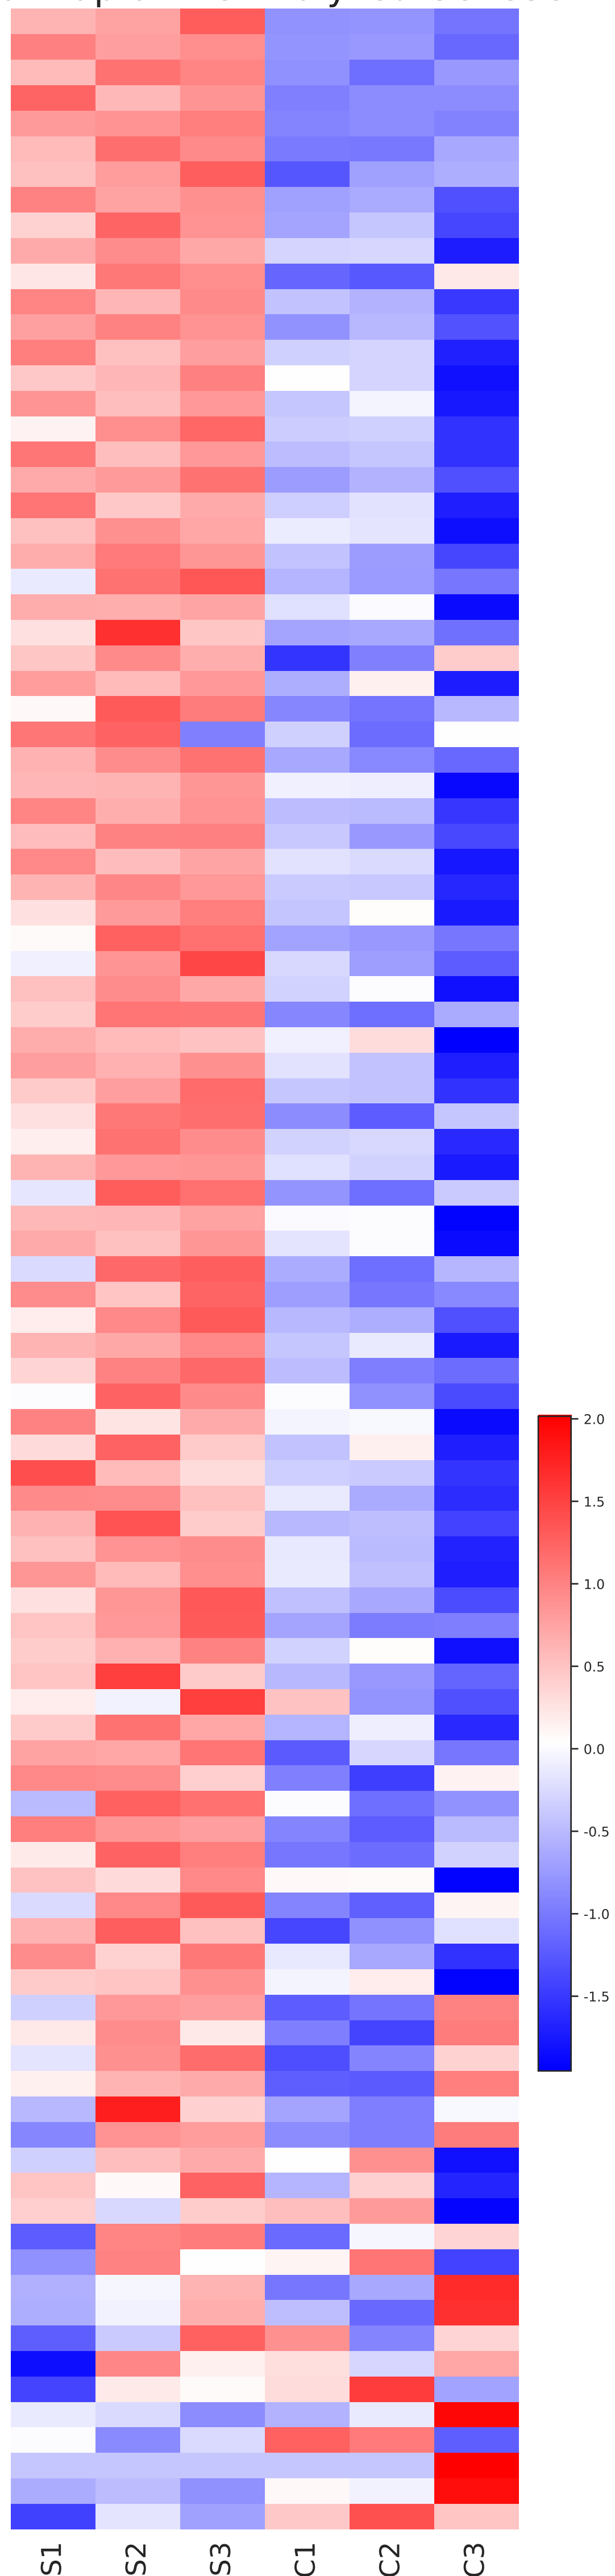

Supplement: Supplementary file 464 [file 1_Response of EIF2AK4 (GCN2) to amino acid deficiency(R-HSA-9633012).heatmap.pdf › Source data/1.RNA-Seq source data/2.HUVECs/result/1.6.GSEA/S-vs-C/rct/1_Response of EIF2AK4 (GCN2) to amino acid deficiency(R-HSA-9633012).heatmap.pdf]

# Peptide chain elongation(R-HSA-156902)

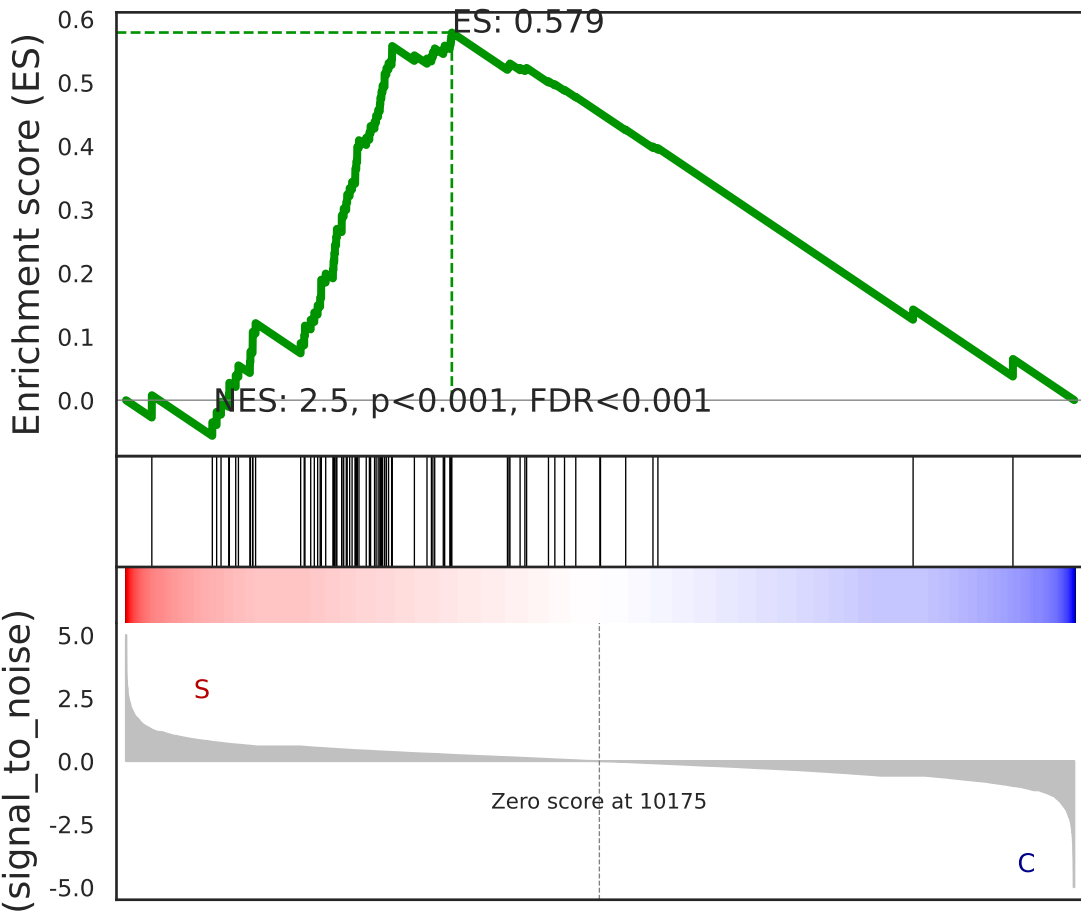

Supplement: Supplementary file 465 [file 2_Peptide chain elongation(R-HSA-156902).gsea.pdf › Source data/1.RNA-Seq source data/2.HUVECs/result/1.6.GSEA/S-vs-C/rct/2_Peptide chain elongation(R-HSA-156902).gsea.pdf]

Peptide chain elongation(R-HSA-156902)  
Heatmap of the Analyzed GeneSet

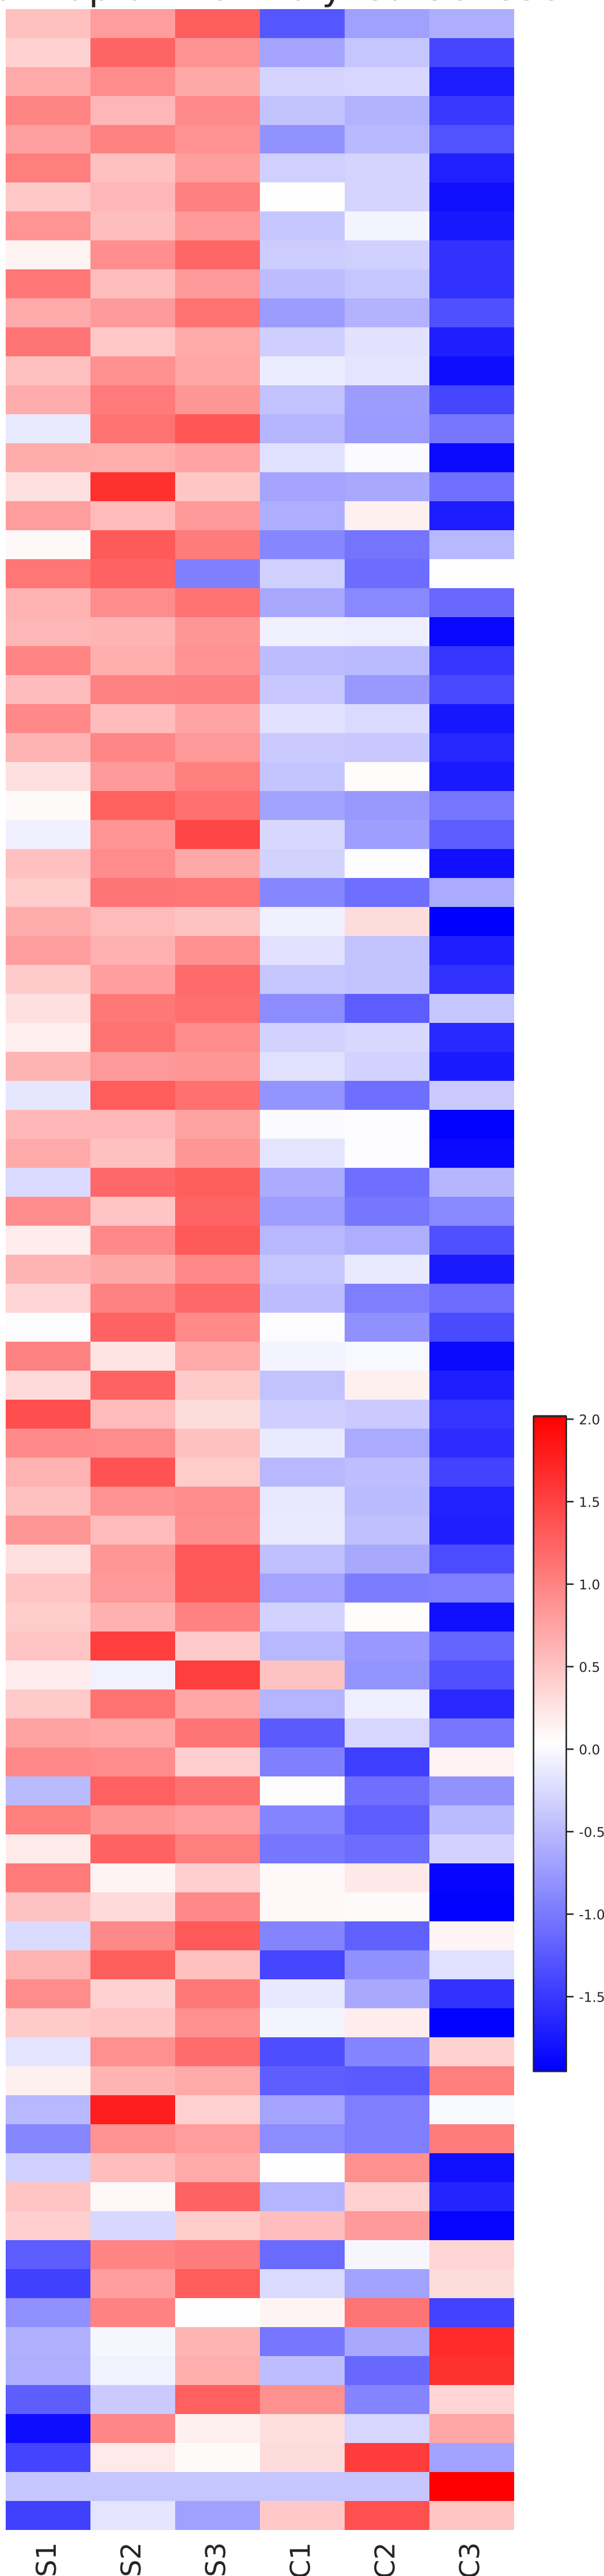

Supplement: Supplementary file 466 [file 2_Peptide chain elongation(R-HSA-156902).heatmap.pdf › Source data/1.RNA-Seq source data/2.HUVECs/result/1.6.GSEA/S-vs-C/rct/2_Peptide chain elongation(R-HSA-156902).heatmap.pdf]

# Eukaryotic Translation Elongation(R-HSA-156842)

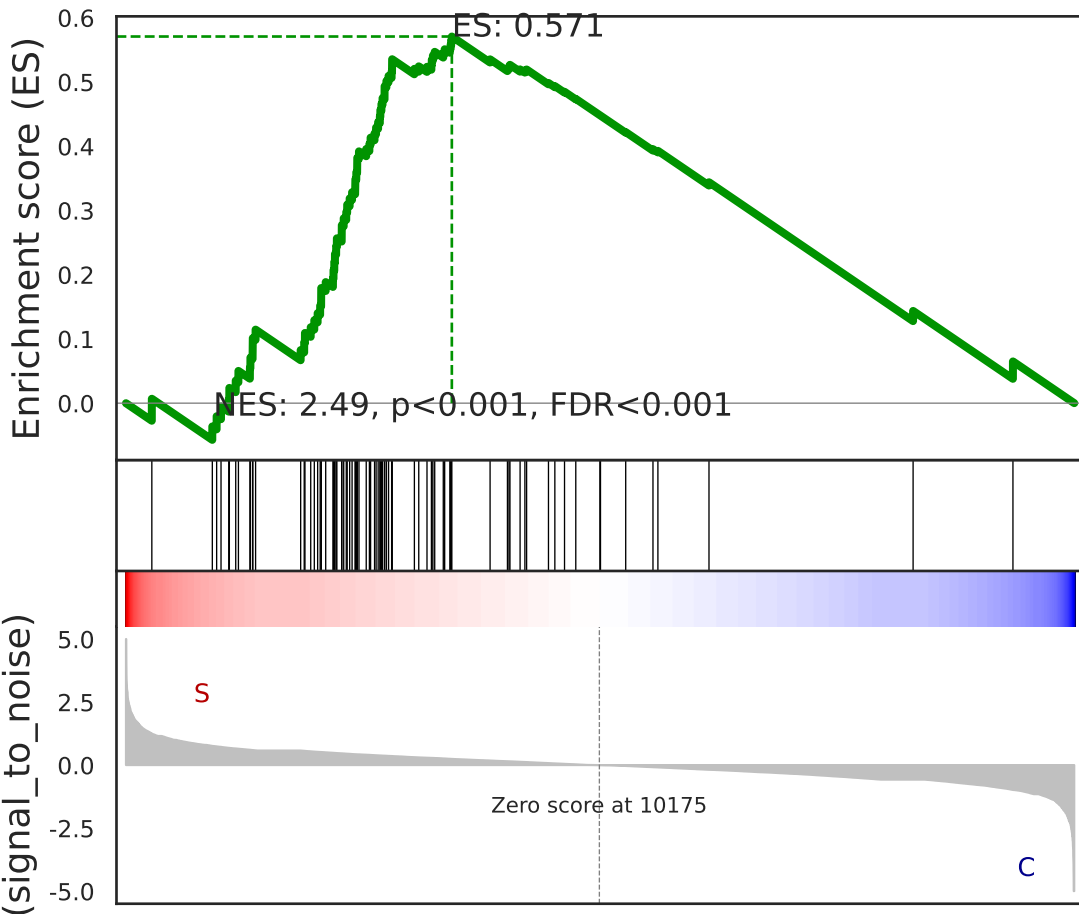

Supplement: Supplementary file 467 [file 3_Eukaryotic Translation Elongation(R-HSA-156842).gsea.pdf › Source data/1.RNA-Seq source data/2.HUVECs/result/1.6.GSEA/S-vs-C/rct/3_Eukaryotic Translation Elongation(R-HSA-156842).gsea.pdf]

Eukaryotic Translation Elongation(R-HSA-156842)  
Heatmap of the Analyzed GeneSet

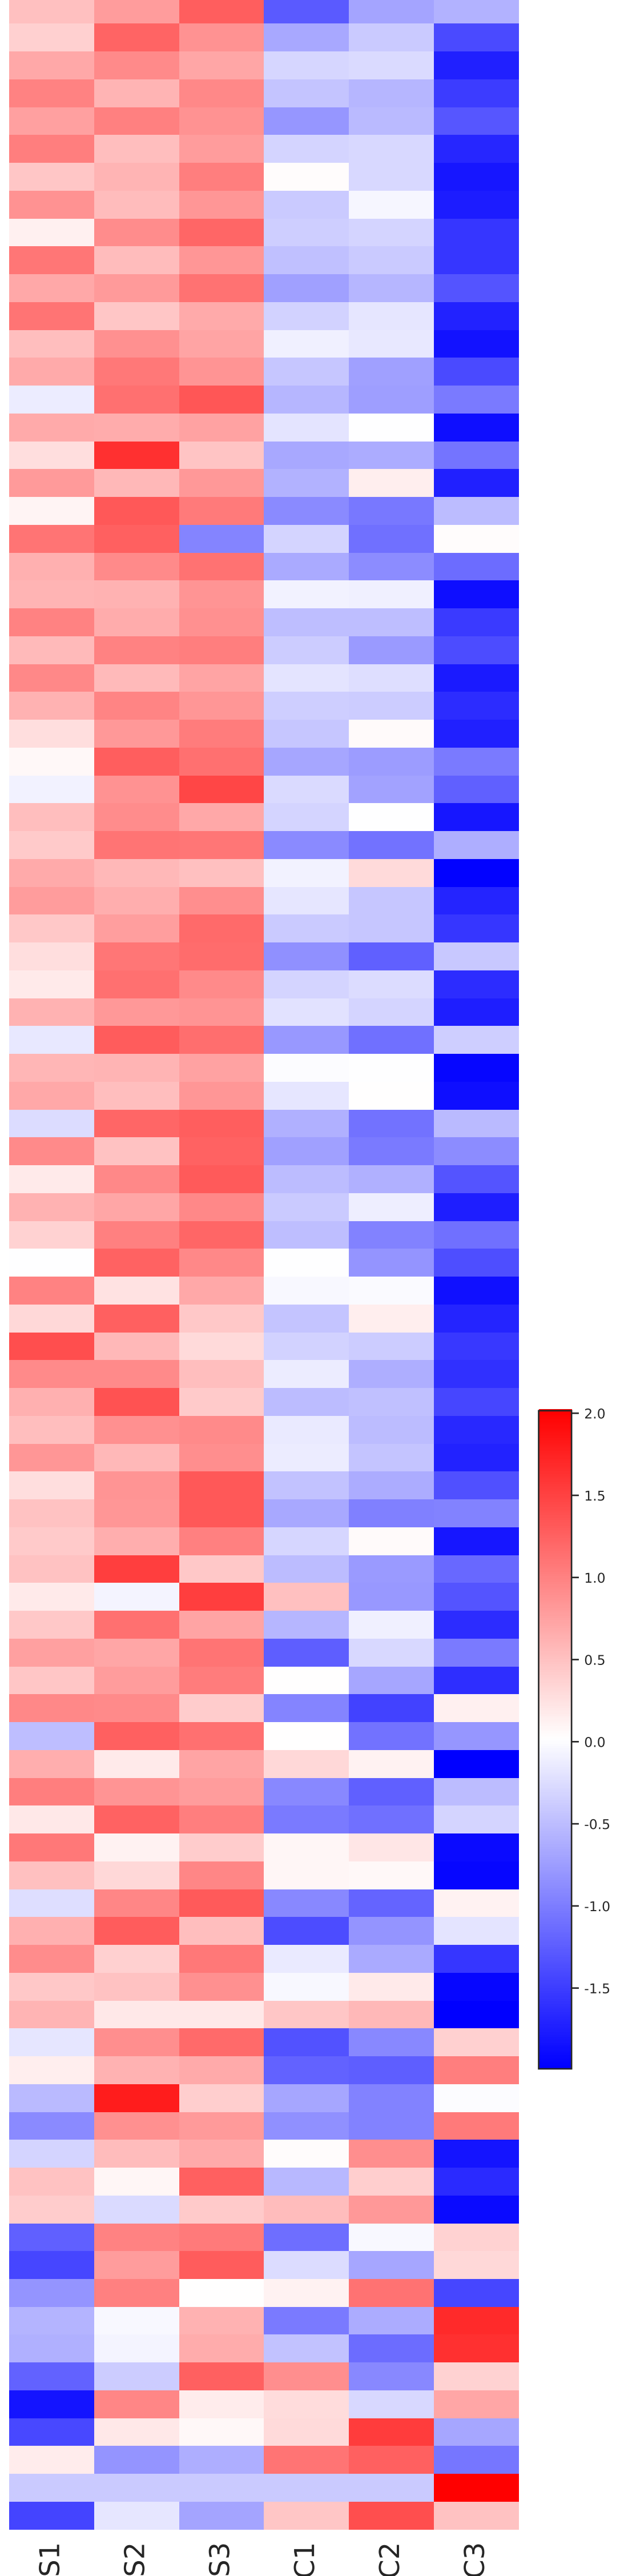

Supplement: Supplementary file 468 [file 3_Eukaryotic Translation Elongation(R-HSA-156842).heatmap.pdf › Source data/1.RNA-Seq source data/2.HUVECs/result/1.6.GSEA/S-vs-C/rct/3_Eukaryotic Translation Elongation(R-HSA-156842).heatmap.pdf]

# Viral mRNA Translation(R-HSA-192823)

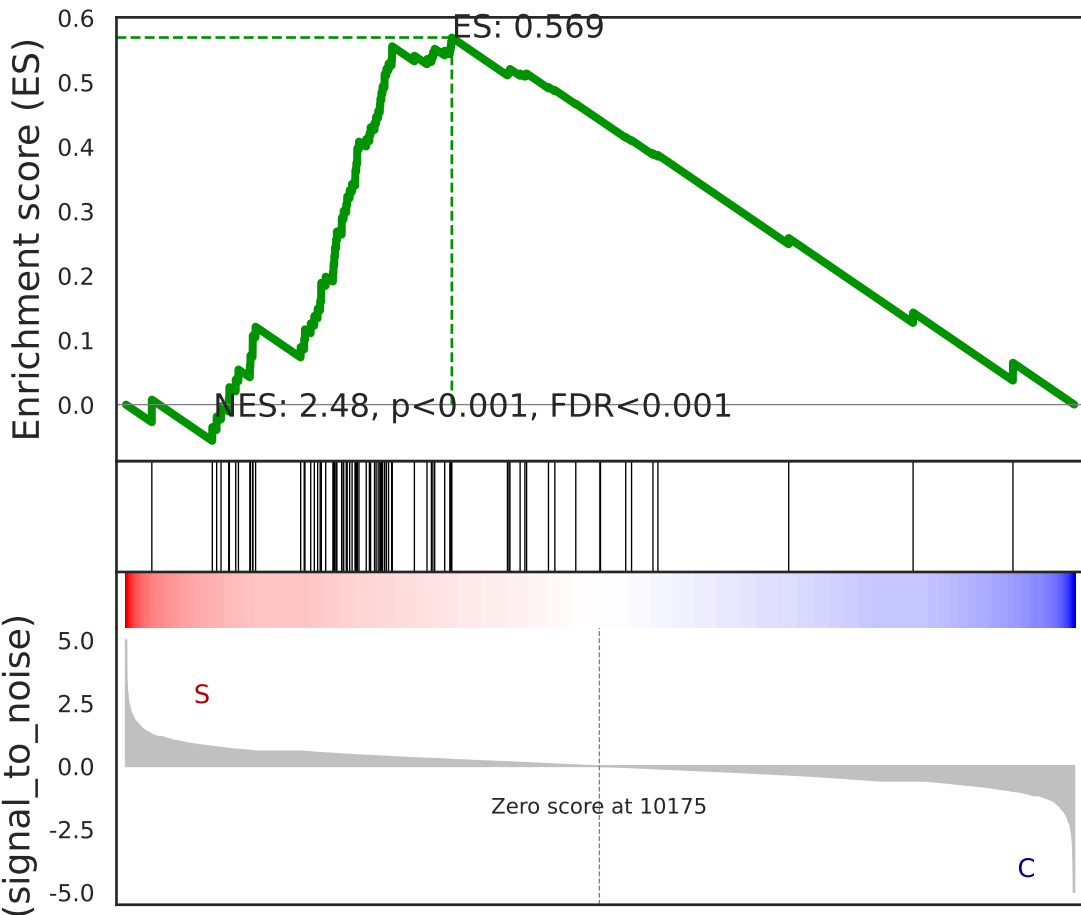

Supplement: Supplementary file 469 [file 4_Viral mRNA Translation(R-HSA-192823).gsea.pdf › Source data/1.RNA-Seq source data/2.HUVECs/result/1.6.GSEA/S-vs-C/rct/4_Viral mRNA Translation(R-HSA-192823).gsea.pdf]

Viral mRNA Translation(R-HSA-192823)  
Heatmap of the Analyzed GeneSet

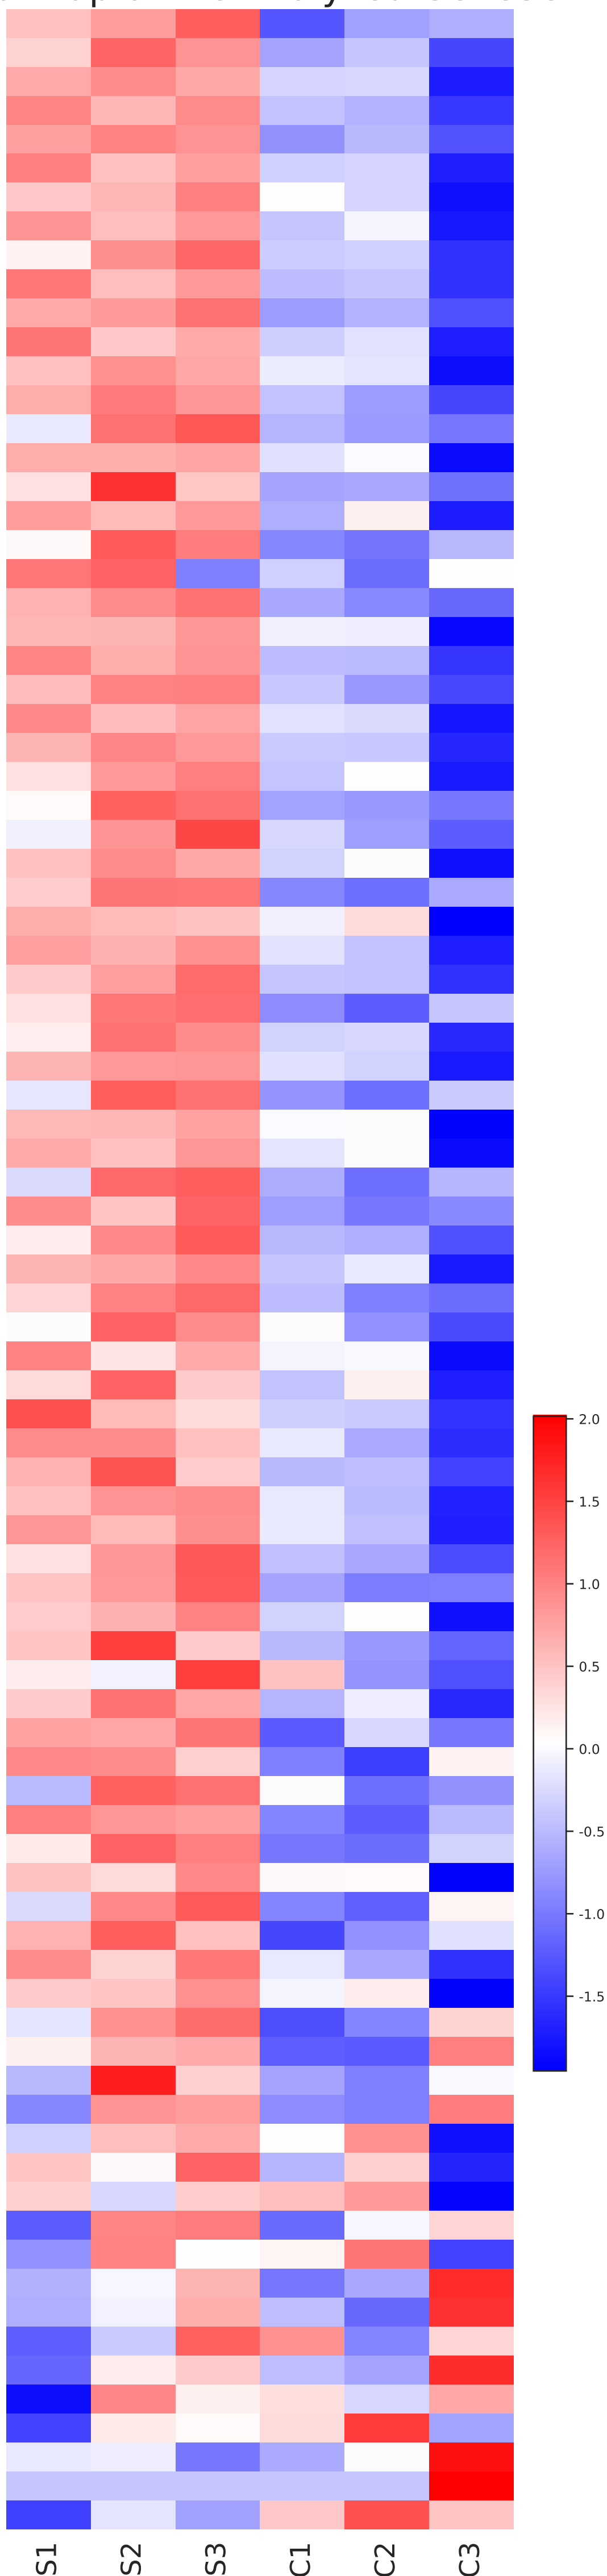

Supplement: Supplementary file 470 [file 4_Viral mRNA Translation(R-HSA-192823).heatmap.pdf › Source data/1.RNA-Seq source data/2.HUVECs/result/1.6.GSEA/S-vs-C/rct/4_Viral mRNA Translation(R-HSA-192823).heatmap.pdf]

# Selenocysteine synthesis(R-HSA-2408557)

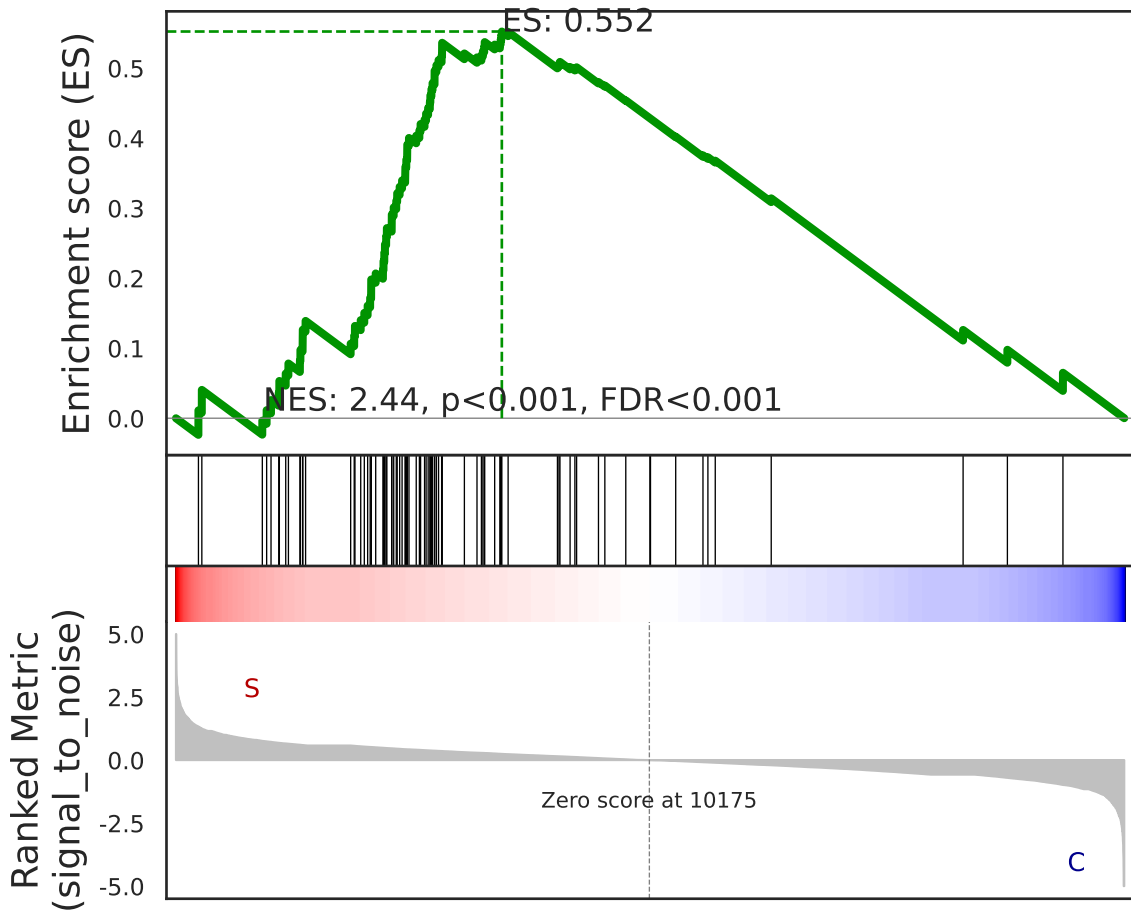

Supplement: Supplementary file 471 [file 5_Selenocysteine synthesis(R-HSA-2408557).gsea.pdf › Source data/1.RNA-Seq source data/2.HUVECs/result/1.6.GSEA/S-vs-C/rct/5_Selenocysteine synthesis(R-HSA-2408557).gsea.pdf]

Selenocysteine synthesis(R-HSA-2408557)  
Heatmap of the Analyzed GeneSet

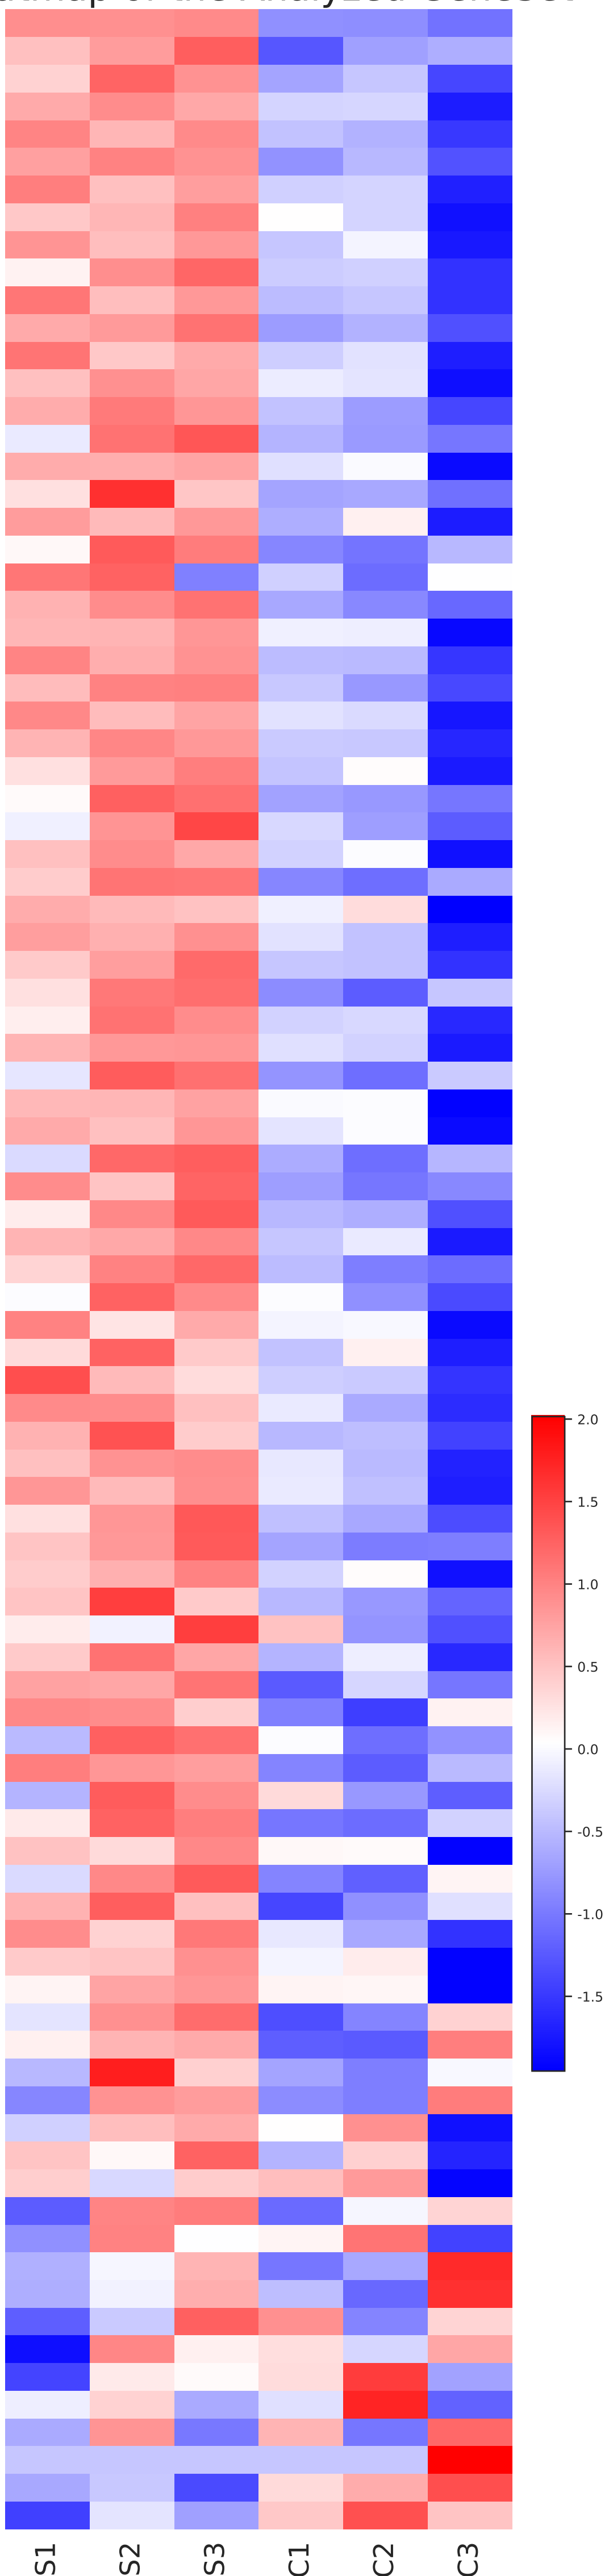

Supplement: Supplementary file 472 [file 5_Selenocysteine synthesis(R-HSA-2408557).heatmap.pdf › Source data/1.RNA-Seq source data/2.HUVECs/result/1.6.GSEA/S-vs-C/rct/5_Selenocysteine synthesis(R-HSA-2408557).heatmap.pdf]

SRP-dependent cotranslational protein targeting to membrane(R-HSA-1799339)

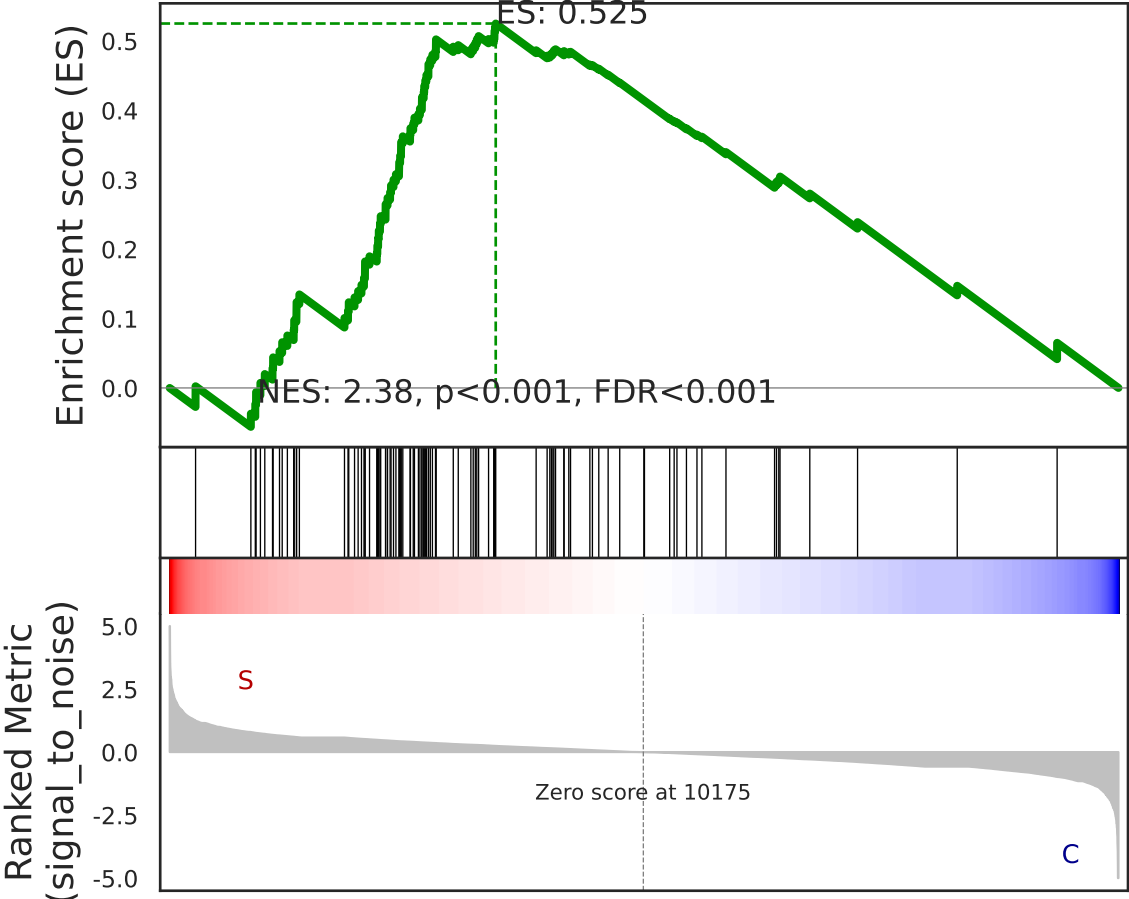

Supplement: Supplementary file 473 [file 6_SRP-dependent cotranslational protein targeting to membrane(R-HSA-1799339).gsea.pdf › Source data/1.RNA-Seq source data/2.HUVECs/result/1.6.GSEA/S-vs-C/rct/6_SRP-dependent cotranslational protein targeting to membrane(R-HSA-1799339).gsea.pdf]

# Eukaryotic Translation Termination(R-HSA-72764)

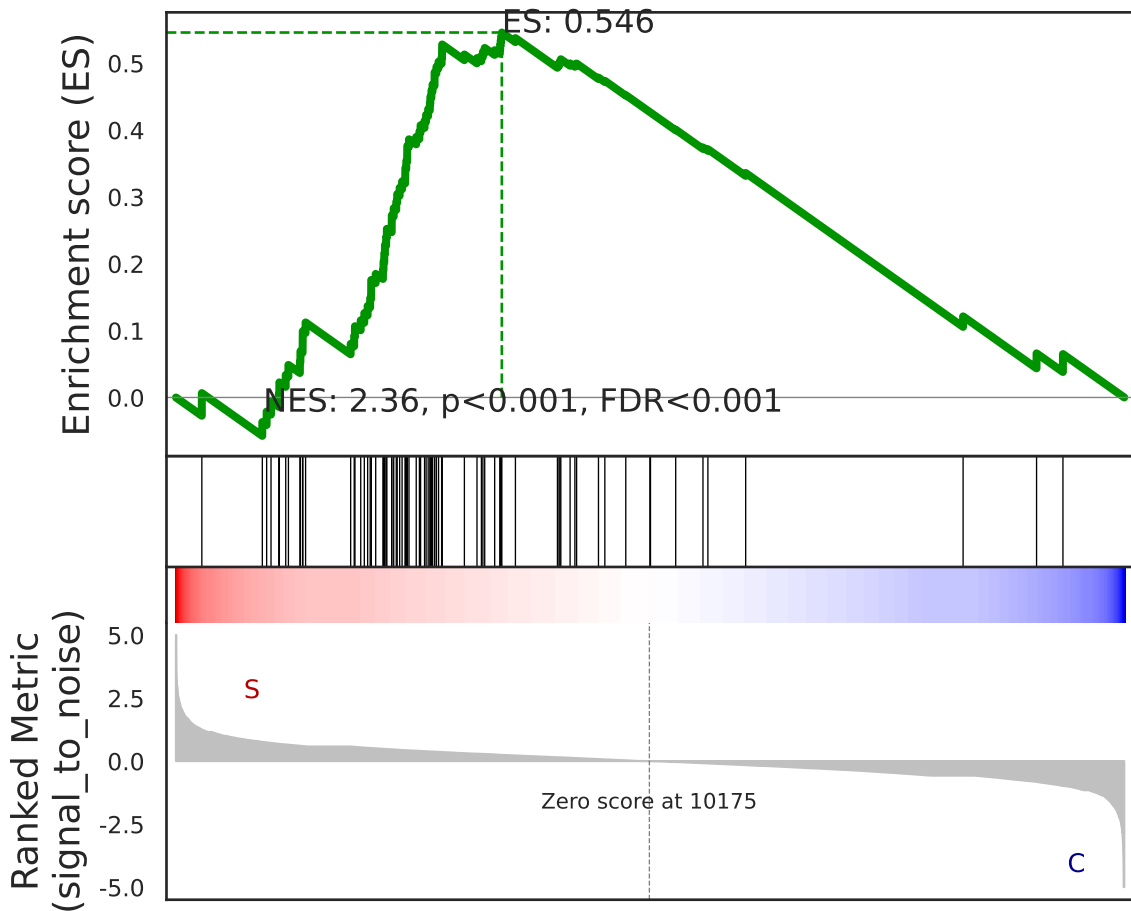

Supplement: Supplementary file 475 [file 7_Eukaryotic Translation Termination(R-HSA-72764).gsea.pdf › Source data/1.RNA-Seq source data/2.HUVECs/result/1.6.GSEA/S-vs-C/rct/7_Eukaryotic Translation Termination(R-HSA-72764).gsea.pdf]

Eukaryotic Translation Termination(R-HSA-72764)  
Heatmap of the Analyzed GeneSet

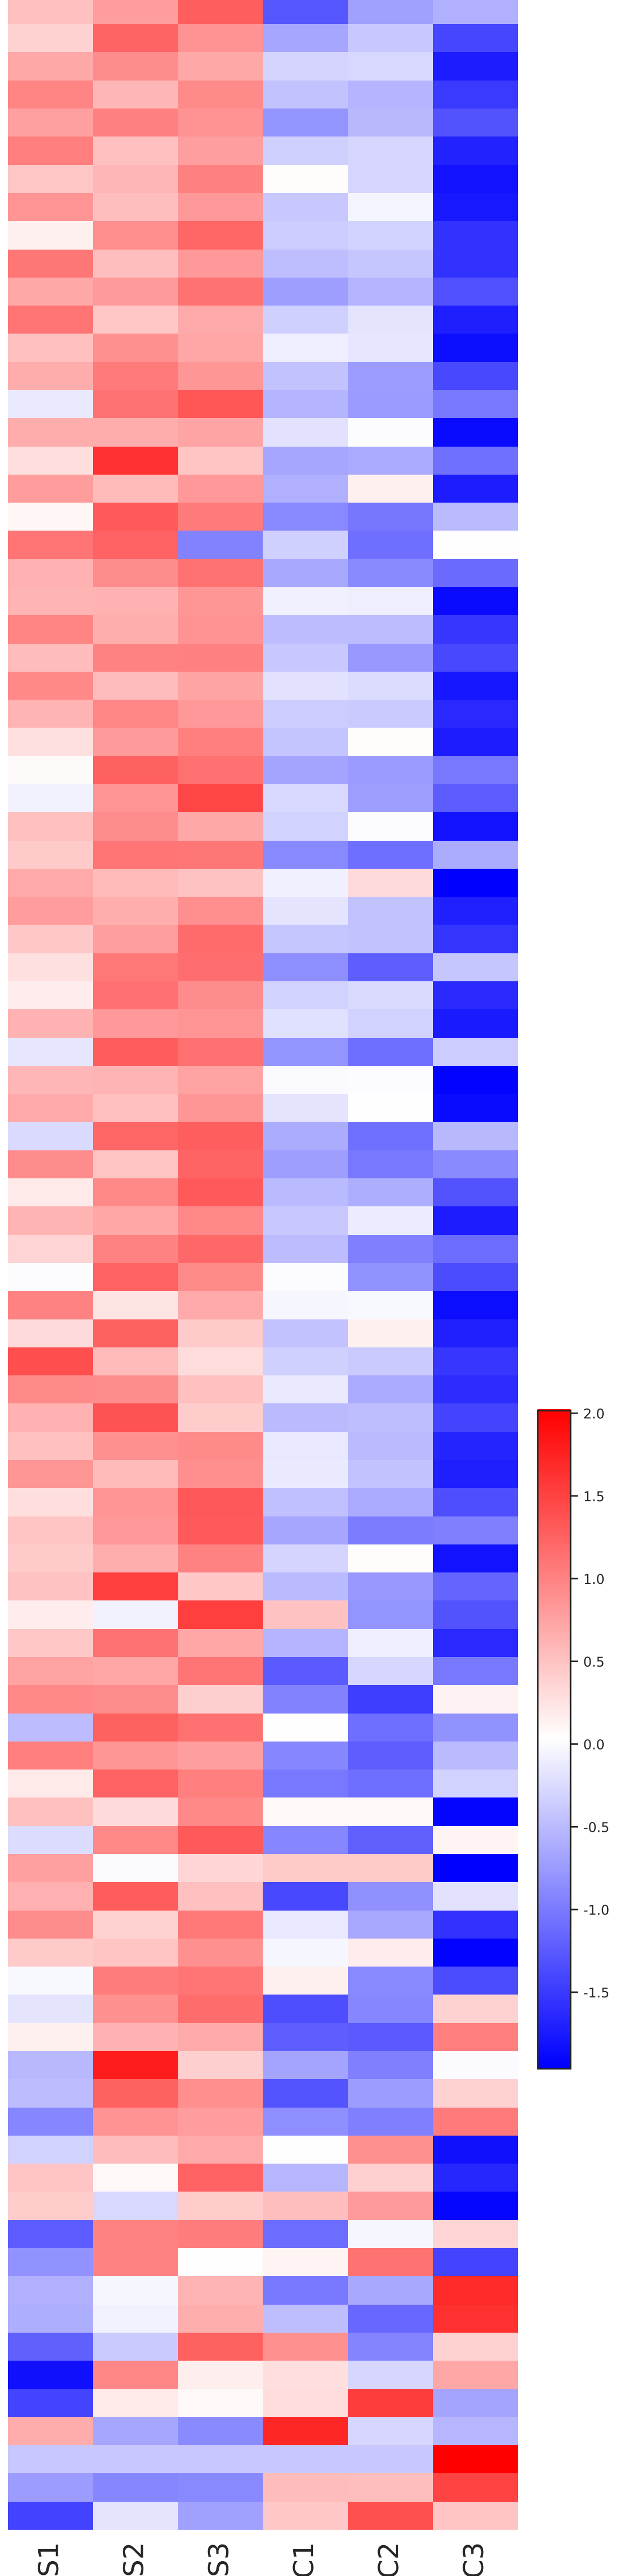

Supplement: Supplementary file 476 [file 7_Eukaryotic Translation Termination(R-HSA-72764).heatmap.pdf › Source data/1.RNA-Seq source data/2.HUVECs/result/1.6.GSEA/S-vs-C/rct/7_Eukaryotic Translation Termination(R-HSA-72764).heatmap.pdf]

**Nonsense Mediated Decay (NMD) independent of the Exon Jun...(R-HSA-975956)**

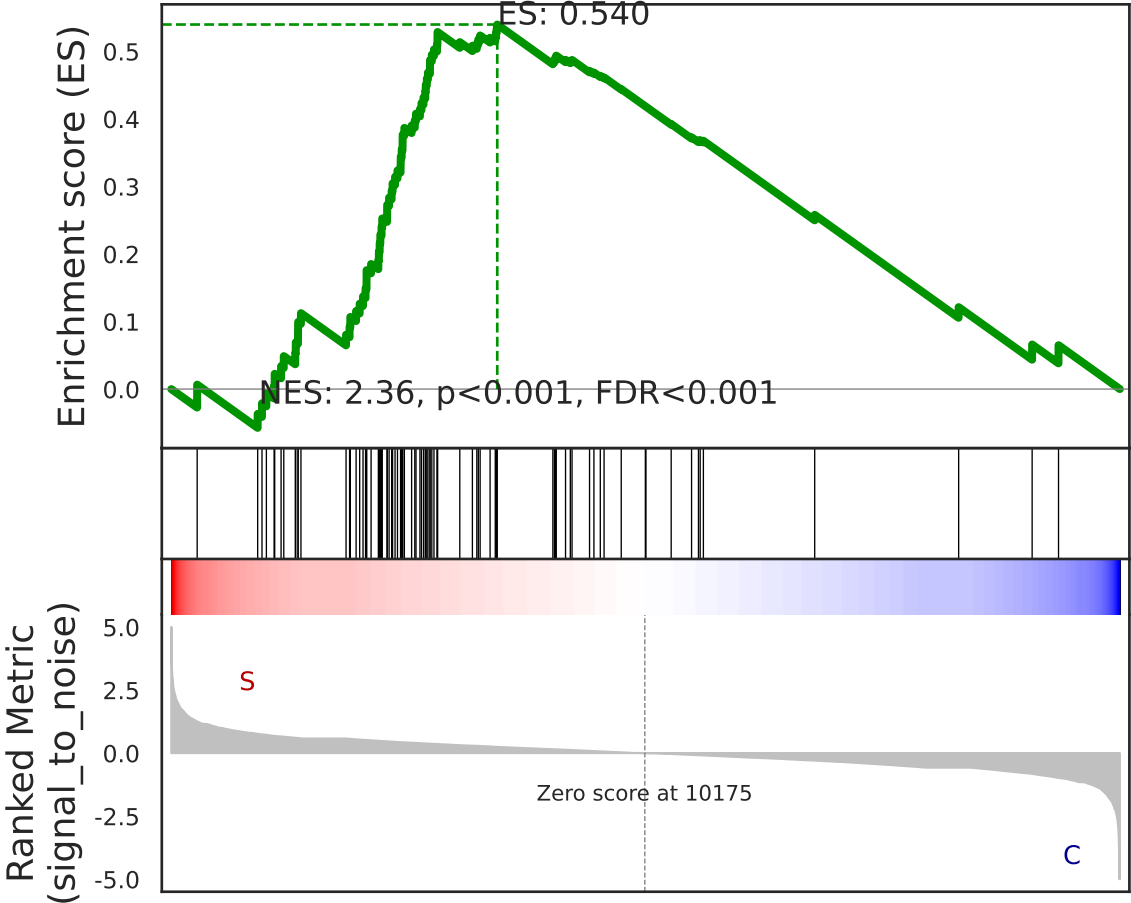

Supplement: Supplementary file 477 [file 8_Nonsense Mediated Decay (NMD) independent of the Exon Jun...(R-HSA-975956).gsea.pdf › Source data/1.RNA-Seq source data/2.HUVECs/result/1.6.GSEA/S-vs-C/rct/8_Nonsense Mediated Decay (NMD) independent of the Exon Jun...(R-HSA-975956).gsea.pdf]

Nonsense Mediated Decay (NMD) independent of the Exon Jun...(R-HSA-975956)  
Heatmap of the Analyzed GeneSet

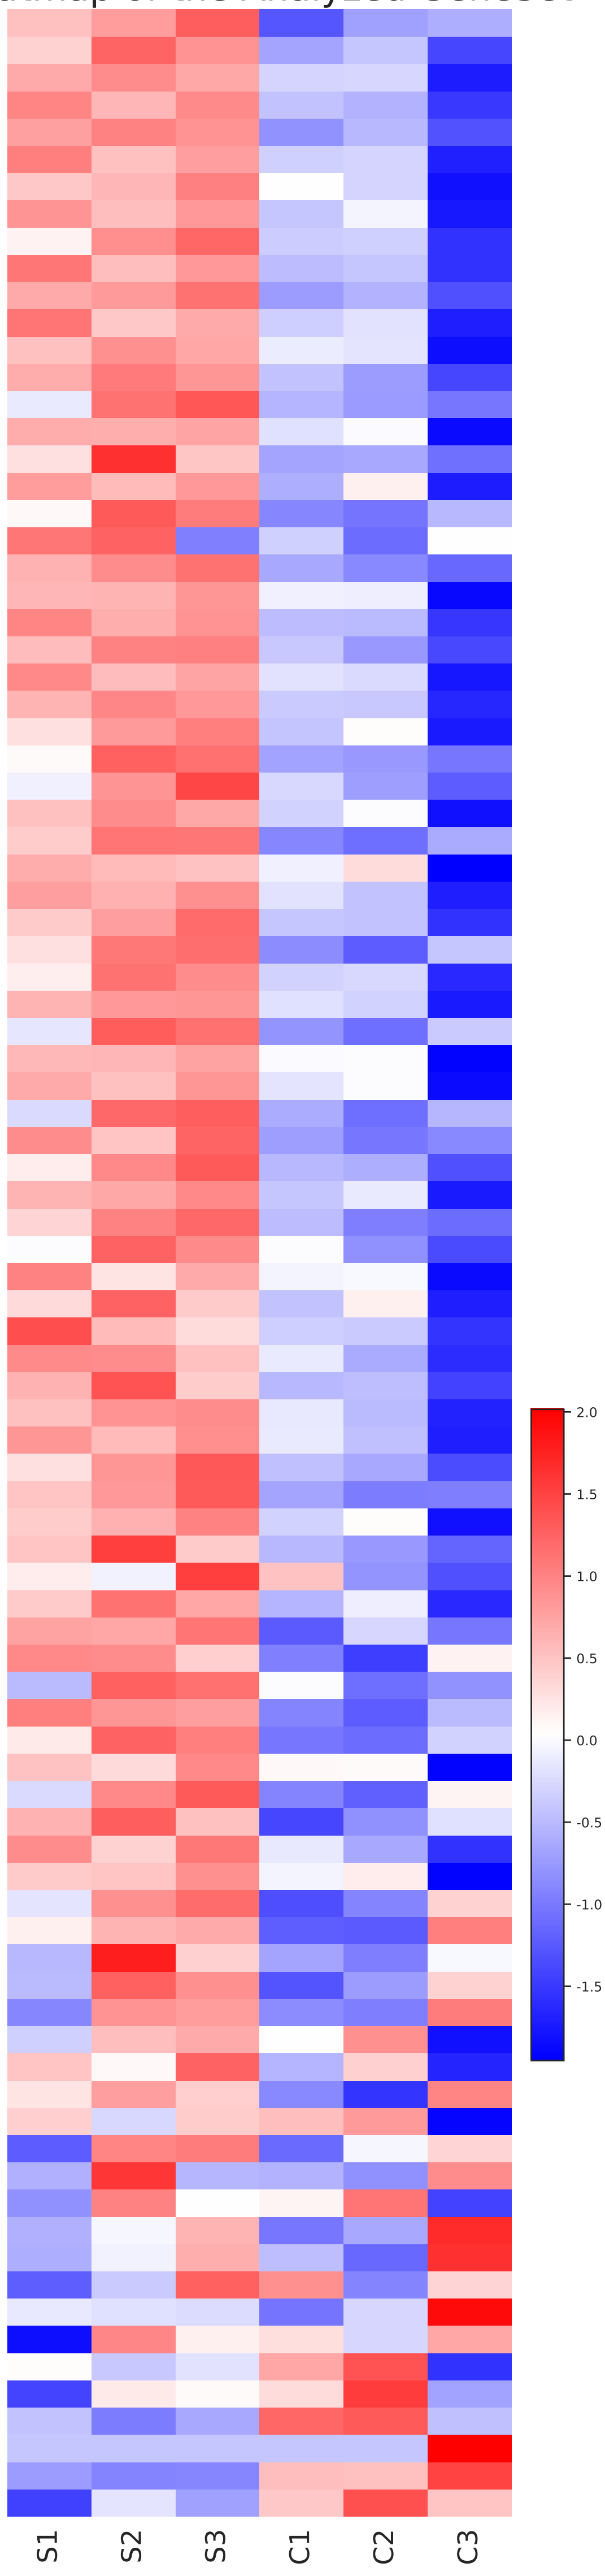

Supplement: Supplementary file 478 [file 8_Nonsense Mediated Decay (NMD) independent of the Exon Jun...(R-HSA-975956).heatmap.pdf › Source data/1.RNA-Seq source data/2.HUVECs/result/1.6.GSEA/S-vs-C/rct/8_Nonsense Mediated Decay (NMD) independent of the Exon Jun...(R-HSA-975956).heatmap.pdf]

# Response of EIF2AK1 (HRI) to heme deficiency(R-HSA-9648895)

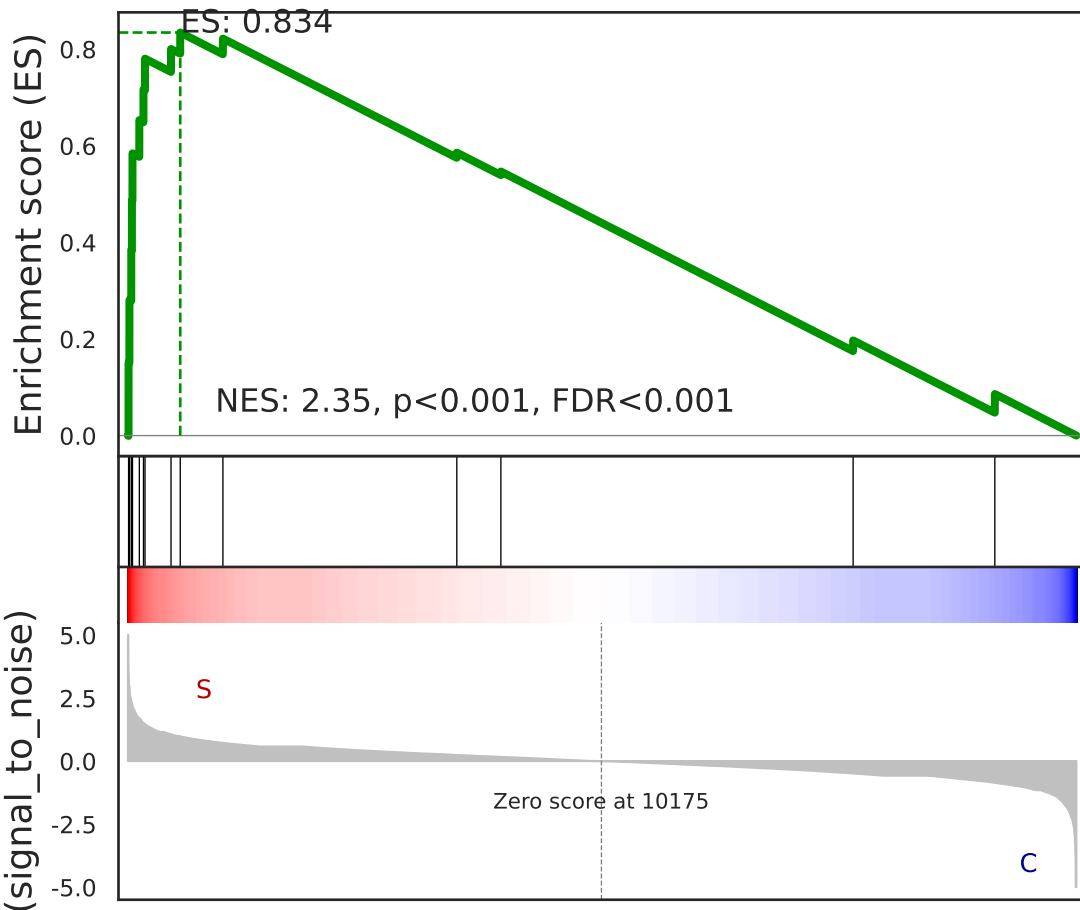

Supplement: Supplementary file 479 [file 9_Response of EIF2AK1 (HRI) to heme deficiency(R-HSA-9648895).gsea.pdf › Source data/1.RNA-Seq source data/2.HUVECs/result/1.6.GSEA/S-vs-C/rct/9_Response of EIF2AK1 (HRI) to heme deficiency(R-HSA-9648895).gsea.pdf]

Response of EIF2AK1 (HRI) to heme deficiency(R-HSA-9648895)  
Heatmap of the Analyzed GeneSet

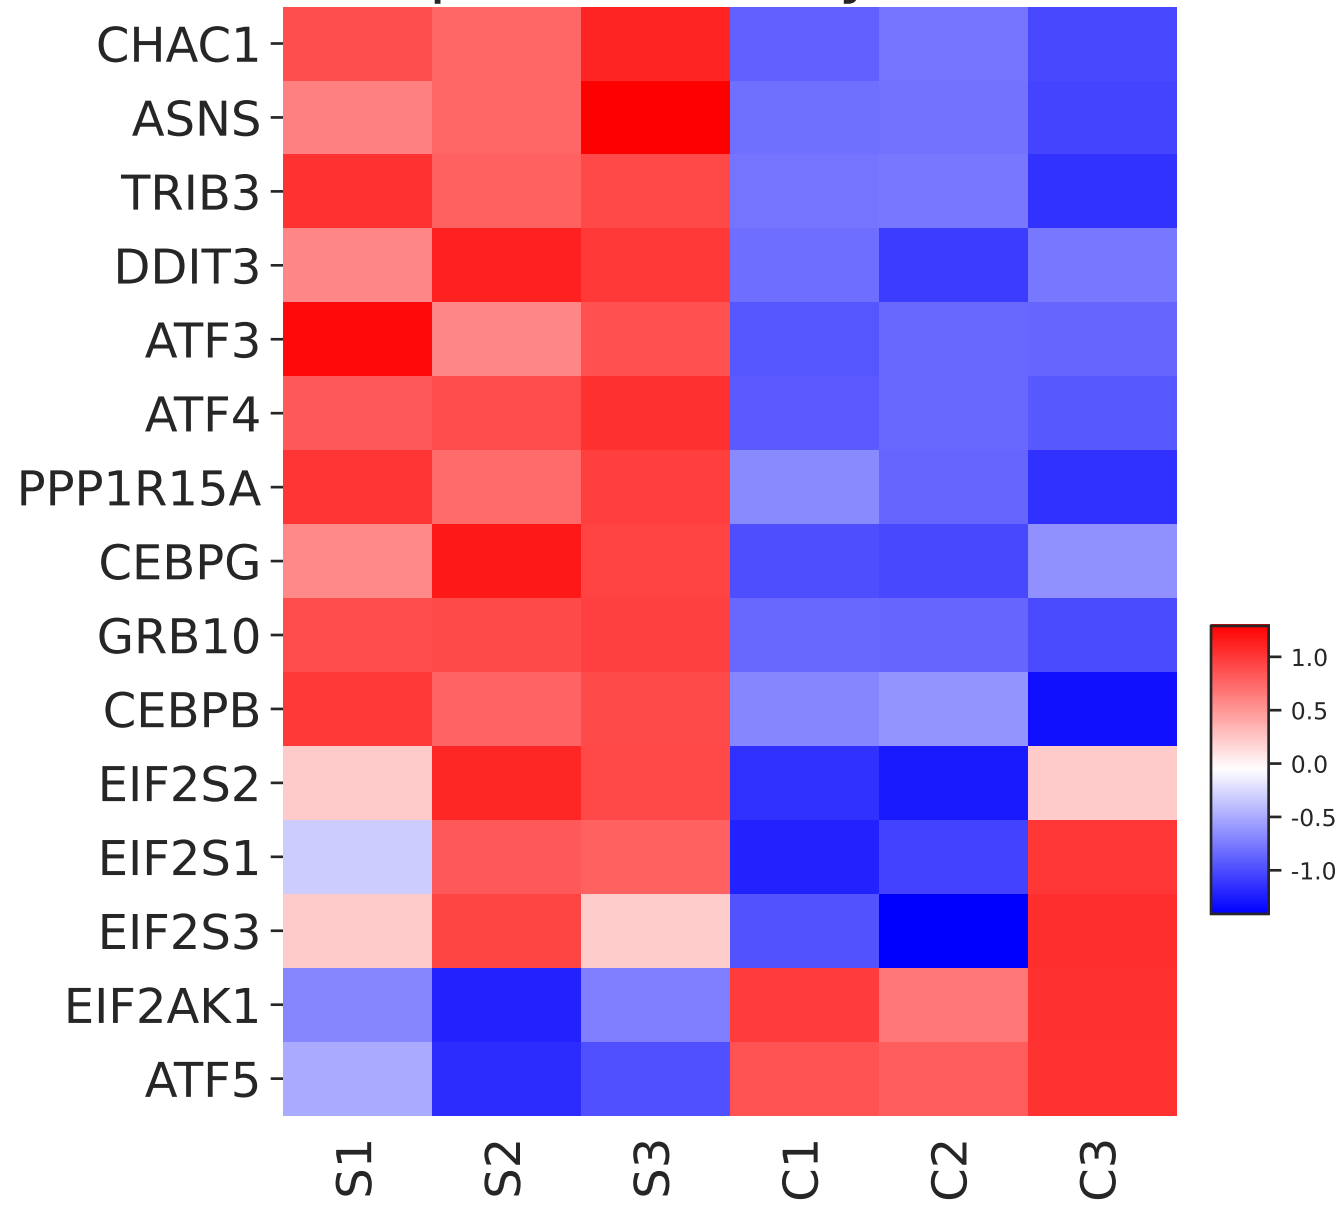

Supplement: Supplementary file 480 [file 9_Response of EIF2AK1 (HRI) to heme deficiency(R-HSA-9648895).heatmap.pdf › Source data/1.RNA-Seq source data/2.HUVECs/result/1.6.GSEA/S-vs-C/rct/9_Response of EIF2AK1 (HRI) to heme deficiency(R-HSA-9648895).heatmap.pdf]

# Pancreatic cancer subtypes(WP5390)

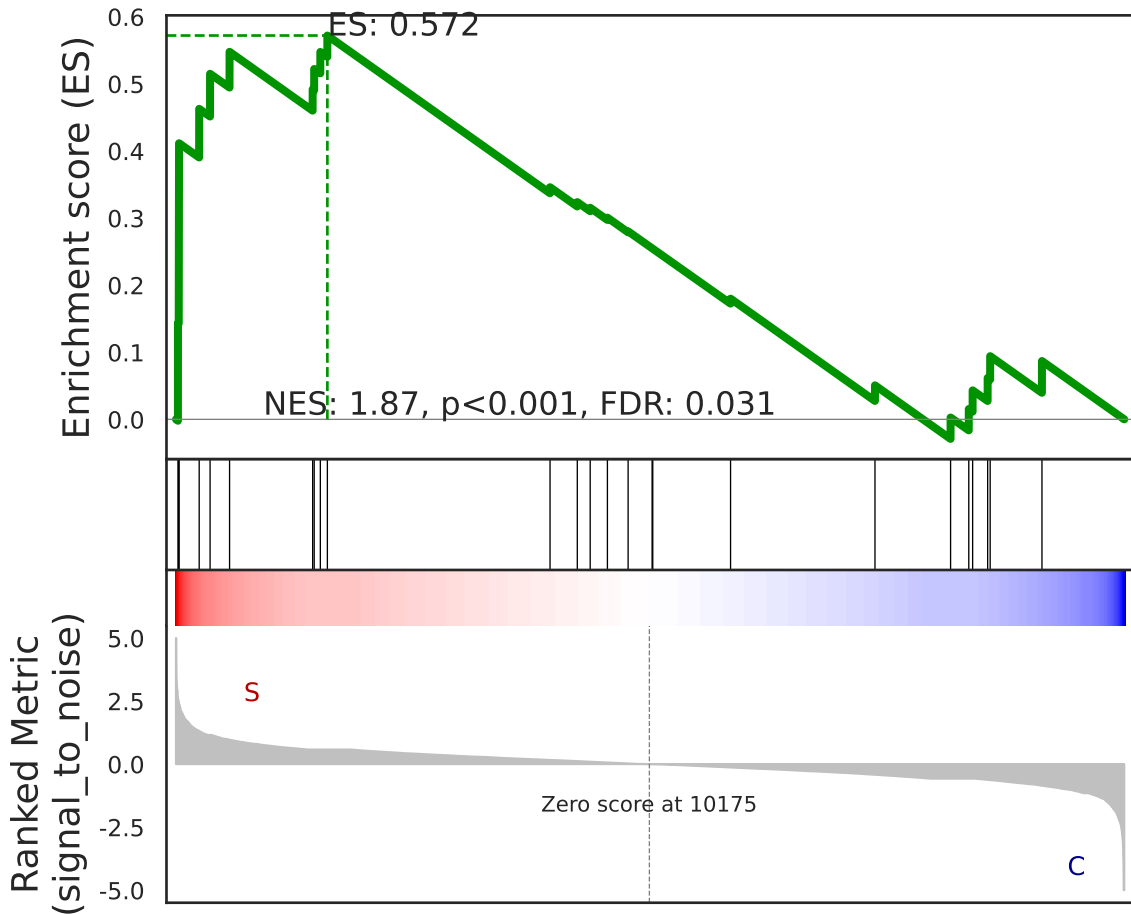

Supplement: Supplementary file 481 [file 10_Pancreatic cancer subtypes(WP5390).gsea.pdf › Source data/1.RNA-Seq source data/2.HUVECs/result/1.6.GSEA/S-vs-C/wiki/10_Pancreatic cancer subtypes(WP5390).gsea.pdf]

# Pancreatic cancer subtypes(WP5390)

## Heatmap of the Analyzed GeneSet

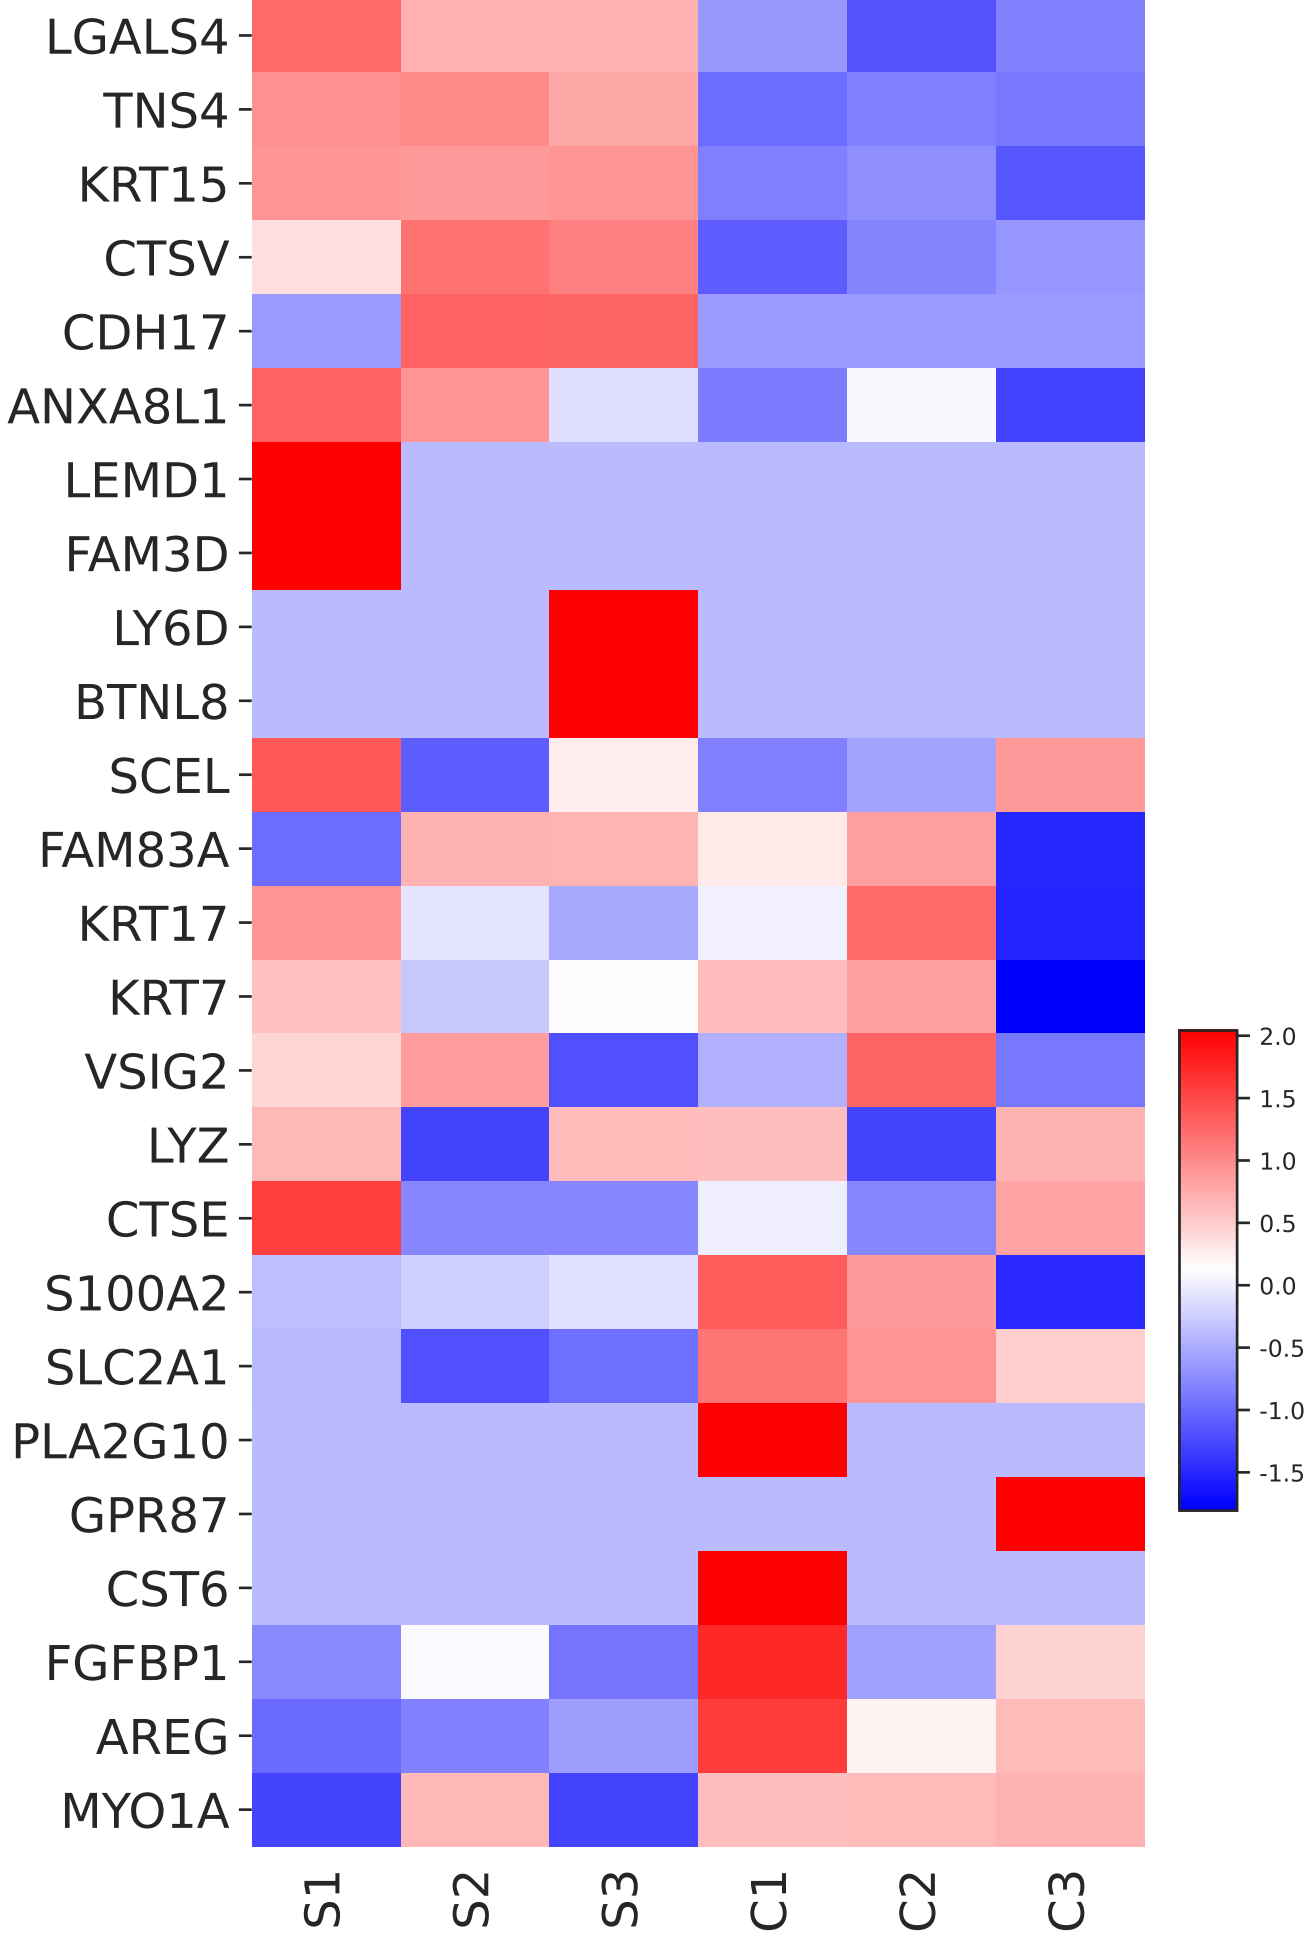

Supplement: Supplementary file 482 [file 10_Pancreatic cancer subtypes(WP5390).heatmap.pdf › Source data/1.RNA-Seq source data/2.HUVECs/result/1.6.GSEA/S-vs-C/wiki/10_Pancreatic cancer subtypes(WP5390).heatmap.pdf]

# Cytoplasmic ribosomal proteins(WP477)

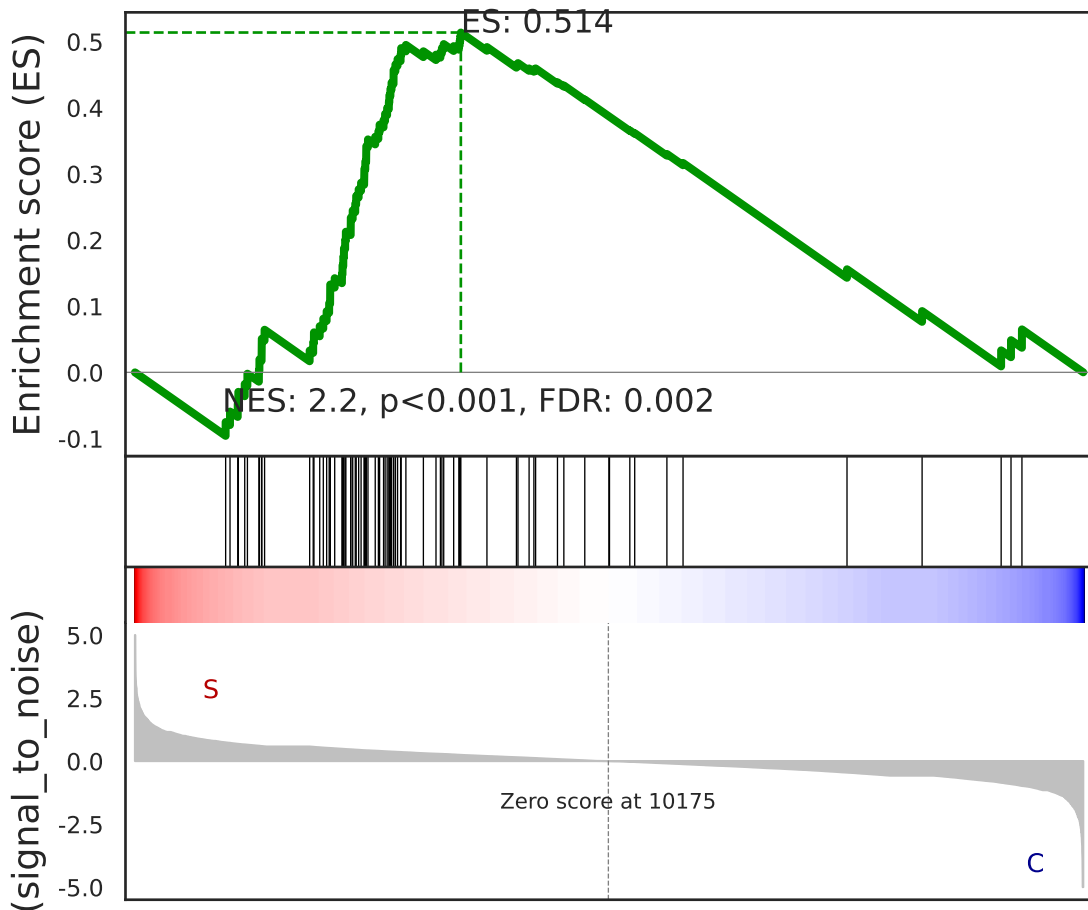

Supplement: Supplementary file 483 [file 1_Cytoplasmic ribosomal proteins(WP477).gsea.pdf › Source data/1.RNA-Seq source data/2.HUVECs/result/1.6.GSEA/S-vs-C/wiki/1_Cytoplasmic ribosomal proteins(WP477).gsea.pdf]

Heatmap of the Analyzed GeneSet

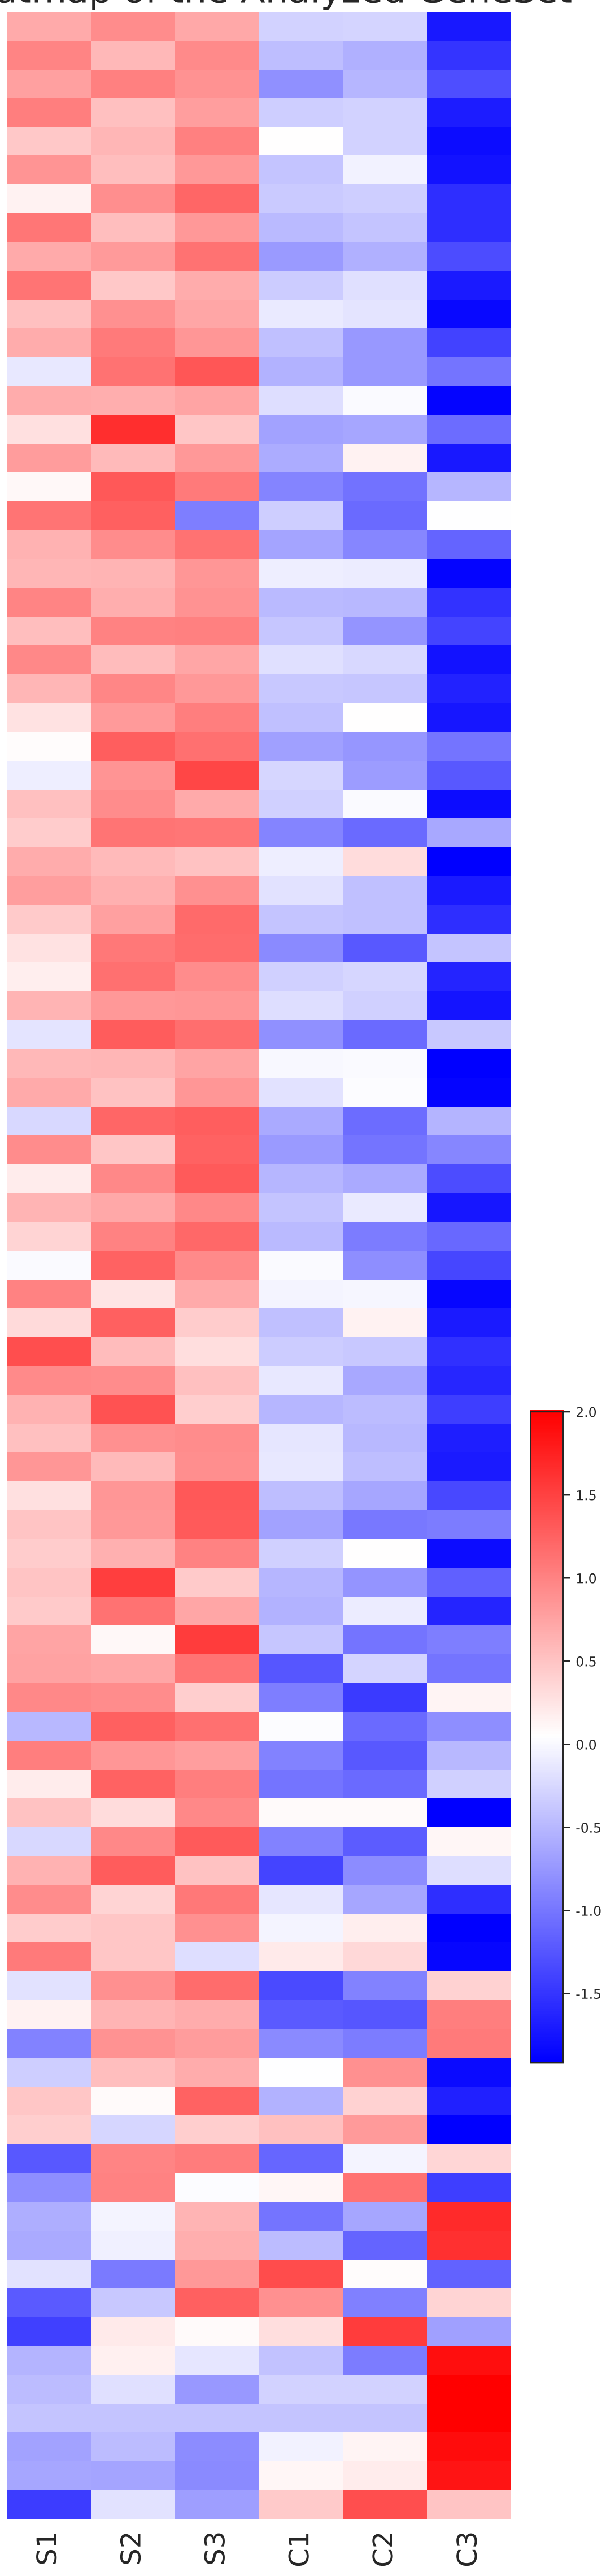

Supplement: Supplementary file 484 [file 1_Cytoplasmic ribosomal proteins(WP477).heatmap.pdf › Source data/1.RNA-Seq source data/2.HUVECs/result/1.6.GSEA/S-vs-C/wiki/1_Cytoplasmic ribosomal proteins(WP477).heatmap.pdf]

# Photodynamic therapy-induced unfolded protein response(WP3613)

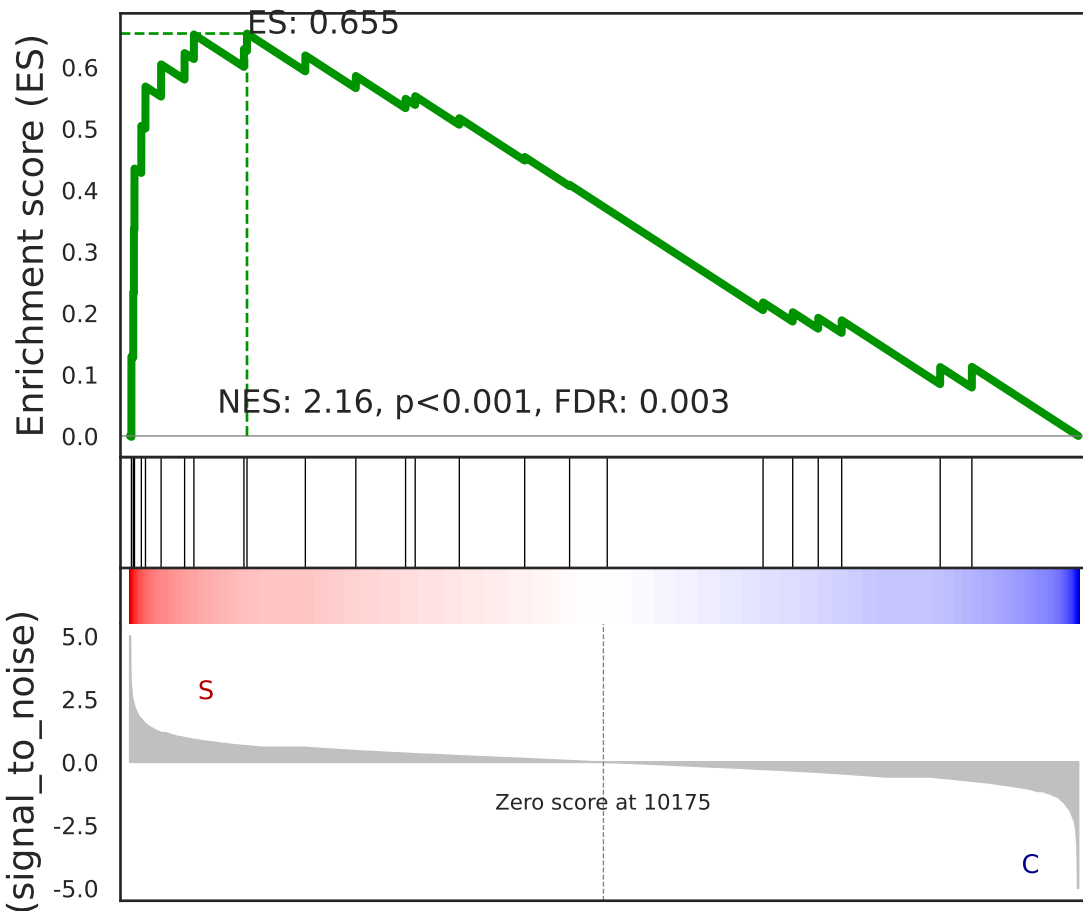

Supplement: Supplementary file 485 [file 2_Photodynamic therapy-induced unfolded protein response(WP3613).gsea.pdf › Source data/1.RNA-Seq source data/2.HUVECs/result/1.6.GSEA/S-vs-C/wiki/2_Photodynamic therapy-induced unfolded protein response(WP3613).gsea.pdf]

Photodynamic therapy-induced unfolded protein response(WP3613)  
Heatmap of the Analyzed GeneSet

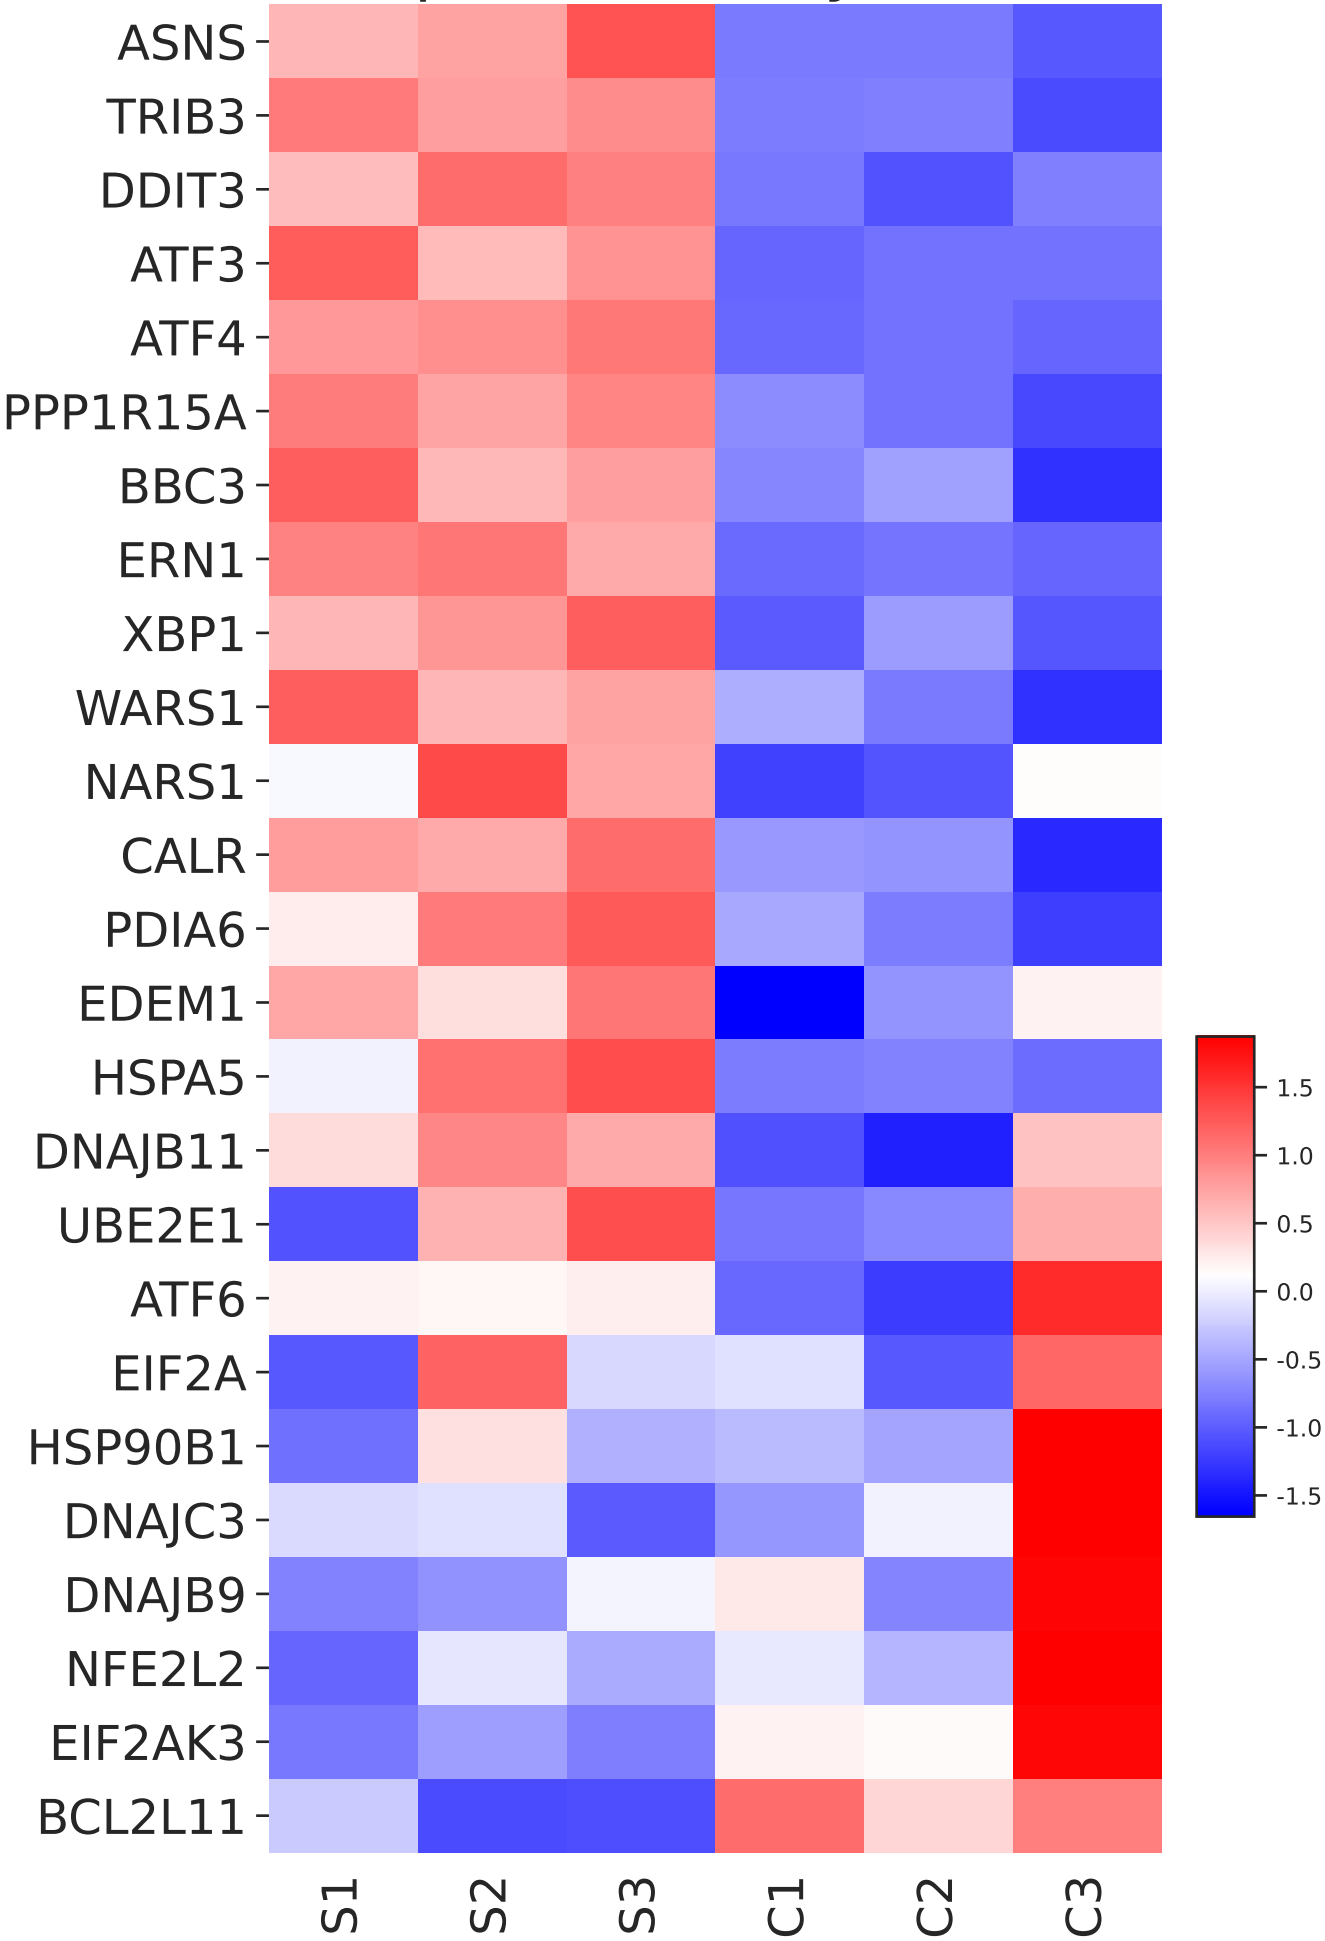

Supplement: Supplementary file 486 [file 2_Photodynamic therapy-induced unfolded protein response(WP3613).heatmap.pdf › Source data/1.RNA-Seq source data/2.HUVECs/result/1.6.GSEA/S-vs-C/wiki/2_Photodynamic therapy-induced unfolded protein response(WP3613).heatmap.pdf]

# Unfolded protein response(WP4925)

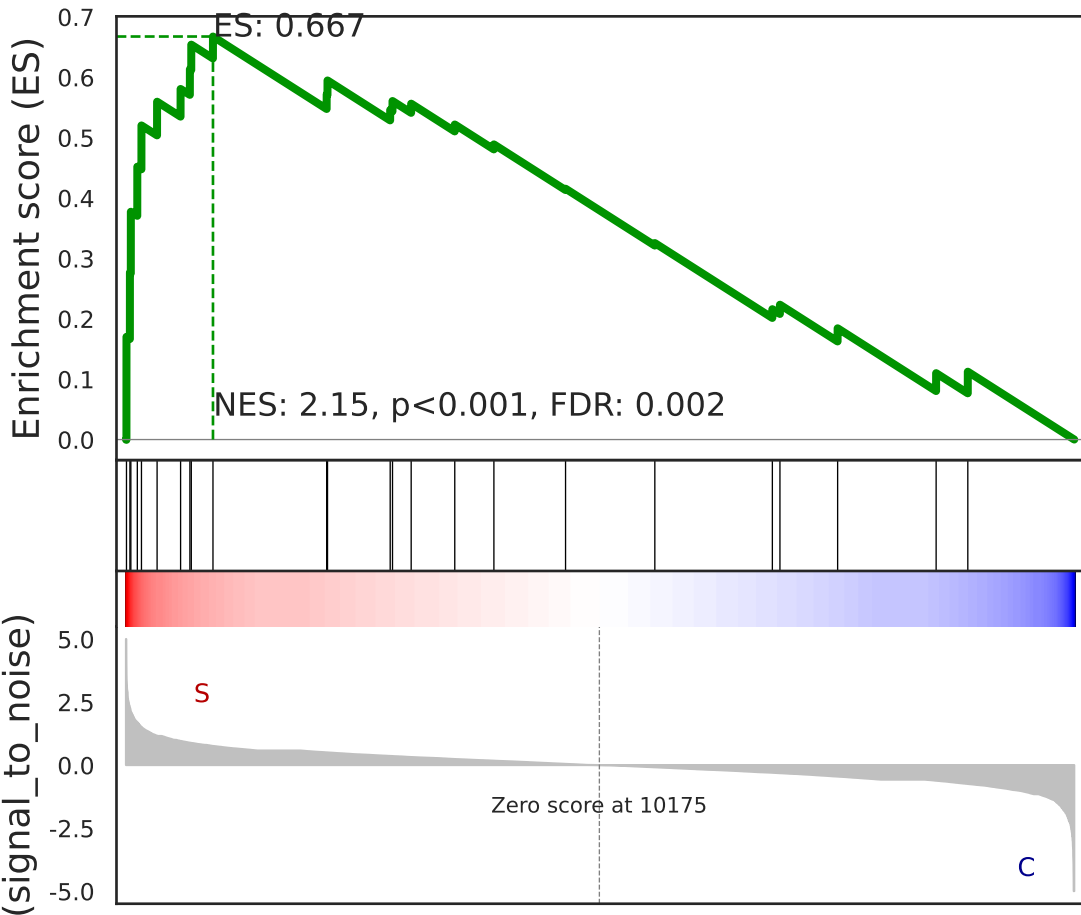

Supplement: Supplementary file 487 [file 3_Unfolded protein response(WP4925).gsea.pdf › Source data/1.RNA-Seq source data/2.HUVECs/result/1.6.GSEA/S-vs-C/wiki/3_Unfolded protein response(WP4925).gsea.pdf]

Unfolded protein response(WP4925)  
Heatmap of the Analyzed GeneSet

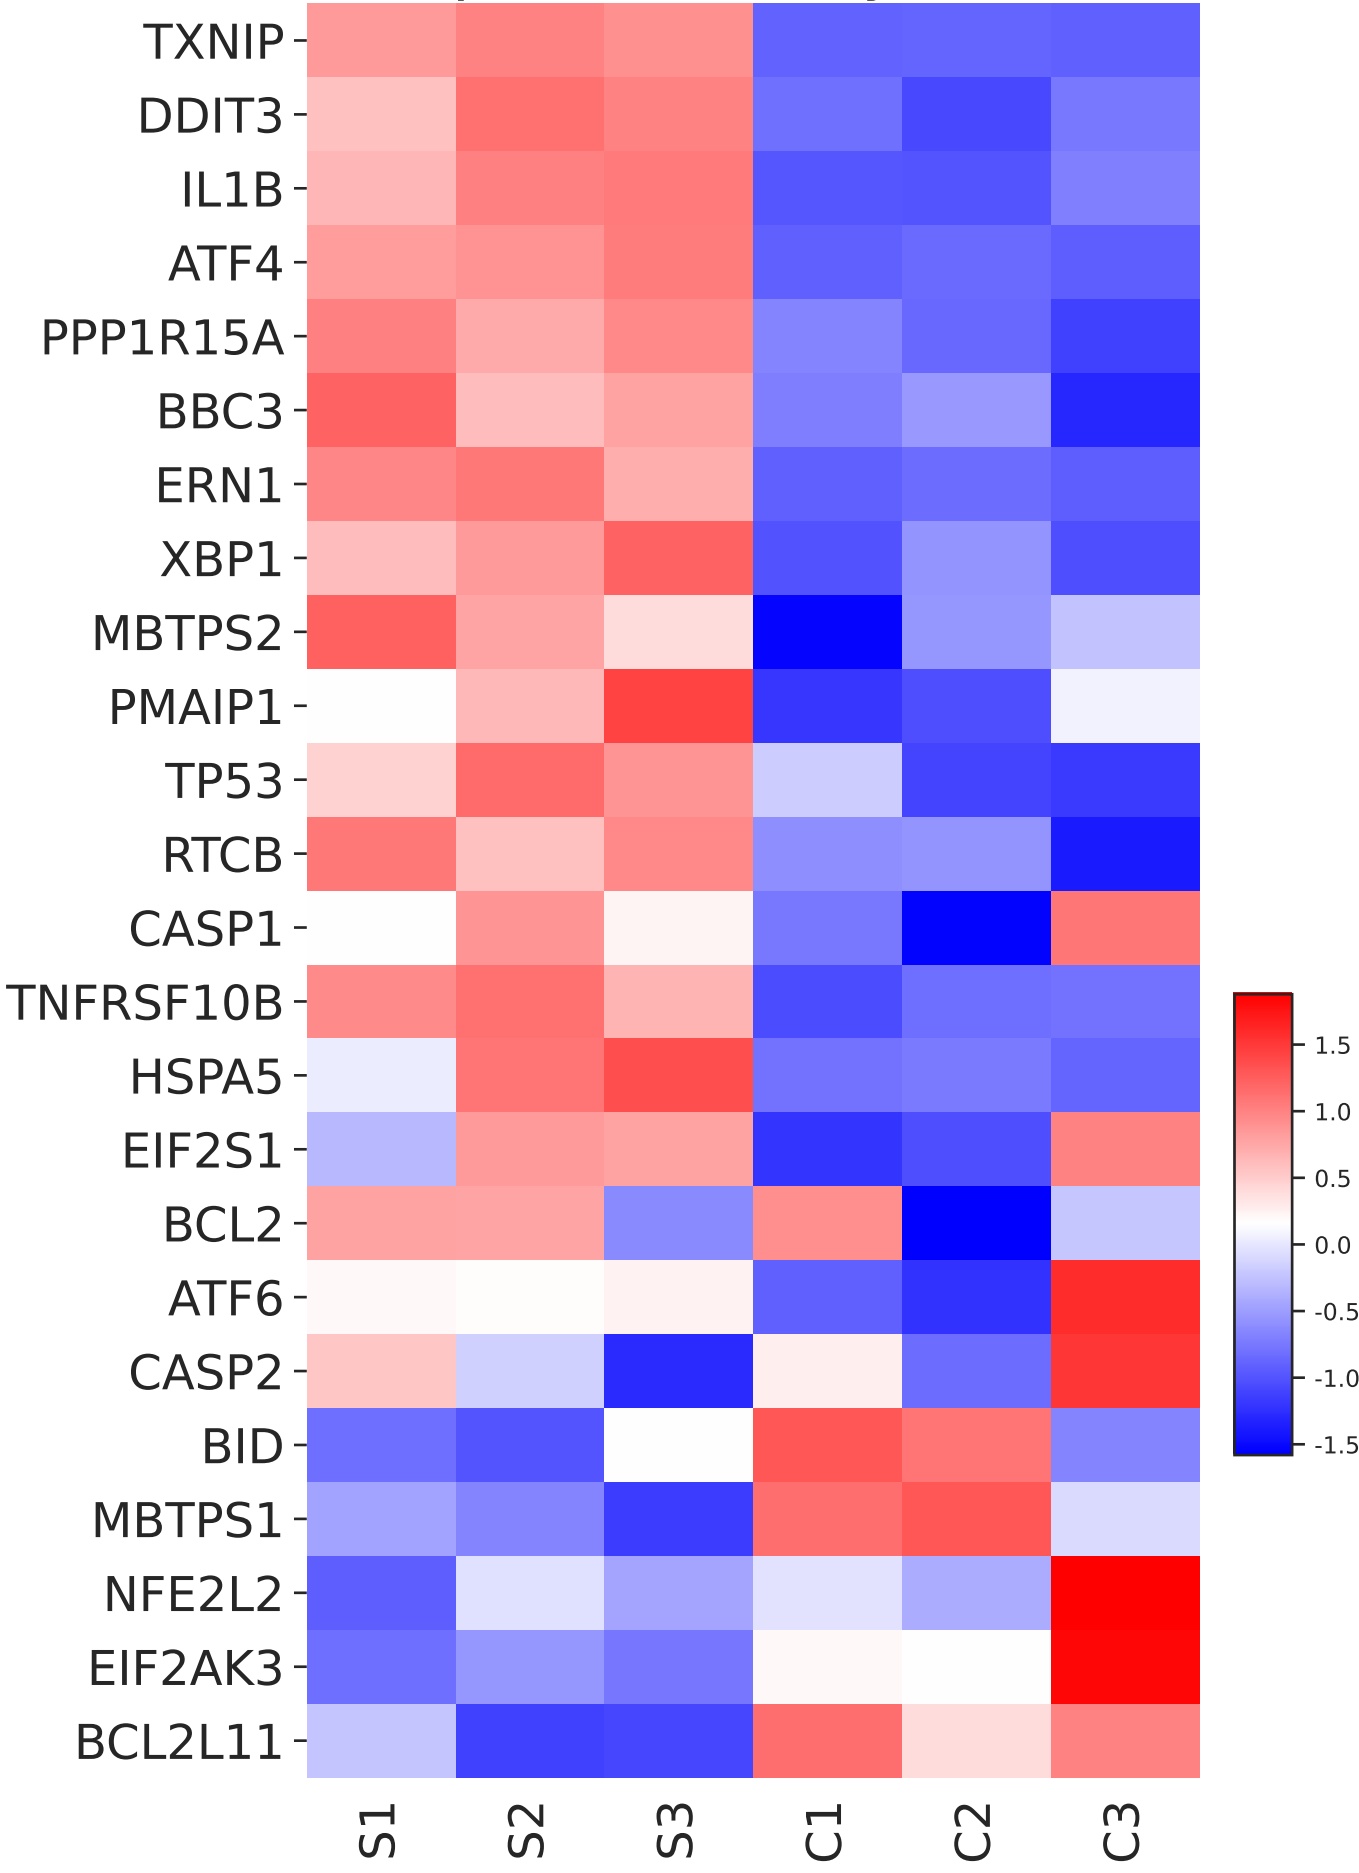

Supplement: Supplementary file 488 [file 3_Unfolded protein response(WP4925).heatmap.pdf › Source data/1.RNA-Seq source data/2.HUVECs/result/1.6.GSEA/S-vs-C/wiki/3_Unfolded protein response(WP4925).heatmap.pdf]

# DNA replication(WP466)

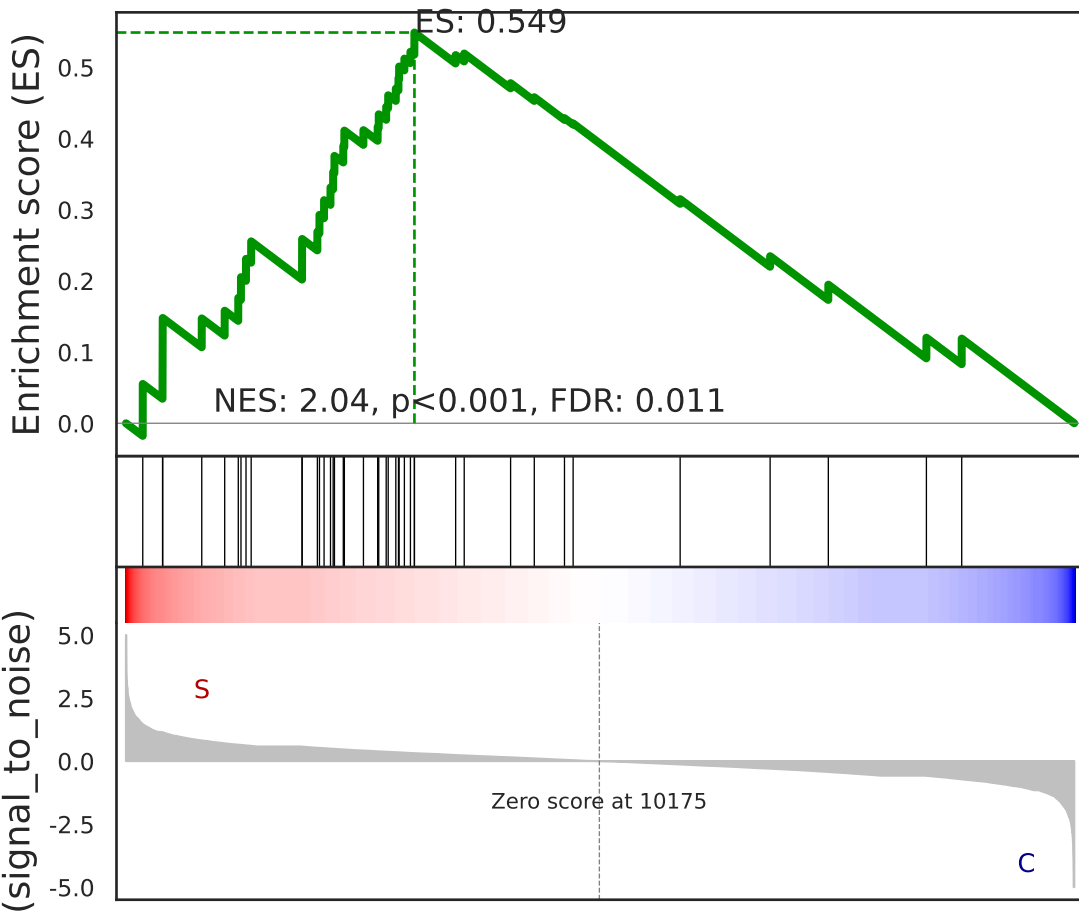

Supplement: Supplementary file 489 [file 4_DNA replication(WP466).gsea.pdf › Source data/1.RNA-Seq source data/2.HUVECs/result/1.6.GSEA/S-vs-C/wiki/4_DNA replication(WP466).gsea.pdf]

DNA replication(WP466)

Heatmap of the Analyzed GeneSet

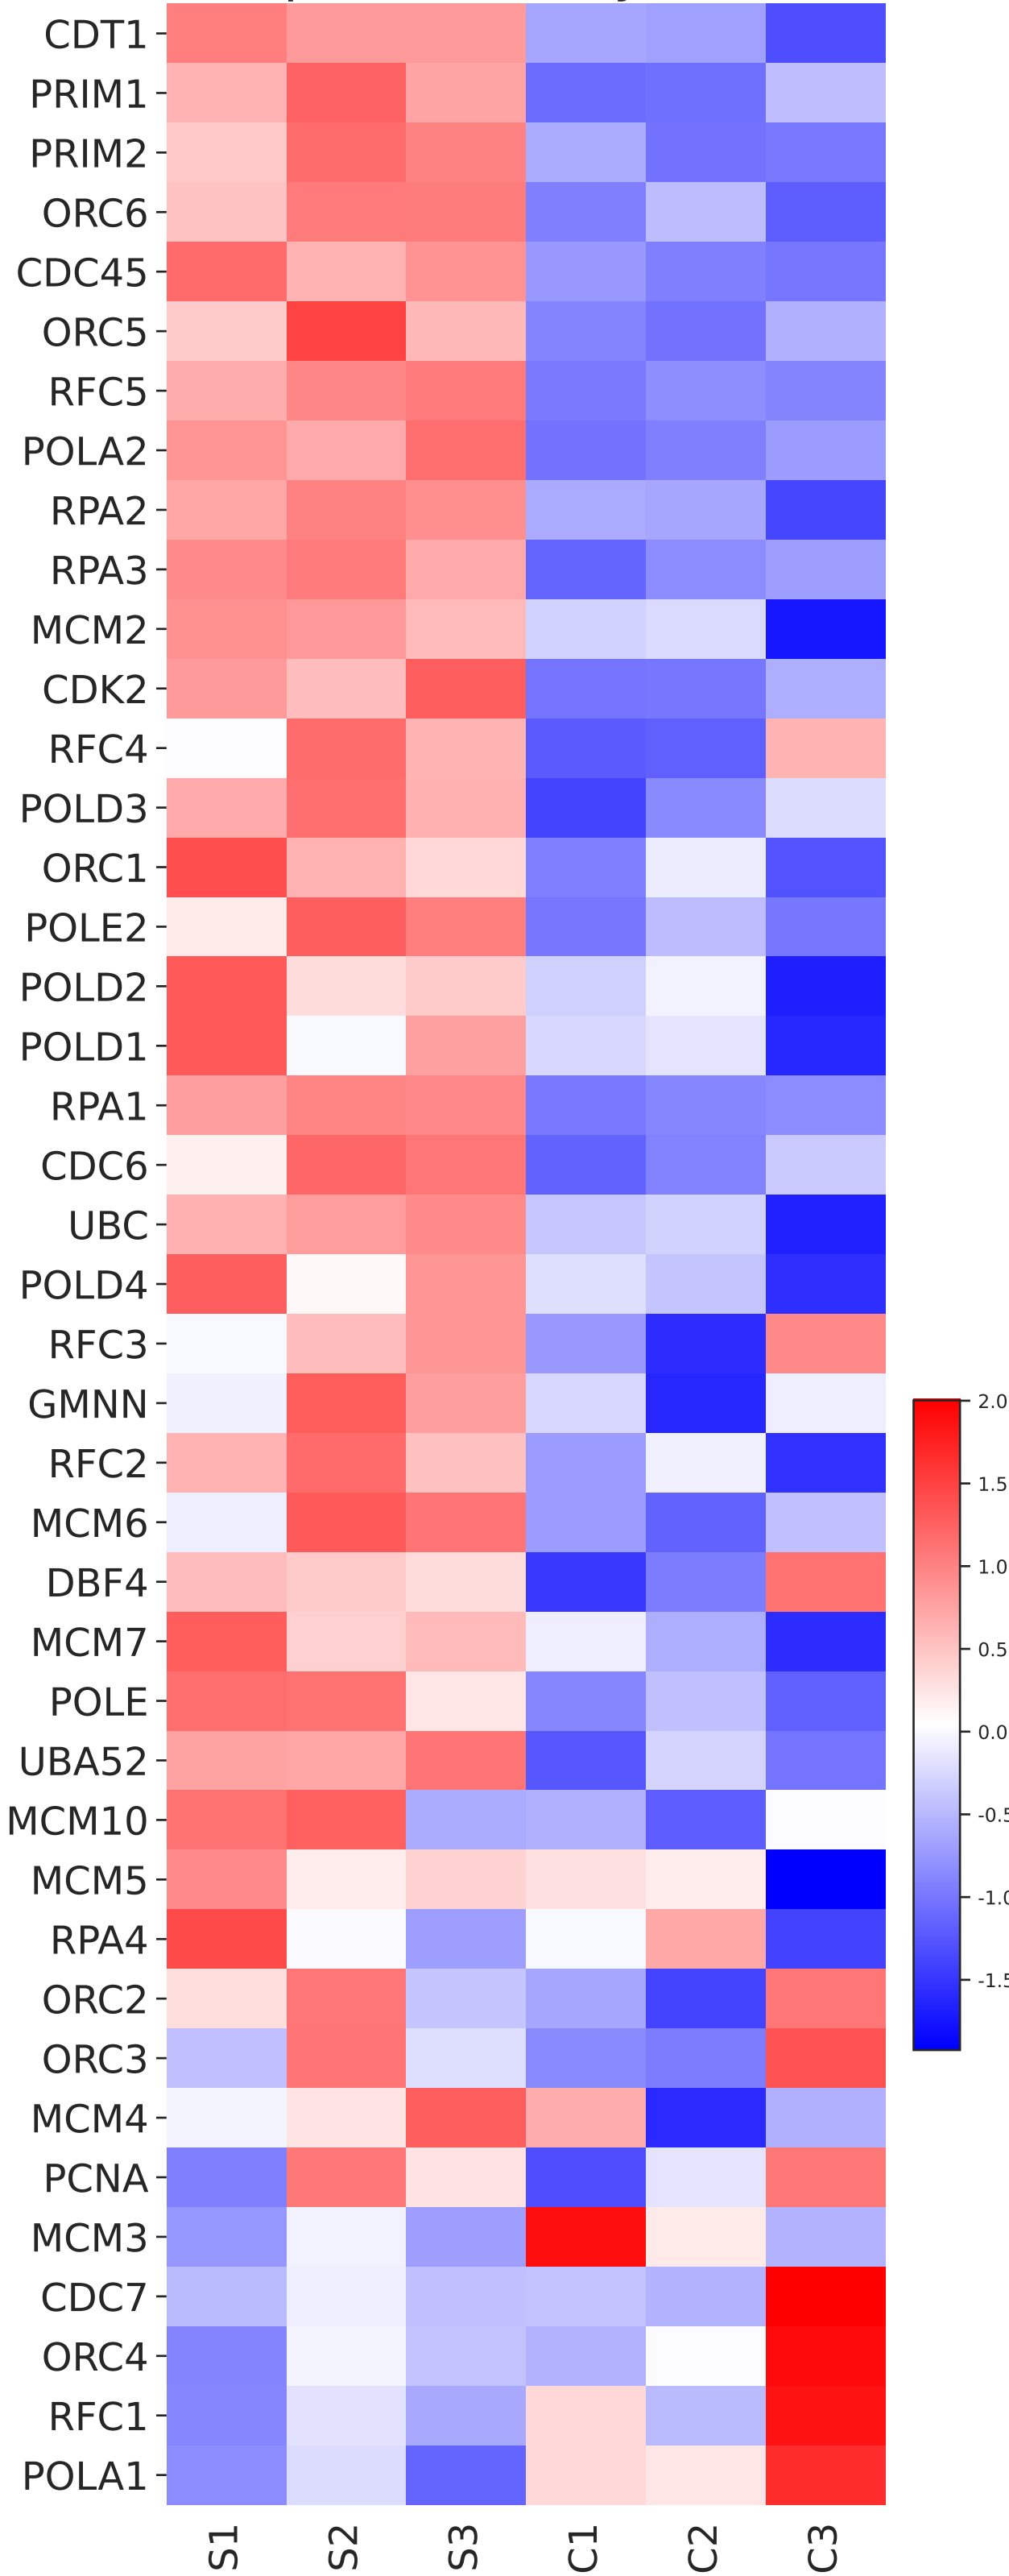

Supplement: Supplementary file 490 [file 4_DNA replication(WP466).heatmap.pdf › Source data/1.RNA-Seq source data/2.HUVECs/result/1.6.GSEA/S-vs-C/wiki/4_DNA replication(WP466).heatmap.pdf]

# IL6 signaling pathway(WP364)

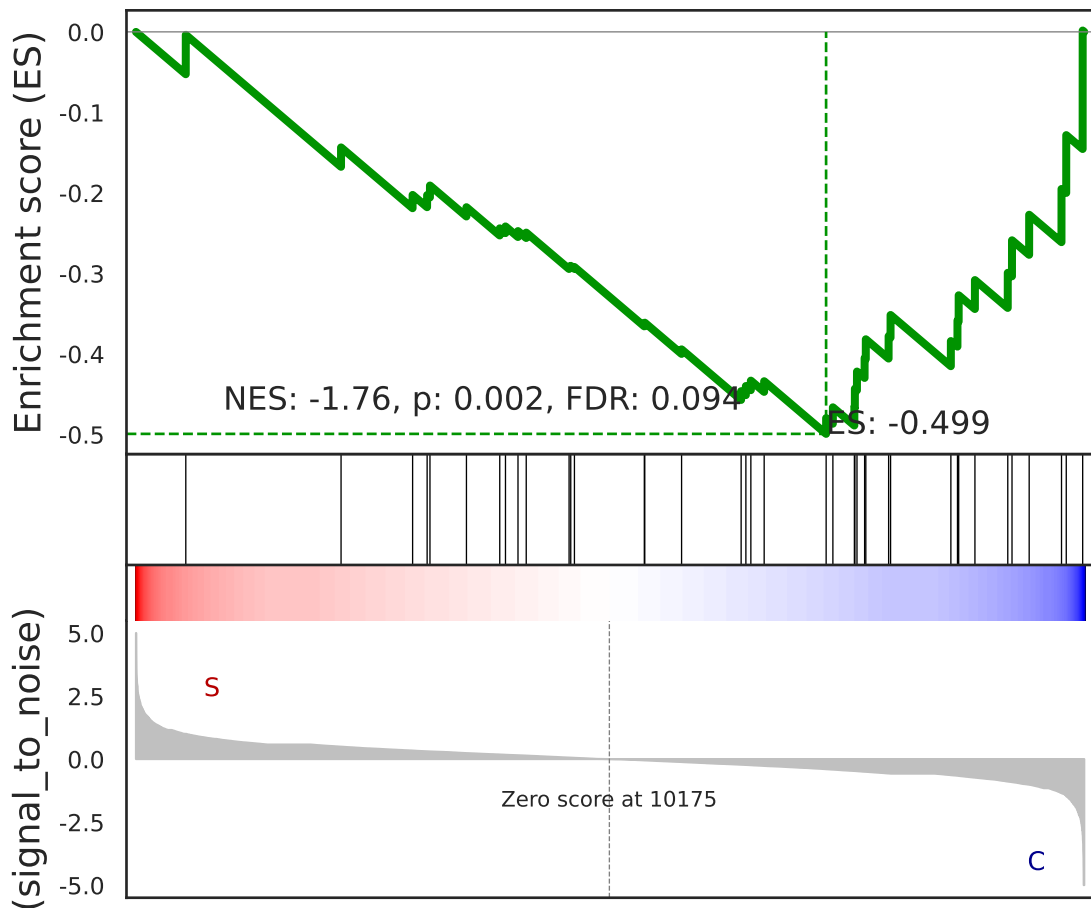

Supplement: Supplementary file 491 [file 519_IL6 signaling pathway(WP364).gsea.pdf › Source data/1.RNA-Seq source data/2.HUVECs/result/1.6.GSEA/S-vs-C/wiki/519_IL6 signaling pathway(WP364).gsea.pdf]

IL6 signaling pathway(WP364)  
Heatmap of the Analyzed GeneSet

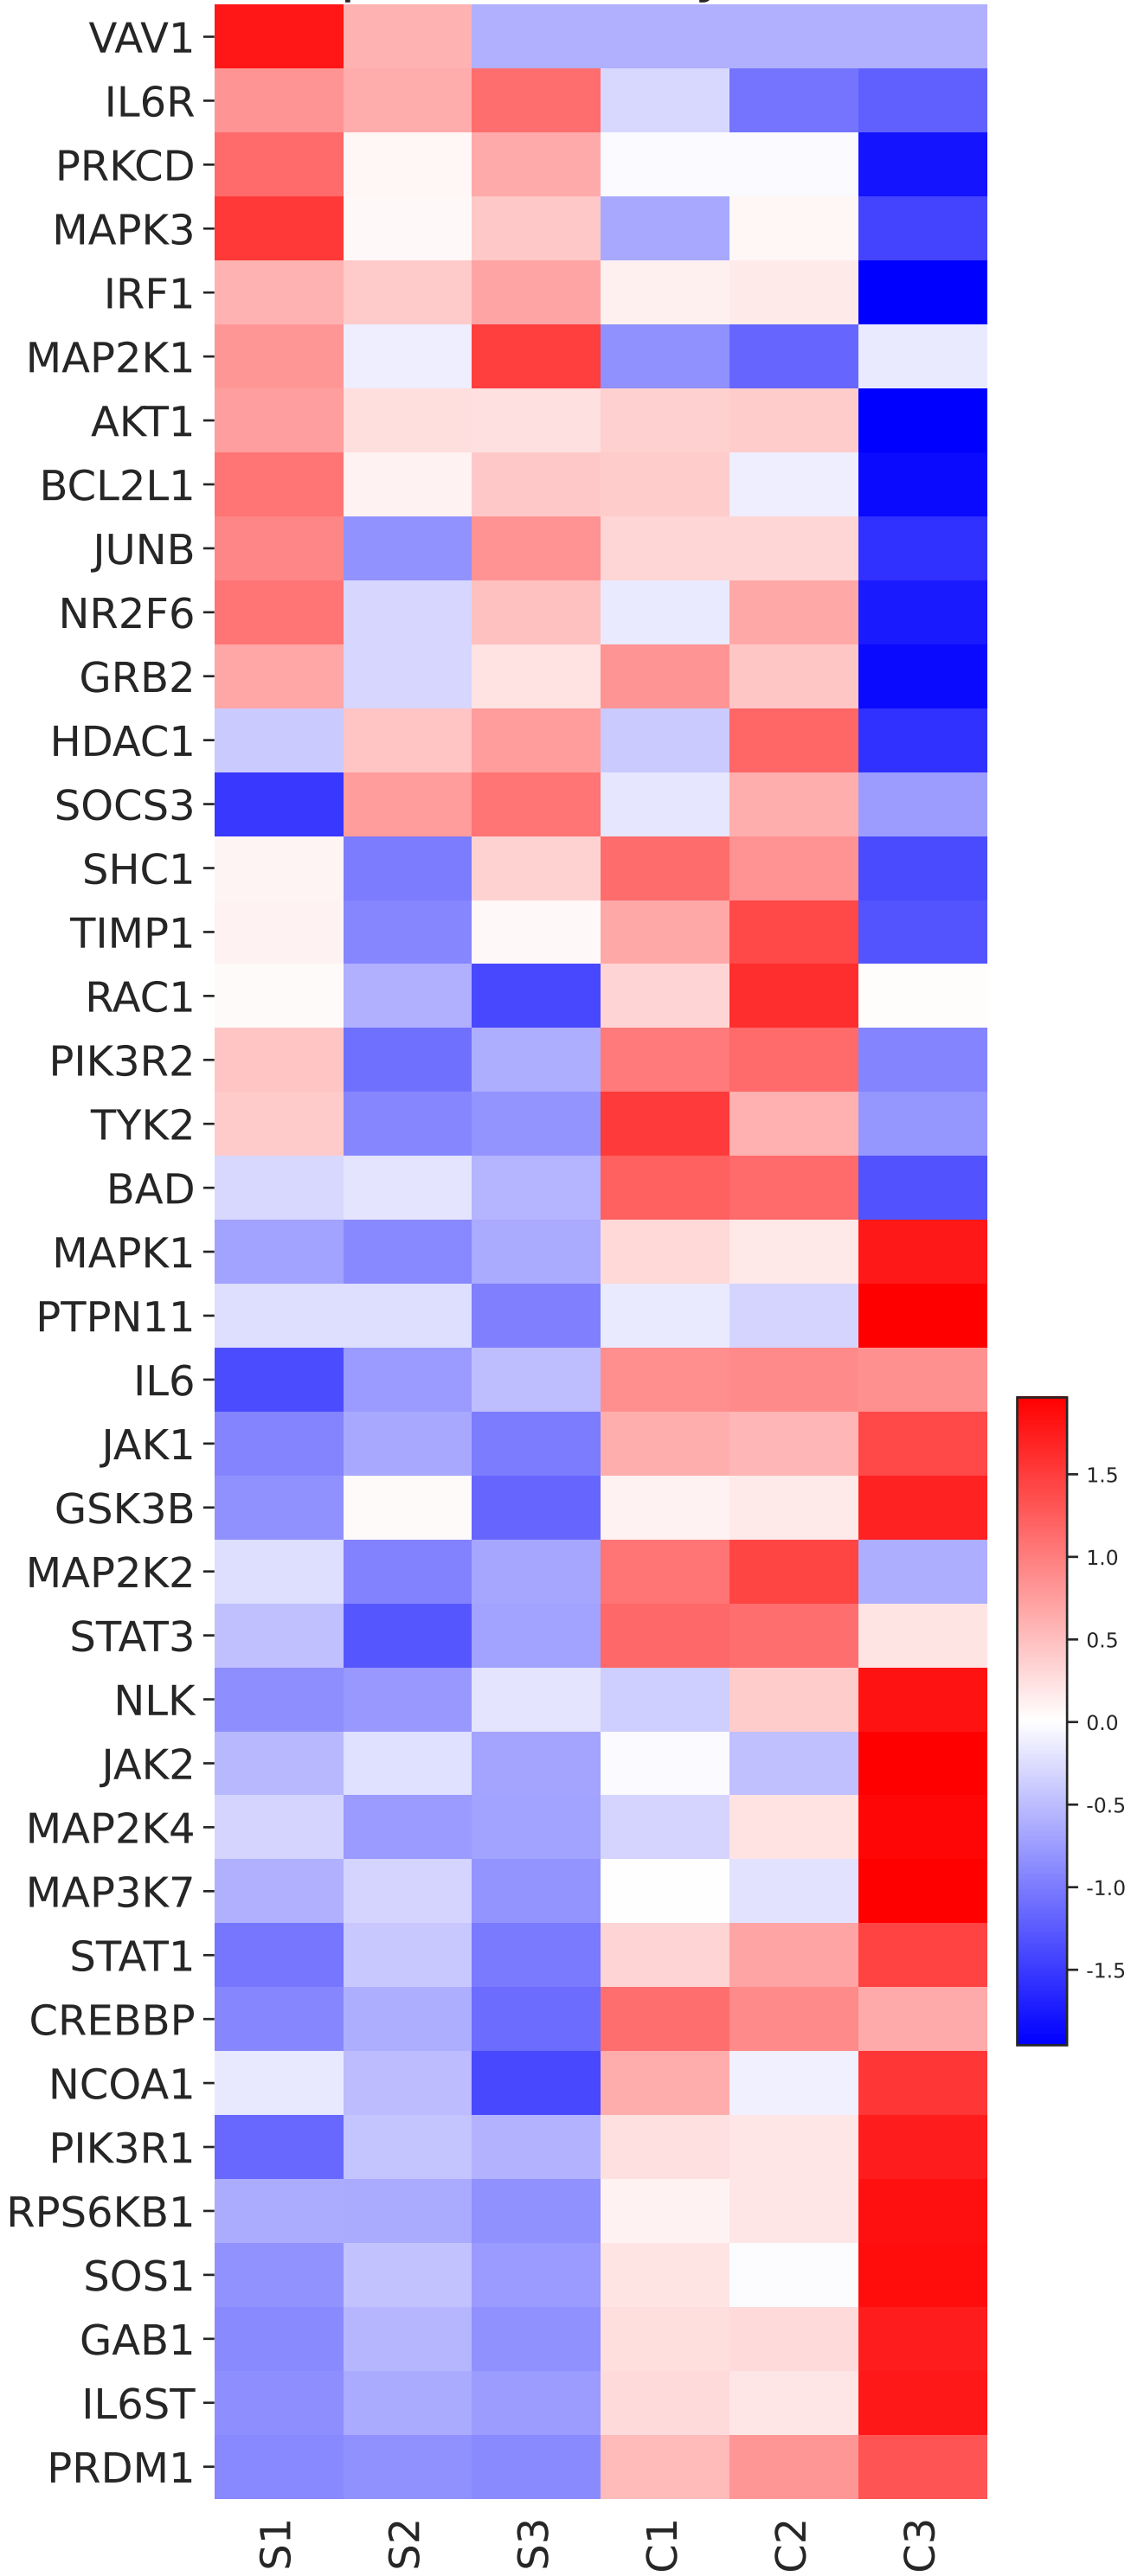

Supplement: Supplementary file 492 [file 519_IL6 signaling pathway(WP364).heatmap.pdf › Source data/1.RNA-Seq source data/2.HUVECs/result/1.6.GSEA/S-vs-C/wiki/519_IL6 signaling pathway(WP364).heatmap.pdf]

# SREBF and miR33 in cholesterol and lipid homeostasis(WP2011)

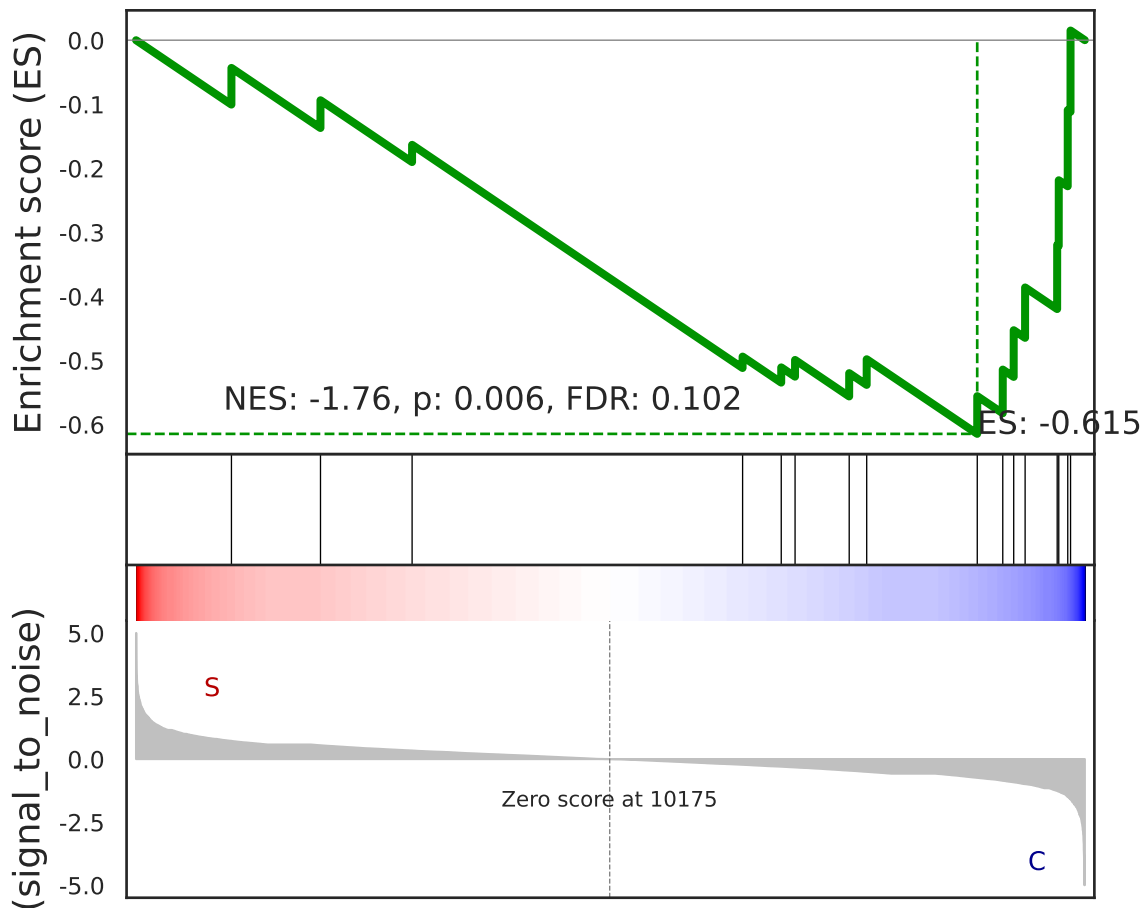

Supplement: Supplementary file 493 [file 520_SREBF and miR33 in cholesterol and lipid homeostasis(WP2011).gsea.pdf › Source data/1.RNA-Seq source data/2.HUVECs/result/1.6.GSEA/S-vs-C/wiki/520_SREBF and miR33 in cholesterol and lipid homeostasis(WP2011).gsea.pdf]

# SREBF and miR33 in cholesterol and lipid homeostasis(WP2011)

## Heatmap of the Analyzed GeneSet

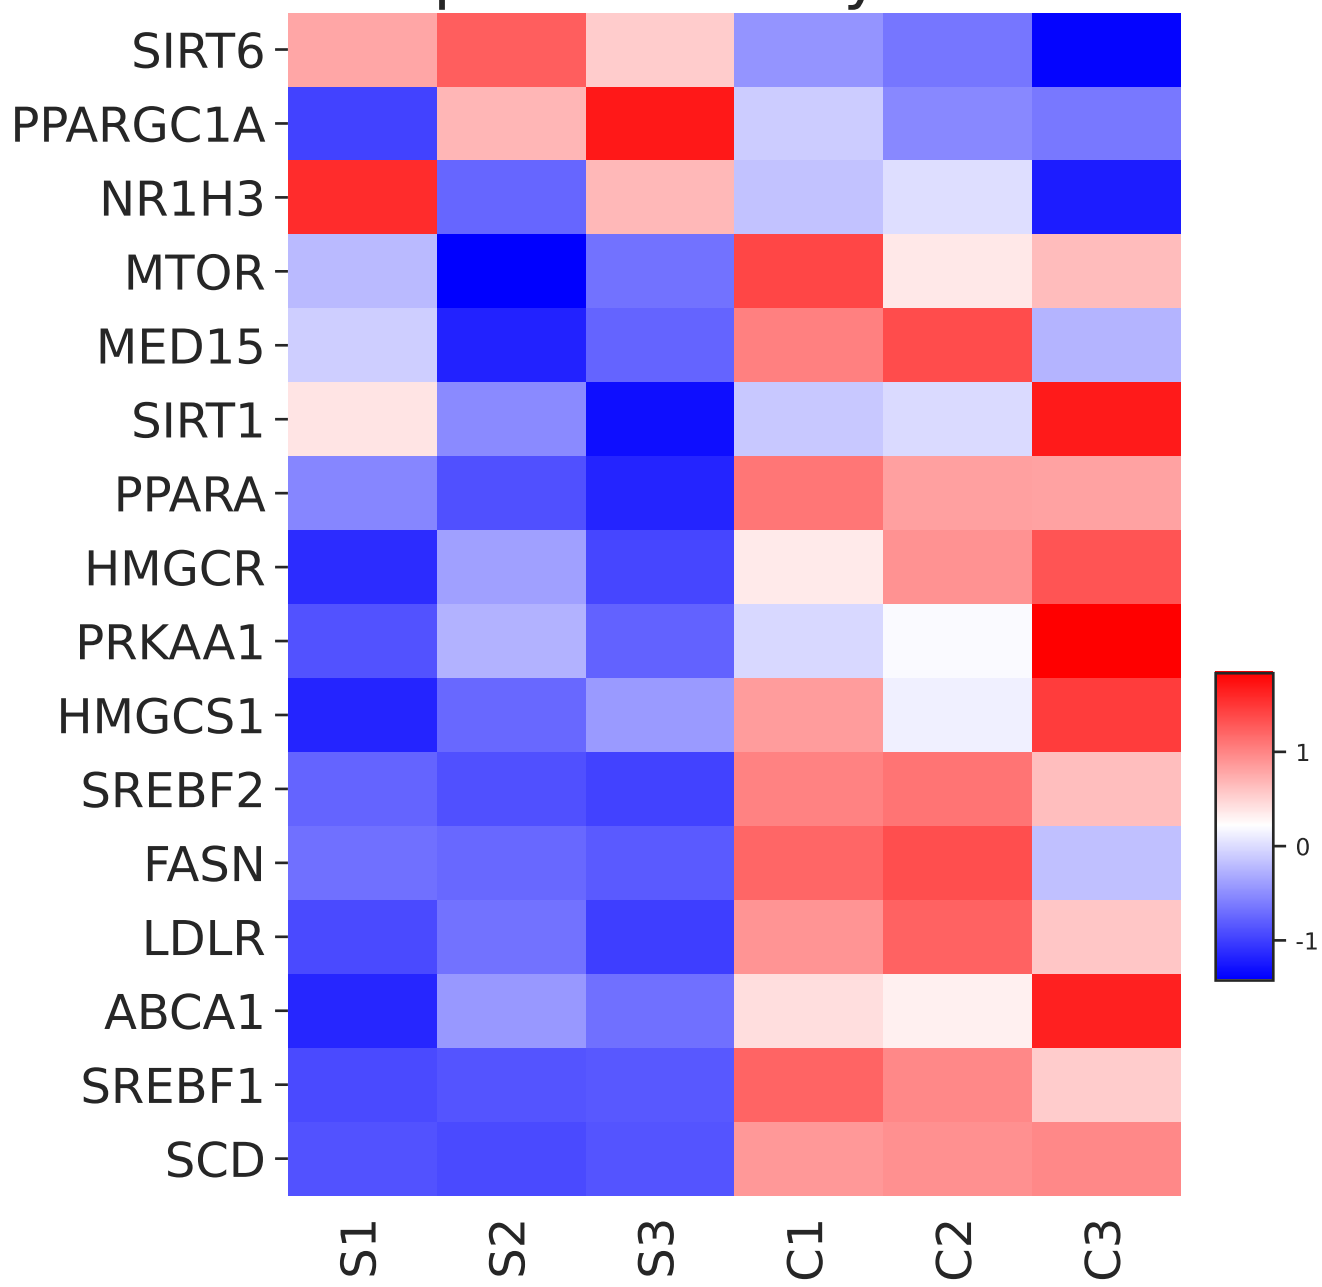

Supplement: Supplementary file 494 [file 520_SREBF and miR33 in cholesterol and lipid homeostasis(WP2011).heatmap.pdf › Source data/1.RNA-Seq source data/2.HUVECs/result/1.6.GSEA/S-vs-C/wiki/520_SREBF and miR33 in cholesterol and lipid homeostasis(WP2011).heatmap.pdf]

# Cholesterol biosynthesis pathway(WP197)

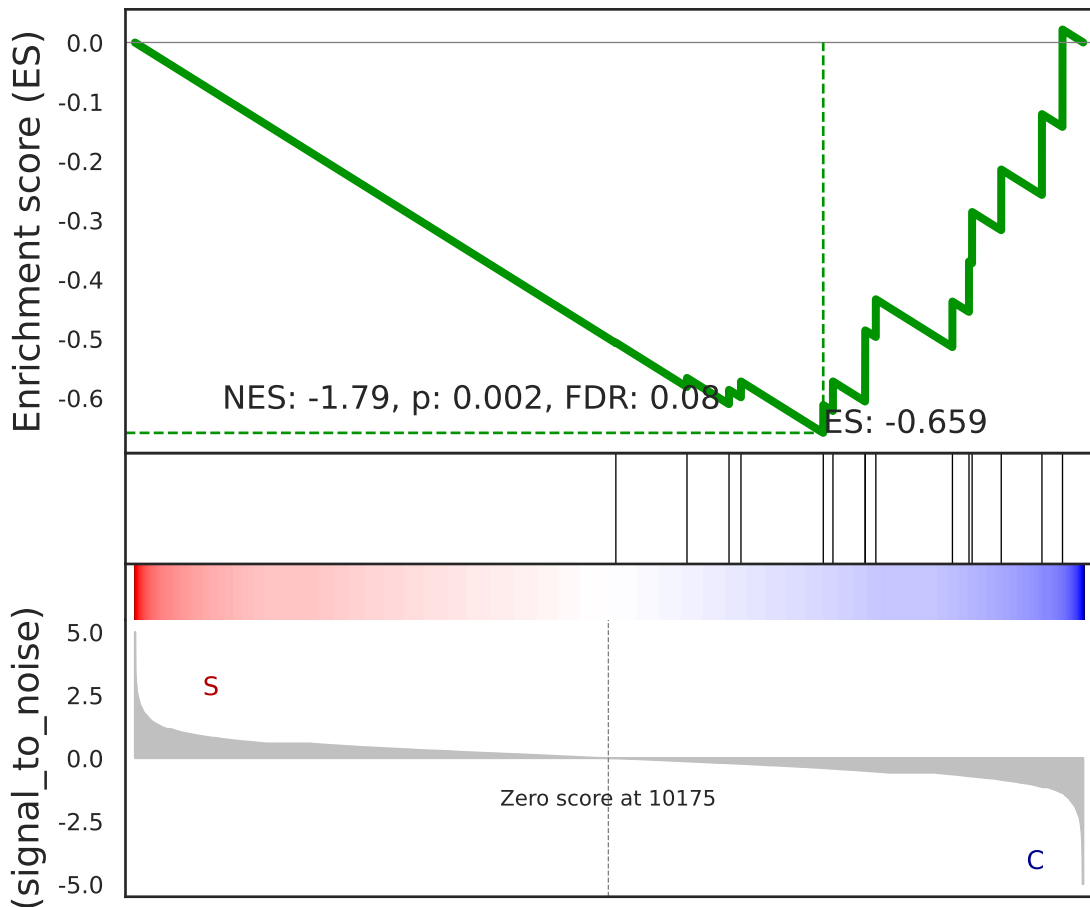

Supplement: Supplementary file 495 [file 521_Cholesterol biosynthesis pathway(WP197).gsea.pdf › Source data/1.RNA-Seq source data/2.HUVECs/result/1.6.GSEA/S-vs-C/wiki/521_Cholesterol biosynthesis pathway(WP197).gsea.pdf]

# Cholesterol biosynthesis pathway(WP197)

## Heatmap of the Analyzed GeneSet

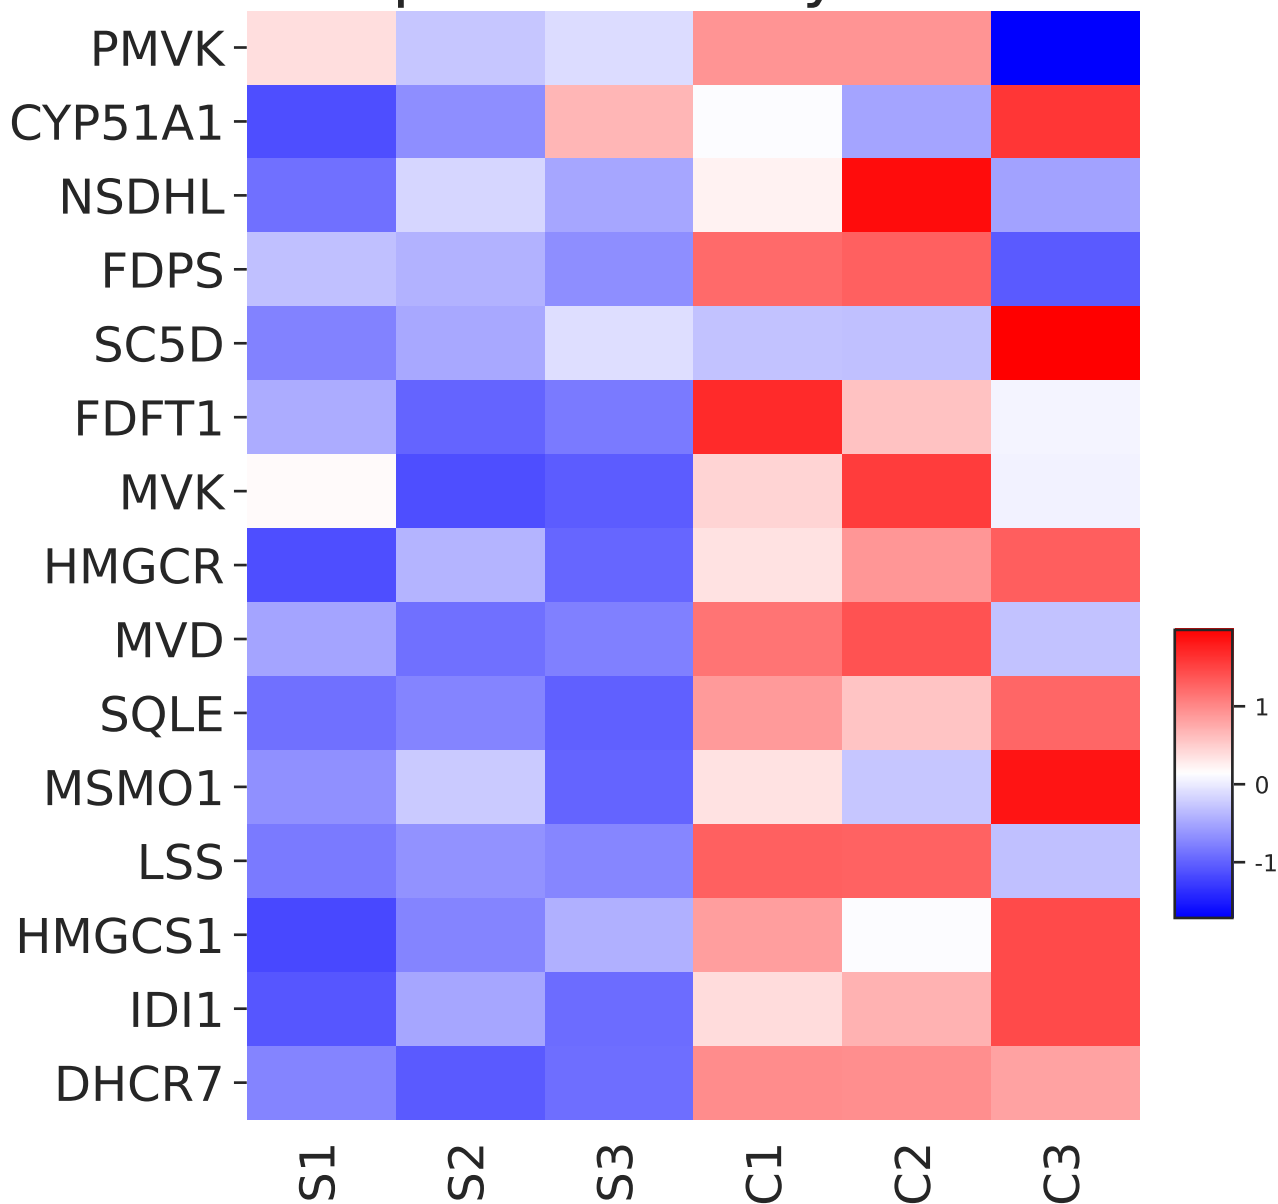

Supplement: Supplementary file 496 [file 521_Cholesterol biosynthesis pathway(WP197).heatmap.pdf › Source data/1.RNA-Seq source data/2.HUVECs/result/1.6.GSEA/S-vs-C/wiki/521_Cholesterol biosynthesis pathway(WP197).heatmap.pdf]

# Statin inhibition of cholesterol production(WP430)

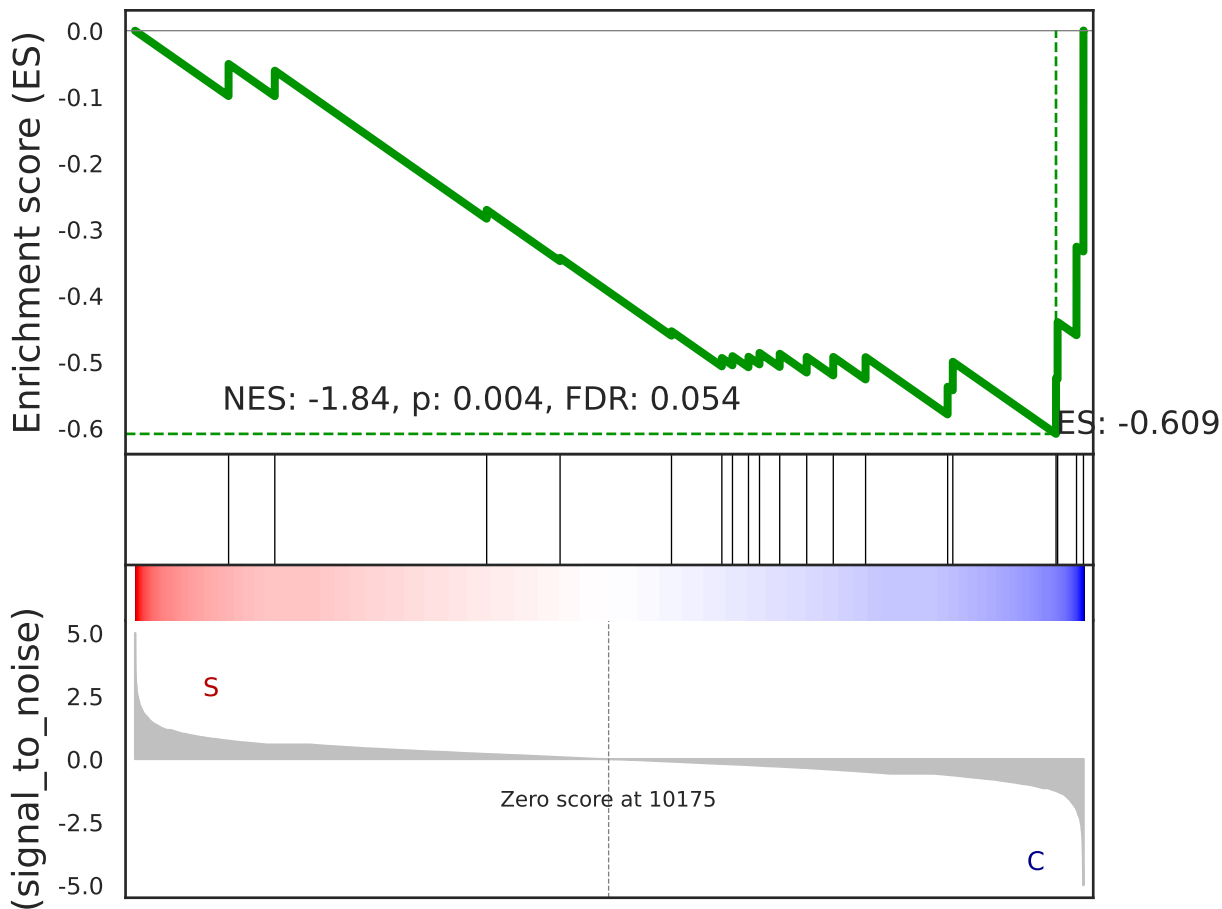

Supplement: Supplementary file 497 [file 522_Statin inhibition of cholesterol production(WP430).gsea.pdf › Source data/1.RNA-Seq source data/2.HUVECs/result/1.6.GSEA/S-vs-C/wiki/522_Statin inhibition of cholesterol production(WP430).gsea.pdf]

# Statin inhibition of cholesterol production(WP430)

## Heatmap of the Analyzed GeneSet

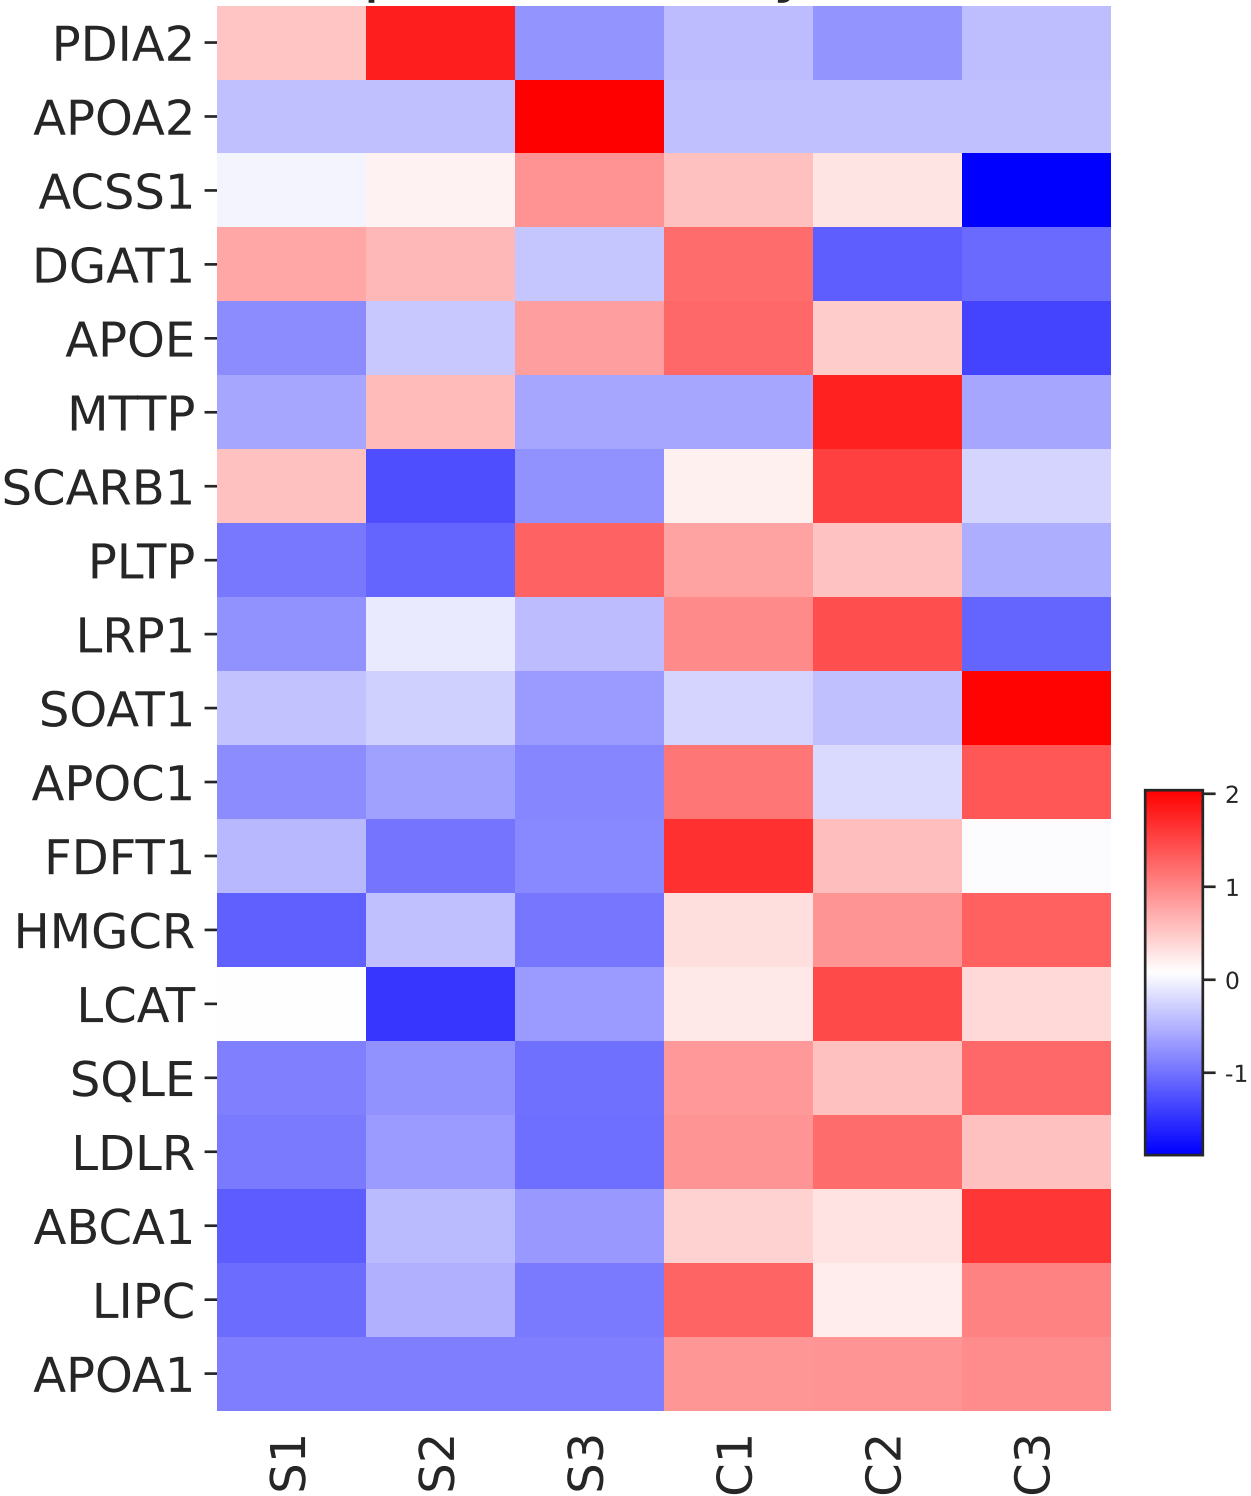

Supplement: Supplementary file 498 [file 522_Statin inhibition of cholesterol production(WP430).heatmap.pdf › Source data/1.RNA-Seq source data/2.HUVECs/result/1.6.GSEA/S-vs-C/wiki/522_Statin inhibition of cholesterol production(WP430).heatmap.pdf]

# Cholesterol metabolism(WP5304)

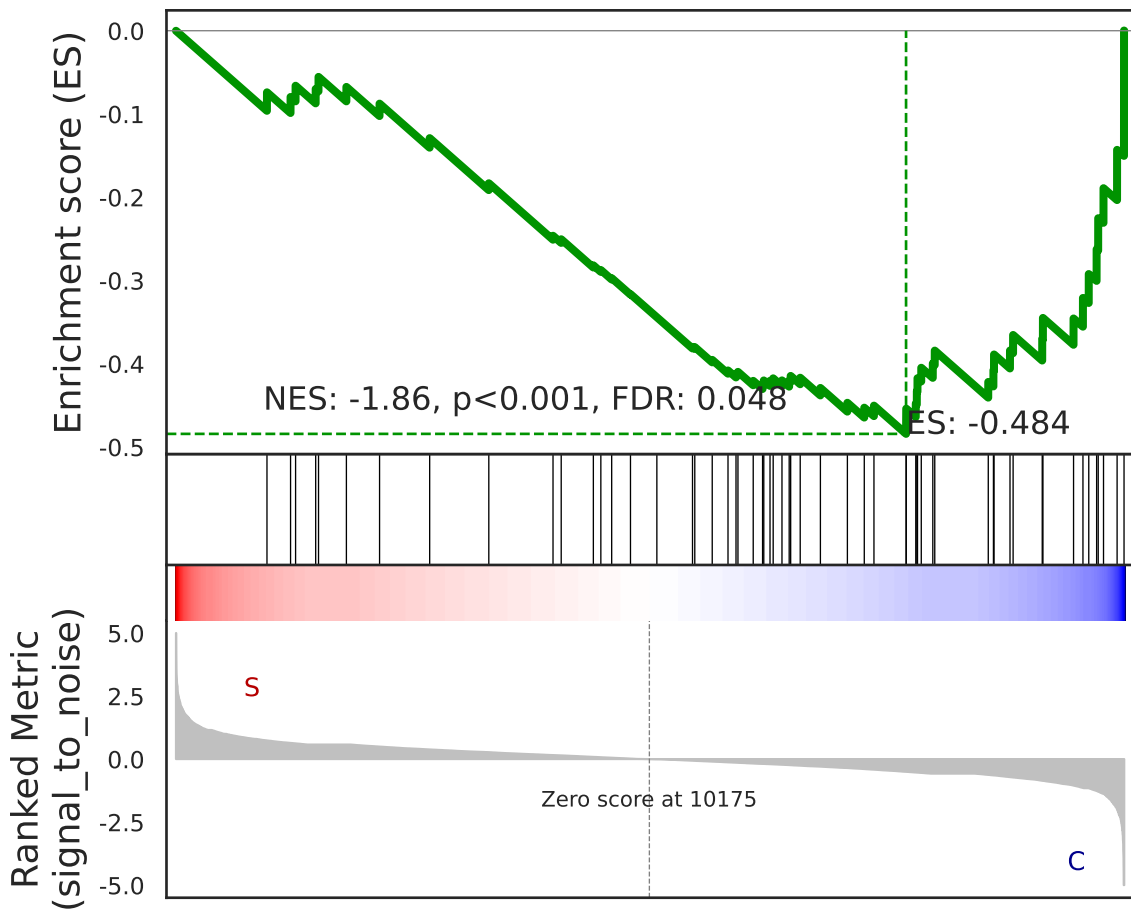

Supplement: Supplementary file 499 [file 523_Cholesterol metabolism(WP5304).gsea.pdf › Source data/1.RNA-Seq source data/2.HUVECs/result/1.6.GSEA/S-vs-C/wiki/523_Cholesterol metabolism(WP5304).gsea.pdf]

Cholesterol metabolism(WP5304)  
Heatmap of the Analyzed GeneSet

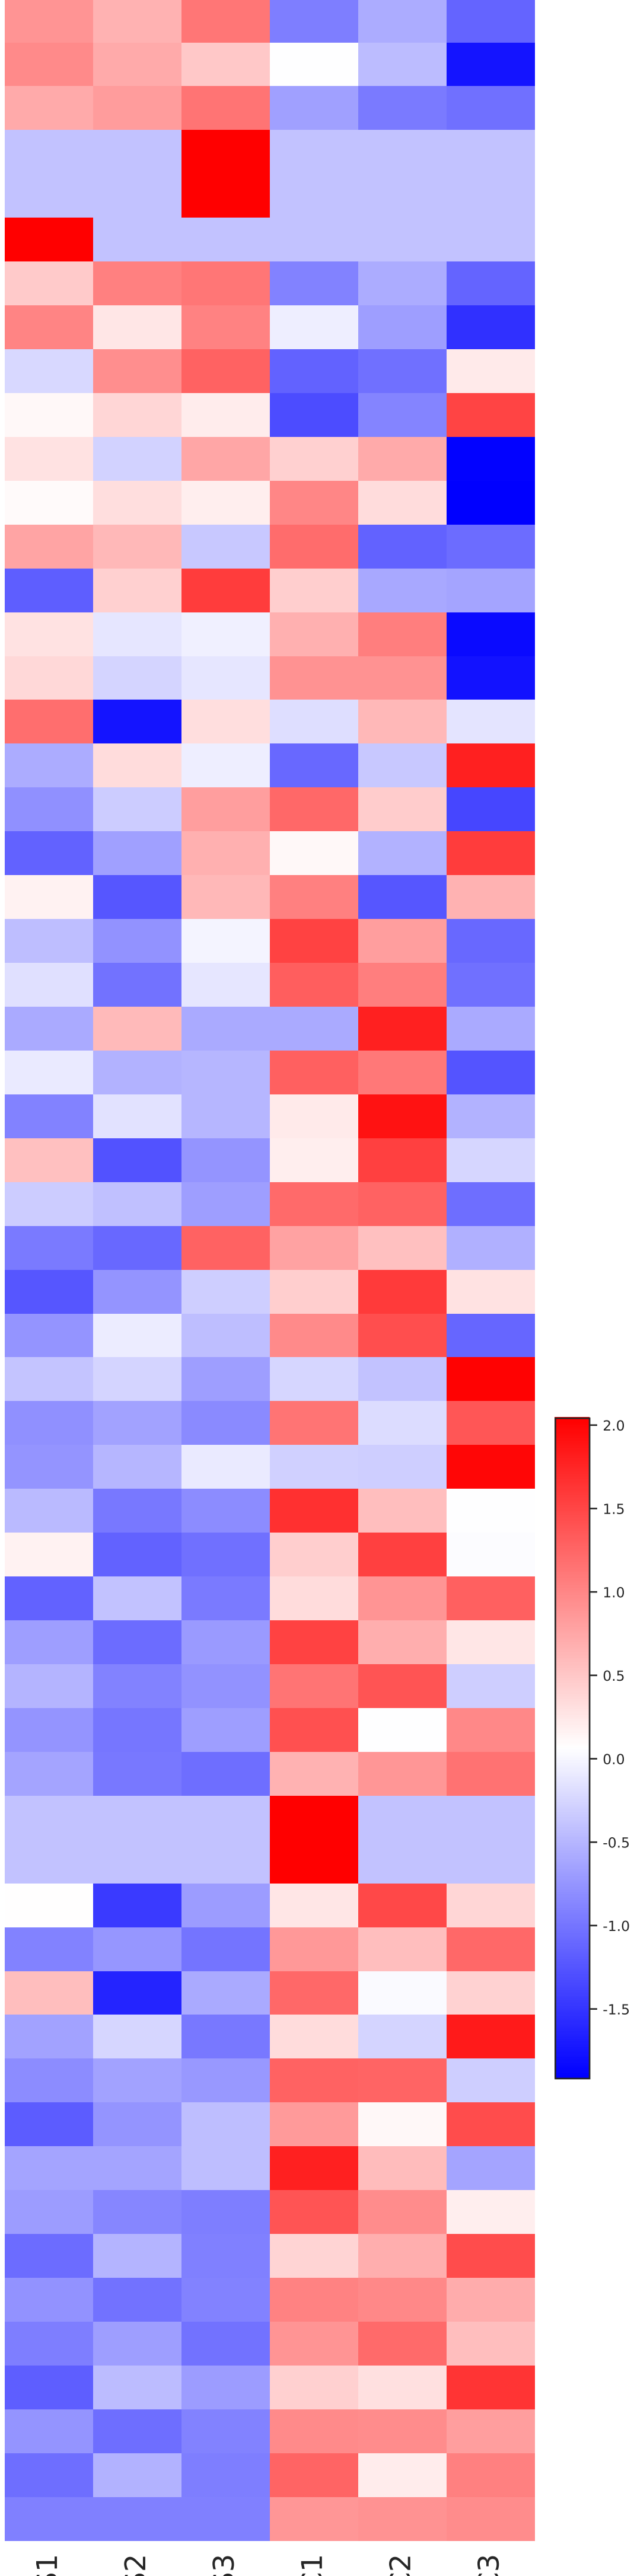

Supplement: Supplementary file 500 [file 523_Cholesterol metabolism(WP5304).heatmap.pdf › Source data/1.RNA-Seq source data/2.HUVECs/result/1.6.GSEA/S-vs-C/wiki/523_Cholesterol metabolism(WP5304).heatmap.pdf]

# Pregnane X receptor pathway(WP2876)

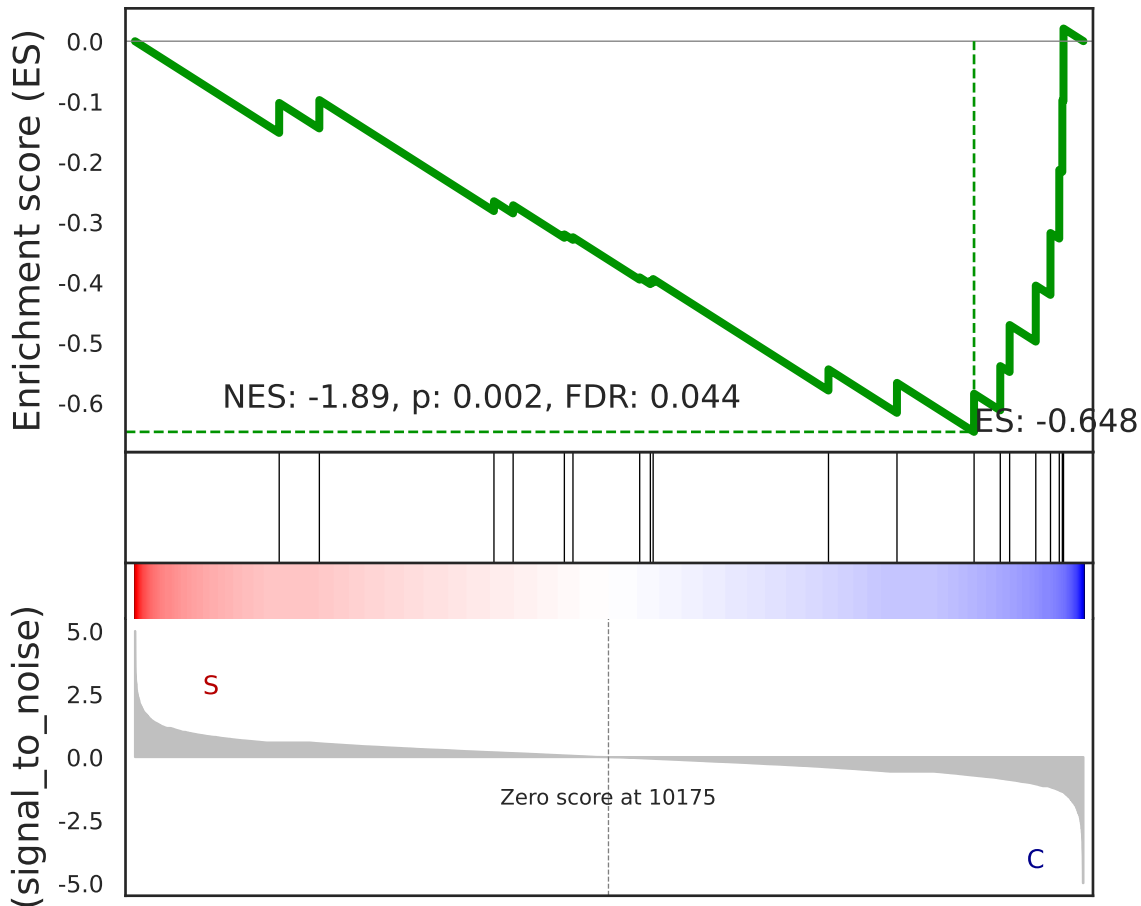

Supplement: Supplementary file 501 [file 524_Pregnane X receptor pathway(WP2876).gsea.pdf › Source data/1.RNA-Seq source data/2.HUVECs/result/1.6.GSEA/S-vs-C/wiki/524_Pregnane X receptor pathway(WP2876).gsea.pdf]

# Pregnane X receptor pathway(WP2876)

## Heatmap of the Analyzed GeneSet

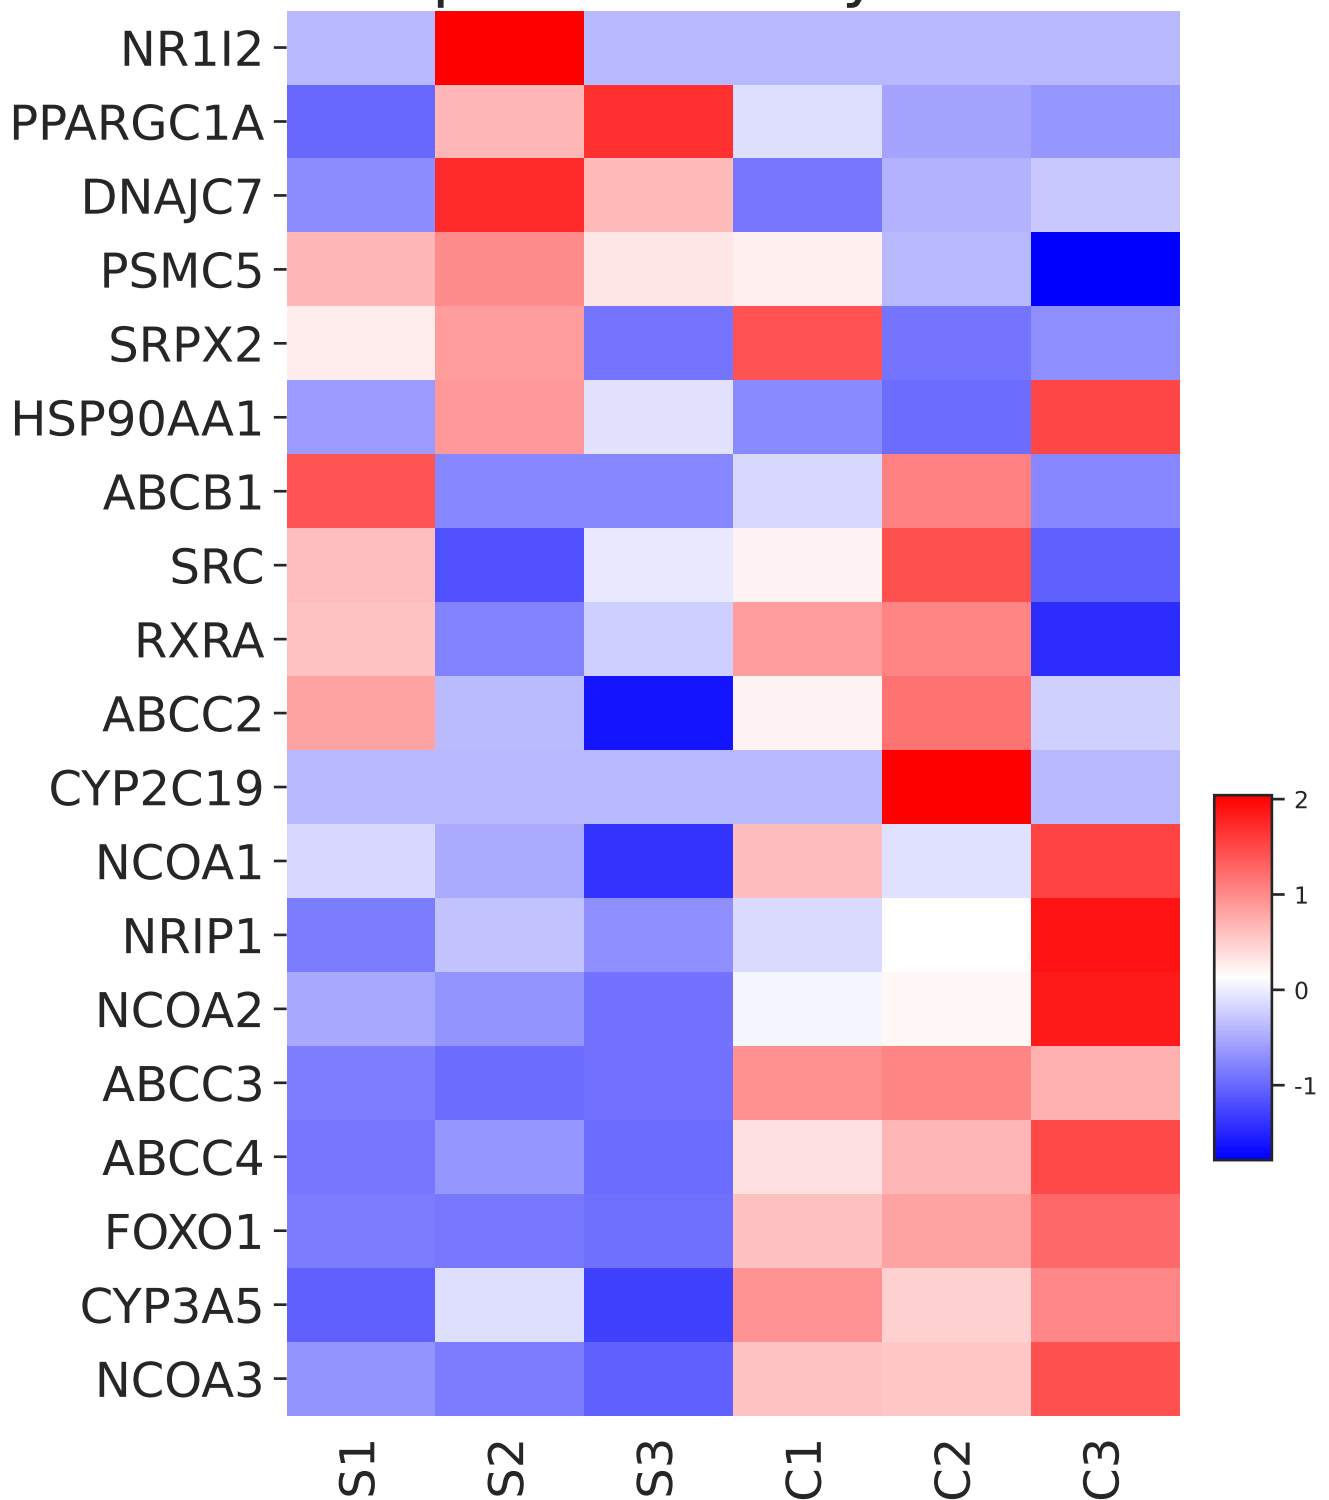

Supplement: Supplementary file 502 [file 524_Pregnane X receptor pathway(WP2876).heatmap.pdf › Source data/1.RNA-Seq source data/2.HUVECs/result/1.6.GSEA/S-vs-C/wiki/524_Pregnane X receptor pathway(WP2876).heatmap.pdf]

# Cholesterol synthesis disorders(WP5193)

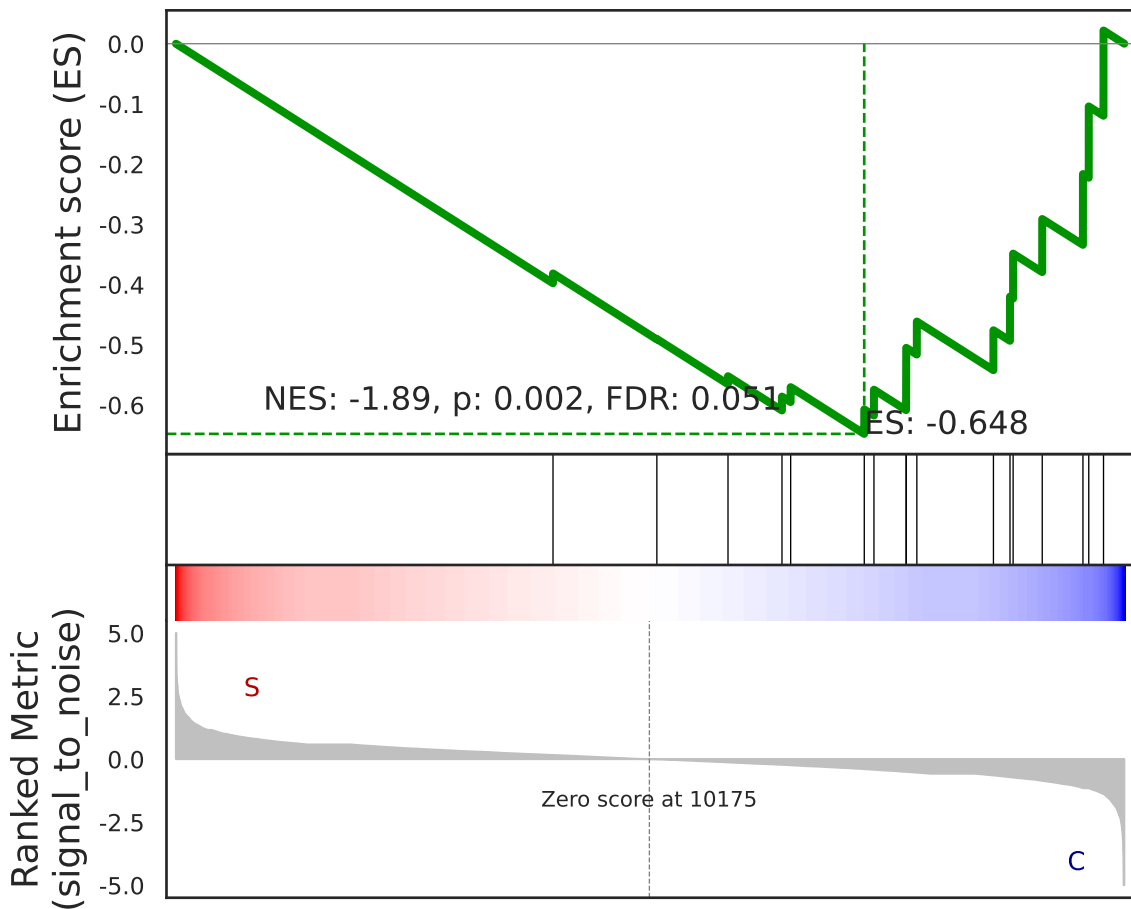

Supplement: Supplementary file 503 [file 525_Cholesterol synthesis disorders(WP5193).gsea.pdf › Source data/1.RNA-Seq source data/2.HUVECs/result/1.6.GSEA/S-vs-C/wiki/525_Cholesterol synthesis disorders(WP5193).gsea.pdf]

# Cholesterol synthesis disorders(WP5193)

## Heatmap of the Analyzed GeneSet

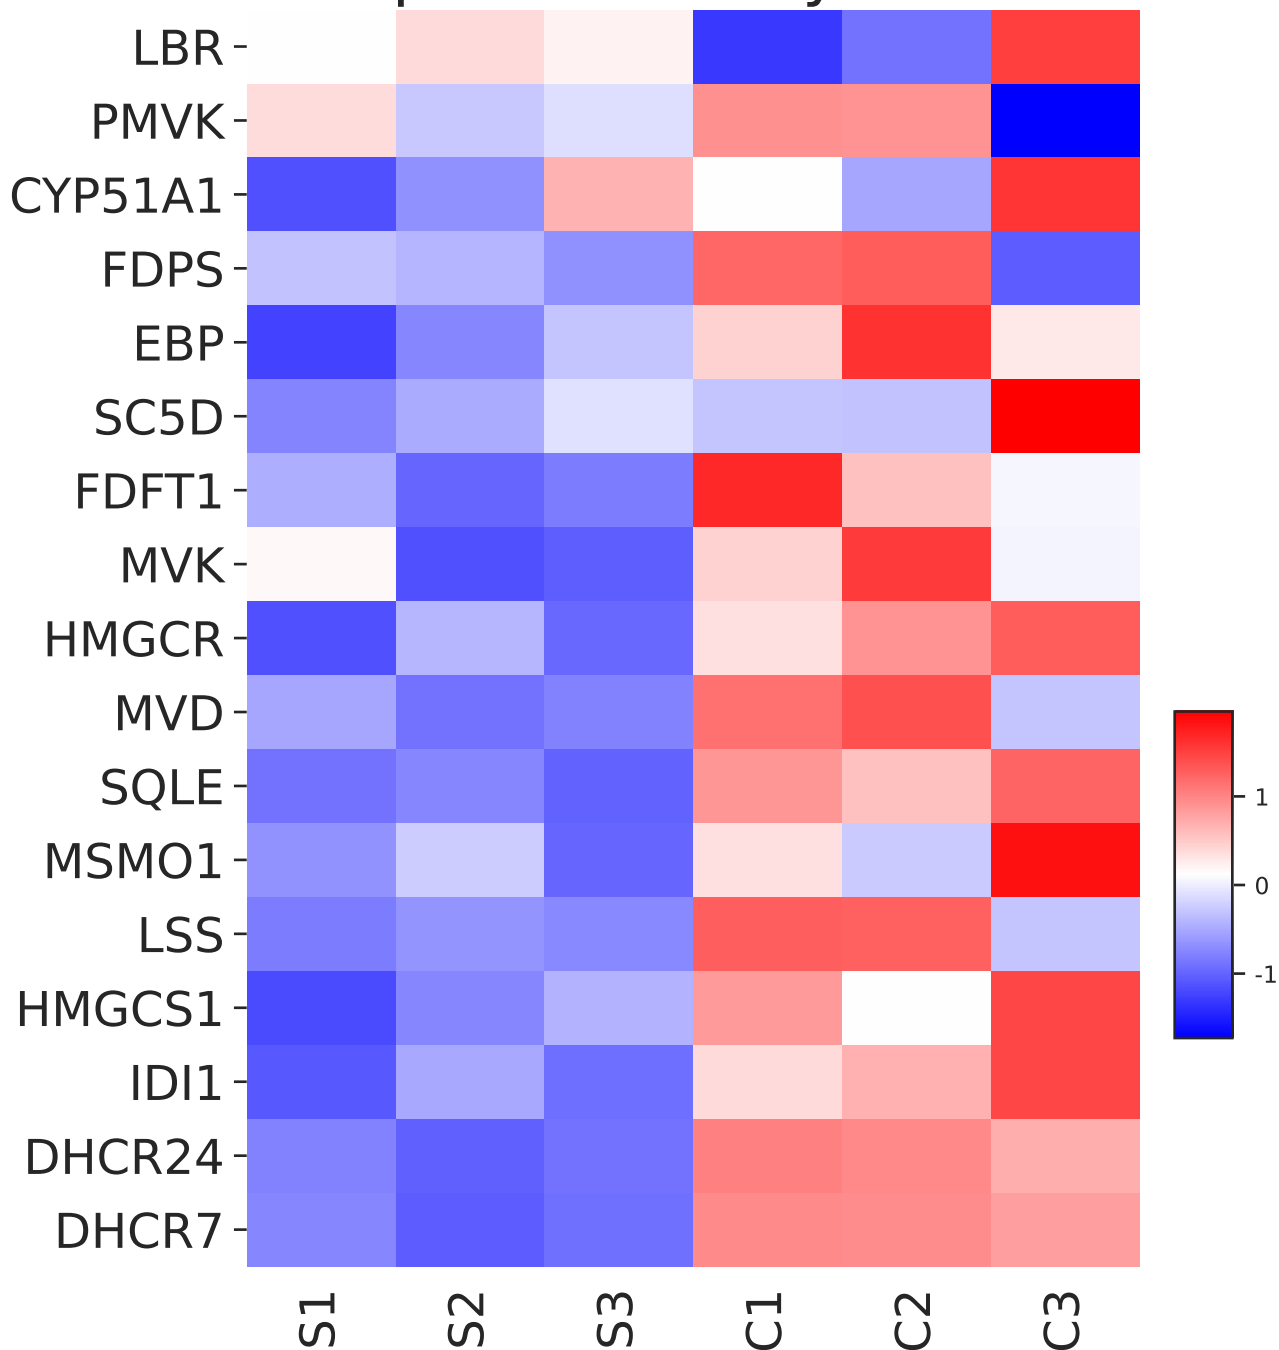

Supplement: Supplementary file 504 [file 525_Cholesterol synthesis disorders(WP5193).heatmap.pdf › Source data/1.RNA-Seq source data/2.HUVECs/result/1.6.GSEA/S-vs-C/wiki/525_Cholesterol synthesis disorders(WP5193).heatmap.pdf]

Cholesterol metabolism with Bloch and Kandutsch-Russell p... (WP4718)

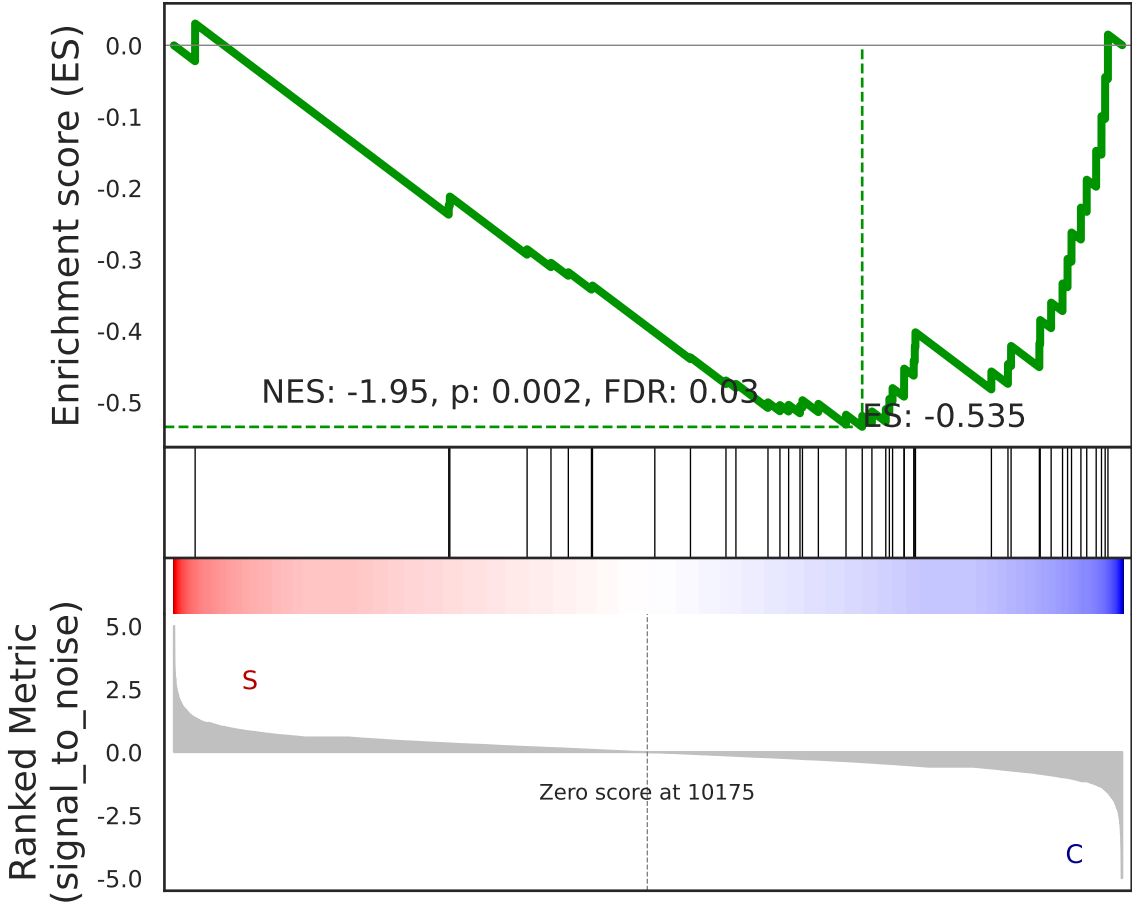

Supplement: Supplementary file 505 [file 526_Cholesterol metabolism with Bloch and Kandutsch-Russell p...(WP4718).gsea.pdf › Source data/1.RNA-Seq source data/2.HUVECs/result/1.6.GSEA/S-vs-C/wiki/526_Cholesterol metabolism with Bloch and Kandutsch-Russell p...(WP4718).gsea.pdf]

Cholesterol metabolism with Bloch and Kandutsch-Russell p...(WP4718)

Heatmap of the Analyzed GeneSet

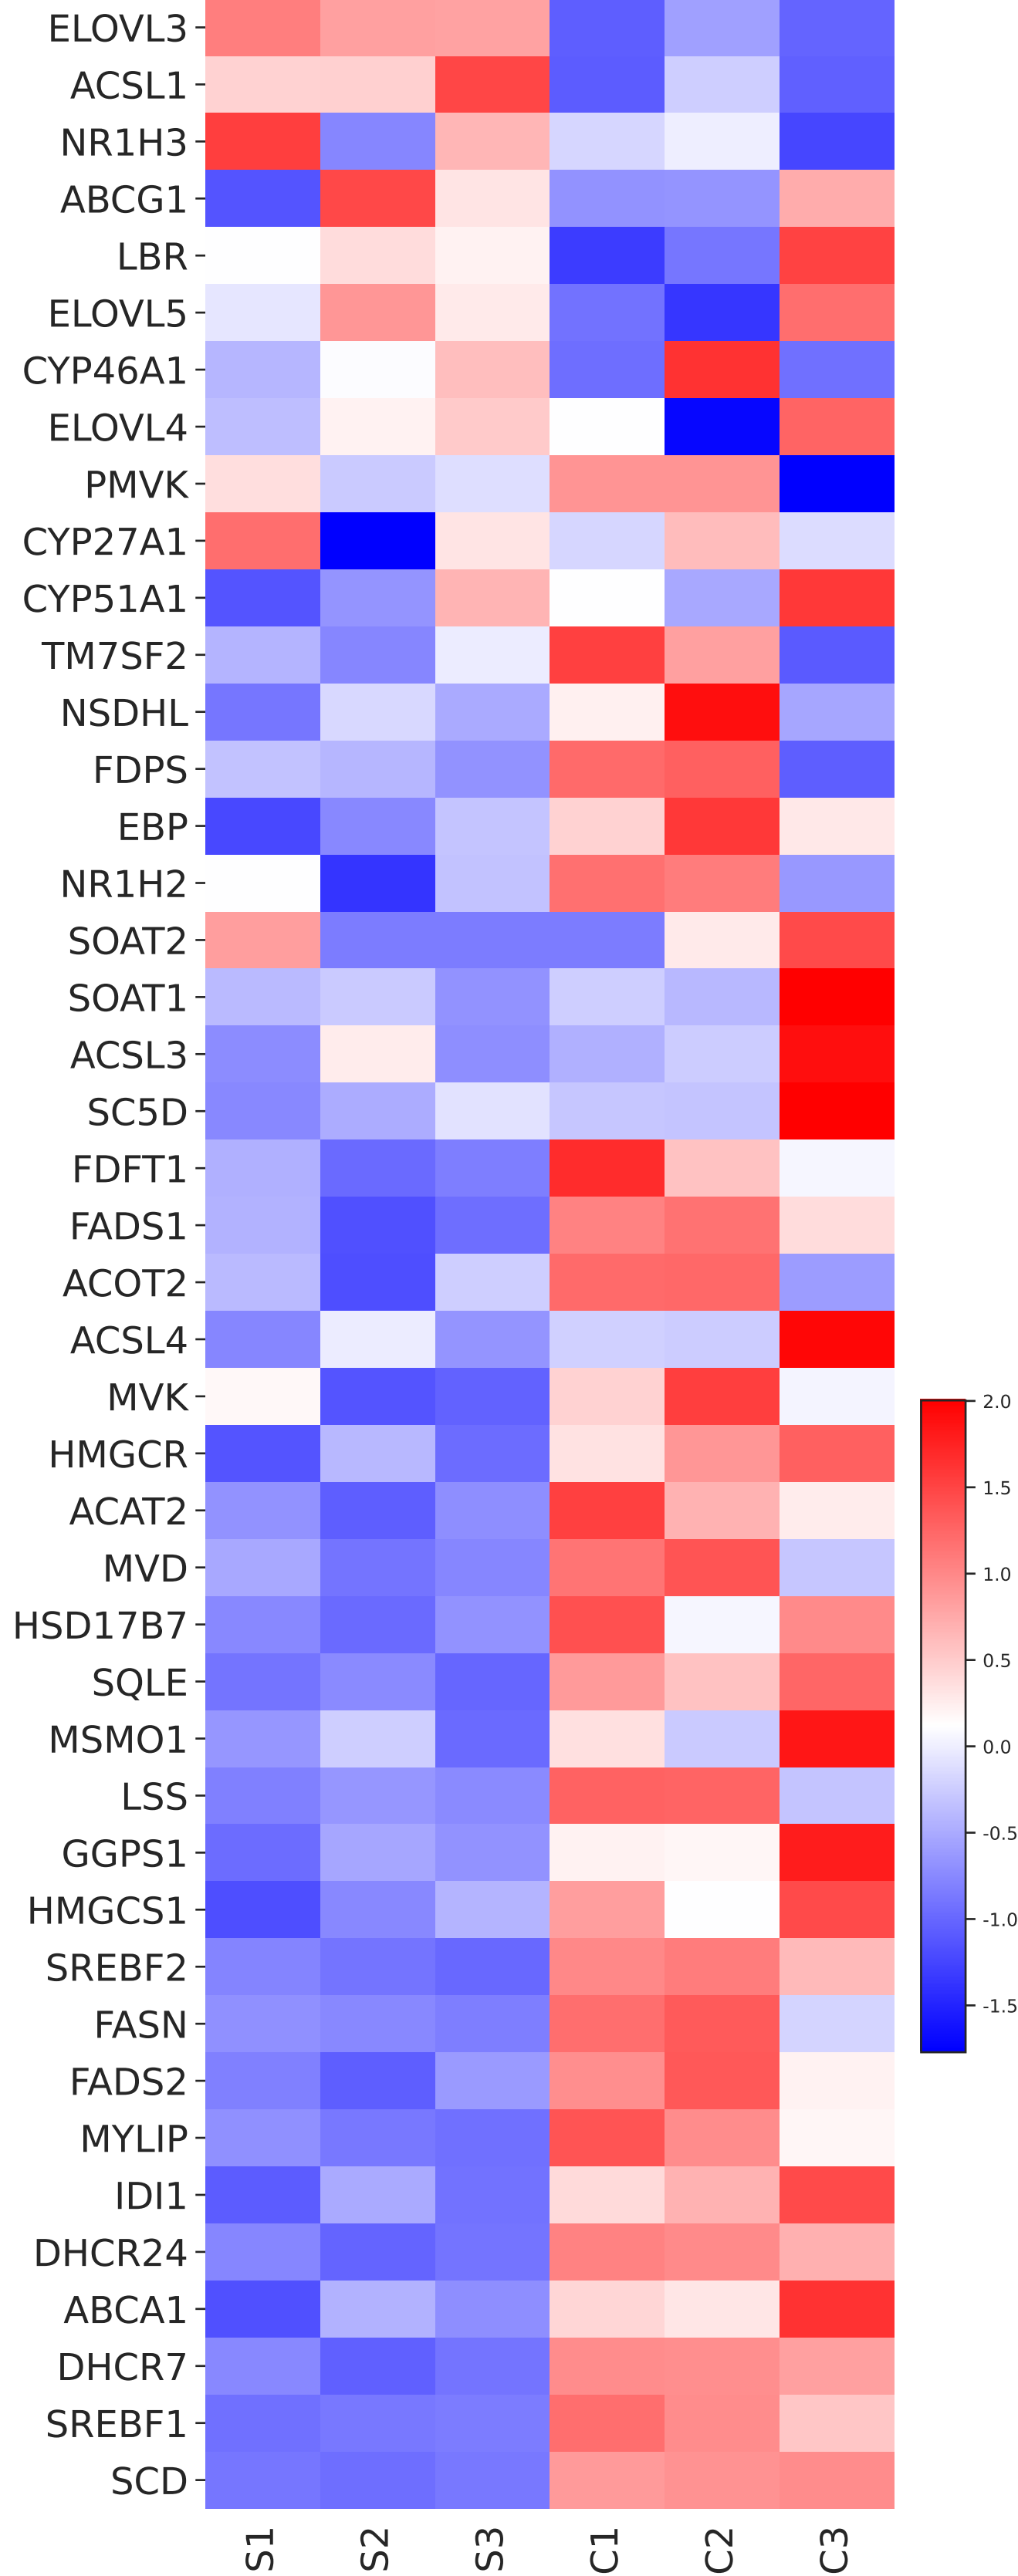

Supplement: Supplementary file 506 [file 526_Cholesterol metabolism with Bloch and Kandutsch-Russell p...(WP4718).heatmap.pdf › Source data/1.RNA-Seq source data/2.HUVECs/result/1.6.GSEA/S-vs-C/wiki/526_Cholesterol metabolism with Bloch and Kandutsch-Russell p...(WP4718).heatmap.pdf]

# Enterocyte cholesterol metabolism(WP5333)

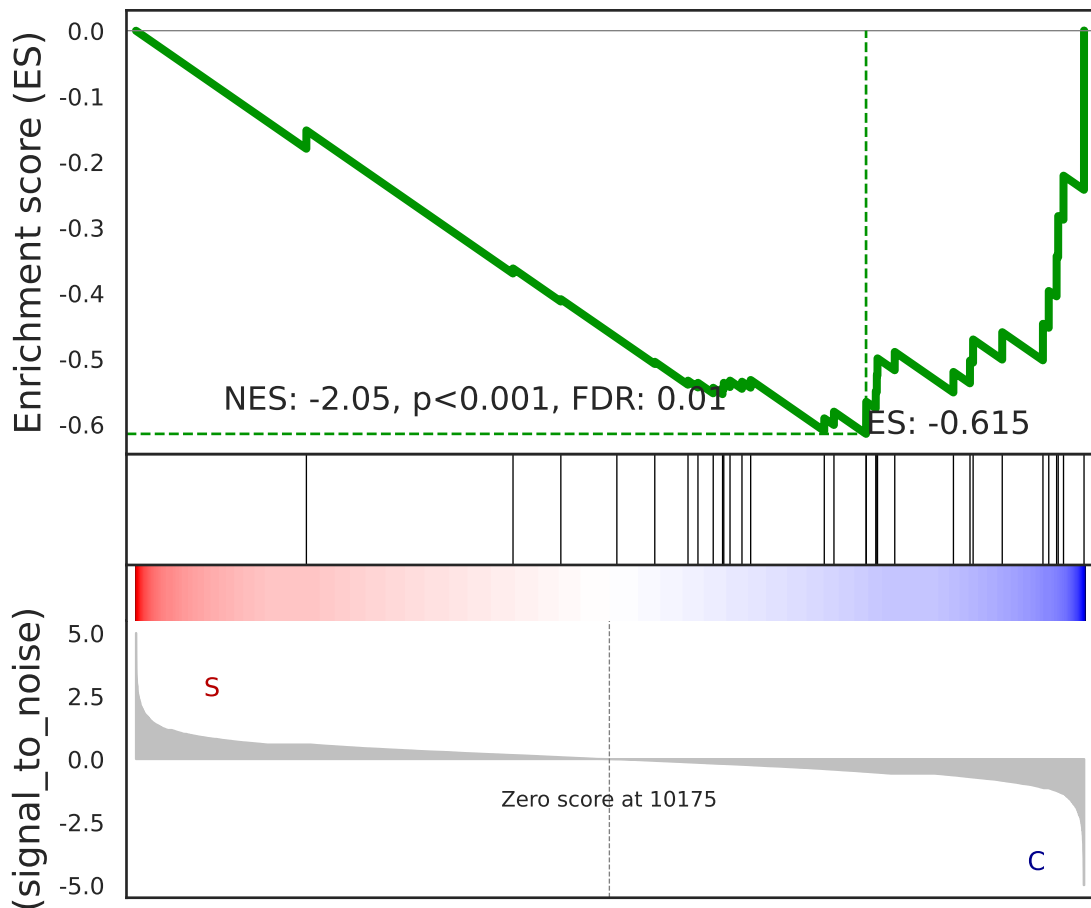

Supplement: Supplementary file 507 [file 527_Enterocyte cholesterol metabolism(WP5333).gsea.pdf › Source data/1.RNA-Seq source data/2.HUVECs/result/1.6.GSEA/S-vs-C/wiki/527_Enterocyte cholesterol metabolism(WP5333).gsea.pdf]

# Enterocyte cholesterol metabolism(WP5333)

## Heatmap of the Analyzed GeneSet

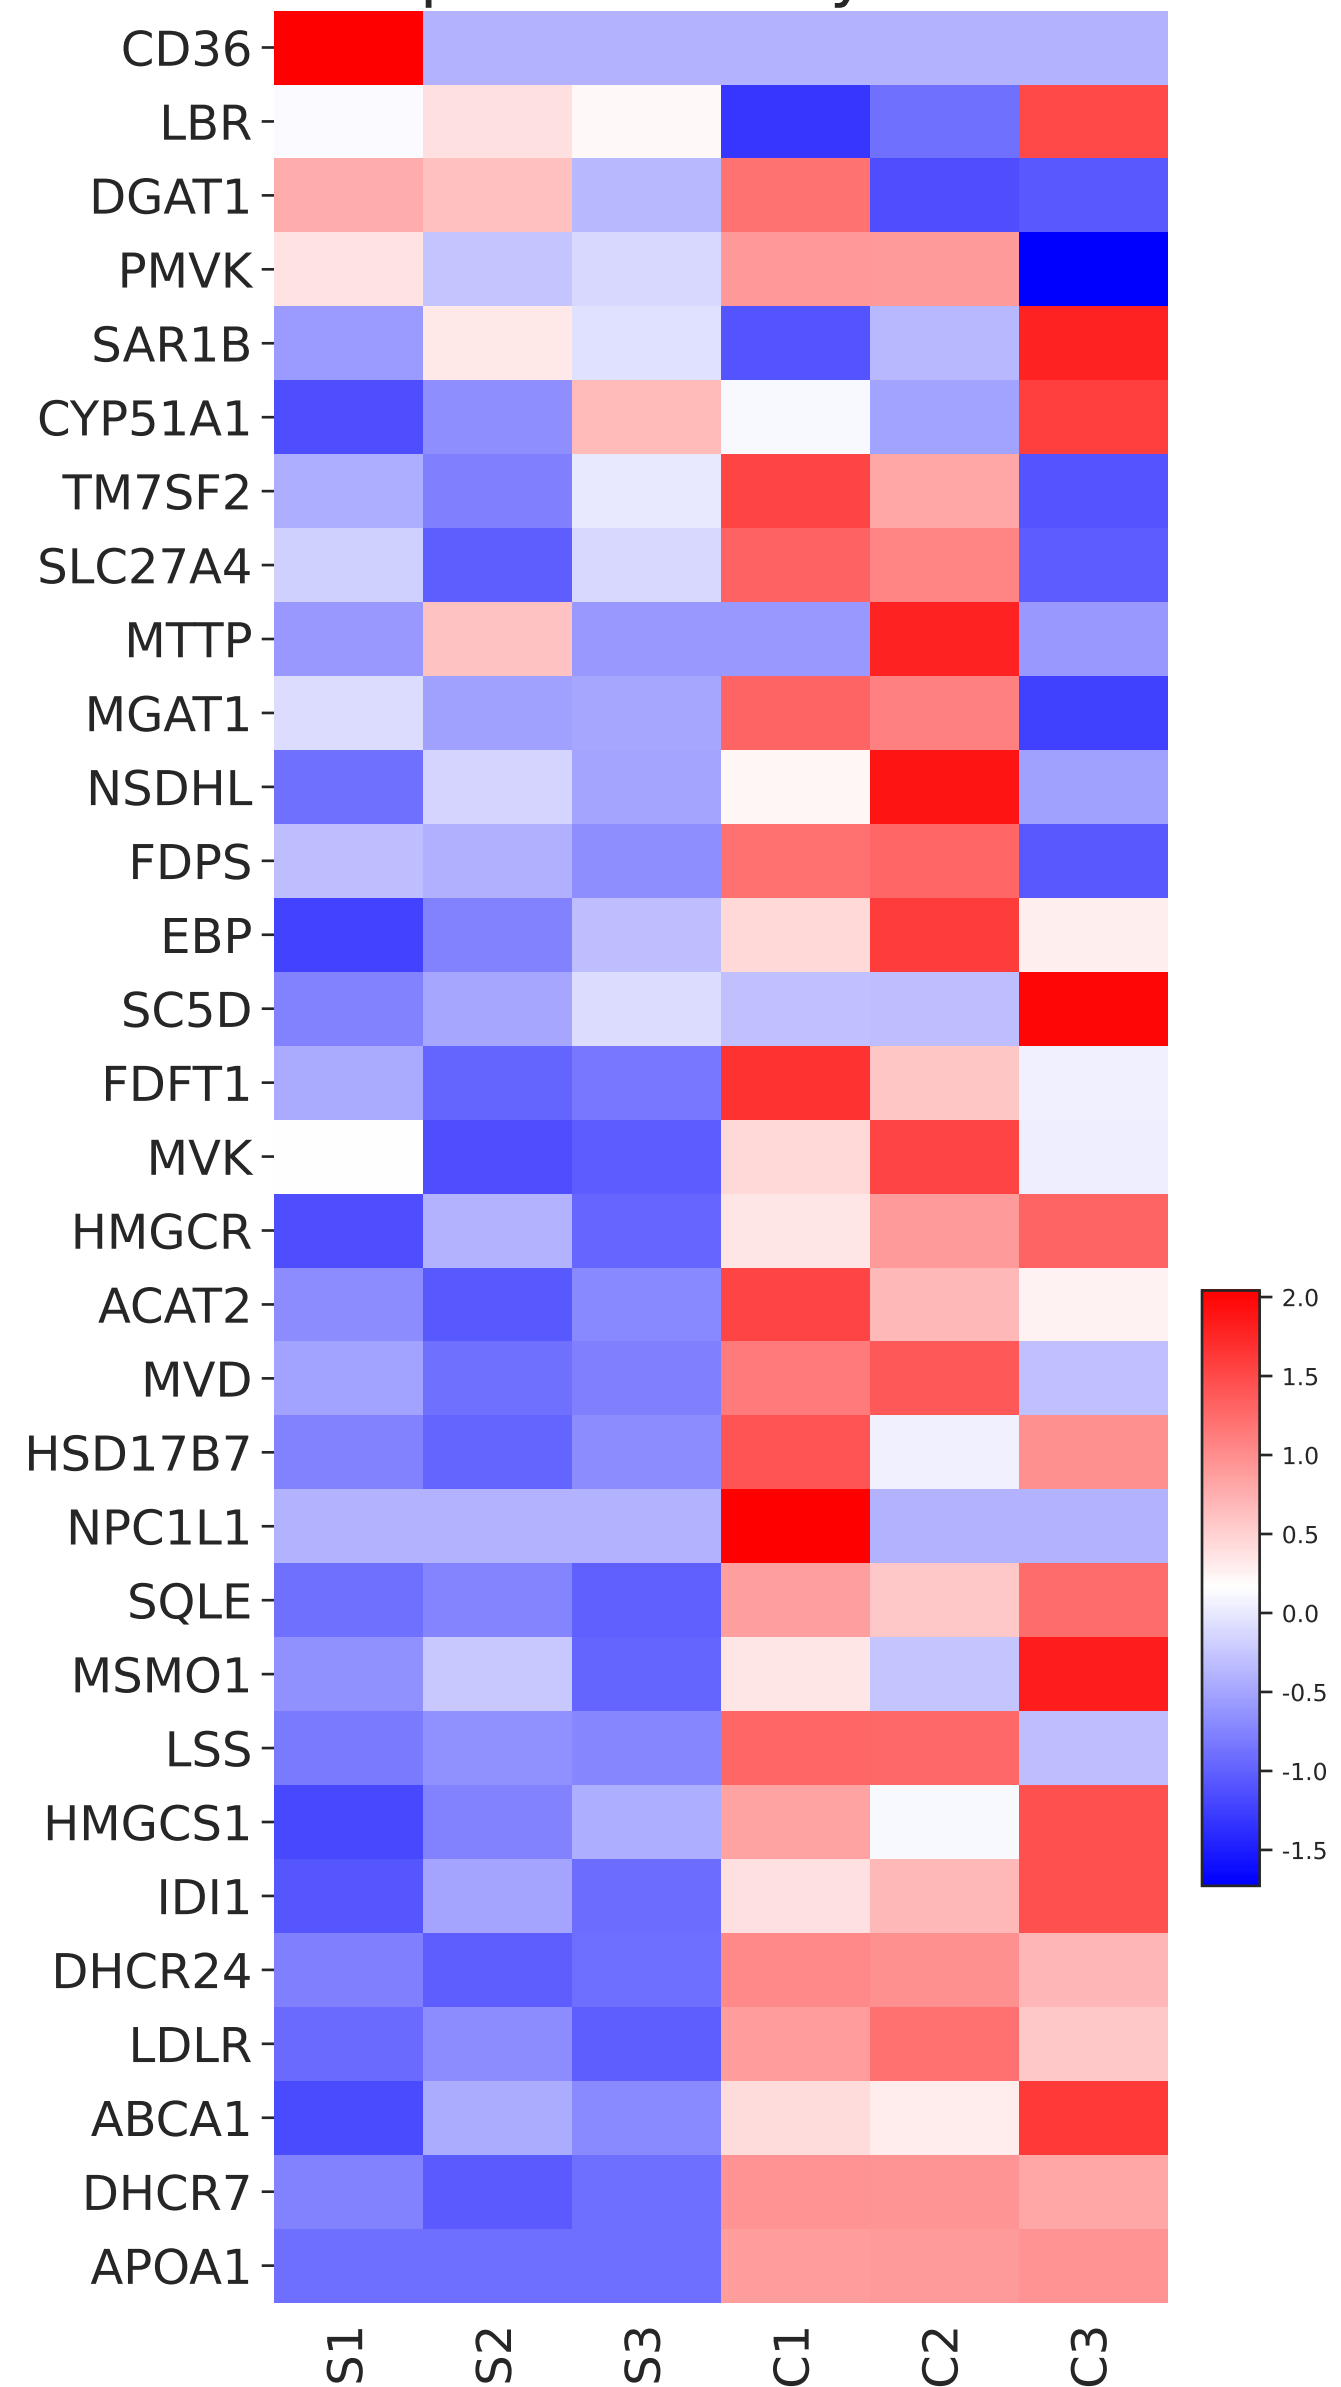

Supplement: Supplementary file 508 [file 527_Enterocyte cholesterol metabolism(WP5333).heatmap.pdf › Source data/1.RNA-Seq source data/2.HUVECs/result/1.6.GSEA/S-vs-C/wiki/527_Enterocyte cholesterol metabolism(WP5333).heatmap.pdf]

# miRNA targets in ECM and membrane receptors(WP2911)

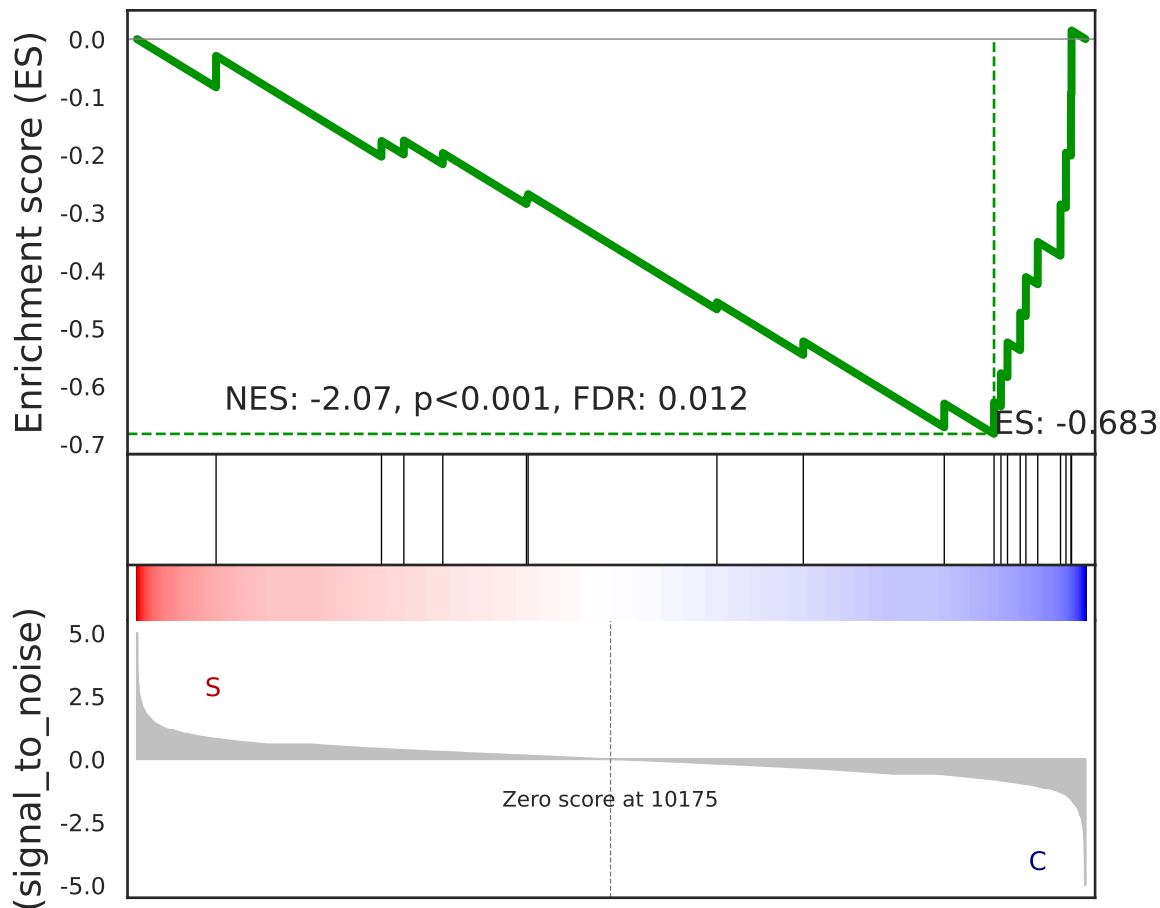

Supplement: Supplementary file 509 [file 528_miRNA targets in ECM and membrane receptors(WP2911).gsea.pdf › Source data/1.RNA-Seq source data/2.HUVECs/result/1.6.GSEA/S-vs-C/wiki/528_miRNA targets in ECM and membrane receptors(WP2911).gsea.pdf]

miRNA targets in ECM and membrane receptors(WP2911)  
Heatmap of the Analyzed GeneSet

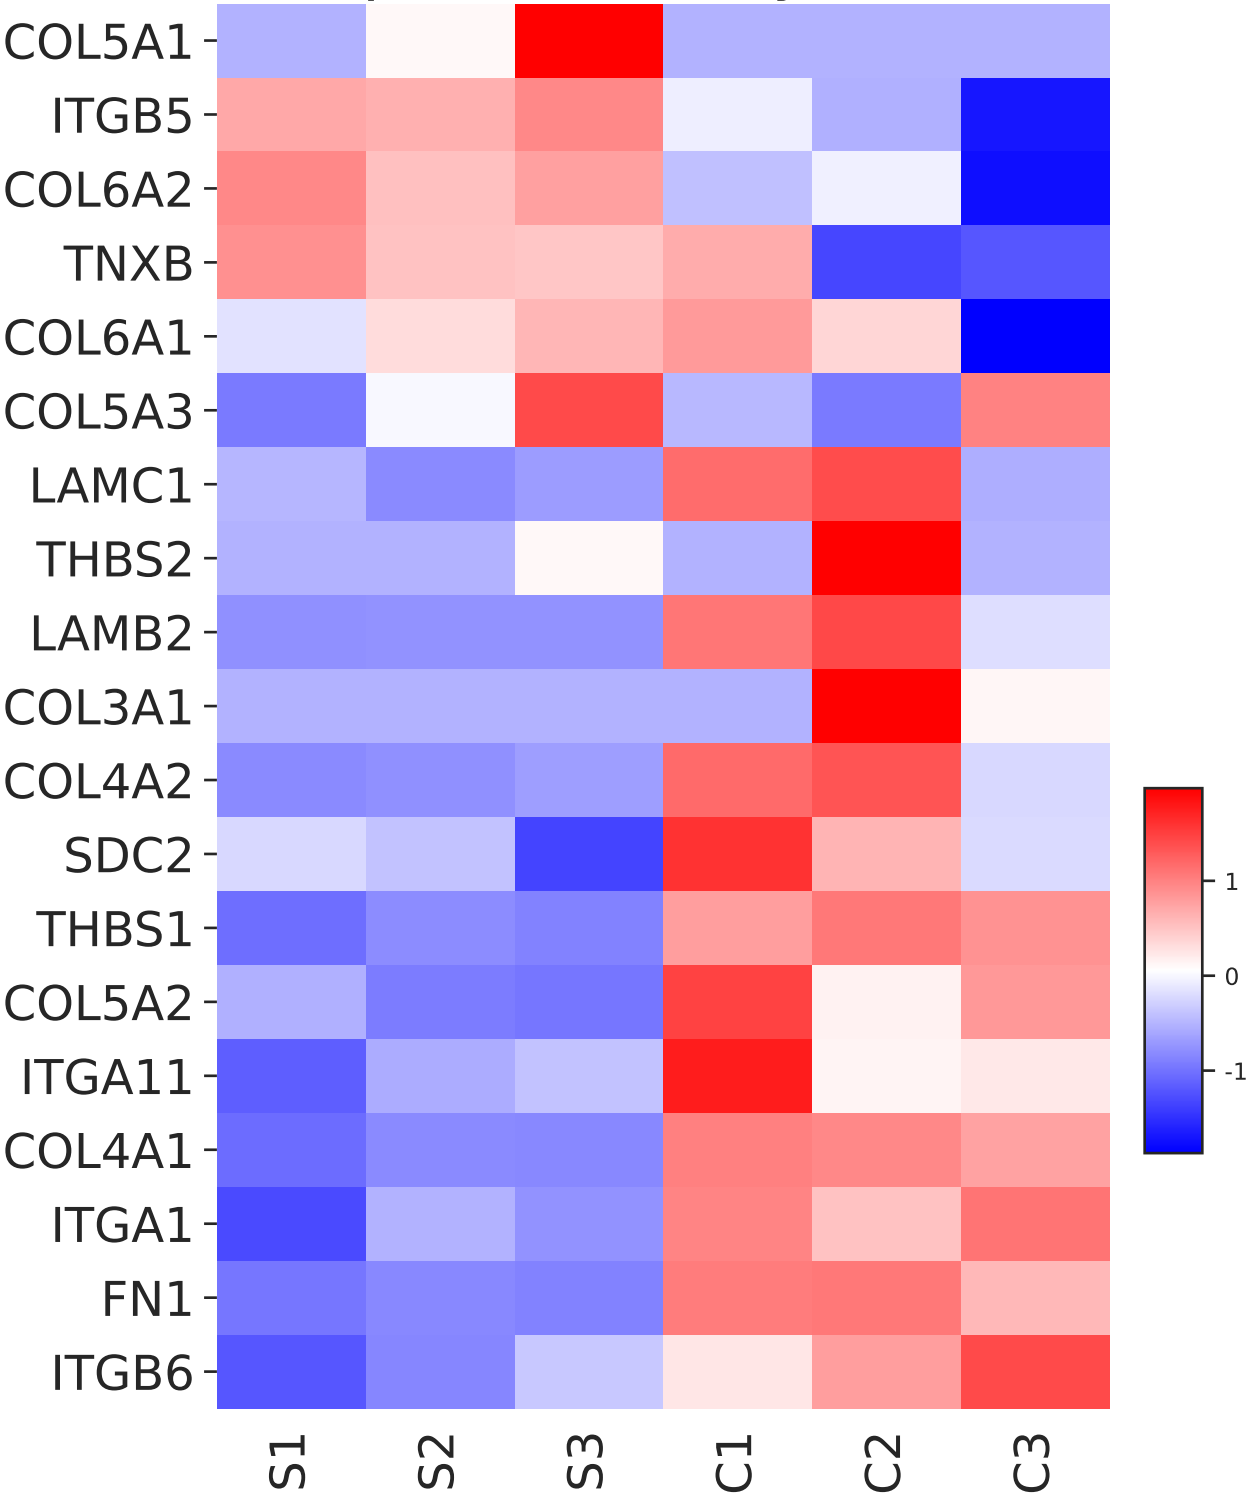

Supplement: Supplementary file 510 [file 528_miRNA targets in ECM and membrane receptors(WP2911).heatmap.pdf › Source data/1.RNA-Seq source data/2.HUVECs/result/1.6.GSEA/S-vs-C/wiki/528_miRNA targets in ECM and membrane receptors(WP2911).heatmap.pdf]
