# Supplementary figures and images for: Peptide-based Self-adaptive Implant Coating Sequentially Regulates Bone Regeneration to Enhance Interfacial Osseointegration (part 6 of 6)
Source: Research Square preprint supplement (doi:10.21203/rs.3.rs-5132912/v1), 2024-10-01

# One-carbon metabolism(WP241)

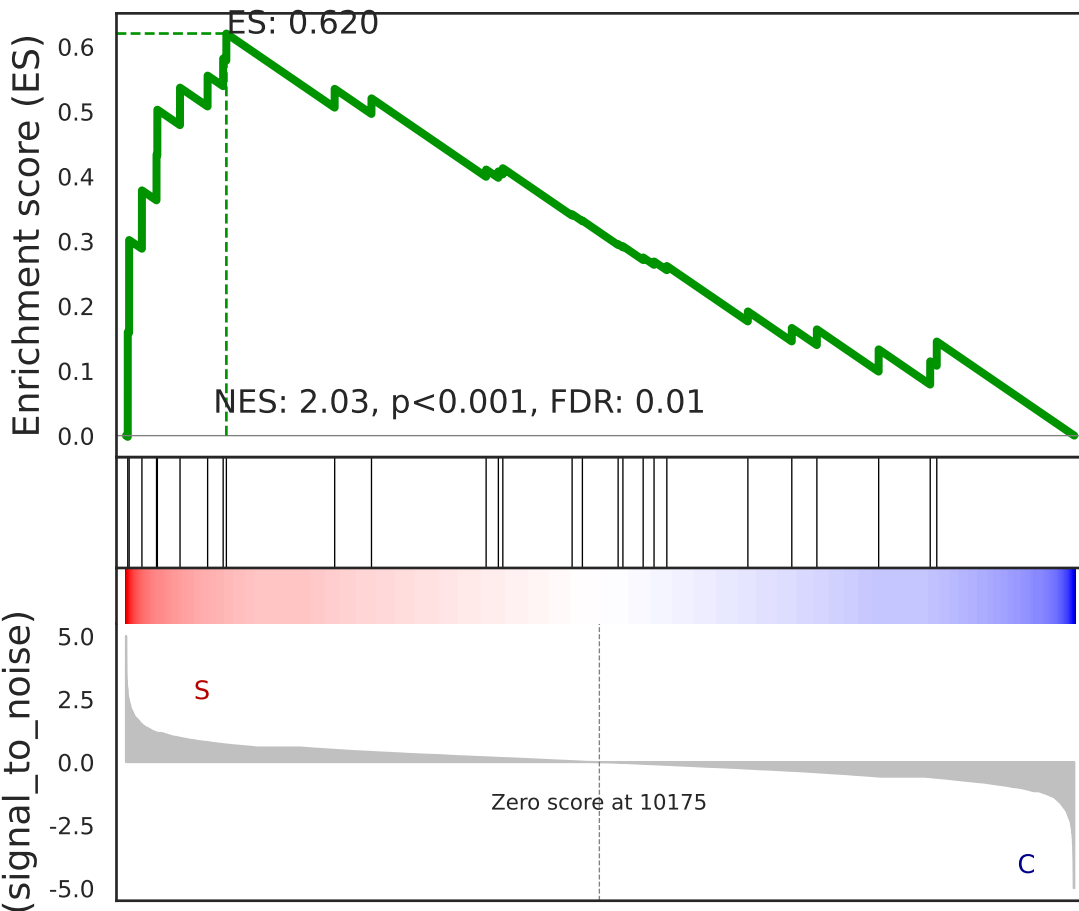

Supplement: Supplementary file 511 [file 5_One-carbon metabolism(WP241).gsea.pdf › Source data/1.RNA-Seq source data/2.HUVECs/result/1.6.GSEA/S-vs-C/wiki/5_One-carbon metabolism(WP241).gsea.pdf]

One-carbon metabolism(WP241)  
Heatmap of the Analyzed GeneSet

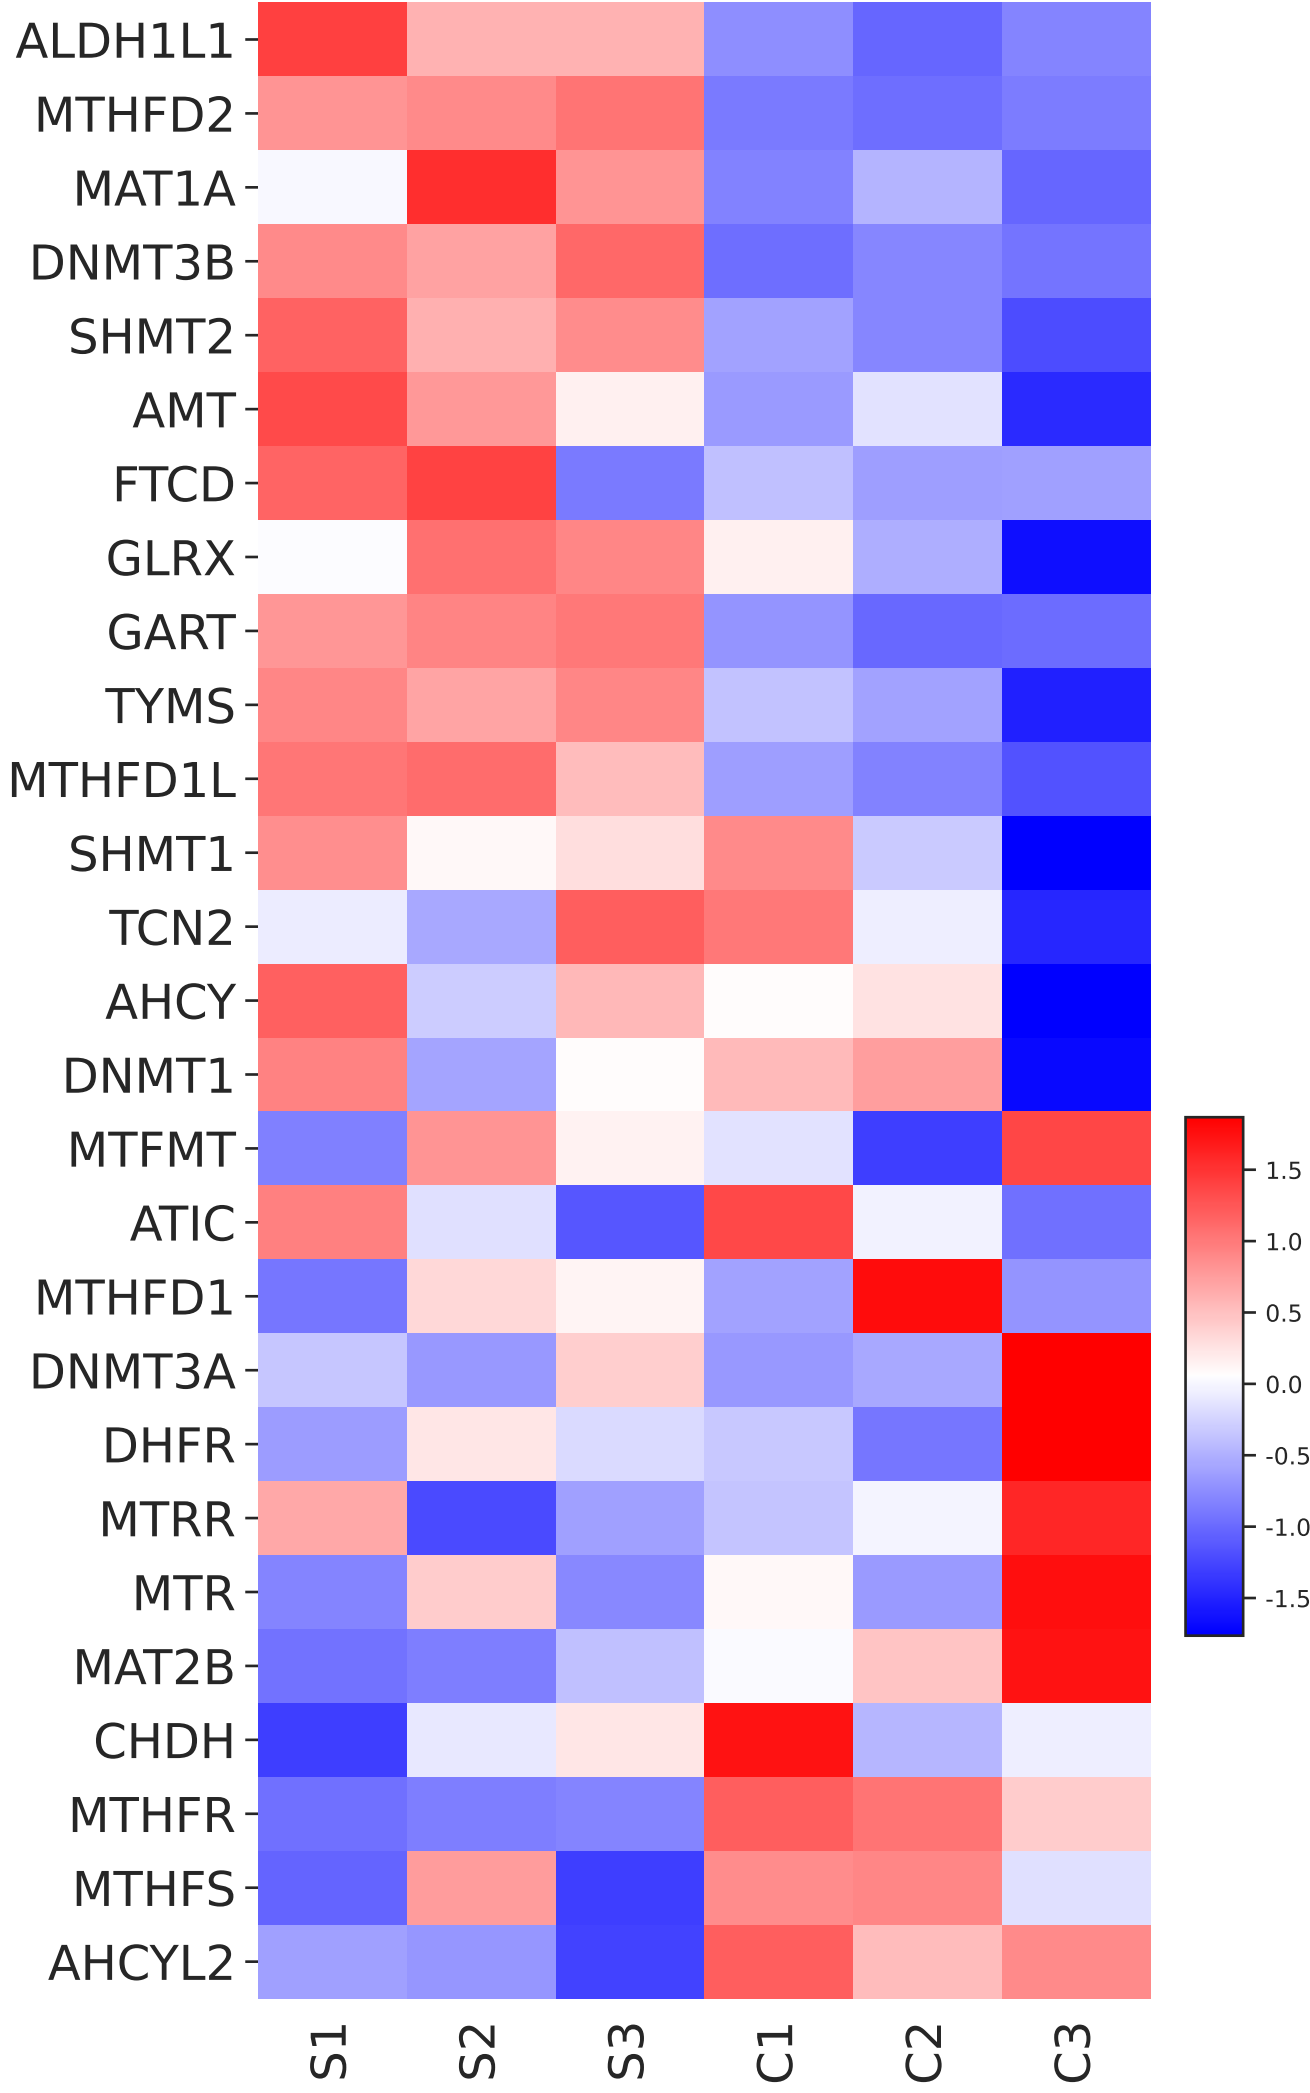

Supplement: Supplementary file 512 [file 5_One-carbon metabolism(WP241).heatmap.pdf › Source data/1.RNA-Seq source data/2.HUVECs/result/1.6.GSEA/S-vs-C/wiki/5_One-carbon metabolism(WP241).heatmap.pdf]

# DNA mismatch repair(WP531)

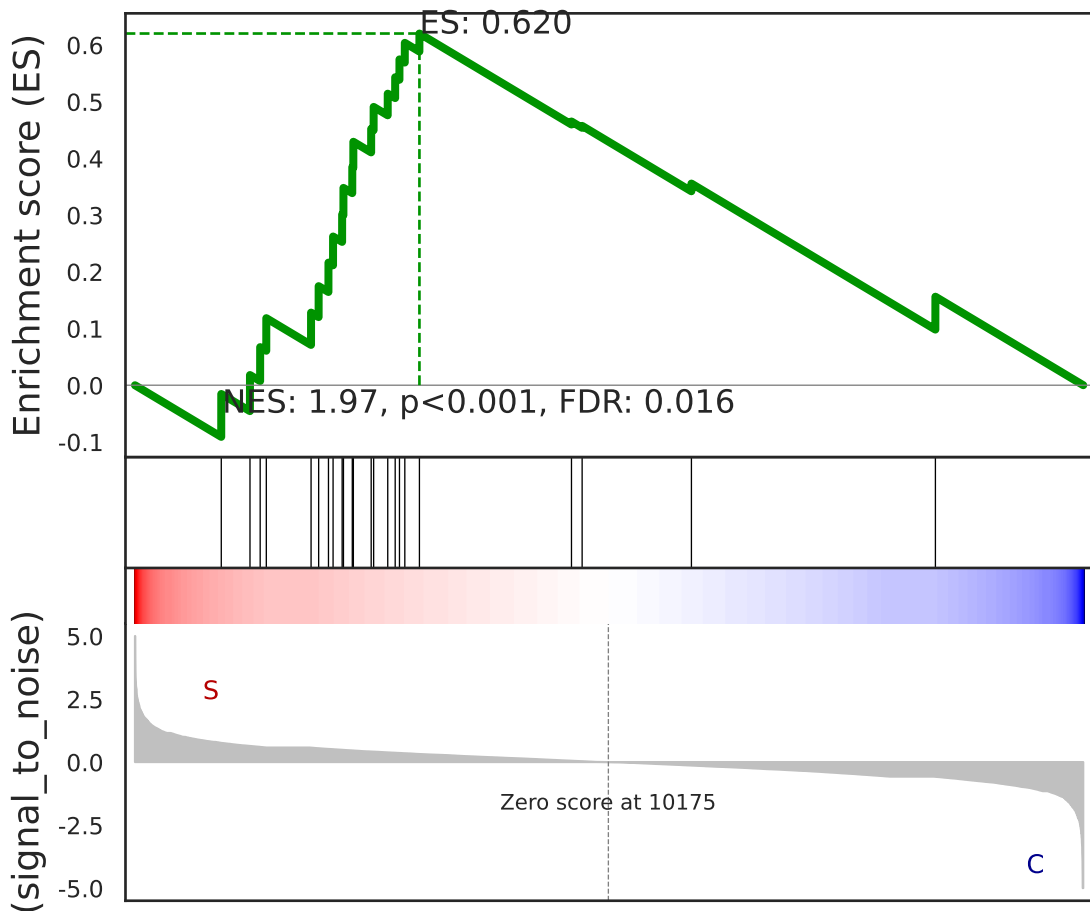

Supplement: Supplementary file 513 [file 6_DNA mismatch repair(WP531).gsea.pdf › Source data/1.RNA-Seq source data/2.HUVECs/result/1.6.GSEA/S-vs-C/wiki/6_DNA mismatch repair(WP531).gsea.pdf]

DNA mismatch repair(WP531)  
Heatmap of the Analyzed GeneSet

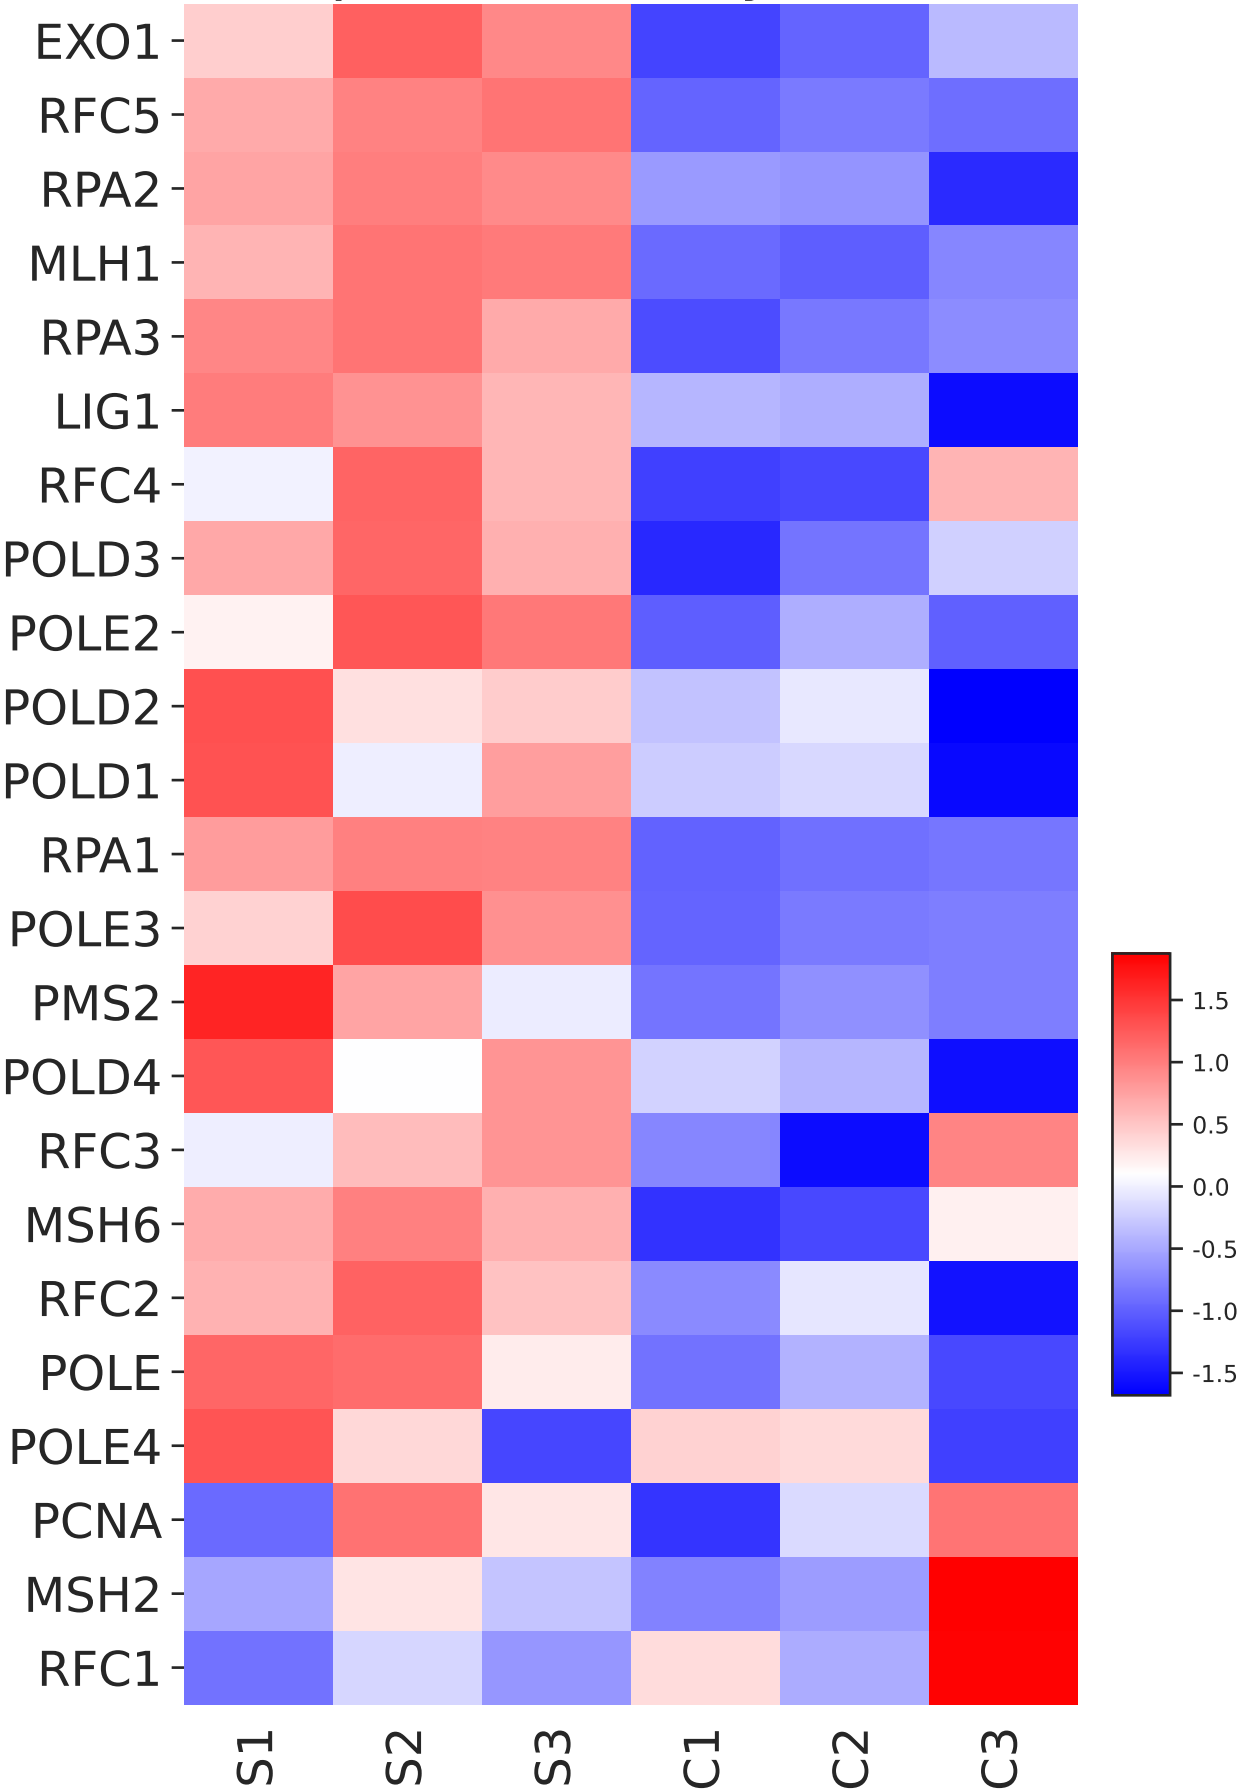

Supplement: Supplementary file 514 [file 6_DNA mismatch repair(WP531).heatmap.pdf › Source data/1.RNA-Seq source data/2.HUVECs/result/1.6.GSEA/S-vs-C/wiki/6_DNA mismatch repair(WP531).heatmap.pdf]

# Hypertrophy model(WP516)

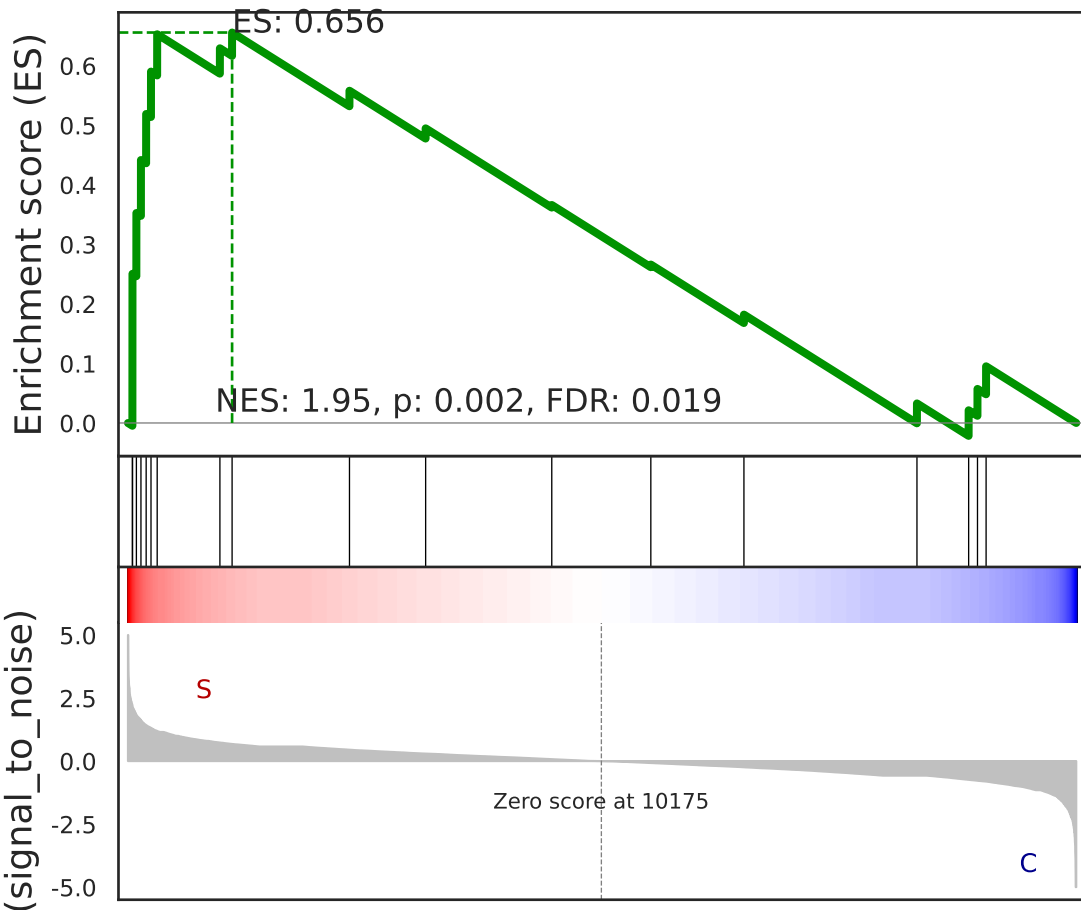

Supplement: Supplementary file 515 [file 7_Hypertrophy model(WP516).gsea.pdf › Source data/1.RNA-Seq source data/2.HUVECs/result/1.6.GSEA/S-vs-C/wiki/7_Hypertrophy model(WP516).gsea.pdf]

# Hypertrophy model(WP516)

## Heatmap of the Analyzed GeneSet

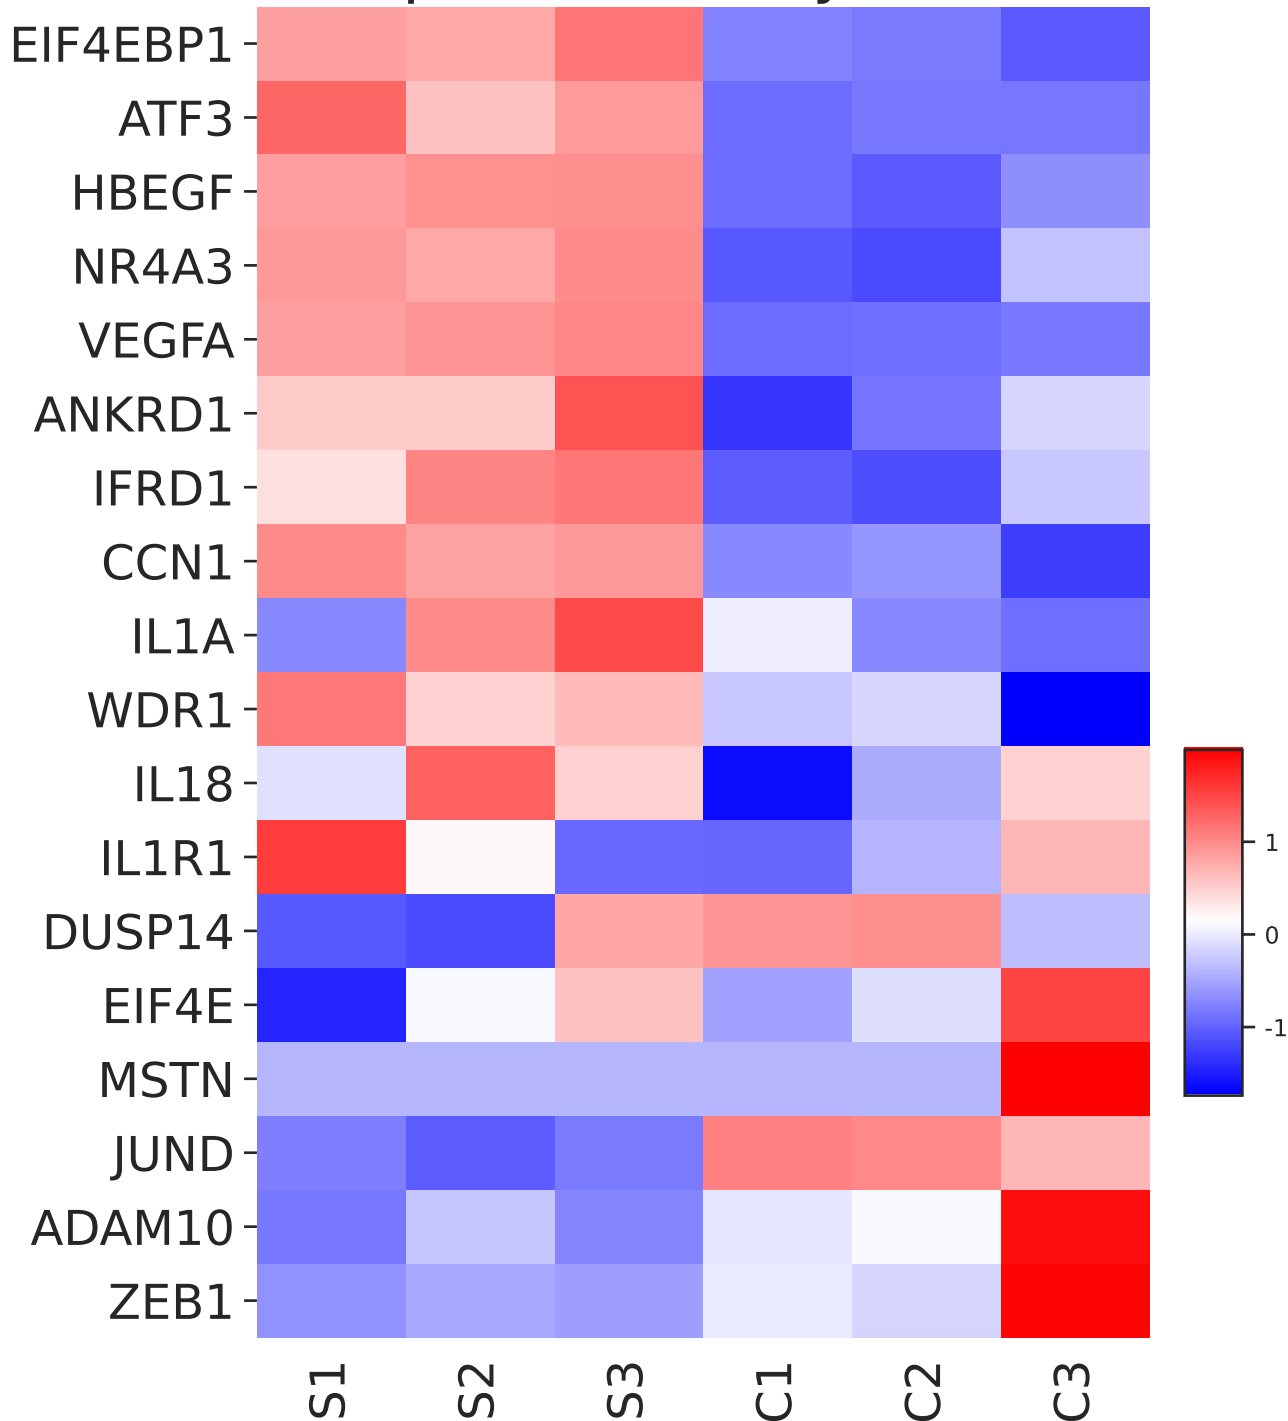

Supplement: Supplementary file 516 [file 7_Hypertrophy model(WP516).heatmap.pdf › Source data/1.RNA-Seq source data/2.HUVECs/result/1.6.GSEA/S-vs-C/wiki/7_Hypertrophy model(WP516).heatmap.pdf]

# Urea cycle and associated pathways(WP4595)

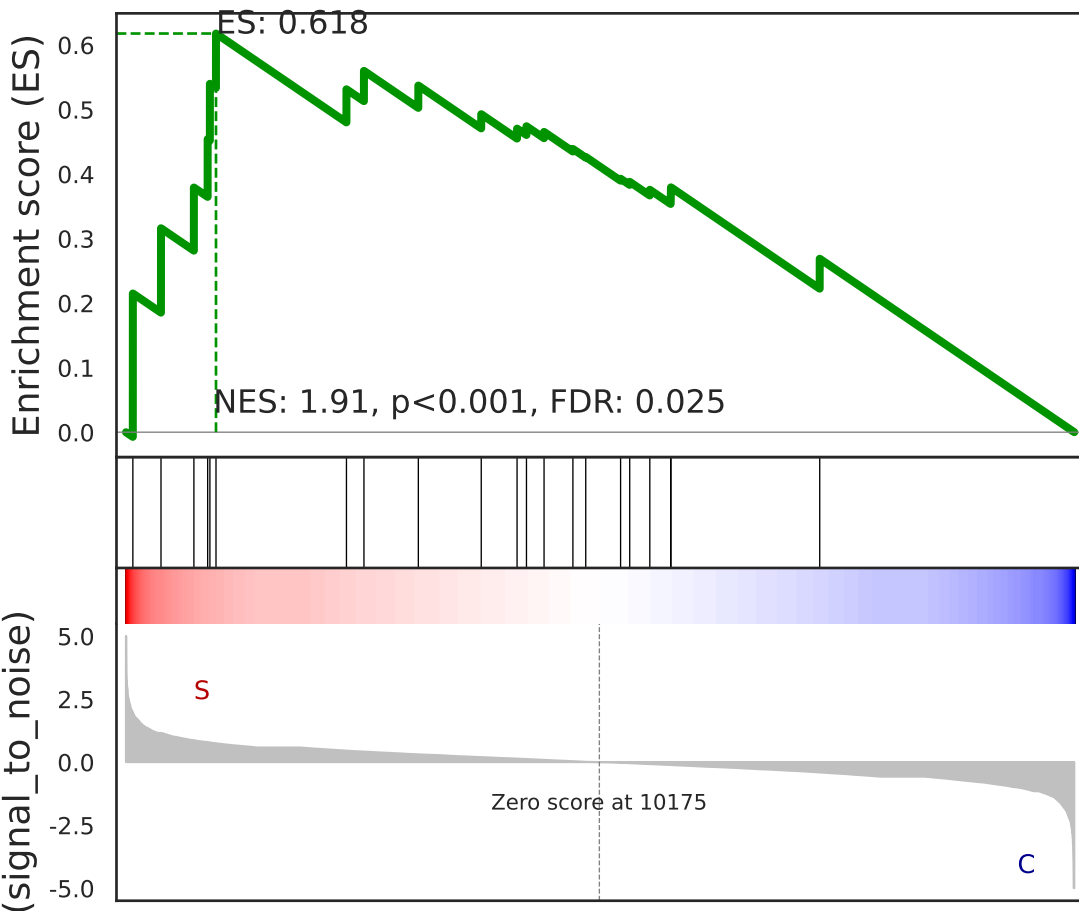

Supplement: Supplementary file 517 [file 8_Urea cycle and associated pathways(WP4595).gsea.pdf › Source data/1.RNA-Seq source data/2.HUVECs/result/1.6.GSEA/S-vs-C/wiki/8_Urea cycle and associated pathways(WP4595).gsea.pdf]

# Urea cycle and associated pathways(WP4595)

## Heatmap of the Analyzed GeneSet

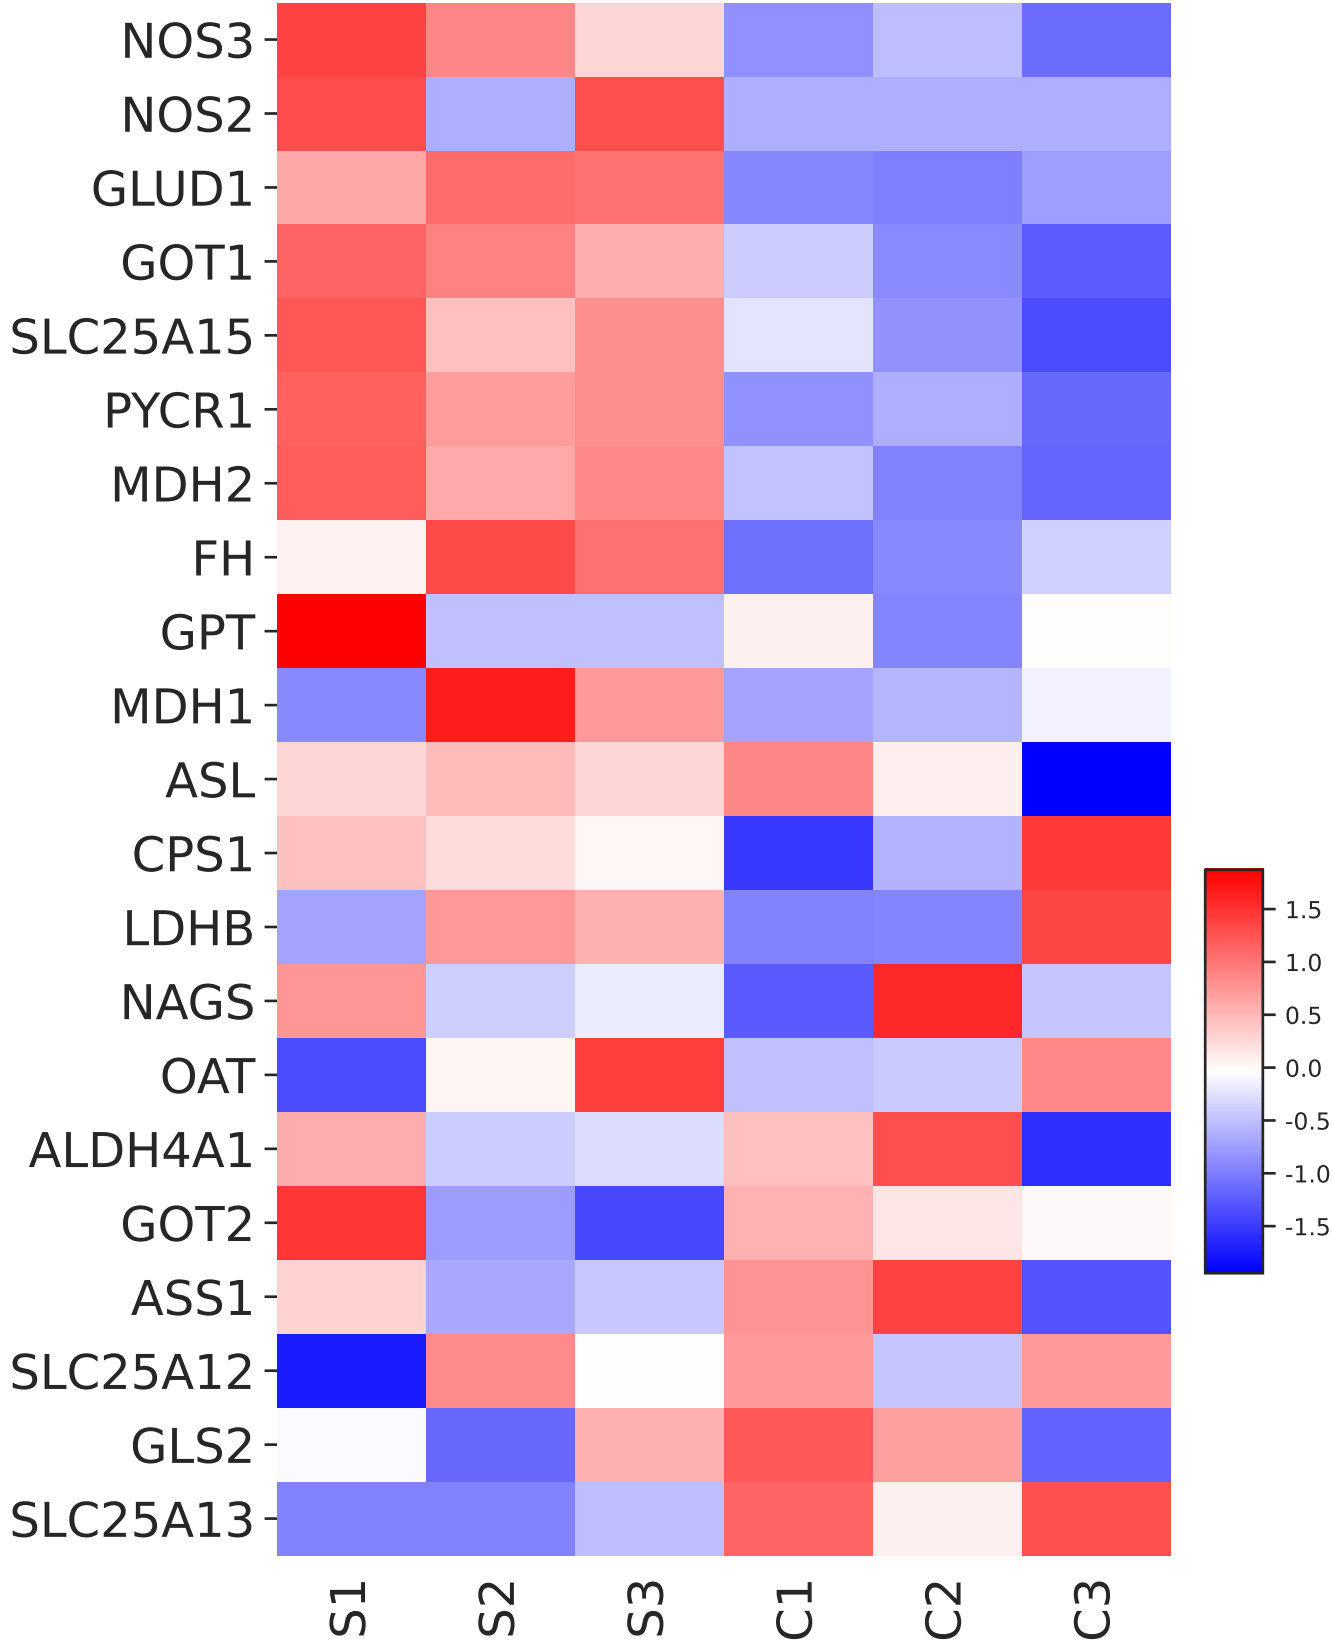

Supplement: Supplementary file 518 [file 8_Urea cycle and associated pathways(WP4595).heatmap.pdf › Source data/1.RNA-Seq source data/2.HUVECs/result/1.6.GSEA/S-vs-C/wiki/8_Urea cycle and associated pathways(WP4595).heatmap.pdf]

# Imatinib and chronic myeloid leukemia(WP3640)

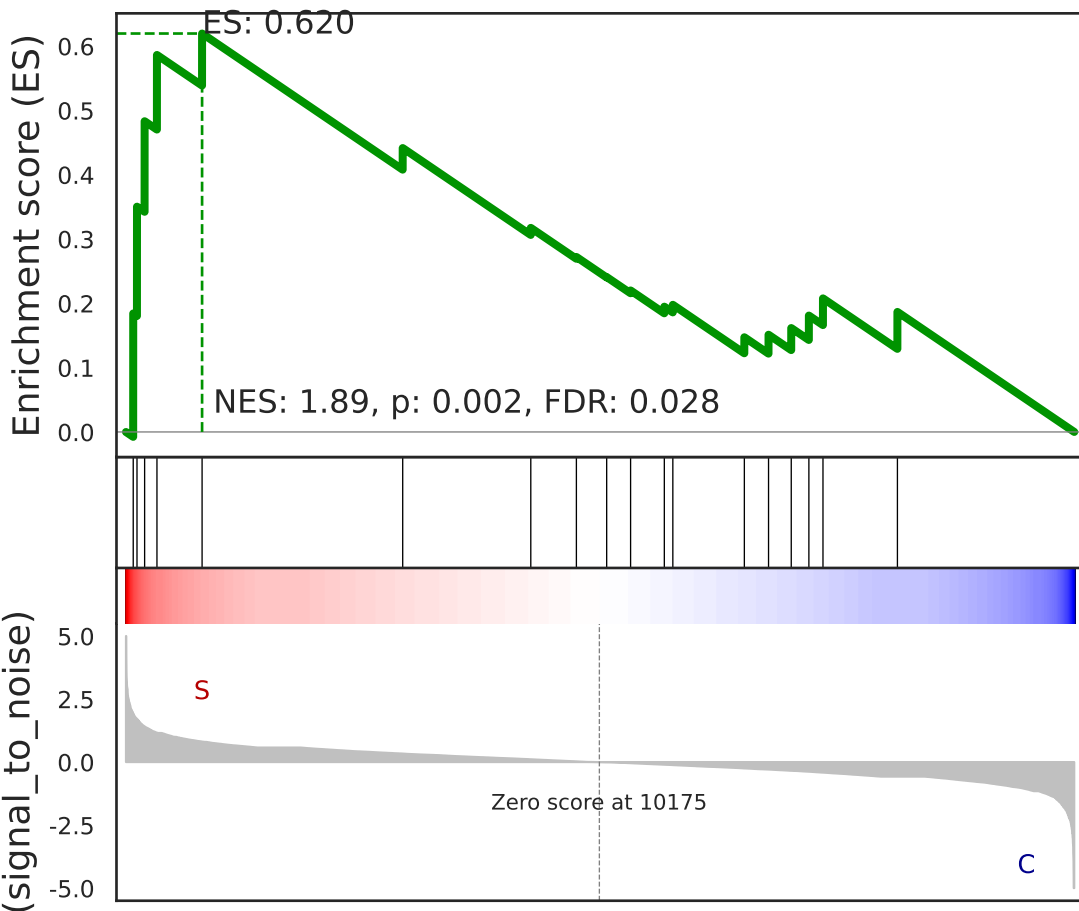

Supplement: Supplementary file 519 [file 9_Imatinib and chronic myeloid leukemia(WP3640).gsea.pdf › Source data/1.RNA-Seq source data/2.HUVECs/result/1.6.GSEA/S-vs-C/wiki/9_Imatinib and chronic myeloid leukemia(WP3640).gsea.pdf]

# Imatinib and chronic myeloid leukemia(WP3640)

## Heatmap of the Analyzed GeneSet

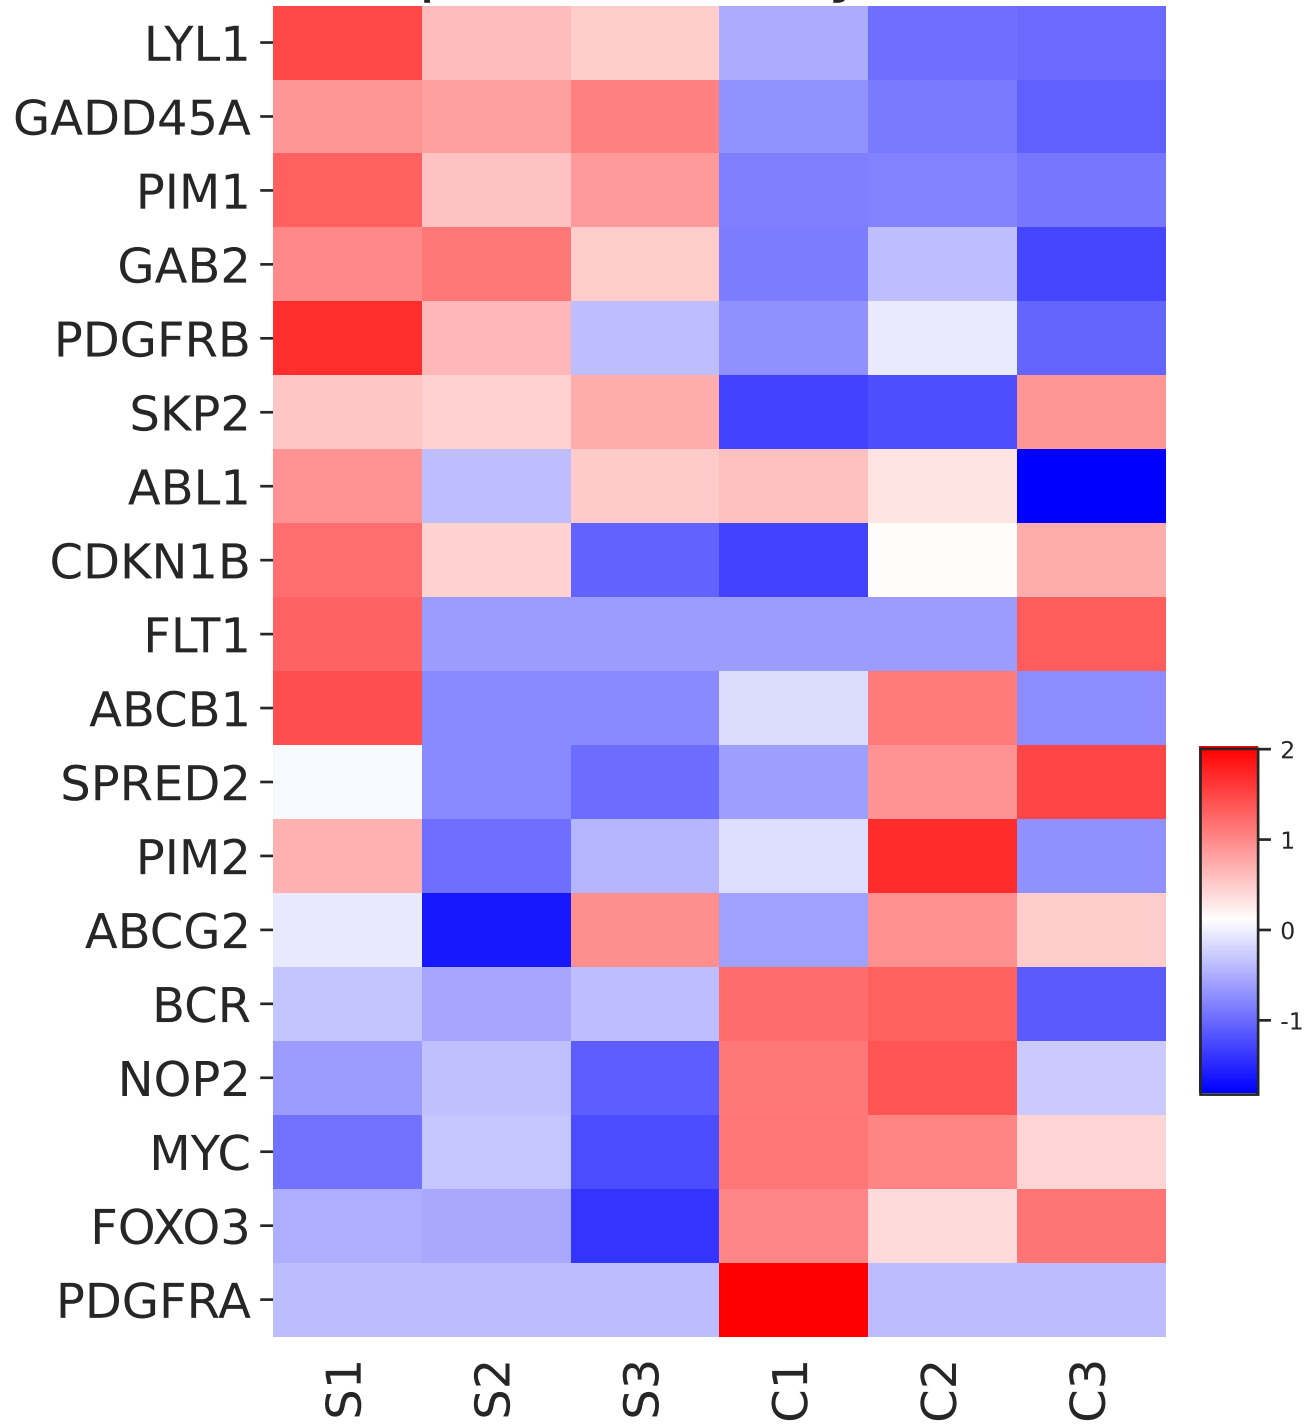

Supplement: Supplementary file 520 [file 9_Imatinib and chronic myeloid leukemia(WP3640).heatmap.pdf › Source data/1.RNA-Seq source data/2.HUVECs/result/1.6.GSEA/S-vs-C/wiki/9_Imatinib and chronic myeloid leukemia(WP3640).heatmap.pdf]

TFs Family Distribution(S-vs-C)

Unigene numbers

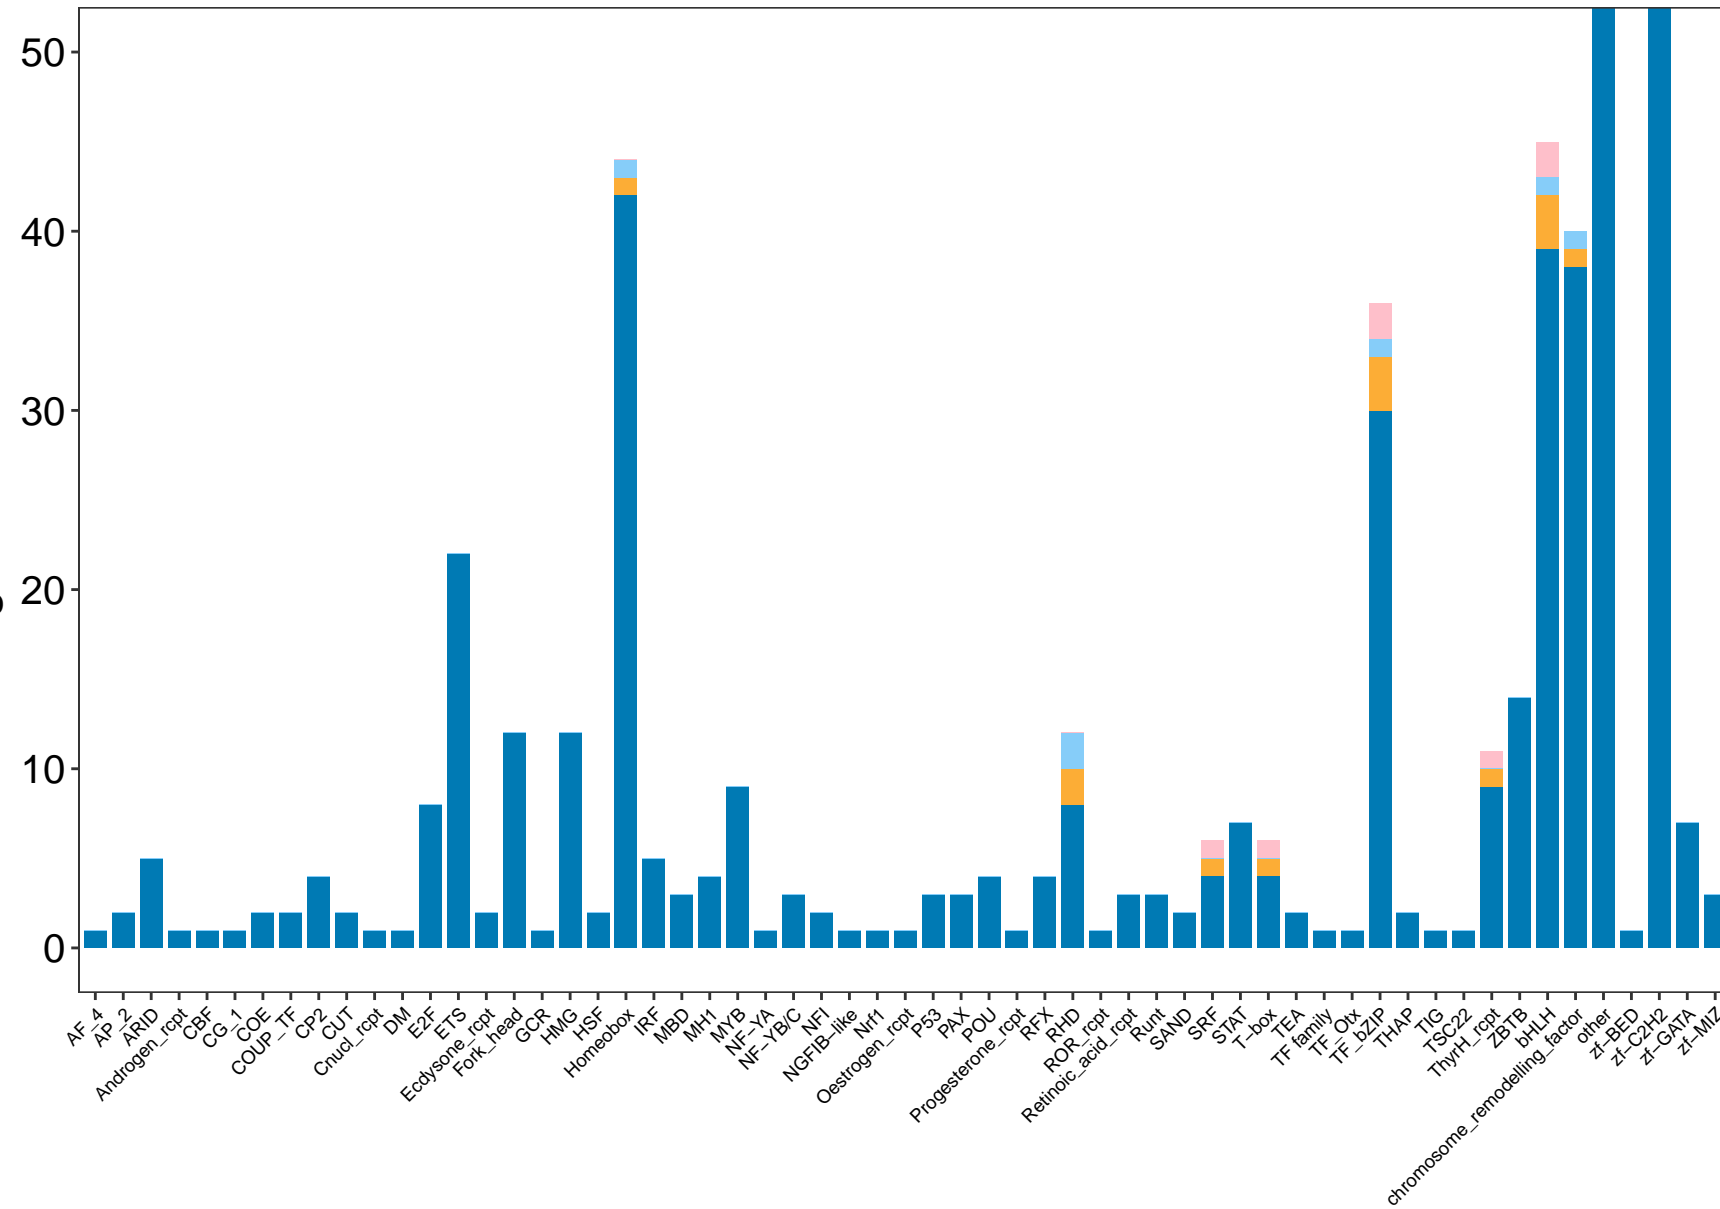

TFs family

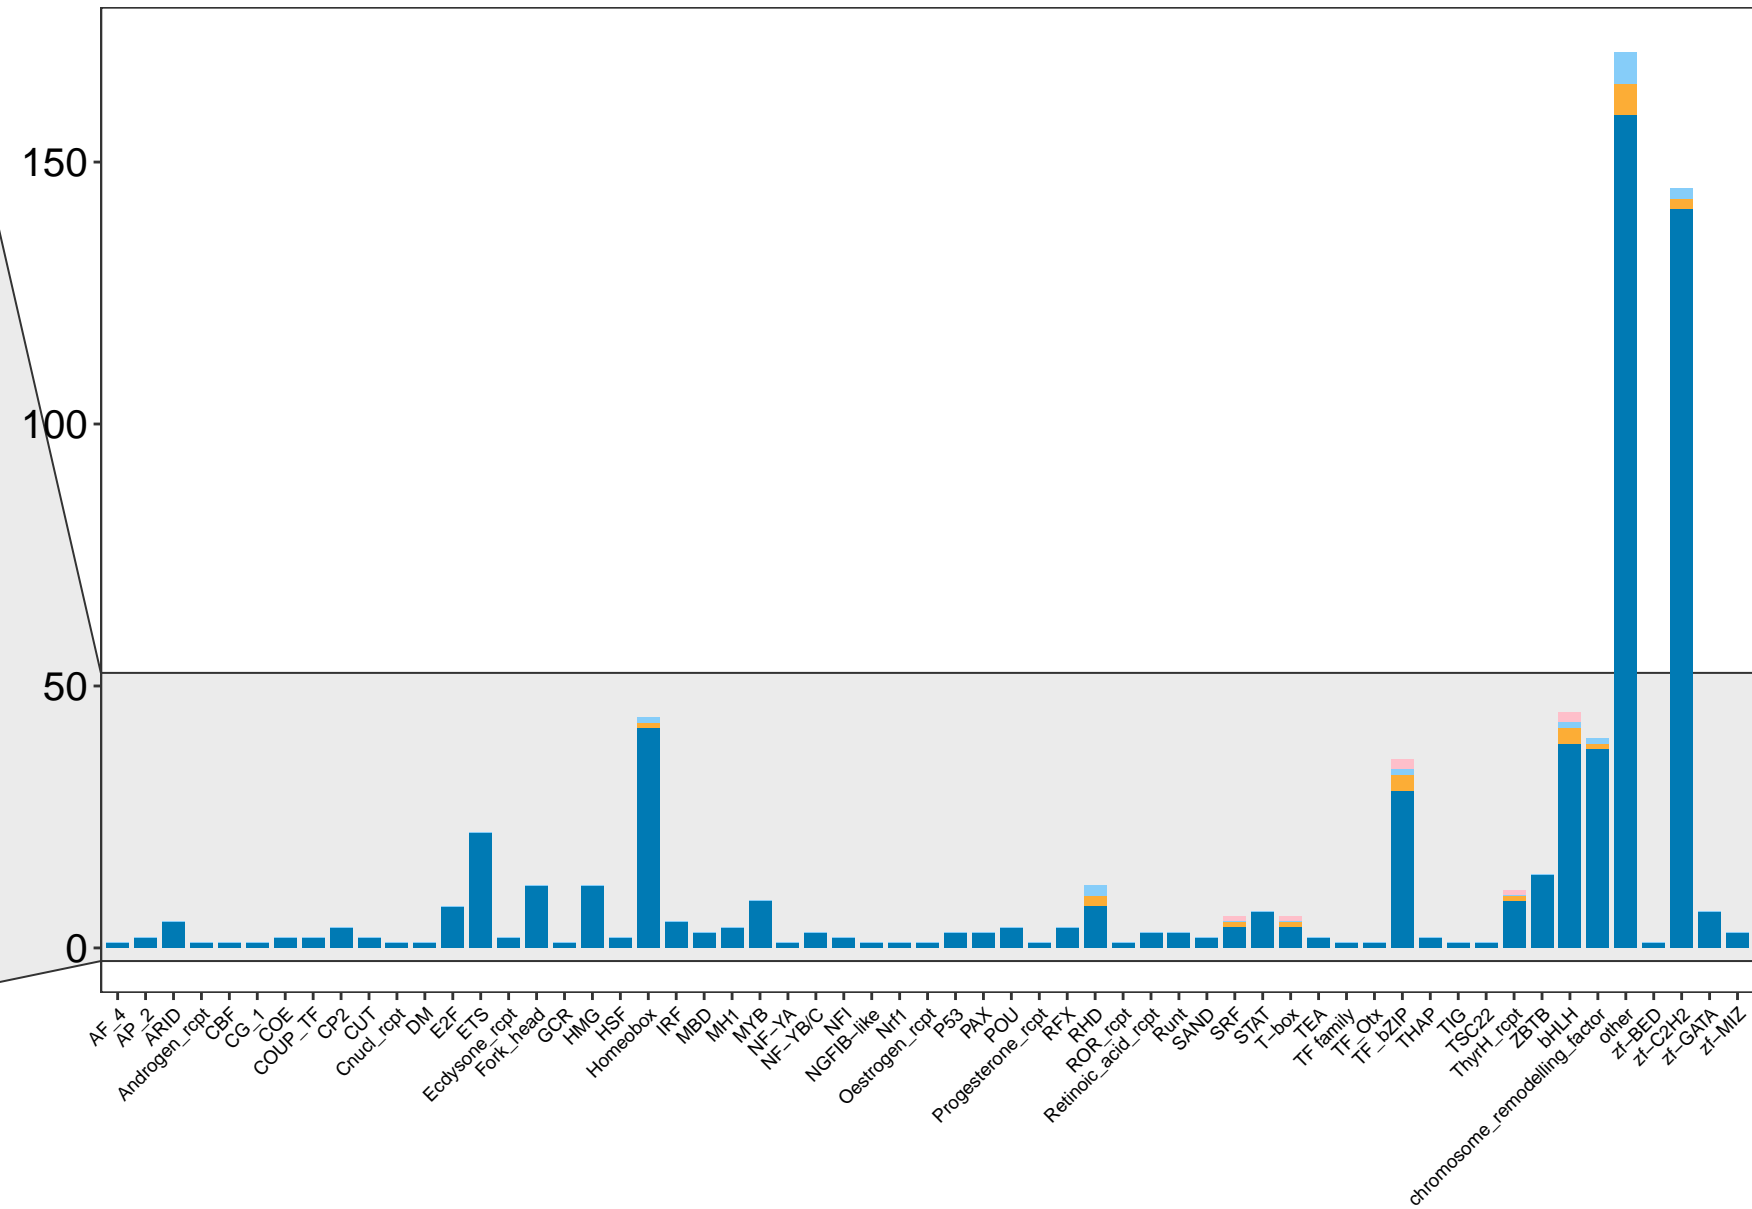

Group

Up  
Down  
DEG  
ALL

Supplement: Supplementary file 521 [file TFs_S-vs-C.pdf › Source data/1.RNA-Seq source data/2.HUVECs/result/1.7.TFs_targets_gene/S-vs-C/TFs_S-vs-C.pdf]

Targets statistics of (diff-S-vs-C\_TF\_regulation)

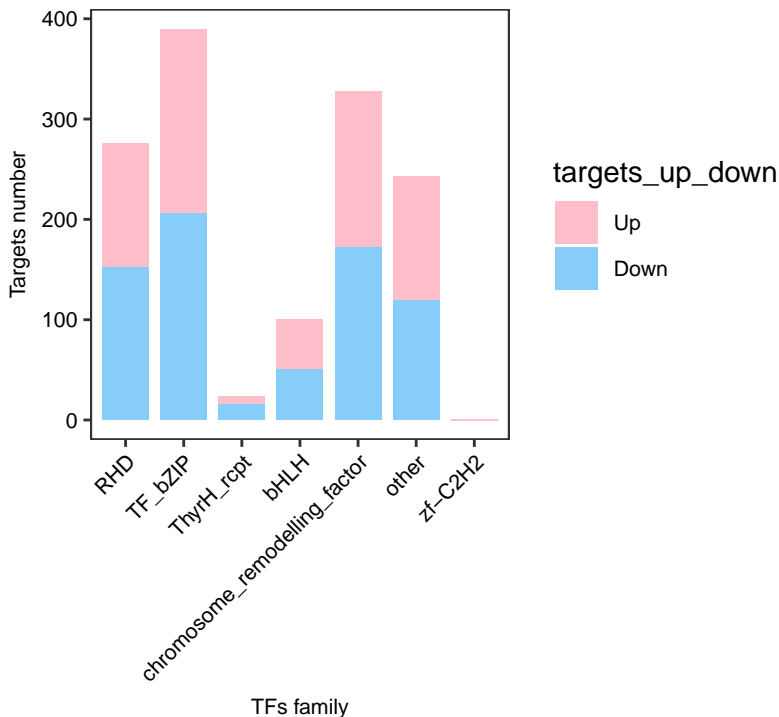

Supplement: Supplementary file 522 [file Target_Statistics_diff-S-vs-C_TF_regulation.pdf › Source data/1.RNA-Seq source data/2.HUVECs/result/1.7.TFs_targets_gene/S-vs-C/Target_Statistics_diff-S-vs-C_TF_regulation.pdf]

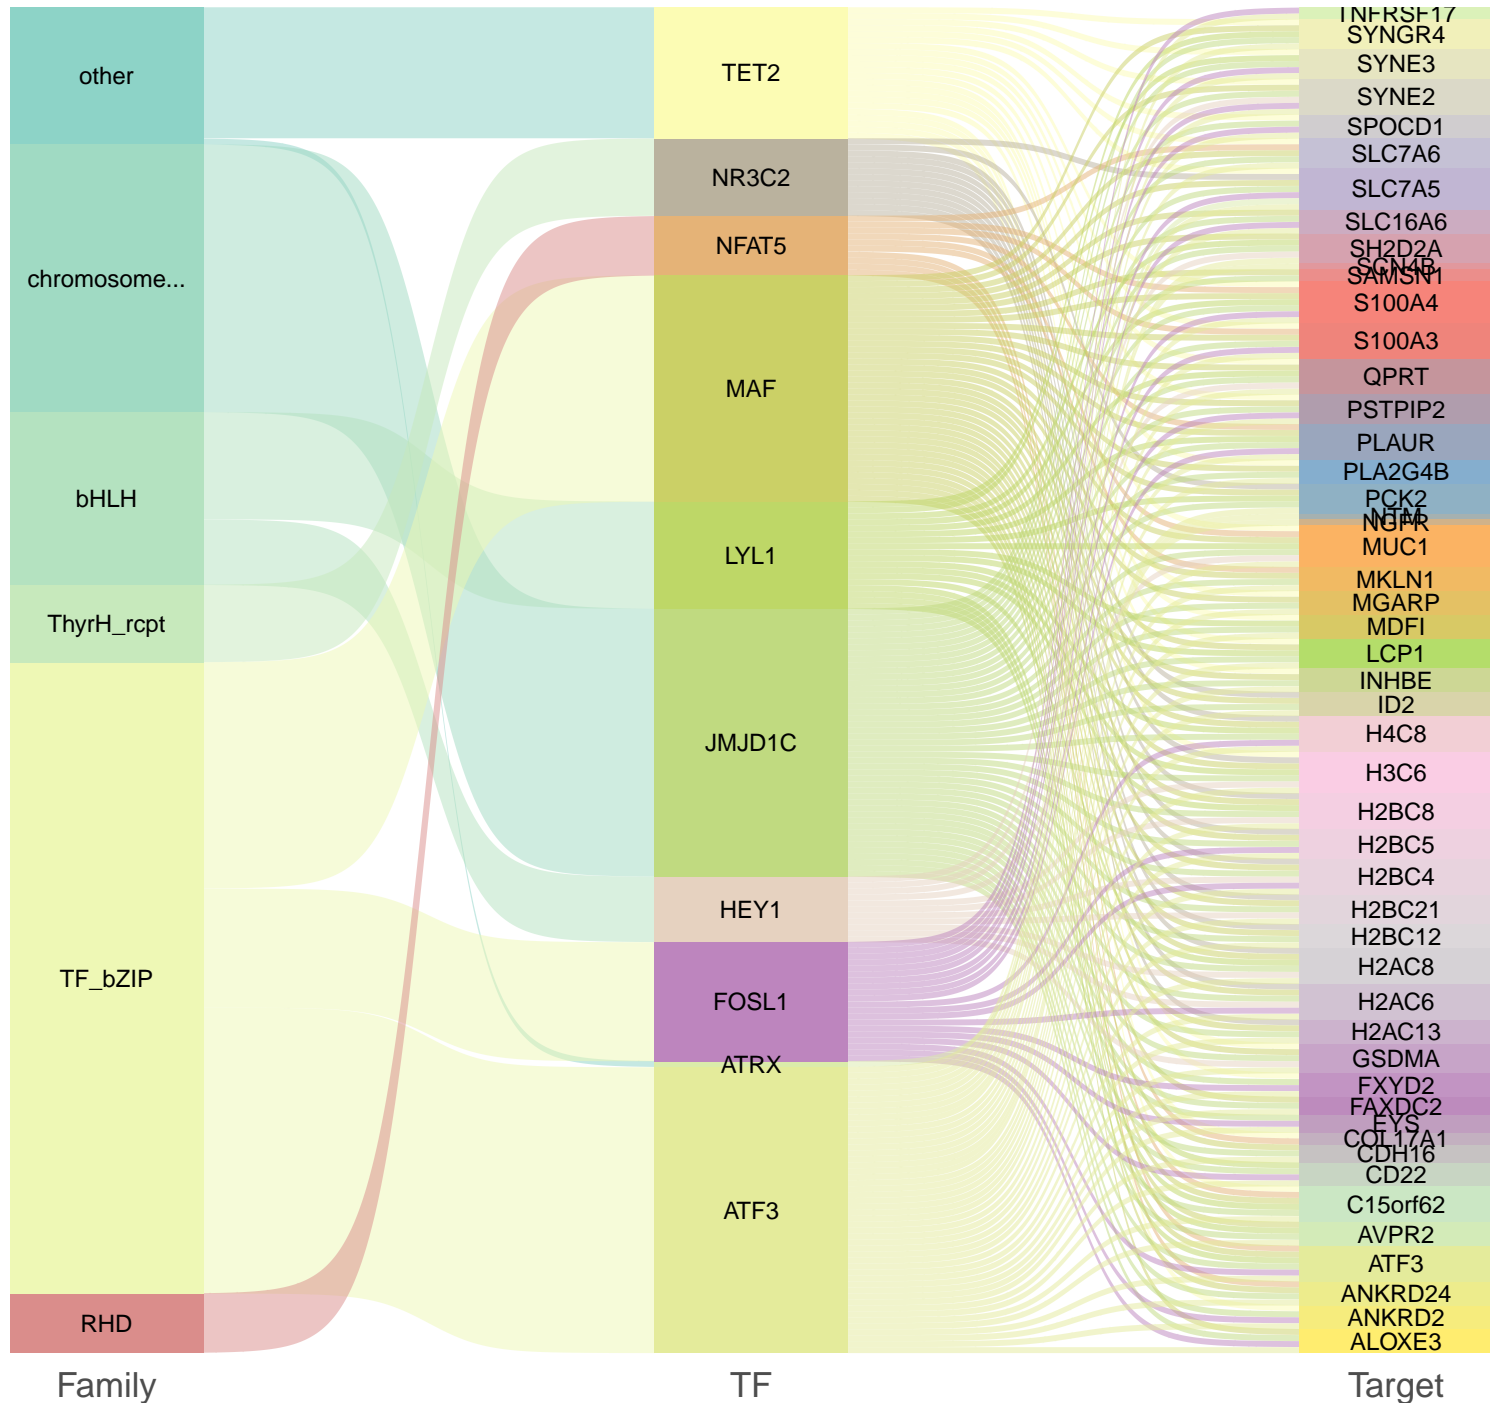

Supplement: Supplementary file 523 [file diff-S-vs-C_TF_regulation.sankey.pdf › Source data/1.RNA-Seq source data/2.HUVECs/result/1.7.TFs_targets_gene/S-vs-C/diff-S-vs-C_TF_regulation.sankey.pdf]

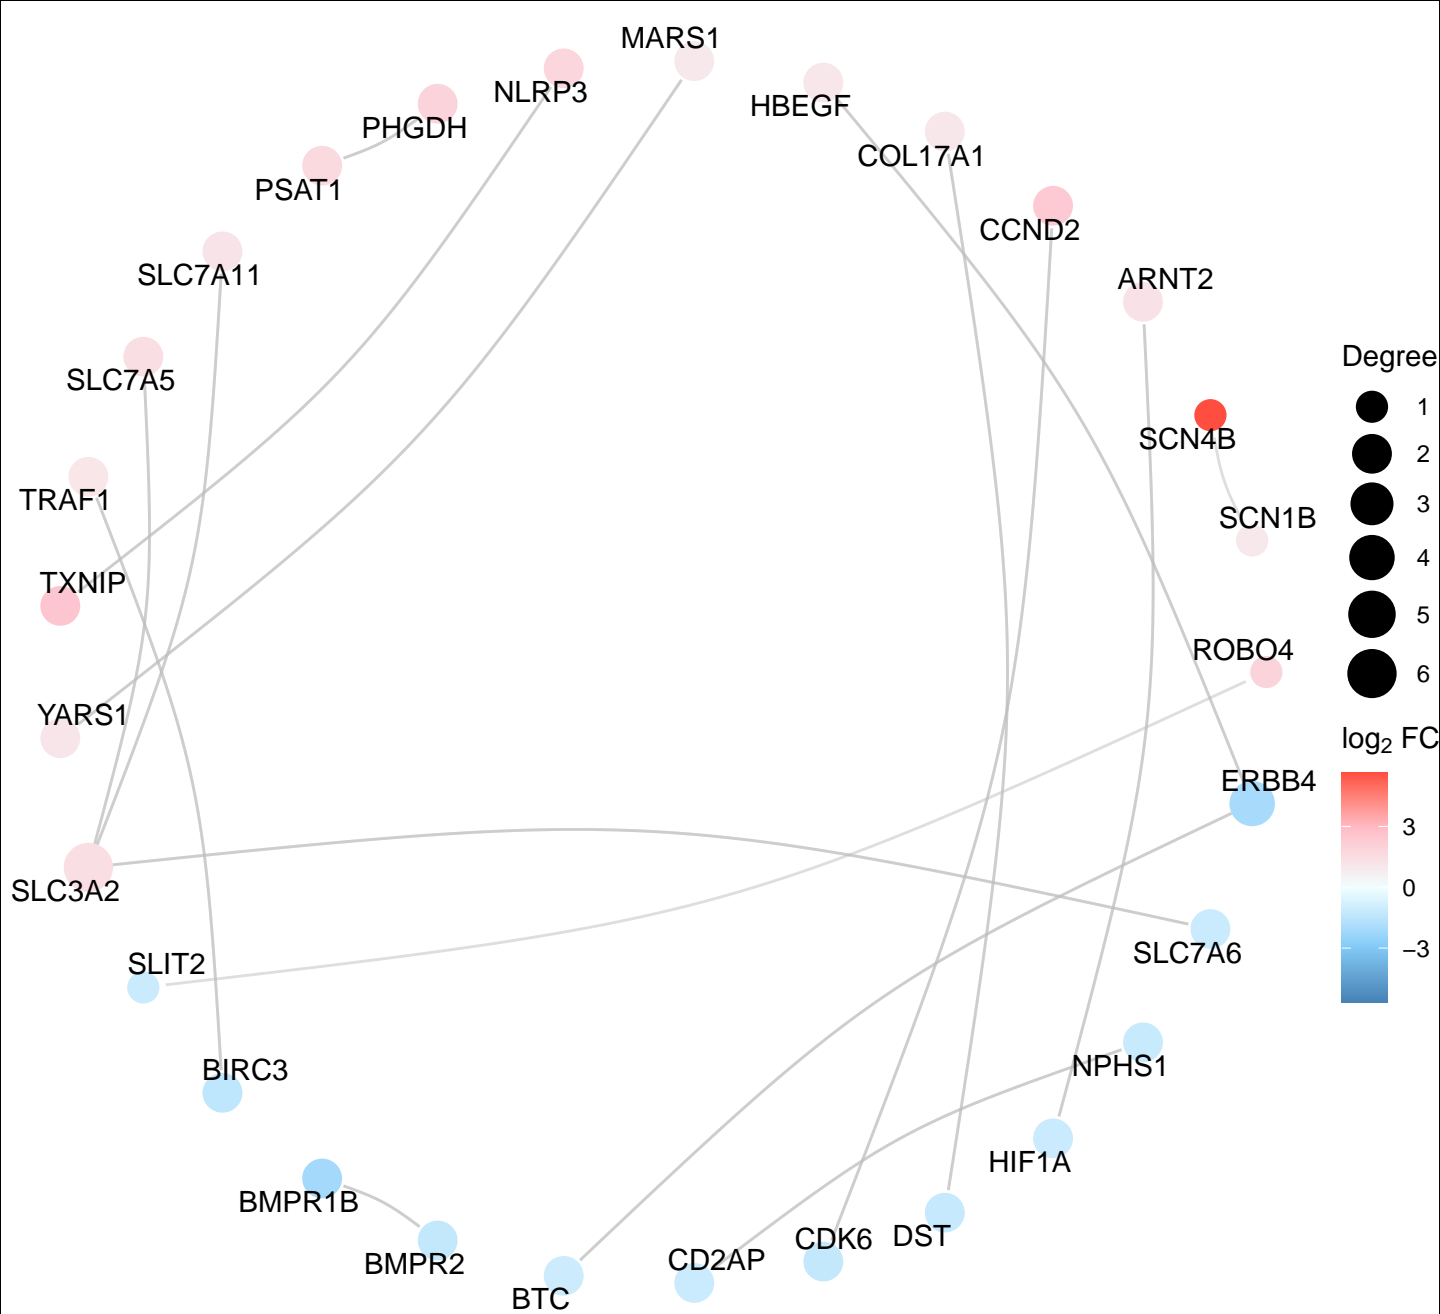

Supplement: Supplementary file 524 [file top_30_diff-S-vs-C_network.pdf › Source data/1.RNA-Seq source data/2.HUVECs/result/1.8.PPI/S-vs-C/top_30_diff-S-vs-C_network.pdf]

# Base distribution of C1

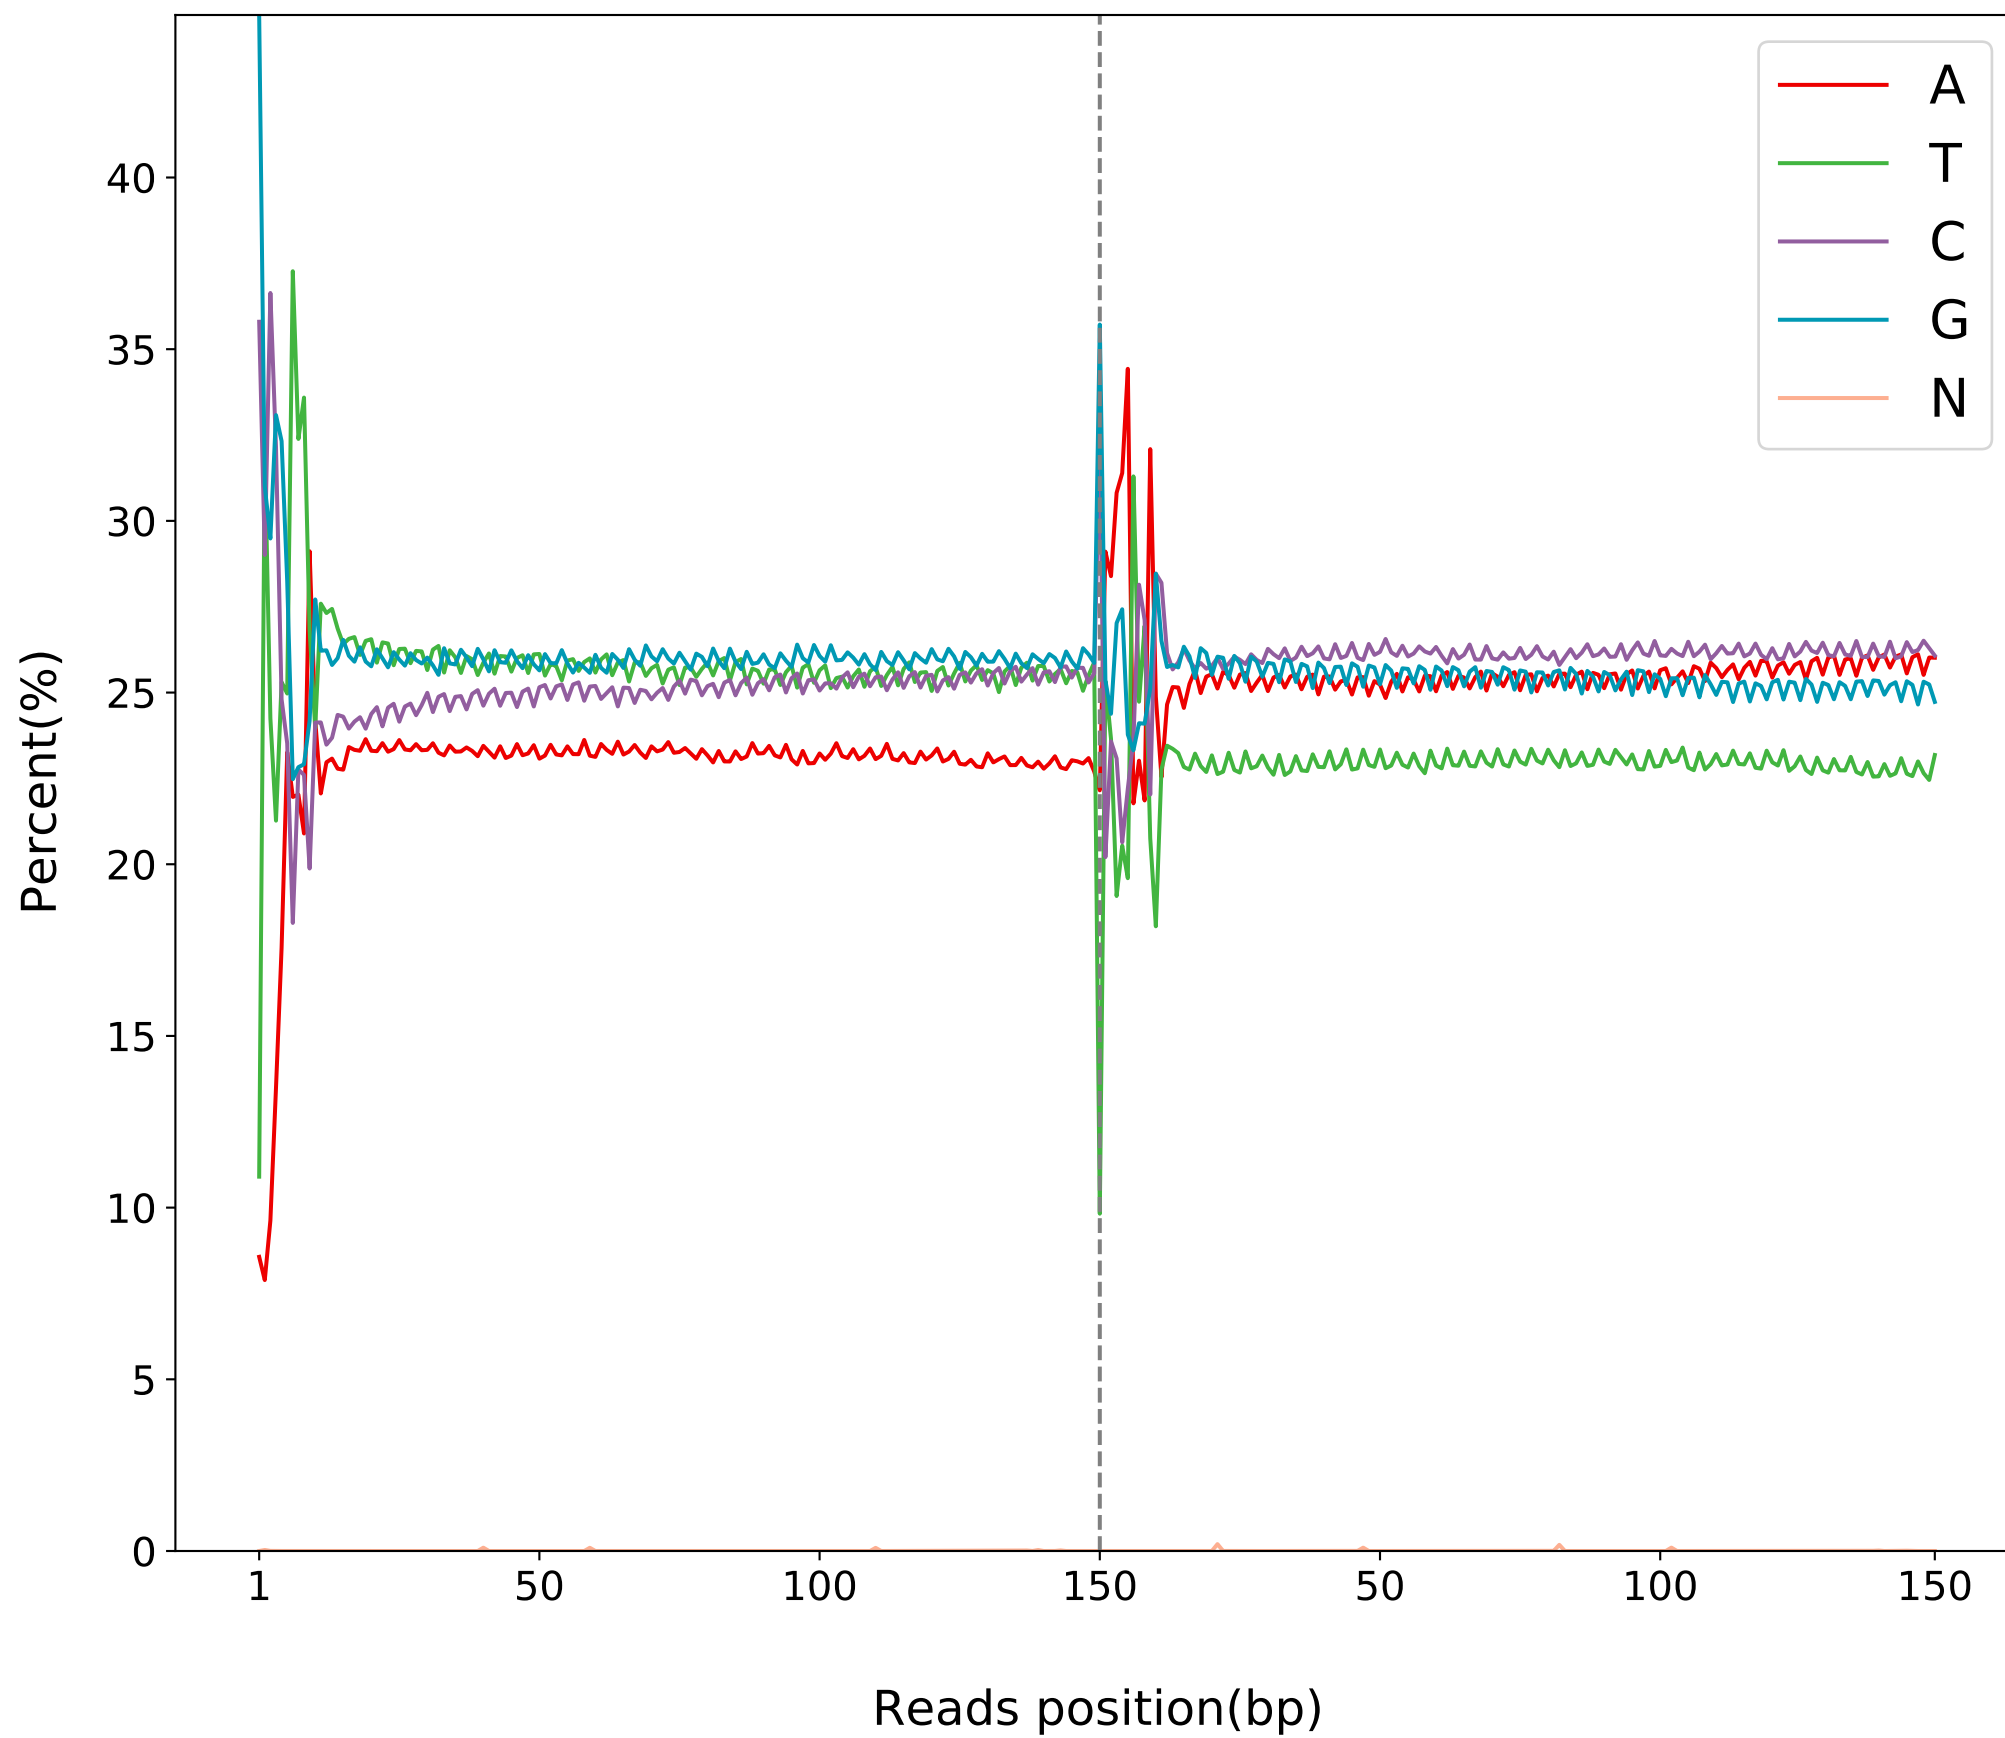

Supplement: Supplementary file 525 [file C1.cleandata.base.pdf › Source data/1.RNA-Seq source data/2.HUVECs/result/2.quality_control/2.1.fastqc/C1.cleandata.base.pdf]

# Quality distribution of C1

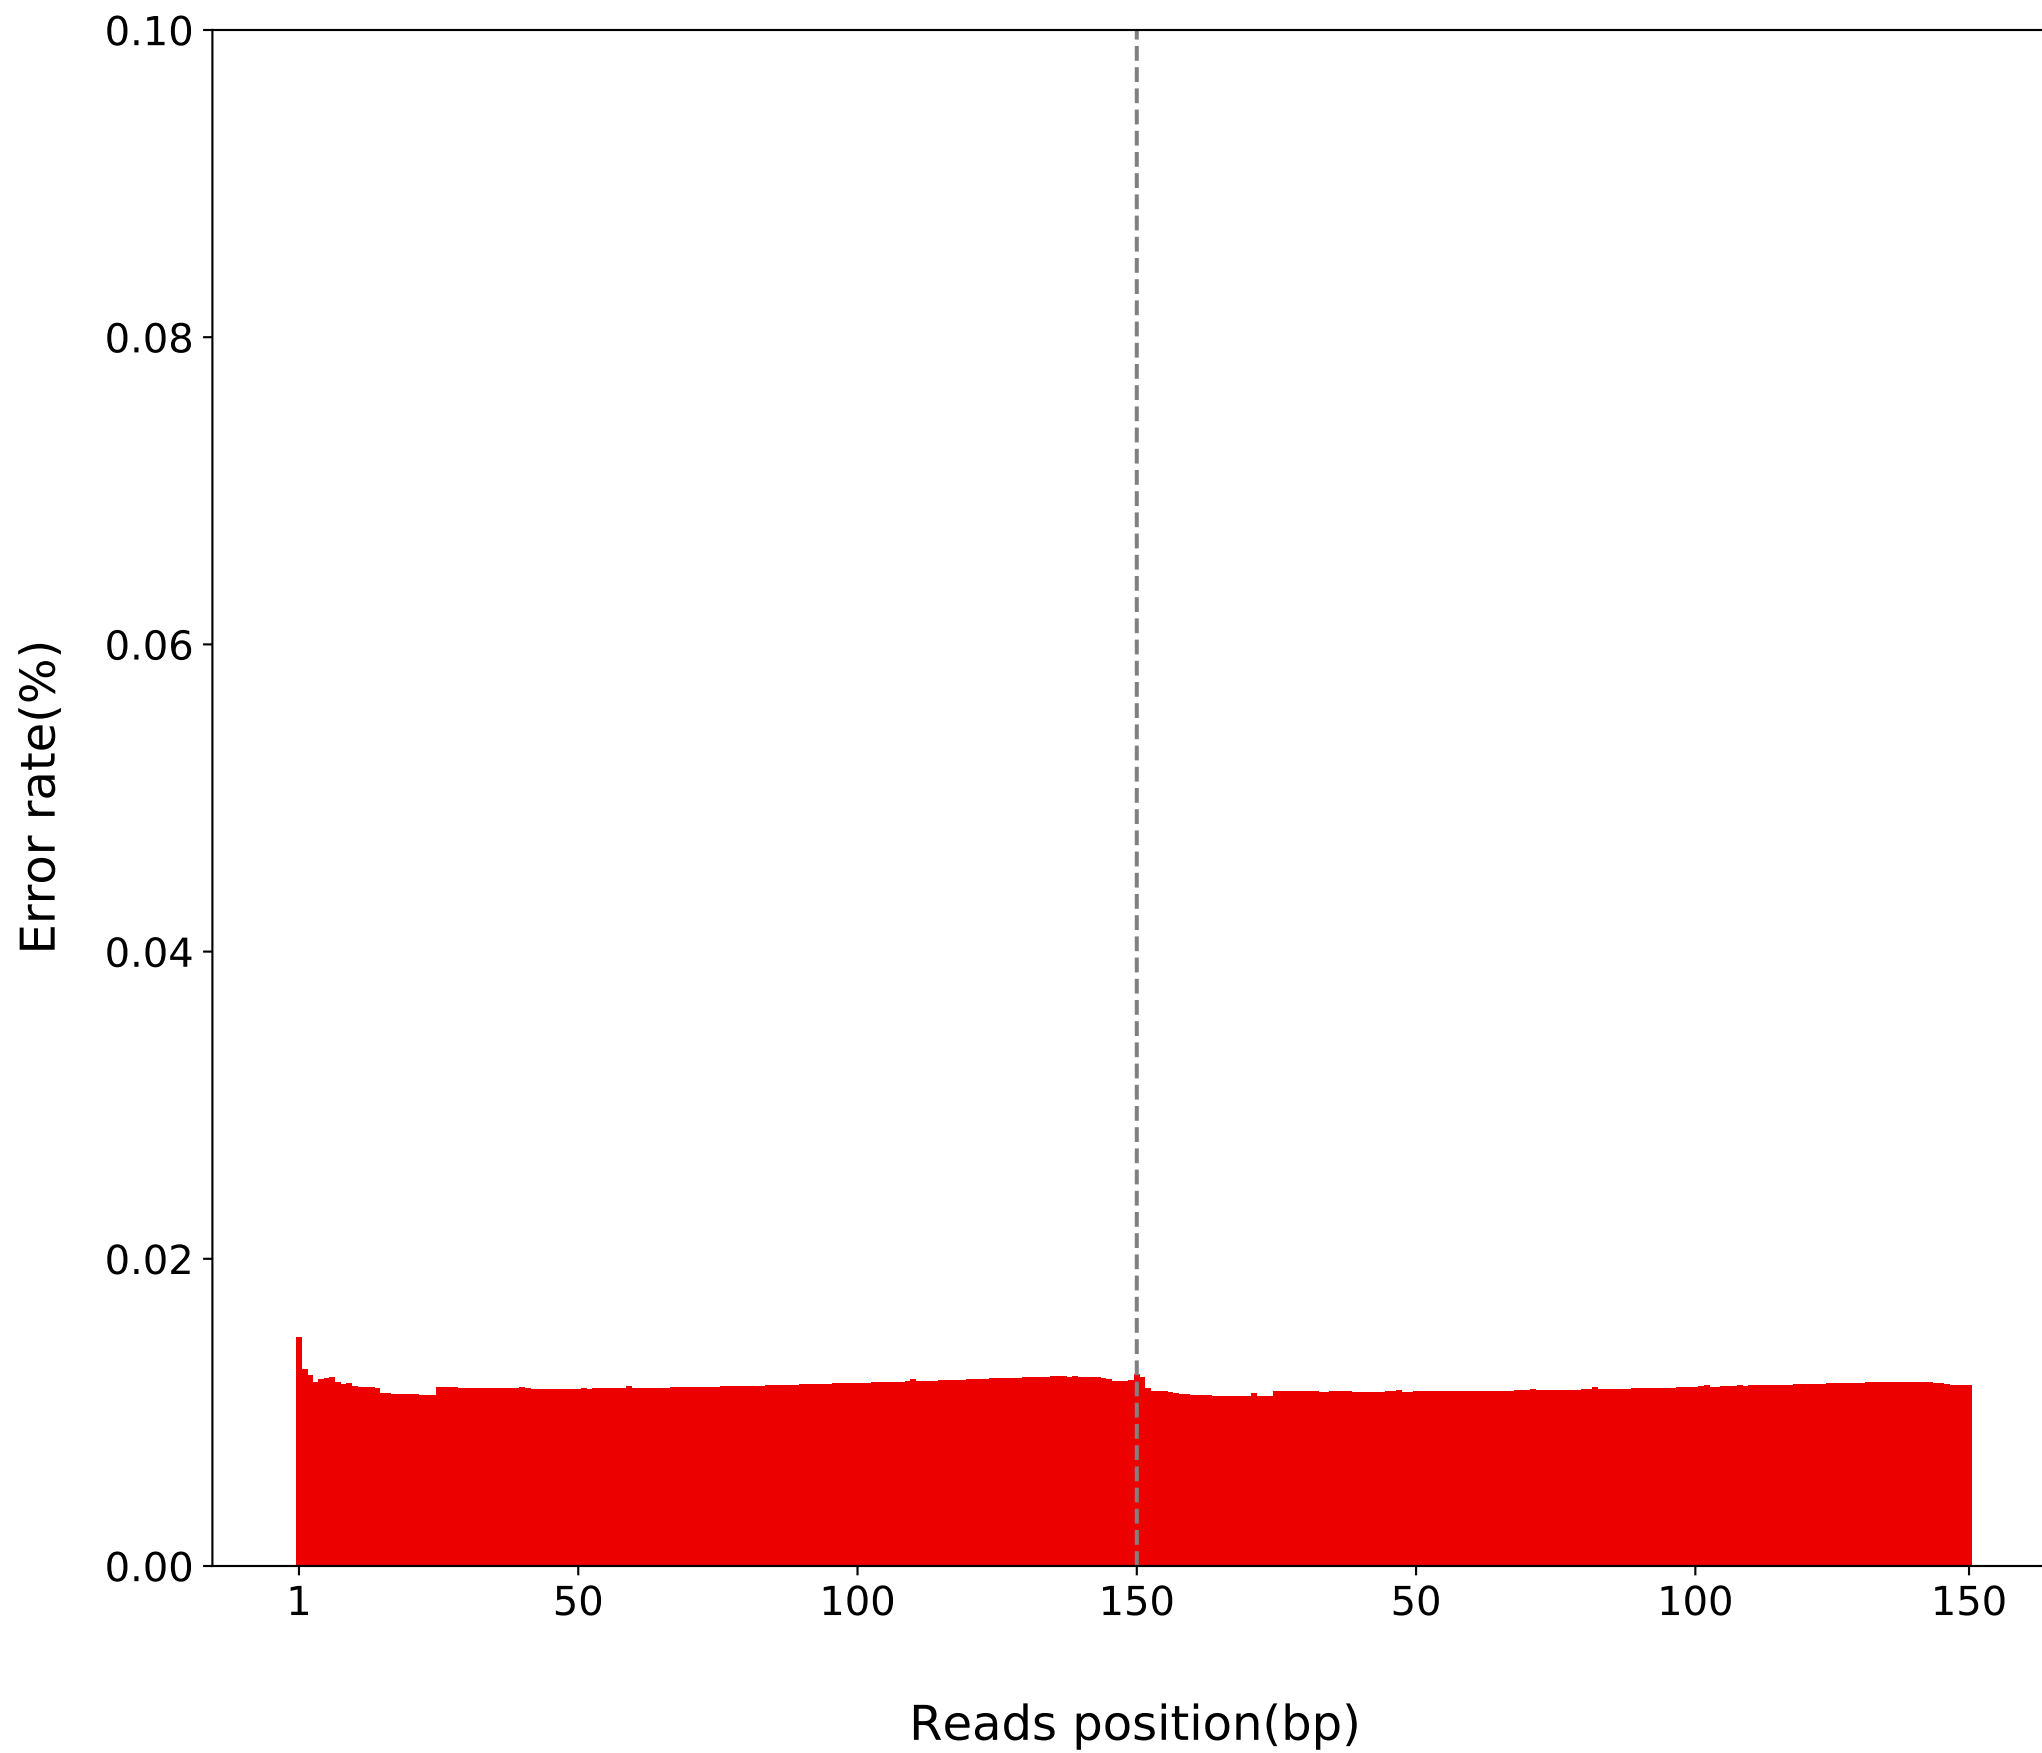

Supplement: Supplementary file 526 [file C1.cleandata.qual.pdf › Source data/1.RNA-Seq source data/2.HUVECs/result/2.quality_control/2.1.fastqc/C1.cleandata.qual.pdf]

# Base distribution of C2

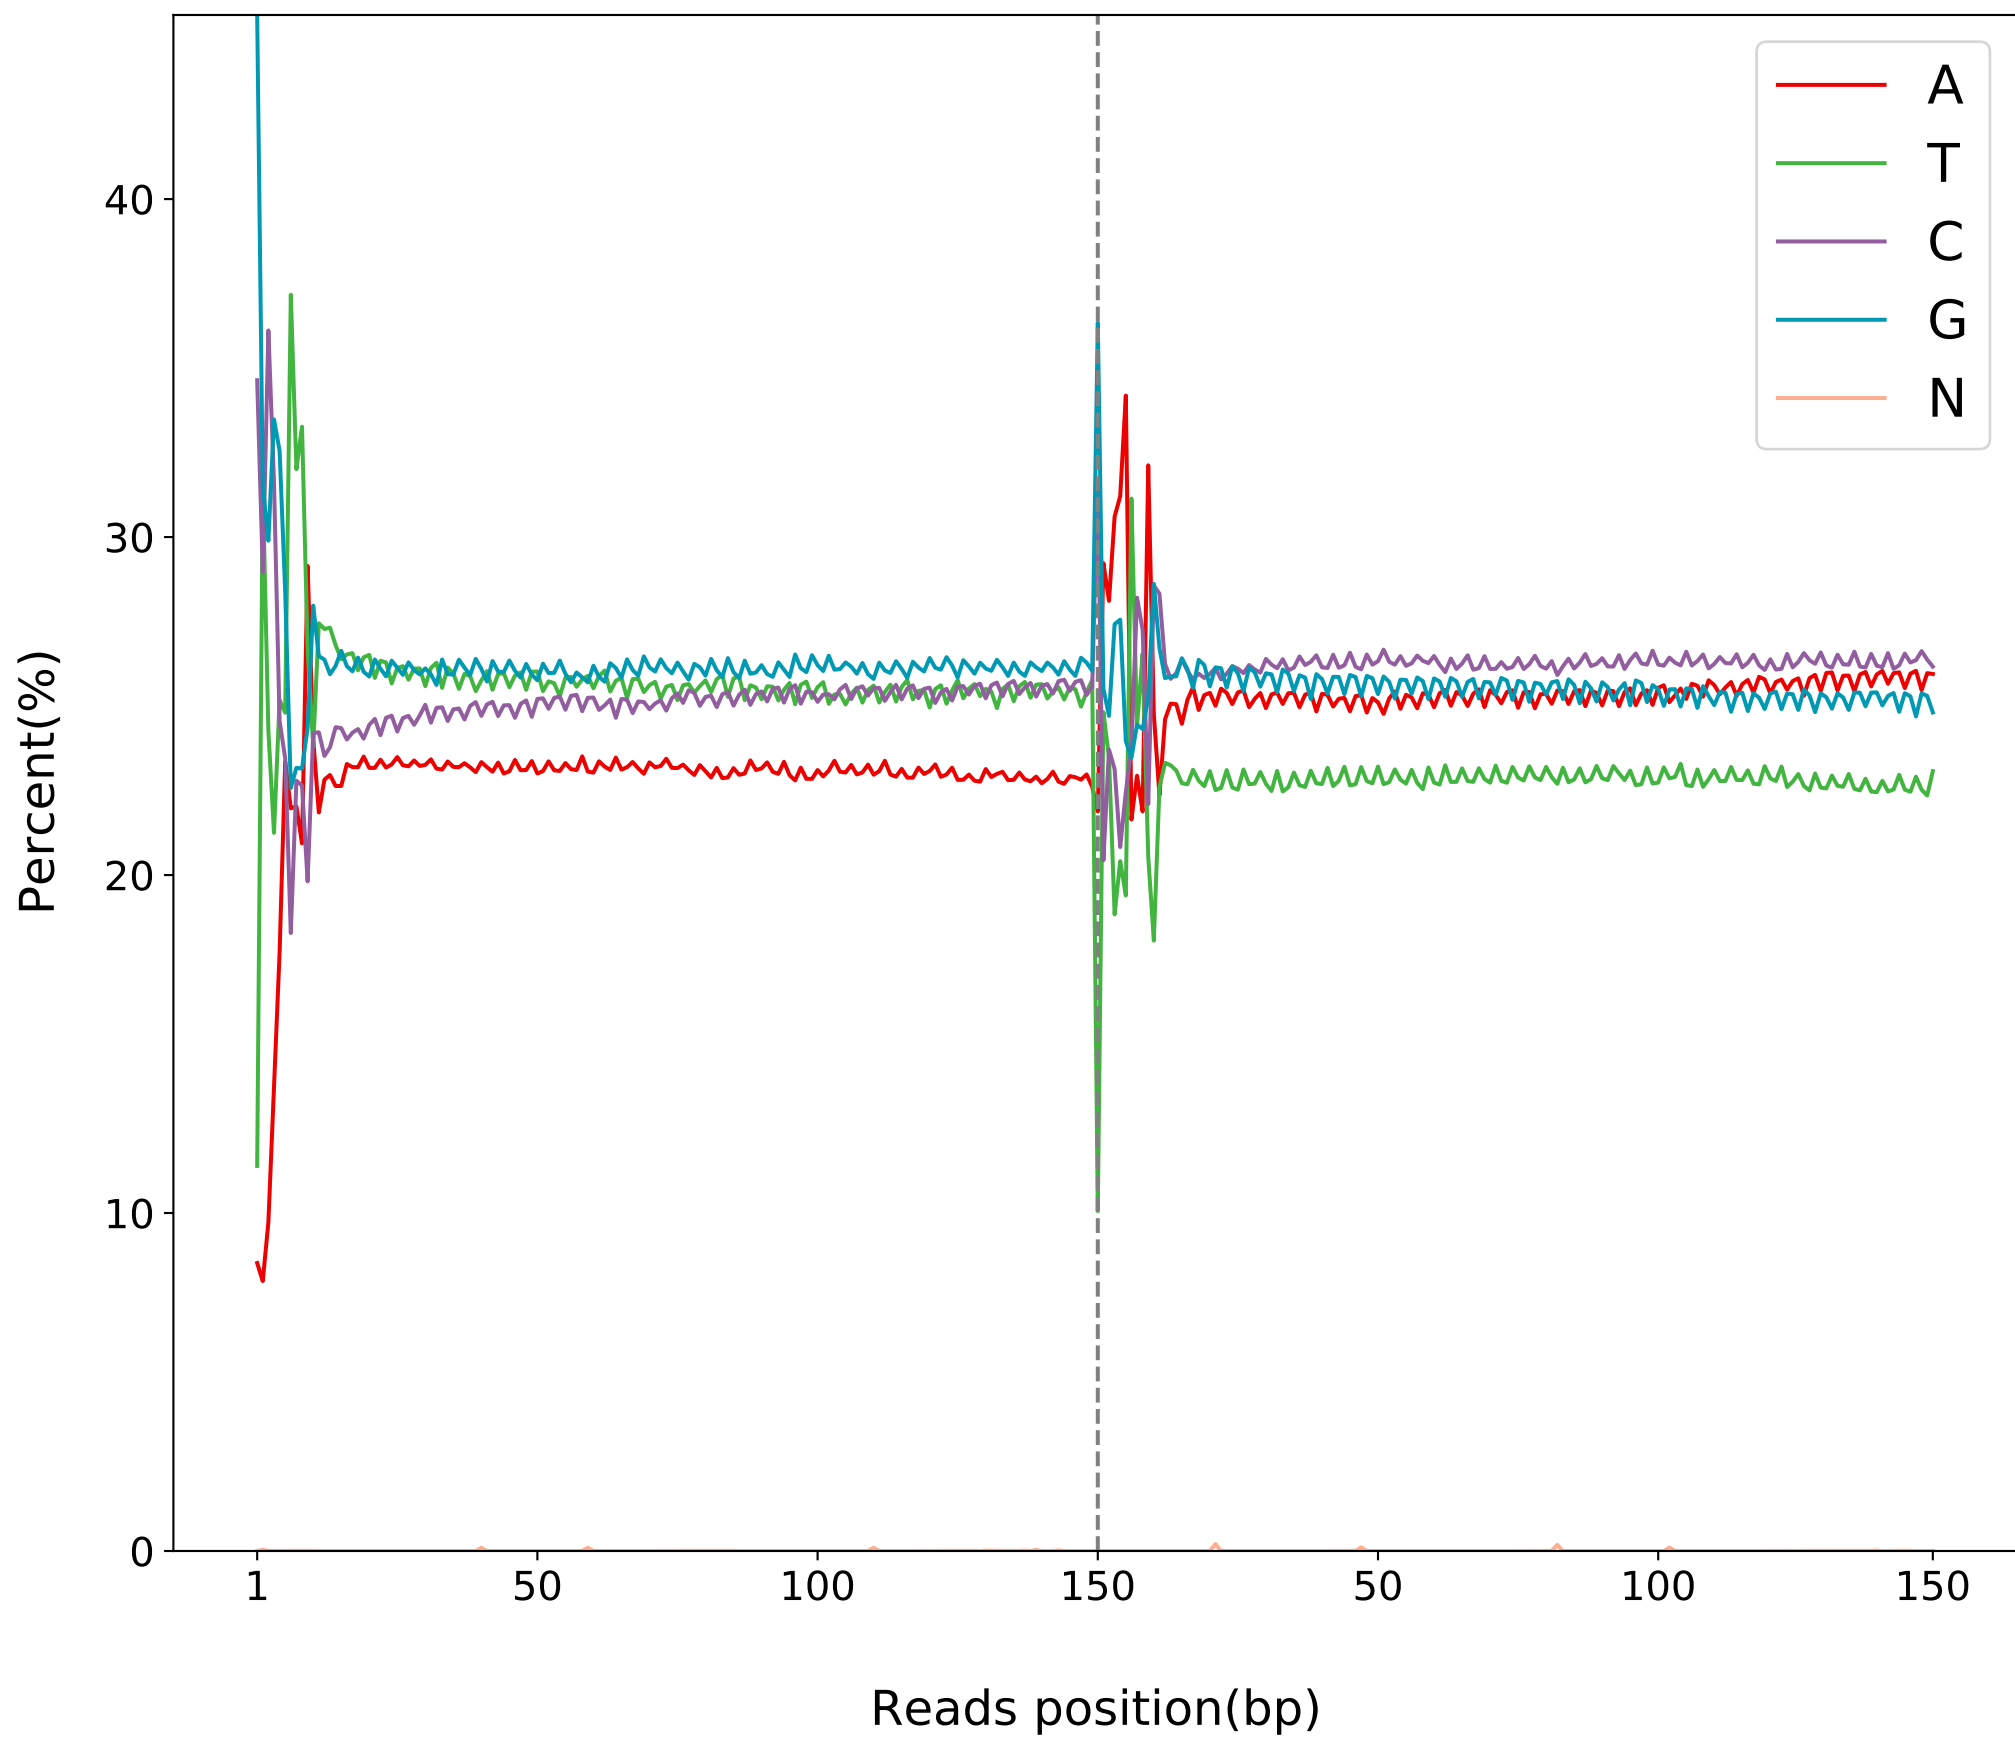

Supplement: Supplementary file 527 [file C2.cleandata.base.pdf › Source data/1.RNA-Seq source data/2.HUVECs/result/2.quality_control/2.1.fastqc/C2.cleandata.base.pdf]

# Quality distribution of C2

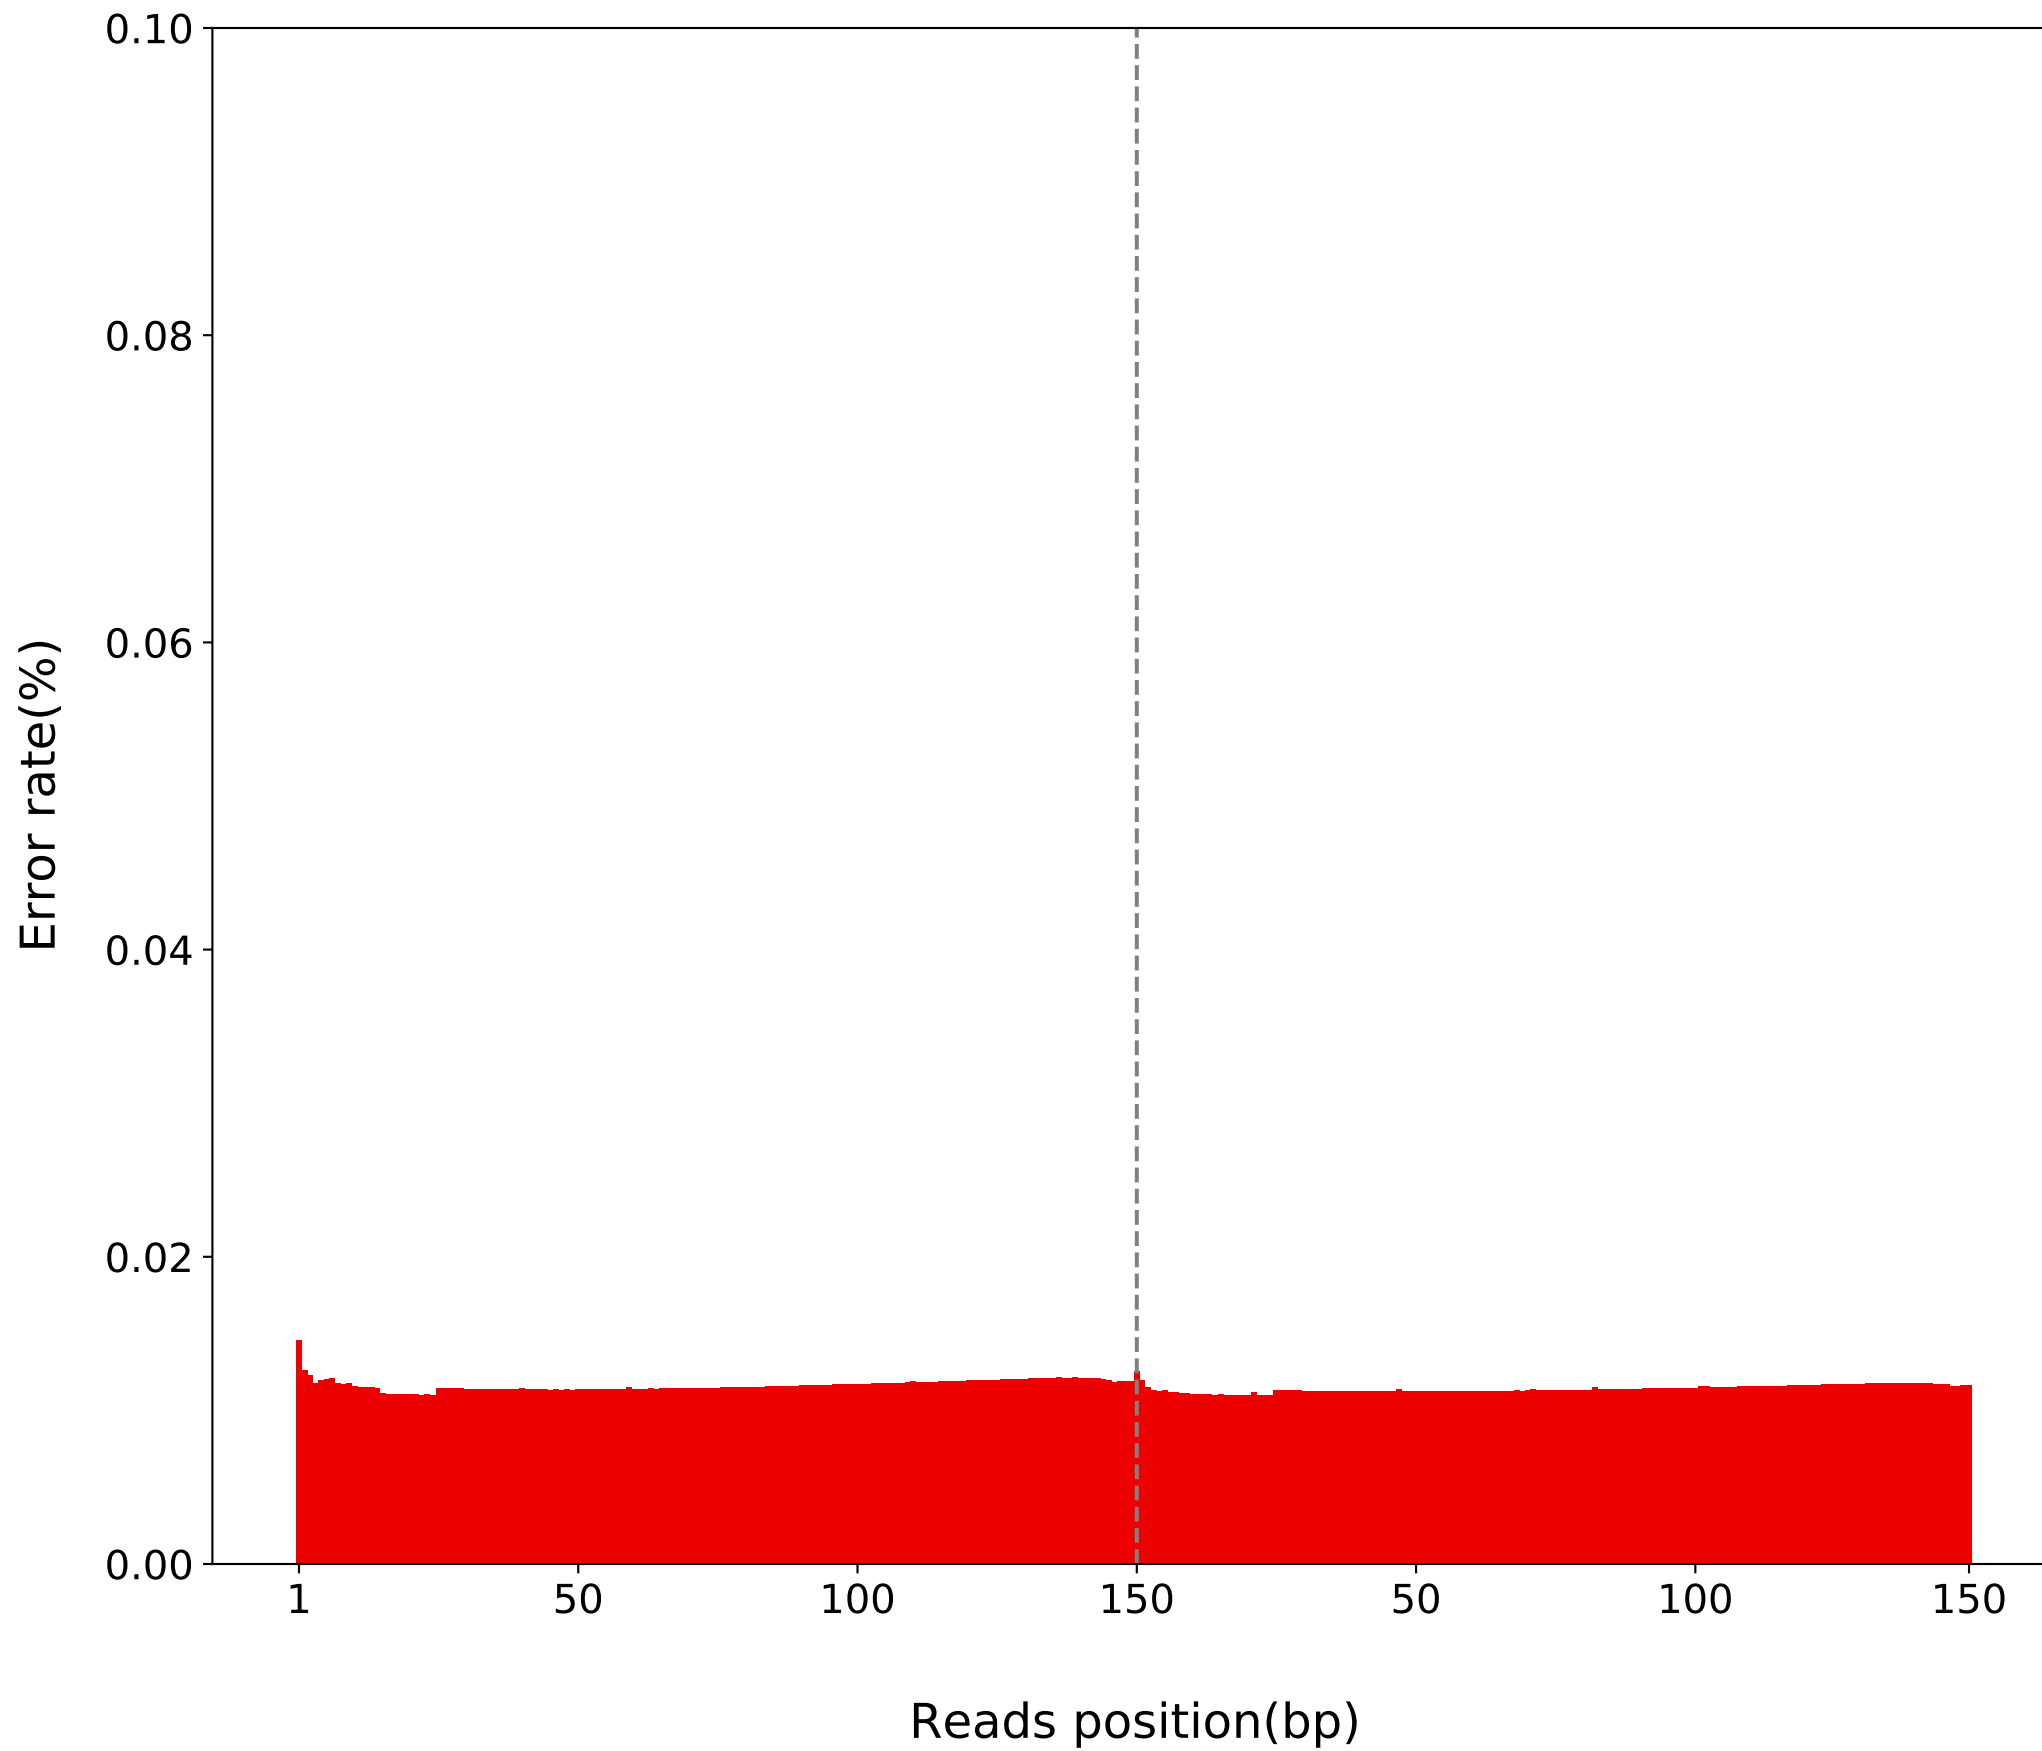

Supplement: Supplementary file 528 [file C2.cleandata.qual.pdf › Source data/1.RNA-Seq source data/2.HUVECs/result/2.quality_control/2.1.fastqc/C2.cleandata.qual.pdf]

# Base distribution of C3

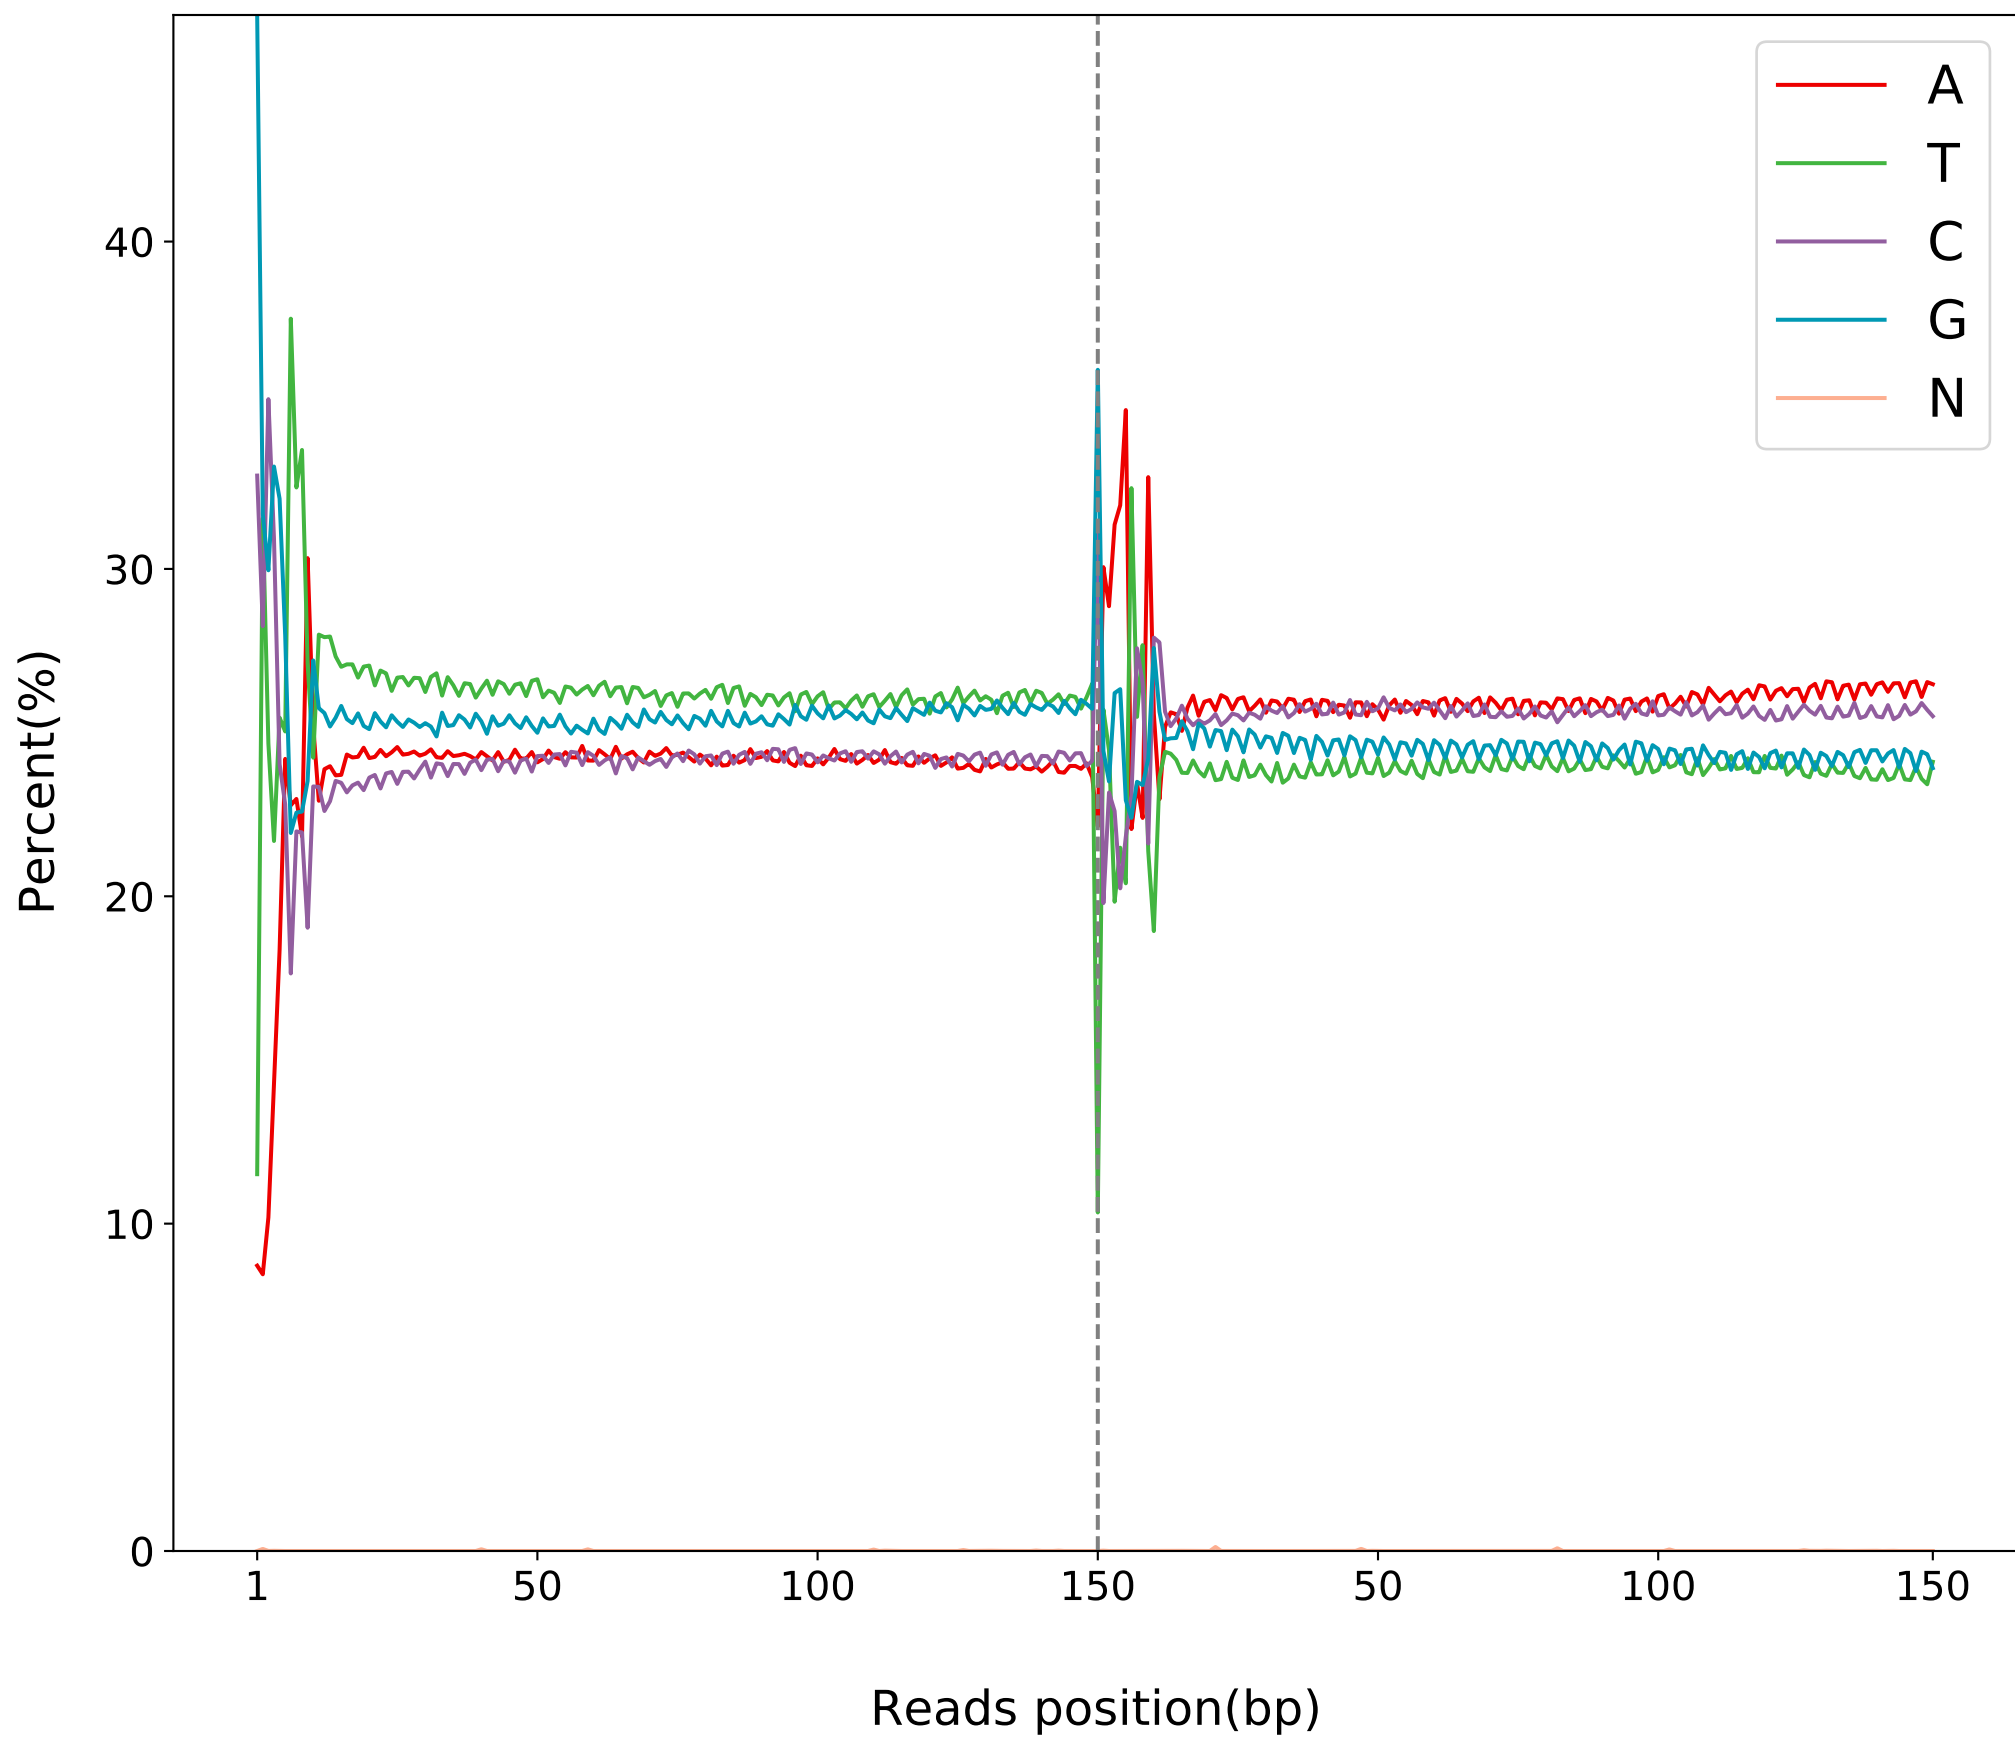

Supplement: Supplementary file 529 [file C3.cleandata.base.pdf › Source data/1.RNA-Seq source data/2.HUVECs/result/2.quality_control/2.1.fastqc/C3.cleandata.base.pdf]

# Quality distribution of C3

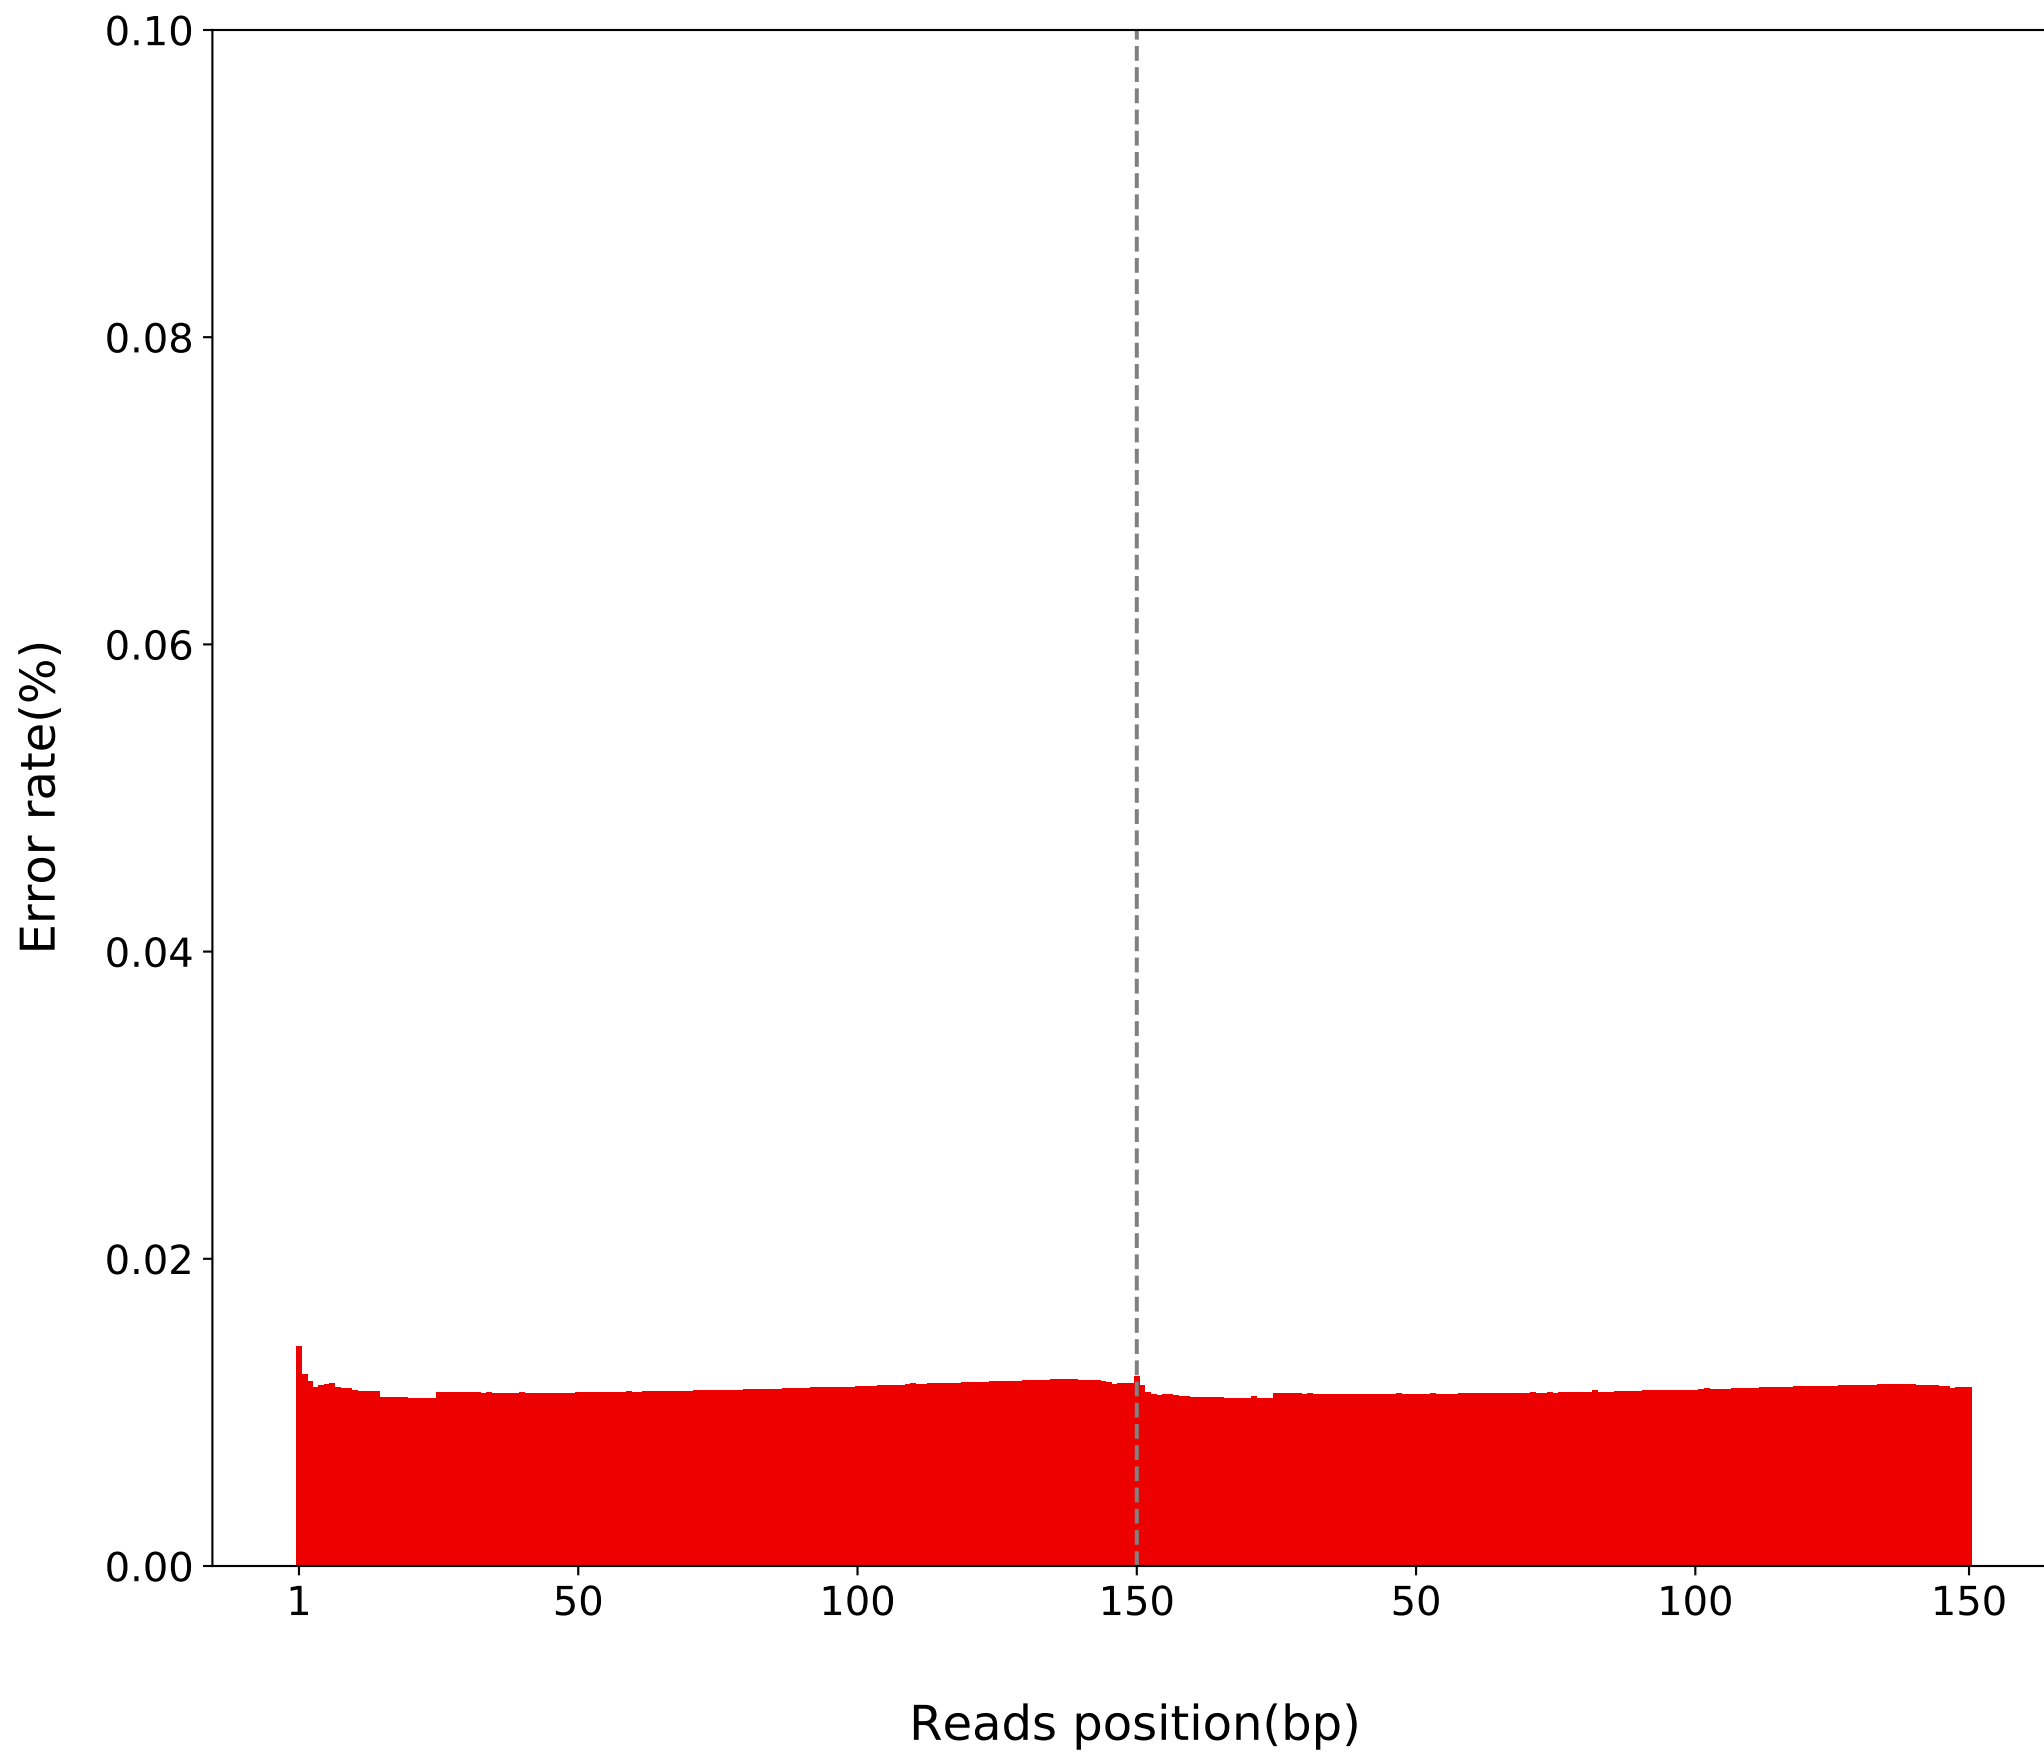

Supplement: Supplementary file 530 [file C3.cleandata.qual.pdf › Source data/1.RNA-Seq source data/2.HUVECs/result/2.quality_control/2.1.fastqc/C3.cleandata.qual.pdf]

# Base distribution of S1

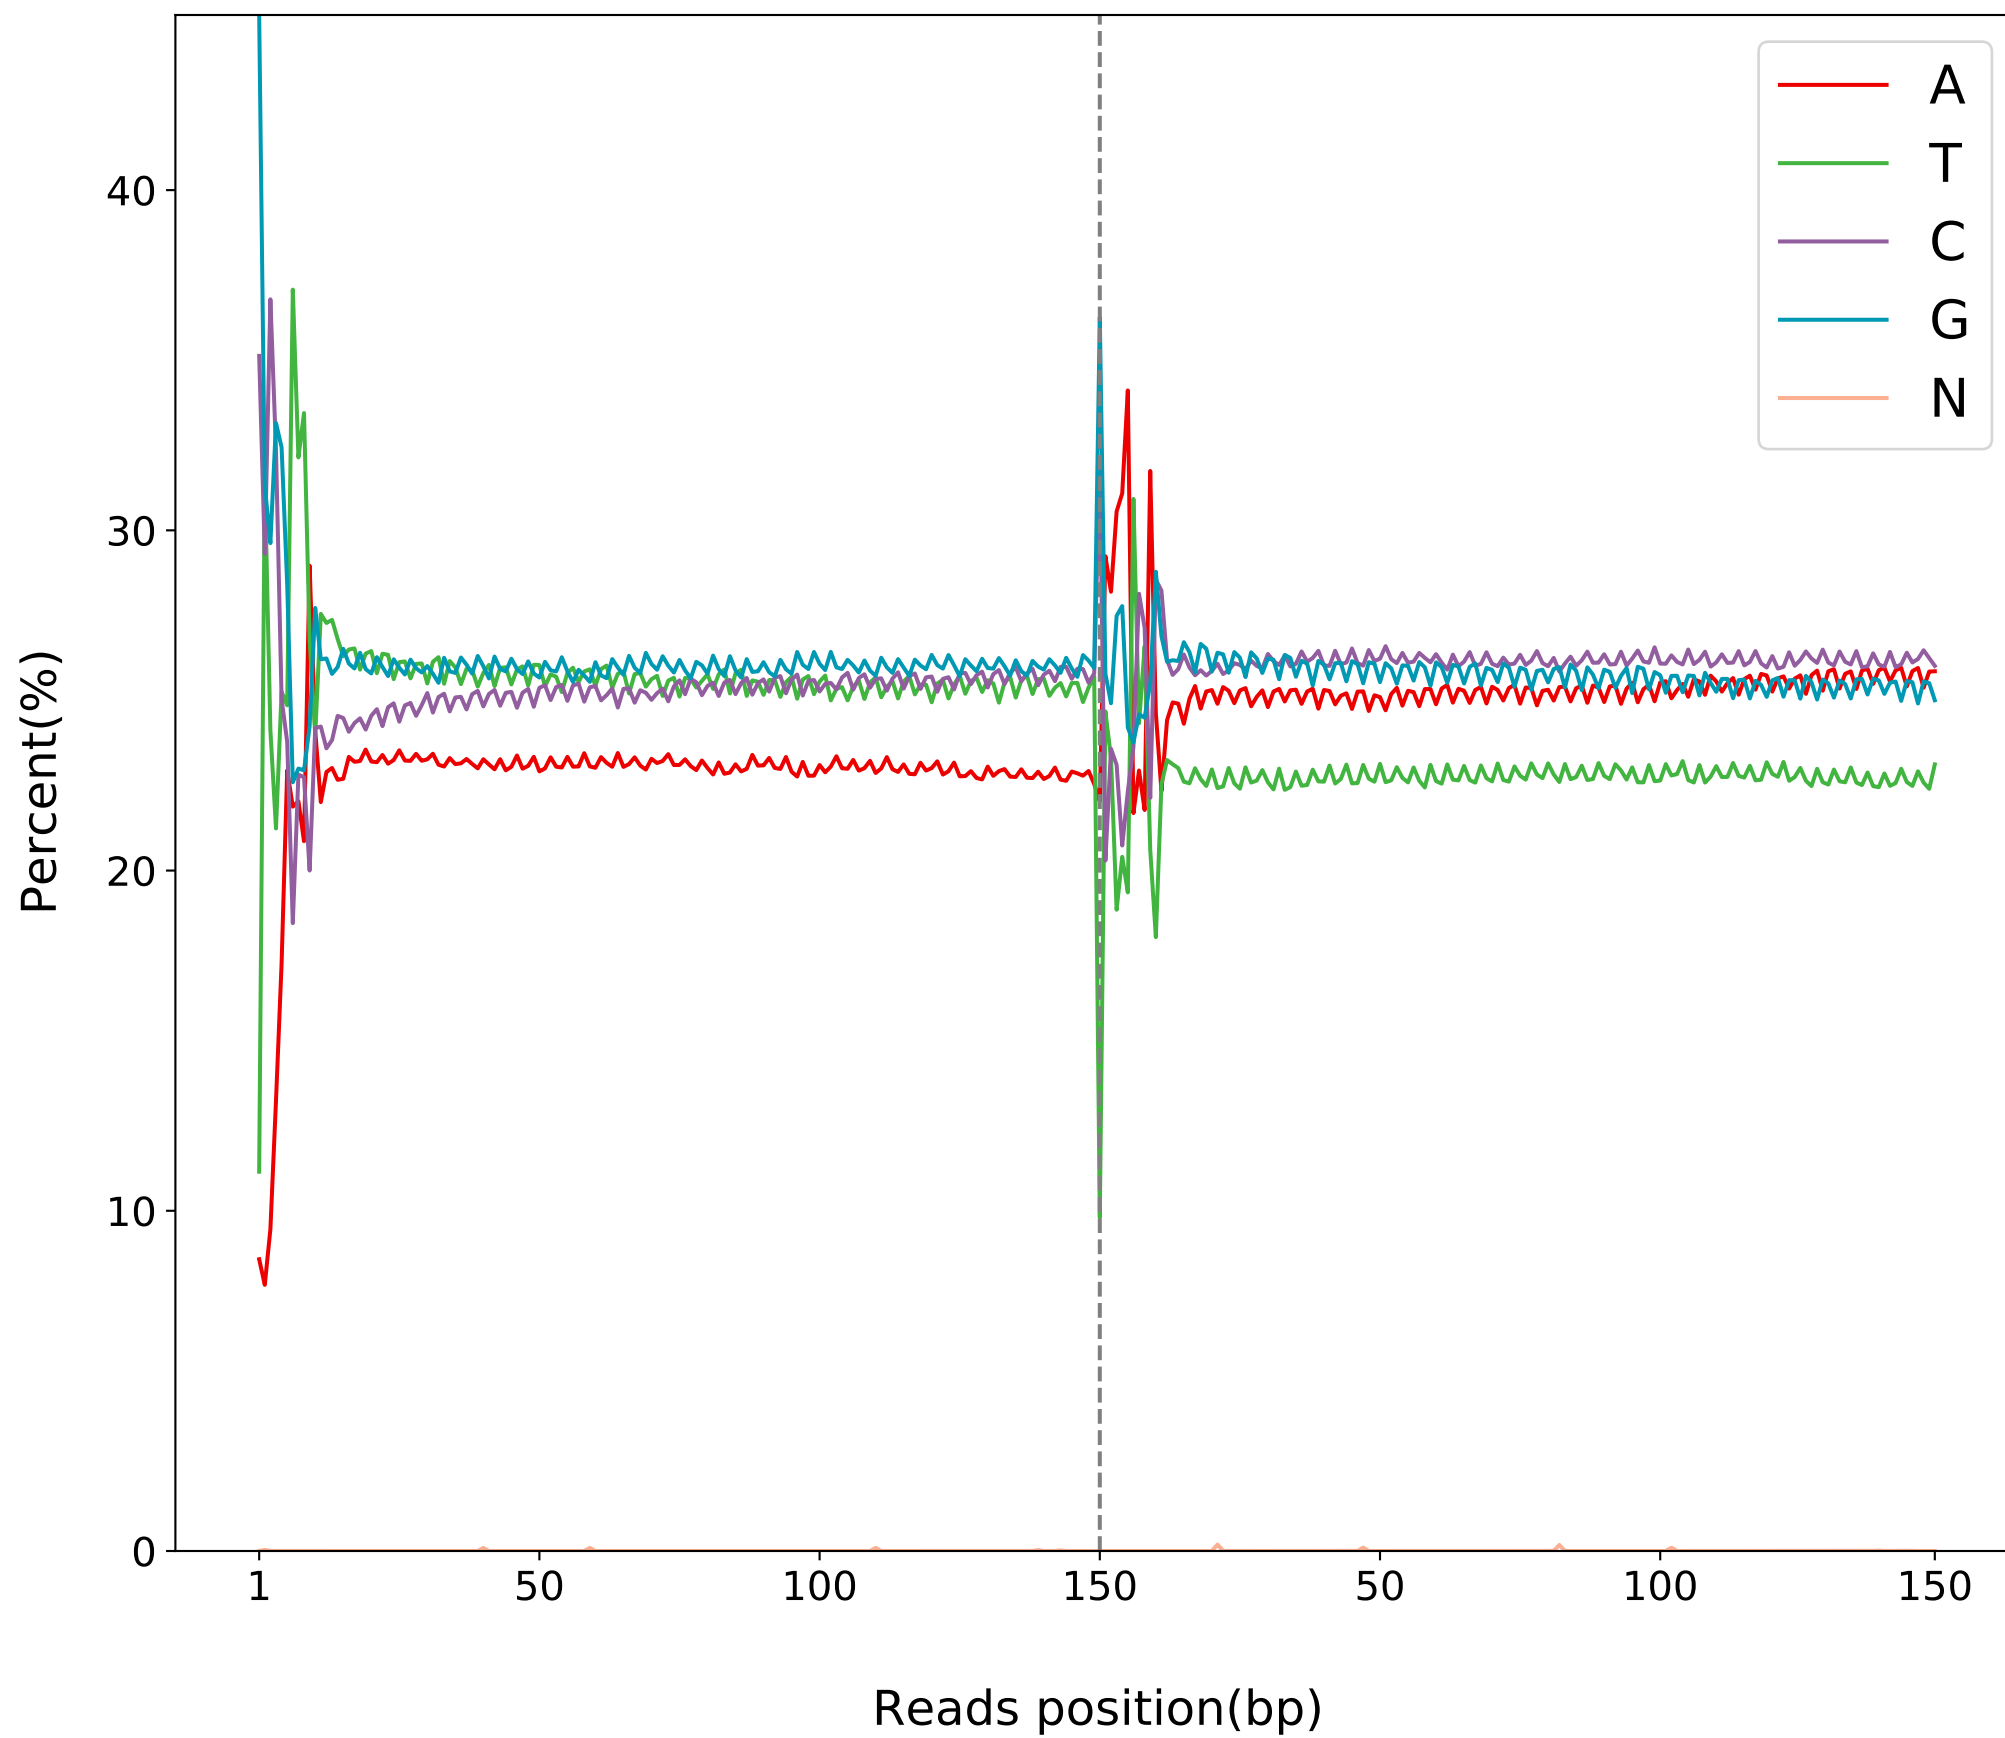

Supplement: Supplementary file 531 [file S1.cleandata.base.pdf › Source data/1.RNA-Seq source data/2.HUVECs/result/2.quality_control/2.1.fastqc/S1.cleandata.base.pdf]

# Quality distribution of S1

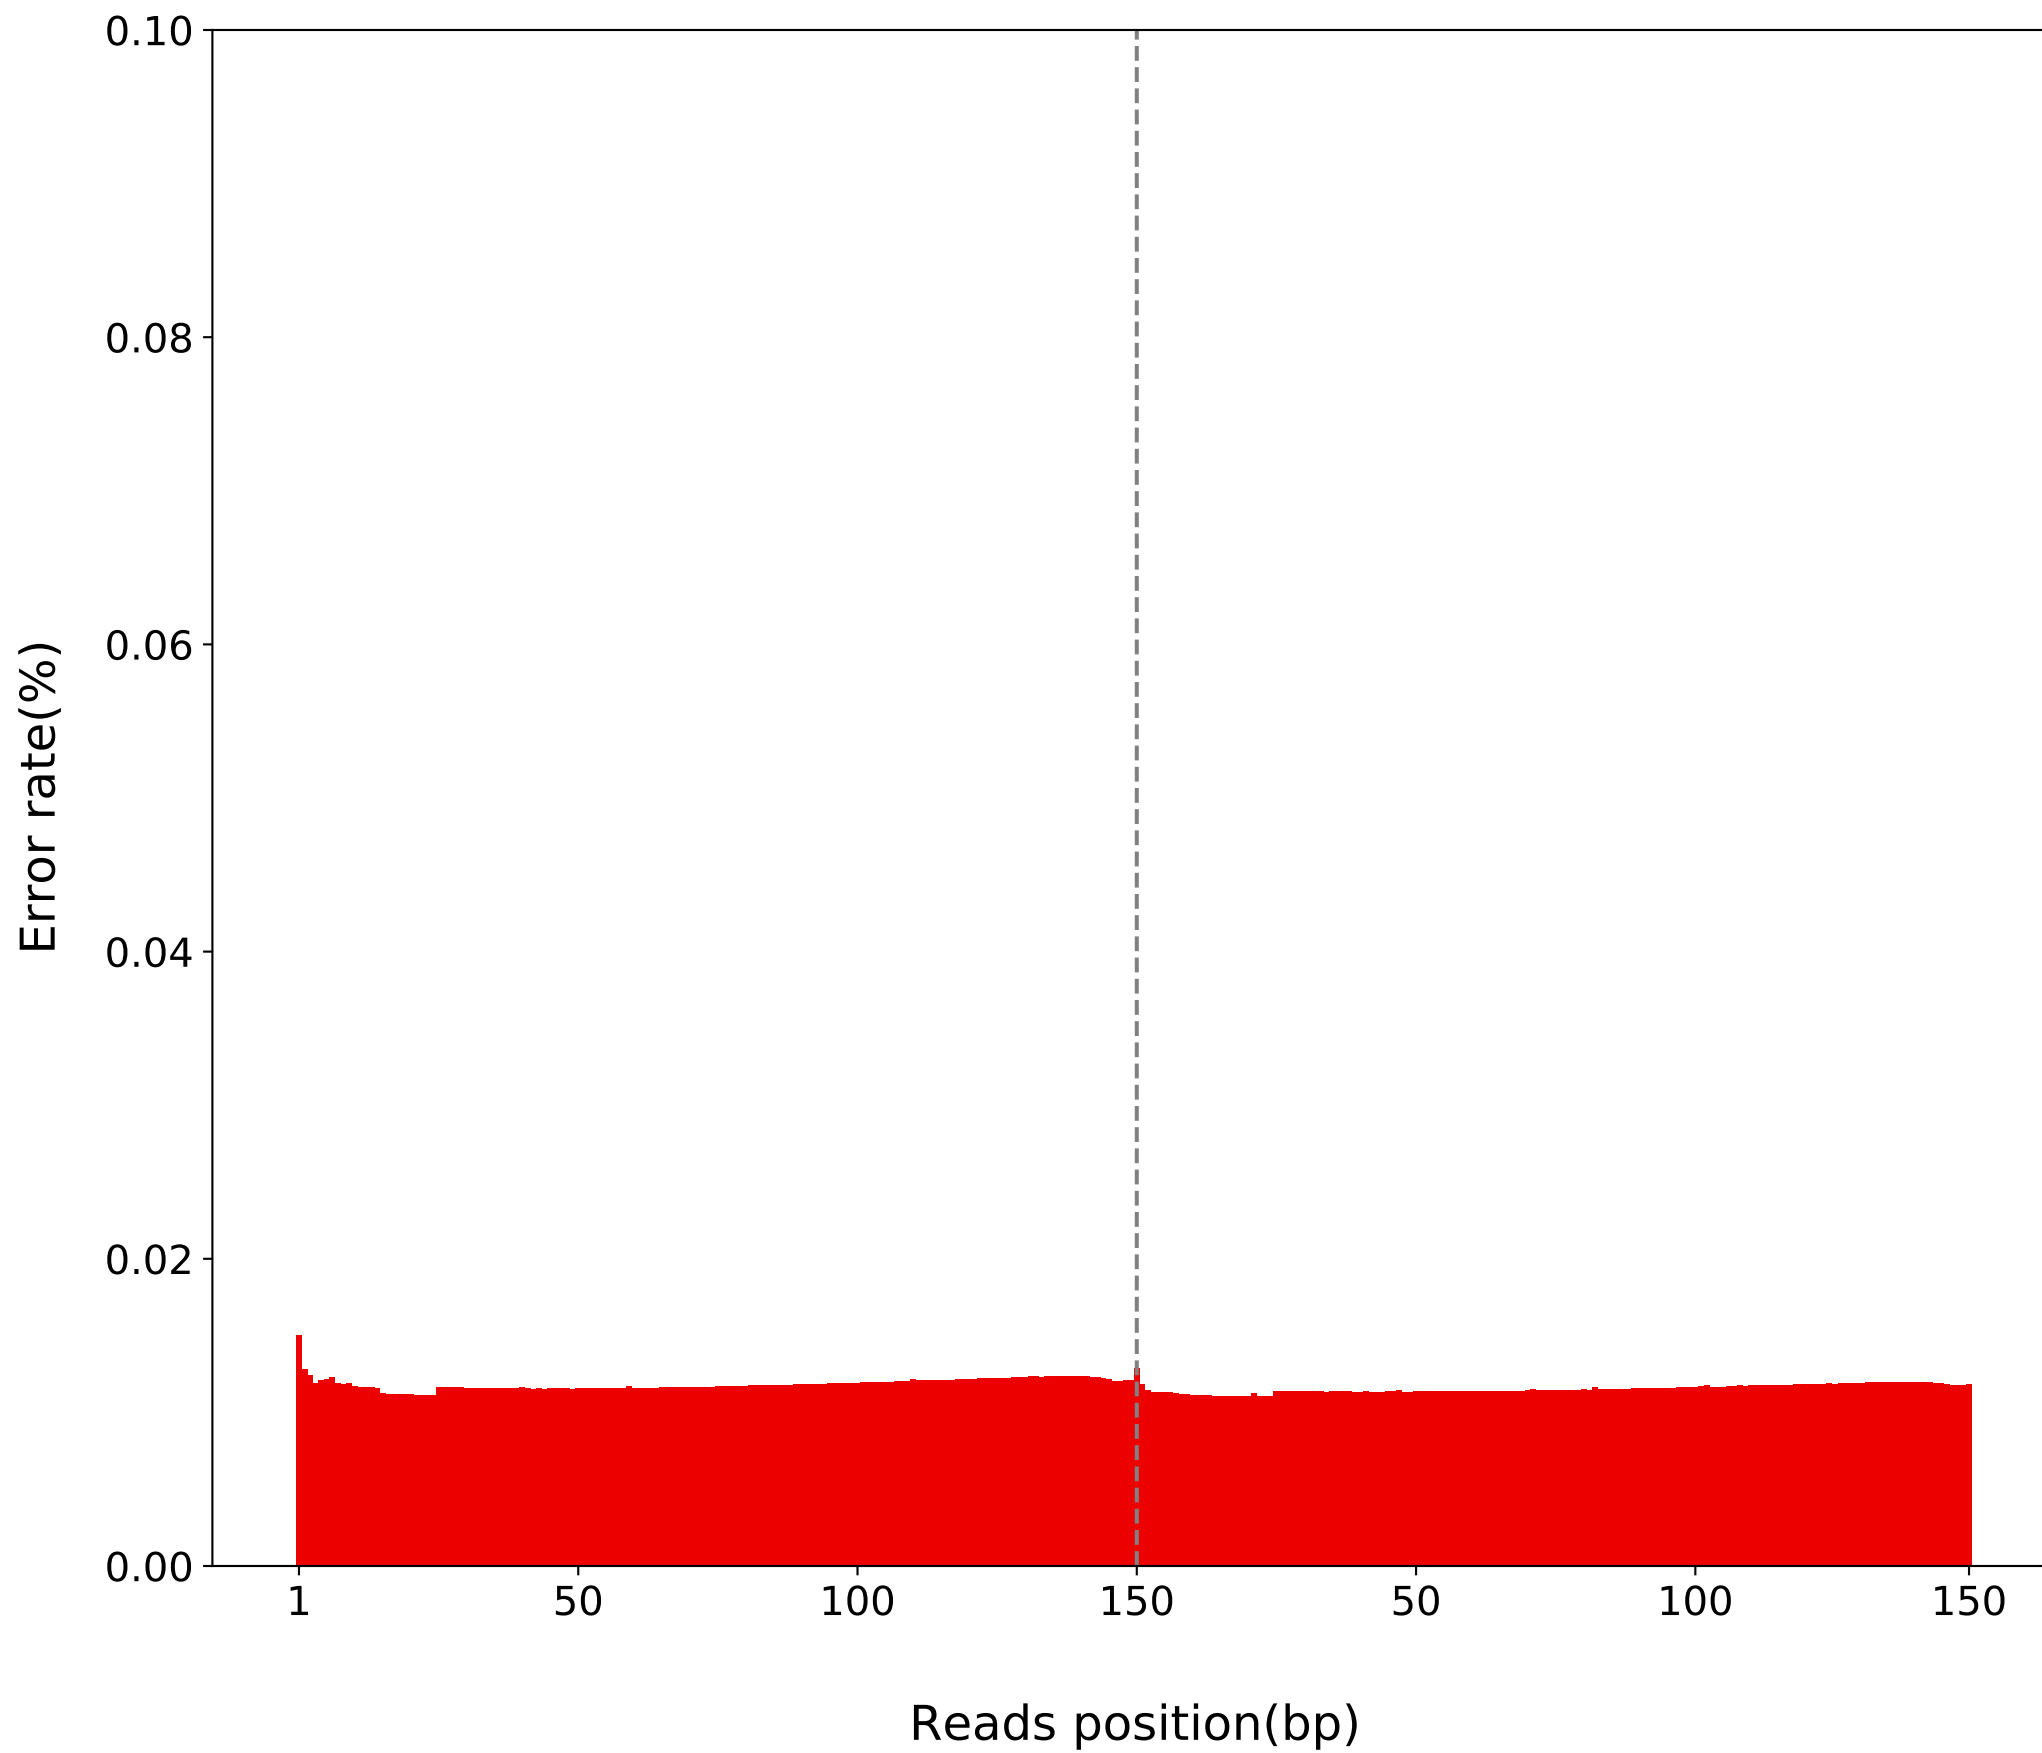

Supplement: Supplementary file 532 [file S1.cleandata.qual.pdf › Source data/1.RNA-Seq source data/2.HUVECs/result/2.quality_control/2.1.fastqc/S1.cleandata.qual.pdf]

# Base distribution of S2

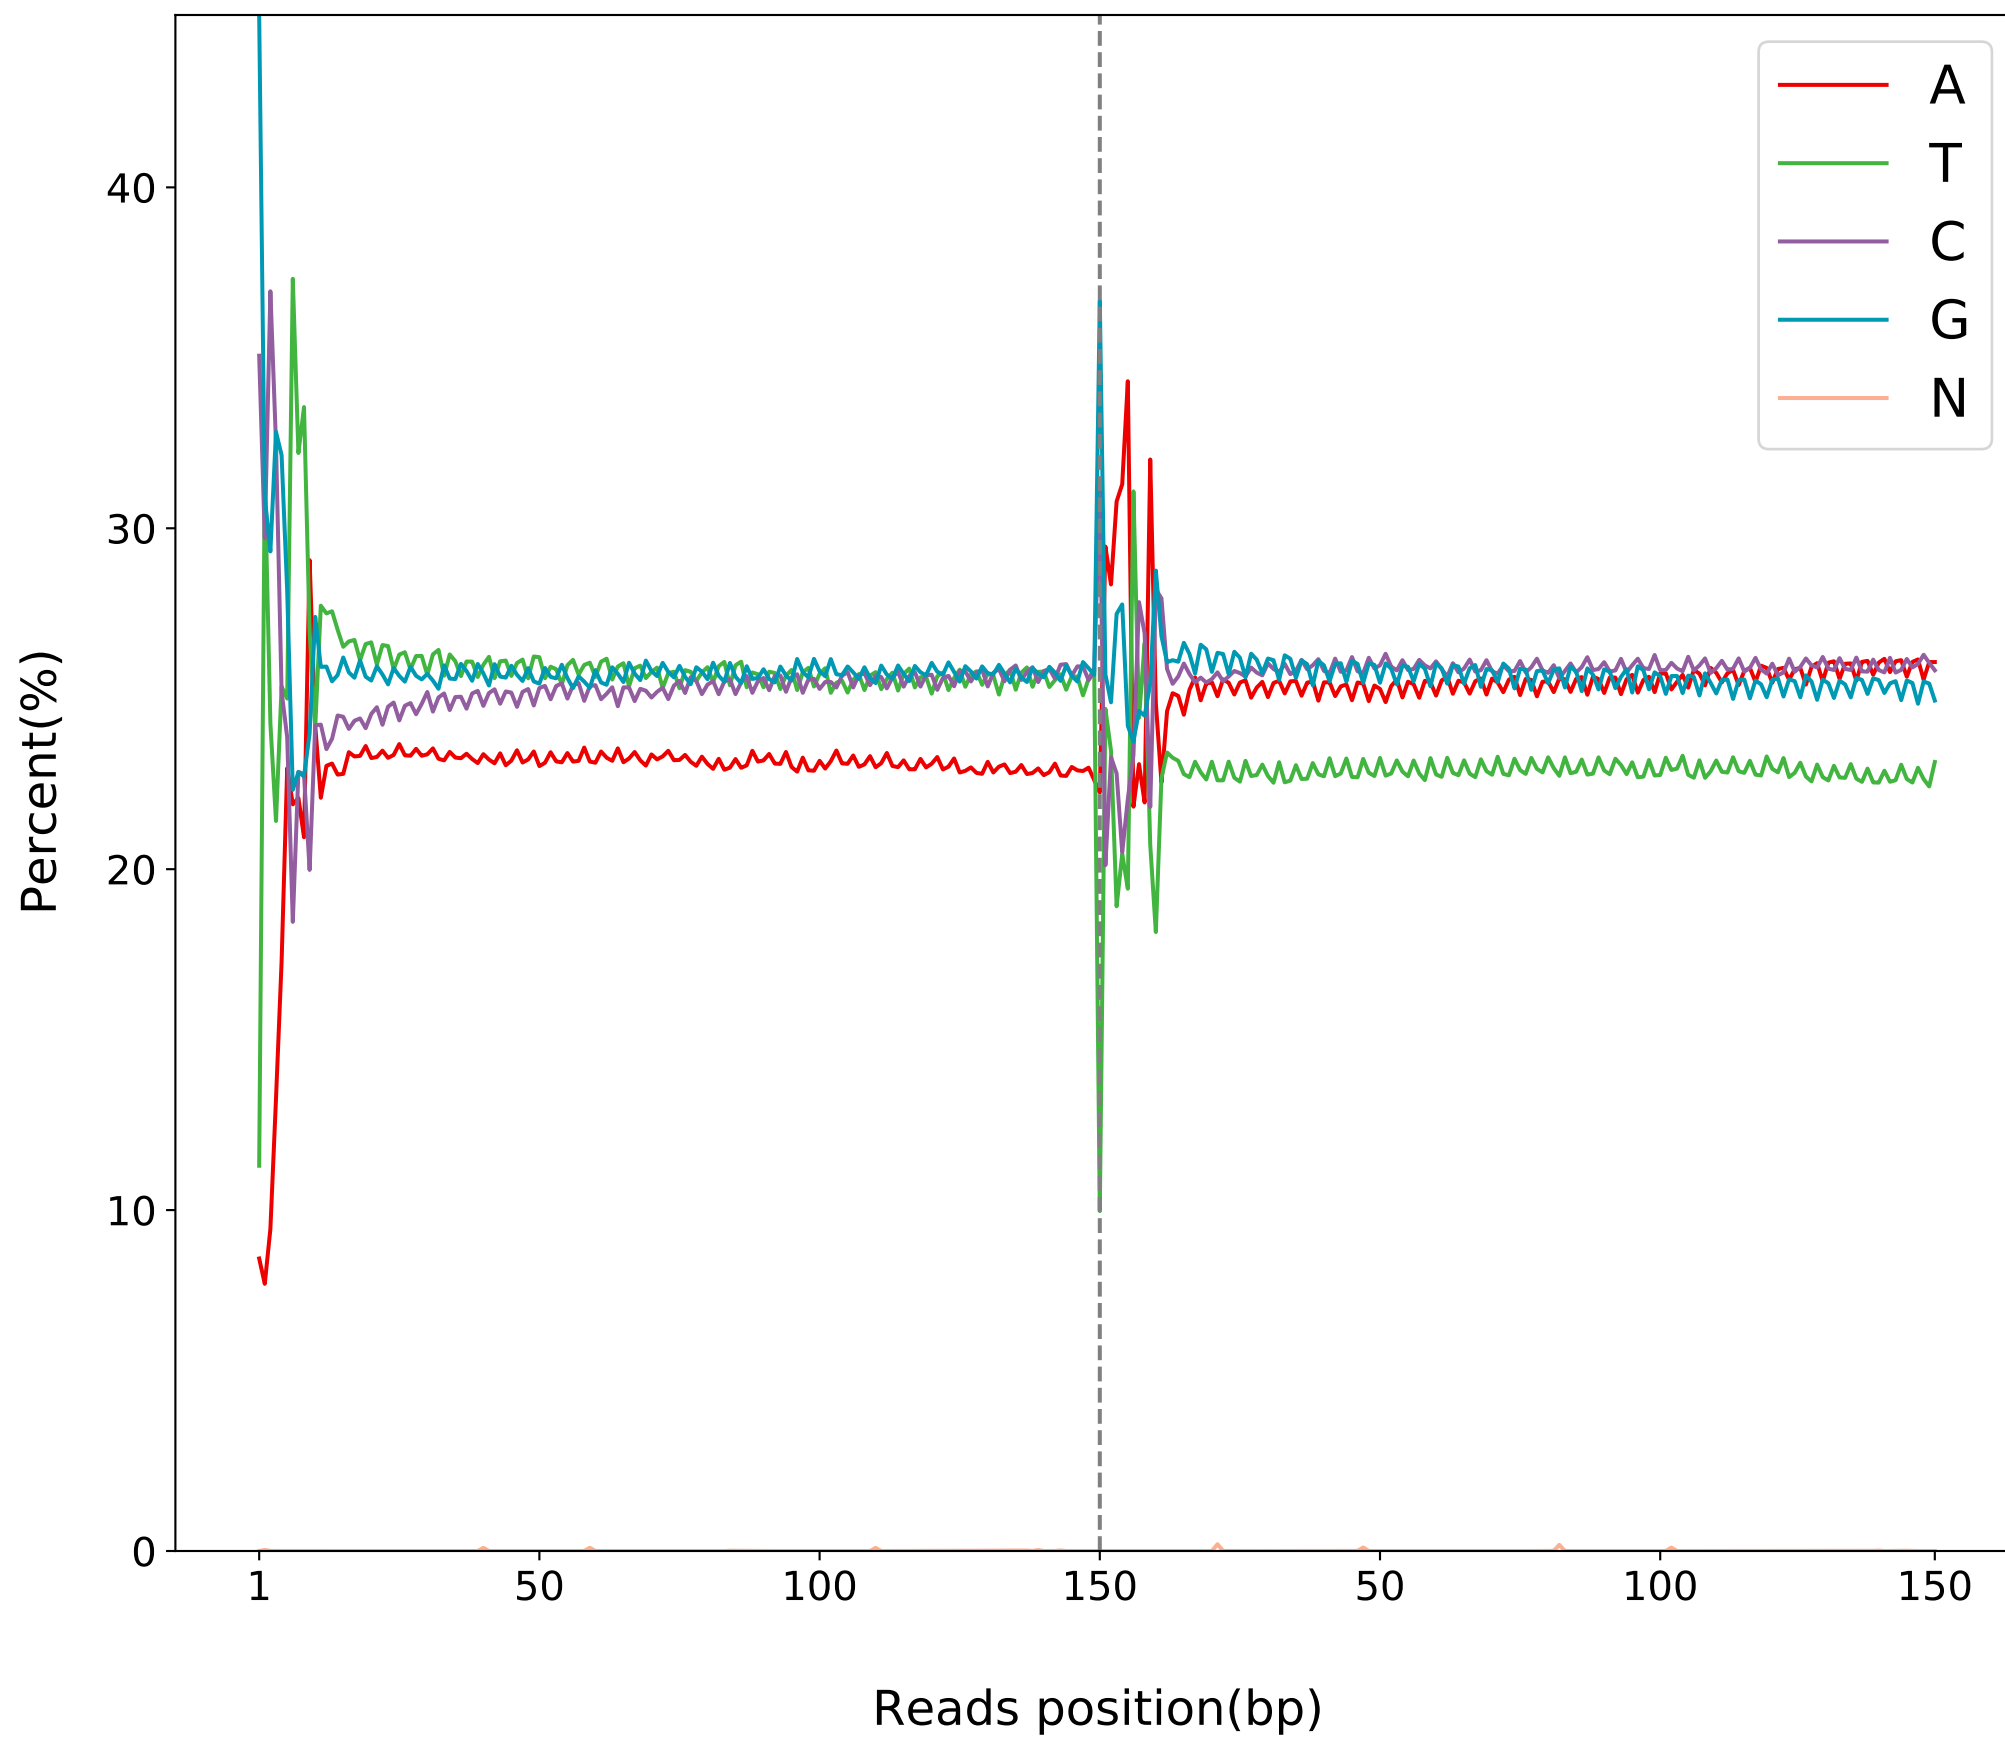

Supplement: Supplementary file 533 [file S2.cleandata.base.pdf › Source data/1.RNA-Seq source data/2.HUVECs/result/2.quality_control/2.1.fastqc/S2.cleandata.base.pdf]

# Quality distribution of S2

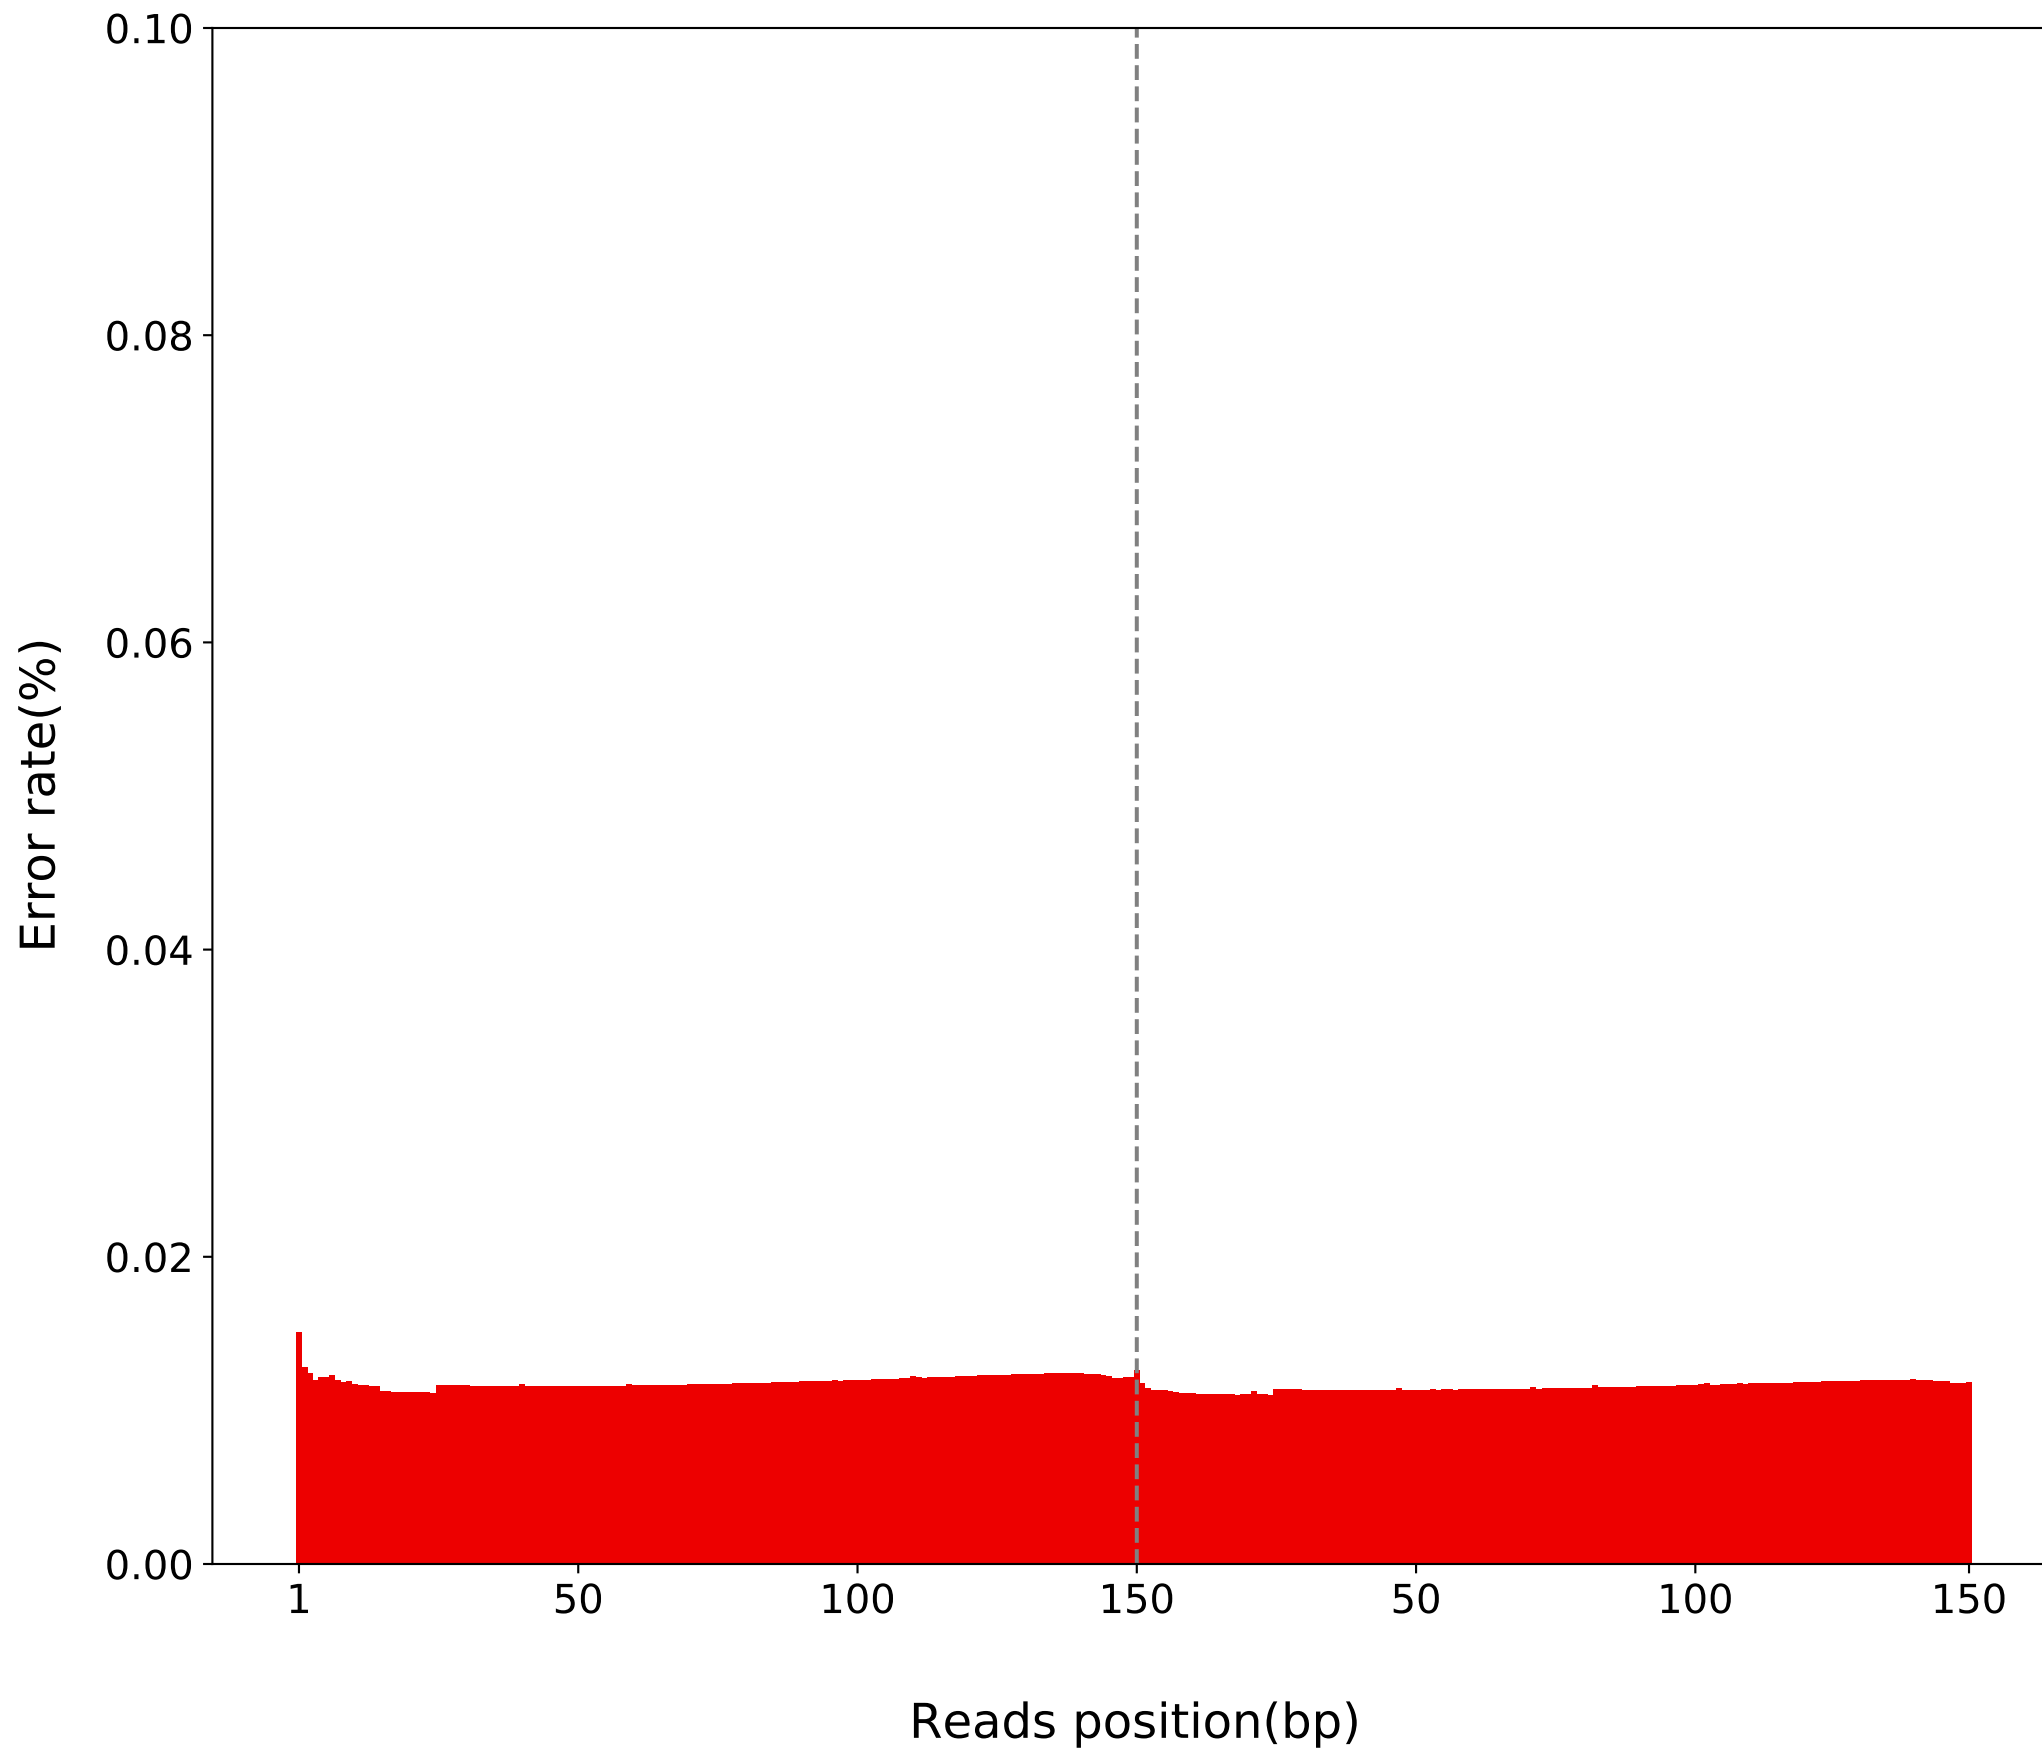

Supplement: Supplementary file 534 [file S2.cleandata.qual.pdf › Source data/1.RNA-Seq source data/2.HUVECs/result/2.quality_control/2.1.fastqc/S2.cleandata.qual.pdf]

# Base distribution of S3

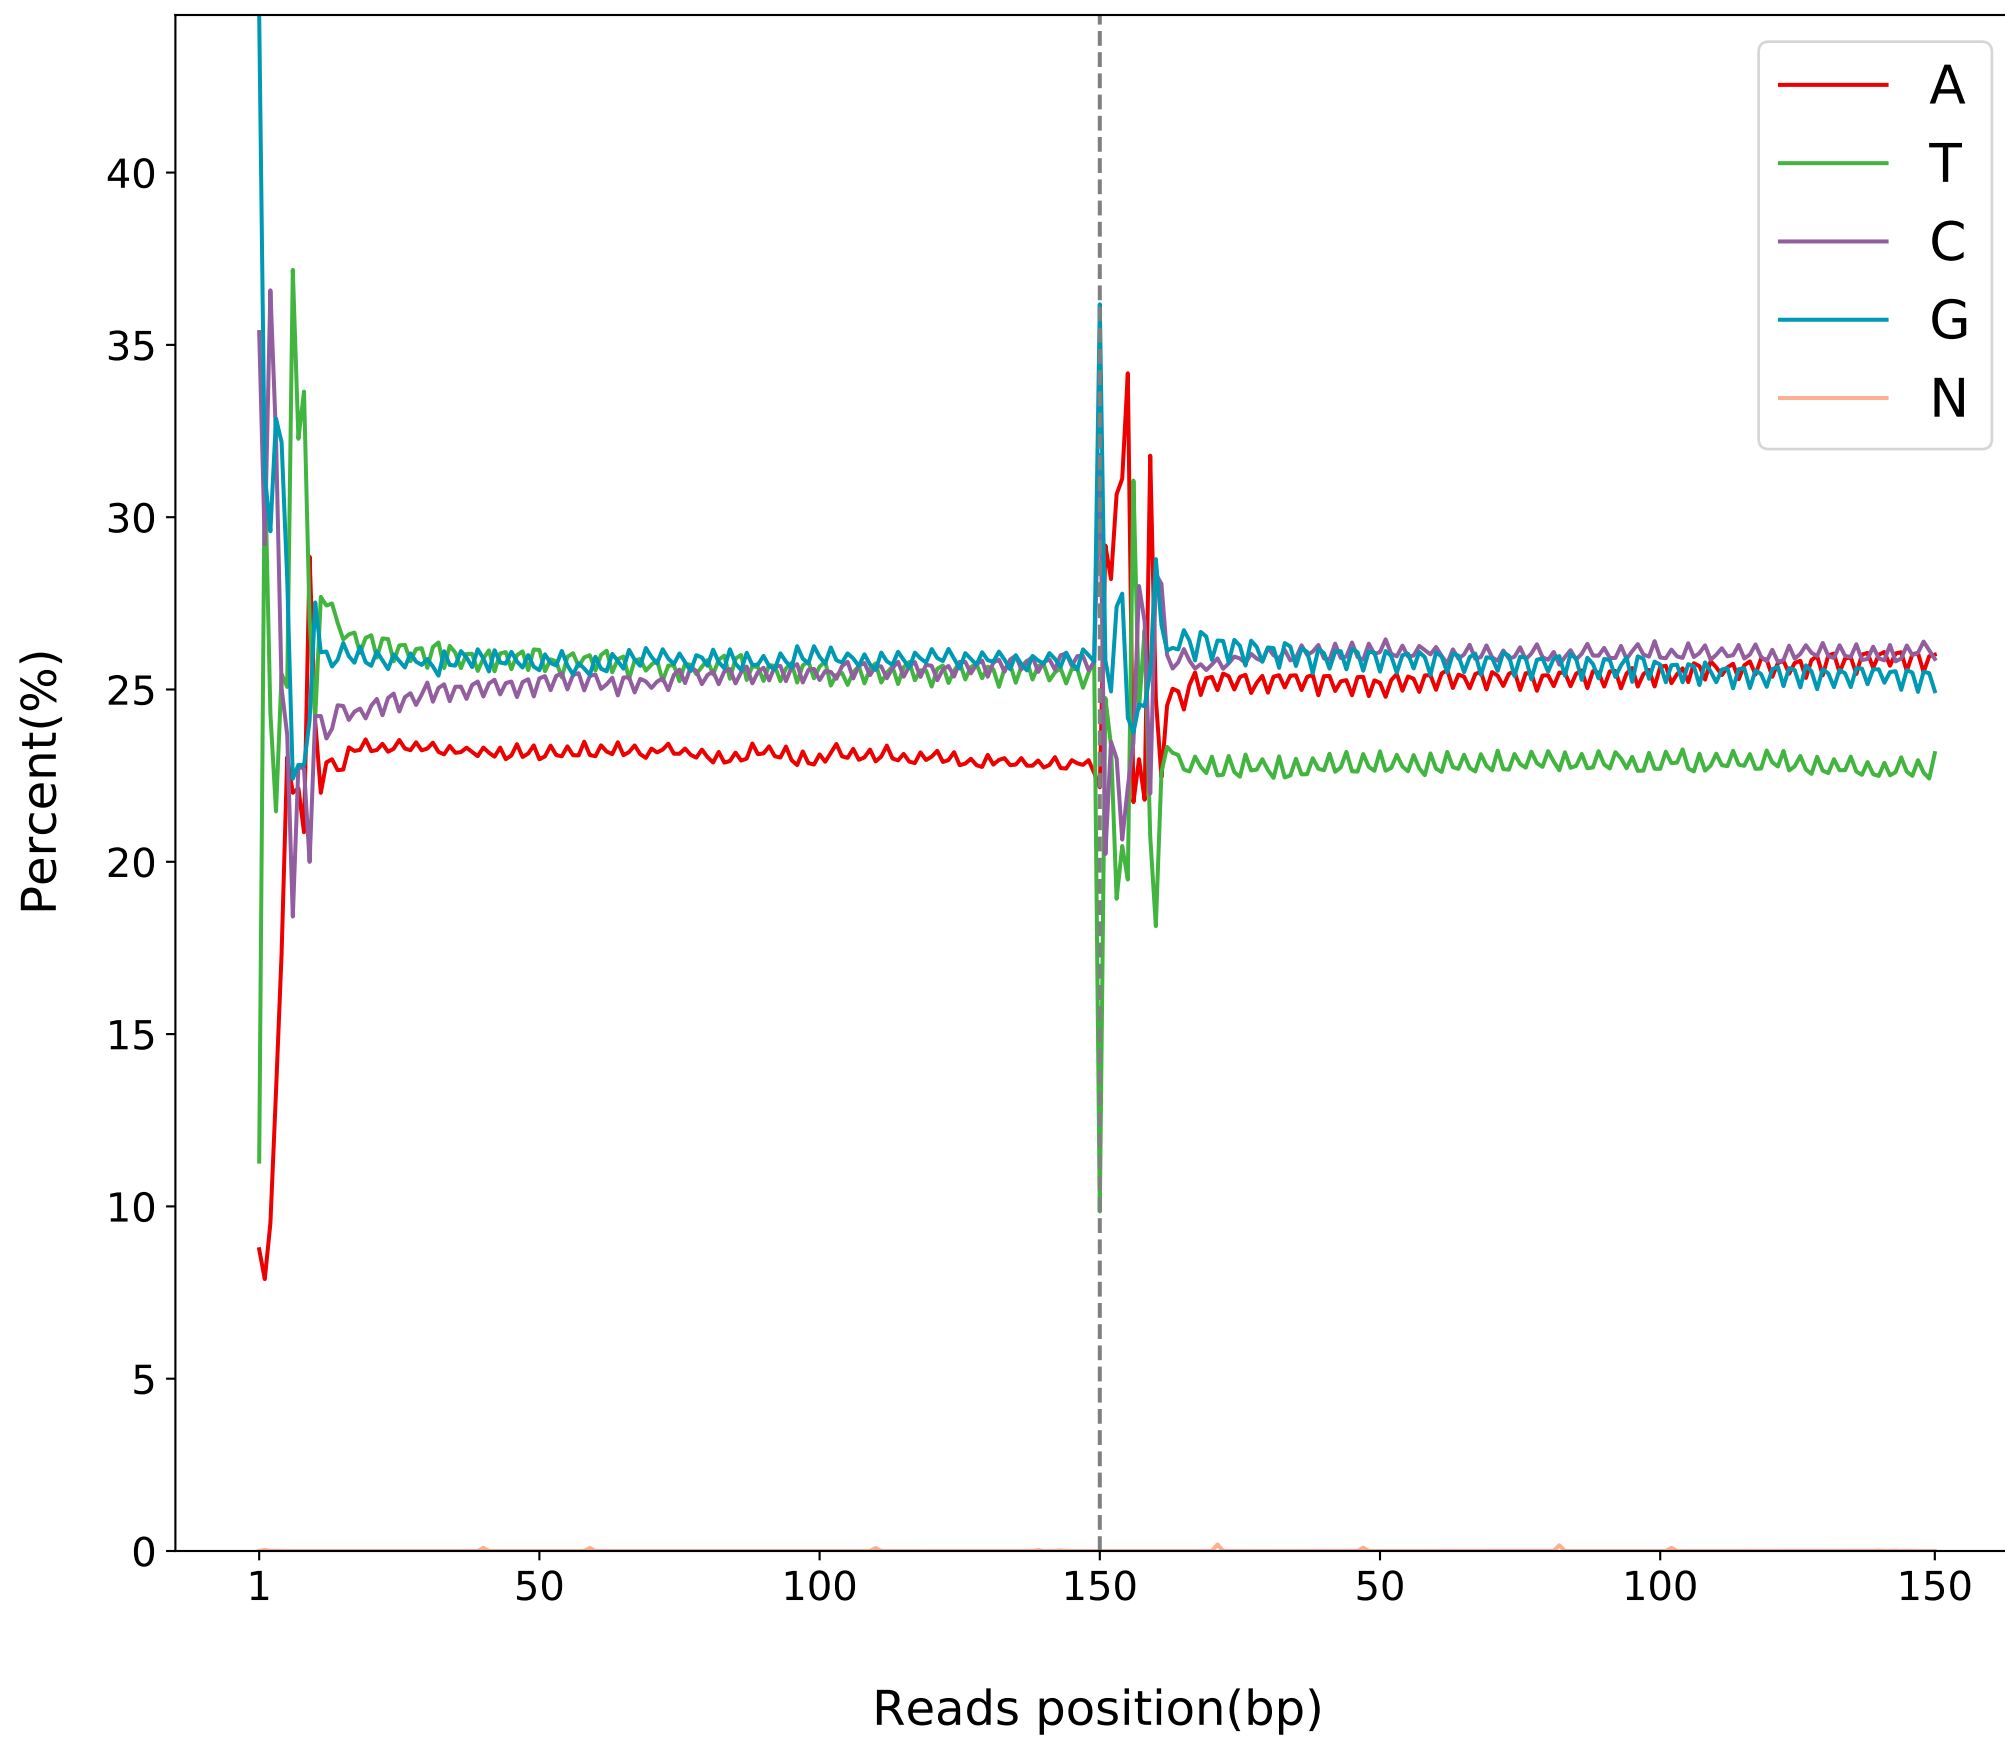

Supplement: Supplementary file 535 [file S3.cleandata.base.pdf › Source data/1.RNA-Seq source data/2.HUVECs/result/2.quality_control/2.1.fastqc/S3.cleandata.base.pdf]

# Quality distribution of S3

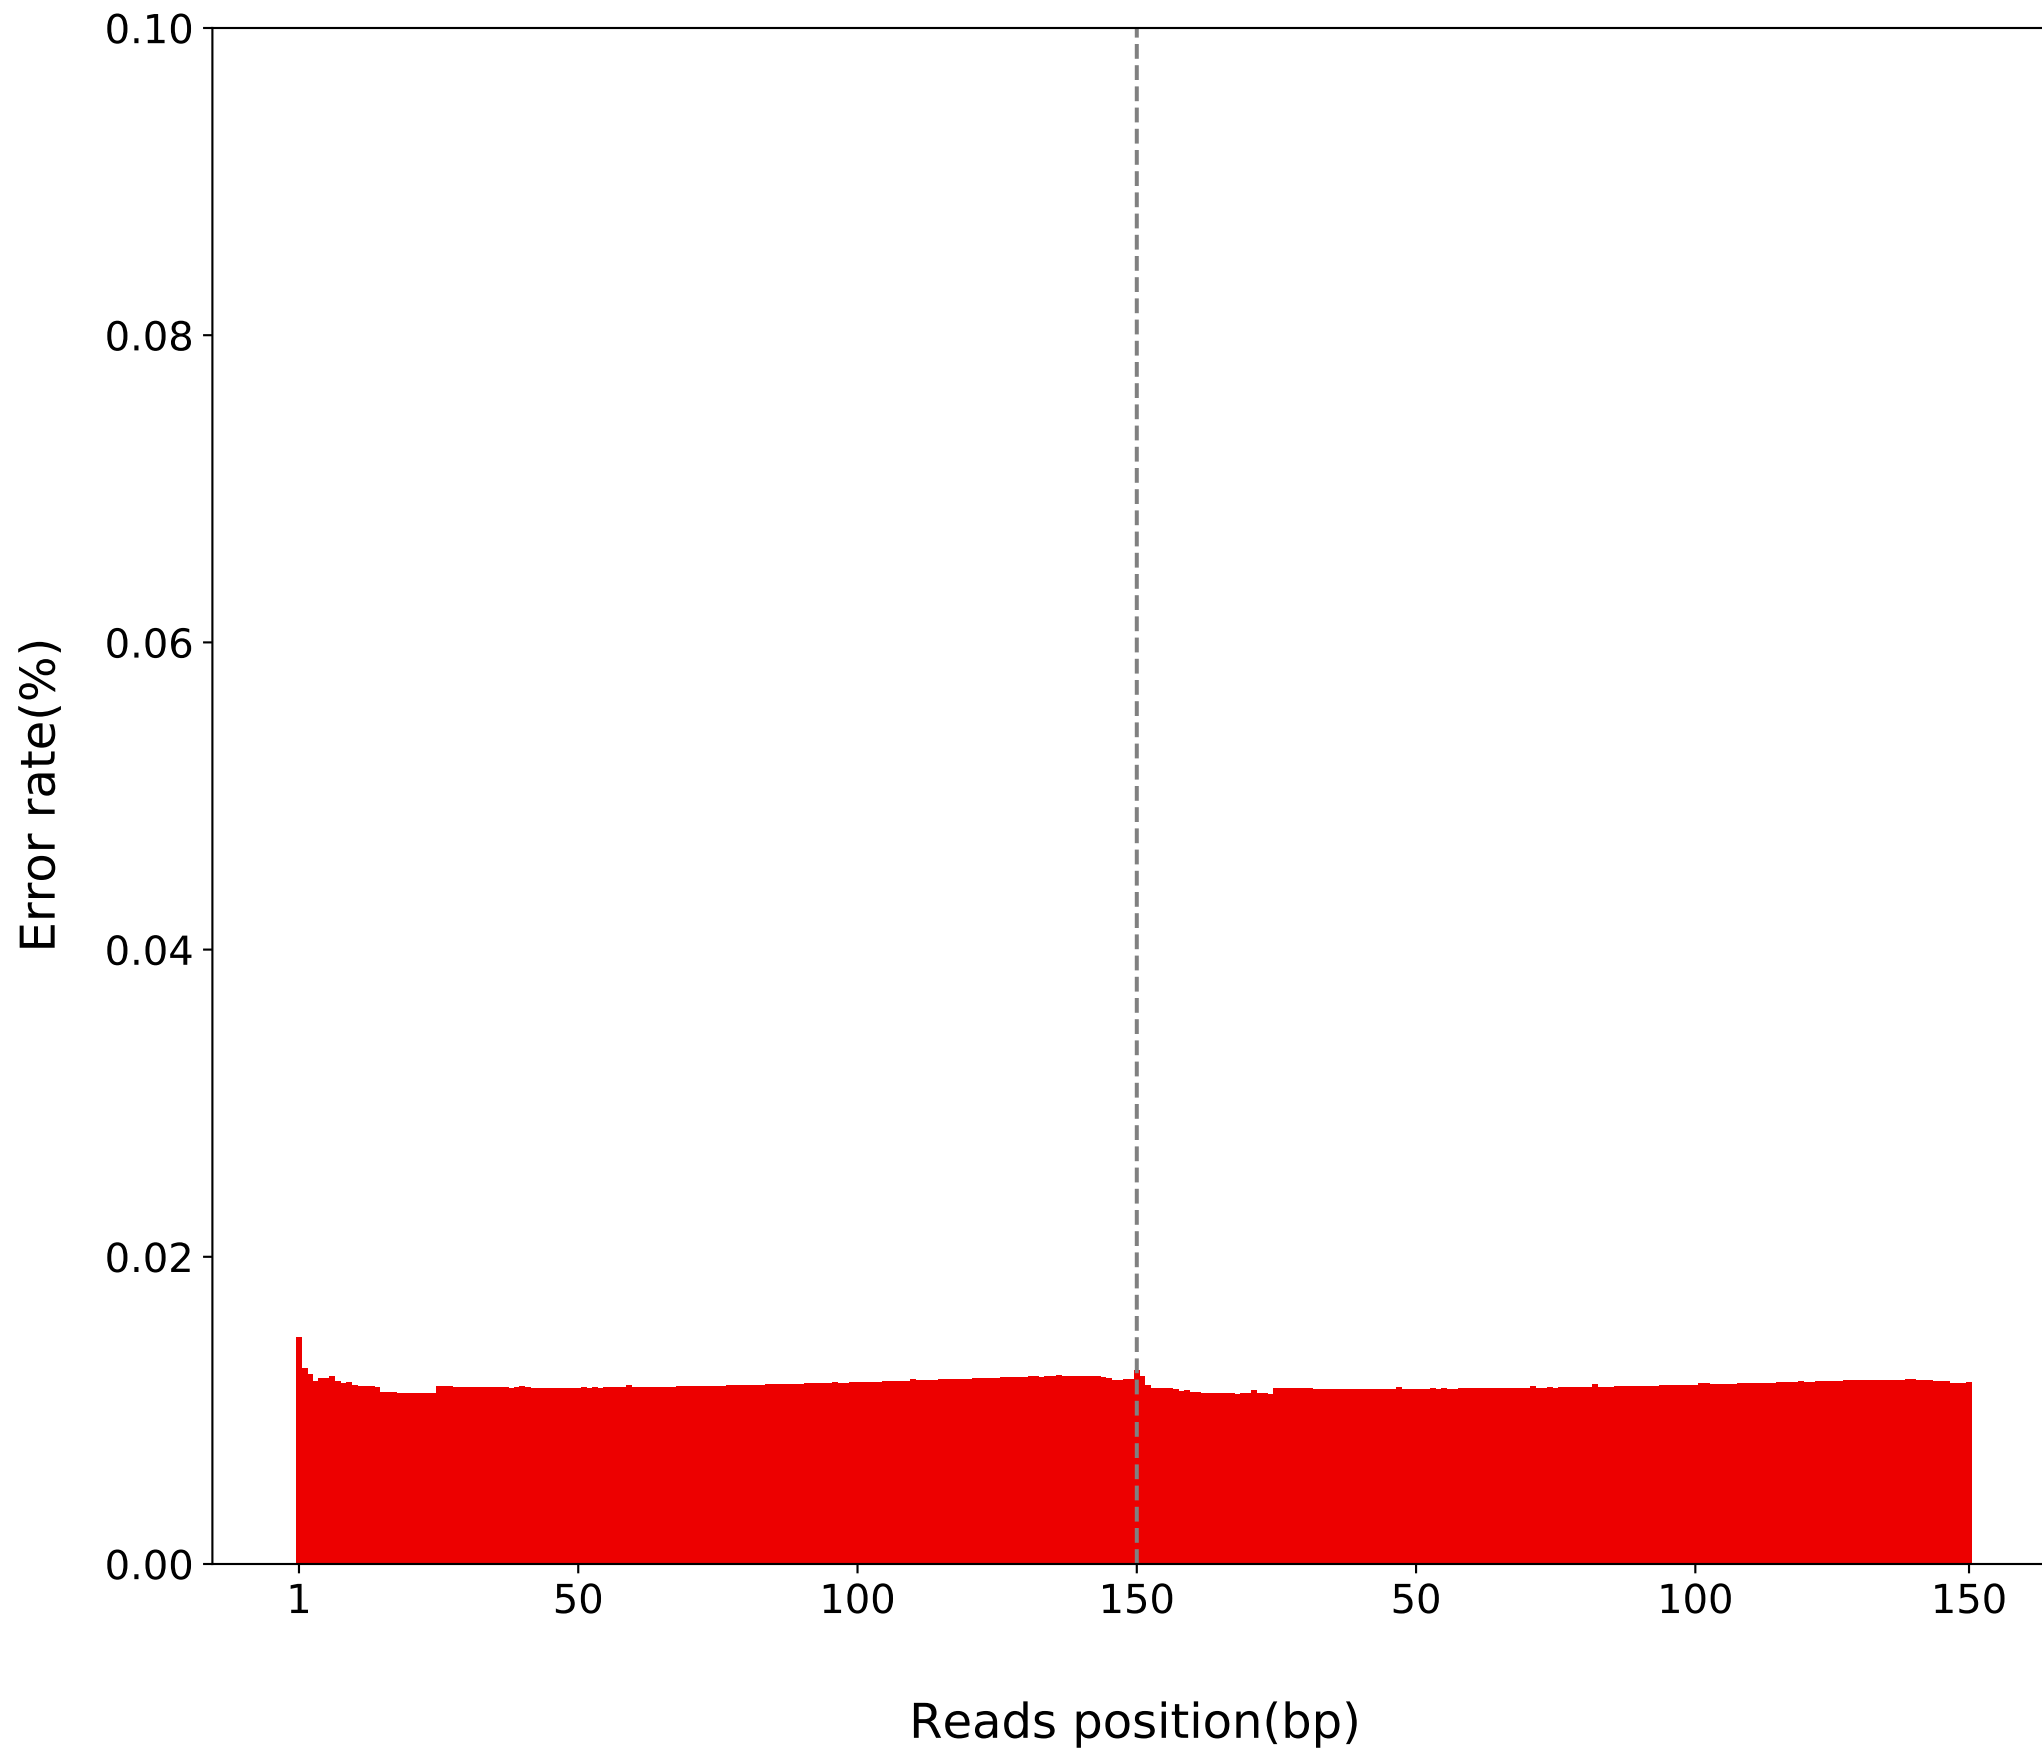

Supplement: Supplementary file 536 [file S3.cleandata.qual.pdf › Source data/1.RNA-Seq source data/2.HUVECs/result/2.quality_control/2.1.fastqc/S3.cleandata.qual.pdf]

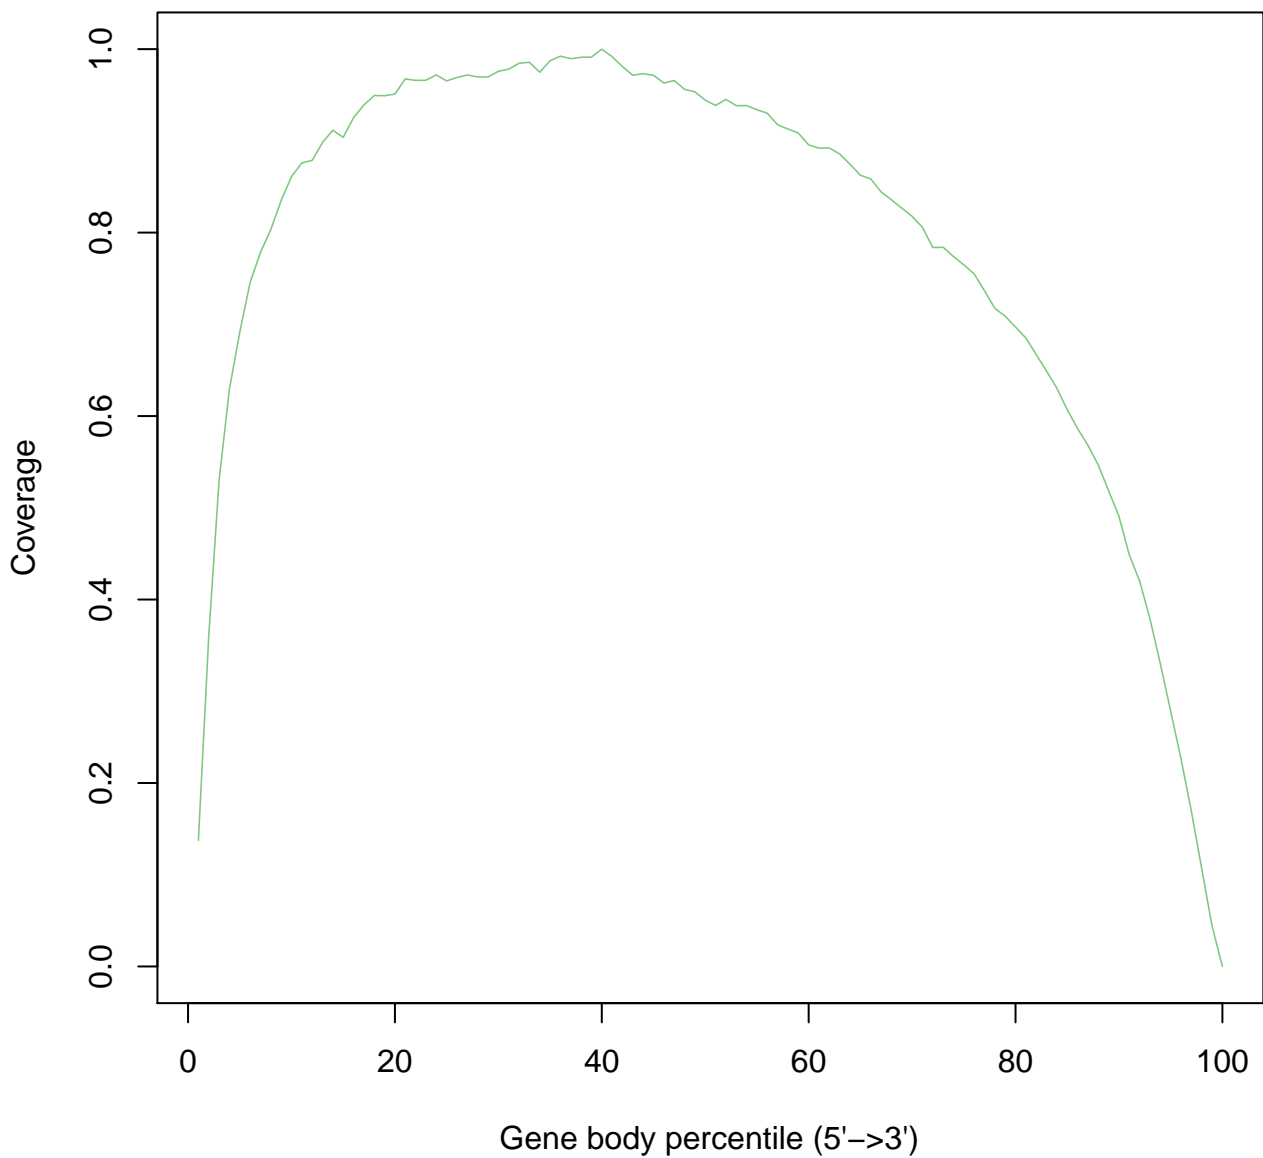

Supplement: Supplementary file 537 [file C1.coverage.geneBodyCoverage.curves.pdf › Source data/1.RNA-Seq source data/2.HUVECs/result/2.quality_control/2.2.rnaseq_qc/C1.coverage.geneBodyCoverage.curves.pdf]

read\_distribution(C1)

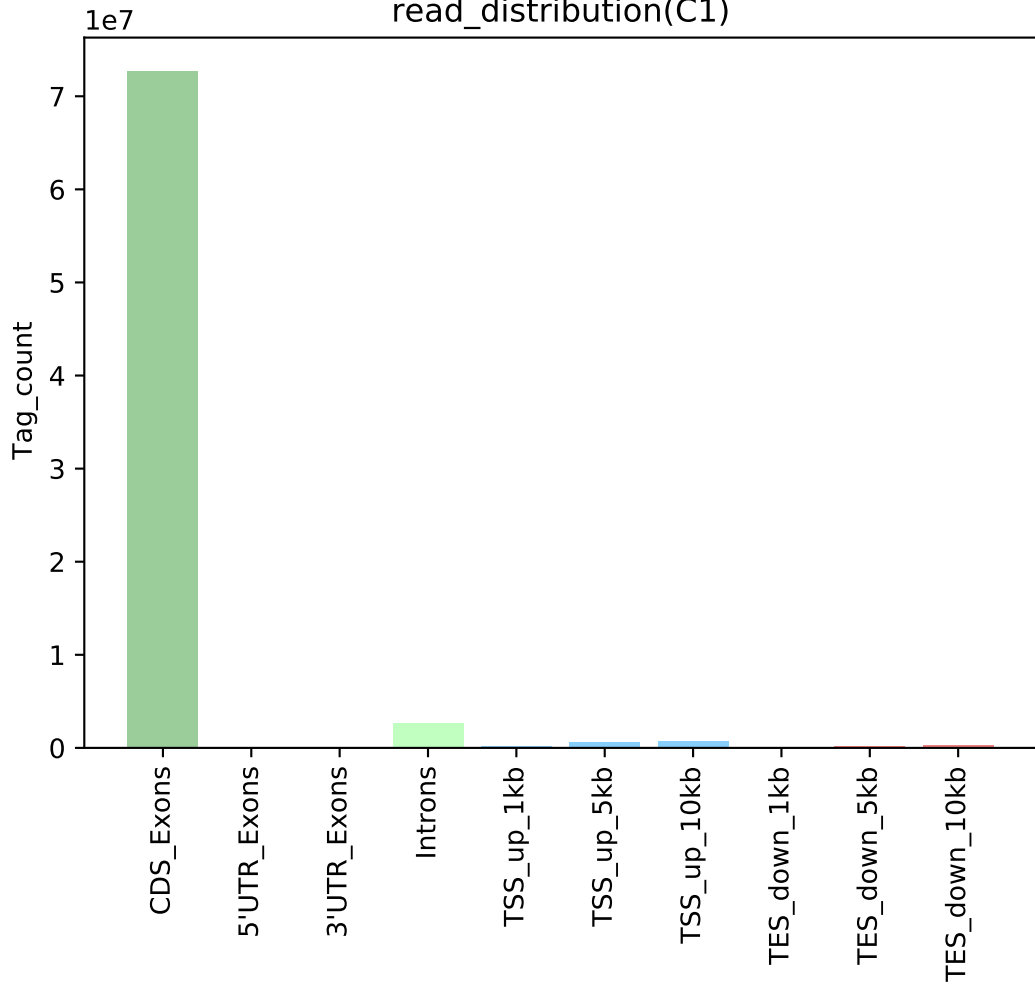

Supplement: Supplementary file 538 [file C1.read_distribution.pdf › Source data/1.RNA-Seq source data/2.HUVECs/result/2.quality_control/2.2.rnaseq_qc/C1.read_distribution.pdf]

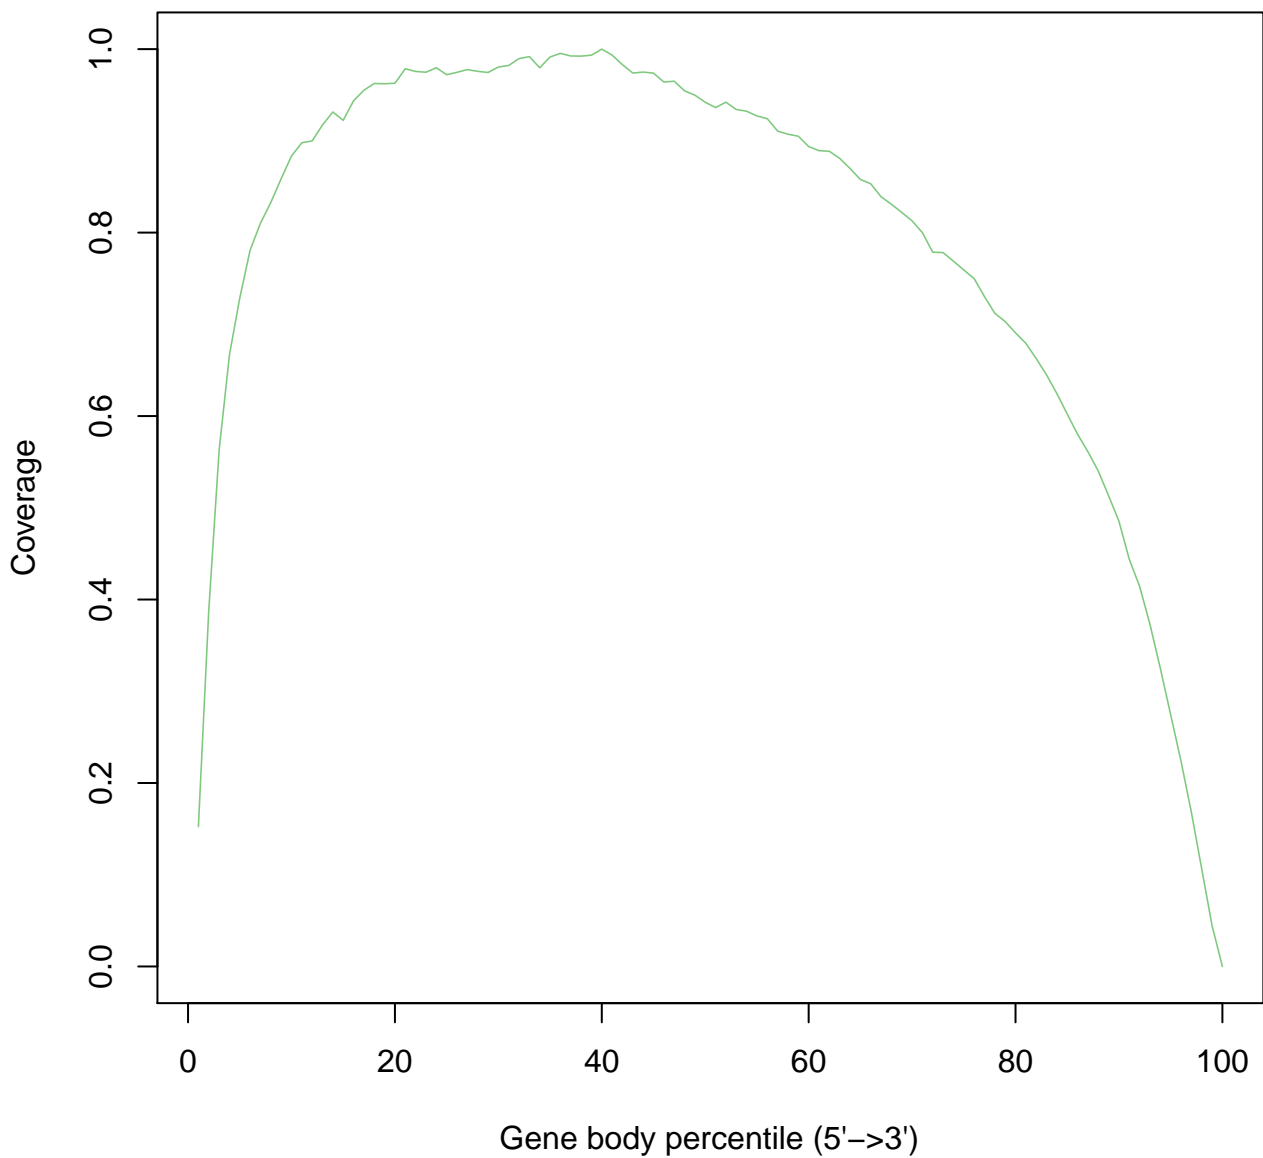

Supplement: Supplementary file 539 [file C2.coverage.geneBodyCoverage.curves.pdf › Source data/1.RNA-Seq source data/2.HUVECs/result/2.quality_control/2.2.rnaseq_qc/C2.coverage.geneBodyCoverage.curves.pdf]

read\_distribution(C2)

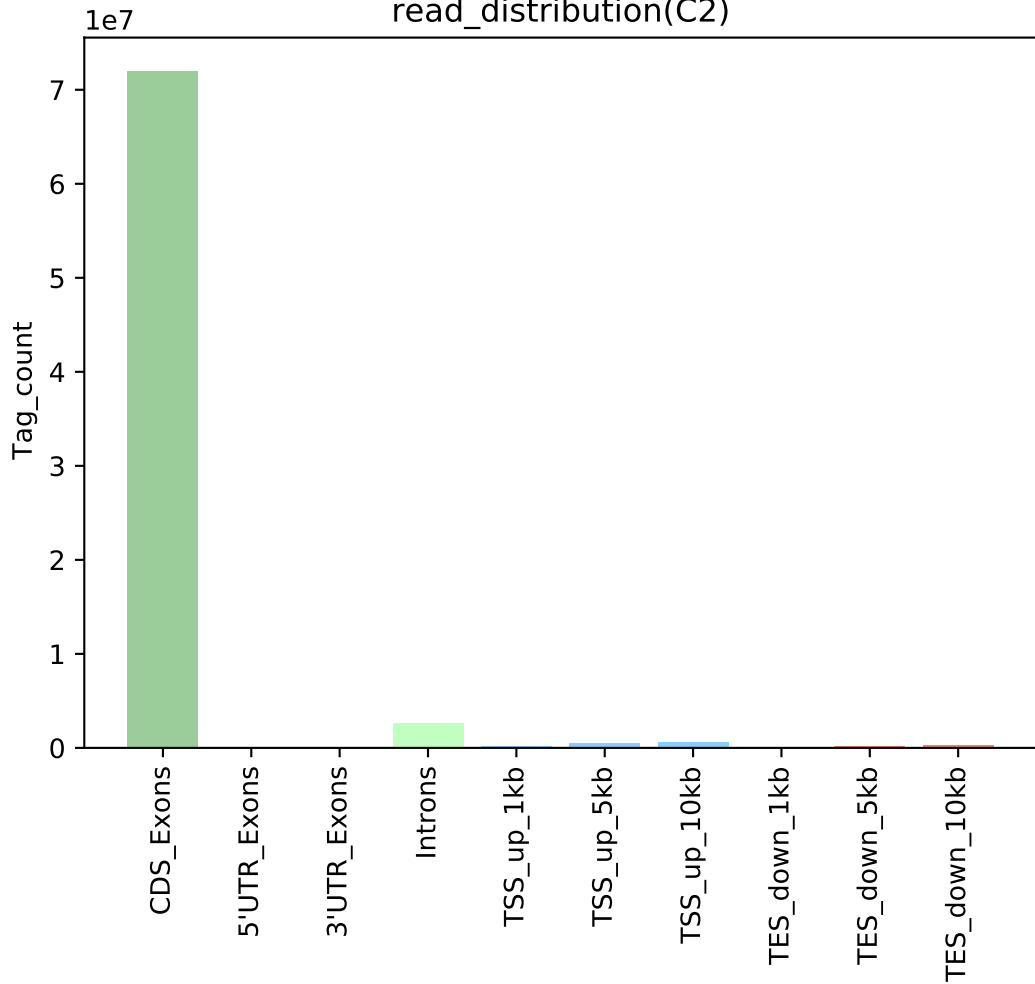

Supplement: Supplementary file 540 [file C2.read_distribution.pdf › Source data/1.RNA-Seq source data/2.HUVECs/result/2.quality_control/2.2.rnaseq_qc/C2.read_distribution.pdf]

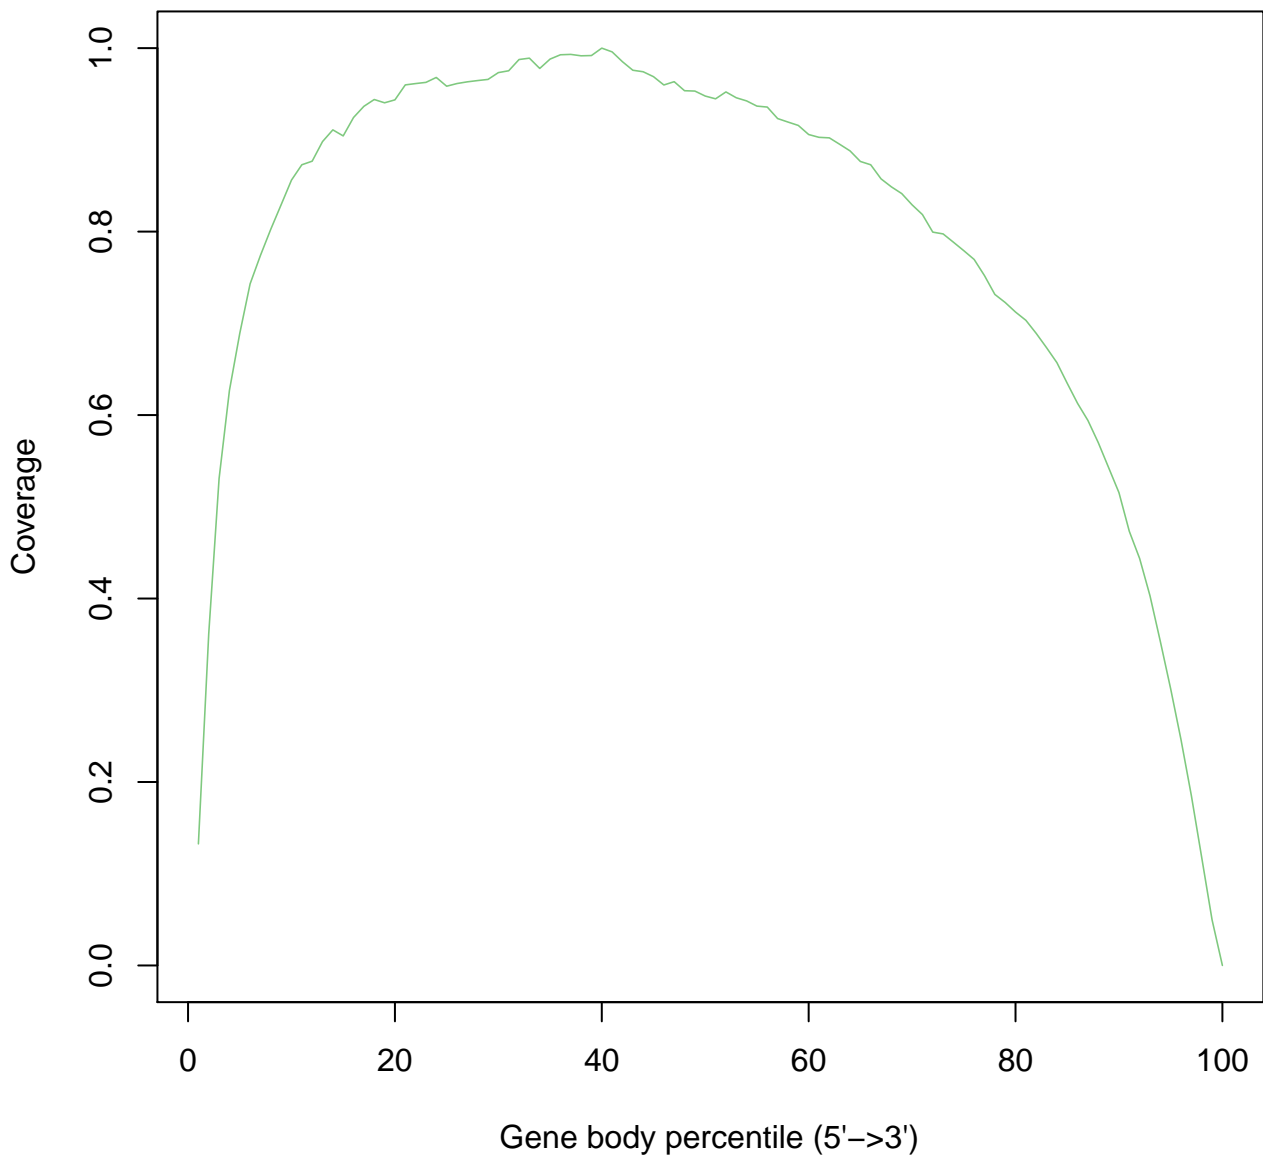

Supplement: Supplementary file 541 [file C3.coverage.geneBodyCoverage.curves.pdf › Source data/1.RNA-Seq source data/2.HUVECs/result/2.quality_control/2.2.rnaseq_qc/C3.coverage.geneBodyCoverage.curves.pdf]

read\_distribution(C3)

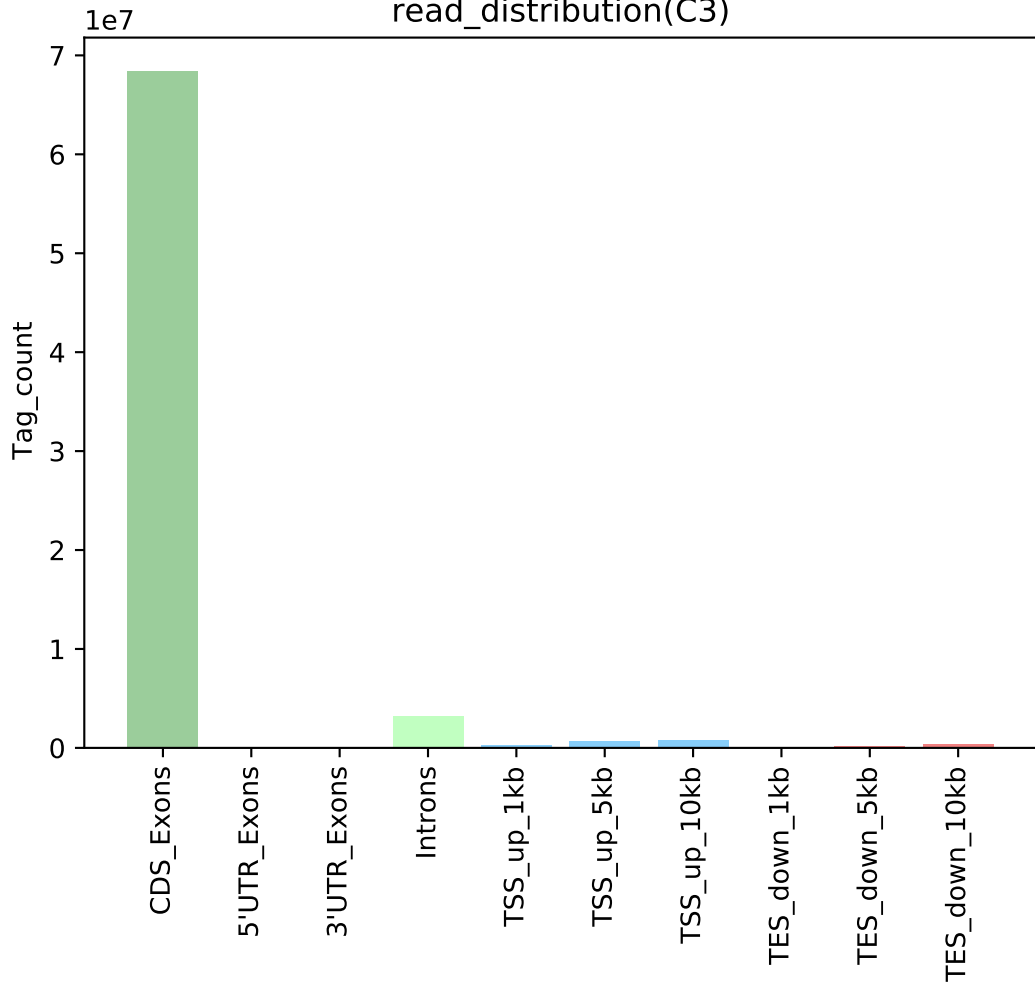

Supplement: Supplementary file 542 [file C3.read_distribution.pdf › Source data/1.RNA-Seq source data/2.HUVECs/result/2.quality_control/2.2.rnaseq_qc/C3.read_distribution.pdf]

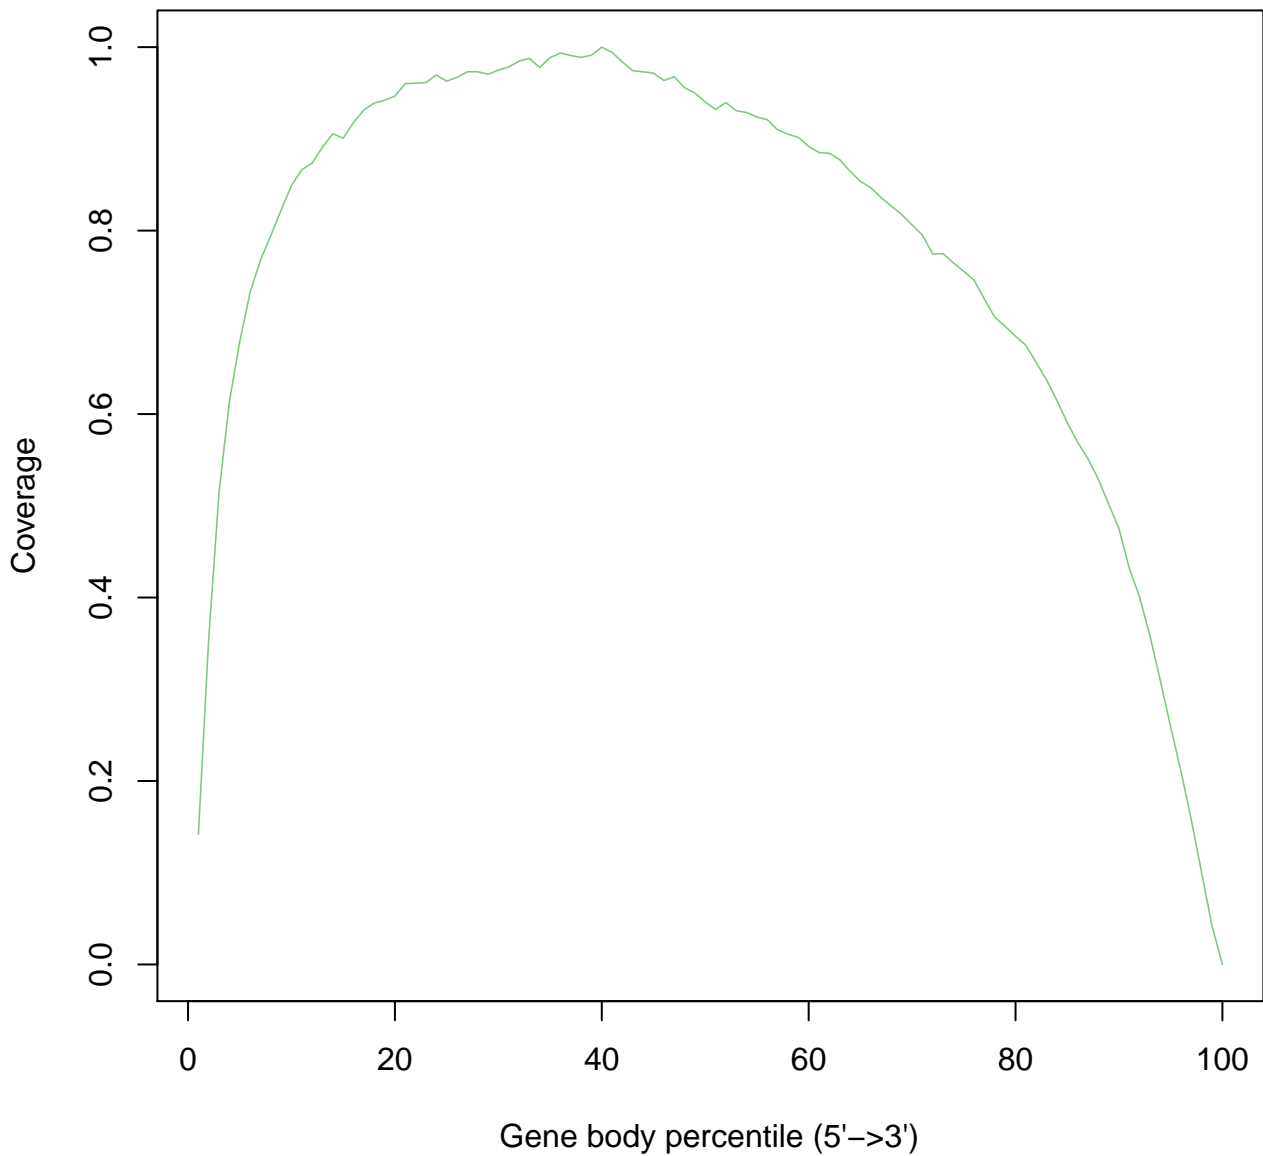

Supplement: Supplementary file 543 [file S1.coverage.geneBodyCoverage.curves.pdf › Source data/1.RNA-Seq source data/2.HUVECs/result/2.quality_control/2.2.rnaseq_qc/S1.coverage.geneBodyCoverage.curves.pdf]

read\_distribution(S1)

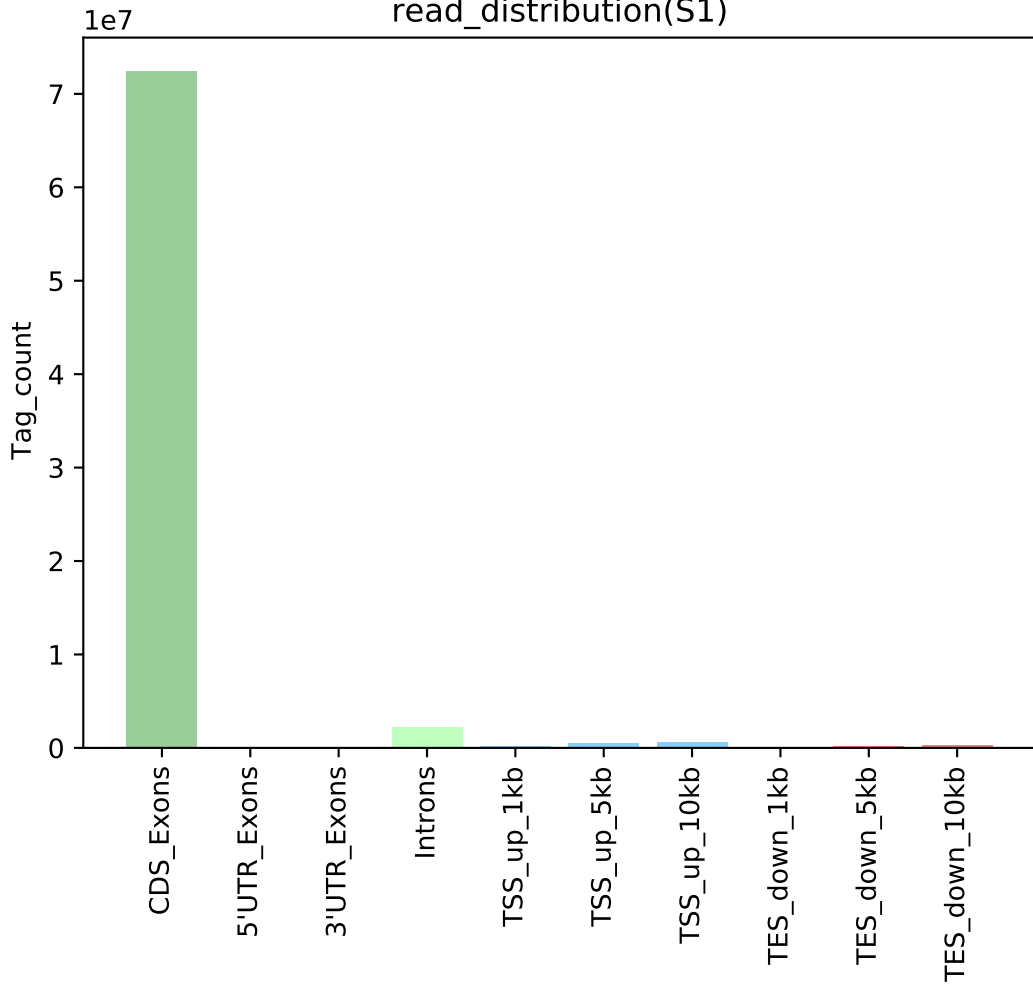

Supplement: Supplementary file 544 [file S1.read_distribution.pdf › Source data/1.RNA-Seq source data/2.HUVECs/result/2.quality_control/2.2.rnaseq_qc/S1.read_distribution.pdf]

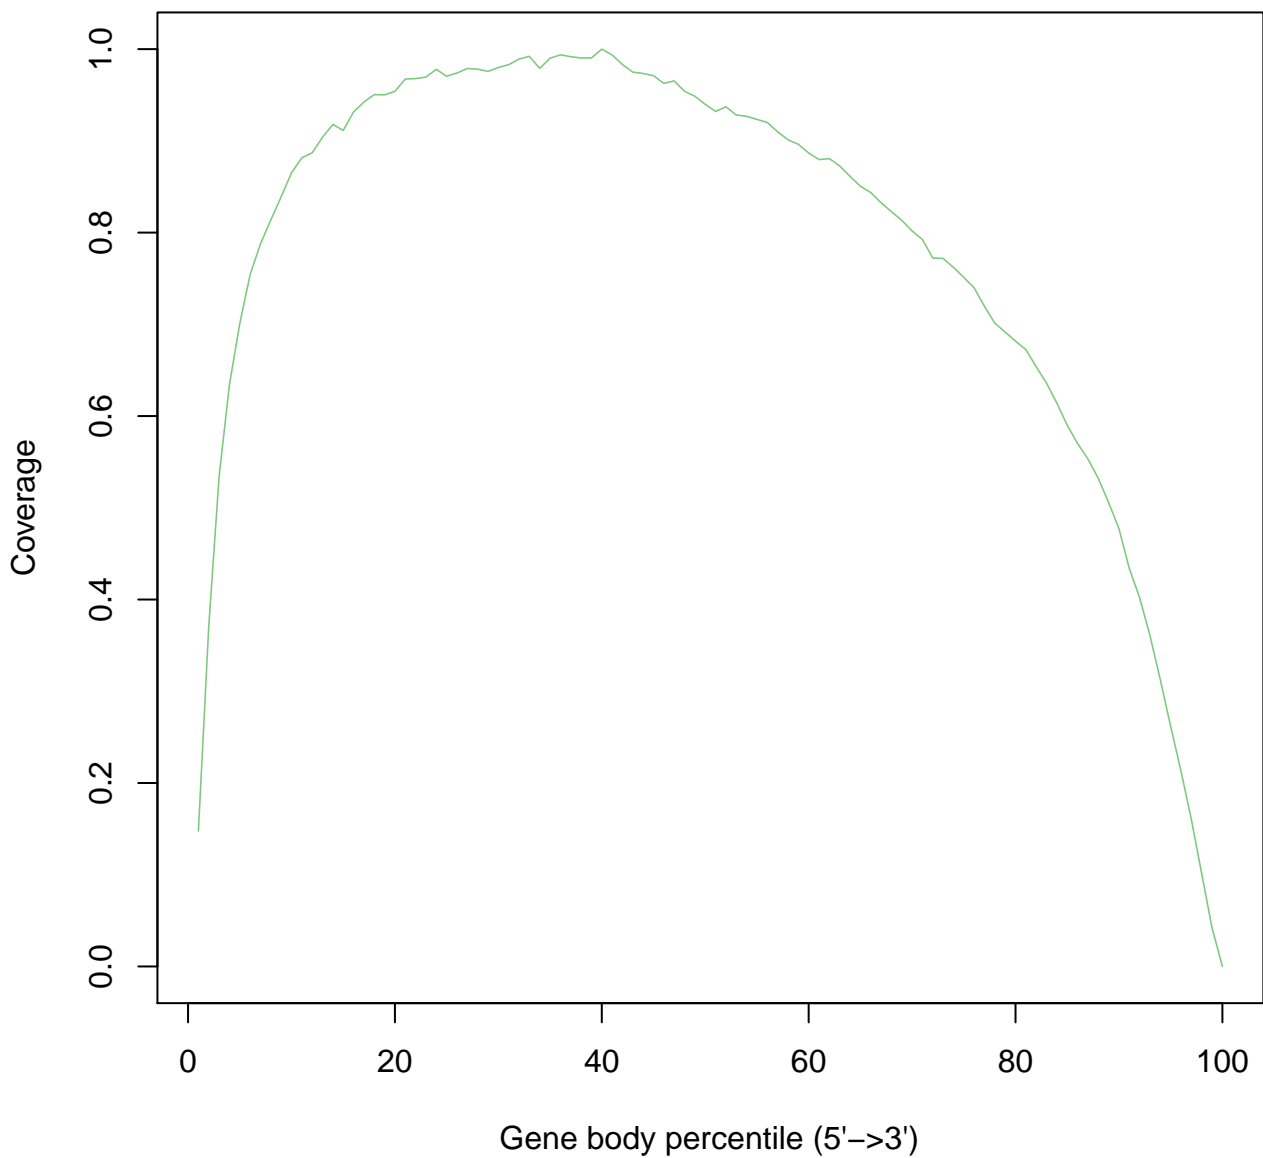

Supplement: Supplementary file 545 [file S2.coverage.geneBodyCoverage.curves.pdf › Source data/1.RNA-Seq source data/2.HUVECs/result/2.quality_control/2.2.rnaseq_qc/S2.coverage.geneBodyCoverage.curves.pdf]

read\_distribution(S2)

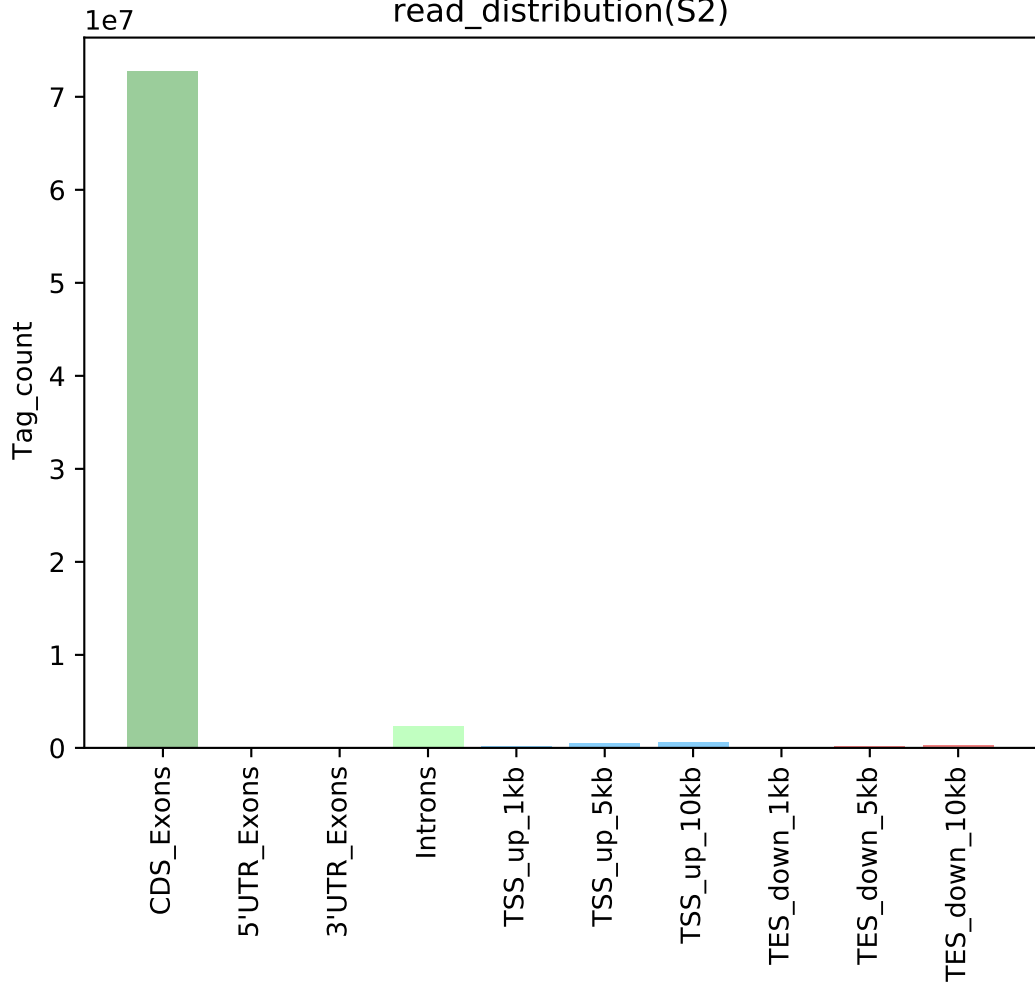

Supplement: Supplementary file 546 [file S2.read_distribution.pdf › Source data/1.RNA-Seq source data/2.HUVECs/result/2.quality_control/2.2.rnaseq_qc/S2.read_distribution.pdf]

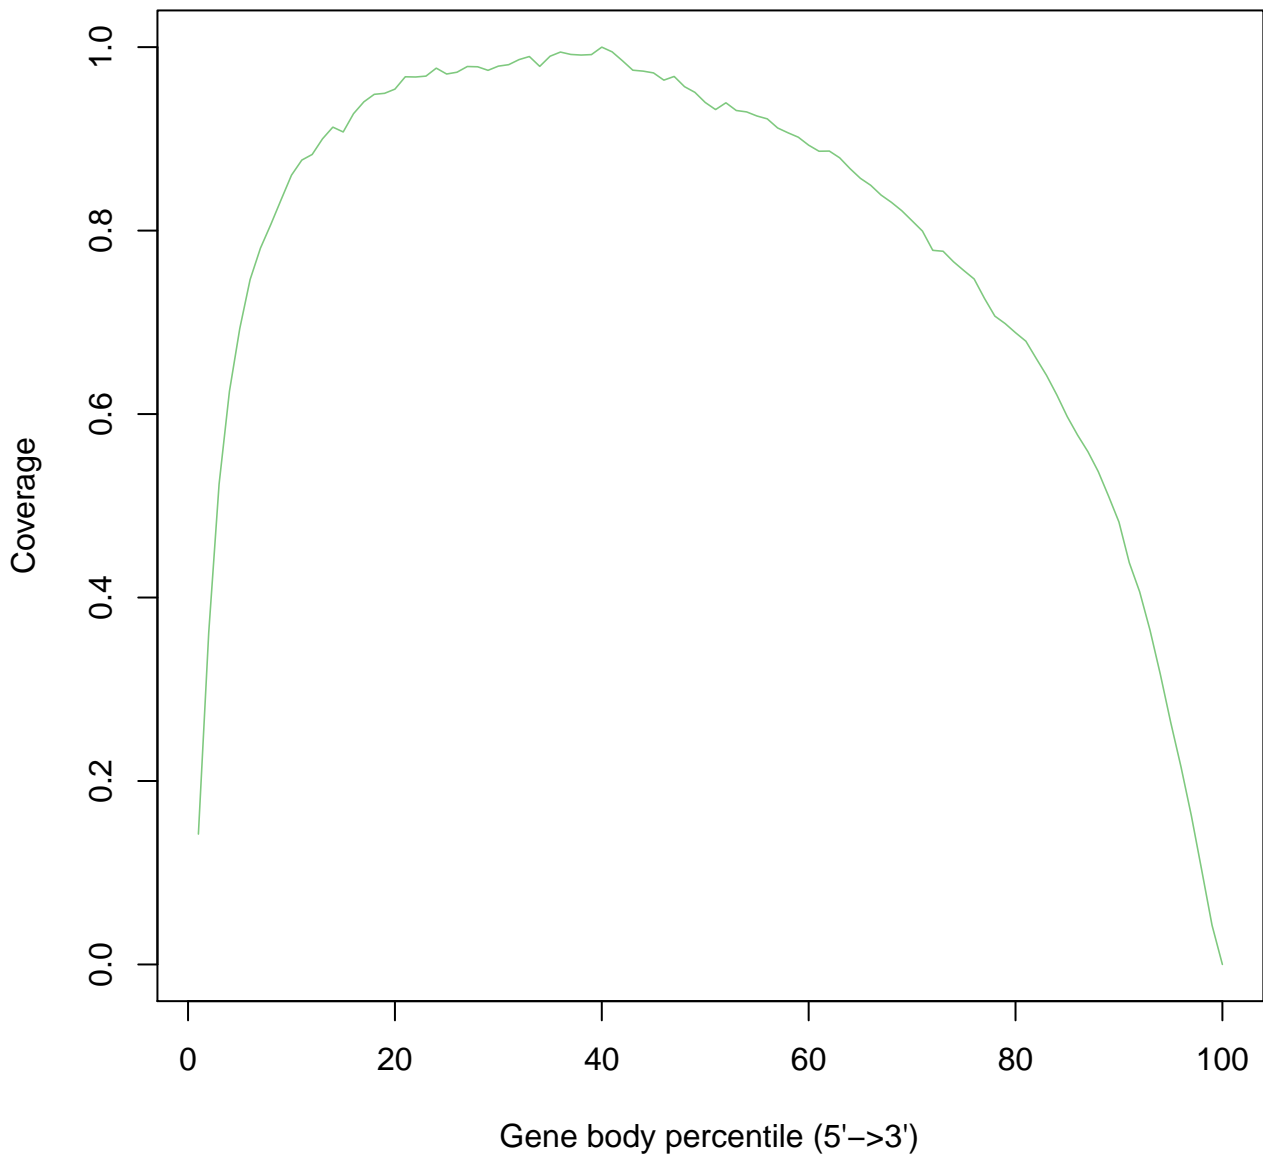

Supplement: Supplementary file 547 [file S3.coverage.geneBodyCoverage.curves.pdf › Source data/1.RNA-Seq source data/2.HUVECs/result/2.quality_control/2.2.rnaseq_qc/S3.coverage.geneBodyCoverage.curves.pdf]

read\_distribution(S3)

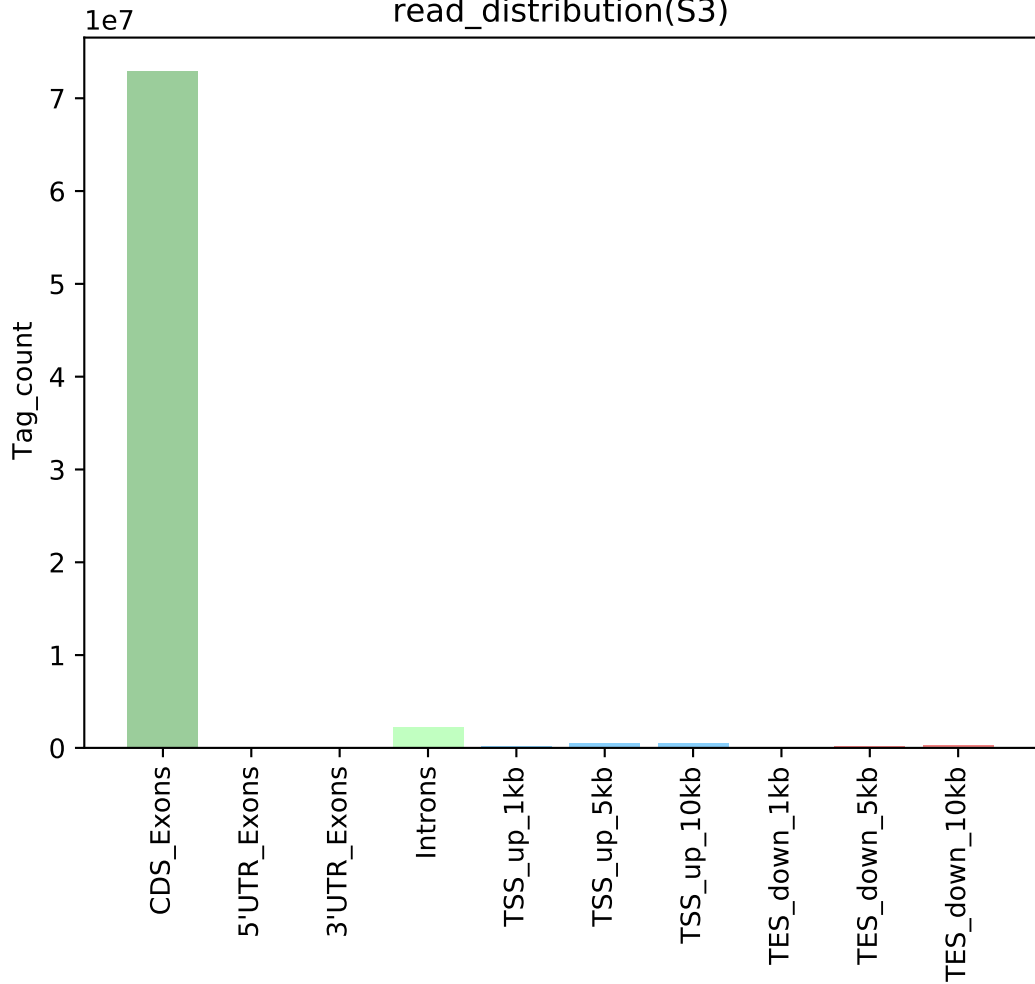

Supplement: Supplementary file 548 [file S3.read_distribution.pdf › Source data/1.RNA-Seq source data/2.HUVECs/result/2.quality_control/2.2.rnaseq_qc/S3.read_distribution.pdf]
